# Supplementary material for: Venomics of Remipede Crustaceans Reveals Novel Peptide Diversity and Illuminates the Venom’s Biological Role
Source: MDPI journal article supplement (doi:10.3390/toxins9080234), 2017-07-26
Supplement: s1 [file s1]

Supplementary Table 1: Venom gland proteomics

| Gel Band | Mass (kDa) | Protein | Accession    | Translation frame | Protein ID                               | SignalP | Peptides (>95%) | Expression (reads) | Coverage (%) | ProteinPilot Score (Total) |
|----------|------------|---------|--------------|-------------------|------------------------------------------|---------|-----------------|--------------------|--------------|----------------------------|
| 1        | 60         | 1       | c29839_g1_i1 | 3                 | Chitinase                                | N       | 14              | 7378101            | 28.30        | 21.55                      |
|          |            | 2       | c30148_g1_i2 | 3                 | Peptidase S1                             | Y       | 3               | 139510             | 14.18        | 5.37                       |
|          |            | 2       | c30148_g1_i3 | 1                 | Peptidase S1                             | N       | 3               | 87362              | 18.18        | 5.37                       |
|          |            | 2       | c30148_g1_i1 | 3                 | Peptidase S1                             | Y       | 3               | 364870             | 13.99        | 5.37                       |
|          |            | 2       | c25117_g1_i1 | 3                 | Peptidase S1                             | N       | 2               | 301                | 29.10        | 4.03                       |
|          |            | 3       | c30368_g1_i2 | 3                 | Peptidase S1 with LDLA domain            | Y       | 2               | 995917             | 4.19         | 3.39                       |
|          |            | 3       | c30675_g2_i2 | 4                 | Peptidase S1 with LDLA domain            | Y       | 1               | 1228052            | 2.16         | 2                          |
|          |            | 3       | c30675_g2_i1 | 5                 | Peptidase S1 with LDLA domain            | N       | 1               | 434416             | 2.59         | 2                          |
|          |            | 3       | c30675_g2_i4 | 6                 | Peptidase S1 with LDLA domain            | N       | 1               | 933783             | 1.38         | 2                          |
|          |            | 3       | c30675_g2_i3 | 5                 | Peptidase S1 with LDLA domain            | Y       | 1               | 1612752            | 1.16         | 2                          |
|          |            | 3       | c30368_g1_i3 | 3                 | Peptidase S1 with LDLA domain            | Y       | 1               | 615193             | 1.39         | 2                          |
|          |            | 3       | c29982_g3_i1 | 5                 | Peptidase S1 with LDLA domain            | Y       | 1               | 381583             | 1.71         | 2                          |
|          |            | 3       | c25446_g1_i4 | 2                 | Peptidase S1 with LDLA domain            | N       | 1               | 14                 | 7.29         | 2                          |
| 2        | 50         | 1       | c29839_g1_i1 | 3                 | Chitinase                                | N       | 8               | 7378101            | 21.44        | 10.24                      |
|          |            | 2       | c27884_g1_i1 | 3                 | Chitinase                                | N       | 3               | 17222              | 18.18        | 3.76                       |
|          |            | 2       | c28694_g4_i1 | 4                 | Chitinase                                | N       | 3               | 2471               | 13.30        | 3.33                       |
|          |            | 3       | c30148_g1_i3 | 1                 | Peptidase S1                             | N       | 1               | 87362              | 12.46        | 3.23                       |
|          |            | 3       | c30148_g1_i2 | 3                 | Peptidase S1                             | Y       | 1               | 139510             | 9.37         | 3.23                       |
|          |            | 3       | c30148_g1_i1 | 3                 | Peptidase S1                             | Y       | 1               | 364870             | 9.58         | 3.23                       |
|          |            | 4       | c57873_g1_i1 | 5                 | Thioredoxin                              | N       | 1               | 12                 | 9.20         | 2.66                       |
|          |            | 5       | c27020_g1_i1 | 4                 | CAP Protein                              | Y       | 1               | 67718              | 10.57        | 1.92                       |
| 3        | 40         | 1       | c29839_g1_i1 | 3                 | Chitinase                                | N       | 4               | 7378101            | 10.12        | 8.92                       |
|          |            | 2       | c30148_g1_i3 | 1                 | Peptidase S1                             | N       | 3               | 87362              | 12.46        | 6                          |
|          |            | 2       | c30148_g1_i2 | 3                 | Peptidase S1                             | Y       | 3               | 139510             | 9.37         | 6                          |
|          |            | 2       | c30148_g1_i1 | 3                 | Peptidase S1                             | Y       | 3               | 364870             | 9.58         | 6                          |
|          |            | 2       | c25117_g1_i1 | 3                 | Peptidase S1                             | N       | 2               | 301                | 14.93        | 4                          |
|          |            | 3       | c27020_g1_i1 | 4                 | CAP Protein                              | Y       | 1               | 67718              | 4.57         | 2                          |
| 4        | 37         | 1       | c30148_g1_i2 | 3                 | Peptidase S1                             | Y       | 4               | 139510             | 13.67        | 8                          |
|          |            | 1       | c30148_g1_i1 | 3                 | Peptidase S1                             | Y       | 4               | 364870             | 13.99        | 8                          |
|          |            | 1       | c30148_g1_i3 | 1                 | Peptidase S1                             | N       | 3               | 87362              | 15.15        | 6                          |
|          |            | 2       | c27577_g1_i3 | 3                 | Tropomyosin                              | N       | 2               |                    | 10.21        | 4.62                       |
|          |            | 2       | c27577_g1_i4 | 3                 | Tropomyosin                              | N       | 2               |                    | 11.11        | 4.62                       |
|          |            | 3       | c29839_g1_i1 | 3                 | Chitinase                                | N       | 2               | 7378101            | 3.09         | 3.12                       |
|          |            | 3       | c28694_g3_i1 | 5                 | Chitinase                                | N       | 1               | 23414              | 7.58         | 1.4                        |
|          |            | 3       | c28694_g2_i1 | 5                 | Chitinase                                | N       | 1               | 467                | 12.66        | 1.4                        |
|          |            | 3       | c16904_g1_i1 | 1                 | Chitinase                                | N       | 1               | 0                  | 13.33        | 1.4                        |
| 5        | 30         | 1       | c27020_g1_i1 | 4                 | CAP Protein                              | Y       | 35              | 67718              | 53.43        | 39.7                       |
|          |            | 2       | c30148_g1_i3 | 1                 | Peptidase S1                             | N       | 4               | 87362              | 18.52        | 8.01                       |
|          |            | 2       | c30148_g1_i2 | 3                 | Peptidase S1                             | Y       | 4               | 139510             | 11.39        | 8.01                       |
|          |            | 2       | c30148_g1_i1 | 3                 | Peptidase S1                             | Y       | 4               | 364870             | 11.66        | 8.01                       |
|          |            | 3       | c29839_g1_i1 | 3                 | Chitinase                                | N       | 3               | 7378101            | 5.49         | 4.01                       |
|          |            | 4       | c30368_g1_i2 | 3                 | Peptidase S1 with LDLA domain            | Y       | 3               | 995917             | 4.04         | 6                          |
|          |            | 4       | c30675_g2_i3 | 5                 | Peptidase S1 with LDLA domain            | Y       | 2               | 1612752            | 4.46         | 4                          |
|          |            | 4       | c30675_g2_i2 | 4                 | Peptidase S1 with LDLA domain            | Y       | 1               | 1228052            | 2.16         | 2                          |
|          |            | 4       | c30675_g2_i1 | 5                 | Peptidase S1 with LDLA domain            | N       | 1               | 434416             | 2.59         | 2                          |
|          |            | 4       | c30368_g1_i3 | 3                 | Peptidase S1 with LDLA domain            | Y       | 1               | 615193             | 1.39         | 2                          |
|          |            | 4       | c29982_g3_i1 | 5                 | Peptidase S1 with LDLA domain            | Y       | 1               | 381583             | 1.71         | 2                          |
|          |            | 4       | c25446_g1_i4 | 2                 | Peptidase S1 with LDLA domain            | N       | 1               | 14                 | 7.29         | 2                          |
|          |            | 5       | c18283_g1_i1 | 2                 | Prostasin                                | N       | 2               | 286704             | 8.79         | 4                          |
|          |            |         |              |                   | Chitin-binding domain containing protein | Y       | 2               |                    | 3.28         | 3.48                       |
|          |            | 6       | c29585_g1_i1 | 1                 | Peptidase S1                             | Y       | 3               | 316580             | 8.42         | 2.12                       |
|          |            | 7       | c27960_g1_i1 | 1                 | Peptidase S1                             | Y       | 3               | 316580             | 8.42         | 2.12                       |
|          |            | 8       | c30675_g2_i4 | 6                 | Peptidase S1 with LDLA domain            | N       | 2               | 933783             | 5.32         | 4                          |
|          |            | 8       | c30675_g2_i3 | 5                 | Peptidase S1 with LDLA domain            | Y       | 2               | 1612752            | 4.46         | 4                          |
|          |            | 9       | c57873_g1_i1 | 5                 | Thioredoxin                              | N       | 1               | 12                 | 4.73         | 2                          |
|          |            | 10      | c26920_g1_i1 | 5                 | Calycin                                  | Y       | 1               |                    | 2.48         | 2                          |
|          |            | 11      | c24110_g1_i1 | 2                 | Carboxypeptidase M14A                    | Y       | 1               | 189506             | 2.46         | 2                          |
| 6        | 26         | 1       | c30148_g1_i1 | 3                 | Peptidase S1                             | Y       | 11              | 364870             | 22.80        | 19.13                      |
|          |            | 2       | c27020_g1_i1 | 4                 | CAP protein                              | Y       | 9               | 67718              | 27.43        | 17.56                      |
|          |            | 3       | c29839_g1_i1 | 3                 | Chitinase                                | N       | 7               | 7378101            | 19.90        | 14.51                      |
|          |            | 4       | c29126_g1_i1 | 1                 | Peptidase S1                             | Y       | 6               | 72458              | 27.89        | 8.43                       |
|          |            | 5       | c25996_g1_i1 | 2                 | Peptidase S1 with LDLA domain            | Y       | 4               | 488359             | 13.24        | 7.13                       |
|          |            | 6       | c18283_g1_i1 | 2                 | Prostasin                                | N       | 10              | 286704             | 33.85        | 6.83                       |
|          |            | 7       | c27388_g1_i1 | 3                 | Peptidase S1 with LDLA domain            | Y       | 3               | 228907             | 8.82         | 5.89                       |
|          |            | 8       | c30368_g1_i2 | 3                 | Peptidase S1 with LDLA domain            | Y       | 8               | 995917             | 14.44        | 9.27                       |
|          |            | 9       | c29090_g1_i1 | 3                 | Peptidase S1                             | Y       | 3               | 140303             | 9.45         | 4.96                       |
|          |            | 10      | c30675_g2_i3 | 5                 | Peptidase S1 with LDLA domain            | Y       | 6               | 1612752            | 17.02        | 5.93                       |
|          |            | 10      | c30675_g2_i4 | 6                 | Peptidase S1 with LDLA domain            | N       | 6               | 933783             | 19.13        | 5.93                       |
|          |            | 10      | c30675_g2_i2 | 4                 | Peptidase S1 with LDLA domain            | Y       | 5               | 1228052            | 13.46        | 3.68                       |

|    |    |    |               |   |                                  |         |    |         |       |       |
|----|----|----|---------------|---|----------------------------------|---------|----|---------|-------|-------|
|    |    | 10 | c30675_g2_i1  | 5 | Peptidase S1 with LDLA domain    | N       | 5  | 434416  | 14.97 | 3.68  |
|    |    | 11 | c12686_g1_i1  | 3 | Peptidase S1                     | N       | 3  | 103249  | 10.67 | 4.79  |
|    |    | 12 | c29091_g1_i2  | 2 | Peptidase S1                     | Y       | 2  | 216342  | 12.86 | 4     |
|    |    | 12 | c29091_g1_i1  | 2 | Peptidase S1                     | Y       | 1  | 75244   | 4.68  | 2     |
|    |    | 13 | c11081_g1_i1  | 5 | Peptidase S1                     | N       | 2  |         | 41.51 | 3.44  |
|    |    | 14 | c29982_g5_i1  | 1 | Peptidase S1                     | N       | 2  | 29390   | 7.28  | 3.24  |
|    |    | 14 | c29982_g4_i1  | 1 | Peptidase S1                     | N       | 2  | 118055  | 5.85  | 3.24  |
|    |    | 15 | c29982_g1_i1  | 6 | Peptidase S1                     | N       | 2  | 196885  | 14.04 | 3.1   |
|    |    | 16 | c27101_g1_i1  | 2 | Peptidase S1                     | N       | 3  | 140921  | 17.19 | 3.64  |
|    |    | 17 | c29982_g2_i1  | 5 | Peptidase S1 with LDLA domain    | Y       | 4  | 191528  | 11.97 | 2.73  |
|    |    |    |               |   | Chitin-binding domain containing |         |    |         |       |       |
|    |    | 18 | c29585_g1_i1  | 1 | protein                          | Y       | 2  |         | 7.29  | 2.37  |
|    |    | 19 | c28694_g4_i1  | 4 | Chitinase                        | N       | 1  | 2471    | 13.83 | 2     |
|    |    | 19 | c27884_g1_i1  | 3 | Chitinase                        | N       | 1  | 17222   | 14.69 | 2     |
|    |    | 20 | c27960_g1_i1  | 1 | Peptidase S1                     | Y       | 3  | 316580  | 8.42  | 2     |
|    |    | 21 | c23479_g2_i1  | 1 | Peptidase S1                     | N       | 2  | 68533   | 8.99  | 2     |
| 7  | 25 | 1  | c30675_g2_i4  | 6 | Peptidase S1 with LDLA domain    | 0.109   | 29 | 933783  | 26.82 | 28    |
|    |    | 1  | c30675_g2_i3  | 5 | Peptidase S1 with LDLA domain    | 0.440 Y | 29 | 1612752 | 22.48 | 28    |
|    |    | 2  | c30148_g1_i1  | 3 | Peptidase S1                     | 0.604 Y | 14 | 364870  | 28.24 | 22.1  |
|    |    | 2  | c30148_g1_i2  | 3 | Peptidase S1                     | 0.602 Y | 13 | 139510  | 25.82 | 22.1  |
|    |    | 3  | c18283_g1_i1  | 2 | Prostasin                        | 0.173   | 38 | 286704  | 39.79 | 24    |
|    |    | 4  | c30368_g1_i2  | 3 | Peptidase S1 with LDLA domain    | 0.391 Y | 20 | 995917  | 18.94 | 20.03 |
|    |    | 5  | c29982_g1_i1  | 6 | Peptidase S1                     | 0.098   | 7  | 196885  | 47.19 | 12    |
|    |    | 6  | c29839_g1_i1  | 3 | Chitinase                        | 0.21    | 6  | 7378101 | 9.61  | 12    |
|    |    |    |               |   | Chitin-binding domain containing |         |    |         |       |       |
|    |    | 7  | c29585_g1_i1  | 1 | protein                          | 0.450 Y | 5  |         | 9.84  | 10    |
|    |    | 8  | c27057_g1_i2  | 1 | Calycin                          | 0.882 Y | 4  |         | 13.73 | 8.05  |
|    |    | 8  | c27057_g1_i1  | 1 | Calycin                          | 0.882 Y | 4  |         | 13.48 | 8.05  |
|    |    | 9  | c27960_g1_i1  | 1 | Peptidase S1                     | 0.444 Y | 10 | 316580  | 27.55 | 10.04 |
|    |    | 10 | c57873_g1_i1  | 5 | Thioredoxin                      | 0.183   | 5  | 12      | 13.93 | 8     |
|    |    | 11 | c13598_g1_i1  | 5 | Peptidase S1                     | 0.438 Y | 5  | 775049  | 19.06 | 8.01  |
|    |    | 12 | c25996_g1_i1  | 2 | Peptidase S1 with LDLA domain    | 0.731 Y | 2  | 488359  | 16.81 | 4.01  |
|    |    | 13 | c27884_g1_i1  | 3 | Chitinase                        | 0.274   | 2  | 17222   | 14.69 | 4     |
|    |    | 13 | c28694_g4_i1  | 4 | Chitinase                        | 0.327   | 1  | 2471    | 6.38  | 2     |
|    |    |    |               |   | Chitin-binding domain containing |         |    |         |       |       |
|    |    | 14 | c136843_g1_i1 | 2 | protein                          | N       | 2  |         | 36.92 | 4     |
|    |    | 15 | c30148_g1_i3  | 1 | Peptidase S1                     | 0.328   | 11 | 87362   | 26.60 | 18.06 |
|    |    | 16 | c27030_g1_i2  | 2 | Chitinase                        | 0.107   | 4  | 4118    | 43.00 | 8     |
|    |    | 16 | c27030_g1_i1  | 3 | Chitinase                        | 0.112   | 3  | 18858   | 62.02 | 6     |
|    |    | 17 | c29982_g3_i1  | 5 | Peptidase S1 with LDLA domain    | 0.791 Y | 2  | 381583  | 7.58  | 4     |
|    |    | 17 | c29982_g2_i2  | 5 | Peptidase S1 with LDLA domain    | 0.800 Y | 1  | 88749   | 4.71  | 2     |
|    |    | 18 | c25446_g1_i4  | 2 | Peptidase S1 with LDLA domain    | 0.126   | 3  | 14      | 16.67 | 4     |
|    |    | 18 | c30675_g2_i3  | 5 | Peptidase S1 with LDLA domain    | 0.440 Y | 29 | 1612752 | 22.48 | 28    |
|    |    | 18 | c30675_g2_i2  | 4 | Peptidase S1 with LDLA domain    | 0.754 Y | 20 | 1228052 | 14.45 | 20.03 |
|    |    | 18 | c30675_g2_i1  | 5 | Peptidase S1 with LDLA domain    | 0.102   | 20 | 434416  | 17.37 | 20.03 |
|    |    | 18 | c25446_g1_i2  | 2 | Peptidase S1 with LDLA domain    | 0.126   | 2  | 37      | 5.14  | 2     |
|    |    | 18 | c25446_g1_i1  | 2 | Peptidase S1 with LDLA domain    | 0.126   | 2  | 39      | 6.62  | 2     |
|    |    | 19 | c27162_g1_i1  | 6 | Peptidase S1                     | 0.102   | 4  | 21533   | 20.95 | 4     |
|    |    | 20 | c27020_g1_i1  | 4 | CAP protein                      | 0.450 Y | 1  | 67718   | 2.57  | 2     |
|    |    |    |               |   | Chitin-binding domain containing |         |    |         |       |       |
| 8  | 20 | 1  | c29585_g1_i1  | 1 | protein                          | 0.450 Y | 4  |         | 13.66 | 5.1   |
|    |    | 2  | c30148_g1_i2  | 3 | Peptidase S1                     | 0.602 Y | 1  | 139510  | 15.44 | 3.15  |
|    |    | 2  | c30148_g1_i3  | 1 | Peptidase S1                     | 0.328   | 1  | 87362   | 18.18 | 3.15  |
|    |    | 2  | c30148_g1_i1  | 3 | Peptidase S1                     | 0.604 Y | 1  | 364870  | 13.99 | 3.15  |
|    |    | 2  | c25117_g1_i1  | 3 | Peptidase S1                     | 0.104   | 0  | 301     | 27.61 | 1.17  |
|    |    |    |               |   | Chitin-binding domain containing |         |    |         |       |       |
| 9  | 15 | 3  | c136843_g1_i1 | 2 | protein                          |         | 1  |         | 46.15 | 2.11  |
|    |    | 1  | c30148_g1_i1  | 3 | Peptidase S1                     | 0.602 Y | 11 | 139510  | 16.96 | 9.5   |
|    |    | 1  | c30148_g1_i2  | 3 | Peptidase S1                     | 0.604 Y | 11 | 364870  | 17.36 | 9.5   |
| 10 | 12 | 1  | c30148_g1_i3  | 1 | Peptidase S1                     | 0.328   | 11 | 87362   | 18.18 | 7.1   |
|    |    | 1  | c30148_g1_i2  | 3 | Peptidase S1                     | 0.602 Y | 4  | 139510  | 16.96 | 9.5   |
|    |    | 1  | c30148_g1_i1  | 3 | Peptidase S1                     | 0.604 Y | 4  | 364870  | 17.36 | 9.5   |
|    |    | 1  | c30148_g1_i3  | 1 | Peptidase S1                     | 0.328   | 3  | 87362   | 18.18 | 7.1   |
|    |    | 2  | c29839_g1_i1  | 3 | Chitinase                        | 0.21    | 2  | 7378101 | 3.087 | 3.09  |
|    |    | 2  | c28694_g3_i1  | 5 | Chitinase                        | 0.107   | 1  | 23414   | 7.576 | 2     |
|    |    | 2  | c28694_g2_i1  | 5 | Chitinase                        | 0.112   | 1  | 467     | 12.66 | 2     |
|    |    | 2  | c16904_g1_i1  | 1 | Chitinase                        | 0.114   | 1  | 0       | 13.33 | 2     |
|    |    |    |               |   | 13.6 kDa protein with no BLAST   |         |    |         |       |       |
|    |    | 3  | c13428_g1_i2  | 3 | hits (UniProt KB)                | 0.506 Y | 1  |         | 2.896 | 1.59  |
|    |    | 3  | c13428_g1_i1  | 3 | 13.6 kDa protein with no BLAST   | 0.506 Y | 1  |         |       |       |
|    |    |    |               |   | hits (UniProt KB)                |         |    |         | 2.694 | 1.59  |

**Supplementary Table 2: Venom gland tissue transcriptomics**

| Name of toxin protein family        | ID of putative toxin contigs | Match via proteomics | Signal Peptide | Number of high-support contigs (reads > 25) | Lengths of contigs | Number of reads | FPKM            |
|-------------------------------------|------------------------------|----------------------|----------------|---------------------------------------------|--------------------|-----------------|-----------------|
| <b>C1-like domain</b>               | c173255_g1_i1                |                      | yes            | <b>0 / 1</b>                                | <b>919</b>         | <b>21</b>       | <b>0.94</b>     |
| <b>Calycin</b>                      | c26920_g1_i1                 | yes                  | yes            |                                             | 1,158              | 81,138          | 2,880.98        |
|                                     | c27057_g1_i1                 | yes                  | yes            |                                             | 1,890              | 45,640          | 992.91          |
|                                     | c27057_g1_i2                 | yes                  | yes            |                                             | 1,847              | 35,449          | 789.15          |
|                                     | c23125_g1_i1                 | -                    | yes            |                                             | 1,018              | 297             | 12.00           |
|                                     | c27565_g1_i1                 | -                    | yes            |                                             | 1,017              | 206             | 8.33            |
|                                     | c24433_g1_i2                 | -                    | -              |                                             | 989                | 152             | 6.32            |
|                                     | c28078_g2_i1                 | -                    | yes            |                                             | 1,161              | 108             | 3.82            |
|                                     | c30135_g4_i1                 | -                    | yes            |                                             | 1,782              | 147             | 3.39            |
|                                     | c24433_g1_i3                 | -                    | -              |                                             | 594                | 45              | 3.11            |
|                                     | c1253_g1_i1                  | -                    | yes            |                                             | 1,246              | 78              | 2.57            |
|                                     | c28078_g1_i1                 | -                    | yes            |                                             | 2,080              | 119             | 2.35            |
|                                     | c83371_g1_i1                 | -                    | -              |                                             | <b>751</b>         | <b>24</b>       | <b>1.31</b>     |
|                                     | c64218_g1_i1                 | -                    | -              |                                             | <b>595</b>         | <b>11</b>       | <b>0.76</b>     |
|                                     | c179908_g1_i1                | -                    | -              |                                             | <b>1,097</b>       | <b>19</b>       | <b>0.71</b>     |
|                                     | c154025_g1_i1                | -                    | -              |                                             | <b>383</b>         | <b>1</b>        | <b>0.11</b>     |
| <i>Total (high-support contigs)</i> |                              |                      |                | <b>11 / 15</b>                              |                    | <b>163,379</b>  | <b>4,704.93</b> |
| <b>CAP</b>                          | c27020_g1_i1                 | yes                  | yes            |                                             | 1,048              | 67,718          | 2,656.86        |
|                                     | c17634_g1_i1                 | -                    | yes            |                                             | 1,032              | 25,221          | 1,004.86        |
|                                     | c30341_g1_i1                 | -                    | yes            |                                             | 1,218              | 17,300          | 584.01          |
|                                     | c136857_g1_i1                | -                    | yes            |                                             | 1,159              | 580             | 20.58           |
|                                     | c30174_g1_i3                 | -                    | -              |                                             | 1,663              | 434             | 10.73           |
|                                     | c23191_g1_i1                 | -                    | yes            |                                             | 1,692              | 313             | 7.61            |
|                                     | c27364_g1_i1                 | -                    | -              |                                             | 1,296              | 215             | 6.82            |
|                                     | c35027_g1_i1                 | -                    | yes            |                                             | 1,689              | 98              | 2.39            |
|                                     | c29302_g2_i1                 | -                    | yes            |                                             | 1,937              | 104             | 2.21            |
|                                     | c7719_g1_i1                  | -                    | yes            |                                             | 646                | 28              | 1.78            |
|                                     | c1310_g1_i2                  | -                    | yes            |                                             | 1,641              | 61              | 1.53            |
|                                     | c29302_g1_i1                 | -                    | yes            |                                             | <b>1,580</b>       | <b>57</b>       | <b>1.48</b>     |
|                                     | c22705_g2_i1                 | -                    | yes            |                                             | <b>450</b>         | <b>4</b>        | <b>0.37</b>     |
|                                     | c169637_g1_i1                | -                    | -              |                                             | <b>278</b>         | <b>0</b>        | <b>0.00</b>     |
| <i>Total (high-support contigs)</i> |                              |                      |                | <b>11 / 14</b>                              |                    | <b>112,072</b>  | <b>4,299.37</b> |
| <b>Chitinase</b>                    | c29839_g1_i1                 | yes                  | yes            |                                             | 1,703              | 7,378,101       | 178,137.36      |
|                                     | c28694_g3_i1                 | yes                  | -              |                                             | 396                | 23,414          | 2,431.11        |
|                                     | c27030_g1_i1                 | yes                  | -              |                                             | 388                | 18,858          | 1,998.43        |
|                                     | c27884_g1_i1                 | yes                  | yes            |                                             | 424                | 17,222          | 1,670.10        |
|                                     | c136637_g1_i1                | -                    | yes            |                                             | 311                | 9,301           | 1,229.69        |
|                                     | c27030_g1_i2                 | yes                  | -              |                                             | 300                | 4,118           | 564.40          |
|                                     | c28694_g4_i1                 | yes                  | yes            |                                             | 563                | 2,471           | 180.46          |
|                                     | c28694_g2_i1                 | yes                  | -              |                                             | 238                | 467             | 80.68           |
|                                     | c82743_g1_i1                 | -                    | -              |                                             | 169                | 144             | 35.03           |
|                                     | c28638_g1_i4                 | -                    | yes            |                                             | 1,750              | 821             | 19.29           |
|                                     | c11884_g1_i1                 | -                    | yes            |                                             | 440                | 85              | 7.94            |
|                                     | c30124_g1_i1                 | -                    | -              |                                             | 1,796              | 320             | 7.33            |
|                                     | c12847_g1_i1                 | -                    | -              |                                             | 1,341              | 72              | 2.21            |
|                                     | c28694_g1_i1                 | -                    | -              |                                             | <b>233</b>         | <b>12</b>       | <b>2.12</b>     |
|                                     | c5675_g1_i1                  | -                    | -              |                                             | <b>1,109</b>       | <b>40</b>       | <b>1.48</b>     |
|                                     | c137531_g1_i1                | -                    | -              |                                             | <b>1,898</b>       | <b>39</b>       | <b>0.84</b>     |
|                                     | c62314_g1_i1                 | -                    | -              |                                             | <b>203</b>         | <b>4</b>        | <b>0.81</b>     |

|                                     |               |     |     |                |                  |                   |             |
|-------------------------------------|---------------|-----|-----|----------------|------------------|-------------------|-------------|
|                                     | c121850_g1_i1 | -   | yes |                | 633              | 8                 | 0.52        |
|                                     | c94882_g1_i1  | -   | yes |                | 326              | 4                 | 0.50        |
|                                     | c30447_g1_i1  | -   | -   |                | 1,206            | 3                 | 0.10        |
|                                     | c20352_g1_i1  | -   | yes |                | 157              | 0                 | 0.00        |
|                                     | c179482_g1_i1 | -   | -   |                | 262              | 0                 | 0.00        |
|                                     | c71366_g1_i1  | -   | -   |                | 142              | 0                 | 0.00        |
|                                     | c30754_g4_i1  | -   | -   |                | 246              | 0                 | 0.00        |
|                                     | c161994_g1_i1 | -   | -   |                | 173              | 0                 | 0.00        |
|                                     | c93866_g1_i1  | -   | -   |                | 163              | 0                 | 0.00        |
|                                     | c16904_g1_i1  | yes | -   |                | 225              | 0                 | 0.00        |
|                                     | c93564_g1_i1  | -   | -   |                | 185              | 0                 | 0.00        |
| <i>Total (high-support contigs)</i> |               |     |     | <b>13 / 28</b> | <b>7,455,394</b> | <b>186,364.04</b> |             |
| <b>Colipase-like</b>                | c26403_g1_i1  | -   | yes |                | 1,523            | 425               | 11.47       |
|                                     | c83533_g1_i1  | -   | -   |                | 632              | 6                 | 0.39        |
|                                     | c69394_g1_i1  | -   | -   |                | 255              | 0                 | 0.00        |
| <i>Total (high-support contigs)</i> |               |     |     | <b>1 / 3</b>   | <b>425</b>       | <b>11.47</b>      |             |
| <b>Cystatin</b>                     | c30119_g1_i1  | -   | yes | <b>1</b>       | 2,699            | <b>162</b>        | <b>2.47</b> |
| <b>Hyaluronidase</b>                | c28000_g2_i2  | -   | yes |                | 1,299            | 630               | 19.94       |
|                                     | c28000_g2_i1  | -   | yes |                | 1,299            | 347               | 10.98       |
|                                     | c26537_g1_i1  | -   | -   |                | 1,057            | 22                | 0.86        |
|                                     | c99311_g1_i1  | -   | -   |                | 491              | 8                 | 0.67        |
|                                     | c26537_g1_i2  | -   | yes |                | 477              | 7                 | 0.60        |
|                                     | c84753_g1_i1  | -   | -   |                | 587              | 7                 | 0.49        |
|                                     | c139045_g1_i1 | -   | yes |                | 196              | 0                 | 0.00        |
| <i>Total (high-support contigs)</i> |               |     |     | <b>2 / 7</b>   | <b>977</b>       | <b>30.93</b>      |             |
| <b>Kazal</b>                        | c28644_g2_i2  | -   | yes |                | 930              | 190               | 8.40        |
|                                     | c28848_g1_i2  | -   | -   |                | 1,797            | 333               | 7.62        |
|                                     | c28644_g2_i1  | -   | yes |                | 539              | 68                | 5.19        |
|                                     | c28699_g2_i1  | -   | -   |                | 1,988            | 203               | 4.20        |
|                                     | c28699_g2_i2  | -   | -   |                | 1,973            | 200               | 4.17        |
|                                     | c30818_g8_i1  | -   | -   |                | 2,855            | 238               | 3.43        |
|                                     | c10145_g1_i1  | -   | -   |                | 1,333            | 65                | 2.00        |
|                                     | c30818_g8_i2  | -   | -   |                | 1,667            | 79                | 1.95        |
|                                     | c60227_g1_i1  | -   | yes |                | 960              | 33                | 1.41        |
|                                     | c8461_g2_i1   | -   | -   |                | 1,381            | 40                | 1.19        |
|                                     | c22300_g1_i1  | -   | -   |                | 696              | 9                 | 0.53        |
|                                     | c36870_g1_i1  | -   | -   |                | 447              | 3                 | 0.28        |
| <i>Total (high-support contigs)</i> |               |     |     | <b>8 / 12</b>  | <b>1,376</b>     | <b>36.95</b>      |             |
| <b>Kunitz</b>                       | c26909_g1_i1  | -   | -   |                | 2,790            | 19,756            | 291.15      |
|                                     | c26026_g2_i2  | -   | -   |                | 1,815            | 482               | 10.92       |
|                                     | c21419_g1_i1  | -   | -   |                | 1,209            | 120               | 4.08        |
|                                     | c2037_g1_i1   | -   | -   |                | 1,527            | 111               | 2.99        |
|                                     | c115833_g1_i1 | -   | -   |                | 1,255            | 65                | 2.13        |
|                                     | c2789_g1_i1   | -   | yes |                | 548              | 23                | 1.73        |
|                                     | c92205_g1_i1  | -   | -   |                | 712              | 10                | 0.58        |
|                                     | c112161_g1_i1 | -   | -   |                | 745              | 9                 | 0.50        |
| <i>Total (high-support contigs)</i> |               |     |     | <b>5 / 8</b>   | <b>20,534</b>    | <b>311.27</b>     |             |
| <b>Lectin</b>                       | c72_g1_i1     | -   | -   |                | 1,469            | 82                | 2.30        |
|                                     | c4773_g1_i1   | -   | -   |                | 916              | 32                | 1.44        |
|                                     | c71342_g1_i1  | -   | -   |                | 471              | 15                | 1.31        |
|                                     | c31264_g1_i1  | -   | yes |                | 1,355            | 32                | 0.97        |
|                                     | c43104_g1_i1  | -   | -   |                | 1,067            | 7                 | 0.27        |
|                                     | c111380_g1_i1 | -   | -   |                | 411              | 2                 | 0.20        |

Supplementary Table 2

|                                     |               |     |     |               |                |                 |
|-------------------------------------|---------------|-----|-----|---------------|----------------|-----------------|
| <i>Total (high-support contigs)</i> |               |     |     | <b>2 / 6</b>  | <b>114</b>     | <b>3,73</b>     |
| <b>Metallopeptidase M12</b>         | c27520_g1_i1  | -   | yes | 1,507         | 145,668        | 3,974.44        |
|                                     | c28947_g1_i1  | -   | yes | 2,374         | 836            | 14.48           |
|                                     | c28592_g1_i2  | -   | yes | 1,231         | 311            | 10.39           |
|                                     | c28592_g1_i1  | -   | -   | 1,276         | 298            | 9.60            |
|                                     | c16469_g1_i2  | -   | -   | 1,868         | 173            | 3.81            |
|                                     | c16469_g1_i1  | -   | -   | 1,917         | 174            | 3.73            |
|                                     | c37943_g1_i1  | -   | -   | 1,061         | 47             | 1.82            |
|                                     | c23132_g1_i1  | -   | -   | 1,012         | 38             | 1.54            |
|                                     | c140847_g1_i1 | -   | -   | 1,232         | 26             | 0.87            |
|                                     | c61570_g1_i1  | -   | -   | 547           | 7              | 0.53            |
|                                     | c61957_g1_i1  | -   | yes | 432           | 5              | 0.48            |
|                                     | c46764_g1_i1  | -   | -   | 290           | 1              | 0.14            |
| <i>Total (high-support contigs)</i> |               |     |     | <b>8 / 12</b> | <b>147,545</b> | <b>4,019.82</b> |
| <b>Metallopeptidase M13</b>         | c27666_g1_i1  | -   | -   | 2,487         | 17,601         | 291.00          |
|                                     | c20542_g2_i1  | -   | -   | 1,700         | 37             | 0.89            |
|                                     | c89912_g1_i1  | -   | -   | 688           | 13             | 0.78            |
|                                     | c90181_g1_i1  | -   | -   | 815           | 14             | 0.71            |
|                                     | c112272_g1_i1 | -   | -   | 1,408         | 23             | 0.67            |
|                                     | c48921_g1_i1  | -   | -   | 156           | 2              | 0.53            |
| <i>Total (high-support contigs)</i> |               |     |     | <b>1 / 6</b>  | <b>17,601</b>  | <b>291.00</b>   |
| <b>Metallopeptidase M14</b>         | c24110_g1_i1  | yes | -   | 1,447         | 189,506        | 5,384.92        |
|                                     | c27520_g1_i1  | -   | -   | 1,507         | 145,668        | 3,974.44        |
|                                     | c27844_g2_i1  | -   | -   | 492           | 1,312          | 109.65          |
|                                     | c27232_g1_i1  | -   | yes | 398           | 686            | 70.87           |
|                                     | c8150_g1_i1   | -   | yes | 2,436         | 137            | 2.31            |
|                                     | c28686_g2_i1  | -   | -   | 1,401         | 47             | 1.38            |
|                                     | c12373_g1_i1  | -   | -   | 152           | 4              | 1.08            |
|                                     | c88597_g1_i1  | -   | -   | 220           | 4              | 0.75            |
|                                     | c137888_g1_i1 | -   | -   | 170           | 0              | 0.00            |
|                                     | c159732_g1_i1 | -   | -   | 159           | 0              | 0.00            |
| <i>Total (high-support contigs)</i> |               |     |     | <b>5 / 10</b> | <b>337,309</b> | <b>9,542.19</b> |
| <b>Peptidase S1</b>                 | c13598_g1_i1  | yes | yes | 1,205         | 775,049        | 26,446.44       |
|                                     | c29982_g1_i1  | yes | -   | 534           | 196,885        | 15,159.90       |
|                                     | c30148_g1_i1  | yes | yes | 1,140         | 364,870        | 13,160.07       |
|                                     | c27960_g1_i1  | yes | yes | 1,144         | 316,580        | 11,378.43       |
|                                     | c18283_g1_i1  | yes | -   | 1,179         | 286,704        | 9,998.73        |
|                                     | c29982_g4_i1  | yes | -   | 563           | 118,055        | 8,621.86        |
|                                     | c29091_g1_i2  | yes | yes | 1,100         | 216,342        | 8,086.73        |
|                                     | c27101_g1_i1  | yes | -   | 1,141         | 140,921        | 5,078.26        |
|                                     | c30148_g1_i2  | yes | yes | 1,147         | 139,510        | 5,001.12        |
|                                     | c30148_g1_i3  | yes | -   | 883           | 87,362         | 4,068.06        |
|                                     | c12686_g1_i1  | yes | -   | 1,200         | 103,249        | 3,537.77        |
|                                     | c28042_g1_i1  | yes | yes | 1,155         | 84,621         | 3,012.46        |
|                                     | c27162_g1_i1  | yes | -   | 313           | 21,533         | 2,828.69        |
|                                     | c29091_g1_i1  | yes | yes | 1,102         | 75,244         | 2,807.47        |
|                                     | c29982_g5_i1  | yes | -   | 447           | 29,390         | 2,703.44        |
|                                     | c23479_g2_i1  | yes | -   | 1,060         | 68,533         | 2,658.39        |
|                                     | c29090_g1_i1  | yes | yes | 2,238         | 140,303        | 2,577.70        |
|                                     | c29126_g1_i1  | yes | yes | 1,184         | 72,458         | 2,516.28        |
|                                     | c30416_g2_i1  | -   | yes | 1,898         | 82,423         | 1,785.57        |
|                                     | c30416_g2_i2  | -   | yes | 3,809         | 121,765        | 1,314.43        |
|                                     | c23479_g1_i1  | -   | -   | 453           | 9,314          | 845.40          |
|                                     | c29107_g2_i1  | -   | -   | 2,214         | 32,715         | 607.57          |

Supplementary Table 2

|               |     |     |       |        |        |
|---------------|-----|-----|-------|--------|--------|
| c13605_g1_i1  | -   | -   | 1,660 | 18,211 | 451.08 |
| c17559_g1_i1  | -   | -   | 1,939 | 12,556 | 266.26 |
| c21925_g2_i1  | -   | -   | 459   | 2,417  | 216.52 |
| c25966_g1_i1  | -   | -   | 831   | 3,766  | 186.34 |
| c20484_g1_i1  | -   | -   | 656   | 2,519  | 157.89 |
| c21925_g1_i1  | -   | -   | 323   | 857    | 109.09 |
| c28635_g1_i1  | -   | -   | 1,203 | 3,080  | 105.27 |
| c25966_g2_i1  | -   | -   | 438   | 1,015  | 95.28  |
| c29107_g1_i1  | -   | -   | 631   | 1,109  | 72.26  |
| c17402_g1_i1  | -   | -   | 2,191 | 2,822  | 52.96  |
| c26798_g1_i1  | -   | -   | 1,501 | 1,589  | 43.53  |
| c165131_g1_i1 | -   | -   | 369   | 310    | 34.54  |
| c25959_g2_i1  | -   | yes | 522   | 424    | 33.40  |
| c25117_g1_i1  | yes | -   | 403   | 301    | 30.71  |
| c27512_g1_i1  | -   | -   | 1,535 | 1,124  | 30.11  |
| c27512_g1_i2  | -   | -   | 1,525 | 1,088  | 29.33  |
| c29516_g1_i1  | -   | -   | 1,570 | 1,069  | 28.00  |
| c163284_g1_i1 | -   | -   | 1,774 | 1,156  | 26.79  |
| c18269_g1_i1  | -   | -   | 1,960 | 1,099  | 23.06  |
| c19800_g1_i1  | -   | -   | 1,609 | 857    | 21.90  |
| c25959_g1_i1  | -   | -   | 390   | 161    | 16.97  |
| c28636_g1_i1  | -   | -   | 1,626 | 511    | 12.92  |
| c26735_g1_i1  | -   | -   | 1,274 | 312    | 10.07  |
| c28049_g1_i1  | -   | -   | 1,051 | 235    | 9.19   |
| c21890_g2_i2  | -   | -   | 365   | 63     | 7.10   |
| c28624_g1_i1  | -   | -   | 1,964 | 301    | 6.30   |
| c24782_g2_i1  | -   | -   | 2,510 | 370    | 6.06   |
| c28572_g1_i1  | -   | -   | 1,648 | 242    | 6.04   |
| c28860_g1_i1  | -   | -   | 1,745 | 229    | 5.40   |
| c28049_g1_i2  | -   | -   | 1,280 | 165    | 5.30   |
| c29109_g1_i1  | -   | -   | 2,327 | 261    | 4.61   |
| c29328_g1_i1  | -   | -   | 2,864 | 279    | 4.01   |
| c16194_g1_i1  | -   | -   | 1,473 | 110    | 3.07   |
| c12858_g1_i1  | -   | -   | 241   | 13     | 2.22   |
| c25811_g1_i2  | -   | -   | 491   | 24     | 2.01   |
| c5375_g2_i1   | -   | -   | 738   | 26     | 1.45   |
| c165278_g1_i1 | -   | -   | 1,159 | 39     | 1.38   |
| c24933_g1_i2  | -   | -   | 1,751 | 56     | 1.32   |
| c90564_g1_i1  | -   | -   | 990   | 29     | 1.20   |
| c7375_g2_i1   | -   | -   | 1,534 | 32     | 0.86   |
| c5439_g1_i1   | -   | -   | 697   | 14     | 0.83   |
| c141669_g1_i1 | -   | -   | 767   | 13     | 0.70   |
| c9816_g1_i1   | -   | -   | 1,297 | 20     | 0.63   |
| c44711_g1_i1  | -   | -   | 458   | 7      | 0.63   |
| c99624_g1_i1  | -   | -   | 378   | 5      | 0.54   |
| c165090_g1_i1 | -   | -   | 1,079 | 13     | 0.50   |
| c37931_g1_i1  | -   | -   | 425   | 4      | 0.39   |
| c56449_g1_i1  | -   | -   | 861   | 8      | 0.38   |
| c166657_g1_i1 | -   | -   | 705   | 6      | 0.35   |
| c2392_g2_i1   | -   | -   | 486   | 4      | 0.34   |
| c11858_g1_i1  | -   | -   | 740   | 6      | 0.33   |
| c148556_g1_i1 | -   | -   | 686   | 5      | 0.30   |
| c96465_g1_i1  | -   | -   | 562   | 3      | 0.22   |
| c187364_g1_i1 | -   | -   | 314   | 1      | 0.13   |

Supplementary Table 2

|                                       |               |     |     |                |                  |                   |
|---------------------------------------|---------------|-----|-----|----------------|------------------|-------------------|
|                                       | c19937_g2_i1  | -   | yes | 336            | 1                | 0.12              |
|                                       | c134251_g1_i1 | -   | -   | 313            | 0                | 0.00              |
|                                       | c136336_g1_i1 | -   | -   | 193            | 0                | 0.00              |
|                                       | c136382_g1_i1 | -   | yes | 249            | 0                | 0.00              |
|                                       | c149051_g1_i1 | -   | yes | 256            | 0                | 0.00              |
|                                       | c162416_g1_i1 | -   | yes | 179            | 0                | 0.00              |
|                                       | c177612_g1_i1 | -   | yes | 326            | 0                | 0.00              |
|                                       | c182909_g1_i1 | -   | -   | 289            | 0                | 0.00              |
|                                       | c186243_g1_i1 | -   | -   | 141            | 0                | 0.00              |
|                                       | c187083_g1_i1 | -   | -   | 381            | 0                | 0.00              |
|                                       | c22296_g1_i1  | -   | -   | 404            | 0                | 0.00              |
|                                       | c52848_g3_i1  | -   | yes | 204            | 0                | 0.00              |
|                                       | c62183_g1_i1  | -   | -   | 368            | 0                | 0.00              |
|                                       | c73031_g1_i1  | -   | -   | 153            | 0                | 0.00              |
|                                       | c75035_g1_i1  | -   | -   | 168            | 0                | 0.00              |
|                                       | c81746_g1_i1  | -   | -   | 179            | 0                | 0.00              |
|                                       | c81784_g1_i1  | -   | -   | 159            | 0                | 0.00              |
|                                       | c82342_g1_i1  | -   | -   | 220            | 0                | 0.00              |
|                                       | c82379_g1_i1  | -   | -   | 340            | 0                | 0.00              |
|                                       | c84477_g1_i1  | -   | -   | 245            | 0                | 0.00              |
| <i>Total (high-support contigs)</i>   |               |     |     | <b>55 / 96</b> | <b>3,544,434</b> | <b>136,306.15</b> |
| <b>Peptidase S1 -<br/>LDLA domain</b> | c30675_g2_i3  | yes | yes | 1,795          | 1,612,752        | 36,942.66         |
|                                       | c30675_g2_i2  | yes | yes | 1,752          | 1,228,052        | 28,820.91         |
|                                       | c30675_g2_i4  | yes | -   | 1,508          | 933,783          | 25,460.66         |
|                                       | c30368_g1_i2  | yes | yes | 1,910          | 995,917          | 21,439.51         |
|                                       | c30368_g1_i3  | yes | yes | 1,480          | 615,193          | 17,091.29         |
|                                       | c25996_g1_i1  | yes | yes | 1,410          | 488,359          | 14,241.15         |
|                                       | c29982_g3_i1  | yes | yes | 1,222          | 381,583          | 12,839.34         |
|                                       | c30675_g2_i1  | yes | yes | 1,456          | 434,416          | 12,267.88         |
|                                       | c29982_g2_i1  | yes | yes | 1,128          | 191,528          | 6,981.49          |
|                                       | c27388_g1_i1  | yes | yes | 2,016          | 228,907          | 4,668.67          |
|                                       | c25446_g1_i4  | yes | -   | 288            | 14               | 2.00              |
| <i>Total (high-support contigs)</i>   |               |     |     | <b>10 / 11</b> | <b>7,110,490</b> | <b>180,753.57</b> |
| <b>Peptidase S10</b>                  | c29986_g1_i1  | -   | -   | 2,346          | 181,822          | 3,186.72          |
|                                       | c29849_g1_i1  | -   | -   | 3,440          | 512              | 6.12              |
|                                       | c29473_g5_i1  | -   | -   | 1,877          | 107              | 2.34              |
|                                       | c103962_g1_i1 | -   | -   | 183            | 2                | 0.45              |
| <i>Total (high-support contigs)</i>   |               |     |     | <b>3 / 4</b>   | <b>182,441</b>   | <b>3,195.18</b>   |
| <b>Phospholipase A2</b>               | c25267_g1_i1  | -   | yes | 1,787          | 152              | 3.50              |
|                                       | c26550_g1_i1  | -   | -   | 932            | 60               | 2.65              |
|                                       | c17764_g1_i1  | -   | yes | 1,612          | 38               | 0.97              |
|                                       | c1144_g1_i1   | -   | -   | 1,014          | 23               | 0.93              |
|                                       | c37684_g1_i1  | -   | -   | 259            | 0                | 0.00              |
| <i>Total (high-support contigs)</i>   |               |     |     | <b>2 / 5</b>   | <b>212</b>       | <b>6.15</b>       |
| <b>Serpín</b>                         | c26358_g2_i1  | -   | yes | 1,506          | 5,106            | 139.41            |
|                                       | c21812_g1_i1  | -   | yes | 1,612          | 72               | 1.84              |
|                                       | c17839_g1_i2  | -   | -   | 1,367          | 31               | 0.93              |
|                                       | c17839_g1_i1  | -   | -   | 1,821          | 38               | 0.86              |
|                                       | c156108_g1_i1 | -   | -   | 146            | 0                | 0.00              |
| <i>Total (high-support contigs)</i>   |               |     |     | <b>4 / 5</b>   | <b>5,178</b>     | <b>141.25</b>     |
| <b>Sphingomyelinase</b>               | c60968_g1_i1  | -   | yes | 1,224          | 33               | 1.11              |
|                                       | c88623_g1_i1  | -   | -   | 851            | 22               | 1.06              |
|                                       | c88354_g1_i1  | -   | -   | 837            | 3                | 0.15              |

Supplementary Table 2



|                               |                              |     |     |       |           |           |           |
|-------------------------------|------------------------------|-----|-----|-------|-----------|-----------|-----------|
| Total (high-support contigs)  |                              |     |     | 0 / 3 | 33        | 1.11      |           |
| VEGF-like                     | c29360_g3_i1                 | yes | yes | 1,609 | 234,789   | 5,999.94  |           |
|                               | c26353_g1_i1                 | -   | yes | 2,323 | 1,095     | 19.38     |           |
|                               | c28217_g1_i2                 | -   | yes | 2,457 | 234       | 3.92      |           |
|                               | c28217_g1_i1                 | -   | yes | 2,481 | 236       | 3.91      |           |
|                               | c17785_g1_i2                 | -   | yes | 1,041 | 37        | 1.46      |           |
|                               | c113445_g1_i1                | -   | -   | 968   | 22        | 0.93      |           |
|                               | c90144_g1_i1                 | -   | yes | 972   | 13        | 0.55      |           |
|                               | c182771_g1_i1                | -   | -   | 260   | 0         | 0.00      |           |
| Total (high-support contigs)  |                              |     |     | 4 / 8 | 236,354   | 6,027.15  |           |
| Xibalbin 1 (ICK)              | c27367_g1_i1                 | yes | yes | 728   | 126,395   | 7,138.77  |           |
| Total (high-support contigs)  |                              |     |     | 1 / 1 | 126,395   | 7,138.77  |           |
| Xibalbin 2<br>(putative ICK)  | c29772_g1_i1                 | yes | yes | 773   | 1,412,448 | 75,130.80 |           |
|                               | c149924_g1_i1                | -   | yes | 584   | 12        | 0.84      |           |
|                               | c27396_g1_i1                 | -   | yes | 354   | 0         | 0.00      |           |
|                               | c27396_g1_i2                 | -   | -   | 293   | 0         | 0.00      |           |
|                               | c103283_g1_i1                | -   | -   | 158   | 0         | 0.00      |           |
|                               | c108798_g1_i1                | -   | -   | 181   | 0         | 0.00      |           |
|                               | Total (high-support contigs) |     |     |       | 1 / 6     | 1,412,448 | 75,130.80 |
| Xibalbin 3<br>(dICK)          | c9387_g1_i1                  | yes | yes | 790   | 145,444   | 7,569.96  |           |
|                               | c29843_g1_i2                 | yes | yes | 1,640 | 151,439   | 3,796.81  |           |
|                               | c27340_g3_i1                 | -   | -   | 328   | 116       | 14.54     |           |
|                               | c27303_g1_i2                 | -   | yes | 588   | 124       | 8.67      |           |
|                               | c27303_g1_i3                 | -   | yes | 909   | 130       | 5.88      |           |
|                               | c27303_g1_i1                 | -   | yes | 328   | 11        | 1.38      |           |
|                               | Total (high-support contigs) |     |     |       | 5 / 6     | 297,253   | 11,395.87 |
| Xibalbin 4<br>(putative CSab) | c18306_g1_i1                 | yes | yes | 781   | 324,301   | 17,073.49 |           |
|                               | c26085_g1_i1                 | -   | yes | 1070  | 3,633     | 139.61    |           |
|                               | c26882_g2_i1                 | -   | yes | 1,062 | 2,458     | 95.17     |           |
|                               | c30070_g1_i1                 | -   | yes | 737   | 288       | 16.07     |           |
|                               | c30070_g1_i2                 | -   | yes | 1,535 | 258       | 6.91      |           |
|                               | c5499_g1_i1                  | -   | yes | 818   | 79        | 3.97      |           |
|                               | Total (high-support contigs) |     |     |       | 6 / 6     | 331,017   | 17,335.21 |
| Xibalbin 5<br>(putative CSab) | c28491_g1_i1                 | yes | yes | 647   | 17,940    | 1,140.10  |           |
|                               | c74570_g1_i1                 | -   | -   | 297   | 2         | 0.28      |           |
| Total (high-support contigs)  |                              |     |     | 1 / 2 | 17,940    | 1,140.10  |           |
| Xibalbin 6 (CHH/ITP)          | c13591_g1_i1                 | yes | -   | 1     | 1,321     | 3,443     | 107.17    |
| Xibalbin 7<br>(sIGFBP-rp)     | c13811_g1_i2                 | -   | yes | 632   | 55        | 3.58      |           |
|                               | c25812_g1_i1                 | -   | yes | 1,601 | 131       | 3.36      |           |
|                               | c13811_g1_i1                 | -   | yes | 601   | 46        | 3.15      |           |
|                               | c26493_g1_i3                 | -   | yes | 1,692 | 123       | 2.99      |           |
|                               | c23977_g2_i2                 | yes | yes | 665   | 23        | 1.42      |           |
|                               | c26493_g1_i2                 | -   | yes | 890   | 22        | 1.02      |           |
|                               | c23977_g2_i1                 | yes | yes | 687   | 9         | 0.54      |           |
|                               | Total (high-support contigs) |     |     |       | 4 / 7     | 355       | 13.08     |
| Xibalbin 8<br>(Unknown 1)     | c23843_g2_i1                 | yes | yes | 684   | 708       | 42.56     |           |
|                               | c77249_g1_i1                 | -   | yes | 301   | 1         | 0.14      |           |
| Total (high-support contigs)  |                              |     |     | 1 / 2 | 708       | 42.56     |           |
| Xibalbin 09<br>(Unknown 2)    | c23666_g1_i1                 | yes | yes | 1     | 887       | 524,955   | 24,334.56 |
| Xibalbin 10<br>(Unknown 3)    | c25771_g1_i2                 | yes | yes | 566   | 329,600   | 23,943.95 |           |
|                               | c25771_g1_i1                 | -   | yes | 545   | 180,730   | 13,635.11 |           |
| Total (high-support contigs)  |                              |     |     | 2 / 2 | 510,330   | 37,579.07 |           |

Supplementary Table 2



|                                                                      |              |     |     |              |                |                  |
|----------------------------------------------------------------------|--------------|-----|-----|--------------|----------------|------------------|
| <b>Xibalbin 11</b><br><b>(putative linear two-domain transcript)</b> | c29407_g1_i2 | yes | yes | 715          | 564,966        | 32,489.37        |
|                                                                      | c29407_g1_i1 | yes | yes | 1,028        | 345,028        | 13,800.23        |
|                                                                      | c27729_g1_i1 | -   | yes | 698          | 32,169         | 1,894.99         |
|                                                                      | c27729_g1_i2 | -   | yes | 778          | 6,300          | 332.96           |
| <i>Total (high-support contigs)</i>                                  |              |     |     | <b>4 / 4</b> | <b>948,463</b> | <b>48,517.55</b> |
| <b>Xibalbin 12</b><br><b>(Unknown)</b>                               | c27075_g1_i1 | -   | yes | 411          | 20,417         | 2,042.56         |
|                                                                      | c27075_g1_i2 | -   | yes | 339          | 14,112         | 1,711.65         |
| <i>Total (high-support contigs)</i>                                  |              |     |     | <b>2 / 2</b> | <b>34,529</b>  | <b>3,754.21</b>  |
| <b>Xibalbin 13</b><br><b>(ICK)</b>                                   | c29168_g1_i2 | -   | yes | 1,966        | 597            | 12.49            |
|                                                                      | c29168_g1_i1 | -   | yes | 2,050        | 519            | 10.41            |
| <i>Total (high-support contigs)</i>                                  |              |     |     | <b>2 / 2</b> | <b>4,016</b>   | <b>22.90</b>     |

**Supplementary Table 3: Whole body transcriptomics**

| Name of toxin protein family | ID of putative toxin contigs | Signal Peptide | Number of high-support contigs (reads > 25) | Lengths of contigs | Number of reads | FPKM             |
|------------------------------|------------------------------|----------------|---------------------------------------------|--------------------|-----------------|------------------|
| <b>C1-like domain</b>        | c68643_g1_i1                 | yes            |                                             | 1,071              | 84              | 8.64             |
|                              | c31704_g1_i1                 | yes            |                                             | 1,198              | 46              | 4.23             |
|                              | c156732_g1_i1                | yes            |                                             | 537                | 16              | 3.28             |
| <i>Total</i>                 |                              |                | <b>2 / 3</b>                                |                    | <b>130</b>      | <b>12.86</b>     |
| <b>Calycin</b>               | c42271_g1_i1                 | yes            |                                             | 733                | 25,283          | 3,797.90         |
|                              | c39523_g1_i2                 | yes            |                                             | 1,110              | 10,189          | 1,010.71         |
|                              | c37020_g1_i1                 | yes            |                                             | 906                | 8,303           | 1,009.08         |
|                              | c41349_g4_i2                 | yes            |                                             | 1,570              | 10,951          | 768.02           |
|                              | c39523_g1_i1                 | yes            |                                             | 938                | 5,923           | 695.28           |
|                              | c1872_g1_i1                  | yes            |                                             | 2,642              | 12,459          | 519.24           |
|                              | c40613_g2_i1                 | yes            |                                             | 775                | 3,498           | 496.98           |
|                              | c14409_g1_i1                 | yes            |                                             | 741                | 2,921           | 434.04           |
|                              | c39556_g2_i2                 | yes            |                                             | 881                | 1,665           | 208.09           |
|                              | c1964_g1_i1                  | yes            |                                             | 1,001              | 1,794           | 197.34           |
|                              | c38227_g1_i1                 | yes            |                                             | 1,544              | 2,316           | 165.16           |
|                              | c40613_g1_i1                 | yes            |                                             | 1,435              | 1,960           | 150.39           |
|                              | c29444_g2_i2                 | yes            |                                             | 656                | 829             | 139.15           |
|                              | c38916_g1_i1                 | yes            |                                             | 2,725              | 1,960           | 79.20            |
|                              | c38227_g1_i4                 | yes            |                                             | 390                | 276             | 77.92            |
|                              | c30222_g1_i2                 | yes            |                                             | 1,169              | 534             | 50.30            |
|                              | c40953_g3_i1                 | yes            |                                             | 1,971              | 855             | 47.76            |
|                              | c39950_g3_i1                 | yes            |                                             | 980                | 268             | 30.11            |
|                              | c30968_g2_i1                 | yes            |                                             | 1,153              | 309             | 29.51            |
|                              | c38227_g1_i3                 | -              |                                             | 1,031              | 276             | 29.48            |
|                              | c33342_g1_i1                 | yes            |                                             | 986                | 260             | 29.03            |
|                              | c28551_g1_i1                 | yes            |                                             | 784                | 118             | 16.57            |
|                              | c39950_g4_i1                 | yes            |                                             | 2,120              | 314             | 16.31            |
|                              | c43200_g1_i1                 | yes            |                                             | 659                | 59              | 9.86             |
|                              | c43013_g1_i1                 | yes            |                                             | 1,112              | 89              | 8.81             |
|                              | c33878_g1_i1                 | yes            |                                             | 616                | 32              | 5.72             |
|                              | c6754_g1_i1                  | -              |                                             | 637                | 30              | 5.19             |
|                              | c56731_g1_i1                 | -              |                                             | 267                | 9               | 3.71             |
|                              | c163658_g1_i1                | -              |                                             | 284                | 8               | 3.10             |
|                              | c98630_g1_i1                 | yes            |                                             | 762                | 20              | 2.89             |
|                              | c153149_g1_i1                | yes            |                                             | 276                | 6               | 2.39             |
|                              | c79065_g1_i1                 | -              |                                             | 273                | 4               | 1.61             |
| <i>Total</i>                 |                              |                | <b>27 / 32</b>                              |                    | <b>93,471</b>   | <b>10,027.14</b> |
| <b>CAP</b>                   | c39648_g1_i1                 | yes            |                                             | 1,398              | 8,621           | 679.00           |
|                              | c39316_g1_i1                 | yes            |                                             | 2,531              | 7,693           | 334.67           |
|                              | c36696_g1_i1                 | yes            |                                             | 1,533              | 946             | 67.95            |
|                              | c19356_g1_i1                 | yes            |                                             | 1,588              | 829             | 57.48            |
|                              | c40495_g1_i2                 | -              |                                             | 1,427              | 609             | 46.99            |
|                              | c35351_g1_i1                 | yes            |                                             | 967                | 290             | 33.02            |
|                              | c30140_g1_i2                 | yes            |                                             | 1,371              | 139             | 11.16            |
|                              | c29338_g1_i1                 | -              |                                             | 871                | 77              | 9.73             |

|                      |               |     |                |               |                 |
|----------------------|---------------|-----|----------------|---------------|-----------------|
|                      | c39513_g1_i1  | yes | 1,743          | 147           | 9.29            |
|                      | c105183_g1_i1 | -   | 948            | 49            | 5.69            |
|                      | c120579_g1_i1 | yes | 674            | 20            | 3.27            |
|                      | c179430_g1_i1 | -   | 286            | 8             | 3.08            |
|                      | c185465_g1_i1 | -   | 286            | 5             | 1.92            |
|                      | c101573_g1_i1 | -   | 495            | 6             | 1.33            |
| <i>Total</i>         |               |     | <b>10 / 14</b> | <b>19,400</b> | <b>1,254.99</b> |
| <b>Chitinase</b>     | c39564_g1_i1  | yes | 1,962          | 47,087        | 2,642.53        |
|                      | c33934_g1_i1  | yes | 2,060          | 18,169        | 971.14          |
|                      | c40224_g1_i1  | yes | 2,314          | 801           | 38.11           |
|                      | c40216_g2_i1  | yes | 1,607          | 466           | 31.93           |
|                      | c37725_g1_i1  | yes | 2,184          | 484           | 24.40           |
|                      | c1616_g1_i1   | yes | 1,652          | 224           | 14.93           |
|                      | c34447_g2_i1  | -   | 661            | 56            | 9.33            |
|                      | c34447_g1_i1  | -   | 937            | 41            | 4.82            |
|                      | c127858_g1_i1 | -   | 299            | 8             | 2.95            |
| <i>Total</i>         |               |     | <b>8 / 9</b>   | <b>67,328</b> | <b>3,737.20</b> |
| <b>Colipase-like</b> | c96280_g1_i1  | yes | 926            | 1,144         | 136.03          |
|                      | c126351_g1_i1 | yes | 834            | 60            | 7.92            |
|                      | c98001_g1_i1  | yes | 1,359          | 69            | 5.59            |
|                      | c127271_g1_i1 | yes | 694            | 26            | 4.13            |
| <i>Total</i>         |               |     | <b>4 / 4</b>   | <b>1,299</b>  | <b>153.67</b>   |
| <b>Cystatin</b>      | c37574_g1_i1  | -   | 2,700          | 1,065         | 43.43           |
|                      | c8661_g1_i1   | -   | 2,206          | 105           | 5.24            |
|                      | c99564_g1_i1  | -   | 1,091          | 36            | 3.63            |
|                      | c77886_g1_i1  | -   | 150            | 0             | 0.00            |
| <i>Total</i>         |               |     | <b>3 / 4</b>   | <b>1,206</b>  | <b>52.31</b>    |
| <b>Hyaluronidase</b> | c40379_g1_i2  | yes | 1,184          | 151           | 14.04           |
|                      | c31967_g2_i1  | yes | 1,211          | 119           | 10.82           |
|                      | c40379_g1_i1  | yes | 1,284          | 102           | 8.75            |
|                      | c28820_g1_i1  | yes | 264            | 9             | 3.75            |
|                      | c47494_g1_i1  | -   | 366            | 8             | 2.41            |
|                      | c43222_g1_i1  | -   | 400            | 6             | 1.65            |
|                      | c111275_g1_i1 | -   | 332            | 4             | 1.33            |
| <i>Total</i>         |               |     | <b>3 / 7</b>   | <b>372</b>    | <b>33.61</b>    |
| <b>Kazal</b>         | c40841_g1_i1  | -   | 652            | 5,084         | 858.57          |
|                      | c40841_g2_i1  | -   | 1,681          | 12,103        | 792.76          |
|                      | c40674_g1_i1  | -   | 546            | 2,965         | 597.93          |
|                      | c73313_g1_i1  | yes | 774            | 1,436         | 204.28          |
|                      | c38149_g1_i1  | yes | 1,001          | 1,409         | 154.99          |
|                      | c38149_g1_i2  | yes | 957            | 833           | 95.84           |
|                      | c37585_g1_i2  | -   | 1,534          | 549           | 39.41           |
|                      | c40913_g3_i1  | -   | 3,085          | 755           | 26.95           |
|                      | c40913_g3_i2  | -   | 2,595          | 509           | 21.60           |
|                      | c29394_g1_i1  | yes | 1,365          | 201           | 16.21           |
|                      | c151081_g1_i1 | -   | 826            | 66            | 8.80            |
|                      | c113609_g1_i1 | yes | 344            | 8             | 2.56            |
|                      | c13750_g2_i1  | -   | 618            | 13            | 2.32            |
|                      | c8253_g2_i1   | -   | 717            | 13            | 2.00            |
|                      | c95379_g1_i1  | yes | 407            | 6             | 1.62            |
|                      | c69644_g1_i1  | -   | 293            | 3             | 1.13            |

Supplementary Table 3

| <i>Total</i>  |               |     | <b>11 / 16</b> | <b>25,910</b> | <b>2,817.34</b> |
|---------------|---------------|-----|----------------|---------------|-----------------|
| <b>Kunitz</b> | c41394_g2_i1  | -   | 6,022          | 13,902        | 254.19          |
|               | c39736_g1_i1  | -   | 2,724          | 2,103         | 85.01           |
|               | c36647_g1_i1  | -   | 1,175          | 901           | 84.43           |
|               | c40229_g1_i1  | -   | 3,064          | 1,703         | 61.20           |
|               | c39884_g2_i1  | -   | 2,615          | 942           | 39.66           |
|               | c40838_g1_i2  | -   | 3,230          | 1,016         | 34.63           |
|               | c40838_g1_i1  | -   | 3,240          | 1,002         | 34.05           |
|               | c40913_g3_i1  | -   | 3,085          | 755           | 26.95           |
|               | c40883_g1_i1  | -   | 3,576          | 741           | 22.82           |
|               | c40913_g3_i2  | -   | 2,595          | 509           | 21.60           |
|               | c37109_g1_i2  | -   | 2,559          | 206           | 8.86            |
|               | c6455_g1_i1   | -   | 1,089          | 82            | 8.29            |
|               | c17588_g1_i1  | yes | 2,247          | 120           | 5.88            |
|               | c99819_g1_i1  | -   | 680            | 23            | 3.72            |
|               | c43688_g1_i1  | -   | 1,297          | 43            | 3.65            |
|               | c175170_g1_i1 | -   | 906            | 27            | 3.28            |
|               | c149176_g1_i1 | -   | 1,191          | 35            | 3.24            |
|               | c31027_g3_i1  | -   | 534            | 11            | 2.27            |
|               | c124181_g1_i1 | yes | 454            | 5             | 1.21            |
| <i>Total</i>  |               |     | <b>16 / 19</b> | <b>24,087</b> | <b>697.74</b>   |
| <b>Lectin</b> | c3306_g1_i1   | yes | 1,020          | 11,353        | 1,225.54        |
|               | c38034_g1_i2  | yes | 903            | 7,367         | 898.30          |
|               | c38034_g1_i1  | -   | 720            | 5,185         | 792.93          |
|               | c41421_g5_i2  | -   | 2,744          | 14,360        | 576.22          |
|               | c33884_g1_i1  | -   | 1,899          | 6,806         | 394.63          |
|               | c121397_g1_i1 | -   | 1,474          | 770           | 57.52           |
|               | c39626_g1_i1  | yes | 1,482          | 261           | 19.39           |
|               | c41669_g1_i1  | -   | 1,665          | 238           | 15.74           |
|               | c40169_g2_i1  | -   | 1,149          | 142           | 13.61           |
|               | c34169_g1_i1  | -   | 914            | 95            | 11.44           |
|               | c146039_g1_i1 | -   | 1,111          | 110           | 10.90           |
|               | c173595_g1_i1 | -   | 3,140          | 202           | 7.08            |
|               | c40169_g1_i1  | -   | 1,082          | 60            | 6.11            |
|               | c23063_g1_i2  | -   | 769            | 41            | 5.87            |
|               | c69970_g1_i1  | yes | 1,261          | 64            | 5.59            |
|               | c38285_g1_i1  | -   | 1,897          | 92            | 5.34            |
|               | c174585_g1_i1 | -   | 481            | 22            | 5.04            |
|               | c6021_g1_i1   | -   | 457            | 20            | 4.82            |
|               | c80582_g1_i1  | -   | 466            | 20            | 4.73            |
|               | c31371_g3_i1  | -   | 405            | 17            | 4.62            |
|               | c44412_g1_i1  | -   | 687            | 27            | 4.33            |
|               | c45488_g1_i1  | -   | 695            | 27            | 4.28            |
|               | c31371_g1_i1  | -   | 417            | 15            | 3.96            |
|               | c146790_g1_i1 | yes | 582            | 20            | 3.78            |
|               | c23063_g1_i1  | -   | 732            | 25            | 3.76            |
|               | c46549_g1_i1  | -   | 431            | 14            | 3.58            |
|               | c121773_g1_i1 | -   | 436            | 14            | 3.54            |
|               | c31738_g2_i1  | -   | 287            | 9             | 3.45            |
|               | c32349_g1_i1  | -   | 417            | 13            | 3.43            |
|               | c95417_g1_i1  | -   | 882            | 22            | 2.75            |

Supplementary Table 3

|                             |               |     |                |               |                 |
|-----------------------------|---------------|-----|----------------|---------------|-----------------|
|                             | c31371_g2_il  | -   | 322            | 8             | 2.74            |
|                             | c122717_g1_il | -   | 728            | 17            | 2.57            |
|                             | c174091_g1_il | -   | 372            | 8             | 2.37            |
|                             | c147606_g1_il | -   | 1,008          | 21            | 2.29            |
|                             | c12041_g1_il  | -   | 918            | 19            | 2.28            |
|                             | c12041_g1_il  | -   | 918            | 19            | 2.28            |
|                             | c32349_g2_il  | -   | 306            | 6             | 2.16            |
|                             | c46354_g1_il  | -   | 469            | 9             | 2.11            |
|                             | c111370_g1_il | yes | 433            | 8             | 2.03            |
|                             | c121716_g1_il | -   | 715            | 13            | 2.00            |
|                             | c114781_g1_il | -   | 351            | 6             | 1.88            |
|                             | c148179_g1_il | -   | 247            | 4             | 1.78            |
|                             | c55614_g1_il  | -   | 262            | 4             | 1.68            |
|                             | c183385_g1_il | -   | 334            | 5             | 1.65            |
|                             | c125283_g1_il | -   | 271            | 4             | 1.63            |
|                             | c105897_g1_il | -   | 475            | 7             | 1.62            |
|                             | c95339_g1_il  | -   | 277            | 4             | 1.59            |
|                             | c25755_g1_il  | -   | 208            | 3             | 1.59            |
|                             | c15023_g1_il  | -   | 169            | 2             | 1.30            |
|                             | c100372_g1_il | -   | 234            | 2             | 0.94            |
|                             | c18393_g1_il  | -   | 187            | 0             | 0.00            |
| <i>Total</i>                |               |     | <b>19 / 51</b> | <b>47,225</b> | <b>4,058.58</b> |
| <b>Metallopeptidase M12</b> | c38819_g1_il  | yes | 1,853          | 11,265        | 669.38          |
|                             | c40821_g1_i3  | yes | 1,859          | 4,370         | 258.83          |
|                             | c40821_g1_i2  | yes | 1,829          | 4,281         | 257.72          |
|                             | c40821_g1_il  | yes | 1,790          | 4,056         | 249.50          |
|                             | c39128_g1_il  | yes | 2,799          | 5,379         | 211.60          |
|                             | c38245_g1_il  | yes | 1,518          | 1,950         | 141.44          |
|                             | c38587_g1_il  | yes |                | 834           | 106.90          |
|                             | c36638_g2_il  | -   | 672            | 596           | 97.66           |
|                             | c29881_g1_il  | yes | 1,101          | 626           | 62.60           |
|                             | c39901_g1_il  | yes | 3,065          | 1,633         | 58.66           |
|                             | c29881_g1_i2  | -   | 1,245          | 622           | 55.01           |
|                             | c7262_g1_il   | yes | 1,914          | 595           | 34.23           |
|                             | c38943_g1_i3  | -   | 4,882          | 1,201         | 27.09           |
|                             | c38943_g1_i2  | -   | 4,894          | 1,149         | 25.85           |
|                             | c38192_g1_il  | -   | 2,134          | 131           | 6.76            |
|                             | c125508_g1_il | yes | 1,258          | 69            | 6.04            |
|                             | c20701_g1_il  | -   | 787            | 30            | 4.20            |
|                             | c6166_g1_il   | -   | 1,485          | 54            | 4.00            |
|                             | c5983_g1_il   | -   | 589            | 12            | 2.24            |
|                             | c38192_g2_il  | yes | 624            | 11            | 1.94            |
|                             | c134572_g1_il | -   | 479            | 8             | 1.84            |
|                             | c48691_g1_il  | -   | 360            | 6             | 1.84            |
|                             | c156237_g1_il | -   | 434            | 7             | 1.78            |
|                             | c51615_g1_il  | yes | 400            | 6             | 1.65            |
|                             | c143471_g1_il | -   | 215            | 3             | 1.54            |
| <i>Total</i>                |               |     | <b>19 / 25</b> | <b>38,853</b> | <b>2,279.72</b> |
| <b>Metallopeptidase M13</b> | c40941_g3_il  | yes | 3,871          | 2,596         | 73.84           |
|                             | c38812_g2_il  | -   | 3,652          | 434           | 13.09           |
|                             | c38809_g1_il  | -   | 747            | 129           | 19.01           |

Supplementary Table 3

|                             |               |     |               |              |               |
|-----------------------------|---------------|-----|---------------|--------------|---------------|
|                             | c38809_g2_i1  | -   | 2,276         | 320          | 15.48         |
|                             | c36771_g1_i1  | -   | 2,751         | 219          | 8.77          |
|                             | c96701_g1_i1  | -   | 1,994         | 147          | 8.12          |
|                             | c28676_g1_i1  | -   | 2,181         | 108          | 5.45          |
|                             | c158946_g1_i1 | -   | 243           | 7            | 3.17          |
|                             | c120779_g1_i1 | -   | 709           | 18           | 2.80          |
|                             | c121332_g1_i1 | -   | 643           | 16           | 2.74          |
|                             | c122940_g1_i1 | -   | 600           | 13           | 2.39          |
|                             | c80464_g1_i1  | -   | 505           | 9            | 1.96          |
|                             | c29581_g3_i1  | -   | 408           | 7            | 1.89          |
|                             | c140065_g1_i1 | -   | 464           | 7            | 1.66          |
|                             | c137305_g1_i1 | -   | 272           | 4            | 1.62          |
|                             | c11088_g1_i1  | -   | 445           | 6            | 1.48          |
|                             | c147180_g1_i1 | -   | 310           | 4            | 1.42          |
|                             | c89109_g1_i1  | -   | 286           | 3            | 1.15          |
|                             | c22820_g1_i1  | -   | 151           | 1            | 0.73          |
|                             | c29581_g2_i1  | -   | 196           | 1            | 0.56          |
|                             | c22820_g2_i1  | -   | 198           | 1            | 0.56          |
| <i>Total</i>                |               |     | <b>8 / 21</b> | <b>3,966</b> | <b>146.14</b> |
| <b>Metallopeptidase M14</b> | c39004_g1_i2  | -   | 1,365         | 2,573        | 207.55        |
|                             | c96470_g1_i1  | -   | 1,804         | 2,962        | 180.79        |
|                             | c39046_g1_i1  | -   | 4,531         | 622          | 15.12         |
|                             | c34863_g1_i2  | yes | 3,109         | 229          | 8.11          |
|                             | c29585_g1_i1  | -   | 832           | 54           | 7.15          |
|                             | c125508_g1_i1 | -   | 1,258         | 69           | 6.04          |
|                             | c74890_g1_i1  | -   | 725           | 28           | 4.25          |
|                             | c7622_g1_i1   | -   | 317           | 10           | 3.47          |
|                             | c151706_g1_i1 | -   | 260           | 7            | 2.96          |
|                             | c72727_g1_i1  | -   | 351           | 9            | 2.82          |
|                             | c85284_g1_i1  | -   | 253           | 6            | 2.61          |
|                             | c43522_g1_i1  | -   | 344           | 6            | 1.92          |
|                             | c48691_g1_i1  | -   | 360           | 6            | 1.84          |
|                             | c69660_g1_i1  | -   | 399           | 6            | 1.66          |
|                             | c107555_g1_i1 | yes | 203           | 0            | 0.00          |
| <i>Total</i>                |               |     | <b>7 / 15</b> | <b>6,537</b> | <b>429.00</b> |
| <b>Peptidase S1</b>         | c40947_g1_i1  | -   | 908           | 26,544       | 3,218.84      |
|                             | c40947_g1_i2  | -   | 916           | 20,101       | 2,416.24      |
|                             | c35347_g1_i1  | -   | 981           | 17,078       | 1,916.84      |
|                             | c40947_g1_i3  | -   | 1,324         | 17,711       | 1,472.90      |
|                             | c34883_g1_i1  | -   | 994           | 13,011       | 1,441.26      |
|                             | c36169_g1_i1  | -   | 1,422         | 16,211       | 1,255.25      |
|                             | c29879_g1_i1  | -   | 1,522         | 6,271        | 453.67        |
|                             | c39087_g1_i1  | -   | 1,009         | 3,208        | 350.08        |
|                             | c6983_g1_i1   | -   | 1,657         | 3,013        | 200.21        |
|                             | c40600_g1_i1  | -   | 3,335         | 5,274        | 174.13        |
|                             | c41381_g1_i2  | -   | 2,480         | 3,839        | 170.45        |
|                             | c41381_g1_i6  | -   | 2,521         | 3,764        | 164.40        |
|                             | c41381_g1_i9  | -   | 2,484         | 3,685        | 163.34        |
|                             | c28486_g1_i1  | -   | 1,098         | 1,517        | 152.13        |
|                             | c40236_g1_i1  | -   | 1,698         | 1,860        | 120.61        |
|                             | c29237_g1_i1  | -   | 1,203         | 1,309        | 119.81        |

Supplementary Table 3

|               |   |       |       |       |
|---------------|---|-------|-------|-------|
| c40789_g1_i2  | - | 2,474 | 1,759 | 78.29 |
| c40789_g1_i1  | - | 2,516 | 1,698 | 74.31 |
| c38949_g1_i1  | - | 1,486 | 932   | 69.06 |
| c13708_g1_i2  | - | 1,180 | 678   | 63.27 |
| c7080_g1_i1   | - | 1,076 | 482   | 49.32 |
| c13708_g1_i1  | - | 1,305 | 549   | 46.32 |
| c39677_g1_i1  | - | 2,028 | 828   | 44.96 |
| c31947_g1_i1  | - | 1,492 | 472   | 34.83 |
| c27166_g1_i1  | - | 1,619 | 509   | 34.62 |
| c38902_g1_i1  | - | 1,516 | 411   | 29.85 |
| c39596_g1_i2  | - | 2,554 | 596   | 25.69 |
| c120886_g1_i1 | - | 1,683 | 363   | 23.75 |
| c8457_g1_i1   | - | 1,469 | 316   | 23.69 |
| c39309_g1_i2  | - | 1,098 | 230   | 23.06 |
| c41290_g3_i2  | - | 3,125 | 642   | 22.62 |
| c37720_g1_i1  | - | 598   | 116   | 21.36 |
| c39596_g1_i1  | - | 2,347 | 441   | 20.69 |
| c34483_g1_i1  | - | 958   | 172   | 19.77 |
| c37726_g1_i1  | - | 1,490 | 260   | 19.21 |
| c37726_g1_i2  | - | 1,660 | 286   | 18.97 |
| c37720_g3_i1  | - | 861   | 115   | 14.71 |
| c41290_g2_i3  | - | 2,285 | 252   | 12.14 |
| c7293_g1_i1   | - | 665   | 71    | 11.76 |
| c37720_g3_i2  | - | 1,131 | 116   | 11.29 |
| c8665_g1_i1   | - | 933   | 88    | 10.39 |
| c32126_g1_i1  | - | 1,186 | 71    | 6.59  |
| c7293_g2_i1   | - | 219   | 13    | 6.54  |
| c25679_g1_i1  | - | 1,196 | 67    | 6.17  |
| c15885_g1_i2  | - | 1,440 | 76    | 5.81  |
| c15885_g1_i1  | - | 1,404 | 70    | 5.49  |
| c6924_g1_i1   | - | 828   | 40    | 5.32  |
| c134148_g1_i1 | - | 562   | 25    | 4.90  |
| c41290_g1_i1  | - | 452   | 20    | 4.87  |
| c145247_g1_i1 | - | 1,424 | 63    | 4.87  |
| c37495_g2_i1  | - | 389   | 17    | 4.81  |
| c10276_g2_i1  | - | 507   | 22    | 4.78  |
| c35609_g2_i1  | - | 595   | 25    | 4.63  |
| c122699_g1_i1 | - | 765   | 31    | 4.46  |
| c14123_g1_i1  | - | 374   | 15    | 4.42  |
| c44907_g1_i1  | - | 824   | 33    | 4.41  |
| c9932_g2_i1   | - | 433   | 17    | 4.32  |
| c148924_g1_i1 | - | 318   | 12    | 4.16  |
| c36781_g1_i1  | - | 717   | 27    | 4.15  |
| c35609_g1_i1  | - | 772   | 26    | 3.71  |
| c69106_g1_i1  | - | 331   | 11    | 3.66  |
| c158730_g1_i1 | - | 638   | 21    | 3.62  |
| c106268_g1_i1 | - | 465   | 14    | 3.32  |
| c35609_g2_i3  | - | 574   | 17    | 3.26  |
| c154455_g1_i1 | - | 410   | 12    | 3.22  |
| c124960_g1_i1 | - | 1,131 | 33    | 3.21  |
| c126361_g1_i1 | - | 343   | 10    | 3.21  |

Supplementary Table 3



|                                       |               |     |                |                |                  |
|---------------------------------------|---------------|-----|----------------|----------------|------------------|
|                                       | c51355_g1_i1  | -   | 279            | 8              | 3.16             |
|                                       | c5874_g1_i1   | -   | 532            | 15             | 3.10             |
|                                       | c44537_g1_i1  | -   | 836            | 23             | 3.03             |
|                                       | c103717_g1_i1 | -   | 342            | 9              | 2.90             |
|                                       | c54183_g1_i1  | -   | 687            | 18             | 2.88             |
|                                       | c11473_g1_i1  | -   | 325            | 8              | 2.71             |
|                                       | c35609_g2_i2  | -   | 501            | 12             | 2.64             |
|                                       | c177712_g1_i1 | -   | 350            | 8              | 2.52             |
|                                       | c13003_g1_i1  | -   | 396            | 9              | 2.50             |
|                                       | c71551_g1_i1  | -   | 269            | 6              | 2.46             |
|                                       | c8447_g1_i1   | -   | 866            | 19             | 2.42             |
|                                       | c140392_g1_i1 | -   | 289            | 6              | 2.29             |
|                                       | c9932_g1_i1   | -   | 167            | 3              | 1.98             |
|                                       | c155529_g1_i1 | -   | 587            | 10             | 1.88             |
|                                       | c71020_g1_i1  | -   | 369            | 6              | 1.79             |
|                                       | c133671_g1_i1 | -   | 393            | 6              | 1.68             |
|                                       | c178180_g1_i1 | -   | 344            | 5              | 1.60             |
|                                       | c174348_g1_i1 | -   | 826            | 12             | 1.60             |
|                                       | c69216_g1_i1  | -   | 696            | 10             | 1.58             |
|                                       | c123895_g1_i1 | yes | 372            | 5              | 1.48             |
|                                       | c88033_g1_i1  | -   | 150            | 2              | 1.47             |
|                                       | c182508_g1_i1 | -   | 150            | 2              | 1.47             |
|                                       | c4027_g1_i1   | -   | 154            | 2              | 1.43             |
|                                       | c182887_g1_i1 | -   | 315            | 4              | 1.40             |
|                                       | c158504_g1_i1 | -   | 402            | 5              | 1.37             |
|                                       | c133015_g1_i1 | -   | 251            | 3              | 1.32             |
|                                       | c188173_g1_i1 | -   | 221            | 2              | 1.00             |
|                                       | c140274_g1_i1 | -   | 142            | 1              | 0.78             |
|                                       | c185179_g1_i1 | -   | 319            | 2              | 0.69             |
| <i>Total</i>                          |               |     | <b>54 / 96</b> | <b>157,365</b> | <b>14,657.79</b> |
| <b>Peptidase S1 -<br/>LDLA domain</b> | c19670_g1_i1  | -   | 1,506          | 460            | 33.63            |
|                                       | c41290_g2_i7  | -   | 1,986          | 174            | 9.65             |
|                                       | c41290_g2_i5  | -   | 4,402          | 420            | 10.51            |
|                                       | c41290_g2_i1  | -   | 2,407          | 246            | 11.25            |
|                                       | c41290_g3_i1  | -   | 2,939          | 670            | 25.10            |
|                                       | c41290_g3_i2  | -   | 3,125          | 642            | 22.62            |
| <i>Total</i>                          |               |     | <b>6 / 6</b>   | <b>2,612</b>   | <b>112.76</b>    |
| <b>Peptidase S10</b>                  | c36911_g1_i1  | -   | 3,284          | 720            | 24.14            |
|                                       | c171170_g1_i1 | -   | 332            | 39             | 12.93            |
|                                       | c122754_g1_i1 | -   | 1,082          | 65             | 6.61             |
|                                       | c170269_g1_i1 | -   | 693            | 36             | 5.72             |
|                                       | c121851_g1_i1 | -   | 1,327          | 49             | 4.07             |
|                                       | c12279_g1_i1  | -   | 409            | 14             | 3.77             |
| <i>Total</i>                          |               |     | <b>5 / 6</b>   | <b>909</b>     | <b>53.48</b>     |
| <b>Phospholipase A2</b>               | c40783_g1_i2  | -   | 3,136          | 5,734          | 201.33           |
|                                       | c40783_g1_i1  | -   | 3,133          | 5,149          | 180.96           |
|                                       | c36194_g1_i1  | yes | 958            | 754            | 86.66            |
|                                       | c35152_g1_i1  | -   | 965            | 603            | 68.80            |
|                                       | c41269_g2_i1  | yes | 1,066          | 441            | 45.55            |
|                                       | c38299_g1_i2  | yes | 1,238          | 408            | 36.29            |
|                                       | c38299_g1_i1  | yes | 610            | 165            | 29.78            |

Supplementary Table 3

|                                       |               |     |               |               |               |
|---------------------------------------|---------------|-----|---------------|---------------|---------------|
|                                       | c14022_g1_i1  | yes | 1,074         | 56            | 5.74          |
|                                       | c44309_g1_i1  | yes | 589           | 23            | 4.30          |
|                                       | c3302_g1_i1   | -   | 926           | 26            | 3.09          |
|                                       | c3302_g1_i2   | -   | 926           | 22            | 2.62          |
|                                       | c147416_g1_i1 | -   | 573           | 12            | 2.31          |
| <i>Total</i>                          |               |     | <b>9 / 12</b> | <b>13,336</b> | <b>658.20</b> |
| <b>Serpin</b>                         | c38500_g1_i2  | -   | 1,835         | 618           | 37.08         |
|                                       | c40151_g1_i1  | yes | 1,738         | 510           | 32.31         |
|                                       | c38500_g1_i1  | -   | 1,375         | 250           | 20.02         |
|                                       | c44653_g1_i1  | yes | 578           | 76            | 14.48         |
|                                       | c40233_g1_i2  | -   | 1,217         | 140           | 12.67         |
|                                       | c40233_g1_i1  | -   | 1,357         | 152           | 12.33         |
|                                       | c41454_g5_i3  | -   | 1,833         | 142           | 8.53          |
|                                       | c41454_g5_i1  | yes | 1,657         | 127           | 8.44          |
|                                       | c41454_g5_i4  | -   | 1,761         | 125           | 7.82          |
| <i>Total</i>                          |               |     | <b>9 / 9</b>  | <b>2,140</b>  | <b>153.67</b> |
| <b>Sphingomyelinase</b>               | c37208_g1_i1  | yes | 1,978         | 479           | 26.66         |
|                                       | c42331_g1_i1  | yes | 2,029         | 196           | 10.64         |
|                                       | c95721_g1_i1  | yes | 2,631         | 206           | 8.62          |
|                                       | c122187_g1_i1 | -   | 1,330         | 61            | 5.05          |
|                                       | c44135_g1_i1  | -   | 649           | 29            | 4.92          |
|                                       | c142423_g1_i1 | -   | 336           | 5             | 1.64          |
|                                       | c33214_g1_i1  | -   | 213           | 0             | 0.00          |
| <i>Total</i>                          |               |     | <b>5 / 7</b>  | <b>971</b>    | <b>55.89</b>  |
| <b>VEGF-like</b>                      | c29900_g1_i1  | yes | 2,348         | 575           | 26.96         |
|                                       | c32284_g1_i1  | yes | 877           | 184           | 23.10         |
|                                       | c8224_g1_i1   | yes | 1,142         | 85            | 8.20          |
|                                       | c102420_g1_i1 | yes | 1,144         | 66            | 6.35          |
|                                       | c123107_g1_i1 | yes | 346           | 16            | 5.09          |
|                                       | c29347_g1_i1  | yes | 764           | 34            | 4.90          |
|                                       | c88368_g1_i1  | -   | 443           | 19            | 4.72          |
|                                       | c8330_g1_i1   | yes | 732           | 29            | 4.36          |
|                                       | c27914_g1_i1  | -   | 545           | 21            | 4.24          |
|                                       | c30963_g3_i1  | -   | 184           | 4             | 2.39          |
|                                       | c97173_g1_i1  | -   | 175           | 1             | 0.63          |
| <i>Total</i>                          |               |     | <b>6 / 11</b> | <b>973</b>    | <b>73.88</b>  |
| <b>Xibalbin 5<br/>(Putative CSab)</b> | c69533_g1_i1  | yes | 802           | 35            | 4.81          |
| <b>Xibalbin 6 (CHH/ITP)</b>           | c170523_g1_i1 | -   | 969           | <b>88</b>     | <b>10.00</b>  |
| <b>Xibalbin 7<br/>(sIGFBP-rp)</b>     | c39061_g3_i1  | yes | 619           | 2,507         | 445.95        |
|                                       | c37504_g1_i1  | yes | 725           | 66            | 10.02         |
|                                       | c37504_g1_i2  | yes | 1,144         | 99            | 9.53          |
|                                       | c147484_g1_i1 | yes | 477           | 40            | 9.23          |
|                                       | c151081_g1_i1 | yes | 826           | 66            | 8.80          |
|                                       | c20493_g1_i1  | yes | 962           | 72            | 8.24          |
|                                       | c37504_g1_i3  | yes | 737           | 44            | 6.57          |
|                                       | c95379_g1_i1  | yes | 407           | 6             | 1.62          |
| <i>Total</i>                          |               |     | <b>7 / 8</b>  | <b>2,894</b>  | <b>498.34</b> |
| <b>Xibalbin 8<br/>(Unknown 1)</b>     | c122822_g1_i1 | yes | 741           | 5,312         | 789.33        |

Supplementary Table 3

|                                   |              |     |              |       |              |                 |
|-----------------------------------|--------------|-----|--------------|-------|--------------|-----------------|
|                                   | c38865_g1_i1 | yes |              | 600   | 3,013        | 552.93          |
|                                   | c27492_g1_i1 | yes |              | 417   | 7            | 1.85            |
| <i>Total</i>                      |              |     | <b>2 / 3</b> |       | <b>8,325</b> | <b>1,342.26</b> |
| <b>Xibalbin 9<br/>(Unknown 2)</b> | c11438_g1_i1 | yes | <b>1</b>     | 727   | <b>540</b>   | <b>82</b>       |
| <b>Xibalbin 13 (ICK)</b>          | c37192_g1_i4 | yes |              | 984   | 124          | 13.88           |
|                                   | c37192_g1_i2 | yes |              | 927   | 116          | 13.78           |
|                                   | c37192_g1_i3 | yes |              | 1,011 | 110          | 11.98           |
| <i>Total</i>                      |              |     | <b>3 / 3</b> |       | <b>350</b>   | <b>39.63</b>    |

## Supplementary Table 4:

Novel remipede venom peptide families and peptides named according to the rational nomenclature for venom peptide toxins proposed by King et al. (2008). *Toxicon* 52: 264-276, and modified by Undheim et al. (2014). *Molecular Biology and Evolution* 31: 2124-2148.\* The expression level of these transcripts did not satisfy the cut-off level. See main text for explanation.

| Peptide family | Peptide            | Transcript    |
|----------------|--------------------|---------------|
| Xibalbin 1     | U-xibalbin1-Xtu1a  | c27367_g1_i1  |
| Xibalbin 2     | U-xibalbin2-Xtu1a  | c29772_g1_i1  |
| Xibalbin 3     | U-xibalbin3-Xtu1a  | c9387_g1_i1   |
|                | U-xibalbin3-Xtu1b  | c29843_g1_i2  |
| Xibalbin 4     | U-xibalbin4-Xtu1a  | c18306_g1_i1  |
| Xibalbin 5     | U-xibalbin5-Xtu1a  | c28491_g1_i1  |
| Xibalbin 6     | U-xibalbin6-Xtu1a  | c13591_g1_i1  |
| Xibalbin 7     | U-xibalbin7-Xtu1a  | c23977_g2_i2* |
|                | U-xibalbin7-Xtu1b  | c23977_g2_i1* |
| Xibalbin 8     | U-xibalbin8-Xtu1a  | c23843_g2_i1  |
| Xibalbin 9     | U-xibalbin9-Xtu1a  | c23666_g1_i1  |
| Xibalbin 10    | U-xibalbin10-Xtu1a | c25771_g1_i2  |
| Xibalbin 11    | U-xibalbin11-Xtu1a | c29407_g1_i2  |
|                | U-xibalbin11-Xtu1b | c29407_g1_i1  |

**Supplementary Table 5: Venom gland tissue transcriptome (SOAPdenovo-Tran contigs that match against secreted proteins [UniProtSL0243])**

| Nr.  | Contig name                        | Read Numbers | Blast result (evalue=10 <sup>-5</sup> , BlastP, Nr database)         | Seq. length | min. evalue | mean similarity | SignalP | InterProScan                                                                                                                                                                                    |
|------|------------------------------------|--------------|----------------------------------------------------------------------|-------------|-------------|-----------------|---------|-------------------------------------------------------------------------------------------------------------------------------------------------------------------------------------------------|
| 1799 | 98935_length_138_cvg_113.1_tip_1_0 | 71           | serine protease 56                                                   | 46          | 1.94E-08    | 71.70%          | 0.123   | IPR001254 (PFAM); G3DSA:2.40.10.10 (GENE3D); PTHR24265 (PANTHER); IPR009003 (SUPERFAMILY)                                                                                                       |
| 1    | 101333_length_141_cvg_61.0_tip_1_5 | 60           | chitinase 3                                                          | 47          | 2.70E-10    | 67.50%          | 0.121   | IPR013781 (G3DSA:3.20.20.GENE3D); IPR017853 (SUPERFAMILY)                                                                                                                                       |
| 2    | 102385_length_141_cvg_96.7_tip_0_4 | 59           | serine protease like protein                                         | 47          | 6.55E-07    | 77.60%          | 0.174   | IPR001254 (PFAM); G3DSA:2.40.10.10 (GENE3D); IPR018114 (PROSITE_PATTERNS); IPR009003 (SUPERFAMILY)                                                                                              |
| 3    | 102473_length_141_cvg_63.0_tip_0_4 | 25           | serine protease like protein                                         | 47          | 2.91E-07    | 77.60%          | 0.188   | IPR001254 (PFAM); G3DSA:2.40.10.10 (GENE3D); IPR018114 (PROSITE_PATTERNS); IPR009003 (SUPERFAMILY)                                                                                              |
| 4    | 102637_length_142_cvg_23.3_tip_1_5 | 0            | zinc finger protein partial                                          | 47          | 6.80E-18    | 89.20%          | 0.107   | IPR004457 (PFAM); PTHR10876 (PANTHER); PTHR10876:SF0 (PANTHER)                                                                                                                                  |
| 5    | 103713_length_142_cvg_7.4_tip_1_2  | 4            | serine protease like protein                                         | 47          | 8.62E-07    | 74.90%          | 0.154   | IPR001254 (PFAM); G3DSA:2.40.10.10 (GENE3D); IPR018114 (PROSITE_PATTERNS); IPR009003 (SUPERFAMILY)                                                                                              |
| 6    | 104322_length_143_cvg_5.2_tip_1_0  | 0            | bile salt-activated lipase                                           | 48          | 4.23E-09    | 73.40%          | 0.172   | IPR029058 (G3DSA:3.40.50.GENE3D); IPR002018 (PFAM); PTHR11559 (PANTHER); PTHR11559:SF139 (PANTHER); IPR029058 (SUPERFAMILY)                                                                     |
| 7    | 104656_length_143_cvg_2.0_tip_1_1  | 0            | insulin-degrading enzyme isoform x2                                  | 48          | 2.91E-11    | 80.20%          | 0.124   | IPR011237 (G3DSA:3.30.830.GENE3D); IPR011249 (SUPERFAMILY)                                                                                                                                      |
| 8    | 105418_length_143_cvg_10.5_tip_1_3 | 0            | stearoyl- desaturase partial                                         | 48          | 7.97E-14    | 83.70%          | 0.289   | IPR015876 (PRINTS); PTHR11351 (PANTHER); CYTOPLASMIC_DOMAIN (PHOBIUS); NON_CYTOPLASMIC_DOMAIN (PHOBIUS); TRANSMEMBRANE (PHOBIUS); TMhelix (TMHMM)                                               |
| 9    | 106280_length_144_cvg_6.2_tip_1_2  | 0            | venom serine carboxypeptidase                                        | 48          | 1.06E-13    | 81.00%          | 0.098   | IPR001563 (PFAM); IPR029058 (G3DSA:3.40.50.GENE3D); PTHR11802:SF30 (PANTHER); IPR001563 (PANTHER); IPR029058 (SUPERFAMILY)                                                                      |
| 10   | 106336_length_144_cvg_6.0_tip_1_0  | 0            | ---NA---                                                             | 48          |             |                 | 0.113   | IPR000716 (PFAM); IPR000716 (G3DSA:4.10.800.GENE3D); IPR000716 (PROSITE_PROFILES); IPR000716 (SUPERFAMILY)                                                                                      |
| 11   | 107051_length_144_cvg_61.0_tip_1_1 | 47           | mucin-22 isoform x4                                                  | 48          | 4.61E-07    | 67.50%          | 0.1     | IPR013781 (G3DSA:3.20.20.GENE3D); IPR001223 (PFAM); IPR017853 (SUPERFAMILY)                                                                                                                     |
| 12   | 108305_length_145_cvg_2.0_tip_1_2  | 2            | hypothetical protein EGK_12522, partial                              | 48          | 6.34E-08    | 75.00%          | 0.759 Y | SIGNAL_PEPTIDE (PHOBIUS); NON_CYTOPLASMIC_DOMAIN (PHOBIUS); SIGNAL_PEPTIDE_C_REGION (PHOBIUS); SIGNAL_PEPTIDE_N_REGION (PHOBIUS); SIGNAL_PEPTIDE_H_REGION (PHOBIUS); SignalP-noTM (SIGNALP_EUK) |
| 13   | 110726_length_146_cvg_3.0_tip_1_3  | 0            | prophenoloxidase 1                                                   | 49          | 2.55E-16    | 78.20%          | 0.109   | IPR000896 (PFAM); IPR008922 (G3DSA:1.10.1280.GENE3D); IPR013788 (PANTHER); PTHR11511:SF24 (PANTHER); IPR008922 (SUPERFAMILY)                                                                    |
| 14   | 110738_length_146_cvg_2.0_tip_1_0  | 0            | alanine dehydrogenase                                                | 49          | 1.75E-21    | 100.00%         | 0.16    | IPR007698 (PFAM); IPR016040 (G3DSA:3.40.50.GENE3D); PTHR10160 (PANTHER); SSF51735 (SUPERFAMILY); TMhelix (TMHMM)                                                                                |
| 15   | 111644_length_147_cvg_60.0_tip_1_4 | 23           | polycystic kidney disease protein 1-like 2-like                      | 49          | 2.10E-06    | 70.50%          | 0.097   | IPR002172 (SMART); IPR002172 (PFAM); IPR002172 (G3DSA:4.10.400.GENE3D); IPR023415 (PROSITE_PATTERNS); IPR002172 (PROSITE_PROFILES); IPR002172 (SUPERFAMILY)                                     |
| 16   | 111700_length_147_cvg_2.0_tip_1_1  | 2            | mre11 meiotic recombination 11 homolog a ( cerevisiae) isoform cra_b | 49          | 7.16E-15    | 85.70%          | 0.217   | PTHR22878 (PANTHER)                                                                                                                                                                             |
| 17   | 111700_length_147_cvg_2.0_tip_1_3  | 2            | polymerase (dna directed) isoform cra_c                              | 49          | 1.88E-19    | 85.80%          | 0.329   | PR02045 (PRINTS); PTHR12138 (PANTHER)                                                                                                                                                           |
| 18   | 111700_length_147_cvg_2.0_tip_1_5  | 2            | tak1-binding protein isoform cra_b                                   | 49          | 8.43E-14    | 79.50%          | 0.175   | PTHR16213 (PANTHER)                                                                                                                                                                             |
| 19   | 114208_length_148_cvg_10.4_tip_1_4 | 1            | serine proteinase stubble-like                                       | 49          | 1.22E-07    | 66.70%          | 0.111   | G3DSA:2.40.10.10 (GENE3D); IPR001254 (PFAM); IPR009003 (SUPERFAMILY)                                                                                                                            |
| 20   | 114538_length_149_cvg_2.0_tip_1_0  | 0            | histone h2b 1 2-like                                                 | 50          | 1.81E-26    | 100.00%         | 0.111   | IPR000558 (PRINTS); IPR000558 (SMART); IPR007125 (PFAM); IPR009072 (G3DSA:1.10.20.GENE3D); IPR000558 (PANTHER); IPR009072 (SUPERFAMILY)                                                         |
| 21   | 115238_length_149_cvg_9.0_tip_1_0  | 2            | chitinase 2                                                          | 50          | 1.44E-10    | 68.50%          | 0.105   | IPR001223 (PFAM); IPR013781 (G3DSA:3.20.20.GENE3D); PTHR11177:SF37 (PANTHER); PTHR11177 (PANTHER); IPR001579 (PROSITE_PATTERNS); IPR017853 (SUPERFAMILY)                                        |
| 22   | 116894_length_150_cvg_4.5_tip_1_5  | 1            | atrial natriuretic peptide-converting enzyme-like                    | 50          | 3.03E-06    | 67.50%          | 0.119   | IPR002172 (SMART); IPR002172 (PFAM); IPR002172 (G3DSA:4.10.400.GENE3D); IPR002172 (PROSITE_PROFILES); IPR002172 (SUPERFAMILY)                                                                   |
| 24   | 118732_length_151_cvg_76.5_tip_0_2 | 76           | secreted partial                                                     | 50          | 2.34E-09    | 63.20%          | 0.102   | IPR002557 (SMART); IPR002557 (PFAM); IPR002557 (G3DSA:2.170.140.GENE3D); PTHR23301 (PANTHER); IPR002557 (PROSITE_PROFILES); IPR002557 (SUPERFAMILY)                                             |
| 26   | 120362_length_152_cvg_14.7_tip_1_5 | 1            | carboxypeptidase partial                                             | 50          | 1.02E-09    | 71.10%          | 0.097   | G3DSA:3.40.630.10 (GENE3D); PTHR11705 (PANTHER); SSF53187 (SUPERFAMILY)                                                                                                                         |
| 23   | 118192_length_151_cvg_60.8_tip_1_3 | 56           | isoform h                                                            | 51          | 4.58E-09    | 65.80%          | 0.106   | IPR001223 (PFAM); IPR013781 (G3DSA:3.20.20.GENE3D); IPR017853 (SUPERFAMILY)                                                                                                                     |
| 25   | 119748_length_152_cvg_35.3_tip_1_0 | 25           | ---NA---                                                             | 51          |             |                 | 0.098   | IPR002172 (SMART); IPR002172 (PFAM); IPR002172 (G3DSA:4.10.400.GENE3D); IPR023415 (PROSITE_PATTERNS); IPR002172 (PROSITE_PROFILES); IPR002172 (SUPERFAMILY)                                     |

|    |                                    |     |                                                                      |    |          |         |       |                                                                                                                                                                                 |
|----|------------------------------------|-----|----------------------------------------------------------------------|----|----------|---------|-------|---------------------------------------------------------------------------------------------------------------------------------------------------------------------------------|
| 27 | 120494_length_152_cvg_9.4_tip_1_3  | 9   | low-density lipoprotein receptor-related protein 6 isoform 2         | 51 | 2.72E-11 | 73.10%  | 0.102 | IPR002172 (SMART); IPR002172 (PFAM); G3DSA:4.10.1220.10 (GENE3D); IPR002172 (G3DSA:4.10.400.GENE3D); PTHR10529 (PANTHER); IPR002172 (PROSITE_PROFILES); IPR002172 (SUPERFAMILY) |
| 28 | 121382_length_153_cvg_75.8_tip_1_1 | 2   | carboxypeptidase b-like                                              | 51 | 7.06E-12 | 77.80%  | 0.126 | IPR000834 (PFAM); G3DSA:3.40.630.10 (GENE3D); PTHR11705 (PANTHER); SSF53187 (SUPERFAMILY)                                                                                       |
| 29 | 121892_length_153_cvg_7.1_tip_1_3  | 2   | low-density lipoprotein receptor-related protein 5                   | 51 | 5.30E-08 | 63.22%  | 0.105 | IPR002172 (SMART); IPR002172 (PFAM); IPR002172 (G3DSA:4.10.400.GENE3D); IPR023415 (PROSITE_PATTERNS); IPR002172 (PROSITE_PROFILES); IPR002172 (SUPERFAMILY)                     |
| 30 | 122044_length_153_cvg_3.0_tip_1_5  | 0   | gelsolin-like allergen der f 16                                      | 51 | 1.67E-14 | 69.10%  | 0.108 | IPR029006 (G3DSA:3.40.20.GENE3D); IPR007123 (PFAM); IPR007122 (PANTHER); IPR030016 (PTHR11977:PANTHER); SSF55753 (SUPERFAMILY)                                                  |
| 31 | 122840_length_154_cvg_6.7_tip_1_4  | 0   | partial                                                              | 51 | 1.38E-13 | 80.80%  | 0.106 | Coil (COILS)                                                                                                                                                                    |
| 33 | 124508_length_155_cvg_2.0_tip_1_5  | 0   | serine protease 45 isoform x5                                        | 51 | 6.33E-07 | 72.40%  | 0.281 | G3DSA:2.40.10.10 (GENE3D); IPR001254 (PFAM); IPR009003 (SUPERFAMILY)                                                                                                            |
| 32 | 123884_length_155_cvg_5.0_tip_1_3  | 0   | alpha-carbonic anhydrase                                             | 52 | 5.88E-15 | 77.10%  | 0.265 | IPR001148 (PFAM); IPR001148 (G3DSA:3.10.200.GENE3D); PTHR18952:SF92 (PANTHER); IPR023561 (PANTHER); IPR001148 (PROSITE_PROFILES); IPR001148 (SUPERFAMILY)                       |
| 34 | 124954_length_155_cvg_5.0_tip_1_3  | 3   | venom allergen 3-like                                                | 52 | 1.73E-11 | 67.80%  | 0.129 | IPR014044 (G3DSA:3.40.33.GENE3D); IPR014044 (SUPERFAMILY)                                                                                                                       |
| 35 | 125338_length_156_cvg_34.9_tip_1_4 | 13  | serine protease easter                                               | 52 | 3.26E-07 | 74.20%  | 0.183 | IPR001254 (PFAM); G3DSA:2.40.10.10 (GENE3D); PTHR24275 (PANTHER); IPR009003 (SUPERFAMILY)                                                                                       |
| 36 | 125508_length_156_cvg_14.0_tip_1_5 | 13  | chitinase 3                                                          | 52 | 4.42E-09 | 63.90%  | 0.102 | IPR001223 (PFAM); IPR013781 (G3DSA:3.20.20.GENE3D); IPR017853 (SUPERFAMILY)                                                                                                     |
| 37 | 126180_length_156_cvg_41.2_tip_1_0 | 3   | basement membrane-specific heparan sulfate proteoglycan core protein | 52 | 3.37E-08 | 63.30%  | 0.1   | IPR002172 (PRINTS); IPR002172 (SMART); IPR002172 (G3DSA:4.10.400.GENE3D); IPR002172 (PFAM); IPR023415 (PROSITE_PATTERNS); IPR002172 (PROSITE_PROFILES); IPR002172 (SUPERFAMILY) |
| 38 | 127252_length_157_cvg_39.5_tip_1_2 | 124 | proclotting enzyme-like                                              | 52 | 2.79E-10 | 72.00%  | 0.147 | IPR001254 (PFAM); G3DSA:2.40.10.10 (GENE3D); PTHR24275 (PANTHER); IPR001254 (PROSITE_PROFILES); IPR009003 (SUPERFAMILY)                                                         |
| 39 | 127822_length_157_cvg_45.2_tip_1_0 | 23  | venom allergen 3                                                     | 53 | 8.87E-09 | 78.33%  | 0.101 | IPR014044 (G3DSA:3.40.33.GENE3D); IPR014044 (SUPERFAMILY)                                                                                                                       |
| 40 | 128010_length_157_cvg_3.6_tip_1_3  | 1   | ---NA---                                                             | 53 |          |         | 0.199 | no IPS match                                                                                                                                                                    |
| 41 | 128474_length_158_cvg_20.8_tip_1_3 | 7   | transmembrane protease serine 11f                                    | 53 | 1.56E-08 | 64.10%  | 0.235 | G3DSA:2.40.10.10 (GENE3D); IPR001254 (PFAM); PTHR24250 (PANTHER); IPR009003 (SUPERFAMILY)                                                                                       |
| 42 | 130338_length_159_cvg_16.0_tip_1_4 | 0   | serine proteinase stubble-like                                       | 53 | 2.25E-09 | 72.70%  | 0.154 | G3DSA:2.40.10.10 (GENE3D); IPR001254 (PFAM); PTHR24256 (PANTHER); IPR018114 (PROSITE_PATTERNS); IPR009003 (SUPERFAMILY)                                                         |
| 43 | 130422_length_159_cvg_2.0_tip_1_4  | 0   | serine endoprotease partial                                          | 53 | 3.99E-24 | 100.00% | 0.107 | IPR001940 (PRINTS); G3DSA:2.40.10.10 (GENE3D); IPR001254 (PFAM); PTHR22939 (PANTHER); IPR009003 (SUPERFAMILY)                                                                   |
| 44 | 130464_length_159_cvg_14.8_tip_1_0 | 1   | carboxypeptidase b-like                                              | 53 | 1.15E-10 | 71.30%  | 0.142 | G3DSA:3.40.630.10 (GENE3D); SSF53187 (SUPERFAMILY)                                                                                                                              |
| 45 | 130948_length_159_cvg_63.0_tip_0_3 | 3   | probable serine carboxypeptidase cpvl                                | 53 | 1.59E-11 | 72.00%  | 0.12  | IPR001563 (PFAM); IPR029058 (G3DSA:3.40.50.GENE3D); IPR001563 (PANTHER); IPR029058 (SUPERFAMILY)                                                                                |
| 46 | 133688_length_161_cvg_3.8_tip_1_4  | 0   | alpha beta hydrolase domain-containing protein 17b-like              | 54 | 9.27E-30 | 99.00%  | 0.101 | IPR029059 (PFAM); IPR029058 (G3DSA:3.40.50.GENE3D); PTHR12277:SF55 (PANTHER); PTHR12277 (PANTHER); IPR029058 (SUPERFAMILY)                                                      |
| 47 | 133740_length_161_cvg_63.0_tip_0_0 | 2   | low quality protein: glutathione peroxidase 1-like                   | 54 | 1.53E-22 | 84.20%  | 0.106 | IPR012336 (G3DSA:3.40.30.GENE3D); PTHR11592:SF24 (PANTHER); IPR000889 (PANTHER); IPR000889 (PROSITE_PROFILES); IPR012336 (SUPERFAMILY)                                          |
| 48 | 134146_length_162_cvg_3.5_tip_1_4  | 1   | ---NA---                                                             | 54 |          |         | 0.105 | IPR002172 (SMART); IPR002172 (PFAM); IPR002172 (G3DSA:4.10.400.GENE3D); IPR023415 (PROSITE_PATTERNS); IPR002172 (PROSITE_PROFILES); IPR002172 (SUPERFAMILY)                     |
| 49 | 134236_length_162_cvg_55.7_tip_1_5 | 2   | very low-density lipoprotein receptor                                | 54 | 8.68E-07 | 63.67%  | 0.191 | G3DSA:4.10.1220.10 (GENE3D); IPR002172 (G3DSA:4.10.400.GENE3D); IPR002172 (PFAM); IPR002172 (SUPERFAMILY)                                                                       |
| 50 | 134534_length_162_cvg_30.0_tip_1_5 | 3   | serine protease 42-like                                              | 54 | 8.10E-07 | 71.40%  | 0.157 | G3DSA:2.40.10.10 (GENE3D); IPR001254 (PFAM); IPR018114 (PROSITE_PATTERNS); IPR009003 (SUPERFAMILY)                                                                              |
| 51 | 134664_length_162_cvg_4.0_tip_1_1  | 4   | st14a protein                                                        | 54 | 3.02E-06 | 69.00%  | 0.1   | IPR001254 (PFAM); G3DSA:2.40.10.10 (GENE3D); IPR009003 (SUPERFAMILY)                                                                                                            |
| 52 | 135072_length_162_cvg_8.5_tip_1_5  | 8   | basement membrane-specific heparan sulfate proteoglycan core protein | 54 | 2.27E-09 | 66.60%  | 0.103 | IPR002172 (SMART); G3DSA:4.10.1220.10 (GENE3D); IPR002172 (PFAM); IPR002172 (G3DSA:4.10.400.GENE3D); IPR002172 (PROSITE_PROFILES); IPR002172 (SUPERFAMILY)                      |
| 53 | 135316_length_162_cvg_2.0_tip_1_4  | 0   | heat shock cognate 70                                                | 54 | 4.74E-20 | 85.80%  | 0.099 | IPR029048 (G3DSA:1.20.1270.GENE3D); PTHR19375 (PANTHER); PTHR19375:SF142 (PANTHER); IPR029048 (SUPERFAMILY)                                                                     |
| 55 | 136372_length_163_cvg_2.0_tip_1_2  | 2   | membrane alanyl aminopeptidase                                       | 54 | 2.73E-29 | 100.00% | 0.168 | IPR014782 (PRINTS); IPR014782 (PFAM); G3DSA:1.10.390.10 (GENE3D); PTHR11533:SF163 (PANTHER); IPR001930 (PANTHER); SSF55486 (SUPERFAMILY)                                        |
| 54 | 136174_length_163_cvg_2.2_tip_1_3  | 0   | hypothetical protein Y032_0473g2095                                  | 55 | 1.01E-07 | 73.80%  | 0.122 | no IPS match                                                                                                                                                                    |
| 56 | 136396_length_163_cvg_3.1_tip_1_0  | 0   | heat shock cognate 71 kda protein                                    | 55 | 4.22E-27 | 93.40%  | 0.1   | IPR013126 (PRINTS); G3DSA:3.30.30.30 (GENE3D); IPR013126 (PFAM); PTHR19375 (PANTHER); PTHR19375:SF155 (PANTHER); SSF53067 (SUPERFAMILY)                                         |
| 57 | 136832_length_163_cvg_2.0_tip_1_3  | 0   | protein sda1 homolog                                                 | 55 | 6.40E-20 | 91.00%  | 0.165 | IPR027312 (PTHR12730:PANTHER); PTHR12730 (PANTHER)                                                                                                                              |
| 58 | 136844_length_163_cvg_2.0_tip_1_0  | 0   | elastin isoform x11                                                  | 55 | 4.46E-08 | 66.14%  | 0.099 | no IPS match                                                                                                                                                                    |
| 59 | 138652_length_165_cvg_2.1_tip_1_0  | 0   | glyceraldehyde-3-phosphate dehydrogenase                             | 55 | 2.64E-13 | 89.70%  | 0.123 | IPR020831 (PANTHER); PTHR10836:SF31 (PANTHER)                                                                                                                                   |

|    |                                     |     |                                                         |    |          |        |       |                                                                                                                                                                                                                                                                                                                                                                                                |
|----|-------------------------------------|-----|---------------------------------------------------------|----|----------|--------|-------|------------------------------------------------------------------------------------------------------------------------------------------------------------------------------------------------------------------------------------------------------------------------------------------------------------------------------------------------------------------------------------------------|
| 60 | 139536_length_165_cvg_132.3_tip_0_1 | 473 | low-density lipoprotein receptor-related protein 2-like | 55 | 1.51E-06 | 71.50% | 0.099 | IPR002172 (SMART); IPR002172 (PFAM); IPR002172 (G3DSA:4.10.400.GENE3D); IPR023415 (PROSITE_PATTERNS); IPR002172 (PROSITE_PROFILES); IPR002172 (SUPERFAMILY)                                                                                                                                                                                                                                    |
| 63 | 141944_length_167_cvg_2.0_tip_1_2   | 0   | partial                                                 | 55 | 3.22E-19 | 85.00% | 0.096 | IPR013320 (G3DSA:2.60.120.GENE3D); IPR001580 (PFAM); PTHR11073:SF5 (PANTHER); IPR001580 (PANTHER); IPR013320 (SUPERFAMILY)                                                                                                                                                                                                                                                                     |
| 61 | 140504_length_166_cvg_78.5_tip_1_0  | 5   | urokinase-type plasminogen activator                    | 56 | 1.43E-08 | 73.30% | 0.31  | G3DSA:2.40.10.10 (GENE3D); IPR001254 (PFAM); PTHR24265 (PANTHER); IPR001254 (PROSITE_PROFILES); IPR009003 (SUPERFAMILY)                                                                                                                                                                                                                                                                        |
| 62 | 141658_length_167_cvg_63.0_tip_1_3  | 31  | chymotrypsin-like elastase family member 1              | 56 | 1.73E-08 | 65.90% | 0.118 | G3DSA:2.40.10.10 (GENE3D); IPR001254 (PFAM); PTHR24268 (PANTHER); IPR018114 (PROSITE_PATTERNS); IPR009003 (SUPERFAMILY)                                                                                                                                                                                                                                                                        |
| 64 | 142817_length_168_cvg_109.6_tip_0_0 | 179 | flocculation protein flo11 isoform x2                   | 56 | 2.58E-07 | 76.80% | 0.132 | IPR001254 (PFAM); G3DSA:2.40.10.10 (GENE3D); IPR018114 (PROSITE_PATTERNS); IPR009003 (SUPERFAMILY)                                                                                                                                                                                                                                                                                             |
| 65 | 142839_length_168_cvg_2.0_tip_1_0   | 0   | c4b-binding protein beta chain                          | 56 | 3.17E-19 | 78.00% | 0.121 | G3DSA:2.10.70.10 (GENE3D); IPR000436 (PFAM); PTHR19325:SF340 (PANTHER); PTHR19325 (PANTHER); IPR000436 (PROSITE_PROFILES); IPR000436 (SUPERFAMILY)                                                                                                                                                                                                                                             |
| 66 | 142999_length_168_cvg_4.6_tip_1_1   | 1   | venom allergen 3- partial                               | 56 | 8.58E-13 | 75.20% | 0.104 | IPR001283 (PRINTS); IPR002413 (PRINTS); IPR014044 (G3DSA:3.40.33.GENE3D); IPR014044 (PFAM); IPR018244 (PROSITE_PATTERNS); IPR014044 (SUPERFAMILY)                                                                                                                                                                                                                                              |
| 67 | 143039_length_168_cvg_7.0_tip_1_4   | 0   | chitinase-related protein 1                             | 56 | 1.89E-15 | 76.30% | 0.114 | IPR013781 (G3DSA:3.20.20.GENE3D); IPR001223 (PFAM); PTHR11177 (PANTHER); IPR017853 (SUPERFAMILY)                                                                                                                                                                                                                                                                                               |
| 68 | 143301_length_168_cvg_103.7_tip_1_4 | 4   | low-density lipoprotein receptor-related protein 2      | 56 | 2.61E-08 | 64.30% | 0.1   | IPR002172 (SMART); IPR002172 (PFAM); IPR002172 (G3DSA:4.10.400.GENE3D); G3DSA:4.10.1220.10 (GENE3D); PTHR10529 (PANTHER); IPR002172 (PROSITE_PROFILES); IPR002172 (SUPERFAMILY)                                                                                                                                                                                                                |
| 69 | 143319_length_168_cvg_10.3_tip_1_1  | 0   | hemagglutinin amebocyte aggregation factor-like         | 56 | 2.36E-12 | 74.30% | 0.108 | PF14704 (PFAM); IPR026645 (PANTHER)                                                                                                                                                                                                                                                                                                                                                            |
| 70 | 143575_length_168_cvg_32.3_tip_1_4  | 1   | transmembrane protease serine 11f                       | 56 | 3.72E-10 | 65.40% | 0.105 | IPR001254 (PFAM); G3DSA:2.40.10.10 (GENE3D); PTHR24275:SF50 (PANTHER); PTHR24275 (PANTHER); IPR001254 (PROSITE_PROFILES); IPR009003 (SUPERFAMILY)                                                                                                                                                                                                                                              |
| 71 | 143643_length_168_cvg_63.0_tip_0_3  | 170 | flocculation protein flo11 isoform x1                   | 56 | 3.63E-07 | 76.80% | 0.133 | G3DSA:2.40.10.10 (GENE3D); IPR001254 (PFAM); IPR018114 (PROSITE_PATTERNS); IPR009003 (SUPERFAMILY)                                                                                                                                                                                                                                                                                             |
| 76 | 145147_length_169_cvg_2.4_tip_1_1   | 0   | hypothetical protein Y032_0580g260                      | 56 | 2.10E-09 | 66.30% | 0.102 | no IPS match                                                                                                                                                                                                                                                                                                                                                                                   |
| 77 | 145155_length_169_cvg_17.3_tip_1_1  | 37  | ---NA---                                                | 56 |          |        | 0.101 | G3DSA:2.40.10.10 (GENE3D); IPR009003 (SUPERFAMILY)                                                                                                                                                                                                                                                                                                                                             |
| 72 | 144515_length_169_cvg_31.0_tip_1_3  | 130 | ---NA---                                                | 57 |          |        | 0.101 | G3DSA:4.10.1220.10 (GENE3D); IPR002172 (G3DSA:4.10.400.GENE3D); IPR002172 (PFAM); IPR002172 (PROSITE_PROFILES); IPR002172 (SUPERFAMILY)                                                                                                                                                                                                                                                        |
| 73 | 144637_length_169_cvg_25.2_tip_1_3  | 2   | agap000573-pb-like protein                              | 57 | 7.35E-08 | 66.60% | 0.11  | G3DSA:2.40.10.10 (GENE3D); IPR001254 (PFAM); IPR009003 (SUPERFAMILY)                                                                                                                                                                                                                                                                                                                           |
| 74 | 145045_length_169_cvg_3.2_tip_0_0   | 0   | hyaluronidase ph-20-like                                | 57 | 5.38E-08 | 62.90% | 0.101 | IPR018155 (PFAM); IPR013785 (G3DSA:3.20.20.GENE3D); IPR017853 (SUPERFAMILY)                                                                                                                                                                                                                                                                                                                    |
| 75 | 145135_length_169_cvg_2.3_tip_0_3   | 0   | hyaluronidase- partial                                  | 57 | 6.11E-08 | 63.20% | 0.1   | IPR013785 (G3DSA:3.20.20.GENE3D); IPR018155 (PFAM); IPR018155 (PANTHER); IPR017853 (SUPERFAMILY)                                                                                                                                                                                                                                                                                               |
| 78 | 145391_length_170_cvg_61.9_tip_1_3  | 81  | acidic mammalian chitinase-like                         | 57 | 8.22E-10 | 65.30% | 0.117 | IPR001223 (PFAM); IPR013781 (G3DSA:3.20.20.GENE3D); IPR017853 (SUPERFAMILY)                                                                                                                                                                                                                                                                                                                    |
| 79 | 146565_length_171_cvg_2.0_tip_1_1   | 0   | cysteine-rich secretory protein 2                       | 57 | 3.11E-26 | 85.60% | 0.12  | IPR014044 (G3DSA:3.40.33.GENE3D); IPR014044 (SUPERFAMILY)                                                                                                                                                                                                                                                                                                                                      |
| 80 | 147255_length_171_cvg_2.6_tip_1_1   | 0   | neurogenic locus notch                                  | 57 | 2.42E-24 | 96.00% | 0.105 | PR00010 (PRINTS); IPR001881 (SMART); G3DSA:2.10.25.10 (GENE3D); IPR000742 (PFAM); G3DSA:2.10.25.10 (GENE3D); PTHR24033 (PANTHER); PTHR24033:SF36 (PANTHER); IPR018097 (PROSITE_PATTERNS); IPR000152 (PROSITE_PATTERNS); IPR013032 (PROSITE_PATTERNS); IPR000152 (PROSITE_PATTERNS); IPR000742 (PROSITE_PROFILES); IPR000742 (PROSITE_PROFILES); SSF57196 (SUPERFAMILY); SSF57196 (SUPERFAMILY) |
| 84 | 148789_length_172_cvg_2.0_tip_1_2   | 0   | isoform a                                               | 57 | 1.27E-06 | 65.50% | 0.102 | IPR002223 (PRINTS); IPR002223 (PFAM); IPR002223 (G3DSA:4.10.410.GENE3D); IPR020901 (PROSITE_PATTERNS); IPR002223 (PROSITE_PROFILES); IPR002223 (SUPERFAMILY)                                                                                                                                                                                                                                   |
| 81 | 147787_length_172_cvg_56.0_tip_1_0  | 357 | sortilin-related receptor                               | 58 | 2.67E-07 | 62.60% | 0.1   | IPR002172 (SMART); IPR002172 (PFAM); IPR002172 (G3DSA:4.10.400.GENE3D); PTHR10529 (PANTHER); PTHR10529:SF222 (PANTHER); IPR023415 (PROSITE_PATTERNS); IPR002172 (PROSITE_PROFILES); IPR002172 (SUPERFAMILY)                                                                                                                                                                                    |
| 82 | 147841_length_172_cvg_8.0_tip_1_0   | 0   | hemagglutinin amebocyte aggregation factor-like         | 58 | 3.77E-10 | 64.60% | 0.102 | PF14704 (PFAM); IPR026645 (PANTHER)                                                                                                                                                                                                                                                                                                                                                            |
| 83 | 148351_length_172_cvg_4.5_tip_1_3   | 0   | histidine-rich glyco                                    | 58 | 5.00E-08 | 63.90% | 0.098 | no IPS match                                                                                                                                                                                                                                                                                                                                                                                   |
| 85 | 149541_length_173_cvg_93.8_tip_1_0  | 248 | isoform a                                               | 58 | 3.71E-06 | 57.67% | 0.11  | IPR002172 (PRINTS); IPR002172 (SMART); IPR002172 (G3DSA:4.10.400.GENE3D); IPR002172 (PFAM); IPR002172 (PROSITE_PROFILES); IPR002172 (SUPERFAMILY)                                                                                                                                                                                                                                              |
| 86 | 149543_length_173_cvg_63.0_tip_1_0  | 132 | isoform a                                               | 58 | 3.71E-06 | 57.67% | 0.11  | IPR002172 (PRINTS); IPR002172 (SMART); IPR002172 (G3DSA:4.10.400.GENE3D); IPR002172 (PFAM); IPR002172 (PROSITE_PROFILES); IPR002172 (SUPERFAMILY)                                                                                                                                                                                                                                              |



|     |                                     |      |                                                         |    |          |         |       |                                                                                                                                                                                                                                         |
|-----|-------------------------------------|------|---------------------------------------------------------|----|----------|---------|-------|-----------------------------------------------------------------------------------------------------------------------------------------------------------------------------------------------------------------------------------------|
| 87  | 149725_length_173_cvg_115.5_tip_0_0 | 297  | low-density lipoprotein receptor-related protein 1-like | 58 | 1.28E-09 | 65.50%  | 0.099 | IPR002172 (G3DSA:4.10.400.GENE3D); G3DSA:4.10.1220.10 (GENE3D); IPR002172 (PFAM); PTHR10529 (PANTHER); IPR023415 (PROSITE_PATTERNS); IPR002172 (PROSITE_PROFILES); IPR002172 (SUPERFAMILY); IPR002172 (SUPERFAMILY)                     |
| 88  | 151099_length_174_cvg_42.2_tip_1_1  | 1    | suppressor of tumorigenicity 14 protein homolog         | 58 | 8.20E-09 | 64.00%  | 0.101 | IPR002172 (PRINTS); IPR002172 (PFAM); G3DSA:4.10.1220.10 (GENE3D); IPR002172 (G3DSA:4.10.400.GENE3D); PTHR10529 (PANTHER); IPR023415 (PROSITE_PATTERNS); IPR002172 (PROSITE_PROFILES); IPR002172 (SUPERFAMILY); IPR002172 (SUPERFAMILY) |
| 89  | 151199_length_174_cvg_59.3_tip_1_1  | 390  | st14a protein                                           | 58 | 1.48E-06 | 63.57%  | 0.101 | G3DSA:2.40.10.10 (GENE3D); IPR001254 (PFAM); IPR009003 (SUPERFAMILY)                                                                                                                                                                    |
| 90  | 151427_length_174_cvg_2.6_tip_1_5   | 5    | endo- -d-glucanase                                      | 58 | 5.15E-22 | 100.00% | 0.12  | IPR002037 (PFAM)                                                                                                                                                                                                                        |
| 91  | 152010_length_175_cvg_21.0_tip_1_4  | 2    | transmembrane protease serine 11a                       | 58 | 8.67E-08 | 65.83%  | 0.105 | G3DSA:2.40.10.10 (GENE3D); IPR001254 (PFAM); IPR009003 (SUPERFAMILY)                                                                                                                                                                    |
| 93  | 152778_length_176_cvg_88.1_tip_0_5  | 30   | probable serine carboxypeptidase cpvl isoform x5        | 58 | 2.01E-15 | 72.50%  | 0.104 | IPR029058 (G3DSA:3.40.50.GENE3D); IPR001563 (PFAM); IPR001563 (PANTHER); IPR029058 (SUPERFAMILY)                                                                                                                                        |
| 95  | 153190_length_176_cvg_2.0_tip_1_5   | 0    | enolase partial                                         | 58 | 2.58E-23 | 79.70%  | 0.118 | IPR029065 (G3DSA:3.20.20.GENE3D); IPR020810 (PFAM); IPR000941 (PANTHER); IPR029065 (SUPERFAMILY)                                                                                                                                        |
| 92  | 152440_length_175_cvg_22.6_tip_1_0  | 3    | clipb6 protein                                          | 59 | 8.03E-12 | 66.70%  | 0.127 | IPR001254 (PFAM); G3DSA:2.40.10.10 (GENE3D); PTHR24268:SF72 (PANTHER); PTHR24268 (PANTHER); IPR018114 (PROSITE_PATTERNS); IPR009003 (SUPERFAMILY)                                                                                       |
| 94  | 152988_length_176_cvg_2.0_tip_1_3   | 1    | ensangg00000017398 protein                              | 59 | 2.37E-29 | 95.80%  | 0.099 | IPR013126 (PRINTS); IPR029047 (G3DSA:2.60.34.GENE3D); IPR013126 (PFAM); PTHR19375 (PANTHER); PTHR19375:SF142 (PANTHER); SSF53067 (SUPERFAMILY)                                                                                          |
| 96  | 154172_length_177_cvg_7.1_tip_1_1   | 0    | granzyme a-like                                         | 59 | 6.05E-06 | 55.00%  | 0.1   | G3DSA:2.40.10.10 (GENE3D); IPR001254 (PFAM); IPR009003 (SUPERFAMILY)                                                                                                                                                                    |
| 97  | 154674_length_177_cvg_12.6_tip_1_5  | 0    | carboxypeptidase b-like                                 | 59 | 1.41E-15 | 83.00%  | 0.1   | IPR000834 (PRINTS); G3DSA:3.40.630.10 (GENE3D); IPR000834 (PFAM); PTHR11705 (PANTHER); PTHR11705:SF61 (PANTHER); SSF53187 (SUPERFAMILY)                                                                                                 |
| 98  | 155286_length_178_cvg_2.5_tip_1_2   | 24   | chitinase 2                                             | 59 | 1.01E-09 | 61.90%  | 0.103 | IPR001223 (PFAM); IPR013781 (G3DSA:3.20.20.GENE3D); PTHR11177:SF45 (PANTHER); PTHR11177 (PANTHER); IPR017853 (SUPERFAMILY)                                                                                                              |
| 99  | 155822_length_178_cvg_5.8_tip_1_3   | 1    | ---NA---                                                | 60 |          |         | 0.186 | IPR029058 (G3DSA:3.40.50.GENE3D); IPR001563 (PFAM); IPR029058 (SUPERFAMILY)                                                                                                                                                             |
| 100 | 155898_length_178_cvg_60.3_tip_1_0  | 886  | chitinase partial                                       | 60 | 3.69E-11 | 65.10%  | 0.103 | IPR029070 (G3DSA:3.10.50.GENE3D); IPR029070 (SUPERFAMILY)                                                                                                                                                                               |
| 101 | 157098_length_179_cvg_3.8_tip_1_3   | 0    | serine (or cysteine) proteinase clade b member          | 60 | 3.00E-09 | 65.60%  | 0.119 | IPR023796 (PFAM); G3DSA:2.30.39.10 (GENE3D); IPR000215 (PANTHER); PTHR11461:SF52 (PANTHER); IPR023795 (PROSITE_PATTERNS); IPR023796 (SUPERFAMILY)                                                                                       |
| 102 | 157254_length_179_cvg_84.3_tip_0_3  | 308  | chymotrypsin-like elastase family member 1              | 60 | 8.06E-09 | 61.90%  | 0.113 | IPR001254 (PFAM); G3DSA:2.40.10.10 (GENE3D); PTHR24268 (PANTHER); IPR018114 (PROSITE_PATTERNS); IPR009003 (SUPERFAMILY)                                                                                                                 |
| 103 | 157808_length_179_cvg_35.0_tip_1_3  | 31   | isoform a                                               | 60 | 5.71E-08 | 75.40%  | 0.227 | G3DSA:2.40.10.10 (GENE3D); IPR001254 (PFAM); PTHR24275 (PANTHER); IPR009003 (SUPERFAMILY)                                                                                                                                               |
| 104 | 158144_length_180_cvg_9.0_tip_1_4   | 0    | dermatopontin 3                                         | 60 | 6.99E-10 | 69.20%  | 0.103 | PF14704 (PFAM)                                                                                                                                                                                                                          |
| 105 | 158236_length_180_cvg_62.0_tip_1_4  | 2290 | acidic mammalian chitinase-like isoform x1              | 60 | 1.65E-10 | 64.00%  | 0.133 | IPR013781 (G3DSA:3.20.20.GENE3D); IPR029070 (G3DSA:3.10.50.GENE3D); IPR001223 (PFAM); PTHR11177:SF112 (PANTHER); PTHR11177 (PANTHER); IPR029070 (SUPERFAMILY); IPR017853 (SUPERFAMILY)                                                  |
| 106 | 158352_length_180_cvg_16.3_tip_1_3  | 0    | carboxypeptidase b-like                                 | 60 | 1.40E-16 | 75.70%  | 0.097 | G3DSA:3.40.630.10 (GENE3D); IPR000834 (PFAM); PTHR11705 (PANTHER); SSF53187 (SUPERFAMILY)                                                                                                                                               |
| 107 | 158546_length_180_cvg_3.3_tip_1_2   | 0    | low-density lipoprotein receptor-related protein 2-like | 60 | 3.71E-07 | 58.10%  | 0.114 | IPR002172 (SMART); IPR002172 (PFAM); IPR002172 (G3DSA:4.10.400.GENE3D); IPR002172 (PROSITE_PATTERNS); IPR002172 (PROSITE_PROFILES); IPR002172 (SUPERFAMILY)                                                                             |
| 109 | 159385_length_181_cvg_2.0_tip_1_1   | 0    | nitrate reductase catalytic partial                     | 60 | 8.13E-35 | 100.00% | 0.118 | IPR006656 (PFAM); G3DSA:3.40.228.10 (GENE3D); PTHR11615 (PANTHER); PTHR11615:SF123 (PANTHER); SSF53706 (SUPERFAMILY)                                                                                                                    |
| 110 | 159581_length_181_cvg_62.1_tip_1_4  | 70   | isoform f                                               | 60 | 2.92E-08 | 74.70%  | 0.135 | IPR001223 (PFAM); IPR013781 (G3DSA:3.20.20.GENE3D); IPR017853 (SUPERFAMILY)                                                                                                                                                             |
| 111 | 160585_length_182_cvg_68.7_tip_1_5  | 85   | chitinase                                               | 60 | 2.17E-06 | 71.00%  | 0.115 | IPR013781 (G3DSA:3.20.20.GENE3D); IPR001223 (PFAM); IPR017853 (SUPERFAMILY)                                                                                                                                                             |
| 113 | 161237_length_182_cvg_62.0_tip_1_2  | 48   | chitinase partial                                       | 60 | 5.61E-09 | 71.00%  | 0.102 | IPR013781 (G3DSA:3.20.20.GENE3D); IPR001223 (PFAM); IPR017853 (SUPERFAMILY)                                                                                                                                                             |
| 108 | 159259_length_181_cvg_28.7_tip_1_3  | 9    | low-density lipoprotein receptor-related protein 5      | 61 | 1.64E-07 | 65.30%  | 0.112 | IPR002172 (SMART); IPR002172 (PFAM); IPR002172 (G3DSA:4.10.400.GENE3D); IPR002172 (PROSITE_PATTERNS); IPR002172 (SUPERFAMILY)                                                                                                           |
| 112 | 160629_length_182_cvg_2.0_tip_1_1   | 0    | protein kinase dc2                                      | 61 | 1.28E-33 | 97.40%  | 0.096 | G3DSA:1.10.510.10 (GENE3D); IPR000719 (PFAM); PTHR24353 (PANTHER); IPR008271 (PROSITE_PATTERNS); IPR000719 (PROSITE_PROFILES); IPR011009 (SUPERFAMILY)                                                                                  |
| 114 | 161279_length_182_cvg_2.0_tip_1_3   | 0    | polypeptide n-acetylgalactosaminyltransferase 2         | 61 | 1.39E-22 | 84.80%  | 0.186 | G3DSA:2.80.10.50 (GENE3D); IPR000772 (PFAM); IPR000772 (PROSITE_PROFILES); IPR000772 (SUPERFAMILY)                                                                                                                                      |

|     |                                    |      |                                                               |    |          |        |       |                                                                                                                                                                                                                     |
|-----|------------------------------------|------|---------------------------------------------------------------|----|----------|--------|-------|---------------------------------------------------------------------------------------------------------------------------------------------------------------------------------------------------------------------|
| 115 | 161283_length_182_cvg_60.6_tip_1_3 | 2113 | chitinase partial                                             | 61 | 1.47E-12 | 66.00% | 0.145 | IPR029070 (G3DSA:3.10.50.GENE3D); IPR013781 (G3DSA:3.20.20.GENE3D); IPR001223 (PFAM); PTHR11177 (PANTHER); IPR029070 (SUPERFAMILY); IPR017853 (SUPERFAMILY)                                                         |
| 116 | 161522_length_183_cvg_61.5_tip_1_0 | 11   | af117899_1ldlr-fut fusion protein                             | 61 | 3.81E-06 | 72.67% | 0.217 | IPR002172 (SMART); IPR002172 (G3DSA:4.10.400.GENE3D); IPR002172 (PFAM); IPR023415 (PROSITE_PATTERNS); IPR002172 (PROSITE_PROFILES); IPR002172 (SUPERFAMILY)                                                         |
| 117 | 161528_length_183_cvg_28.8_tip_1_3 | 1    | carboxypeptidase partial                                      | 61 | 2.42E-12 | 63.80% | 0.304 | IPR000834 (PFAM); G3DSA:3.40.630.10 (GENE3D); PTHR11705 (PANTHER); SSF53187 (SUPERFAMILY)                                                                                                                           |
| 118 | 161538_length_183_cvg_56.0_tip_1_2 | 10   | ---NA---                                                      | 61 |          |        | 0.182 | IPR002172 (SMART); IPR002172 (PFAM); IPR002172 (G3DSA:4.10.400.GENE3D); IPR002172 (PROSITE_PROFILES); IPR002172 (SUPERFAMILY)                                                                                       |
| 119 | 161564_length_183_cvg_2.0_tip_1_0  | 0    | molecular chaperone partial                                   | 61 | 3.98E-35 | 99.80% | 0.112 | IPR013126 (PRINTS); IPR013126 (PFAM); G3DSA:3.30.420.40 (GENE3D); PTHR19375 (PANTHER); PTHR19375:SF173 (PANTHER); IPR018181 (PROSITE_PATTERNS); SSF53067 (SUPERFAMILY)                                              |
| 120 | 161578_length_183_cvg_53.2_tip_1_5 | 9    | serine protease 57                                            | 61 | 3.31E-06 | 58.30% | 0.103 | IPR001254 (PFAM); G3DSA:2.40.10.10 (GENE3D); IPR018114 (PROSITE_PATTERNS); IPR009003 (SUPERFAMILY)                                                                                                                  |
| 121 | 161584_length_183_cvg_19.2_tip_1_2 | 2    | chymotrypsin-like elastase family member 2a                   | 61 | 3.78E-06 | 63.50% | 0.136 | IPR001254 (PFAM); G3DSA:2.40.10.10 (GENE3D); IPR009003 (SUPERFAMILY)                                                                                                                                                |
| 122 | 161654_length_183_cvg_61.0_tip_1_0 | 59   | chitinase partial                                             | 61 | 5.12E-12 | 61.30% | 0.101 | IPR013781 (G3DSA:3.20.20.GENE3D); IPR001223 (PFAM); IPR017853 (SUPERFAMILY)                                                                                                                                         |
| 123 | 161700_length_183_cvg_62.0_tip_1_1 | 49   | chitinase 2                                                   | 61 | 2.46E-11 | 62.80% | 0.104 | IPR001223 (PFAM); IPR013781 (G3DSA:3.20.20.GENE3D); IPR001579 (PROSITE_PATTERNS); IPR017853 (SUPERFAMILY)                                                                                                           |
| 124 | 161704_length_183_cvg_31.8_tip_1_4 | 8    | secreted salivary gland                                       | 61 | 1.52E-10 | 68.70% | 0.112 | G3DSA:2.40.10.10 (GENE3D); IPR001254 (PFAM); PTHR24256 (PANTHER); IPR009003 (SUPERFAMILY)                                                                                                                           |
| 125 | 161716_length_183_cvg_45.2_tip_1_1 | 21   | low-density lipoprotein receptor-related protein 2-like       | 61 | 5.32E-08 | 61.10% | 0.098 | IPR002172 (PRINTS); IPR002172 (SMART); IPR002172 (G3DSA:4.10.400.GENE3D); IPR002172 (PFAM); IPR002172 (G3DSA:4.10.400.GENE3D); IPR023415 (PROSITE_PATTERNS); IPR002172 (PROSITE_PROFILES); IPR002172 (SUPERFAMILY)  |
| 126 | 161752_length_183_cvg_61.8_tip_1_1 | 59   | chitotriosidase- partial                                      | 61 | 4.14E-09 | 61.60% | 0.1   | IPR013781 (G3DSA:3.20.20.GENE3D); IPR001223 (PFAM); IPR017853 (SUPERFAMILY)                                                                                                                                         |
| 127 | 161762_length_183_cvg_35.3_tip_1_1 | 260  | st14a protein                                                 | 61 | 5.27E-08 | 64.70% | 0.112 | G3DSA:2.40.10.10 (GENE3D); IPR001254 (PFAM); IPR009003 (SUPERFAMILY)                                                                                                                                                |
| 128 | 161782_length_183_cvg_61.0_tip_1_2 | 10   | ---NA---                                                      | 61 |          |        | 0.21  | G3DSA:2.40.10.10 (GENE3D); IPR001254 (PFAM); IPR009003 (SUPERFAMILY)                                                                                                                                                |
| 129 | 161822_length_183_cvg_61.0_tip_1_4 | 75   | chitinase 3                                                   | 61 | 2.04E-09 | 62.40% | 0.119 | IPR013781 (G3DSA:3.20.20.GENE3D); IPR001223 (PFAM); IPR017853 (SUPERFAMILY)                                                                                                                                         |
| 130 | 161826_length_183_cvg_28.4_tip_1_1 | 3    | neurotrypsin- partial                                         | 61 | 1.19E-10 | 68.90% | 0.134 | IPR001254 (PFAM); G3DSA:2.40.10.10 (GENE3D); PTHR24256 (PANTHER); IPR001254 (PROSITE_PROFILES); IPR009003 (SUPERFAMILY)                                                                                             |
| 131 | 161830_length_183_cvg_50.6_tip_1_5 | 216  | low-density lipoprotein receptor-related protein 8            | 61 | 1.97E-11 | 65.00% | 0.101 | IPR002172 (SMART); IPR002172 (G3DSA:4.10.400.GENE3D); IPR002172 (PFAM); IPR002172 (G3DSA:4.10.400.GENE3D); PTHR10529 (PANTHER); IPR002172 (PROSITE_PROFILES); IPR002172 (SUPERFAMILY); IPR002172 (SUPERFAMILY)      |
| 132 | 161832_length_183_cvg_11.7_tip_1_5 | 2    | low quality protein: serine protease 55                       | 61 | 8.65E-08 | 67.20% | 0.108 | IPR001254 (PFAM); G3DSA:2.40.10.10 (GENE3D); IPR018114 (PROSITE_PATTERNS); IPR009003 (SUPERFAMILY)                                                                                                                  |
| 133 | 161836_length_183_cvg_31.9_tip_1_4 | 159  | low-density lipoprotein receptor-related protein 6 isoform x2 | 61 | 5.06E-10 | 68.30% | 0.103 | IPR002172 (SMART); IPR002172 (PFAM); IPR002172 (G3DSA:4.10.400.GENE3D); IPR002172 (G3DSA:4.10.400.GENE3D); PTHR10529 (PANTHER); IPR023415 (PROSITE_PATTERNS); IPR002172 (PROSITE_PROFILES); IPR002172 (SUPERFAMILY) |
| 134 | 161868_length_183_cvg_38.4_tip_1_4 | 6    | chitinase 1                                                   | 61 | 1.02E-08 | 65.70% | 0.174 | IPR013781 (G3DSA:3.20.20.GENE3D); IPR017853 (SUPERFAMILY)                                                                                                                                                           |
| 135 | 161874_length_183_cvg_45.0_tip_1_3 | 2    | chymotrypsin-like elastase family member 2a                   | 61 | 2.26E-08 | 59.70% | 0.136 | IPR001254 (PFAM); G3DSA:2.40.10.10 (GENE3D); PTHR24258:SF97 (PANTHER); PTHR24258 (PANTHER); IPR018114 (PROSITE_PATTERNS); IPR009003 (SUPERFAMILY)                                                                   |
| 136 | 161882_length_183_cvg_19.6_tip_1_3 | 2    | zinc carboxypeptidase-like                                    | 61 | 1.05E-15 | 67.40% | 0.117 | G3DSA:3.40.630.10 (GENE3D); IPR000834 (PFAM); PTHR11705 (PANTHER); SSF53187 (SUPERFAMILY)                                                                                                                           |
| 137 | 161896_length_183_cvg_28.4_tip_1_2 | 185  | transmembrane protease serine 11b                             | 61 | 4.84E-07 | 61.80% | 0.106 | G3DSA:2.40.10.10 (GENE3D); IPR001254 (PFAM); PTHR24268:SF72 (PANTHER); PTHR24268 (PANTHER); IPR009003 (SUPERFAMILY)                                                                                                 |
| 138 | 161916_length_183_cvg_31.2_tip_1_2 | 5    | suppressor of tumorigenicity 14 protein                       | 61 | 6.65E-12 | 66.00% | 0.193 | IPR001254 (PFAM); G3DSA:2.40.10.10 (GENE3D); PTHR24268 (PANTHER); IPR009003 (SUPERFAMILY)                                                                                                                           |
| 139 | 161948_length_183_cvg_44.6_tip_1_5 | 10   | ---NA---                                                      | 61 |          |        | 0.204 | IPR001254 (PFAM); G3DSA:2.40.10.10 (GENE3D); IPR009003 (SUPERFAMILY)                                                                                                                                                |
| 140 | 161960_length_183_cvg_10.2_tip_1_2 | 2    | ---NA---                                                      | 61 |          |        | 0.098 | G3DSA:2.40.10.10 (GENE3D); IPR001254 (PFAM); IPR009003 (SUPERFAMILY)                                                                                                                                                |
| 141 | 161966_length_183_cvg_48.8_tip_1_1 | 2    | transmembrane protease serine 11e                             | 61 | 4.25E-10 | 68.30% | 0.134 | IPR001254 (PFAM); G3DSA:2.40.10.10 (GENE3D); PTHR24275 (PANTHER); IPR018114 (PROSITE_PATTERNS); IPR001254 (PROSITE_PROFILES); IPR009003 (SUPERFAMILY)                                                               |
| 142 | 162006_length_183_cvg_34.0_tip_1_2 | 4    | complement c1s subcomponent                                   | 61 | 1.27E-06 | 66.50% | 0.106 | IPR001254 (PFAM); G3DSA:2.40.10.10 (GENE3D); PTHR24265 (PANTHER); IPR009003 (SUPERFAMILY)                                                                                                                           |
| 143 | 162010_length_183_cvg_39.7_tip_1_4 | 1    | chymotrypsin-like elastase family member 2b                   | 61 | 1.50E-09 | 66.70% | 0.103 | IPR001254 (PFAM); G3DSA:2.40.10.10 (GENE3D); PTHR24258:SF97 (PANTHER); PTHR24258 (PANTHER); IPR009003 (SUPERFAMILY)                                                                                                 |
| 144 | 162012_length_183_cvg_61.0_tip_1_1 | 54   | chitinase 7 precursor                                         | 61 | 3.09E-08 | 61.60% | 0.177 | IPR013781 (G3DSA:3.20.20.GENE3D); IPR017853 (SUPERFAMILY)                                                                                                                                                           |

|     |                                    |      |                                                                         |    |          |        |       |                                                                                                                                                                                                                                                                       |
|-----|------------------------------------|------|-------------------------------------------------------------------------|----|----------|--------|-------|-----------------------------------------------------------------------------------------------------------------------------------------------------------------------------------------------------------------------------------------------------------------------|
| 145 | 162022_length_183_cvg_61.0_tip_1_5 | 48   | chitinase partial                                                       | 61 | 4.45E-08 | 68.00% | 0.1   | IPR013781 (G3DSA:3.20.20.GENE3D); IPR001223 (PFAM); IPR017853 (SUPERFAMILY)                                                                                                                                                                                           |
| 146 | 162030_length_183_cvg_43.2_tip_1_1 | 204  | isoform a                                                               | 61 | 3.64E-07 | 64.20% | 0.109 | G3DSA:2.40.10.10 (GENE3D); IPR001254 (PFAM); IPR009003 (SUPERFAMILY)                                                                                                                                                                                                  |
| 147 | 162038_length_183_cvg_60.2_tip_1_1 | 43   | chitinase partial                                                       | 61 | 2.71E-12 | 68.60% | 0.131 | IPR001223 (PFAM); IPR013781 (G3DSA:3.20.20.GENE3D); IPR017853 (SUPERFAMILY)                                                                                                                                                                                           |
| 148 | 162040_length_183_cvg_60.2_tip_1_1 | 40   | chitinase partial                                                       | 61 | 1.71E-11 | 61.50% | 0.105 | IPR013781 (G3DSA:3.20.20.GENE3D); IPR001223 (PFAM); PTHR11177:SF112 (PANTHER); PTHR11177 (PANTHER); IPR017853 (SUPERFAMILY)                                                                                                                                           |
| 149 | 162062_length_183_cvg_2.0_tip_1_2  | 0    | zinc finger protein 2 homolog                                           | 61 | 5.30E-17 | 72.60% | 0.162 | IPR015880 (SMART); PF13465 (PFAM); IPR013087 (G3DSA:3.30.160.GENE3D); IPR013087 (G3DSA:3.30.160.GENE3D); IPR007087 (PFAM); IPR013087 (G3DSA:3.30.160.GENE3D); PTHR24409 (PANTHER); IPR007087 (PROSITE_PATTERNS); IPR007087 (PROSITE_PROFILES); SSF57667 (SUPERFAMILY) |
| 150 | 162120_length_183_cvg_60.8_tip_1_4 | 53   | chitinase partial                                                       | 61 | 1.11E-10 | 70.00% | 0.101 | IPR013781 (G3DSA:3.20.20.GENE3D); IPR001223 (PFAM); IPR017853 (SUPERFAMILY)                                                                                                                                                                                           |
| 151 | 162144_length_183_cvg_29.7_tip_1_3 | 11   | serine proteinase stubble-like                                          | 61 | 6.27E-10 | 61.00% | 0.1   | IPR001254 (PFAM); G3DSA:2.40.10.10 (GENE3D); PTHR24256 (PANTHER); IPR009003 (SUPERFAMILY)                                                                                                                                                                             |
| 152 | 162178_length_183_cvg_60.0_tip_1_5 | 1107 | chitinase isoform a                                                     | 61 | 6.04E-16 | 63.30% | 0.101 | IPR001223 (PFAM); IPR013781 (G3DSA:3.20.20.GENE3D); PTHR11177 (PANTHER); PTHR11177:SF45 (PANTHER); IPR001579 (PROSITE_PATTERNS); IPR017853 (SUPERFAMILY)                                                                                                              |
| 153 | 162186_length_183_cvg_28.7_tip_1_2 | 0    | venom serine carboxypeptidase-like                                      | 61 | 2.68E-17 | 68.00% | 0.128 | IPR029058 (G3DSA:3.40.50.GENE3D); IPR001563 (PFAM); IPR001563 (PANTHER); IPR029058 (SUPERFAMILY)                                                                                                                                                                      |
| 154 | 162190_length_183_cvg_53.6_tip_1_3 | 13   | low-density lipoprotein receptor-related protein 6 isoform x2           | 61 | 2.55E-11 | 69.00% | 0.102 | IPR002172 (SMART); IPR002172 (PFAM); IPR002172 (G3DSA:4.10.400.GENE3D); PTHR10529 (PANTHER); IPR023415 (PROSITE_PATTERNS); IPR002172 (PROSITE_PROFILES); IPR002172 (SUPERFAMILY)                                                                                      |
| 155 | 162220_length_183_cvg_61.0_tip_1_1 | 82   | chitinase 2                                                             | 61 | 1.69E-12 | 64.10% | 0.101 | IPR013781 (G3DSA:3.20.20.GENE3D); IPR001223 (PFAM); PTHR11177 (PANTHER); PTHR11177:SF45 (PANTHER); IPR001579 (PROSITE_PATTERNS); IPR017853 (SUPERFAMILY)                                                                                                              |
| 156 | 162266_length_183_cvg_31.0_tip_1_2 | 480  | low-density lipoprotein receptor-related protein 2                      | 61 | 1.85E-09 | 64.90% | 0.099 | IPR002172 (PRINTS); IPR002172 (SMART); G3DSA:4.10.1220.10 (GENE3D); IPR002172 (PFAM); IPR002172 (G3DSA:4.10.400.GENE3D); PTHR10529 (PANTHER); IPR002172 (PROSITE_PROFILES); IPR002172 (PROSITE_PROFILES); IPR002172 (SUPERFAMILY); IPR002172 (SUPERFAMILY)            |
| 157 | 162286_length_183_cvg_7.8_tip_1_1  | 0    | ---NA---                                                                | 61 |          |        | 0.123 | IPR014044 (G3DSA:3.40.33.GENE3D); IPR014044 (PFAM); IPR014044 (SUPERFAMILY)                                                                                                                                                                                           |
| 158 | 162410_length_183_cvg_26.2_tip_1_3 | 26   | sortilin-related receptor containing ldlr class a repeats preproprotein | 61 | 1.43E-06 | 62.00% | 0.1   | IPR002172 (SMART); IPR002172 (G3DSA:4.10.400.GENE3D); IPR002172 (PFAM); IPR023415 (PROSITE_PATTERNS); IPR002172 (PROSITE_PROFILES); IPR002172 (SUPERFAMILY)                                                                                                           |
| 159 | 162414_length_183_cvg_33.6_tip_1_5 | 1    | serine protease like protein                                            | 61 | 1.45E-12 | 64.50% | 0.164 | IPR001254 (PFAM); G3DSA:2.40.10.10 (GENE3D); PTHR24268 (PANTHER); PTHR24268:SF72 (PANTHER); IPR018114 (PROSITE_PATTERNS); IPR009003 (SUPERFAMILY)                                                                                                                     |
| 160 | 162434_length_183_cvg_60.2_tip_1_3 | 54   | chitinase partial                                                       | 61 | 2.63E-09 | 59.30% | 0.1   | IPR013781 (G3DSA:3.20.20.GENE3D); IPR001223 (PFAM); IPR017853 (SUPERFAMILY)                                                                                                                                                                                           |
| 161 | 162440_length_183_cvg_56.0_tip_1_4 | 11   | granzyme a-like                                                         | 61 | 5.72E-06 | 58.00% | 0.112 | IPR001254 (PFAM); G3DSA:2.40.10.10 (GENE3D); IPR009003 (SUPERFAMILY)                                                                                                                                                                                                  |
| 162 | 162452_length_183_cvg_61.0_tip_1_3 | 9    | low-density lipoprotein receptor-related protein 2-like                 | 61 | 5.69E-13 | 68.00% | 0.11  | IPR002172 (PRINTS); IPR002172 (SMART); IPR002172 (PFAM); IPR002172 (G3DSA:4.10.400.GENE3D); IPR002172 (G3DSA:4.10.400.GENE3D); PTHR10529 (PANTHER); PTHR10529:SF222 (PANTHER); IPR002172 (PROSITE_PROFILES); IPR002172 (SUPERFAMILY); IPR002172 (SUPERFAMILY)         |
| 163 | 162472_length_183_cvg_36.9_tip_1_0 | 0    | chitinase partial                                                       | 61 | 1.27E-16 | 71.70% | 0.156 | IPR001223 (PFAM); IPR029070 (G3DSA:3.10.50.GENE3D); IPR013781 (G3DSA:3.20.20.GENE3D); PTHR11177 (PANTHER); IPR017853 (SUPERFAMILY); IPR029070 (SUPERFAMILY)                                                                                                           |
| 164 | 162496_length_183_cvg_59.6_tip_1_1 | 53   | isoform k                                                               | 61 | 7.61E-13 | 65.40% | 0.108 | IPR013781 (G3DSA:3.20.20.GENE3D); IPR001223 (PFAM); PTHR11177:SF45 (PANTHER); PTHR11177 (PANTHER); IPR017853 (SUPERFAMILY)                                                                                                                                            |
| 165 | 162544_length_183_cvg_18.6_tip_1_1 | 3    | carboxypeptidase b                                                      | 61 | 1.36E-10 | 62.90% | 0.139 | G3DSA:3.40.630.10 (GENE3D); IPR000834 (PFAM); PTHR11705 (PANTHER); SSF53187 (SUPERFAMILY)                                                                                                                                                                             |
| 166 | 162546_length_183_cvg_60.0_tip_1_0 | 405  | clip-domain serine protease                                             | 61 | 3.46E-06 | 77.33% | 0.313 | G3DSA:2.40.10.10 (GENE3D); IPR001254 (PFAM); PTHR24275 (PANTHER); IPR009003 (SUPERFAMILY)                                                                                                                                                                             |
| 167 | 162564_length_183_cvg_41.0_tip_1_0 | 266  | transcription activator brg1                                            | 61 | 2.25E-10 | 66.10% | 0.1   | IPR002172 (SMART); IPR002172 (G3DSA:4.10.400.GENE3D); IPR002172 (PFAM); IPR002172 (G3DSA:4.10.400.GENE3D); IPR023415 (PROSITE_PATTERNS); IPR002172 (PROSITE_PROFILES); IPR002172 (SUPERFAMILY)                                                                        |
| 168 | 162574_length_183_cvg_41.7_tip_1_5 | 156  | sortilin-related receptor- partial                                      | 61 | 3.67E-08 | 59.30% | 0.101 | IPR002172 (SMART); IPR002172 (PFAM); G3DSA:4.10.1220.10 (GENE3D); IPR002172 (G3DSA:4.10.400.GENE3D); IPR002172 (PROSITE_PROFILES); IPR002172 (SUPERFAMILY)                                                                                                            |

|     |                                    |     |                                                                |    |          |         |       |                                                                                                                                                                                                           |
|-----|------------------------------------|-----|----------------------------------------------------------------|----|----------|---------|-------|-----------------------------------------------------------------------------------------------------------------------------------------------------------------------------------------------------------|
| 169 | 162596_length_183_cvg_26.1_tip_1_0 | 4   | chymotrypsin-like elastase family member 1                     | 61 | 1.52E-07 | 62.10%  | 0.145 | G3DSA:2.40.10.10 (GENE3D); IPR001254 (PFAM); PTHR24258 (PANTHER); PTHR24258:SF97 (PANTHER); IPR018114 (PROSITE_PATTERNS); IPR009003 (SUPERFAMILY)                                                         |
| 170 | 162598_length_183_cvg_31.2_tip_1_4 | 9   | granzyme a-like                                                | 61 | 4.74E-08 | 60.90%  | 0.106 | G3DSA:2.40.10.10 (GENE3D); IPR001254 (PFAM); IPR009003 (SUPERFAMILY)                                                                                                                                      |
| 171 | 162640_length_183_cvg_35.5_tip_1_3 | 3   | plasma kallikrein                                              | 61 | 5.08E-08 | 61.60%  | 0.123 | IPR001254 (PFAM); G3DSA:2.40.10.10 (GENE3D); PTHR24250 (PANTHER); PTHR24250:SF6 (PANTHER); IPR018114 (PROSITE_PATTERNS); IPR009003 (SUPERFAMILY)                                                          |
| 172 | 162682_length_183_cvg_60.2_tip_1_1 | 36  | chitinase partial                                              | 61 | 1.59E-12 | 65.20%  | 0.107 | IPR001223 (PFAM); IPR013781 (G3DSA:3.20.20.GENE3D); PTHR11177:SF112 (PANTHER); PTHR11177 (PANTHER); IPR001579 (PROSITE_PATTERNS); IPR017853 (SUPERFAMILY)                                                 |
| 173 | 162776_length_183_cvg_60.0_tip_1_5 | 40  | chitinase partial                                              | 61 | 1.93E-10 | 71.00%  | 0.101 | IPR013781 (G3DSA:3.20.20.GENE3D); IPR001223 (PFAM); IPR017853 (SUPERFAMILY)                                                                                                                               |
| 174 | 162800_length_183_cvg_61.0_tip_1_5 | 11  | suppressor of tumorigenicity 14 protein                        | 61 | 5.42E-09 | 67.80%  | 0.13  | G3DSA:2.40.10.10 (GENE3D); IPR001254 (PFAM); PTHR24256 (PANTHER); IPR009003 (SUPERFAMILY)                                                                                                                 |
| 175 | 162816_length_183_cvg_60.0_tip_1_2 | 66  | isoform h                                                      | 61 | 2.01E-13 | 67.80%  | 0.12  | IPR013781 (G3DSA:3.20.20.GENE3D); IPR001223 (PFAM); PTHR11177 (PANTHER); IPR017853 (SUPERFAMILY)                                                                                                          |
| 176 | 162826_length_183_cvg_42.6_tip_1_2 | 14  | low-density lipoprotein receptor-related protein 2-<br>partial | 61 | 2.23E-10 | 63.60%  | 0.097 | IPR002172 (PRINTS); G3DSA:4.10.1220.10 (GENE3D); IPR002172 (PFAM); IPR002172 (G3DSA:4.10.400.GENE3D); PTHR10529 (PANTHER); IPR002172 (PROSITE_PROFILES); IPR002172 (SUPERFAMILY); IPR002172 (SUPERFAMILY) |
| 177 | 162828_length_183_cvg_59.3_tip_1_5 | 32  | chitinase partial                                              | 61 | 2.48E-09 | 68.10%  | 0.118 | IPR013781 (G3DSA:3.20.20.GENE3D); IPR017853 (SUPERFAMILY)                                                                                                                                                 |
| 178 | 163819_length_184_cvg_84.4_tip_1_5 | 6   | carboxypeptidase a2-like                                       | 61 | 4.06E-15 | 76.80%  | 0.106 | IPR000834 (PFAM); G3DSA:3.40.630.10 (GENE3D); PTHR11705 (PANTHER); SSF53187 (SUPERFAMILY)                                                                                                                 |
| 179 | 164537_length_185_cvg_62.0_tip_1_0 | 239 | probable chitinase 3                                           | 62 | 4.12E-13 | 68.60%  | 0.144 | IPR013781 (G3DSA:3.20.20.GENE3D); IPR001223 (PFAM); IPR017853 (SUPERFAMILY)                                                                                                                               |
| 180 | 164579_length_185_cvg_14.9_tip_1_4 | 67  | chitinase isoform a                                            | 62 | 1.38E-12 | 63.30%  | 0.106 | IPR013781 (G3DSA:3.20.20.GENE3D); IPR001223 (PFAM); PTHR11177 (PANTHER); PTHR11177:SF45 (PANTHER); IPR017853 (SUPERFAMILY)                                                                                |
| 181 | 164733_length_185_cvg_59.0_tip_1_3 | 60  | isoform h                                                      | 62 | 1.09E-13 | 66.30%  | 0.116 | IPR013781 (G3DSA:3.20.20.GENE3D); IPR001223 (PFAM); PTHR11177 (PANTHER); IPR017853 (SUPERFAMILY)                                                                                                          |
| 182 | 165047_length_185_cvg_58.7_tip_1_4 | 69  | brain chitinase and chia                                       | 62 | 7.44E-09 | 63.50%  | 0.104 | IPR001223 (PFAM); IPR013781 (G3DSA:3.20.20.GENE3D); PTHR11177:SF45 (PANTHER); PTHR11177 (PANTHER); IPR001579 (PROSITE_PATTERNS); IPR017853 (SUPERFAMILY)                                                  |
| 183 | 165415_length_186_cvg_2.0_tip_1_4  | 2   | outer membrane autotransporter barrel domain<br>protein        | 62 | 1.21E-33 | 100.00% | 0.111 | IPR005546 (PFAM); IPR005546 (G3DSA:2.40.128.GENE3D); IPR005546 (SUPERFAMILY)                                                                                                                              |
| 184 | 165911_length_186_cvg_36.8_tip_1_0 | 37  | neurotrypsin- partial                                          | 62 | 7.20E-07 | 64.57%  | 0.138 | G3DSA:2.40.10.10 (GENE3D); IPR001254 (PFAM); IPR018114 (PROSITE_PATTERNS); IPR009003 (SUPERFAMILY)                                                                                                        |
| 185 | 167307_length_187_cvg_56.7_tip_1_1 | 87  | peptidase s1 and s6 chymotrypsin hap                           | 62 | 1.51E-11 | 73.40%  | 0.163 | G3DSA:2.40.10.10 (GENE3D); IPR001254 (PFAM); PTHR24275 (PANTHER); IPR018114 (PROSITE_PATTERNS); IPR001254 (PROSITE_PROFILES); IPR009003 (SUPERFAMILY)                                                     |
| 186 | 168596_length_188_cvg_19.3_tip_1_4 | 2   | low quality protein: probable chitinase 3                      | 63 | 1.09E-13 | 70.50%  | 0.103 | IPR013781 (G3DSA:3.20.20.GENE3D); IPR017853 (SUPERFAMILY)                                                                                                                                                 |
| 187 | 168688_length_189_cvg_13.0_tip_1_4 | 0   | leukocyte elastase inhibitor                                   | 63 | 2.20E-09 | 72.10%  | 0.133 | G3DSA:2.30.39.10 (GENE3D); IPR023796 (PFAM); IPR000215 (PANTHER); IPR023795 (PROSITE_PATTERNS); IPR023796 (SUPERFAMILY)                                                                                   |
| 188 | 170656_length_190_cvg_2.0_tip_1_4  | 0   | hypothetical protein DAPPUDRAFT_317027                         | 63 | 5.33E-08 | 62.00%  | 0.135 | IPR015420 (PFAM); G3DSA:2.40.10.10 (GENE3D); IPR009003 (SUPERFAMILY)                                                                                                                                      |
| 189 | 171606_length_191_cvg_16.8_tip_1_5 | 1   | ---NA---                                                       | 63 |          |         | 0.103 | IPR002172 (SMART); IPR002172 (G3DSA:4.10.400.GENE3D); IPR002172 (PFAM); IPR002172 (PROSITE_PROFILES); IPR002172 (SUPERFAMILY)                                                                             |
| 190 | 172110_length_192_cvg_2.0_tip_1_1  | 0   | nad h:quinone oxidoreductase                                   | 64 | 1.27E-35 | 99.20%  | 0.156 | IPR029039 (G3DSA:3.40.50.GENE3D); PTHR30546 (PANTHER); IPR029039 (SUPERFAMILY)                                                                                                                            |
| 192 | 174052_length_193_cvg_5.8_tip_1_4  | 0   | suppressor of tumorigenicity 14 protein                        | 64 | 3.11E-11 | 72.70%  | 0.134 | G3DSA:2.40.10.10 (GENE3D); IPR001254 (PFAM); PTHR24256 (PANTHER); IPR009003 (SUPERFAMILY)                                                                                                                 |
| 193 | 174474_length_194_cvg_2.0_tip_1_2  | 0   | chitinase partial                                              | 64 | 2.02E-06 | 47.00%  | 0.166 | IPR029070 (G3DSA:3.10.50.GENE3D)                                                                                                                                                                          |
| 191 | 173640_length_193_cvg_2.0_tip_1_0  | 0   | lysyl-trna synthetase                                          | 65 | 1.04E-28 | 90.80%  | 0.102 | IPR004364 (PFAM); G3DSA:3.30.930.10 (GENE3D); PTHR22594:SF25 (PANTHER); IPR018150 (PANTHER); IPR006195 (PROSITE_PROFILES); SSF55681 (SUPERFAMILY)                                                         |
| 194 | 176070_length_195_cvg_63.0_tip_1_4 | 0   | allergen 5                                                     | 65 | 5.04E-13 | 74.80%  | 0.128 | IPR002413 (PRINTS); IPR014044 (G3DSA:3.40.33.GENE3D); IPR014044 (SUPERFAMILY)                                                                                                                             |
| 195 | 176198_length_195_cvg_56.2_tip_1_2 | 9   | chymotrypsin-like elastase family member partial               | 65 | 2.17E-10 | 66.40%  | 0.259 | IPR001254 (PFAM); G3DSA:2.40.10.10 (GENE3D); PTHR24275 (PANTHER); IPR018114 (PROSITE_PATTERNS); IPR009003 (SUPERFAMILY)                                                                                   |
| 196 | 176208_length_195_cvg_7.3_tip_1_4  | 4   | serine protease                                                | 65 | 2.59E-08 | 69.80%  | 0.119 | IPR001254 (PFAM); G3DSA:2.40.10.10 (GENE3D); PTHR24268:SF81 (PANTHER); PTHR24268 (PANTHER); IPR018114 (PROSITE_PATTERNS); IPR009003 (SUPERFAMILY)                                                         |
| 197 | 177798_length_197_cvg_3.1_tip_1_5  | 0   | serine protease                                                | 65 | 2.50E-09 | 64.40%  | 0.104 | IPR001254 (PFAM); G3DSA:2.40.10.10 (GENE3D); PTHR24268 (PANTHER); IPR018114 (PROSITE_PATTERNS); IPR009003 (SUPERFAMILY)                                                                                   |



|     |                                     |      |                                                                                     |    |          |         |         |                                                                                                                                                                                                                                                                     |
|-----|-------------------------------------|------|-------------------------------------------------------------------------------------|----|----------|---------|---------|---------------------------------------------------------------------------------------------------------------------------------------------------------------------------------------------------------------------------------------------------------------------|
| 198 | 178412_length_197_cvg_84.0_tip_1_0  | 1163 | trypsin-like protease                                                               | 66 | 9.40E-08 | 61.70%  | 0.135   | G3DSA:2.40.10.10 (GENE3D); IPR001254 (PFAM); PTHR24275 (PANTHER); IPR018114 (PROSITE_PATTERNS); IPR001254 (PROSITE_PROFILES); IPR009003 (SUPERFAMILY)                                                                                                               |
| 199 | 178612_length_198_cvg_63.8_tip_0_3  | 2    | gamma-glutamyl hydrolase                                                            | 66 | 4.32E-15 | 63.80%  | 0.098   | IPR029062 (G3DSA:3.40.50.GENE3D); PTHR11315:SF0 (PANTHER); IPR015527 (PANTHER)                                                                                                                                                                                      |
| 200 | 179098_length_198_cvg_2.0_tip_1_4   | 0    | udp- c:polypeptide n-                                                               | 66 | 5.24E-07 | 82.90%  | 0.112   | no IPS match                                                                                                                                                                                                                                                        |
| 201 | 181240_length_200_cvg_71.2_tip_0_3  | 698  | proclotting enzyme                                                                  | 67 | 9.68E-14 | 69.40%  | 0.103   | IPR001254 (PFAM); G3DSA:2.40.10.10 (GENE3D); PTHR24256 (PANTHER); IPR001254 (PROSITE_PROFILES); IPR009003 (SUPERFAMILY)                                                                                                                                             |
| 202 | 181262_length_200_cvg_2.4_tip_1_1   | 0    | hypothetical protein Y032_0473g2095                                                 | 67 | 1.99E-10 | 66.20%  | 0.109   | no IPS match                                                                                                                                                                                                                                                        |
| 203 | 181788_length_201_cvg_2.0_tip_1_1   | 0    | alpha-amylase                                                                       | 67 | 1.55E-39 | 99.60%  | 0.158   | IPR013781 (G3DSA:3.20.20.GENE3D); IPR017853 (SUPERFAMILY)                                                                                                                                                                                                           |
| 204 | 181916_length_201_cvg_60.9_tip_1_1  | 41   | chitinase-3-like protein 1                                                          | 67 | 9.48E-14 | 65.40%  | 0.12    | IPR001223 (PFAM); IPR013781 (G3DSA:3.20.20.GENE3D); PTHR11177 (PANTHER); IPR017853 (SUPERFAMILY)                                                                                                                                                                    |
| 205 | 182700_length_202_cvg_2.0_tip_1_1   | 0    | zinc finger protein 501-like                                                        | 67 | 5.59E-09 | 69.60%  | 0.1     | IPR015880 (SMART); PF13465 (PFAM); IPR013087 (G3DSA:3.30.160.GENE3D); PTHR24409 (PANTHER); PTHR24409:SF14 (PANTHER); IPR007087 (PROSITE_PATTERNS); IPR007087 (PROSITE_PATTERNS); IPR007087 (PROSITE_PROFILES); IPR007087 (PROSITE_PROFILES); SSF57667 (SUPERFAMILY) |
| 206 | 183980_length_203_cvg_120.8_tip_1_3 | 15   | venom allergen partial                                                              | 68 | 3.67E-11 | 61.60%  | 0.117   | IPR001283 (PRINTS); IPR014044 (PFAM); IPR014044 (G3DSA:3.40.33.GENE3D); IPR001283 (PANTHER); IPR018244 (PROSITE_PATTERNS); IPR014044 (SUPERFAMILY)                                                                                                                  |
| 207 | 184866_length_204_cvg_85.6_tip_1_1  | 22   | urokinase-type plasminogen activator                                                | 68 | 2.57E-12 | 69.00%  | 0.14    | G3DSA:2.40.10.10 (GENE3D); IPR001254 (PFAM); PTHR24265:SF76 (PANTHER); PTHR24265 (PANTHER); IPR001254 (PROSITE_PROFILES); IPR009003 (SUPERFAMILY)                                                                                                                   |
| 208 | 184962_length_204_cvg_2.0_tip_1_4   | 0    | endothelin-converting enzyme 1-like                                                 | 68 | 4.75E-20 | 83.60%  | 0.118   | IPR024079 (G3DSA:3.40.390.GENE3D); IPR018497 (PFAM); PTHR11733:SF110 (PANTHER); IPR000718 (PANTHER); SSF55486 (SUPERFAMILY)                                                                                                                                         |
| 210 | 186520_length_205_cvg_61.0_tip_1_1  | 47   | chitotriosidase- partial                                                            | 68 | 1.31E-14 | 62.40%  | 0.104   | IPR029070 (G3DSA:3.10.50.GENE3D); IPR001223 (PFAM); IPR013781 (G3DSA:3.20.20.GENE3D); PTHR11177 (PANTHER); PTHR11177:SF45 (PANTHER); IPR017853 (SUPERFAMILY)                                                                                                        |
| 209 | 186108_length_205_cvg_2.0_tip_1_0   | 0    | serine threonine-protein kinase mark2-like isoform x10                              | 69 | 6.33E-39 | 99.80%  | 0.109   | G3DSA:3.30.200.20 (GENE3D); IPR000719 (PFAM); PTHR24346 (PANTHER); IPR008271 (PROSITE_PATTERNS); IPR000719 (PROSITE_PROFILES); IPR011009 (SUPERFAMILY)                                                                                                              |
| 211 | 190393_length_209_cvg_9.0_tip_1_2   | 0    | lysosomal acid phosphatase                                                          | 69 | 4.69E-14 | 71.00%  | 0.517 Y | IPR000560 (PFAM); IPR029033 (G3DSA:3.40.50.GENE3D); PTHR11567:SF26 (PANTHER); PTHR11567 (PANTHER); IPR000560 (PROSITE_PATTERNS); SignalP-noTM (SIGNALP_EUK); IPR029033 (SUPERFAMILY)                                                                                |
| 212 | 190901_length_209_cvg_2.0_tip_1_5   | 0    | von willebrand factor type egf and pentraxin domain-containing protein 1 isoform x1 | 69 | 1.06E-19 | 77.50%  | 0.128   | IPR011641 (PFAM); G3DSA:2.10.50.10 (GENE3D); PTHR24049:SF6 (PANTHER); PTHR24049 (PANTHER); IPR009030 (SUPERFAMILY)                                                                                                                                                  |
| 346 | 288445_length_332_cvg_4.5_tip_1_0   | 1    | chitinase 7 precursor                                                               | 69 | 3.13E-09 | 61.90%  | 0.101   | IPR013781 (G3DSA:3.20.20.GENE3D)                                                                                                                                                                                                                                    |
| 213 | 191679_length_210_cvg_104.4_tip_0_4 | 2    | neutral protease                                                                    | 70 | 2.32E-14 | 68.10%  | 0.112   | IPR013856 (PFAM); IPR013856 (G3DSA:3.10.170.GENE3D); SSF55486 (SUPERFAMILY)                                                                                                                                                                                         |
| 214 | 192413_length_211_cvg_2.0_tip_1_2   | 0    | glyceraldehyde-3-phosphate dehydrogenase c                                          | 70 | 1.94E-25 | 96.40%  | 0.105   | IPR020828 (PFAM); IPR016040 (G3DSA:3.40.50.GENE3D); PTHR10836:SF31 (PANTHER); IPR020831 (PANTHER); SSF51735 (SUPERFAMILY)                                                                                                                                           |
| 215 | 193737_length_212_cvg_2.0_tip_1_1   | 0    | n-acetylated-alpha-linked acidic dipeptidase                                        | 71 | 4.95E-31 | 85.70%  | 0.107   | G3DSA:3.40.630.10 (GENE3D); IPR007484 (PFAM); PTHR10404 (PANTHER); SSF53187 (SUPERFAMILY)                                                                                                                                                                           |
| 216 | 194686_length_213_cvg_2.0_tip_1_5   | 0    | protein partial                                                                     | 71 | 3.11E-16 | 80.90%  | 0.16    | IPR019154 (PFAM); PTHR21357 (PANTHER)                                                                                                                                                                                                                               |
| 217 | 195332_length_213_cvg_2.0_tip_1_4   | 0    | tryptophan-specific transport protein                                               | 71 | 8.96E-40 | 100.00% | 0.14    | IPR018227 (PFAM); PTHR32195 (PANTHER); PTHR32195:SF11 (PANTHER); TRANSMEMBRANE (PHOBIUS); CYTOPLASMIC_DOMAIN (PHOBIUS); NON_CYTOPLASMIC_DOMAIN (PHOBIUS); TMhelix (TMHMM)                                                                                           |
| 218 | 195482_length_213_cvg_2.0_tip_1_4   | 0    | aael008198- partial                                                                 | 71 | 6.22E-17 | 66.30%  | 0.101   | G3DSA:2.170.300.10 (GENE3D); PTHR24035 (PANTHER); IPR013032 (PROSITE_PATTERNS); IPR000742 (PROSITE_PROFILES)                                                                                                                                                        |
| 219 | 195916_length_214_cvg_4.0_tip_1_3   | 0    | dimethylaniline monooxygenase                                                       | 72 | 9.16E-22 | 75.90%  | 0.111   | IPR020946 (PFAM); G3DSA:3.50.50.60 (GENE3D); PTHR23023 (PANTHER); PTHR23023:SF4 (PANTHER); SSF51905 (SUPERFAMILY)                                                                                                                                                   |
| 220 | 196852_length_215_cvg_2.0_tip_1_0   | 0    | phosphoglucose partial                                                              | 72 | 3.26E-45 | 98.80%  | 0.168   | IPR001672 (PFAM); G3DSA:3.40.50.10490 (GENE3D); IPR001672 (PANTHER); PTHR11469:SF7 (PANTHER); IPR001672 (PROSITE_PROFILES); SSF53697 (SUPERFAMILY)                                                                                                                  |
| 221 | 197384_length_215_cvg_2.0_tip_1_1   | 0    | serine threonine-protein phosphatase 4 catalytic subunit                            | 72 | 4.46E-43 | 98.00%  | 0.1     | IPR006186 (PRINTS); IPR029052 (G3DSA:3.60.21.GENE3D); IPR004843 (PFAM); PTHR11668 (PANTHER); IPR029052 (SUPERFAMILY)                                                                                                                                                |
| 222 | 197766_length_216_cvg_87.7_tip_1_1  | 11   | carboxypeptidase b-like                                                             | 72 | 2.81E-21 | 76.10%  | 0.11    | G3DSA:3.40.630.10 (GENE3D); IPR000834 (PFAM); PTHR11705 (PANTHER); IPR000834 (PROSITE_PATTERNS); SSF53187 (SUPERFAMILY)                                                                                                                                             |
| 223 | 198108_length_216_cvg_63.0_tip_1_1  | 11   | carboxypeptidase b-like                                                             | 72 | 2.00E-20 | 77.90%  | 0.128   | IPR000834 (PFAM); G3DSA:3.40.630.10 (GENE3D); PTHR11705 (PANTHER); IPR000834 (PROSITE_PATTERNS); SSF53187 (SUPERFAMILY)                                                                                                                                             |

|     |                                     |      |                                                                      |    |          |        |         |                                                                                                                                                                                                                                                                                                                                         |
|-----|-------------------------------------|------|----------------------------------------------------------------------|----|----------|--------|---------|-----------------------------------------------------------------------------------------------------------------------------------------------------------------------------------------------------------------------------------------------------------------------------------------------------------------------------------------|
| 224 | 200410_length_218_cvg_2.0_tip_1_1   | 0    | isoform g                                                            | 73 | 1.93E-23 | 72.70% | 0.14    | G3DSA:2.10.70.10 (GENE3D); IPR000436 (PFAM); G3DSA:2.10.70.10 (GENE3D); PTHR19325:SF340 (PANTHER); PTHR19325 (PANTHER); IPR000436 (PROSITE_PROFILES); IPR000436 (PROSITE_PROFILES); IPR000436 (SUPERFAMILY); IPR000436 (SUPERFAMILY)                                                                                                    |
| 225 | 200875_length_219_cvg_3.8_tip_1_2   | 0    | upf0669 protein c6orf120 homolog                                     | 73 | 3.07E-12 | 67.70% | 0.809 Y | PTHR31703 (PANTHER); NON_CYTOPLASMIC_DOMAIN (PHOBIUS); SIGNAL_PEPTIDE_H_REGION (PHOBIUS); SIGNAL_PEPTIDE_N_REGION (PHOBIUS); SIGNAL_PEPTIDE_C_REGION (PHOBIUS); SIGNAL_PEPTIDE (PHOBIUS); SignalP-noTM (SIGNALP_EUK); SignalP-noTM (SIGNALP_GRAM_NEGATIVE)                                                                              |
| 226 | 203299_length_221_cvg_3.0_tip_1_3   | 2    | xanthine dehydrogenase                                               | 74 | 3.27E-21 | 79.00% | 0.103   | IPR016169 (G3DSA:3.30.465.GENE3D); IPR002346 (PFAM); PTHR11908:SF32 (PANTHER); PTHR11908 (PANTHER); IPR016166 (SUPERFAMILY)                                                                                                                                                                                                             |
| 227 | 204205_length_222_cvg_2.0_tip_1_3   | 0    | basement membrane-specific heparan sulfate proteoglycan core protein | 74 | 1.25E-26 | 81.80% | 0.109   | IPR002049 (PFAM); G3DSA:2.10.25.10 (GENE3D); PTHR10574 (PANTHER); PTHR10574:SF252 (PANTHER); IPR002049 (PROSITE_PATTERNS); SSF57196 (SUPERFAMILY)                                                                                                                                                                                       |
| 228 | 206453_length_224_cvg_2.0_tip_1_3   | 0    | peptidyl-prolyl cis-trans rhodopsin-specific isozyme-like            | 75 | 1.03E-29 | 78.50% | 0.134   | IPR002130 (PRINTS); IPR002130 (PFAM); IPR029000 (G3DSA:2.40.100.GENE3D); IPR024936 (PANTHER); PTHR11071:SF11 (PANTHER); IPR002130 (PROSITE_PROFILES); IPR029000 (SUPERFAMILY)                                                                                                                                                           |
| 229 | 206984_length_225_cvg_25.7_tip_1_2  | 0    | xanthine dehydrogenase                                               | 75 | 3.94E-07 | 79.00% | 0.226   | IPR012675 (G3DSA:3.10.20.GENE3D)                                                                                                                                                                                                                                                                                                        |
| 230 | 209190_length_227_cvg_2.0_tip_1_5   | 0    | proprotein convertase subtilisin kexin type 7                        | 75 | 4.11E-31 | 85.10% | 0.121   | IPR000209 (PFAM); IPR000209 (G3DSA:3.40.50.GENE3D); PTHR10795:SF9 (PANTHER); IPR015500 (PANTHER); IPR023828 (PROSITE_PATTERNS); IPR000209 (SUPERFAMILY)                                                                                                                                                                                 |
| 231 | 209490_length_227_cvg_2.5_tip_1_2   | 0    | atp-binding component of a transport system                          | 75 | 1.29E-40 | 98.10% | 0.102   | IPR012332 (G3DSA:2.160.20.GENE3D)                                                                                                                                                                                                                                                                                                       |
| 232 | 210110_length_228_cvg_4.4_tip_1_2   | 0    | hypothetical protein Y032_0089g2326                                  | 76 | 5.56E-07 | 62.60% | 0.106   | no IPS match                                                                                                                                                                                                                                                                                                                            |
| 233 | 210620_length_228_cvg_2.0_tip_1_4   | 0    | zinc finger protein 676-like                                         | 76 | 6.78E-24 | 71.40% | 0.119   | IPR015880 (SMART); IPR013087 (G3DSA:3.30.160.GENE3D); IPR013087 (G3DSA:3.30.160.GENE3D); IPR013087 (G3DSA:3.30.160.GENE3D); PF13465 (PFAM); PTHR24409 (PANTHER); IPR007087 (PROSITE_PATTERNS); IPR007087 (PROSITE_PATTERNS); IPR007087 (PROSITE_PROFILES); IPR007087 (PROSITE_PROFILES); SSF57667 (SUPERFAMILY); SSF57667 (SUPERFAMILY) |
| 235 | 211490_length_229_cvg_65.4_tip_1_1  | 115  | chitinase 3                                                          | 76 | 1.20E-17 | 64.90% | 0.111   | IPR001223 (PFAM); IPR013781 (G3DSA:3.20.20.GENE3D); PTHR11177 (PANTHER); IPR017853 (SUPERFAMILY)                                                                                                                                                                                                                                        |
| 236 | 211668_length_229_cvg_54.1_tip_1_5  | 6    | 26kda protease                                                       | 76 | 2.73E-16 | 65.90% | 0.124   | G3DSA:2.40.10.10 (GENE3D); IPR001254 (PFAM); G3DSA:2.40.10.10 (GENE3D); PTHR24268 (PANTHER); IPR001254 (PROSITE_PROFILES); IPR009003 (SUPERFAMILY)                                                                                                                                                                                      |
| 237 | 211962_length_229_cvg_47.2_tip_1_1  | 802  | proclotting enzyme                                                   | 76 | 2.09E-08 | 57.20% | 0.106   | IPR001254 (PFAM); G3DSA:2.40.10.10 (GENE3D); PTHR24268 (PANTHER); IPR009003 (SUPERFAMILY)                                                                                                                                                                                                                                               |
| 238 | 212778_length_230_cvg_2.0_tip_1_2   | 0    | low quality protein: protein flightless-1 homolog                    | 76 | 2.33E-27 | 85.90% | 0.169   | PR00019 (PRINTS); IPR003591 (SMART); G3DSA:3.80.10.10 (GENE3D); IPR001611 (PFAM); IPR007122 (PANTHER); IPR001611 (PROSITE_PROFILES); IPR001611 (PROSITE_PROFILES); IPR001611 (PROSITE_PROFILES); SSF52058 (SUPERFAMILY)                                                                                                                 |
| 234 | 211482_length_229_cvg_59.4_tip_1_3  | 78   | chitinase partial                                                    | 77 | 2.37E-18 | 65.00% | 0.122   | IPR013781 (G3DSA:3.20.20.GENE3D); IPR001223 (PFAM); PTHR11177:SF112 (PANTHER); PTHR11177 (PANTHER); IPR017853 (SUPERFAMILY)                                                                                                                                                                                                             |
| 239 | 213100_length_231_cvg_60.0_tip_1_4  | 81   | chitinase 7 precursor                                                | 77 | 8.32E-08 | 55.80% | 0.135   | IPR013781 (G3DSA:3.20.20.GENE3D); IPR017853 (SUPERFAMILY)                                                                                                                                                                                                                                                                               |
| 240 | 213684_length_231_cvg_2.0_tip_1_5   | 0    | zinc finger protein 665-like isoform x6                              | 77 | 5.69E-21 | 70.60% | 0.108   | IPR015880 (SMART); IPR013087 (G3DSA:3.30.160.GENE3D); PF13465 (PFAM); PTHR24409 (PANTHER); IPR007087 (PROSITE_PATTERNS); IPR007087 (PROSITE_PATTERNS); IPR007087 (PROSITE_PROFILES); IPR007087 (PROSITE_PROFILES); SSF57667 (SUPERFAMILY); SSF57667 (SUPERFAMILY)                                                                       |
| 241 | 214176_length_232_cvg_90.1_tip_0_3  | 426  | low-density lipoprotein receptor-related protein 2-like              | 78 | 3.51E-15 | 63.70% | 0.1     | IPR002172 (PRINTS); IPR002172 (SMART); IPR002172 (PFAM); IPR002172 (G3DSA:4.10.400.GENE3D); G3DSA:4.10.1220.10 (GENE3D); PTHR10529 (PANTHER); IPR023415 (PROSITE_PATTERNS); IPR023415 (PROSITE_PATTERNS); IPR002172 (PROSITE_PROFILES); IPR002172 (PROSITE_PROFILES); IPR002172 (SUPERFAMILY); IPR002172 (SUPERFAMILY)                  |
| 242 | 215360_length_233_cvg_63.0_tip_1_3  | 17   | serine protease 27-like                                              | 78 | 1.20E-10 | 63.70% | 0.104   | IPR001314 (PRINTS); IPR001254 (PFAM); G3DSA:2.40.10.10 (GENE3D); PTHR24258:SF97 (PANTHER); PTHR24258 (PANTHER); IPR018114 (PROSITE_PATTERNS); IPR001254 (PROSITE_PROFILES); IPR009003 (SUPERFAMILY)                                                                                                                                     |
| 243 | 216616_length_234_cvg_4.7_tip_1_1   | 0    | hemagglutinin                                                        | 78 | 3.02E-15 | 68.60% | 0.1     | IPR013856 (G3DSA:3.10.170.GENE3D); IPR013856 (PFAM); SSF55486 (SUPERFAMILY)                                                                                                                                                                                                                                                             |
| 244 | 216696_length_234_cvg_123.1_tip_0_4 | 2107 | low-density lipoprotein receptor-related protein 2-partial           | 78 | 1.88E-14 | 64.40% | 0.098   | IPR002172 (PRINTS); IPR002172 (SMART); IPR002172 (G3DSA:4.10.400.GENE3D); IPR002172 (PFAM); IPR002172 (G3DSA:4.10.400.GENE3D); PTHR10529 (PANTHER); IPR023415 (PROSITE_PATTERNS); IPR002172 (PROSITE_PROFILES); IPR002172 (PROSITE_PROFILES); IPR002172 (SUPERFAMILY); IPR002172 (SUPERFAMILY)                                          |
| 246 | 217726_length_235_cvg_2.0_tip_1_2   | 2    | coactosin-like protein isoform x1                                    | 78 | 7.41E-07 | 68.25% | 0.143   | no IPS match                                                                                                                                                                                                                                                                                                                            |

|     |                                    |     |                                                                      |    |          |         |         |                                                                                                                                                                                                                                                                                                                                                                                                              |
|-----|------------------------------------|-----|----------------------------------------------------------------------|----|----------|---------|---------|--------------------------------------------------------------------------------------------------------------------------------------------------------------------------------------------------------------------------------------------------------------------------------------------------------------------------------------------------------------------------------------------------------------|
| 245 | 217726_length_235_cvg_2.0_tip_1_0  | 2   | neuronal thread protein ad7c-ntp                                     | 79 | 2.06E-19 | 62.80%  | 0.199   | PF13900 (PFAM); PTHR16213 (PANTHER); PTHR16213:SF28 (PANTHER)                                                                                                                                                                                                                                                                                                                                                |
| 247 | 218528_length_236_cvg_4.1_tip_1_0  | 0   | tab y 2 allergen                                                     | 79 | 1.52E-08 | 65.20%  | 0.550 Y | IPR013785 (G3DSA:3.20.20.GENE3D); IPR018155 (PFAM); SIGNAL_PEPTIDE_C_REGION (PHOBIUS); SIGNAL_PEPTIDE_N_REGION (PHOBIUS); NON_CYTOPLASMIC_DOMAIN (PHOBIUS); SIGNAL_PEPTIDE (PHOBIUS); SIGNAL_PEPTIDE_H_REGION (PHOBIUS); SignalP-TM (SIGNALP_EUK); IPR017853 (SUPERFAMILY); TMhelix (TMHMM)                                                                                                                  |
| 248 | 218614_length_236_cvg_3.7_tip_1_3  | 0   | zinc finger protein 358                                              | 79 | 2.10E-17 | 64.40%  | 0.115   | IPR015880 (SMART); IPR013087 (G3DSA:3.30.160.GENE3D); PF13465 (PFAM); IPR013087 (G3DSA:3.30.160.GENE3D); PTHR24409 (PANTHER); IPR007087 (PROSITE_PATTERNS); IPR007087 (PROSITE_PATTERNS); IPR007087 (PROSITE_PROFILES); IPR007087 (PROSITE_PROFILES); IPR007087 (PROSITE_PROFILES); SSF57667 (SUPERFAMILY); SSF57667 (SUPERFAMILY)                                                                           |
| 249 | 218837_length_237_cvg_5.2_tip_1_5  | 0   | tyrosine-protein kinase wsck                                         | 79 | 6.35E-29 | 72.20%  | 0.469 Y | G3DSA:1.10.510.10 (GENE3D); IPR001245 (PFAM); PTHR24416 (PANTHER); IPR000719 (PROSITE_PROFILES); SignalP-noTM (SIGNALP_EUK); IPR011009 (SUPERFAMILY)                                                                                                                                                                                                                                                         |
| 250 | 220301_length_238_cvg_61.5_tip_1_5 | 46  | chitinase 8 precursor                                                | 79 | 7.14E-09 | 61.80%  | 0.108   | IPR001223 (PFAM); IPR013781 (G3DSA:3.20.20.GENE3D); IPR017853 (SUPERFAMILY)                                                                                                                                                                                                                                                                                                                                  |
| 256 | 221489_length_239_cvg_2.0_tip_1_2  | 0   | laminin subunit gamma-1-like                                         | 79 | 6.01E-06 | 69.67%  | 0.237   | IPR002049 (SMART); IPR002049 (PFAM); G3DSA:2.10.25.10 (GENE3D); IPR002049 (PROSITE_PROFILES); SSF57196 (SUPERFAMILY)                                                                                                                                                                                                                                                                                         |
| 251 | 220495_length_238_cvg_2.0_tip_1_3  | 0   | transposase                                                          | 80 | 2.33E-09 | 64.30%  | 0.122   | no IPS match                                                                                                                                                                                                                                                                                                                                                                                                 |
| 252 | 220881_length_239_cvg_63.0_tip_0_3 | 0   | 14-3-3 protein zeta isoform x1                                       | 80 | 7.90E-46 | 95.40%  | 0.111   | IPR000308 (PRINTS); IPR023410 (PFAM); G3DSA:1.20.190.20 (GENE3D); IPR000308 (PANTHER); IPR023410 (SUPERFAMILY)                                                                                                                                                                                                                                                                                               |
| 253 | 220883_length_239_cvg_37.0_tip_0_3 | 0   | 14-3-3 protein zeta isoform x1                                       | 80 | 1.06E-43 | 91.60%  | 0.108   | IPR000308 (PRINTS); IPR023410 (PFAM); G3DSA:1.20.190.20 (GENE3D); IPR000308 (PANTHER); IPR023410 (SUPERFAMILY)                                                                                                                                                                                                                                                                                               |
| 254 | 221143_length_239_cvg_63.0_tip_0_4 | 0   | carboxypeptidase b                                                   | 80 | 5.25E-26 | 69.70%  | 0.108   | IPR000834 (PFAM); G3DSA:3.40.630.10 (GENE3D); PTHR11705 (PANTHER); SSF53187 (SUPERFAMILY)                                                                                                                                                                                                                                                                                                                    |
| 255 | 221301_length_239_cvg_96.7_tip_1_0 | 417 | a chain crystal structure of porcine beta trypsin with % polydocanol | 80 | 1.68E-13 | 67.80%  | 0.104   | G3DSA:2.40.10.10 (GENE3D); G3DSA:2.40.10.10 (GENE3D); IPR001254 (PFAM); PTHR24265 (PANTHER); IPR018114 (PROSITE_PATTERNS); IPR001254 (PROSITE_PROFILES); IPR009003 (SUPERFAMILY)                                                                                                                                                                                                                             |
| 257 | 221619_length_240_cvg_2.0_tip_1_1  | 0   | gastrula zinc finger                                                 | 80 | 1.33E-15 | 62.20%  | 0.114   | IPR015880 (SMART); IPR013087 (G3DSA:3.30.160.GENE3D); PF13465 (PFAM); IPR013087 (G3DSA:3.30.160.GENE3D); PF13912 (PFAM); IPR013087 (G3DSA:3.30.160.GENE3D); PTHR24409 (PANTHER); IPR007087 (PROSITE_PATTERNS); IPR007087 (PROSITE_PATTERNS); IPR007087 (PROSITE_PROFILES); IPR007087 (PROSITE_PROFILES); SSF57667 (SUPERFAMILY); SSF57667 (SUPERFAMILY)                                                      |
| 258 | 221775_length_240_cvg_20.0_tip_0_5 | 0   | partial                                                              | 80 | 6.76E-42 | 93.90%  | 0.1     | IPR006689 (PFAM); IPR027417 (G3DSA:3.40.50.GENE3D); PTHR11711:SF146 (PANTHER); PTHR11711 (PANTHER); IPR024156 (PROSITE_PROFILES); IPR027417 (SUPERFAMILY)                                                                                                                                                                                                                                                    |
| 259 | 222416_length_240_cvg_10.1_tip_1_2 | 0   | odorrnanin-e1 antimicrobial peptide precursor                        | 80 | 9.75E-06 | 61.00%  | 0.164   | no IPS match                                                                                                                                                                                                                                                                                                                                                                                                 |
| 261 | 223378_length_241_cvg_2.0_tip_1_4  | 0   | wd repeat domain isoform cra_c                                       | 80 | 8.19E-09 | 78.63%  | 0.127   | no IPS match                                                                                                                                                                                                                                                                                                                                                                                                 |
| 262 | 223378_length_241_cvg_2.0_tip_1_5  | 0   | low quality protein: lyr motif-containing protein partial            | 80 | 2.93E-12 | 79.60%  | 0.113   | PF13900 (PFAM); PTHR16213 (PANTHER)                                                                                                                                                                                                                                                                                                                                                                          |
| 263 | 223830_length_242_cvg_2.0_tip_1_2  | 0   | lysosomal alpha-mannosidase                                          | 80 | 4.46E-33 | 83.40%  | 0.11    | IPR000602 (PFAM); IPR027291 (G3DSA:3.20.110.GENE3D); PTHR11607 (PANTHER); PTHR11607:SF3 (PANTHER); IPR011330 (SUPERFAMILY)                                                                                                                                                                                                                                                                                   |
| 260 | 223378_length_241_cvg_2.0_tip_1_3  | 0   | hypothetical calcr1-related pioneer protein                          | 81 | 1.49E-09 | 72.00%  | 0.164   | PTHR12138 (PANTHER)                                                                                                                                                                                                                                                                                                                                                                                          |
| 264 | 224158_length_242_cvg_2.0_tip_1_1  | 0   | peptidyl-prolyl cis-trans rhodopsin-specific isozyme                 | 81 | 8.08E-31 | 78.70%  | 0.123   | IPR002130 (PRINTS); IPR002130 (PFAM); IPR029000 (G3DSA:2.40.100.GENE3D); IPR024936 (PANTHER); IPR020892 (PROSITE_PATTERNS); IPR002130 (PROSITE_PROFILES); IPR029000 (SUPERFAMILY)                                                                                                                                                                                                                            |
| 265 | 224530_length_243_cvg_2.0_tip_1_4  | 0   | leukotriene a-4 partial                                              | 81 | 1.33E-35 | 83.50%  | 0.123   | IPR014782 (PFAM); G3DSA:1.10.390.10 (GENE3D); PTHR11533:SF4 (PANTHER); IPR001930 (PANTHER); SSF55486 (SUPERFAMILY)                                                                                                                                                                                                                                                                                           |
| 266 | 229941_length_249_cvg_3.4_tip_1_2  | 0   | balbiani ring protein 3-like                                         | 83 | 4.91E-08 | 57.00%  | 0.101   | IPR001506 (PRINTS); IPR024079 (G3DSA:3.40.390.GENE3D); IPR001506 (PFAM)                                                                                                                                                                                                                                                                                                                                      |
| 267 | 230539_length_250_cvg_2.0_tip_1_2  | 0   | choline partial                                                      | 83 | 3.68E-51 | 100.00% | 0.103   | G3DSA:3.30.560.10 (GENE3D); G3DSA:3.50.50.60 (GENE3D); IPR007867 (PFAM); PTHR11552 (PANTHER); SSF51905 (SUPERFAMILY)                                                                                                                                                                                                                                                                                         |
| 270 | 231865_length_251_cvg_2.0_tip_1_5  | 0   | carbohydrate sulfotransferase 11-like isoform x1                     | 83 | 1.59E-24 | 71.70%  | 0.118   | IPR005331 (PFAM); IPR018011 (PANTHER); PTHR12137:SF29 (PANTHER)                                                                                                                                                                                                                                                                                                                                              |
| 268 | 231227_length_250_cvg_5.5_tip_1_0  | 0   | zinc finger protein 502-like                                         | 84 | 4.09E-15 | 65.30%  | 0.102   | IPR015880 (SMART); IPR007087 (PFAM); PF13894 (PFAM); IPR013087 (G3DSA:3.30.160.GENE3D); IPR013087 (G3DSA:3.30.160.GENE3D); PTHR24409 (PANTHER); PTHR24409:SF14 (PANTHER); IPR007087 (PROSITE_PATTERNS); IPR007087 (PROSITE_PATTERNS); IPR007087 (PROSITE_PATTERNS); IPR007087 (PROSITE_PROFILES); IPR007087 (PROSITE_PROFILES); IPR007087 (PROSITE_PROFILES); SSF57667 (SUPERFAMILY); SSF57667 (SUPERFAMILY) |
| 269 | 231647_length_251_cvg_2.0_tip_1_1  | 2   | 3-hydroxyisobutyrate dehydrogenase                                   | 84 | 5.28E-37 | 90.60%  | 0.121   | IPR029154 (PFAM); IPR016040 (G3DSA:3.40.50.GENE3D); IPR006115 (PFAM); IPR013328 (G3DSA:1.10.1040.GENE3D); PTHR22981 (PANTHER); PTHR22981:SF7 (PANTHER); IPR008927 (SUPERFAMILY); SSF51735 (SUPERFAMILY)                                                                                                                                                                                                      |
| 271 | 233341_length_253_cvg_2.0_tip_1_1  | 0   | adp-ribosylation factor 6                                            | 84 | 8.06E-30 | 98.90%  | 0.153   | IPR006689 (PFAM); IPR027417 (G3DSA:3.40.50.GENE3D); PTHR11711:SF151 (PANTHER); PTHR11711 (PANTHER); IPR027417 (SUPERFAMILY)                                                                                                                                                                                                                                                                                  |



|     |                                    |      |                                                                          |    |          |        |         |                                                                                                                                                                                                                                                                                                                              |
|-----|------------------------------------|------|--------------------------------------------------------------------------|----|----------|--------|---------|------------------------------------------------------------------------------------------------------------------------------------------------------------------------------------------------------------------------------------------------------------------------------------------------------------------------------|
| 272 | 234371_length_254_cvg_40.0_tip_1_0 | 0    | adp-ribosylation factor                                                  | 85 | 2.43E-09 | 88.90% | 0.218   | IPR006689 (PFAM); IPR027417 (G3DSA:3.40.50.GENE3D); PTHR11711 (PANTHER); PTHR11711:SF142 (PANTHER); IPR027417 (SUPERFAMILY)                                                                                                                                                                                                  |
| 273 | 234561_length_254_cvg_2.0_tip_1_3  | 0    | tat (twin-arginine translocation) pathway signal sequence domain protein | 85 | 6.66E-55 | 99.80% | 0.101   | IPR006963 (PFAM); G3DSA:3.40.50.740 (GENE3D); IPR006656 (PFAM); G3DSA:2.20.25.90 (GENE3D); PTHR11615 (PANTHER); PTHR11615:SF37 (PANTHER); IPR006963 (PROSITE_PROFILES); SSF53706 (SUPERFAMILY)                                                                                                                               |
| 274 | 235091_length_255_cvg_12.0_tip_1_1 | 0    | 14-3-3 partial                                                           | 85 | 3.61E-48 | 94.10% | 0.106   | IPR000308 (PRINTS); IPR023410 (SMART); G3DSA:1.20.190.20 (GENE3D); IPR023410 (PFAM); IPR000308 (PANTHER); IPR023410 (SUPERFAMILY)                                                                                                                                                                                            |
| 275 | 235243_length_255_cvg_4.8_tip_1_5  | 0    | nidogen- partial                                                         | 85 | 3.23E-09 | 61.30% | 0.157   | IPR000716 (SMART); IPR000716 (G3DSA:4.10.800.GENE3D); IPR000716 (PFAM); IPR000716 (PROSITE_PATTERNS); IPR000716 (PROSITE_PROFILES); IPR000716 (SUPERFAMILY)                                                                                                                                                                  |
| 276 | 236013_length_256_cvg_2.0_tip_1_1  | 2    | von willebrand factor a domain-containing protein 8                      | 85 | 6.56E-13 | 99.20% | 0.194   | PTHR21610 (PANTHER); PTHR21610:SF9 (PANTHER); CYTOPLASMIC_DOMAIN (PHOBIUS); NON_CYTOPLASMIC_DOMAIN (PHOBIUS); TRANSMEMBRANE (PHOBIUS); TMhelix (TMHMM)                                                                                                                                                                       |
| 277 | 236653_length_257_cvg_2.0_tip_1_2  | 0    | laminin subunit beta-1                                                   | 85 | 6.24E-11 | 74.50% | 0.1     | IPR013015 (PROSITE_PROFILES)                                                                                                                                                                                                                                                                                                 |
| 278 | 237293_length_257_cvg_2.6_tip_1_3  | 0    | inactive dipeptidyl                                                      | 86 | 9.64E-27 | 80.50% | 0.125   | IPR029058 (G3DSA:3.40.50.GENE3D); IPR001375 (PFAM); PTHR11731:SF103 (PANTHER); PTHR11731 (PANTHER); IPR029058 (SUPERFAMILY)                                                                                                                                                                                                  |
| 279 | 237309_length_257_cvg_2.0_tip_1_4  | 0    | cathepsin o-like                                                         | 86 | 4.93E-33 | 83.60% | 0.116   | G3DSA:3.90.70.10 (GENE3D); IPR000668 (PFAM); PTHR12411:SF287 (PANTHER); IPR013128 (PANTHER); IPR025660 (PROSITE_PATTERNS); SSF54001 (SUPERFAMILY)                                                                                                                                                                            |
| 280 | 238113_length_258_cvg_2.0_tip_1_1  | 0    | nidogen-2 isoform x1                                                     | 86 | 8.02E-34 | 82.70% | 0.102   | IPR000033 (SMART); IPR011042 (G3DSA:2.120.10.GENE3D); IPR000033 (PFAM); PTHR10529 (PANTHER); IPR000033 (PROSITE_PROFILES); IPR000033 (PROSITE_PROFILES); IPR000033 (PROSITE_PROFILES); SSF63825 (SUPERFAMILY)                                                                                                                |
| 281 | 239445_length_260_cvg_63.0_tip_1_3 | 827  | trypsin-1-like isoform x1                                                | 87 | 2.12E-16 | 66.10% | 0.157   | G3DSA:2.40.10.10 (GENE3D); IPR001254 (PFAM); PTHR24255 (PANTHER); IPR018114 (PROSITE_PATTERNS); IPR001254 (PROSITE_PROFILES); IPR009003 (SUPERFAMILY)                                                                                                                                                                        |
| 282 | 239589_length_260_cvg_16.0_tip_1_0 | 4    | venom protease-like                                                      | 87 | 1.19E-06 | 60.00% | 0.630 Y | IPR001254 (PFAM); G3DSA:2.40.10.10 (GENE3D); SignalP-noTM (SIGNALP_EUK); IPR009003 (SUPERFAMILY)                                                                                                                                                                                                                             |
| 283 | 240267_length_261_cvg_98.3_tip_0_5 | 1760 | basement membrane-specific heparan sulfate proteoglycan core protein     | 87 | 5.78E-18 | 64.00% | 0.103   | IPR002172 (PRINTS); IPR002172 (SMART); IPR002172 (PFAM); IPR002172 (G3DSA:4.10.400.GENE3D); IPR002172 (G3DSA:4.10.400.GENE3D); PTHR10529 (PANTHER); IPR023415 (PROSITE_PATTERNS); IPR023415 (PROSITE_PATTERNS); IPR002172 (PROSITE_PROFILES); IPR002172 (PROSITE_PROFILES); IPR002172 (SUPERFAMILY); IPR002172 (SUPERFAMILY) |
| 284 | 242763_length_264_cvg_4.0_tip_1_4  | 4    | attractin-like protein 1                                                 | 88 | 4.02E-23 | 70.70% | 0.105   | PF13854 (PFAM); IPR015915 (G3DSA:2.120.10.GENE3D); IPR002165 (PFAM); PTHR10574:SF223 (PANTHER); PTHR10574 (PANTHER); SSF117281 (SUPERFAMILY)                                                                                                                                                                                 |
| 285 | 242967_length_264_cvg_5.9_tip_1_5  | 0    | -like protein 3                                                          | 88 | 4.10E-20 | 74.10% | 0.114   | G3DSA:3.30.70.1500 (GENE3D); IPR002634 (PFAM); PTHR12735 (PANTHER); PTHR12735:SF4 (PANTHER); IPR002634 (SUPERFAMILY)                                                                                                                                                                                                         |
| 286 | 243335_length_265_cvg_3.4_tip_1_4  | 0    | hypothetical protein, partial                                            | 88 | 4.45E-06 | 50.00% | 0.390 Y | SIGNAL_PEPTIDE_C_REGION (PHOBIUS); SIGNAL_PEPTIDE_H_REGION (PHOBIUS); SIGNAL_PEPTIDE (PHOBIUS); NON_CYTOPLASMIC_DOMAIN (PHOBIUS); SIGNAL_PEPTIDE_N_REGION (PHOBIUS); SignalP-TM (SIGNALP_GRAM_POSITIVE)                                                                                                                      |
| 287 | 243351_length_265_cvg_2.0_tip_1_2  | 0    | dnaj homolog subfamily c member 18                                       | 88 | 3.16E-31 | 87.30% | 0.102   | IPR001623 (PRINTS); IPR001623 (SMART); IPR001623 (G3DSA:1.10.287.GENE3D); IPR001623 (PFAM); PTHR24078:SF15 (PANTHER); PTHR24078 (PANTHER); IPR001623 (PROSITE_PROFILES); IPR001623 (SUPERFAMILY)                                                                                                                             |
| 288 | 243423_length_265_cvg_81.6_tip_0_5 | 7    | carboxypeptidase b-like                                                  | 88 | 6.35E-29 | 75.60% | 0.122   | IPR000834 (PFAM); G3DSA:3.40.630.10 (GENE3D); PTHR11705 (PANTHER); SSF53187 (SUPERFAMILY)                                                                                                                                                                                                                                    |
| 289 | 244475_length_266_cvg_2.0_tip_1_0  | 0    | hemagglutinin                                                            | 89 | 1.13E-09 | 55.20% | 0.134   | G3DSA:1.10.390.10 (GENE3D)                                                                                                                                                                                                                                                                                                   |
| 290 | 244758_length_266_cvg_2.0_tip_1_4  | 0    | serine protease                                                          | 89 | 1.49E-07 | 56.10% | 0.098   | G3DSA:2.40.10.10 (GENE3D); IPR001254 (PFAM); IPR009003 (SUPERFAMILY)                                                                                                                                                                                                                                                         |
| 291 | 246412_length_268_cvg_3.0_tip_1_4  | 0    | 6-phospho-beta- partial                                                  | 89 | 2.41E-57 | 97.80% | 0.148   | IPR001360 (PFAM); IPR013781 (G3DSA:3.20.20.GENE3D); IPR001360 (PANTHER); PTHR10353:SF35 (PANTHER); IPR017853 (SUPERFAMILY)                                                                                                                                                                                                   |
| 292 | 246604_length_269_cvg_4.0_tip_0_2  | 0    | upf0364 protein c6orf211 homolog                                         | 89 | 9.87E-21 | 70.50% | 0.123   | IPR002791 (PFAM); PTHR12260:SF1 (PANTHER); PTHR12260 (PANTHER); IPR002791 (SUPERFAMILY)                                                                                                                                                                                                                                      |
| 293 | 246606_length_269_cvg_8.5_tip_0_2  | 0    | upf0364 protein c6orf211 homolog                                         | 89 | 3.03E-19 | 68.70% | 0.141   | IPR002791 (PFAM); PTHR12260 (PANTHER); PTHR12260:SF1 (PANTHER); IPR002791 (SUPERFAMILY)                                                                                                                                                                                                                                      |
| 294 | 247188_length_269_cvg_2.0_tip_1_1  | 0    | down syndrome cell adhesion molecule-like protein dscam2                 | 90 | 2.01E-22 | 71.00% | 0.135   | IPR013783 (G3DSA:2.60.40.GENE3D); IPR003961 (PFAM); PTHR10489 (PANTHER); PTHR10489:SF567 (PANTHER); IPR003961 (PROSITE_PROFILES); IPR003961 (SUPERFAMILY)                                                                                                                                                                    |
| 295 | 247890_length_270_cvg_2.0_tip_1_5  | 0    | tryptophan partial                                                       | 90 | 3.39E-53 | 99.80% | 0.148   | IPR018227 (PFAM); PTHR32195 (PANTHER); PTHR32195:SF11 (PANTHER); NON_CYTOPLASMIC_DOMAIN (PHOBIUS); CYTOPLASMIC_DOMAIN (PHOBIUS); NON_CYTOPLASMIC_DOMAIN (PHOBIUS); TRANSMEMBRANE (PHOBIUS); TRANSMEMBRANE (PHOBIUS); CYTOPLASMIC_DOMAIN (PHOBIUS); TRANSMEMBRANE (PHOBIUS); TMhelix (TMHMM); TMhelix (TMHMM)                 |

|     |                                    |    |                                                           |    |          |         |       |                                                                                                                                                                                                                                                                                                                                                                                       |
|-----|------------------------------------|----|-----------------------------------------------------------|----|----------|---------|-------|---------------------------------------------------------------------------------------------------------------------------------------------------------------------------------------------------------------------------------------------------------------------------------------------------------------------------------------------------------------------------------------|
| 298 | 249596_length_272_cvg_2.0_tip_1_2  | 0  | gamma-aminobutyraldehyde dehydrogenase                    | 90 | 1.10E-56 | 98.20%  | 0.102 | IPR016163 (G3DSA:3.40.309.GENE3D); IPR015590 (PFAM); PTHR11699:SF109 (PANTHER); PTHR11699 (PANTHER); IPR016161 (SUPERFAMILY)                                                                                                                                                                                                                                                          |
| 296 | 248344_length_271_cvg_4.9_tip_1_0  | 0  | family partial                                            | 91 | 6.30E-57 | 100.00% | 0.121 | IPR006664 (PRINTS); IPR006665 (PFAM); IPR006665 (G3DSA:3.30.1330.GENE3D); PTHR30128:SF0 (PANTHER); PTHR30128 (PANTHER); IPR006690 (PROSITE_PATTERNS); IPR006665 (PROSITE_PROFILES); IPR006665 (SUPERFAMILY)                                                                                                                                                                           |
| 297 | 249594_length_272_cvg_16.9_tip_0_0 | 0  | zinc finger protein 235-like                              | 91 | 1.59E-12 | 56.90%  | 0.12  | IPR015880 (SMART); IPR013087 (G3DSA:3.30.160.GENE3D); IPR007087 (PFAM); IPR013087 (G3DSA:3.30.160.GENE3D); PF13894 (PFAM); PTHR24409 (PANTHER); PTHR24409:SF14 (PANTHER); IPR007087 (PROSITE_PATTERNS); IPR007087 (PROSITE_PROFILES); IPR007087 (PROSITE_PROFILES); SSF57667 (SUPERFAMILY); SSF57667 (SUPERFAMILY)                                                                    |
| 299 | 250054_length_273_cvg_93.9_tip_0_0 | 2  | annexin partial                                           | 91 | 1.50E-28 | 76.80%  | 0.11  | Coil (COILS); IPR001464 (PRINTS); IPR018502 (SMART); IPR018502 (PFAM); IPR018502 (G3DSA:1.10.220.GENE3D); PTHR10502 (PANTHER); IPR018252 (PROSITE_PATTERNS); SSF47874 (SUPERFAMILY)                                                                                                                                                                                                   |
| 300 | 250320_length_273_cvg_84.9_tip_0_3 | 14 | annexin partial                                           | 91 | 6.08E-29 | 78.60%  | 0.103 | IPR001464 (PRINTS); IPR018502 (SMART); IPR018502 (G3DSA:1.10.220.GENE3D); IPR018502 (PFAM); PTHR10502 (PANTHER); IPR018252 (PROSITE_PATTERNS); SSF47874 (SUPERFAMILY)                                                                                                                                                                                                                 |
| 301 | 250426_length_273_cvg_53.0_tip_1_0 | 0  | isoform cra_b                                             | 91 | 1.38E-56 | 100.00% | 0.128 | IPR019956 (PRINTS); IPR000626 (SMART); G3DSA:3.10.20.90 (GENE3D); IPR000626 (PFAM); G3DSA:3.10.20.90 (GENE3D); PTHR10666 (PANTHER); IPR019954 (PROSITE_PATTERNS); IPR000626 (PROSITE_PROFILES); IPR029071 (SUPERFAMILY)                                                                                                                                                               |
| 302 | 251628_length_275_cvg_57.7_tip_1_2 | 15 | low-density lipoprotein receptor-related protein 2        | 91 | 2.30E-14 | 64.50%  | 0.131 | IPR002172 (PRINTS); IPR002172 (SMART); IPR002172 (G3DSA:4.10.400.GENE3D); IPR002172 (PFAM); IPR002172 (G3DSA:4.10.400.GENE3D); PTHR10529 (PANTHER); IPR023415 (PROSITE_PATTERNS); IPR002172 (PROSITE_PROFILES); IPR002172 (PROSITE_PROFILES); IPR002172 (SUPERFAMILY); IPR002172 (SUPERFAMILY)                                                                                        |
| 303 | 251756_length_275_cvg_60.0_tip_1_0 | 74 | chitinase partial                                         | 92 | 1.24E-21 | 65.00%  | 0.104 | IPR013781 (G3DSA:3.20.20.GENE3D); IPR001223 (PFAM); PTHR11177 (PANTHER); PTHR11177:SF45 (PANTHER); IPR001579 (PROSITE_PATTERNS); IPR017853 (SUPERFAMILY)                                                                                                                                                                                                                              |
| 304 | 252826_length_277_cvg_50.0_tip_1_2 | 0  | adp-ribosylation factor 2                                 | 92 | 2.27E-13 | 100.00% | 0.111 | IPR006689 (PFAM); IPR027417 (G3DSA:3.40.50.GENE3D); PTHR11711 (PANTHER); PTHR11711:SF145 (PANTHER); CYTOPLASMIC_DOMAIN (PHOBIUS); TRANSMEMBRANE (PHOBIUS); NON_CYTOPLASMIC_DOMAIN (PHOBIUS); IPR027417 (SUPERFAMILY); TMhelix (TMHMM)                                                                                                                                                 |
| 305 | 254410_length_279_cvg_2.0_tip_1_2  | 0  | plexin- partial                                           | 93 | 7.17E-41 | 84.80%  | 0.107 | IPR001627 (PFAM); IPR015943 (G3DSA:2.130.10.GENE3D); PTHR22625 (PANTHER); PTHR22625:SF16 (PANTHER); IPR001627 (PROSITE_PROFILES); IPR001627 (SUPERFAMILY)                                                                                                                                                                                                                             |
| 308 | 255670_length_280_cvg_2.8_tip_1_1  | 0  | serine endoprotease partial                               | 93 | 1.77E-57 | 100.00% | 0.105 | IPR001940 (PRINTS); PF13365 (PFAM); G3DSA:2.40.10.10 (GENE3D); PTHR22939 (PANTHER); PTHR22939:SF79 (PANTHER); IPR009003 (SUPERFAMILY)                                                                                                                                                                                                                                                 |
| 306 | 255344_length_280_cvg_3.0_tip_1_0  | 2  | ankyrin repeat-containing protein                         | 94 | 2.55E-12 | 59.40%  | 0.119 | IPR002110 (PRINTS); IPR002110 (SMART); IPR020683 (PFAM); IPR020683 (G3DSA:1.25.40.GENE3D); PTHR24198 (PANTHER); IPR002110 (PROSITE_PROFILES); IPR020683 (PROSITE_PROFILES); IPR002110 (PROSITE_PROFILES); IPR020683 (SUPERFAMILY)                                                                                                                                                     |
| 307 | 255456_length_280_cvg_2.0_tip_1_0  | 0  | hemocyte protein-glutamine gamma-glutamyltransferase-like | 94 | 3.58E-35 | 79.70%  | 0.104 | IPR013783 (G3DSA:2.60.40.GENE3D); IPR002931 (G3DSA:3.90.260.GENE3D); IPR023608 (PANTHER); PTHR11590:SF40 (PANTHER); SSF54001 (SUPERFAMILY)                                                                                                                                                                                                                                            |
| 309 | 257696_length_283_cvg_8.6_tip_1_2  | 0  | laccase 1                                                 | 94 | 3.20E-34 | 76.00%  | 0.121 | IPR008972 (G3DSA:2.60.40.GENE3D); IPR011707 (PFAM); PTHR11709 (PANTHER); PTHR11709:SF33 (PANTHER); IPR008972 (SUPERFAMILY)                                                                                                                                                                                                                                                            |
| 311 | 260749_length_287_cvg_2.0_tip_1_2  | 2  | ---NA---                                                  | 95 |          |         | 0.151 | IPR002172 (SMART); IPR002172 (PFAM); IPR002172 (G3DSA:4.10.400.GENE3D); IPR023415 (PROSITE_PATTERNS); IPR002172 (PROSITE_PROFILES); IPR002172 (SUPERFAMILY)                                                                                                                                                                                                                           |
| 310 | 259772_length_286_cvg_2.0_tip_1_3  | 1  | tyrosine-protein kinase-like 7                            | 96 | 7.99E-25 | 71.70%  | 0.102 | IPR003599 (SMART); IPR003598 (SMART); IPR013783 (G3DSA:2.60.40.GENE3D); IPR013098 (PFAM); IPR007110 (PROSITE_PROFILES); SSF48726 (SUPERFAMILY)                                                                                                                                                                                                                                        |
| 312 | 261405_length_288_cvg_2.0_tip_1_0  | 2  | zinc c2h2 type domain-containing protein                  | 96 | 3.05E-19 | 60.30%  | 0.102 | IPR015880 (SMART); PF13465 (PFAM); PF13894 (PFAM); IPR013087 (G3DSA:3.30.160.GENE3D); IPR013087 (G3DSA:3.30.160.GENE3D); IPR013087 (G3DSA:3.30.160.GENE3D); PTHR24409 (PANTHER); IPR007087 (PROSITE_PATTERNS); IPR007087 (PROSITE_PATTERNS); IPR007087 (PROSITE_PATTERNS); IPR007087 (PROSITE_PROFILES); IPR007087 (PROSITE_PROFILES); SSF57667 (SUPERFAMILY); SSF57667 (SUPERFAMILY) |
| 313 | 261963_length_289_cvg_2.0_tip_1_5  | 0  | n-acetylmuramoyl-l-alanine partial                        | 96 | 5.98E-62 | 100.00% | 0.117 | IPR002508 (SMART); IPR002508 (PFAM); IPR002508 (G3DSA:3.40.630.GENE3D); PTHR30404:SF0 (PANTHER); PTHR30404 (PANTHER); SSF53187 (SUPERFAMILY)                                                                                                                                                                                                                                          |

|     |                                    |     |                                                                 |     |          |         |         |                                                                                                                                                                                                                                                                                                                                                                                                                                    |
|-----|------------------------------------|-----|-----------------------------------------------------------------|-----|----------|---------|---------|------------------------------------------------------------------------------------------------------------------------------------------------------------------------------------------------------------------------------------------------------------------------------------------------------------------------------------------------------------------------------------------------------------------------------------|
| 314 | 262447_length_290_cvg_3.9_tip_1_3  | 2   | zinc finger protein ozf-like                                    | 97  | 1.48E-24 | 64.50%  | 0.192   | IPR015880 (SMART); IPR013087 (G3DSA:3.30.160.GENE3D); PF13465 (PFAM); IPR013087 (G3DSA:3.30.160.GENE3D); PTHR24409 (PANTHER); IPR007087 (PROSITE_PATTERNS); IPR007087 (PROSITE_PATTERNS); IPR007087 (PROSITE_PROFILES); IPR007087 (PROSITE_PROFILES); IPR007087 (PROSITE_PROFILES); SSF57667 (SUPERFAMILY); SSF57667 (SUPERFAMILY)                                                                                                 |
| 315 | 263625_length_291_cvg_3.0_tip_1_1  | 1   | zinc finger protein                                             | 97  | 6.20E-18 | 63.00%  | 0.111   | IPR015880 (SMART); IPR013087 (G3DSA:3.30.160.GENE3D); IPR013087 (G3DSA:3.30.160.GENE3D); PF13909 (PFAM); PF13465 (PFAM); PTHR24409:SF14 (PANTHER); PTHR24409 (PANTHER); IPR007087 (PROSITE_PATTERNS); IPR007087 (PROSITE_PATTERNS); IPR007087 (PROSITE_PATTERNS); IPR007087 (PROSITE_PROFILES); IPR007087 (PROSITE_PROFILES); IPR007087 (PROSITE_PROFILES); SSF57667 (SUPERFAMILY); SSF57667 (SUPERFAMILY)                         |
| 316 | 263999_length_292_cvg_2.0_tip_1_1  | 1   | polypeptide n-acetylgalactosaminyltransferase 9-like isoform x1 | 97  | 6.58E-41 | 91.40%  | 0.121   | PTHR11675 (PANTHER)                                                                                                                                                                                                                                                                                                                                                                                                                |
| 317 | 265441_length_294_cvg_70.6_tip_1_4 | 92  | serine (or cysteine) proteinase clade b member                  | 98  | 5.69E-13 | 70.60%  | 0.113   | G3DSA:2.30.39.10 (GENE3D); IPR023796 (PFAM); IPR000215 (PANTHER); PTHR11461:SF52 (PANTHER); IPR023795 (PROSITE_PATTERNS); IPR023796 (SUPERFAMILY)                                                                                                                                                                                                                                                                                  |
| 318 | 265955_length_294_cvg_5.5_tip_1_2  | 0   | zinc finger protein draculin                                    | 98  | 1.20E-12 | 57.00%  | 0.103   | IPR015880 (SMART); IPR007087 (PFAM); PF13894 (PFAM); IPR013087 (G3DSA:3.30.160.GENE3D); IPR013087 (G3DSA:3.30.160.GENE3D); PTHR24409 (PANTHER); PTHR24409:SF14 (PANTHER); IPR007087 (PROSITE_PATTERNS); IPR007087 (PROSITE_PATTERNS); IPR007087 (PROSITE_PROFILES); IPR007087 (PROSITE_PROFILES); SSF57667 (SUPERFAMILY); SSF57667 (SUPERFAMILY)                                                                                   |
| 319 | 266815_length_295_cvg_4.0_tip_1_2  | 1   | gamma-glutamyl hydrolase                                        | 98  | 6.47E-29 | 71.80%  | 0.113   | IPR011697 (PFAM); IPR029062 (G3DSA:3.40.50.GENE3D); IPR015527 (PANTHER); IPR015527 (PROSITE_PROFILES); IPR029062 (SUPERFAMILY)                                                                                                                                                                                                                                                                                                     |
| 320 | 267525_length_296_cvg_2.2_tip_1_4  | 1   | n-acetylmuramoyl-l-alanine amidase family partial               | 99  | 1.17E-51 | 100.00% | 0.101   | IPR002508 (SMART); IPR002508 (PFAM); IPR002508 (G3DSA:3.40.630.GENE3D); PTHR30404 (PANTHER); PTHR30404:SF0 (PANTHER); SSF53187 (SUPERFAMILY)                                                                                                                                                                                                                                                                                       |
| 321 | 267961_length_297_cvg_2.0_tip_1_5  | 0   | bifunctional chitinase lysozyme domain protein                  | 99  | 4.63E-54 | 99.80%  | 0.107   | CYTOPLASMIC_DOMAIN (PHOBIUS); NON_CYTOPLASMIC_DOMAIN (PHOBIUS); TRANSMEMBRANE (PHOBIUS); TMhelix (TMHMM)                                                                                                                                                                                                                                                                                                                           |
| 322 | 268179_length_297_cvg_2.0_tip_1_5  | 1   | agrin-like isoform x2                                           | 99  | 9.40E-20 | 59.40%  | 0.121   | G3DSA:2.40.50.120 (GENE3D); IPR004850 (PFAM); IPR004850 (PROSITE_PROFILES); IPR008993 (SUPERFAMILY)                                                                                                                                                                                                                                                                                                                                |
| 323 | 269203_length_299_cvg_3.0_tip_1_5  | 2   | formate dehydrogenase h                                         | 99  | 8.09E-67 | 100.00% | 0.102   | G3DSA:2.20.25.90 (GENE3D); G3DSA:3.40.50.740 (GENE3D); IPR006656 (PFAM); PTHR11615:SF112 (PANTHER); PTHR11615 (PANTHER); IPR006963 (PROSITE_PROFILES); SSF53706 (SUPERFAMILY)                                                                                                                                                                                                                                                      |
| 324 | 270615_length_300_cvg_4.0_tip_1_1  | 2   | beta- -n-acetylgalactosaminyltransferase bre-4                  | 100 | 1.02E-26 | 87.00%  | 0.105   | IPR027791 (PFAM); IPR029044 (G3DSA:3.90.550.GENE3D); IPR003859 (PANTHER); PTHR19300:SF30 (PANTHER); IPR029044 (SUPERFAMILY)                                                                                                                                                                                                                                                                                                        |
| 325 | 270965_length_300_cvg_3.0_tip_1_3  | 2   | protein sda1 homolog                                            | 100 | 4.89E-49 | 88.60%  | 0.121   | IPR007949 (PFAM); PTHR12730 (PANTHER); IPR027312 (PTHR12730:PANTHER)                                                                                                                                                                                                                                                                                                                                                               |
| 326 | 271585_length_300_cvg_3.3_tip_1_1  | 3   | ---NA---                                                        | 100 |          |         | 0.151   | TRANSMEMBRANE (PHOBIUS); NON_CYTOPLASMIC_DOMAIN (PHOBIUS); CYTOPLASMIC_DOMAIN (PHOBIUS); TMhelix (TMHMM)                                                                                                                                                                                                                                                                                                                           |
| 327 | 273919_length_302_cvg_86.2_tip_0_3 | 586 | venom allergen 3-like                                           | 101 | 8.31E-12 | 51.40%  | 0.119   | IPR014044 (PFAM); IPR014044 (G3DSA:3.40.33.GENE3D); IPR001283 (PANTHER); IPR014044 (SUPERFAMILY)                                                                                                                                                                                                                                                                                                                                   |
| 328 | 274859_length_303_cvg_2.8_tip_1_1  | 2   | histidine-rich glyco                                            | 101 | 1.33E-20 | 53.90%  | 0.113   | no IPS match                                                                                                                                                                                                                                                                                                                                                                                                                       |
| 329 | 275207_length_304_cvg_2.0_tip_1_2  | 1   | serine protease 47 isoform x3                                   | 101 | 1.21E-13 | 56.10%  | 0.101   | G3DSA:2.40.10.10 (GENE3D); G3DSA:2.40.10.10 (GENE3D); IPR001254 (PFAM); PTHR24275 (PANTHER); PTHR24275:SF50 (PANTHER); IPR001254 (PROSITE_PROFILES); IPR009003 (SUPERFAMILY)                                                                                                                                                                                                                                                       |
| 330 | 275259_length_304_cvg_3.0_tip_1_5  | 1   | glycerophosphoryl diester phosphodiesterase domain protein      | 101 | 3.41E-64 | 100.00% | 0.566 Y | IPR030395 (PFAM); IPR017946 (G3DSA:3.20.20.GENE3D); PTHR23344:SF7 (PANTHER); IPR004129 (PANTHER); SIGNAL_PEPTIDE_C_REGION (PHOBIUS); SIGNAL_PEPTIDE (PHOBIUS); SIGNAL_PEPTIDE_N_REGION (PHOBIUS); SIGNAL_PEPTIDE_H_REGION (PHOBIUS); NON_CYTOPLASMIC_DOMAIN (PHOBIUS); IPR030395 (PROSITE_PROFILES); SignalP-TM (SIGNALP_GRAM_POSITIVE); SignalP-noTM (SIGNALP_EUK); SignalP-noTM (SIGNALP_GRAM_NEGATIVE); IPR017946 (SUPERFAMILY) |
| 331 | 275481_length_305_cvg_2.0_tip_1_3  | 0   | trna binding domain protein                                     | 102 | 1.31E-66 | 100.00% | 0.096   | IPR012340 (G3DSA:2.40.50.GENE3D); IPR002547 (PFAM); PTHR11586 (PANTHER); IPR002547 (PROSITE_PROFILES); IPR012340 (SUPERFAMILY)                                                                                                                                                                                                                                                                                                     |
| 332 | 275747_length_305_cvg_2.0_tip_1_0  | 0   | hypothetical protein ZHAS_00020562                              | 102 | 1.99E-26 | 67.50%  | 0.123   | IPR016090 (G3DSA:1.20.90.GENE3D); IPR001211 (PFAM); PTHR12253 (PANTHER); IPR016090 (SUPERFAMILY)                                                                                                                                                                                                                                                                                                                                   |
| 333 | 275883_length_306_cvg_7.6_tip_0_1  | 1   | bola-like protein 3                                             | 102 | 5.80E-12 | 90.70%  | 0.099   | IPR002634 (PFAM); G3DSA:3.30.70.1500 (GENE3D); PTHR12735:SF4 (PANTHER); PTHR12735 (PANTHER); IPR002634 (SUPERFAMILY)                                                                                                                                                                                                                                                                                                               |

|     |                                    |       |                                                             |     |          |         |         |                                                                                                                                                                                                                                                                                                                                                                                                                                                                                           |
|-----|------------------------------------|-------|-------------------------------------------------------------|-----|----------|---------|---------|-------------------------------------------------------------------------------------------------------------------------------------------------------------------------------------------------------------------------------------------------------------------------------------------------------------------------------------------------------------------------------------------------------------------------------------------------------------------------------------------|
| 334 | 276413_length_307_cvg_7.9_tip_1_0  | 2     | zinc finger partial                                         | 103 | 6.79E-21 | 60.00%  | 0.137   | IPR015880 (SMART); IPR013087 (G3DSA:3.30.160.GENE3D); PF13465 (PFAM); IPR013087 (G3DSA:3.30.160.GENE3D); IPR013087 (G3DSA:3.30.160.GENE3D); PTHR24409:SF14 (PANTHER); PTHR24409 (PANTHER); IPR007087 (PROSITE_PATTERNS); IPR007087 (PROSITE_PATTERNS); IPR007087 (PROSITE_PROFILES); IPR007087 (PROSITE_PROFILES); IPR007087 (PROSITE_PROFILES); SSF57667 (SUPERFAMILY); SSF57667 (SUPERFAMILY)                                                                                           |
| 335 | 281827_length_318_cvg_44.5_tip_1_3 | 6     | sjhgc07951 protein                                          | 106 | 6.57E-06 | 55.50%  | 0.222   | IPR002172 (SMART); IPR002172 (PFAM); IPR002172 (G3DSA:4.10.400.GENE3D); NON_CYTOPLASMIC_DOMAIN (PHOBIUS); CYTOPLASMIC_DOMAIN (PHOBIUS); TRANSMEMBRANE (PHOBIUS); IPR002172 (PROSITE_PROFILES); IPR002172 (SUPERFAMILY)                                                                                                                                                                                                                                                                    |
| 336 | 282343_length_319_cvg_3.9_tip_1_0  | 3     | retinol dehydrogenase 13                                    | 107 | 8.96E-27 | 75.80%  | 0.134   | IPR002198 (PFAM); IPR016040 (G3DSA:3.40.50.GENE3D); PTHR24320 (PANTHER); TRANSMEMBRANE (PHOBIUS); NON_CYTOPLASMIC_DOMAIN (PHOBIUS); CYTOPLASMIC_DOMAIN (PHOBIUS); SSF51735 (SUPERFAMILY); TMhelix (TMHMM)                                                                                                                                                                                                                                                                                 |
| 337 | 283149_length_320_cvg_3.0_tip_1_4  | 2     | zinc finger and scan domain-containing protein 2            | 107 | 2.65E-15 | 52.60%  | 0.1     | IPR015880 (SMART); PF13465 (PFAM); IPR007087 (PFAM); IPR013087 (G3DSA:3.30.160.GENE3D); IPR013087 (G3DSA:3.30.160.GENE3D); IPR013087 (G3DSA:3.30.160.GENE3D); PTHR24409 (PANTHER); PTHR24409:SF13 (PANTHER); IPR007087 (PROSITE_PATTERNS); IPR007087 (PROSITE_PROFILES); IPR007087 (PROSITE_PROFILES); IPR007087 (PROSITE_PROFILES); SSF57667 (SUPERFAMILY); SSF57667 (SUPERFAMILY)                                                                                                       |
| 338 | 283595_length_321_cvg_95.8_tip_1_4 | 140   | polycystic kidney disease protein 1-like 2-like             | 107 | 8.01E-10 | 57.60%  | 0.422 Y | IPR002172 (SMART); IPR002172 (G3DSA:4.10.400.GENE3D); IPR002172 (PFAM); IPR002172 (G3DSA:4.10.400.GENE3D); PTHR10529:SF222 (PANTHER); PTHR10529 (PANTHER); IPR023415 (PROSITE_PATTERNS); IPR002172 (PROSITE_PROFILES); IPR002172 (SUPERFAMILY)                                                                                                                                                                                                                                            |
| 339 | 283883_length_322_cvg_2.0_tip_1_5  | 2     | lim domain                                                  | 107 | 1.04E-26 | 87.40%  | 0.099   | IPR001245 (PFAM); G3DSA:1.10.510.10 (GENE3D); PTHR23257:SF94 (PANTHER); PTHR23257 (PANTHER); IPR000719 (PROSITE_PROFILES); IPR011009 (SUPERFAMILY)                                                                                                                                                                                                                                                                                                                                        |
| 340 | 285435_length_326_cvg_81.6_tip_0_2 | 2688  | low quality protein: transmembrane protease serine 11g-like | 108 | 2.64E-15 | 58.60%  | 0.117   | G3DSA:2.40.10.10 (GENE3D); IPR001254 (PFAM); PTHR24275 (PANTHER); IPR018114 (PROSITE_PATTERNS); IPR001254 (PROSITE_PROFILES); IPR009003 (SUPERFAMILY)                                                                                                                                                                                                                                                                                                                                     |
| 341 | 285673_length_326_cvg_3.0_tip_1_2  | 3     | 12 kda fk506-binding protein                                | 108 | 9.28E-44 | 88.40%  | 0.251   | G3DSA:3.10.50.40 (GENE3D); IPR001179 (PFAM); PTHR10516:SF272 (PANTHER); IPR023566 (PANTHER); IPR001179 (PROSITE_PROFILES); SSF54534 (SUPERFAMILY)                                                                                                                                                                                                                                                                                                                                         |
| 342 | 287179_length_329_cvg_6.0_tip_1_1  | 1     | hemagglutinin amebocyte aggregation factor-like             | 110 | 3.64E-20 | 65.70%  | 0.111   | PF14704 (PFAM); IPR026645 (PANTHER)                                                                                                                                                                                                                                                                                                                                                                                                                                                       |
| 343 | 287459_length_330_cvg_2.4_tip_1_0  | 1     | cell surface                                                | 110 | 5.39E-12 | 53.70%  | 0.153   | no IPS match                                                                                                                                                                                                                                                                                                                                                                                                                                                                              |
| 344 | 287459_length_330_cvg_2.4_tip_1_4  | 1     | collagen alpha type                                         | 110 | 3.84E-22 | 71.80%  | 0.12    | IPR008160 (PFAM); PTHR24023:SF372 (PANTHER); PTHR24023 (PANTHER)                                                                                                                                                                                                                                                                                                                                                                                                                          |
| 345 | 287467_length_330_cvg_2.0_tip_1_1  | 1     | zinc finger protein 239                                     | 110 | 1.98E-19 | 61.80%  | 0.101   | IPR015880 (SMART); IPR013087 (G3DSA:3.30.160.GENE3D); IPR013087 (G3DSA:3.30.160.GENE3D); IPR007087 (PFAM); PTHR24409 (PANTHER); PTHR24409:SF14 (PANTHER); IPR007087 (PROSITE_PATTERNS); IPR007087 (PROSITE_PATTERNS); IPR007087 (PROSITE_PROFILES); IPR007087 (PROSITE_PROFILES); SSF57667 (SUPERFAMILY); SSF57667 (SUPERFAMILY)                                                                                                                                                          |
| 347 | 288873_length_333_cvg_2.0_tip_1_3  | 1     | actin-depolymerizing factor                                 | 111 | 1.26E-18 | 66.80%  | 0.102   | IPR007123 (PFAM); IPR029006 (G3DSA:3.40.20.GENE3D); IPR007122 (PANTHER); IPR030004 (PTHR11977:PANTHER); SSF55753 (SUPERFAMILY)                                                                                                                                                                                                                                                                                                                                                            |
| 348 | 288899_length_333_cvg_4.0_tip_1_3  | 2     | #NAME?                                                      | 111 | 5.42E-74 | 100.00% | 0.136   | IPR018389 (PFAM)                                                                                                                                                                                                                                                                                                                                                                                                                                                                          |
| 349 | 288911_length_333_cvg_56.7_tip_1_4 | 11    | dnaj homolog subfamily b member 6-b isoform x1              | 111 | 8.92E-28 | 92.80%  | 0.105   | Coil (COILS); IPR001623 (PRINTS); IPR001623 (SMART); IPR001623 (PFAM); IPR001623 (G3DSA:1.10.287.GENE3D); PTHR24077 (PANTHER); PTHR24077:SF225 (PANTHER); IPR001623 (PROSITE_PROFILES); IPR001623 (SUPERFAMILY)                                                                                                                                                                                                                                                                           |
| 350 | 288981_length_333_cvg_84.3_tip_1_0 | 11554 | proclotting enzyme-like isoform x1                          | 111 | 1.57E-17 | 58.90%  | 0.149   | IPR001254 (PFAM); G3DSA:2.40.10.10 (GENE3D); PTHR24272 (PANTHER); IPR018114 (PROSITE_PATTERNS); IPR001254 (PROSITE_PROFILES); IPR009003 (SUPERFAMILY)                                                                                                                                                                                                                                                                                                                                     |
| 351 | 289973_length_335_cvg_2.7_tip_1_0  | 2     | zinc c2h2 type domain-containing protein                    | 112 | 1.12E-07 | 50.90%  | 0.102   | PF13465 (PFAM)                                                                                                                                                                                                                                                                                                                                                                                                                                                                            |
| 352 | 291251_length_338_cvg_2.0_tip_1_2  | 0     | zinc c2h2 type domain-containing protein                    | 112 | 7.59E-23 | 58.00%  | 0.099   | IPR015880 (SMART); PF13465 (PFAM); IPR013087 (G3DSA:3.30.160.GENE3D); IPR013087 (G3DSA:3.30.160.GENE3D); IPR013087 (G3DSA:3.30.160.GENE3D); PTHR24409:SF14 (PANTHER); PTHR24409 (PANTHER); IPR007087 (PROSITE_PATTERNS); IPR007087 (PROSITE_PATTERNS); IPR007087 (PROSITE_PATTERNS); IPR007087 (PROSITE_PATTERNS); IPR007087 (PROSITE_PROFILES); IPR007087 (PROSITE_PROFILES); IPR007087 (PROSITE_PROFILES); IPR007087 (PROSITE_PROFILES); SSF57667 (SUPERFAMILY); SSF57667 (SUPERFAMILY) |



|     |                                    |       |                                                    |     |          |         |         |                                                                                                                                                                                                                                                                                                                                                                                                                          |
|-----|------------------------------------|-------|----------------------------------------------------|-----|----------|---------|---------|--------------------------------------------------------------------------------------------------------------------------------------------------------------------------------------------------------------------------------------------------------------------------------------------------------------------------------------------------------------------------------------------------------------------------|
| 353 | 291367_length_338_cvg_2.0_tip_1_1  | 2     | 12 kda fk506-binding protein                       | 113 | 1.00E-32 | 97.60%  | 0.11    | G3DSA:3.10.50.40 (GENE3D); IPR001179 (PFAM); PTHR10516:SF260 (PANTHER); IPR023566 (PANTHER); CYTOPLASMIC_DOMAIN (PHOBIUS); TRANSMEMBRANE (PHOBIUS); NON_CYTOPLASMIC_DOMAIN (PHOBIUS); IPR001179 (PROSITE_PROFILES); SSF54534 (SUPERFAMILY); TMhelix (TMHMM)                                                                                                                                                              |
| 354 | 291931_length_340_cvg_2.0_tip_1_5  | 0     | plasma alpha-l-fucosidase                          | 113 | 6.88E-59 | 86.20%  | 0.117   | IPR016286 (PRINTS); IPR000933 (SMART); IPR013781 (G3DSA:3.20.20.GENE3D); IPR000933 (PFAM); PTHR10030:SF26 (PANTHER); IPR000933 (PANTHER); IPR017853 (SUPERFAMILY)                                                                                                                                                                                                                                                        |
| 355 | 292487_length_341_cvg_4.0_tip_1_3  | 1     | flavin-containing monooxygenase 2-like             | 114 | 3.28E-20 | 74.70%  | 0.113   | PR00419 (PRINTS); G3DSA:3.50.50.60 (GENE3D); PF13450 (PFAM); PTHR23023:SF4 (PANTHER); PTHR23023 (PANTHER); SSF51905 (SUPERFAMILY)                                                                                                                                                                                                                                                                                        |
| 356 | 293107_length_342_cvg_13.3_tip_1_0 | 7     | peptidase s8                                       | 114 | 2.26E-09 | 66.80%  | 0.103   | no IPS match                                                                                                                                                                                                                                                                                                                                                                                                             |
| 357 | 293741_length_344_cvg_2.2_tip_1_1  | 0     | family protein                                     | 115 | 1.47E-48 | 99.40%  | 0.125   | IPR004629 (PFAM); IPR004629 (TIGRFAM); CYTOPLASMIC_DOMAIN (PHOBIUS); TRANSMEMBRANE (PHOBIUS); NON_CYTOPLASMIC_DOMAIN (PHOBIUS)                                                                                                                                                                                                                                                                                           |
| 358 | 293975_length_344_cvg_4.6_tip_1_0  | 4     | aldose reductase                                   | 115 | 8.19E-30 | 70.90%  | 0.151   | IPR020471 (PRINTS); IPR023210 (G3DSA:3.20.20.GENE3D); IPR023210 (PFAM); PTHR11732:SF183 (PANTHER); IPR001395 (PANTHER); IPR023210 (SUPERFAMILY)                                                                                                                                                                                                                                                                          |
| 359 | 295365_length_347_cvg_2.0_tip_1_0  | 1     | upf0378 protein k1aa0100                           | 116 | 6.44E-48 | 83.70%  | 0.107   | IPR019443 (PFAM); PTHR15678 (PANTHER); PTHR15678:SF6 (PANTHER)                                                                                                                                                                                                                                                                                                                                                           |
| 360 | 296805_length_351_cvg_20.7_tip_0_0 | 10    | low-density lipoprotein receptor 1                 | 117 | 1.72E-08 | 51.70%  | 0.535 Y | IPR002172 (PRINTS); IPR002172 (G3DSA:4.10.400.GENE3D); IPR002172 (G3DSA:4.10.400.GENE3D); IPR002172 (PFAM); SignalP-noTM (SIGNALP_EUK); IPR002172 (SUPERFAMILY); IPR002172 (SUPERFAMILY); TMhelix (TMHMM)                                                                                                                                                                                                                |
| 361 | 296989_length_351_cvg_4.0_tip_1_5  | 4     | protein p21-like                                   | 117 | 1.31E-33 | 95.80%  | 0.099   | IPR001938 (SMART); IPR001938 (G3DSA:2.60.110.GENE3D); IPR001938 (PFAM); IPR001938 (PANTHER); IPR001938 (PROSITE_PROFILES); IPR001938 (SUPERFAMILY)                                                                                                                                                                                                                                                                       |
| 362 | 297115_length_351_cvg_37.4_tip_0_5 | 15    | dnaj homolog subfamily c member 4 isoform x4       | 117 | 5.02E-18 | 72.80%  | 0.112   | IPR001623 (PRINTS); IPR001623 (SMART); IPR001623 (G3DSA:1.10.287.GENE3D); IPR001623 (PFAM); PTHR24077 (PANTHER); IPR001623 (PROSITE_PROFILES); IPR001623 (SUPERFAMILY)                                                                                                                                                                                                                                                   |
| 364 | 297227_length_352_cvg_63.0_tip_0_1 | 154   | muscle m-line assembly protein unc-89-like         | 117 | 2.03E-49 | 83.10%  | 0.106   | IPR003598 (SMART); IPR003599 (SMART); IPR013098 (PFAM); IPR013783 (G3DSA:2.60.40.GENE3D); PTHR19897 (PANTHER); PTHR19897:SF155 (PANTHER); IPR007110 (PROSITE_PROFILES); SSF48726 (SUPERFAMILY)                                                                                                                                                                                                                           |
| 363 | 297201_length_352_cvg_2.4_tip_1_3  | 1     | zinc finger protein 235                            | 118 | 2.13E-22 | 58.00%  | 0.114   | IPR015880 (SMART); PF13465 (PFAM); IPR013087 (G3DSA:3.30.160.GENE3D); IPR013087 (G3DSA:3.30.160.GENE3D); PTHR24409:SF14 (PANTHER); PTHR24409 (PANTHER); IPR007087 (PROSITE_PATTERNS); IPR007087 (PROSITE_PATTERNS); IPR007087 (PROSITE_PATTERNS); IPR007087 (PROSITE_PATTERNS); IPR007087 (PROSITE_PROFILES); IPR007087 (PROSITE_PROFILES); IPR007087 (PROSITE_PROFILES); SSF57667 (SUPERFAMILY); SSF57667 (SUPERFAMILY) |
| 365 | 298537_length_355_cvg_27.5_tip_1_5 | 13    | low quality protein: twitchin-like                 | 118 | 7.25E-44 | 82.80%  | 0.239   | IPR003598 (SMART); IPR003599 (SMART); IPR013783 (G3DSA:2.60.40.GENE3D); IPR013098 (PFAM); PTHR19897 (PANTHER); IPR007110 (PROSITE_PROFILES); SSF48726 (SUPERFAMILY)                                                                                                                                                                                                                                                      |
| 366 | 299003_length_356_cvg_7.9_tip_1_1  | 6     | cyclophilin 2                                      | 119 | 3.95E-34 | 56.00%  | 0.1     | IPR029000 (G3DSA:2.40.100.GENE3D); IPR002130 (PFAM); PTHR11071:SF11 (PANTHER); IPR024936 (PANTHER); IPR002130 (PROSITE_PROFILES); IPR029000 (SUPERFAMILY)                                                                                                                                                                                                                                                                |
| 367 | 299539_length_357_cvg_3.3_tip_1_2  | 4     | adamts-like protein 5                              | 119 | 6.09E-10 | 71.80%  | 0.148   | IPR010294 (PFAM); PTHR13723 (PANTHER); CYTOPLASMIC_DOMAIN (PHOBIUS); NON_CYTOPLASMIC_DOMAIN (PHOBIUS); TRANSMEMBRANE (PHOBIUS)                                                                                                                                                                                                                                                                                           |
| 368 | 300717_length_360_cvg_2.0_tip_1_5  | 1     | partial                                            | 120 | 8.33E-81 | 100.00% | 0.099   | IPR001661 (PFAM); IPR001661 (PANTHER); PTHR23403:SF1 (PANTHER); IPR008928 (SUPERFAMILY)                                                                                                                                                                                                                                                                                                                                  |
| 369 | 300835_length_360_cvg_87.9_tip_0_3 | 66492 | low-density lipoprotein receptor-related protein 5 | 120 | 6.96E-16 | 55.80%  | 0.103   | IPR002172 (PRINTS); IPR002172 (SMART); IPR002172 (G3DSA:4.10.400.GENE3D); IPR002172 (PFAM); PTHR10529 (PANTHER); IPR023415 (PROSITE_PATTERNS); IPR023415 (PROSITE_PATTERNS); IPR002172 (PROSITE_PROFILES); IPR002172 (PROSITE_PROFILES); IPR002172 (SUPERFAMILY); IPR002172 (SUPERFAMILY)                                                                                                                                |
| 370 | 301159_length_361_cvg_5.3_tip_1_5  | 4     | heat shock protein 68-like                         | 120 | 1.00E-28 | 70.70%  | 0.099   | IPR029048 (G3DSA:1.20.1270.GENE3D); IPR013126 (PFAM); PTHR19375:SF155 (PANTHER); PTHR19375 (PANTHER); IPR029048 (SUPERFAMILY)                                                                                                                                                                                                                                                                                            |
| 371 | 303032_length_365_cvg_2.0_tip_1_3  | 3     | gamma-glutamyltranspeptidase 1                     | 122 | 4.15E-13 | 76.10%  | 0.205   | IPR000101 (PFAM); IPR000101 (PANTHER); PTHR11686:SF15 (PANTHER); IPR029055 (SUPERFAMILY)                                                                                                                                                                                                                                                                                                                                 |
| 372 | 303208_length_365_cvg_7.4_tip_1_0  | 1     | allergen 5                                         | 122 | 1.73E-08 | 72.60%  | 0.206   | IPR002413 (PRINTS); IPR014044 (G3DSA:3.40.33.GENE3D); IPR014044 (SUPERFAMILY)                                                                                                                                                                                                                                                                                                                                            |
| 373 | 304080_length_368_cvg_2.0_tip_1_1  | 2     | zinc finger                                        | 123 | 3.57E-64 | 92.10%  | 0.103   | IPR015880 (SMART); IPR013087 (G3DSA:3.30.160.GENE3D); PF13465 (PFAM); IPR013087 (G3DSA:3.30.160.GENE3D); PF13894 (PFAM); IPR013087 (G3DSA:3.30.160.GENE3D); PTHR24391:SF9 (PANTHER); PTHR24391 (PANTHER); IPR007087 (PROSITE_PATTERNS); IPR007087 (PROSITE_PATTERNS); IPR007087 (PROSITE_PROFILES); IPR007087 (PROSITE_PROFILES); IPR007087 (PROSITE_PROFILES); SSF57667 (SUPERFAMILY); SSF57667 (SUPERFAMILY)           |

|     |                                    |       |                                                                               |     |          |         |         |                                                                                                                                                                                                                                                                                                                                                                                                                                                                                                           |
|-----|------------------------------------|-------|-------------------------------------------------------------------------------|-----|----------|---------|---------|-----------------------------------------------------------------------------------------------------------------------------------------------------------------------------------------------------------------------------------------------------------------------------------------------------------------------------------------------------------------------------------------------------------------------------------------------------------------------------------------------------------|
| 374 | 304094_length_368_cvg_92.9_tip_1_3 | 76389 | elastase 2 precursor                                                          | 123 | 1.29E-21 | 61.70%  | 0.102   | IPR001314 (PRINTS); IPR001254 (SMART); IPR001254 (PFAM); G3DSA:2.40.10.10 (GENE3D); G3DSA:2.40.10.10 (GENE3D); PTHR24265 (PANTHER); IPR018114 (PROSITE_PATTERNS); IPR001254 (PROSITE_PROFILES); IPR009003 (SUPERFAMILY)                                                                                                                                                                                                                                                                                   |
| 375 | 304280_length_368_cvg_4.9_tip_1_1  | 4     | fat-like cadherin-related tumor suppressor partial                            | 123 | 1.38E-43 | 73.30%  | 0.114   | IPR000742 (SMART); IPR001881 (SMART); G3DSA:2.10.25.10 (GENE3D); G3DSA:2.10.25.10 (GENE3D); IPR001881 (PFAM); PTHR24026:SF39 (PANTHER); PTHR24026 (PANTHER); IPR018097 (PROSITE_PATTERNS); IPR000152 (PROSITE_PATTERNS); TRANSMEMBRANE (PHOBIUS); CYTOPLASMIC_DOMAIN (PHOBIUS); NON_CYTOPLASMIC_DOMAIN (PHOBIUS); IPR000742 (PROSITE_PROFILES); IPR000742 (PROSITE_PROFILES); SSF57196 (SUPERFAMILY); TMhelix (TMHMM)                                                                                     |
| 376 | 304798_length_369_cvg_2.0_tip_1_2  | 2     | von willebrand factor type egf and pentraxin domain-containing protein 1-like | 123 | 1.33E-09 | 63.20%  | 0.1     | IPR000436 (SMART); G3DSA:2.10.70.10 (GENE3D); IPR000436 (PFAM); PTHR19325 (PANTHER); NON_CYTOPLASMIC_DOMAIN (PHOBIUS); CYTOPLASMIC_DOMAIN (PHOBIUS); TRANSMEMBRANE (PHOBIUS); IPR000436 (PROSITE_PROFILES); IPR000436 (SUPERFAMILY); TMhelix (TMHMM)                                                                                                                                                                                                                                                      |
| 377 | 305630_length_371_cvg_30.8_tip_1_2 | 38    | transmembrane protease serine 9-like                                          | 123 | 1.15E-08 | 57.50%  | 0.139   | G3DSA:2.40.10.10 (GENE3D); IPR001254 (PFAM); IPR009003 (SUPERFAMILY)                                                                                                                                                                                                                                                                                                                                                                                                                                      |
| 378 | 305984_length_372_cvg_6.4_tip_1_0  | 2     | heat shock cognate protein 70                                                 | 124 | 1.15E-29 | 92.90%  | 0.305   | IPR013126 (PFAM); IPR029048 (G3DSA:1.20.1270.GENE3D); PTHR19375:SF142 (PANTHER); PTHR19375 (PANTHER); CYTOPLASMIC_DOMAIN (PHOBIUS); NON_CYTOPLASMIC_DOMAIN (PHOBIUS); TRANSMEMBRANE (PHOBIUS); IPR029048 (SUPERFAMILY); TMhelix (TMHMM)                                                                                                                                                                                                                                                                   |
| 379 | 306170_length_373_cvg_51.4_tip_0_5 | 29    | wnt inhibitory factor 1 precursor                                             | 124 | 2.28E-69 | 92.20%  | 0.123   | IPR000742 (SMART); G3DSA:2.10.25.10 (GENE3D); IPR013032 (PFAM); IPR000742 (PFAM); PTHR24838:SF276 (PANTHER); PTHR24838 (PANTHER); IPR013032 (PROSITE_PATTERNS); IPR013032 (PROSITE_PATTERNS); IPR013032 (PROSITE_PATTERNS); IPR013032 (PROSITE_PATTERNS); IPR013032 (PROSITE_PATTERNS); IPR000742 (PROSITE_PROFILES); IPR000742 (PROSITE_PROFILES); SSF57196 (SUPERFAMILY)                                                                                                                                |
| 380 | 306180_length_373_cvg_3.0_tip_1_1  | 4     | cathepsin I                                                                   | 124 | 2.24E-29 | 71.30%  | 0.333   | IPR013201 (SMART); G3DSA:3.90.70.10 (GENE3D); IPR013201 (PFAM); IPR013128 (PANTHER); PTHR12411:SF289 (PANTHER); CYTOPLASMIC_DOMAIN (PHOBIUS); TRANSMEMBRANE (PHOBIUS); NON_CYTOPLASMIC_DOMAIN (PHOBIUS); SSF54001 (SUPERFAMILY)                                                                                                                                                                                                                                                                           |
| 381 | 307714_length_376_cvg_2.0_tip_1_4  | 2     | hemagglutinin amebocyte aggregation factor-like                               | 125 | 6.46E-18 | 68.40%  | 0.131   | PF14704 (PFAM); IPR026645 (PANTHER)                                                                                                                                                                                                                                                                                                                                                                                                                                                                       |
| 382 | 308036_length_377_cvg_2.0_tip_1_1  | 3     | lipophorin receptor                                                           | 126 | 8.25E-25 | 68.60%  | 0.099   | G3DSA:2.10.25.10 (GENE3D); PF14670 (PFAM); PTHR10529:SF208 (PANTHER); PTHR10529 (PANTHER); SSF57196 (SUPERFAMILY)                                                                                                                                                                                                                                                                                                                                                                                         |
| 383 | 309180_length_380_cvg_2.0_tip_1_5  | 3     | carbonic anhydrase isoform a                                                  | 126 | 6.23E-11 | 57.60%  | 0.629 Y | IPR001148 (G3DSA:3.10.200.GENE3D); IPR001148 (PFAM); IPR023561 (PANTHER); SIGNAL_PEPTIDE_N_REGION (PHOBIUS); SIGNAL_PEPTIDE_H_REGION (PHOBIUS); SIGNAL_PEPTIDE (PHOBIUS); NON_CYTOPLASMIC_DOMAIN (PHOBIUS); SIGNAL_PEPTIDE_C_REGION (PHOBIUS); IPR001148 (PROSITE_PROFILES); SignalP-noTM (SIGNALP_EUK); IPR001148 (SUPERFAMILY)                                                                                                                                                                          |
| 384 | 309426_length_380_cvg_4.6_tip_1_2  | 6     | vesicle-fusing atpase 1                                                       | 126 | 2.57E-70 | 91.70%  | 0.104   | IPR027417 (G3DSA:3.40.50.GENE3D); IPR003959 (PFAM); PTHR23078 (PANTHER); IPR027417 (SUPERFAMILY)                                                                                                                                                                                                                                                                                                                                                                                                          |
| 385 | 310200_length_382_cvg_2.0_tip_1_1  | 2     | poxb regulator partial                                                        | 127 | 2.75E-90 | 100.00% | 0.137   | IPR018149 (PRINTS); IPR004364 (PFAM); G3DSA:3.30.930.10 (GENE3D); IPR018150 (PANTHER); IPR004525 (PTHR22594:PANTHER); SSF55681 (SUPERFAMILY)                                                                                                                                                                                                                                                                                                                                                              |
| 386 | 310352_length_382_cvg_3.0_tip_1_5  | 3     | partial                                                                       | 127 | 1.46E-14 | 62.30%  | 0.108   | IPR005203 (G3DSA:2.60.40.GENE3D); IPR005203 (PFAM); IPR013788 (PANTHER); PTHR11511:SF24 (PANTHER); IPR014756 (SUPERFAMILY)                                                                                                                                                                                                                                                                                                                                                                                |
| 387 | 310426_length_383_cvg_2.5_tip_1_1  | 3     | zinc finger protein                                                           | 128 | 1.28E-21 | 57.60%  | 0.099   | IPR015880 (SMART); IPR013087 (G3DSA:3.30.160.GENE3D); PF13465 (PFAM); PF13894 (PFAM); IPR013087 (G3DSA:3.30.160.GENE3D); IPR013087 (G3DSA:3.30.160.GENE3D); PTHR24409 (PANTHER); PTHR24409:SF14 (PANTHER); IPR007087 (PROSITE_PATTERNS); IPR007087 (PROSITE_PATTERNS); IPR007087 (PROSITE_PATTERNS); IPR007087 (PROSITE_PATTERNS); IPR007087 (PROSITE_PROFILES); IPR007087 (PROSITE_PROFILES); IPR007087 (PROSITE_PROFILES); IPR007087 (PROSITE_PROFILES); SSF57667 (SUPERFAMILY); SSF57667 (SUPERFAMILY) |
| 388 | 310984_length_384_cvg_2.9_tip_1_2  | 4     | collagen alpha-1 chain-like                                                   | 128 | 1.05E-18 | 61.40%  | 0.107   | IPR008160 (PFAM); PTHR24023:SF379 (PANTHER); PTHR24023 (PANTHER)                                                                                                                                                                                                                                                                                                                                                                                                                                          |
| 389 | 310984_length_384_cvg_2.9_tip_1_5  | 4     | collagen-like protein                                                         | 128 | 7.74E-14 | 49.90%  | 0.147   | no IPS match                                                                                                                                                                                                                                                                                                                                                                                                                                                                                              |
| 390 | 311402_length_385_cvg_3.7_tip_1_2  | 4     | adam 17-like protease                                                         | 128 | 1.21E-32 | 67.10%  | 0.111   | IPR024079 (G3DSA:3.40.390.GENE3D); PTHR11905:SF121 (PANTHER); PTHR11905 (PANTHER); CYTOPLASMIC_DOMAIN (PHOBIUS); NON_CYTOPLASMIC_DOMAIN (PHOBIUS); TRANSMEMBRANE (PHOBIUS); CYTOPLASMIC_DOMAIN (PHOBIUS); TRANSMEMBRANE (PHOBIUS); TMhelix (TMHMM)                                                                                                                                                                                                                                                        |
| 392 | 312112_length_386_cvg_3.0_tip_1_2  | 3     | c-ter truncated protein                                                       | 128 | 1.21E-86 | 99.80%  | 0.117   | G3DSA:3.80.10.10 (GENE3D); SSF52058 (SUPERFAMILY)                                                                                                                                                                                                                                                                                                                                                                                                                                                         |

|     |                                    |       |                                                                  |     |          |         |         |                                                                                                                                                                                                                                                                                                                                                                |
|-----|------------------------------------|-------|------------------------------------------------------------------|-----|----------|---------|---------|----------------------------------------------------------------------------------------------------------------------------------------------------------------------------------------------------------------------------------------------------------------------------------------------------------------------------------------------------------------|
| 393 | 312136_length_386_cvg_9.2_tip_1_2  | 8     | von willebrand factor                                            | 128 | 8.21E-07 | 48.20%  | 0.102   | no IPS match                                                                                                                                                                                                                                                                                                                                                   |
| 391 | 311666_length_385_cvg_3.2_tip_1_0  | 4     | tyrosine-protein kinase ryk-like                                 | 129 | 9.12E-14 | 84.30%  | 0.117   | IPR001245 (PFAM); G3DSA:1.10.510.10 (GENE3D); PTHR24416 (PANTHER); PTHR24416:SF256 (PANTHER); IPR008266 (PROSITE_PATTERNS); IPR000719 (PROSITE_PROFILES); IPR011009 (SUPERFAMILY)                                                                                                                                                                              |
| 424 | 326392_length_421_cvg_59.9_tip_1_0 | 206   | hemagglutinin amebocyte aggregation factor-like                  | 129 | 1.28E-14 | 66.90%  | 0.16    | PF14704 (PFAM); IPR026645 (PANTHER); CYTOPLASMIC_DOMAIN (PHOBIUS); NON_CYTOPLASMIC_DOMAIN (PHOBIUS); CYTOPLASMIC_DOMAIN (PHOBIUS); TRANSMEMBRANE (PHOBIUS); TRANSMEMBRANE (PHOBIUS); TMhelix (TMHMM); TMhelix (TMHMM)                                                                                                                                          |
| 394 | 313369_length_389_cvg_3.1_tip_1_3  | 2     | nedd4 family-interacting protein 1-like                          | 130 | 6.49E-58 | 83.40%  | 0.126   | IPR019325 (PFAM); PTHR13396 (PANTHER); TRANSMEMBRANE (PHOBIUS); NON_CYTOPLASMIC_DOMAIN (PHOBIUS); TRANSMEMBRANE (PHOBIUS); TRANSMEMBRANE (PHOBIUS); NON_CYTOPLASMIC_DOMAIN (PHOBIUS); CYTOPLASMIC_DOMAIN (PHOBIUS); NON_CYTOPLASMIC_DOMAIN (PHOBIUS); TRANSMEMBRANE (PHOBIUS); CYTOPLASMIC_DOMAIN (PHOBIUS); TMhelix (TMHMM); TMhelix (TMHMM); TMhelix (TMHMM) |
| 395 | 313647_length_390_cvg_7.1_tip_1_0  | 8     | peptidase s8                                                     | 130 | 2.47E-12 | 68.30%  | 0.361 Y | SIGNAL_PEPTIDE_C_REGION (PHOBIUS); SIGNAL_PEPTIDE (PHOBIUS); NON_CYTOPLASMIC_DOMAIN (PHOBIUS); SIGNAL_PEPTIDE_N_REGION (PHOBIUS); SIGNAL_PEPTIDE_H_REGION (PHOBIUS)                                                                                                                                                                                            |
| 396 | 313669_length_390_cvg_98.8_tip_1_0 | 768   | carboxypeptidase a2-like                                         | 130 | 9.09E-11 | 57.90%  | 0.247   | IPR003146 (PFAM); IPR003146 (G3DSA:3.30.70.GENE3D); PTHR11705 (PANTHER); TRANSMEMBRANE (PHOBIUS); NON_CYTOPLASMIC_DOMAIN (PHOBIUS); CYTOPLASMIC_DOMAIN (PHOBIUS); IPR009020 (SUPERFAMILY); TMhelix (TMHMM)                                                                                                                                                     |
| 398 | 314219_length_391_cvg_2.6_tip_1_2  | 4     | complement c1q-like protein 4 isoform x2                         | 130 | 1.16E-06 | 52.50%  | 0.156   | IPR001073 (PFAM); IPR008983 (G3DSA:2.60.120.GENE3D); IPR001073 (PROSITE_PROFILES); IPR008983 (SUPERFAMILY)                                                                                                                                                                                                                                                     |
| 411 | 319977_length_405_cvg_12.5_tip_1_0 | 13    | phospholipase a2 isozymes pa3a pa3b partial                      | 130 | 7.38E-17 | 51.30%  | 0.104   | IPR016090 (G3DSA:1.20.90.GENE3D); IPR001211 (PFAM); PTHR12253 (PANTHER); PTHR12253:SF8 (PANTHER); IPR016090 (SUPERFAMILY)                                                                                                                                                                                                                                      |
| 416 | 322165_length_410_cvg_54.8_tip_1_3 | 151   | hemagglutinin amebocyte aggregation factor-like                  | 130 | 4.32E-16 | 67.70%  | 0.177   | PF14704 (PFAM); IPR026645 (PANTHER)                                                                                                                                                                                                                                                                                                                            |
| 397 | 313973_length_391_cvg_65.6_tip_1_0 | 910   | chitinase partial                                                | 131 | 3.19E-12 | 54.00%  | 0.105   | IPR001223 (PFAM); IPR013781 (G3DSA:3.20.20.GENE3D); IPR017853 (SUPERFAMILY)                                                                                                                                                                                                                                                                                    |
| 399 | 314601_length_392_cvg_3.7_tip_1_1  | 2     | tyrosine-protein kinase dnt-like                                 | 131 | 1.58E-24 | 85.40%  | 0.113   | IPR001245 (PFAM); G3DSA:1.10.510.10 (GENE3D); PTHR24416:SF302 (PANTHER); PTHR24416 (PANTHER); IPR011009 (SUPERFAMILY)                                                                                                                                                                                                                                          |
| 400 | 315893_length_395_cvg_2.0_tip_1_1  | 3     | catalase-like isoform x1                                         | 132 | 1.93E-34 | 79.20%  | 0.32    | IPR011614 (G3DSA:2.40.180.GENE3D); IPR011614 (PFAM); IPR018028 (PANTHER); IPR018028 (PROSITE_PROFILES); IPR020835 (SUPERFAMILY)                                                                                                                                                                                                                                |
| 401 | 316635_length_397_cvg_16.8_tip_1_4 | 13    | protein vein                                                     | 132 | 1.40E-33 | 60.20%  | 0.126   | IPR000742 (SMART); IPR013783 (G3DSA:2.60.40.GENE3D); G3DSA:2.10.25.10 (GENE3D); IPR000742 (PFAM); PTHR11100 (PANTHER); IPR013032 (PROSITE_PATTERNS); IPR013032 (PROSITE_PATTERNS); IPR007110 (PROSITE_PROFILES); IPR000742 (PROSITE_PROFILES); SSF57196 (SUPERFAMILY); SSF48726 (SUPERFAMILY)                                                                  |
| 403 | 316853_length_398_cvg_60.7_tip_0_5 | 46    | PREDICTED: putative uncharacterized protein ART2-like, partial   | 132 | 2.01E-10 | 74.10%  | 0.114   | no IPS match                                                                                                                                                                                                                                                                                                                                                   |
| 402 | 316655_length_397_cvg_2.0_tip_1_3  | 2     | venom serine carboxypeptidase-like                               | 133 | 4.65E-27 | 69.40%  | 0.105   | IPR029058 (G3DSA:3.40.50.GENE3D); IPR001563 (PFAM); IPR001563 (PANTHER); IPR018202 (PROSITE_PATTERNS); IPR029058 (SUPERFAMILY)                                                                                                                                                                                                                                 |
| 404 | 317037_length_398_cvg_2.0_tip_1_3  | 2     | tryptophan partial                                               | 133 | 5.76E-28 | 100.00% | 0.106   | IPR018227 (PFAM); IPR015422 (G3DSA:3.90.1150.GENE3D); PTHR32195:SF11 (PANTHER); PTHR32195 (PANTHER); IPR013061 (PROSITE_PATTERNS); CYTOPLASMIC_DOMAIN (PHOBIUS); NON_CYTOPLASMIC_DOMAIN (PHOBIUS); TRANSMEMBRANE (PHOBIUS); CYTOPLASMIC_DOMAIN (PHOBIUS); TRANSMEMBRANE (PHOBIUS); IPR015424 (SUPERFAMILY); TMhelix (TMHMM); TMhelix (TMHMM)                   |
| 406 | 318163_length_401_cvg_2.0_tip_1_5  | 1     | gelsolin                                                         | 133 | 4.59E-34 | 74.60%  | 0.215   | IPR029006 (G3DSA:3.40.20.GENE3D); IPR030004 (PTHR11977:PANTHER); IPR007122 (PANTHER); SSF55753 (SUPERFAMILY)                                                                                                                                                                                                                                                   |
| 405 | 318159_length_401_cvg_74.8_tip_0_0 | 91965 | serine protease like protein                                     | 134 | 3.58E-22 | 57.30%  | 0.1     | IPR001314 (PRINTS); IPR001254 (SMART); IPR001254 (PFAM); G3DSA:2.40.10.10 (GENE3D); G3DSA:2.40.10.10 (GENE3D); PTHR24268 (PANTHER); IPR018114 (PROSITE_PATTERNS); IPR001254 (PROSITE_PROFILES); IPR009003 (SUPERFAMILY)                                                                                                                                        |
| 407 | 318371_length_401_cvg_2.4_tip_1_3  | 3     | mam and ldl-receptor class a domain-containing protein 2-like    | 134 | 7.87E-12 | 56.80%  | 0.151   | IPR002172 (SMART); IPR002172 (G3DSA:4.10.400.GENE3D); NON_CYTOPLASMIC_DOMAIN (PHOBIUS); CYTOPLASMIC_DOMAIN (PHOBIUS); TRANSMEMBRANE (PHOBIUS); IPR002172 (SUPERFAMILY); TMhelix (TMHMM)                                                                                                                                                                        |
| 408 | 319001_length_403_cvg_63.0_tip_0_4 | 11756 | ves g 5 allergen                                                 | 134 | 2.94E-20 | 58.30%  | 0.105   | IPR002413 (PRINTS); IPR001283 (PRINTS); IPR014044 (G3DSA:3.40.33.GENE3D); IPR014044 (PFAM); IPR001283 (PANTHER); IPR018244 (PROSITE_PATTERNS); IPR014044 (SUPERFAMILY)                                                                                                                                                                                         |
| 409 | 319263_length_403_cvg_2.0_tip_1_5  | 4     | ectonucleoside triphosphate diphosphohydrolase 4-like isoform x2 | 134 | 8.04E-47 | 73.30%  | 0.118   | IPR000407 (PFAM); PTHR11782:SF37 (PANTHER); IPR000407 (PANTHER); IPR000407 (PROSITE_PATTERNS)                                                                                                                                                                                                                                                                  |



|     |                                   |   |                                                                     |     |          |         |         |                                                                                                                                                                                                                                                                                                                                                                                                                                                                                                                                                                                                                                         |
|-----|-----------------------------------|---|---------------------------------------------------------------------|-----|----------|---------|---------|-----------------------------------------------------------------------------------------------------------------------------------------------------------------------------------------------------------------------------------------------------------------------------------------------------------------------------------------------------------------------------------------------------------------------------------------------------------------------------------------------------------------------------------------------------------------------------------------------------------------------------------------|
| 410 | 319671_length_404_cvg_2.0_tip_1_0 | 3 | zinc finger and scan domain-containing protein 2-like               | 135 | 2.18E-23 | 61.00%  | 0.123   | IPR015880 (SMART); IPR013087 (G3DSA:3.30.160.GENE3D); IPR013087 (G3DSA:3.30.160.GENE3D); PF13465 (PFAM); IPR007087 (PFAM); PTHR24409 (PANTHER); IPR007087 (PROSITE_PATTERNS); IPR007087 (PROSITE_PATTERNS); IPR007087 (PROSITE_PATTERNS); IPR007087 (PROSITE_PROFILES); IPR007087 (PROSITE_PROFILES); IPR007087 (PROSITE_PROFILES); SSF57667 (SUPERFAMILY); SSF57667 (SUPERFAMILY); SSF57667 (SUPERFAMILY)                                                                                                                                                                                                                              |
| 412 | 320001_length_405_cvg_3.0_tip_1_2 | 4 | lipophorin receptor                                                 | 135 | 1.55E-51 | 79.00%  | 0.109   | IPR000033 (SMART); IPR000033 (PFAM); IPR011042 (G3DSA:2.120.10.GENE3D); PTHR10529:SF208 (PANTHER); PTHR10529 (PANTHER); IPR000033 (PROSITE_PROFILES); IPR000033 (PROSITE_PROFILES); IPR000033 (PROSITE_PROFILES); SSF63825 (SUPERFAMILY)                                                                                                                                                                                                                                                                                                                                                                                                |
| 413 | 320151_length_405_cvg_3.6_tip_1_5 | 3 | neurogenic locus notch partial                                      | 135 | 7.02E-60 | 86.90%  | 0.112   | PR00010 (PRINTS); IPR001881 (SMART); IPR000742 (SMART); G3DSA:2.10.25.10 (GENE3D); IPR000742 (PFAM); G3DSA:2.10.25.10 (GENE3D); G3DSA:2.10.25.10 (GENE3D); PTHR24033:SF36 (PANTHER); PTHR24033 (PANTHER); IPR013032 (PROSITE_PATTERNS); IPR013032 (PROSITE_PATTERNS); IPR000152 (PROSITE_PATTERNS); IPR018097 (PROSITE_PATTERNS); IPR018097 (PROSITE_PATTERNS); IPR000152 (PROSITE_PATTERNS); IPR018097 (PROSITE_PATTERNS); IPR013032 (PROSITE_PATTERNS); IPR013032 (PROSITE_PATTERNS); IPR000152 (PROSITE_PATTERNS); IPR000742 (PROSITE_PROFILES); IPR000742 (PROSITE_PROFILES); IPR000742 (PROSITE_PROFILES); IPR009030 (SUPERFAMILY) |
| 414 | 320827_length_407_cvg_3.2_tip_1_1 | 5 | b-cell lymphoma                                                     | 136 | 4.45E-56 | 91.20%  | 0.113   | IPR015880 (SMART); IPR013087 (G3DSA:3.30.160.GENE3D); IPR013087 (G3DSA:3.30.160.GENE3D); PF13465 (PFAM); IPR007087 (PFAM); PTHR23233:SF1 (PANTHER); PTHR23233 (PANTHER); IPR007087 (PROSITE_PATTERNS); IPR007087 (PROSITE_PATTERNS); IPR007087 (PROSITE_PROFILES); IPR007087 (PROSITE_PROFILES); SSF57667 (SUPERFAMILY); SSF57667 (SUPERFAMILY)                                                                                                                                                                                                                                                                                         |
| 415 | 321041_length_408_cvg_3.0_tip_1_5 | 5 | xanthine dehydrogenase                                              | 136 | 4.06E-35 | 68.60%  | 0.102   | IPR016167 (G3DSA:3.30.43.GENE3D); IPR002346 (PFAM); PTHR11908 (PANTHER); PTHR11908:SF32 (PANTHER); IPR016166 (SUPERFAMILY)                                                                                                                                                                                                                                                                                                                                                                                                                                                                                                              |
| 417 | 322195_length_410_cvg_2.0_tip_1_4 | 3 | pa domain-containing protein                                        | 137 | 2.06E-44 | 77.70%  | 0.102   | G3DSA:3.50.30.30 (GENE3D); IPR003137 (PFAM); PTHR22702 (PANTHER)                                                                                                                                                                                                                                                                                                                                                                                                                                                                                                                                                                        |
| 418 | 323039_length_412_cvg_3.0_tip_1_0 | 3 | dermatopontin 2                                                     | 138 | 8.63E-18 | 58.20%  | 0.247   | PF14704 (PFAM); IPR026645 (PANTHER); TRANSMEMBRANE (PHOBIUS); CYTOPLASMIC_DOMAIN (PHOBIUS); NON_CYTOPLASMIC_DOMAIN (PHOBIUS); TMhelix (TMHMM)                                                                                                                                                                                                                                                                                                                                                                                                                                                                                           |
| 419 | 324163_length_415_cvg_2.0_tip_1_2 | 5 | microtubule-associated serine threonine-protein kinase 3 isoform x1 | 138 | 1.18E-82 | 94.00%  | 0.131   | IPR002290 (SMART); G3DSA:1.10.510.10 (GENE3D); IPR000719 (PFAM); PTHR24356 (PANTHER); PTHR24356:SF36 (PANTHER); NON_CYTOPLASMIC_DOMAIN (PHOBIUS); TRANSMEMBRANE (PHOBIUS); CYTOPLASMIC_DOMAIN (PHOBIUS); IPR000719 (PROSITE_PROFILES); IPR000961 (PROSITE_PROFILES); IPR011009 (SUPERFAMILY)                                                                                                                                                                                                                                                                                                                                            |
| 420 | 324440_length_416_cvg_3.9_tip_1_3 | 4 | 7-alpha-hydroxysteroid dehydrogenase                                | 139 | 6.64E-96 | 100.00% | 0.103   | IPR002198 (PRINTS); IPR002347 (PRINTS); IPR002198 (PFAM); IPR016040 (G3DSA:3.40.50.GENE3D); PTHR24322:SF166 (PANTHER); PTHR24322 (PANTHER); IPR020904 (PROSITE_PATTERNS); SSF51735 (SUPERFAMILY)                                                                                                                                                                                                                                                                                                                                                                                                                                        |
| 421 | 325038_length_417_cvg_2.0_tip_1_2 | 3 | gamma-glutamyltransferase                                           | 139 | 1.28E-93 | 99.70%  | 0.105   | IPR000101 (PRINTS); IPR000101 (PFAM); IPR000101 (PANTHER); PTHR11686:SF9 (PANTHER); IPR029055 (SUPERFAMILY)                                                                                                                                                                                                                                                                                                                                                                                                                                                                                                                             |
| 422 | 325140_length_418_cvg_2.6_tip_1_1 | 4 | gastrula zinc finger isoform x1                                     | 139 | 3.93E-46 | 71.30%  | 0.106   | IPR015880 (SMART); IPR013087 (G3DSA:3.30.160.GENE3D); PF13465 (PFAM); IPR013087 (G3DSA:3.30.160.GENE3D); IPR013087 (G3DSA:3.30.160.GENE3D); IPR013087 (G3DSA:3.30.160.GENE3D); PTHR24409 (PANTHER); IPR007087 (PROSITE_PATTERNS); IPR007087 (PROSITE_PATTERNS); IPR007087 (PROSITE_PATTERNS); IPR007087 (PROSITE_PROFILES); IPR007087 (PROSITE_PROFILES); IPR007087 (PROSITE_PROFILES); IPR007087 (PROSITE_PROFILES); SSF57667 (SUPERFAMILY); SSF57667 (SUPERFAMILY); SSF57667 (SUPERFAMILY)                                                                                                                                            |
| 423 | 325200_length_418_cvg_3.0_tip_1_5 | 4 | astacin-like metalloprotease partial                                | 139 | 2.73E-10 | 50.40%  | 0.849 Y | IPR001506 (PFAM); IPR024079 (G3DSA:3.40.390.GENE3D); SIGNAL_PEPTIDE_H_REGION (PHOBIUS); SIGNAL_PEPTIDE_C_REGION (PHOBIUS); SIGNAL_PEPTIDE (PHOBIUS); SIGNAL_PEPTIDE_N_REGION (PHOBIUS); NON_CYTOPLASMIC_DOMAIN (PHOBIUS); SignalP-noTM (SIGNALP_EUK); SSF55486 (SUPERFAMILY); TMhelix (TMHMM)                                                                                                                                                                                                                                                                                                                                           |
| 425 | 327388_length_423_cvg_4.0_tip_1_5 | 4 | hypothetical protein X975_25329, partial                            | 141 | 4.14E-36 | 63.00%  | 0.099   | PTHR23022 (PANTHER); PTHR23022:SF53 (PANTHER)                                                                                                                                                                                                                                                                                                                                                                                                                                                                                                                                                                                           |
| 427 | 327842_length_424_cvg_2.0_tip_1_1 | 1 | thioredoxin                                                         | 141 | 2.31E-93 | 99.80%  | 0.343 Y | PR00421 (PRINTS); IPR012336 (G3DSA:3.40.30.GENE3D); IPR005746 (TIGRFAM); IPR013766 (PFAM); PTHR10438:SF253 (PANTHER); IPR005746 (PANTHER); IPR017937 (PROSITE_PATTERNS); IPR012336 (PROSITE_PROFILES); IPR012336 (SUPERFAMILY)                                                                                                                                                                                                                                                                                                                                                                                                          |

|     |                                     |        |                                                                    |     |          |        |       |                                                                                                                                                                                                                                                                                                                                                                                                                       |
|-----|-------------------------------------|--------|--------------------------------------------------------------------|-----|----------|--------|-------|-----------------------------------------------------------------------------------------------------------------------------------------------------------------------------------------------------------------------------------------------------------------------------------------------------------------------------------------------------------------------------------------------------------------------|
| 428 | 327904_length_424_cvg_6.1_tip_1_2   | 4      | cytochrome p450 partial                                            | 141 | 4.12E-46 | 69.20% | 0.1   | IPR001128 (PRINTS); IPR002401 (PRINTS); IPR001128 (G3DSA:1.10.630.GENE3D); IPR001128 (PFAM); PTHR24291 (PANTHER); IPR017972 (PROSITE_PATTERNS); IPR001128 (SUPERFAMILY)                                                                                                                                                                                                                                               |
| 426 | 327634_length_424_cvg_7.7_tip_1_0   | 11     | PREDICTED: uncharacterized protein C15orf61-like                   | 142 | 5.96E-41 | 77.60% | 0.339 | IPR029245 (PFAM)                                                                                                                                                                                                                                                                                                                                                                                                      |
| 429 | 328084_length_425_cvg_4.0_tip_1_4   | 1      | serine protease inhibitor dipetalogastin precursor                 | 142 | 9.12E-17 | 51.20% | 0.102 | IPR002350 (SMART); IPR002350 (PFAM); G3DSA:3.30.60.30 (GENE3D); PTHR10913 (PANTHER); PTHR10913:SF46 (PANTHER); IPR002350 (PROSITE_PROFILES); IPR002350 (PROSITE_PROFILES); IPR002350 (PROSITE_PROFILES); SSF100895 (SUPERFAMILY); SSF100895 (SUPERFAMILY)                                                                                                                                                             |
| 430 | 328158_length_425_cvg_102.8_tip_0_0 | 92927  | clotting factor partial                                            | 142 | 9.89E-16 | 70.40% | 0.119 | G3DSA:2.40.10.10 (GENE3D); IPR001254 (PFAM); PTHR24275 (PANTHER); IPR018114 (PROSITE_PATTERNS); IPR001254 (PROSITE_PROFILES); IPR009003 (SUPERFAMILY)                                                                                                                                                                                                                                                                 |
| 431 | 328524_length_426_cvg_2.0_tip_1_2   | 3      | protein flightless-1                                               | 142 | 7.70E-67 | 87.60% | 0.131 | IPR003591 (SMART); IPR001611 (PFAM); G3DSA:3.80.10.10 (GENE3D); IPR001611 (PFAM); IPR007122 (PANTHER); IPR001611 (PROSITE_PROFILES); IPR001611 (PROSITE_PROFILES); IPR001611 (PROSITE_PROFILES); IPR001611 (PROSITE_PROFILES); IPR001611 (PROSITE_PROFILES); SSF52058 (SUPERFAMILY)                                                                                                                                   |
| 432 | 328884_length_426_cvg_2.0_tip_1_0   | 2      | kelch-like ech-associated protein 1 isoform x2                     | 142 | 5.79E-80 | 86.40% | 0.102 | IPR011705 (SMART); IPR011705 (PFAM); PTHR24412 (PANTHER); PTHR24412:SF1 (PANTHER)                                                                                                                                                                                                                                                                                                                                     |
| 437 | 329452_length_428_cvg_2.0_tip_1_2   | 2      | low-density lipoprotein receptor-related protein 1b-like           | 142 | 1.54E-14 | 61.70% | 0.269 | IPR002172 (PRINTS); IPR002172 (SMART); IPR002172 (G3DSA:4.10.400.GENE3D); IPR002172 (G3DSA:4.10.400.GENE3D); IPR002172 (PFAM); PTHR10529 (PANTHER); IPR023415 (PROSITE_PATTERNS); IPR023415 (PROSITE_PATTERNS); CYTOPLASMIC_DOMAIN (PHOBIUS); NON_CYTOPLASMIC_DOMAIN (PHOBIUS); TRANSMEMBRANE (PHOBIUS); IPR002172 (PROSITE_PROFILES); IPR002172 (PROSITE_PROFILES); IPR002172 (SUPERFAMILY); IPR002172 (SUPERFAMILY) |
| 433 | 329172_length_427_cvg_63.9_tip_0_0  | 105834 | isoform a                                                          | 143 | 3.13E-27 | 63.20% | 0.111 | IPR001254 (SMART); G3DSA:2.40.10.10 (GENE3D); IPR001254 (PFAM); PTHR24268 (PANTHER); IPR018114 (PROSITE_PATTERNS); IPR001254 (PROSITE_PROFILES); IPR009003 (SUPERFAMILY)                                                                                                                                                                                                                                              |
| 434 | 329294_length_428_cvg_2.0_tip_1_4   | 2      | aminoacylase-1-like isoform 1                                      | 143 | 4.33E-67 | 80.10% | 0.138 | IPR002933 (PFAM); G3DSA:3.40.630.10 (GENE3D); PTHR11014:SF8 (PANTHER); PTHR11014 (PANTHER); IPR001261 (PROSITE_PATTERNS); IPR001261 (PROSITE_PATTERNS); SSF53187 (SUPERFAMILY)                                                                                                                                                                                                                                        |
| 435 | 329356_length_428_cvg_2.0_tip_1_1   | 2      | allatostatin precursor protein                                     | 143 | 3.55E-16 | 51.20% | 0.098 | no IPS match                                                                                                                                                                                                                                                                                                                                                                                                          |
| 436 | 329414_length_428_cvg_78.6_tip_0_3  | 104728 | suppressor of tumorigenicity 14 protein isoform x3                 | 143 | 7.80E-16 | 46.50% | 0.098 | IPR002172 (SMART); IPR002172 (PFAM); IPR001254 (PFAM); G3DSA:2.40.10.10 (GENE3D); IPR002172 (G3DSA:4.10.400.GENE3D); G3DSA:2.40.10.10 (GENE3D); PTHR24256:SF96 (PANTHER); PTHR24256 (PANTHER); IPR023415 (PROSITE_PATTERNS); IPR018114 (PROSITE_PATTERNS); IPR002172 (PROSITE_PROFILES); IPR002172 (SUPERFAMILY); IPR009003 (SUPERFAMILY)                                                                             |
| 438 | 329842_length_429_cvg_58.0_tip_1_0  | 84     | zinc finger protein                                                | 143 | 4.11E-20 | 58.50% | 0.104 | IPR015880 (SMART); PF13465 (PFAM); IPR013087 (G3DSA:3.30.160.GENE3D); IPR007087 (PFAM); IPR013087 (G3DSA:3.30.160.GENE3D); PTHR24409 (PANTHER); IPR007087 (PROSITE_PATTERNS); IPR007087 (PROSITE_PATTERNS); IPR007087 (PROSITE_PATTERNS); IPR007087 (PROSITE_PATTERNS); IPR007087 (PROSITE_PROFILES); IPR007087 (PROSITE_PROFILES); SSF57667 (SUPERFAMILY); SSF57667 (SUPERFAMILY)                                    |
| 439 | 330362_length_430_cvg_2.0_tip_1_2   | 1      | leucine-rich repeat and guanylate kinase domain-containing partial | 143 | 2.25E-13 | 68.10% | 0.104 | PR00019 (PRINTS); SM00365 (SMART); G3DSA:3.80.10.10 (GENE3D); IPR001611 (PFAM); IPR025875 (PFAM); PTHR10588 (PANTHER); TRANSMEMBRANE (PHOBIUS); NON_CYTOPLASMIC_DOMAIN (PHOBIUS); CYTOPLASMIC_DOMAIN (PHOBIUS); IPR001611 (PROSITE_PROFILES); IPR001611 (PROSITE_PROFILES); IPR001611 (PROSITE_PROFILES); IPR001611 (PROSITE_PROFILES); IPR001611 (PROSITE_PROFILES); SSF52058 (SUPERFAMILY)                          |
| 440 | 330716_length_431_cvg_12.6_tip_1_5  | 15     | sterile alpha motif domain-containing protein 13                   | 143 | 2.79E-12 | 85.30% | 0.125 | IPR013761 (G3DSA:1.10.150.GENE3D); IPR021129 (PFAM); PTHR12247 (PANTHER); PTHR12247:SF66 (PANTHER); IPR013761 (SUPERFAMILY)                                                                                                                                                                                                                                                                                           |
| 441 | 330878_length_432_cvg_2.0_tip_1_1   | 3      | retinol dehydrogenase 11-like                                      | 144 | 7.43E-47 | 71.00% | 0.315 | IPR002347 (PRINTS); IPR002198 (PFAM); IPR016040 (G3DSA:3.40.50.GENE3D); PTHR24316 (PANTHER); PTHR24316:SF305 (PANTHER); TRANSMEMBRANE (PHOBIUS); NON_CYTOPLASMIC_DOMAIN (PHOBIUS); CYTOPLASMIC_DOMAIN (PHOBIUS); SSF51735 (SUPERFAMILY); TMhelix (TMHMM)                                                                                                                                                              |
| 442 | 331358_length_433_cvg_5.4_tip_1_5   | 6      | phenoloxidase subunit a3-like                                      | 144 | 1.16E-31 | 60.40% | 0.122 | IPR005203 (PFAM); IPR005203 (G3DSA:2.60.40.GENE3D); PTHR11511:SF24 (PANTHER); IPR013788 (PANTHER); IPR014756 (SUPERFAMILY)                                                                                                                                                                                                                                                                                            |
| 443 | 331514_length_433_cvg_3.0_tip_1_5   | 4      | venom metalloproteinase 3-like                                     | 144 | 2.31E-09 | 47.70% | 0.106 | IPR006586 (SMART)                                                                                                                                                                                                                                                                                                                                                                                                     |
| 444 | 332144_length_435_cvg_2.0_tip_1_1   | 3      | laminin beta 1                                                     | 145 | 3.88E-60 | 73.70% | 0.125 | IPR002049 (SMART); IPR002049 (PFAM); G3DSA:2.10.25.10 (GENE3D); PTHR10574 (PANTHER); PTHR10574:SF238 (PANTHER); IPR002049 (PROSITE_PROFILES); IPR013015 (PROSITE_PROFILES); SSF57196 (SUPERFAMILY)                                                                                                                                                                                                                    |

|     |                                     |        |                                                                                   |     |          |        |         |                                                                                                                                                                                                                                                                                                                                                                                                                                                                                                   |
|-----|-------------------------------------|--------|-----------------------------------------------------------------------------------|-----|----------|--------|---------|---------------------------------------------------------------------------------------------------------------------------------------------------------------------------------------------------------------------------------------------------------------------------------------------------------------------------------------------------------------------------------------------------------------------------------------------------------------------------------------------------|
| 445 | 332198_length_435_cvg_2.0_tip_1_1   | 3      | attractin-like protein 1 isoform x1                                               | 145 | 1.25E-37 | 80.70% | 0.121   | PTHR10574 (PANTHER); PTHR10574:SF3 (PANTHER); TRANSMEMBRANE (PHOBIUS); NON_CYTOPLASMIC_DOMAIN (PHOBIUS); CYTOPLASMIC_DOMAIN (PHOBIUS); CYTOPLASMIC_DOMAIN (PHOBIUS); TRANSMEMBRANE (PHOBIUS); TMhelix (TMHMM)                                                                                                                                                                                                                                                                                     |
| 446 | 332482_length_436_cvg_7.1_tip_1_5   | 7      | cysteine string isoform x1                                                        | 145 | 5.38E-71 | 94.60% | 0.162   | IPR001623 (PRINTS); IPR001623 (SMART); IPR001623 (PFAM); IPR001623 (G3DSA:1.10.287.GENE3D); PTHR24078:SF5 (PANTHER); PTHR24078 (PANTHER); IPR018253 (PROSITE_PATTERNS); IPR001623 (PROSITE_PROFILES); IPR001623 (SUPERFAMILY)                                                                                                                                                                                                                                                                     |
| 447 | 332770_length_436_cvg_37.2_tip_1_1  | 21     | low-density lipoprotein receptor-related protein 2                                | 145 | 5.80E-13 | 67.00% | 0.1     | IPR002172 (SMART); IPR002172 (G3DSA:4.10.400.GENE3D); IPR002172 (PFAM); G3DSA:4.10.1220.10 (GENE3D); PTHR10529 (PANTHER); IPR023415 (PROSITE_PATTERNS); IPR002172 (PROSITE_PROFILES); IPR002172 (SUPERFAMILY)                                                                                                                                                                                                                                                                                     |
| 448 | 333228_length_438_cvg_2.0_tip_1_5   | 3      | cyclin dependent kinase 8                                                         | 146 | 6.47E-95 | 97.30% | 0.102   | IPR002290 (SMART); IPR000719 (PFAM); G3DSA:1.10.510.10 (GENE3D); G3DSA:3.30.200.20 (GENE3D); PTHR24056 (PANTHER); PTHR24056:SF162 (PANTHER); IPR008271 (PROSITE_PATTERNS); IPR000719 (PROSITE_PROFILES); IPR011009 (SUPERFAMILY)                                                                                                                                                                                                                                                                  |
| 449 | 333868_length_439_cvg_2.9_tip_1_2   | 4      | ejaculatory bulb-specific protein 3                                               | 146 | 7.83E-37 | 70.00% | 0.554 Y | IPR005055 (G3DSA:1.10.2080.GENE3D); IPR005055 (PFAM); PTHR11257:SF4 (PANTHER); IPR005055 (PANTHER); CYTOPLASMIC_DOMAIN (PHOBIUS); NON_CYTOPLASMIC_DOMAIN (PHOBIUS); TRANSMEMBRANE (PHOBIUS); SignalP-TM (SIGNALP_EUK); IPR005055 (SUPERFAMILY); TMhelix (TMHMM)                                                                                                                                                                                                                                   |
| 465 | 338474_length_450_cvg_3.0_tip_1_2   | 4      | prostatic acid phosphatase-like                                                   | 146 | 6.38E-13 | 56.00% | 0.097   | IPR029033 (G3DSA:3.40.50.GENE3D); PTHR11567:SF26 (PANTHER); PTHR11567 (PANTHER); CYTOPLASMIC_DOMAIN (PHOBIUS); NON_CYTOPLASMIC_DOMAIN (PHOBIUS); TRANSMEMBRANE (PHOBIUS); IPR029033 (SUPERFAMILY); TMhelix (TMHMM)                                                                                                                                                                                                                                                                                |
| 450 | 334092_length_440_cvg_9.7_tip_1_1   | 10     | er protein gp78                                                                   | 147 | 7.95E-70 | 89.50% | 0.544 Y | IPR013126 (PRINTS); G3DSA:3.30.420.40 (GENE3D); IPR013126 (PFAM); G3DSA:3.30.30.30 (GENE3D); PTHR19375:SF157 (PANTHER); PTHR19375 (PANTHER); IPR018181 (PROSITE_PATTERNS); SIGNAL_PEPTIDE_N_REGION (PHOBIUS); SIGNAL_PEPTIDE (PHOBIUS); NON_CYTOPLASMIC_DOMAIN (PHOBIUS); SIGNAL_PEPTIDE_H_REGION (PHOBIUS); SIGNAL_PEPTIDE_C_REGION (PHOBIUS); SignalP-noTM (SIGNALP_EUK); SSF53067 (SUPERFAMILY)                                                                                                |
| 451 | 334888_length_442_cvg_3.0_tip_1_4   | 6      | gram negative bacteria binding protein 1                                          | 147 | 7.17E-43 | 67.10% | 0.102   | IPR000757 (PFAM); IPR013320 (G3DSA:2.60.120.GENE3D); PTHR10963 (PANTHER); PTHR10963:SF4 (PANTHER); IPR013320 (SUPERFAMILY)                                                                                                                                                                                                                                                                                                                                                                        |
| 452 | 335456_length_443_cvg_2.0_tip_1_5   | 4      | furin-like protease isoform 1-crr isoform x2                                      | 147 | 3.27E-13 | 46.29% | 0.127   | G3DSA:2.10.220.10 (GENE3D); IPR009030 (SUPERFAMILY)                                                                                                                                                                                                                                                                                                                                                                                                                                               |
| 517 | 352819_length_487_cvg_61.3_tip_1_1  | 756    | ribosomal protein s26                                                             | 147 | 2.02E-59 | 89.70% | 0.106   | IPR000892 (PFAM); IPR000892 (PANTHER); IPR000892 (PROSITE_PATTERNS)                                                                                                                                                                                                                                                                                                                                                                                                                               |
| 453 | 335742_length_444_cvg_112.5_tip_0_2 | 146869 | low-density lipoprotein receptor-related protein 2                                | 148 | 1.36E-19 | 63.90% | 0.492 Y | IPR002172 (PRINTS); IPR002172 (SMART); IPR002172 (PFAM); IPR002172 (G3DSA:4.10.400.GENE3D); IPR002172 (G3DSA:4.10.400.GENE3D); PTHR10529 (PANTHER); IPR023415 (PROSITE_PATTERNS); IPR023415 (PROSITE_PROFILES); SIGNAL_PEPTIDE_N_REGION (PHOBIUS); SIGNAL_PEPTIDE (PHOBIUS); SIGNAL_PEPTIDE_H_REGION (PHOBIUS); SIGNAL_PEPTIDE_C_REGION (PHOBIUS); NON_CYTOPLASMIC_DOMAIN (PHOBIUS); IPR002172 (PROSITE_PROFILES); IPR002172 (PROSITE_PROFILES); IPR002172 (SUPERFAMILY); IPR002172 (SUPERFAMILY) |
| 454 | 335776_length_444_cvg_2.3_tip_1_1   | 3      | #NAME?                                                                            | 148 | 1.29E-52 | 81.50% | 0.137   | G3DSA:3.40.50.2000 (GENE3D); IPR001830 (PFAM); PTHR10788:SF6 (PANTHER); PTHR10788 (PANTHER); SSF53756 (SUPERFAMILY)                                                                                                                                                                                                                                                                                                                                                                               |
| 455 | 336054_length_445_cvg_2.6_tip_1_5   | 4      | gels_homam ame: full= cytoplasmic ame: full=actin-depolymerizing factor short=adf | 148 | 1.67E-40 | 78.30% | 0.2     | IPR007122 (SMART); IPR007123 (PFAM); IPR029006 (G3DSA:3.40.20.GENE3D); IPR007122 (PANTHER); SSF55753 (SUPERFAMILY)                                                                                                                                                                                                                                                                                                                                                                                |
| 456 | 336572_length_446_cvg_63.0_tip_0_2  | 178    | vitellogenin receptor                                                             | 148 | 3.10E-17 | 52.00% | 0.127   | IPR002172 (PRINTS); IPR002172 (SMART); IPR002172 (G3DSA:4.10.400.GENE3D); IPR002172 (PFAM); IPR002172 (G3DSA:4.10.400.GENE3D); PTHR10529 (PANTHER); IPR023415 (PROSITE_PATTERNS); IPR002172 (PROSITE_PROFILES); IPR002172 (PROSITE_PROFILES); IPR002172 (SUPERFAMILY); IPR002172 (SUPERFAMILY)                                                                                                                                                                                                    |
| 457 | 336872_length_447_cvg_2.0_tip_1_1   | 3      | protein lap4 isoform x4                                                           | 149 | 8.02E-82 | 92.90% | 0.103   | IPR003591 (SMART); G3DSA:3.80.10.10 (GENE3D); IPR025875 (PFAM); IPR001611 (PFAM); G3DSA:3.80.10.10 (GENE3D); PTHR23155 (PANTHER); PTHR23155:SF31 (PANTHER); IPR001611 (PROSITE_PROFILES); IPR001611 (PROSITE_PROFILES); IPR001611 (PROSITE_PROFILES); IPR001611 (PROSITE_PROFILES); IPR001611 (PROSITE_PROFILES); SSF52058 (SUPERFAMILY)                                                                                                                                                          |
| 458 | 337166_length_447_cvg_7.7_tip_1_1   | 9      | serine protease nudel                                                             | 149 | 2.27E-20 | 55.10% | 0.129   | IPR002172 (PRINTS); IPR002172 (SMART); IPR002172 (G3DSA:4.10.400.GENE3D); IPR002172 (PFAM); IPR002172 (G3DSA:4.10.400.GENE3D); PTHR10529:SF205 (PANTHER); PTHR10529 (PANTHER); IPR023415 (PROSITE_PATTERNS); IPR023415 (PROSITE_PATTERNS); IPR002172 (PROSITE_PROFILES); IPR002172 (PROSITE_PROFILES); IPR002172 (SUPERFAMILY); IPR002172 (SUPERFAMILY)                                                                                                                                           |

|     |                                    |        |                                                                      |     |          |        |         |                                                                                                                                                                                                                                                                                                                                                                                 |
|-----|------------------------------------|--------|----------------------------------------------------------------------|-----|----------|--------|---------|---------------------------------------------------------------------------------------------------------------------------------------------------------------------------------------------------------------------------------------------------------------------------------------------------------------------------------------------------------------------------------|
| 459 | 337188_length_447_cvg_2.0_tip_1_5  | 4      | retinol dehydrogenase 13-like                                        | 149 | 1.02E-44 | 75.10% | 0.243   | IPR016040 (G3DSA:3.40.50.GENE3D); IPR002198 (PFAM); PTHR24316:SF305 (PANTHER); PTHR24316 (PANTHER); NON_CYTOPLASMIC_DOMAIN (PHOBIUS); TRANSMEMBRANE (PHOBIUS); CYTOPLASMIC_DOMAIN (PHOBIUS); SSF51735 (SUPERFAMILY); TMhelix (TMHMM)                                                                                                                                            |
| 460 | 337236_length_447_cvg_7.3_tip_0_1  | 4      | low quality protein: otogelin                                        | 149 | 8.75E-08 | 49.00% | 0.104   | no IPS match                                                                                                                                                                                                                                                                                                                                                                    |
| 461 | 337516_length_448_cvg_8.0_tip_1_1  | 3      | dehydrogenase reductase sdr family member 11-like                    | 149 | 4.17E-14 | 86.50% | 0.224   | IPR016040 (G3DSA:3.40.50.GENE3D); PTHR24322 (PANTHER); PTHR24322:SF310 (PANTHER); SSF51735 (SUPERFAMILY)                                                                                                                                                                                                                                                                        |
| 462 | 337528_length_448_cvg_2.0_tip_1_4  | 4      | basement membrane-specific heparan sulfate proteoglycan core protein | 149 | 1.34E-16 | 64.00% | 0.14    | IPR000742 (PFAM); G3DSA:2.10.25.10 (GENE3D); TRANSMEMBRANE (PHOBIUS); CYTOPLASMIC_DOMAIN (PHOBIUS); NON_CYTOPLASMIC_DOMAIN (PHOBIUS); IPR000742 (PROSITE_PROFILES); SSF57196 (SUPERFAMILY); TMhelix (TMHMM)                                                                                                                                                                     |
| 463 | 337658_length_448_cvg_89.7_tip_0_5 | 18805  | low quality protein: probable chitinase 3                            | 149 | 2.04E-35 | 71.30% | 0.579 Y | IPR001223 (PFAM); IPR013781 (G3DSA:3.20.20.GENE3D); PTHR11177:SF112 (PANTHER); PTHR11177 (PANTHER); NON_CYTOPLASMIC_DOMAIN (PHOBIUS); SIGNAL_PEPTIDE_H_REGION (PHOBIUS); SIGNAL_PEPTIDE_C_REGION (PHOBIUS); SIGNAL_PEPTIDE_N_REGION (PHOBIUS); SIGNAL_PEPTIDE (PHOBIUS); SignalP-TM (SIGNALP_GRAM_POSITIVE); SignalP-TM (SIGNALP_EUK); IPR017853 (SUPERFAMILY); TMhelix (TMHMM) |
| 464 | 338374_length_450_cvg_2.0_tip_1_0  | 2      | calnexin isoform x2                                                  | 150 | 1.35E-69 | 83.90% | 0.106   | IPR001580 (PRINTS); IPR009033 (G3DSA:2.10.250.GENE3D); IPR001580 (PFAM); IPR001580 (PANTHER); IPR018124 (PROSITE_PATTERNS); IPR018124 (PROSITE_PATTERNS); IPR018124 (PROSITE_PATTERNS); IPR009033 (SUPERFAMILY)                                                                                                                                                                 |
| 466 | 338802_length_451_cvg_2.0_tip_1_4  | 3      | lachesin                                                             | 150 | 1.12E-50 | 73.20% | 0.104   | IPR003599 (SMART); IPR013783 (G3DSA:2.60.40.GENE3D); IPR013106 (PFAM); IPR013783 (G3DSA:2.60.40.GENE3D); PTHR19831 (PANTHER); PTHR19831:SF43 (PANTHER); IPR007110 (PROSITE_PROFILES); SSF48726 (SUPERFAMILY); SSF48726 (SUPERFAMILY)                                                                                                                                            |
| 468 | 338966_length_452_cvg_4.9_tip_1_5  | 5      | alcohol dehydrogenase                                                | 150 | 3.60E-31 | 74.80% | 0.106   | IPR023210 (PFAM); IPR023210 (G3DSA:3.20.20.GENE3D); IPR001395 (PANTHER); PTHR11732:SF183 (PANTHER); IPR018170 (PROSITE_PATTERNS); IPR023210 (SUPERFAMILY)                                                                                                                                                                                                                       |
| 469 | 339140_length_452_cvg_82.0_tip_0_5 | 658959 | probable chitinase 3                                                 | 150 | 3.25E-32 | 69.20% | 0.317   | IPR013781 (G3DSA:3.20.20.GENE3D); IPR001223 (PFAM); PTHR11177:SF112 (PANTHER); PTHR11177 (PANTHER); SIGNAL_PEPTIDE_N_REGION (PHOBIUS); SIGNAL_PEPTIDE (PHOBIUS); SIGNAL_PEPTIDE_H_REGION (PHOBIUS); SIGNAL_PEPTIDE_C_REGION (PHOBIUS); NON_CYTOPLASMIC_DOMAIN (PHOBIUS); IPR017853 (SUPERFAMILY); TMhelix (TMHMM)                                                               |
| 507 | 349207_length_478_cvg_3.0_tip_1_1  | 4      | serine protease 52-like                                              | 150 | 2.03E-12 | 58.70% | 0.212   | G3DSA:2.40.10.10 (GENE3D); IPR001254 (PFAM); PTHR24260 (PANTHER); IPR018114 (PROSITE_PATTERNS); IPR001254 (PROSITE_PROFILES); IPR009003 (SUPERFAMILY)                                                                                                                                                                                                                           |
| 467 | 338874_length_452_cvg_61.8_tip_1_0 | 43     | agap012894-pa-like protein                                           | 151 | 5.72E-48 | 95.80% | 0.113   | IPR000558 (PRINTS); IPR000558 (SMART); IPR009072 (G3DSA:1.10.20.GENE3D); IPR007125 (PFAM); IPR000558 (PANTHER); IPR000558 (PROSITE_PATTERNS); IPR009072 (SUPERFAMILY)                                                                                                                                                                                                           |
| 470 | 339174_length_452_cvg_3.1_tip_1_1  | 4      | 14-3-3 protein                                                       | 151 | 8.81E-31 | 90.20% | 0.104   | Coil (COILS); IPR000308 (PRINTS); G3DSA:1.20.190.20 (GENE3D); IPR023410 (PFAM); IPR000308 (PANTHER); TRANSMEMBRANE (PHOBIUS); NON_CYTOPLASMIC_DOMAIN (PHOBIUS); CYTOPLASMIC_DOMAIN (PHOBIUS); IPR023410 (SUPERFAMILY); TMhelix (TMHMM); TMhelix (TMHMM)                                                                                                                         |
| 471 | 339250_length_453_cvg_3.2_tip_1_4  | 4      | mite allergen der f 3-like                                           | 151 | 6.67E-08 | 47.60% | 0.14    | IPR001254 (PFAM); G3DSA:2.40.10.10 (GENE3D); PTHR24276 (PANTHER); IPR018114 (PROSITE_PATTERNS); IPR009003 (SUPERFAMILY)                                                                                                                                                                                                                                                         |
| 472 | 339364_length_453_cvg_76.4_tip_1_3 | 67906  | proclotting enzyme-like                                              | 151 | 2.07E-16 | 62.80% | 0.116   | G3DSA:2.40.10.10 (GENE3D); IPR001254 (PFAM); PTHR24275 (PANTHER); IPR018114 (PROSITE_PATTERNS); IPR001254 (PROSITE_PROFILES); IPR009003 (SUPERFAMILY)                                                                                                                                                                                                                           |
| 473 | 339382_length_453_cvg_2.0_tip_1_1  | 4      | 3-hydroxy acid dehydrogenase                                         | 151 | 4.96E-40 | 99.50% | 0.162   | IPR002198 (PFAM); IPR016040 (G3DSA:3.40.50.GENE3D); PTHR24322 (PANTHER); SSF51735 (SUPERFAMILY)                                                                                                                                                                                                                                                                                 |
| 474 | 339588_length_453_cvg_82.6_tip_1_3 | 34753  | proclotting enzyme-like                                              | 151 | 2.01E-17 | 64.80% | 0.119   | G3DSA:2.40.10.10 (GENE3D); IPR001254 (PFAM); PTHR24265 (PANTHER); IPR018114 (PROSITE_PATTERNS); IPR001254 (PROSITE_PROFILES); IPR009003 (SUPERFAMILY)                                                                                                                                                                                                                           |
| 475 | 339762_length_454_cvg_3.5_tip_1_1  | 2      | maguk p55 subfamily member 6 isoform x1                              | 151 | 6.31E-21 | 86.20% | 0.269   | IPR004172 (SMART); IPR014775 (PFAM); IPR004172 (PROSITE_PROFILES)                                                                                                                                                                                                                                                                                                               |
| 476 | 340068_length_455_cvg_5.5_tip_1_2  | 11     | transcription factor e4f1-like                                       | 151 | 1.32E-36 | 60.30% | 0.104   | IPR015880 (SMART); PF13912 (PFAM); IPR013087 (G3DSA:3.30.160.GENE3D); PF13465 (PFAM); IPR013087 (G3DSA:3.30.160.GENE3D); PTHR24409 (PANTHER); IPR007087 (PROSITE_PATTERNS); IPR007087 (PROSITE_PATTERNS); IPR007087 (PROSITE_PROFILES); IPR007087 (PROSITE_PROFILES); IPR007087 (PROSITE_PROFILES); SSF57667 (SUPERFAMILY); SSF57667 (SUPERFAMILY)                              |



|     |                                     |         |                                                                                     |     |          |        |       |                                                                                                                                                                                                                                                                                                                                                                                                                                                                                                                                     |
|-----|-------------------------------------|---------|-------------------------------------------------------------------------------------|-----|----------|--------|-------|-------------------------------------------------------------------------------------------------------------------------------------------------------------------------------------------------------------------------------------------------------------------------------------------------------------------------------------------------------------------------------------------------------------------------------------------------------------------------------------------------------------------------------------|
| 477 | 340320_length_455_cvg_5.0_tip_1_0   | 6       | low quality protein: dnaj homolog subfamily c member 10-like                        | 152 | 4.04E-17 | 70.40% | 0.162 | IPR013766 (PFAM); IPR012336 (G3DSA:3.40.30.GENE3D); PTHR24078:SF3 (PANTHER); PTHR24078 (PANTHER); IPR017937 (PROSITE_PATTERNS); CYTOPLASMIC_DOMAIN (PHOBIUS); TRANSMEMBRANE (PHOBIUS); NON_CYTOPLASMIC_DOMAIN (PHOBIUS); IPR012336 (SUPERFAMILY); TMhelix (TMHMM)                                                                                                                                                                                                                                                                   |
| 478 | 340492_length_456_cvg_2.0_tip_1_3   | 2       | multiple epidermal growth factor-like domains protein 8                             | 152 | 4.96E-33 | 66.70% | 0.121 | PTHR10574 (PANTHER); PTHR10574:SF3 (PANTHER); CYTOPLASMIC_DOMAIN (PHOBIUS); TRANSMEMBRANE (PHOBIUS); NON_CYTOPLASMIC_DOMAIN (PHOBIUS); TMhelix (TMHMM); TMhelix (TMHMM)                                                                                                                                                                                                                                                                                                                                                             |
| 479 | 340650_length_456_cvg_4.3_tip_1_5   | 6       | down syndrome cell adhesion molecule-like protein dscam2 isoform x5                 | 152 | 2.38E-59 | 68.80% | 0.11  | IPR013783 (G3DSA:2.60.40.GENE3D); IPR013783 (G3DSA:2.60.40.GENE3D); PF13895 (PFAM); PTHR10489:SF567 (PANTHER); PTHR10489 (PANTHER); IPR007110 (PROSITE_PROFILES); IPR007110 (PROSITE_PROFILES); SSF48726 (SUPERFAMILY); SSF48726 (SUPERFAMILY)                                                                                                                                                                                                                                                                                      |
| 568 | 368844_length_532_cvg_4.3_tip_1_5   | 6       | zinc finger protein 502                                                             | 152 | 1.29E-32 | 60.20% | 0.1   | IPR015880 (SMART); IPR013087 (G3DSA:3.30.160.GENE3D); IPR007087 (PFAM); IPR013087 (G3DSA:3.30.160.GENE3D); PF13465 (PFAM); IPR013087 (G3DSA:3.30.160.GENE3D); PTHR24409 (PANTHER); PTHR24409:SF13 (PANTHER); IPR007087 (PROSITE_PATTERNS); IPR007087 (PROSITE_PATTERNS); IPR007087 (PROSITE_PATTERNS); IPR007087 (PROSITE_PATTERNS); IPR007087 (PROSITE_PROFILES); IPR007087 (PROSITE_PROFILES); IPR007087 (PROSITE_PROFILES); IPR007087 (PROSITE_PROFILES); SSF57667 (SUPERFAMILY); SSF57667 (SUPERFAMILY); SSF57667 (SUPERFAMILY) |
| 480 | 341202_length_457_cvg_2.0_tip_1_3   | 3       | serine threonine-protein phosphatase 6 regulatory ankyrin repeat subunit a- partial | 153 | 1.40E-36 | 89.10% | 0.105 | IPR002110 (SMART); IPR020683 (G3DSA:1.25.40.GENE3D); IPR020683 (PFAM); PTHR24158:SF22 (PANTHER); PTHR24158 (PANTHER); IPR002110 (PROSITE_PROFILES); IPR020683 (PROSITE_PROFILES); IPR002110 (PROSITE_PROFILES); IPR020683 (SUPERFAMILY)                                                                                                                                                                                                                                                                                             |
| 481 | 341662_length_459_cvg_2.0_tip_1_4   | 2       | peripheral plasma membrane protein cask isoform x2                                  | 153 | 3.17E-93 | 94.60% | 0.102 | IPR001452 (SMART); G3DSA:2.30.30.40 (GENE3D); IPR011511 (PFAM); PTHR23122:SF7 (PANTHER); PTHR23122 (PANTHER); IPR001452 (PROSITE_PROFILES); IPR001452 (SUPERFAMILY)                                                                                                                                                                                                                                                                                                                                                                 |
| 482 | 341882_length_459_cvg_62.6_tip_1_4  | 422     | selenium-dependent glutathione peroxidase                                           | 153 | 2.12E-57 | 78.40% | 0.115 | IPR000889 (PRINTS); IPR000889 (PIRSF); IPR012336 (G3DSA:3.40.30.GENE3D); IPR000889 (PFAM); PTHR11592:SF21 (PANTHER); IPR000889 (PANTHER); IPR000889 (PROSITE_PROFILES); IPR012336 (SUPERFAMILY)                                                                                                                                                                                                                                                                                                                                     |
| 483 | 342038_length_460_cvg_5.3_tip_1_3   | 10      | uncharacterized aarf domain-containing protein kinase 1                             | 154 | 9.00E-26 | 70.40% | 0.135 | PTHR10566:SF58 (PANTHER); PTHR10566 (PANTHER)                                                                                                                                                                                                                                                                                                                                                                                                                                                                                       |
| 484 | 342814_length_462_cvg_2.0_tip_1_1   | 3       | apical endosomal glycoprotein                                                       | 154 | 2.44E-19 | 68.60% | 0.11  | IPR000998 (PFAM); PTHR23282 (PANTHER); IPR000998 (PROSITE_PROFILES); IPR013320 (SUPERFAMILY)                                                                                                                                                                                                                                                                                                                                                                                                                                        |
| 485 | 342928_length_462_cvg_3.0_tip_1_4   | 4       | hypothetical protein MDA_GLEAN10014894                                              | 154 | 7.37E-08 | 45.75% | 0.12  | no IPS match                                                                                                                                                                                                                                                                                                                                                                                                                                                                                                                        |
| 486 | 343018_length_462_cvg_2.5_tip_1_3   | 3       | PREDICTED: hypothetical protein LOC100647042                                        | 154 | 9.20E-18 | 52.70% | 0.233 | IPR001314 (PRINTS); IPR001254 (SMART); G3DSA:2.40.10.10 (GENE3D); G3DSA:2.40.10.10 (GENE3D); IPR001254 (PFAM); PTHR24258:SF96 (PANTHER); PTHR24258 (PANTHER); IPR018114 (PROSITE_PATTERNS); IPR001254 (PROSITE_PROFILES); IPR009003 (SUPERFAMILY)                                                                                                                                                                                                                                                                                   |
| 487 | 343032_length_462_cvg_2.1_tip_1_4   | 4       | titin isoform x3                                                                    | 154 | 1.56E-31 | 63.60% | 0.1   | IPR003599 (SMART); IPR003598 (SMART); IPR013098 (PFAM); IPR013783 (G3DSA:2.60.40.GENE3D); PTHR19897 (PANTHER); IPR007110 (PROSITE_PROFILES); SSF48726 (SUPERFAMILY)                                                                                                                                                                                                                                                                                                                                                                 |
| 488 | 343066_length_462_cvg_106.9_tip_1_0 | 30526   | chondroitin proteoglycan partial                                                    | 154 | 7.25E-15 | 58.80% | 0.1   | IPR002557 (SMART); IPR002557 (G3DSA:2.170.140.GENE3D); IPR002557 (PFAM); PTHR23301 (PANTHER); IPR002557 (PROSITE_PROFILES); IPR002557 (SUPERFAMILY)                                                                                                                                                                                                                                                                                                                                                                                 |
| 489 | 343076_length_462_cvg_4.8_tip_1_0   | 5       | zinc finger protein                                                                 | 154 | 8.60E-29 | 55.60% | 0.11  | IPR015880 (SMART); PF13894 (PFAM); PF13465 (PFAM); IPR013087 (G3DSA:3.30.160.GENE3D); IPR013087 (G3DSA:3.30.160.GENE3D); IPR013087 (G3DSA:3.30.160.GENE3D); PTHR24409:SF14 (PANTHER); PTHR24409 (PANTHER); IPR007087 (PROSITE_PATTERNS); IPR007087 (PROSITE_PATTERNS); IPR007087 (PROSITE_PATTERNS); IPR007087 (PROSITE_PATTERNS); IPR007087 (PROSITE_PROFILES); IPR007087 (PROSITE_PROFILES); IPR007087 (PROSITE_PROFILES); SSF57667 (SUPERFAMILY); SSF57667 (SUPERFAMILY)                                                         |
| 490 | 343138_length_462_cvg_2.9_tip_1_0   | 6       | lipase 3-like                                                                       | 154 | 3.20E-45 | 72.00% | 0.183 | IPR029058 (G3DSA:3.40.50.GENE3D); PTHR11005 (PANTHER); PTHR11005:SF6 (PANTHER); IPR029058 (SUPERFAMILY)                                                                                                                                                                                                                                                                                                                                                                                                                             |
| 491 | 343498_length_463_cvg_63.7_tip_0_5  | 1043398 | chitinase partial                                                                   | 154 | 2.74E-40 | 63.00% | 0.101 | IPR011583 (SMART); IPR013781 (G3DSA:3.20.20.GENE3D); IPR001223 (PFAM); PTHR11177 (PANTHER); PTHR11177:SF112 (PANTHER); IPR001579 (PROSITE_PATTERNS); IPR017853 (SUPERFAMILY)                                                                                                                                                                                                                                                                                                                                                        |
| 516 | 351721_length_484_cvg_2.0_tip_1_4   | 5       | leucine-rich repeat protein soc-2 isoform x1                                        | 154 | 8.82E-64 | 82.50% | 0.119 | G3DSA:3.80.10.10 (GENE3D); IPR001611 (PFAM); PTHR16083 (PANTHER); PTHR16083:SF2 (PANTHER); SSF52075 (SUPERFAMILY)                                                                                                                                                                                                                                                                                                                                                                                                                   |
| 492 | 343990_length_464_cvg_63.0_tip_0_4  | 401     | uncharacterized oxidoreductase                                                      | 155 | 8.03E-28 | 72.30% | 0.133 | IPR016040 (G3DSA:3.40.50.GENE3D); PTHR24322:SF237 (PANTHER); PTHR24322 (PANTHER); SSF51735 (SUPERFAMILY)                                                                                                                                                                                                                                                                                                                                                                                                                            |

|     |                                    |        |                                                                                                                                                                            |     |           |        |         |                                                                                                                                                                                                                                                                                                                                                                                                                                                                                                                                               |
|-----|------------------------------------|--------|----------------------------------------------------------------------------------------------------------------------------------------------------------------------------|-----|-----------|--------|---------|-----------------------------------------------------------------------------------------------------------------------------------------------------------------------------------------------------------------------------------------------------------------------------------------------------------------------------------------------------------------------------------------------------------------------------------------------------------------------------------------------------------------------------------------------|
| 512 | 350945_length_482_cvg_2.6_tip_1_2  | 5      | odorant-binding protein 4                                                                                                                                                  | 155 | 1.25E-44  | 72.00% | 0.101   | IPR006170 (PRINTS); IPR006170 (SMART); IPR023316 (G3DSA:1.10.238.GENE3D); IPR006170 (PFAM); PTHR11857 (PANTHER); PTHR11857:SF4 (PANTHER); CYTOPLASMIC_DOMAIN (PHOBIUS); TRANSMEMBRANE (PHOBIUS); NON_CYTOPLASMIC_DOMAIN (PHOBIUS); TRANSMEMBRANE (PHOBIUS); CYTOPLASMIC_DOMAIN (PHOBIUS); IPR023316 (SUPERFAMILY); TMhelix (TMHMM); TMhelix (TMHMM)                                                                                                                                                                                           |
| 493 | 344822_length_467_cvg_4.0_tip_1_4  | 6      | peptidase partial                                                                                                                                                          | 156 | 6.71E-06  | 70.50% | 0.241   | G3DSA:2.40.10.10 (GENE3D); IPR009003 (SUPERFAMILY)                                                                                                                                                                                                                                                                                                                                                                                                                                                                                            |
| 494 | 344840_length_467_cvg_9.1_tip_1_0  | 16     | ankyrin repeat domain-containing protein 32-like                                                                                                                           | 156 | 2.25E-25  | 57.50% | 0.162   | IPR002110 (SMART); IPR020683 (PFAM); IPR002110 (PFAM); IPR020683 (G3DSA:1.25.40.GENE3D); PTHR24171 (PANTHER); IPR020683 (PROSITE_PROFILES); IPR002110 (PROSITE_PROFILES); IPR020683 (SUPERFAMILY)                                                                                                                                                                                                                                                                                                                                             |
| 495 | 345792_length_469_cvg_2.4_tip_1_3  | 7      | f379 retina specific protein                                                                                                                                               | 157 | 1.12E-08  | 70.00% | 0.187   | PR02045 (PRINTS); PTHR12138 (PANTHER)                                                                                                                                                                                                                                                                                                                                                                                                                                                                                                         |
| 496 | 345870_length_469_cvg_3.0_tip_1_3  | 7      | dna-specific endonuclease partial                                                                                                                                          | 157 | 2.68E-48  | 99.80% | 0.132   | IPR007346 (PFAM); SSF54060 (SUPERFAMILY)                                                                                                                                                                                                                                                                                                                                                                                                                                                                                                      |
| 497 | 346016_length_470_cvg_90.8_tip_0_0 | 126651 | low-density lipoprotein receptor-related protein 2                                                                                                                         | 157 | 3.19E-32  | 61.10% | 0.1     | IPR002172 (PRINTS); IPR002172 (SMART); IPR002172 (PFAM); IPR002172 (G3DSA:4.10.400.GENE3D); IPR002172 (G3DSA:4.10.400.GENE3D); IPR002172 (G3DSA:4.10.400.GENE3D); G3DSA:4.10.1220.10 (GENE3D); PTHR10529 (PANTHER); IPR023415 (PROSITE_PATTERNS); IPR023415 (PROSITE_PATTERNS); IPR023415 (PROSITE_PATTERNS); IPR023415 (PROSITE_PATTERNS); IPR002172 (PROSITE_PROFILES); IPR002172 (PROSITE_PROFILES); IPR002172 (PROSITE_PROFILES); IPR002172 (PROSITE_PROFILES); IPR002172 (SUPERFAMILY); IPR002172 (SUPERFAMILY); IPR002172 (SUPERFAMILY) |
| 498 | 346482_length_471_cvg_82.5_tip_1_3 | 1404   | transmembrane protease serine 9-like                                                                                                                                       | 157 | 2.31E-27  | 58.50% | 0.113   | IPR001254 (SMART); IPR001254 (PFAM); G3DSA:2.40.10.10 (GENE3D); PTHR24260 (PANTHER); IPR018114 (PROSITE_PATTERNS); IPR001254 (PROSITE_PROFILES); IPR009003 (SUPERFAMILY)                                                                                                                                                                                                                                                                                                                                                                      |
| 499 | 346786_length_472_cvg_3.7_tip_1_3  | 5      | upf0669 protein c6orf120 homolog                                                                                                                                           | 158 | 3.01E-23  | 63.00% | 0.494 Y | PTHR31703 (PANTHER); CYTOPLASMIC_DOMAIN (PHOBIUS); NON_CYTOPLASMIC_DOMAIN (PHOBIUS); TRANSMEMBRANE (PHOBIUS); SignalP-noTM (SIGNALP_EUK); TMhelix (TMHMM)                                                                                                                                                                                                                                                                                                                                                                                     |
| 500 | 347108_length_473_cvg_2.0_tip_1_0  | 4      | acid sphingomyelinase-like phosphodiesterase partial                                                                                                                       | 158 | 3.36E-14  | 54.60% | 0.101   | PTHR10340 (PANTHER)                                                                                                                                                                                                                                                                                                                                                                                                                                                                                                                           |
| 501 | 347640_length_474_cvg_2.0_tip_1_3  | 3      | serine protease snake                                                                                                                                                      | 158 | 1.53E-39  | 58.20% | 0.149   | IPR001314 (PRINTS); IPR001254 (SMART); G3DSA:2.40.10.10 (GENE3D); G3DSA:2.40.10.10 (GENE3D); IPR001254 (PFAM); PTHR24260 (PANTHER); IPR018114 (PROSITE_PATTERNS); IPR001254 (PROSITE_PROFILES); IPR009003 (SUPERFAMILY)                                                                                                                                                                                                                                                                                                                       |
| 502 | 347978_length_475_cvg_65.4_tip_1_4 | 108    | peptidyl-prolyl cis-trans isomerase-like 1                                                                                                                                 | 158 | 1.12E-21  | 91.90% | 0.115   | IPR029000 (G3DSA:2.40.100.GENE3D); IPR002130 (PFAM); IPR024936 (PANTHER); IPR002130 (PROSITE_PROFILES); IPR029000 (SUPERFAMILY)                                                                                                                                                                                                                                                                                                                                                                                                               |
| 503 | 348527_length_476_cvg_4.0_tip_1_5  | 4      | upf0364 protein c6orf211 homolog                                                                                                                                           | 158 | 4.43E-28  | 60.30% | 0.103   | IPR002791 (PFAM); PTHR12260:SF1 (PANTHER); PTHR12260 (PANTHER); IPR002791 (SUPERFAMILY)                                                                                                                                                                                                                                                                                                                                                                                                                                                       |
| 504 | 348861_length_477_cvg_51.0_tip_1_2 | 87     | bursicon alpha                                                                                                                                                             | 159 | 4.24E-61  | 85.80% | 0.607 Y | IPR004133 (PFAM); PTHR11339 (PANTHER); SIGNAL_PEPTIDE (PHOBIUS); SIGNAL_PEPTIDE_N_REGION (PHOBIUS); NON_CYTOPLASMIC_DOMAIN (PHOBIUS); SIGNAL_PEPTIDE_H_REGION (PHOBIUS); SIGNAL_PEPTIDE_C_REGION (PHOBIUS); IPR006207 (PROSITE_PROFILES); SignalP-noTM (SIGNALP_EUK)                                                                                                                                                                                                                                                                          |
| 505 | 348889_length_477_cvg_4.0_tip_1_3  | 5      | calcium calmodulin-dependent protein kinase                                                                                                                                | 159 | 6.57E-94  | 92.10% | 0.101   | IPR008145 (SMART); IPR027417 (G3DSA:3.40.50.GENE3D); G3DSA:3.30.63.10 (GENE3D); IPR008145 (PFAM); PTHR23122:SF7 (PANTHER); PTHR23122 (PANTHER); IPR020590 (PROSITE_PATTERNS); IPR008144 (PROSITE_PROFILES); IPR027417 (SUPERFAMILY)                                                                                                                                                                                                                                                                                                           |
| 506 | 348917_length_477_cvg_5.2_tip_1_5  | 7      | glutamine-rich protein 2                                                                                                                                                   | 159 | 1.62E-10  | 48.00% | 0.197   | SignalP-TM (SIGNALP_GRAM_POSITIVE)                                                                                                                                                                                                                                                                                                                                                                                                                                                                                                            |
| 508 | 349643_length_479_cvg_3.4_tip_1_2  | 5      | zinc finger protein 271 (zinc finger protein 7) (zinc finger protein znfphe133) (epstein-barr virus-induced zinc finger protein) (znf-eb) (ct-zfp48) (zinc finger protein) | 159 | 2.82E-23  | 59.50% | 0.097   | IPR015880 (SMART); IPR013087 (G3DSA:3.30.160.GENE3D); PF13465 (PFAM); IPR003656 (PFAM); IPR013087 (G3DSA:3.30.160.GENE3D); PTHR24409 (PANTHER); PTHR24409:SF14 (PANTHER); IPR007087 (PROSITE_PATTERNS); IPR007087 (PROSITE_PATTERNS); IPR007087 (PROSITE_PATTERNS); IPR007087 (PROSITE_PATTERNS); IPR007087 (PROSITE_PROFILES); IPR007087 (PROSITE_PROFILES); IPR007087 (PROSITE_PROFILES); IPR007087 (PROSITE_PROFILES); SSF57667 (SUPERFAMILY); SSF57667 (SUPERFAMILY)                                                                      |
| 509 | 350293_length_481_cvg_4.1_tip_1_1  | 6      | adam 17-like protease                                                                                                                                                      | 160 | 1.60E-56  | 73.80% | 0.663 Y | IPR002870 (PFAM); PTHR11905 (PANTHER); PTHR11905:SF121 (PANTHER); SIGNAL_PEPTIDE_C_REGION (PHOBIUS); SIGNAL_PEPTIDE (PHOBIUS); NON_CYTOPLASMIC_DOMAIN (PHOBIUS); SIGNAL_PEPTIDE_N_REGION (PHOBIUS); SIGNAL_PEPTIDE_H_REGION (PHOBIUS); SignalP-noTM (SIGNALP_EUK)                                                                                                                                                                                                                                                                             |
| 510 | 350301_length_481_cvg_45.9_tip_1_2 | 84     | maguk p55 subfamily member 6 isoform x1                                                                                                                                    | 160 | 9.46E-21  | 88.00% | 0.099   | IPR027417 (G3DSA:3.40.50.GENE3D); PTHR23122 (PANTHER); IPR008144 (PROSITE_PROFILES); IPR027417 (SUPERFAMILY)                                                                                                                                                                                                                                                                                                                                                                                                                                  |
| 511 | 350393_length_481_cvg_2.0_tip_1_4  | 3      | transcriptional regulator partial                                                                                                                                          | 160 | 7.47E-112 | 99.90% | 0.188   | no IPS match                                                                                                                                                                                                                                                                                                                                                                                                                                                                                                                                  |



|     |                                    |       |                                                     |     |           |         |         |                                                                                                                                                                                                                                                                                                                                                                                                                                                                                                                                                                                                                               |
|-----|------------------------------------|-------|-----------------------------------------------------|-----|-----------|---------|---------|-------------------------------------------------------------------------------------------------------------------------------------------------------------------------------------------------------------------------------------------------------------------------------------------------------------------------------------------------------------------------------------------------------------------------------------------------------------------------------------------------------------------------------------------------------------------------------------------------------------------------------|
| 513 | 351333_length_483_cvg_3.0_tip_0_4  | 2     | heat shock 70 kda protein 14                        | 161 | 2.46E-38  | 65.30%  | 0.128   | IPR013126 (PRINTS); G3DSA:3.30.30.30 (GENE3D); IPR013126 (PFAM); G3DSA:3.30.420.40 (GENE3D); PTHR19375:SF158 (PANTHER); PTHR19375 (PANTHER); SSF53067 (SUPERFAMILY)                                                                                                                                                                                                                                                                                                                                                                                                                                                           |
| 514 | 351351_length_483_cvg_2.7_tip_1_5  | 5     | peptidyl-prolyl cis-trans isomerase a               | 161 | 1.20E-81  | 100.00% | 0.109   | IPR029000 (G3DSA:2.40.100.GENE3D); IPR002130 (PFAM); PTHR11071:SF195 (PANTHER); IPR024936 (PANTHER); IPR002130 (PROSITE_PROFILES); IPR029000 (SUPERFAMILY)                                                                                                                                                                                                                                                                                                                                                                                                                                                                    |
| 515 | 351653_length_484_cvg_67.9_tip_1_0 | 1559  | chitinase 2                                         | 162 | 5.57E-42  | 74.40%  | 0.336   | IPR001223 (PFAM); IPR013781 (G3DSA:3.20.20.GENE3D); PTHR11177 (PANTHER); PTHR11177:SF112 (PANTHER); SIGNAL_PEPTIDE_H_REGION (PHOBIUS); SIGNAL_PEPTIDE_N_REGION (PHOBIUS); SIGNAL_PEPTIDE_C_REGION (PHOBIUS); NON_CYTOPLASMIC_DOMAIN (PHOBIUS); SIGNAL_PEPTIDE (PHOBIUS); IPR017853 (SUPERFAMILY); TMhelix (TMHMM)                                                                                                                                                                                                                                                                                                             |
| 518 | 352853_length_487_cvg_4.0_tip_1_4  | 10    | tyrosine-protein kinase transmembrane receptor ror2 | 162 | 7.78E-67  | 92.10%  | 0.115   | IPR001245 (PRINTS); IPR020635 (SMART); G3DSA:1.10.510.10 (GENE3D); IPR001245 (PFAM); PTHR24416:SF63 (PANTHER); PTHR24416 (PANTHER); TRANSMEMBRANE (PHOBIUS); TRANSMEMBRANE (PHOBIUS); NON_CYTOPLASMIC_DOMAIN (PHOBIUS); NON_CYTOPLASMIC_DOMAIN (PHOBIUS); CYTOPLASMIC_DOMAIN (PHOBIUS); IPR000719 (PROSITE_PROFILES); IPR011009 (SUPERFAMILY); TMhelix (TMHMM)                                                                                                                                                                                                                                                                |
| 519 | 353229_length_488_cvg_3.0_tip_1_2  | 5     | neutral ceramidase-like                             | 162 | 5.52E-59  | 70.70%  | 0.121   | IPR006823 (PFAM); PTHR12670:SF1 (PANTHER); IPR006823 (PANTHER)                                                                                                                                                                                                                                                                                                                                                                                                                                                                                                                                                                |
| 520 | 353415_length_489_cvg_3.0_tip_1_5  | 3     | protein fem-1 homolog cg6966 isoform x1             | 163 | 4.51E-71  | 88.70%  | 0.166   | IPR002110 (PRINTS); IPR002110 (SMART); IPR002110 (PFAM); IPR020683 (PFAM); IPR020683 (G3DSA:1.25.40.GENE3D); IPR020683 (G3DSA:1.25.40.GENE3D); PTHR24173 (PANTHER); PTHR24173:SF15 (PANTHER); IPR002110 (PROSITE_PROFILES); IPR002110 (PROSITE_PROFILES); IPR020683 (PROSITE_PROFILES); IPR020683 (SUPERFAMILY)                                                                                                                                                                                                                                                                                                               |
| 521 | 353849_length_490_cvg_63.0_tip_0_5 | 47563 | low-density lipoprotein receptor-related protein 5  | 163 | 6.72E-23  | 56.60%  | 0.885 Y | IPR002172 (PRINTS); IPR002172 (SMART); IPR002172 (PFAM); IPR002172 (G3DSA:4.10.400.GENE3D); IPR002172 (G3DSA:4.10.400.GENE3D); PTHR10529 (PANTHER); IPR023415 (PROSITE_PATTERNS); IPR023415 (PROSITE_PATTERNS); SIGNAL_PEPTIDE_H_REGION (PHOBIUS); SIGNAL_PEPTIDE_N_REGION (PHOBIUS); NON_CYTOPLASMIC_DOMAIN (PHOBIUS); SIGNAL_PEPTIDE (PHOBIUS); SIGNAL_PEPTIDE_C_REGION (PHOBIUS); IPR002172 (PROSITE_PROFILES); IPR002172 (PROSITE_PROFILES); IPR002172 (PROSITE_PROFILES); IPR002172 (PROSITE_PROFILES); SignalP-noTM (SIGNALP_EUK); SignalP-TM (SIGNALP_GRAM_POSITIVE); IPR002172 (SUPERFAMILY); IPR002172 (SUPERFAMILY) |
| 522 | 355275_length_494_cvg_30.0_tip_1_0 | 36    | polyubiquitin-b isoform x2                          | 165 | 1.34E-110 | 99.00%  | 0.103   | IPR019956 (PRINTS); IPR000626 (SMART); G3DSA:3.10.20.90 (GENE3D); G3DSA:3.10.20.90 (GENE3D); IPR000626 (PFAM); PTHR10666 (PANTHER); IPR019954 (PROSITE_PATTERNS); IPR019954 (PROSITE_PATTERNS); IPR000626 (PROSITE_PROFILES); IPR000626 (PROSITE_PROFILES); IPR000626 (PROSITE_PROFILES); IPR029071 (SUPERFAMILY); IPR029071 (SUPERFAMILY); IPR029071 (SUPERFAMILY)                                                                                                                                                                                                                                                           |
| 523 | 355307_length_494_cvg_5.6_tip_1_1  | 8     | peroxiredoxin 1                                     | 165 | 6.41E-60  | 91.90%  | 0.108   | IPR019479 (PFAM); IPR000866 (PFAM); IPR012336 (G3DSA:3.40.30.GENE3D); PTHR10681 (PANTHER); PTHR10681:SF101 (PANTHER); IPR012336 (SUPERFAMILY)                                                                                                                                                                                                                                                                                                                                                                                                                                                                                 |
| 524 | 356111_length_496_cvg_3.0_tip_1_4  | 3     | neuropeptide f                                      | 165 | 8.16E-08  | 65.80%  | 0.209   | IPR001955 (SMART); G3DSA:1.20.5.570 (GENE3D); IPR001955 (PFAM); CYTOPLASMIC_DOMAIN (PHOBIUS); NON_CYTOPLASMIC_DOMAIN (PHOBIUS); TRANSMEMBRANE (PHOBIUS); IPR001955 (PROSITE_PROFILES); TMhelix (TMHMM)                                                                                                                                                                                                                                                                                                                                                                                                                        |
| 525 | 356545_length_497_cvg_2.0_tip_1_3  | 5     | venom serine protease bi-vsp-like                   | 166 | 1.30E-45  | 68.40%  | 0.102   | IPR001314 (PRINTS); IPR001254 (SMART); G3DSA:2.40.10.10 (GENE3D); IPR001254 (PFAM); G3DSA:2.40.10.10 (GENE3D); PTHR24268:SF97 (PANTHER); PTHR24268 (PANTHER); IPR018114 (PROSITE_PATTERNS); IPR001254 (PROSITE_PROFILES); IPR009003 (SUPERFAMILY)                                                                                                                                                                                                                                                                                                                                                                             |
| 526 | 356687_length_497_cvg_2.9_tip_1_0  | 5     | 50-kda dystrophin-associated glycoprotein           | 166 | 4.86E-15  | 67.30%  | 0.117   | IPR013783 (G3DSA:2.60.40.GENE3D); IPR016186 (G3DSA:3.10.100.GENE3D); IPR008908 (PFAM); IPR008908 (PANTHER); PTHR10132:SF14 (PANTHER); IPR016187 (SUPERFAMILY)                                                                                                                                                                                                                                                                                                                                                                                                                                                                 |
| 527 | 357067_length_498_cvg_69.0_tip_1_0 | 244   | chymotrypsin-like elastase family member 2a         | 166 | 1.19E-13  | 55.60%  | 0.329   | G3DSA:2.40.10.10 (GENE3D); G3DSA:2.40.10.10 (GENE3D); IPR001254 (PFAM); PTHR24275:SF45 (PANTHER); PTHR24275 (PANTHER); IPR018114 (PROSITE_PATTERNS); NON_CYTOPLASMIC_DOMAIN (PHOBIUS); CYTOPLASMIC_DOMAIN (PHOBIUS); TRANSMEMBRANE (PHOBIUS); IPR001254 (PROSITE_PROFILES); IPR009003 (SUPERFAMILY); TMhelix (TMHMM)                                                                                                                                                                                                                                                                                                          |
| 528 | 357261_length_499_cvg_2.3_tip_1_4  | 4     | atp-dependent partial                               | 166 | 6.85E-113 | 99.90%  | 0.162   | G3DSA:1.10.8.60 (GENE3D); IPR003959 (PFAM); IPR027417 (G3DSA:3.40.50.GENE3D); PTHR23076:SF10 (PANTHER); PTHR23076 (PANTHER); IPR003960 (PROSITE_PATTERNS); IPR027417 (SUPERFAMILY)                                                                                                                                                                                                                                                                                                                                                                                                                                            |

|     |                                    |        |                                                                     |     |          |        |         |                                                                                                                                                                                                                                                                                                                                                                                                                                                                                                                                                                      |
|-----|------------------------------------|--------|---------------------------------------------------------------------|-----|----------|--------|---------|----------------------------------------------------------------------------------------------------------------------------------------------------------------------------------------------------------------------------------------------------------------------------------------------------------------------------------------------------------------------------------------------------------------------------------------------------------------------------------------------------------------------------------------------------------------------|
| 529 | 358282_length_502_cvg_63.0_tip_0_4 | 376    | inactive hydroxysteroid dehydrogenase-like protein 1                | 167 | 7.29E-68 | 78.40% | 0.104   | Coil (COILS); IPR002347 (PRINTS); IPR002198 (PRINTS); IPR016040 (G3DSA:3.40.50.GENE3D); IPR002198 (PFAM); PTHR24316:SF317 (PANTHER); PTHR24316 (PANTHER); IPR020904 (PROSITE_PATTERNS); SSF51735 (SUPERFAMILY)                                                                                                                                                                                                                                                                                                                                                       |
| 530 | 359418_length_505_cvg_5.3_tip_1_1  | 9      | 3-ketoacyl-acyl reductase                                           | 168 | 6.76E-86 | 99.20% | 0.12    | IPR002347 (PRINTS); IPR001227 (G3DSA:3.40.366.GENE3D); IPR016040 (G3DSA:3.40.50.GENE3D); IPR002198 (PFAM); PTHR24312 (PANTHER); PTHR24312:SF0 (PANTHER); IPR016035 (SUPERFAMILY); SSF51735 (SUPERFAMILY)                                                                                                                                                                                                                                                                                                                                                             |
| 531 | 359528_length_505_cvg_2.0_tip_1_5  | 5      | multiple epidermal growth factor-like domains protein 10 isoform x1 | 168 | 8.42E-34 | 69.00% | 0.109   | PR00011 (PRINTS); IPR002049 (SMART); G3DSA:2.170.300.10 (GENE3D); IPR013032 (PFAM); IPR002049 (PFAM); PTHR24035 (PANTHER); IPR013032 (PROSITE_PATTERNS); IPR013032 (PROSITE_PATTERNS)                                                                                                                                                                                                                                                                                                                                                                                |
| 534 | 359954_length_506_cvg_35.0_tip_0_2 | 66     | histone h1                                                          | 168 | 1.72E-40 | 76.70% | 0.15    | IPR005819 (PRINTS); IPR005818 (SMART); IPR011991 (G3DSA:1.10.10.GENE3D); IPR005818 (PFAM); PTHR11467 (PANTHER); IPR005818 (PROSITE_PROFILES); SSF46785 (SUPERFAMILY)                                                                                                                                                                                                                                                                                                                                                                                                 |
| 562 | 366934_length_526_cvg_2.7_tip_1_1  | 2      | dscam splice variant                                                | 168 | 1.13E-26 | 70.00% | 0.145   | IPR003598 (SMART); IPR013783 (G3DSA:2.60.40.GENE3D); PF13895 (PFAM); PTHR10489 (PANTHER); IPR007110 (PROSITE_PROFILES); SSF48726 (SUPERFAMILY)                                                                                                                                                                                                                                                                                                                                                                                                                       |
| 532 | 359746_length_506_cvg_2.0_tip_1_1  | 6      | mre11 meiotic recombination 11 homolog a (cerevisiae) isoform cra_b | 169 | 6.91E-21 | 72.40% | 0.146   | PTHR22878 (PANTHER)                                                                                                                                                                                                                                                                                                                                                                                                                                                                                                                                                  |
| 533 | 359746_length_506_cvg_2.0_tip_1_4  | 6      | 5 -nucleotidase domain containing isoform cra_d                     | 169 | 2.09E-23 | 67.00% | 0.201   | PF13900 (PFAM); PTHR16213 (PANTHER)                                                                                                                                                                                                                                                                                                                                                                                                                                                                                                                                  |
| 535 | 360270_length_507_cvg_2.0_tip_1_5  | 4      | zinc finger protein 530-like                                        | 169 | 5.75E-22 | 60.90% | 0.167   | IPR015880 (SMART); IPR013087 (G3DSA:3.30.160.GENE3D); PF13465 (PFAM); IPR007087 (PFAM); IPR013087 (G3DSA:3.30.160.GENE3D); PTHR24409 (PANTHER); IPR007087 (PROSITE_PATTERNS); IPR007087 (PROSITE_PATTERNS); IPR007087 (PROSITE_PROFILES); IPR007087 (PROSITE_PROFILES); SSF57667 (SUPERFAMILY); SSF57667 (SUPERFAMILY)                                                                                                                                                                                                                                               |
| 536 | 360526_length_508_cvg_7.9_tip_1_2  | 12     | mitochondrial import inner membrane translocase subunit tim8        | 169 | 2.92E-30 | 84.30% | 0.107   | IPR004217 (PFAM); IPR004217 (G3DSA:1.10.287.GENE3D); PTHR21535:SF25 (PANTHER); PTHR21535 (PANTHER); IPR004217 (SUPERFAMILY)                                                                                                                                                                                                                                                                                                                                                                                                                                          |
| 537 | 360562_length_508_cvg_2.0_tip_1_2  | 6      | glucosidase 2 subunit beta                                          | 169 | 2.70E-63 | 70.70% | 0.107   | Coil (COILS); PF13015 (PFAM); IPR009011 (G3DSA:2.70.130.GENE3D); IPR026874 (PTHR12630:PANTHER); PTHR12630 (PANTHER); IPR009011 (SUPERFAMILY)                                                                                                                                                                                                                                                                                                                                                                                                                         |
| 539 | 360628_length_508_cvg_2.5_tip_1_5  | 6      | dnaj homolog subfamily c member 25 homolog                          | 169 | 1.17E-63 | 81.20% | 0.269   | Coil (COILS); IPR001623 (PRINTS); IPR001623 (SMART); IPR001623 (G3DSA:1.10.287.GENE3D); IPR001623 (PFAM); PTHR24078:SF125 (PANTHER); PTHR24078 (PANTHER); IPR018253 (PROSITE_PATTERNS); NON_CYTOPLASMIC_DOMAIN (PHOBIUS); TRANSMEMBRANE (PHOBIUS); CYTOPLASMIC_DOMAIN (PHOBIUS); IPR001623 (PROSITE_PROFILES); IPR001623 (SUPERFAMILY); TMhelix (TMHMM)                                                                                                                                                                                                              |
| 538 | 360580_length_508_cvg_65.6_tip_1_0 | 245    | chitinase 10 precursor                                              | 170 | 4.80E-41 | 69.20% | 0.188   | IPR013781 (G3DSA:3.20.20.GENE3D); IPR001223 (PFAM); PTHR11177 (PANTHER); PTHR11177:SF112 (PANTHER); IPR017853 (SUPERFAMILY); TMhelix (TMHMM)                                                                                                                                                                                                                                                                                                                                                                                                                         |
| 540 | 361324_length_510_cvg_57.5_tip_1_0 | 276    | projectin short variant                                             | 170 | 1.49E-44 | 86.80% | 0.196   | IPR003598 (SMART); IPR013783 (G3DSA:2.60.40.GENE3D); IPR013098 (PFAM); PTHR19897 (PANTHER); PTHR19897:SF155 (PANTHER); IPR007110 (PROSITE_PROFILES); SSF48726 (SUPERFAMILY)                                                                                                                                                                                                                                                                                                                                                                                          |
| 541 | 361506_length_510_cvg_2.0_tip_1_2  | 3      | sp6-9 protein                                                       | 170 | 1.98E-57 | 84.80% | 0.159   | IPR015880 (SMART); PF13465 (PFAM); IPR013087 (G3DSA:3.30.160.GENE3D); IPR013087 (G3DSA:3.30.160.GENE3D); PTHR23223:SF134 (PANTHER); PTHR23223 (PANTHER); IPR007087 (PROSITE_PATTERNS); IPR007087 (PROSITE_PATTERNS); IPR007087 (PROSITE_PROFILES); IPR007087 (PROSITE_PROFILES); SSF57667 (SUPERFAMILY)                                                                                                                                                                                                                                                              |
| 542 | 361666_length_511_cvg_91.9_tip_1_2 | 123141 | low-density lipoprotein receptor-related protein 5                  | 170 | 1.03E-23 | 59.80% | 0.420 Y | IPR002172 (PRINTS); IPR002172 (SMART); IPR002172 (PFAM); IPR002172 (G3DSA:4.10.400.GENE3D); IPR002172 (G3DSA:4.10.400.GENE3D); IPR002172 (G3DSA:4.10.400.GENE3D); PTHR10529 (PANTHER); IPR023415 (PROSITE_PATTERNS); IPR023415 (PROSITE_PATTERNS); TRANSMEMBRANE (PHOBIUS); CYTOPLASMIC_DOMAIN (PHOBIUS); NON_CYTOPLASMIC_DOMAIN (PHOBIUS); IPR002172 (PROSITE_PROFILES); IPR002172 (PROSITE_PROFILES); IPR002172 (PROSITE_PROFILES); SignalP-TM (SIGNALP_GRAM_POSITIVE); IPR002172 (SUPERFAMILY); IPR002172 (SUPERFAMILY); IPR002172 (SUPERFAMILY); TMhelix (TMHMM) |
| 543 | 361682_length_511_cvg_63.9_tip_0_2 | 462    | gamma-glutamyl hydrolase-like                                       | 170 | 6.01E-48 | 72.40% | 0.342 Y | IPR011697 (PFAM); IPR029062 (G3DSA:3.40.50.GENE3D); PTHR11315:SF2 (PANTHER); IPR015527 (PANTHER); NON_CYTOPLASMIC_DOMAIN (PHOBIUS); TRANSMEMBRANE (PHOBIUS); CYTOPLASMIC_DOMAIN (PHOBIUS); IPR015527 (PROSITE_PROFILES); IPR029062 (SUPERFAMILY); TMhelix (TMHMM)                                                                                                                                                                                                                                                                                                    |
| 544 | 361778_length_511_cvg_2.0_tip_1_0  | 2      | serine threonine-protein kinase 17b-like                            | 171 | 4.78E-91 | 85.50% | 0.151   | IPR002290 (SMART); G3DSA:3.30.200.20 (GENE3D); IPR000719 (PFAM); G3DSA:1.10.510.10 (GENE3D); PTHR24342 (PANTHER); IPR008271 (PROSITE_PATTERNS); IPR000719 (PROSITE_PROFILES); IPR011009 (SUPERFAMILY)                                                                                                                                                                                                                                                                                                                                                                |

|     |                                    |      |                                                           |     |           |         |         |                                                                                                                                                                                                                                                                                                                                                                                                                                                      |
|-----|------------------------------------|------|-----------------------------------------------------------|-----|-----------|---------|---------|------------------------------------------------------------------------------------------------------------------------------------------------------------------------------------------------------------------------------------------------------------------------------------------------------------------------------------------------------------------------------------------------------------------------------------------------------|
| 545 | 361938_length_512_cvg_4.0_tip_1_0  | 6    | kunitz bovine pancreatic trypsin inhibitor domain protein | 171 | 2.46E-40  | 60.10%  | 0.106   | IPR002223 (PRINTS); IPR002223 (SMART); IPR002223 (G3DSA:4.10.410.GENE3D); IPR002223 (G3DSA:4.10.410.GENE3D); IPR002223 (PFAM); IPR002223 (G3DSA:4.10.410.GENE3D); PTHR10083 (PANTHER); IPR020901 (PROSITE_PATTERNS); IPR020901 (PROSITE_PATTERNS); IPR020901 (PROSITE_PATTERNS); IPR002223 (PROSITE_PROFILES); IPR002223 (PROSITE_PROFILES); IPR002223 (PROSITE_PROFILES); IPR002223 (SUPERFAMILY); IPR002223 (SUPERFAMILY); IPR002223 (SUPERFAMILY) |
| 546 | 362090_length_512_cvg_3.1_tip_1_0  | 8    | hemocyte protein-glutamine gamma-glutamyltransferase-like | 171 | 4.93E-25  | 63.90%  | 0.166   | IPR001102 (PFAM); IPR013783 (G3DSA:2.60.40.GENE3D); IPR023608 (PANTHER); PTHR11590:SF40 (PANTHER); IPR014756 (SUPERFAMILY)                                                                                                                                                                                                                                                                                                                           |
| 547 | 362276_length_513_cvg_2.9_tip_1_5  | 4    | von willebrand factor c and egf domain-containing protein | 171 | 1.03E-06  | 54.33%  | 0.107   | IPR001007 (SMART); G3DSA:2.10.70.10 (GENE3D); IPR001007 (PFAM); IPR001007 (PROSITE_PATTERNS); IPR001007 (PROSITE_PROFILES); SSF57603 (SUPERFAMILY)                                                                                                                                                                                                                                                                                                   |
| 548 | 362556_length_513_cvg_2.0_tip_1_3  | 5    | lipophorin receptor                                       | 171 | 2.71E-91  | 85.50%  | 0.11    | IPR000033 (SMART); IPR000033 (PFAM); IPR011042 (G3DSA:2.120.10.GENE3D); PTHR10529:SF208 (PANTHER); PTHR10529 (PANTHER); IPR000033 (PROSITE_PROFILES); IPR000033 (PROSITE_PROFILES); IPR000033 (PROSITE_PROFILES); IPR000033 (PROSITE_PROFILES); SSF63825 (SUPERFAMILY)                                                                                                                                                                               |
| 549 | 362778_length_514_cvg_37.6_tip_1_5 | 49   | vacuolar-sorting protein snf8-like                        | 171 | 2.97E-71  | 90.40%  | 0.142   | Coil (COILS); IPR007286 (PFAM); IPR011991 (G3DSA:1.10.10.GENE3D); IPR007286 (PANTHER); PTHR12806:SF0 (PANTHER); SSF46785 (SUPERFAMILY)                                                                                                                                                                                                                                                                                                               |
| 550 | 362968_length_515_cvg_3.4_tip_1_0  | 6    | protein cbg27381                                          | 172 | 7.67E-44  | 61.50%  | 0.099   | PF13358 (PFAM); PTHR23022:SF64 (PANTHER); PTHR23022 (PANTHER)                                                                                                                                                                                                                                                                                                                                                                                        |
| 551 | 362996_length_515_cvg_12.8_tip_1_0 | 21   | protein disulfide-isomerase a6                            | 172 | 2.13E-52  | 74.30%  | 0.680 Y | PR00421 (PRINTS); IPR012336 (G3DSA:3.40.30.GENE3D); IPR013766 (PFAM); IPR005788 (TIGRFAM); PTHR18929 (PANTHER); PTHR18929:SF38 (PANTHER); IPR017937 (PROSITE_PATTERNS); SIGNAL_PEPTIDE_N_REGION (PHOBIUS); NON_CYTOPLASMIC_DOMAIN (PHOBIUS); SIGNAL_PEPTIDE (PHOBIUS); SIGNAL_PEPTIDE_H_REGION (PHOBIUS); SIGNAL_PEPTIDE_C_REGION (PHOBIUS); IPR012336 (PROSITE_PROFILES); SignalIP-noTM (SIGNALP_EUK); IPR012336 (SUPERFAMILY); TMhelix (TMHMM)     |
| 552 | 363010_length_515_cvg_63.0_tip_0_0 | 173  | ---NA---                                                  | 172 |           |         | 0.103   | IPR008197 (PRINTS); IPR008197 (SMART); IPR008197 (PFAM); IPR008197 (G3DSA:4.10.75.GENE3D); IPR008197 (PROSITE_PROFILES); IPR008197 (PROSITE_PROFILES); IPR008197 (SUPERFAMILY)                                                                                                                                                                                                                                                                       |
| 553 | 363018_length_515_cvg_21.3_tip_0_3 | 40   | prophenoloxidase activating factor                        | 172 | 2.04E-57  | 69.10%  | 0.118   | IPR001314 (PRINTS); IPR001254 (SMART); G3DSA:2.40.10.10 (GENE3D); IPR001254 (PFAM); G3DSA:2.40.10.10 (GENE3D); G3DSA:2.40.10.10 (GENE3D); PTHR24268:SF95 (PANTHER); PTHR24268 (PANTHER); IPR018114 (PROSITE_PATTERNS); IPR001254 (PROSITE_PROFILES); IPR009003 (SUPERFAMILY)                                                                                                                                                                         |
| 554 | 363678_length_517_cvg_8.5_tip_1_1  | 11   | extracellular zinc metalloprotease                        | 172 | 1.37E-08  | 44.50%  | 0.103   | IPR011096 (PFAM); IPR025711 (PFAM)                                                                                                                                                                                                                                                                                                                                                                                                                   |
| 555 | 363782_length_517_cvg_48.9_tip_1_5 | 81   | serine protease                                           | 172 | 6.92E-09  | 64.90%  | 0.128   | IPR001254 (PFAM); G3DSA:2.40.10.10 (GENE3D); PTHR24268 (PANTHER); IPR009003 (SUPERFAMILY)                                                                                                                                                                                                                                                                                                                                                            |
| 587 | 373648_length_546_cvg_12.4_tip_1_3 | 27   | retinal dehydrogenase 1                                   | 172 | 2.14E-68  | 89.50%  | 0.101   | IPR015590 (PFAM); IPR016163 (G3DSA:3.40.309.GENE3D); PTHR11699:SF145 (PANTHER); PTHR11699 (PANTHER); IPR016161 (SUPERFAMILY)                                                                                                                                                                                                                                                                                                                         |
| 556 | 364314_length_518_cvg_3.0_tip_1_1  | 8    | penicillin-binding protein partial                        | 173 | 3.26E-116 | 99.50%  | 0.141   | IPR001264 (PFAM); G3DSA:1.10.3810.10 (GENE3D); PTHR32282:SF1 (PANTHER); PTHR32282 (PANTHER); IPR023346 (SUPERFAMILY)                                                                                                                                                                                                                                                                                                                                 |
| 557 | 364844_length_520_cvg_7.2_tip_1_0  | 6    | lpxtg-motif protein cell wall anchor domain protein       | 174 | 5.03E-11  | 49.10%  | 0.219   | no IPS match                                                                                                                                                                                                                                                                                                                                                                                                                                         |
| 558 | 365050_length_521_cvg_19.3_tip_1_0 | 32   | protein d2-like isoform x1                                | 174 | 6.90E-64  | 77.40%  | 0.168   | IPR008914 (G3DSA:3.90.280.GENE3D); IPR008914 (PFAM); PTHR11362 (PANTHER); IPR008914 (SUPERFAMILY)                                                                                                                                                                                                                                                                                                                                                    |
| 559 | 365084_length_521_cvg_64.3_tip_0_0 | 3120 | chitinase partial                                         | 174 | 7.87E-50  | 62.30%  | 0.107   | IPR011583 (SMART); IPR001223 (PFAM); IPR013781 (G3DSA:3.20.20.GENE3D); IPR029070 (G3DSA:3.10.50.GENE3D); PTHR11177 (PANTHER); PTHR11177:SF112 (PANTHER); IPR001579 (PROSITE_PATTERNS); IPR017853 (SUPERFAMILY); IPR029070 (SUPERFAMILY)                                                                                                                                                                                                              |
| 560 | 365278_length_521_cvg_93.5_tip_0_3 | 485  | chitinase partial                                         | 174 | 3.31E-50  | 61.20%  | 0.11    | IPR011583 (SMART); IPR029070 (G3DSA:3.10.50.GENE3D); IPR013781 (G3DSA:3.20.20.GENE3D); IPR001223 (PFAM); PTHR11177 (PANTHER); PTHR11177:SF112 (PANTHER); IPR001579 (PROSITE_PATTERNS); IPR029070 (SUPERFAMILY); IPR017853 (SUPERFAMILY)                                                                                                                                                                                                              |
| 561 | 366424_length_524_cvg_5.1_tip_1_5  | 10   | adp-ribosylation factor 1                                 | 174 | 4.72E-113 | 100.00% | 0.122   | IPR006689 (PRINTS); IPR024156 (SMART); IPR006687 (SMART); IPR005225 (TIGRFAM); IPR006689 (PFAM); IPR027417 (G3DSA:3.40.50.GENE3D); PTHR11711 (PANTHER); PTHR11711:SF104 (PANTHER); IPR024156 (PROSITE_PROFILES); IPR027417 (SUPERFAMILY)                                                                                                                                                                                                             |
| 571 | 370778_length_537_cvg_28.6_tip_1_2 | 48   | prohormone-1-like                                         | 174 | 4.86E-33  | 78.40%  | 0.113   | NON_CYTOPLASMIC_DOMAIN (PHOBIUS); CYTOPLASMIC_DOMAIN (PHOBIUS); TRANSMEMBRANE (PHOBIUS); TMhelix (TMHMM)                                                                                                                                                                                                                                                                                                                                             |
| 563 | 367302_length_527_cvg_11.8_tip_0_2 | 11   | heat shock cognate 71 kda protein                         | 175 | 6.35E-29  | 75.20%  | 0.104   | IPR029048 (G3DSA:1.20.1270.GENE3D); PTHR19375:SF142 (PANTHER); PTHR19375 (PANTHER); IPR029048 (SUPERFAMILY)                                                                                                                                                                                                                                                                                                                                          |





|     |                                    |       |                                                                      |     |           |         |       |                                                                                                                                                                                                                                                                                                                                    |
|-----|------------------------------------|-------|----------------------------------------------------------------------|-----|-----------|---------|-------|------------------------------------------------------------------------------------------------------------------------------------------------------------------------------------------------------------------------------------------------------------------------------------------------------------------------------------|
| 581 | 372778_length_543_cvg_2.3_tip_1_0  | 4     | upf0528 protein cg10038                                              | 181 | 2.16E-25  | 67.50%  | 0.114 | IPR029058 (G3DSA:3.40.50.GENE3D); PTHR21357:SF4 (PANTHER); PTHR21357 (PANTHER); IPR029058 (SUPERFAMILY)                                                                                                                                                                                                                            |
| 582 | 372808_length_543_cvg_2.0_tip_1_5  | 3     | zinc finger protein 678-like                                         | 181 | 4.74E-24  | 56.30%  | 0.14  | IPR015880 (SMART); IPR013087 (G3DSA:3.30.160.GENE3D); IPR013087 (G3DSA:3.30.160.GENE3D); PF13465 (PFAM); PTHR24409 (PANTHER); IPR007087 (PROSITE_PATTERNS); IPR007087 (PROSITE_PATTERNS); IPR007087 (PROSITE_PROFILES); IPR007087 (PROSITE_PROFILES); IPR007087 (PROSITE_PROFILES); SSF57667 (SUPERFAMILY); SSF57667 (SUPERFAMILY) |
| 620 | 381064_length_569_cvg_4.2_tip_1_4  | 10    | phosphoglycerate kinase                                              | 181 | 3.47E-66  | 92.40%  | 0.102 | IPR001576 (PRINTS); IPR015901 (G3DSA:3.40.50.GENE3D); IPR001576 (PFAM); PTHR11406:SF6 (PANTHER); IPR001576 (PANTHER); NON_CYTOPLASMIC_DOMAIN (PHOBIUS); TRANSMEMBRANE (PHOBIUS); CYTOPLASMIC_DOMAIN (PHOBIUS); IPR001576 (SUPERFAMILY); TMhelix (TMHMM)                                                                            |
| 583 | 373132_length_544_cvg_4.7_tip_1_3  | 0     | ---NA---                                                             | 182 |           |         | 0.222 | IPR013781 (G3DSA:3.20.20.GENE3D); IPR017853 (SUPERFAMILY)                                                                                                                                                                                                                                                                          |
| 584 | 373244_length_544_cvg_12.0_tip_1_3 | 18    | otogelin- partial                                                    | 182 | 6.97E-11  | 51.20%  | 0.101 | no IPS match                                                                                                                                                                                                                                                                                                                       |
| 585 | 373548_length_545_cvg_2.0_tip_1_1  | 4     | peptidyl-glycine alpha-amidating monooxygenase partial               | 182 | 1.61E-56  | 64.50%  | 0.307 | IPR000720 (PRINTS); PF03712 (PFAM); IPR014784 (G3DSA:2.60.120.GENE3D); PTHR10680 (PANTHER); PTHR10680:SF13 (PANTHER); IPR014783 (PROSITE_PATTERNS); IPR008977 (SUPERFAMILY)                                                                                                                                                        |
| 586 | 373602_length_546_cvg_4.5_tip_1_2  | 9     | pacifastin light chain                                               | 182 | 1.15E-16  | 50.10%  | 0.128 | IPR008037 (PFAM); NON_CYTOPLASMIC_DOMAIN (PHOBIUS); CYTOPLASMIC_DOMAIN (PHOBIUS); TRANSMEMBRANE (PHOBIUS); IPR020862 (PROSITE_PROFILES); IPR020862 (PROSITE_PROFILES); IPR020862 (PROSITE_PROFILES); IPR008037 (SUPERFAMILY); IPR008037 (SUPERFAMILY); TMhelix (TMHMM)                                                             |
| 588 | 373700_length_546_cvg_2.0_tip_1_2  | 2     | calcium calmodulin-dependent protein kinase kinase 1-like isoform x2 | 182 | 1.73E-41  | 93.90%  | 0.125 | IPR002290 (SMART); G3DSA:1.10.510.10 (GENE3D); IPR000719 (PFAM); PTHR24347:SF141 (PANTHER); IPR020636 (PANTHER); IPR008271 (PROSITE_PATTERNS); IPR000719 (PROSITE_PROFILES); IPR011009 (SUPERFAMILY)                                                                                                                               |
| 589 | 373730_length_546_cvg_2.0_tip_1_0  | 2     | hypothetical protein DAPPUDRAFT_240129                               | 182 | 3.27E-47  | 64.50%  | 0.132 | IPR019791 (PFAM); IPR019791 (G3DSA:1.10.640.GENE3D); PTHR11475 (PANTHER); IPR019791 (PROSITE_PROFILES); IPR010255 (SUPERFAMILY)                                                                                                                                                                                                    |
| 591 | 374124_length_547_cvg_4.4_tip_1_2  | 8     | dbh-like monooxygenase protein 1                                     | 182 | 2.49E-30  | 57.40%  | 0.108 | PF03712 (PFAM); IPR014784 (G3DSA:2.60.120.GENE3D); IPR000945 (PANTHER); IPR014783 (PROSITE_PATTERNS); IPR008977 (SUPERFAMILY)                                                                                                                                                                                                      |
| 592 | 374296_length_548_cvg_3.7_tip_1_2  | 13    | apolipoprotein li-ii precursor                                       | 182 | 3.59E-17  | 50.50%  | 0.099 | no IPS match                                                                                                                                                                                                                                                                                                                       |
| 590 | 374088_length_547_cvg_2.0_tip_1_0  | 3     | histone-lysine n-methyltransferase setmar isoform x2                 | 183 | 1.85E-63  | 69.30%  | 0.109 | IPR001888 (PFAM); IPR011991 (G3DSA:1.10.10.GENE3D); PTHR23016 (PANTHER); PTHR23016:SF3 (PANTHER)                                                                                                                                                                                                                                   |
| 593 | 374388_length_548_cvg_2.0_tip_1_3  | 6     | short chain dehydrogenase reductase family protein                   | 183 | 6.95E-132 | 100.00% | 0.111 | IPR002347 (PRINTS); IPR002198 (PFAM); IPR016040 (G3DSA:3.40.50.GENE3D); PTHR24322:SF68 (PANTHER); PTHR24322 (PANTHER); IPR020904 (PROSITE_PATTERNS); SSF51735 (SUPERFAMILY)                                                                                                                                                        |
| 594 | 374820_length_549_cvg_2.0_tip_1_3  | 3     | glycosyl hydrolases 31 family protein                                | 183 | 8.08E-130 | 100.00% | 0.1   | IPR000322 (PFAM); IPR025887 (PFAM); PTHR22762:SF38 (PANTHER); PTHR22762 (PANTHER); IPR017853 (SUPERFAMILY); IPR011013 (SUPERFAMILY)                                                                                                                                                                                                |
| 595 | 375008_length_550_cvg_66.0_tip_0_4 | 14274 | venom serine carboxypeptidase-like                                   | 183 | 4.42E-42  | 73.50%  | 0.195 | IPR001563 (PFAM); IPR029058 (G3DSA:3.40.50.GENE3D); IPR001563 (PANTHER); NON_CYTOPLASMIC_DOMAIN (PHOBIUS); CYTOPLASMIC_DOMAIN (PHOBIUS); TRANSMEMBRANE (PHOBIUS); IPR029058 (SUPERFAMILY); TMhelix (TMHMM)                                                                                                                         |
| 596 | 375256_length_551_cvg_4.6_tip_1_2  | 7     | myosin-binding protein fast-type-like                                | 183 | 1.03E-37  | 65.00%  | 0.102 | IPR003598 (SMART); IPR003599 (SMART); IPR013098 (PFAM); IPR013783 (G3DSA:2.60.40.GENE3D); IPR020675 (PANTHER); IPR007110 (PROSITE_PROFILES); SSF48726 (SUPERFAMILY)                                                                                                                                                                |
| 597 | 375474_length_551_cvg_2.0_tip_1_3  | 9     | membrane metallo-endopeptidase-like 1 isoform x2                     | 184 | 2.18E-76  | 80.10%  | 0.125 | IPR008753 (PFAM); IPR024079 (G3DSA:3.40.390.GENE3D); PTHR11733:SF113 (PANTHER); IPR000718 (PANTHER); SSF55486 (SUPERFAMILY)                                                                                                                                                                                                        |
| 653 | 390544_length_601_cvg_62.6_tip_1_0 | 573   | complement component 1 q subcomponent-binding mitochondrial          | 184 | 8.76E-11  | 78.90%  | 0.105 | IPR003428 (PFAM); IPR003428 (G3DSA:3.10.280.GENE3D); PTHR10826 (PANTHER); PTHR10826:SF1 (PANTHER); IPR003428 (SUPERFAMILY)                                                                                                                                                                                                         |
| 600 | 376886_length_556_cvg_6.1_tip_1_1  | 13    | anti-lipopolysaccharide partial                                      | 185 | 1.63E-19  | 66.10%  | 0.104 | IPR024509 (PFAM); CYTOPLASMIC_DOMAIN (PHOBIUS); NON_CYTOPLASMIC_DOMAIN (PHOBIUS); TRANSMEMBRANE (PHOBIUS); IPR024716 (PRODOM); TMhelix (TMHMM)                                                                                                                                                                                     |
| 599 | 376866_length_556_cvg_5.5_tip_1_0  | 9     | peroxisome biogenesis factor 10                                      | 186 | 2.76E-33  | 61.00%  | 0.127 | IPR001841 (SMART); IPR013083 (G3DSA:3.30.40.GENE3D); PF13923 (PFAM); IPR025654 (PANTHER); IPR017907 (PROSITE_PATTERNS); CYTOPLASMIC_DOMAIN (PHOBIUS); TRANSMEMBRANE (PHOBIUS); NON_CYTOPLASMIC_DOMAIN (PHOBIUS); IPR001841 (PROSITE_PROFILES); SSF57850 (SUPERFAMILY)                                                              |
| 601 | 377980_length_559_cvg_2.0_tip_1_2  | 3     | glucose-6-phosphate partial                                          | 186 | 3.85E-114 | 100.00% | 0.11  | IPR001672 (PRINTS); IPR023096 (G3DSA:1.10.1390.GENE3D); G3DSA:3.40.50.10490 (GENE3D); IPR001672 (PFAM); PTHR11469:SF7 (PANTHER); IPR001672 (PANTHER); IPR018189 (PROSITE_PATTERNS); IPR001672 (PROSITE_PROFILES); SSF53697 (SUPERFAMILY)                                                                                           |

|     |                                    |       |                                                                |     |          |        |         |                                                                                                                                                                                                                                                                                                                                                                                                                                                                                    |
|-----|------------------------------------|-------|----------------------------------------------------------------|-----|----------|--------|---------|------------------------------------------------------------------------------------------------------------------------------------------------------------------------------------------------------------------------------------------------------------------------------------------------------------------------------------------------------------------------------------------------------------------------------------------------------------------------------------|
| 603 | 378174_length_560_cvg_4.9_tip_1_5  | 6     | fibroblast growth factor receptor-like 1                       | 186 | 9.10E-27 | 64.00% | 0.115   | IPR003599 (SMART); IPR003598 (SMART); IPR013783 (G3DSA:2.60.40.GENE3D); IPR013098 (PFAM); PTHR19890 (PANTHER); PTHR19890:SF5 (PANTHER); IPR007110 (PROSITE_PROFILES); SSF48726 (SUPERFAMILY)                                                                                                                                                                                                                                                                                       |
| 605 | 378428_length_560_cvg_3.0_tip_1_5  | 7     | membrane metallo-endopeptidase-like 1                          | 186 | 2.78E-22 | 86.20% | 0.188   | SSF55486 (SUPERFAMILY)                                                                                                                                                                                                                                                                                                                                                                                                                                                             |
| 635 | 386754_length_588_cvg_57.6_tip_1_2 | 115   | zinc finger protein zpr1                                       | 186 | 3.91E-73 | 80.30% | 0.11    | IPR004457 (SMART); IPR004457 (TIGRFAM); IPR004457 (PFAM); PTHR10876 (PANTHER); PTHR10876:SF0 (PANTHER)                                                                                                                                                                                                                                                                                                                                                                             |
| 602 | 378084_length_559_cvg_3.1_tip_1_3  | 6     | hypothetical protein LOTGIDRAFT_201948                         | 187 | 1.13E-71 | 74.30% | 0.145   | IPR007122 (PRINTS); IPR007122 (SMART); IPR029006 (G3DSA:3.40.20.GENE3D); IPR007123 (PFAM); IPR029006 (G3DSA:3.40.20.GENE3D); IPR015628 (PTHR11977:PANTHER); IPR007122 (PANTHER); SSF55753 (SUPERFAMILY); SSF55753 (SUPERFAMILY)                                                                                                                                                                                                                                                    |
| 606 | 378535_length_561_cvg_17.8_tip_1_4 | 29    | calponin transgelin                                            | 187 | 1.70E-74 | 89.10% | 0.347 Y | IPR001997 (PRINTS); IPR003096 (PRINTS); IPR001715 (SMART); IPR001715 (PFAM); IPR001715 (G3DSA:1.10.418.GENE3D); PTHR18959:SF51 (PANTHER); PTHR18959 (PANTHER); IPR001715 (PROSITE_PROFILES); IPR001715 (SUPERFAMILY)                                                                                                                                                                                                                                                               |
| 608 | 378975_length_562_cvg_2.8_tip_1_1  | 6     | latrophilin- partial                                           | 187 | 8.95E-51 | 91.90% | 0.354 Y | IPR000832 (PFAM); PTHR12011:SF258 (PANTHER); PTHR12011 (PANTHER); TRANSMEMBRANE (PHOBIUS); TRANSMEMBRANE (PHOBIUS); NON_CYTOPLASMIC_DOMAIN (PHOBIUS); TRANSMEMBRANE (PHOBIUS); NON_CYTOPLASMIC_DOMAIN (PHOBIUS); NON_CYTOPLASMIC_DOMAIN (PHOBIUS); CYTOPLASMIC_DOMAIN (PHOBIUS); CYTOPLASMIC_DOMAIN (PHOBIUS); IPR017981 (PROSITE_PROFILES); TMhelix (TMHMM); TMhelix (TMHMM); TMhelix (TMHMM); TMhelix (TMHMM)                                                                    |
| 609 | 378975_length_562_cvg_2.8_tip_1_2  | 6     | latrophilin cirl-like isoform x1                               | 187 | 3.09E-34 | 79.50% | 0.176   | IPR000832 (PFAM); PTHR12011:SF258 (PANTHER); PTHR12011 (PANTHER); NON_CYTOPLASMIC_DOMAIN (PHOBIUS); CYTOPLASMIC_DOMAIN (PHOBIUS); TRANSMEMBRANE (PHOBIUS); NON_CYTOPLASMIC_DOMAIN (PHOBIUS); TRANSMEMBRANE (PHOBIUS); TRANSMEMBRANE (PHOBIUS); CYTOPLASMIC_DOMAIN (PHOBIUS); TMhelix (TMHMM); TMhelix (TMHMM)                                                                                                                                                                      |
| 610 | 379319_length_563_cvg_5.8_tip_1_3  | 12    | perq amino acid-rich with gyf domain-containing protein 2-like | 188 | 3.46E-32 | 63.90% | 0.112   | IPR000884 (SMART); IPR000884 (PFAM); G3DSA:2.20.100.10 (GENE3D); PTHR11311 (PANTHER); IPR000884 (PROSITE_PROFILES); IPR000884 (PROSITE_PROFILES); IPR000884 (SUPERFAMILY); IPR000884 (SUPERFAMILY)                                                                                                                                                                                                                                                                                 |
| 611 | 379831_length_565_cvg_56.3_tip_1_2 | 147   | 14-3-3 zeta                                                    | 188 | 3.75E-88 | 95.00% | 0.124   | Coil (COILS); IPR000308 (PRINTS); IPR023410 (SMART); G3DSA:1.20.190.20 (GENE3D); IPR023410 (PFAM); IPR000308 (PANTHER); IPR023409 (PROSITE_PATTERNS); IPR023410 (SUPERFAMILY)                                                                                                                                                                                                                                                                                                      |
| 612 | 379955_length_565_cvg_2.0_tip_1_0  | 4     | poly -specific endoribonuclease homolog                        | 189 | 3.35E-48 | 62.40% | 0.1     | IPR018998 (PFAM); PTHR12439 (PANTHER); SSF142877 (SUPERFAMILY)                                                                                                                                                                                                                                                                                                                                                                                                                     |
| 613 | 380374_length_567_cvg_2.0_tip_1_1  | 6     | transposable element tc3 partial                               | 189 | 3.24E-35 | 57.40% | 0.106   | PTHR23022:SF53 (PANTHER); PTHR23022 (PANTHER)                                                                                                                                                                                                                                                                                                                                                                                                                                      |
| 614 | 380470_length_567_cvg_68.8_tip_1_1 | 1460  | fk506-binding protein 2 isoform x1                             | 189 | 1.32E-72 | 81.70% | 0.294   | G3DSA:3.10.50.40 (GENE3D); IPR001179 (PFAM); IPR023566 (PANTHER); PTHR10516:SF252 (PANTHER); NON_CYTOPLASMIC_DOMAIN (PHOBIUS); SIGNAL_PEPTIDE_N_REGION (PHOBIUS); SIGNAL_PEPTIDE_H_REGION (PHOBIUS); SIGNAL_PEPTIDE (PHOBIUS); SIGNAL_PEPTIDE_C_REGION (PHOBIUS); IPR001179 (PROSITE_PROFILES); SSF54534 (SUPERFAMILY)                                                                                                                                                             |
| 615 | 380582_length_567_cvg_19.0_tip_1_0 | 36    | zinc finger protein 699-like                                   | 189 | 2.31E-20 | 55.90% | 0.1     | IPR015880 (SMART); IPR013087 (G3DSA:3.30.160.GENE3D); IPR013087 (G3DSA:3.30.160.GENE3D); PF13465 (PFAM); IPR013087 (G3DSA:3.30.160.GENE3D); PTHR24409 (PANTHER); IPR007087 (PROSITE_PATTERNS); IPR007087 (PROSITE_PATTERNS); IPR007087 (PROSITE_PATTERNS); IPR007087 (PROSITE_PROFILES); IPR007087 (PROSITE_PROFILES); SSF57667 (SUPERFAMILY); SSF57667 (SUPERFAMILY)                                                                                                              |
| 616 | 380822_length_568_cvg_64.4_tip_0_2 | 40185 | chitinase 2                                                    | 189 | 9.95E-45 | 65.70% | 0.162   | IPR011583 (SMART); IPR013781 (G3DSA:3.20.20.GENE3D); IPR001223 (PFAM); PTHR11177 (PANTHER); PTHR11177:SF112 (PANTHER); TRANSMEMBRANE (PHOBIUS); CYTOPLASMIC_DOMAIN (PHOBIUS); NON_CYTOPLASMIC_DOMAIN (PHOBIUS); IPR017853 (SUPERFAMILY); TMhelix (TMHMM)                                                                                                                                                                                                                           |
| 617 | 380840_length_568_cvg_2.0_tip_1_1  | 4     | sonic hedgehog protein a                                       | 189 | 4.98E-36 | 56.40% | 0.108   | IPR001657 (PRINTS); IPR003586 (SMART); IPR001767 (PFAM); IPR028992 (G3DSA:2.170.16.GENE3D); PTHR11889 (PANTHER); IPR028992 (SUPERFAMILY)                                                                                                                                                                                                                                                                                                                                           |
| 618 | 380888_length_568_cvg_30.6_tip_1_3 | 71    | low-density lipoprotein receptor domain class a                | 190 | 1.61E-16 | 61.20% | 0.17    | IPR002172 (PRINTS); IPR002172 (SMART); IPR002172 (G3DSA:4.10.400.GENE3D); IPR002172 (G3DSA:4.10.400.GENE3D); IPR002172 (PFAM); PTHR10529:SF208 (PANTHER); PTHR10529 (PANTHER); IPR023415 (PROSITE_PATTERNS); IPR023415 (PROSITE_PATTERNS); TRANSMEMBRANE (PHOBIUS); NON_CYTOPLASMIC_DOMAIN (PHOBIUS); CYTOPLASMIC_DOMAIN (PHOBIUS); IPR002172 (PROSITE_PROFILES); IPR002172 (PROSITE_PROFILES); IPR002172 (SUPERFAMILY); IPR002172 (SUPERFAMILY); TMhelix (TMHMM); TMhelix (TMHMM) |



|     |                                    |       |                                                                      |     |           |         |         |                                                                                                                                                                                                                                                                                                                                                                                                                                                                                  |
|-----|------------------------------------|-------|----------------------------------------------------------------------|-----|-----------|---------|---------|----------------------------------------------------------------------------------------------------------------------------------------------------------------------------------------------------------------------------------------------------------------------------------------------------------------------------------------------------------------------------------------------------------------------------------------------------------------------------------|
| 619 | 380938_length_568_cvg_2.0_tip_1_3  | 5     | voltage-dependent calcium channel type a subunit alpha-1 isoform x3  | 190 | 2.41E-101 | 90.20%  | 0.176   | IPR002077 (PRINTS); IPR005821 (PFAM); IPR005448 (PTHR10037:PANTHER); PTHR10037 (PANTHER); CYTOPLASMIC_DOMAIN (PHOBIUS); TRANSMEMBRANE (PHOBIUS); CYTOPLASMIC_DOMAIN (PHOBIUS); NON_CYTOPLASMIC_DOMAIN (PHOBIUS); TRANSMEMBRANE (PHOBIUS); SSF81324 (SUPERFAMILY); TMhelix (TMHMM); TMhelix (TMHMM); TMhelix (TMHMM)                                                                                                                                                              |
| 621 | 381276_length_569_cvg_2.0_tip_1_4  | 2     | lipase 3                                                             | 190 | 1.33E-72  | 70.60%  | 0.161   | IPR000073 (PFAM); IPR029058 (G3DSA:3.40.50.GENE3D); IPR006693 (PFAM); PTHR11005 (PANTHER); IPR029058 (SUPERFAMILY)                                                                                                                                                                                                                                                                                                                                                               |
| 622 | 381888_length_571_cvg_2.0_tip_1_1  | 5     | outer membrane autotransporter barrel domain protein                 | 190 | 1.46E-133 | 100.00% | 0.102   | IPR005546 (G3DSA:2.40.128.GENE3D); IPR006315 (TIGRFAM); IPR005546 (PFAM); PTHR12338 (PANTHER); IPR005546 (PROSITE_PROFILES); IPR005546 (SUPERFAMILY)                                                                                                                                                                                                                                                                                                                             |
| 623 | 382056_length_572_cvg_2.4_tip_1_2  | 5     | metabotropic gaba-b receptor subtype isoform b                       | 190 | 3.69E-21  | 96.10%  | 0.243   | G3DSA:3.40.50.2300 (GENE3D); PTHR10519:SF3 (PANTHER); IPR002455 (PANTHER); TRANSMEMBRANE (PHOBIUS); CYTOPLASMIC_DOMAIN (PHOBIUS); NON_CYTOPLASMIC_DOMAIN (PHOBIUS); IPR028082 (SUPERFAMILY)                                                                                                                                                                                                                                                                                      |
| 631 | 385762_length_584_cvg_3.4_tip_1_0  | 6     | low quality protein: zinc finger protein 333                         | 190 | 2.39E-22  | 65.10%  | 0.316   | IPR015880 (SMART); PF13894 (PFAM); IPR007087 (PFAM); IPR013087 (G3DSA:3.30.160.GENE3D); IPR013087 (G3DSA:3.30.160.GENE3D); PTHR24409:SF13 (PANTHER); PTHR24409 (PANTHER); IPR007087 (PROSITE_PATTERNS); IPR007087 (PROSITE_PATTERNS); IPR007087 (PROSITE_PATTERNS); IPR007087 (PROSITE_PATTERNS); IPR007087 (PROSITE_PROFILES); IPR007087 (PROSITE_PROFILES); IPR007087 (PROSITE_PROFILES); IPR007087 (PROSITE_PROFILES); SSF57667 (SUPERFAMILY); SSF57667 (SUPERFAMILY)         |
| 624 | 382814_length_575_cvg_90.4_tip_1_4 | 27006 | basement membrane-specific heparan sulfate proteoglycan core protein | 192 | 1.15E-24  | 60.70%  | 0.535 Y | IPR002172 (PRINTS); IPR002172 (SMART); IPR002172 (PFAM); IPR002172 (G3DSA:4.10.400.GENE3D); IPR002172 (G3DSA:4.10.400.GENE3D); IPR002172 (G3DSA:4.10.400.GENE3D); PTHR10529 (PANTHER); IPR023415 (PROSITE_PATTERNS); IPR023415 (PROSITE_PATTERNS); IPR023415 (PROSITE_PATTERNS); IPR002172 (PROSITE_PROFILES); IPR002172 (PROSITE_PROFILES); IPR002172 (PROSITE_PROFILES); SignalP-noTM (SIGNALP_EUK); IPR002172 (SUPERFAMILY); IPR002172 (SUPERFAMILY); IPR002172 (SUPERFAMILY) |
| 625 | 384012_length_579_cvg_2.9_tip_1_3  | 5     | otopettrin-2 isoform x1                                              | 193 | 3.51E-62  | 76.70%  | 0.218   | IPR004878 (PFAM); IPR004878 (PANTHER); PTHR21522:SF37 (PANTHER); TRANSMEMBRANE (PHOBIUS); TRANSMEMBRANE (PHOBIUS); CYTOPLASMIC_DOMAIN (PHOBIUS); TRANSMEMBRANE (PHOBIUS); NON_CYTOPLASMIC_DOMAIN (PHOBIUS); CYTOPLASMIC_DOMAIN (PHOBIUS); NON_CYTOPLASMIC_DOMAIN (PHOBIUS); TMhelix (TMHMM); TMhelix (TMHMM); TMhelix (TMHMM)                                                                                                                                                    |
| 626 | 385008_length_582_cvg_18.6_tip_1_2 | 35    | cytochrome p450 partial                                              | 194 | 1.61E-62  | 69.30%  | 0.148   | IPR002401 (PRINTS); IPR001128 (PRINTS); IPR001128 (G3DSA:1.10.630.GENE3D); IPR001128 (PFAM); PTHR24305 (PANTHER); PTHR24305:SF49 (PANTHER); IPR017972 (PROSITE_PATTERNS); IPR001128 (SUPERFAMILY)                                                                                                                                                                                                                                                                                |
| 627 | 385244_length_583_cvg_12.0_tip_1_1 | 16    | acetylcholine receptor subunit alpha-type acr-16                     | 194 | 1.78E-40  | 59.70%  | 0.610 Y | IPR006201 (PRINTS); IPR002394 (PRINTS); IPR006202 (PFAM); IPR006202 (G3DSA:2.70.170.GENE3D); IPR006201 (PANTHER); PTHR18945:SF490 (PANTHER); SIGNAL_PEPTIDE_C_REGION (PHOBIUS); NON_CYTOPLASMIC_DOMAIN (PHOBIUS); SIGNAL_PEPTIDE_H_REGION (PHOBIUS); TRANSMEMBRANE (PHOBIUS); SIGNAL_PEPTIDE (PHOBIUS); CYTOPLASMIC_DOMAIN (PHOBIUS); SIGNAL_PEPTIDE_N_REGION (PHOBIUS); SignalP-TM (SIGNALP_EUK); IPR006202 (SUPERFAMILY)                                                       |
| 628 | 385324_length_583_cvg_2.2_tip_1_2  | 6     | alpha c-terminal all-beta domain protein                             | 194 | 8.14E-137 | 98.00%  | 0.118   | IPR017853 (SUPERFAMILY)                                                                                                                                                                                                                                                                                                                                                                                                                                                          |
| 630 | 385556_length_584_cvg_3.0_tip_1_5  | 6     | cysteine-rich with egf-like domain protein 2                         | 194 | 3.31E-21  | 72.90%  | 0.112   | IPR021852 (PFAM); PTHR24838:SF251 (PANTHER); PTHR24838 (PANTHER)                                                                                                                                                                                                                                                                                                                                                                                                                 |
| 632 | 385970_length_585_cvg_2.0_tip_1_3  | 4     | low quality protein: protein lap4-like                               | 195 | 1.67E-90  | 82.60%  | 0.131   | IPR001478 (SMART); IPR001478 (G3DSA:2.30.42.GENE3D); IPR001478 (G3DSA:2.30.42.GENE3D); IPR016313 (PANTHER); IPR001478 (PROSITE_PROFILES); IPR001478 (PROSITE_PROFILES); IPR001478 (SUPERFAMILY); IPR001478 (SUPERFAMILY)                                                                                                                                                                                                                                                         |
| 633 | 386018_length_585_cvg_27.0_tip_1_2 | 59    | dehydrogenase reductase sdr family member 11 isoform x1              | 195 | 8.03E-42  | 73.60%  | 0.105   | IPR016040 (G3DSA:3.40.50.GENE3D); IPR002198 (PFAM); PTHR24322:SF310 (PANTHER); PTHR24322 (PANTHER); SSF51735 (SUPERFAMILY)                                                                                                                                                                                                                                                                                                                                                       |

|     |                                    |      |                                                                  |     |           |        |         |                                                                                                                                                                                                                                                                                                                                                                                                                                                                                                                                                                                                                                                                                             |
|-----|------------------------------------|------|------------------------------------------------------------------|-----|-----------|--------|---------|---------------------------------------------------------------------------------------------------------------------------------------------------------------------------------------------------------------------------------------------------------------------------------------------------------------------------------------------------------------------------------------------------------------------------------------------------------------------------------------------------------------------------------------------------------------------------------------------------------------------------------------------------------------------------------------------|
| 634 | 386026_length_585_cvg_13.4_tip_1_0 | 27   | zinc finger protein 227                                          | 195 | 5.64E-53  | 70.00% | 0.118   | IPR015880 (SMART); PF13465 (PFAM); IPR013087 (G3DSA:3.30.160.GENE3D); IPR013087 (G3DSA:3.30.160.GENE3D); IPR013087 (G3DSA:3.30.160.GENE3D); PTHR24409 (PANTHER); IPR007087 (PROSITE_PATTERNS); IPR007087 (PROSITE_PATTERNS); IPR007087 (PROSITE_PATTERNS); IPR007087 (PROSITE_PATTERNS); IPR007087 (PROSITE_PATTERNS); TRANSMEMBRANE (PHOBIUS); CYTOPLASMIC_DOMAIN (PHOBIUS); NON_CYTOPLASMIC_DOMAIN (PHOBIUS); IPR007087 (PROSITE_PROFILES); IPR007087 (PROSITE_PROFILES); IPR007087 (PROSITE_PROFILES); IPR007087 (PROSITE_PROFILES); IPR007087 (PROSITE_PROFILES); IPR007087 (PROSITE_PROFILES); SSF57667 (SUPERFAMILY); SSF57667 (SUPERFAMILY); SSF57667 (SUPERFAMILY); TMhelix (TMHMM) |
| 636 | 387006_length_589_cvg_9.3_tip_1_1  | 21   | kazal-type serine protease inhibitor domain-containing protein 1 | 196 | 3.51E-37  | 59.70% | 0.430 Y | IPR002350 (SMART); IPR000867 (SMART); IPR002350 (PFAM); IPR000867 (PFAM); G3DSA:3.30.60.30 (GENE3D); PTHR14186:SF9 (PANTHER); IPR011390 (PANTHER); NON_CYTOPLASMIC_DOMAIN (PHOBIUS); SIGNAL_PEPTIDE (PHOBIUS); SIGNAL_PEPTIDE_H_REGION (PHOBIUS); SIGNAL_PEPTIDE_C_REGION (PHOBIUS); SIGNAL_PEPTIDE_N_REGION (PHOBIUS); IPR000867 (PROSITE_PROFILES); IPR002350 (PROSITE_PROFILES); SSF100895 (SUPERFAMILY); IPR009030 (SUPERFAMILY); TMhelix (TMHMM)                                                                                                                                                                                                                                       |
| 637 | 387016_length_589_cvg_4.4_tip_1_1  | 9    | leukocyte elastase inhibitor isoform x2                          | 196 | 1.31E-38  | 56.30% | 0.101   | IPR023796 (SMART); IPR023796 (PFAM); G3DSA:3.30.497.10 (GENE3D); G3DSA:2.30.39.10 (GENE3D); IPR000215 (PANTHER); IPR023796 (SUPERFAMILY)                                                                                                                                                                                                                                                                                                                                                                                                                                                                                                                                                    |
| 639 | 387218_length_589_cvg_3.0_tip_1_5  | 5    | otogelin- partial                                                | 196 | 2.32E-13  | 44.30% | 0.12    | no IPS match                                                                                                                                                                                                                                                                                                                                                                                                                                                                                                                                                                                                                                                                                |
| 667 | 393627_length_612_cvg_77.0_tip_1_0 | 6665 | ubiquitin-60s ribosomal protein l40                              | 196 | 1.58E-85  | 99.10% | 0.104   | IPR019956 (PRINTS); IPR000626 (SMART); IPR001975 (PFAM); G3DSA:3.10.20.90 (GENE3D); IPR000626 (PFAM); PTHR10666 (PANTHER); IPR019954 (PROSITE_PATTERNS); IPR000626 (PROSITE_PROFILES); IPR029071 (SUPERFAMILY); IPR011332 (SUPERFAMILY)                                                                                                                                                                                                                                                                                                                                                                                                                                                     |
| 638 | 387142_length_589_cvg_2.7_tip_1_3  | 4    | vitellogenin fused with superoxide dismutase                     | 197 | 3.60E-07  | 52.00% | 0.11    | no IPS match                                                                                                                                                                                                                                                                                                                                                                                                                                                                                                                                                                                                                                                                                |
| 640 | 387262_length_589_cvg_2.7_tip_1_0  | 8    | catalase peroxidase partial                                      | 197 | 1.36E-136 | 99.90% | 0.104   | IPR002016 (PRINTS); G3DSA:1.10.520.10 (GENE3D); G3DSA:1.10.420.10 (GENE3D); IPR002016 (PFAM); PTHR30555 (PANTHER); PTHR30555:SF0 (PANTHER); IPR019793 (PROSITE_PATTERNS); IPR010255 (SUPERFAMILY)                                                                                                                                                                                                                                                                                                                                                                                                                                                                                           |
| 641 | 388034_length_592_cvg_2.8_tip_1_4  | 5    | cyclin-dependent kinase 1 isoform x1                             | 197 | 1.70E-110 | 94.50% | 0.098   | IPR002290 (SMART); G3DSA:1.10.510.10 (GENE3D); IPR000719 (PFAM); G3DSA:3.30.200.20 (GENE3D); PTHR24056 (PANTHER); IPR017441 (PROSITE_PATTERNS); IPR008271 (PROSITE_PATTERNS); IPR000719 (PROSITE_PROFILES); IPR011009 (SUPERFAMILY)                                                                                                                                                                                                                                                                                                                                                                                                                                                         |
| 642 | 388178_length_592_cvg_2.0_tip_1_4  | 4    | zinc finger protein                                              | 197 | 4.26E-38  | 57.20% | 0.099   | IPR015880 (SMART); IPR013087 (G3DSA:3.30.160.GENE3D); IPR013087 (G3DSA:3.30.160.GENE3D); IPR007087 (PFAM); IPR013087 (G3DSA:3.30.160.GENE3D); IPR013087 (G3DSA:3.30.160.GENE3D); PF13465 (PFAM); PF13894 (PFAM); PTHR24409:SF14 (PANTHER); PTHR24409 (PANTHER); IPR007087 (PROSITE_PATTERNS); IPR007087 (PROSITE_PATTERNS); IPR007087 (PROSITE_PATTERNS); IPR007087 (PROSITE_PATTERNS); IPR007087 (PROSITE_PATTERNS); IPR007087 (PROSITE_PROFILES); IPR007087 (PROSITE_PROFILES); IPR007087 (PROSITE_PROFILES); IPR007087 (PROSITE_PROFILES); IPR007087 (PROSITE_PROFILES); IPR007087 (PROSITE_PROFILES); SSF57667 (SUPERFAMILY); SSF57667 (SUPERFAMILY); SSF57667 (SUPERFAMILY);           |
| 643 | 388308_length_593_cvg_2.0_tip_1_0  | 6    | low quality protein: mucin-19                                    | 198 | 1.73E-11  | 44.60% | 0.165   | SSF141571 (SUPERFAMILY); TMhelix (TMHMM); TMhelix (TMHMM); TMhelix (TMHMM)                                                                                                                                                                                                                                                                                                                                                                                                                                                                                                                                                                                                                  |
| 644 | 388582_length_594_cvg_3.0_tip_1_1  | 5    | serine protease                                                  | 198 | 4.35E-13  | 65.30% | 0.14    | NON_CYTOPLASMIC_DOMAIN (PHOBIUS); NON_CYTOPLASMIC_DOMAIN (PHOBIUS); CYTOPLASMIC_DOMAIN (PHOBIUS); TRANSMEMBRANE (PHOBIUS); NON_CYTOPLASMIC_DOMAIN (PHOBIUS); TRANSMEMBRANE (PHOBIUS); TRANSMEMBRANE (PHOBIUS); CYTOPLASMIC_DOMAIN (PHOBIUS); TRANSMEMBRANE (PHOBIUS); TMhelix (TMHMM); TMhelix (TMHMM); TMhelix (TMHMM); TMhelix (TMHMM);                                                                                                                                                                                                                                                                                                                                                   |
| 645 | 388582_length_594_cvg_3.0_tip_1_3  | 5    | exosporium glycoprotein                                          | 198 | 7.47E-25  | 72.90% | 0.297   | TRANSMEMBRANE (PHOBIUS); CYTOPLASMIC_DOMAIN (PHOBIUS); NON_CYTOPLASMIC_DOMAIN (PHOBIUS); TMhelix (TMHMM); TMhelix (TMHMM); TMhelix (TMHMM);                                                                                                                                                                                                                                                                                                                                                                                                                                                                                                                                                 |
| 646 | 388718_length_594_cvg_62.4_tip_1_1 | 1475 | chymotrypsin-like protease ctrl-1                                | 198 | 5.28E-16  | 56.40% | 0.245   | IPR001314 (PRINTS); IPR001254 (PFAM); G3DSA:2.40.10.10 (GENE3D); G3DSA:2.40.10.10 (GENE3D); PTHR24259 (PANTHER); IPR018114 (PROSITE_PATTERNS); IPR001254 (PROSITE_PROFILES); IPR009003 (SUPERFAMILY)                                                                                                                                                                                                                                                                                                                                                                                                                                                                                        |
| 647 | 388978_length_595_cvg_6.0_tip_1_2  | 16   | pc3-like endoprotease variant b-like                             | 198 | 2.22E-38  | 63.00% | 0.102   | IPR015500 (PRINTS); IPR000209 (PFAM); IPR000209 (G3DSA:3.40.50.GENE3D); IPR015500 (PANTHER); PTHR10795:SF310 (PANTHER); IPR023827 (PROSITE_PATTERNS); IPR000209 (SUPERFAMILY)                                                                                                                                                                                                                                                                                                                                                                                                                                                                                                               |

|     |                                    |      |                                                             |     |           |         |         |                                                                                                                                                                                                                                                                                                                                                                                                                                                   |
|-----|------------------------------------|------|-------------------------------------------------------------|-----|-----------|---------|---------|---------------------------------------------------------------------------------------------------------------------------------------------------------------------------------------------------------------------------------------------------------------------------------------------------------------------------------------------------------------------------------------------------------------------------------------------------|
| 648 | 389222_length_596_cvg_6.5_tip_1_2  | 17   | secreted salivary gland                                     | 198 | 2.70E-10  | 70.80%  | 0.251   | IPR001254 (PFAM); G3DSA:2.40.10.10 (GENE3D); PTHR24268 (PANTHER); PTHR24268:SF85 (PANTHER); CYTOPLASMIC_DOMAIN (PHOBIUS); TRANSMEMBRANE (PHOBIUS); NON_CYTOPLASMIC_DOMAIN (PHOBIUS); IPR001254 (PROSITE_PROFILES); IPR009003 (SUPERFAMILY)                                                                                                                                                                                                        |
| 673 | 396057_length_621_cvg_93.1_tip_1_0 | 2757 | glyceraldehyde-3-phosphate dehydrogenase                    | 198 | 3.19E-11  | 89.10%  | 0.121   | IPR020831 (PANTHER); PTHR10836:SF31 (PANTHER); TRANSMEMBRANE (PHOBIUS); TRANSMEMBRANE (PHOBIUS); CYTOPLASMIC_DOMAIN (PHOBIUS); CYTOPLASMIC_DOMAIN (PHOBIUS); NON_CYTOPLASMIC_DOMAIN (PHOBIUS)                                                                                                                                                                                                                                                     |
| 649 | 389278_length_596_cvg_3.6_tip_1_1  | 7    | protein creg1                                               | 199 | 1.96E-57  | 76.60%  | 0.106   | PF13883 (PFAM); IPR012349 (G3DSA:2.30.110.GENE3D); PTHR13343 (PANTHER); PTHR13343:SF12 (PANTHER); IPR012349 (SUPERFAMILY)                                                                                                                                                                                                                                                                                                                         |
| 650 | 389306_length_596_cvg_5.4_tip_1_1  | 6    | protein will die slowly                                     | 199 | 3.96E-141 | 98.90%  | 0.118   | IPR020472 (PRINTS); IPR001680 (SMART); IPR001680 (PFAM); IPR015943 (G3DSA:2.130.10.GENE3D); PTHR22847:SF308 (PANTHER); PTHR22847 (PANTHER); IPR019775 (PROSITE_PATTERNS); IPR019775 (PROSITE_PATTERNS); IPR019775 (PROSITE_PATTERNS); IPR001680 (PROSITE_PROFILES); IPR001680 (PROSITE_PROFILES); IPR001680 (PROSITE_PROFILES); IPR001680 (PROSITE_PROFILES); IPR017986 (PROSITE_PROFILES); IPR001680 (PROSITE_PROFILES); IPR017986 (SUPERFAMILY) |
| 651 | 389926_length_598_cvg_2.0_tip_1_5  | 6    | tyrosine-protein phosphatase partial                        | 199 | 5.91E-25  | 50.90%  | 0.106   | IPR000242 (PRINTS); IPR000242 (SMART); IPR029021 (G3DSA:3.90.190.GENE3D); IPR000242 (PFAM); PTHR19134 (PANTHER); PTHR19134:SF81 (PANTHER); IPR000242 (PROSITE_PROFILES); IPR029021 (SUPERFAMILY)                                                                                                                                                                                                                                                  |
| 682 | 399076_length_632_cvg_6.0_tip_1_5  | 10   | mesencephalic astrocyte-derived neurotrophic factor homolog | 199 | 6.92E-73  | 85.00%  | 0.166   | IPR019345 (PFAM); IPR011001 (G3DSA:1.10.225.GENE3D); PTHR12990 (PANTHER); CYTOPLASMIC_DOMAIN (PHOBIUS); NON_CYTOPLASMIC_DOMAIN (PHOBIUS); TRANSMEMBRANE (PHOBIUS); SSF68906 (SUPERFAMILY); TMhelix (TMHMM)                                                                                                                                                                                                                                        |
| 652 | 390444_length_600_cvg_2.7_tip_1_4  | 10   | annexin b10-like                                            | 200 | 2.63E-39  | 80.10%  | 0.107   | IPR018502 (SMART); IPR018502 (PFAM); IPR018502 (G3DSA:1.10.220.GENE3D); PTHR10502 (PANTHER); SSF47874 (SUPERFAMILY)                                                                                                                                                                                                                                                                                                                               |
| 654 | 391011_length_602_cvg_91.8_tip_0_3 | 1967 | carboxypeptidase b-like                                     | 201 | 7.31E-83  | 68.70%  | 0.107   | IPR000834 (SMART); G3DSA:3.40.630.10 (GENE3D); IPR000834 (PFAM); PTHR11705 (PANTHER); SSF53187 (SUPERFAMILY)                                                                                                                                                                                                                                                                                                                                      |
| 655 | 391067_length_603_cvg_62.5_tip_1_5 | 3082 | ubiquitin-40s ribosomal protein s27a-like                   | 201 | 4.35E-94  | 95.50%  | 0.241   | IPR019956 (PRINTS); IPR000626 (SMART); IPR000626 (PFAM); G3DSA:3.10.20.90 (GENE3D); IPR002906 (PFAM); PTHR10666:SF99 (PANTHER); PTHR10666 (PANTHER); IPR019954 (PROSITE_PATTERNS); IPR000626 (PROSITE_PROFILES); IPR029071 (SUPERFAMILY); IPR011332 (SUPERFAMILY)                                                                                                                                                                                 |
| 656 | 391107_length_603_cvg_5.8_tip_1_0  | 9    | calcium calmodulin-dependent protein kinase type 1          | 201 | 1.88E-53  | 97.10%  | 0.1     | IPR002290 (SMART); IPR000719 (PFAM); G3DSA:1.10.510.10 (GENE3D); PTHR24347:SF116 (PANTHER); IPR020636 (PANTHER); IPR008271 (PROSITE_PATTERNS); NON_CYTOPLASMIC_DOMAIN (PHOBIUS); TRANSMEMBRANE (PHOBIUS); CYTOPLASMIC_DOMAIN (PHOBIUS); NON_CYTOPLASMIC_DOMAIN (PHOBIUS); TRANSMEMBRANE (PHOBIUS); IPR000719 (PROSITE_PROFILES); IPR011009 (SUPERFAMILY); TMhelix (TMHMM); TMhelix (TMHMM)                                                        |
| 657 | 391227_length_603_cvg_6.2_tip_1_5  | 13   | neogenin isoform x3                                         | 201 | 9.99E-12  | 74.20%  | 0.109   | IPR013783 (G3DSA:2.60.40.GENE3D); IPR013098 (PFAM); NON_CYTOPLASMIC_DOMAIN (PHOBIUS); NON_CYTOPLASMIC_DOMAIN (PHOBIUS); TRANSMEMBRANE (PHOBIUS); TRANSMEMBRANE (PHOBIUS); CYTOPLASMIC_DOMAIN (PHOBIUS); IPR007110 (PROSITE_PROFILES); SSF48726 (SUPERFAMILY)                                                                                                                                                                                      |
| 658 | 391877_length_606_cvg_3.4_tip_1_1  | 6    | proactivator polypeptide                                    | 202 | 3.01E-64  | 67.30%  | 0.127   | IPR008373 (PRINTS); IPR003119 (SMART); IPR008139 (SMART); IPR011001 (G3DSA:1.10.225.GENE3D); IPR003119 (PFAM); IPR007856 (PFAM); IPR008138 (PFAM); PTHR11480 (PANTHER); PTHR11480:SF3 (PANTHER); IPR003119 (PROSITE_PROFILES); IPR008139 (PROSITE_PROFILES); IPR011001 (SUPERFAMILY)                                                                                                                                                              |
| 660 | 392439_length_608_cvg_2.0_tip_1_2  | 6    | phenoloxidase subunit a3                                    | 202 | 1.90E-62  | 65.80%  | 0.102   | IPR000896 (PFAM); IPR008922 (G3DSA:1.10.1280.GENE3D); PTHR11511:SF24 (PANTHER); IPR013788 (PANTHER); IPR013788 (PROSITE_PATTERNS); IPR002227 (PROSITE_PATTERNS); IPR008922 (SUPERFAMILY)                                                                                                                                                                                                                                                          |
| 659 | 392419_length_608_cvg_22.7_tip_1_4 | 55   | vp302_lycmc ame: full=venom protein 302 flags: precursor    | 203 | 2.24E-14  | 55.80%  | 0.718 Y | PTHR14186:SF8 (PANTHER); IPR011390 (PANTHER); SIGNAL_PEPTIDE_N_REGION (PHOBIUS); NON_CYTOPLASMIC_DOMAIN (PHOBIUS); SIGNAL_PEPTIDE (PHOBIUS); SIGNAL_PEPTIDE_H_REGION (PHOBIUS); SIGNAL_PEPTIDE_C_REGION (PHOBIUS); IPR000867 (PROSITE_PROFILES); SignalP-noTM (SIGNALP_EUK); SignalP-TM (SIGNALP_GRAM_POSITIVE); IPR009030 (SUPERFAMILY)                                                                                                          |
| 661 | 392483_length_608_cvg_2.0_tip_1_4  | 4    | lysine--trna partial                                        | 203 | 2.86E-146 | 100.00% | 0.101   | IPR018149 (PRINTS); IPR004365 (PFAM); G3DSA:3.30.930.10 (GENE3D); IPR012340 (G3DSA:2.40.50.GENE3D); IPR004364 (PFAM); IPR018150 (PANTHER); PTHR22594:SF25 (PANTHER); IPR006195 (PROSITE_PROFILES); SSF55681 (SUPERFAMILY); IPR012340 (SUPERFAMILY)                                                                                                                                                                                                |

|     |                                    |       |                                                  |     |          |        |       |                                                                                                                                                                                                                                                                                                                                                                                                                                                                         |
|-----|------------------------------------|-------|--------------------------------------------------|-----|----------|--------|-------|-------------------------------------------------------------------------------------------------------------------------------------------------------------------------------------------------------------------------------------------------------------------------------------------------------------------------------------------------------------------------------------------------------------------------------------------------------------------------|
| 662 | 392707_length_609_cvg_24.5_tip_1_2 | 54    | zinc finger and btb domain-containing protein 48 | 203 | 4.67E-19 | 53.00% | 0.098 | IPR015880 (SMART); PF13465 (PFAM); PF13894 (PFAM); IPR013087 (G3DSA:3.30.160.GENE3D); PTHR24409:SF13 (PANTHER); PTHR24409 (PANTHER); IPR007087 (PROSITE_PATTERNS); IPR007087 (PROSITE_PATTERNS); IPR007087 (PROSITE_PATTERNS); IPR007087 (PROSITE_PROFILES); IPR007087 (PROSITE_PROFILES); IPR007087 (PROSITE_PROFILES); SSF57667 (SUPERFAMILY); SSF57667 (SUPERFAMILY)                                                                                                 |
| 663 | 392841_length_609_cvg_15.7_tip_1_0 | 44    | bone morphogenetic protein 5 8 precursor         | 203 | 1.44E-42 | 91.20% | 0.119 | IPR001839 (SMART); IPR001839 (PFAM); IPR029034 (G3DSA:2.10.90.GENE3D); IPR015615 (PANTHER); PTHR11848:SF137 (PANTHER); NON_CYTOPLASMIC_DOMAIN (PHOBIUS); TRANSMEMBRANE (PHOBIUS); CYTOPLASMIC_DOMAIN (PHOBIUS); TRANSMEMBRANE (PHOBIUS); CYTOPLASMIC_DOMAIN (PHOBIUS); IPR001839 (PROSITE_PROFILES); IPR029034 (SUPERFAMILY); TMhelix (TMHMM); TMhelix (TMHMM)                                                                                                          |
| 664 | 393101_length_610_cvg_2.0_tip_1_1  | 6     | protein sidekick-1                               | 203 | 9.76E-12 | 50.40% | 0.167 | IPR013098 (PFAM); IPR013783 (G3DSA:2.60.40.GENE3D); IPR007110 (PROSITE_PROFILES); SSF48726 (SUPERFAMILY)                                                                                                                                                                                                                                                                                                                                                                |
| 665 | 393355_length_611_cvg_3.2_tip_1_2  | 5     | ---NA---                                         | 203 |          |        | 0.149 | CYTOPLASMIC_DOMAIN (PHOBIUS); NON_CYTOPLASMIC_DOMAIN (PHOBIUS); CYTOPLASMIC_DOMAIN (PHOBIUS); TRANSMEMBRANE (PHOBIUS); TRANSMEMBRANE (PHOBIUS)                                                                                                                                                                                                                                                                                                                          |
| 666 | 393579_length_612_cvg_35.8_tip_0_3 | 63    | serine protease nudel                            | 204 | 1.29E-16 | 51.90% | 0.1   | IPR002172 (SMART); IPR001190 (PFAM); IPR002172 (PFAM); IPR002172 (G3DSA:4.10.400.GENE3D); IPR002172 (G3DSA:4.10.400.GENE3D); IPR017448 (G3DSA:3.10.250.GENE3D); IPR023415 (PROSITE_PATTERNS); IPR001190 (PROSITE_PROFILES); IPR002172 (PROSITE_PROFILES); IPR002172 (SUPERFAMILY); IPR017448 (SUPERFAMILY)                                                                                                                                                              |
| 668 | 393999_length_614_cvg_69.2_tip_1_2 | 24117 | venom allergen 3-like                            | 204 | 1.27E-25 | 53.40% | 0.305 | IPR002413 (PRINTS); IPR014044 (SMART); IPR014044 (PFAM); IPR014044 (G3DSA:3.40.33.GENE3D); IPR001283 (PANTHER); TRANSMEMBRANE (PHOBIUS); NON_CYTOPLASMIC_DOMAIN (PHOBIUS); CYTOPLASMIC_DOMAIN (PHOBIUS); IPR014044 (SUPERFAMILY); TMhelix (TMHMM)                                                                                                                                                                                                                       |
| 669 | 394141_length_614_cvg_2.7_tip_1_2  | 11    | prostaglandin-endoperoxide synthase 2            | 204 | 2.37E-92 | 77.40% | 0.106 | IPR019791 (PRINTS); IPR019791 (PFAM); IPR019791 (G3DSA:1.10.640.GENE3D); PTHR11903:SF10 (PANTHER); PTHR11903 (PANTHER); IPR019791 (PROSITE_PROFILES); IPR010255 (SUPERFAMILY)                                                                                                                                                                                                                                                                                           |
| 697 | 402288_length_644_cvg_55.1_tip_1_0 | 2371  | peptidase s8                                     | 205 | 1.07E-17 | 61.00% | 0.301 | IPR007280 (PFAM); TRANSMEMBRANE (PHOBIUS); CYTOPLASMIC_DOMAIN (PHOBIUS); CYTOPLASMIC_DOMAIN (PHOBIUS); TRANSMEMBRANE (PHOBIUS); NON_CYTOPLASMIC_DOMAIN (PHOBIUS); TMhelix (TMHMM); TMhelix (TMHMM)                                                                                                                                                                                                                                                                      |
| 713 | 407048_length_663_cvg_2.9_tip_1_1  | 19    | serine proteinase stubble- partial               | 205 | 2.27E-23 | 64.20% | 0.104 | IPR001254 (SMART); IPR001254 (PFAM); G3DSA:2.40.10.10 (GENE3D); PTHR24265 (PANTHER); IPR018114 (PROSITE_PATTERNS); IPR001254 (PROSITE_PROFILES); IPR009003 (SUPERFAMILY)                                                                                                                                                                                                                                                                                                |
| 670 | 395019_length_617_cvg_3.5_tip_1_0  | 4     | serpin i2                                        | 206 | 4.04E-09 | 66.40% | 0.163 | G3DSA:2.30.39.10 (GENE3D); IPR023796 (PFAM); IPR000215 (PANTHER); PTHR11461:SF52 (PANTHER); IPR023795 (PROSITE_PATTERNS); IPR023796 (SUPERFAMILY)                                                                                                                                                                                                                                                                                                                       |
| 688 | 400532_length_637_cvg_6.5_tip_1_3  | 15    | ---NA---                                         | 206 |          |        | 0.153 | IPR000742 (SMART); IPR023413 (G3DSA:2.40.155.GENE3D); IPR024731 (PFAM); IPR013032 (PROSITE_PATTERNS); IPR000152 (PROSITE_PATTERNS); CYTOPLASMIC_DOMAIN (PHOBIUS); NON_CYTOPLASMIC_DOMAIN (PHOBIUS); TRANSMEMBRANE (PHOBIUS); TRANSMEMBRANE (PHOBIUS); CYTOPLASMIC_DOMAIN (PHOBIUS); TRANSMEMBRANE (PHOBIUS); NON_CYTOPLASMIC_DOMAIN (PHOBIUS); IPR000742 (PROSITE_PROFILES); SSF57196 (SUPERFAMILY); TMhelix (TMHMM); TMhelix (TMHMM); TMhelix (TMHMM); TMhelix (TMHMM) |
| 671 | 395833_length_620_cvg_2.6_tip_1_0  | 7     | isocitrate dehydrogenase                         | 207 | 3.28E-66 | 82.80% | 0.187 | IPR024084 (PFAM); IPR024084 (G3DSA:3.40.718.GENE3D); IPR001804 (PANTHER); PTHR11835:SF42 (PANTHER); SSF53659 (SUPERFAMILY); TMhelix (TMHMM)                                                                                                                                                                                                                                                                                                                             |
| 672 | 395985_length_621_cvg_63.0_tip_1_4 | 339   | probable chitinase 3                             | 207 | 9.80E-54 | 65.30% | 0.222 | IPR011583 (SMART); IPR013781 (G3DSA:3.20.20.GENE3D); IPR001223 (PFAM); PTHR11177:SF112 (PANTHER); PTHR11177 (PANTHER); IPR001579 (PROSITE_PATTERNS); CYTOPLASMIC_DOMAIN (PHOBIUS); TRANSMEMBRANE (PHOBIUS); NON_CYTOPLASMIC_DOMAIN (PHOBIUS); IPR017853 (SUPERFAMILY); TMhelix (TMHMM)                                                                                                                                                                                  |
| 674 | 396271_length_622_cvg_2.0_tip_1_2  | 4     | glutathione peroxidase 6                         | 207 | 2.79E-13 | 67.40% | 0.107 | IPR012336 (G3DSA:3.40.30.GENE3D); PTHR11592:SF21 (PANTHER); IPR000889 (PANTHER); IPR000889 (PROSITE_PROFILES); IPR012336 (SUPERFAMILY); TMhelix (TMHMM)                                                                                                                                                                                                                                                                                                                 |

|     |                                    |    |                                                           |     |           |         |         |                                                                                                                                                                                                                                                                                                                                                                                                                                                |
|-----|------------------------------------|----|-----------------------------------------------------------|-----|-----------|---------|---------|------------------------------------------------------------------------------------------------------------------------------------------------------------------------------------------------------------------------------------------------------------------------------------------------------------------------------------------------------------------------------------------------------------------------------------------------|
| 675 | 397317_length_626_cvg_2.0_tip_1_5  | 6  | leucomyosuppressin precursor                              | 208 | 4.44E-15  | 68.90%  | 0.768 Y | SIGNAL_PEPTIDE_N_REGION (PHOBIUS); SIGNAL_PEPTIDE (PHOBIUS); SIGNAL_PEPTIDE_H_REGION (PHOBIUS); CYTOPLASMIC_DOMAIN (PHOBIUS); NON_CYTOPLASMIC_DOMAIN (PHOBIUS); TRANSMEMBRANE (PHOBIUS); SIGNAL_PEPTIDE_C_REGION (PHOBIUS); NON_CYTOPLASMIC_DOMAIN (PHOBIUS); TRANSMEMBRANE (PHOBIUS); SignalP-TM (SIGNALP_GRAM_POSITIVE); SignalP-noTM (SIGNALP_GRAM_NEGATIVE); SignalP-noTM (SIGNALP_EUK); TMhelix (TMHMM); TMhelix (TMHMM); TMhelix (TMHMM) |
| 696 | 402278_length_644_cvg_10.7_tip_1_5 | 24 | transcription factor sp4-like                             | 208 | 3.71E-72  | 84.20%  | 0.11    | IPR015880 (SMART); PF13465 (PFAM); IPR013087 (G3DSA:3.30.160.GENE3D); IPR013087 (G3DSA:3.30.160.GENE3D); IPR030450 (PANTHER); IPR007087 (PROSITE_PATTERNS); IPR007087 (PROSITE_PATTERNS); IPR007087 (PROSITE_PROFILES); IPR007087 (PROSITE_PROFILES); IPR007087 (PROSITE_PROFILES); SSF57667 (SUPERFAMILY)                                                                                                                                     |
| 676 | 397615_length_627_cvg_3.4_tip_1_3  | 8  | retinol dehydrogenase 13                                  | 209 | 6.33E-66  | 69.70%  | 0.126   | IPR002198 (PRINTS); IPR002347 (PRINTS); IPR016040 (G3DSA:3.40.50.GENE3D); IPR002198 (PFAM); PTHR24320 (PANTHER); SSF51735 (SUPERFAMILY)                                                                                                                                                                                                                                                                                                        |
| 677 | 398396_length_630_cvg_2.0_tip_1_5  | 4  | f-box wd repeat-containing protein 7                      | 210 | 7.27E-111 | 96.90%  | 0.115   | IPR020472 (PRINTS); IPR001680 (SMART); IPR001680 (PFAM); IPR015943 (G3DSA:2.130.10.GENE3D); PTHR22844 (PANTHER); PTHR22844:SF116 (PANTHER); IPR019775 (PROSITE_PATTERNS); IPR019775 (PROSITE_PATTERNS); IPR019775 (PROSITE_PATTERNS); IPR019775 (PROSITE_PATTERNS); IPR017986 (PROSITE_PROFILES); IPR001680 (PROSITE_PROFILES); IPR001680 (PROSITE_PROFILES); IPR001680 (PROSITE_PROFILES); IPR017986 (SUPERFAMILY)                            |
| 678 | 398764_length_631_cvg_4.0_tip_1_5  | 8  | hypothetical protein Y032_0655g1201                       | 210 | 1.11E-45  | 56.20%  | 0.097   | PF13358 (PFAM); PTHR23022:SF64 (PANTHER); PTHR23022 (PANTHER)                                                                                                                                                                                                                                                                                                                                                                                  |
| 679 | 398852_length_632_cvg_3.0_tip_1_2  | 7  | carcinolectin 5b partial                                  | 210 | 6.13E-28  | 72.60%  | 0.108   | IPR002181 (SMART); IPR002181 (PFAM); IPR014715 (G3DSA:4.10.530.GENE3D); PTHR19143 (PANTHER); IPR020837 (PROSITE_PATTERNS); IPR002181 (PROSITE_PROFILES); IPR002181 (SUPERFAMILY)                                                                                                                                                                                                                                                               |
| 681 | 399036_length_632_cvg_3.3_tip_1_2  | 12 | ---NA---                                                  | 210 |           |         | 0.27    | IPR029058 (G3DSA:3.40.50.GENE3D); NON_CYTOPLASMIC_DOMAIN (PHOBIUS); NON_CYTOPLASMIC_DOMAIN (PHOBIUS); TRANSMEMBRANE (PHOBIUS); CYTOPLASMIC_DOMAIN (PHOBIUS); TRANSMEMBRANE (PHOBIUS); TRANSMEMBRANE (PHOBIUS); NON_CYTOPLASMIC_DOMAIN (PHOBIUS); TRANSMEMBRANE (PHOBIUS); CYTOPLASMIC_DOMAIN (PHOBIUS); TMhelix (TMHMM); TMhelix (TMHMM); TMhelix (TMHMM); TMhelix (TMHMM)                                                                     |
| 680 | 398890_length_632_cvg_14.8_tip_1_0 | 23 | protein shifted                                           | 211 | 4.47E-19  | 67.20%  | 0.105   | IPR000742 (SMART); IPR013032 (PFAM); G3DSA:2.170.300.10 (GENE3D); PTHR24838 (PANTHER); PTHR24838:SF276 (PANTHER); IPR013032 (PROSITE_PATTERNS); IPR013032 (PROSITE_PATTERNS); IPR013032 (PROSITE_PATTERNS); IPR013032 (PROSITE_PATTERNS); IPR000742 (PROSITE_PROFILES); IPR000742 (PROSITE_PROFILES); IPR009030 (SUPERFAMILY)                                                                                                                  |
| 683 | 399116_length_632_cvg_4.8_tip_1_4  | 13 | hemocyte protein-glutamine gamma-glutamyltransferase-like | 211 | 7.67E-43  | 71.00%  | 0.122   | IPR013783 (G3DSA:2.60.40.GENE3D); IPR013783 (G3DSA:2.60.40.GENE3D); IPR008958 (PFAM); PTHR11590:SF40 (PANTHER); IPR023608 (PANTHER); IPR008958 (SUPERFAMILY); IPR008958 (SUPERFAMILY)                                                                                                                                                                                                                                                          |
| 684 | 399290_length_633_cvg_2.0_tip_1_3  | 6  | ankyrin repeat domain protein                             | 211 | 7.44E-15  | 57.60%  | 0.107   | IPR002110 (SMART); IPR020683 (PFAM); IPR020683 (G3DSA:1.25.40.GENE3D); PTHR24198 (PANTHER); IPR020683 (PROSITE_PROFILES); IPR002110 (PROSITE_PROFILES); IPR002110 (PROSITE_PROFILES); IPR002110 (PROSITE_PROFILES); IPR020683 (SUPERFAMILY)                                                                                                                                                                                                    |
| 711 | 406510_length_661_cvg_11.6_tip_1_4 | 32 | xanthine dehydrogenase                                    | 211 | 1.16E-67  | 84.40%  | 0.101   | IPR008274 (G3DSA:3.30.365.GENE3D); IPR008274 (PFAM); PTHR11908:SF32 (PANTHER); PTHR11908 (PANTHER); IPR008274 (SUPERFAMILY)                                                                                                                                                                                                                                                                                                                    |
| 685 | 399988_length_636_cvg_6.7_tip_1_3  | 17 | aldehyde oxidase                                          | 212 | 1.94E-17  | 80.90%  | 0.108   | IPR002888 (PFAM); IPR002888 (G3DSA:1.10.150.GENE3D); PTHR11908 (PANTHER); PTHR11908:SF65 (PANTHER); TRANSMEMBRANE (PHOBIUS); NON_CYTOPLASMIC_DOMAIN (PHOBIUS); CYTOPLASMIC_DOMAIN (PHOBIUS); IPR002888 (SUPERFAMILY)                                                                                                                                                                                                                           |
| 686 | 400146_length_636_cvg_5.2_tip_1_3  | 12 | sodium channel protein type 5 subunit alpha               | 212 | 4.72E-09  | 72.80%  | 0.136   | IPR028820 (PTHR10037:PANTHER); PTHR10037 (PANTHER); TRANSMEMBRANE (PHOBIUS); TRANSMEMBRANE (PHOBIUS); CYTOPLASMIC_DOMAIN (PHOBIUS); TRANSMEMBRANE (PHOBIUS); NON_CYTOPLASMIC_DOMAIN (PHOBIUS); NON_CYTOPLASMIC_DOMAIN (PHOBIUS); CYTOPLASMIC_DOMAIN (PHOBIUS); TMhelix (TMHMM); TMhelix (TMHMM); TMhelix (TMHMM)                                                                                                                               |
| 689 | 400548_length_637_cvg_2.0_tip_1_2  | 6  | sugar partial                                             | 212 | 1.42E-155 | 100.00% | 0.103   | IPR013781 (G3DSA:3.20.20.GENE3D); IPR006047 (PFAM); G3DSA:3.90.400.10 (GENE3D); IPR015902 (PANTHER); PTHR10357:SF132 (PANTHER); IPR017853 (SUPERFAMILY)                                                                                                                                                                                                                                                                                        |



|     |                                    |      |                                                       |     |           |        |         |                                                                                                                                                                                                                                                                                                                                                                                                                                              |
|-----|------------------------------------|------|-------------------------------------------------------|-----|-----------|--------|---------|----------------------------------------------------------------------------------------------------------------------------------------------------------------------------------------------------------------------------------------------------------------------------------------------------------------------------------------------------------------------------------------------------------------------------------------------|
| 687 | 400354_length_637_cvg_56.6_tip_0_3 | 120  | phenoloxidase subunit a3                              | 213 | 2.76E-62  | 63.70% | 0.138   | IPR013788 (PRINTS); IPR005204 (PFAM); IPR008922 (G3DSA:1.10.1280.GENE3D); IPR005204 (G3DSA:1.20.1370.GENE3D); IPR000896 (PFAM); PTHR11511:SF4 (PANTHER); IPR013788 (PANTHER); IPR013788 (PROSITE_PATTERNS); IPR005204 (SUPERFAMILY); IPR008922 (SUPERFAMILY)                                                                                                                                                                                 |
| 690 | 400566_length_638_cvg_2.6_tip_1_3  | 7    | circumsporozoite protein                              | 213 | 7.62E-30  | 45.70% | 0.137   | no IPS match                                                                                                                                                                                                                                                                                                                                                                                                                                 |
| 691 | 400566_length_638_cvg_2.6_tip_1_4  | 7    | ---NA---                                              | 213 |           |        | 0.104   | no IPS match                                                                                                                                                                                                                                                                                                                                                                                                                                 |
| 692 | 400664_length_638_cvg_2.8_tip_1_0  | 7    | protein cbg25835                                      | 213 | 3.25E-20  | 57.00% | 0.113   | PTHR23022:SF64 (PANTHER); PTHR23022 (PANTHER)                                                                                                                                                                                                                                                                                                                                                                                                |
| 694 | 401352_length_641_cvg_2.0_tip_1_2  | 7    | mitogen-activated protein kinase kinase kinase 7-like | 213 | 4.40E-47  | 86.50% | 0.374 Y | IPR001245 (PFAM); G3DSA:3.30.200.20 (GENE3D); PTHR23257 (PANTHER); IPR017441 (PROSITE_PATTERNS); SIGNAL_PEPTIDE_C_REGION (PHOBIUS); SIGNAL_PEPTIDE (PHOBIUS); SIGNAL_PEPTIDE_N_REGION (PHOBIUS); SIGNAL_PEPTIDE_H_REGION (PHOBIUS); NON_CYTOPLASMIC_DOMAIN (PHOBIUS); IPR000719 (PROSITE_PROFILES); SignalP-TM (SIGNALP_GRAM_POSITIVE); IPR011009 (SUPERFAMILY)                                                                              |
| 693 | 401270_length_640_cvg_17.4_tip_0_3 | 39   | serine protease 44-like                               | 214 | 4.82E-35  | 77.20% | 0.245   | Coil (COILS); G3DSA:2.40.10.10 (GENE3D); PF11600 (PFAM); IPR001254 (PFAM); PTHR24268:SF95 (PANTHER); PTHR24268 (PANTHER); IPR001254 (PROSITE_PROFILES); IPR009003 (SUPERFAMILY)                                                                                                                                                                                                                                                              |
| 695 | 402128_length_644_cvg_2.2_tip_1_4  | 4    | xanthine dehydrogenase                                | 215 | 1.62E-22  | 90.80% | 0.371 Y | IPR008274 (G3DSA:3.30.365.GENE3D); IPR008274 (PFAM); PTHR11908:SF32 (PANTHER); PTHR11908 (PANTHER); NON_CYTOPLASMIC_DOMAIN (PHOBIUS); CYTOPLASMIC_DOMAIN (PHOBIUS); TRANSMEMBRANE (PHOBIUS); NON_CYTOPLASMIC_DOMAIN (PHOBIUS); TRANSMEMBRANE (PHOBIUS); IPR008274 (SUPERFAMILY); TMhelix (TMHMM); TMhelix (TMHMM)                                                                                                                            |
| 698 | 402434_length_645_cvg_2.6_tip_1_0  | 6    | gastrula zinc finger                                  | 215 | 2.42E-24  | 61.30% | 0.103   | IPR015880 (SMART); IPR013087 (G3DSA:3.30.160.GENE3D); PF13465 (PFAM); IPR013087 (G3DSA:3.30.160.GENE3D); PF13894 (PFAM); PTHR24409 (PANTHER); IPR007087 (PROSITE_PATTERNS); IPR007087 (PROSITE_PATTERNS); IPR007087 (PROSITE_PATTERNS); IPR007087 (PROSITE_PATTERNS); IPR007087 (PROSITE_PROFILES); IPR007087 (PROSITE_PROFILES); IPR007087 (PROSITE_PROFILES); IPR007087 (PROSITE_PROFILES); SSF57667 (SUPERFAMILY); SSF57667 (SUPERFAMILY) |
| 699 | 402960_length_647_cvg_4.1_tip_1_0  | 10   | clotting factor partial                               | 216 | 8.72E-25  | 63.90% | 0.248   | IPR001254 (SMART); G3DSA:2.40.10.10 (GENE3D); IPR001254 (PFAM); PTHR24265 (PANTHER); IPR001254 (PROSITE_PROFILES); IPR009003 (SUPERFAMILY)                                                                                                                                                                                                                                                                                                   |
| 700 | 403058_length_648_cvg_2.9_tip_1_3  | 7    | hypothetical protein Y032_0001g415                    | 216 | 2.20E-45  | 57.80% | 0.114   | PF13358 (PFAM); PTHR23022 (PANTHER); PTHR23022:SF64 (PANTHER)                                                                                                                                                                                                                                                                                                                                                                                |
| 701 | 403364_length_649_cvg_5.3_tip_1_2  | 6    | alcohol dehydrogenase                                 | 216 | 2.67E-16  | 69.90% | 0.128   | IPR023210 (G3DSA:3.20.20.GENE3D); PTHR11732:SF183 (PANTHER); IPR001395 (PANTHER); NON_CYTOPLASMIC_DOMAIN (PHOBIUS); TRANSMEMBRANE (PHOBIUS); NON_CYTOPLASMIC_DOMAIN (PHOBIUS); CYTOPLASMIC_DOMAIN (PHOBIUS); TRANSMEMBRANE (PHOBIUS); IPR023210 (SUPERFAMILY); TMhelix (TMHMM)                                                                                                                                                               |
| 702 | 403658_length_650_cvg_2.8_tip_1_5  | 7    | glucose dehydrogenase                                 | 216 | 1.91E-51  | 64.10% | 0.127   | IPR000172 (PFAM); G3DSA:3.50.50.60 (GENE3D); PTHR11552:SF77 (PANTHER); PTHR11552 (PANTHER); IPR000172 (PROSITE_PATTERNS); SSF51905 (SUPERFAMILY); SSF54373 (SUPERFAMILY)                                                                                                                                                                                                                                                                     |
| 721 | 408426_length_669_cvg_7.5_tip_1_5  | 19   | ---NA---                                              | 216 |           |        | 0.111   | G3DSA:2.40.10.10 (GENE3D); NON_CYTOPLASMIC_DOMAIN (PHOBIUS); TRANSMEMBRANE (PHOBIUS); TRANSMEMBRANE (PHOBIUS); CYTOPLASMIC_DOMAIN (PHOBIUS); CYTOPLASMIC_DOMAIN (PHOBIUS); IPR009003 (SUPERFAMILY); TMhelix (TMHMM)                                                                                                                                                                                                                          |
| 703 | 404582_length_653_cvg_6.5_tip_1_5  | 21   | multiple ankyrin repeats single kh domain             | 217 | 3.67E-74  | 90.60% | 0.135   | Coil (COILS); IPR002110 (SMART); IPR020683 (PFAM); IPR020683 (G3DSA:1.25.40.GENE3D); PTHR23206 (PANTHER); PTHR23206:SF4 (PANTHER); IPR020683 (PROSITE_PROFILES); IPR002110 (PROSITE_PROFILES); IPR020683 (SUPERFAMILY)                                                                                                                                                                                                                       |
| 704 | 404856_length_654_cvg_4.3_tip_1_5  | 14   | 5 -nucleotidase                                       | 218 | 8.15E-72  | 82.80% | 0.111   | IPR029052 (G3DSA:3.60.21.GENE3D); PTHR11575:SF7 (PANTHER); IPR006179 (PANTHER); IPR029052 (SUPERFAMILY)                                                                                                                                                                                                                                                                                                                                      |
| 722 | 408538_length_669_cvg_91.4_tip_0_0 | 5878 | c-type lectin                                         | 218 | 6.33E-33  | 51.70% | 0.13    | IPR002557 (SMART); IPR002557 (G3DSA:2.170.140.GENE3D); IPR013781 (G3DSA:3.20.20.GENE3D); IPR001223 (PFAM); IPR002557 (PFAM); PTHR11177 (PANTHER); PTHR11177:SF112 (PANTHER); IPR002557 (PROSITE_PROFILES); IPR002557 (SUPERFAMILY); IPR017853 (SUPERFAMILY)                                                                                                                                                                                  |
| 734 | 412054_length_685_cvg_5.7_tip_1_3  | 17   | protein disulfide                                     | 218 | 1.53E-109 | 79.70% | 0.106   | PR00421 (PRINTS); IPR013766 (PFAM); IPR012336 (G3DSA:3.40.30.GENE3D); IPR012336 (G3DSA:3.40.30.GENE3D); PTHR18929:SF85 (PANTHER); PTHR18929 (PANTHER); IPR012336 (PROSITE_PROFILES); IPR012336 (SUPERFAMILY); IPR012336 (SUPERFAMILY)                                                                                                                                                                                                        |
| 705 | 405384_length_656_cvg_81.8_tip_1_1 | 1287 | hornerin isoform x2                                   | 219 | 1.47E-29  | 50.20% | 0.123   | IPR001314 (PRINTS); IPR001254 (SMART); G3DSA:2.40.10.10 (GENE3D); G3DSA:2.40.10.10 (GENE3D); IPR001254 (PFAM); G3DSA:2.40.10.10 (GENE3D); PTHR24268 (PANTHER); IPR001254 (PROSITE_PROFILES); IPR009003 (SUPERFAMILY)                                                                                                                                                                                                                         |



|     |                                     |        |                                                      |     |           |        |         |                                                                                                                                                                                                                                                                                                                                                                                                                                                                                                                                                                                    |
|-----|-------------------------------------|--------|------------------------------------------------------|-----|-----------|--------|---------|------------------------------------------------------------------------------------------------------------------------------------------------------------------------------------------------------------------------------------------------------------------------------------------------------------------------------------------------------------------------------------------------------------------------------------------------------------------------------------------------------------------------------------------------------------------------------------|
| 706 | 405648_length_658_cvg_10.2_tip_1_4  | 28     | gamma-interferon-inducible lysosomal thiol reductase | 219 | 1.40E-19  | 58.20% | 0.255   | IPR004911 (PFAM); IPR004911 (PANTHER); PTHR13234:SF8 (PANTHER)                                                                                                                                                                                                                                                                                                                                                                                                                                                                                                                     |
| 732 | 411764_length_684_cvg_5.3_tip_1_4   | 17     | zinc finger protein partial                          | 219 | 1.54E-23  | 59.20% | 0.128   | IPR015880 (SMART); IPR013087 (G3DSA:3.30.160.GENE3D); PF13465 (PFAM); IPR013087 (G3DSA:3.30.160.GENE3D); IPR013087 (G3DSA:3.30.160.GENE3D); PTHR24409 (PANTHER); PTHR24409:SF13 (PANTHER); IPR007087 (PROSITE_PATTERNS); IPR007087 (PROSITE_PATTERNS); IPR007087 (PROSITE_PATTERNS); IPR007087 (PROSITE_PROFILES); IPR007087 (PROSITE_PROFILES); IPR007087 (PROSITE_PROFILES); SSF57667 (SUPERFAMILY); SSF57667 (SUPERFAMILY)                                                                                                                                                      |
| 707 | 406110_length_659_cvg_2.6_tip_1_0   | 7      | hsp70 family protein                                 | 220 | 1.51E-157 | 99.90% | 0.131   | IPR013126 (PRINTS); IPR013126 (PFAM); G3DSA:3.30.420.40 (GENE3D); IPR029047 (G3DSA:2.60.34.GENE3D); PTHR19375:SF151 (PANTHER); PTHR19375 (PANTHER); IPR018181 (PROSITE_PATTERNS); IPR029047 (SUPERFAMILY); SSF53067 (SUPERFAMILY)                                                                                                                                                                                                                                                                                                                                                  |
| 708 | 406298_length_660_cvg_2.0_tip_1_5   | 5      | twitchin- partial                                    | 220 | 9.81E-99  | 80.80% | 0.113   | IPR003599 (SMART); IPR003598 (SMART); IPR013098 (PFAM); IPR003961 (PFAM); IPR013783 (G3DSA:2.60.40.GENE3D); IPR013783 (G3DSA:2.60.40.GENE3D); PTHR19897 (PANTHER); PTHR19897:SF155 (PANTHER); IPR007110 (PROSITE_PROFILES); IPR003961 (PROSITE_PROFILES); IPR003961 (SUPERFAMILY); SSF48726 (SUPERFAMILY)                                                                                                                                                                                                                                                                          |
| 710 | 406388_length_661_cvg_3.7_tip_1_2   | 12     | zinc finger protein                                  | 220 | 8.53E-29  | 57.60% | 0.098   | IPR015880 (SMART); IPR013087 (G3DSA:3.30.160.GENE3D); IPR013087 (G3DSA:3.30.160.GENE3D); IPR013087 (G3DSA:3.30.160.GENE3D); IPR013087 (G3DSA:3.30.160.GENE3D); PF13465 (PFAM); PTHR24409 (PANTHER); PTHR24409:SF14 (PANTHER); IPR007087 (PROSITE_PATTERNS); IPR007087 (PROSITE_PATTERNS); IPR007087 (PROSITE_PATTERNS); IPR007087 (PROSITE_PATTERNS); IPR007087 (PROSITE_PROFILES); IPR007087 (PROSITE_PROFILES); IPR007087 (PROSITE_PROFILES); IPR007087 (PROSITE_PROFILES); IPR007087 (PROSITE_PROFILES); SSF57667 (SUPERFAMILY); SSF57667 (SUPERFAMILY); SSF57667 (SUPERFAMILY) |
| 712 | 406790_length_662_cvg_2.0_tip_1_5   | 7      | zinc finger and scan domain-containing protein 22    | 220 | 1.55E-32  | 55.20% | 0.102   | IPR015880 (SMART); IPR013087 (G3DSA:3.30.160.GENE3D); IPR013087 (G3DSA:3.30.160.GENE3D); PF13894 (PFAM); PF13465 (PFAM); PTHR24409 (PANTHER); PTHR24409:SF14 (PANTHER); IPR007087 (PROSITE_PATTERNS); IPR007087 (PROSITE_PATTERNS); IPR007087 (PROSITE_PATTERNS); IPR007087 (PROSITE_PATTERNS); IPR007087 (PROSITE_PROFILES); IPR007087 (PROSITE_PROFILES); IPR007087 (PROSITE_PROFILES); IPR007087 (PROSITE_PROFILES); SSF57667 (SUPERFAMILY); SSF57667 (SUPERFAMILY); SSF57667 (SUPERFAMILY)                                                                                     |
| 709 | 406376_length_661_cvg_100.9_tip_0_3 | 160937 | low-density lipoprotein receptor-related protein 2   | 221 | 8.70E-37  | 59.10% | 0.109   | IPR002172 (PRINTS); IPR002172 (SMART); IPR002172 (G3DSA:4.10.400.GENE3D); IPR002172 (PFAM); PTHR10529 (PANTHER); IPR023415 (PROSITE_PATTERNS); IPR023415 (PROSITE_PATTERNS); IPR023415 (PROSITE_PATTERNS); IPR002172 (PROSITE_PATTERNS); IPR002172 (PROSITE_PROFILES); IPR002172 (PROSITE_PROFILES); IPR002172 (PROSITE_PROFILES); IPR009003 (SUPERFAMILY); IPR002172 (SUPERFAMILY); IPR002172 (SUPERFAMILY); IPR002172 (SUPERFAMILY)                                                                                                                                              |
| 714 | 407216_length_664_cvg_2.0_tip_1_4   | 6      | acyloxyacyl hydrolase                                | 221 | 4.95E-70  | 64.30% | 0.11    | IPR001087 (PFAM); IPR013830 (G3DSA:3.40.50.GENE3D); PTHR15010 (PANTHER); IPR013830 (SUPERFAMILY)                                                                                                                                                                                                                                                                                                                                                                                                                                                                                   |
| 716 | 407286_length_664_cvg_3.3_tip_1_4   | 11     | semaphorin-1a isoform x1                             | 221 | 1.37E-12  | 89.10% | 0.356 Y | IPR015943 (G3DSA:2.130.10.GENE3D); IPR001627 (PFAM); IPR027231 (PANTHER); PTHR11036:SF66 (PANTHER); NON_CYTOPLASMIC_DOMAIN (PHOBIUS); CYTOPLASMIC_DOMAIN (PHOBIUS); CYTOPLASMIC_DOMAIN (PHOBIUS); TRANSMEMBRANE (PHOBIUS); TRANSMEMBRANE (PHOBIUS); IPR001627 (SUPERFAMILY); TMhelix (TMHMM); TMhelix (TMHMM)                                                                                                                                                                                                                                                                      |
| 715 | 407234_length_664_cvg_63.2_tip_1_3  | 347    | macrophage migration inhibitory factor               | 222 | 2.37E-39  | 69.80% | 0.135   | IPR001398 (PFAM); G3DSA:3.30.429.10 (GENE3D); IPR001398 (PANTHER); PTHR11954:SF6 (PANTHER); IPR001398 (PRODOM); IPR014347 (SUPERFAMILY)                                                                                                                                                                                                                                                                                                                                                                                                                                            |
| 717 | 407458_length_665_cvg_10.9_tip_1_4  | 24     | maguk p55 subfamily member partial                   | 222 | 3.06E-23  | 87.60% | 0.248   | Coil (COILS); IPR027417 (G3DSA:3.40.50.GENE3D); PTHR23122:SF32 (PANTHER); PTHR23122 (PANTHER); CYTOPLASMIC_DOMAIN (PHOBIUS); TRANSMEMBRANE (PHOBIUS); TRANSMEMBRANE (PHOBIUS); TRANSMEMBRANE (PHOBIUS); CYTOPLASMIC_DOMAIN (PHOBIUS); NON_CYTOPLASMIC_DOMAIN (PHOBIUS); NON_CYTOPLASMIC_DOMAIN (PHOBIUS); IPR027417 (SUPERFAMILY); TMhelix (TMHMM)                                                                                                                                                                                                                                 |





|     |                                    |        |                                                          |     |           |        |       |                                                                                                                                                                                                                                                                                                                                                                                                                                                                                                                                                                                                                                                                            |
|-----|------------------------------------|--------|----------------------------------------------------------|-----|-----------|--------|-------|----------------------------------------------------------------------------------------------------------------------------------------------------------------------------------------------------------------------------------------------------------------------------------------------------------------------------------------------------------------------------------------------------------------------------------------------------------------------------------------------------------------------------------------------------------------------------------------------------------------------------------------------------------------------------|
| 748 | 415401_length_701_cvg_78.9_tip_1_3 | 812    | myophilin-like isoform 2                                 | 234 | 5.07E-100 | 85.00% | 0.103 | IPR003096 (PRINTS); IPR001715 (SMART); IPR001715 (PFAM); IPR001715 (G3DSA:1.10.418.GENE3D); PTHR18959 (PANTHER); IPR000557 (PROSITE_PATTERNS); IPR000557 (PROSITE_PROFILES); IPR001715 (PROSITE_PROFILES); IPR001715 (SUPERFAMILY)                                                                                                                                                                                                                                                                                                                                                                                                                                         |
| 749 | 415499_length_702_cvg_47.8_tip_1_1 | 117    | a-kinase anchor protein partial                          | 234 | 1.01E-21  | 56.50% | 0.098 | Coil (COILS)                                                                                                                                                                                                                                                                                                                                                                                                                                                                                                                                                                                                                                                               |
| 752 | 415927_length_704_cvg_3.0_tip_1_2  | 12     | wnt10 protein                                            | 234 | 3.04E-34  | 80.60% | 0.13  | IPR005817 (PFAM); PTHR12027:SF89 (PANTHER); IPR005817 (PANTHER)                                                                                                                                                                                                                                                                                                                                                                                                                                                                                                                                                                                                            |
| 777 | 421213_length_729_cvg_3.2_tip_1_2  | 13     | zinc finger protein                                      | 234 | 1.79E-31  | 57.30% | 0.107 | IPR015880 (SMART); IPR013087 (G3DSA:3.30.160.GENE3D); PF13465 (PFAM); PF13912 (PFAM); PF13894 (PFAM); PTHR24409 (PANTHER); PTHR24409:SF14 (PANTHER); IPR007087 (PROSITE_PATTERNS); IPR007087 (PROSITE_PATTERNS); IPR007087 (PROSITE_PATTERNS); IPR007087 (PROSITE_PROFILES); IPR007087 (PROSITE_PROFILES); IPR007087 (PROSITE_PROFILES); IPR007087 (PROSITE_PROFILES); IPR007087 (PROSITE_PROFILES); SSF57667 (SUPERFAMILY); SSF57667 (SUPERFAMILY); SSF57667 (SUPERFAMILY)                                                                                                                                                                                                |
| 751 | 415791_length_703_cvg_8.1_tip_1_0  | 21     | zinc finger protein                                      | 235 | 2.61E-54  | 69.70% | 0.098 | IPR015880 (SMART); IPR013087 (G3DSA:3.30.160.GENE3D); PF13465 (PFAM); IPR013087 (G3DSA:3.30.160.GENE3D); IPR013087 (G3DSA:3.30.160.GENE3D); IPR013087 (G3DSA:3.30.160.GENE3D); PTHR24409 (PANTHER); IPR007087 (PROSITE_PATTERNS); IPR007087 (PROSITE_PATTERNS); IPR007087 (PROSITE_PATTERNS); IPR007087 (PROSITE_PATTERNS); NON_CYTOPLASMIC_DOMAIN (PHOBIUS); CYTOPLASMIC_DOMAIN (PHOBIUS); TRANSMEMBRANE (PHOBIUS); IPR007087 (PROSITE_PROFILES); IPR007087 (PROSITE_PROFILES); IPR007087 (PROSITE_PROFILES); IPR007087 (PROSITE_PROFILES); IPR007087 (PROSITE_PROFILES); SSF57667 (SUPERFAMILY); SSF57667 (SUPERFAMILY); SSF57667 (SUPERFAMILY)                          |
| 753 | 415949_length_704_cvg_82.8_tip_1_1 | 946    | serine protease 27-like                                  | 235 | 1.65E-43  | 54.80% | 0.116 | IPR001314 (PRINTS); IPR001254 (SMART); IPR001254 (PFAM); G3DSA:2.40.10.10 (GENE3D); G3DSA:2.40.10.10 (GENE3D); G3DSA:2.40.10.10 (GENE3D); PTHR24268 (PANTHER); IPR018114 (PROSITE_PATTERNS); IPR018114 (PROSITE_PATTERNS); IPR001254 (PROSITE_PROFILES); IPR009003 (SUPERFAMILY)                                                                                                                                                                                                                                                                                                                                                                                           |
| 754 | 415953_length_704_cvg_2.7_tip_1_1  | 9      | ganglioside-induced differentiation-associated protein 2 | 235 | 3.28E-56  | 70.70% | 0.252 | IPR002589 (SMART); IPR002589 (PFAM); G3DSA:3.40.220.10 (GENE3D); PTHR11106 (PANTHER); PTHR11106:SF59 (PANTHER); CYTOPLASMIC_DOMAIN (PHOBIUS); TRANSMEMBRANE (PHOBIUS); NON_CYTOPLASMIC_DOMAIN (PHOBIUS); IPR002589 (PROSITE_PROFILES); SSF52949 (SUPERFAMILY)                                                                                                                                                                                                                                                                                                                                                                                                              |
| 755 | 416033_length_704_cvg_5.7_tip_1_3  | 16     | zinc finger protein 850-like                             | 235 | 7.97E-41  | 59.00% | 0.098 | IPR015880 (SMART); IPR013087 (G3DSA:3.30.160.GENE3D); IPR013087 (G3DSA:3.30.160.GENE3D); IPR013087 (G3DSA:3.30.160.GENE3D); PF13465 (PFAM); IPR007087 (PFAM); IPR013087 (G3DSA:3.30.160.GENE3D); PF13894 (PFAM); PTHR24409 (PANTHER); PTHR24409:SF13 (PANTHER); IPR007087 (PROSITE_PATTERNS); IPR007087 (PROSITE_PATTERNS); IPR007087 (PROSITE_PATTERNS); IPR007087 (PROSITE_PATTERNS); IPR007087 (PROSITE_PROFILES); IPR007087 (PROSITE_PROFILES); IPR007087 (PROSITE_PROFILES); IPR007087 (PROSITE_PROFILES); IPR007087 (PROSITE_PROFILES); IPR007087 (PROSITE_PROFILES); SSF57667 (SUPERFAMILY); SSF57667 (SUPERFAMILY); SSF57667 (SUPERFAMILY); SSF57667 (SUPERFAMILY) |
| 756 | 416121_length_705_cvg_2.0_tip_1_4  | 6      | adhesive serine protease                                 | 235 | 2.89E-26  | 67.30% | 0.12  | IPR001254 (SMART); G3DSA:2.40.10.10 (GENE3D); IPR001254 (PFAM); PTHR24256 (PANTHER); IPR018114 (PROSITE_PATTERNS); IPR001254 (PROSITE_PROFILES); IPR009003 (SUPERFAMILY)                                                                                                                                                                                                                                                                                                                                                                                                                                                                                                   |
| 757 | 416121_length_705_cvg_2.0_tip_1_5  | 6      | trypsin- partial                                         | 235 | 5.87E-12  | 73.40% | 0.15  | G3DSA:2.40.10.10 (GENE3D); IPR001254 (PFAM); PTHR24258:SF4 (PANTHER); PTHR24258 (PANTHER); IPR009003 (SUPERFAMILY)                                                                                                                                                                                                                                                                                                                                                                                                                                                                                                                                                         |
| 758 | 416133_length_705_cvg_68.3_tip_0_1 | 128445 | chitinase partial                                        | 235 | 9.04E-60  | 63.30% | 0.106 | IPR011583 (SMART); IPR001223 (PFAM); IPR013781 (G3DSA:3.20.20.GENE3D); IPR029070 (G3DSA:3.10.50.GENE3D); PTHR11177 (PANTHER); IPR017853 (SUPERFAMILY); IPR029070 (SUPERFAMILY)                                                                                                                                                                                                                                                                                                                                                                                                                                                                                             |

|     |                                    |      |                                                        |     |           |        |         |                                                                                                                                                                                                                                                                                                                                                                                                                                                                                                                                                                                                                                       |
|-----|------------------------------------|------|--------------------------------------------------------|-----|-----------|--------|---------|---------------------------------------------------------------------------------------------------------------------------------------------------------------------------------------------------------------------------------------------------------------------------------------------------------------------------------------------------------------------------------------------------------------------------------------------------------------------------------------------------------------------------------------------------------------------------------------------------------------------------------------|
| 805 | 425325_length_749_cvg_4.2_tip_1_5  | 13   | zinc finger protein 226-like                           | 235 | 8.23E-33  | 60.20% | 0.123   | IPR015880 (SMART); PF13465 (PFAM); IPR013087 (G3DSA:3.30.160.GENE3D); IPR013087 (G3DSA:3.30.160.GENE3D); IPR007087 (PFAM); IPR013087 (G3DSA:3.30.160.GENE3D); IPR013087 (G3DSA:3.30.160.GENE3D); PTHR24409 (PANTHER); IPR007087 (PROSITE_PATTERNS); IPR007087 (PROSITE_PATTERNS); IPR007087 (PROSITE_PATTERNS); IPR007087 (PROSITE_PATTERNS); TRANSMEMBRANE (PHOBIUS); CYTOPLASMIC_DOMAIN (PHOBIUS); NON_CYTOPLASMIC_DOMAIN (PHOBIUS); IPR007087 (PROSITE_PROFILES); IPR007087 (PROSITE_PROFILES); IPR007087 (PROSITE_PROFILES); IPR007087 (PROSITE_PROFILES); SSF57667 (SUPERFAMILY); SSF57667 (SUPERFAMILY); SSF57667 (SUPERFAMILY) |
| 759 | 416639_length_707_cvg_2.0_tip_1_3  | 7    | proclotting enzyme                                     | 236 | 3.44E-20  | 76.50% | 0.122   | IPR001254 (PFAM); G3DSA:2.40.10.10 (GENE3D); PTHR24265 (PANTHER); IPR018114 (PROSITE_PATTERNS); NON_CYTOPLASMIC_DOMAIN (PHOBIUS); TRANSMEMBRANE (PHOBIUS); CYTOPLASMIC_DOMAIN (PHOBIUS); IPR001254 (PROSITE_PROFILES); IPR009003 (SUPERFAMILY); TMhelix (TMHMM)                                                                                                                                                                                                                                                                                                                                                                       |
| 760 | 417027_length_709_cvg_4.0_tip_1_5  | 14   | peptidyl-prolyl cis-trans isomerase-like 4             | 236 | 3.15E-76  | 84.20% | 0.108   | IPR002130 (PRINTS); IPR002130 (PFAM); IPR029000 (G3DSA:2.40.100.GENE3D); PTHR11071:SF156 (PANTHER); IPR024936 (PANTHER); IPR002130 (PROSITE_PROFILES); IPR029000 (SUPERFAMILY)                                                                                                                                                                                                                                                                                                                                                                                                                                                        |
| 762 | 417143_length_709_cvg_2.2_tip_1_2  | 6    | twitchin isoform x4                                    | 236 | 2.40E-116 | 85.60% | 0.199   | PR00014 (PRINTS); IPR003961 (SMART); IPR003961 (PFAM); IPR013783 (G3DSA:2.60.40.GENE3D); IPR013783 (G3DSA:2.60.40.GENE3D); IPR013783 (G3DSA:2.60.40.GENE3D); IPR013098 (PFAM); PTHR19897 (PANTHER); PTHR19897:SF142 (PANTHER); IPR003961 (PROSITE_PROFILES); SSF48726 (SUPERFAMILY); IPR003961 (SUPERFAMILY); SSF48726 (SUPERFAMILY)                                                                                                                                                                                                                                                                                                  |
| 763 | 417373_length_710_cvg_3.5_tip_1_2  | 13   | trypsin 3                                              | 236 | 1.84E-32  | 63.40% | 0.125   | IPR001254 (SMART); G3DSA:2.40.10.10 (GENE3D); IPR001254 (PFAM); PTHR24260 (PANTHER); TRANSMEMBRANE (PHOBIUS); NON_CYTOPLASMIC_DOMAIN (PHOBIUS); TRANSMEMBRANE (PHOBIUS); CYTOPLASMIC_DOMAIN (PHOBIUS); CYTOPLASMIC_DOMAIN (PHOBIUS); IPR001254 (PROSITE_PROFILES); IPR009003 (SUPERFAMILY); TMhelix (TMHMM); TMhelix (TMHMM)                                                                                                                                                                                                                                                                                                          |
| 761 | 417119_length_709_cvg_2.5_tip_1_3  | 11   | epidermal growth factor-like protein 7                 | 237 | 1.29E-29  | 49.90% | 0.117   | Coil (COILS); Coil (COILS); IPR001881 (SMART); IPR000742 (SMART); IPR001881 (PFAM); G3DSA:2.10.25.10 (GENE3D); G3DSA:2.10.25.10 (GENE3D); IPR000742 (PFAM); PTHR14949 (PANTHER); PTHR14949:SF14 (PANTHER); IPR000152 (PROSITE_PATTERNS); IPR013032 (PROSITE_PATTERNS); IPR018097 (PROSITE_PATTERNS); IPR013032 (PROSITE_PATTERNS); IPR013032 (PROSITE_PATTERNS); IPR000742 (PROSITE_PROFILES); IPR000742 (PROSITE_PROFILES); SSF57196 (SUPERFAMILY); SSF57196 (SUPERFAMILY)                                                                                                                                                           |
| 764 | 417581_length_711_cvg_4.3_tip_1_3  | 16   | proprotein convertase subtilisin kexin type 7          | 237 | 4.37E-68  | 58.50% | 0.645 Y | IPR002884 (PFAM); IPR008979 (G3DSA:2.60.120.GENE3D); PTHR10795:SF9 (PANTHER); IPR015500 (PANTHER); SignalP-noTM (SIGNALP_EUK); IPR008979 (SUPERFAMILY)                                                                                                                                                                                                                                                                                                                                                                                                                                                                                |
| 765 | 417847_length_712_cvg_4.3_tip_1_0  | 14   | sortilin-related receptor                              | 238 | 1.41E-17  | 80.70% | 0.739 Y | G3DSA:2.130.10.140 (GENE3D); PTHR12106 (PANTHER); PTHR12106:SF7 (PANTHER); SIGNAL_PEPTIDE_N_REGION (PHOBIUS); SIGNAL_PEPTIDE_H_REGION (PHOBIUS); SIGNAL_PEPTIDE (PHOBIUS); NON_CYTOPLASMIC_DOMAIN (PHOBIUS); SIGNAL_PEPTIDE_C_REGION (PHOBIUS); SignalP-noTM (SIGNALP_EUK); SSF110296 (SUPERFAMILY); TMhelix (TMHMM)                                                                                                                                                                                                                                                                                                                  |
| 766 | 418055_length_713_cvg_2.0_tip_1_4  | 6    | tyrosine-protein kinase receptor tie-1-like isoform x1 | 238 | 2.03E-09  | 63.30% | 0.114   | G3DSA:2.10.25.10 (GENE3D); IPR013032 (PROSITE_PATTERNS); IPR013032 (PROSITE_PATTERNS); NON_CYTOPLASMIC_DOMAIN (PHOBIUS); TRANSMEMBRANE (PHOBIUS); CYTOPLASMIC_DOMAIN (PHOBIUS); IPR000742 (PROSITE_PROFILES)                                                                                                                                                                                                                                                                                                                                                                                                                          |
| 768 | 418611_length_716_cvg_5.7_tip_1_1  | 15   | probable nuclear transport factor 2 isoform x1         | 239 | 2.37E-63  | 81.90% | 0.138   | G3DSA:3.10.450.50 (GENE3D); IPR002075 (PFAM); PTHR12612 (PANTHER); IPR018222 (PROSITE_PROFILES); SSF54427 (SUPERFAMILY)                                                                                                                                                                                                                                                                                                                                                                                                                                                                                                               |
| 769 | 418797_length_717_cvg_2.2_tip_1_0  | 9    | limbic system-associated membrane protein              | 239 | 3.71E-92  | 68.40% | 0.1     | IPR003961 (SMART); IPR003599 (SMART); IPR003598 (SMART); IPR013783 (G3DSA:2.60.40.GENE3D); IPR013783 (G3DSA:2.60.40.GENE3D); IPR003961 (PFAM); IPR013783 (G3DSA:2.60.40.GENE3D); IPR013098 (PFAM); PF13895 (PFAM); PTHR19831:SF40 (PANTHER); PTHR19831 (PANTHER); IPR003961 (PROSITE_PROFILES); IPR007110 (PROSITE_PROFILES); SSF48726 (SUPERFAMILY); SSF48726 (SUPERFAMILY); IPR003961 (SUPERFAMILY)                                                                                                                                                                                                                                 |
| 770 | 418907_length_717_cvg_63.6_tip_1_4 | 5047 | granulins- partial                                     | 239 | 3.40E-36  | 53.10% | 0.626 Y | IPR000118 (SMART); IPR000118 (PFAM); PTHR12274 (PANTHER); PTHR12274:SF1 (PANTHER); IPR000118 (PROSITE_PATTERNS); IPR000118 (PROSITE_PATTERNS); CYTOPLASMIC_DOMAIN (PHOBIUS); NON_CYTOPLASMIC_DOMAIN (PHOBIUS); TRANSMEMBRANE (PHOBIUS); SignalP-noTM (SIGNALP_EUK); SSF57277 (SUPERFAMILY); SSF57277 (SUPERFAMILY); TMhelix (TMHMM)                                                                                                                                                                                                                                                                                                   |







|     |                                    |     |                                                          |     |          |        |       |                                                                                                                                                                                                                                                                                                                                                                                                                                                                                                                                  |
|-----|------------------------------------|-----|----------------------------------------------------------|-----|----------|--------|-------|----------------------------------------------------------------------------------------------------------------------------------------------------------------------------------------------------------------------------------------------------------------------------------------------------------------------------------------------------------------------------------------------------------------------------------------------------------------------------------------------------------------------------------|
| 783 | 422189_length_734_cvg_3.6_tip_1_1  | 17  | transcription factor e4f1-like                           | 245 | 4.47E-17 | 75.90% | 0.103 | IPR015880 (SMART); IPR013087 (G3DSA:3.30.160.GENE3D); PF13465 (PFAM); IPR013087 (G3DSA:3.30.160.GENE3D); PTHR24409 (PANTHER); IPR007087 (PROSITE_PATTERNS); IPR007087 (PROSITE_PATTERNS); IPR007087 (PROSITE_PROFILES); IPR007087 (PROSITE_PROFILES); SSF57667 (SUPERFAMILY)                                                                                                                                                                                                                                                     |
| 784 | 422293_length_734_cvg_21.3_tip_1_0 | 69  | gastrula zinc finger protein                             | 245 | 1.25E-30 | 57.00% | 0.105 | IPR015880 (SMART); IPR013087 (G3DSA:3.30.160.GENE3D); IPR013087 (G3DSA:3.30.160.GENE3D); PF13465 (PFAM); PF13912 (PFAM); PTHR24409 (PANTHER); IPR007087 (PROSITE_PATTERNS); IPR007087 (PROSITE_PATTERNS); IPR007087 (PROSITE_PATTERNS); IPR007087 (PROSITE_PATTERNS); IPR007087 (PROSITE_PATTERNS); IPR007087 (PROSITE_PROFILES); IPR007087 (PROSITE_PROFILES); IPR007087 (PROSITE_PROFILES); IPR007087 (PROSITE_PROFILES); IPR007087 (PROSITE_PROFILES); SSF57667 (SUPERFAMILY); SSF57667 (SUPERFAMILY); SSF57667 (SUPERFAMILY) |
| 786 | 422487_length_735_cvg_3.2_tip_1_4  | 14  | down syndrome cell adhesion molecule-like protein dscam2 | 245 | 7.82E-20 | 63.90% | 0.18  | IPR003598 (SMART); IPR003599 (SMART); IPR013098 (PFAM); IPR013783 (G3DSA:2.60.40.GENE3D); PTHR10489 (PANTHER); PTHR10489:SF580 (PANTHER); NON_CYTOPLASMIC_DOMAIN (PHOBIUS); CYTOPLASMIC_DOMAIN (PHOBIUS); TRANSMEMBRANE (PHOBIUS); IPR007110 (PROSITE_PROFILES); SSF48726 (SUPERFAMILY); TMhelix (TMHMM)                                                                                                                                                                                                                         |
| 787 | 422715_length_737_cvg_2.0_tip_1_2  | 7   | protein kinase c-binding protein nell1-like isoform x2   | 245 | 1.05E-58 | 61.80% | 0.107 | IPR001007 (SMART); G3DSA:2.10.70.10 (GENE3D); IPR001007 (PFAM); PTHR24042 (PANTHER); PTHR24042:SF4 (PANTHER); IPR001007 (PROSITE_PATTERNS); IPR001007 (PROSITE_PROFILES); IPR001007 (PROSITE_PROFILES); SSF57603 (SUPERFAMILY); SSF57603 (SUPERFAMILY)                                                                                                                                                                                                                                                                           |
| 788 | 422727_length_737_cvg_4.2_tip_1_3  | 9   | serrate partial                                          | 246 | 3.80E-28 | 77.60% | 0.285 | IPR000742 (SMART); IPR001881 (SMART); G3DSA:2.10.25.10 (GENE3D); IPR000742 (PFAM); G3DSA:2.10.25.10 (GENE3D); PTHR24044 (PANTHER); PTHR24044:SF222 (PANTHER); IPR018097 (PROSITE_PATTERNS); IPR013032 (PROSITE_PATTERNS); IPR000152 (PROSITE_PATTERNS); IPR013032 (PROSITE_PATTERNS); IPR013032 (PROSITE_PATTERNS); IPR000152 (PROSITE_PATTERNS); IPR000742 (PROSITE_PROFILES); IPR000742 (PROSITE_PROFILES); SSF57196 (SUPERFAMILY); SSF57196 (SUPERFAMILY)                                                                     |
| 789 | 423171_length_739_cvg_4.7_tip_1_5  | 14  | upf0364 protein c6orf211 homolog                         | 246 | 3.21E-74 | 69.10% | 0.197 | IPR002791 (PFAM); PTHR12260 (PANTHER); PTHR12260:SF1 (PANTHER); CYTOPLASMIC_DOMAIN (PHOBIUS); NON_CYTOPLASMIC_DOMAIN (PHOBIUS); TRANSMEMBRANE (PHOBIUS); IPR002791 (SUPERFAMILY)                                                                                                                                                                                                                                                                                                                                                 |
| 790 | 423527_length_740_cvg_39.3_tip_1_5 | 150 | marginal zone b- and b1-cell-specific                    | 246 | 1.21E-44 | 56.40% | 0.18  | PTHR15881:SF1 (PANTHER); PTHR15881 (PANTHER)                                                                                                                                                                                                                                                                                                                                                                                                                                                                                     |
| 791 | 423649_length_741_cvg_5.2_tip_1_4  | 14  | prostaglandin f synthase-like isoform x4                 | 247 | 1.39E-77 | 72.90% | 0.102 | IPR020471 (PRINTS); IPR023210 (G3DSA:3.20.20.GENE3D); IPR023210 (PFAM); IPR020471 (PIRSF); PTHR11732:SF133 (PANTHER); IPR001395 (PANTHER); IPR018170 (PROSITE_PATTERNS); IPR023210 (SUPERFAMILY)                                                                                                                                                                                                                                                                                                                                 |
| 792 | 423767_length_742_cvg_4.1_tip_1_4  | 12  | protein cbg17465                                         | 247 | 1.09E-18 | 56.50% | 0.206 | PTHR23022 (PANTHER); PTHR23022:SF64 (PANTHER)                                                                                                                                                                                                                                                                                                                                                                                                                                                                                    |
| 793 | 423843_length_742_cvg_2.2_tip_1_0  | 7   | ---NA---                                                 | 248 |          |        | 0.131 | NON_CYTOPLASMIC_DOMAIN (PHOBIUS); CYTOPLASMIC_DOMAIN (PHOBIUS); TRANSMEMBRANE (PHOBIUS); TMhelix (TMHMM)                                                                                                                                                                                                                                                                                                                                                                                                                         |
| 794 | 423893_length_742_cvg_2.5_tip_1_3  | 8   | alpha-l- partial                                         | 248 | 2.71E-06 | 68.29% | 0.137 | no IPS match                                                                                                                                                                                                                                                                                                                                                                                                                                                                                                                     |
| 795 | 424183_length_743_cvg_2.0_tip_1_4  | 6   | secreted frizzled-related protein 5-like                 | 248 | 7.98E-19 | 77.60% | 0.148 | IPR020067 (G3DSA:1.10.2000.GENE3D); IPR015526 (PANTHER); CYTOPLASMIC_DOMAIN (PHOBIUS); TRANSMEMBRANE (PHOBIUS); NON_CYTOPLASMIC_DOMAIN (PHOBIUS); IPR020067 (SUPERFAMILY); TMhelix (TMHMM)                                                                                                                                                                                                                                                                                                                                       |
| 796 | 424227_length_744_cvg_8.4_tip_1_0  | 17  | zinc metalloprotease                                     | 248 | 2.46E-10 | 59.20% | 0.205 | G3DSA:1.10.390.10 (GENE3D); TMhelix (TMHMM)                                                                                                                                                                                                                                                                                                                                                                                                                                                                                      |
| 797 | 424569_length_745_cvg_7.7_tip_1_5  | 27  | von willebrand factor like 1                             | 248 | 1.50E-09 | 43.10% | 0.101 | no IPS match                                                                                                                                                                                                                                                                                                                                                                                                                                                                                                                     |
| 817 | 426883_length_758_cvg_35.2_tip_1_1 | 148 | lysine--trna ligase isoform x2                           | 248 | 4.01E-79 | 94.30% | 0.111 | G3DSA:3.30.930.10 (GENE3D); IPR004364 (PFAM); IPR018150 (PANTHER); PTHR22594:SF4 (PANTHER); TRANSMEMBRANE (PHOBIUS); NON_CYTOPLASMIC_DOMAIN (PHOBIUS); NON_CYTOPLASMIC_DOMAIN (PHOBIUS); CYTOPLASMIC_DOMAIN (PHOBIUS); TRANSMEMBRANE (PHOBIUS); IPR006195 (PROSITE_PROFILES); SSF55681 (SUPERFAMILY); TMhelix (TMHMM); TMhelix (TMHMM)                                                                                                                                                                                           |
| 798 | 424657_length_746_cvg_2.0_tip_1_0  | 6   | pdz domain-containing protein 2                          | 249 | 7.80E-16 | 82.20% | 0.099 | IPR001478 (PFAM); IPR001478 (G3DSA:2.30.42.GENE3D); PTHR19964 (PANTHER); IPR001478 (PROSITE_PROFILES); IPR001478 (SUPERFAMILY)                                                                                                                                                                                                                                                                                                                                                                                                   |
| 799 | 424833_length_747_cvg_3.9_tip_1_2  | 18  | collagen alpha-1 partial                                 | 249 | 5.34E-23 | 52.60% | 0.101 | IPR008160 (PFAM); PTHR24023:SF379 (PANTHER); PTHR24023 (PANTHER)                                                                                                                                                                                                                                                                                                                                                                                                                                                                 |
| 800 | 424833_length_747_cvg_3.9_tip_1_5  | 18  | collagen-like protein                                    | 249 | 1.82E-21 | 44.30% | 0.218 | no IPS match                                                                                                                                                                                                                                                                                                                                                                                                                                                                                                                     |
| 801 | 425089_length_748_cvg_3.7_tip_1_4  | 11  | protein partial                                          | 249 | 1.54E-16 | 57.40% | 0.111 | no IPS match                                                                                                                                                                                                                                                                                                                                                                                                                                                                                                                     |
| 802 | 425111_length_748_cvg_6.4_tip_1_1  | 19  | zinc metalloproteinase nas-13                            | 249 | 3.85E-31 | 60.90% | 0.169 | IPR001506 (PRINTS); IPR024079 (G3DSA:3.40.390.GENE3D); IPR001506 (PFAM); PTHR10127 (PANTHER); SSF55486 (SUPERFAMILY)                                                                                                                                                                                                                                                                                                                                                                                                             |
| 803 | 425141_length_748_cvg_61.9_tip_1_4 | 210 | hypothetical protein BRAFLDRAFT_71031                    | 249 | 1.20E-15 | 50.50% | 0.106 | NON_CYTOPLASMIC_DOMAIN (PHOBIUS); CYTOPLASMIC_DOMAIN (PHOBIUS); TRANSMEMBRANE (PHOBIUS); TMhelix (TMHMM)                                                                                                                                                                                                                                                                                                                                                                                                                         |

|     |                                    |     |                                             |     |           |        |         |                                                                                                                                                                                                                                                                                                                                                                                                                                                                                                                                                                 |
|-----|------------------------------------|-----|---------------------------------------------|-----|-----------|--------|---------|-----------------------------------------------------------------------------------------------------------------------------------------------------------------------------------------------------------------------------------------------------------------------------------------------------------------------------------------------------------------------------------------------------------------------------------------------------------------------------------------------------------------------------------------------------------------|
| 804 | 425317_length_749_cvg_2.4_tip_1_3  | 12  | pt repeat family protein                    | 250 | 1.50E-12  | 65.30% | 0.638 Y | SignalIP-noTM (SIGNALP_EUK)                                                                                                                                                                                                                                                                                                                                                                                                                                                                                                                                     |
| 806 | 425493_length_750_cvg_2.5_tip_1_1  | 9   | zinc finger protein gfi-1b-like isoform x2  | 250 | 6.21E-23  | 72.40% | 0.101   | IPR015880 (SMART); IPR013087 (G3DSA:3.30.160.GENE3D); IPR007087 (PFAM); IPR013087 (G3DSA:3.30.160.GENE3D); PTHR24409 (PANTHER); IPR007087 (PROSITE_PATTERNS); IPR007087 (PROSITE_PATTERNS); NON_CYTOPLASMIC_DOMAIN (PHOBIUS); CYTOPLASMIC_DOMAIN (PHOBIUS); TRANSMEMBRANE (PHOBIUS); IPR007087 (PROSITE_PROFILES); IPR007087 (PROSITE_PROFILES); SSF57667 (SUPERFAMILY); TMhelix (TMHMM); TMhelix (TMHMM)                                                                                                                                                       |
| 807 | 425591_length_750_cvg_2.4_tip_1_5  | 6   | hemocyanin subunit                          | 250 | 2.61E-11  | 54.70% | 0.11    | IPR005204 (G3DSA:1.20.1370.GENE3D); IPR005204 (PFAM); IPR005204 (SUPERFAMILY)                                                                                                                                                                                                                                                                                                                                                                                                                                                                                   |
| 809 | 425989_length_753_cvg_64.9_tip_1_5 | 544 | protein twin sister of ft                   | 251 | 2.28E-24  | 59.50% | 0.142   | IPR008914 (G3DSA:3.90.280.GENE3D); IPR008914 (PFAM); PTHR11362 (PANTHER); IPR001858 (PROSITE_PATTERNS); CYTOPLASMIC_DOMAIN (PHOBIUS); TRANSMEMBRANE (PHOBIUS); NON_CYTOPLASMIC_DOMAIN (PHOBIUS); IPR008914 (SUPERFAMILY)                                                                                                                                                                                                                                                                                                                                        |
| 811 | 426635_length_756_cvg_4.6_tip_1_1  | 17  | epidermal growth factor-like protein 8-like | 252 | 1.20E-21  | 61.70% | 0.26    | IPR011489 (PFAM); NON_CYTOPLASMIC_DOMAIN (PHOBIUS); TRANSMEMBRANE (PHOBIUS); TRANSMEMBRANE (PHOBIUS); CYTOPLASMIC_DOMAIN (PHOBIUS); NON_CYTOPLASMIC_DOMAIN (PHOBIUS); IPR011489 (PROSITE_PROFILES); TMhelix (TMHMM); TMhelix (TMHMM)                                                                                                                                                                                                                                                                                                                            |
| 812 | 426683_length_757_cvg_7.7_tip_1_2  | 26  | phospholipase a-2-activating                | 252 | 4.29E-100 | 75.20% | 0.11    | IPR020472 (PRINTS); IPR001680 (SMART); IPR001680 (PFAM); IPR015943 (G3DSA:2.130.10.GENE3D); PTHR19849 (PANTHER); PTHR19849:SF0 (PANTHER); IPR017986 (PROSITE_PROFILES); IPR001680 (PROSITE_PROFILES); IPR001680 (PROSITE_PROFILES); IPR001680 (PROSITE_PROFILES); IPR017986 (SUPERFAMILY)                                                                                                                                                                                                                                                                       |
| 813 | 426729_length_757_cvg_6.3_tip_1_1  | 22  | retinol dehydrogenase 13-like               | 252 | 3.71E-99  | 76.60% | 0.109   | IPR002198 (PRINTS); IPR002347 (PRINTS); IPR016040 (G3DSA:3.40.50.GENE3D); IPR002198 (PFAM); PTHR24320:SF55 (PANTHER); PTHR24320 (PANTHER); NON_CYTOPLASMIC_DOMAIN (PHOBIUS); CYTOPLASMIC_DOMAIN (PHOBIUS); TRANSMEMBRANE (PHOBIUS); SSF51735 (SUPERFAMILY); TMhelix (TMHMM)                                                                                                                                                                                                                                                                                     |
| 815 | 426751_length_757_cvg_2.0_tip_1_2  | 6   | zinc finger protein partial                 | 252 | 5.53E-67  | 75.90% | 0.107   | IPR015880 (SMART); IPR013087 (G3DSA:3.30.160.GENE3D); IPR013087 (G3DSA:3.30.160.GENE3D); PF13465 (PFAM); PTHR24409 (PANTHER); IPR007087 (PROSITE_PATTERNS); IPR007087 (PROSITE_PROFILES); IPR007087 (PROSITE_PROFILES); IPR007087 (PROSITE_PROFILES); SSF57667 (SUPERFAMILY); SSF57667 (SUPERFAMILY)                                                                                                                                                                                                                                                            |
| 841 | 430955_length_781_cvg_12.4_tip_1_4 | 40  | peptidyl-prolyl cis-trans isomerase-like 6  | 252 | 6.44E-18  | 61.70% | 0.103   | IPR029000 (G3DSA:2.40.100.GENE3D); IPR002130 (PFAM); PTHR11071:SF210 (PANTHER); IPR024936 (PANTHER); IPR002130 (PROSITE_PROFILES); IPR029000 (SUPERFAMILY)                                                                                                                                                                                                                                                                                                                                                                                                      |
| 816 | 426761_length_757_cvg_30.1_tip_1_3 | 63  | gastrula zinc finger isoform x1             | 253 | 1.92E-35  | 61.30% | 0.101   | IPR015880 (SMART); IPR013087 (G3DSA:3.30.160.GENE3D); IPR013087 (G3DSA:3.30.160.GENE3D); IPR013087 (G3DSA:3.30.160.GENE3D); PF13912 (PFAM); PF13465 (PFAM); PTHR24409:SF14 (PANTHER); PTHR24409 (PANTHER); IPR007087 (PROSITE_PATTERNS); IPR007087 (PROSITE_PATTERNS); IPR007087 (PROSITE_PATTERNS); IPR007087 (PROSITE_PATTERNS); IPR007087 (PROSITE_PATTERNS); IPR007087 (PROSITE_PROFILES); IPR007087 (PROSITE_PROFILES); IPR007087 (PROSITE_PROFILES); IPR007087 (PROSITE_PROFILES); SSF57667 (SUPERFAMILY); SSF57667 (SUPERFAMILY); SSF57667 (SUPERFAMILY) |
| 818 | 427391_length_760_cvg_9.5_tip_1_3  | 29  | peroxidase isoform x2                       | 254 | 8.58E-14  | 65.10% | 0.104   | IPR019791 (G3DSA:1.10.640.GENE3D); PTHR11475 (PANTHER); IPR019791 (PROSITE_PROFILES); IPR010255 (SUPERFAMILY)                                                                                                                                                                                                                                                                                                                                                                                                                                                   |
| 819 | 427557_length_761_cvg_4.4_tip_1_0  | 15  | heat shock protein 70 a1-like               | 254 | 4.19E-161 | 95.50% | 0.1     | IPR013126 (PRINTS); G3DSA:3.30.420.40 (GENE3D); IPR013126 (PFAM); IPR029047 (G3DSA:2.60.34.GENE3D); G3DSA:3.90.640.10 (GENE3D); PTHR19375 (PANTHER); PTHR19375:SF142 (PANTHER); IPR029047 (SUPERFAMILY); SSF53067 (SUPERFAMILY)                                                                                                                                                                                                                                                                                                                                 |
| 820 | 427827_length_763_cvg_9.6_tip_1_4  | 23  | adp-ribosylation factor-like protein 5b     | 254 | 2.15E-60  | 97.10% | 0.152   | IPR006689 (PRINTS); IPR024156 (SMART); IPR005225 (TIGRFAM); IPR027417 (G3DSA:3.40.50.GENE3D); IPR006689 (PFAM); PTHR11711 (PANTHER); PTHR11711:SF146 (PANTHER); IPR024156 (PROSITE_PROFILES); IPR027417 (SUPERFAMILY)                                                                                                                                                                                                                                                                                                                                           |
| 821 | 427873_length_763_cvg_6.5_tip_1_5  | 17  | cre-ptr-16 protein                          | 254 | 5.49E-22  | 56.80% | 0.246   | PTHR23022 (PANTHER); CYTOPLASMIC_DOMAIN (PHOBIUS); NON_CYTOPLASMIC_DOMAIN (PHOBIUS); TRANSMEMBRANE (PHOBIUS)                                                                                                                                                                                                                                                                                                                                                                                                                                                    |
| 822 | 428007_length_764_cvg_3.4_tip_1_0  | 11  | serine protease easter                      | 255 | 3.04E-50  | 59.80% | 0.15    | IPR001314 (PRINTS); IPR001254 (SMART); G3DSA:2.40.10.10 (GENE3D); IPR001254 (PFAM); G3DSA:2.40.10.10 (GENE3D); PTHR24268 (PANTHER); PTHR24268:SF85 (PANTHER); IPR018114 (PROSITE_PATTERNS); IPR018114 (PROSITE_PATTERNS); IPR001254 (PROSITE_PROFILES); IPR009003 (SUPERFAMILY)                                                                                                                                                                                                                                                                                 |

|     |                                     |        |                                                                                                                                                                                |     |          |        |         |                                                                                                                                                                                                                                                                                                                      |
|-----|-------------------------------------|--------|--------------------------------------------------------------------------------------------------------------------------------------------------------------------------------|-----|----------|--------|---------|----------------------------------------------------------------------------------------------------------------------------------------------------------------------------------------------------------------------------------------------------------------------------------------------------------------------|
| 823 | 428181_length_765_cvg_28.7_tip_1_3  | 111    | l-xylulose reductase                                                                                                                                                           | 255 | 5.35E-90 | 80.60% | 0.12    | IPR002198 (PRINTS); IPR002347 (PRINTS); PF13561 (PFAM); IPR016040 (G3DSA:3.40.50.GENE3D); PTHR24311:SF6 (PANTHER); PTHR24311 (PANTHER); IPR020904 (PROSITE_PATTERNS); SSF51735 (SUPERFAMILY)                                                                                                                         |
| 824 | 428377_length_766_cvg_14.2_tip_1_1  | 39     | prenylcysteine oxidase-like                                                                                                                                                    | 255 | 2.88E-61 | 64.20% | 0.211   | PF13450 (PFAM); IPR010795 (PFAM); G3DSA:3.50.50.60 (GENE3D); IPR017046 (PANTHER); SSF51905 (SUPERFAMILY)                                                                                                                                                                                                             |
| 825 | 428525_length_767_cvg_41.4_tip_1_0  | 95     | suppressor of tumorigenicity 14 protein                                                                                                                                        | 256 | 5.71E-07 | 64.86% | 0.155   | IPR001254 (PFAM); G3DSA:2.40.10.10 (GENE3D); PTHR24256 (PANTHER); CYTOPLASMIC_DOMAIN (PHOBIUS); CYTOPLASMIC_DOMAIN (PHOBIUS); TRANSMEMBRANE (PHOBIUS); NON_CYTOPLASMIC_DOMAIN (PHOBIUS); TRANSMEMBRANE (PHOBIUS); IPR009003 (SUPERFAMILY); TMhelix (TMHMM); TMhelix (TMHMM)                                          |
| 826 | 428585_length_767_cvg_2.0_tip_1_1   | 9      | penicillin-binding protein partial                                                                                                                                             | 256 | 0        | 99.40% | 0.144   | IPR012338 (G3DSA:3.40.710.GENE3D); IPR012340 (G3DSA:2.40.50.GENE3D); IPR001460 (PFAM); PTHR32282:SF5 (PANTHER); PTHR32282 (PANTHER); IPR012338 (SUPERFAMILY)                                                                                                                                                         |
| 828 | 428969_length_769_cvg_4.8_tip_1_1   | 22     | peptidyl-prolyl cis-trans                                                                                                                                                      | 256 | 3.58E-57 | 71.20% | 0.098   | IPR029000 (G3DSA:2.40.100.GENE3D); IPR002130 (PFAM); IPR024936 (PANTHER); PTHR11071:SF193 (PANTHER); TRANSMEMBRANE (PHOBIUS); NON_CYTOPLASMIC_DOMAIN (PHOBIUS); CYTOPLASMIC_DOMAIN (PHOBIUS); IPR002130 (PROSITE_PROFILES); IPR029000 (SUPERFAMILY)                                                                  |
| 827 | 428943_length_769_cvg_9.5_tip_1_0   | 35     | niemann-pick type c1 domain-containing                                                                                                                                         | 257 | 6.40E-58 | 72.50% | 0.114   | Coil (COILS); Coil (COILS); PTHR19237:SF20 (PANTHER); PTHR19237 (PANTHER); NON_CYTOPLASMIC_DOMAIN (PHOBIUS); TRANSMEMBRANE (PHOBIUS); CYTOPLASMIC_DOMAIN (PHOBIUS); TMhelix (TMHMM)                                                                                                                                  |
| 829 | 429347_length_772_cvg_6.0_tip_1_1   | 15     | carbohydrate sulfotransferase 11-like                                                                                                                                          | 257 | 1.68E-43 | 68.50% | 0.098   | IPR005331 (PFAM); PTHR12137:SF29 (PANTHER); IPR018011 (PANTHER); TMhelix (TMHMM); TMhelix (TMHMM)                                                                                                                                                                                                                    |
| 830 | 429715_length_774_cvg_6.7_tip_1_0   | 18     | neurofilament medium polypeptide                                                                                                                                               | 258 | 8.48E-13 | 54.20% | 0.096   | no IPS match                                                                                                                                                                                                                                                                                                         |
| 831 | 429789_length_774_cvg_3.1_tip_1_0   | 11     | mam and ldl-receptor class a domain-containing protein 2-like                                                                                                                  | 258 | 8.70E-41 | 60.50% | 0.149   | IPR000998 (SMART); IPR000998 (PFAM); PTHR23282 (PANTHER); IPR000998 (PROSITE_PATTERNS); IPR000998 (PROSITE_PROFILES); IPR000998 (PROSITE_PROFILES); IPR013320 (SUPERFAMILY)                                                                                                                                          |
| 832 | 429789_length_774_cvg_3.1_tip_1_2   | 11     | mlrp2_acrmi ame: full=mam and ldl-receptor class a domain-containing protein 2 ame: full=skeletal organic matrix mam and ldl-receptor 2 short=som mam and ldl-receptor partial | 258 | 1.40E-07 | 55.86% | 0.107   | IPR000998 (PFAM); PTHR23282 (PANTHER); PTHR23282:SF75 (PANTHER); IPR000998 (PROSITE_PROFILES); IPR013320 (SUPERFAMILY)                                                                                                                                                                                               |
| 833 | 429855_length_775_cvg_12.4_tip_1_5  | 34     | esterase fe4                                                                                                                                                                   | 258 | 6.22E-91 | 70.60% | 0.547 Y | IPR029058 (G3DSA:3.40.50.GENE3D); IPR002018 (PFAM); PTHR11559 (PANTHER); IPR019826 (PROSITE_PATTERNS); IPR019819 (PROSITE_PATTERNS); SignalP-noTM (SIGNALP_EUK); IPR029058 (SUPERFAMILY)                                                                                                                             |
| 834 | 430241_length_777_cvg_3.5_tip_1_4   | 17     | trafficking protein particle complex subunit 1                                                                                                                                 | 259 | 1.30E-62 | 86.10% | 0.167   | IPR007233 (PFAM); G3DSA:3.30.450.70 (GENE3D); PTHR23249:SF16 (PANTHER); IPR007233 (PANTHER); NON_CYTOPLASMIC_DOMAIN (PHOBIUS); TRANSMEMBRANE (PHOBIUS); CYTOPLASMIC_DOMAIN (PHOBIUS); IPR011012 (SUPERFAMILY); TMhelix (TMHMM)                                                                                       |
| 835 | 430243_length_777_cvg_61.3_tip_1_0  | 817    | superoxide dismutase                                                                                                                                                           | 259 | 5.37E-78 | 85.20% | 0.171   | IPR001424 (PRINTS); IPR001424 (G3DSA:2.60.40.GENE3D); IPR001424 (PFAM); PTHR10003:SF33 (PANTHER); PTHR10003 (PANTHER); IPR018152 (PROSITE_PATTERNS); IPR018152 (PROSITE_PATTERNS); NON_CYTOPLASMIC_DOMAIN (PHOBIUS); TRANSMEMBRANE (PHOBIUS); CYTOPLASMIC_DOMAIN (PHOBIUS); IPR001424 (SUPERFAMILY); TMhelix (TMHMM) |
| 836 | 430251_length_777_cvg_76.7_tip_0_1  | 2443   | annexin b10-like                                                                                                                                                               | 259 | 1.14E-83 | 69.70% | 0.104   | IPR001464 (PRINTS); IPR018502 (SMART); IPR018502 (G3DSA:1.10.220.GENE3D); IPR018502 (PFAM); IPR018502 (G3DSA:1.10.220.GENE3D); IPR018502 (G3DSA:1.10.220.GENE3D); PTHR10502 (PANTHER); IPR018252 (PROSITE_PATTERNS); SSF47874 (SUPERFAMILY)                                                                          |
| 837 | 430289_length_777_cvg_6.7_tip_1_3   | 22     | gamma-glutamyl hydrolase-like                                                                                                                                                  | 259 | 1.84E-57 | 68.00% | 0.114   | IPR011697 (PFAM); IPR029062 (G3DSA:3.40.50.GENE3D); IPR015527 (PANTHER); PTHR11315:SF2 (PANTHER); TRANSMEMBRANE (PHOBIUS); NON_CYTOPLASMIC_DOMAIN (PHOBIUS); CYTOPLASMIC_DOMAIN (PHOBIUS); IPR015527 (PROSITE_PROFILES); IPR029062 (SUPERFAMILY); TMhelix (TMHMM)                                                    |
| 838 | 430315_length_777_cvg_102.3_tip_1_3 | 225214 | secreted salivary gland                                                                                                                                                        | 259 | 7.88E-34 | 54.40% | 0.104   | IPR001314 (PRINTS); IPR001254 (SMART); G3DSA:2.40.10.10 (GENE3D); G3DSA:2.40.10.10 (GENE3D); IPR001254 (PFAM); PTHR24265 (PANTHER); IPR018114 (PROSITE_PATTERNS); IPR001254 (PROSITE_PROFILES); IPR009003 (SUPERFAMILY)                                                                                              |

|     |                                    |      |                                                             |     |           |        |         |                                                                                                                                                                                                                                                                                                                                                                                                                                                                                                                                                                                                                                                                                                                                         |
|-----|------------------------------------|------|-------------------------------------------------------------|-----|-----------|--------|---------|-----------------------------------------------------------------------------------------------------------------------------------------------------------------------------------------------------------------------------------------------------------------------------------------------------------------------------------------------------------------------------------------------------------------------------------------------------------------------------------------------------------------------------------------------------------------------------------------------------------------------------------------------------------------------------------------------------------------------------------------|
| 839 | 430805_length_780_cvg_2.0_tip_1_2  | 9    | vitellogenin receptor                                       | 260 | 6.85E-50  | 56.00% | 0.12    | IPR002172 (PRINTS); IPR001881 (SMART); IPR000742 (SMART); IPR002172 (SMART); G3DSA:2.10.25.10 (GENE3D); G3DSA:2.10.25.10 (GENE3D); IPR002172 (G3DSA:4.10.400.GENE3D); IPR002172 (PFAM); IPR002172 (G3DSA:4.10.400.GENE3D); IPR001881 (PFAM); PTHR10529 (PANTHER); PTHR10529:SF204 (PANTHER); IPR023415 (PROSITE_PATTERNS); IPR013032 (PROSITE_PATTERNS); IPR023415 (PROSITE_PATTERNS); IPR023415 (PROSITE_PATTERNS); IPR018097 (PROSITE_PATTERNS); IPR013032 (PROSITE_PATTERNS); IPR000152 (PROSITE_PATTERNS); IPR002172 (PROSITE_PROFILES); IPR002172 (PROSITE_PROFILES); IPR002172 (PROSITE_PROFILES); IPR002172 (PROSITE_PROFILES); IPR002172 (SUPERFAMILY); IPR002172 (SUPERFAMILY); SSF57196 (SUPERFAMILY); SSF57196 (SUPERFAMILY) |
| 840 | 430951_length_781_cvg_2.6_tip_1_4  | 11   | hypothetical protein Y032_0322g2447                         | 260 | 2.00E-24  | 52.50% | 0.185   | PTHR23022:SF64 (PANTHER); PTHR23022 (PANTHER)                                                                                                                                                                                                                                                                                                                                                                                                                                                                                                                                                                                                                                                                                           |
| 842 | 431395_length_784_cvg_3.0_tip_1_1  | 9    | low quality protein: zinc finger protein 233                | 261 | 2.79E-67  | 67.00% | 0.116   | IPR015880 (SMART); IPR007087 (PFAM); IPR013087 (G3DSA:3.30.160.GENE3D); IPR013087 (G3DSA:3.30.160.GENE3D); IPR013087 (G3DSA:3.30.160.GENE3D); PF13465 (PFAM); PTHR24409 (PANTHER); IPR007087 (PROSITE_PATTERNS); IPR007087 (PROSITE_PATTERNS); IPR007087 (PROSITE_PATTERNS); IPR007087 (PROSITE_PATTERNS); IPR007087 (PROSITE_PATTERNS); IPR007087 (PROSITE_PROFILES); IPR007087 (PROSITE_PROFILES); IPR007087 (PROSITE_PROFILES); IPR007087 (PROSITE_PROFILES); IPR007087 (PROSITE_PROFILES); IPR007087 (PROSITE_PROFILES); SSF57667 (SUPERFAMILY); SSF57667 (SUPERFAMILY); SSF57667 (SUPERFAMILY); SSF57667 (SUPERFAMILY)                                                                                                             |
| 843 | 431465_length_784_cvg_2.7_tip_1_5  | 7    | leukotriene a-4 hydrolase                                   | 261 | 2.16E-76  | 75.60% | 0.096   | IPR014782 (PRINTS); IPR014782 (PFAM); IPR001930 (PANTHER); PTHR11533:SF4 (PANTHER); SSF63737 (SUPERFAMILY)                                                                                                                                                                                                                                                                                                                                                                                                                                                                                                                                                                                                                              |
| 844 | 431471_length_784_cvg_2.5_tip_1_4  | 7    | zinc finger protein 699-like isoform x1                     | 261 | 3.66E-38  | 59.00% | 0.103   | IPR015880 (SMART); IPR013087 (G3DSA:3.30.160.GENE3D); IPR007087 (PFAM); PF13894 (PFAM); IPR013087 (G3DSA:3.30.160.GENE3D); PF13465 (PFAM); IPR013087 (G3DSA:3.30.160.GENE3D); PTHR24409 (PANTHER); PTHR24409:SF13 (PANTHER); IPR007087 (PROSITE_PATTERNS); IPR007087 (PROSITE_PATTERNS); IPR007087 (PROSITE_PATTERNS); IPR007087 (PROSITE_PATTERNS); IPR007087 (PROSITE_PROFILES); IPR007087 (PROSITE_PROFILES); IPR007087 (PROSITE_PROFILES); IPR007087 (PROSITE_PROFILES); IPR007087 (PROSITE_PROFILES); SSF57667 (SUPERFAMILY); SSF57667 (SUPERFAMILY); SSF57667 (SUPERFAMILY)                                                                                                                                                       |
| 854 | 435732_length_810_cvg_21.3_tip_1_0 | 73   | trafficking protein particle complex subunit 1 isoform x1   | 262 | 7.57E-07  | 71.00% | 0.231   | IPR007233 (PFAM)                                                                                                                                                                                                                                                                                                                                                                                                                                                                                                                                                                                                                                                                                                                        |
| 860 | 436234_length_814_cvg_21.4_tip_1_2 | 66   | spondin-2 isoform x1                                        | 262 | 9.11E-13  | 75.30% | 0.166   | IPR009465 (PFAM); CYTOPLASMIC_DOMAIN (PHOBIUS); TRANSMEMBRANE (PHOBIUS); NON_CYTOPLASMIC_DOMAIN (PHOBIUS); IPR009465 (PROSITE_PROFILES); TMhelix (TMHMM)                                                                                                                                                                                                                                                                                                                                                                                                                                                                                                                                                                                |
| 845 | 432175_length_788_cvg_8.0_tip_1_3  | 26   | ---NA---                                                    | 263 |           |        | 0.104   | CYTOPLASMIC_DOMAIN (PHOBIUS); NON_CYTOPLASMIC_DOMAIN (PHOBIUS); TRANSMEMBRANE (PHOBIUS); TRANSMEMBRANE (PHOBIUS); CYTOPLASMIC_DOMAIN (PHOBIUS)                                                                                                                                                                                                                                                                                                                                                                                                                                                                                                                                                                                          |
| 846 | 432275_length_789_cvg_3.3_tip_1_3  | 9    | repetitive proline-rich cell wall protein 2-like isoform x2 | 263 | 3.77E-28  | 51.90% | 0.137   | TRANSMEMBRANE (PHOBIUS); NON_CYTOPLASMIC_DOMAIN (PHOBIUS); CYTOPLASMIC_DOMAIN (PHOBIUS); SSF141571 (SUPERFAMILY)                                                                                                                                                                                                                                                                                                                                                                                                                                                                                                                                                                                                                        |
| 855 | 435846_length_811_cvg_11.9_tip_1_2 | 32   | hemagglutinin                                               | 263 | 1.75E-27  | 57.00% | 0.135   | IPR001570 (PFAM); IPR007280 (PFAM); G3DSA:1.10.390.10 (GENE3D); CYTOPLASMIC_DOMAIN (PHOBIUS); TRANSMEMBRANE (PHOBIUS); NON_CYTOPLASMIC_DOMAIN (PHOBIUS); SSF55486 (SUPERFAMILY); TMhelix (TMHMM)                                                                                                                                                                                                                                                                                                                                                                                                                                                                                                                                        |
| 847 | 433549_length_796_cvg_62.9_tip_1_2 | 1381 | protein disulfide-isomerase a3                              | 265 | 1.76E-102 | 76.90% | 0.354 Y | PR00421 (PRINTS); IPR012336 (G3DSA:3.40.30.GENE3D); IPR012336 (G3DSA:3.40.30.GENE3D); PF13848 (PFAM); IPR013766 (PFAM); IPR005788 (TIGRFAM); PTHR18929:SF74 (PANTHER); PTHR18929 (PANTHER); IPR017937 (PROSITE_PATTERNS); CYTOPLASMIC_DOMAIN (PHOBIUS); TRANSMEMBRANE (PHOBIUS); NON_CYTOPLASMIC_DOMAIN (PHOBIUS); IPR012336 (PROSITE_PROFILES); IPR012336 (SUPERFAMILY); IPR012336 (SUPERFAMILY)                                                                                                                                                                                                                                                                                                                                       |
| 848 | 433855_length_798_cvg_4.7_tip_1_5  | 19   | neutral ceramidase                                          | 266 | 5.14E-62  | 65.80% | 0.108   | IPR006823 (PFAM); IPR006823 (PANTHER); PTHR12670:SF1 (PANTHER)                                                                                                                                                                                                                                                                                                                                                                                                                                                                                                                                                                                                                                                                          |
| 869 | 437874_length_825_cvg_72.1_tip_1_2 | 666  | protein them6                                               | 266 | 1.41E-25  | 54.90% | 0.149   | IPR029069 (G3DSA:3.10.129.GENE3D); PF13279 (PFAM); PTHR12475 (PANTHER); IPR029069 (SUPERFAMILY); TMhelix (TMHMM)                                                                                                                                                                                                                                                                                                                                                                                                                                                                                                                                                                                                                        |

|     |                                    |         |                                                 |     |           |        |       |                                                                                                                                                                                                                                                                                                                                                                                                                                                                                                                                                                                                                                                                                 |
|-----|------------------------------------|---------|-------------------------------------------------|-----|-----------|--------|-------|---------------------------------------------------------------------------------------------------------------------------------------------------------------------------------------------------------------------------------------------------------------------------------------------------------------------------------------------------------------------------------------------------------------------------------------------------------------------------------------------------------------------------------------------------------------------------------------------------------------------------------------------------------------------------------|
| 849 | 434079_length_800_cvg_4.1_tip_1_1  | 14      | proactivator polypeptide                        | 267 | 1.56E-10  | 71.90% | 0.119 | IPR008139 (SMART); IPR008138 (PFAM); IPR011001 (G3DSA:1.10.225.GENE3D); PTHR11480:SF3 (PANTHER); PTHR11480 (PANTHER); CYTOPLASMIC_DOMAIN (PHOBIUS); TRANSMEMBRANE (PHOBIUS); NON_CYTOPLASMIC_DOMAIN (PHOBIUS); NON_CYTOPLASMIC_DOMAIN (PHOBIUS); TRANSMEMBRANE (PHOBIUS); IPR008139 (PROSITE_PROFILES); IPR011001 (SUPERFAMILY); TMhelix (TMHMM); TMhelix (TMHMM)                                                                                                                                                                                                                                                                                                               |
| 871 | 438794_length_831_cvg_61.8_tip_1_1 | 782     | hemagglutinin amebocyte aggregation factor-like | 267 | 5.86E-38  | 57.90% | 0.229 | PF14704 (PFAM); IPR026645 (PANTHER); NON_CYTOPLASMIC_DOMAIN (PHOBIUS); TRANSMEMBRANE (PHOBIUS); CYTOPLASMIC_DOMAIN (PHOBIUS); TMhelix (TMHMM)                                                                                                                                                                                                                                                                                                                                                                                                                                                                                                                                   |
| 896 | 441963_length_853_cvg_16.5_tip_1_4 | 58      | epididymal secretory protein e1                 | 267 | 3.03E-23  | 58.80% | 0.133 | IPR003172 (SMART); IPR003172 (PFAM); IPR003172 (G3DSA:2.60.40.GENE3D); PTHR11306 (PANTHER); PTHR11306:SF3 (PANTHER); IPR014756 (SUPERFAMILY)                                                                                                                                                                                                                                                                                                                                                                                                                                                                                                                                    |
| 850 | 435057_length_806_cvg_2.5_tip_1_0  | 7       | ligand of numb protein x 2                      | 269 | 1.97E-41  | 67.40% | 0.131 | IPR001478 (SMART); IPR001478 (G3DSA:2.30.42.GENE3D); IPR001478 (PFAM); IPR001478 (G3DSA:2.30.42.GENE3D); PTHR19964 (PANTHER); IPR001478 (PROSITE_PROFILES); IPR001478 (PROSITE_PROFILES); IPR001478 (SUPERFAMILY); IPR001478 (SUPERFAMILY)                                                                                                                                                                                                                                                                                                                                                                                                                                      |
| 851 | 435088_length_806_cvg_11.4_tip_1_1 | 34      | cysteine-rich motor neuron 1                    | 269 | 3.23E-41  | 59.90% | 0.141 | IPR000867 (SMART); IPR000867 (PFAM); PTHR14186:SF8 (PANTHER); IPR011390 (PANTHER); CYTOPLASMIC_DOMAIN (PHOBIUS); TRANSMEMBRANE (PHOBIUS); CYTOPLASMIC_DOMAIN (PHOBIUS); NON_CYTOPLASMIC_DOMAIN (PHOBIUS); TRANSMEMBRANE (PHOBIUS); IPR000867 (PROSITE_PROFILES); IPR009030 (SUPERFAMILY); TMhelix (TMHMM); TMhelix (TMHMM)                                                                                                                                                                                                                                                                                                                                                      |
| 852 | 435248_length_807_cvg_4.2_tip_1_1  | 15      | low quality protein: zinc finger protein 233    | 269 | 1.56E-32  | 60.80% | 0.099 | IPR015880 (SMART); IPR013087 (G3DSA:3.30.160.GENE3D); IPR007087 (PFAM); IPR013087 (G3DSA:3.30.160.GENE3D); IPR013087 (G3DSA:3.30.160.GENE3D); IPR013087 (G3DSA:3.30.160.GENE3D); PF13465 (PFAM); PTHR24409 (PANTHER); IPR007087 (PROSITE_PATTERNS); IPR007087 (PROSITE_PATTERNS); IPR007087 (PROSITE_PATTERNS); IPR007087 (PROSITE_PATTERNS); IPR007087 (PROSITE_PATTERNS); IPR007087 (PROSITE_PROFILES); IPR007087 (PROSITE_PROFILES); IPR007087 (PROSITE_PROFILES); IPR007087 (PROSITE_PROFILES); IPR007087 (PROSITE_PROFILES); IPR007087 (PROSITE_PROFILES); SSF57667 (SUPERFAMILY); SSF57667 (SUPERFAMILY); SSF57667 (SUPERFAMILY); SSF57667 (SUPERFAMILY); TMhelix (TMHMM) |
| 853 | 435330_length_808_cvg_2.0_tip_1_1  | 8       | exostosin 1-like protein                        | 269 | 2.96E-116 | 79.40% | 0.113 | IPR004263 (PFAM); PTHR11062 (PANTHER); PTHR11062:SF7 (PANTHER)                                                                                                                                                                                                                                                                                                                                                                                                                                                                                                                                                                                                                  |
| 856 | 435974_length_812_cvg_5.4_tip_1_5  | 19      | zinc finger protein 665-like                    | 270 | 1.44E-58  | 62.60% | 0.099 | IPR015880 (SMART); IPR007087 (PFAM); IPR013087 (G3DSA:3.30.160.GENE3D); IPR013087 (G3DSA:3.30.160.GENE3D); IPR013087 (G3DSA:3.30.160.GENE3D); PF13465 (PFAM); PTHR24409 (PANTHER); IPR007087 (PROSITE_PATTERNS); IPR007087 (PROSITE_PATTERNS); IPR007087 (PROSITE_PATTERNS); IPR007087 (PROSITE_PATTERNS); IPR007087 (PROSITE_PATTERNS); IPR007087 (PROSITE_PROFILES); IPR007087 (PROSITE_PROFILES); IPR007087 (PROSITE_PROFILES); IPR007087 (PROSITE_PROFILES); IPR007087 (PROSITE_PROFILES); IPR007087 (PROSITE_PROFILES); SSF57667 (SUPERFAMILY); SSF57667 (SUPERFAMILY); SSF57667 (SUPERFAMILY)                                                                             |
| 878 | 439269_length_835_cvg_4.2_tip_1_4  | 16      | developmental protein cactus                    | 270 | 2.70E-25  | 70.70% | 0.114 | IPR002110 (SMART); IPR020683 (G3DSA:1.25.40.GENE3D); IPR020683 (PFAM); PTHR24139:SF26 (PANTHER); PTHR24139 (PANTHER); NON_CYTOPLASMIC_DOMAIN (PHOBIUS); TRANSMEMBRANE (PHOBIUS); CYTOPLASMIC_DOMAIN (PHOBIUS); IPR002110 (PROSITE_PROFILES); IPR002110 (PROSITE_PROFILES); IPR020683 (PROSITE_PROFILES); IPR020683 (SUPERFAMILY); TMhelix (TMHMM)                                                                                                                                                                                                                                                                                                                               |
| 857 | 436060_length_813_cvg_2.6_tip_1_4  | 14      | nepriysin 2 isoform x3                          | 271 | 1.66E-104 | 72.00% | 0.1   | IPR018497 (PRINTS); IPR018497 (PFAM); IPR024079 (G3DSA:3.40.390.GENE3D); IPR000718 (PANTHER); PTHR11733:SF113 (PANTHER); SSF55486 (SUPERFAMILY)                                                                                                                                                                                                                                                                                                                                                                                                                                                                                                                                 |
| 858 | 436116_length_813_cvg_85.8_tip_0_3 | 2705088 | isoform k                                       | 271 | 6.99E-42  | 48.30% | 0.105 | IPR002557 (SMART); IPR001223 (PFAM); IPR029070 (G3DSA:3.10.50.GENE3D); IPR013781 (G3DSA:3.20.20.GENE3D); IPR002557 (G3DSA:2.170.140.GENE3D); IPR002557 (PFAM); PTHR11177 (PANTHER); PTHR11177:SF133 (PANTHER); IPR002557 (PROSITE_PROFILES); IPR017853 (SUPERFAMILY); IPR029070 (SUPERFAMILY); IPR002557 (SUPERFAMILY)                                                                                                                                                                                                                                                                                                                                                          |





|     |                                    |     |                                 |     |          |        |         |                                                                                                                                                                                                                                                                                                                                                                                                                                                                                                                                    |
|-----|------------------------------------|-----|---------------------------------|-----|----------|--------|---------|------------------------------------------------------------------------------------------------------------------------------------------------------------------------------------------------------------------------------------------------------------------------------------------------------------------------------------------------------------------------------------------------------------------------------------------------------------------------------------------------------------------------------------|
| 873 | 438903_length_832_cvg_3.3_tip_1_3  | 13  | krueppel-like factor 5          | 278 | 1.87E-46 | 96.20% | 0.103   | IPR015880 (SMART); PF13465 (PFAM); IPR013087 (G3DSA:3.30.160.GENE3D); IPR013087 (G3DSA:3.30.160.GENE3D); IPR013087 (G3DSA:3.30.160.GENE3D); PTHR23223 (PANTHER); IPR007087 (PROSITE_PATTERNS); IPR007087 (PROSITE_PATTERNS); IPR007087 (PROSITE_PROFILES); IPR007087 (PROSITE_PROFILES); IPR007087 (PROSITE_PROFILES); SSF57667 (SUPERFAMILY)                                                                                                                                                                                      |
| 874 | 439057_length_833_cvg_6.3_tip_1_3  | 21  | integral membrane protein 2c    | 278 | 1.20E-91 | 66.60% | 0.14    | IPR007084 (SMART); IPR007084 (PFAM); PTHR10962:SF1 (PANTHER); PTHR10962 (PANTHER); CYTOPLASMIC_DOMAIN (PHOBIUS); NON_CYTOPLASMIC_DOMAIN (PHOBIUS); TRANSMEMBRANE (PHOBIUS); IPR007084 (PROSITE_PROFILES); TMhelix (TMHMM)                                                                                                                                                                                                                                                                                                          |
| 875 | 439061_length_833_cvg_2.9_tip_1_1  | 11  | neural cell adhesion molecule 1 | 278 | 1.63E-32 | 54.90% | 0.477 Y | IPR003599 (SMART); IPR003598 (SMART); IPR013783 (G3DSA:2.60.40.GENE3D); PF13895 (PFAM); IPR013783 (G3DSA:2.60.40.GENE3D); IPR013098 (PFAM); PTHR19831:SF40 (PANTHER); PTHR19831 (PANTHER); IPR007110 (PROSITE_PROFILES); IPR007110 (PROSITE_PROFILES); SignalP-noTM (SIGNALP_EUK); SSF48726 (SUPERFAMILY); SSF48726 (SUPERFAMILY)                                                                                                                                                                                                  |
| 877 | 439197_length_834_cvg_2.6_tip_1_4  | 8   | cathepsin partial               | 278 | 4.20E-30 | 83.60% | 0.146   | G3DSA:3.90.70.10 (GENE3D); IPR000668 (PFAM); IPR013128 (PANTHER); PTHR12411:SF289 (PANTHER); IPR025661 (PROSITE_PATTERNS); IPR025660 (PROSITE_PATTERNS); SSF54001 (SUPERFAMILY); TMhelix (TMHMM); TMhelix (TMHMM); TMhelix (TMHMM)                                                                                                                                                                                                                                                                                                 |
| 904 | 443595_length_865_cvg_48.1_tip_1_4 | 422 | histone h2a-like                | 279 | 1.68E-79 | 96.80% | 0.221   | IPR002119 (PRINTS); IPR002119 (SMART); IPR009072 (G3DSA:1.10.20.GENE3D); IPR007125 (PFAM); PTHR23430:SF45 (PANTHER); PTHR23430 (PANTHER); IPR002119 (PROSITE_PATTERNS); TRANSMEMBRANE (PHOBIUS); CYTOPLASMIC_DOMAIN (PHOBIUS); NON_CYTOPLASMIC_DOMAIN (PHOBIUS); IPR009072 (SUPERFAMILY); TMhelix (TMHMM)                                                                                                                                                                                                                          |
| 879 | 440019_length_840_cvg_2.9_tip_1_2  | 11  | spondin-1                       | 280 | 3.58E-94 | 68.50% | 0.136   | IPR002223 (PRINTS); IPR000884 (SMART); IPR002223 (SMART); IPR002223 (G3DSA:4.10.410.GENE3D); G3DSA:2.20.100.10 (GENE3D); G3DSA:2.20.100.10 (GENE3D); IPR000884 (PFAM); IPR002223 (PFAM); PTHR11311 (PANTHER); PTHR11311:SF11 (PANTHER); IPR020901 (PROSITE_PATTERNS); IPR002223 (PROSITE_PROFILES); IPR000884 (PROSITE_PROFILES); IPR000884 (PROSITE_PROFILES); IPR000884 (PROSITE_PROFILES); IPR002223 (SUPERFAMILY); IPR000884 (SUPERFAMILY); IPR000884 (SUPERFAMILY); IPR000884 (SUPERFAMILY)                                   |
| 880 | 440147_length_841_cvg_19.6_tip_1_3 | 75  | Adrenodoxin, mitochondrial      | 281 | 2.89E-52 | 76.80% | 0.148   | IPR001055 (PRINTS); IPR012675 (G3DSA:3.10.20.GENE3D); IPR001041 (PFAM); PTHR23426:SF21 (PANTHER); PTHR23426 (PANTHER); IPR018298 (PROSITE_PATTERNS); IPR001041 (PROSITE_PROFILES); IPR001041 (SUPERFAMILY)                                                                                                                                                                                                                                                                                                                         |
| 882 | 440359_length_842_cvg_11.8_tip_1_0 | 52  | thioredoxin 2                   | 281 | 1.56E-35 | 71.30% | 0.284   | PR00421 (PRINTS); IPR012336 (G3DSA:3.40.30.GENE3D); IPR013766 (PFAM); PTHR10438:SF235 (PANTHER); IPR005746 (PANTHER); TRANSMEMBRANE (PHOBIUS); NON_CYTOPLASMIC_DOMAIN (PHOBIUS); TRANSMEMBRANE (PHOBIUS); CYTOPLASMIC_DOMAIN (PHOBIUS); CYTOPLASMIC_DOMAIN (PHOBIUS); IPR012336 (PROSITE_PROFILES); IPR012336 (SUPERFAMILY); TMhelix (TMHMM); TMhelix (TMHMM)                                                                                                                                                                      |
| 883 | 440477_length_843_cvg_5.9_tip_1_2  | 18  | zinc finger protein 226-like    | 281 | 6.58E-43 | 57.00% | 0.099   | IPR015880 (SMART); IPR013087 (G3DSA:3.30.160.GENE3D); IPR013087 (G3DSA:3.30.160.GENE3D); PF13465 (PFAM); IPR007087 (PFAM); PTHR24409 (PANTHER); IPR007087 (PROSITE_PATTERNS); IPR007087 (PROSITE_PATTERNS); IPR007087 (PROSITE_PATTERNS); IPR007087 (PROSITE_PATTERNS); IPR007087 (PROSITE_PATTERNS); IPR007087 (PROSITE_PROFILES); IPR007087 (PROSITE_PROFILES); IPR007087 (PROSITE_PROFILES); IPR007087 (PROSITE_PROFILES); IPR007087 (PROSITE_PROFILES); SSF57667 (SUPERFAMILY); SSF57667 (SUPERFAMILY); SSF57667 (SUPERFAMILY) |
| 884 | 440519_length_843_cvg_59.8_tip_1_5 | 682 | lipophorin receptor isoform c   | 281 | 3.94E-13 | 54.60% | 0.476 Y | IPR002172 (PRINTS); IPR002172 (SMART); IPR002172 (G3DSA:4.10.400.GENE3D); IPR002172 (PFAM); IPR002172 (G3DSA:4.10.400.GENE3D); PTHR10529 (PANTHER); PTHR10529:SF208 (PANTHER); IPR023415 (PROSITE_PATTERNS); NON_CYTOPLASMIC_DOMAIN (PHOBIUS); TRANSMEMBRANE (PHOBIUS); CYTOPLASMIC_DOMAIN (PHOBIUS); IPR002172 (PROSITE_PROFILES); IPR002172 (PROSITE_PROFILES); IPR002172 (SUPERFAMILY); IPR002172 (SUPERFAMILY); TMhelix (TMHMM)                                                                                                |

|     |                                    |        |                                                   |     |           |        |       |                                                                                                                                                                                                                                                                                                                                                                                                                                            |
|-----|------------------------------------|--------|---------------------------------------------------|-----|-----------|--------|-------|--------------------------------------------------------------------------------------------------------------------------------------------------------------------------------------------------------------------------------------------------------------------------------------------------------------------------------------------------------------------------------------------------------------------------------------------|
| 885 | 440573_length_844_cvg_6.8_tip_1_2  | 19     | n-acetylglucosamine-6-sulfatase-like isoform x3   | 281 | 5.52E-98  | 71.90% | 0.206 | IPR017849 (G3DSA:3.40.720.GENE3D); IPR000917 (PFAM); PTHR10342:SF208 (PANTHER); PTHR10342 (PANTHER); IPR024607 (PROSITE_PATTERNS); NON_CYTOPLASMIC_DOMAIN (PHOBIUS); TRANSMEMBRANE (PHOBIUS); CYTOPLASMIC_DOMAIN (PHOBIUS); IPR017850 (SUPERFAMILY); TMhelix (TMHMM)                                                                                                                                                                       |
| 886 | 440625_length_844_cvg_4.9_tip_1_5  | 16     | variable charge x-linked protein 3b               | 281 | 2.27E-10  | 58.10% | 0.258 | no IPS match                                                                                                                                                                                                                                                                                                                                                                                                                               |
| 887 | 440641_length_844_cvg_36.4_tip_0_5 | 119    | acyl- delta desaturase                            | 281 | 7.07E-118 | 82.70% | 0.108 | IPR015876 (PRINTS); IPR005804 (PFAM); PTHR11351:SF28 (PANTHER); PTHR11351 (PANTHER); CYTOPLASMIC_DOMAIN (PHOBIUS); TRANSMEMBRANE (PHOBIUS); NON_CYTOPLASMIC_DOMAIN (PHOBIUS); NON_CYTOPLASMIC_DOMAIN (PHOBIUS); TRANSMEMBRANE (PHOBIUS); TRANSMEMBRANE (PHOBIUS); CYTOPLASMIC_DOMAIN (PHOBIUS); TMhelix (TMHMM); TMhelix (TMHMM); TMhelix (TMHMM)                                                                                          |
| 888 | 440795_length_845_cvg_5.0_tip_1_5  | 18     | cyclin-dependent kinase 6                         | 281 | 3.82E-132 | 79.20% | 0.096 | IPR002290 (SMART); IPR000719 (PFAM); G3DSA:1.10.510.10 (GENE3D); G3DSA:3.30.200.20 (GENE3D); PTHR24056:SF180 (PANTHER); PTHR24056 (PANTHER); IPR008271 (PROSITE_PATTERNS); IPR017441 (PROSITE_PATTERNS); IPR000719 (PROSITE_PROFILES); IPR011009 (SUPERFAMILY)                                                                                                                                                                             |
| 905 | 443797_length_866_cvg_14.9_tip_1_2 | 61     | otogelin-like protein                             | 281 | 2.65E-09  | 44.10% | 0.101 | no IPS match                                                                                                                                                                                                                                                                                                                                                                                                                               |
| 889 | 440897_length_846_cvg_4.1_tip_1_5  | 14     | dehydrogenase reductase sdr family protein 7-like | 282 | 1.09E-101 | 78.40% | 0.293 | IPR002347 (PRINTS); IPR002198 (PRINTS); IPR016040 (G3DSA:3.40.50.GENE3D); IPR002198 (PFAM); PTHR24322:SF325 (PANTHER); PTHR24322 (PANTHER); IPR020904 (PROSITE_PATTERNS); CYTOPLASMIC_DOMAIN (PHOBIUS); TRANSMEMBRANE (PHOBIUS); NON_CYTOPLASMIC_DOMAIN (PHOBIUS); SSF51735 (SUPERFAMILY); TMhelix (TMHMM)                                                                                                                                 |
| 890 | 441101_length_848_cvg_64.9_tip_0_0 | 226    | zinc finger protein gfi-1b                        | 283 | 2.38E-22  | 55.40% | 0.104 | IPR015880 (SMART); IPR007087 (PFAM); IPR013087 (G3DSA:3.30.160.GENE3D); IPR013087 (G3DSA:3.30.160.GENE3D); PF13465 (PFAM); PTHR24409:SF14 (PANTHER); PTHR24409 (PANTHER); IPR007087 (PROSITE_PATTERNS); IPR007087 (PROSITE_PATTERNS); IPR007087 (PROSITE_PATTERNS); IPR007087 (PROSITE_PROFILES); IPR007087 (PROSITE_PROFILES); IPR007087 (PROSITE_PROFILES); IPR007087 (PROSITE_PROFILES); SSF57667 (SUPERFAMILY); SSF57667 (SUPERFAMILY) |
| 891 | 441257_length_849_cvg_4.0_tip_1_4  | 22     | protein cbg17465                                  | 283 | 9.56E-07  | 55.33% | 0.122 | no IPS match                                                                                                                                                                                                                                                                                                                                                                                                                               |
| 892 | 441267_length_849_cvg_4.5_tip_1_2  | 18     | c4b-binding protein beta                          | 283 | 1.31E-119 | 77.10% | 0.11  | IPR000436 (SMART); IPR000436 (PFAM); G3DSA:2.10.70.10 (GENE3D); G3DSA:2.10.70.10 (GENE3D); PTHR19325 (PANTHER); PTHR19325:SF312 (PANTHER); IPR000436 (PROSITE_PROFILES); IPR000436 (PROSITE_PROFILES); IPR000436 (PROSITE_PROFILES); IPR000436 (PROSITE_PROFILES); IPR000436 (SUPERFAMILY); IPR000436 (SUPERFAMILY); IPR000436 (SUPERFAMILY); IPR000436 (SUPERFAMILY)                                                                      |
| 893 | 441805_length_852_cvg_2.2_tip_1_5  | 13     | serine partial                                    | 284 | 1.49E-36  | 63.10% | 0.107 | IPR001563 (PFAM); IPR029058 (G3DSA:3.40.50.GENE3D); IPR001563 (PANTHER); PTHR11802:SF30 (PANTHER); IPR029058 (SUPERFAMILY)                                                                                                                                                                                                                                                                                                                 |
| 894 | 441891_length_853_cvg_2.0_tip_1_0  | 6      | epsilon-sarcoglycan isoform x2                    | 285 | 1.25E-60  | 65.50% | 0.113 | IPR001304 (PFAM); IPR008908 (PFAM); IPR016186 (G3DSA:3.10.100.GENE3D); IPR008908 (PANTHER); PTHR10132:SF14 (PANTHER); TRANSMEMBRANE (PHOBIUS); CYTOPLASMIC_DOMAIN (PHOBIUS); NON_CYTOPLASMIC_DOMAIN (PHOBIUS); IPR001304 (PROSITE_PROFILES); IPR016187 (SUPERFAMILY); TMhelix (TMHMM)                                                                                                                                                      |
| 895 | 441955_length_853_cvg_3.8_tip_1_0  | 13     | thioredoxin domain-containing protein 11          | 285 | 1.46E-38  | 54.80% | 0.129 | IPR012336 (G3DSA:3.40.30.GENE3D); IPR013766 (PFAM); PTHR18929:SF61 (PANTHER); PTHR18929 (PANTHER); IPR012336 (SUPERFAMILY); TMhelix (TMHMM)                                                                                                                                                                                                                                                                                                |
| 897 | 442037_length_854_cvg_7.7_tip_1_0  | 19     | chorion peroxidase-like                           | 285 | 1.11E-101 | 68.50% | 0.139 | IPR019791 (PRINTS); IPR019791 (PFAM); IPR019791 (G3DSA:1.10.640.GENE3D); PTHR11475 (PANTHER); IPR019791 (PROSITE_PROFILES); IPR010255 (SUPERFAMILY)                                                                                                                                                                                                                                                                                        |
| 898 | 442107_length_855_cvg_79.0_tip_0_2 | 212877 | plasma kallikrein                                 | 285 | 4.96E-48  | 55.90% | 0.124 | IPR001314 (PRINTS); IPR001254 (SMART); IPR001254 (PFAM); G3DSA:2.40.10.10 (GENE3D); G3DSA:2.40.10.10 (GENE3D); PTHR24265 (PANTHER); IPR018114 (PROSITE_PATTERNS); IPR018114 (PROSITE_PATTERNS); IPR001254 (PROSITE_PROFILES); IPR009003 (SUPERFAMILY)                                                                                                                                                                                      |
| 899 | 442159_length_855_cvg_4.3_tip_1_2  | 16     | collagen alpha-1 chain-like                       | 285 | 1.81E-87  | 81.60% | 0.127 | IPR000885 (SMART); IPR000885 (PFAM); PTHR24023 (PANTHER); PTHR24023:SF444 (PANTHER); TRANSMEMBRANE (PHOBIUS); NON_CYTOPLASMIC_DOMAIN (PHOBIUS); TRANSMEMBRANE (PHOBIUS); NON_CYTOPLASMIC_DOMAIN (PHOBIUS); CYTOPLASMIC_DOMAIN (PHOBIUS); CYTOPLASMIC_DOMAIN (PHOBIUS); TRANSMEMBRANE (PHOBIUS); IPR000885 (PRODOM); IPR000885 (PROSITE_PROFILES); TMhelix (TMHMM); TMhelix (TMHMM); TMhelix (TMHMM)                                        |
| 900 | 442625_length_858_cvg_8.1_tip_1_1  | 23     | hypothetical protein L798_15262                   | 286 | 4.89E-12  | 77.00% | 0.334 | IPR029245 (PFAM)                                                                                                                                                                                                                                                                                                                                                                                                                           |



|     |                                    |       |                                            |     |           |        |         |                                                                                                                                                                                                                                                                                                                                                                                                                                                                                                                                                                                                                                                                       |
|-----|------------------------------------|-------|--------------------------------------------|-----|-----------|--------|---------|-----------------------------------------------------------------------------------------------------------------------------------------------------------------------------------------------------------------------------------------------------------------------------------------------------------------------------------------------------------------------------------------------------------------------------------------------------------------------------------------------------------------------------------------------------------------------------------------------------------------------------------------------------------------------|
| 909 | 444575_length_871_cvg_4.5_tip_1_2  | 21    | calumenin                                  | 290 | 4.65E-14  | 85.10% | 0.429 Y | IPR011992 (G3DSA:1.10.238.GENE3D); IPR018247 (PROSITE_PATTERNS); NON_CYTOPLASMIC_DOMAIN (PHOBIUS); TRANSMEMBRANE (PHOBIUS); NON_CYTOPLASMIC_DOMAIN (PHOBIUS); TRANSMEMBRANE (PHOBIUS); CYTOPLASMIC_DOMAIN (PHOBIUS); TRANSMEMBRANE (PHOBIUS); CYTOPLASMIC_DOMAIN (PHOBIUS); TMhelix (TMHMM)                                                                                                                                                                                                                                                                                                                                                                           |
| 911 | 444933_length_874_cvg_51.0_tip_1_3 | 145   | adp-ribosylation factor-like protein 16    | 292 | 1.30E-41  | 67.80% | 0.145   | IPR006687 (SMART); IPR024156 (SMART); IPR027417 (G3DSA:3.40.50.GENE3D); IPR006689 (PFAM); PTHR11711 (PANTHER); PTHR11711:SF42 (PANTHER); IPR024156 (PROSITE_PROFILES); IPR027417 (SUPERFAMILY)                                                                                                                                                                                                                                                                                                                                                                                                                                                                        |
| 912 | 445613_length_879_cvg_4.8_tip_1_2  | 15    | zinc finger protein                        | 293 | 3.06E-42  | 54.50% | 0.1     | IPR015880 (SMART); IPR013087 (G3DSA:3.30.160.GENE3D); IPR013087 (G3DSA:3.30.160.GENE3D); PF13894 (PFAM); IPR007087 (PFAM); PF13465 (PFAM); IPR013087 (G3DSA:3.30.160.GENE3D); PTHR24409:SF14 (PANTHER); PTHR24409 (PANTHER); IPR007087 (PROSITE_PATTERNS); IPR007087 (PROSITE_PATTERNS); IPR007087 (PROSITE_PATTERNS); IPR007087 (PROSITE_PATTERNS); IPR007087 (PROSITE_PATTERNS); IPR007087 (PROSITE_PROFILES); IPR007087 (PROSITE_PROFILES); IPR007087 (PROSITE_PROFILES); IPR007087 (PROSITE_PROFILES); IPR007087 (PROSITE_PROFILES); IPR007087 (PROSITE_PROFILES); SSF57667 (SUPERFAMILY); SSF57667 (SUPERFAMILY); SSF57667 (SUPERFAMILY); SSF57667 (SUPERFAMILY) |
| 913 | 445673_length_880_cvg_9.3_tip_1_2  | 39    | hypothetical protein BRAFLDRAFT_125057     | 293 | 7.15E-09  | 46.00% | 0.112   | no IPS match                                                                                                                                                                                                                                                                                                                                                                                                                                                                                                                                                                                                                                                          |
| 938 | 448897_length_906_cvg_9.8_tip_1_3  | 53    | spermatogenesis-associated protein 5       | 293 | 4.49E-141 | 82.30% | 0.104   | Coil (COILS); IPR003593 (SMART); G3DSA:1.10.8.60 (GENE3D); IPR003959 (PFAM); IPR027417 (G3DSA:3.40.50.GENE3D); PTHR23077:SF27 (PANTHER); PTHR23077 (PANTHER); IPR003960 (PROSITE_PATTERNS); IPR027417 (SUPERFAMILY)                                                                                                                                                                                                                                                                                                                                                                                                                                                   |
| 914 | 445711_length_880_cvg_56.5_tip_1_0 | 461   | ecdysteroid-regulated 16 kda protein       | 294 | 1.42E-17  | 54.20% | 0.393 Y | IPR003172 (SMART); IPR003172 (PFAM); IPR003172 (G3DSA:2.60.40.GENE3D); PTHR11306 (PANTHER); IPR014756 (SUPERFAMILY)                                                                                                                                                                                                                                                                                                                                                                                                                                                                                                                                                   |
| 915 | 445811_length_881_cvg_6.8_tip_1_4  | 28    | alcohol dehydrogenase                      | 294 | 1.44E-58  | 65.90% | 0.16    | IPR020471 (PRINTS); IPR023210 (G3DSA:3.20.20.GENE3D); IPR023210 (PFAM); PTHR11732:SF183 (PANTHER); IPR001395 (PANTHER); IPR018170 (PROSITE_PATTERNS); IPR018170 (PROSITE_PATTERNS); TRANSMEMBRANE (PHOBIUS); CYTOPLASMIC_DOMAIN (PHOBIUS); NON_CYTOPLASMIC_DOMAIN (PHOBIUS); IPR023210 (SUPERFAMILY); TMhelix (TMHMM)                                                                                                                                                                                                                                                                                                                                                 |
| 916 | 445989_length_882_cvg_17.7_tip_1_2 | 68    | adp-ribosylation factor-like protein 2     | 294 | 4.78E-109 | 93.70% | 0.551 Y | IPR006689 (PRINTS); IPR003579 (SMART); IPR006687 (SMART); IPR024156 (SMART); IPR005225 (TIGRFAM); IPR027417 (G3DSA:3.40.50.GENE3D); IPR006689 (PFAM); PTHR11711:SF26 (PANTHER); PTHR11711 (PANTHER); NON_CYTOPLASMIC_DOMAIN (PHOBIUS); TRANSMEMBRANE (PHOBIUS); CYTOPLASMIC_DOMAIN (PHOBIUS); IPR024156 (PROSITE_PROFILES); SignalP-TM (SIGNALP_EUK); IPR027417 (SUPERFAMILY); TMhelix (TMHMM)                                                                                                                                                                                                                                                                        |
| 936 | 448597_length_903_cvg_3.0_tip_1_1  | 14    | striatin- partial                          | 294 | 2.49E-140 | 88.60% | 0.118   | IPR001680 (SMART); IPR001680 (PFAM); IPR015943 (G3DSA:2.130.10.GENE3D); PTHR15653 (PANTHER); IPR019775 (PROSITE_PATTERNS); TRANSMEMBRANE (PHOBIUS); CYTOPLASMIC_DOMAIN (PHOBIUS); CYTOPLASMIC_DOMAIN (PHOBIUS); NON_CYTOPLASMIC_DOMAIN (PHOBIUS); TRANSMEMBRANE (PHOBIUS); IPR001680 (PROSITE_PROFILES); IPR017986 (PROSITE_PROFILES); IPR001680 (PROSITE_PROFILES); IPR017986 (SUPERFAMILY); TMhelix (TMHMM)                                                                                                                                                                                                                                                         |
| 954 | 451101_length_924_cvg_63.3_tip_1_5 | 23025 | translationally-controlled tumor protein   | 294 | 4.03E-71  | 79.40% | 0.274   | IPR018105 (PRINTS); IPR018105 (PFAM); IPR011323 (G3DSA:2.170.150.GENE3D); IPR018105 (PANTHER); IPR011057 (SUPERFAMILY)                                                                                                                                                                                                                                                                                                                                                                                                                                                                                                                                                |
| 917 | 446083_length_883_cvg_4.0_tip_1_3  | 14    | lipophorin receptor                        | 295 | 2.88E-28  | 71.80% | 0.323   | IPR002172 (PRINTS); IPR002172 (SMART); IPR002172 (PFAM); IPR002172 (G3DSA:4.10.400.GENE3D); PTHR10529 (PANTHER); IPR023415 (PROSITE_PATTERNS); IPR023415 (PROSITE_PATTERNS); IPR002172 (PROSITE_PROFILES); IPR002172 (PROSITE_PROFILES); IPR002172 (SUPERFAMILY); IPR002172 (SUPERFAMILY)                                                                                                                                                                                                                                                                                                                                                                             |
| 918 | 446161_length_883_cvg_4.3_tip_1_0  | 13    | peptidyl-prolyl cis-trans isomerase-like 2 | 295 | 7.36E-141 | 79.50% | 0.102   | Coil (COILS); IPR002130 (PRINTS); IPR002130 (PFAM); IPR029000 (G3DSA:2.40.100.GENE3D); IPR024936 (PANTHER); PTHR11071:SF147 (PANTHER); IPR020892 (PROSITE_PATTERNS); IPR002130 (PROSITE_PROFILES); IPR029000 (SUPERFAMILY)                                                                                                                                                                                                                                                                                                                                                                                                                                            |
| 923 | 446629_length_887_cvg_7.0_tip_1_5  | 23    | venom dipeptidyl peptidase 4 isoform x3    | 295 | 1.03E-26  | 71.40% | 0.103   | IPR029058 (G3DSA:3.40.50.GENE3D); IPR001375 (PFAM); PTHR11731:SF93 (PANTHER); PTHR11731 (PANTHER); CYTOPLASMIC_DOMAIN (PHOBIUS); TRANSMEMBRANE (PHOBIUS); NON_CYTOPLASMIC_DOMAIN (PHOBIUS); IPR029058 (SUPERFAMILY)                                                                                                                                                                                                                                                                                                                                                                                                                                                   |
| 922 | 446575_length_886_cvg_5.2_tip_1_0  | 23    | nucleobindin-2-like isoform x5             | 296 | 3.03E-54  | 74.10% | 0.103   | IPR011992 (PFAM); IPR011992 (G3DSA:1.10.238.GENE3D); PTHR19237 (PANTHER); PTHR19237:SF20 (PANTHER); IPR018247 (PROSITE_PATTERNS); IPR002048 (PROSITE_PROFILES); IPR002048 (PROSITE_PROFILES); SSF47473 (SUPERFAMILY)                                                                                                                                                                                                                                                                                                                                                                                                                                                  |



|     |                                    |      |                                                                  |     |           |         |         |                                                                                                                                                                                                                                                                                                                                                                                                                                                                                                                                                                                                                                     |
|-----|------------------------------------|------|------------------------------------------------------------------|-----|-----------|---------|---------|-------------------------------------------------------------------------------------------------------------------------------------------------------------------------------------------------------------------------------------------------------------------------------------------------------------------------------------------------------------------------------------------------------------------------------------------------------------------------------------------------------------------------------------------------------------------------------------------------------------------------------------|
| 924 | 446803_length_889_cvg_3.9_tip_1_4  | 19   | immunoglobulin-like and fibronectin type iii domain containing 7 | 296 | 7.97E-18  | 55.90%  | 0.156   | IPR026966 (PFAM); PTHR10489 (PANTHER); PTHR10489:SF553 (PANTHER); NON_CYTOPLASMIC_DOMAIN (PHOBIUS); CYTOPLASMIC_DOMAIN (PHOBIUS); CYTOPLASMIC_DOMAIN (PHOBIUS); TRANSMEMBRANE (PHOBIUS); TRANSMEMBRANE (PHOBIUS); TMhelix (TMHMM); TMhelix (TMHMM)                                                                                                                                                                                                                                                                                                                                                                                  |
| 925 | 446805_length_889_cvg_16.9_tip_1_1 | 61   | calnexin-like isoform x2                                         | 296 | 1.89E-91  | 78.50%  | 0.102   | IPR001580 (PRINTS); IPR013320 (G3DSA:2.60.120.GENE3D); IPR001580 (PFAM); PTHR11073:SF1 (PANTHER); IPR001580 (PANTHER); IPR018124 (PROSITE_PATTERNS); IPR013320 (SUPERFAMILY)                                                                                                                                                                                                                                                                                                                                                                                                                                                        |
| 927 | 446899_length_889_cvg_5.9_tip_1_2  | 32   | tyrosine-protein kinase receptor tie-1                           | 296 | 1.69E-18  | 57.90%  | 0.185   | G3DSA:2.170.300.10 (GENE3D); PTHR24416:SF125 (PANTHER); PTHR24416 (PANTHER); CYTOPLASMIC_DOMAIN (PHOBIUS); TRANSMEMBRANE (PHOBIUS); NON_CYTOPLASMIC_DOMAIN (PHOBIUS); IPR003961 (SUPERFAMILY); TMhelix (TMHMM); TMhelix (TMHMM)                                                                                                                                                                                                                                                                                                                                                                                                     |
| 926 | 446897_length_889_cvg_18.1_tip_1_3 | 63   | hemagglutinin amebocyte aggregation factor-like                  | 297 | 1.29E-29  | 57.60%  | 0.269   | PF14704 (PFAM); IPR026645 (PANTHER); TRANSMEMBRANE (PHOBIUS); TRANSMEMBRANE (PHOBIUS); NON_CYTOPLASMIC_DOMAIN (PHOBIUS); NON_CYTOPLASMIC_DOMAIN (PHOBIUS); CYTOPLASMIC_DOMAIN (PHOBIUS); CYTOPLASMIC_DOMAIN (PHOBIUS); TRANSMEMBRANE (PHOBIUS)                                                                                                                                                                                                                                                                                                                                                                                      |
| 928 | 447037_length_890_cvg_4.7_tip_1_0  | 21   | zinc finger protein 420-like                                     | 297 | 3.48E-41  | 56.80%  | 0.107   | IPR015880 (SMART); IPR013087 (G3DSA:3.30.160.GENE3D); IPR013087 (G3DSA:3.30.160.GENE3D); IPR013087 (G3DSA:3.30.160.GENE3D); PF13465 (PFAM); PTHR24409:SF13 (PANTHER); PTHR24409 (PANTHER); IPR007087 (PROSITE_PATTERNS); IPR007087 (PROSITE_PATTERNS); IPR007087 (PROSITE_PATTERNS); IPR007087 (PROSITE_PATTERNS); IPR007087 (PROSITE_PATTERNS); IPR007087 (PROSITE_PROFILES); IPR007087 (PROSITE_PROFILES); IPR007087 (PROSITE_PROFILES); IPR007087 (PROSITE_PROFILES); IPR007087 (PROSITE_PROFILES); IPR007087 (PROSITE_PROFILES); SSF57667 (SUPERFAMILY); SSF57667 (SUPERFAMILY); SSF57667 (SUPERFAMILY); SSF57667 (SUPERFAMILY) |
| 931 | 447621_length_895_cvg_42.7_tip_1_1 | 131  | protein shifted isoform x1                                       | 298 | 7.43E-81  | 87.70%  | 0.145   | IPR013309 (PRINTS); IPR003306 (SMART); IPR003306 (PFAM); PTHR24838 (PANTHER); PTHR24838:SF276 (PANTHER); TRANSMEMBRANE (PHOBIUS); CYTOPLASMIC_DOMAIN (PHOBIUS); NON_CYTOPLASMIC_DOMAIN (PHOBIUS); IPR003306 (PRODOM); IPR003306 (PROSITE_PROFILES); TMhelix (TMHMM)                                                                                                                                                                                                                                                                                                                                                                 |
| 932 | 447653_length_895_cvg_59.9_tip_1_2 | 7269 | plasma kallikrein                                                | 298 | 7.74E-38  | 54.10%  | 0.214   | IPR001314 (PRINTS); IPR001254 (SMART); G3DSA:2.40.10.10 (GENE3D); G3DSA:2.40.10.10 (GENE3D); G3DSA:2.40.10.10 (GENE3D); PTHR24265 (PANTHER); IPR018114 (PROSITE_PATTERNS); IPR018114 (PROSITE_PATTERNS); TRANSMEMBRANE (PHOBIUS); NON_CYTOPLASMIC_DOMAIN (PHOBIUS); CYTOPLASMIC_DOMAIN (PHOBIUS); IPR001254 (PROSITE_PROFILES); IPR009003 (SUPERFAMILY)                                                                                                                                                                                                                                                                             |
| 933 | 447777_length_896_cvg_10.6_tip_1_5 | 36   | stromal cell-derived factor 2                                    | 298 | 5.28E-95  | 75.50%  | 0.448 Y | IPR016093 (SMART); IPR016093 (PFAM); G3DSA:2.80.10.50 (GENE3D); IPR027005 (PANTHER); CYTOPLASMIC_DOMAIN (PHOBIUS); NON_CYTOPLASMIC_DOMAIN (PHOBIUS); TRANSMEMBRANE (PHOBIUS); IPR016093 (PROSITE_PROFILES); IPR016093 (PROSITE_PROFILES); IPR016093 (PROSITE_PROFILES); SignalP-TM (SIGNALP_GRAM_POSITIVE); IPR016093 (SUPERFAMILY)                                                                                                                                                                                                                                                                                                 |
| 949 | 450611_length_920_cvg_9.8_tip_1_2  | 36   | nad h-hydrate epimerase-like                                     | 299 | 1.33E-109 | 77.00%  | 0.195   | IPR004443 (G3DSA:3.40.50.GENE3D); IPR004443 (PFAM); IPR004443 (TIGRFAM); PTHR13232 (PANTHER); IPR004443 (PROSITE_PROFILES); IPR004443 (HAMAP); IPR004443 (SUPERFAMILY)                                                                                                                                                                                                                                                                                                                                                                                                                                                              |
| 934 | 448147_length_899_cvg_5.0_tip_1_3  | 18   | cathepsin l-associated protein                                   | 300 | 2.63E-62  | 59.40%  | 0.510 Y | IPR000782 (SMART); IPR000782 (G3DSA:2.30.180.GENE3D); IPR000782 (G3DSA:2.30.180.GENE3D); IPR000782 (PFAM); PTHR10900 (PANTHER); SIGNAL_PEPTIDE (PHOBIUS); SIGNAL_PEPTIDE_C_REGION (PHOBIUS); SIGNAL_PEPTIDE_H_REGION (PHOBIUS); NON_CYTOPLASMIC_DOMAIN (PHOBIUS); SIGNAL_PEPTIDE_N_REGION (PHOBIUS); IPR000782 (PROSITE_PROFILES); IPR000782 (PROSITE_PROFILES); SignalP-TM (SIGNALP_EUK); IPR000782 (SUPERFAMILY); IPR000782 (SUPERFAMILY); TMhelix (TMHMM)                                                                                                                                                                        |
| 935 | 448499_length_902_cvg_2.0_tip_1_4  | 7    | glucose partial                                                  | 301 | 0         | 100.00% | 0.149   | IPR018391 (SMART); IPR027295 (G3DSA:2.140.10.GENE3D); PF13360 (PFAM); IPR002372 (PFAM); PTHR32303 (PANTHER); PTHR32303:SF2 (PANTHER); IPR001479 (PROSITE_PATTERNS); IPR011047 (SUPERFAMILY)                                                                                                                                                                                                                                                                                                                                                                                                                                         |
| 937 | 448643_length_904_cvg_49.6_tip_1_0 | 191  | serine protease inhibitor kazal-type 6-like isoform x1           | 302 | 4.25E-09  | 61.43%  | 0.614 Y | IPR002350 (SMART); G3DSA:3.30.60.30 (GENE3D); IPR002350 (PFAM); IPR002350 (PROSITE_PATTERNS); TRANSMEMBRANE (PHOBIUS); NON_CYTOPLASMIC_DOMAIN (PHOBIUS); TRANSMEMBRANE (PHOBIUS); CYTOPLASMIC_DOMAIN (PHOBIUS); CYTOPLASMIC_DOMAIN (PHOBIUS); NON_CYTOPLASMIC_DOMAIN (PHOBIUS); TRANSMEMBRANE (PHOBIUS); IPR002350 (PROSITE_PROFILES); SignalP-noTM (SIGNALP_EUK); SSF100895 (SUPERFAMILY); TMhelix (TMHMM); TMhelix (TMHMM)                                                                                                                                                                                                        |

|     |                                    |     |                                               |     |           |        |       |                                                                                                                                                                                                                                                                                                                                                                                                                                                                                                                                                                                                                 |
|-----|------------------------------------|-----|-----------------------------------------------|-----|-----------|--------|-------|-----------------------------------------------------------------------------------------------------------------------------------------------------------------------------------------------------------------------------------------------------------------------------------------------------------------------------------------------------------------------------------------------------------------------------------------------------------------------------------------------------------------------------------------------------------------------------------------------------------------|
| 939 | 449317_length_909_cvg_3.4_tip_1_2  | 19  | serine proteinase                             | 303 | 1.72E-40  | 50.70% | 0.246 | IPR001314 (PRINTS); IPR001254 (SMART); G3DSA:2.40.10.10 (GENE3D); G3DSA:2.40.10.10 (GENE3D); IPR001254 (PFAM); G3DSA:2.40.10.10 (GENE3D); PTHR24260 (PANTHER); IPR018114 (PROSITE_PATTERNS); NON_CYTOPLASMIC_DOMAIN (PHOBIUS); NON_CYTOPLASMIC_DOMAIN (PHOBIUS); TRANSMEMBRANE (PHOBIUS); CYTOPLASMIC_DOMAIN (PHOBIUS); TRANSMEMBRANE (PHOBIUS); IPR001254 (PROSITE_PROFILES); IPR009003 (SUPERFAMILY)                                                                                                                                                                                                          |
| 940 | 449371_length_910_cvg_2.6_tip_1_5  | 8   | ecdysis triggering hormone receptor isoform a | 303 | 8.02E-71  | 81.80% | 0.1   | IPR000276 (PRINTS); IPR000276 (PFAM); G3DSA:1.20.1070.10 (GENE3D); PTHR24243 (PANTHER); PTHR24243:SF102 (PANTHER); IPR000276 (PROSITE_PATTERNS); NON_CYTOPLASMIC_DOMAIN (PHOBIUS); NON_CYTOPLASMIC_DOMAIN (PHOBIUS); TRANSMEMBRANE (PHOBIUS); CYTOPLASMIC_DOMAIN (PHOBIUS); TRANSMEMBRANE (PHOBIUS); NON_CYTOPLASMIC_DOMAIN (PHOBIUS); TRANSMEMBRANE (PHOBIUS); CYTOPLASMIC_DOMAIN (PHOBIUS); TRANSMEMBRANE (PHOBIUS); IPR017452 (PROSITE_PROFILES); SSF81321 (SUPERFAMILY); TMhelix (TMHMM); TMhelix (TMHMM); TMhelix (TMHMM)                                                                                  |
| 941 | 449375_length_910_cvg_3.0_tip_1_2  | 10  | serine-aspartate repeat protein f             | 303 | 2.09E-18  | 42.80% | 0.363 | Y no IPS match                                                                                                                                                                                                                                                                                                                                                                                                                                                                                                                                                                                                  |
| 943 | 449375_length_910_cvg_3.0_tip_1_5  | 10  | collagen alpha-1 chain                        | 303 | 3.84E-16  | 60.20% | 0.114 | IPR008160 (PFAM)                                                                                                                                                                                                                                                                                                                                                                                                                                                                                                                                                                                                |
| 942 | 449375_length_910_cvg_3.0_tip_1_3  | 10  | collagen alpha-1 chain                        | 304 | 3.28E-20  | 58.60% | 0.101 | IPR008160 (PFAM); PTHR24023:SF372 (PANTHER); PTHR24023 (PANTHER)                                                                                                                                                                                                                                                                                                                                                                                                                                                                                                                                                |
| 944 | 449511_length_911_cvg_20.1_tip_1_0 | 77  | zinc finger protein                           | 304 | 4.50E-30  | 54.20% | 0.113 | IPR015880 (SMART); IPR013087 (G3DSA:3.30.160.GENE3D); IPR013087 (G3DSA:3.30.160.GENE3D); PF13465 (PFAM); PF13894 (PFAM); IPR007087 (PFAM); IPR013087 (G3DSA:3.30.160.GENE3D); PTHR24409 (PANTHER); PTHR24409:SF14 (PANTHER); IPR007087 (PROSITE_PATTERNS); IPR007087 (PROSITE_PATTERNS); IPR007087 (PROSITE_PATTERNS); IPR007087 (PROSITE_PATTERNS); IPR007087 (PROSITE_PROFILES); IPR007087 (PROSITE_PROFILES); IPR007087 (PROSITE_PROFILES); IPR007087 (PROSITE_PROFILES); IPR007087 (PROSITE_PROFILES); IPR007087 (PROSITE_PROFILES); SSF57667 (SUPERFAMILY); SSF57667 (SUPERFAMILY); SSF57667 (SUPERFAMILY) |
| 945 | 449841_length_914_cvg_5.1_tip_1_1  | 25  | carbonyl reductase                            | 305 | 1.30E-123 | 74.60% | 0.121 | IPR002347 (PRINTS); IPR002198 (PFAM); IPR016040 (G3DSA:3.40.50.GENE3D); PTHR24322 (PANTHER); PTHR24322:SF58 (PANTHER); SSF51735 (SUPERFAMILY)                                                                                                                                                                                                                                                                                                                                                                                                                                                                   |
| 946 | 450099_length_916_cvg_64.1_tip_1_1 | 867 | glutathione peroxidase 7                      | 305 | 2.61E-75  | 71.00% | 0.168 | IPR000889 (PRINTS); IPR000889 (PFAM); IPR012336 (G3DSA:3.40.30.GENE3D); IPR000889 (PANTHER); PTHR11592:SF10 (PANTHER); IPR029759 (PROSITE_PATTERNS); IPR029760 (PROSITE_PATTERNS); CYTOPLASMIC_DOMAIN (PHOBIUS); NON_CYTOPLASMIC_DOMAIN (PHOBIUS); TRANSMEMBRANE (PHOBIUS); IPR000889 (PROSITE_PROFILES); IPR012336 (SUPERFAMILY); TMhelix (TMHMM)                                                                                                                                                                                                                                                              |
| 947 | 450357_length_918_cvg_4.3_tip_1_2  | 16  | retinol dehydrogenase 13-like                 | 306 | 7.66E-32  | 74.60% | 0.134 | PTHR24320:SF55 (PANTHER); PTHR24320 (PANTHER); CYTOPLASMIC_DOMAIN (PHOBIUS); NON_CYTOPLASMIC_DOMAIN (PHOBIUS); TRANSMEMBRANE (PHOBIUS); TRANSMEMBRANE (PHOBIUS); NON_CYTOPLASMIC_DOMAIN (PHOBIUS); TMhelix (TMHMM); TMhelix (TMHMM)                                                                                                                                                                                                                                                                                                                                                                             |
| 948 | 450493_length_919_cvg_2.6_tip_1_1  | 10  | zinc finger protein                           | 306 | 3.51E-15  | 54.60% | 0.108 | IPR015880 (SMART); IPR013087 (G3DSA:3.30.160.GENE3D); PTHR24409:SF14 (PANTHER); PTHR24409 (PANTHER); IPR007087 (PROSITE_PATTERNS); IPR007087 (PROSITE_PATTERNS); IPR007087 (PROSITE_PATTERNS); IPR007087 (PROSITE_PATTERNS); IPR007087 (PROSITE_PROFILES); IPR007087 (PROSITE_PROFILES); IPR007087 (PROSITE_PROFILES); SSF57667 (SUPERFAMILY); SSF57667 (SUPERFAMILY)                                                                                                                                                                                                                                           |
| 950 | 450633_length_920_cvg_4.6_tip_1_0  | 25  | carboxypeptidase q isoform x2                 | 307 | 1.93E-93  | 74.80% | 0.262 | IPR003137 (PFAM); G3DSA:3.40.630.10 (GENE3D); PTHR12053 (PANTHER); TRANSMEMBRANE (PHOBIUS); NON_CYTOPLASMIC_DOMAIN (PHOBIUS); CYTOPLASMIC_DOMAIN (PHOBIUS); SSF53187 (SUPERFAMILY); TMhelix (TMHMM)                                                                                                                                                                                                                                                                                                                                                                                                             |
| 951 | 450693_length_921_cvg_11.6_tip_1_0 | 42  | zinc finger protein 420-like                  | 307 | 4.97E-18  | 44.30% | 0.1   | IPR015880 (SMART); IPR013087 (G3DSA:3.30.160.GENE3D); IPR013087 (G3DSA:3.30.160.GENE3D); PF13894 (PFAM); IPR007087 (PFAM); IPR013087 (G3DSA:3.30.160.GENE3D); PTHR24409 (PANTHER); PTHR24409:SF14 (PANTHER); IPR007087 (PROSITE_PATTERNS); IPR007087 (PROSITE_PATTERNS); IPR007087 (PROSITE_PATTERNS); IPR007087 (PROSITE_PATTERNS); IPR007087 (PROSITE_PROFILES); IPR007087 (PROSITE_PROFILES); IPR007087 (PROSITE_PROFILES); IPR007087 (PROSITE_PROFILES); IPR007087 (PROSITE_PROFILES); SSF57667 (SUPERFAMILY); SSF57667 (SUPERFAMILY); SSF57667 (SUPERFAMILY)                                               |



|     |                                    |     |                                             |     |           |        |         |                                                                                                                                                                                                                                                                                                                                                                                                                                                                                                                                                                                                                                                                             |
|-----|------------------------------------|-----|---------------------------------------------|-----|-----------|--------|---------|-----------------------------------------------------------------------------------------------------------------------------------------------------------------------------------------------------------------------------------------------------------------------------------------------------------------------------------------------------------------------------------------------------------------------------------------------------------------------------------------------------------------------------------------------------------------------------------------------------------------------------------------------------------------------------|
| 966 | 453228_length_943_cvg_5.4_tip_1_5  | 28  | wnt1-inducible-signaling pathway protein 3  | 314 | 8.68E-15  | 50.30% | 0.223   | IPR000867 (SMART); IPR000867 (PFAM); PTHR11348 (PANTHER); IPR000867 (PROSITE_PROFILES); IPR009030 (SUPERFAMILY)                                                                                                                                                                                                                                                                                                                                                                                                                                                                                                                                                             |
| 980 | 455475_length_964_cvg_12.4_tip_1_3 | 52  | adiponectin receptor protein                | 314 | 3.97E-21  | 77.70% | 0.101   | IPR004254 (PFAM); PTHR20855:Sf15 (PANTHER); IPR004254 (PANTHER); TRANSMEMBRANE (PHOBIUS); NON_CYTOPLASMIC_DOMAIN (PHOBIUS); TRANSMEMBRANE (PHOBIUS); CYTOPLASMIC_DOMAIN (PHOBIUS); CYTOPLASMIC_DOMAIN (PHOBIUS); TRANSMEMBRANE (PHOBIUS); NON_CYTOPLASMIC_DOMAIN (PHOBIUS); TRANSMEMBRANE (PHOBIUS); CYTOPLASMIC_DOMAIN (PHOBIUS); TMhelix (TMHMM); TMhelix (TMHMM); TMhelix (TMHMM); TMhelix (TMHMM)                                                                                                                                                                                                                                                                       |
| 965 | 453212_length_943_cvg_5.6_tip_1_3  | 32  | low quality protein: titin-like             | 315 | 1.55E-177 | 87.90% | 0.099   | IPR003598 (SMART); IPR003599 (SMART); IPR013783 (G3DSA:2.60.40.GENE3D); IPR013783 (G3DSA:2.60.40.GENE3D); IPR010939 (PFAM); IPR013098 (PFAM); IPR013783 (G3DSA:2.60.40.GENE3D); PTHR19897:Sf149 (PANTHER); PTHR19897 (PANTHER); IPR007110 (PROSITE_PROFILES); IPR007110 (PROSITE_PROFILES); SSF48726 (SUPERFAMILY); SSF48726 (SUPERFAMILY)                                                                                                                                                                                                                                                                                                                                  |
| 967 | 453368_length_944_cvg_7.0_tip_1_0  | 37  | thioredoxin-dependent peroxide reductase    | 315 | 4.63E-127 | 84.70% | 0.476 Y | IPR019479 (PFAM); IPR000866 (PFAM); IPR012336 (G3DSA:3.40.30.GENE3D); PTHR10681 (PANTHER); PTHR10681:Sf101 (PANTHER); SIGNAL_PEPTIDE_C_REGION (PHOBIUS); SIGNAL_PEPTIDE_N_REGION (PHOBIUS); SIGNAL_PEPTIDE_H_REGION (PHOBIUS); SIGNAL_PEPTIDE (PHOBIUS); NON_CYTOPLASMIC_DOMAIN (PHOBIUS); IPR012336 (PROSITE_PROFILES); SignalIP-noTM (SIGNALP_EUK); IPR012336 (SUPERFAMILY)                                                                                                                                                                                                                                                                                               |
| 968 | 453592_length_946_cvg_17.0_tip_1_5 | 66  | wd repeat domain 5                          | 315 | 6.32E-53  | 86.40% | 0.102   | IPR001680 (SMART); IPR001680 (PFAM); IPR015943 (G3DSA:2.130.10.GENE3D); PTHR22847:Sf308 (PANTHER); PTHR22847 (PANTHER); IPR019775 (PROSITE_PATTERNS); IPR001680 (PROSITE_PROFILES); IPR017986 (PROSITE_PROFILES); IPR001680 (PROSITE_PROFILES); IPR017986 (SUPERFAMILY)                                                                                                                                                                                                                                                                                                                                                                                                     |
| 969 | 453752_length_948_cvg_2.0_tip_1_3  | 10  | tyrosine-protein kinase hopscotch           | 316 | 1.36E-93  | 66.50% | 0.116   | IPR001245 (PRINTS); IPR020635 (SMART); G3DSA:3.30.200.20 (GENE3D); G3DSA:1.10.510.10 (GENE3D); IPR016253 (PIRSF); IPR001245 (PFAM); PTHR24418 (PANTHER); IPR017441 (PROSITE_PATTERNS); IPR008266 (PROSITE_PATTERNS); IPR000719 (PROSITE_PROFILES); IPR011009 (SUPERFAMILY)                                                                                                                                                                                                                                                                                                                                                                                                  |
| 970 | 454160_length_951_cvg_5.2_tip_1_0  | 16  | collagen triple helix repeat family protein | 317 | 2.17E-11  | 52.90% | 0.135   | no IPS match                                                                                                                                                                                                                                                                                                                                                                                                                                                                                                                                                                                                                                                                |
| 971 | 454160_length_951_cvg_5.2_tip_1_4  | 16  | pneumococcal surface protein c              | 317 | 3.41E-10  | 48.90% | 0.112   | no IPS match                                                                                                                                                                                                                                                                                                                                                                                                                                                                                                                                                                                                                                                                |
| 972 | 454174_length_951_cvg_40.2_tip_1_5 | 162 | casein kinase ii subunit alpha              | 317 | 0         | 96.10% | 0.098   | IPR002290 (SMART); IPR000719 (PFAM); G3DSA:1.10.510.10 (GENE3D); G3DSA:3.30.200.20 (GENE3D); PTHR24054:Sf28 (PANTHER); PTHR24054 (PANTHER); IPR017441 (PROSITE_PATTERNS); IPR008271 (PROSITE_PATTERNS); IPR000719 (PROSITE_PROFILES); IPR011009 (SUPERFAMILY)                                                                                                                                                                                                                                                                                                                                                                                                               |
| 973 | 454452_length_954_cvg_3.0_tip_1_5  | 19  | collagen alpha 1 chain                      | 318 | 9.92E-57  | 55.70% | 0.125   | IPR016186 (G3DSA:3.10.100.GENE3D); IPR010515 (PFAM); IPR026917 (PTHr24023:PANTHER); PTHr24023 (PANTHER); NON_CYTOPLASMIC_DOMAIN (PHOBIUS); CYTOPLASMIC_DOMAIN (PHOBIUS); TRANSMEMBRANE (PHOBIUS); IPR016187 (SUPERFAMILY); TMhelix (TMHMM)                                                                                                                                                                                                                                                                                                                                                                                                                                  |
| 974 | 454796_length_958_cvg_5.8_tip_1_5  | 23  | tyrosine-protein phosphatase 69d-like       | 319 | 6.36E-140 | 80.00% | 0.133   | IPR000242 (PRINTS); IPR000242 (SMART); IPR003595 (SMART); IPR000242 (PFAM); IPR029021 (G3DSA:3.90.190.GENE3D); IPR029021 (G3DSA:3.90.190.GENE3D); PTHR19134:Sf227 (PANTHER); PTHR19134 (PANTHER); IPR000242 (PROSITE_PROFILES); IPR000387 (PROSITE_PROFILES); IPR029021 (SUPERFAMILY)                                                                                                                                                                                                                                                                                                                                                                                       |
| 975 | 454810_length_958_cvg_12.8_tip_1_4 | 77  | stereocilin                                 | 319 | 5.83E-19  | 47.00% | 0.1     | IPR026061 (PTHr23412:PANTHER); IPR026664 (PANTHER); NON_CYTOPLASMIC_DOMAIN (PHOBIUS); TRANSMEMBRANE (PHOBIUS); CYTOPLASMIC_DOMAIN (PHOBIUS); TMhelix (TMHMM)                                                                                                                                                                                                                                                                                                                                                                                                                                                                                                                |
| 976 | 454903_length_959_cvg_4.2_tip_1_3  | 15  | zinc finger protein                         | 320 | 6.06E-45  | 57.40% | 0.1     | IPR015880 (SMART); IPR013087 (G3DSA:3.30.160.GENE3D); IPR007087 (PFAM); IPR013087 (G3DSA:3.30.160.GENE3D); IPR013087 (G3DSA:3.30.160.GENE3D); PF13894 (PFAM); PF13465 (PFAM); PTHR24409:Sf14 (PANTHER); PTHR24409 (PANTHER); IPR007087 (PROSITE_PATTERNS); IPR007087 (PROSITE_PATTERNS); IPR007087 (PROSITE_PATTERNS); IPR007087 (PROSITE_PATTERNS); IPR007087 (PROSITE_PATTERNS); IPR007087 (PROSITE_PROFILES); SSF57667 (SUPERFAMILY); SSF57667 (SUPERFAMILY); SSF57667 (SUPERFAMILY) |

|      |                                    |     |                                                                                |     |           |         |         |                                                                                                                                                                                                                                                                                                                                                                                                                                                                                                                                                                                                                                                           |
|------|------------------------------------|-----|--------------------------------------------------------------------------------|-----|-----------|---------|---------|-----------------------------------------------------------------------------------------------------------------------------------------------------------------------------------------------------------------------------------------------------------------------------------------------------------------------------------------------------------------------------------------------------------------------------------------------------------------------------------------------------------------------------------------------------------------------------------------------------------------------------------------------------------|
| 978  | 455123_length_961_cvg_6.8_tip_1_4  | 22  | zinc finger protein 76                                                         | 320 | 3.08E-89  | 67.60%  | 0.151   | IPR015880 (SMART); IPR013087 (G3DSA:3.30.160.GENE3D); IPR013087 (G3DSA:3.30.160.GENE3D); PF13465 (PFAM); PTHR11389 (PANTHER); PTHR11389:SF448 (PANTHER); IPR007087 (PROSITE_PATTERNS); IPR007087 (PROSITE_PATTERNS); IPR007087 (PROSITE_PATTERNS); IPR007087 (PROSITE_PROFILES); IPR007087 (PROSITE_PROFILES); IPR007087 (PROSITE_PROFILES); SSF57667 (SUPERFAMILY); SSF57667 (SUPERFAMILY)                                                                                                                                                                                                                                                               |
| 979  | 455197_length_961_cvg_10.9_tip_1_2 | 45  | prenylcysteine oxidase-like                                                    | 320 | 1.07E-61  | 57.20%  | 0.099   | IPR010795 (PFAM); IPR017046 (PANTHER)                                                                                                                                                                                                                                                                                                                                                                                                                                                                                                                                                                                                                     |
| 983  | 455595_length_965_cvg_4.0_tip_1_2  | 19  | retinol dehydrogenase 13                                                       | 321 | 2.41E-70  | 70.90%  | 0.114   | IPR002198 (PRINTS); IPR002347 (PRINTS); IPR016040 (G3DSA:3.40.50.GENE3D); IPR002198 (PFAM); PTHR24320:SF55 (PANTHER); PTHR24320 (PANTHER); IPR020904 (PROSITE_PATTERNS); SSF51735 (SUPERFAMILY)                                                                                                                                                                                                                                                                                                                                                                                                                                                           |
| 981  | 455539_length_965_cvg_4.0_tip_1_0  | 16  | hypothetical protein BRAFLDRAFT_203178                                         | 322 | 2.71E-26  | 69.30%  | 0.099   | IPR008979 (G3DSA:2.60.120.GENE3D); IPR006104 (PFAM); PTHR10066 (PANTHER); IPR028369 (PTHR10066:PANTHER); NON_CYTOPLASMIC_DOMAIN (PHOBIUS); TRANSMEMBRANE (PHOBIUS); CYTOPLASMIC_DOMAIN (PHOBIUS); CYTOPLASMIC_DOMAIN (PHOBIUS); TRANSMEMBRANE (PHOBIUS); TRANSMEMBRANE (PHOBIUS); NON_CYTOPLASMIC_DOMAIN (PHOBIUS); IPR008979 (SUPERFAMILY); TMhelix (TMHMM); TMhelix (TMHMM); TMhelix (TMHMM)                                                                                                                                                                                                                                                            |
| 982  | 455559_length_965_cvg_2.7_tip_1_4  | 16  | ser thr protein                                                                | 322 | 1.46E-153 | 85.50%  | 0.129   | IPR002290 (SMART); G3DSA:1.10.510.10 (GENE3D); G3DSA:3.30.200.20 (GENE3D); IPR000719 (PFAM); IPR020675 (PANTHER); IPR008271 (PROSITE_PATTERNS); IPR000719 (PROSITE_PROFILES); IPR011009 (SUPERFAMILY)                                                                                                                                                                                                                                                                                                                                                                                                                                                     |
| 984  | 455709_length_966_cvg_2.0_tip_1_1  | 10  | hypoxanthine partial                                                           | 322 | 1.95E-147 | 100.00% | 0.146   | IPR008274 (G3DSA:3.30.365.GENE3D); IPR008274 (PFAM); IPR008274 (G3DSA:3.30.365.GENE3D); PTHR11908 (PANTHER); PTHR11908:SF64 (PANTHER); IPR008274 (SUPERFAMILY)                                                                                                                                                                                                                                                                                                                                                                                                                                                                                            |
| 985  | 455769_length_967_cvg_3.2_tip_1_4  | 13  | secreted salivary gland                                                        | 322 | 9.03E-31  | 50.40%  | 0.107   | IPR023307 (G3DSA:2.170.15.GENE3D); IPR004991 (PFAM); NON_CYTOPLASMIC_DOMAIN (PHOBIUS); CYTOPLASMIC_DOMAIN (PHOBIUS); TRANSMEMBRANE (PHOBIUS); SSF56973 (SUPERFAMILY)                                                                                                                                                                                                                                                                                                                                                                                                                                                                                      |
| 1057 | 463991_length_1058_cvg_4.4_tip_1_0 | 23  | high affinity nerve growth factor                                              | 322 | 9.00E-32  | 73.70%  | 0.175   | IPR020635 (SMART); IPR001245 (PFAM); G3DSA:1.10.510.10 (GENE3D); PTHR24418 (PANTHER); PTHR24418:SF198 (PANTHER); IPR008266 (PROSITE_PATTERNS); TRANSMEMBRANE (PHOBIUS); CYTOPLASMIC_DOMAIN (PHOBIUS); NON_CYTOPLASMIC_DOMAIN (PHOBIUS); IPR011009 (SUPERFAMILY)                                                                                                                                                                                                                                                                                                                                                                                           |
| 986  | 455925_length_969_cvg_2.0_tip_1_3  | 9   | periplasmic endochitinase                                                      | 323 | 0         | 99.70%  | 0.141   | IPR003610 (SMART); IPR013781 (G3DSA:3.20.20.GENE3D); IPR003610 (PFAM); IPR003610 (G3DSA:2.10.10.GENE3D); IPR017853 (SUPERFAMILY); IPR003610 (SUPERFAMILY)                                                                                                                                                                                                                                                                                                                                                                                                                                                                                                 |
| 987  | 455925_length_969_cvg_2.0_tip_1_4  | 9   | chi11_metan ame: full=endochitinase 11 ame: full=chitinase 11 flags: precursor | 323 | 1.30E-06  | 77.00%  | 0.146   | NON_CYTOPLASMIC_DOMAIN (PHOBIUS); TRANSMEMBRANE (PHOBIUS); CYTOPLASMIC_DOMAIN (PHOBIUS)                                                                                                                                                                                                                                                                                                                                                                                                                                                                                                                                                                   |
| 988  | 456087_length_970_cvg_11.0_tip_1_2 | 55  | peroxisomal trans-2-enoyl- reductase-like                                      | 323 | 3.32E-128 | 74.70%  | 0.131   | IPR002347 (PRINTS); PF13561 (PFAM); IPR016040 (G3DSA:3.40.50.GENE3D); PTHR24317 (PANTHER); SSF51735 (SUPERFAMILY)                                                                                                                                                                                                                                                                                                                                                                                                                                                                                                                                         |
| 989  | 456095_length_970_cvg_2.5_tip_1_3  | 13  | neural ectodermal development factor imp-12                                    | 324 | 3.74E-44  | 51.40%  | 0.809 Y | IPR003599 (SMART); IPR003598 (SMART); IPR013098 (PFAM); PF13895 (PFAM); IPR013783 (G3DSA:2.60.40.GENE3D); IPR013783 (G3DSA:2.60.40.GENE3D); PTHR10489 (PANTHER); NON_CYTOPLASMIC_DOMAIN (PHOBIUS); SIGNAL_PEPTIDE (PHOBIUS); SIGNAL_PEPTIDE_C_REGION (PHOBIUS); SIGNAL_PEPTIDE_H_REGION (PHOBIUS); SIGNAL_PEPTIDE_N_REGION (PHOBIUS); IPR007110 (PROSITE_PROFILES); IPR007110 (PROSITE_PROFILES); SignalP-noTM (SIGNALP_EUK); SSF48726 (SUPERFAMILY); SSF48726 (SUPERFAMILY)                                                                                                                                                                              |
| 990  | 456115_length_970_cvg_4.0_tip_1_3  | 14  | zinc finger protein 347 isoform x1                                             | 324 | 1.26E-57  | 69.00%  | 0.101   | IPR015880 (SMART); IPR013087 (G3DSA:3.30.160.GENE3D); IPR013087 (G3DSA:3.30.160.GENE3D); IPR013087 (G3DSA:3.30.160.GENE3D); PF13465 (PFAM); PTHR24409 (PANTHER); PTHR24409:SF13 (PANTHER); IPR007087 (PROSITE_PATTERNS); IPR007087 (PROSITE_PATTERNS); IPR007087 (PROSITE_PATTERNS); IPR007087 (PROSITE_PATTERNS); IPR007087 (PROSITE_PATTERNS); TRANSMEMBRANE (PHOBIUS); CYTOPLASMIC_DOMAIN (PHOBIUS); NON_CYTOPLASMIC_DOMAIN (PHOBIUS); IPR007087 (PROSITE_PROFILES); IPR007087 (PROSITE_PROFILES); IPR007087 (PROSITE_PROFILES); IPR007087 (PROSITE_PROFILES); SSF57667 (SUPERFAMILY); SSF57667 (SUPERFAMILY); SSF57667 (SUPERFAMILY); TMhelix (TMHMM) |
| 991  | 456291_length_972_cvg_11.8_tip_1_5 | 53  | bone morphogenetic protein 4                                                   | 324 | 5.39E-14  | 46.40%  | 0.112   | Coil (COILS); IPR001111 (PFAM); IPR015615 (PANTHER)                                                                                                                                                                                                                                                                                                                                                                                                                                                                                                                                                                                                       |
| 992  | 456497_length_974_cvg_47.1_tip_1_2 | 225 | zinc finger protein zpr1                                                       | 324 | 1.14E-127 | 73.80%  | 0.185   | IPR004457 (SMART); IPR004457 (PFAM); IPR004457 (TIGRFAM); PTHR10876:SF0 (PANTHER); PTHR10876 (PANTHER)                                                                                                                                                                                                                                                                                                                                                                                                                                                                                                                                                    |



|      |                                    |       |                                                       |     |           |        |         |                                                                                                                                                                                                                                                                                                                                                                                                                                                                                                                                                           |
|------|------------------------------------|-------|-------------------------------------------------------|-----|-----------|--------|---------|-----------------------------------------------------------------------------------------------------------------------------------------------------------------------------------------------------------------------------------------------------------------------------------------------------------------------------------------------------------------------------------------------------------------------------------------------------------------------------------------------------------------------------------------------------------|
| 993  | 456537_length_974_cvg_4.5_tip_1_5  | 24    | gastrula zinc finger protein                          | 324 | 1.25E-22  | 56.80% | 0.104   | IPR015880 (SMART); IPR013087 (G3DSA:3.30.160.GENE3D); PF13894 (PFAM); PF13465 (PFAM); IPR013087 (G3DSA:3.30.160.GENE3D); IPR013087 (G3DSA:3.30.160.GENE3D); IPR007087 (PFAM); PTHR24409 (PANTHER); PTHR24409:SF14 (PANTHER); IPR007087 (PROSITE_PATTERNS); IPR007087 (PROSITE_PATTERNS); IPR007087 (PROSITE_PATTERNS); IPR007087 (PROSITE_PROFILES); IPR007087 (PROSITE_PROFILES); IPR007087 (PROSITE_PROFILES); IPR007087 (PROSITE_PROFILES); IPR007087 (PROSITE_PROFILES); IPR007087 (PROSITE_PROFILES); SSF57667 (SUPERFAMILY); SSF57667 (SUPERFAMILY) |
| 1022 | 458903_length_999_cvg_36.3_tip_1_5 | 147   | subtilisin-like serine protease                       | 324 | 8.29E-13  | 56.00% | 0.510 Y | TRANSMEMBRANE (PHOBIUS); CYTOPLASMIC_DOMAIN (PHOBIUS); NON_CYTOPLASMIC_DOMAIN (PHOBIUS); TRANSMEMBRANE (PHOBIUS); NON_CYTOPLASMIC_DOMAIN (PHOBIUS); SignalP-TM (SIGNALP_EUK)                                                                                                                                                                                                                                                                                                                                                                              |
| 994  | 456555_length_975_cvg_70.9_tip_1_4 | 15826 | anti-lipopolysaccharide factor                        | 325 | 3.10E-33  | 68.60% | 0.411 Y | IPR024509 (PFAM); CYTOPLASMIC_DOMAIN (PHOBIUS); CYTOPLASMIC_DOMAIN (PHOBIUS); TRANSMEMBRANE (PHOBIUS); NON_CYTOPLASMIC_DOMAIN (PHOBIUS); TRANSMEMBRANE (PHOBIUS); NON_CYTOPLASMIC_DOMAIN (PHOBIUS); TRANSMEMBRANE (PHOBIUS); IPR024716 (PRODOM); TMhelix (TMHMM); TMhelix (TMHMM)                                                                                                                                                                                                                                                                         |
| 995  | 456779_length_977_cvg_3.0_tip_1_3  | 13    | zinc finger protein                                   | 326 | 7.98E-15  | 56.10% | 0.113   | IPR015880 (SMART); PF13465 (PFAM); IPR013087 (G3DSA:3.30.160.GENE3D); PF13894 (PFAM); PTHR24375:SF106 (PANTHER); PTHR24375 (PANTHER); IPR007087 (PROSITE_PATTERNS); IPR007087 (PROSITE_PATTERNS); IPR007087 (PROSITE_PATTERNS); IPR007087 (PROSITE_PROFILES); IPR007087 (PROSITE_PROFILES); SSF57667 (SUPERFAMILY); SSF57667 (SUPERFAMILY)                                                                                                                                                                                                                |
| 996  | 456819_length_977_cvg_61.8_tip_1_0 | 376   | adp-ribosylation factor-like protein 1                | 326 | 8.92E-118 | 95.90% | 0.134   | IPR006689 (PRINTS); IPR006687 (SMART); IPR024156 (SMART); IPR003579 (SMART); IPR027417 (G3DSA:3.40.50.GENE3D); IPR005225 (TIGRFAM); IPR006689 (PFAM); PTHR11711:SF41 (PANTHER); PTHR11711 (PANTHER); IPR024156 (PROSITE_PROFILES); IPR027417 (SUPERFAMILY)                                                                                                                                                                                                                                                                                                |
| 997  | 456875_length_978_cvg_3.1_tip_1_4  | 18    | zinc finger                                           | 326 | 1.22E-70  | 69.50% | 0.1     | IPR015880 (SMART); IPR013087 (G3DSA:3.30.160.GENE3D); IPR013087 (G3DSA:3.30.160.GENE3D); IPR013087 (G3DSA:3.30.160.GENE3D); PF13894 (PFAM); PF13465 (PFAM); PTHR24391 (PANTHER); PTHR24391:SF9 (PANTHER); IPR007087 (PROSITE_PATTERNS); IPR007087 (PROSITE_PATTERNS); IPR007087 (PROSITE_PATTERNS); IPR007087 (PROSITE_PATTERNS); IPR007087 (PROSITE_PROFILES); IPR007087 (PROSITE_PROFILES); IPR007087 (PROSITE_PROFILES); IPR007087 (PROSITE_PROFILES); SSF57667 (SUPERFAMILY); SSF57667 (SUPERFAMILY)                                                  |
| 998  | 456899_length_978_cvg_22.4_tip_1_4 | 89    | apolipoprotein d-like                                 | 326 | 2.80E-42  | 60.20% | 0.246   | IPR003057 (PRINTS); IPR000566 (PFAM); IPR012674 (G3DSA:2.40.128.GENE3D); PTHR10612:SF7 (PANTHER); PTHR10612 (PANTHER); CYTOPLASMIC_DOMAIN (PHOBIUS); TRANSMEMBRANE (PHOBIUS); NON_CYTOPLASMIC_DOMAIN (PHOBIUS); IPR011038 (SUPERFAMILY); TMhelix (TMHMM)                                                                                                                                                                                                                                                                                                  |
| 999  | 457017_length_979_cvg_3.6_tip_1_1  | 15    | dnaj homolog subfamily c member 21-like               | 326 | 1.55E-140 | 81.50% | 0.122   | Coil (COILS); Coil (COILS); IPR001623 (PRINTS); IPR001623 (SMART); IPR001623 (G3DSA:1.10.287.GENE3D); IPR001623 (PFAM); PTHR24078 (PANTHER); PTHR24078:SF150 (PANTHER); IPR018253 (PROSITE_PATTERNS); IPR001623 (PROSITE_PROFILES); IPR001623 (SUPERFAMILY)                                                                                                                                                                                                                                                                                               |
| 1000 | 457113_length_980_cvg_76.7_tip_1_5 | 62696 | chymotrypsinogen 2-like                               | 326 | 2.46E-46  | 56.50% | 0.31    | IPR001314 (PRINTS); IPR001254 (SMART); G3DSA:2.40.10.10 (GENE3D); G3DSA:2.40.10.10 (GENE3D); G3DSA:2.40.10.10 (GENE3D); IPR001254 (PFAM); PTHR24256 (PANTHER); IPR018114 (PROSITE_PATTERNS); IPR018114 (PROSITE_PATTERNS); NON_CYTOPLASMIC_DOMAIN (PHOBIUS); CYTOPLASMIC_DOMAIN (PHOBIUS); TRANSMEMBRANE (PHOBIUS); IPR001254 (PROSITE_PROFILES); IPR009003 (SUPERFAMILY); TMhelix (TMHMM)                                                                                                                                                                |
| 1001 | 457123_length_980_cvg_5.8_tip_1_3  | 26    | trypsin theta                                         | 327 | 4.33E-19  | 52.80% | 0.107   | IPR001254 (SMART); G3DSA:2.40.10.10 (GENE3D); IPR001254 (PFAM); G3DSA:2.40.10.10 (GENE3D); PTHR24276 (PANTHER); CYTOPLASMIC_DOMAIN (PHOBIUS); NON_CYTOPLASMIC_DOMAIN (PHOBIUS); TRANSMEMBRANE (PHOBIUS); IPR001254 (PROSITE_PROFILES); IPR009003 (SUPERFAMILY); TMhelix (TMHMM); TMhelix (TMHMM)                                                                                                                                                                                                                                                          |
| 1002 | 457203_length_981_cvg_5.4_tip_1_2  | 26    | immunoglobulin superfamily dcc subclass member 3-like | 327 | 7.51E-40  | 65.00% | 0.105   | IPR003598 (SMART); IPR003599 (SMART); IPR013783 (G3DSA:2.60.40.GENE3D); IPR013783 (G3DSA:2.60.40.GENE3D); PF13895 (PFAM); IPR013098 (PFAM); IPR013783 (G3DSA:2.60.40.GENE3D); PTHR10489 (PANTHER); TRANSMEMBRANE (PHOBIUS); CYTOPLASMIC_DOMAIN (PHOBIUS); NON_CYTOPLASMIC_DOMAIN (PHOBIUS); CYTOPLASMIC_DOMAIN (PHOBIUS); TRANSMEMBRANE (PHOBIUS); IPR007110 (PROSITE_PROFILES); SSF48726 (SUPERFAMILY); SSF48726 (SUPERFAMILY); TMhelix (TMHMM); TMhelix (TMHMM)                                                                                         |



|      |                                     |        |                                                                             |     |           |         |         |                                                                                                                                                                                                                                                                                                                                                                                                              |
|------|-------------------------------------|--------|-----------------------------------------------------------------------------|-----|-----------|---------|---------|--------------------------------------------------------------------------------------------------------------------------------------------------------------------------------------------------------------------------------------------------------------------------------------------------------------------------------------------------------------------------------------------------------------|
| 1023 | 459023_length_1001_cvg_29.5_tip_1_3 | 126    | aminoacyl trna synthase complex-interacting multifunctional protein partial | 330 | 3.46E-100 | 68.30%  | 0.101   | Coil (COILS); IPR002547 (PFAM); IPR012340 (G3DSA:2.40.50.GENE3D); PTHR11586 (PANTHER); PTHR11586:SF1 (PANTHER); IPR002547 (PROSITE_PROFILES); IPR012340 (SUPERFAMILY)                                                                                                                                                                                                                                        |
| 1015 | 458115_length_991_cvg_4.7_tip_1_3   | 23     | rac protein kinase drac-                                                    | 331 | 3.92E-162 | 86.90%  | 0.121   | IPR000961 (SMART); IPR002290 (SMART); G3DSA:1.10.510.10 (GENE3D); IPR000719 (PFAM); IPR017892 (PFAM); PTHR24351 (PANTHER); PTHR24351:SF64 (PANTHER); IPR008271 (PROSITE_PATTERNS); IPR000961 (PROSITE_PROFILES); IPR000719 (PROSITE_PROFILES); IPR011009 (SUPERFAMILY)                                                                                                                                       |
| 1016 | 458135_length_991_cvg_72.9_tip_1_3  | 247454 | prostasin- partial                                                          | 331 | 7.65E-47  | 55.70%  | 0.132   | IPR001314 (PRINTS); IPR001254 (SMART); G3DSA:2.40.10.10 (GENE3D); G3DSA:2.40.10.10 (GENE3D); G3DSA:2.40.10.10 (GENE3D); IPR001254 (PFAM); PTHR24268 (PANTHER); IPR018114 (PROSITE_PATTERNS); IPR018114 (PROSITE_PATTERNS); IPR001254 (PROSITE_PROFILES); IPR009003 (SUPERFAMILY)                                                                                                                             |
| 1017 | 458187_length_992_cvg_63.0_tip_0_0  | 596    | 14-3-3 partial                                                              | 331 | 2.98E-28  | 100.00% | 0.113   | IPR023410 (PFAM); G3DSA:1.20.190.20 (GENE3D); IPR000308 (PANTHER); IPR023409 (PROSITE_PATTERNS); IPR023410 (SUPERFAMILY)                                                                                                                                                                                                                                                                                     |
| 1018 | 458195_length_992_cvg_68.2_tip_1_1  | 2323   | probable chitinase 3                                                        | 331 | 1.66E-72  | 53.40%  | 0.098   | IPR011583 (SMART); IPR002557 (SMART); IPR001223 (PFAM); IPR002557 (G3DSA:2.170.140.GENE3D); IPR029070 (G3DSA:3.10.50.GENE3D); IPR002557 (PFAM); IPR013781 (G3DSA:3.20.20.GENE3D); PTHR11177:SF112 (PANTHER); PTHR11177 (PANTHER); IPR002557 (PROSITE_PROFILES); IPR029070 (SUPERFAMILY); IPR017853 (SUPERFAMILY); IPR002557 (SUPERFAMILY)                                                                    |
| 1019 | 458399_length_994_cvg_16.1_tip_1_2  | 74     | lysosomal acid phosphatase                                                  | 331 | 2.34E-86  | 67.10%  | 0.099   | IPR029033 (G3DSA:3.40.50.GENE3D); IPR000560 (PFAM); PTHR11567:SF26 (PANTHER); PTHR11567 (PANTHER); IPR000560 (PROSITE_PATTERNS); NON_CYTOPLASMIC_DOMAIN (PHOBIUS); TRANSMEMBRANE (PHOBIUS); CYTOPLASMIC_DOMAIN (PHOBIUS); CYTOPLASMIC_DOMAIN (PHOBIUS); TRANSMEMBRANE (PHOBIUS); IPR029033 (SUPERFAMILY)                                                                                                     |
| 1020 | 458575_length_995_cvg_9.3_tip_1_5   | 46     | tolloid-like protein 2 isoform x1                                           | 331 | 3.03E-160 | 74.70%  | 0.106   | IPR000859 (SMART); IPR000859 (G3DSA:2.60.120.GENE3D); IPR000859 (PFAM); IPR002172 (G3DSA:4.10.400.GENE3D); IPR000859 (G3DSA:2.60.120.GENE3D); PTHR10127 (PANTHER); PTHR10127:SF557 (PANTHER); IPR000859 (PROSITE_PROFILES); IPR000859 (PROSITE_PROFILES); IPR000859 (SUPERFAMILY); IPR000859 (SUPERFAMILY)                                                                                                   |
| 1021 | 458817_length_998_cvg_3.2_tip_1_2   | 15     | histone h2a                                                                 | 332 | 4.40E-78  | 99.80%  | 0.131   | IPR002119 (PRINTS); IPR002119 (SMART); IPR007125 (PFAM); IPR009072 (G3DSA:1.10.20.GENE3D); PTHR23430:SF45 (PANTHER); PTHR23430 (PANTHER); IPR002119 (PROSITE_PATTERNS); IPR009072 (SUPERFAMILY)                                                                                                                                                                                                              |
| 1034 | 460605_length_1018_cvg_9.7_tip_1_0  | 46     | a disintegrin and metalloproteinase with thrombospondin motifs 2            | 333 | 5.91E-15  | 48.80%  | 0.104   | IPR002870 (PFAM); PTHR13723 (PANTHER)                                                                                                                                                                                                                                                                                                                                                                        |
| 1024 | 459545_length_1006_cvg_2.5_tip_1_4  | 14     | af425264_1lysozyme precursor                                                | 335 | 5.60E-42  | 71.80%  | 0.421 Y | IPR001916 (PRINTS); IPR001916 (SMART); G3DSA:1.10.530.10 (GENE3D); IPR001916 (PFAM); PTHR11407:SF4 (PANTHER); PTHR11407 (PANTHER); IPR019799 (PROSITE_PATTERNS); TRANSMEMBRANE (PHOBIUS); CYTOPLASMIC_DOMAIN (PHOBIUS); NON_CYTOPLASMIC_DOMAIN (PHOBIUS); TRANSMEMBRANE (PHOBIUS); NON_CYTOPLASMIC_DOMAIN (PHOBIUS); IPR001916 (PROSITE_PROFILES); IPR023346 (SUPERFAMILY); TMhelix (TMHMM); TMhelix (TMHMM) |
| 1040 | 461805_length_1032_cvg_58.9_tip_1_2 | 317    | alpha-aminoadipic semialdehyde dehydrogenase                                | 335 | 7.06E-164 | 84.80%  | 0.117   | IPR015590 (PFAM); IPR016163 (G3DSA:3.40.309.GENE3D); IPR016162 (G3DSA:3.40.605.GENE3D); PTHR11699:SF144 (PANTHER); PTHR11699 (PANTHER); IPR029510 (PROSITE_PATTERNS); IPR016161 (SUPERFAMILY)                                                                                                                                                                                                                |
| 1025 | 459615_length_1007_cvg_64.9_tip_1_0 | 761    | torsin-1b-like isoform x1                                                   | 336 | 2.01E-77  | 66.90%  | 0.253   | IPR001270 (PRINTS); IPR010448 (PFAM); IPR027417 (G3DSA:3.40.50.GENE3D); IPR010448 (PANTHER); NON_CYTOPLASMIC_DOMAIN (PHOBIUS); CYTOPLASMIC_DOMAIN (PHOBIUS); NON_CYTOPLASMIC_DOMAIN (PHOBIUS); TRANSMEMBRANE (PHOBIUS); TRANSMEMBRANE (PHOBIUS); IPR027417 (SUPERFAMILY); TMhelix (TMHMM)                                                                                                                    |
| 1026 | 459749_length_1008_cvg_3.5_tip_1_5  | 15     | sortilin-related receptor-like                                              | 336 | 3.90E-52  | 55.30%  | 0.465 Y | IPR013783 (G3DSA:2.60.40.GENE3D); CYTOPLASMIC_DOMAIN (PHOBIUS); NON_CYTOPLASMIC_DOMAIN (PHOBIUS); TRANSMEMBRANE (PHOBIUS); SignalP-noTM (SIGNALP_EUK); IPR003961 (SUPERFAMILY); TMhelix (TMHMM)                                                                                                                                                                                                              |
| 1027 | 459809_length_1009_cvg_37.2_tip_1_2 | 2816   | alkaline serine protease                                                    | 336 | 3.87E-20  | 66.80%  | 0.236   | Coil (COILS); IPR007280 (PFAM); CYTOPLASMIC_DOMAIN (PHOBIUS); CYTOPLASMIC_DOMAIN (PHOBIUS); TRANSMEMBRANE (PHOBIUS); TRANSMEMBRANE (PHOBIUS); NON_CYTOPLASMIC_DOMAIN (PHOBIUS); TRANSMEMBRANE (PHOBIUS); NON_CYTOPLASMIC_DOMAIN (PHOBIUS); TRANSMEMBRANE (PHOBIUS); NON_CYTOPLASMIC_DOMAIN (PHOBIUS); TMhelix (TMHMM); TMhelix (TMHMM); TMhelix (TMHMM)                                                      |
| 1029 | 460111_length_1012_cvg_3.7_tip_1_4  | 18     | hyaluronidase- partial                                                      | 337 | 5.63E-57  | 61.50%  | 0.121   | IPR018155 (PRINTS); IPR018155 (PFAM); IPR013785 (G3DSA:3.20.20.GENE3D); IPR018155 (PANTHER); PTHR11769:SF8 (PANTHER); IPR017853 (SUPERFAMILY)                                                                                                                                                                                                                                                                |

|      |                                     |      |                                                                                                                                                                            |     |           |        |       |                                                                                                                                                                                                                                                                                                                                                                                                                                                                                                                                                                                                                                                                              |
|------|-------------------------------------|------|----------------------------------------------------------------------------------------------------------------------------------------------------------------------------|-----|-----------|--------|-------|------------------------------------------------------------------------------------------------------------------------------------------------------------------------------------------------------------------------------------------------------------------------------------------------------------------------------------------------------------------------------------------------------------------------------------------------------------------------------------------------------------------------------------------------------------------------------------------------------------------------------------------------------------------------------|
| 1030 | 460119_length_1012_cvg_8.3_tip_1_1  | 38   | prolow-density lipoprotein receptor-related protein 1-like                                                                                                                 | 337 | 3.41E-31  | 54.70% | 0.103 | IPR002172 (PRINTS); IPR002172 (SMART); IPR002172 (G3DSA:4.10.400.GENE3D); IPR002172 (G3DSA:4.10.400.GENE3D); IPR002172 (PFAM); IPR002172 (G3DSA:4.10.400.GENE3D); PTHR10529 (PANTHER); IPR023415 (PROSITE_PATTERNS); CYTOPLASMIC_DOMAIN (PHOBIUS); TRANSMEMBRANE (PHOBIUS); TRANSMEMBRANE (PHOBIUS); NON_CYTOPLASMIC_DOMAIN (PHOBIUS); CYTOPLASMIC_DOMAIN (PHOBIUS); IPR002172 (PROSITE_PROFILES); IPR002172 (PROSITE_PROFILES); IPR002172 (PROSITE_PROFILES); IPR002172 (SUPERFAMILY); IPR002172 (SUPERFAMILY); IPR002172 (SUPERFAMILY); TMhelix (TMHMM); TMhelix (TMHMM)                                                                                                   |
| 1031 | 460391_length_1015_cvg_10.4_tip_1_4 | 48   | zinc finger protein 271 (zinc finger protein 7) (zinc finger protein znfphe133) (epstein-barr virus-induced zinc finger protein) (znf-eb) (ct-zfp48) (zinc finger protein) | 338 | 2.59E-31  | 51.90% | 0.1   | IPR015880 (SMART); IPR013087 (G3DSA:3.30.160.GENE3D); IPR007087 (PFAM); PF13894 (PFAM); IPR013087 (G3DSA:3.30.160.GENE3D); IPR013087 (G3DSA:3.30.160.GENE3D); PTHR24375:SF106 (PANTHER); PTHR24375 (PANTHER); IPR007087 (PROSITE_PATTERNS); IPR007087 (PROSITE_PATTERNS); IPR007087 (PROSITE_PATTERNS); IPR007087 (PROSITE_PATTERNS); IPR007087 (PROSITE_PATTERNS); NON_CYTOPLASMIC_DOMAIN (PHOBIUS); TRANSMEMBRANE (PHOBIUS); CYTOPLASMIC_DOMAIN (PHOBIUS); IPR007087 (PROSITE_PROFILES); IPR007087 (PROSITE_PROFILES); IPR007087 (PROSITE_PROFILES); IPR007087 (PROSITE_PROFILES); SSF57667 (SUPERFAMILY); SSF57667 (SUPERFAMILY); SSF57667 (SUPERFAMILY); TMhelix (TMHMM) |
| 1032 | 460507_length_1017_cvg_37.0_tip_1_2 | 62   | ensangp00000031746-like partial                                                                                                                                            | 339 | 8.20E-78  | 92.80% | 0.232 | IPR002130 (PRINTS); IPR002130 (PFAM); IPR029000 (G3DSA:2.40.100.GENE3D); IPR024936 (PANTHER); IPR020892 (PROSITE_PATTERNS); IPR002130 (PROSITE_PROFILES); IPR029000 (SUPERFAMILY)                                                                                                                                                                                                                                                                                                                                                                                                                                                                                            |
| 1033 | 460545_length_1017_cvg_65.4_tip_1_1 | 1025 | ---NA---                                                                                                                                                                   | 339 |           |        | 0.187 | no IPS match                                                                                                                                                                                                                                                                                                                                                                                                                                                                                                                                                                                                                                                                 |
| 1062 | 464363_length_1063_cvg_54.0_tip_1_1 | 333  | isoamyl acetate-hydrolyzing esterase 1 homolog                                                                                                                             | 339 | 2.20E-73  | 65.70% | 0.118 | IPR013830 (G3DSA:3.40.50.GENE3D); IPR001087 (PFAM); PTHR14209 (PANTHER); IPR013830 (SUPERFAMILY)                                                                                                                                                                                                                                                                                                                                                                                                                                                                                                                                                                             |
| 1047 | 462625_length_1041_cvg_55.3_tip_1_3 | 339  | beta-mannosidase                                                                                                                                                           | 340 | 8.69E-70  | 60.20% | 0.114 | IPR013781 (G3DSA:3.20.20.GENE3D); IPR028369 (PTHR10066:PANTHER); PTHR10066 (PANTHER); NON_CYTOPLASMIC_DOMAIN (PHOBIUS); TRANSMEMBRANE (PHOBIUS); CYTOPLASMIC_DOMAIN (PHOBIUS); IPR006102 (SUPERFAMILY); IPR017853 (SUPERFAMILY); IPR006102 (SUPERFAMILY)                                                                                                                                                                                                                                                                                                                                                                                                                     |
| 1035 | 461089_length_1023_cvg_2.4_tip_1_4  | 15   | dnaj homolog dnj-5                                                                                                                                                         | 341 | 4.36E-132 | 71.60% | 0.208 | IPR001623 (PRINTS); IPR001623 (SMART); PF14901 (PFAM); IPR001623 (G3DSA:1.10.287.GENE3D); IPR001623 (PFAM); PTHR24078:SF141 (PANTHER); PTHR24078 (PANTHER); IPR001623 (PROSITE_PROFILES); IPR001623 (SUPERFAMILY)                                                                                                                                                                                                                                                                                                                                                                                                                                                            |
| 1036 | 461141_length_1024_cvg_3.7_tip_1_5  | 21   | aael001398- partial                                                                                                                                                        | 341 | 2.90E-111 | 76.30% | 0.156 | Coil (COILS); IPR001849 (SMART); IPR001452 (SMART); IPR011993 (G3DSA:2.30.29.GENE3D); IPR001452 (PFAM); G3DSA:2.30.30.40 (GENE3D); PTHR12845 (PANTHER); PTHR12845:SF5 (PANTHER); IPR001849 (PROSITE_PROFILES); IPR001452 (PROSITE_PROFILES); SSF50729 (SUPERFAMILY); IPR001452 (SUPERFAMILY)                                                                                                                                                                                                                                                                                                                                                                                 |
| 1037 | 461185_length_1025_cvg_21.3_tip_1_5 | 66   | otogelin-like protein                                                                                                                                                      | 341 | 6.30E-09  | 47.10% | 0.099 | no IPS match                                                                                                                                                                                                                                                                                                                                                                                                                                                                                                                                                                                                                                                                 |
| 1050 | 462795_length_1043_cvg_7.3_tip_1_4  | 42   | dynein heavy chain axonemal                                                                                                                                                | 341 | 4.47E-11  | 60.80% | 0.27  | no IPS match                                                                                                                                                                                                                                                                                                                                                                                                                                                                                                                                                                                                                                                                 |
| 1039 | 461571_length_1029_cvg_7.6_tip_1_2  | 46   | peptidyl-prolyl cis-trans isomerase h                                                                                                                                      | 343 | 5.42E-125 | 95.40% | 0.111 | IPR002130 (PRINTS); IPR002130 (PFAM); IPR029000 (G3DSA:2.40.100.GENE3D); PTHR11071:SF58 (PANTHER); IPR024936 (PANTHER); IPR020892 (PROSITE_PATTERNS); TRANSMEMBRANE (PHOBIUS); NON_CYTOPLASMIC_DOMAIN (PHOBIUS); TRANSMEMBRANE (PHOBIUS); NON_CYTOPLASMIC_DOMAIN (PHOBIUS); CYTOPLASMIC_DOMAIN (PHOBIUS); TRANSMEMBRANE (PHOBIUS); CYTOPLASMIC_DOMAIN (PHOBIUS); TRANSMEMBRANE (PHOBIUS); NON_CYTOPLASMIC_DOMAIN (PHOBIUS); IPR002130 (PROSITE_PROFILES); IPR029000 (SUPERFAMILY); TMhelix (TMHMM); TMhelix (TMHMM); TMhelix (TMHMM)                                                                                                                                         |
| 1041 | 462245_length_1037_cvg_5.6_tip_1_0  | 22   | adamts-like protein 4 isoform x1                                                                                                                                           | 346 | 1.24E-22  | 56.70% | 0.205 | IPR000884 (SMART); IPR000884 (PFAM); G3DSA:2.20.100.10 (GENE3D); PTHR13723 (PANTHER); NON_CYTOPLASMIC_DOMAIN (PHOBIUS); NON_CYTOPLASMIC_DOMAIN (PHOBIUS); CYTOPLASMIC_DOMAIN (PHOBIUS); TRANSMEMBRANE (PHOBIUS); TRANSMEMBRANE (PHOBIUS); IPR000884 (PROSITE_PROFILES); IPR000884 (SUPERFAMILY); TMhelix (TMHMM); TMhelix (TMHMM); TMhelix (TMHMM)                                                                                                                                                                                                                                                                                                                           |
| 1042 | 462307_length_1038_cvg_50.6_tip_1_1 | 694  | peptidyl-prolyl cis-trans isomerase-like 3                                                                                                                                 | 346 | 2.52E-96  | 91.00% | 0.146 | IPR002130 (PRINTS); IPR029000 (G3DSA:2.40.100.GENE3D); IPR002130 (PFAM); IPR024936 (PANTHER); IPR020892 (PROSITE_PATTERNS); IPR002130 (PROSITE_PROFILES); IPR029000 (SUPERFAMILY)                                                                                                                                                                                                                                                                                                                                                                                                                                                                                            |





|      |                                     |     |                                                         |     |          |        |         |                                                                                                                                                                                                                                                                                                                                                                                                                                                                                                                                                                                                                                    |
|------|-------------------------------------|-----|---------------------------------------------------------|-----|----------|--------|---------|------------------------------------------------------------------------------------------------------------------------------------------------------------------------------------------------------------------------------------------------------------------------------------------------------------------------------------------------------------------------------------------------------------------------------------------------------------------------------------------------------------------------------------------------------------------------------------------------------------------------------------|
| 1056 | 463949_length_1058_cvg_15.4_tip_1_3 | 53  | fibroblast growth factor receptor partial               | 353 | 8.31E-16 | 67.40% | 0.101   | IPR013783 (G3DSA:2.60.40.GENE3D); IPR028174 (PTHR24416:PANTHER); PTHR24416 (PANTHER); SSF48726 (SUPERFAMILY)                                                                                                                                                                                                                                                                                                                                                                                                                                                                                                                       |
| 1058 | 464049_length_1059_cvg_5.4_tip_1_5  | 24  | tyrosine-protein phosphatase lar isoform x1             | 353 | 8.30E-28 | 74.50% | 0.118   | IPR003961 (SMART); IPR013783 (G3DSA:2.60.40.GENE3D); IPR003961 (PFAM); PTHR19134 (PANTHER); PTHR19134:SF199 (PANTHER); CYTOPLASMIC_DOMAIN (PHOBIUS); TRANSMEMBRANE (PHOBIUS); NON_CYTOPLASMIC_DOMAIN (PHOBIUS); TRANSMEMBRANE (PHOBIUS); TRANSMEMBRANE (PHOBIUS); NON_CYTOPLASMIC_DOMAIN (PHOBIUS); CYTOPLASMIC_DOMAIN (PHOBIUS); IPR003961 (PROSITE_PROFILES); IPR003961 (SUPERFAMILY); TMhelix (TMHMM); TMhelix (TMHMM)                                                                                                                                                                                                          |
| 1059 | 464191_length_1061_cvg_6.4_tip_1_3  | 34  | aromatic hydrocarbon receptor                           | 354 | 3.40E-13 | 62.50% | 0.172   | NON_CYTOPLASMIC_DOMAIN (PHOBIUS); CYTOPLASMIC_DOMAIN (PHOBIUS); TRANSMEMBRANE (PHOBIUS); TMhelix (TMHMM)                                                                                                                                                                                                                                                                                                                                                                                                                                                                                                                           |
| 1060 | 464303_length_1062_cvg_2.5_tip_1_3  | 13  | zinc finger protein 235-like isoform x1                 | 354 | 1.12E-31 | 61.20% | 0.285   | IPR015880 (SMART); IPR013087 (G3DSA:3.30.160.GENE3D); PF13465 (PFAM); IPR013087 (G3DSA:3.30.160.GENE3D); PTHR24409 (PANTHER); PTHR24409:SF13 (PANTHER); IPR007087 (PROSITE_PATTERNS); IPR007087 (PROSITE_PATTERNS); IPR007087 (PROSITE_PROFILES); IPR007087 (PROSITE_PROFILES); SSF57667 (SUPERFAMILY); SSF57667 (SUPERFAMILY); SSF57667 (SUPERFAMILY)                                                                                                                                                                                                                                                                             |
| 1061 | 464335_length_1062_cvg_2.1_tip_1_5  | 17  | xanthine dehydrogenase oxidase                          | 354 | 1.95E-23 | 80.40% | 0.623 Y | IPR008274 (PFAM); IPR008274 (G3DSA:3.30.365.GENE3D); PTHR11908:SF32 (PANTHER); PTHR11908 (PANTHER); SignalP-noTM (SIGNALP_EUK); IPR008274 (SUPERFAMILY)                                                                                                                                                                                                                                                                                                                                                                                                                                                                            |
| 1080 | 466451_length_1089_cvg_68.9_tip_1_0 | 537 | glycosyl-phosphatidylinositol-linked carbonic anhydrase | 354 | 3.78E-85 | 63.40% | 0.167   | IPR001148 (SMART); IPR001148 (PFAM); IPR001148 (G3DSA:3.10.200.GENE3D); IPR023561 (PANTHER); IPR018338 (PROSITE_PATTERNS); IPR001148 (PROSITE_PROFILES); IPR001148 (SUPERFAMILY)                                                                                                                                                                                                                                                                                                                                                                                                                                                   |
| 1063 | 464691_length_1067_cvg_19.6_tip_1_5 | 85  | insulin-like growth factor-binding protein 7 precursor  | 355 | 6.42E-37 | 64.90% | 0.162   | IPR003599 (SMART); IPR003598 (SMART); IPR013098 (PFAM); IPR013783 (G3DSA:2.60.40.GENE3D); IPR011390 (PANTHER); PTHR14186:SF9 (PANTHER); TRANSMEMBRANE (PHOBIUS); NON_CYTOPLASMIC_DOMAIN (PHOBIUS); NON_CYTOPLASMIC_DOMAIN (PHOBIUS); TRANSMEMBRANE (PHOBIUS); CYTOPLASMIC_DOMAIN (PHOBIUS); NON_CYTOPLASMIC_DOMAIN (PHOBIUS); CYTOPLASMIC_DOMAIN (PHOBIUS); TRANSMEMBRANE (PHOBIUS); TRANSMEMBRANE (PHOBIUS); IPR007110 (PROSITE_PROFILES); SSF48726 (SUPERFAMILY); TMhelix (TMHMM); TMhelix (TMHMM)                                                                                                                               |
| 1064 | 464757_length_1068_cvg_7.4_tip_1_2  | 39  | 5-hydroxyisourate hydrolase                             | 356 | 1.90E-33 | 68.20% | 0.1     | IPR000895 (PRINTS); IPR023416 (SMART); IPR023416 (G3DSA:2.60.40.GENE3D); IPR023416 (PFAM); IPR014306 (TIGRFAM); PTHR10395:SF8 (PANTHER); PTHR10395 (PANTHER); IPR023418 (PROSITE_PATTERNS); IPR023416 (SUPERFAMILY)                                                                                                                                                                                                                                                                                                                                                                                                                |
| 1065 | 464981_length_1070_cvg_7.4_tip_1_5  | 40  | zinc finger protein 699-like                            | 356 | 8.56E-34 | 55.70% | 0.106   | IPR015880 (SMART); PF13465 (PFAM); IPR013087 (G3DSA:3.30.160.GENE3D); IPR013087 (G3DSA:3.30.160.GENE3D); PF13894 (PFAM); IPR007087 (PFAM); PTHR24409 (PANTHER); PTHR24409:SF14 (PANTHER); IPR007087 (PROSITE_PATTERNS); IPR007087 (PROSITE_PATTERNS); IPR007087 (PROSITE_PATTERNS); IPR007087 (PROSITE_PATTERNS); IPR007087 (PROSITE_PATTERNS); IPR007087 (PROSITE_PATTERNS); IPR007087 (PROSITE_PROFILES); IPR007087 (PROSITE_PROFILES); IPR007087 (PROSITE_PROFILES); IPR007087 (PROSITE_PROFILES); IPR007087 (PROSITE_PROFILES); SSF57667 (SUPERFAMILY); SSF57667 (SUPERFAMILY); SSF57667 (SUPERFAMILY); SSF57667 (SUPERFAMILY) |
| 1089 | 467121_length_1098_cvg_12.2_tip_1_5 | 70  | protein spaetzle                                        | 356 | 8.86E-28 | 51.90% | 0.141   | PTHR23199 (PANTHER); NON_CYTOPLASMIC_DOMAIN (PHOBIUS); CYTOPLASMIC_DOMAIN (PHOBIUS); TRANSMEMBRANE (PHOBIUS); IPR029034 (SUPERFAMILY); TMhelix (TMHMM)                                                                                                                                                                                                                                                                                                                                                                                                                                                                             |
| 1066 | 465025_length_1070_cvg_3.0_tip_1_3  | 15  | otogelin                                                | 357 | 1.29E-14 | 44.40% | 0.11    | no IPS match                                                                                                                                                                                                                                                                                                                                                                                                                                                                                                                                                                                                                       |
| 1067 | 465069_length_1071_cvg_62.7_tip_1_1 | 782 | thioredoxin 1                                           | 357 | 4.84E-49 | 83.30% | 0.254   | PR00421 (PRINTS); IPR012336 (G3DSA:3.40.30.GENE3D); IPR005746 (TIGRFAM); IPR013766 (PFAM); IPR005746 (PANTHER); IPR017937 (PROSITE_PATTERNS); TRANSMEMBRANE (PHOBIUS); TRANSMEMBRANE (PHOBIUS); TRANSMEMBRANE (PHOBIUS); NON_CYTOPLASMIC_DOMAIN (PHOBIUS); NON_CYTOPLASMIC_DOMAIN (PHOBIUS); TRANSMEMBRANE (PHOBIUS); NON_CYTOPLASMIC_DOMAIN (PHOBIUS); CYTOPLASMIC_DOMAIN (PHOBIUS); CYTOPLASMIC_DOMAIN (PHOBIUS); CYTOPLASMIC_DOMAIN (PHOBIUS); IPR012336 (PROSITE_PROFILES); IPR012336 (SUPERFAMILY); TMhelix (TMHMM); TMhelix (TMHMM); TMhelix (TMHMM); TMhelix (TMHMM); TMhelix (TMHMM); TMhelix (TMHMM)                      |

|      |                                      |       |                                                           |     |           |        |         |                                                                                                                                                                                                                                                                                                                                                                                                                                                                                   |
|------|--------------------------------------|-------|-----------------------------------------------------------|-----|-----------|--------|---------|-----------------------------------------------------------------------------------------------------------------------------------------------------------------------------------------------------------------------------------------------------------------------------------------------------------------------------------------------------------------------------------------------------------------------------------------------------------------------------------|
| 1068 | 465169_length_1072_cvg_107.3_tip_0_4 | 61379 | proclotting enzyme-like                                   | 357 | 4.08E-50  | 55.20% | 0.860 Y | IPR001314 (PRINTS); IPR001254 (SMART); G3DSA:2.40.10.10 (GENE3D); G3DSA:2.40.10.10 (GENE3D); G3DSA:2.40.10.10 (GENE3D); IPR001254 (PFAM); PTHR24268 (PANTHER); IPR018114 (PROSITE_PATTERNS); IPR018114 (PROSITE_PATTERNS); SIGNAL_PEPTIDE_H_REGION (PHOBIUS); SIGNAL_PEPTIDE_C_REGION (PHOBIUS); NON_CYTOPLASMIC_DOMAIN (PHOBIUS); SIGNAL_PEPTIDE_N_REGION (PHOBIUS); SIGNAL_PEPTIDE (PHOBIUS); IPR001254 (PROSITE_PROFILES); SignalP-noTM (SIGNALP_EUK); IPR009003 (SUPERFAMILY) |
| 1070 | 465191_length_1073_cvg_32.3_tip_1_3  | 153   | peroxiredoxin partial                                     | 358 | 8.00E-116 | 83.50% | 0.143   | IPR000866 (PFAM); IPR012336 (G3DSA:3.40.30.GENE3D); G3DSA:3.30.1020.10 (GENE3D); IPR019479 (PFAM); PTHR10681 (PANTHER); PTHR10681:SF77 (PANTHER); TRANSMEMBRANE (PHOBIUS); NON_CYTOPLASMIC_DOMAIN (PHOBIUS); CYTOPLASMIC_DOMAIN (PHOBIUS); IPR012336 (PROSITE_PROFILES); IPR012336 (SUPERFAMILY); TMhelix (TMHMM)                                                                                                                                                                 |
| 1071 | 465395_length_1075_cvg_3.5_tip_1_1   | 17    | galectin partial                                          | 358 | 8.14E-70  | 67.20% | 0.099   | IPR001079 (SMART); IPR001079 (SMART); IPR013320 (G3DSA:2.60.120.GENE3D); IPR001079 (PFAM); PTHR11346 (PANTHER); NON_CYTOPLASMIC_DOMAIN (PHOBIUS); TRANSMEMBRANE (PHOBIUS); CYTOPLASMIC_DOMAIN (PHOBIUS); TRANSMEMBRANE (PHOBIUS); NON_CYTOPLASMIC_DOMAIN (PHOBIUS); IPR001079 (PROSITE_PROFILES); IPR013320 (SUPERFAMILY); TMhelix (TMHMM)                                                                                                                                        |
| 1072 | 465495_length_1076_cvg_4.1_tip_1_5   | 25    | scp-like extracellular domain containing protein 1        | 358 | 1.92E-47  | 52.30% | 0.574 Y | IPR002413 (PRINTS); IPR001283 (PRINTS); IPR002172 (SMART); IPR014044 (SMART); IPR002172 (PFAM); IPR002172 (G3DSA:4.10.400.GENE3D); IPR014044 (PFAM); IPR014044 (G3DSA:3.40.33.GENE3D); IPR001283 (PANTHER); IPR018244 (PROSITE_PATTERNS); IPR023415 (PROSITE_PATTERNS); IPR018244 (PROSITE_PATTERNS); IPR002172 (PROSITE_PROFILES); SignalP-noTM (SIGNALP_EUK); IPR014044 (SUPERFAMILY); IPR002172 (SUPERFAMILY)                                                                  |
| 1073 | 465689_length_1079_cvg_7.3_tip_1_0   | 36    | transposase                                               | 360 | 1.12E-42  | 57.50% | 0.205   | no IPS match                                                                                                                                                                                                                                                                                                                                                                                                                                                                      |
| 1074 | 465743_length_1079_cvg_53.0_tip_1_3  | 383   | peptidoglycan recognition protein 3 short class           | 360 | 4.51E-58  | 65.10% | 0.810 Y | IPR002502 (SMART); IPR006619 (SMART); IPR002502 (G3DSA:3.40.80.GENE3D); IPR002502 (PFAM); IPR015510 (PANTHER); SIGNAL_PEPTIDE_N_REGION (PHOBIUS); SIGNAL_PEPTIDE (PHOBIUS); NON_CYTOPLASMIC_DOMAIN (PHOBIUS); SIGNAL_PEPTIDE_C_REGION (PHOBIUS); SIGNAL_PEPTIDE_H_REGION (PHOBIUS); SignalP-noTM (SIGNALP_EUK); IPR002502 (SUPERFAMILY); TMhelix (TMHMM); TMhelix (TMHMM); TMhelix (TMHMM)                                                                                        |
| 1075 | 465757_length_1080_cvg_6.3_tip_1_0   | 29    | beta-mannosidase                                          | 360 | 7.42E-130 | 69.90% | 0.121   | IPR013781 (G3DSA:3.20.20.GENE3D); IPR006103 (PFAM); IPR013812 (G3DSA:2.60.40.GENE3D); PTHR10066 (PANTHER); IPR028369 (PTHR10066:PANTHER); IPR017853 (SUPERFAMILY); IPR006102 (SUPERFAMILY)                                                                                                                                                                                                                                                                                        |
| 1117 | 469523_length_1132_cvg_61.6_tip_1_1  | 3070  | eukaryotic translation initiation factor 3 subunit i-like | 360 | 0         | 84.20% | 0.173   | IPR001680 (SMART); IPR015943 (G3DSA:2.130.10.GENE3D); IPR001680 (PFAM); PTHR19877 (PANTHER); IPR019775 (PROSITE_PATTERNS); IPR001680 (PROSITE_PROFILES); IPR017986 (PROSITE_PROFILES); IPR027525 (HAMAP); IPR001680 (PROSITE_PROFILES); IPR001680 (PROSITE_PROFILES); IPR001680 (PROSITE_PROFILES); IPR017986 (PROSITE_PROFILES); IPR017986 (SUPERFAMILY)                                                                                                                         |
| 1076 | 465869_length_1081_cvg_3.6_tip_1_0   | 20    | xanthine dehydrogenase partial                            | 361 | 2.63E-180 | 81.50% | 0.145   | IPR008274 (G3DSA:3.30.365.GENE3D); IPR008274 (G3DSA:3.30.365.GENE3D); IPR008274 (PFAM); IPR008274 (G3DSA:3.30.365.GENE3D); PTHR11908 (PANTHER); PTHR11908:SF32 (PANTHER); IPR008274 (SUPERFAMILY)                                                                                                                                                                                                                                                                                 |
| 1077 | 465995_length_1083_cvg_9.0_tip_1_1   | 30    | syntaxin-16 isoform x4                                    | 361 | 1.40E-104 | 70.80% | 0.155   | IPR000727 (SMART); IPR006011 (PFAM); G3DSA:1.20.58.70 (GENE3D); IPR000727 (PFAM); PTHR19957:SF83 (PANTHER); PTHR19957 (PANTHER); IPR006012 (PROSITE_PATTERNS); NON_CYTOPLASMIC_DOMAIN (PHOBIUS); TRANSMEMBRANE (PHOBIUS); NON_CYTOPLASMIC_DOMAIN (PHOBIUS); TRANSMEMBRANE (PHOBIUS); CYTOPLASMIC_DOMAIN (PHOBIUS); IPR000727 (PROSITE_PROFILES); IPR010989 (SUPERFAMILY); TMhelix (TMHMM); TMhelix (TMHMM)                                                                        |
| 1078 | 466097_length_1084_cvg_3.1_tip_1_5   | 14    | clip-domain serine family d                               | 361 | 1.02E-08  | 75.60% | 0.12    | G3DSA:2.40.10.10 (GENE3D); IPR001254 (PFAM); PTHR24264:SF9 (PANTHER); PTHR24264 (PANTHER); IPR009003 (SUPERFAMILY)                                                                                                                                                                                                                                                                                                                                                                |
| 1105 | 468399_length_1115_cvg_68.0_tip_1_5  | 673   | scp-like extracellular domain containing protein 2        | 361 | 1.97E-06  | 65.25% | 0.789 Y | IPR002413 (PRINTS); IPR014044 (G3DSA:3.40.33.GENE3D); SIGNAL_PEPTIDE (PHOBIUS); SIGNAL_PEPTIDE_H_REGION (PHOBIUS); NON_CYTOPLASMIC_DOMAIN (PHOBIUS); SIGNAL_PEPTIDE_C_REGION (PHOBIUS); SIGNAL_PEPTIDE_N_REGION (PHOBIUS); SignalP-noTM (SIGNALP_EUK)                                                                                                                                                                                                                             |

|      |                                     |        |                                            |     |           |        |         |                                                                                                                                                                                                                                                                                                                                                                                                                                                                                                                                                                                                                                                                     |
|------|-------------------------------------|--------|--------------------------------------------|-----|-----------|--------|---------|---------------------------------------------------------------------------------------------------------------------------------------------------------------------------------------------------------------------------------------------------------------------------------------------------------------------------------------------------------------------------------------------------------------------------------------------------------------------------------------------------------------------------------------------------------------------------------------------------------------------------------------------------------------------|
| 1079 | 466227_length_1086_cvg_8.2_tip_1_5  | 41     | venom serine carboxypeptidase-like         | 362 | 1.32E-12  | 65.30% | 0.119   | IPR029058 (G3DSA:3.40.50.GENE3D); IPR001563 (PFAM); IPR001563 (PANTHER); TRANSMEMBRANE (PHOBIUS); CYTOPLASMIC_DOMAIN (PHOBIUS); TRANSMEMBRANE (PHOBIUS); NON_CYTOPLASMIC_DOMAIN (PHOBIUS); NON_CYTOPLASMIC_DOMAIN (PHOBIUS); IPR029058 (SUPERFAMILY); TMhelix (TMHMM); TMhelix (TMHMM)                                                                                                                                                                                                                                                                                                                                                                              |
| 1081 | 466557_length_1090_cvg_4.1_tip_1_1  | 24     | chondroitin sulfate synthase 1             | 363 | 2.88E-111 | 64.50% | 0.101   | IPR029044 (G3DSA:3.90.550.GENE3D); IPR008428 (PFAM); PTHR12369 (PANTHER); PTHR12369:SF11 (PANTHER); IPR029044 (SUPERFAMILY)                                                                                                                                                                                                                                                                                                                                                                                                                                                                                                                                         |
| 1102 | 468229_length_1113_cvg_3.2_tip_1_4  | 16     | zinc finger protein 239- partial           | 364 | 1.18E-49  | 57.20% | 0.13    | IPR015880 (SMART); IPR013087 (G3DSA:3.30.160.GENE3D); IPR013087 (G3DSA:3.30.160.GENE3D); PF13465 (PFAM); IPR013087 (G3DSA:3.30.160.GENE3D); IPR007087 (PFAM); IPR013087 (G3DSA:3.30.160.GENE3D); IPR013087 (G3DSA:3.30.160.GENE3D); PTHR24409 (PANTHER); IPR007087 (PROSITE_PATTERNS); IPR007087 (PROSITE_PATTERNS); IPR007087 (PROSITE_PATTERNS); IPR007087 (PROSITE_PATTERNS); IPR007087 (PROSITE_PROFILES); IPR007087 (PROSITE_PROFILES); IPR007087 (PROSITE_PROFILES); IPR007087 (PROSITE_PROFILES); IPR007087 (PROSITE_PROFILES); IPR007087 (PROSITE_PROFILES); SSF57667 (SUPERFAMILY); SSF57667 (SUPERFAMILY); SSF57667 (SUPERFAMILY); SSF57667 (SUPERFAMILY) |
| 1082 | 466729_length_1093_cvg_2.0_tip_1_0  | 14     | tissue factor pathway inhibitor            | 365 | 1.88E-55  | 50.10% | 0.794 Y | IPR002223 (PRINTS); IPR002223 (SMART); IPR002223 (PFAM); IPR002223 (G3DSA:4.10.410.GENE3D); IPR002223 (G3DSA:4.10.410.GENE3D); PTHR10083 (PANTHER); IPR020901 (PROSITE_PATTERNS); IPR020901 (PROSITE_PATTERNS); IPR020901 (PROSITE_PATTERNS); NON_CYTOPLASMIC_DOMAIN (PHOBIUS); SIGNAL_PEPTIDE_N_REGION (PHOBIUS); SIGNAL_PEPTIDE (PHOBIUS); SIGNAL_PEPTIDE_H_REGION (PHOBIUS); SIGNAL_PEPTIDE_C_REGION (PHOBIUS); IPR002223 (PROSITE_PROFILES); IPR002223 (PROSITE_PROFILES); IPR002223 (PROSITE_PROFILES); IPR002223 (PROSITE_PROFILES); SignalP-noTM (SIGNALP_EUK); IPR002223 (SUPERFAMILY); IPR002223 (SUPERFAMILY); IPR002223 (SUPERFAMILY)                    |
| 1083 | 466769_length_1094_cvg_99.5_tip_1_0 | 213697 | isoform a                                  | 365 | 2.63E-44  | 53.50% | 0.776 Y | IPR001314 (PRINTS); IPR001254 (SMART); G3DSA:2.40.10.10 (GENE3D); IPR001254 (PFAM); G3DSA:2.40.10.10 (GENE3D); G3DSA:2.40.10.10 (GENE3D); PTHR24268 (PANTHER); IPR018114 (PROSITE_PATTERNS); IPR018114 (PROSITE_PATTERNS); SIGNAL_PEPTIDE_N_REGION (PHOBIUS); NON_CYTOPLASMIC_DOMAIN (PHOBIUS); SIGNAL_PEPTIDE (PHOBIUS); SIGNAL_PEPTIDE_H_REGION (PHOBIUS); SIGNAL_PEPTIDE_C_REGION (PHOBIUS); IPR001254 (PROSITE_PROFILES); SignalP-noTM (SIGNALP_EUK); IPR009003 (SUPERFAMILY)                                                                                                                                                                                   |
| 1084 | 466899_length_1095_cvg_6.2_tip_1_3  | 27     | neuronal cell adhesion                     | 365 | 1.34E-111 | 70.20% | 0.138   | PR00014 (PRINTS); IPR003961 (SMART); IPR013783 (G3DSA:2.60.40.GENE3D); IPR003961 (PFAM); IPR013783 (G3DSA:2.60.40.GENE3D); IPR013783 (G3DSA:2.60.40.GENE3D); PTHR10489:SF553 (PANTHER); PTHR10489 (PANTHER); IPR003961 (PROSITE_PROFILES); IPR003961 (PROSITE_PROFILES); IPR003961 (PROSITE_PROFILES); IPR003961 (SUPERFAMILY); IPR003961 (SUPERFAMILY); IPR003961 (SUPERFAMILY)                                                                                                                                                                                                                                                                                    |
| 1085 | 466909_length_1095_cvg_2.0_tip_1_3  | 14     | u4 u6 small nuclear ribonucleoprotein prp4 | 365 | 0         | 84.20% | 0.122   | IPR020472 (PRINTS); IPR001680 (SMART); IPR015943 (G3DSA:2.130.10.GENE3D); IPR001680 (PFAM); IPR027106 (PANTHER); IPR019775 (PROSITE_PATTERNS); IPR019775 (PROSITE_PATTERNS); IPR001680 (PROSITE_PROFILES); IPR001680 (PROSITE_PROFILES); IPR001680 (PROSITE_PROFILES); IPR001680 (PROSITE_PROFILES); IPR017986 (PROSITE_PROFILES); IPR001680 (PROSITE_PROFILES); IPR017986 (SUPERFAMILY)                                                                                                                                                                                                                                                                            |
| 1086 | 466923_length_1096_cvg_58.6_tip_1_2 | 355    | aldose reductase-like                      | 365 | 4.20E-137 | 77.50% | 0.101   | IPR020471 (PRINTS); IPR023210 (G3DSA:3.20.20.GENE3D); IPR023210 (PFAM); IPR001395 (PANTHER); PTHR11732:SF202 (PANTHER); IPR018170 (PROSITE_PATTERNS); IPR018170 (PROSITE_PATTERNS); IPR023210 (SUPERFAMILY)                                                                                                                                                                                                                                                                                                                                                                                                                                                         |
| 1087 | 466951_length_1096_cvg_3.3_tip_1_1  | 22     | 5 -nucleotidase                            | 365 | 1.04E-125 | 70.80% | 0.106   | IPR008334 (PFAM); IPR008334 (G3DSA:3.90.780.GENE3D); IPR006179 (PANTHER); PTHR11575:SF7 (PANTHER); IPR008334 (SUPERFAMILY)                                                                                                                                                                                                                                                                                                                                                                                                                                                                                                                                          |
| 1088 | 467011_length_1097_cvg_4.5_tip_1_1  | 26     | ves g 5 allergen                           | 366 | 1.01E-46  | 53.20% | 0.104   | IPR001283 (PRINTS); IPR014044 (SMART); IPR014044 (PFAM); IPR014044 (G3DSA:3.40.33.GENE3D); IPR001283 (PANTHER); IPR018244 (PROSITE_PATTERNS); IPR014044 (SUPERFAMILY)                                                                                                                                                                                                                                                                                                                                                                                                                                                                                               |



|      |                                     |      |                                                              |     |           |        |       |                                                                                                                                                                                                                                                                                                                                                                                                                                                                                                                                                                                                                              |
|------|-------------------------------------|------|--------------------------------------------------------------|-----|-----------|--------|-------|------------------------------------------------------------------------------------------------------------------------------------------------------------------------------------------------------------------------------------------------------------------------------------------------------------------------------------------------------------------------------------------------------------------------------------------------------------------------------------------------------------------------------------------------------------------------------------------------------------------------------|
| 1098 | 468075_length_1111_cvg_5.0_tip_1_4  | 30   | adp-ribosylation factor-like protein 3                       | 370 | 1.32E-109 | 93.90% | 0.227 | IPR006689 (PRINTS); IPR024156 (SMART); IPR003579 (SMART); IPR006687 (SMART); IPR005225 (TIGRFAM); IPR027417 (G3DSA:3.40.50.GENE3D); IPR006689 (PFAM); PTHR11711 (PANTHER); PTHR11711:SF124 (PANTHER); CYTOPLASMIC_DOMAIN (PHOBIUS); TRANSMEMBRANE (PHOBIUS); TRANSMEMBRANE (PHOBIUS); NON_CYTOPLASMIC_DOMAIN (PHOBIUS); NON_CYTOPLASMIC_DOMAIN (PHOBIUS); IPR024156 (PROSITE_PROFILES); IPR027417 (SUPERFAMILY); TMhelix (TMHMM)                                                                                                                                                                                             |
| 1100 | 468141_length_1112_cvg_8.4_tip_1_5  | 37   | gastrula zinc finger                                         | 370 | 7.04E-31  | 57.40% | 0.109 | IPR015880 (SMART); PF13894 (PFAM); PF13465 (PFAM); IPR013087 (G3DSA:3.30.160.GENE3D); IPR013087 (G3DSA:3.30.160.GENE3D); IPR013087 (G3DSA:3.30.160.GENE3D); PTHR24409 (PANTHER); IPR007087 (PROSITE_PATTERNS); IPR007087 (PROSITE_PATTERNS); IPR007087 (PROSITE_PATTERNS); IPR007087 (PROSITE_PATTERNS); IPR007087 (PROSITE_PATTERNS); NON_CYTOPLASMIC_DOMAIN (PHOBIUS); CYTOPLASMIC_DOMAIN (PHOBIUS); IPR007087 (PROSITE_PROFILES); IPR007087 (PROSITE_PROFILES); IPR007087 (PROSITE_PROFILES); IPR007087 (PROSITE_PROFILES); IPR007087 (PROSITE_PROFILES); SSF57667 (SUPERFAMILY); SSF57667 (SUPERFAMILY); TMhelix (TMHMM) |
| 1099 | 468097_length_1111_cvg_3.4_tip_1_0  | 21   | ankyrin repeat domain-containing protein 5-like              | 371 | 2.04E-18  | 47.80% | 0.1   | PTHR23022:SF64 (PANTHER); PTHR23022 (PANTHER)                                                                                                                                                                                                                                                                                                                                                                                                                                                                                                                                                                                |
| 1101 | 468191_length_1112_cvg_76.6_tip_1_3 | 4330 | glyceraldehyde 3-phosphate dehydrogenase                     | 371 | 1.36E-11  | 90.90% | 0.128 | IPR020831 (PANTHER); TRANSMEMBRANE (PHOBIUS); TRANSMEMBRANE (PHOBIUS); TRANSMEMBRANE (PHOBIUS); CYTOPLASMIC_DOMAIN (PHOBIUS); NON_CYTOPLASMIC_DOMAIN (PHOBIUS); CYTOPLASMIC_DOMAIN (PHOBIUS); TRANSMEMBRANE (PHOBIUS); CYTOPLASMIC_DOMAIN (PHOBIUS); NON_CYTOPLASMIC_DOMAIN (PHOBIUS); TMhelix (TMHMM); TMhelix (TMHMM); TMhelix (TMHMM)                                                                                                                                                                                                                                                                                     |
| 1103 | 468245_length_1113_cvg_2.7_tip_1_1  | 17   | metallophosphoesterase domain-containing protein 1           | 371 | 1.59E-116 | 81.20% | 0.107 | IPR004843 (PFAM); IPR029052 (G3DSA:3.60.21.GENE3D); PTHR12905 (PANTHER); IPR029052 (SUPERFAMILY)                                                                                                                                                                                                                                                                                                                                                                                                                                                                                                                             |
| 1124 | 469853_length_1137_cvg_10.9_tip_1_4 | 72   | chitinase partial                                            | 371 | 1.46E-66  | 67.10% | 0.144 | IPR002557 (SMART); IPR029070 (G3DSA:3.10.50.GENE3D); IPR002557 (G3DSA:2.170.140.GENE3D); IPR002557 (PFAM); IPR013781 (G3DSA:3.20.20.GENE3D); IPR001223 (PFAM); PTHR11177:SF112 (PANTHER); PTHR11177 (PANTHER); IPR002557 (PROSITE_PROFILES); IPR002557 (SUPERFAMILY); IPR017853 (SUPERFAMILY); IPR029070 (SUPERFAMILY)                                                                                                                                                                                                                                                                                                       |
| 1104 | 468297_length_1114_cvg_2.7_tip_1_0  | 12   | upf0364 protein c6orf211 homolog                             | 372 | 9.35E-96  | 60.50% | 0.101 | Coil (COILS); IPR002791 (PFAM); PTHR12260:SF1 (PANTHER); PTHR12260 (PANTHER); IPR002791 (SUPERFAMILY)                                                                                                                                                                                                                                                                                                                                                                                                                                                                                                                        |
| 1106 | 468431_length_1115_cvg_6.3_tip_1_1  | 36   | preproneuropeptide f i                                       | 372 | 1.58E-17  | 63.75% | 0.142 | IPR020392 (PROSITE_PATTERNS); TRANSMEMBRANE (PHOBIUS); NON_CYTOPLASMIC_DOMAIN (PHOBIUS); CYTOPLASMIC_DOMAIN (PHOBIUS); IPR001955 (PROSITE_PROFILES); TMhelix (TMHMM); TMhelix (TMHMM); TMhelix (TMHMM)                                                                                                                                                                                                                                                                                                                                                                                                                       |
| 1107 | 468461_length_1116_cvg_3.8_tip_1_2  | 24   | cysteine-rich with egf-like domain protein 2                 | 372 | 3.58E-48  | 67.30% | 0.112 | IPR006212 (SMART); PTHR24838:SF13 (PANTHER); PTHR24838 (PANTHER); IPR018097 (PROSITE_PATTERNS); TRANSMEMBRANE (PHOBIUS); TRANSMEMBRANE (PHOBIUS); NON_CYTOPLASMIC_DOMAIN (PHOBIUS); CYTOPLASMIC_DOMAIN (PHOBIUS); CYTOPLASMIC_DOMAIN (PHOBIUS); TRANSMEMBRANE (PHOBIUS); NON_CYTOPLASMIC_DOMAIN (PHOBIUS); TRANSMEMBRANE (PHOBIUS); NON_CYTOPLASMIC_DOMAIN (PHOBIUS); TRANSMEMBRANE (PHOBIUS); CYTOPLASMIC_DOMAIN (PHOBIUS); IPR009030 (SUPERFAMILY); TMhelix (TMHMM); TMhelix (TMHMM)                                                                                                                                       |
| 1109 | 468545_length_1117_cvg_25.3_tip_1_1 | 109  | thioredoxin 2                                                | 372 | 2.69E-34  | 70.70% | 0.14  | IPR013766 (PFAM); IPR012336 (G3DSA:3.40.30.GENE3D); PTHR10438:SF235 (PANTHER); IPR005746 (PANTHER); NON_CYTOPLASMIC_DOMAIN (PHOBIUS); CYTOPLASMIC_DOMAIN (PHOBIUS); TRANSMEMBRANE (PHOBIUS); IPR012336 (PROSITE_PROFILES); IPR012336 (SUPERFAMILY); TMhelix (TMHMM)                                                                                                                                                                                                                                                                                                                                                          |
| 1133 | 470195_length_1143_cvg_20.4_tip_1_0 | 127  | dehydrogenase reductase sdr family member 11-like            | 372 | 1.90E-42  | 73.30% | 0.109 | IPR002198 (PRINTS); IPR002347 (PRINTS); IPR016040 (G3DSA:3.40.50.GENE3D); PTHR24322:SF310 (PANTHER); PTHR24322 (PANTHER); SSF51735 (SUPERFAMILY)                                                                                                                                                                                                                                                                                                                                                                                                                                                                             |
| 1146 | 471119_length_1158_cvg_69.2_tip_1_2 | 1338 | guanine nucleotide-binding protein subunit beta-like protein | 372 | 0         | 93.20% | 0.136 | IPR020472 (PRINTS); IPR001680 (SMART); IPR015943 (G3DSA:2.130.10.GENE3D); IPR001680 (PFAM); IPR015943 (G3DSA:2.130.10.GENE3D); PTHR19868:SF0 (PANTHER); PTHR19868 (PANTHER); IPR019775 (PROSITE_PATTERNS); IPR019775 (PROSITE_PATTERNS); IPR019775 (PROSITE_PATTERNS); IPR019775 (PROSITE_PATTERNS); IPR001680 (PROSITE_PROFILES); IPR001680 (PROSITE_PROFILES); IPR001680 (PROSITE_PROFILES); IPR001680 (PROSITE_PROFILES); IPR017986 (PROSITE_PROFILES); IPR001680 (PROSITE_PROFILES); IPR017986 (SUPERFAMILY)                                                                                                             |



|      |                                     |       |                                                    |     |           |        |         |                                                                                                                                                                                                                                                                                                                                                                                                                                                                                                                                                                                                                                                             |
|------|-------------------------------------|-------|----------------------------------------------------|-----|-----------|--------|---------|-------------------------------------------------------------------------------------------------------------------------------------------------------------------------------------------------------------------------------------------------------------------------------------------------------------------------------------------------------------------------------------------------------------------------------------------------------------------------------------------------------------------------------------------------------------------------------------------------------------------------------------------------------------|
| 1108 | 468519_length_1117_cvg_12.9_tip_1_0 | 66    | zinc finger protein                                | 373 | 1.24E-35  | 56.90% | 0.101   | IPR015880 (SMART); IPR013087 (G3DSA:3.30.160.GENE3D); IPR013087 (G3DSA:3.30.160.GENE3D); PF13894 (PFAM); PF13465 (PFAM); IPR013087 (G3DSA:3.30.160.GENE3D); PTHR24409 (PANTHER); IPR007087 (PROSITE_PATTERNS); IPR007087 (PROSITE_PATTERNS); IPR007087 (PROSITE_PATTERNS); IPR007087 (PROSITE_PATTERNS); IPR007087 (PROSITE_PATTERNS); CYTOPLASMIC_DOMAIN (PHOBIUS); NON_CYTOPLASMIC_DOMAIN (PHOBIUS); IPR007087 (PROSITE_PROFILES); IPR007087 (PROSITE_PROFILES); IPR007087 (PROSITE_PROFILES); IPR007087 (PROSITE_PROFILES); SSF57667 (SUPERFAMILY); SSF57667 (SUPERFAMILY); TMhelix (TMHMM)                                                              |
| 1110 | 468657_length_1118_cvg_4.0_tip_1_4  | 21    | zinc finger protein 420-like                       | 373 | 1.80E-37  | 61.10% | 0.098   | IPR015880 (SMART); PF13894 (PFAM); IPR013087 (G3DSA:3.30.160.GENE3D); PF13465 (PFAM); IPR013087 (G3DSA:3.30.160.GENE3D); PTHR24409:SF13 (PANTHER); PTHR24409 (PANTHER); IPR007087 (PROSITE_PATTERNS); IPR007087 (PROSITE_PATTERNS); IPR007087 (PROSITE_PATTERNS); IPR007087 (PROSITE_PATTERNS); CYTOPLASMIC_DOMAIN (PHOBIUS); TRANSMEMBRANE (PHOBIUS); NON_CYTOPLASMIC_DOMAIN (PHOBIUS); NON_CYTOPLASMIC_DOMAIN (PHOBIUS); IPR007087 (PROSITE_PROFILES); IPR007087 (PROSITE_PROFILES); IPR007087 (PROSITE_PROFILES); IPR007087 (PROSITE_PROFILES); SSF57667 (SUPERFAMILY); SSF57667 (SUPERFAMILY); SSF57667 (SUPERFAMILY); TMhelix (TMHMM); TMhelix (TMHMM) |
| 1119 | 469579_length_1133_cvg_22.4_tip_1_4 | 109   | e3 ubiquitin-protein ligase rnf185-like isoform x2 | 373 | 1.31E-86  | 81.00% | 0.1     | IPR001841 (SMART); PF13923 (PFAM); IPR013083 (G3DSA:3.30.40.GENE3D); PTHR12313:SF3 (PANTHER); PTHR12313 (PANTHER); IPR017907 (PROSITE_PATTERNS); CYTOPLASMIC_DOMAIN (PHOBIUS); TRANSMEMBRANE (PHOBIUS); CYTOPLASMIC_DOMAIN (PHOBIUS); NON_CYTOPLASMIC_DOMAIN (PHOBIUS); TRANSMEMBRANE (PHOBIUS); TRANSMEMBRANE (PHOBIUS); NON_CYTOPLASMIC_DOMAIN (PHOBIUS); IPR001841 (PROSITE_PROFILES); SSF57850 (SUPERFAMILY); TMhelix (TMHMM); TMhelix (TMHMM); TMhelix (TMHMM); TMhelix (TMHMM); TMhelix (TMHMM)                                                                                                                                                       |
| 1156 | 471717_length_1167_cvg_82.4_tip_1_4 | 24389 | venom allergen 3-like                              | 373 | 5.77E-45  | 50.10% | 0.174   | IPR002413 (PRINTS); IPR001283 (PRINTS); IPR014044 (SMART); IPR014044 (G3DSA:3.40.33.GENE3D); IPR014044 (PFAM); IPR001283 (PANTHER); CYTOPLASMIC_DOMAIN (PHOBIUS); NON_CYTOPLASMIC_DOMAIN (PHOBIUS); TRANSMEMBRANE (PHOBIUS); IPR014044 (SUPERFAMILY); TMhelix (TMHMM)                                                                                                                                                                                                                                                                                                                                                                                       |
| 1111 | 469029_length_1124_cvg_73.7_tip_1_2 | 2389  | gamma-glutamyl hydrolase                           | 374 | 3.14E-30  | 68.00% | 0.1     | IPR029062 (G3DSA:3.40.50.GENE3D); IPR015527 (PANTHER); IPR015527 (PROSITE_PROFILES); IPR029062 (SUPERFAMILY)                                                                                                                                                                                                                                                                                                                                                                                                                                                                                                                                                |
| 1151 | 471559_length_1164_cvg_6.2_tip_1_1  | 39    | dentin matrix protein 4-like                       | 374 | 0         | 85.00% | 0.099   | IPR009581 (PFAM); IPR024869 (PANTHER); PTHR12450:SF8 (PANTHER) PR00421 (PRINTS); IPR005788 (TIGRFAM); IPR012336 (G3DSA:3.40.30.GENE3D); PF13848 (PFAM); IPR013766 (PFAM); PTHR18929:SF60 (PANTHER); PTHR18929 (PANTHER); IPR017937 (PROSITE_PATTERNS); IPR012336 (PROSITE_PROFILES); IPR012336 (SUPERFAMILY)                                                                                                                                                                                                                                                                                                                                                |
| 1112 | 469049_length_1124_cvg_63.0_tip_0_3 | 4759  | protein disulfide-isomerase a3                     | 375 | 1.13E-113 | 82.50% | 0.119   | IPR012336 (G3DSA:3.40.30.GENE3D); IPR013766 (PFAM); PTHR18929:SF81 (PANTHER); PTHR18929 (PANTHER); IPR017937 (PROSITE_PATTERNS); SIGNAL_PEPTIDE_C_REGION (PHOBIUS); SIGNAL_PEPTIDE (PHOBIUS); TRANSMEMBRANE (PHOBIUS); SIGNAL_PEPTIDE_H_REGION (PHOBIUS); SIGNAL_PEPTIDE_N_REGION (PHOBIUS); CYTOPLASMIC_DOMAIN (PHOBIUS); NON_CYTOPLASMIC_DOMAIN (PHOBIUS); IPR012336 (PROSITE_PROFILES); IPR012336 (SUPERFAMILY); TMhelix (TMHMM); TMhelix (TMHMM)                                                                                                                                                                                                        |
| 1127 | 469959_length_1138_cvg_12.7_tip_1_0 | 78    | thioredoxin-related transmembrane protein 1        | 375 | 7.31E-102 | 71.20% | 0.462 Y | IPR001079 (SMART); IPR001079 (SMART); IPR013320 (G3DSA:2.60.120.GENE3D); IPR001079 (PFAM); IPR013320 (G3DSA:2.60.120.GENE3D); PTHR11346 (PANTHER); IPR001079 (PROSITE_PROFILES); IPR001079 (PROSITE_PROFILES); IPR013320 (SUPERFAMILY); IPR013320 (SUPERFAMILY)                                                                                                                                                                                                                                                                                                                                                                                             |
| 1113 | 469171_length_1126_cvg_95.8_tip_1_0 | 9527  | low quality protein: galectin-4                    | 376 | 5.64E-51  | 50.50% | 0.410 Y | IPR018497 (PRINTS); IPR024079 (G3DSA:3.40.390.GENE3D); IPR018497 (PFAM); IPR000718 (PANTHER); PTHR11733:SF113 (PANTHER); TRANSMEMBRANE (PHOBIUS); NON_CYTOPLASMIC_DOMAIN (PHOBIUS); CYTOPLASMIC_DOMAIN (PHOBIUS); TRANSMEMBRANE (PHOBIUS); NON_CYTOPLASMIC_DOMAIN (PHOBIUS); TRANSMEMBRANE (PHOBIUS); CYTOPLASMIC_DOMAIN (PHOBIUS); SSF55486 (SUPERFAMILY); TMhelix (TMHMM); TMhelix (TMHMM)                                                                                                                                                                                                                                                                |
| 1114 | 469195_length_1127_cvg_4.8_tip_1_1  | 25    | membrane metallo-endopeptidase-like 1-like         | 376 | 1.01E-91  | 84.90% | 0.148   |                                                                                                                                                                                                                                                                                                                                                                                                                                                                                                                                                                                                                                                             |

|      |                                     |      |                                                 |     |           |        |       |                                                                                                                                                                                                                                                                                                                                                                                                                                                                                                                                                                                                                                                                                        |
|------|-------------------------------------|------|-------------------------------------------------|-----|-----------|--------|-------|----------------------------------------------------------------------------------------------------------------------------------------------------------------------------------------------------------------------------------------------------------------------------------------------------------------------------------------------------------------------------------------------------------------------------------------------------------------------------------------------------------------------------------------------------------------------------------------------------------------------------------------------------------------------------------------|
| 1165 | 472193_length_1174_cvg_60.5_tip_1_2 | 602  | mitochondrial acyl carrier protein 1 isoform b  | 376 | 1.40E-42  | 85.30% | 0.115 | IPR009081 (PFAM); IPR009081 (G3DSA:1.10.1200.GENE3D); PTHR20863 (PANTHER); PTHR20863:SF5 (PANTHER); NON_CYTOPLASMIC_DOMAIN (PHOBIUS); NON_CYTOPLASMIC_DOMAIN (PHOBIUS); TRANSMEMBRANE (PHOBIUS); CYTOPLASMIC_DOMAIN (PHOBIUS); TRANSMEMBRANE (PHOBIUS); IPR003231 (PRODOM); IPR003231 (HAMAP); IPR009081 (PROSITE_PROFILES); IPR009081 (SUPERFAMILY); TMhelix (TMHMM); TMhelix (TMHMM)                                                                                                                                                                                                                                                                                                 |
| 1116 | 469515_length_1132_cvg_4.5_tip_1_1  | 30   | zinc finger protein                             | 377 | 2.12E-57  | 66.20% | 0.177 | IPR015880 (SMART); IPR007087 (PFAM); IPR013087 (G3DSA:3.30.160.GENE3D); PF13465 (PFAM); IPR013087 (G3DSA:3.30.160.GENE3D); IPR013087 (G3DSA:3.30.160.GENE3D); PTHR24409 (PANTHER); IPR007087 (PROSITE_PATTERNS); IPR007087 (PROSITE_PATTERNS); IPR007087 (PROSITE_PATTERNS); IPR007087 (PROSITE_PATTERNS); IPR007087 (PROSITE_PATTERNS); TRANSMEMBRANE (PHOBIUS); NON_CYTOPLASMIC_DOMAIN (PHOBIUS); CYTOPLASMIC_DOMAIN (PHOBIUS); IPR007087 (PROSITE_PROFILES); IPR007087 (PROSITE_PROFILES); IPR007087 (PROSITE_PROFILES); IPR007087 (PROSITE_PROFILES); IPR007087 (PROSITE_PROFILES); SSF57667 (SUPERFAMILY); SSF57667 (SUPERFAMILY); SSF57667 (SUPERFAMILY); SSF57667 (SUPERFAMILY) |
| 1149 | 471387_length_1162_cvg_66.7_tip_1_2 | 2739 | thioredoxin peroxidase                          | 377 | 1.67E-118 | 88.20% | 0.107 | IPR012336 (G3DSA:3.40.30.GENE3D); IPR019479 (PFAM); IPR000866 (PFAM); PTHR10681 (PANTHER); PTHR10681:SF101 (PANTHER); IPR012336 (PROSITE_PROFILES); IPR012336 (SUPERFAMILY)                                                                                                                                                                                                                                                                                                                                                                                                                                                                                                            |
| 1118 | 469563_length_1133_cvg_5.5_tip_1_3  | 29   | heat shock 70 kda protein 14                    | 378 | 1.80E-105 | 61.60% | 0.163 | IPR013126 (PRINTS); IPR029047 (G3DSA:2.60.34.GENE3D); IPR013126 (PFAM); G3DSA:3.30.420.40 (GENE3D); G3DSA:3.30.420.40 (GENE3D); G3DSA:3.90.640.10 (GENE3D); PTHR19375 (PANTHER); PTHR19375:SF158 (PANTHER); IPR018181 (PROSITE_PATTERNS); SSF53067 (SUPERFAMILY); IPR029047 (SUPERFAMILY)                                                                                                                                                                                                                                                                                                                                                                                              |
| 1120 | 469627_length_1133_cvg_4.0_tip_1_1  | 26   | fasciclin-3 isoform x2                          | 378 | 7.93E-29  | 46.00% | 0.241 | IPR003599 (SMART); IPR013783 (G3DSA:2.60.40.GENE3D); IPR013783 (G3DSA:2.60.40.GENE3D); IPR013098 (PFAM); IPR013162 (PFAM); PTHR11640 (PANTHER); PTHR11640:SF52 (PANTHER); IPR007110 (PROSITE_PROFILES); IPR007110 (PROSITE_PROFILES); SSF48726 (SUPERFAMILY); SSF48726 (SUPERFAMILY)                                                                                                                                                                                                                                                                                                                                                                                                   |
| 1145 | 471109_length_1158_cvg_52.1_tip_1_5 | 305  | pacifastin light chain                          | 378 | 3.33E-16  | 51.40% | 0.102 | IPR008037 (PFAM); NON_CYTOPLASMIC_DOMAIN (PHOBIUS); NON_CYTOPLASMIC_DOMAIN (PHOBIUS); TRANSMEMBRANE (PHOBIUS); CYTOPLASMIC_DOMAIN (PHOBIUS); TRANSMEMBRANE (PHOBIUS); IPR020862 (PROSITE_PROFILES); IPR020862 (PROSITE_PROFILES); IPR020862 (PROSITE_PROFILES); IPR008037 (SUPERFAMILY); IPR008037 (SUPERFAMILY); TMhelix (TMHMM); TMhelix (TMHMM)                                                                                                                                                                                                                                                                                                                                     |
| 1121 | 469707_length_1135_cvg_7.6_tip_1_0  | 53   | transcription initiation factor tfiid subunit 5 | 379 | 1.35E-126 | 84.70% | 0.303 | IPR020472 (PRINTS); IPR001680 (SMART); IPR001680 (PFAM); IPR015943 (G3DSA:2.130.10.GENE3D); PTHR19879 (PANTHER); PTHR19879:SF1 (PANTHER); IPR019775 (PROSITE_PATTERNS); IPR019775 (PROSITE_PATTERNS); CYTOPLASMIC_DOMAIN (PHOBIUS); TRANSMEMBRANE (PHOBIUS); TRANSMEMBRANE (PHOBIUS); NON_CYTOPLASMIC_DOMAIN (PHOBIUS); NON_CYTOPLASMIC_DOMAIN (PHOBIUS); IPR017986 (PROSITE_PROFILES); IPR001680 (PROSITE_PROFILES); IPR001680 (PROSITE_PROFILES); IPR001680 (PROSITE_PROFILES); IPR017986 (SUPERFAMILY); TMhelix (TMHMM); TMhelix (TMHMM)                                                                                                                                            |
| 1122 | 469837_length_1137_cvg_6.4_tip_1_1  | 49   | kettin protein                                  | 379 | 8.76E-167 | 75.20% | 0.104 | IPR003599 (SMART); IPR003598 (SMART); IPR013783 (G3DSA:2.60.40.GENE3D); IPR013098 (PFAM); IPR013783 (G3DSA:2.60.40.GENE3D); IPR013783 (G3DSA:2.60.40.GENE3D); PTHR19897:SF149 (PANTHER); PTHR19897 (PANTHER); IPR007110 (PROSITE_PROFILES); IPR007110 (PROSITE_PROFILES); IPR007110 (PROSITE_PROFILES); SSF48726 (SUPERFAMILY); SSF48726 (SUPERFAMILY); SSF48726 (SUPERFAMILY); SSF48726 (SUPERFAMILY)                                                                                                                                                                                                                                                                                 |



|      |                                     |      |                                                                         |     |           |        |       |                                                                                                                                                                                                                                                                                                                                                                                                                                                       |
|------|-------------------------------------|------|-------------------------------------------------------------------------|-----|-----------|--------|-------|-------------------------------------------------------------------------------------------------------------------------------------------------------------------------------------------------------------------------------------------------------------------------------------------------------------------------------------------------------------------------------------------------------------------------------------------------------|
| 1134 | 470201_length_1143_cvg_64.3_tip_1_1 | 3385 | ion transport peptide isoform x2                                        | 381 | 1.74E-30  | 77.70% | 0.106 | IPR000346 (PRINTS); IPR001166 (PRINTS); IPR001166 (G3DSA:1.10.2010.GENE3D); IPR001166 (PFAM); IPR018251 (PROSITE_PATTERNS); TRANSMEMBRANE (PHOBIUS); TRANSMEMBRANE (PHOBIUS); CYTOPLASMIC_DOMAIN (PHOBIUS); TRANSMEMBRANE (PHOBIUS); CYTOPLASMIC_DOMAIN (PHOBIUS); NON_CYTOPLASMIC_DOMAIN (PHOBIUS); NON_CYTOPLASMIC_DOMAIN (PHOBIUS); SignalP-TM (SIGNALP_GRAM_POSITIVE); IPR001166 (SUPERFAMILY); TMhelix (TMHMM); TMhelix (TMHMM); TMhelix (TMHMM) |
| 1135 | 470241_length_1143_cvg_4.7_tip_1_3  | 18   | multiple pdz domain                                                     | 381 | 3.47E-110 | 75.80% | 0.113 | IPR001478 (SMART); IPR001478 (G3DSA:2.30.42.GENE3D); IPR001478 (PFAM); IPR001478 (G3DSA:2.30.42.GENE3D); PTHR19964 (PANTHER); PTHR19964:SF34 (PANTHER); IPR001478 (PROSITE_PROFILES); IPR001478 (PROSITE_PROFILES); IPR001478 (SUPERFAMILY); IPR001478 (SUPERFAMILY)                                                                                                                                                                                  |
| 1136 | 470241_length_1143_cvg_4.7_tip_1_5  | 18   | multiple pdz domain                                                     | 381 | 4.62E-31  | 91.70% | 0.182 | IPR001478 (SMART); IPR001478 (G3DSA:2.30.42.GENE3D); IPR001478 (PFAM); PTHR19964 (PANTHER); PTHR19964:SF10 (PANTHER); IPR001478 (PROSITE_PROFILES); IPR001478 (SUPERFAMILY)                                                                                                                                                                                                                                                                           |
| 1155 | 471657_length_1166_cvg_8.8_tip_1_3  | 54   | basement membrane-specific heparan sulfate proteoglycan core isoform x4 | 381 | 1.10E-86  | 77.00% | 0.14  | IPR013106 (SMART); IPR003599 (SMART); IPR003598 (SMART); IPR013783 (G3DSA:2.60.40.GENE3D); IPR013098 (PFAM); IPR013106 (PFAM); IPR013783 (G3DSA:2.60.40.GENE3D); PTHR23279 (PANTHER); TRANSMEMBRANE (PHOBIUS); NON_CYTOPLASMIC_DOMAIN (PHOBIUS); CYTOPLASMIC_DOMAIN (PHOBIUS); IPR007110 (PROSITE_PROFILES); IPR007110 (PROSITE_PROFILES); SSF48726 (SUPERFAMILY); SSF48726 (SUPERFAMILY)                                                             |
| 1157 | 471857_length_1169_cvg_64.4_tip_1_0 | 651  | histone -like                                                           | 381 | 2.50E-80  | 99.20% | 0.174 | IPR002119 (PRINTS); IPR002119 (SMART); IPR007125 (PFAM); IPR009072 (G3DSA:1.10.20.GENE3D); PTHR23430:SF34 (PANTHER); PTHR23430 (PANTHER); IPR002119 (PROSITE_PATTERNS); IPR009072 (SUPERFAMILY)                                                                                                                                                                                                                                                       |
| 1137 | 470347_length_1145_cvg_9.5_tip_1_0  | 42   | dnaj homolog subfamily c member 30-like                                 | 382 | 1.10E-26  | 51.20% | 0.123 | IPR001623 (PRINTS); IPR001623 (SMART); IPR001623 (PFAM); IPR001623 (G3DSA:1.10.287.GENE3D); PTHR24078 (PANTHER); PTHR24078:SF171 (PANTHER); IPR018253 (PROSITE_PATTERNS); CYTOPLASMIC_DOMAIN (PHOBIUS); TRANSMEMBRANE (PHOBIUS); TRANSMEMBRANE (PHOBIUS); NON_CYTOPLASMIC_DOMAIN (PHOBIUS); CYTOPLASMIC_DOMAIN (PHOBIUS); IPR001623 (PROSITE_PROFILES); IPR001623 (SUPERFAMILY); TMhelix (TMHMM); TMhelix (TMHMM)                                     |
| 1166 | 472231_length_1175_cvg_23.1_tip_1_0 | 141  | i-type lysozyme                                                         | 382 | 1.86E-35  | 64.50% | 0.117 | IPR008597 (PFAM); IPR008597 (PANTHER); IPR018247 (PROSITE_PATTERNS); CYTOPLASMIC_DOMAIN (PHOBIUS); NON_CYTOPLASMIC_DOMAIN (PHOBIUS); TRANSMEMBRANE (PHOBIUS); TMhelix (TMHMM); TMhelix (TMHMM)                                                                                                                                                                                                                                                        |
| 1138 | 470457_length_1147_cvg_6.5_tip_1_3  | 26   | zinc c2h2 type domain-containing protein                                | 383 | 6.69E-19  | 57.90% | 0.101 | IPR015880 (SMART); IPR007087 (PFAM); IPR013087 (G3DSA:3.30.160.GENE3D); PF13465 (PFAM); PTHR24409:SF14 (PANTHER); PTHR24409 (PANTHER); IPR007087 (PROSITE_PATTERNS); IPR007087 (PROSITE_PATTERNS); IPR007087 (PROSITE_PROFILES); IPR007087 (PROSITE_PROFILES); IPR007087 (PROSITE_PROFILES); IPR007087 (PROSITE_PROFILES); SSF57667 (SUPERFAMILY); SSF57667 (SUPERFAMILY)                                                                             |
| 1139 | 470533_length_1148_cvg_4.8_tip_1_1  | 25   | zinc finger protein 585a-like isoform x1                                | 383 | 5.02E-23  | 48.90% | 0.098 | IPR015880 (SMART); IPR007087 (PFAM); IPR013087 (G3DSA:3.30.160.GENE3D); PF13894 (PFAM); IPR013087 (G3DSA:3.30.160.GENE3D); IPR013087 (G3DSA:3.30.160.GENE3D); PTHR24409 (PANTHER); IPR007087 (PROSITE_PATTERNS); IPR007087 (PROSITE_PATTERNS); IPR007087 (PROSITE_PATTERNS); IPR007087 (PROSITE_PROFILES); IPR007087 (PROSITE_PROFILES); IPR007087 (PROSITE_PROFILES); IPR007087 (PROSITE_PROFILES); SSF57667 (SUPERFAMILY); SSF57667 (SUPERFAMILY)   |
| 1140 | 470587_length_1149_cvg_62.8_tip_0_1 | 725  | prolyl 3-hydroxylase 1-like isoform x2                                  | 383 | 1.14E-112 | 68.80% | 0.098 | IPR011990 (G3DSA:1.25.40.GENE3D); PTHR13986 (PANTHER); PTHR13986:SF8 (PANTHER)                                                                                                                                                                                                                                                                                                                                                                        |
| 1141 | 470639_length_1150_cvg_61.9_tip_1_4 | 528  | nucleoporin seh1 isoform x2                                             | 383 | 0         | 85.20% | 0.339 | IPR020472 (PRINTS); IPR001680 (SMART); IPR001680 (PFAM); IPR015943 (G3DSA:2.130.10.GENE3D); PTHR11024:SF3 (PANTHER); PTHR11024 (PANTHER); IPR017986 (PROSITE_PROFILES); IPR001680 (PROSITE_PROFILES); IPR001680 (PROSITE_PROFILES); IPR017986 (PROSITE_PROFILES); IPR017986 (PROSITE_PROFILES); IPR017986 (SUPERFAMILY)                                                                                                                               |

|      |                                     |     |                                                     |     |           |        |         |                                                                                                                                                                                                                                                                                                                                                                                                                                                                                                                                                            |
|------|-------------------------------------|-----|-----------------------------------------------------|-----|-----------|--------|---------|------------------------------------------------------------------------------------------------------------------------------------------------------------------------------------------------------------------------------------------------------------------------------------------------------------------------------------------------------------------------------------------------------------------------------------------------------------------------------------------------------------------------------------------------------------|
| 1142 | 470717_length_1151_cvg_3.0_tip_1_4  | 15  | leucine rich repeat protein                         | 384 | 1.51E-25  | 54.80% | 0.274   | PR00019 (PRINTS); SM00365 (SMART); IPR003591 (SMART); SM00364 (SMART); IPR001611 (PFAM); G3DSA:3.80.10.10 (GENE3D); IPR001611 (PFAM); PTHR24365 (PANTHER); IPR001611 (PROSITE_PROFILES); SSF52058 (SUPERFAMILY); TMhelix (TMHMM)                                                                                                         |
| 1163 | 472107_length_1173_cvg_50.8_tip_1_5 | 357 | leucine-rich repeat-containing protein 57           | 384 | 7.97E-93  | 75.70% | 0.116   | PR00019 (PRINTS); IPR003591 (SMART); IPR025875 (PFAM); IPR001611 (PFAM); G3DSA:3.80.10.10 (GENE3D); G3DSA:3.80.10.10 (GENE3D); PTHR23155 (PANTHER); TRANSMEMBRANE (PHOBIUS); NON_CYTOPLASMIC_DOMAIN (PHOBIUS); CYTOPLASMIC_DOMAIN (PHOBIUS); IPR001611 (PROSITE_PROFILES); IPR001611 (PROSITE_PROFILES); IPR001611 (PROSITE_PROFILES); IPR001611 (PROSITE_PROFILES); IPR001611 (PROSITE_PROFILES); SSF52058 (SUPERFAMILY); TMhelix (TMHMM)                                                                                                                 |
| 1143 | 470847_length_1154_cvg_3.5_tip_1_0  | 20  | vacuolar protein sorting-associated protein 4a-like | 385 | 0         | 89.30% | 0.121   | IPR007330 (SMART); IPR003593 (SMART); IPR007330 (G3DSA:1.20.58.GENE3D); IPR003959 (PFAM); G3DSA:1.10.8.60 (GENE3D); IPR007330 (PFAM); IPR027417 (G3DSA:3.40.50.GENE3D); PTHR23074 (PANTHER); PTHR23074:Sf72 (PANTHER); IPR003960 (PROSITE_PATTERNS); IPR007330 (SUPERFAMILY); IPR027417 (SUPERFAMILY)                                                                                                                                                                                                                                                      |
| 1144 | 471095_length_1158_cvg_7.2_tip_1_5  | 36  | von willebrand factor like 2                        | 386 | 4.31E-09  | 42.20% | 0.107   | no IPS match                                                                                                                                                                                                                                                                                                                                                                                                                                                                                                                                               |
| 1147 | 471201_length_1159_cvg_8.3_tip_1_1  | 39  | trypsin-like serine proteinase 2                    | 386 | 1.88E-61  | 56.70% | 0.824 Y | IPR001314 (PRINTS); IPR001254 (SMART); G3DSA:2.40.10.10 (GENE3D); G3DSA:2.40.10.10 (GENE3D); IPR001254 (PFAM); G3DSA:2.40.10.10 (GENE3D); PTHR24276 (PANTHER); IPR018114 (PROSITE_PATTERNS); IPR018114 (PROSITE_PATTERNS); TRANSMEMBRANE (PHOBIUS); NON_CYTOPLASMIC_DOMAIN (PHOBIUS); CYTOPLASMIC_DOMAIN (PHOBIUS); SIGNAL_PEPTIDE_H_REGION (PHOBIUS); SIGNAL_PEPTIDE_N_REGION (PHOBIUS); SIGNAL_PEPTIDE (PHOBIUS); SIGNAL_PEPTIDE_C_REGION (PHOBIUS); IPR001254 (PROSITE_PROFILES); SignalP-noTM (SIGNALLP_EUK); IPR009003 (SUPERFAMILY); TMhelix (TMHMM) |
| 1148 | 471203_length_1159_cvg_24.0_tip_1_2 | 139 | wd repeat domain-containing protein 83              | 386 | 4.26E-100 | 78.70% | 0.139   | IPR020472 (PRINTS); IPR001680 (SMART); IPR015943 (G3DSA:2.130.10.GENE3D); IPR001680 (PFAM); PTHR22842 (PANTHER); IPR019775 (PROSITE_PATTERNS); CYTOPLASMIC_DOMAIN (PHOBIUS); TRANSMEMBRANE (PHOBIUS); TRANSMEMBRANE (PHOBIUS); CYTOPLASMIC_DOMAIN (PHOBIUS); NON_CYTOPLASMIC_DOMAIN (PHOBIUS); NON_CYTOPLASMIC_DOMAIN (PHOBIUS); TRANSMEMBRANE (PHOBIUS); IPR001680 (PROSITE_PROFILES); IPR017986 (PROSITE_PROFILES); IPR017986 (SUPERFAMILY); TMhelix (TMHMM); TMhelix (TMHMM)                                                                            |
| 1162 | 472025_length_1172_cvg_67.6_tip_1_3 | 557 | glutaminyl-peptide cyclotransferase-like            | 387 | 2.60E-116 | 68.90% | 0.645 Y | G3DSA:3.40.630.10 (GENE3D); IPR007484 (PFAM); PTHR12283 (PANTHER); NON_CYTOPLASMIC_DOMAIN (PHOBIUS); TRANSMEMBRANE (PHOBIUS); CYTOPLASMIC_DOMAIN (PHOBIUS); SignalP-noTM (SIGNALLP_EUK); SSF53187 (SUPERFAMILY)                                                                                                                                                                                                                                                                                                                                            |
| 1150 | 471555_length_1164_cvg_4.6_tip_1_0  | 33  | sphingomyelin phosphodiesterase                     | 388 | 7.06E-101 | 65.60% | 0.261   | IPR008139 (SMART); IPR011001 (G3DSA:1.10.225.GENE3D); IPR029052 (G3DSA:3.60.21.GENE3D); PTHR10340:Sf13 (PANTHER); PTHR10340 (PANTHER); NON_CYTOPLASMIC_DOMAIN (PHOBIUS); CYTOPLASMIC_DOMAIN (PHOBIUS); TRANSMEMBRANE (PHOBIUS); IPR008139 (PROSITE_PROFILES); IPR011001 (SUPERFAMILY); IPR029052 (SUPERFAMILY); TMhelix (TMHMM)                                                                                                                                                                                                                            |
| 1153 | 471609_length_1165_cvg_3.6_tip_1_2  | 16  | partial                                             | 388 | 1.29E-146 | 99.50% | 0.101   | IPR000917 (PFAM); IPR017849 (G3DSA:3.40.720.GENE3D); PTHR10342 (PANTHER); PTHR10342:Sf22 (PANTHER); IPR024607 (PROSITE_PATTERNS); IPR024607 (PROSITE_PATTERNS); IPR017850 (SUPERFAMILY)                                                                                                                                                                                                                                                                                                                                                                    |
| 1154 | 471641_length_1166_cvg_3.0_tip_1_2  | 22  | hyaluronidase precursor                             | 388 | 9.01E-83  | 59.90% | 0.108   | Coil (COILS); IPR001329 (PRINTS); IPR018155 (PRINTS); IPR013785 (G3DSA:3.20.20.GENE3D); IPR018155 (PFAM); PTHR11769:Sf8 (PANTHER); IPR018155 (PANTHER); IPR017853 (SUPERFAMILY)                                                                                                                                                                                                                                                                                                                                                                            |
| 1152 | 471607_length_1165_cvg_58.7_tip_1_0 | 516 | tropinone reductase 2-like                          | 389 | 2.77E-122 | 76.40% | 0.103   | IPR002347 (PRINTS); IPR002198 (PRINTS); IPR013968 (SMART); IPR002198 (PFAM); IPR016040 (G3DSA:3.40.50.GENE3D); PTHR24322:Sf111 (PANTHER); PTHR24322 (PANTHER); IPR020904 (PROSITE_PATTERNS); NON_CYTOPLASMIC_DOMAIN (PHOBIUS); CYTOPLASMIC_DOMAIN (PHOBIUS); TRANSMEMBRANE (PHOBIUS); SSF51735 (SUPERFAMILY)                                                                                                                                                                                                                                               |
| 1158 | 471887_length_1170_cvg_13.1_tip_1_0 | 57  | alpha-mannosidase partial                           | 390 | 3.00E-156 | 72.90% | 0.109   | G3DSA:2.70.98.30 (GENE3D); IPR011682 (PFAM); PTHR11607:Sf22 (PANTHER); PTHR11607 (PANTHER); IPR011013 (SUPERFAMILY)                                                                                                                                                                                                                                                                                                                                                                                                                                        |



|      |                                     |        |                                                                                               |     |           |        |         |                                                                                                                                                                                                                                                                                                                                                                                                                                                                                                                                                                                                                                                                                                         |
|------|-------------------------------------|--------|-----------------------------------------------------------------------------------------------|-----|-----------|--------|---------|---------------------------------------------------------------------------------------------------------------------------------------------------------------------------------------------------------------------------------------------------------------------------------------------------------------------------------------------------------------------------------------------------------------------------------------------------------------------------------------------------------------------------------------------------------------------------------------------------------------------------------------------------------------------------------------------------------|
| 1159 | 471903_length_1170_cvg_13.8_tip_1_3 | 59     | fk506-binding protein 2                                                                       | 390 | 3.52E-66  | 84.70% | 0.247   | G3DSA:3.10.50.40 (GENE3D); IPR001179 (PFAM); PTHR10516:SF134 (PANTHER); IPR023566 (PANTHER); CYTOPLASMIC_DOMAIN (PHOBIUS); NON_CYTOPLASMIC_DOMAIN (PHOBIUS); CYTOPLASMIC_DOMAIN (PHOBIUS); NON_CYTOPLASMIC_DOMAIN (PHOBIUS); TRANSMEMBRANE (PHOBIUS); CYTOPLASMIC_DOMAIN (PHOBIUS); NON_CYTOPLASMIC_DOMAIN (PHOBIUS); TRANSMEMBRANE (PHOBIUS); TRANSMEMBRANE (PHOBIUS); TRANSMEMBRANE (PHOBIUS); TRANSMEMBRANE (PHOBIUS); IPR001179 (PROSITE_PROFILES); SSF54534 (SUPERFAMILY); TMhelix (TMHMM); TMhelix (TMHMM); TMhelix (TMHMM)                                                                                                                                                                       |
| 1160 | 471913_length_1170_cvg_5.8_tip_1_1  | 32     | dipeptidyl peptidase 9                                                                        | 390 | 0         | 82.30% | 0.126   | IPR002469 (PFAM); IPR029058 (G3DSA:3.40.50.GENE3D); IPR001375 (PFAM); IPR002469 (G3DSA:2.140.10.GENE3D); PTHR11731 (PANTHER); PTHR11731:SF110 (PANTHER); IPR029058 (SUPERFAMILY); SSF82171 (SUPERFAMILY)                                                                                                                                                                                                                                                                                                                                                                                                                                                                                                |
| 1161 | 472003_length_1172_cvg_23.2_tip_1_3 | 72     | sparc                                                                                         | 391 | 1.62E-115 | 77.40% | 0.206   | Coil (COILS); Coil (COILS); IPR003645 (SMART); G3DSA:3.30.60.30 (GENE3D); IPR019577 (PFAM); IPR011992 (G3DSA:1.10.238.GENE3D); PTHR13866:SF14 (PANTHER); PTHR13866 (PANTHER); IPR001999 (PROSITE_PATTERNS); IPR018247 (PROSITE_PATTERNS); TRANSMEMBRANE (PHOBIUS); NON_CYTOPLASMIC_DOMAIN (PHOBIUS); CYTOPLASMIC_DOMAIN (PHOBIUS); SSF47473 (SUPERFAMILY); SSF100895 (SUPERFAMILY); TMhelix (TMHMM)                                                                                                                                                                                                                                                                                                     |
| 1164 | 472175_length_1174_cvg_4.6_tip_0_1  | 25     | zinc finger protein 2 homolog                                                                 | 391 | 3.69E-143 | 63.60% | 0.107   | IPR015880 (SMART); IPR013087 (G3DSA:3.30.160.GENE3D); IPR013087 (G3DSA:3.30.160.GENE3D); PF13465 (PFAM); IPR013087 (G3DSA:3.30.160.GENE3D); IPR013087 (G3DSA:3.30.160.GENE3D); IPR013087 (G3DSA:3.30.160.GENE3D); IPR007087 (PFAM); PTHR24409 (PANTHER); IPR007087 (PROSITE_PATTERNS); IPR007087 (PROSITE_PATTERNS); IPR007087 (PROSITE_PATTERNS); IPR007087 (PROSITE_PATTERNS); IPR007087 (PROSITE_PROFILES); SSF57667 (SUPERFAMILY); SSF57667 (SUPERFAMILY); SSF57667 (SUPERFAMILY) |
| 1167 | 472299_length_1176_cvg_12.0_tip_1_3 | 68     | calbindin- partial                                                                            | 392 | 1.90E-56  | 82.50% | 0.142   | IPR002048 (SMART); IPR011992 (G3DSA:1.10.238.GENE3D); IPR002048 (PFAM); IPR014710 (G3DSA:2.60.120.GENE3D); PTHR19972 (PANTHER); IPR018247 (PROSITE_PATTERNS); IPR018247 (PROSITE_PATTERNS); TRANSMEMBRANE (PHOBIUS); NON_CYTOPLASMIC_DOMAIN (PHOBIUS); CYTOPLASMIC_DOMAIN (PHOBIUS); IPR002048 (PROSITE_PROFILES); IPR002048 (PROSITE_PROFILES); SSF47473 (SUPERFAMILY); TMhelix (TMHMM)                                                                                                                                                                                                                                                                                                                |
| 1168 | 472397_length_1178_cvg_10.0_tip_1_0 | 27     | fas1_scham ame: full=fasciclin-1 ame: full=fasciclin i short=fas i short=fcn flags: precursor | 393 | 5.52E-104 | 63.60% | 0.105   | IPR000782 (SMART); IPR000782 (G3DSA:2.30.180.GENE3D); IPR000782 (PFAM); PTHR10900 (PANTHER); PTHR10900:SF73 (PANTHER); IPR000782 (PROSITE_PROFILES); IPR000782 (PROSITE_PROFILES); IPR000782 (SUPERFAMILY); IPR000782 (SUPERFAMILY)                                                                                                                                                                                                                                                                                                                                                                                                                                                                     |
| 1169 | 472399_length_1178_cvg_63.8_tip_1_0 | 750127 | serine protease 27-like                                                                       | 393 | 4.81E-42  | 55.00% | 0.484 Y | IPR001314 (PRINTS); IPR001254 (SMART); IPR001254 (PFAM); G3DSA:2.40.10.10 (GENE3D); G3DSA:2.40.10.10 (GENE3D); PTHR24268 (PANTHER); IPR018114 (PROSITE_PATTERNS); IPR018114 (PROSITE_PATTERNS); NON_CYTOPLASMIC_DOMAIN (PHOBIUS); SIGNAL_PEPTIDE_C_REGION (PHOBIUS); SIGNAL_PEPTIDE (PHOBIUS); SIGNAL_PEPTIDE_H_REGION (PHOBIUS); SIGNAL_PEPTIDE_N_REGION (PHOBIUS); IPR001254 (PROSITE_PROFILES); SignalP-noTM (SIGNALP_EUK); IPR009003 (SUPERFAMILY)                                                                                                                                                                                                                                                  |
| 1170 | 472427_length_1179_cvg_50.4_tip_1_4 | 321    | meprin a subunit beta                                                                         | 393 | 3.44E-51  | 58.50% | 0.196   | IPR001506 (PRINTS); IPR006026 (SMART); IPR001506 (PFAM); IPR024079 (G3DSA:3.40.390.GENE3D); PTHR10127 (PANTHER); SSF55486 (SUPERFAMILY); TMhelix (TMHMM); TMhelix (TMHMM)                                                                                                                                                                                                                                                                                                                                                                                                                                                                                                                               |
| 1171 | 472541_length_1181_cvg_3.0_tip_1_2  | 18     | plasma alpha-l-fucosidase                                                                     | 393 | 7.44E-63  | 81.40% | 0.768 Y | IPR016286 (PRINTS); IPR000933 (SMART); IPR000933 (PFAM); IPR013781 (G3DSA:3.20.20.GENE3D); IPR000933 (PANTHER); PTHR10030:SF26 (PANTHER); TRANSMEMBRANE (PHOBIUS); CYTOPLASMIC_DOMAIN (PHOBIUS); SIGNAL_PEPTIDE_C_REGION (PHOBIUS); NON_CYTOPLASMIC_DOMAIN (PHOBIUS); SIGNAL_PEPTIDE_N_REGION (PHOBIUS); SIGNAL_PEPTIDE (PHOBIUS); SIGNAL_PEPTIDE_H_REGION (PHOBIUS); SignalP-TM (SIGNALP_EUK); IPR017853 (SUPERFAMILY)                                                                                                                                                                                                                                                                                 |



|      |                                     |       |                                                                              |     |           |        |         |                                                                                                                                                                                                                                                                                                                                                                                                                                                                                                                                                                  |
|------|-------------------------------------|-------|------------------------------------------------------------------------------|-----|-----------|--------|---------|------------------------------------------------------------------------------------------------------------------------------------------------------------------------------------------------------------------------------------------------------------------------------------------------------------------------------------------------------------------------------------------------------------------------------------------------------------------------------------------------------------------------------------------------------------------|
| 1180 | 473371_length_1195_cvg_14.7_tip_1_5 | 79    | low quality protein: agrin                                                   | 398 | 8.47E-40  | 52.10% | 0.400 Y | IPR002350 (SMART); G3DSA:2.40.50.120 (GENE3D); IPR004850 (PFAM); IPR002350 (PFAM); G3DSA:3.30.60.30 (GENE3D); PTHR10913 (PANTHER); PTHR10913:SF45 (PANTHER); IPR002350 (PROSITE_PROFILES); IPR004850 (PROSITE_PROFILES); SSF100895 (SUPERFAMILY); IPR008993 (SUPERFAMILY); TMhelix (TMHMM)                                                                                                                                                                                                                                                                       |
| 1181 | 473465_length_1197_cvg_8.2_tip_1_5  | 53    | endonuclease mitochondrial                                                   | 399 | 9.97E-127 | 84.00% | 0.156   | IPR020821 (SMART); IPR001604 (SMART); IPR020821 (G3DSA:3.40.570.GENE3D); IPR001604 (PFAM); PTHR13966 (PANTHER); IPR018524 (PROSITE_PATTERNS); SSF54060 (SUPERFAMILY)                                                                                                                                                                                                                                                                                                                                                                                             |
| 1182 | 473507_length_1198_cvg_57.2_tip_1_3 | 584   | neuferricin -like protein                                                    | 400 | 3.09E-81  | 67.30% | 0.326   | IPR001199 (PFAM); IPR001199 (G3DSA:3.10.120.GENE3D); PTHR10281:SF4 (PANTHER); PTHR10281 (PANTHER); NON_CYTOPLASMIC_DOMAIN (PHOBIUS); TRANSMEMBRANE (PHOBIUS); CYTOPLASMIC_DOMAIN (PHOBIUS); NON_CYTOPLASMIC_DOMAIN (PHOBIUS); TRANSMEMBRANE (PHOBIUS); IPR001199 (SUPERFAMILY)                                                                                                                                                                                                                                                                                   |
| 1183 | 473565_length_1199_cvg_5.7_tip_1_3  | 24    | alpha- -mannosyl-glycoprotein 4-beta-n-acetylglucosaminyltransferase partial | 400 | 6.77E-41  | 55.30% | 0.164   | IPR006759 (PFAM); PTHR12062:SF5 (PANTHER); IPR006759 (PANTHER); CYTOPLASMIC_DOMAIN (PHOBIUS); TRANSMEMBRANE (PHOBIUS); NON_CYTOPLASMIC_DOMAIN (PHOBIUS); NON_CYTOPLASMIC_DOMAIN (PHOBIUS); TRANSMEMBRANE (PHOBIUS); TMhelix (TMHMM)                                                                                                                                                                                                                                                                                                                              |
| 1184 | 473571_length_1199_cvg_63.0_tip_1_0 | 15319 | calreticulin                                                                 | 400 | 0         | 83.70% | 0.323   | Coil (COILS); IPR001580 (PRINTS); IPR009169 (PIRSF); IPR013320 (G3DSA:2.60.120.GENE3D); IPR001580 (PFAM); PTHR11073:SF8 (PANTHER); IPR001580 (PANTHER); IPR018124 (PROSITE_PATTERNS); IPR018124 (PROSITE_PATTERNS); IPR018124 (PROSITE_PATTERNS); IPR018124 (PROSITE_PATTERNS); NON_CYTOPLASMIC_DOMAIN (PHOBIUS); TRANSMEMBRANE (PHOBIUS); CYTOPLASMIC_DOMAIN (PHOBIUS); IPR009033 (SUPERFAMILY); IPR013320 (SUPERFAMILY); TMhelix (TMHMM)                                                                                                                       |
| 1185 | 473741_length_1202_cvg_3.1_tip_1_5  | 19    | early growth response                                                        | 400 | 4.58E-83  | 70.40% | 0.099   | IPR015880 (SMART); IPR013087 (G3DSA:3.30.160.GENE3D); PF13465 (PFAM); IPR013087 (G3DSA:3.30.160.GENE3D); PTHR23223:SF80 (PANTHER); PTHR23223 (PANTHER); IPR007087 (PROSITE_PATTERNS); IPR007087 (PROSITE_PATTERNS); IPR007087 (PROSITE_PROFILES); IPR007087 (PROSITE_PROFILES); IPR007087 (PROSITE_PROFILES); SSF57667 (SUPERFAMILY); SSF57667 (SUPERFAMILY)                                                                                                                                                                                                     |
| 1186 | 473803_length_1203_cvg_85.9_tip_1_0 | 98515 | transmembrane protease serine 4                                              | 401 | 1.78E-41  | 52.40% | 0.496 Y | IPR001314 (PRINTS); IPR001254 (SMART); G3DSA:2.40.10.10 (GENE3D); G3DSA:2.40.10.10 (GENE3D); IPR001254 (PFAM); G3DSA:2.40.10.10 (GENE3D); PTHR24260 (PANTHER); IPR018114 (PROSITE_PATTERNS); IPR018114 (PROSITE_PATTERNS); SIGNAL_PEPTIDE_H_REGION (PHOBIUS); SIGNAL_PEPTIDE_N_REGION (PHOBIUS); SIGNAL_PEPTIDE (PHOBIUS); NON_CYTOPLASMIC_DOMAIN (PHOBIUS); SIGNAL_PEPTIDE_C_REGION (PHOBIUS); IPR001254 (PROSITE_PROFILES); IPR009003 (SUPERFAMILY)                                                                                                            |
| 1187 | 473853_length_1205_cvg_4.7_tip_1_2  | 27    | melanopsin-like isoform x1                                                   | 401 | 1.04E-74  | 60.00% | 0.106   | IPR000276 (PRINTS); IPR000276 (PFAM); G3DSA:1.20.1070.10 (GENE3D); PTHR24242:SF154 (PANTHER); PTHR24242 (PANTHER); TRANSMEMBRANE (PHOBIUS); NON_CYTOPLASMIC_DOMAIN (PHOBIUS); NON_CYTOPLASMIC_DOMAIN (PHOBIUS); TRANSMEMBRANE (PHOBIUS); NON_CYTOPLASMIC_DOMAIN (PHOBIUS); TRANSMEMBRANE (PHOBIUS); TRANSMEMBRANE (PHOBIUS); CYTOPLASMIC_DOMAIN (PHOBIUS); CYTOPLASMIC_DOMAIN (PHOBIUS); CYTOPLASMIC_DOMAIN (PHOBIUS); IPR017452 (PROSITE_PROFILES); SSF81321 (SUPERFAMILY); TMhelix (TMHMM); TMhelix (TMHMM); TMhelix (TMHMM); TMhelix (TMHMM); TMhelix (TMHMM) |
| 1188 | 473919_length_1206_cvg_6.4_tip_1_0  | 32    | nardilysin-like isoform x2                                                   | 402 | 5.11E-98  | 66.10% | 0.15    | IPR011237 (G3DSA:3.30.830.GENE3D); IPR007863 (PFAM); IPR011237 (G3DSA:3.30.830.GENE3D); PTHR11851 (PANTHER); PTHR11851:SF108 (PANTHER); IPR011249 (SUPERFAMILY); IPR011249 (SUPERFAMILY)                                                                                                                                                                                                                                                                                                                                                                         |
| 1189 | 473961_length_1206_cvg_6.6_tip_1_1  | 49    | endoplasmic reticulum resident protein 44 isoform x2                         | 402 | 0         | 81.40% | 0.154   | IPR012336 (G3DSA:3.40.30.GENE3D); IPR013766 (PFAM); IPR012336 (G3DSA:3.40.30.GENE3D); PF13848 (PFAM); PTHR18929 (PANTHER); PTHR18929:SF49 (PANTHER); IPR012336 (PROSITE_PROFILES); IPR012336 (SUPERFAMILY); IPR012336 (SUPERFAMILY); IPR012336 (SUPERFAMILY)                                                                                                                                                                                                                                                                                                     |
| 1190 | 473987_length_1207_cvg_7.3_tip_1_4  | 38    | transcription termination factor rho                                         | 402 | 3.22E-09  | 62.90% | 0.108   | TRANSMEMBRANE (PHOBIUS); CYTOPLASMIC_DOMAIN (PHOBIUS); TRANSMEMBRANE (PHOBIUS); NON_CYTOPLASMIC_DOMAIN (PHOBIUS); CYTOPLASMIC_DOMAIN (PHOBIUS)                                                                                                                                                                                                                                                                                                                                                                                                                   |

|      |                                     |        |                                                                               |     |           |        |       |                                                                                                                                                                                                                                                                                                                                                                                                                                                                                                                                                                                                                                                                             |
|------|-------------------------------------|--------|-------------------------------------------------------------------------------|-----|-----------|--------|-------|-----------------------------------------------------------------------------------------------------------------------------------------------------------------------------------------------------------------------------------------------------------------------------------------------------------------------------------------------------------------------------------------------------------------------------------------------------------------------------------------------------------------------------------------------------------------------------------------------------------------------------------------------------------------------------|
| 1214 | 475455_length_1236_cvg_8.2_tip_1_4  | 49     | ras-related protein rab-4b                                                    | 403 | 5.25E-135 | 94.30% | 0.236 | IPR001806 (PRINTS); IPR003579 (SMART); IPR024156 (SMART); IPR003578 (SMART); IPR020849 (SMART); IPR002041 (SMART); IPR001806 (PFAM); IPR027417 (G3DSA:3.40.50.GENE3D); IPR005225 (TIGRFAM); PTHR24073 (PANTHER); PTHR24073:SF387 (PANTHER); TRANSMEMBRANE (PHOBIUS); CYTOPLASMIC_DOMAIN (PHOBIUS); TRANSMEMBRANE (PHOBIUS); NON_CYTOPLASMIC_DOMAIN (PHOBIUS); NON_CYTOPLASMIC_DOMAIN (PHOBIUS); CYTOPLASMIC_DOMAIN (PHOBIUS); TRANSMEMBRANE (PHOBIUS); PS51419 (PROSITE_PROFILES); IPR027417 (SUPERFAMILY); TMhelix (TMHMM)                                                                                                                                                 |
| 1191 | 474127_length_1210_cvg_90.4_tip_1_0 | 414780 | suppressor of tumorigenicity 14 protein homolog                               | 404 | 4.56E-43  | 50.50% | 0.316 | IPR001314 (PRINTS); IPR002172 (SMART); IPR001254 (SMART); G3DSA:2.40.10.10 (GENE3D); G3DSA:2.40.10.10 (GENE3D); IPR002172 (PFAM); IPR002172 (G3DSA:4.10.400.GENE3D); IPR001254 (PFAM); G3DSA:2.40.10.10 (GENE3D); PTHR24256 (PANTHER); IPR018114 (PROSITE_PATTERNS); IPR023415 (PROSITE_PATTERNS); NON_CYTOPLASMIC_DOMAIN (PHOBIUS); CYTOPLASMIC_DOMAIN (PHOBIUS); TRANSMEMBRANE (PHOBIUS); IPR001254 (PROSITE_PROFILES); IPR002172 (PROSITE_PROFILES); IPR009003 (SUPERFAMILY); IPR002172 (SUPERFAMILY)                                                                                                                                                                    |
| 1193 | 474273_length_1212_cvg_15.5_tip_1_4 | 61     | 39s ribosomal protein mitochondrial                                           | 404 | 2.93E-101 | 70.30% | 0.312 | IPR008914 (G3DSA:3.90.280.GENE3D); IPR008914 (PFAM); PTHR11362:SF16 (PANTHER); PTHR11362 (PANTHER); IPR008914 (SUPERFAMILY)                                                                                                                                                                                                                                                                                                                                                                                                                                                                                                                                                 |
| 1207 | 475245_length_1231_cvg_16.6_tip_1_3 | 70     | dehydrogenase reductase sdr family member 7                                   | 404 | 7.23E-109 | 67.50% | 0.141 | IPR002347 (PRINTS); IPR002198 (PRINTS); IPR002198 (PFAM); IPR016040 (G3DSA:3.40.50.GENE3D); PTHR24322:SF31 (PANTHER); PTHR24322 (PANTHER); TRANSMEMBRANE (PHOBIUS); CYTOPLASMIC_DOMAIN (PHOBIUS); CYTOPLASMIC_DOMAIN (PHOBIUS); NON_CYTOPLASMIC_DOMAIN (PHOBIUS); TRANSMEMBRANE (PHOBIUS); SSF51735 (SUPERFAMILY); TMhelix (TMHMM); TMhelix (TMHMM)                                                                                                                                                                                                                                                                                                                         |
| 1195 | 474493_length_1217_cvg_3.4_tip_1_2  | 29     | krueppel-like factor 13                                                       | 405 | 1.46E-50  | 84.30% | 0.247 | IPR015880 (SMART); IPR013087 (G3DSA:3.30.160.GENE3D); PF13465 (PFAM); IPR013087 (G3DSA:3.30.160.GENE3D); PTHR23223 (PANTHER); IPR007087 (PROSITE_PATTERNS); IPR007087 (PROSITE_PATTERNS); CYTOPLASMIC_DOMAIN (PHOBIUS); TRANSMEMBRANE (PHOBIUS); NON_CYTOPLASMIC_DOMAIN (PHOBIUS); IPR007087 (PROSITE_PROFILES); IPR007087 (PROSITE_PROFILES); SSF57667 (SUPERFAMILY)                                                                                                                                                                                                                                                                                                       |
| 1200 | 474927_length_1225_cvg_62.8_tip_1_1 | 1386   | glutaredoxin- partial                                                         | 405 | 3.20E-143 | 78.20% | 0.238 | IPR012336 (G3DSA:3.40.30.GENE3D); IPR013766 (PFAM); IPR002109 (PFAM); IPR012336 (G3DSA:3.40.30.GENE3D); IPR004480 (TIGRFAM); PTHR10293:SF40 (PANTHER); IPR004480 (PANTHER); IPR002109 (PROSITE_PROFILES); IPR002109 (PROSITE_PROFILES); IPR012336 (PROSITE_PROFILES); IPR012336 (SUPERFAMILY); IPR012336 (SUPERFAMILY); IPR012336 (SUPERFAMILY)                                                                                                                                                                                                                                                                                                                             |
| 1196 | 474739_length_1222_cvg_3.4_tip_1_1  | 18     | zinc finger protein 239-like                                                  | 407 | 2.55E-29  | 47.40% | 0.109 | IPR015880 (SMART); IPR007087 (PFAM); IPR013087 (G3DSA:3.30.160.GENE3D); PF13465 (PFAM); IPR013087 (G3DSA:3.30.160.GENE3D); PF13894 (PFAM); IPR013087 (G3DSA:3.30.160.GENE3D); PTHR24409:SF14 (PANTHER); PTHR24409 (PANTHER); IPR007087 (PROSITE_PATTERNS); IPR007087 (PROSITE_PATTERNS); IPR007087 (PROSITE_PATTERNS); IPR007087 (PROSITE_PATTERNS); IPR007087 (PROSITE_PATTERNS); IPR007087 (PROSITE_PATTERNS); IPR007087 (PROSITE_PROFILES); IPR007087 (PROSITE_PROFILES); IPR007087 (PROSITE_PROFILES); IPR007087 (PROSITE_PROFILES); IPR007087 (PROSITE_PROFILES); IPR007087 (PROSITE_PROFILES); SSF57667 (SUPERFAMILY); SSF57667 (SUPERFAMILY); SSF57667 (SUPERFAMILY) |
| 1197 | 474779_length_1223_cvg_12.2_tip_1_5 | 55     | uv radiation resistance-associated gene protein                               | 407 | 9.09E-40  | 66.40% | 0.097 | Coil (COILS); PTHR15157 (PANTHER)                                                                                                                                                                                                                                                                                                                                                                                                                                                                                                                                                                                                                                           |
| 1198 | 474875_length_1224_cvg_4.7_tip_1_0  | 30     | von willebrand factor type egf and pentraxin domain-containing protein 1-like | 408 | 4.39E-13  | 46.40% | 0.101 | IPR000436 (SMART); G3DSA:2.10.70.10 (GENE3D); IPR000436 (PFAM); G3DSA:2.10.70.10 (GENE3D); G3DSA:2.10.70.10 (GENE3D); G3DSA:2.10.70.10 (GENE3D); PTHR19325 (PANTHER); IPR000436 (PROSITE_PROFILES); IPR000436 (PROSITE_PROFILES); IPR000436 (SUPERFAMILY); IPR000436 (SUPERFAMILY); IPR000436 (SUPERFAMILY)                                                                                                                                                                                                                                                                                                                                                                 |
| 1199 | 474897_length_1225_cvg_54.7_tip_1_1 | 591    | histone 1o                                                                    | 408 | 2.21E-29  | 71.80% | 0.119 | IPR005819 (PRINTS); IPR005818 (SMART); IPR005818 (PFAM); IPR011991 (G3DSA:1.10.10.GENE3D); PTHR11467 (PANTHER); IPR005818 (PROSITE_PROFILES); SSF46785 (SUPERFAMILY)                                                                                                                                                                                                                                                                                                                                                                                                                                                                                                        |
| 1201 | 474959_length_1226_cvg_3.4_tip_1_4  | 18     | dnaj homolog subfamily b member 9                                             | 409 | 1.42E-61  | 56.10% | 0.186 | Coil (COILS); IPR001623 (PRINTS); IPR001623 (SMART); IPR001623 (G3DSA:1.10.287.GENE3D); IPR001623 (PFAM); PTHR24077 (PANTHER); IPR018253 (PROSITE_PATTERNS); IPR001623 (PROSITE_PROFILES); IPR001623 (SUPERFAMILY)                                                                                                                                                                                                                                                                                                                                                                                                                                                          |

|      |                                     |      |                                                                                                                                                                            |     |           |        |       |                                                                                                                                                                                                                                                                                                                                                                                                                                                                                                                                                                                                                                                                               |
|------|-------------------------------------|------|----------------------------------------------------------------------------------------------------------------------------------------------------------------------------|-----|-----------|--------|-------|-------------------------------------------------------------------------------------------------------------------------------------------------------------------------------------------------------------------------------------------------------------------------------------------------------------------------------------------------------------------------------------------------------------------------------------------------------------------------------------------------------------------------------------------------------------------------------------------------------------------------------------------------------------------------------|
| 1202 | 475091_length_1228_cvg_6.8_tip_0_4  | 39   | coagulation factor xi                                                                                                                                                      | 409 | 1.68E-64  | 61.90% | 0.124 | IPR001314 (PRINTS); IPR001254 (SMART); G3DSA:2.40.10.10 (GENE3D); G3DSA:2.40.10.10 (GENE3D); IPR001254 (PFAM); G3DSA:2.40.10.10 (GENE3D); PTHR24256 (PANTHER); IPR018114 (PROSITE_PATTERNS); IPR018114 (PROSITE_PATTERNS); IPR001254 (PROSITE_PROFILES); IPR009003 (SUPERFAMILY)                                                                                                                                                                                                                                                                                                                                                                                              |
| 1203 | 475119_length_1229_cvg_18.4_tip_1_1 | 94   | ankyrin repeat family a protein 2                                                                                                                                          | 410 | 8.32E-73  | 67.70% | 0.204 | IPR002110 (SMART); IPR020683 (PFAM); IPR020683 (G3DSA:1.25.40.GENE3D); IPR002110 (PFAM); PTHR24124 (PANTHER); IPR002110 (PROSITE_PROFILES); IPR002110 (PROSITE_PROFILES); IPR020683 (PROSITE_PROFILES); IPR002110 (PROSITE_PROFILES); IPR020683 (SUPERFAMILY)                                                                                                                                                                                                                                                                                                                                                                                                                 |
| 1204 | 475165_length_1230_cvg_4.4_tip_1_2  | 32   | fukutin-related partial                                                                                                                                                    | 410 | 1.20E-26  | 72.00% | 0.286 | IPR007074 (PFAM); PTHR13627 (PANTHER); PTHR13627:SF25 (PANTHER); CYTOPLASMIC_DOMAIN (PHOBIUS); TRANSMEMBRANE (PHOBIUS); CYTOPLASMIC_DOMAIN (PHOBIUS); NON_CYTOPLASMIC_DOMAIN (PHOBIUS); TRANSMEMBRANE (PHOBIUS); NON_CYTOPLASMIC_DOMAIN (PHOBIUS); TRANSMEMBRANE (PHOBIUS); TMhelix (TMHMM); TMhelix (TMHMM); TMhelix (TMHMM)                                                                                                                                                                                                                                                                                                                                                 |
| 1205 | 475171_length_1230_cvg_12.1_tip_1_5 | 66   | zinc finger protein 271 (zinc finger protein 7) (zinc finger protein znfphe133) (epstein-barr virus-induced zinc finger protein) (znf-eb) (ct-zfp48) (zinc finger protein) | 410 | 1.02E-37  | 54.20% | 0.131 | IPR015880 (SMART); PF13894 (PFAM); IPR013087 (G3DSA:3.30.160.GENE3D); PF13465 (PFAM); IPR013087 (G3DSA:3.30.160.GENE3D); PTHR24375 (PANTHER); PTHR24375:SF106 (PANTHER); IPR007087 (PROSITE_PATTERNS); IPR007087 (PROSITE_PATTERNS); IPR007087 (PROSITE_PATTERNS); IPR007087 (PROSITE_PATTERNS); IPR007087 (PROSITE_PATTERNS); IPR007087 (PROSITE_PATTERNS); IPR007087 (PROSITE_PROFILES); SSF57667 (SUPERFAMILY); SSF57667 (SUPERFAMILY); SSF57667 (SUPERFAMILY); SSF57667 (SUPERFAMILY) |
| 1206 | 475175_length_1230_cvg_65.9_tip_1_3 | 1197 | hemagglutinin                                                                                                                                                              | 410 | 6.36E-93  | 67.80% | 0.114 | IPR023612 (PRINTS); G3DSA:1.10.390.10 (GENE3D); IPR013856 (PFAM); IPR013856 (G3DSA:3.10.170.GENE3D); IPR001570 (PFAM); IPR007280 (PFAM); CYTOPLASMIC_DOMAIN (PHOBIUS); NON_CYTOPLASMIC_DOMAIN (PHOBIUS); TRANSMEMBRANE (PHOBIUS); TRANSMEMBRANE (PHOBIUS); NON_CYTOPLASMIC_DOMAIN (PHOBIUS); SSF55486 (SUPERFAMILY); TMhelix (TMHMM); TMhelix (TMHMM)                                                                                                                                                                                                                                                                                                                         |
| 1222 | 475901_length_1245_cvg_19.6_tip_1_2 | 117  | ankyrin repeat domain-containing protein 16-like                                                                                                                           | 410 | 2.31E-112 | 63.60% | 0.104 | IPR002110 (PRINTS); IPR002110 (SMART); IPR020683 (G3DSA:1.25.40.GENE3D); IPR020683 (PFAM); PTHR24181:SF20 (PANTHER); PTHR24181 (PANTHER); IPR020683 (PROSITE_PROFILES); IPR002110 (PROSITE_PROFILES); IPR002110 (PROSITE_PROFILES); IPR002110 (PROSITE_PROFILES); IPR002110 (PROSITE_PROFILES); IPR002110 (PROSITE_PROFILES); IPR020683 (SUPERFAMILY)                                                                                                                                                                                                                                                                                                                         |
| 1209 | 475349_length_1233_cvg_35.6_tip_1_4 | 154  | ligand of numb protein x 2                                                                                                                                                 | 411 | 2.40E-55  | 69.10% | 0.166 | IPR001478 (SMART); IPR001478 (PFAM); IPR001478 (G3DSA:2.30.42.GENE3D); PTHR19964 (PANTHER); TRANSMEMBRANE (PHOBIUS); NON_CYTOPLASMIC_DOMAIN (PHOBIUS); TRANSMEMBRANE (PHOBIUS); CYTOPLASMIC_DOMAIN (PHOBIUS); NON_CYTOPLASMIC_DOMAIN (PHOBIUS); IPR001478 (PROSITE_PROFILES); IPR001478 (SUPERFAMILY); TMhelix (TMHMM); TMhelix (TMHMM)                                                                                                                                                                                                                                                                                                                                       |







|      |                                     |      |                                                                                                                                                                            |     |           |        |         |                                                                                                                                                                                                                                                                                                                                                                                                                                                                                                                                                                                                                                                                                                                                                                                                                            |
|------|-------------------------------------|------|----------------------------------------------------------------------------------------------------------------------------------------------------------------------------|-----|-----------|--------|---------|----------------------------------------------------------------------------------------------------------------------------------------------------------------------------------------------------------------------------------------------------------------------------------------------------------------------------------------------------------------------------------------------------------------------------------------------------------------------------------------------------------------------------------------------------------------------------------------------------------------------------------------------------------------------------------------------------------------------------------------------------------------------------------------------------------------------------|
| 1238 | 477460_length_1278_cvg_91.2_tip_1_1 | 6691 | transmembrane protease serine 6 isoform x2                                                                                                                                 | 418 | 1.57E-40  | 53.40% | 0.155   | IPR001314 (PRINTS); IPR001254 (SMART); G3DSA:2.40.10.10 (GENE3D); G3DSA:2.40.10.10 (GENE3D); G3DSA:2.40.10.10 (GENE3D); IPR001254 (PFAM); PTHR24268 (PANTHER); IPR018114 (PROSITE_PATTERNS); IPR018114 (PROSITE_PATTERNS); NON_CYTOPLASMIC_DOMAIN (PHOBIUS); TRANSMEMBRANE (PHOBIUS); CYTOPLASMIC_DOMAIN (PHOBIUS); IPR001254 (PROSITE_PROFILES); IPR009003 (SUPERFAMILY)                                                                                                                                                                                                                                                                                                                                                                                                                                                  |
| 1231 | 476467_length_1256_cvg_8.8_tip_1_0  | 40   | hemocytin                                                                                                                                                                  | 419 | 3.55E-38  | 46.60% | 0.102   | IPR001846 (PFAM); IPR014853 (PFAM); IPR001846 (PROSITE_PROFILES); IPR002919 (SUPERFAMILY)                                                                                                                                                                                                                                                                                                                                                                                                                                                                                                                                                                                                                                                                                                                                  |
| 1232 | 476524_length_1258_cvg_6.5_tip_1_3  | 47   | phosphatidylinositol -trisphosphate 3-phosphatase and dual-specificity protein phosphatase pten isoform x4                                                                 | 420 | 8.25E-123 | 70.90% | 0.118   | IPR003595 (SMART); G3DSA:2.60.40.1110 (GENE3D); IPR000340 (PFAM); IPR029021 (G3DSA:3.90.190.GENE3D); IPR014020 (PFAM); PTHR12305 (PANTHER); IPR016130 (PROSITE_PATTERNS); TRANSMEMBRANE (PHOBIUS); NON_CYTOPLASMIC_DOMAIN (PHOBIUS); CYTOPLASMIC_DOMAIN (PHOBIUS); IPR029023 (PROSITE_PROFILES); IPR014020 (PROSITE_PROFILES); IPR000008 (SUPERFAMILY); IPR029021 (SUPERFAMILY); TMhelix (TMHMM)                                                                                                                                                                                                                                                                                                                                                                                                                           |
| 1233 | 476786_length_1263_cvg_16.3_tip_1_4 | 81   | zinc finger protein 300-like isoform x1                                                                                                                                    | 421 | 1.65E-18  | 60.60% | 0.13    | IPR015880 (SMART); IPR013087 (G3DSA:3.30.160.GENE3D); PF13465 (PFAM); IPR013087 (G3DSA:3.30.160.GENE3D); IPR007087 (PFAM); PTHR24409 (PANTHER); PTHR24409:SF14 (PANTHER); IPR007087 (PROSITE_PATTERNS); IPR007087 (PROSITE_PATTERNS); IPR007087 (PROSITE_PATTERNS); IPR026590 (PROSITE_PROFILES); IPR007087 (PROSITE_PROFILES); IPR007087 (PROSITE_PROFILES); IPR007087 (PROSITE_PROFILES); SSF57667 (SUPERFAMILY); SSF57667 (SUPERFAMILY)                                                                                                                                                                                                                                                                                                                                                                                 |
| 1242 | 477978_length_1290_cvg_12.6_tip_1_0 | 87   | adenosine deaminase-like protein                                                                                                                                           | 422 | 1.49E-108 | 69.70% | 0.097   | G3DSA:3.20.20.140 (GENE3D); IPR001365 (PFAM); PTHR11409:SF21 (PANTHER); PTHR11409 (PANTHER); SSF51556 (SUPERFAMILY)                                                                                                                                                                                                                                                                                                                                                                                                                                                                                                                                                                                                                                                                                                        |
| 1234 | 477142_length_1271_cvg_12.3_tip_1_4 | 64   | p38 mitogen-activated protein kinase                                                                                                                                       | 424 | 1.09E-127 | 90.00% | 0.108   | Coil (COILS); IPR008352 (PRINTS); IPR002290 (SMART); IPR000719 (PFAM); G3DSA:1.10.510.10 (GENE3D); PTHR24055:SF110 (PANTHER); PTHR24055 (PANTHER); NON_CYTOPLASMIC_DOMAIN (PHOBIUS); TRANSMEMBRANE (PHOBIUS); CYTOPLASMIC_DOMAIN (PHOBIUS); IPR000719 (PROSITE_PROFILES); IPR011009 (SUPERFAMILY)                                                                                                                                                                                                                                                                                                                                                                                                                                                                                                                          |
| 1235 | 477200_length_1272_cvg_3.1_tip_1_1  | 23   | prolyl 3-hydroxylase 2-like isoform x1                                                                                                                                     | 424 | 3.30E-105 | 68.90% | 0.103   | Coil (COILS); IPR006620 (SMART); IPR005123 (PFAM); PTHR14049 (PANTHER); PTHR14049:SF9 (PANTHER); IPR005123 (PROSITE_PROFILES)                                                                                                                                                                                                                                                                                                                                                                                                                                                                                                                                                                                                                                                                                              |
| 1236 | 477370_length_1276_cvg_5.7_tip_1_3  | 24   | agap000560-pa-like protein                                                                                                                                                 | 426 | 0         | 74.50% | 0.13    | IPR003593 (SMART); IPR027417 (G3DSA:3.40.50.GENE3D); IPR003959 (PFAM); PTHR23076:SF47 (PANTHER); PTHR23076 (PANTHER); CYTOPLASMIC_DOMAIN (PHOBIUS); TRANSMEMBRANE (PHOBIUS); NON_CYTOPLASMIC_DOMAIN (PHOBIUS); CYTOPLASMIC_DOMAIN (PHOBIUS); TRANSMEMBRANE (PHOBIUS); IPR027417 (SUPERFAMILY); TMhelix (TMHMM)                                                                                                                                                                                                                                                                                                                                                                                                                                                                                                             |
| 1237 | 477392_length_1277_cvg_2.3_tip_1_4  | 18   | -like protein subfamily c member 11                                                                                                                                        | 426 | 0         | 81.50% | 0.102   | IPR001623 (PRINTS); IPR001623 (SMART); IPR001623 (G3DSA:1.10.287.GENE3D); IPR001623 (PFAM); PTHR24078:SF159 (PANTHER); PTHR24078 (PANTHER); IPR001623 (PROSITE_PROFILES); IPR001623 (SUPERFAMILY)                                                                                                                                                                                                                                                                                                                                                                                                                                                                                                                                                                                                                          |
| 1239 | 477520_length_1279_cvg_2.0_tip_1_2  | 13   | zinc finger protein 271 (zinc finger protein 7) (zinc finger protein znfphe133) (epstein-barr virus-induced zinc finger protein) (znf-eb) (ct-zfp48) (zinc finger protein) | 426 | 3.97E-41  | 54.70% | 0.101   | IPR015880 (SMART); IPR013087 (G3DSA:3.30.160.GENE3D); IPR007087 (PFAM); IPR013087 (G3DSA:3.30.160.GENE3D); PF13465 (PFAM); PF13894 (PFAM); IPR013087 (G3DSA:3.30.160.GENE3D); PTHR24409:SF14 (PANTHER); PTHR24409 (PANTHER); IPR007087 (PROSITE_PATTERNS); IPR007087 (PROSITE_PATTERNS); IPR007087 (PROSITE_PATTERNS); IPR007087 (PROSITE_PATTERNS); IPR007087 (PROSITE_PATTERNS); CYTOPLASMIC_DOMAIN (PHOBIUS); TRANSMEMBRANE (PHOBIUS); NON_CYTOPLASMIC_DOMAIN (PHOBIUS); IPR007087 (PROSITE_PROFILES); SSF57667 (SUPERFAMILY); SSF57667 (SUPERFAMILY); SSF57667 (SUPERFAMILY); SSF57667 (SUPERFAMILY) |
| 1240 | 477702_length_1284_cvg_4.6_tip_1_4  | 22   | neuroglian-like isoform 2                                                                                                                                                  | 428 | 0         | 80.00% | 0.108   | IPR003598 (SMART); IPR003599 (SMART); IPR003961 (SMART); IPR013783 (G3DSA:2.60.40.GENE3D); IPR003961 (PFAM); IPR013098 (PFAM); IPR013783 (G3DSA:2.60.40.GENE3D); IPR013783 (G3DSA:2.60.40.GENE3D); IPR013783 (G3DSA:2.60.40.GENE3D); PTHR10489:SF553 (PANTHER); PTHR10489 (PANTHER); IPR003961 (PROSITE_PROFILES); IPR003961 (PROSITE_PROFILES); IPR007110 (PROSITE_PROFILES); IPR007110 (PROSITE_PROFILES); IPR003961 (SUPERFAMILY); SSF48726 (SUPERFAMILY); SSF48726 (SUPERFAMILY)                                                                                                                                                                                                                                                                                                                                       |
| 1254 | 478894_length_1312_cvg_35.7_tip_1_0 | 196  | gamma-glutamyl hydrolase                                                                                                                                                   | 428 | 7.53E-100 | 65.80% | 0.546 Y | IPR011697 (PFAM); IPR029062 (G3DSA:3.40.50.GENE3D); IPR015527 (PANTHER); IPR015527 (PROSITE_PROFILES); SignalP-noTM (SIGNALP_EUK); IPR029062 (SUPERFAMILY); TMhelix (TMHMM); TMhelix (TMHMM); TMhelix (TMHMM)                                                                                                                                                                                                                                                                                                                                                                                                                                                                                                                                                                                                              |



|      |                                     |      |                                                                                                                      |     |           |        |       |                                                                                                                                                                                                                                                                                                                                                                                                                                                                                                                                                                                    |
|------|-------------------------------------|------|----------------------------------------------------------------------------------------------------------------------|-----|-----------|--------|-------|------------------------------------------------------------------------------------------------------------------------------------------------------------------------------------------------------------------------------------------------------------------------------------------------------------------------------------------------------------------------------------------------------------------------------------------------------------------------------------------------------------------------------------------------------------------------------------|
| 1252 | 478752_length_1309_cvg_2.4_tip_1_2  | 19   | cytochrome p450 cyp44                                                                                                | 436 | 6.34E-145 | 65.30% | 0.099 | IPR002401 (PRINTS); IPR001128 (PRINTS); IPR001128 (G3DSA:1.10.630.GENE3D); IPR001128 (PFAM); PTHR24291:SF1 (PANTHER); PTHR24291 (PANTHER); IPR017972 (PROSITE_PATTERNS); IPR001128 (SUPERFAMILY)                                                                                                                                                                                                                                                                                                                                                                                   |
| 1271 | 479790_length_1333_cvg_59.8_tip_1_3 | 588  | huga_polan ame: full=hyaluronidase short=hya ame: full=hyaluronoglucosaminidase ame: allergen=pol a 2 flags: partial | 436 | 8.44E-72  | 57.00% | 0.262 | IPR001329 (PRINTS); IPR018155 (PRINTS); IPR013785 (G3DSA:3.20.20.GENE3D); IPR018155 (PFAM); PTHR11769:SF8 (PANTHER); IPR018155 (PANTHER); SIGNAL_PEPTIDE (PHOBIUS); SIGNAL_PEPTIDE_C_REGION (PHOBIUS); SIGNAL_PEPTIDE_H_REGION (PHOBIUS); SIGNAL_PEPTIDE_N_REGION (PHOBIUS); NON_CYTOPLASMIC_DOMAIN (PHOBIUS); IPR017853 (SUPERFAMILY); TMhelix (TMHMM)                                                                                                                                                                                                                            |
| 1253 | 478810_length_1310_cvg_2.9_tip_1_1  | 25   | ---NA---                                                                                                             | 437 |           |        | 0.173 | NON_CYTOPLASMIC_DOMAIN (PHOBIUS); CYTOPLASMIC_DOMAIN (PHOBIUS); TRANSMEMBRANE (PHOBIUS); CYTOPLASMIC_DOMAIN (PHOBIUS); TRANSMEMBRANE (PHOBIUS); TMhelix (TMHMM)                                                                                                                                                                                                                                                                                                                                                                                                                    |
| 1265 | 479538_length_1326_cvg_63.3_tip_1_4 | 5958 | ferritin                                                                                                             | 437 | 2.13E-83  | 84.70% | 0.275 | Coil (COILS); IPR008331 (PFAM); IPR012347 (G3DSA:1.20.1260.GENE3D); IPR001519 (PANTHER); IPR014034 (PROSITE_PATTERNS); IPR014034 (PROSITE_PATTERNS); CYTOPLASMIC_DOMAIN (PHOBIUS); CYTOPLASMIC_DOMAIN (PHOBIUS); TRANSMEMBRANE (PHOBIUS); TRANSMEMBRANE (PHOBIUS); TRANSMEMBRANE (PHOBIUS); CYTOPLASMIC_DOMAIN (PHOBIUS); NON_CYTOPLASMIC_DOMAIN (PHOBIUS); NON_CYTOPLASMIC_DOMAIN (PHOBIUS); TRANSMEMBRANE (PHOBIUS); IPR009040 (PROSITE_PROFILES); IPR009078 (SUPERFAMILY); TMhelix (TMHMM); TMhelix (TMHMM); TMhelix (TMHMM)                                                    |
| 1267 | 479624_length_1328_cvg_5.4_tip_1_4  | 39   | zinc finger protein 571- partial                                                                                     | 437 | 4.98E-30  | 52.30% | 0.103 | IPR015880 (SMART); IPR013087 (G3DSA:3.30.160.GENE3D); PF13912 (PFAM); IPR013087 (G3DSA:3.30.160.GENE3D); PF13465 (PFAM); PTHR24409 (PANTHER); PTHR24409:SF13 (PANTHER); IPR007087 (PROSITE_PATTERNS); IPR007087 (PROSITE_PATTERNS); IPR007087 (PROSITE_PATTERNS); IPR007087 (PROSITE_PATTERNS); IPR007087 (PROSITE_PROFILES); IPR007087 (PROSITE_PROFILES); IPR007087 (PROSITE_PROFILES); IPR007087 (PROSITE_PROFILES); IPR007087 (PROSITE_PROFILES); IPR007087 (PROSITE_PROFILES); SSF57667 (SUPERFAMILY); SSF57667 (SUPERFAMILY); SSF57667 (SUPERFAMILY); SSF57667 (SUPERFAMILY) |
| 1276 | 480012_length_1338_cvg_5.6_tip_1_0  | 36   | guanine nucleotide-binding protein subunit beta-5                                                                    | 438 | 2.20E-90  | 92.80% | 0.127 | IPR001680 (SMART); IPR001680 (PFAM); IPR015943 (G3DSA:2.130.10.GENE3D); IPR016346 (PANTHER); PTHR19850:SF12 (PANTHER); IPR019775 (PROSITE_PATTERNS); NON_CYTOPLASMIC_DOMAIN (PHOBIUS); TRANSMEMBRANE (PHOBIUS); CYTOPLASMIC_DOMAIN (PHOBIUS); IPR001680 (PROSITE_PROFILES); IPR001680 (PROSITE_PROFILES); IPR017986 (PROSITE_PROFILES); IPR001680 (PROSITE_PROFILES); IPR001680 (PROSITE_PROFILES); IPR017986 (SUPERFAMILY); IPR017986 (SUPERFAMILY); TMhelix (TMHMM)                                                                                                              |
| 1255 | 479036_length_1316_cvg_5.8_tip_1_1  | 47   | prophenol oxidase activating enzyme precursor                                                                        | 439 | 3.37E-48  | 52.10% | 0.156 | IPR001314 (PRINTS); IPR001254 (SMART); G3DSA:2.40.10.10 (GENE3D); IPR001254 (PFAM); IPR022700 (PFAM); G3DSA:2.40.10.10 (GENE3D); G3DSA:2.40.10.10 (GENE3D); PTHR24268:SF54 (PANTHER); PTHR24268 (PANTHER); IPR018114 (PROSITE_PATTERNS); NON_CYTOPLASMIC_DOMAIN (PHOBIUS); CYTOPLASMIC_DOMAIN (PHOBIUS); TRANSMEMBRANE (PHOBIUS); IPR001254 (PROSITE_PROFILES); IPR009003 (SUPERFAMILY); TMhelix (TMHMM)                                                                                                                                                                           |
| 1257 | 479090_length_1317_cvg_6.3_tip_1_2  | 41   | glucose dehydrogenase                                                                                                | 439 | 1.01E-39  | 81.10% | 0.127 | G3DSA:3.30.560.10 (GENE3D); IPR007867 (PFAM); G3DSA:3.50.50.60 (GENE3D); PTHR11552:SF68 (PANTHER); PTHR11552 (PANTHER); NON_CYTOPLASMIC_DOMAIN (PHOBIUS); CYTOPLASMIC_DOMAIN (PHOBIUS); TRANSMEMBRANE (PHOBIUS); SSF51905 (SUPERFAMILY); SSF54373 (SUPERFAMILY)                                                                                                                                                                                                                                                                                                                    |
| 1258 | 479118_length_1317_cvg_4.6_tip_1_5  | 28   | cyclin-c                                                                                                             | 439 | 9.44E-166 | 90.90% | 0.118 | IPR013763 (SMART); IPR006671 (PFAM); IPR013763 (G3DSA:1.10.472.GENE3D); IPR015429 (PANTHER); IPR013763 (SUPERFAMILY); IPR013763 (SUPERFAMILY)                                                                                                                                                                                                                                                                                                                                                                                                                                      |
| 1259 | 479134_length_1317_cvg_59.0_tip_1_2 | 430  | epoxide hydrolase 4                                                                                                  | 439 | 6.69E-104 | 62.00% | 0.099 | IPR000073 (PRINTS); IPR000639 (PRINTS); IPR000073 (PFAM); IPR029058 (G3DSA:3.40.50.GENE3D); PTHR10992:SF721 (PANTHER); PTHR10992 (PANTHER); NON_CYTOPLASMIC_DOMAIN (PHOBIUS); NON_CYTOPLASMIC_DOMAIN (PHOBIUS); TRANSMEMBRANE (PHOBIUS); TRANSMEMBRANE (PHOBIUS); CYTOPLASMIC_DOMAIN (PHOBIUS); IPR029058 (SUPERFAMILY); TMhelix (TMHMM)                                                                                                                                                                                                                                           |
| 1260 | 479224_length_1319_cvg_6.7_tip_1_5  | 26   | otogelin-like protein                                                                                                | 439 | 2.04E-15  | 45.30% | 0.102 | no IPS match                                                                                                                                                                                                                                                                                                                                                                                                                                                                                                                                                                       |



[illegible]



|      |                                     |        |                                            |     |           |        |       |                                                                                                                                                                                                                                                                                                                                                                                                                                                                                                                      |
|------|-------------------------------------|--------|--------------------------------------------|-----|-----------|--------|-------|----------------------------------------------------------------------------------------------------------------------------------------------------------------------------------------------------------------------------------------------------------------------------------------------------------------------------------------------------------------------------------------------------------------------------------------------------------------------------------------------------------------------|
| 1279 | 480236_length_1344_cvg_3.9_tip_1_1  | 30     | threonine synthase-like 2                  | 448 | 3.96E-108 | 72.50% | 0.141 | G3DSA:3.40.50.1100 (GENE3D); IPR029144 (G3DSA:3.90.1380.GENE3D); IPR029144 (PFAM); PTHR10314 (PANTHER); IPR027457 (PTHR10314:PANTHER); IPR001926 (SUPERFAMILY)                                                                                                                                                                                                                                                                                                                                                       |
| 1280 | 480238_length_1344_cvg_54.3_tip_1_4 | 452    | superoxide dismutase                       | 448 | 2.39E-43  | 66.30% | 0.147 | IPR001424 (PRINTS); IPR001424 (G3DSA:2.60.40.GENE3D); IPR001424 (PFAM); PTHR10003 (PANTHER); IPR018152 (PROSITE_PATTERNS); IPR018152 (PROSITE_PATTERNS); NON_CYTOPLASMIC_DOMAIN (PHOBIUS); TRANSMEMBRANE (PHOBIUS); CYTOPLASMIC_DOMAIN (PHOBIUS); IPR001424 (SUPERFAMILY)                                                                                                                                                                                                                                            |
| 1281 | 480276_length_1346_cvg_4.7_tip_1_5  | 38     | gpi-anchor transamidase                    | 448 | 1.88E-106 | 75.40% | 0.106 | IPR001096 (PRINTS); IPR001096 (PFAM); IPR001096 (PANTHER); IPR028361 (PTHR12000:PANTHER); NON_CYTOPLASMIC_DOMAIN (PHOBIUS); TRANSMEMBRANE (PHOBIUS); TRANSMEMBRANE (PHOBIUS); CYTOPLASMIC_DOMAIN (PHOBIUS); NON_CYTOPLASMIC_DOMAIN (PHOBIUS); TRANSMEMBRANE (PHOBIUS); CYTOPLASMIC_DOMAIN (PHOBIUS); TMhelix (TMHMM); TMhelix (TMHMM); TMhelix (TMHMM)                                                                                                                                                               |
| 1282 | 480454_length_1352_cvg_5.4_tip_1_1  | 36     | leukocyte elastase inhibitor a-like        | 451 | 5.64E-49  | 56.60% | 0.128 | IPR023796 (SMART); IPR023796 (PFAM); G3DSA:3.30.497.10 (GENE3D); IPR000215 (PANTHER); NON_CYTOPLASMIC_DOMAIN (PHOBIUS); NON_CYTOPLASMIC_DOMAIN (PHOBIUS); CYTOPLASMIC_DOMAIN (PHOBIUS); TRANSMEMBRANE (PHOBIUS); TRANSMEMBRANE (PHOBIUS); TRANSMEMBRANE (PHOBIUS); CYTOPLASMIC_DOMAIN (PHOBIUS); NON_CYTOPLASMIC_DOMAIN (PHOBIUS); TRANSMEMBRANE (PHOBIUS); IPR023796 (SUPERFAMILY); TMhelix (TMHMM); TMhelix (TMHMM); TMhelix (TMHMM)                                                                               |
| 1283 | 480460_length_1352_cvg_2.0_tip_1_1  | 16     | early growth response                      | 451 | 3.99E-114 | 57.00% | 0.103 | IPR015880 (SMART); PF13465 (PFAM); IPR013087 (G3DSA:3.30.160.GENE3D); IPR013087 (G3DSA:3.30.160.GENE3D); IPR013087 (G3DSA:3.30.160.GENE3D); PTHR10042 (PANTHER); PTHR10042:SF24 (PANTHER); IPR007087 (PROSITE_PATTERNS); IPR007087 (PROSITE_PATTERNS); IPR007087 (PROSITE_PATTERNS); IPR007087 (PROSITE_PROFILES); IPR007087 (PROSITE_PROFILES); SSF57667 (SUPERFAMILY); SSF57667 (SUPERFAMILY)                                                                                                                      |
| 1286 | 480662_length_1357_cvg_6.8_tip_1_4  | 52     | cleavage stimulation factor subunit 1-like | 452 | 0         | 85.70% | 0.138 | IPR001680 (SMART); IPR015943 (G3DSA:2.130.10.GENE3D); IPR001680 (PFAM); PTHR22840 (PANTHER); PTHR22840:SF8 (PANTHER); IPR019775 (PROSITE_PATTERNS); IPR001680 (PROSITE_PROFILES); IPR001680 (PROSITE_PROFILES); IPR001680 (PROSITE_PROFILES); IPR001680 (PROSITE_PROFILES); IPR017986 (PROSITE_PROFILES); IPR017986 (SUPERFAMILY)                                                                                                                                                                                    |
| 1287 | 480764_length_1359_cvg_6.4_tip_1_1  | 46     | activated cdc42 kinase 1 isoform x2        | 453 | 0         | 79.70% | 0.229 | IPR001245 (PRINTS); IPR020635 (SMART); G3DSA:1.10.510.10 (GENE3D); IPR001245 (PFAM); G3DSA:2.30.30.40 (GENE3D); G3DSA:3.30.200.20 (GENE3D); IPR030220 (PTHR24418:PANTHER); PTHR24418 (PANTHER); IPR017441 (PROSITE_PATTERNS); IPR008266 (PROSITE_PATTERNS); IPR000719 (PROSITE_PROFILES); IPR011009 (SUPERFAMILY)                                                                                                                                                                                                    |
| 1288 | 480844_length_1362_cvg_62.0_tip_1_2 | 395    | cyclin-g-associated kinase-like            | 454 | 9.20E-155 | 78.50% | 0.172 | IPR002290 (SMART); G3DSA:3.30.200.20 (GENE3D); G3DSA:1.10.510.10 (GENE3D); IPR000719 (PFAM); PTHR23172:SF19 (PANTHER); PTHR23172 (PANTHER); IPR008271 (PROSITE_PATTERNS); IPR000719 (PROSITE_PROFILES); IPR011009 (SUPERFAMILY)                                                                                                                                                                                                                                                                                      |
| 1290 | 480888_length_1363_cvg_55.7_tip_1_1 | 663    | cathepsin I                                | 454 | 0         | 80.90% | 0.139 | IPR000668 (PRINTS); IPR000668 (SMART); IPR013201 (SMART); IPR000668 (PFAM); IPR013201 (PFAM); G3DSA:3.90.70.10 (GENE3D); IPR013128 (PANTHER); PTHR12411:SF57 (PANTHER); IPR025660 (PROSITE_PATTERNS); IPR000169 (PROSITE_PATTERNS); IPR025661 (PROSITE_PATTERNS); CYTOPLASMIC_DOMAIN (PHOBIUS); TRANSMEMBRANE (PHOBIUS); TRANSMEMBRANE (PHOBIUS); NON_CYTOPLASMIC_DOMAIN (PHOBIUS); TRANSMEMBRANE (PHOBIUS); NON_CYTOPLASMIC_DOMAIN (PHOBIUS); CYTOPLASMIC_DOMAIN (PHOBIUS); SSF54001 (SUPERFAMILY); TMhelix (TMHMM) |
| 1289 | 480874_length_1363_cvg_8.3_tip_1_0  | 66     | lysyl-trna synthetase                      | 455 | 0         | 85.80% | 0.11  | Coil (COILS); IPR018149 (PRINTS); IPR004364 (PFAM); IPR004365 (PFAM); IPR012340 (G3DSA:2.40.50.GENE3D); IPR002313 (TIGRFAM); G3DSA:3.30.930.10 (GENE3D); IPR018150 (PANTHER); PTHR22594:SF4 (PANTHER); IPR006195 (PROSITE_PROFILES); IPR012340 (SUPERFAMILY); SSF55681 (SUPERFAMILY)                                                                                                                                                                                                                                 |
| 1291 | 480944_length_1365_cvg_78.9_tip_1_2 | 134111 | carboxypeptidase b-like                    | 455 | 6.11E-127 | 62.40% | 0.395 | IPR000834 (PRINTS); IPR000834 (SMART); IPR000834 (PFAM); IPR003146 (PFAM); G3DSA:3.40.630.10 (GENE3D); IPR003146 (G3DSA:3.30.70.GENE3D); PTHR11705 (PANTHER); IPR000834 (PROSITE_PATTERNS); SSF53187 (SUPERFAMILY); IPR009020 (SUPERFAMILY)                                                                                                                                                                                                                                                                          |

|      |                                     |        |                                                          |     |           |        |         |                                                                                                                                                                                                                                                                                                                                                                                                                                                                                                                                                                                                                                                                                                                                                                                                                                             |
|------|-------------------------------------|--------|----------------------------------------------------------|-----|-----------|--------|---------|---------------------------------------------------------------------------------------------------------------------------------------------------------------------------------------------------------------------------------------------------------------------------------------------------------------------------------------------------------------------------------------------------------------------------------------------------------------------------------------------------------------------------------------------------------------------------------------------------------------------------------------------------------------------------------------------------------------------------------------------------------------------------------------------------------------------------------------------|
| 1292 | 480978_length_1366_cvg_5.6_tip_1_5  | 33     | alk tyrosine kinase receptor isoform x1                  | 455 | 9.06E-112 | 58.40% | 0.124   | IPR002172 (SMART); IPR000998 (SMART); IPR002172 (G3DSA:4.10.400.GENE3D); IPR000998 (PFAM); IPR002172 (PFAM); PTHR23282 (PANTHER); IPR023415 (PROSITE_PATTERNS); IPR002172 (PROSITE_PROFILES); IPR000998 (PROSITE_PROFILES); IPR002172 (SUPERFAMILY); IPR013320 (SUPERFAMILY); IPR013320 (SUPERFAMILY)                                                                                                                                                                                                                                                                                                                                                                                                                                                                                                                                       |
| 1306 | 481774_length_1390_cvg_10.9_tip_1_0 | 63     | gamma-interferon-inducible lysosomal thiol reductase     | 455 | 4.09E-48  | 57.80% | 0.251   | IPR004911 (PFAM); PTHR13234:SF8 (PANTHER); IPR004911 (PANTHER); TRANSMEMBRANE (PHOBIUS); CYTOPLASMIC_DOMAIN (PHOBIUS); NON_CYTOPLASMIC_DOMAIN (PHOBIUS); NON_CYTOPLASMIC_DOMAIN (PHOBIUS); CYTOPLASMIC_DOMAIN (PHOBIUS); TRANSMEMBRANE (PHOBIUS); TRANSMEMBRANE (PHOBIUS); TMhelix (TMHMM); TMhelix (TMHMM)                                                                                                                                                                                                                                                                                                                                                                                                                                                                                                                                 |
| 1307 | 481780_length_1391_cvg_63.6_tip_1_5 | 401    | copper chaperone for superoxide dismutase                | 455 | 1.71E-111 | 77.00% | 0.434 Y | IPR001424 (PRINTS); IPR006121 (PFAM); IPR001424 (PFAM); IPR001424 (G3DSA:2.60.40.GENE3D); G3DSA:3.30.70.100 (GENE3D); PTHR10003 (PANTHER); IPR018152 (PROSITE_PATTERNS); SIGNAL_PEPTIDE_N_REGION (PHOBIUS); SIGNAL_PEPTIDE_C_REGION (PHOBIUS); TRANSMEMBRANE (PHOBIUS); CYTOPLASMIC_DOMAIN (PHOBIUS); NON_CYTOPLASMIC_DOMAIN (PHOBIUS); SIGNAL_PEPTIDE (PHOBIUS); SIGNAL_PEPTIDE_H_REGION (PHOBIUS); IPR006121 (PROSITE_PROFILES); IPR001424 (SUPERFAMILY); IPR006121 (SUPERFAMILY)                                                                                                                                                                                                                                                                                                                                                         |
| 1295 | 481114_length_1369_cvg_3.3_tip_1_1  | 31     | mam and ldl-receptor class a domain-containing protein 1 | 456 | 8.76E-35  | 46.60% | 0.104   | IPR002172 (PRINTS); IPR002172 (SMART); G3DSA:2.10.25.10 (GENE3D); IPR002172 (G3DSA:4.10.400.GENE3D); IPR000998 (PFAM); IPR002172 (PFAM); IPR002172 (G3DSA:4.10.400.GENE3D); PTHR23282 (PANTHER); PTHR23282:SF67 (PANTHER); IPR023415 (PROSITE_PATTERNS); IPR023415 (PROSITE_PATTERNS); IPR023415 (PROSITE_PATTERNS); IPR023415 (PROSITE_PATTERNS); IPR013032 (PROSITE_PATTERNS); TRANSMEMBRANE (PHOBIUS); NON_CYTOPLASMIC_DOMAIN (PHOBIUS); CYTOPLASMIC_DOMAIN (PHOBIUS); TRANSMEMBRANE (PHOBIUS); NON_CYTOPLASMIC_DOMAIN (PHOBIUS); TRANSMEMBRANE (PHOBIUS); CYTOPLASMIC_DOMAIN (PHOBIUS); IPR002172 (PROSITE_PROFILES); IPR000742 (PROSITE_PROFILES); IPR000998 (PROSITE_PROFILES); IPR002172 (PROSITE_PROFILES); IPR002172 (PROSITE_PROFILES); IPR002172 (SUPERFAMILY); SSF57196 (SUPERFAMILY); IPR002172 (SUPERFAMILY); TMhelix (TMHMM) |
| 1297 | 481134_length_1370_cvg_90.6_tip_1_2 | 176340 | carboxypeptidase b-like                                  | 456 | 1.31E-126 | 62.00% | 0.723 Y | IPR000834 (PRINTS); IPR000834 (SMART); G3DSA:3.40.630.10 (GENE3D); IPR003146 (G3DSA:3.30.70.GENE3D); IPR003146 (PFAM); IPR000834 (PFAM); PTHR11705 (PANTHER); IPR000834 (PROSITE_PATTERNS); SIGNAL_PEPTIDE_C_REGION (PHOBIUS); NON_CYTOPLASMIC_DOMAIN (PHOBIUS); SIGNAL_PEPTIDE_N_REGION (PHOBIUS); SIGNAL_PEPTIDE (PHOBIUS); SIGNAL_PEPTIDE_H_REGION (PHOBIUS); SignalP-noTM (SIGNALP_EUK); SSF53187 (SUPERFAMILY); IPR009020 (SUPERFAMILY)                                                                                                                                                                                                                                                                                                                                                                                                |
| 1314 | 482070_length_1400_cvg_62.4_tip_1_2 | 3335   | adp-ribosylation factor-like protein 8b-a                | 456 | 7.72E-124 | 97.70% | 0.114   | IPR006689 (PRINTS); IPR006687 (SMART); IPR003579 (SMART); IPR024156 (SMART); IPR006689 (PFAM); IPR005225 (TIGRFAM); IPR027417 (G3DSA:3.40.50.GENE3D); PTHR11711:SF122 (PANTHER); PTHR11711 (PANTHER); IPR024156 (PROSITE_PROFILES); IPR027417 (SUPERFAMILY)                                                                                                                                                                                                                                                                                                                                                                                                                                                                                                                                                                                 |
| 1293 | 481090_length_1369_cvg_3.2_tip_1_3  | 27     | upf0454 protein c12orf49 homolog                         | 457 | 1.59E-106 | 76.00% | 0.102   | IPR019352 (PFAM); IPR019352 (PANTHER); CYTOPLASMIC_DOMAIN (PHOBIUS); NON_CYTOPLASMIC_DOMAIN (PHOBIUS); TRANSMEMBRANE (PHOBIUS); TMhelix (TMHMM)                                                                                                                                                                                                                                                                                                                                                                                                                                                                                                                                                                                                                                                                                             |
| 1294 | 481112_length_1369_cvg_3.0_tip_1_0  | 22     | zinc finger protein                                      | 457 | 1.45E-22  | 59.40% | 0.166   | IPR015880 (SMART); IPR013087 (G3DSA:3.30.160.GENE3D); PF13894 (PFAM); IPR013087 (G3DSA:3.30.160.GENE3D); IPR013087 (G3DSA:3.30.160.GENE3D); IPR007087 (PFAM); PTHR24409 (PANTHER); PTHR24409:SF14 (PANTHER); IPR007087 (PROSITE_PATTERNS); IPR007087 (PROSITE_PATTERNS); IPR007087 (PROSITE_PATTERNS); IPR007087 (PROSITE_PATTERNS); IPR007087 (PROSITE_PROFILES); IPR007087 (PROSITE_PROFILES); IPR007087 (PROSITE_PROFILES); IPR007087 (PROSITE_PROFILES); IPR007087 (PROSITE_PROFILES); SSF57667 (SUPERFAMILY); SSF57667 (SUPERFAMILY)                                                                                                                                                                                                                                                                                                   |
| 1296 | 481132_length_1370_cvg_2.6_tip_1_1  | 23     | endothelin-converting enzyme 1 isoform x2                | 457 | 2.66E-150 | 66.30% | 0.191   | IPR018497 (PRINTS); IPR024079 (G3DSA:3.40.390.GENE3D); IPR018497 (PFAM); IPR008753 (PFAM); IPR029733 (PTHR11733:PANTHER); IPR000718 (PANTHER); TRANSMEMBRANE (PHOBIUS); CYTOPLASMIC_DOMAIN (PHOBIUS); NON_CYTOPLASMIC_DOMAIN (PHOBIUS); SSF55486 (SUPERFAMILY); TMhelix (TMHMM)                                                                                                                                                                                                                                                                                                                                                                                                                                                                                                                                                             |
| 1298 | 481206_length_1373_cvg_18.9_tip_1_5 | 132    | 15-hydroxyprostaglandin dehydrogenase                    | 457 | 7.56E-64  | 63.10% | 0.121   | IPR002198 (PRINTS); IPR002347 (PRINTS); IPR002198 (PFAM); IPR016040 (G3DSA:3.40.50.GENE3D); PTHR24310 (PANTHER); NON_CYTOPLASMIC_DOMAIN (PHOBIUS); TRANSMEMBRANE (PHOBIUS); CYTOPLASMIC_DOMAIN (PHOBIUS); SSF51735 (SUPERFAMILY)                                                                                                                                                                                                                                                                                                                                                                                                                                                                                                                                                                                                            |







|      |                                      |        |                                                               |     |           |        |         |                                                                                                                                                                                                                                                                                                                                                                                                                                                                                                                                                                                                                                              |
|------|--------------------------------------|--------|---------------------------------------------------------------|-----|-----------|--------|---------|----------------------------------------------------------------------------------------------------------------------------------------------------------------------------------------------------------------------------------------------------------------------------------------------------------------------------------------------------------------------------------------------------------------------------------------------------------------------------------------------------------------------------------------------------------------------------------------------------------------------------------------------|
| 1312 | 482004_length_1398_cvg_10.5_tip_1_5  | 82     | wd repeat-containing protein 3                                | 466 | 2.37E-143 | 69.20% | 0.357 Y | IPR020472 (PRINTS); IPR001680 (SMART); IPR015943 (G3DSA:2.130.10.GENE3D); IPR001680 (PFAM); PTHR19853:SF0 (PANTHER); PTHR19853 (PANTHER); IPR019775 (PROSITE_PATTERNS); IPR019775 (PROSITE_PATTERNS); IPR001680 (PROSITE_PROFILES); IPR001680 (PROSITE_PROFILES); IPR001680 (PROSITE_PROFILES); IPR017986 (PROSITE_PROFILES); IPR017986 (SUPERFAMILY); TMhelix (TMHMM)                                                                                                                                                                                                                                                                       |
| 1315 | 482076_length_1400_cvg_3.1_tip_1_5   | 25     | fat-like cadherin-related tumor suppressor homolog isoform x1 | 466 | 1.93E-143 | 76.20% | 0.106   | IPR002126 (PRINTS); IPR002126 (SMART); IPR002126 (G3DSA:2.60.40.GENE3D); IPR002126 (G3DSA:2.60.40.GENE3D); IPR002126 (PFAM); PTHR24026:SF39 (PANTHER); PTHR24026 (PANTHER); IPR020894 (PROSITE_PATTERNS); TRANSMEMBRANE (PHOBIUS); CYTOPLASMIC_DOMAIN (PHOBIUS); NON_CYTOPLASMIC_DOMAIN (PHOBIUS); IPR002126 (PROSITE_PROFILES); IPR002126 (PROSITE_PROFILES); IPR015919 (SUPERFAMILY); IPR015919 (SUPERFAMILY); IPR015919 (SUPERFAMILY); TMhelix (TMHMM)                                                                                                                                                                                    |
| 1329 | 482860_length_1423_cvg_106.2_tip_1_2 | 138989 | transmembrane protease serine 4                               | 466 | 4.08E-39  | 52.40% | 0.106   | IPR001314 (PRINTS); IPR001254 (SMART); G3DSA:2.40.10.10 (GENE3D); G3DSA:2.40.10.10 (GENE3D); G3DSA:2.40.10.10 (GENE3D); IPR001254 (PFAM); PTHR24268 (PANTHER); IPR018114 (PROSITE_PATTERNS); IPR018114 (PROSITE_PATTERNS); IPR001254 (PROSITE_PROFILES); IPR009003 (SUPERFAMILY)                                                                                                                                                                                                                                                                                                                                                             |
| 1327 | 482802_length_1422_cvg_5.2_tip_1_0   | 32     | interstitial collagenase                                      | 467 | 7.09E-24  | 61.10% | 0.153   | IPR018487 (SMART); IPR000585 (G3DSA:2.110.10.GENE3D); IPR018487 (PFAM); PTHR10201 (PANTHER); IPR018486 (PROSITE_PATTERNS); CYTOPLASMIC_DOMAIN (PHOBIUS); NON_CYTOPLASMIC_DOMAIN (PHOBIUS); TRANSMEMBRANE (PHOBIUS); IPR018487 (PROSITE_PROFILES); IPR018487 (PROSITE_PROFILES); IPR000585 (SUPERFAMILY)                                                                                                                                                                                                                                                                                                                                      |
| 1334 | 483152_length_1431_cvg_59.0_tip_1_5  | 431    | cytolysin src-1-like isoform x2                               | 467 | 7.84E-25  | 51.20% | 0.111   | IPR015926 (G3DSA:2.60.270.GENE3D); IPR009104 (PFAM); NON_CYTOPLASMIC_DOMAIN (PHOBIUS); TRANSMEMBRANE (PHOBIUS); CYTOPLASMIC_DOMAIN (PHOBIUS); IPR015926 (SUPERFAMILY); TMhelix (TMHMM)                                                                                                                                                                                                                                                                                                                                                                                                                                                       |
| 1317 | 482188_length_1403_cvg_5.6_tip_1_1   | 33     | nucleolar protein 58-like                                     | 468 | 0         | 83.60% | 0.166   | IPR012976 (SMART); IPR002687 (PFAM); IPR012976 (PFAM); IPR012974 (PFAM); PTHR10894 (PANTHER); IPR002687 (PROSITE_PROFILES); SSF89124 (SUPERFAMILY)                                                                                                                                                                                                                                                                                                                                                                                                                                                                                           |
| 1318 | 482370_length_1409_cvg_42.8_tip_1_3  | 505    | cyclin-h                                                      | 470 | 7.64E-157 | 81.70% | 0.121   | IPR013763 (SMART); IPR013763 (G3DSA:1.10.472.GENE3D); IPR013763 (G3DSA:1.10.472.GENE3D); IPR006671 (PFAM); IPR027081 (TIGRFAM); IPR015429 (PANTHER); IPR027081 (PTHR10026:PANTHER); IPR013763 (SUPERFAMILY); IPR013763 (SUPERFAMILY)                                                                                                                                                                                                                                                                                                                                                                                                         |
| 1319 | 482376_length_1409_cvg_8.8_tip_1_4   | 55     | scp-like extracellular domain containing protein 1            | 470 | 6.33E-37  | 49.50% | 0.101   | IPR002413 (PRINTS); IPR001283 (PRINTS); IPR014044 (SMART); IPR002172 (SMART); IPR002172 (G3DSA:4.10.400.GENE3D); IPR014044 (G3DSA:3.40.33.GENE3D); IPR002172 (PFAM); IPR002172 (G3DSA:4.10.400.GENE3D); IPR014044 (PFAM); IPR001283 (PANTHER); IPR018244 (PROSITE_PATTERNS); IPR023415 (PROSITE_PATTERNS); IPR023415 (PROSITE_PATTERNS); TRANSMEMBRANE (PHOBIUS); CYTOPLASMIC_DOMAIN (PHOBIUS); NON_CYTOPLASMIC_DOMAIN (PHOBIUS); IPR002172 (PROSITE_PROFILES); IPR002172 (PROSITE_PROFILES); IPR002172 (SUPERFAMILY); IPR014044 (SUPERFAMILY); IPR002172 (SUPERFAMILY); TMhelix (TMHMM)                                                     |
| 1320 | 482402_length_1410_cvg_16.6_tip_1_4  | 112    | zinc finger protein 431-like isoform x2                       | 470 | 1.99E-37  | 53.40% | 0.115   | IPR015880 (SMART); IPR013087 (G3DSA:3.30.160.GENE3D); PF13912 (PFAM); PF13465 (PFAM); IPR013087 (G3DSA:3.30.160.GENE3D); PTHR24409:SF13 (PANTHER); PTHR24409 (PANTHER); IPR007087 (PROSITE_PATTERNS); IPR007087 (PROSITE_PATTERNS); IPR007087 (PROSITE_PATTERNS); IPR007087 (PROSITE_PATTERNS); IPR007087 (PROSITE_PROFILES); IPR007087 (PROSITE_PROFILES); IPR007087 (PROSITE_PROFILES); IPR007087 (PROSITE_PROFILES); SSF57667 (SUPERFAMILY); SSF57667 (SUPERFAMILY); SSF57667 (SUPERFAMILY)                                                                                                                                               |
| 1321 | 482456_length_1412_cvg_62.8_tip_1_3  | 14361  | disulfide isomerase                                           | 471 | 0         | 81.70% | 0.622 Y | PR00421 (PRINTS); IPR005788 (TIGRFAM); IPR013766 (PFAM); IPR012336 (G3DSA:3.40.30.GENE3D); PF13848 (PFAM); IPR012336 (G3DSA:3.40.30.GENE3D); IPR005792 (TIGRFAM); PTHR18929 (PANTHER); PTHR18929:SF48 (PANTHER); IPR017937 (PROSITE_PATTERNS); IPR017937 (PROSITE_PATTERNS); SIGNAL_PEPTIDE_H_REGION (PHOBIUS); SIGNAL_PEPTIDE_N_REGION (PHOBIUS); SIGNAL_PEPTIDE (PHOBIUS); SIGNAL_PEPTIDE_C_REGION (PHOBIUS); NON_CYTOPLASMIC_DOMAIN (PHOBIUS); IPR012336 (PROSITE_PROFILES); IPR012336 (PROSITE_PROFILES); SignalP-noTM (SIGNALP_EUK); IPR012336 (SUPERFAMILY); IPR012336 (SUPERFAMILY); IPR012336 (SUPERFAMILY); IPR012336 (SUPERFAMILY) |

|      |                                     |        |                                                                         |     |           |         |       |                                                                                                                                                                                                                                                                                                                                                                                                                                                                                                                                                                                                                                                                                                                                                   |
|------|-------------------------------------|--------|-------------------------------------------------------------------------|-----|-----------|---------|-------|---------------------------------------------------------------------------------------------------------------------------------------------------------------------------------------------------------------------------------------------------------------------------------------------------------------------------------------------------------------------------------------------------------------------------------------------------------------------------------------------------------------------------------------------------------------------------------------------------------------------------------------------------------------------------------------------------------------------------------------------------|
| 1322 | 482486_length_1413_cvg_17.5_tip_1_2 | 125    | tho complex subunit 3                                                   | 471 | 0         | 86.90%  | 0.104 | IPR020472 (PRINTS); IPR001680 (SMART); IPR001680 (PFAM); IPR011659 (PFAM); IPR015943 (G3DSA:2.130.10.GENE3D); IPR015943 (G3DSA:2.130.10.GENE3D); PTHR22839 (PANTHER); IPR019775 (PROSITE_PATTERNS); TRANSMEMBRANE (PHOBIUS); NON_CYTOPLASMIC_DOMAIN (PHOBIUS); CYTOPLASMIC_DOMAIN (PHOBIUS); TRANSMEMBRANE (PHOBIUS); NON_CYTOPLASMIC_DOMAIN (PHOBIUS); IPR001680 (PROSITE_PROFILES); IPR001680 (PROSITE_PROFILES); IPR001680 (PROSITE_PROFILES); IPR017986 (PROSITE_PROFILES); IPR017986 (SUPERFAMILY); TMhelix (TMHMM); TMhelix (TMHMM)                                                                                                                                                                                                         |
| 1323 | 482516_length_1414_cvg_2.3_tip_1_2  | 22     | kae1 qri7 required for threonylcarbamoyladenine t a37 formation in trna | 471 | 5.73E-35  | 99.60%  | 0.111 | IPR000905 (PFAM); G3DSA:3.30.420.40 (GENE3D); PTHR11735 (PANTHER); SSF53067 (SUPERFAMILY)                                                                                                                                                                                                                                                                                                                                                                                                                                                                                                                                                                                                                                                         |
| 1324 | 482552_length_1415_cvg_6.9_tip_1_1  | 66     | beta-galactosidase and hygromycin phosphotransferase fusion protein     | 472 | 0         | 100.00% | 0.124 | IPR006101 (PRINTS); IPR006103 (PFAM); IPR013781 (G3DSA:3.20.20.GENE3D); IPR013812 (G3DSA:2.60.40.GENE3D); IPR008979 (G3DSA:2.60.120.GENE3D); IPR006102 (PFAM); IPR006104 (PFAM); PTHR10066:SF57 (PANTHER); PTHR10066 (PANTHER); IPR023232 (PROSITE_PATTERNS); IPR023230 (PROSITE_PATTERNS); IPR006102 (SUPERFAMILY); IPR008979 (SUPERFAMILY); IPR017853 (SUPERFAMILY)                                                                                                                                                                                                                                                                                                                                                                             |
| 1325 | 482658_length_1417_cvg_11.2_tip_1_2 | 80     | mitochondrial cardiolipin hydrolase-like                                | 472 | 1.28E-60  | 66.40%  | 0.151 | G3DSA:3.30.870.10 (GENE3D); IPR025202 (PFAM); PTHR21248 (PANTHER); TRANSMEMBRANE (PHOBIUS); TRANSMEMBRANE (PHOBIUS); CYTOPLASMIC_DOMAIN (PHOBIUS); TRANSMEMBRANE (PHOBIUS); CYTOPLASMIC_DOMAIN (PHOBIUS); NON_CYTOPLASMIC_DOMAIN (PHOBIUS); NON_CYTOPLASMIC_DOMAIN (PHOBIUS); TRANSMEMBRANE (PHOBIUS); CYTOPLASMIC_DOMAIN (PHOBIUS); IPR001736 (PROSITE_PROFILES); SSF56024 (SUPERFAMILY); TMhelix (TMHMM); TMhelix (TMHMM)                                                                                                                                                                                                                                                                                                                       |
| 1339 | 483386_length_1441_cvg_8.1_tip_1_3  | 56     | arylsulfatase b-like                                                    | 473 | 6.23E-143 | 66.20%  | 0.285 | IPR017849 (G3DSA:3.40.720.GENE3D); G3DSA:3.30.1120.10 (GENE3D); IPR000917 (PFAM); PTHR10342:SF206 (PANTHER); PTHR10342 (PANTHER); IPR024607 (PROSITE_PATTERNS); SIGNAL_PEPTIDE_C_REGION (PHOBIUS); SIGNAL_PEPTIDE_N_REGION (PHOBIUS); SIGNAL_PEPTIDE_H_REGION (PHOBIUS); NON_CYTOPLASMIC_DOMAIN (PHOBIUS); SIGNAL_PEPTIDE (PHOBIUS); IPR017850 (SUPERFAMILY)                                                                                                                                                                                                                                                                                                                                                                                      |
| 1328 | 482836_length_1422_cvg_63.1_tip_0_3 | 205020 | suppressor of tumorigenicity 14 protein                                 | 474 | 9.87E-70  | 51.60%  | 0.103 | IPR002172 (PRINTS); IPR001254 (SMART); IPR002172 (SMART); IPR001254 (PFAM); G3DSA:2.40.10.10 (GENE3D); IPR002172 (G3DSA:4.10.400.GENE3D); G3DSA:2.40.10.10 (GENE3D); G3DSA:4.10.1220.10 (GENE3D); IPR002172 (G3DSA:4.10.400.GENE3D); IPR002172 (PFAM); PTHR24256 (PANTHER); IPR018114 (PROSITE_PATTERNS); IPR023415 (PROSITE_PATTERNS); IPR023415 (PROSITE_PATTERNS); IPR018114 (PROSITE_PATTERNS); IPR023415 (PROSITE_PATTERNS); IPR023415 (PROSITE_PATTERNS); IPR002172 (PROSITE_PROFILES); IPR002172 (PROSITE_PROFILES); IPR002172 (PROSITE_PROFILES); IPR002172 (PROSITE_PROFILES); IPR002172 (PROSITE_PROFILES); IPR002172 (SUPERFAMILY); IPR002172 (SUPERFAMILY); IPR002172 (SUPERFAMILY); IPR002172 (SUPERFAMILY); IPR009003 (SUPERFAMILY) |
| 1357 | 484108_length_1466_cvg_80.7_tip_1_0 | 170597 | suppressor of tumorigenicity 14 protein homolog isoform x2              | 474 | 1.76E-52  | 45.80%  | 0.104 | IPR002172 (PRINTS); IPR001254 (SMART); IPR002172 (SMART); G3DSA:2.40.10.10 (GENE3D); IPR002172 (PFAM); G3DSA:2.40.10.10 (GENE3D); IPR002172 (G3DSA:4.10.400.GENE3D); IPR002172 (G3DSA:4.10.400.GENE3D); G3DSA:2.40.10.10 (GENE3D); IPR001254 (PFAM); PTHR24256:SF106 (PANTHER); PTHR24256 (PANTHER); IPR023415 (PROSITE_PATTERNS); IPR023415 (PROSITE_PATTERNS); IPR023415 (PROSITE_PATTERNS); NON_CYTOPLASMIC_DOMAIN (PHOBIUS); TRANSMEMBRANE (PHOBIUS); CYTOPLASMIC_DOMAIN (PHOBIUS); IPR001254 (PROSITE_PROFILES); IPR002172 (PROSITE_PROFILES); IPR002172 (PROSITE_PROFILES); IPR002172 (PROSITE_PROFILES); IPR009003 (SUPERFAMILY); IPR002172 (SUPERFAMILY); IPR002172 (SUPERFAMILY); IPR002172 (SUPERFAMILY)                                |
| 1330 | 482912_length_1424_cvg_12.8_tip_1_0 | 80     | sparc-related modular calcium-binding protein 1-like isoform x2         | 475 | 5.65E-124 | 56.90%  | 0.103 | IPR000716 (SMART); G3DSA:3.30.60.30 (GENE3D); IPR000716 (PFAM); IPR019577 (PFAM); IPR002350 (PFAM); IPR000716 (G3DSA:4.10.800.GENE3D); IPR011992 (G3DSA:1.10.238.GENE3D); PTHR12352 (PANTHER); PTHR12352:SF3 (PANTHER); IPR018247 (PROSITE_PATTERNS); IPR000716 (PROSITE_PATTERNS); IPR000716 (PROSITE_PATTERNS); IPR000716 (PROSITE_PROFILES); IPR002350 (PROSITE_PROFILES); IPR000716 (PROSITE_PROFILES); SSF100895 (SUPERFAMILY); IPR000716 (SUPERFAMILY); IPR000716 (SUPERFAMILY); SSF47473 (SUPERFAMILY); SSF47473 (SUPERFAMILY)                                                                                                                                                                                                             |

|      |                                     |      |                                                                       |     |           |        |       |                                                                                                                                                                                                                                                                                                                                                                                                                                                        |
|------|-------------------------------------|------|-----------------------------------------------------------------------|-----|-----------|--------|-------|--------------------------------------------------------------------------------------------------------------------------------------------------------------------------------------------------------------------------------------------------------------------------------------------------------------------------------------------------------------------------------------------------------------------------------------------------------|
| 1331 | 482978_length_1427_cvg_55.6_tip_1_5 | 346  | probable cytosolic iron-sulfur protein assembly protein<br>cioa1      | 475 | 2.60E-167 | 80.30% | 0.099 | IPR020472 (PRINTS); IPR001680 (SMART); IPR015943 (G3DSA:2.130.10.GENE3D); IPR001680 (PFAM); PTHR19920:SF0 (PANTHER); PTHR19920 (PANTHER); IPR019775 (PROSITE_PATTERNS); IPR001680 (PROSITE_PROFILES); IPR001680 (PROSITE_PROFILES); IPR001680 (PROSITE_PROFILES); IPR001680 (PROSITE_PROFILES); IPR017986 (PROSITE_PROFILES); IPR028608 (HAMAP); IPR001680 (PROSITE_PROFILES); IPR017986 (SUPERFAMILY)                                                 |
| 1332 | 483076_length_1429_cvg_30.1_tip_1_5 | 165  | cytochrome p450                                                       | 476 | 4.55E-90  | 77.60% | 0.107 | IPR002401 (PRINTS); IPR001128 (PRINTS); IPR001128 (G3DSA:1.10.630.GENE3D); IPR001128 (PFAM); PTHR24290 (PANTHER); PTHR24290:SF0 (PANTHER); IPR017972 (PROSITE_PATTERNS); CYTOPLASMIC_DOMAIN (PHOBIUS); TRANSMEMBRANE (PHOBIUS); NON_CYTOPLASMIC_DOMAIN (PHOBIUS); IPR001128 (SUPERFAMILY)                                                                                                                                                              |
| 1347 | 483674_length_1449_cvg_49.5_tip_1_3 | 336  | hypothetical protein DAPPUDRAFT_196945                                | 476 | 5.35E-89  | 64.80% | 0.149 | IPR019791 (PRINTS); IPR019791 (G3DSA:1.10.640.GENE3D); IPR019791 (PFAM); PTHR11475 (PANTHER); TRANSMEMBRANE (PHOBIUS); NON_CYTOPLASMIC_DOMAIN (PHOBIUS); CYTOPLASMIC_DOMAIN (PHOBIUS); IPR019791 (PROSITE_PROFILES); IPR010255 (SUPERFAMILY)                                                                                                                                                                                                           |
| 1333 | 483082_length_1429_cvg_2.1_tip_1_0  | 23   | endoplasmic reticulum mannosyl-oligosaccharide -<br>alpha-mannosidase | 477 | 4.70E-135 | 81.30% | 0.105 | IPR001382 (PRINTS); IPR001382 (PFAM); IPR001382 (G3DSA:1.50.10.GENE3D); PTHR11742:SF7 (PANTHER); IPR001382 (PANTHER); IPR001382 (SUPERFAMILY)                                                                                                                                                                                                                                                                                                          |
| 1335 | 483156_length_1432_cvg_9.8_tip_1_4  | 71   | lachesin                                                              | 477 | 9.25E-88  | 66.30% | 0.116 | IPR003599 (SMART); IPR003598 (SMART); IPR013783 (G3DSA:2.60.40.GENE3D); IPR013098 (PFAM); IPR013783 (G3DSA:2.60.40.GENE3D); PTHR19831:SF43 (PANTHER); PTHR19831 (PANTHER); IPR007110 (PROSITE_PROFILES); IPR007110 (PROSITE_PROFILES); IPR007110 (PROSITE_PROFILES); SSF48726 (SUPERFAMILY); SSF48726 (SUPERFAMILY); SSF48726 (SUPERFAMILY)                                                                                                            |
| 1336 | 483158_length_1432_cvg_8.1_tip_1_1  | 41   | syntaxin-12                                                           | 477 | 4.29E-95  | 72.00% | 0.196 | IPR006011 (SMART); IPR000727 (SMART); PF14523 (PFAM); G3DSA:1.20.58.70 (GENE3D); IPR000727 (PFAM); PTHR19957 (PANTHER); PTHR19957:SF87 (PANTHER); IPR006012 (PROSITE_PATTERNS); TRANSMEMBRANE (PHOBIUS); TRANSMEMBRANE (PHOBIUS); NON_CYTOPLASMIC_DOMAIN (PHOBIUS); CYTOPLASMIC_DOMAIN (PHOBIUS); CYTOPLASMIC_DOMAIN (PHOBIUS); IPR000727 (PROSITE_PROFILES); IPR010989 (SUPERFAMILY); TMhelix (TMHMM); TMhelix (TMHMM)                                |
| 1337 | 483218_length_1434_cvg_8.3_tip_1_2  | 53   | limbic system-associated membrane protein                             | 478 | 4.55E-150 | 69.70% | 0.122 | IPR003598 (SMART); IPR003599 (SMART); IPR013783 (G3DSA:2.60.40.GENE3D); IPR013098 (PFAM); IPR013783 (G3DSA:2.60.40.GENE3D); IPR003961 (PFAM); IPR013783 (G3DSA:2.60.40.GENE3D); PTHR19831 (PANTHER); PTHR19831:SF47 (PANTHER); IPR007110 (PROSITE_PROFILES); IPR007110 (PROSITE_PROFILES); IPR003961 (PROSITE_PROFILES); IPR007110 (PROSITE_PROFILES); SSF48726 (SUPERFAMILY); IPR003961 (SUPERFAMILY); SSF48726 (SUPERFAMILY); SSF48726 (SUPERFAMILY) |
| 1338 | 483352_length_1439_cvg_61.2_tip_1_5 | 2986 | muscle m-line assembly protein unc-89-like                            | 479 | 5.04E-158 | 75.90% | 0.103 | Coil (COILS); IPR003599 (SMART); IPR003598 (SMART); IPR013098 (PFAM); IPR013783 (G3DSA:2.60.40.GENE3D); IPR013783 (G3DSA:2.60.40.GENE3D); IPR013783 (G3DSA:2.60.40.GENE3D); PTHR19897 (PANTHER); PTHR19897:SF148 (PANTHER); IPR007110 (PROSITE_PROFILES); IPR007110 (PROSITE_PROFILES); IPR007110 (PROSITE_PROFILES); SSF48726 (SUPERFAMILY); SSF48726 (SUPERFAMILY); SSF48726 (SUPERFAMILY); SSF48726 (SUPERFAMILY)                                   |
| 1362 | 484396_length_1476_cvg_61.0_tip_1_4 | 641  | hyaluronidase-like                                                    | 480 | 2.93E-73  | 56.90% | 0.105 | IPR018155 (PRINTS); IPR013785 (G3DSA:3.20.20.GENE3D); IPR018155 (PFAM); PTHR11769:SF8 (PANTHER); IPR018155 (PANTHER); NON_CYTOPLASMIC_DOMAIN (PHOBIUS); CYTOPLASMIC_DOMAIN (PHOBIUS); TRANSMEMBRANE (PHOBIUS); IPR017853 (SUPERFAMILY)                                                                                                                                                                                                                 |
| 1340 | 483392_length_1441_cvg_5.7_tip_1_0  | 40   | apical endosomal glycoprotein                                         | 481 | 5.92E-15  | 46.20% | 0.131 | IPR000998 (PFAM); TRANSMEMBRANE (PHOBIUS); CYTOPLASMIC_DOMAIN (PHOBIUS); NON_CYTOPLASMIC_DOMAIN (PHOBIUS); TRANSMEMBRANE (PHOBIUS); NON_CYTOPLASMIC_DOMAIN (PHOBIUS); IPR000998 (PROSITE_PROFILES); IPR000998 (PROSITE_PROFILES); IPR013320 (SUPERFAMILY); TMhelix (TMHMM); TMhelix (TMHMM)                                                                                                                                                            |

|      |                                     |       |                                               |     |           |        |       |   |                                                                                                                                                                                                                                                                                                                                                                                                                                                                                                                                                                                                                                                                                                                                                            |
|------|-------------------------------------|-------|-----------------------------------------------|-----|-----------|--------|-------|---|------------------------------------------------------------------------------------------------------------------------------------------------------------------------------------------------------------------------------------------------------------------------------------------------------------------------------------------------------------------------------------------------------------------------------------------------------------------------------------------------------------------------------------------------------------------------------------------------------------------------------------------------------------------------------------------------------------------------------------------------------------|
| 1341 | 483480_length_1444_cvg_63.5_tip_1_2 | 10717 | st14a protein                                 | 481 | 5.16E-44  | 50.30% | 0.852 | Y | IPR001314 (PRINTS); IPR001254 (SMART); IPR002172 (SMART); G3DSA:2.40.10.10 (GENE3D); G3DSA:2.40.10.10 (GENE3D); IPR002172 (G3DSA:4.10.400.GENE3D); IPR001254 (PFAM); G3DSA:2.40.10.10 (GENE3D); IPR002172 (PFAM); PTHR24268 (PANTHER); IPR018114 (PROSITE_PATTERNS); IPR018114 (PROSITE_PATTERNS); IPR023415 (PROSITE_PATTERNS); SIGNAL_PEPTIDE_N_REGION (PHOBIUS); CYTOPLASMIC_DOMAIN (PHOBIUS); SIGNAL_PEPTIDE_C_REGION (PHOBIUS); SIGNAL_PEPTIDE (PHOBIUS); TRANSMEMBRANE (PHOBIUS); SIGNAL_PEPTIDE_H_REGION (PHOBIUS); NON_CYTOPLASMIC_DOMAIN (PHOBIUS); IPR001254 (PROSITE_PROFILES); IPR002172 (PROSITE_PROFILES); SignalP-noTM (SIGNALP_EUK); SignalP-TM (SIGNALP_GRAM_POSITIVE); IPR002172 (SUPERFAMILY); IPR009003 (SUPERFAMILY); TMhelix (TMHMM) |
| 1359 | 484188_length_1468_cvg_25.3_tip_1_0 | 210   | kielin chordin-like protein                   | 481 | 1.10E-34  | 48.20% | 0.316 |   | IPR001791 (SMART); IPR013320 (SUPERFAMILY)                                                                                                                                                                                                                                                                                                                                                                                                                                                                                                                                                                                                                                                                                                                 |
| 1342 | 483544_length_1446_cvg_72.0_tip_1_2 | 1785  | 26kda protease                                | 482 | 4.36E-46  | 56.90% | 0.306 |   | IPR001314 (PRINTS); IPR002172 (SMART); IPR001254 (SMART); IPR002172 (PFAM); G3DSA:2.40.10.10 (GENE3D); IPR002172 (G3DSA:4.10.400.GENE3D); G3DSA:2.40.10.10 (GENE3D); IPR001254 (PFAM); G3DSA:2.40.10.10 (GENE3D); PTHR24268 (PANTHER); IPR018114 (PROSITE_PATTERNS); IPR023415 (PROSITE_PATTERNS); IPR018114 (PROSITE_PATTERNS); NON_CYTOPLASMIC_DOMAIN (PHOBIUS); TRANSMEMBRANE (PHOBIUS); CYTOPLASMIC_DOMAIN (PHOBIUS); IPR001254 (PROSITE_PROFILES); IPR002172 (PROSITE_PROFILES); IPR009003 (SUPERFAMILY); IPR002172 (SUPERFAMILY)                                                                                                                                                                                                                     |
| 1343 | 483580_length_1447_cvg_9.2_tip_1_2  | 71    | 3-ketodihydrosphingosine reductase            | 482 | 1.95E-119 | 71.70% | 0.117 |   | IPR002347 (PRINTS); IPR002198 (PRINTS); IPR002198 (PFAM); IPR016040 (G3DSA:3.40.50.GENE3D); PTHR24320:SF1 (PANTHER); PTHR24320 (PANTHER); IPR020904 (PROSITE_PATTERNS); NON_CYTOPLASMIC_DOMAIN (PHOBIUS); TRANSMEMBRANE (PHOBIUS); NON_CYTOPLASMIC_DOMAIN (PHOBIUS); CYTOPLASMIC_DOMAIN (PHOBIUS); TRANSMEMBRANE (PHOBIUS); NON_CYTOPLASMIC_DOMAIN (PHOBIUS); TRANSMEMBRANE (PHOBIUS); CYTOPLASMIC_DOMAIN (PHOBIUS); TRANSMEMBRANE (PHOBIUS); SSF51735 (SUPERFAMILY); TMhelix (TMHMM); TMhelix (TMHMM); TMhelix (TMHMM); TMhelix (TMHMM)                                                                                                                                                                                                                   |
| 1344 | 483614_length_1448_cvg_18.2_tip_1_1 | 127   | pitslr serine threonine-protein kinase cdc2l1 | 483 | 0         | 88.10% | 0.102 |   | IPR002290 (SMART); G3DSA:3.30.200.20 (GENE3D); IPR000719 (PFAM); G3DSA:1.10.510.10 (GENE3D); PTHR24056:SF107 (PANTHER); PTHR24056 (PANTHER); IPR008271 (PROSITE_PATTERNS); IPR000719 (PROSITE_PROFILES); IPR011009 (SUPERFAMILY)                                                                                                                                                                                                                                                                                                                                                                                                                                                                                                                           |
| 1345 | 483628_length_1448_cvg_9.8_tip_1_1  | 68    | protein kinase domain-containing cytoplasmic  | 483 | 2.02E-104 | 58.60% | 0.142 |   | IPR022049 (PFAM); G3DSA:3.30.200.20 (GENE3D); G3DSA:1.10.510.10 (GENE3D); PTHR26392 (PANTHER); PTHR26392:SF71 (PANTHER); TRANSMEMBRANE (PHOBIUS); CYTOPLASMIC_DOMAIN (PHOBIUS); NON_CYTOPLASMIC_DOMAIN (PHOBIUS); IPR000719 (PROSITE_PROFILES); IPR011009 (SUPERFAMILY); TMhelix (TMHMM)                                                                                                                                                                                                                                                                                                                                                                                                                                                                   |
| 1346 | 483648_length_1449_cvg_9.0_tip_1_4  | 69    | adiponectin receptor protein                  | 483 | 0         | 80.70% | 0.138 |   | IPR004254 (PFAM); IPR004254 (PANTHER); PTHR20855:SF15 (PANTHER); CYTOPLASMIC_DOMAIN (PHOBIUS); CYTOPLASMIC_DOMAIN (PHOBIUS); NON_CYTOPLASMIC_DOMAIN (PHOBIUS); TRANSMEMBRANE (PHOBIUS); NON_CYTOPLASMIC_DOMAIN (PHOBIUS); TRANSMEMBRANE (PHOBIUS); CYTOPLASMIC_DOMAIN (PHOBIUS); CYTOPLASMIC_DOMAIN (PHOBIUS); NON_CYTOPLASMIC_DOMAIN (PHOBIUS); TRANSMEMBRANE (PHOBIUS); NON_CYTOPLASMIC_DOMAIN (PHOBIUS); TRANSMEMBRANE (PHOBIUS); TRANSMEMBRANE (PHOBIUS); TRANSMEMBRANE (PHOBIUS); CYTOPLASMIC_DOMAIN (PHOBIUS); TRANSMEMBRANE (PHOBIUS); TRANSMEMBRANE (PHOBIUS); TMhelix (TMHMM); TMhelix (TMHMM); TMhelix (TMHMM); TMhelix (TMHMM)                                                                                                                  |
| 1348 | 483684_length_1450_cvg_13.3_tip_1_4 | 89    | zinc finger protein 239- partial              | 483 | 1.05E-56  | 66.00% | 0.102 |   | IPR015880 (SMART); PF13465 (PFAM); IPR013087 (G3DSA:3.30.160.GENE3D); IPR013087 (G3DSA:3.30.160.GENE3D); IPR013087 (G3DSA:3.30.160.GENE3D); PTHR24409 (PANTHER); IPR007087 (PROSITE_PATTERNS); IPR007087 (PROSITE_PATTERNS); IPR007087 (PROSITE_PATTERNS); IPR007087 (PROSITE_PATTERNS); IPR007087 (PROSITE_PATTERNS); IPR007087 (PROSITE_PROFILES); SSF57667 (SUPERFAMILY); SSF57667 (SUPERFAMILY); SSF57667 (SUPERFAMILY)                                                                                                                                            |



|      |                                     |       |                                           |     |           |        |         |                                                                                                                                                                                                                                                                                                                                                                                                                                                                                                                                                                                                                                                                                          |
|------|-------------------------------------|-------|-------------------------------------------|-----|-----------|--------|---------|------------------------------------------------------------------------------------------------------------------------------------------------------------------------------------------------------------------------------------------------------------------------------------------------------------------------------------------------------------------------------------------------------------------------------------------------------------------------------------------------------------------------------------------------------------------------------------------------------------------------------------------------------------------------------------------|
| 1350 | 483712_length_1451_cvg_10.6_tip_1_5 | 83    | retinol dehydrogenase 12                  | 483 | 2.72E-95  | 61.10% | 0.215   | IPR002347 (PRINTS); IPR016040 (G3DSA:3.40.50.GENE3D); IPR002198 (PFAM); PTHR24320 (PANTHER); PTHR24320:SF55 (PANTHER); TRANSMEMBRANE (PHOBIUS); NON_CYTOPLASMIC_DOMAIN (PHOBIUS); NON_CYTOPLASMIC_DOMAIN (PHOBIUS); TRANSMEMBRANE (PHOBIUS); CYTOPLASMIC_DOMAIN (PHOBIUS); SSF51735 (SUPERFAMILY); TMhelix (TMHMM); TMhelix (TMHMM); TMhelix (TMHMM); TMhelix (TMHMM)                                                                                                                                                                                                                                                                                                                    |
| 1349 | 483686_length_1450_cvg_23.0_tip_1_0 | 161   | zinc finger protein 235-like              | 484 | 5.76E-40  | 49.10% | 0.1     | IPR015880 (SMART); IPR003656 (SMART); IPR007087 (PFAM); PF13894 (PFAM); IPR013087 (G3DSA:3.30.160.GENE3D); PF13465 (PFAM); IPR013087 (G3DSA:3.30.160.GENE3D); IPR013087 (G3DSA:3.30.160.GENE3D); PTHR24409:SF14 (PANTHER); PTHR24409 (PANTHER); IPR007087 (PROSITE_PATTERNS); IPR007087 (PROSITE_PATTERNS); IPR007087 (PROSITE_PATTERNS); IPR007087 (PROSITE_PATTERNS); IPR007087 (PROSITE_PATTERNS); IPR007087 (PROSITE_PROFILES); IPR007087 (PROSITE_PROFILES); IPR007087 (PROSITE_PROFILES); IPR007087 (PROSITE_PROFILES); IPR007087 (PROSITE_PROFILES); IPR007087 (PROSITE_PROFILES); SSF57667 (SUPERFAMILY); SSF57667 (SUPERFAMILY); SSF57667 (SUPERFAMILY); SSF57667 (SUPERFAMILY) |
| 1351 | 483730_length_1451_cvg_60.5_tip_1_1 | 1617  | ribosome biogenesis protein wdr12 homolog | 484 | 1.58E-180 | 74.50% | 0.134   | IPR020472 (PRINTS); IPR001680 (SMART); IPR015943 (G3DSA:2.130.10.GENE3D); IPR001680 (PFAM); IPR012972 (PFAM); IPR015943 (G3DSA:2.130.10.GENE3D); PTHR19855 (PANTHER); IPR019775 (PROSITE_PATTERNS); IPR001680 (PROSITE_PROFILES); IPR028599 (HAMAP); IPR001680 (PROSITE_PROFILES); IPR001680 (PROSITE_PROFILES); IPR001680 (PROSITE_PROFILES); IPR017986 (PROSITE_PROFILES); IPR017986 (SUPERFAMILY)                                                                                                                                                                                                                                                                                     |
| 1352 | 483792_length_1454_cvg_10.2_tip_1_5 | 56    | vanin-like protein 1                      | 484 | 3.96E-38  | 52.20% | 0.166   | IPR003010 (PFAM); IPR003010 (G3DSA:3.60.110.GENE3D); IPR012101 (PANTHER); TRANSMEMBRANE (PHOBIUS); NON_CYTOPLASMIC_DOMAIN (PHOBIUS); CYTOPLASMIC_DOMAIN (PHOBIUS); TRANSMEMBRANE (PHOBIUS); CYTOPLASMIC_DOMAIN (PHOBIUS); IPR003010 (PROSITE_PROFILES); IPR003010 (SUPERFAMILY); TMhelix (TMHMM)                                                                                                                                                                                                                                                                                                                                                                                         |
| 1363 | 484408_length_1477_cvg_66.4_tip_0_1 | 92717 | transmembrane protease serine 6           | 484 | 5.90E-45  | 49.40% | 0.834 Y | IPR001314 (PRINTS); IPR002172 (SMART); IPR001254 (SMART); IPR002172 (PFAM); IPR002172 (G3DSA:4.10.400.GENE3D); G3DSA:2.40.10.10 (GENE3D); IPR001254 (PFAM); G3DSA:2.40.10.10 (GENE3D); G3DSA:2.40.10.10 (GENE3D); PTHR24256 (PANTHER); IPR018114 (PROSITE_PATTERNS); IPR023415 (PROSITE_PATTERNS); SIGNAL_PEPTIDE_H_REGION (PHOBIUS); SIGNAL_PEPTIDE_C_REGION (PHOBIUS); SIGNAL_PEPTIDE_N_REGION (PHOBIUS); SIGNAL_PEPTIDE (PHOBIUS); NON_CYTOPLASMIC_DOMAIN (PHOBIUS); IPR001254 (PROSITE_PROFILES); IPR002172 (PROSITE_PROFILES); SignalP-noTM (SIGNALP_EUK); IPR002172 (SUPERFAMILY); IPR009003 (SUPERFAMILY)                                                                         |
| 1364 | 484492_length_1480_cvg_39.5_tip_1_4 | 224   | trans-l-3-hydroxyproline dehydratase      | 484 | 1.05E-143 | 76.00% | 0.301   | G3DSA:3.10.310.10 (GENE3D); G3DSA:3.10.310.10 (GENE3D); IPR008794 (PFAM); CYTOPLASMIC_DOMAIN (PHOBIUS); TRANSMEMBRANE (PHOBIUS); TRANSMEMBRANE (PHOBIUS); NON_CYTOPLASMIC_DOMAIN (PHOBIUS); NON_CYTOPLASMIC_DOMAIN (PHOBIUS); CYTOPLASMIC_DOMAIN (PHOBIUS); TRANSMEMBRANE (PHOBIUS); SSF54506 (SUPERFAMILY); TMhelix (TMHMM); TMhelix (TMHMM)                                                                                                                                                                                                                                                                                                                                            |
| 1353 | 483806_length_1455_cvg_18.5_tip_1_1 | 152   | leucine-rich repeat protein 1 isoform x2  | 485 | 2.22E-120 | 64.10% | 0.246   | PR00019 (PRINTS); IPR003591 (SMART); IPR001611 (PFAM); G3DSA:3.80.10.10 (GENE3D); PTHR23155 (PANTHER); IPR001611 (PROSITE_PROFILES); IPR001611 (PROSITE_PROFILES); IPR001611 (PROSITE_PROFILES); IPR001611 (PROSITE_PROFILES); IPR001611 (PROSITE_PROFILES); SSF52058 (SUPERFAMILY)                                                                                                                                                                                                                                                                                                                                                                                                      |

|  |  |  |  |  |  |  |  |  |                                                                                                                                                                                                                                                                                                                                                                                                                                                                                                                                                                                                                                                                                                                                                                                                                                                                                                                                                                                                                                                                                                                                                                                                                                                                                                                                                                                                                                                                                                                                                                                                                                                                                                                                                                                                                                                                                                                                                                                                                                                                                                                                                                                                                                                                                                                                                                                                                                                                                                                                                                                                                                                                                                                                                                                                                                                                                                                                                                                                                                                                                                                                                                                                                                                                                                                                                                                                                                                                                                                                                                                                                                                                                                                                                                                                                                                                                                                                                                                                                                                                                                                                                                                                                                                                                                                                                                                                                                                                                                                                                                                                                                                                                                                                                                                                                                                                                                                                                                                                                                                                                                                                                                                                                                                                                                                                                                                                                                                                                                                                                                                                                                                                                                                                                                                                                                                                                                                                                                                                                                                                                                                                                                                                                                                                                                                                                                                                                                                                                                                                                                                                                                                                                                                                                                                                                                                                                                                                                                                                                                                                                                                                                                                                                                                                                                                                                                                                                                                                                                                                                                                                                                                                                                                                                                                                                                                                                                                                                                                                                                                                                                                                                                                                                                                                                                                                                                                                                                                                                                                                                                                                                                                                                                                                                                                                                                                                                                                                                                                                                                                                                                                                                                                                                                                                                                                                                                                                                                                                                                                                                                                                                                                                                                                                                                                                                                                                                                                                                                                                                                                                                                                                                                                                                                                                                                                                                                                                                                                                                                                                                                                                                                                                                                                                                                                                                                                                                                                                                                                                                                                                                                                                                                                                                                                                                                                                                                                                                                                                                                                                                                                                                                                                                                                                                                                                                                                                                                                                                                                                                                                                                                                                                                                                                                                                                                                                                                                                                                                                                                                                                                                                                                                                                                                                                                                                                                                                                                                                                                                                                                                                                                                                                                                                                                                                                                                                                           |
|--|--|--|--|--|--|--|--|--|-----------------------------------------------------------------------------------------------------------------------------------------------------------------------------------------------------------------------------------------------------------------------------------------------------------------------------------------------------------------------------------------------------------------------------------------------------------------------------------------------------------------------------------------------------------------------------------------------------------------------------------------------------------------------------------------------------------------------------------------------------------------------------------------------------------------------------------------------------------------------------------------------------------------------------------------------------------------------------------------------------------------------------------------------------------------------------------------------------------------------------------------------------------------------------------------------------------------------------------------------------------------------------------------------------------------------------------------------------------------------------------------------------------------------------------------------------------------------------------------------------------------------------------------------------------------------------------------------------------------------------------------------------------------------------------------------------------------------------------------------------------------------------------------------------------------------------------------------------------------------------------------------------------------------------------------------------------------------------------------------------------------------------------------------------------------------------------------------------------------------------------------------------------------------------------------------------------------------------------------------------------------------------------------------------------------------------------------------------------------------------------------------------------------------------------------------------------------------------------------------------------------------------------------------------------------------------------------------------------------------------------------------------------------------------------------------------------------------------------------------------------------------------------------------------------------------------------------------------------------------------------------------------------------------------------------------------------------------------------------------------------------------------------------------------------------------------------------------------------------------------------------------------------------------------------------------------------------------------------------------------------------------------------------------------------------------------------------------------------------------------------------------------------------------------------------------------------------------------------------------------------------------------------------------------------------------------------------------------------------------------------------------------------------------------------------------------------------------------------------------------------------------------------------------------------------------------------------------------------------------------------------------------------------------------------------------------------------------------------------------------------------------------------------------------------------------------------------------------------------------------------------------------------------------------------------------------------------------------------------------------------------------------------------------------------------------------------------------------------------------------------------------------------------------------------------------------------------------------------------------------------------------------------------------------------------------------------------------------------------------------------------------------------------------------------------------------------------------------------------------------------------------------------------------------------------------------------------------------------------------------------------------------------------------------------------------------------------------------------------------------------------------------------------------------------------------------------------------------------------------------------------------------------------------------------------------------------------------------------------------------------------------------------------------------------------------------------------------------------------------------------------------------------------------------------------------------------------------------------------------------------------------------------------------------------------------------------------------------------------------------------------------------------------------------------------------------------------------------------------------------------------------------------------------------------------------------------------------------------------------------------------------------------------------------------------------------------------------------------------------------------------------------------------------------------------------------------------------------------------------------------------------------------------------------------------------------------------------------------------------------------------------------------------------------------------------------------------------------------------------------------------------------------------------------------------------------------------------------------------------------------------------------------------------------------------------------------------------------------------------------------------------------------------------------------------------------------------------------------------------------------------------------------------------------------------------------------------------------------------------------------------------------------------------------------------------------------------------------------------------------------------------------------------------------------------------------------------------------------------------------------------------------------------------------------------------------------------------------------------------------------------------------------------------------------------------------------------------------------------------------------------------------------------------------------------------------------------------------------------------------------------------------------------------------------------------------------------------------------------------------------------------------------------------------------------------------------------------------------------------------------------------------------------------------------------------------------------------------------------------------------------------------------------------------------------------------------------------------------------------------------------------------------------------------------------------------------------------------------------------------------------------------------------------------------------------------------------------------------------------------------------------------------------------------------------------------------------------------------------------------------------------------------------------------------------------------------------------------------------------------------------------------------------------------------------------------------------------------------------------------------------------------------------------------------------------------------------------------------------------------------------------------------------------------------------------------------------------------------------------------------------------------------------------------------------------------------------------------------------------------------------------------------------------------------------------------------------------------------------------------------------------------------------------------------------------------------------------------------------------------------------------------------------------------------------------------------------------------------------------------------------------------------------------------------------------------------------------------------------------------------------------------------------------------------------------------------------------------------------------------------------------------------------------------------------------------------------------------------------------------------------------------------------------------------------------------------------------------------------------------------------------------------------------------------------------------------------------------------------------------------------------------------------------------------------------------------------------------------------------------------------------------------------------------------------------------------------------------------------------------------------------------------------------------------------------------------------------------------------------------------------------------------------------------------------------------------------------------------------------------------------------------------------------------------------------------------------------------------------------------------------------------------------------------------------------------------------------------------------------------------------------------------------------------------------------------------------------------------------------------------------------------------------------------------------------------------------------------------------------------------------------------------------------------------------------------------------------------------------------------------------------------------------------------------------------------------------------------------------------------------------------------------------------------------------------------------------------------------------------------------------------------------------------------------------------------------------------------------------------------------------------------------------------------------------------------------------------------------------------------------------------------------------------------------------------------------------------------------------------------------------------------------------------------------------------------------------------------------------------------------------------------------------------------------------------------------------------------------------------------------------------------------------------------------------------------------------------------------------------------------------------------------------------------------------------------------------------------------------------------------------------------------------------------------------------------------------------------------------------------------------------------------------------------------------------------------------------------------------------------------------------------------------------------------------------------------------------------------------------------------------------------------------------------------------------------------------------------------------------------------------------------------------------------------------------------------------------------------------------------------------------------------------------------------------------------------------------------------------------------------------------------------------------------------------------------------------------------------------------------------------------------------------------------------------------------------------------------------------------------------------------------------------------------------------------------------------------------------|
|  |  |  |  |  |  |  |  |  | IPR015880 (SMART); IPR013087 (G3DSA:3.30.160.GENE3D); IPR007087 (PFAM); PF13894 (PFAM); IPR013087 (G3DSA:3.30.160.GENE3D); IPR013087 (G3DSA:3.30.160.GENE3D); IPR013087 (G3DSA:3.30.160.GENE3D); IPR013087 (G3DSA:3.30.160.GENE3D); PF13465 (PFAM); PTHR24409 (PANTHER); IPR007087 (PROSITE_PATTERNS); IPR007087 (PROSITE_P |
|--|--|--|--|--|--|--|--|--|-----------------------------------------------------------------------------------------------------------------------------------------------------------------------------------------------------------------------------------------------------------------------------------------------------------------------------------------------------------------------------------------------------------------------------------------------------------------------------------------------------------------------------------------------------------------------------------------------------------------------------------------------------------------------------------------------------------------------------------------------------------------------------------------------------------------------------------------------------------------------------------------------------------------------------------------------------------------------------------------------------------------------------------------------------------------------------------------------------------------------------------------------------------------------------------------------------------------------------------------------------------------------------------------------------------------------------------------------------------------------------------------------------------------------------------------------------------------------------------------------------------------------------------------------------------------------------------------------------------------------------------------------------------------------------------------------------------------------------------------------------------------------------------------------------------------------------------------------------------------------------------------------------------------------------------------------------------------------------------------------------------------------------------------------------------------------------------------------------------------------------------------------------------------------------------------------------------------------------------------------------------------------------------------------------------------------------------------------------------------------------------------------------------------------------------------------------------------------------------------------------------------------------------------------------------------------------------------------------------------------------------------------------------------------------------------------------------------------------------------------------------------------------------------------------------------------------------------------------------------------------------------------------------------------------------------------------------------------------------------------------------------------------------------------------------------------------------------------------------------------------------------------------------------------------------------------------------------------------------------------------------------------------------------------------------------------------------------------------------------------------------------------------------------------------------------------------------------------------------------------------------------------------------------------------------------------------------------------------------------------------------------------------------------------------------------------------------------------------------------------------------------------------------------------------------------------------------------------------------------------------------------------------------------------------------------------------------------------------------------------------------------------------------------------------------------------------------------------------------------------------------------------------------------------------------------------------------------------------------------------------------------------------------------------------------------------------------------------------------------------------------------------------------------------------------------------------------------------------------------------------------------------------------------------------------------------------------------------------------------------------------------------------------------------------------------------------------------------------------------------------------------------------------------------------------------------------------------------------------------------------------------------------------------------------------------------------------------------------------------------------------------------------------------------------------------------------------------------------------------------------------------------------------------------------------------------------------------------------------------------------------------------------------------------------------------------------------------------------------------------------------------------------------------------------------------------------------------------------------------------------------------------------------------------------------------------------------------------------------------------------------------------------------------------------------------------------------------------------------------------------------------------------------------------------------------------------------------------------------------------------------------------------------------------------------------------------------------------------------------------------------------------------------------------------------------------------------------------------------------------------------------------------------------------------------------------------------------------------------------------------------------------------------------------------------------------------------------------------------------------------------------------------------------------------------------------------------------------------------------------------------------------------------------------------------------------------------------------------------------------------------------------------------------------------------------------------------------------------------------------------------------------------------------------------------------------------------------------------------------------------------------------------------------------------------------------------------------------------------------------------------------------------------------------------------------------------------------------------------------------------------------------------------------------------------------------------------------------------------------------------------------------------------------------------------------------------------------------------------------------------------------------------------------------------------------------------------------------------------------------------------------------------------------------------------------------------------------------------------------------------------------------------------------------------------------------------------------------------------------------------------------------------------------------------------------------------------------------------------------------------------------------------------------------------------------------------------------------------------------------------------------------------------------------------------------------------------------------------------------------------------------------------------------------------------------------------------------------------------------------------------------------------------------------------------------------------------------------------------------------------------------------------------------------------------------------------------------------------------------------------------------------------------------------------------------------------------------------------------------------------------------------------------------------------------------------------------------------------------------------------------------------------------------------------------------------------------------------------------------------------------------------------------------------------------------------------------------------------------------------------------------------------------------------------------------------------------------------------------------------------------------------------------------------------------------------------------------------------------------------------------------------------------------------------------------------------------------------------------------------------------------------------------------------------------------------------------------------------------------------------------------------------------------------------------------------------------------------------------------------------------------------------------------------------------------------------------------------------------------------------------------------------------------------------------------------------------------------------------------------------------------------------------------------------------------------------------------------------------------------------------------------------------------------------------------------------------------------------------------------------------------------------------------------------------------------------------------------------------------------------------------------------------------------------------------------------------------------------------------------------------------------------------------------------------------------------------------------------------------------------------------------------------------------------------------------------------------------------------------------------------------------------------------------------------------------------------------------------------------------------------------------------------------------------------------------------------------------------------------------------------------------------------------------------------------------------------------------------------------------------------------------------------------------------------------------------------------------------------------------------------------------------------------------------------------------------------------------------------------------------------------------------------------------------------------------------------------------------------------------------------------------------------------------------------------------------------------------------------------------------------------------------------------------------------------------------------------------------------------------------------------------------------------------------------------------------------------------------------------------------------------------------------------------------------------------------------------------------------------------------------------------------------------------------------------------------------------------------------------------------------------------------------------------------------------------------------------------------------------------------------------------------------------------------------------------------------------------------------------------------------------------------------------------------------------------------------------------------------------------------------------------------------------------------------------------------------------------------------------------------------------------------------------------------------------------------------------------------------------------------------------------------------------------------------------------------------------------------------------------------------------------------------------------------------------------------------------------------------------------------------------------------------------------------------------------------------------------------------------------------------------------------------------------------------------------------------------------------------------------------------------------------------------------------------------------------------------------------------------------------------------------------------------------------------------------------------------------------------|

|      |                                     |     |                                                   |     |           |        |       |                                                                                                                                                                                                                                                                                                                                                                                                                                                                                                                                                                                                                                                                                                                                                                                                                                                                                                                                                     |
|------|-------------------------------------|-----|---------------------------------------------------|-----|-----------|--------|-------|-----------------------------------------------------------------------------------------------------------------------------------------------------------------------------------------------------------------------------------------------------------------------------------------------------------------------------------------------------------------------------------------------------------------------------------------------------------------------------------------------------------------------------------------------------------------------------------------------------------------------------------------------------------------------------------------------------------------------------------------------------------------------------------------------------------------------------------------------------------------------------------------------------------------------------------------------------|
| 1373 | 484904_length_1494_cvg_57.6_tip_1_4 | 500 | platelet-activating factor acetylhydrolase        | 487 | 2.00E-102 | 57.20% | 0.192 | Coil (COILS); IPR005065 (PFAM); IPR029058 (G3DSA:3.40.50.GENE3D); IPR005065 (PANTHER); IPR029058 (SUPERFAMILY)                                                                                                                                                                                                                                                                                                                                                                                                                                                                                                                                                                                                                                                                                                                                                                                                                                      |
| 1356 | 484074_length_1465_cvg_27.4_tip_1_5 | 193 | epidermal retinol dehydrogenase 2-like isoform x2 | 488 | 6.37E-112 | 71.70% | 0.102 | Coil (COILS); IPR002198 (PRINTS); IPR002347 (PRINTS); IPR016040 (G3DSA:3.40.50.GENE3D); IPR002198 (PFAM); PTHR24316 (PANTHER); PTHR24316:SF289 (PANTHER); TRANSMEMBRANE (PHOBIUS); NON_CYTOPLASMIC_DOMAIN (PHOBIUS); NON_CYTOPLASMIC_DOMAIN (PHOBIUS); TRANSMEMBRANE (PHOBIUS); CYTOPLASMIC_DOMAIN (PHOBIUS); CYTOPLASMIC_DOMAIN (PHOBIUS); TRANSMEMBRANE (PHOBIUS); TRANSMEMBRANE (PHOBIUS); NON_CYTOPLASMIC_DOMAIN (PHOBIUS); SSF51735 (SUPERFAMILY); TMhelix (TMHMM); TMhelix (TMHMM); TMhelix (TMHMM)                                                                                                                                                                                                                                                                                                                                                                                                                                           |
| 1358 | 484112_length_1466_cvg_22.0_tip_1_1 | 167 | upf0378 protein kiaa0100                          | 489 | 8.84E-62  | 54.20% | 0.091 | TRANSMEMBRANE (PHOBIUS); NON_CYTOPLASMIC_DOMAIN (PHOBIUS); CYTOPLASMIC_DOMAIN (PHOBIUS); NON_CYTOPLASMIC_DOMAIN (PHOBIUS); TRANSMEMBRANE (PHOBIUS); TMhelix (TMHMM)                                                                                                                                                                                                                                                                                                                                                                                                                                                                                                                                                                                                                                                                                                                                                                                 |
| 1371 | 484844_length_1492_cvg_6.7_tip_1_2  | 44  | zinc finger protein 84-like isoform x2            | 489 | 1.28E-62  | 55.10% | 0.098 | IPR015880 (SMART); PF13894 (PFAM); IPR013087 (G3DSA:3.30.160.GENE3D); IPR013087 (G3DSA:3.30.160.GENE3D); IPR013087 (G3DSA:3.30.160.GENE3D); PF13465 (PFAM); IPR007087 (PFAM); PTHR24409 (PANTHER); IPR007087 (PROSITE_PATTERNS); CYTOPLASMIC_DOMAIN (PHOBIUS); NON_CYTOPLASMIC_DOMAIN (PHOBIUS); NON_CYTOPLASMIC_DOMAIN (PHOBIUS); CYTOPLASMIC_DOMAIN (PHOBIUS); TRANSMEMBRANE (PHOBIUS); TRANSMEMBRANE (PHOBIUS); IPR007087 (PROSITE_PROFILES); IPR007087 (PROSITE_PROFILES); IPR007087 (PROSITE_PROFILES); IPR007087 (PROSITE_PROFILES); IPR007087 (PROSITE_PROFILES); IPR007087 (PROSITE_PROFILES); SSF57667 (SUPERFAMILY); SSF57667 (SUPERFAMILY); SSF57667 (SUPERFAMILY); SSF57667 (SUPERFAMILY); SSF57667 (SUPERFAMILY); TMhelix (TMHMM); TMhelix (TMHMM) |
| 1376 | 484986_length_1497_cvg_36.0_tip_1_3 | 250 | n-acetylglucosamine-6- partial                    | 490 | 4.38E-71  | 53.00% | 0.117 | IPR000917 (PFAM); IPR017849 (G3DSA:3.40.720.GENE3D); PTHR10342:SF208 (PANTHER); PTHR10342 (PANTHER); IPR017850 (SUPERFAMILY)                                                                                                                                                                                                                                                                                                                                                                                                                                                                                                                                                                                                                                                                                                                                                                                                                        |
| 1360 | 484350_length_1474_cvg_8.0_tip_1_1  | 59  | exocyst complex component 6                       | 491 | 0         | 82.20% | 0.242 | Coil (COILS); Coil (COILS); IPR007225 (PFAM); IPR007225 (PANTHER); TRANSMEMBRANE (PHOBIUS); NON_CYTOPLASMIC_DOMAIN (PHOBIUS); NON_CYTOPLASMIC_DOMAIN (PHOBIUS); CYTOPLASMIC_DOMAIN (PHOBIUS); TRANSMEMBRANE (PHOBIUS); TMhelix (TMHMM); TMhelix (TMHMM)                                                                                                                                                                                                                                                                                                                                                                                                                                                                                                                                                                                                                                                                                             |
| 1366 | 484512_length_1481_cvg_10.2_tip_1_4 | 89  | apolipoprotein d                                  | 494 | 1.38E-07  | 45.60% | 0.129 | IPR012674 (G3DSA:2.40.128.GENE3D); CYTOPLASMIC_DOMAIN (PHOBIUS); NON_CYTOPLASMIC_DOMAIN (PHOBIUS); TRANSMEMBRANE (PHOBIUS); IPR011038 (SUPERFAMILY)                                                                                                                                                                                                                                                                                                                                                                                                                                                                                                                                                                                                                                                                                                                                                                                                 |
| 1369 | 484680_length_1486_cvg_5.7_tip_1_1  | 53  | aldehyde mitochondrial                            | 495 | 0         | 85.60% | 0.105 | IPR016162 (G3DSA:3.40.605.GENE3D); IPR016163 (G3DSA:3.40.309.GENE3D); IPR015590 (PFAM); PTHR11699:SF151 (PANTHER); PTHR11699 (PANTHER); IPR029510 (PROSITE_PATTERNS); IPR016160 (PROSITE_PATTERNS); IPR016161 (SUPERFAMILY)                                                                                                                                                                                                                                                                                                                                                                                                                                                                                                                                                                                                                                                                                                                         |
| 1372 | 484878_length_1493_cvg_2.0_tip_1_2  | 14  | maltase a2-like isoform x1                        | 497 | 1.48E-83  | 53.20% | 0.1   | IPR006589 (SMART); IPR006047 (PFAM); IPR013781 (G3DSA:3.20.20.GENE3D); PTHR10357:SF133 (PANTHER); IPR015902 (PANTHER); NON_CYTOPLASMIC_DOMAIN (PHOBIUS); TRANSMEMBRANE (PHOBIUS); NON_CYTOPLASMIC_DOMAIN (PHOBIUS); CYTOPLASMIC_DOMAIN (PHOBIUS); TRANSMEMBRANE (PHOBIUS); CYTOPLASMIC_DOMAIN (PHOBIUS); TRANSMEMBRANE (PHOBIUS); IPR017853 (SUPERFAMILY)                                                                                                                                                                                                                                                                                                                                                                                                                                                                                                                                                                                           |
| 1374 | 484924_length_1495_cvg_19.2_tip_1_3 | 137 | d-aspartate oxidase                               | 499 | 1.82E-98  | 63.70% | 0.114 | IPR006076 (PFAM); IPR016040 (G3DSA:3.40.50.GENE3D); IPR023209 (PANTHER); PTHR11530:SF0 (PANTHER); IPR006181 (PROSITE_PATTERNS); NON_CYTOPLASMIC_DOMAIN (PHOBIUS); TRANSMEMBRANE (PHOBIUS); CYTOPLASMIC_DOMAIN (PHOBIUS); TRANSMEMBRANE (PHOBIUS); NON_CYTOPLASMIC_DOMAIN (PHOBIUS); SSF51971 (SUPERFAMILY); SSF54373 (SUPERFAMILY); TMhelix (TMHMM); TMhelix (TMHMM)                                                                                                                                                                                                                                                                                                                                                                                                                                                                                                                                                                                |







|      |                                     |     |                                        |     |           |        |         |                                                                                                                                                                                                                                                                                                                                                                                                                                                                                                                                                   |
|------|-------------------------------------|-----|----------------------------------------|-----|-----------|--------|---------|---------------------------------------------------------------------------------------------------------------------------------------------------------------------------------------------------------------------------------------------------------------------------------------------------------------------------------------------------------------------------------------------------------------------------------------------------------------------------------------------------------------------------------------------------|
| 1390 | 486004_length_1539_cvg_6.5_tip_1_0  | 48  | acidic phospholipase a2 pa4 isoform x2 | 513 | 1.00E-42  | 56.90% | 0.898 Y | IPR001211 (PFAM); IPR016090 (G3DSA:1.20.90.GENE3D); PTHR12253 (PANTHER); IPR013090 (PROSITE_PATTERNS); SIGNAL_PEPTIDE (PHOBIUS); NON_CYTOPLASMIC_DOMAIN (PHOBIUS); SIGNAL_PEPTIDE_C_REGION (PHOBIUS); SIGNAL_PEPTIDE_H_REGION (PHOBIUS); SIGNAL_PEPTIDE_N_REGION (PHOBIUS); SignalP-noTM (SIGNALP_GRAM_NEGATIVE); SignalP-TM (SIGNALP_GRAM_POSITIVE); SignalP-noTM (SIGNALP_EUK); IPR016090 (SUPERFAMILY)                                                                                                                                         |
| 1391 | 486082_length_1541_cvg_8.6_tip_1_2  | 73  | bola-like protein ddb_g0274169         | 513 | 9.51E-47  | 82.00% | 0.144   | IPR002634 (G3DSA:3.30.300.GENE3D); IPR002634 (PFAM); PTHR12735 (PANTHER); CYTOPLASMIC_DOMAIN (PHOBIUS); TRANSMEMBRANE (PHOBIUS); NON_CYTOPLASMIC_DOMAIN (PHOBIUS); IPR002634 (SUPERFAMILY)                                                                                                                                                                                                                                                                                                                                                        |
| 1398 | 486310_length_1551_cvg_22.0_tip_1_3 | 221 | serine proteinase stubble-like         | 513 | 2.38E-69  | 56.40% | 0.099   | IPR001314 (PRINTS); IPR001254 (SMART); G3DSA:2.40.10.10 (GENE3D); G3DSA:2.40.10.10 (GENE3D); IPR001254 (PFAM); PTHR24268 (PANTHER); IPR001254 (PROSITE_PROFILES); IPR009003 (SUPERFAMILY)                                                                                                                                                                                                                                                                                                                                                         |
| 1410 | 486648_length_1564_cvg_38.0_tip_1_1 | 248 | zinc finger protein 569-like           | 513 | 1.85E-25  | 47.90% | 0.181   | IPR015880 (SMART); IPR013087 (G3DSA:3.30.160.GENE3D); PF13912 (PFAM); PF13894 (PFAM); PF13465 (PFAM); IPR013087 (G3DSA:3.30.160.GENE3D); IPR013087 (G3DSA:3.30.160.GENE3D); PTHR24409 (PANTHER); PTHR24409:SF13 (PANTHER); IPR007087 (PROSITE_PATTERNS); IPR007087 (PROSITE_PATTERNS); IPR007087 (PROSITE_PATTERNS); IPR007087 (PROSITE_PATTERNS); IPR007087 (PROSITE_PROFILES); IPR007087 (PROSITE_PROFILES); IPR007087 (PROSITE_PROFILES); IPR007087 (PROSITE_PROFILES); SSF57667 (SUPERFAMILY); SSF57667 (SUPERFAMILY); SSF57667 (SUPERFAMILY) |
| 1392 | 486106_length_1542_cvg_6.8_tip_1_4  | 59  | folate receptor alpha-like             | 514 | 3.66E-80  | 68.10% | 0.299   | IPR018143 (PFAM); PTHR10517:SF3 (PANTHER); IPR004269 (PANTHER); NON_CYTOPLASMIC_DOMAIN (PHOBIUS); CYTOPLASMIC_DOMAIN (PHOBIUS); NON_CYTOPLASMIC_DOMAIN (PHOBIUS); CYTOPLASMIC_DOMAIN (PHOBIUS); TRANSMEMBRANE (PHOBIUS); TRANSMEMBRANE (PHOBIUS); TRANSMEMBRANE (PHOBIUS); NON_CYTOPLASMIC_DOMAIN (PHOBIUS); TRANSMEMBRANE (PHOBIUS); TMhelix (TMHMM); TMhelix (TMHMM); TMhelix (TMHMM)                                                                                                                                                           |
| 1393 | 486138_length_1543_cvg_37.2_tip_1_2 | 302 | proclotting enzyme                     | 514 | 8.60E-128 | 65.80% | 0.111   | IPR001314 (PRINTS); IPR006604 (SMART); IPR001254 (SMART); G3DSA:2.40.10.10 (GENE3D); IPR001254 (PFAM); G3DSA:2.40.10.10 (GENE3D); PTHR24268:SF81 (PANTHER); PTHR24268 (PANTHER); IPR018114 (PROSITE_PATTERNS); IPR018114 (PROSITE_PATTERNS); TRANSMEMBRANE (PHOBIUS); NON_CYTOPLASMIC_DOMAIN (PHOBIUS); CYTOPLASMIC_DOMAIN (PHOBIUS); NON_CYTOPLASMIC_DOMAIN (PHOBIUS); TRANSMEMBRANE (PHOBIUS); IPR001254 (PROSITE_PROFILES); IPR009003 (SUPERFAMILY); TMhelix (TMHMM)                                                                           |
| 1394 | 486148_length_1543_cvg_5.2_tip_1_4  | 47  | patj-like protein                      | 514 | 0         | 77.20% | 0.1     | IPR001478 (SMART); IPR001478 (PFAM); IPR001478 (G3DSA:2.30.42.GENE3D); IPR001478 (G3DSA:2.30.42.GENE3D); IPR001478 (G3DSA:2.30.42.GENE3D); PTHR19964:SF34 (PANTHER); PTHR19964 (PANTHER); IPR001478 (PROSITE_PROFILES); IPR001478 (PROSITE_PROFILES); IPR001478 (PROSITE_PROFILES); IPR001478 (SUPERFAMILY); IPR001478 (SUPERFAMILY); IPR001478 (SUPERFAMILY)                                                                                                                                                                                     |
| 1395 | 486166_length_1545_cvg_11.1_tip_1_2 | 60  | 26s protease regulatory subunit 8      | 515 | 0         | 97.10% | 0.1     | Coil (COILS); IPR003593 (SMART); IPR005937 (TIGRFAM); IPR003959 (PFAM); IPR027417 (G3DSA:3.40.50.GENE3D); G3DSA:1.10.8.60 (GENE3D); PTHR23073 (PANTHER); PTHR23073:SF12 (PANTHER); IPR003960 (PROSITE_PATTERNS); TRANSMEMBRANE (PHOBIUS); CYTOPLASMIC_DOMAIN (PHOBIUS); CYTOPLASMIC_DOMAIN (PHOBIUS); TRANSMEMBRANE (PHOBIUS); NON_CYTOPLASMIC_DOMAIN (PHOBIUS); IPR027417 (SUPERFAMILY)                                                                                                                                                          |
| 1396 | 486286_length_1549_cvg_4.2_tip_1_2  | 32  | nas-15 protein                         | 516 | 1.21E-46  | 59.80% | 0.101   | IPR001506 (PRINTS); IPR006026 (SMART); IPR001506 (PFAM); IPR024079 (G3DSA:3.40.390.GENE3D); PTHR10127 (PANTHER); TRANSMEMBRANE (PHOBIUS); TRANSMEMBRANE (PHOBIUS); NON_CYTOPLASMIC_DOMAIN (PHOBIUS); CYTOPLASMIC_DOMAIN (PHOBIUS); CYTOPLASMIC_DOMAIN (PHOBIUS); SSF55486 (SUPERFAMILY); TMhelix (TMHMM)                                                                                                                                                                                                                                          |
| 1397 | 486288_length_1550_cvg_6.1_tip_1_5  | 42  | allatostatin neuropeptide precursor    | 516 | 2.31E-44  | 53.60% | 0.097   | IPR010276 (PFAM); CYTOPLASMIC_DOMAIN (PHOBIUS); CYTOPLASMIC_DOMAIN (PHOBIUS); TRANSMEMBRANE (PHOBIUS); TRANSMEMBRANE (PHOBIUS); NON_CYTOPLASMIC_DOMAIN (PHOBIUS)                                                                                                                                                                                                                                                                                                                                                                                  |

|      |                                     |      |                                                        |     |           |        |         |                                                                                                                                                                                                                                                                                                                                                                                                                                                                                                                                                                                                                                  |
|------|-------------------------------------|------|--------------------------------------------------------|-----|-----------|--------|---------|----------------------------------------------------------------------------------------------------------------------------------------------------------------------------------------------------------------------------------------------------------------------------------------------------------------------------------------------------------------------------------------------------------------------------------------------------------------------------------------------------------------------------------------------------------------------------------------------------------------------------------|
| 1399 | 486358_length_1553_cvg_2.4_tip_1_1  | 29   | e3 ubiquitin-protein ligase mib2                       | 518 | 0         | 70.00% | 0.424 Y | Coil (COILS); IPR001841 (SMART); IPR002110 (SMART); IPR020683 (G3DSA:1.25.40.GENE3D); IPR020683 (PFAM); IPR013083 (G3DSA:3.30.40.GENE3D); PF13920 (PFAM); IPR020683 (G3DSA:1.25.40.GENE3D); IPR013083 (G3DSA:3.30.40.GENE3D); IPR002110 (PFAM); PTHR24202:SF4 (PANTHER); PTHR24202 (PANTHER); CYTOPLASMIC_DOMAIN (PHOBIUS); TRANSMEMBRANE (PHOBIUS); NON_CYTOPLASMIC_DOMAIN (PHOBIUS); IPR002110 (PROSITE_PROFILES); IPR001841 (PROSITE_PROFILES); IPR002110 (PROSITE_PROFILES); IPR002110 (PROSITE_PROFILES); IPR002110 (PROSITE_PROFILES); IPR020683 (PROSITE_PROFILES); IPR001841 (PROSITE_PROFILES); IPR020683 (SUPERFAMILY) |
| 1400 | 486420_length_1555_cvg_2.0_tip_1_4  | 27   | ly6 plaur domain-containing protein 6b-like isoform x1 | 518 | 2.64E-38  | 74.90% | 0.112   | G3DSA:2.10.60.10 (GENE3D); PTHR31171 (PANTHER); CYTOPLASMIC_DOMAIN (PHOBIUS); NON_CYTOPLASMIC_DOMAIN (PHOBIUS); TRANSMEMBRANE (PHOBIUS); SSF57302 (SUPERFAMILY)                                                                                                                                                                                                                                                                                                                                                                                                                                                                  |
| 1421 | 487016_length_1581_cvg_66.7_tip_1_2 | 1169 | chitinase domain-containing protein 1 isoform x1       | 518 | 2.97E-149 | 70.30% | 0.13    | IPR011583 (SMART); IPR013781 (G3DSA:3.20.20.GENE3D); IPR001223 (PFAM); PTHR11177:SF135 (PANTHER); PTHR11177 (PANTHER); CYTOPLASMIC_DOMAIN (PHOBIUS); NON_CYTOPLASMIC_DOMAIN (PHOBIUS); TRANSMEMBRANE (PHOBIUS); IPR017853 (SUPERFAMILY); TMhelix (TMHMM)                                                                                                                                                                                                                                                                                                                                                                         |
| 1401 | 486424_length_1555_cvg_63.6_tip_1_3 | 1357 | ferritin 1-like protein a                              | 519 | 3.11E-45  | 64.60% | 0.256   | IPR008331 (PFAM); IPR012347 (G3DSA:1.20.1260.GENE3D); PTHR11431:SF29 (PANTHER); IPR001519 (PANTHER); TRANSMEMBRANE (PHOBIUS); NON_CYTOPLASMIC_DOMAIN (PHOBIUS); CYTOPLASMIC_DOMAIN (PHOBIUS); IPR009040 (PROSITE_PROFILES); IPR009078 (SUPERFAMILY)                                                                                                                                                                                                                                                                                                                                                                              |
| 1402 | 486466_length_1557_cvg_24.2_tip_1_1 | 175  | polycomb protein eed                                   | 519 | 0         | 86.10% | 0.104   | IPR001680 (SMART); IPR015943 (G3DSA:2.130.10.GENE3D); IPR001680 (PFAM); PTHR10253 (PANTHER); IPR019775 (PROSITE_PATTERNS); IPR001680 (PROSITE_PROFILES); IPR001680 (PROSITE_PROFILES); IPR017986 (PROSITE_PROFILES); IPR017986 (SUPERFAMILY)                                                                                                                                                                                                                                                                                                                                                                                     |
| 1403 | 486472_length_1557_cvg_11.1_tip_1_3 | 75   | sh3 domain-containing ring finger protein 3 isoform x1 | 519 | 3.94E-68  | 52.50% | 0.116   | IPR001452 (SMART); G3DSA:2.30.30.40 (GENE3D); IPR001452 (PFAM); PTHR10661 (PANTHER); PTHR10661:SF7 (PANTHER); TRANSMEMBRANE (PHOBIUS); NON_CYTOPLASMIC_DOMAIN (PHOBIUS); CYTOPLASMIC_DOMAIN (PHOBIUS); IPR001452 (PROSITE_PROFILES); IPR001452 (SUPERFAMILY); TMhelix (TMHMM)                                                                                                                                                                                                                                                                                                                                                    |
| 1404 | 486474_length_1557_cvg_27.4_tip_1_4 | 147  | tropinone reductase 2-like                             | 519 | 4.42E-134 | 83.50% | 0.168   | IPR002198 (PRINTS); IPR002347 (PRINTS); IPR002198 (PFAM); IPR016040 (G3DSA:3.40.50.GENE3D); PTHR24322:SF111 (PANTHER); PTHR24322 (PANTHER); IPR020904 (PROSITE_PATTERNS); TRANSMEMBRANE (PHOBIUS); TRANSMEMBRANE (PHOBIUS); CYTOPLASMIC_DOMAIN (PHOBIUS); NON_CYTOPLASMIC_DOMAIN (PHOBIUS); NON_CYTOPLASMIC_DOMAIN (PHOBIUS); TRANSMEMBRANE (PHOBIUS); CYTOPLASMIC_DOMAIN (PHOBIUS); TRANSMEMBRANE (PHOBIUS); CYTOPLASMIC_DOMAIN (PHOBIUS); CYTOPLASMIC_DOMAIN (PHOBIUS); NON_CYTOPLASMIC_DOMAIN (PHOBIUS); SSF51735 (SUPERFAMILY); TMhelix (TMHMM); TMhelix (TMHMM); TMhelix (TMHMM); TMhelix (TMHMM)                           |
| 1405 | 486484_length_1557_cvg_2.9_tip_1_1  | 29   | dipeptidyl peptidase 1 isoform x1                      | 519 | 0         | 71.30% | 0.684 Y | IPR000668 (PRINTS); IPR000668 (SMART); IPR014882 (PFAM); IPR000668 (PFAM); IPR014882 (G3DSA:2.40.128.GENE3D); G3DSA:3.90.70.10 (GENE3D); IPR013128 (PANTHER); PTHR12411:SF314 (PANTHER); IPR000169 (PROSITE_PATTERNS); IPR025660 (PROSITE_PATTERNS); IPR025661 (PROSITE_PATTERNS); SignalP-noTM (SIGNALP_EUK); IPR014882 (SUPERFAMILY); SSF54001 (SUPERFAMILY)                                                                                                                                                                                                                                                                   |
| 1416 | 486860_length_1575_cvg_49.2_tip_1_5 | 395  | dnaj homolog subfamily c member 9                      | 519 | 1.54E-85  | 75.60% | 0.113   | Coil (COILS); Coil (COILS); IPR001623 (PRINTS); IPR001623 (SMART); IPR001623 (G3DSA:1.10.287.GENE3D); IPR001623 (PFAM); PTHR24078:SF166 (PANTHER); PTHR24078 (PANTHER); IPR018253 (PROSITE_PATTERNS); CYTOPLASMIC_DOMAIN (PHOBIUS); TRANSMEMBRANE (PHOBIUS); CYTOPLASMIC_DOMAIN (PHOBIUS); NON_CYTOPLASMIC_DOMAIN (PHOBIUS); TRANSMEMBRANE (PHOBIUS); IPR001623 (PROSITE_PROFILES); IPR001623 (SUPERFAMILY); TMhelix (TMHMM); TMhelix (TMHMM); TMhelix (TMHMM)                                                                                                                                                                   |
| 1419 | 486986_length_1580_cvg_18.7_tip_1_2 | 159  | ---NA---                                               | 519 |           |        | 0.101   | CYTOPLASMIC_DOMAIN (PHOBIUS); TRANSMEMBRANE (PHOBIUS); CYTOPLASMIC_DOMAIN (PHOBIUS); NON_CYTOPLASMIC_DOMAIN (PHOBIUS); TRANSMEMBRANE (PHOBIUS); NON_CYTOPLASMIC_DOMAIN (PHOBIUS); TRANSMEMBRANE (PHOBIUS)                                                                                                                                                                                                                                                                                                                                                                                                                        |
| 1407 | 486542_length_1560_cvg_20.6_tip_1_3 | 143  | tl5a_tactr ame: full=techylectin-5a flags: precursor   | 520 | 5.15E-54  | 60.80% | 0.106   | Coil (COILS); IPR002181 (SMART); IPR002181 (PFAM); IPR014716 (G3DSA:3.90.215.GENE3D); IPR014715 (G3DSA:4.10.530.GENE3D); PTHR19143 (PANTHER); IPR020837 (PROSITE_PATTERNS); IPR002181 (PROSITE_PROFILES); IPR002181 (SUPERFAMILY)                                                                                                                                                                                                                                                                                                                                                                                                |

[illegible]

|      |                                     |      |                                                   |     |           |        |         |                                                                                                                                                                                                                                                                                                                                                                                                                                                                                                                                                                                                                                                                       |
|------|-------------------------------------|------|---------------------------------------------------|-----|-----------|--------|---------|-----------------------------------------------------------------------------------------------------------------------------------------------------------------------------------------------------------------------------------------------------------------------------------------------------------------------------------------------------------------------------------------------------------------------------------------------------------------------------------------------------------------------------------------------------------------------------------------------------------------------------------------------------------------------|
| 1418 | 486924_length_1577_cvg_13.0_tip_1_5 | 91   | serine protease mitochondrial                     | 525 | 2.06E-130 | 73.50% | 0.125   | IPR001940 (PRINTS); IPR001478 (SMART); G3DSA:2.40.10.10 (GENE3D); PF13365 (PFAM); IPR001478 (PFAM); G3DSA:2.40.10.10 (GENE3D); IPR001478 (G3DSA:2.30.42.GENE3D); PTHR22939:SF69 (PANTHER); PTHR22939 (PANTHER); CYTOPLASMIC_DOMAIN (PHOBIUS); NON_CYTOPLASMIC_DOMAIN (PHOBIUS); TRANSMEMBRANE (PHOBIUS); IPR001478 (PROSITE_PROFILES); IPR009003 (SUPERFAMILY); IPR001478 (SUPERFAMILY)                                                                                                                                                                                                                                                                               |
| 1417 | 486912_length_1577_cvg_71.0_tip_1_0 | 659  | transcription factor sp5-like                     | 526 | 9.69E-74  | 53.80% | 0.29    | IPR015880 (SMART); IPR013087 (G3DSA:3.30.160.GENE3D); IPR013087 (G3DSA:3.30.160.GENE3D); PF13465 (PFAM); PTHR23223 (PANTHER); PTHR23223:SF15 (PANTHER); IPR007087 (PROSITE_PATTERNS); IPR007087 (PROSITE_PATTERNS); IPR007087 (PROSITE_PATTERNS); IPR007087 (PROSITE_PROFILES); IPR007087 (PROSITE_PROFILES); IPR007087 (PROSITE_PROFILES); SSF57667 (SUPERFAMILY); SSF57667 (SUPERFAMILY)                                                                                                                                                                                                                                                                            |
| 1420 | 486992_length_1580_cvg_3.7_tip_1_1  | 29   | dehydrogenase reductase sdr family member 11-like | 527 | 2.70E-102 | 74.50% | 0.13    | IPR002198 (PRINTS); IPR002347 (PRINTS); IPR002198 (PFAM); IPR016040 (G3DSA:3.40.50.GENE3D); PTHR24322 (PANTHER); PTHR24322:SF310 (PANTHER); CYTOPLASMIC_DOMAIN (PHOBIUS); TRANSMEMBRANE (PHOBIUS); NON_CYTOPLASMIC_DOMAIN (PHOBIUS); TRANSMEMBRANE (PHOBIUS); TRANSMEMBRANE (PHOBIUS); CYTOPLASMIC_DOMAIN (PHOBIUS); CYTOPLASMIC_DOMAIN (PHOBIUS); NON_CYTOPLASMIC_DOMAIN (PHOBIUS); SSF51735 (SUPERFAMILY); TMhelix (TMHMM); TMhelix (TMHMM); TMhelix (TMHMM); TMhelix (TMHMM)                                                                                                                                                                                       |
| 1432 | 487456_length_1607_cvg_63.0_tip_1_2 | 855  | serine protease snake                             | 527 | 3.88E-75  | 54.10% | 0.446 Y | IPR001314 (PRINTS); IPR001254 (SMART); IPR006604 (SMART); IPR001254 (PFAM); G3DSA:2.40.10.10 (GENE3D); G3DSA:2.40.10.10 (GENE3D); G3DSA:2.40.10.10 (GENE3D); PTHR24260:SF46 (PANTHER); PTHR24260 (PANTHER); IPR018114 (PROSITE_PATTERNS); IPR018114 (PROSITE_PATTERNS); IPR001254 (PROSITE_PROFILES); IPR009003 (SUPERFAMILY)                                                                                                                                                                                                                                                                                                                                         |
| 1422 | 487042_length_1583_cvg_20.6_tip_1_4 | 209  | beta- -galactosyltransferase 7                    | 528 | 1.03E-126 | 72.30% | 0.526 Y | IPR003859 (PRINTS); IPR027791 (PFAM); IPR029044 (G3DSA:3.90.550.GENE3D); IPR027995 (PFAM); PTHR19300:SF1 (PANTHER); IPR003859 (PANTHER); TRANSMEMBRANE (PHOBIUS); CYTOPLASMIC_DOMAIN (PHOBIUS); TRANSMEMBRANE (PHOBIUS); TRANSMEMBRANE (PHOBIUS); CYTOPLASMIC_DOMAIN (PHOBIUS); TRANSMEMBRANE (PHOBIUS); NON_CYTOPLASMIC_DOMAIN (PHOBIUS); TRANSMEMBRANE (PHOBIUS); CYTOPLASMIC_DOMAIN (PHOBIUS); NON_CYTOPLASMIC_DOMAIN (PHOBIUS); NON_CYTOPLASMIC_DOMAIN (PHOBIUS); TRANSMEMBRANE (PHOBIUS); CYTOPLASMIC_DOMAIN (PHOBIUS); SignalP-noTM (SIGNALP_EUK); IPR029044 (SUPERFAMILY); TMhelix (TMHMM); TMhelix (TMHMM); TMhelix (TMHMM); TMhelix (TMHMM); TMhelix (TMHMM) |
| 1423 | 487134_length_1588_cvg_8.5_tip_1_1  | 75   | neuropsin-like protein                            | 529 | 2.13E-18  | 61.20% | 0.104   | IPR010850 (PFAM); IPR011390 (PANTHER); TRANSMEMBRANE (PHOBIUS); TRANSMEMBRANE (PHOBIUS); TRANSMEMBRANE (PHOBIUS); CYTOPLASMIC_DOMAIN (PHOBIUS); TRANSMEMBRANE (PHOBIUS); CYTOPLASMIC_DOMAIN (PHOBIUS); NON_CYTOPLASMIC_DOMAIN (PHOBIUS); NON_CYTOPLASMIC_DOMAIN (PHOBIUS); CYTOPLASMIC_DOMAIN (PHOBIUS); TRANSMEMBRANE (PHOBIUS); NON_CYTOPLASMIC_DOMAIN (PHOBIUS); TRANSMEMBRANE (PHOBIUS); NON_CYTOPLASMIC_DOMAIN (PHOBIUS); CYTOPLASMIC_DOMAIN (PHOBIUS); TRANSMEMBRANE (PHOBIUS); IPR010850 (PRODOM); IPR009030 (SUPERFAMILY); TMhelix (TMHMM); TMhelix (TMHMM); TMhelix (TMHMM); TMhelix (TMHMM); TMhelix (TMHMM)                                                |
| 1426 | 487238_length_1593_cvg_18.7_tip_1_5 | 154  | arylsulfatase a-like                              | 531 | 0         | 68.20% | 0.440 Y | G3DSA:3.30.1120.10 (GENE3D); IPR017849 (G3DSA:3.40.720.GENE3D); IPR000917 (PFAM); PF14707 (PFAM); PTHR10342 (PANTHER); PTHR10342:SF22 (PANTHER); IPR024607 (PROSITE_PATTERNS); IPR024607 (PROSITE_PATTERNS); SIGNAL_PEPTIDE_C_REGION (PHOBIUS); SIGNAL_PEPTIDE_H_REGION (PHOBIUS); SIGNAL_PEPTIDE (PHOBIUS); SIGNAL_PEPTIDE_N_REGION (PHOBIUS); NON_CYTOPLASMIC_DOMAIN (PHOBIUS); IPR017850 (SUPERFAMILY); TMhelix (TMHMM)                                                                                                                                                                                                                                            |
| 1427 | 487240_length_1593_cvg_66.8_tip_1_3 | 2640 | twitchin isoform x1                               | 531 | 1.58E-137 | 70.40% | 0.1     | IPR003598 (SMART); IPR003599 (SMART); IPR013783 (G3DSA:2.60.40.GENE3D); IPR013783 (G3DSA:2.60.40.GENE3D); IPR013783 (G3DSA:2.60.40.GENE3D); IPR013098 (PFAM); PTHR19897 (PANTHER); CYTOPLASMIC_DOMAIN (PHOBIUS); TRANSMEMBRANE (PHOBIUS); NON_CYTOPLASMIC_DOMAIN (PHOBIUS); IPR007110 (PROSITE_PROFILES); IPR007110 (PROSITE_PROFILES); IPR007110 (PROSITE_PROFILES); SSF48726 (SUPERFAMILY); SSF48726 (SUPERFAMILY); SSF48726 (SUPERFAMILY)                                                                                                                                                                                                                          |

|      |                                     |     |                                                              |     |           |        |         |                                                                                                                                                                                                                                                                                                                                                                                                                                                                                                                                                                                                                                                                                                                                                       |
|------|-------------------------------------|-----|--------------------------------------------------------------|-----|-----------|--------|---------|-------------------------------------------------------------------------------------------------------------------------------------------------------------------------------------------------------------------------------------------------------------------------------------------------------------------------------------------------------------------------------------------------------------------------------------------------------------------------------------------------------------------------------------------------------------------------------------------------------------------------------------------------------------------------------------------------------------------------------------------------------|
| 1428 | 487328_length_1598_cvg_13.6_tip_1_4 | 133 | pdz domain-containing protein 11                             | 533 | 4.33E-50  | 76.90% | 0.105   | IPR001478 (SMART); IPR001478 (G3DSA:2.30.42.GENE3D); IPR001478 (PFAM); PTHR14063 (PANTHER); IPR001478 (PROSITE_PROFILES); IPR001478 (SUPERFAMILY)                                                                                                                                                                                                                                                                                                                                                                                                                                                                                                                                                                                                     |
| 1438 | 487638_length_1617_cvg_9.7_tip_1_4  | 72  | serine proteinase inhibitor b3                               | 533 | 5.43E-73  | 53.90% | 0.186   | IPR023796 (SMART); IPR023796 (PFAM); G3DSA:3.30.497.10 (GENE3D); G3DSA:2.30.39.10 (GENE3D); IPR000215 (PANTHER); IPR023795 (PROSITE_PATTERNS); TRANSMEMBRANE (PHOBIUS); NON_CYTOPLASMIC_DOMAIN (PHOBIUS); CYTOPLASMIC_DOMAIN (PHOBIUS); IPR023796 (SUPERFAMILY); TMhelix (TMHMM)                                                                                                                                                                                                                                                                                                                                                                                                                                                                      |
| 1429 | 487412_length_1604_cvg_15.0_tip_1_4 | 105 | gamma-aminobutyric acid type b receptor subunit 1 isoform x1 | 535 | 0         | 75.80% | 0.097   | Coil (COILS); PR01176 (PRINTS); IPR002456 (PRINTS); IPR017978 (PFAM); PTHR10519:SF3 (PANTHER); IPR002455 (PANTHER); TRANSMEMBRANE (PHOBIUS); NON_CYTOPLASMIC_DOMAIN (PHOBIUS); CYTOPLASMIC_DOMAIN (PHOBIUS); NON_CYTOPLASMIC_DOMAIN (PHOBIUS); CYTOPLASMIC_DOMAIN (PHOBIUS); NON_CYTOPLASMIC_DOMAIN (PHOBIUS); TRANSMEMBRANE (PHOBIUS); TRANSMEMBRANE (PHOBIUS); TRANSMEMBRANE (PHOBIUS); CYTOPLASMIC_DOMAIN (PHOBIUS); TRANSMEMBRANE (PHOBIUS); IPR017978 (PROSITE_PROFILES); TMhelix (TMHMM); TMhelix (TMHMM); TMhelix (TMHMM); TMhelix (TMHMM); TMhelix (TMHMM); TMhelix (TMHMM); TMhelix (TMHMM)                                                                                                                                                  |
| 1430 | 487450_length_1606_cvg_48.3_tip_1_4 | 342 | transmembrane protease serine 6                              | 535 | 1.55E-49  | 53.00% | 0.912 Y | IPR001314 (PRINTS); IPR001254 (SMART); IPR002172 (SMART); IPR001254 (PFAM); IPR002172 (PFAM); G3DSA:2.40.10.10 (GENE3D); G3DSA:2.40.10 (GENE3D); G3DSA:2.40.10.10 (GENE3D); IPR002172 (G3DSA:4.10.400.GENE3D); PTHR24256 (PANTHER); IPR018114 (PROSITE_PATTERNS); IPR018114 (PROSITE_PATTERNS); IPR023415 (PROSITE_PATTERNS); SIGNAL_PEPTIDE (PHOBIUS); SIGNAL_PEPTIDE_H_REGION (PHOBIUS); NON_CYTOPLASMIC_DOMAIN (PHOBIUS); SIGNAL_PEPTIDE_C_REGION (PHOBIUS); SIGNAL_PEPTIDE_N_REGION (PHOBIUS); CYTOPLASMIC_DOMAIN (PHOBIUS); TRANSMEMBRANE (PHOBIUS); IPR001254 (PROSITE_PROFILES); IPR002172 (PROSITE_PROFILES); SignalP-noTM (SIGNALP_EUK); IPR002172 (SUPERFAMILY); IPR009003 (SUPERFAMILY); TMhelix (TMHMM); TMhelix (TMHMM); TMhelix (TMHMM) |
| 1454 | 487998_length_1634_cvg_11.8_tip_1_4 | 117 | acetylcholine receptor subunit alpha-type acr-16             | 535 | 6.06E-112 | 59.90% | 0.171   | IPR006201 (PRINTS); IPR006202 (PFAM); IPR006029 (PFAM); IPR027361 (G3DSA:1.20.120.GENE3D); IPR006202 (G3DSA:2.70.170.GENE3D); PTHR18945:SF490 (PANTHER); IPR006201 (PANTHER); NON_CYTOPLASMIC_DOMAIN (PHOBIUS); TRANSMEMBRANE (PHOBIUS); TRANSMEMBRANE (PHOBIUS); TRANSMEMBRANE (PHOBIUS); NON_CYTOPLASMIC_DOMAIN (PHOBIUS); CYTOPLASMIC_DOMAIN (PHOBIUS); CYTOPLASMIC_DOMAIN (PHOBIUS); CYTOPLASMIC_DOMAIN (PHOBIUS); IPR006029 (SUPERFAMILY); IPR006202 (SUPERFAMILY); TMhelix (TMHMM); TMhelix (TMHMM); TMhelix (TMHMM); TMhelix (TMHMM)                                                                                                                                                                                                           |
| 1431 | 487454_length_1607_cvg_12.5_tip_1_3 | 97  | wd40 repeat-containing protein smu1                          | 536 | 0         | 93.90% | 0.105   | IPR020472 (PRINTS); IPR006594 (SMART); IPR006595 (SMART); IPR001680 (SMART); IPR015943 (G3DSA:2.130.10.GENE3D); IPR001680 (PFAM); PTHR22848 (PANTHER); IPR019775 (PROSITE_PATTERNS); IPR019775 (PROSITE_PATTERNS); IPR017986 (PROSITE_PROFILES); IPR006594 (PROSITE_PROFILES); IPR001680 (PROSITE_PROFILES); IPR001680 (PROSITE_PROFILES); IPR006595 (PROSITE_PROFILES); IPR001680 (PROSITE_PROFILES); IPR001680 (PROSITE_PROFILES); IPR001680 (PROSITE_PROFILES); IPR017986 (SUPERFAMILY)                                                                                                                                                                                                                                                            |
| 1433 | 487470_length_1607_cvg_4.3_tip_1_4  | 42  | serine threonine-protein kinase nek7                         | 536 | 2.76E-178 | 91.00% | 0.145   | IPR002290 (SMART); IPR000719 (PFAM); G3DSA:1.10.510.10 (GENE3D); G3DSA:3.30.200.20 (GENE3D); PTHR24362 (PANTHER); PTHR24362:SF228 (PANTHER); IPR008271 (PROSITE_PATTERNS); IPR017441 (PROSITE_PATTERNS); NON_CYTOPLASMIC_DOMAIN (PHOBIUS); TRANSMEMBRANE (PHOBIUS); TRANSMEMBRANE (PHOBIUS); CYTOPLASMIC_DOMAIN (PHOBIUS); NON_CYTOPLASMIC_DOMAIN (PHOBIUS); IPR000719 (PROSITE_PROFILES); IPR011009 (SUPERFAMILY); TMhelix (TMHMM); TMhelix (TMHMM)                                                                                                                                                                                                                                                                                                  |
| 1434 | 487506_length_1610_cvg_8.7_tip_1_5  | 76  | 26s protease regulatory subunit 6b                           | 536 | 0         | 96.20% | 0.098   | Coil (COILS); IPR003593 (SMART); IPR027417 (G3DSA:3.40.50.GENE3D); G3DSA:1.10.8.60 (GENE3D); IPR005937 (TIGRFAM); IPR003959 (PFAM); PTHR23073:SF8 (PANTHER); PTHR23073 (PANTHER); IPR003960 (PROSITE_PATTERNS); IPR027417 (SUPERFAMILY)                                                                                                                                                                                                                                                                                                                                                                                                                                                                                                               |



|      |                                     |        |                                                                 |     |           |        |         |                                                                                                                                                                                                                                                                                                                                                                                                                                                                                                                                                                                 |
|------|-------------------------------------|--------|-----------------------------------------------------------------|-----|-----------|--------|---------|---------------------------------------------------------------------------------------------------------------------------------------------------------------------------------------------------------------------------------------------------------------------------------------------------------------------------------------------------------------------------------------------------------------------------------------------------------------------------------------------------------------------------------------------------------------------------------|
| 1440 | 487690_length_1619_cvg_35.6_tip_1_1 | 292    | hydroxysteroid (17-beta)                                        | 536 | 1.15E-78  | 62.00% | 0.107   | IPR002198 (PRINTS); IPR002347 (PRINTS); IPR002198 (PFAM); IPR016040 (G3DSA:3.40.50.GENE3D); PTHR24316:SF68 (PANTHER); PTHR24316 (PANTHER); CYTOPLASMIC_DOMAIN (PHOBIUS); CYTOPLASMIC_DOMAIN (PHOBIUS); TRANSMEMBRANE (PHOBIUS); TRANSMEMBRANE (PHOBIUS); TRANSMEMBRANE (PHOBIUS); NON_CYTOPLASMIC_DOMAIN (PHOBIUS); NON_CYTOPLASMIC_DOMAIN (PHOBIUS); TRANSMEMBRANE (PHOBIUS); NON_CYTOPLASMIC_DOMAIN (PHOBIUS); SSF51735 (SUPERFAMILY); TMhelix (TMHMM); TMhelix (TMHMM); TMhelix (TMHMM); TMhelix (TMHMM)                                                                     |
| 1444 | 487764_length_1622_cvg_10.8_tip_1_0 | 90     | neuroendocrine partial                                          | 536 | 1.88E-108 | 62.30% | 0.13    | IPR002884 (PFAM); IPR000209 (G3DSA:3.40.50.GENE3D); IPR008979 (G3DSA:2.60.120.GENE3D); IPR000209 (PFAM); PTHR10795:SF340 (PANTHER); IPR015500 (PANTHER); IPR023828 (PROSITE_PATTERNS); IPR000209 (SUPERFAMILY); IPR008979 (SUPERFAMILY)                                                                                                                                                                                                                                                                                                                                         |
| 1435 | 487590_length_1614_cvg_52.5_tip_1_5 | 357    | cartilage intermediate layer protein 2-like                     | 538 | 8.32E-18  | 43.90% | 0.109   | IPR025155 (PFAM); NON_CYTOPLASMIC_DOMAIN (PHOBIUS); CYTOPLASMIC_DOMAIN (PHOBIUS); TRANSMEMBRANE (PHOBIUS); TMhelix (TMHMM)                                                                                                                                                                                                                                                                                                                                                                                                                                                      |
| 1437 | 487618_length_1616_cvg_5.0_tip_1_5  | 41     | serine threonine-protein phosphatase pp1-beta catalytic subunit | 538 | 0         | 97.30% | 0.115   | IPR006186 (PRINTS); IPR006186 (SMART); IPR004843 (PFAM); IPR029052 (G3DSA:3.60.21.GENE3D); PTHR11668:SF204 (PANTHER); PTHR11668 (PANTHER); IPR006186 (PROSITE_PATTERNS); TRANSMEMBRANE (PHOBIUS); NON_CYTOPLASMIC_DOMAIN (PHOBIUS); NON_CYTOPLASMIC_DOMAIN (PHOBIUS); CYTOPLASMIC_DOMAIN (PHOBIUS); TRANSMEMBRANE (PHOBIUS); IPR029052 (SUPERFAMILY)                                                                                                                                                                                                                            |
| 1436 | 487608_length_1615_cvg_16.3_tip_1_3 | 115    | flavin-containing monooxygenase fmo gs-ox4-like isoform x1      | 539 | 8.10E-134 | 62.90% | 0.308   | IPR000960 (PRINTS); IPR020946 (PFAM); G3DSA:3.50.50.60 (GENE3D); G3DSA:3.50.50.60 (GENE3D); PTHR23023:SF4 (PANTHER); PTHR23023 (PANTHER); SSF51905 (SUPERFAMILY); SSF51905 (SUPERFAMILY); TMhelix (TMHMM)                                                                                                                                                                                                                                                                                                                                                                       |
| 1439 | 487678_length_1619_cvg_73.4_tip_0_5 | 137565 | venom serine carboxypeptidase-like                              | 539 | 1.89E-59  | 58.30% | 0.102   | IPR001563 (PFAM); IPR029058 (G3DSA:3.40.50.GENE3D); IPR001563 (PANTHER); IPR018202 (PROSITE_PATTERNS); IPR029058 (SUPERFAMILY)                                                                                                                                                                                                                                                                                                                                                                                                                                                  |
| 1441 | 487710_length_1620_cvg_11.6_tip_1_5 | 85     | carbohydrate sulfotransferase 11-like                           | 540 | 1.54E-66  | 55.10% | 0.642 Y | IPR005331 (PFAM); IPR018011 (PANTHER); SIGNAL_PEPTIDE_H_REGION (PHOBIUS); SIGNAL_PEPTIDE_N_REGION (PHOBIUS); NON_CYTOPLASMIC_DOMAIN (PHOBIUS); SIGNAL_PEPTIDE_C_REGION (PHOBIUS); SIGNAL_PEPTIDE (PHOBIUS); SignalP-noTM (SIGNALP_EUK)                                                                                                                                                                                                                                                                                                                                          |
| 1442 | 487734_length_1621_cvg_5.2_tip_1_5  | 48     | aldehyde dimeric nadp-preferring isoform x4                     | 540 | 0         | 74.30% | 0.108   | IPR012394 (PIRSF); IPR015590 (PFAM); IPR016163 (G3DSA:3.40.309.GENE3D); IPR016162 (G3DSA:3.40.605.GENE3D); PTHR11699 (PANTHER); PTHR11699:SF15 (PANTHER); IPR029510 (PROSITE_PATTERNS); CYTOPLASMIC_DOMAIN (PHOBIUS); NON_CYTOPLASMIC_DOMAIN (PHOBIUS); TRANSMEMBRANE (PHOBIUS); IPR016161 (SUPERFAMILY); TMhelix (TMHMM)                                                                                                                                                                                                                                                       |
| 1443 | 487762_length_1622_cvg_32.7_tip_1_2 | 265    | notchless protein homolog 1                                     | 540 | 0         | 83.20% | 0.115   | IPR001632 (PRINTS); IPR020472 (PRINTS); IPR001680 (SMART); IPR015943 (G3DSA:2.130.10.GENE3D); IPR001680 (PFAM); IPR012972 (PFAM); PTHR19848:SF0 (PANTHER); PTHR19848 (PANTHER); IPR019775 (PROSITE_PATTERNS); IPR019775 (PROSITE_PATTERNS); IPR019775 (PROSITE_PATTERNS); IPR019775 (PROSITE_PATTERNS); IPR001680 (PROSITE_PROFILES); IPR017986 (PROSITE_PROFILES); IPR001680 (PROSITE_PROFILES); IPR001680 (PROSITE_PROFILES); IPR001680 (PROSITE_PROFILES); IPR001680 (PROSITE_PROFILES); IPR001680 (PROSITE_PROFILES); IPR001680 (PROSITE_PROFILES); IPR011047 (SUPERFAMILY) |
| 1464 | 488288_length_1650_cvg_26.2_tip_1_1 | 267    | dermatopontin 2                                                 | 540 | 2.97E-37  | 58.70% | 0.574 Y | PF14704 (PFAM); IPR026645 (PANTHER); SIGNAL_PEPTIDE_C_REGION (PHOBIUS); SIGNAL_PEPTIDE_N_REGION (PHOBIUS); SIGNAL_PEPTIDE (PHOBIUS); NON_CYTOPLASMIC_DOMAIN (PHOBIUS); SIGNAL_PEPTIDE_H_REGION (PHOBIUS); SignalP-TM (SIGNALP_GRAM_NEGATIVE); SignalP-TM (SIGNALP_EUK); SignalP-TM (SIGNALP_GRAM_POSITIVE); TMhelix (TMHMM)                                                                                                                                                                                                                                                     |
| 1445 | 487780_length_1623_cvg_44.9_tip_1_5 | 293    | ras-related protein rab-10                                      | 541 | 1.76E-116 | 92.90% | 0.182   | IPR001806 (PRINTS); IPR024156 (SMART); IPR003579 (SMART); IPR002041 (SMART); IPR020849 (SMART); IPR003578 (SMART); IPR027417 (G3DSA:3.40.50.GENE3D); IPR005225 (TIGRFAM); IPR001806 (PFAM); PTHR24073:SF456 (PANTHER); PTHR24073 (PANTHER); NON_CYTOPLASMIC_DOMAIN (PHOBIUS); TRANSMEMBRANE (PHOBIUS); CYTOPLASMIC_DOMAIN (PHOBIUS); PS51419 (PROSITE_PROFILES); IPR027417 (SUPERFAMILY)                                                                                                                                                                                        |



|      |                                     |     |                                        |     |           |        |         |                                                                                                                                                                                                                                                                                                                                                                                                                                                                                                                                                                                                                                                                                                         |
|------|-------------------------------------|-----|----------------------------------------|-----|-----------|--------|---------|---------------------------------------------------------------------------------------------------------------------------------------------------------------------------------------------------------------------------------------------------------------------------------------------------------------------------------------------------------------------------------------------------------------------------------------------------------------------------------------------------------------------------------------------------------------------------------------------------------------------------------------------------------------------------------------------------------|
| 1453 | 487928_length_1630_cvg_3.4_tip_1_4  | 27  | titin- partial                         | 543 | 1.92E-22  | 52.00% | 0.111   | NON_CYTOPLASMIC_DOMAIN (PHOBIUS); TRANSMEMBRANE (PHOBIUS); CYTOPLASMIC_DOMAIN (PHOBIUS); NON_CYTOPLASMIC_DOMAIN (PHOBIUS); TRANSMEMBRANE (PHOBIUS); TMhelix (TMHMM); TMhelix (TMHMM); TMhelix (TMHMM)                                                                                                                                                                                                                                                                                                                                                                                                                                                                                                   |
| 1466 | 488386_length_1656_cvg_7.5_tip_0_1  | 78  | transducin beta-like protein 2         | 544 | 1.69E-136 | 73.50% | 0.105   | Coil (COILS); IPR001680 (SMART); IPR015943 (G3DSA:2.130.10.GENE3D); IPR001680 (PFAM); PTHR22847:SF380 (PANTHER); PTHR22847 (PANTHER); IPR019775 (PROSITE_PATTERNS); CYTOPLASMIC_DOMAIN (PHOBIUS); NON_CYTOPLASMIC_DOMAIN (PHOBIUS); TRANSMEMBRANE (PHOBIUS); IPR001680 (PROSITE_PROFILES); IPR017986 (PROSITE_PROFILES); IPR001680 (PROSITE_PROFILES); IPR017986 (SUPERFAMILY)                                                                                                                                                                                                                                                                                                                          |
| 1455 | 488042_length_1637_cvg_3.4_tip_1_2  | 28  | aspartate--trna mitochondrial          | 545 | 0         | 72.50% | 0.102   | IPR002312 (PRINTS); G3DSA:3.30.930.10 (GENE3D); IPR004364 (PFAM); IPR004115 (G3DSA:3.30.1360.GENE3D); IPR004524 (TIGRFAM); IPR029351 (PFAM); IPR004524 (PTHR22594:PANTHER); IPR018150 (PANTHER); IPR006195 (PROSITE_PROFILES); SSF55681 (SUPERFAMILY); IPR004115 (SUPERFAMILY)                                                                                                                                                                                                                                                                                                                                                                                                                          |
| 1465 | 488360_length_1655_cvg_57.1_tip_1_0 | 535 | phosphoglycerate kinase                | 546 | 0         | 87.40% | 0.142   | IPR001576 (PRINTS); IPR015824 (G3DSA:3.40.50.GENE3D); IPR015901 (G3DSA:3.40.50.GENE3D); IPR001576 (PFAM); IPR001576 (PANTHER); PTHR11406:SF6 (PANTHER); IPR015911 (PROSITE_PATTERNS); NON_CYTOPLASMIC_DOMAIN (PHOBIUS); NON_CYTOPLASMIC_DOMAIN (PHOBIUS); TRANSMEMBRANE (PHOBIUS); CYTOPLASMIC_DOMAIN (PHOBIUS); TRANSMEMBRANE (PHOBIUS); IPR001576 (HAMAP); IPR001576 (SUPERFAMILY)                                                                                                                                                                                                                                                                                                                    |
| 1456 | 488116_length_1641_cvg_12.1_tip_1_0 | 129 | sulfhydryl oxidase 2-like              | 547 | 9.50E-63  | 60.60% | 0.135   | IPR017905 (G3DSA:1.20.120.GENE3D); IPR017905 (PFAM); PTHR22897 (PANTHER); PTHR22897:SF8 (PANTHER); IPR017905 (PROSITE_PROFILES); IPR017905 (SUPERFAMILY)                                                                                                                                                                                                                                                                                                                                                                                                                                                                                                                                                |
| 1457 | 488116_length_1641_cvg_12.1_tip_1_1 | 129 | sulfhydryl oxidase 1-like              | 547 | 5.07E-34  | 64.60% | 0.118   | IPR012336 (G3DSA:3.40.30.GENE3D); PTHR22897 (PANTHER); NON_CYTOPLASMIC_DOMAIN (PHOBIUS); TRANSMEMBRANE (PHOBIUS); CYTOPLASMIC_DOMAIN (PHOBIUS)                                                                                                                                                                                                                                                                                                                                                                                                                                                                                                                                                          |
| 1487 | 488918_length_1689_cvg_61.8_tip_1_2 | 795 | er membrane protein complex subunit 10 | 547 | 9.38E-72  | 63.70% | 0.18    | IPR029615 (PTHR21397:PANTHER); PTHR21397 (PANTHER); CYTOPLASMIC_DOMAIN (PHOBIUS); NON_CYTOPLASMIC_DOMAIN (PHOBIUS); NON_CYTOPLASMIC_DOMAIN (PHOBIUS); CYTOPLASMIC_DOMAIN (PHOBIUS); TRANSMEMBRANE (PHOBIUS); TRANSMEMBRANE (PHOBIUS); TRANSMEMBRANE (PHOBIUS); TRANSMEMBRANE (PHOBIUS); NON_CYTOPLASMIC_DOMAIN (PHOBIUS); CYTOPLASMIC_DOMAIN (PHOBIUS); TRANSMEMBRANE (PHOBIUS); CYTOPLASMIC_DOMAIN (PHOBIUS); TRANSMEMBRANE (PHOBIUS); TMhelix (TMHMM); TMhelix (TMHMM); TMhelix (TMHMM); TMhelix (TMHMM)                                                                                                                                                                                              |
| 1458 | 488172_length_1645_cvg_7.0_tip_1_5  | 59  | ga-binding protein subunit beta-2      | 548 | 4.33E-101 | 57.40% | 0.122   | Coil (COILS); IPR002110 (PRINTS); IPR002110 (SMART); IPR020683 (G3DSA:1.25.40.GENE3D); IPR020683 (PFAM); PTHR24193:SF73 (PANTHER); PTHR24193 (PANTHER); IPR002110 (PROSITE_PROFILES); IPR020683 (PROSITE_PROFILES); IPR002110 (PROSITE_PROFILES); IPR002110 (PROSITE_PROFILES); IPR020683 (SUPERFAMILY)                                                                                                                                                                                                                                                                                                                                                                                                 |
| 1459 | 488196_length_1646_cvg_39.1_tip_1_3 | 367 | polyubiquitin-c-like isoform 2         | 549 | 2.52E-155 | 99.00% | 0.102   | IPR019956 (PRINTS); IPR000626 (SMART); G3DSA:3.10.20.90 (GENE3D); IPR000626 (PFAM); PTHR10666 (PANTHER); IPR019954 (PROSITE_PATTERNS); IPR019954 (PROSITE_PATTERNS); IPR019954 (PROSITE_PATTERNS); NON_CYTOPLASMIC_DOMAIN (PHOBIUS); TRANSMEMBRANE (PHOBIUS); TRANSMEMBRANE (PHOBIUS); CYTOPLASMIC_DOMAIN (PHOBIUS); CYTOPLASMIC_DOMAIN (PHOBIUS); NON_CYTOPLASMIC_DOMAIN (PHOBIUS); NON_CYTOPLASMIC_DOMAIN (PHOBIUS); TRANSMEMBRANE (PHOBIUS); TRANSMEMBRANE (PHOBIUS); TRANSMEMBRANE (PHOBIUS); IPR000626 (PROSITE_PROFILES); IPR000626 (PROSITE_PROFILES); IPR000626 (PROSITE_PROFILES); IPR029071 (SUPERFAMILY); IPR029071 (SUPERFAMILY); IPR029071 (SUPERFAMILY); TMhelix (TMHMM); TMhelix (TMHMM) |
| 1460 | 488230_length_1647_cvg_2.5_tip_1_3  | 24  | isoform cra_b                          | 549 | 9.92E-76  | 78.50% | 0.136   | IPR002290 (SMART); G3DSA:3.30.200.20 (GENE3D); IPR000719 (PFAM); G3DSA:1.10.510.10 (GENE3D); PTHR24348 (PANTHER); IPR008271 (PROSITE_PATTERNS); IPR017441 (PROSITE_PATTERNS); IPR000719 (PROSITE_PROFILES); IPR011009 (SUPERFAMILY)                                                                                                                                                                                                                                                                                                                                                                                                                                                                     |
| 1461 | 488230_length_1647_cvg_2.5_tip_1_5  | 24  | serine threonine-protein kinase ulk3   | 549 | 5.59E-93  | 66.50% | 0.417 Y | Coil (COILS); IPR007330 (SMART); IPR002290 (SMART); IPR007330 (G3DSA:1.20.58.GENE3D); IPR000719 (PFAM); IPR007330 (PFAM); IPR007330 (G3DSA:1.20.58.GENE3D); G3DSA:1.10.510.10 (GENE3D); PTHR24348 (PANTHER); IPR000719 (PROSITE_PROFILES); IPR007330 (SUPERFAMILY); IPR011009 (SUPERFAMILY); IPR007330 (SUPERFAMILY)                                                                                                                                                                                                                                                                                                                                                                                    |







|      |                                     |      |                                                                         |     |           |        |       |                                                                                                                                                                                                                                                                                                                                                                                                                                                                                                                                                                      |
|------|-------------------------------------|------|-------------------------------------------------------------------------|-----|-----------|--------|-------|----------------------------------------------------------------------------------------------------------------------------------------------------------------------------------------------------------------------------------------------------------------------------------------------------------------------------------------------------------------------------------------------------------------------------------------------------------------------------------------------------------------------------------------------------------------------|
| 1480 | 488714_length_1677_cvg_25.3_tip_1_3 | 186  | 3-hydroxyisobutyrate mitochondrial                                      | 559 | 5.52E-151 | 81.30% | 0.306 | IPR013328 (G3DSA:1.10.1040.GENE3D); IPR011548 (TIGRFAM); IPR006115 (PFAM); IPR029154 (PFAM); IPR016040 (G3DSA:3.40.50.GENE3D); PTHR22981 (PANTHER); PTHR22981:SF51 (PANTHER); IPR002204 (PROSITE_PATTERNS); CYTOPLASMIC_DOMAIN (PHOBIUS); SIGNAL_PEPTIDE (PHOBIUS); SIGNAL_PEPTIDE_C_REGION (PHOBIUS); TRANSMEMBRANE (PHOBIUS); SIGNAL_PEPTIDE_H_REGION (PHOBIUS); SIGNAL_PEPTIDE_N_REGION (PHOBIUS); NON_CYTOPLASMIC_DOMAIN (PHOBIUS); SignalP-TM (SIGNALP_GRAM_POSITIVE); IPR008927 (SUPERFAMILY); SSF51735 (SUPERFAMILY)                                          |
| 1482 | 488762_length_1679_cvg_4.1_tip_1_2  | 37   | basement membrane-specific heparan sulfate proteoglycan core isoform x2 | 559 | 4.72E-104 | 75.40% | 0.145 | IPR013106 (SMART); IPR003598 (SMART); IPR003599 (SMART); IPR013106 (PFAM); IPR013783 (G3DSA:2.60.40.GENE3D); PF13895 (PFAM); PTHR23279 (PANTHER); TRANSMEMBRANE (PHOBIUS); CYTOPLASMIC_DOMAIN (PHOBIUS); TRANSMEMBRANE (PHOBIUS); CYTOPLASMIC_DOMAIN (PHOBIUS); TRANSMEMBRANE (PHOBIUS); NON_CYTOPLASMIC_DOMAIN (PHOBIUS); NON_CYTOPLASMIC_DOMAIN (PHOBIUS); TRANSMEMBRANE (PHOBIUS); NON_CYTOPLASMIC_DOMAIN (PHOBIUS); IPR007110 (PROSITE_PROFILES); IPR007110 (PROSITE_PROFILES); SSF48726 (SUPERFAMILY); SSF48726 (SUPERFAMILY); TMhelix (TMHMM); TMhelix (TMHMM) |
| 1483 | 488774_length_1680_cvg_35.5_tip_1_1 | 274  | zinc finger protein                                                     | 560 | 1.90E-15  | 61.00% | 0.1   | IPR015880 (SMART); PF13894 (PFAM); IPR013087 (G3DSA:3.30.160.GENE3D); PF13465 (PFAM); IPR013087 (G3DSA:3.30.160.GENE3D); PTHR24409 (PANTHER); PTHR24409:SF13 (PANTHER); IPR007087 (PROSITE_PATTERNS); IPR007087 (PROSITE_PATTERNS); CYTOPLASMIC_DOMAIN (PHOBIUS); NON_CYTOPLASMIC_DOMAIN (PHOBIUS); TRANSMEMBRANE (PHOBIUS); IPR007087 (PROSITE_PROFILES); IPR007087 (PROSITE_PROFILES); IPR007087 (PROSITE_PROFILES); SSF57667 (SUPERFAMILY); SSF57667 (SUPERFAMILY)                                                                                                |
| 1495 | 489138_length_1706_cvg_28.1_tip_1_3 | 1128 | adp-ribosylation factor-related protein 1                               | 560 | 1.52E-123 | 94.40% | 0.22  | IPR001806 (PRINTS); IPR006687 (SMART); IPR003579 (SMART); IPR024156 (SMART); IPR027417 (G3DSA:3.40.50.GENE3D); IPR006689 (PFAM); IPR005225 (TIGRFAM); PTHR11711 (PANTHER); PTHR11711:SF19 (PANTHER); NON_CYTOPLASMIC_DOMAIN (PHOBIUS); CYTOPLASMIC_DOMAIN (PHOBIUS); TRANSMEMBRANE (PHOBIUS); CYTOPLASMIC_DOMAIN (PHOBIUS); NON_CYTOPLASMIC_DOMAIN (PHOBIUS); TRANSMEMBRANE (PHOBIUS); TRANSMEMBRANE (PHOBIUS); CYTOPLASMIC_DOMAIN (PHOBIUS); IPR024156 (PROSITE_PROFILES); IPR027417 (SUPERFAMILY); TMhelix (TMHMM); TMhelix (TMHMM)                                |
| 1484 | 488816_length_1683_cvg_5.9_tip_1_1  | 76   | cd109 antigen-like isoform x2                                           | 561 | 0         | 74.80% | 0.168 | IPR009048 (G3DSA:2.60.40.GENE3D); IPR011626 (PFAM); IPR008930 (G3DSA:1.50.10.GENE3D); IPR009048 (PFAM); PTHR11412:SF84 (PANTHER); PTHR11412 (PANTHER); NON_CYTOPLASMIC_DOMAIN (PHOBIUS); CYTOPLASMIC_DOMAIN (PHOBIUS); TRANSMEMBRANE (PHOBIUS); IPR008930 (SUPERFAMILY); IPR009048 (SUPERFAMILY); TMhelix (TMHMM)                                                                                                                                                                                                                                                    |
| 1496 | 489166_length_1707_cvg_9.6_tip_1_0  | 103  | aael005189- partial                                                     | 561 | 3.87E-128 | 69.30% | 0.129 | IPR003112 (SMART); IPR003112 (PFAM); PTHR23192:SF33 (PANTHER); PTHR23192 (PANTHER); TRANSMEMBRANE (PHOBIUS); CYTOPLASMIC_DOMAIN (PHOBIUS); NON_CYTOPLASMIC_DOMAIN (PHOBIUS); IPR003112 (PROSITE_PROFILES); TMhelix (TMHMM); TMhelix (TMHMM)                                                                                                                                                                                                                                                                                                                          |
| 1485 | 488842_length_1685_cvg_11.5_tip_1_0 | 165  | hemocyte protein-glutamine gamma-glutamyltransferase-like               | 562 | 0         | 72.10% | 0.145 | IPR002931 (SMART); IPR002931 (PFAM); IPR002931 (G3DSA:3.90.260.GENE3D); IPR013783 (G3DSA:2.60.40.GENE3D); IPR008958 (PFAM); IPR023608 (PIRSF); IPR013783 (G3DSA:2.60.40.GENE3D); IPR023608 (PANTHER); PTHR11590:SF40 (PANTHER); IPR008958 (SUPERFAMILY); SSF54001 (SUPERFAMILY); IPR008958 (SUPERFAMILY)                                                                                                                                                                                                                                                             |
| 1486 | 488890_length_1688_cvg_9.6_tip_1_5  | 70   | sepiapterin reductase-like                                              | 562 | 1.75E-80  | 63.70% | 0.114 | IPR002347 (PRINTS); IPR006393 (TIGRFAM); IPR016040 (G3DSA:3.40.50.GENE3D); IPR002198 (PFAM); PTHR24318 (PANTHER); PTHR24318:SF1 (PANTHER); TRANSMEMBRANE (PHOBIUS); NON_CYTOPLASMIC_DOMAIN (PHOBIUS); CYTOPLASMIC_DOMAIN (PHOBIUS); SSF51735 (SUPERFAMILY)                                                                                                                                                                                                                                                                                                           |
| 1501 | 489258_length_1713_cvg_40.4_tip_1_1 | 357  | 46 kda fk506-binding nuclear protein                                    | 562 | 7.78E-47  | 73.40% | 0.248 | Coil (COILS); G3DSA:3.10.50.40 (GENE3D); IPR001179 (PFAM); IPR023566 (PANTHER); IPR001179 (PROSITE_PROFILES); IPR024057 (SUPERFAMILY); SSF54534 (SUPERFAMILY)                                                                                                                                                                                                                                                                                                                                                                                                        |

|      |                                     |       |                                                                  |     |           |        |       |                                                                                                                                                                                                                                                                                                                                                                                                                                                                                                                                                                                                                                                                                                                                                                                                                                                                                                                                   |
|------|-------------------------------------|-------|------------------------------------------------------------------|-----|-----------|--------|-------|-----------------------------------------------------------------------------------------------------------------------------------------------------------------------------------------------------------------------------------------------------------------------------------------------------------------------------------------------------------------------------------------------------------------------------------------------------------------------------------------------------------------------------------------------------------------------------------------------------------------------------------------------------------------------------------------------------------------------------------------------------------------------------------------------------------------------------------------------------------------------------------------------------------------------------------|
| 1488 | 488944_length_1691_cvg_61.4_tip_1_2 | 720   | protein tumorous imaginal mitochondrial-like isoform x2          | 563 | 0         | 75.10% | 0.199 | IPR001623 (PRINTS); IPR001623 (SMART); IPR001305 (G3DSA:2.10.230.GENE3D); IPR001305 (PFAM); IPR001623 (PFAM); IPR002939 (PFAM); G3DSA:2.60.260.20 (GENE3D); IPR001623 (G3DSA:1.10.287.GENE3D); PTHR24076 (PANTHER); PTHR24076:SF79 (PANTHER); IPR018253 (PROSITE_PATTERNS); IPR001623 (PROSITE_PROFILES); IPR012724 (HAMAP); IPR001305 (PROSITE_PROFILES); IPR001305 (SUPERFAMILY); IPR001623 (SUPERFAMILY); IPR008971 (SUPERFAMILY); IPR008971 (SUPERFAMILY)                                                                                                                                                                                                                                                                                                                                                                                                                                                                     |
| 1504 | 489370_length_1722_cvg_7.2_tip_1_1  | 90    | wd repeat-containing protein 3                                   | 565 | 0         | 78.20% | 0.114 | Coil (COILS); IPR020472 (PRINTS); IPR001680 (SMART); IPR001680 (PFAM); IPR015943 (G3DSA:2.130.10.GENE3D); IPR007148 (PFAM); PTHR19853 (PANTHER); PTHR19853:SF0 (PANTHER); IPR019775 (PROSITE_PATTERNS); IPR001680 (PROSITE_PROFILES); IPR001680 (PROSITE_PROFILES); IPR001680 (PROSITE_PROFILES); IPR017986 (PROSITE_PROFILES); IPR001680 (PROSITE_PROFILES); IPR017986 (SUPERFAMILY)                                                                                                                                                                                                                                                                                                                                                                                                                                                                                                                                             |
| 1489 | 489026_length_1698_cvg_4.7_tip_1_4  | 51    | centromeric protein                                              | 566 | 1.74E-103 | 66.60% | 0.276 | Coil (COILS); Coil (COILS); Coil (COILS); Coil (COILS); Coil (COILS); IPR027881 (PFAM); PTHR15742 (PANTHER); PTHR15742:SF0 (PANTHER)                                                                                                                                                                                                                                                                                                                                                                                                                                                                                                                                                                                                                                                                                                                                                                                              |
| 1490 | 489042_length_1699_cvg_6.2_tip_1_2  | 40    | guanine nucleotide-binding protein g g subunit beta-1 isoform x1 | 566 | 0         | 98.40% | 0.159 | IPR001632 (PRINTS); IPR020472 (PRINTS); IPR001680 (SMART); IPR001680 (PFAM); IPR015943 (G3DSA:2.130.10.GENE3D); IPR016346 (PANTHER); IPR019775 (PROSITE_PATTERNS); IPR019775 (PROSITE_PATTERNS); IPR019775 (PROSITE_PATTERNS); IPR019775 (PROSITE_PATTERNS); TRANSMEMBRANE (PHOBIUS); TRANSMEMBRANE (PHOBIUS); NON_CYTOPLASMIC_DOMAIN (PHOBIUS); NON_CYTOPLASMIC_DOMAIN (PHOBIUS); CYTOPLASMIC_DOMAIN (PHOBIUS); TRANSMEMBRANE (PHOBIUS); CYTOPLASMIC_DOMAIN (PHOBIUS); NON_CYTOPLASMIC_DOMAIN (PHOBIUS); TRANSMEMBRANE (PHOBIUS); IPR001680 (PROSITE_PROFILES); IPR017986 (PROSITE_PROFILES); IPR001680 (PROSITE_PROFILES); IPR001680 (PROSITE_PROFILES); IPR017986 (SUPERFAMILY); TMhelix (TMHMM); TMhelix (TMHMM); TMHMM); TMhelix (TMHMM) |
| 1515 | 489604_length_1739_cvg_68.2_tip_1_4 | 2297  | bola-like protein 2-like                                         | 566 | 1.16E-33  | 83.10% | 0.261 | IPR002634 (G3DSA:3.30.300.GENE3D); IPR002634 (PFAM); PTHR12735:SF2 (PANTHER); PTHR12735 (PANTHER); CYTOPLASMIC_DOMAIN (PHOBIUS); NON_CYTOPLASMIC_DOMAIN (PHOBIUS); CYTOPLASMIC_DOMAIN (PHOBIUS); TRANSMEMBRANE (PHOBIUS); TRANSMEMBRANE (PHOBIUS); TRANSMEMBRANE (PHOBIUS); NON_CYTOPLASMIC_DOMAIN (PHOBIUS); IPR002634 (SUPERFAMILY)                                                                                                                                                                                                                                                                                                                                                                                                                                                                                                                                                                                             |
| 1491 | 489048_length_1699_cvg_4.2_tip_1_3  | 40    | wee1-like protein kinase                                         | 567 | 0         | 74.30% | 0.257 | IPR002290 (SMART); IPR017164 (PIRSF); G3DSA:3.30.200.20 (GENE3D); G3DSA:1.10.510.10 (GENE3D); IPR000719 (PFAM); PTHR11042:SF69 (PANTHER); PTHR11042 (PANTHER); IPR008271 (PROSITE_PATTERNS); IPR017441 (PROSITE_PATTERNS); IPR000719 (PROSITE_PROFILES); IPR011009 (SUPERFAMILY)                                                                                                                                                                                                                                                                                                                                                                                                                                                                                                                                                                                                                                                  |
| 1492 | 489070_length_1700_cvg_74.4_tip_1_1 | 19098 | tissue factor pathway inhibitor 2                                | 567 | 3.91E-31  | 62.20% | 0.136 | Coil (COILS); IPR002223 (PRINTS); IPR002223 (SMART); IPR002223 (G3DSA:4.10.410.GENE3D); IPR002223 (G3DSA:4.10.410.GENE3D); IPR002223 (PFAM); PTHR10083 (PANTHER); IPR020901 (PROSITE_PATTERNS); IPR020901 (PROSITE_PATTERNS); NON_CYTOPLASMIC_DOMAIN (PHOBIUS); TRANSMEMBRANE (PHOBIUS); TRANSMEMBRANE (PHOBIUS); CYTOPLASMIC_DOMAIN (PHOBIUS); TRANSMEMBRANE (PHOBIUS); CYTOPLASMIC_DOMAIN (PHOBIUS); NON_CYTOPLASMIC_DOMAIN (PHOBIUS); CYTOPLASMIC_DOMAIN (PHOBIUS); IPR002223 (PROSITE_PROFILES); IPR002223 (PROSITE_PROFILES); IPR002223 (SUPERFAMILY); IPR002223 (SUPERFAMILY); TMhelix (TMHMM); TMhelix (TMHMM); TMhelix (TMHMM); TMhelix (TMHMM); TMhelix (TMHMM)                                                                                                                                                                                                                                                          |
| 1493 | 489096_length_1702_cvg_13.3_tip_1_4 | 104   | zinc finger protein 235-like                                     | 567 | 2.32E-28  | 43.50% | 0.099 | IPR015880 (SMART); PF13894 (PFAM); IPR013087 (G3DSA:3.30.160.GENE3D); IPR013087 (G3DSA:3.30.160.GENE3D); PF13465 (PFAM); IPR007087 (PFAM); PTHR24409 (PANTHER); PTHR24409:SF14 (PANTHER); IPR007087 (PROSITE_PATTERNS); IPR007087 (PROSITE_PATTERNS); IPR007087 (PROSITE_PATTERNS); IPR007087 (PROSITE_PATTERNS); IPR007087 (PROSITE_PROFILES); IPR007087 (PROSITE_PROFILES); IPR007087 (PROSITE_PROFILES); IPR007087 (PROSITE_PROFILES); IPR007087 (PROSITE_PROFILES); IPR007087 (PROSITE_PROFILES); SSF57667 (SUPERFAMILY); SSF57667 (SUPERFAMILY); SSF57667 (SUPERFAMILY)                                                                                                                                                                                                                                                                                                                                                      |
| 1494 | 489106_length_1703_cvg_8.6_tip_1_2  | 61    | low quality protein: selenoprotein h                             | 567 | 1.62E-18  | 63.70% | 0.102 | IPR020478 (PRINTS); IPR017956 (SMART); IPR011893 (PFAM); IPR011893 (TIGRFAM); IPR012336 (G3DSA:3.40.30.GENE3D); IPR017956 (PFAM); CYTOPLASMIC_DOMAIN (PHOBIUS); NON_CYTOPLASMIC_DOMAIN (PHOBIUS); TRANSMEMBRANE (PHOBIUS); IPR012336 (SUPERFAMILY); TMhelix (TMHMM)                                                                                                                                                                                                                                                                                                                                                                                                                                                                                                                                                                                                                                                               |



|      |                                     |      |                                                                                                                                                                                                                                                                                                                                                                                                                                                                                                                                                      |     |           |        |         |                                                                                                                                                                                                                                                                                                                                                                                                                                                                                                                                                                                                              |
|------|-------------------------------------|------|------------------------------------------------------------------------------------------------------------------------------------------------------------------------------------------------------------------------------------------------------------------------------------------------------------------------------------------------------------------------------------------------------------------------------------------------------------------------------------------------------------------------------------------------------|-----|-----------|--------|---------|--------------------------------------------------------------------------------------------------------------------------------------------------------------------------------------------------------------------------------------------------------------------------------------------------------------------------------------------------------------------------------------------------------------------------------------------------------------------------------------------------------------------------------------------------------------------------------------------------------------|
| 1506 | 489406_length_1724_cvg_64.9_tip_1_5 | 835  | di-n-acetylchitinase                                                                                                                                                                                                                                                                                                                                                                                                                                                                                                                                 | 574 | 5.24E-114 | 63.10% | 0.469 Y | IPR011583 (SMART); IPR013781 (G3DSA:3.20.20.GENE3D); IPR001223 (PFAM); PTHR11177:SF146 (PANTHER); PTHR11177 (PANTHER); NON_CYTOPLASMIC_DOMAIN (PHOBIUS); SIGNAL_PEPTIDE_H_REGION (PHOBIUS); SIGNAL_PEPTIDE_N_REGION (PHOBIUS); SIGNAL_PEPTIDE_C_REGION (PHOBIUS); SIGNAL_PEPTIDE (PHOBIUS); IPR017853 (SUPERFAMILY); TMhelix (TMHMM)                                                                                                                                                                                                                                                                         |
| 1505 | 489386_length_1723_cvg_13.0_tip_1_0 | 82   | apolipoprotein d-like                                                                                                                                                                                                                                                                                                                                                                                                                                                                                                                                | 575 | 1.43E-57  | 62.20% | 0.127   | IPR003057 (PRINTS); IPR000566 (PFAM); IPR012674 (G3DSA:2.40.128.GENE3D); PTHR10612:SF7 (PANTHER); PTHR10612 (PANTHER); IPR022272 (PROSITE_PATTERNS); CYTOPLASMIC_DOMAIN (PHOBIUS); TRANSMEMBRANE (PHOBIUS); NON_CYTOPLASMIC_DOMAIN (PHOBIUS); IPR011038 (SUPERFAMILY); TMhelix (TMHMM)                                                                                                                                                                                                                                                                                                                       |
| 1507 | 489412_length_1725_cvg_3.8_tip_1_0  | 51   | fmrf_musdo<br>ame: full=fmrfamide neuropeptides<br>contains: ame: full= amide-2 contains: ame: full= amide-3 contains: ame: full= amide-4 contains: ame: full= amide-5 contains: ame: full= amide-6 contains: ame: full= amide-7 contains: ame: full= amide-8 ame: full= amide-10 contains: ame: full= amide-9 ame: full= amide-11 ame: full= amide-12 ame: full= amide-13 contains: ame: full= amide-14 contains: ame: full= amide-15 contains: ame: full= amide-17 contains: ame: full= amide-16 contains: ame: full= amide-18<br>flags: precursor | 575 | 1.65E-19  | 58.10% | 0.609 Y | IPR002544 (PFAM); PTHR20986 (PANTHER); PTHR20986:SF1 (PANTHER); TRANSMEMBRANE (PHOBIUS); SIGNAL_PEPTIDE_C_REGION (PHOBIUS); NON_CYTOPLASMIC_DOMAIN (PHOBIUS); SIGNAL_PEPTIDE (PHOBIUS); SIGNAL_PEPTIDE_N_REGION (PHOBIUS); SIGNAL_PEPTIDE_H_REGION (PHOBIUS); NON_CYTOPLASMIC_DOMAIN (PHOBIUS); CYTOPLASMIC_DOMAIN (PHOBIUS); TRANSMEMBRANE (PHOBIUS); SignalP-noTM (SIGNALP_EUK)                                                                                                                                                                                                                            |
| 1508 | 489444_length_1727_cvg_8.3_tip_1_5  | 90   | integrin-linked protein kinase                                                                                                                                                                                                                                                                                                                                                                                                                                                                                                                       | 575 | 0         | 87.10% | 0.236   | IPR002110 (SMART); IPR020683 (G3DSA:1.25.40.GENE3D); IPR016253 (PIRSF); G3DSA:1.10.510.10 (GENE3D); IPR002110 (PFAM); IPR020683 (PFAM); IPR001245 (PFAM); G3DSA:3.30.200.20 (GENE3D); PTHR23257:SF30 (PANTHER); PTHR23257 (PANTHER); NON_CYTOPLASMIC_DOMAIN (PHOBIUS); TRANSMEMBRANE (PHOBIUS); CYTOPLASMIC_DOMAIN (PHOBIUS); IPR020683 (PROSITE_PROFILES); IPR002110 (PROSITE_PROFILES); IPR000719 (PROSITE_PROFILES); IPR002110 (PROSITE_PROFILES); IPR002110 (PROSITE_PROFILES); IPR020683 (SUPERFAMILY); IPR011009 (SUPERFAMILY); TMhelix (TMHMM)                                                        |
| 1509 | 489474_length_1729_cvg_3.0_tip_1_5  | 24   | von willebrand factor like 1                                                                                                                                                                                                                                                                                                                                                                                                                                                                                                                         | 576 | 1.07E-20  | 39.50% | 0.102   | IPR001007 (PROSITE_PATTERNS); PD968187 (PRODOM); IPR001007 (PROSITE_PROFILES); IPR002919 (SUPERFAMILY)                                                                                                                                                                                                                                                                                                                                                                                                                                                                                                       |
| 1511 | 489504_length_1732_cvg_5.9_tip_1_2  | 54   | ---NA---                                                                                                                                                                                                                                                                                                                                                                                                                                                                                                                                             | 577 |           |        | 0.12    | IPR002350 (SMART); IPR002350 (PFAM); G3DSA:3.30.60.30 (GENE3D); NON_CYTOPLASMIC_DOMAIN (PHOBIUS); TRANSMEMBRANE (PHOBIUS); CYTOPLASMIC_DOMAIN (PHOBIUS); TRANSMEMBRANE (PHOBIUS); NON_CYTOPLASMIC_DOMAIN (PHOBIUS); IPR002350 (PROSITE_PROFILES); SSF100895 (SUPERFAMILY); TMhelix (TMHMM); TMhelix (TMHMM)                                                                                                                                                                                                                                                                                                  |
| 1520 | 489852_length_1756_cvg_60.5_tip_1_5 | 1153 | serine protease easter-like                                                                                                                                                                                                                                                                                                                                                                                                                                                                                                                          | 577 | 1.62E-71  | 54.70% | 0.217   | IPR001314 (PRINTS); IPR006604 (SMART); IPR001254 (SMART); IPR022700 (PFAM); IPR001254 (PFAM); G3DSA:2.40.10.10 (GENE3D); G3DSA:2.40.10.10 (GENE3D); G3DSA:2.40.10.10 (GENE3D); PTHR24260 (PANTHER); PTHR24260:SF3 (PANTHER); IPR018114 (PROSITE_PATTERNS); IPR018114 (PROSITE_PATTERNS); NON_CYTOPLASMIC_DOMAIN (PHOBIUS); NON_CYTOPLASMIC_DOMAIN (PHOBIUS); CYTOPLASMIC_DOMAIN (PHOBIUS); TRANSMEMBRANE (PHOBIUS); CYTOPLASMIC_DOMAIN (PHOBIUS); TRANSMEMBRANE (PHOBIUS); TRANSMEMBRANE (PHOBIUS); IPR001254 (PROSITE_PROFILES); IPR009003 (SUPERFAMILY); TMhelix (TMHMM); TMhelix (TMHMM); TMhelix (TMHMM) |
| 1539 | 490204_length_1781_cvg_68.8_tip_1_5 | 6700 | cathepsin b                                                                                                                                                                                                                                                                                                                                                                                                                                                                                                                                          | 577 | 4.14E-164 | 78.80% | 0.13    | IPR000668 (PRINTS); IPR000668 (SMART); IPR012599 (PFAM); IPR000668 (PFAM); G3DSA:3.90.70.10 (GENE3D); IPR015643 (PTHR12411:PANTHER); IPR013128 (PANTHER); IPR025661 (PROSITE_PATTERNS); IPR025660 (PROSITE_PATTERNS); IPR000169 (PROSITE_PATTERNS); CYTOPLASMIC_DOMAIN (PHOBIUS); TRANSMEMBRANE (PHOBIUS); NON_CYTOPLASMIC_DOMAIN (PHOBIUS); CYTOPLASMIC_DOMAIN (PHOBIUS); TRANSMEMBRANE (PHOBIUS); SSF54001 (SUPERFAMILY); TMhelix (TMHMM); TMhelix (TMHMM)                                                                                                                                                 |





|      |                                     |     |                                                            |     |           |        |       |                                                                                                                                                                                                                                                                                                                                                                                                                                                                |
|------|-------------------------------------|-----|------------------------------------------------------------|-----|-----------|--------|-------|----------------------------------------------------------------------------------------------------------------------------------------------------------------------------------------------------------------------------------------------------------------------------------------------------------------------------------------------------------------------------------------------------------------------------------------------------------------|
| 1523 | 489904_length_1760_cvg_25.2_tip_1_5 | 162 | wd repeat-containing protein 61                            | 586 | 1.16E-139 | 87.30% | 0.103 | IPR001680 (SMART); IPR001680 (PFAM); IPR015943 (G3DSA:2.130.10.GENE3D); PTHR22841 (PANTHER); CYTOPLASMIC_DOMAIN (PHOBIUS); TRANSMEMBRANE (PHOBIUS); NON_CYTOPLASMIC_DOMAIN (PHOBIUS); IPR001680 (PROSITE_PROFILES); IPR001680 (PROSITE_PROFILES); IPR017986 (PROSITE_PROFILES); IPR001680 (PROSITE_PROFILES); IPR001680 (PROSITE_PROFILES); IPR001680 (PROSITE_PROFILES); IPR017986 (SUPERFAMILY); TMhelix (TMHMM)                                             |
| 1528 | 490034_length_1768_cvg_5.4_tip_1_4  | 59  | multiple inositol polyphosphate phosphatase 1              | 586 | 1.23E-71  | 59.50% | 0.202 | IPR029033 (G3DSA:3.40.50.GENE3D); IPR000560 (PFAM); PTHR20963 (PANTHER); PTHR20963:SF8 (PANTHER); TRANSMEMBRANE (PHOBIUS); TRANSMEMBRANE (PHOBIUS); CYTOPLASMIC_DOMAIN (PHOBIUS); NON_CYTOPLASMIC_DOMAIN (PHOBIUS); TRANSMEMBRANE (PHOBIUS); NON_CYTOPLASMIC_DOMAIN (PHOBIUS); CYTOPLASMIC_DOMAIN (PHOBIUS); IPR029033 (SUPERFAMILY); TMhelix (TMHMM); TMhelix (TMHMM)                                                                                         |
| 1524 | 489922_length_1761_cvg_17.3_tip_1_2 | 154 | von willebrand domain-containing protein                   | 587 | 1.16E-120 | 54.40% | 0.241 | IPR002035 (G3DSA:3.40.50.GENE3D); PF13768 (PFAM); PTHR10338 (PANTHER); PTHR10338:SF95 (PANTHER); IPR002035 (PROSITE_PROFILES); IPR002035 (SUPERFAMILY)                                                                                                                                                                                                                                                                                                         |
| 1525 | 489930_length_1761_cvg_29.6_tip_1_0 | 231 | factor d-like protein                                      | 587 | 2.01E-79  | 50.70% | 0.108 | IPR001314 (PRINTS); IPR001254 (SMART); IPR001254 (PFAM); G3DSA:2.40.10.10 (GENE3D); G3DSA:2.40.10.10 (GENE3D); G3DSA:2.40.10.10 (GENE3D); PTHR24268:SF95 (PANTHER); PTHR24268 (PANTHER); IPR018114 (PROSITE_PATTERNS); IPR001254 (PROSITE_PROFILES); IPR009003 (SUPERFAMILY)                                                                                                                                                                                   |
| 1543 | 490318_length_1790_cvg_61.0_tip_1_2 | 713 | atpase family aaa domain-containing protein 1-b            | 588 | 1.68E-164 | 77.60% | 0.122 | IPR003593 (SMART); G3DSA:1.10.8.60 (GENE3D); IPR027417 (G3DSA:3.40.50.GENE3D); IPR003959 (PFAM); PTHR23074 (PANTHER); PTHR23074:SF20 (PANTHER); IPR003960 (PROSITE_PATTERNS); CYTOPLASMIC_DOMAIN (PHOBIUS); NON_CYTOPLASMIC_DOMAIN (PHOBIUS); TRANSMEMBRANE (PHOBIUS); TRANSMEMBRANE (PHOBIUS); NON_CYTOPLASMIC_DOMAIN (PHOBIUS); TRANSMEMBRANE (PHOBIUS); CYTOPLASMIC_DOMAIN (PHOBIUS); IPR027417 (SUPERFAMILY)                                               |
| 1526 | 490004_length_1766_cvg_10.6_tip_1_0 | 78  | von willebrand domain-containing protein                   | 589 | 5.18E-90  | 61.20% | 0.099 | Coil (COILS); IPR013694 (SMART); IPR013694 (PFAM); PTHR10338 (PANTHER); PTHR10338:SF95 (PANTHER); NON_CYTOPLASMIC_DOMAIN (PHOBIUS); NON_CYTOPLASMIC_DOMAIN (PHOBIUS); CYTOPLASMIC_DOMAIN (PHOBIUS); TRANSMEMBRANE (PHOBIUS); TRANSMEMBRANE (PHOBIUS); CYTOPLASMIC_DOMAIN (PHOBIUS); CYTOPLASMIC_DOMAIN (PHOBIUS); TRANSMEMBRANE (PHOBIUS); TRANSMEMBRANE (PHOBIUS); IPR013694 (PROSITE_PROFILES); IPR002035 (SUPERFAMILY); TMhelix (TMHMM); TMhelix (TMHMM)    |
| 1527 | 490022_length_1767_cvg_56.8_tip_1_3 | 493 | golgi-associated plant pathogenesis-related protein 1      | 589 | 2.39E-157 | 62.40% | 0.103 | IPR001283 (PRINTS); IPR014044 (SMART); IPR014044 (PFAM); IPR014044 (G3DSA:3.40.33.GENE3D); PTHR10334:SF189 (PANTHER); IPR001283 (PANTHER); IPR018244 (PROSITE_PATTERNS); IPR018244 (PROSITE_PATTERNS); IPR014044 (SUPERFAMILY); IPR014044 (SUPERFAMILY)                                                                                                                                                                                                        |
| 1545 | 490388_length_1795_cvg_9.4_tip_1_1  | 87  | peptidyl-alpha-hydroxyglycine alpha-amidating lyase 2-like | 590 | 1.18E-109 | 60.50% | 0.208 | IPR000720 (PRINTS); IPR011042 (G3DSA:2.120.10.GENE3D); IPR001258 (PFAM); PTHR10680 (PANTHER); IPR013017 (PROSITE_PROFILES); IPR013017 (PROSITE_PROFILES); IPR013017 (PROSITE_PROFILES); SSF101898 (SUPERFAMILY)                                                                                                                                                                                                                                                |
| 1549 | 490454_length_1798_cvg_50.8_tip_1_3 | 517 | prophenoloxidase activating factor                         | 590 | 2.15E-131 | 65.60% | 0.106 | IPR001314 (PRINTS); IPR001254 (SMART); IPR001254 (PFAM); G3DSA:2.40.10.10 (GENE3D); G3DSA:2.40.10.10 (GENE3D); G3DSA:2.40.10.10 (GENE3D); PTHR24268 (PANTHER); PTHR24268:SF95 (PANTHER); IPR018114 (PROSITE_PATTERNS); TRANSMEMBRANE (PHOBIUS); CYTOPLASMIC_DOMAIN (PHOBIUS); TRANSMEMBRANE (PHOBIUS); NON_CYTOPLASMIC_DOMAIN (PHOBIUS); CYTOPLASMIC_DOMAIN (PHOBIUS); IPR001254 (PROSITE_PROFILES); IPR009003 (SUPERFAMILY); TMhelix (TMHMM); TMhelix (TMHMM) |



|      |                                     |     |                                                                  |     |          |        |       |                                                                                                                                                                                                                                                                                                                                                                                                                                                                                                                                                                                                                                                                                                                                                                                                                                                                                                                           |
|------|-------------------------------------|-----|------------------------------------------------------------------|-----|----------|--------|-------|---------------------------------------------------------------------------------------------------------------------------------------------------------------------------------------------------------------------------------------------------------------------------------------------------------------------------------------------------------------------------------------------------------------------------------------------------------------------------------------------------------------------------------------------------------------------------------------------------------------------------------------------------------------------------------------------------------------------------------------------------------------------------------------------------------------------------------------------------------------------------------------------------------------------------|
| 1534 | 490114_length_1775_cvg_2.3_tip_1_1  | 20  | zinc finger protein 37-like                                      | 592 | 6.09E-19 | 52.10% | 0.101 | IPR015880 (SMART); PF13894 (PFAM); IPR013087 (G3DSA:3.30.160.GENE3D); IPR013087 (G3DSA:3.30.160.GENE3D); IPR013087 (G3DSA:3.30.160.GENE3D); PF13465 (PFAM); PTHR24409 (PANTHER); IPR007087 (PROSITE_PATTERNS); IPR007087 (PROSITE_PATTERNS); IPR007087 (PROSITE_PATTERNS); IPR007087 (PROSITE_PATTERNS); IPR007087 (PROSITE_PROFILES); IPR007087 (PROSITE_PROFILES); IPR007087 (PROSITE_PROFILES); SSF57667 (SUPERFAMILY); SSF57667 (SUPERFAMILY);                                                                                                                                                                                                                                                                                                                                                                                                                                                                        |
| 1548 | 490430_length_1797_cvg_38.0_tip_1_3 | 394 | superoxide dismutase                                             | 592 | 8.81E-62 | 68.70% | 0.203 | IPR001424 (PRINTS); IPR001424 (G3DSA:2.60.40.GENE3D); IPR001424 (G3DSA:2.60.40.GENE3D); IPR001424 (PFAM); PTHR10003 (PANTHER); IPR018152 (PROSITE_PATTERNS); IPR018152 (PROSITE_PATTERNS); NON_CYTOPLASMIC_DOMAIN (PHOBIUS); TRANSMEMBRANE (PHOBIUS); CYTOPLASMIC_DOMAIN (PHOBIUS); IPR001424 (SUPERFAMILY); IPR001424 (SUPERFAMILY); TMhelix (TMHMM)                                                                                                                                                                                                                                                                                                                                                                                                                                                                                                                                                                     |
| 1536 | 490156_length_1778_cvg_4.0_tip_1_1  | 39  | fez family zinc finger protein 2                                 | 593 | 0        | 80.10% | 0.103 | Coil (COILS); IPR015880 (SMART); IPR007087 (PFAM); IPR013087 (G3DSA:3.30.160.GENE3D); PF13912 (PFAM); IPR013087 (G3DSA:3.30.160.GENE3D); PF13465 (PFAM); IPR013087 (G3DSA:3.30.160.GENE3D); PTHR24409 (PANTHER); IPR007087 (PROSITE_PATTERNS); IPR007087 (PROSITE_PATTERNS); IPR007087 (PROSITE_PATTERNS); IPR007087 (PROSITE_PATTERNS); IPR007087 (PROSITE_PATTERNS); IPR007087 (PROSITE_PROFILES); IPR007087 (PROSITE_PROFILES); IPR007087 (PROSITE_PROFILES); IPR007087 (PROSITE_PROFILES); IPR007087 (PROSITE_PROFILES); SSF57667 (SUPERFAMILY); SSF57667 (SUPERFAMILY); SSF57667 (SUPERFAMILY)                                                                                                                                                                                                                                                                                                                       |
| 1537 | 490162_length_1778_cvg_4.1_tip_1_4  | 28  | cgmp-dependent protein isozyme 2 forms cd4 t1 t3a t3b isoform x2 | 593 | 0        | 90.20% | 0.105 | Coil (COILS); IPR002374 (PRINTS); IPR002290 (SMART); IPR000595 (SMART); G3DSA:1.10.510.10 (GENE3D); IPR000595 (PFAM); IPR000719 (PFAM); IPR014710 (G3DSA:2.60.120.GENE3D); IPR002374 (PIRSF); IPR014710 (G3DSA:2.60.120.GENE3D); G3DSA:3.30.200.20 (GENE3D); PTHR24353:SF65 (PANTHER); PTHR24353 (PANTHER); IPR017441 (PROSITE_PATTERNS); IPR008271 (PROSITE_PATTERNS); IPR018488 (PROSITE_PATTERNS); IPR018488 (PROSITE_PATTERNS); IPR018488 (PROSITE_PATTERNS); IPR000719 (PROSITE_PROFILES); IPR000595 (PROSITE_PROFILES); IPR000595 (PROSITE_PROFILES); IPR011009 (SUPERFAMILY); IPR018490 (SUPERFAMILY); IPR018490 (SUPERFAMILY)                                                                                                                                                                                                                                                                                     |
| 1538 | 490178_length_1779_cvg_5.5_tip_1_4  | 46  | cation channel sperm-associated protein 2                        | 593 | 1.56E-72 | 54.60% | 0.132 | Coil (COILS); IPR005821 (PFAM); IPR027359 (G3DSA:1.20.120.GENE3D); PTHR10037 (PANTHER); IPR028747 (PTHR10037:PANTHER); NON_CYTOPLASMIC_DOMAIN (PHOBIUS); TRANSMEMBRANE (PHOBIUS); TRANSMEMBRANE (PHOBIUS); NON_CYTOPLASMIC_DOMAIN (PHOBIUS); CYTOPLASMIC_DOMAIN (PHOBIUS); CYTOPLASMIC_DOMAIN (PHOBIUS); TRANSMEMBRANE (PHOBIUS); TRANSMEMBRANE (PHOBIUS); TRANSMEMBRANE (PHOBIUS); CYTOPLASMIC_DOMAIN (PHOBIUS); TRANSMEMBRANE (PHOBIUS); NON_CYTOPLASMIC_DOMAIN (PHOBIUS); CYTOPLASMIC_DOMAIN (PHOBIUS); SSF81324 (SUPERFAMILY); TMhelix (TMHMM); TMhelix (TMHMM); TMhelix (TMHMM); TMhelix (TMHMM)                                                                                                                                                                                                                                                                                                                     |
| 1553 | 490528_length_1803_cvg_19.4_tip_1_3 | 162 | zinc finger protein 37 homolog isoform x1                        | 593 | 2.31E-57 | 64.00% | 0.132 | IPR015880 (SMART); IPR000210 (SMART); IPR013087 (G3DSA:3.30.160.GENE3D); PF13465 (PFAM); IPR007087 (PFAM); IPR013087 (G3DSA:3.30.160.GENE3D); G3DSA:3.30.710.10 (GENE3D); IPR013087 (G3DSA:3.30.160.GENE3D); IPR013069 (PFAM); PTHR24409 (PANTHER); IPR007087 (PROSITE_PATTERNS); CYTOPLASMIC_DOMAIN (PHOBIUS); NON_CYTOPLASMIC_DOMAIN (PHOBIUS); TRANSMEMBRANE (PHOBIUS); IPR007087 (PROSITE_PROFILES); IPR007087 (PROSITE_PROFILES); IPR007087 (PROSITE_PROFILES); IPR007087 (PROSITE_PROFILES); IPR007087 (PROSITE_PROFILES); IPR000210 (PROSITE_PROFILES); IPR007087 (PROSITE_PROFILES); SSF57667 (SUPERFAMILY); SSF57667 (SUPERFAMILY); SSF57667 (SUPERFAMILY); IPR011333 (SUPERFAMILY); SSF57667 (SUPERFAMILY); TMhelix (TMHMM) |

|      |                                     |     |                                                          |     |           |        |       |                                                                                                                                                                                                                                                                                                                                                                                                                                                                                                                                                                                                                                                                                                     |
|------|-------------------------------------|-----|----------------------------------------------------------|-----|-----------|--------|-------|-----------------------------------------------------------------------------------------------------------------------------------------------------------------------------------------------------------------------------------------------------------------------------------------------------------------------------------------------------------------------------------------------------------------------------------------------------------------------------------------------------------------------------------------------------------------------------------------------------------------------------------------------------------------------------------------------------|
| 1565 | 491000_length_1841_cvg_9.8_tip_1_4  | 126 | puromycin-sensitive aminopeptidase                       | 593 | 3.49E-101 | 80.00% | 0.113 | Coil (COILS); IPR024571 (PFAM); IPR001930 (PANTHER); PTHR11533:SF163 (PANTHER); NON_CYTOPLASMIC_DOMAIN (PHOBIUS); TRANSMEMBRANE (PHOBIUS); CYTOPLASMIC_DOMAIN (PHOBIUS); TRANSMEMBRANE (PHOBIUS); NON_CYTOPLASMIC_DOMAIN (PHOBIUS); TMhelix (TMHMM); TMhelix (TMHMM); TMhelix (TMHMM)                                                                                                                                                                                                                                                                                                                                                                                                               |
| 1540 | 490220_length_1783_cvg_6.1_tip_1_5  | 53  | nitrilase and fragile histidine triad fusion protein hit | 594 | 0         | 69.50% | 0.112 | Coil (COILS); IPR003010 (G3DSA:3.60.110.GENE3D); IPR001310 (PFAM); IPR011146 (G3DSA:3.30.428.GENE3D); IPR003010 (PFAM); PTHR23088:SF5 (PANTHER); PTHR23088 (PANTHER); IPR019808 (PROSITE_PATTERNS); IPR001110 (PROSITE_PATTERNS); IPR011146 (PROSITE_PROFILES); IPR003010 (PROSITE_PROFILES); IPR003010 (SUPERFAMILY); IPR011146 (SUPERFAMILY)                                                                                                                                                                                                                                                                                                                                                      |
| 1541 | 490258_length_1785_cvg_21.6_tip_1_0 | 229 | villin-1-like isoform x2                                 | 595 | 0         | 66.30% | 0.1   | IPR007122 (PRINTS); IPR003128 (SMART); IPR007122 (SMART); IPR029006 (G3DSA:3.40.20.GENE3D); IPR029006 (G3DSA:3.40.20.GENE3D); IPR007123 (PFAM); IPR029006 (G3DSA:3.40.20.GENE3D); IPR003128 (PFAM); IPR003128 (G3DSA:1.10.950.GENE3D); IPR029006 (G3DSA:3.40.20.GENE3D); IPR007122 (PANTHER); IPR003128 (PROSITE_PROFILES); SSF55753 (SUPERFAMILY); SSF55753 (SUPERFAMILY); SSF55753 (SUPERFAMILY); SSF82754 (SUPERFAMILY); IPR003128 (SUPERFAMILY)                                                                                                                                                                                                                                                 |
| 1552 | 490520_length_1803_cvg_23.2_tip_1_2 | 206 | lamin dm0-like isoform x1                                | 596 | 1.17E-170 | 74.40% | 0.148 | Coil (COILS); Coil (COILS); Coil (COILS); Coil (COILS); G3DSA:1.20.5.170 (GENE3D); IPR001322 (G3DSA:2.60.40.GENE3D); IPR001322 (PFAM); IPR001664 (PFAM); IPR027696 (PTHR23239:PANTHER); IPR001664 (PANTHER); IPR018039 (PROSITE_PATTERNS); SSF64593 (SUPERFAMILY); IPR001322 (SUPERFAMILY)                                                                                                                                                                                                                                                                                                                                                                                                          |
| 1544 | 490344_length_1791_cvg_57.0_tip_1_5 | 877 | n-acetylated-alpha-linked acidic dipeptidase             | 597 | 3.38E-143 | 59.60% | 0.136 | IPR007484 (PFAM); G3DSA:3.50.30.30 (GENE3D); IPR007365 (G3DSA:1.20.930.GENE3D); G3DSA:3.40.630.10 (GENE3D); IPR007365 (PFAM); PTHR10404 (PANTHER); TRANSMEMBRANE (PHOBIUS); CYTOPLASMIC_DOMAIN (PHOBIUS); NON_CYTOPLASMIC_DOMAIN (PHOBIUS); TRANSMEMBRANE (PHOBIUS); NON_CYTOPLASMIC_DOMAIN (PHOBIUS); SSF53187 (SUPERFAMILY); IPR007365 (SUPERFAMILY); SSF52025 (SUPERFAMILY)                                                                                                                                                                                                                                                                                                                      |
| 1546 | 490422_length_1797_cvg_17.8_tip_1_2 | 180 | acyl- delta desaturase                                   | 599 | 1.88E-128 | 72.50% | 0.304 | IPR015876 (PRINTS); IPR005804 (PFAM); PTHR11351 (PANTHER); PTHR11351:SF28 (PANTHER); TRANSMEMBRANE (PHOBIUS); CYTOPLASMIC_DOMAIN (PHOBIUS); TRANSMEMBRANE (PHOBIUS); TRANSMEMBRANE (PHOBIUS); TRANSMEMBRANE (PHOBIUS); TRANSMEMBRANE (PHOBIUS); TRANSMEMBRANE (PHOBIUS); TRANSMEMBRANE (PHOBIUS); NON_CYTOPLASMIC_DOMAIN (PHOBIUS); CYTOPLASMIC_DOMAIN (PHOBIUS); TRANSMEMBRANE (PHOBIUS); NON_CYTOPLASMIC_DOMAIN (PHOBIUS); CYTOPLASMIC_DOMAIN (PHOBIUS); NON_CYTOPLASMIC_DOMAIN (PHOBIUS); NON_CYTOPLASMIC_DOMAIN (PHOBIUS); CYTOPLASMIC_DOMAIN (PHOBIUS); TMhelix (TMHMM); TMhelix (TMHMM) |
| 1547 | 490426_length_1797_cvg_14.2_tip_1_1 | 118 | zinc finger protein                                      | 599 | 6.28E-32  | 53.10% | 0.134 | IPR015880 (SMART); IPR007087 (PFAM); PF13894 (PFAM); IPR013087 (G3DSA:3.30.160.GENE3D); IPR013087 (G3DSA:3.30.160.GENE3D); PF13465 (PFAM); PTHR24409:SF14 (PANTHER); PTHR24409 (PANTHER); IPR007087 (PROSITE_PATTERNS); IPR007087 (PROSITE_PATTERNS); IPR007087 (PROSITE_PATTERNS); IPR007087 (PROSITE_PATTERNS); IPR007087 (PROSITE_PATTERNS); IPR007087 (PROSITE_PATTERNS); TRANSMEMBRANE (PHOBIUS); CYTOPLASMIC_DOMAIN (PHOBIUS); NON_CYTOPLASMIC_DOMAIN (PHOBIUS); IPR007087 (PROSITE_PROFILES); IPR007087 (PROSITE_PROFILES); IPR007087 (PROSITE_PROFILES); IPR007087 (PROSITE_PROFILES); IPR007087 (PROSITE_PROFILES); SSF57667 (SUPERFAMILY); SSF57667 (SUPERFAMILY); SSF57667 (SUPERFAMILY) |
| 1559 | 490836_length_1826_cvg_28.3_tip_1_5 | 233 | c protein immunoglobulin-a-binding beta antigen          | 599 | 8.34E-33  | 56.40% | 0.298 | G3DSA:2.160.10.10 (GENE3D); TRANSMEMBRANE (PHOBIUS); CYTOPLASMIC_DOMAIN (PHOBIUS); NON_CYTOPLASMIC_DOMAIN (PHOBIUS); TRANSMEMBRANE (PHOBIUS); NON_CYTOPLASMIC_DOMAIN (PHOBIUS)                                                                                                                                                                                                                                                                                                                                                                                                                                                                                                                      |
| 1551 | 490470_length_1799_cvg_8.8_tip_1_1  | 96  | plexin domain-containing protein 2-like                  | 600 | 3.99E-117 | 70.40% | 0.335 | IPR016201 (SMART); G3DSA:3.30.1680.10 (GENE3D); PTHR13055 (PANTHER); PTHR13055:SF12 (PANTHER)                                                                                                                                                                                                                                                                                                                                                                                                                                                                                                                                                                                                       |
| 1554 | 490552_length_1805_cvg_2.2_tip_1_1  | 27  | hypothetical protein BRAFLDRAFT_125057                   | 602 | 3.29E-12  | 47.10% | 0.107 | no IPS match                                                                                                                                                                                                                                                                                                                                                                                                                                                                                                                                                                                                                                                                                        |







|      |                                     |     |                                                                   |     |           |        |         |                                                                                                                                                                                                                                                                                                                                                                                                                                                                                          |
|------|-------------------------------------|-----|-------------------------------------------------------------------|-----|-----------|--------|---------|------------------------------------------------------------------------------------------------------------------------------------------------------------------------------------------------------------------------------------------------------------------------------------------------------------------------------------------------------------------------------------------------------------------------------------------------------------------------------------------|
| 1568 | 491080_length_1847_cvg_3.9_tip_1_5  | 38  | chitinase 1 precursor                                             | 615 | 0         | 70.50% | 0.128   | IPR002557 (SMART); IPR011583 (SMART); IPR002557 (G3DSA:2.170.140.GENE3D); IPR029070 (G3DSA:3.10.50.GENE3D); IPR013781 (G3DSA:3.20.20.GENE3D); IPR001223 (PFAM); IPR002557 (PFAM); PTHR11177 (PANTHER); PTHR11177:SF144 (PANTHER); IPR002557 (PROSITE_PROFILES); IPR017853 (SUPERFAMILY); IPR029070 (SUPERFAMILY); IPR002557 (SUPERFAMILY)                                                                                                                                                |
| 1583 | 491356_length_1872_cvg_15.8_tip_1_1 | 174 | a disintegrin and metalloproteinase with thrombospondin motifs 18 | 615 | 1.58E-60  | 55.10% | 0.112   | IPR006586 (SMART); IPR001590 (PFAM); IPR024079 (G3DSA:3.40.390.GENE3D); PTHR13723 (PANTHER); IPR001590 (PROSITE_PROFILES); SSF55486 (SUPERFAMILY)                                                                                                                                                                                                                                                                                                                                        |
| 1569 | 491124_length_1851_cvg_14.5_tip_1_2 | 135 | rna-binding protein 5-like                                        | 617 | 4.61E-151 | 64.90% | 0.106   | Coil (COILS); IPR000467 (SMART); IPR000467 (PFAM); PTHR13948 (PANTHER); IPR000467 (PROSITE_PROFILES); IPR007087 (PROSITE_PROFILES)                                                                                                                                                                                                                                                                                                                                                       |
| 1570 | 491130_length_1852_cvg_12.4_tip_1_4 | 101 | secreted frizzled-related protein 3                               | 617 | 1.01E-78  | 59.70% | 0.254   | Coil (COILS); IPR020067 (SMART); IPR018933 (SMART); G3DSA:2.40.50.120 (GENE3D); IPR020067 (PFAM); IPR020067 (G3DSA:1.10.2000.GENE3D); IPR018933 (PFAM); PTHR11309:SF83 (PANTHER); IPR015526 (PANTHER); SIGNAL_PEPTIDE_H_REGION (PHOBIUS); SIGNAL_PEPTIDE_N_REGION (PHOBIUS); SIGNAL_PEPTIDE_C_REGION (PHOBIUS); SIGNAL_PEPTIDE (PHOBIUS); NON_CYTOPLASMIC_DOMAIN (PHOBIUS); IPR020067 (PROSITE_PROFILES); IPR001134 (PROSITE_PROFILES); IPR008993 (SUPERFAMILY); IPR020067 (SUPERFAMILY) |
| 1571 | 491144_length_1852_cvg_5.1_tip_1_4  | 58  | flavin-containing monooxygenase fmo gs-ox3                        | 617 | 2.52E-141 | 64.30% | 0.273   | IPR000960 (PRINTS); G3DSA:3.50.50.60 (GENE3D); G3DSA:3.50.50.60 (GENE3D); IPR020946 (PFAM); PTHR23023 (PANTHER); PTHR23023:SF4 (PANTHER); SSF51905 (SUPERFAMILY); SSF51905 (SUPERFAMILY)                                                                                                                                                                                                                                                                                                 |
| 1579 | 491274_length_1864_cvg_57.3_tip_1_3 | 812 | tribbles homolog 2                                                | 617 | 1.53E-121 | 71.70% | 0.11    | IPR002290 (SMART); IPR000719 (PFAM); G3DSA:3.30.200.20 (GENE3D); G3DSA:1.10.510.10 (GENE3D); PTHR22961:SF4 (PANTHER); IPR024104 (PANTHER); CYTOPLASMIC_DOMAIN (PHOBIUS); NON_CYTOPLASMIC_DOMAIN (PHOBIUS); TRANSMEMBRANE (PHOBIUS); IPR000719 (PROSITE_PROFILES); IPR011009 (SUPERFAMILY)                                                                                                                                                                                                |
| 1573 | 491178_length_1855_cvg_5.5_tip_1_3  | 47  | dual specificity mitogen-activated protein kinase kinase 4-like   | 619 | 0         | 89.90% | 0.117   | IPR002290 (SMART); G3DSA:3.30.200.20 (GENE3D); IPR000719 (PFAM); G3DSA:1.10.510.10 (GENE3D); PTHR24360:SF46 (PANTHER); PTHR24360 (PANTHER); IPR008271 (PROSITE_PATTERNS); IPR017441 (PROSITE_PATTERNS); IPR000719 (PROSITE_PROFILES); IPR011009 (SUPERFAMILY)                                                                                                                                                                                                                            |
| 1574 | 491208_length_1857_cvg_8.9_tip_1_4  | 104 | scp-like extracellular domain containing protein 1                | 619 | 1.91E-69  | 60.30% | 0.237   | IPR002413 (PRINTS); IPR001283 (PRINTS); IPR014044 (SMART); IPR014044 (G3DSA:3.40.33.GENE3D); IPR014044 (PFAM); PTHR10334:SF174 (PANTHER); IPR001283 (PANTHER); IPR018244 (PROSITE_PATTERNS); IPR018244 (PROSITE_PATTERNS); NON_CYTOPLASMIC_DOMAIN (PHOBIUS); TRANSMEMBRANE (PHOBIUS); TRANSMEMBRANE (PHOBIUS); NON_CYTOPLASMIC_DOMAIN (PHOBIUS); CYTOPLASMIC_DOMAIN (PHOBIUS); IPR000998 (PROSITE_PROFILES); IPR013320 (SUPERFAMILY); IPR014044 (SUPERFAMILY); TMhelix (TMHMM)           |
| 1576 | 491210_length_1858_cvg_7.9_tip_1_2  | 79  | #NAME?                                                            | 619 | 5.14E-46  | 71.60% | 0.215   | IPR001830 (PFAM); G3DSA:3.40.50.2000 (GENE3D); PTHR10788:SF6 (PANTHER); PTHR10788 (PANTHER); TRANSMEMBRANE (PHOBIUS); NON_CYTOPLASMIC_DOMAIN (PHOBIUS); CYTOPLASMIC_DOMAIN (PHOBIUS); NON_CYTOPLASMIC_DOMAIN (PHOBIUS); TRANSMEMBRANE (PHOBIUS); TRANSMEMBRANE (PHOBIUS); CYTOPLASMIC_DOMAIN (PHOBIUS); CYTOPLASMIC_DOMAIN (PHOBIUS); SSF53756 (SUPERFAMILY); TMhelix (TMHMM); TMhelix (TMHMM); TMhelix (TMHMM)                                                                          |
| 1575 | 491210_length_1858_cvg_7.9_tip_1_0  | 79  | trehalose 6-phosphate synthase 1                                  | 620 | 4.53E-28  | 68.90% | 0.364 Y | IPR001830 (PFAM); G3DSA:3.40.50.2000 (GENE3D); G3DSA:3.40.50.2000 (GENE3D); PTHR10788:SF6 (PANTHER); PTHR10788 (PANTHER); SIGNAL_PEPTIDE_N_REGION (PHOBIUS); NON_CYTOPLASMIC_DOMAIN (PHOBIUS); SIGNAL_PEPTIDE_C_REGION (PHOBIUS); SIGNAL_PEPTIDE (PHOBIUS); SIGNAL_PEPTIDE_H_REGION (PHOBIUS); SSF53756 (SUPERFAMILY)                                                                                                                                                                    |
| 1593 | 491566_length_1895_cvg_10.1_tip_1_5 | 84  | transposable element tcb1 partial                                 | 621 | 6.00E-25  | 60.70% | 0.122   | IPR002172 (PRINTS); IPR002172 (SMART); IPR002172 (G3DSA:4.10.400.GENE3D); IPR002172 (PFAM); IPR002172 (G3DSA:4.10.400.GENE3D); PTHR10529 (PANTHER); IPR023415 (PROSITE_PATTERNS); IPR023415 (PROSITE_PATTERNS); IPR002172 (PROSITE_PROFILES); IPR002172 (PROSITE_PROFILES); IPR002172 (SUPERFAMILY); IPR002172 (SUPERFAMILY)                                                                                                                                                             |

|      |                                     |        |                                                 |     |           |        |       |                                                                                                                                                                                                                                                                                                                                                                                                                                                                                                                                        |
|------|-------------------------------------|--------|-------------------------------------------------|-----|-----------|--------|-------|----------------------------------------------------------------------------------------------------------------------------------------------------------------------------------------------------------------------------------------------------------------------------------------------------------------------------------------------------------------------------------------------------------------------------------------------------------------------------------------------------------------------------------------|
| 1595 | 491592_length_1897_cvg_31.6_tip_1_2 | 271    | low quality protein: hemocytin-like             | 621 | 4.77E-75  | 53.50% | 0.114 | IPR006207 (SMART); IPR006208 (PFAM); PTHR11339:SF229 (PANTHER); PTHR11339 (PANTHER); TRANSMEMBRANE (PHOBIUS); CYTOPLASMIC_DOMAIN (PHOBIUS); NON_CYTOPLASMIC_DOMAIN (PHOBIUS); NON_CYTOPLASMIC_DOMAIN (PHOBIUS); TRANSMEMBRANE (PHOBIUS); CYTOPLASMIC_DOMAIN (PHOBIUS); TRANSMEMBRANE (PHOBIUS); TRANSMEMBRANE (PHOBIUS); IPR006207 (PROSITE_PROFILES); SSF57603 (SUPERFAMILY); SSF57603 (SUPERFAMILY)                                                                                                                                  |
| 1580 | 491326_length_1869_cvg_6.1_tip_1_5  | 51     | insulin-degrading enzyme                        | 623 | 2.93E-178 | 72.80% | 0.113 | IPR007863 (PFAM); IPR011237 (G3DSA:3.30.830.GENE3D); IPR011237 (G3DSA:3.30.830.GENE3D); PTHR11851:SF85 (PANTHER); PTHR11851 (PANTHER); IPR011249 (SUPERFAMILY); IPR011249 (SUPERFAMILY)                                                                                                                                                                                                                                                                                                                                                |
| 1581 | 491342_length_1871_cvg_27.1_tip_1_4 | 453904 | suppressor of tumorigenicity 14 protein         | 624 | 2.70E-51  | 52.30% | 0.126 | IPR001314 (PRINTS); IPR002172 (SMART); IPR001254 (SMART); IPR002172 (PFAM); G3DSA:2.40.10.10 (GENE3D); IPR001254 (PFAM); IPR002172 (G3DSA:4.10.400.GENE3D); G3DSA:2.40.10.10 (GENE3D); G3DSA:2.40.10.10 (GENE3D); PTHR24256 (PANTHER); IPR018114 (PROSITE_PATTERNS); IPR018114 (PROSITE_PATTERNS); IPR023415 (PROSITE_PATTERNS); TRANSMEMBRANE (PHOBIUS); NON_CYTOPLASMIC_DOMAIN (PHOBIUS); CYTOPLASMIC_DOMAIN (PHOBIUS); IPR001254 (PROSITE_PROFILES); IPR002172 (PROSITE_PROFILES); IPR009003 (SUPERFAMILY); IPR002172 (SUPERFAMILY) |
| 1582 | 491352_length_1872_cvg_30.3_tip_1_1 | 311    | angiotensin-converting enzyme                   | 624 | 0         | 78.10% | 0.133 | IPR001548 (PRINTS); IPR001548 (PFAM); PTHR10514:SF17 (PANTHER); IPR001548 (PANTHER); TRANSMEMBRANE (PHOBIUS); CYTOPLASMIC_DOMAIN (PHOBIUS); NON_CYTOPLASMIC_DOMAIN (PHOBIUS); CYTOPLASMIC_DOMAIN (PHOBIUS); TRANSMEMBRANE (PHOBIUS); SSF55486 (SUPERFAMILY); TMhelix (TMHMM); TMhelix (TMHMM)                                                                                                                                                                                                                                          |
| 1596 | 491594_length_1897_cvg_41.0_tip_1_5 | 360    | probable cytochrome p450 49a1                   | 624 | 6.74E-137 | 60.50% | 0.146 | IPR002401 (PRINTS); IPR001128 (PRINTS); IPR001128 (G3DSA:1.10.630.GENE3D); IPR001128 (PFAM); PTHR24305 (PANTHER); PTHR24305:SF49 (PANTHER); IPR017972 (PROSITE_PATTERNS); NON_CYTOPLASMIC_DOMAIN (PHOBIUS); CYTOPLASMIC_DOMAIN (PHOBIUS); TRANSMEMBRANE (PHOBIUS); CYTOPLASMIC_DOMAIN (PHOBIUS); TRANSMEMBRANE (PHOBIUS); IPR001128 (SUPERFAMILY); TMhelix (TMHMM); TMhelix (TMHMM)                                                                                                                                                    |
| 1584 | 491412_length_1879_cvg_4.8_tip_1_2  | 60     | wd repeat-containing protein 37                 | 626 | 0         | 77.10% | 0.12  | IPR020472 (PRINTS); IPR001680 (SMART); IPR015943 (G3DSA:2.130.10.GENE3D); IPR001680 (PFAM); IPR015943 (G3DSA:2.130.10.GENE3D); PTHR19855:SF12 (PANTHER); PTHR19855 (PANTHER); IPR019775 (PROSITE_PATTERNS); IPR001680 (PROSITE_PROFILES); IPR001680 (PROSITE_PROFILES); IPR001680 (PROSITE_PROFILES); IPR001680 (PROSITE_PROFILES); IPR017986 (SUPERFAMILY)                                                                                                                                                                            |
| 1585 | 491418_length_1879_cvg_41.5_tip_1_4 | 361    | serine threonine-protein kinase grp-like        | 626 | 0         | 74.50% | 0.129 | IPR002290 (SMART); IPR000719 (PFAM); G3DSA:3.30.200.20 (GENE3D); G3DSA:1.10.510.10 (GENE3D); PTHR24344 (PANTHER); IPR017441 (PROSITE_PATTERNS); IPR008271 (PROSITE_PATTERNS); TRANSMEMBRANE (PHOBIUS); NON_CYTOPLASMIC_DOMAIN (PHOBIUS); CYTOPLASMIC_DOMAIN (PHOBIUS); IPR000719 (PROSITE_PROFILES); IPR011009 (SUPERFAMILY); TMhelix (TMHMM)                                                                                                                                                                                          |
| 1586 | 491458_length_1883_cvg_9.4_tip_1_1  | 78     | serine threonine-protein kinase osr1 isoform x2 | 628 | 0         | 83.30% | 0.111 | IPR002290 (SMART); G3DSA:1.10.510.10 (GENE3D); G3DSA:3.10.20.90 (GENE3D); G3DSA:3.30.200.20 (GENE3D); IPR000719 (PFAM); IPR024678 (PFAM); PTHR24361:SF201 (PANTHER); PTHR24361 (PANTHER); IPR017441 (PROSITE_PATTERNS); IPR000719 (PROSITE_PROFILES); IPR011009 (SUPERFAMILY)                                                                                                                                                                                                                                                          |
| 1587 | 491470_length_1884_cvg_5.4_tip_1_1  | 54     | 97 kda heat shock                               | 628 | 0         | 78.90% | 0.126 | IPR013126 (PRINTS); G3DSA:3.30.420.40 (GENE3D); G3DSA:3.90.640.10 (GENE3D); IPR029047 (G3DSA:2.60.34.GENE3D); G3DSA:3.30.30.30 (GENE3D); IPR013126 (PFAM); G3DSA:3.30.420.40 (GENE3D); PTHR19375:SF78 (PANTHER); PTHR19375 (PANTHER); IPR018181 (PROSITE_PATTERNS); SSF53067 (SUPERFAMILY); SSF53067 (SUPERFAMILY); IPR029047 (SUPERFAMILY)                                                                                                                                                                                            |
| 1588 | 491480_length_1885_cvg_31.5_tip_1_2 | 248    | carbohydrate sulfotransferase 11                | 628 | 5.95E-30  | 49.40% | 0.098 | IPR005331 (PFAM); IPR018011 (PANTHER); TRANSMEMBRANE (PHOBIUS); NON_CYTOPLASMIC_DOMAIN (PHOBIUS); CYTOPLASMIC_DOMAIN (PHOBIUS); TMhelix (TMHMM)                                                                                                                                                                                                                                                                                                                                                                                        |



|      |                                     |     |                                                                    |     |           |        |       |                                                                                                                                                                                                                                                                                                                                                                                                                                                                                                                                                                                                                                                                                                                                                                                                                                                                                                                               |
|------|-------------------------------------|-----|--------------------------------------------------------------------|-----|-----------|--------|-------|-------------------------------------------------------------------------------------------------------------------------------------------------------------------------------------------------------------------------------------------------------------------------------------------------------------------------------------------------------------------------------------------------------------------------------------------------------------------------------------------------------------------------------------------------------------------------------------------------------------------------------------------------------------------------------------------------------------------------------------------------------------------------------------------------------------------------------------------------------------------------------------------------------------------------------|
| 1594 | 491580_length_1897_cvg_15.6_tip_1_1 | 107 | arginine abc periplasmic arginine-binding protein                  | 632 | 0         | 99.40% | 0.126 | IPR001320 (SMART); IPR001638 (SMART); PF00497 (PFAM); IPR005768 (TIGRFAM); G3DSA:3.40.190.10 (GENE3D); G3DSA:3.40.190.10 (GENE3D); PTHR18966:SF152 (PANTHER); PTHR18966 (PANTHER); IPR018313 (PROSITE_PATTERNS); NON_CYTOPLASMIC_DOMAIN (PHOBIUS); TRANSMEMBRANE (PHOBIUS); NON_CYTOPLASMIC_DOMAIN (PHOBIUS); TRANSMEMBRANE (PHOBIUS); CYTOPLASMIC_DOMAIN (PHOBIUS); SSF53850 (SUPERFAMILY)                                                                                                                                                                                                                                                                                                                                                                                                                                                                                                                                   |
| 1597 | 491630_length_1903_cvg_18.7_tip_1_5 | 192 | btb poz domain-containing protein 17                               | 634 | 0         | 75.30% | 0.142 | IPR000210 (SMART); IPR011705 (SMART); G3DSA:3.30.710.10 (GENE3D); IPR013069 (PFAM); IPR011705 (PFAM); PTHR24410:SF9 (PANTHER); PTHR24410 (PANTHER); TRANSMEMBRANE (PHOBIUS); CYTOPLASMIC_DOMAIN (PHOBIUS); NON_CYTOPLASMIC_DOMAIN (PHOBIUS); IPR000210 (PROSITE_PROFILES); IPR011333 (SUPERFAMILY); TMhelix (TMHMM)                                                                                                                                                                                                                                                                                                                                                                                                                                                                                                                                                                                                           |
| 1598 | 491634_length_1903_cvg_3.0_tip_1_2  | 31  | zinc finger protein 436-like isoform x2                            | 634 | 5.85E-42  | 59.70% | 0.321 | IPR000210 (SMART); IPR015880 (SMART); IPR013087 (G3DSA:3.30.160.GENE3D); IPR013087 (G3DSA:3.30.160.GENE3D); IPR013069 (PFAM); G3DSA:3.30.710.10 (GENE3D); PF13465 (PFAM); PTHR24409 (PANTHER); IPR007087 (PROSITE_PATTERNS); IPR007087 (PROSITE_PATTERNS); IPR007087 (PROSITE_PATTERNS); IPR007087 (PROSITE_PATTERNS); IPR007087 (PROSITE_PATTERNS); CYTOPLASMIC_DOMAIN (PHOBIUS); TRANSMEMBRANE (PHOBIUS); NON_CYTOPLASMIC_DOMAIN (PHOBIUS); IPR007087 (PROSITE_PROFILES); IPR007087 (PROSITE_PROFILES); IPR007087 (PROSITE_PROFILES); IPR007087 (PROSITE_PROFILES); IPR000210 (PROSITE_PROFILES); IPR007087 (PROSITE_PROFILES); SSF57667 (SUPERFAMILY); IPR011333 (SUPERFAMILY); SSF57667 (SUPERFAMILY); SSF57667 (SUPERFAMILY); SSF57667 (SUPERFAMILY); TMhelix (TMHMM)                                                                                                                                                    |
| 1599 | 491638_length_1903_cvg_30.6_tip_1_3 | 343 | protein disulfide-isomerase a6                                     | 635 | 1.61E-140 | 81.70% | 0.102 | PR00421 (PRINTS); IPR013766 (PFAM); IPR012336 (G3DSA:3.40.30.GENE3D); IPR005788 (TIGRFAM); PTHR18929:SF38 (PANTHER); PTHR18929 (PANTHER); IPR017937 (PROSITE_PATTERNS); TRANSMEMBRANE (PHOBIUS); NON_CYTOPLASMIC_DOMAIN (PHOBIUS); CYTOPLASMIC_DOMAIN (PHOBIUS); IPR012336 (PROSITE_PROFILES); IPR012336 (SUPERFAMILY); IPR012336 (SUPERFAMILY); TMhelix (TMHMM)                                                                                                                                                                                                                                                                                                                                                                                                                                                                                                                                                              |
| 1600 | 491674_length_1907_cvg_4.7_tip_1_3  | 48  | sortilin-related I(dlr class) a repeats-containing-like isoform x2 | 636 | 0         | 69.90% | 0.114 | IPR002172 (PRINTS); IPR002172 (SMART); IPR000742 (SMART); IPR000033 (SMART); IPR002172 (G3DSA:4.10.400.GENE3D); IPR002172 (PFAM); G3DSA:2.10.25.10 (GENE3D); IPR000033 (PFAM); IPR011042 (G3DSA:2.120.10.GENE3D); IPR002172 (G3DSA:4.10.400.GENE3D); IPR002172 (G3DSA:4.10.400.GENE3D); PTHR12106:SF7 (PANTHER); PTHR12106 (PANTHER); IPR023415 (PROSITE_PATTERNS); IPR023415 (PROSITE_PATTERNS); IPR023415 (PROSITE_PATTERNS); IPR023415 (PROSITE_PATTERNS); IPR023415 (PROSITE_PATTERNS); IPR000033 (PROSITE_PROFILES); IPR002172 (PROSITE_PROFILES); IPR000033 (PROSITE_PROFILES); IPR002172 (PROSITE_PROFILES); IPR002172 (PROSITE_PROFILES); IPR000033 (PROSITE_PROFILES); IPR002172 (PROSITE_PROFILES); IPR000033 (PROSITE_PROFILES); IPR002172 (PROSITE_PROFILES); IPR002172 (SUPERFAMILY); IPR002172 (SUPERFAMILY); IPR002172 (SUPERFAMILY); IPR002172 (SUPERFAMILY); IPR002172 (SUPERFAMILY); SSF63825 (SUPERFAMILY) |
| 1611 | 491958_length_1937_cvg_17.7_tip_1_0 | 152 | adp-ribosylation factor-like protein 4a                            | 638 | 7.82E-109 | 86.80% | 0.114 | IPR006689 (PRINTS); IPR024156 (SMART); IPR003579 (SMART); IPR006687 (SMART); IPR006689 (PFAM); IPR027417 (G3DSA:3.40.50.GENE3D); IPR005225 (TIGRFAM); PTHR11711 (PANTHER); PTHR11711:SF121 (PANTHER); NON_CYTOPLASMIC_DOMAIN (PHOBIUS); TRANSMEMBRANE (PHOBIUS); CYTOPLASMIC_DOMAIN (PHOBIUS); IPR024156 (PROSITE_PROFILES); IPR027417 (SUPERFAMILY)                                                                                                                                                                                                                                                                                                                                                                                                                                                                                                                                                                          |
| 1615 | 492050_length_1948_cvg_50.0_tip_1_2 | 652 | peptidylglycine alpha-hydroxylating monooxygenase                  | 639 | 1.50E-167 | 78.10% | 0.157 | IPR000720 (PRINTS); IPR000323 (G3DSA:2.60.120.GENE3D); IPR000323 (PFAM); PF03712 (PFAM); IPR014784 (G3DSA:2.60.120.GENE3D); PTHR10680 (PANTHER); IPR014783 (PROSITE_PATTERNS); TRANSMEMBRANE (PHOBIUS); TRANSMEMBRANE (PHOBIUS); TRANSMEMBRANE (PHOBIUS); NON_CYTOPLASMIC_DOMAIN (PHOBIUS); CYTOPLASMIC_DOMAIN (PHOBIUS); NON_CYTOPLASMIC_DOMAIN (PHOBIUS); NON_CYTOPLASMIC_DOMAIN (PHOBIUS); CYTOPLASMIC_DOMAIN (PHOBIUS); TRANSMEMBRANE (PHOBIUS); IPR008977 (SUPERFAMILY); IPR008977 (SUPERFAMILY); IPR008977 (SUPERFAMILY); TMhelix (TMHMM); TMhelix (TMHMM); TMhelix (TMHMM); TMhelix (TMHMM)                                                                                                                                                                                                                                                                                                                            |



|      |                                     |      |                                                                                 |     |           |        |         |                                                                                                                                                                                                                                                                                                                                                                                                                                                                                                                                                                                                                                                                                                                                                                                                                                                                                                                                                |
|------|-------------------------------------|------|---------------------------------------------------------------------------------|-----|-----------|--------|---------|------------------------------------------------------------------------------------------------------------------------------------------------------------------------------------------------------------------------------------------------------------------------------------------------------------------------------------------------------------------------------------------------------------------------------------------------------------------------------------------------------------------------------------------------------------------------------------------------------------------------------------------------------------------------------------------------------------------------------------------------------------------------------------------------------------------------------------------------------------------------------------------------------------------------------------------------|
| 1603 | 491808_length_1920_cvg_5.8_tip_1_2  | 65   | antigen partial                                                                 | 640 | 0         | 99.10% | 0.184   | IPR024973 (PFAM); IPR012332 (G3DSA:2.160.20.GENE3D); PTHR12338 (PANTHER); IPR011050 (SUPERFAMILY)                                                                                                                                                                                                                                                                                                                                                                                                                                                                                                                                                                                                                                                                                                                                                                                                                                              |
| 1604 | 491846_length_1924_cvg_60.1_tip_1_1 | 8613 | retinal dehydrogenase 1-like                                                    | 641 | 0         | 82.10% | 0.207   | IPR016162 (G3DSA:3.40.605.GENE3D); IPR015590 (PFAM); IPR016163 (G3DSA:3.40.309.GENE3D); PTHR11699 (PANTHER); PTHR11699:SF145 (PANTHER); IPR029510 (PROSITE_PATTERNS); IPR016160 (PROSITE_PATTERNS); NON_CYTOPLASMIC_DOMAIN (PHOBIUS); CYTOPLASMIC_DOMAIN (PHOBIUS); TRANSMEMBRANE (PHOBIUS); NON_CYTOPLASMIC_DOMAIN (PHOBIUS); TRANSMEMBRANE (PHOBIUS); IPR016161 (SUPERFAMILY); TMhelix (TMHMM)                                                                                                                                                                                                                                                                                                                                                                                                                                                                                                                                               |
| 1610 | 491948_length_1937_cvg_22.4_tip_1_3 | 207  | gtp-binding protein sar1                                                        | 641 | 5.09E-123 | 93.90% | 0.249   | IPR006689 (PRINTS); IPR006687 (SMART); IPR024156 (SMART); IPR006689 (PFAM); IPR005225 (TIGRFAM); IPR027417 (G3DSA:3.40.50.GENE3D); PTHR11711:SF133 (PANTHER); PTHR11711 (PANTHER); TRANSMEMBRANE (PHOBIUS); TRANSMEMBRANE (PHOBIUS); TRANSMEMBRANE (PHOBIUS); CYTOPLASMIC_DOMAIN (PHOBIUS); NON_CYTOPLASMIC_DOMAIN (PHOBIUS); CYTOPLASMIC_DOMAIN (PHOBIUS); CYTOPLASMIC_DOMAIN (PHOBIUS); TRANSMEMBRANE (PHOBIUS); NON_CYTOPLASMIC_DOMAIN (PHOBIUS); IPR006687 (PROSITE_PROFILES); IPR027417 (SUPERFAMILY); TMhelix (TMHMM); TMhelix (TMHMM); TMhelix (TMHMM)                                                                                                                                                                                                                                                                                                                                                                                  |
| 1605 | 491878_length_1927_cvg_13.8_tip_1_2 | 152  | serine threonine-protein phosphatase 6 regulatory ankyrin repeat subunit c-like | 642 | 8.46E-96  | 55.00% | 0.123   | IPR002110 (SMART); IPR002110 (PFAM); IPR020683 (G3DSA:1.25.40.GENE3D); IPR020683 (G3DSA:1.25.40.GENE3D); IPR020683 (PFAM); IPR020683 (G3DSA:1.25.40.GENE3D); PTHR24198 (PANTHER); TRANSMEMBRANE (PHOBIUS); CYTOPLASMIC_DOMAIN (PHOBIUS); NON_CYTOPLASMIC_DOMAIN (PHOBIUS); IPR002110 (PROSITE_PROFILES); IPR002110 (PROSITE_PROFILES); IPR002110 (PROSITE_PROFILES); IPR002110 (PROSITE_PROFILES); IPR002110 (PROSITE_PROFILES); IPR002110 (PROSITE_PROFILES); IPR020683 (SUPERFAMILY)                                                                                                                                                                                                                                                                                                                                                                                                                                                         |
| 1616 | 492058_length_1949_cvg_61.8_tip_1_1 | 554  | u8-agatoxin-ao1a-like isoform x2                                                | 642 | 3.78E-32  | 78.10% | 0.366 Y | IPR004169 (PFAM); TRANSMEMBRANE (PHOBIUS); TRANSMEMBRANE (PHOBIUS); CYTOPLASMIC_DOMAIN (PHOBIUS); TRANSMEMBRANE (PHOBIUS); TRANSMEMBRANE (PHOBIUS); NON_CYTOPLASMIC_DOMAIN (PHOBIUS); NON_CYTOPLASMIC_DOMAIN (PHOBIUS); CYTOPLASMIC_DOMAIN (PHOBIUS); CYTOPLASMIC_DOMAIN (PHOBIUS); NON_CYTOPLASMIC_DOMAIN (PHOBIUS); SSF57059 (SUPERFAMILY); TMhelix (TMHMM); TMhelix (TMHMM); TMhelix (TMHMM); TMhelix (TMHMM)                                                                                                                                                                                                                                                                                                                                                                                                                                                                                                                               |
| 1618 | 492108_length_1954_cvg_20.3_tip_1_1 | 268  | mitochondrial 10-formyltetrahydrofolate dehydrogenase                           | 643 | 0         | 91.80% | 0.134   | IPR016162 (G3DSA:3.40.605.GENE3D); IPR015590 (PFAM); IPR016163 (G3DSA:3.40.309.GENE3D); PTHR11699 (PANTHER); PTHR11699:SF118 (PANTHER); IPR029510 (PROSITE_PATTERNS); IPR016160 (PROSITE_PATTERNS); IPR016161 (SUPERFAMILY)                                                                                                                                                                                                                                                                                                                                                                                                                                                                                                                                                                                                                                                                                                                    |
| 1606 | 491908_length_1932_cvg_24.5_tip_1_0 | 163  | agap005714-pa-like protein                                                      | 644 | 1.06E-156 | 50.20% | 0.1     | IPR000436 (SMART); IPR001881 (SMART); IPR000742 (SMART); IPR003410 (PFAM); G3DSA:2.10.25.10 (GENE3D); IPR001881 (PFAM); G3DSA:2.10.25.10 (GENE3D); G3DSA:2.10.70.10 (GENE3D); G3DSA:2.10.70.10 (GENE3D); IPR000436 (PFAM); PF14670 (PFAM); G3DSA:2.10.25.10 (GENE3D); G3DSA:2.10.25.10 (GENE3D); IPR023413 (G3DSA:2.40.155.GENE3D); PTHR24034 (PANTHER); IPR013032 (PROSITE_PATTERNS); IPR000152 (PROSITE_PATTERNS); IPR013032 (PROSITE_PATTERNS); IPR000152 (PROSITE_PATTERNS); IPR018097 (PROSITE_PATTERNS); IPR000152 (PROSITE_PATTERNS); IPR013032 (PROSITE_PATTERNS); IPR013032 (PROSITE_PATTERNS); IPR003410 (PROSITE_PROFILES); IPR000742 (PROSITE_PROFILES); IPR000742 (PROSITE_PROFILES); IPR000742 (PROSITE_PROFILES); IPR000436 (PROSITE_PROFILES); IPR000436 (PROSITE_PROFILES); IPR000436 (SUPERFAMILY); SSF57196 (SUPERFAMILY); SSF57196 (SUPERFAMILY); SSF57196 (SUPERFAMILY); IPR009030 (SUPERFAMILY); IPR000436 (SUPERFAMILY) |
| 1607 | 491922_length_1934_cvg_57.3_tip_1_3 | 629  | wd repeat-containing protein 86-like                                            | 645 | 8.52E-128 | 65.60% | 0.118   | IPR020472 (PRINTS); IPR001680 (SMART); IPR015943 (G3DSA:2.130.10.GENE3D); IPR001680 (PFAM); IPR015943 (G3DSA:2.130.10.GENE3D); PTHR22844:SF166 (PANTHER); PTHR22844 (PANTHER); IPR019775 (PROSITE_PATTERNS); IPR019775 (PROSITE_PATTERNS); NON_CYTOPLASMIC_DOMAIN (PHOBIUS); TRANSMEMBRANE (PHOBIUS); CYTOPLASMIC_DOMAIN (PHOBIUS); IPR001680 (PROSITE_PROFILES); IPR001680 (PROSITE_PROFILES); IPR001680 (PROSITE_PROFILES); IPR001680 (PROSITE_PROFILES); IPR017986 (PROSITE_PROFILES); IPR017986 (SUPERFAMILY); IPR011047 (SUPERFAMILY); TMhelix (TMHMM)                                                                                                                                                                                                                                                                                                                                                                                    |

|      |                                     |      |                                           |     |          |        |       |                                                                                                                                                                                                                                                                                                                                                                                                                                                                                                                                                                                                                                                                                                             |
|------|-------------------------------------|------|-------------------------------------------|-----|----------|--------|-------|-------------------------------------------------------------------------------------------------------------------------------------------------------------------------------------------------------------------------------------------------------------------------------------------------------------------------------------------------------------------------------------------------------------------------------------------------------------------------------------------------------------------------------------------------------------------------------------------------------------------------------------------------------------------------------------------------------------|
| 1609 | 491946_length_1937_cvg_48.6_tip_1_5 | 571  | zinc finger protein 239-like              | 645 | 3.55E-26 | 53.40% | 0.138 | IPR015880 (SMART); IPR013087 (G3DSA:3.30.160.GENE3D); IPR013087 (G3DSA:3.30.160.GENE3D); PF13465 (PFAM); IPR007087 (PFAM); PF13894 (PFAM); PTHR24409 (PANTHER); IPR007087 (PROSITE_PATTERNS); IPR007087 (PROSITE_PATTERNS); IPR007087 (PROSITE_PATTERNS); IPR007087 (PROSITE_PATTERNS); IPR007087 (PROSITE_PATTERNS); IPR007087 (PROSITE_PROFILES); IPR007087 (PROSITE_PROFILES); IPR007087 (PROSITE_PROFILES); IPR007087 (PROSITE_PROFILES); IPR007087 (PROSITE_PROFILES); IPR007087 (PROSITE_PROFILES); SSF57667 (SUPERFAMILY); SSF57667 (SUPERFAMILY); SSF57667 (SUPERFAMILY)                                                                                                                            |
| 1622 | 492202_length_1966_cvg_63.6_tip_1_5 | 1552 | hypothetical protein TcasGA2_TC013968     | 645 | 1.82E-10 | 46.29% | 0.136 | Coil (COILS); PTHR11008:SF13 (PANTHER); PTHR11008 (PANTHER); CYTOPLASMIC_DOMAIN (PHOBIUS); NON_CYTOPLASMIC_DOMAIN (PHOBIUS); TRANSMEMBRANE (PHOBIUS); TRANSMEMBRANE (PHOBIUS); TRANSMEMBRANE (PHOBIUS); TRANSMEMBRANE (PHOBIUS); CYTOPLASMIC_DOMAIN (PHOBIUS); NON_CYTOPLASMIC_DOMAIN (PHOBIUS); NON_CYTOPLASMIC_DOMAIN (PHOBIUS); IPR020234 (PRODOM); TMhelix (TMHMM); TMhelix (TMHMM); TMhelix (TMHMM); TMhelix (TMHMM); TMhelix (TMHMM)                                                                                                                                                                                                                                                                  |
| 1608 | 491932_length_1936_cvg_17.9_tip_1_0 | 182  | cytochrome p450                           | 646 | 0        | 69.90% | 0.33  | Coil (COILS); IPR002401 (PRINTS); IPR001128 (PRINTS); IPR001128 (PFAM); IPR001128 (G3DSA:1.10.630.GENE3D); PTHR24290:SF0 (PANTHER); PTHR24290 (PANTHER); IPR017972 (PROSITE_PATTERNS); TRANSMEMBRANE (PHOBIUS); NON_CYTOPLASMIC_DOMAIN (PHOBIUS); SIGNAL_PEPTIDE_H_REGION (PHOBIUS); SIGNAL_PEPTIDE_C_REGION (PHOBIUS); CYTOPLASMIC_DOMAIN (PHOBIUS); SIGNAL_PEPTIDE (PHOBIUS); SIGNAL_PEPTIDE_N_REGION (PHOBIUS); IPR001128 (SUPERFAMILY); TMhelix (TMHMM)                                                                                                                                                                                                                                                 |
| 1612 | 491968_length_1939_cvg_57.0_tip_1_2 | 489  | cell recognition protein caspr4 isoform 5 | 646 | 1.08E-66 | 54.10% | 0.103 | IPR001073 (SMART); IPR001073 (PFAM); IPR000885 (PFAM); IPR014716 (G3DSA:3.90.215.GENE3D); IPR008983 (G3DSA:2.60.120.GENE3D); PTHR10127:SF575 (PANTHER); PTHR10127 (PANTHER); TRANSMEMBRANE (PHOBIUS); NON_CYTOPLASMIC_DOMAIN (PHOBIUS); TRANSMEMBRANE (PHOBIUS); TRANSMEMBRANE (PHOBIUS); CYTOPLASMIC_DOMAIN (PHOBIUS); NON_CYTOPLASMIC_DOMAIN (PHOBIUS); NON_CYTOPLASMIC_DOMAIN (PHOBIUS); CYTOPLASMIC_DOMAIN (PHOBIUS); IPR002181 (PROSITE_PROFILES); IPR001073 (PROSITE_PROFILES); IPR008983 (SUPERFAMILY); IPR002181 (SUPERFAMILY); IPR002181 (SUPERFAMILY); TMhelix (TMHMM); TMhelix (TMHMM); TMhelix (TMHMM); TMhelix (TMHMM)                                                                         |
| 1625 | 492252_length_1972_cvg_13.9_tip_1_4 | 246  | coatomer subunit alpha                    | 647 | 0        | 81.70% | 0.109 | IPR010714 (PFAM); IPR006692 (PFAM); PTHR19876 (PANTHER)                                                                                                                                                                                                                                                                                                                                                                                                                                                                                                                                                                                                                                                     |
| 1613 | 492018_length_1944_cvg_26.8_tip_1_3 | 265  | ankyrin-1-like isoform x3                 | 648 | 0        | 80.20% | 0.108 | IPR002110 (PRINTS); IPR001496 (SMART); IPR002110 (SMART); IPR001496 (SMART); IPR002110 (PFAM); IPR002110 (PFAM); IPR020683 (G3DSA:1.25.40.GENE3D); IPR020683 (G3DSA:1.25.40.GENE3D); IPR020683 (PFAM); IPR020683 (G3DSA:1.25.40.GENE3D); IPR001496 (PFAM); PTHR24133 (PANTHER); TRANSMEMBRANE (PHOBIUS); CYTOPLASMIC_DOMAIN (PHOBIUS); NON_CYTOPLASMIC_DOMAIN (PHOBIUS); IPR001496 (PROSITE_PROFILES); IPR002110 (PROSITE_PROFILES); IPR002110 (PROSITE_PROFILES); IPR020683 (PROSITE_PROFILES); IPR002110 (PROSITE_PROFILES); IPR002110 (PROSITE_PROFILES); IPR002110 (PROSITE_PROFILES); IPR002110 (PROSITE_PROFILES); IPR020683 (SUPERFAMILY); SSF158235 (SUPERFAMILY); TMhelix (TMHMM); TMhelix (TMHMM) |
| 1614 | 492038_length_1946_cvg_59.0_tip_1_0 | 789  | ddb1- and cul4-associated factor 13-like  | 649 | 0        | 80.80% | 0.104 | IPR001680 (SMART); IPR001680 (PFAM); IPR007287 (PFAM); IPR015943 (G3DSA:2.130.10.GENE3D); PTHR22851:SF0 (PANTHER); PTHR22851 (PANTHER); IPR019775 (PROSITE_PATTERNS); NON_CYTOPLASMIC_DOMAIN (PHOBIUS); TRANSMEMBRANE (PHOBIUS); CYTOPLASMIC_DOMAIN (PHOBIUS); IPR001680 (PROSITE_PROFILES); IPR001680 (PROSITE_PROFILES); IPR017986 (PROSITE_PROFILES); IPR001680 (PROSITE_PROFILES); IPR001680 (PROSITE_PROFILES); IPR017986 (SUPERFAMILY); TMhelix (TMHMM)                                                                                                                                                                                                                                               |

|      |                                     |      |                                                          |     |          |        |       |                                                                                                                                                                                                                                                                                                                                                                                                                                                                                                                                                                                                                                                                                                                                                                     |
|------|-------------------------------------|------|----------------------------------------------------------|-----|----------|--------|-------|---------------------------------------------------------------------------------------------------------------------------------------------------------------------------------------------------------------------------------------------------------------------------------------------------------------------------------------------------------------------------------------------------------------------------------------------------------------------------------------------------------------------------------------------------------------------------------------------------------------------------------------------------------------------------------------------------------------------------------------------------------------------|
| 1623 | 492218_length_1968_cvg_44.2_tip_1_3 | 554  | hypothetical protein L798_04491                          | 649 | 4.36E-34 | 63.40% | 0.107 | IPR003961 (SMART); IPR003961 (PFAM); IPR013783 (G3DSA:2.60.40.GENE3D); PTHR21104 (PANTHER); TRANSMEMBRANE (PHOBIUS); CYTOPLASMIC_DOMAIN (PHOBIUS); NON_CYTOPLASMIC_DOMAIN (PHOBIUS); NON_CYTOPLASMIC_DOMAIN (PHOBIUS); NON_CYTOPLASMIC_DOMAIN (PHOBIUS); TRANSMEMBRANE (PHOBIUS); CYTOPLASMIC_DOMAIN (PHOBIUS); TRANSMEMBRANE (PHOBIUS); TRANSMEMBRANE (PHOBIUS); TRANSMEMBRANE (PHOBIUS); CYTOPLASMIC_DOMAIN (PHOBIUS); IPR003961 (PROSITE_PROFILES); IPR003961 (SUPERFAMILY); TMhelix (TMHMM); TMhelix (TMHMM)                                                                                                                                                                                                                                                    |
| 1619 | 492124_length_1956_cvg_7.0_tip_1_3  | 97   | esterase fe4                                             | 652 | 1.61E-65 | 70.80% | 0.108 | IPR029058 (G3DSA:3.40.50.GENE3D); IPR002018 (PFAM); PTHR11559 (PANTHER); IPR019826 (PROSITE_PATTERNS); IPR019819 (PROSITE_PATTERNS); IPR029058 (SUPERFAMILY)                                                                                                                                                                                                                                                                                                                                                                                                                                                                                                                                                                                                        |
| 1620 | 492124_length_1956_cvg_7.0_tip_1_4  | 97   | venom carboxylesterase-6                                 | 652 | 1.09E-38 | 53.10% | 0.137 | IPR029058 (G3DSA:3.40.50.GENE3D); IPR002018 (PFAM); PTHR11559 (PANTHER); CYTOPLASMIC_DOMAIN (PHOBIUS); NON_CYTOPLASMIC_DOMAIN (PHOBIUS); TRANSMEMBRANE (PHOBIUS); IPR029058 (SUPERFAMILY); TMhelix (TMHMM)                                                                                                                                                                                                                                                                                                                                                                                                                                                                                                                                                          |
| 1621 | 492184_length_1963_cvg_3.8_tip_1_1  | 52   | iron zinc purple acid phosphatase-like protein           | 654 | 0        | 75.30% | 0.297 | IPR015914 (G3DSA:2.60.40.GENE3D); IPR004843 (PFAM); IPR029052 (G3DSA:3.60.21.GENE3D); IPR025733 (PFAM); PTHR22953:SF9 (PANTHER); PTHR22953 (PANTHER); TRANSMEMBRANE (PHOBIUS); NON_CYTOPLASMIC_DOMAIN (PHOBIUS); CYTOPLASMIC_DOMAIN (PHOBIUS); TRANSMEMBRANE (PHOBIUS); CYTOPLASMIC_DOMAIN (PHOBIUS); IPR029052 (SUPERFAMILY); IPR008963 (SUPERFAMILY); TMhelix (TMHMM); TMhelix (TMHMM); TMhelix (TMHMM)                                                                                                                                                                                                                                                                                                                                                           |
| 1624 | 492240_length_1970_cvg_7.8_tip_1_5  | 75   | calcium calmodulin-dependent protein kinase ii isoform a | 656 | 0        | 93.60% | 0.138 | IPR002290 (SMART); IPR013543 (PFAM); G3DSA:1.10.510.10 (GENE3D); G3DSA:3.30.200.20 (GENE3D); IPR000719 (PFAM); G3DSA:3.10.450.50 (GENE3D); PTHR24347:SF108 (PANTHER); IPR020636 (PANTHER); IPR017441 (PROSITE_PATTERNS); IPR008271 (PROSITE_PATTERNS); CYTOPLASMIC_DOMAIN (PHOBIUS); NON_CYTOPLASMIC_DOMAIN (PHOBIUS); TRANSMEMBRANE (PHOBIUS); IPR000719 (PROSITE_PROFILES); SSF54427 (SUPERFAMILY); IPR011009 (SUPERFAMILY)                                                                                                                                                                                                                                                                                                                                       |
| 1633 | 492442_length_1999_cvg_58.9_tip_1_2 | 2859 | hemagglutinin amebocyte aggregation factor-like          | 657 | 1.22E-39 | 61.10% | 0.159 | PF14704 (PFAM); IPR026645 (PANTHER); CYTOPLASMIC_DOMAIN (PHOBIUS); NON_CYTOPLASMIC_DOMAIN (PHOBIUS); TRANSMEMBRANE (PHOBIUS); TMhelix (TMHMM)                                                                                                                                                                                                                                                                                                                                                                                                                                                                                                                                                                                                                       |
| 1631 | 492378_length_1989_cvg_61.9_tip_1_4 | 1087 | lissencephaly-1 homolog                                  | 658 | 0        | 90.90% | 0.171 | Coil (COILS); IPR020472 (PRINTS); IPR001680 (SMART); IPR006594 (SMART); IPR015943 (G3DSA:2.130.10.GENE3D); IPR006594 (PFAM); IPR001680 (PFAM); PTHR22847 (PANTHER); IPR019775 (PROSITE_PATTERNS); IPR019775 (PROSITE_PATTERNS); IPR019775 (PROSITE_PATTERNS); IPR019775 (PROSITE_PATTERNS); IPR019775 (PROSITE_PATTERNS); NON_CYTOPLASMIC_DOMAIN (PHOBIUS); CYTOPLASMIC_DOMAIN (PHOBIUS); NON_CYTOPLASMIC_DOMAIN (PHOBIUS); TRANSMEMBRANE (PHOBIUS); TRANSMEMBRANE (PHOBIUS); IPR001680 (PROSITE_PROFILES); IPR017986 (PROSITE_PROFILES); IPR001680 (PROSITE_PROFILES); IPR001680 (PROSITE_PROFILES); IPR001680 (PROSITE_PROFILES); IPR001680 (PROSITE_PROFILES); IPR001680 (PROSITE_PROFILES); IPR017252 (HAMAP); SSF109925 (SUPERFAMILY); IPR017986 (SUPERFAMILY) |
| 1626 | 492276_length_1975_cvg_2.7_tip_1_0  | 35   | peroxisomal multifunctional enzyme type 2                | 659 | 0        | 71.90% | 0.139 | IPR002198 (PRINTS); IPR002347 (PRINTS); IPR013968 (SMART); PF13452 (PFAM); IPR003033 (G3DSA:3.30.1050.GENE3D); IPR002198 (PFAM); IPR016040 (G3DSA:3.40.50.GENE3D); IPR002539 (PFAM); IPR029069 (G3DSA:3.10.129.GENE3D); IPR029069 (G3DSA:3.10.129.GENE3D); PTHR24316:SF2 (PANTHER); PTHR24316 (PANTHER); IPR020904 (PROSITE_PATTERNS); IPR029069 (SUPERFAMILY); SSF51735 (SUPERFAMILY); IPR029069 (SUPERFAMILY)                                                                                                                                                                                                                                                                                                                                                     |
| 1627 | 492346_length_1986_cvg_2.9_tip_1_4  | 42   | transmembrane protease serine partial                    | 662 | 1.07E-12 | 76.50% | 0.101 | IPR001254 (SMART); IPR001254 (PFAM); G3DSA:2.40.10.10 (GENE3D); PTHR24256 (PANTHER); TRANSMEMBRANE (PHOBIUS); NON_CYTOPLASMIC_DOMAIN (PHOBIUS); CYTOPLASMIC_DOMAIN (PHOBIUS); NON_CYTOPLASMIC_DOMAIN (PHOBIUS); TRANSMEMBRANE (PHOBIUS); CYTOPLASMIC_DOMAIN (PHOBIUS); TRANSMEMBRANE (PHOBIUS); IPR001254 (PROSITE_PROFILES); IPR009003 (SUPERFAMILY)                                                                                                                                                                                                                                                                                                                                                                                                               |







[illegible]

[illegible]

|      |                                     |      |                                                           |     |           |        |       |                                                                                                                                                                                                                                                                                                                                                                                                                                                                                                                                                                                                                                                                                                            |
|------|-------------------------------------|------|-----------------------------------------------------------|-----|-----------|--------|-------|------------------------------------------------------------------------------------------------------------------------------------------------------------------------------------------------------------------------------------------------------------------------------------------------------------------------------------------------------------------------------------------------------------------------------------------------------------------------------------------------------------------------------------------------------------------------------------------------------------------------------------------------------------------------------------------------------------|
| 1656 | 493030_length_2095_cvg_6.5_tip_1_3  | 86   | probable chitinase 3                                      | 699 | 3.08E-133 | 56.50% | 0.266 | IPR011583 (SMART); IPR002557 (SMART); IPR002557 (PFAM); IPR001223 (PFAM); IPR013781 (G3DSA:3.20.20.GENE3D); IPR029070 (G3DSA:3.10.50.GENE3D); IPR002557 (G3DSA:2.170.140.GENE3D); PTHR11177:SF112 (PANTHER); PTHR11177 (PANTHER); IPR001579 (PROSITE_PATTERNS); CYTOPLASMIC_DOMAIN (PHOBIUS); NON_CYTOPLASMIC_DOMAIN (PHOBIUS); TRANSMEMBRANE (PHOBIUS); NON_CYTOPLASMIC_DOMAIN (PHOBIUS); TRANSMEMBRANE (PHOBIUS); TRANSMEMBRANE (PHOBIUS); CYTOPLASMIC_DOMAIN (PHOBIUS); IPR002557 (PROSITE_PROFILES); IPR017853 (SUPERFAMILY); IPR002557 (SUPERFAMILY); IPR029070 (SUPERFAMILY); TMhelix (TMHMM); TMhelix (TMHMM)                                                                                       |
| 1658 | 493048_length_2098_cvg_62.9_tip_1_4 | 5871 | heat shock 70 kda protein cognate 3                       | 699 | 0         | 95.00% | 0.102 | Coil (COILS); Coil (COILS); IPR013126 (PRINTS); IPR029047 (G3DSA:2.60.34.GENE3D); G3DSA:3.30.420.40 (GENE3D); G3DSA:3.90.640.10 (GENE3D); G3DSA:3.30.420.40 (GENE3D); IPR029048 (G3DSA:1.20.1270.GENE3D); IPR013126 (PFAM); PTHR19375:SF157 (PANTHER); PTHR19375 (PANTHER); IPR018181 (PROSITE_PATTERNS); IPR018181 (PROSITE_PATTERNS); NON_CYTOPLASMIC_DOMAIN (PHOBIUS); CYTOPLASMIC_DOMAIN (PHOBIUS); TRANSMEMBRANE (PHOBIUS); SSF53067 (SUPERFAMILY); SSF53067 (SUPERFAMILY); IPR029047 (SUPERFAMILY); IPR029048 (SUPERFAMILY); TMhelix (TMHMM); TMhelix (TMHMM)                                                                                                                                        |
| 1659 | 493056_length_2099_cvg_8.0_tip_1_2  | 86   | mannosyl-oligosaccharide -alpha-mannosidase ia isoform x1 | 699 | 1.32E-53  | 87.40% | 0.109 | IPR001382 (PRINTS); IPR001382 (PFAM); IPR001382 (G3DSA:1.50.10.GENE3D); IPR001382 (PANTHER); PTHR11742:SF6 (PANTHER); NON_CYTOPLASMIC_DOMAIN (PHOBIUS); TRANSMEMBRANE (PHOBIUS); TRANSMEMBRANE (PHOBIUS); NON_CYTOPLASMIC_DOMAIN (PHOBIUS); NON_CYTOPLASMIC_DOMAIN (PHOBIUS); CYTOPLASMIC_DOMAIN (PHOBIUS); TRANSMEMBRANE (PHOBIUS); TRANSMEMBRANE (PHOBIUS); CYTOPLASMIC_DOMAIN (PHOBIUS); IPR001382 (SUPERFAMILY); TMhelix (TMHMM)                                                                                                                                                                                                                                                                       |
| 1663 | 493190_length_2123_cvg_3.0_tip_1_1  | 39   | zinc finger protein 850-like isoform x1                   | 699 | 2.15E-32  | 54.50% | 0.103 | IPR015880 (SMART); IPR013087 (G3DSA:3.30.160.GENE3D); PF13465 (PFAM); IPR013087 (G3DSA:3.30.160.GENE3D); IPR013087 (G3DSA:3.30.160.GENE3D); IPR007087 (PFAM); PTHR24409 (PANTHER); PTHR24409:SF14 (PANTHER); IPR007087 (PROSITE_PATTERNS); IPR007087 (PROSITE_PATTERNS); IPR007087 (PROSITE_PATTERNS); IPR007087 (PROSITE_PATTERNS); IPR007527 (PROSITE_PROFILES); IPR007087 (PROSITE_PROFILES); IPR007087 (PROSITE_PROFILES); IPR007087 (PROSITE_PROFILES); IPR007087 (PROSITE_PROFILES); IPR007087 (PROSITE_PROFILES); IPR007087 (PROSITE_PROFILES); SSF57667 (SUPERFAMILY); SSF57667 (SUPERFAMILY);                                                                                                     |
| 1665 | 493218_length_2132_cvg_4.2_tip_1_2  | 45   | neural cell adhesion molecule 1-b                         | 702 | 1.88E-71  | 57.20% | 0.103 | IPR003599 (SMART); IPR003961 (SMART); IPR003598 (SMART); IPR013098 (PFAM); IPR013783 (G3DSA:2.60.40.GENE3D); IPR003961 (PFAM); IPR013783 (G3DSA:2.60.40.GENE3D); PTHR19831 (PANTHER); PTHR19831:SF48 (PANTHER); NON_CYTOPLASMIC_DOMAIN (PHOBIUS); NON_CYTOPLASMIC_DOMAIN (PHOBIUS); TRANSMEMBRANE (PHOBIUS); TRANSMEMBRANE (PHOBIUS); CYTOPLASMIC_DOMAIN (PHOBIUS); TRANSMEMBRANE (PHOBIUS); CYTOPLASMIC_DOMAIN (PHOBIUS); TRANSMEMBRANE (PHOBIUS); NON_CYTOPLASMIC_DOMAIN (PHOBIUS); IPR007110 (PROSITE_PROFILES); IPR003961 (PROSITE_PROFILES); IPR007110 (PROSITE_PROFILES); IPR003961 (SUPERFAMILY); SSF48726 (SUPERFAMILY); SSF48726 (SUPERFAMILY); TMhelix (TMHMM); TMhelix (TMHMM); TMhelix (TMHMM) |
| 1660 | 493102_length_2109_cvg_28.7_tip_1_0 | 306  | dehydrogenase reductase sdr family member 11-like         | 703 | 3.58E-111 | 77.10% | 0.165 | IPR002347 (PRINTS); IPR002198 (PRINTS); IPR013968 (SMART); IPR002198 (PFAM); IPR016040 (G3DSA:3.40.50.GENE3D); PTHR24322 (PANTHER); PTHR24322:SF78 (PANTHER); IPR020904 (PROSITE_PATTERNS); TRANSMEMBRANE (PHOBIUS); CYTOPLASMIC_DOMAIN (PHOBIUS); NON_CYTOPLASMIC_DOMAIN (PHOBIUS); CYTOPLASMIC_DOMAIN (PHOBIUS); CYTOPLASMIC_DOMAIN (PHOBIUS); TRANSMEMBRANE (PHOBIUS); NON_CYTOPLASMIC_DOMAIN (PHOBIUS); TRANSMEMBRANE (PHOBIUS); CYTOPLASMIC_DOMAIN (PHOBIUS); TRANSMEMBRANE (PHOBIUS); TRANSMEMBRANE (PHOBIUS); SSF51735 (SUPERFAMILY); TMhelix (TMHMM); TMhelix (TMHMM); TMhelix (TMHMM); TMhelix (TMHMM)                                                                                            |
| 1662 | 493162_length_2121_cvg_2.0_tip_1_5  | 27   | glutaminy-peptide cyclotransferase                        | 707 | 2.90E-39  | 68.60% | 0.133 | IPR007484 (PFAM); G3DSA:3.40.630.10 (GENE3D); PTHR12283 (PANTHER); SSF53187 (SUPERFAMILY)                                                                                                                                                                                                                                                                                                                                                                                                                                                                                                                                                                                                                  |







|      |                                     |     |                                                            |     |           |        |         |                                                                                                                                                                                                                                                                                                                                                                                                                                                                                                                                                                                                                                                                                                                                                                                                                                                                                                                                                                                                                                                                                                                                                                                                                                                                                     |
|------|-------------------------------------|-----|------------------------------------------------------------|-----|-----------|--------|---------|-------------------------------------------------------------------------------------------------------------------------------------------------------------------------------------------------------------------------------------------------------------------------------------------------------------------------------------------------------------------------------------------------------------------------------------------------------------------------------------------------------------------------------------------------------------------------------------------------------------------------------------------------------------------------------------------------------------------------------------------------------------------------------------------------------------------------------------------------------------------------------------------------------------------------------------------------------------------------------------------------------------------------------------------------------------------------------------------------------------------------------------------------------------------------------------------------------------------------------------------------------------------------------------|
| 1679 | 493508_length_2197_cvg_10.8_tip_1_1 | 115 | cyclin-dependent kinase 9-like                             | 732 | 0         | 93.40% | 0.109   | IPR002290 (SMART); IPR000719 (PFAM); G3DSA:1.10.510.10 (GENE3D); G3DSA:3.30.200.20 (GENE3D); PTHR24056 (PANTHER); PTHR24056:SF158 (PANTHER); IPR008271 (PROSITE_PATTERNS); CYTOPLASMIC_DOMAIN (PHOBIUS); TRANSMEMBRANE (PHOBIUS); NON_CYTOPLASMIC_DOMAIN (PHOBIUS); TRANSMEMBRANE (PHOBIUS); NON_CYTOPLASMIC_DOMAIN (PHOBIUS); CYTOPLASMIC_DOMAIN (PHOBIUS); TRANSMEMBRANE (PHOBIUS); TRANSMEMBRANE (PHOBIUS); NON_CYTOPLASMIC_DOMAIN (PHOBIUS); IPR000719 (PROSITE_PROFILES); IPR011009 (SUPERFAMILY); TMhelix (TMHMM); TMhelix (TMHMM); TMhelix (TMHMM)                                                                                                                                                                                                                                                                                                                                                                                                                                                                                                                                                                                                                                                                                                                           |
| 1688 | 493638_length_2224_cvg_6.3_tip_1_2  | 109 | krueppel-like factor 3 isoform x1                          | 732 | 1.26E-61  | 71.20% | 0.139   | IPR015880 (SMART); PF13465 (PFAM); IPR013087 (G3DSA:3.30.160.GENE3D); IPR013087 (G3DSA:3.30.160.GENE3D); PTHR23223 (PANTHER); PTHR23223:SF132 (PANTHER); IPR007087 (PROSITE_PATTERNS); IPR007087 (PROSITE_PATTERNS); IPR007087 (PROSITE_PATTERNS); TRANSMEMBRANE (PHOBIUS); CYTOPLASMIC_DOMAIN (PHOBIUS); NON_CYTOPLASMIC_DOMAIN (PHOBIUS); IPR007087 (PROSITE_PROFILES); IPR007087 (PROSITE_PROFILES); IPR007087 (PROSITE_PROFILES); SSF57667 (SUPERFAMILY); SSF57667 (SUPERFAMILY)                                                                                                                                                                                                                                                                                                                                                                                                                                                                                                                                                                                                                                                                                                                                                                                                |
| 1692 | 493678_length_2235_cvg_58.9_tip_1_1 | 722 | vegetative cell wall protein gp1-like                      | 732 | 4.28E-14  | 48.90% | 0.162   | NON_CYTOPLASMIC_DOMAIN (PHOBIUS); TRANSMEMBRANE (PHOBIUS); NON_CYTOPLASMIC_DOMAIN (PHOBIUS); CYTOPLASMIC_DOMAIN (PHOBIUS); TRANSMEMBRANE (PHOBIUS); NON_CYTOPLASMIC_DOMAIN (PHOBIUS); TRANSMEMBRANE (PHOBIUS); CYTOPLASMIC_DOMAIN (PHOBIUS); CYTOPLASMIC_DOMAIN (PHOBIUS); CYTOPLASMIC_DOMAIN (PHOBIUS); TRANSMEMBRANE (PHOBIUS); TRANSMEMBRANE (PHOBIUS); TRANSMEMBRANE (PHOBIUS); TRANSMEMBRANE (PHOBIUS); NON_CYTOPLASMIC_DOMAIN (PHOBIUS); TMhelix (TMHMM); TMhelix (TMHMM); TMhelix (TMHMM)                                                                                                                                                                                                                                                                                                                                                                                                                                                                                                                                                                                                                                                                                                                                                                                    |
| 1693 | 493678_length_2235_cvg_58.9_tip_1_3 | 722 | muc19_human ame: full=mucin-19 short=muc-19 flags: partial | 732 | 1.21E-33  | 50.70% | 0.099   | CYTOPLASMIC_DOMAIN (PHOBIUS); NON_CYTOPLASMIC_DOMAIN (PHOBIUS); TRANSMEMBRANE (PHOBIUS); TMhelix (TMHMM)                                                                                                                                                                                                                                                                                                                                                                                                                                                                                                                                                                                                                                                                                                                                                                                                                                                                                                                                                                                                                                                                                                                                                                            |
| 1680 | 493512_length_2198_cvg_13.8_tip_1_0 | 150 | nicotinic acetylcholine receptor subunit alpha10           | 733 | 6.59E-105 | 59.10% | 0.675 Y | IPR006201 (PRINTS); IPR006029 (PFAM); IPR006202 (PFAM); IPR027361 (G3DSA:1.20.120.GENE3D); IPR006202 (G3DSA:2.70.170.GENE3D); PTHR18945:SF490 (PANTHER); IPR006201 (PANTHER); CYTOPLASMIC_DOMAIN (PHOBIUS); SIGNAL_PEPTIDE_C_REGION (PHOBIUS); NON_CYTOPLASMIC_DOMAIN (PHOBIUS); TRANSMEMBRANE (PHOBIUS); TRANSMEMBRANE (PHOBIUS); CYTOPLASMIC_DOMAIN (PHOBIUS); TRANSMEMBRANE (PHOBIUS); TRANSMEMBRANE (PHOBIUS); SIGNAL_PEPTIDE_N_REGION (PHOBIUS); NON_CYTOPLASMIC_DOMAIN (PHOBIUS); TRANSMEMBRANE (PHOBIUS); CYTOPLASMIC_DOMAIN (PHOBIUS); TRANSMEMBRANE (PHOBIUS); CYTOPLASMIC_DOMAIN (PHOBIUS); TRANSMEMBRANE (PHOBIUS); SIGNAL_PEPTIDE (PHOBIUS); TRANSMEMBRANE (PHOBIUS); CYTOPLASMIC_DOMAIN (PHOBIUS); NON_CYTOPLASMIC_DOMAIN (PHOBIUS); TRANSMEMBRANE (PHOBIUS); SIGNAL_PEPTIDE_H_REGION (PHOBIUS); NON_CYTOPLASMIC_DOMAIN (PHOBIUS); NON_CYTOPLASMIC_DOMAIN (PHOBIUS); CYTOPLASMIC_DOMAIN (PHOBIUS); NON_CYTOPLASMIC_DOMAIN (PHOBIUS); TRANSMEMBRANE (PHOBIUS); TRANSMEMBRANE (PHOBIUS); TRANSMEMBRANE (PHOBIUS); SignalP-noTM (SIGNALP_EUK); IPR006202 (SUPERFAMILY); IPR006029 (SUPERFAMILY); TMhelix (TMHMM); TMhelix (TMHMM) |
| 1689 | 493640_length_2225_cvg_28.7_tip_1_1 | 253 | dnaj homolog subfamily c member 7                          | 733 | 0         | 74.80% | 0.109   | IPR001623 (PRINTS); IPR019734 (SMART); IPR001623 (SMART); PF13414 (PFAM); IPR019734 (PFAM); IPR001623 (PFAM); IPR013105 (PFAM); IPR001623 (G3DSA:1.10.287.GENE3D); IPR011990 (G3DSA:1.25.40.GENE3D); IPR011990 (G3DSA:1.25.40.GENE3D); PTHR24078 (PANTHER); PTHR24078:SF140 (PANTHER); IPR018253 (PROSITE_PATTERNS); IPR019734 (PROSITE_PROFILES); IPR019734 (PROSITE_PROFILES); IPR013026 (PROSITE_PROFILES); IPR019734 (PROSITE_PROFILES); IPR019734 (PROSITE_PROFILES); IPR019734 (PROSITE_PROFILES); IPR001623 (PROSITE_PROFILES); IPR019734 (PROSITE_PROFILES); IPR001623 (SUPERFAMILY); SSF48452 (SUPERFAMILY); SSF48452 (SUPERFAMILY)                                                                                                                                                                                                                                                                                                                                                                                                                                                                                                                                                                                                                                        |



|      |                                     |      |                                        |     |           |        |       |                                                                                                                                                                                                                                                                                                                                                                                                                                                                                                                                                                                                                                                                                                                                                                                                       |
|------|-------------------------------------|------|----------------------------------------|-----|-----------|--------|-------|-------------------------------------------------------------------------------------------------------------------------------------------------------------------------------------------------------------------------------------------------------------------------------------------------------------------------------------------------------------------------------------------------------------------------------------------------------------------------------------------------------------------------------------------------------------------------------------------------------------------------------------------------------------------------------------------------------------------------------------------------------------------------------------------------------|
| 1690 | 493650_length_2230_cvg_52.7_tip_1_3 | 1148 | adp-ribosylation factor 1              | 744 | 2.23E-126 | 98.70% | 0.313 | IPR006689 (PRINTS); IPR006687 (SMART); IPR024156 (SMART); IPR003579 (SMART); IPR006689 (PFAM); IPR027417 (G3DSA:3.40.50.GENE3D); IPR005225 (TIGRFAM); PTHR11711 (PANTHER); PTHR11711:SF118 (PANTHER); CYTOPLASMIC_DOMAIN (PHOBIUS); NON_CYTOPLASMIC_DOMAIN (PHOBIUS); TRANSMEMBRANE (PHOBIUS); NON_CYTOPLASMIC_DOMAIN (PHOBIUS); TRANSMEMBRANE (PHOBIUS); NON_CYTOPLASMIC_DOMAIN (PHOBIUS); TRANSMEMBRANE (PHOBIUS); NON_CYTOPLASMIC_DOMAIN (PHOBIUS); TRANSMEMBRANE (PHOBIUS); CYTOPLASMIC_DOMAIN (PHOBIUS); TRANSMEMBRANE (PHOBIUS); CYTOPLASMIC_DOMAIN (PHOBIUS); NON_CYTOPLASMIC_DOMAIN (PHOBIUS); TRANSMEMBRANE (PHOBIUS); IPR024156 (PROSITE_PROFILES); IPR027417 (SUPERFAMILY); TMhelix (TMHMM); TMhelix (TMHMM); TMhelix (TMHMM); TMhelix (TMHMM)                                             |
| 1691 | 493674_length_2234_cvg_3.6_tip_1_2  | 51   | nephrin isoform x1                     | 744 | 1.09E-158 | 65.40% | 0.101 | IPR003598 (SMART); IPR003599 (SMART); IPR013783 (G3DSA:2.60.40.GENE3D); IPR013783 (G3DSA:2.60.40.GENE3D); IPR013783 (G3DSA:2.60.40.GENE3D); IPR013162 (PFAM); IPR013098 (PFAM); PTHR11640:SF31 (PANTHER); PTHR11640 (PANTHER); IPR007110 (PROSITE_PROFILES); IPR007110 (PROSITE_PROFILES); IPR007110 (PROSITE_PROFILES); SSF48726 (SUPERFAMILY); SSF48726 (SUPERFAMILY); SSF48726 (SUPERFAMILY); SSF48726 (SUPERFAMILY); SSF48726 (SUPERFAMILY)                                                                                                                                                                                                                                                                                                                                                       |
| 1699 | 493740_length_2254_cvg_26.6_tip_1_2 | 360  | ectoderm-expressed 3                   | 744 | 3.92E-154 | 57.30% | 0.135 | IPR001944 (PRINTS); IPR001944 (PFAM); IPR013781 (G3DSA:3.20.20.GENE3D); IPR008979 (G3DSA:2.60.120.GENE3D); IPR001944 (PANTHER); PTHR23421:SF13 (PANTHER); IPR019801 (PROSITE_PATTERNS); IPR017853 (SUPERFAMILY); IPR008979 (SUPERFAMILY)                                                                                                                                                                                                                                                                                                                                                                                                                                                                                                                                                              |
| 1704 | 493768_length_2263_cvg_19.3_tip_1_5 | 224  | coatomer subunit beta isoform x2       | 744 | 0         | 78.20% | 0.129 | IPR006692 (PFAM); PTHR19876 (PANTHER); PTHR19876:SF2 (PANTHER); IPR011044 (SUPERFAMILY)                                                                                                                                                                                                                                                                                                                                                                                                                                                                                                                                                                                                                                                                                                               |
| 1694 | 493680_length_2235_cvg_12.4_tip_1_2 | 122  | zinc finger protein 77-like isoform x2 | 745 | 1.06E-29  | 56.30% | 0.15  | IPR015880 (SMART); IPR013087 (G3DSA:3.30.160.GENE3D); IPR013087 (G3DSA:3.30.160.GENE3D); IPR007087 (PFAM); PF13894 (PFAM); PTHR24409 (PANTHER); PTHR24409:SF14 (PANTHER); IPR007087 (PROSITE_PATTERNS); CYTOPLASMIC_DOMAIN (PHOBIUS); NON_CYTOPLASMIC_DOMAIN (PHOBIUS); TRANSMEMBRANE (PHOBIUS); TRANSMEMBRANE (PHOBIUS); CYTOPLASMIC_DOMAIN (PHOBIUS); TRANSMEMBRANE (PHOBIUS); NON_CYTOPLASMIC_DOMAIN (PHOBIUS); IPR007087 (PROSITE_PROFILES); IPR007087 (PROSITE_PROFILES); IPR007087 (PROSITE_PROFILES); IPR007087 (PROSITE_PROFILES); SSF57667 (SUPERFAMILY); SSF57667 (SUPERFAMILY); SSF57667 (SUPERFAMILY) |
| 1695 | 493686_length_2240_cvg_62.9_tip_1_4 | 6242 | hemocyanin subunit type 1 precursor    | 747 | 0         | 75.50% | 0.372 | IPR013788 (PRINTS); IPR005203 (G3DSA:2.60.40.GENE3D); IPR000896 (PFAM); IPR005204 (G3DSA:1.20.1370.GENE3D); IPR005204 (PFAM); IPR005203 (PFAM); IPR008922 (G3DSA:1.10.1280.GENE3D); IPR013788 (PANTHER); PTHR11511:SF5 (PANTHER); IPR013788 (PROSITE_PATTERNS); IPR013788 (PROSITE_PATTERNS); IPR002227 (PROSITE_PATTERNS); CYTOPLASMIC_DOMAIN (PHOBIUS); TRANSMEMBRANE (PHOBIUS); SIGNAL_PEPTIDE_N_REGION (PHOBIUS); SIGNAL_PEPTIDE (PHOBIUS); SIGNAL_PEPTIDE_H_REGION (PHOBIUS); SIGNAL_PEPTIDE_C_REGION (PHOBIUS); NON_CYTOPLASMIC_DOMAIN (PHOBIUS); IPR005204 (SUPERFAMILY); IPR008922 (SUPERFAMILY); IPR014756 (SUPERFAMILY)                                                                                                                                                                     |
| 1696 | 493706_length_2246_cvg_5.6_tip_1_1  | 66   | lachesin-like isoform x1               | 749 | 2.91E-86  | 73.00% | 0.32  | IPR003598 (SMART); IPR003599 (SMART); IPR013783 (G3DSA:2.60.40.GENE3D); IPR013098 (PFAM); PTHR23279:SF12 (PANTHER); PTHR23279 (PANTHER); CYTOPLASMIC_DOMAIN (PHOBIUS); TRANSMEMBRANE (PHOBIUS); NON_CYTOPLASMIC_DOMAIN (PHOBIUS); IPR007110 (PROSITE_PROFILES); IPR007110 (PROSITE_PROFILES); SSF48726 (SUPERFAMILY); SSF48726 (SUPERFAMILY); TMhelix (TMHMM)                                                                                                                                                                                                                                                                                                                                                                                                                                         |

|      |                                     |     |                                                              |     |           |        |       |   |                                                                                                                                                                                                                                                                                                                                                                                                                                                                                                                                                                                                                                   |
|------|-------------------------------------|-----|--------------------------------------------------------------|-----|-----------|--------|-------|---|-----------------------------------------------------------------------------------------------------------------------------------------------------------------------------------------------------------------------------------------------------------------------------------------------------------------------------------------------------------------------------------------------------------------------------------------------------------------------------------------------------------------------------------------------------------------------------------------------------------------------------------|
|      |                                     |     |                                                              |     |           |        |       |   | Coil (COILS); IPR001547 (PFAM); IPR013781 (G3DSA:3.20.20.GENE3D); PTHR31308 (PANTHER); CYTOPLASMIC_DOMAIN (PHOBIUS); NON_CYTOPLASMIC_DOMAIN (PHOBIUS); TRANSMEMBRANE (PHOBIUS); TRANSMEMBRANE (PHOBIUS); NON_CYTOPLASMIC_DOMAIN (PHOBIUS); TRANSMEMBRANE (PHOBIUS); CYTOPLASMIC_DOMAIN (PHOBIUS); IPR017853 (SUPERFAMILY)                                                                                                                                                                                                                                                                                                         |
| 1697 | 493726_length_2251_cvg_10.8_tip_1_4 | 120 | glycoside catalytic core                                     | 750 | 8.25E-94  | 54.00% | 0.173 |   | IPR029058 (G3DSA:3.40.50.GENE3D); IPR002018 (PFAM); PTHR11559 (PANTHER); IPR019826 (PROSITE_PATTERNS); IPR019819 (PROSITE_PATTERNS); SIGNAL_PEPTIDE_H_REGION (PHOBIUS); SIGNAL_PEPTIDE_C_REGION (PHOBIUS); CYTOPLASMIC_DOMAIN (PHOBIUS); NON_CYTOPLASMIC_DOMAIN (PHOBIUS); SIGNAL_PEPTIDE (PHOBIUS); SIGNAL_PEPTIDE_N_REGION (PHOBIUS); TRANSMEMBRANE (PHOBIUS); SignalP-noTM (SIGNALP_GRAM_NEGATIVE); SignalP-noTM (SIGNALP_EUK); SignalP-TM (SIGNALP_GRAM_POSITIVE); IPR029058 (SUPERFAMILY)                                                                                                                                    |
| 1698 | 493738_length_2253_cvg_15.0_tip_1_5 | 155 | venom carboxylesterase-6 isoform x2                          | 751 | 2.24E-137 | 58.20% | 0.909 | Y | IPR001128 (PRINTS); IPR002401 (PRINTS); IPR001128 (PFAM); IPR001128 (G3DSA:1.10.630.GENE3D); PTHR24300 (PANTHER); IPR017972 (PROSITE_PATTERNS); TRANSMEMBRANE (PHOBIUS); CYTOPLASMIC_DOMAIN (PHOBIUS); CYTOPLASMIC_DOMAIN (PHOBIUS); NON_CYTOPLASMIC_DOMAIN (PHOBIUS); TRANSMEMBRANE (PHOBIUS); IPR001128 (SUPERFAMILY); TMhelix (TMHMM)                                                                                                                                                                                                                                                                                          |
| 1701 | 493746_length_2255_cvg_4.0_tip_1_0  | 58  | cytochrome p450 2j6-like                                     | 752 | 9.31E-105 | 56.00% | 0.146 |   | IPR002223 (PRINTS); IPR003645 (SMART); IPR002223 (SMART); IPR008197 (SMART); IPR002223 (PFAM); IPR008197 (G3DSA:4.10.75.GENE3D); IPR008197 (PFAM); IPR002223 (G3DSA:4.10.410.GENE3D); PTHR10083 (PANTHER); IPR020901 (PROSITE_PATTERNS); TRANSMEMBRANE (PHOBIUS); CYTOPLASMIC_DOMAIN (PHOBIUS); NON_CYTOPLASMIC_DOMAIN (PHOBIUS); CYTOPLASMIC_DOMAIN (PHOBIUS); TRANSMEMBRANE (PHOBIUS); IPR008197 (PROSITE_PROFILES); IPR008197 (PROSITE_PROFILES); IPR008197 (PROSITE_PROFILES); IPR008197 (PROSITE_PROFILES); IPR008197 (PROSITE_PROFILES); IPR002223 (SUPERFAMILY); IPR008197 (SUPERFAMILY); TMhelix (TMHMM); TMhelix (TMHMM) |
| 1703 | 493758_length_2261_cvg_19.4_tip_1_0 | 306 | egf domain protein                                           | 754 | 1.65E-11  | 41.60% | 0.467 | Y | IPR002618 (PFAM); IPR029044 (G3DSA:3.90.550.GENE3D); IPR002618 (PANTHER); IPR016267 (PTHR11952:PANTHER); CYTOPLASMIC_DOMAIN (PHOBIUS); TRANSMEMBRANE (PHOBIUS); TRANSMEMBRANE (PHOBIUS); NON_CYTOPLASMIC_DOMAIN (PHOBIUS); TRANSMEMBRANE (PHOBIUS); CYTOPLASMIC_DOMAIN (PHOBIUS); NON_CYTOPLASMIC_DOMAIN (PHOBIUS); IPR029044 (SUPERFAMILY); TMhelix (TMHMM); TMhelix (TMHMM); TMhelix (TMHMM)                                                                                                                                                                                                                                    |
| 1705 | 493778_length_2267_cvg_53.8_tip_1_0 | 567 | utp--glucose-1-phosphate uridylyltransferase-like            | 756 | 0         | 84.40% | 0.108 |   | IPR029033 (G3DSA:3.40.50.GENE3D); IPR000560 (PFAM); PTHR20963 (PANTHER); PTHR20963:Sf8 (PANTHER); IPR000560 (PROSITE_PATTERNS); NON_CYTOPLASMIC_DOMAIN (PHOBIUS); TRANSMEMBRANE (PHOBIUS); CYTOPLASMIC_DOMAIN (PHOBIUS); TRANSMEMBRANE (PHOBIUS); CYTOPLASMIC_DOMAIN (PHOBIUS); TRANSMEMBRANE (PHOBIUS); TRANSMEMBRANE (PHOBIUS); NON_CYTOPLASMIC_DOMAIN (PHOBIUS); NON_CYTOPLASMIC_DOMAIN (PHOBIUS); IPR029033 (SUPERFAMILY); TMhelix (TMHMM)                                                                                                                                                                                    |
| 1706 | 493828_length_2280_cvg_32.5_tip_1_2 | 939 | multiple inositol polyphosphate phosphatase 1                | 760 | 1.94E-142 | 61.20% | 0.29  |   | IPR001839 (SMART); IPR001111 (PFAM); IPR029034 (G3DSA:2.10.90.GENE3D); IPR001839 (PFAM); PTHR11848:Sf131 (PANTHER); IPR015615 (PANTHER); IPR017948 (PROSITE_PATTERNS); TRANSMEMBRANE (PHOBIUS); NON_CYTOPLASMIC_DOMAIN (PHOBIUS); CYTOPLASMIC_DOMAIN (PHOBIUS); IPR001839 (PROSITE_PROFILES); IPR029034 (SUPERFAMILY); TMhelix (TMHMM); TMhelix (TMHMM)                                                                                                                                                                                                                                                                           |
| 1707 | 493852_length_2287_cvg_3.7_tip_1_2  | 42  | transforming growth factor beta superfamily signaling ligand | 762 | 3.21E-87  | 54.20% | 0.151 |   | IPR002110 (SMART); IPR020683 (G3DSA:1.25.40.GENE3D); IPR020683 (PFAM); PTHR24152 (PANTHER); TRANSMEMBRANE (PHOBIUS); NON_CYTOPLASMIC_DOMAIN (PHOBIUS); CYTOPLASMIC_DOMAIN (PHOBIUS); TRANSMEMBRANE (PHOBIUS); NON_CYTOPLASMIC_DOMAIN (PHOBIUS); CYTOPLASMIC_DOMAIN (PHOBIUS); TRANSMEMBRANE (PHOBIUS); NON_CYTOPLASMIC_DOMAIN (PHOBIUS); TRANSMEMBRANE (PHOBIUS); CYTOPLASMIC_DOMAIN (PHOBIUS); TRANSMEMBRANE (PHOBIUS); IPR002110 (PROSITE_PROFILES); IPR020683 (PROSITE_PROFILES); IPR020683 (SUPERFAMILY); TMhelix (TMHMM); TMhelix (TMHMM)                                                                                    |
| 1711 | 493940_length_2317_cvg_39.4_tip_1_5 | 443 | myotrophin-like isoform 2                                    | 764 | 6.55E-53  | 84.20% | 0.141 |   | IPR002110 (SMART); IPR020683 (G3DSA:1.25.40.GENE3D); IPR020683 (PFAM); PTHR24152 (PANTHER); TRANSMEMBRANE (PHOBIUS); NON_CYTOPLASMIC_DOMAIN (PHOBIUS); CYTOPLASMIC_DOMAIN (PHOBIUS); TRANSMEMBRANE (PHOBIUS); NON_CYTOPLASMIC_DOMAIN (PHOBIUS); CYTOPLASMIC_DOMAIN (PHOBIUS); TRANSMEMBRANE (PHOBIUS); NON_CYTOPLASMIC_DOMAIN (PHOBIUS); TRANSMEMBRANE (PHOBIUS); CYTOPLASMIC_DOMAIN (PHOBIUS); TRANSMEMBRANE (PHOBIUS); IPR002110 (PROSITE_PROFILES); IPR020683 (PROSITE_PROFILES); IPR020683 (SUPERFAMILY); TMhelix (TMHMM); TMhelix (TMHMM)                                                                                    |

|      |                                     |       |                                                         |     |           |        |         |                                                                                                                                                                                                                                                                                                                                                                                                                                                                                                                                                                                                                                                                                                                                                                                                                                                |
|------|-------------------------------------|-------|---------------------------------------------------------|-----|-----------|--------|---------|------------------------------------------------------------------------------------------------------------------------------------------------------------------------------------------------------------------------------------------------------------------------------------------------------------------------------------------------------------------------------------------------------------------------------------------------------------------------------------------------------------------------------------------------------------------------------------------------------------------------------------------------------------------------------------------------------------------------------------------------------------------------------------------------------------------------------------------------|
| 1713 | 493972_length_2326_cvg_48.4_tip_1_5 | 665   | facilitated trehalose transporter tret1-like isoform x1 | 766 | 5.31E-111 | 58.80% | 0.11    | IPR003663 (PRINTS); G3DSA:1.20.1250.20 (GENE3D); IPR003663 (TIGRFAM); IPR005828 (PFAM); PTHR24063 (PANTHER); IPR005829 (PROSITE_PATTERNS); TRANSMEMBRANE (PHOBIUS); CYTOPLASMIC_DOMAIN (PHOBIUS); TRANSMEMBRANE (PHOBIUS); CYTOPLASMIC_DOMAIN (PHOBIUS); CYTOPLASMIC_DOMAIN (PHOBIUS); TRANSMEMBRANE (PHOBIUS); TRANSMEMBRANE (PHOBIUS); NON_CYTOPLASMIC_DOMAIN (PHOBIUS); TRANSMEMBRANE (PHOBIUS); CYTOPLASMIC_DOMAIN (PHOBIUS); NON_CYTOPLASMIC_DOMAIN (PHOBIUS); TRANSMEMBRANE (PHOBIUS); TRANSMEMBRANE (PHOBIUS); CYTOPLASMIC_DOMAIN (PHOBIUS); NON_CYTOPLASMIC_DOMAIN (PHOBIUS); IPR020846 (PROSITE_PROFILES); SSF141571 (SUPERFAMILY); IPR020846 (SUPERFAMILY); TMhelix (TMHMM); TMhelix (TMHMM) |
| 1708 | 493900_length_2307_cvg_50.2_tip_1_5 | 597   | low quality protein: hemocytin                          | 769 | 1.09E-79  | 47.10% | 0.819 Y | IPR001846 (SMART); IPR001846 (PFAM); IPR014853 (PFAM); G3DSA:2.10.25.10 (GENE3D); PTHR11339 (PANTHER); PTHR11339:SF25 (PANTHER); IPR001846 (PROSITE_PROFILES); IPR001846 (PROSITE_PROFILES); SignalP-noTM (SIGNALP_EUK); IPR002919 (SUPERFAMILY)                                                                                                                                                                                                                                                                                                                                                                                                                                                                                                                                                                                               |
| 1709 | 493908_length_2309_cvg_10.0_tip_1_2 | 141   | neuropeptides capa receptor-like                        | 769 | 1.38E-149 | 74.00% | 0.327   | Coil (COILS); IPR005390 (PRINTS); IPR000276 (PRINTS); IPR000276 (PFAM); G3DSA:1.20.1070.10 (GENE3D); PTHR24243 (PANTHER); PTHR24243:SF107 (PANTHER); IPR000276 (PROSITE_PATTERNS); TRANSMEMBRANE (PHOBIUS); TRANSMEMBRANE (PHOBIUS); CYTOPLASMIC_DOMAIN (PHOBIUS); TRANSMEMBRANE (PHOBIUS); NON_CYTOPLASMIC_DOMAIN (PHOBIUS); CYTOPLASMIC_DOMAIN (PHOBIUS); CYTOPLASMIC_DOMAIN (PHOBIUS); TRANSMEMBRANE (PHOBIUS); NON_CYTOPLASMIC_DOMAIN (PHOBIUS); NON_CYTOPLASMIC_DOMAIN (PHOBIUS); TRANSMEMBRANE (PHOBIUS); TRANSMEMBRANE (PHOBIUS); NON_CYTOPLASMIC_DOMAIN (PHOBIUS); IPR017452 (PROSITE_PROFILES); SSF81321 (SUPERFAMILY); TMhelix (TMHMM); TMhelix (TMHMM); TMhelix (TMHMM); TMhelix (TMHMM); TMhelix (TMHMM); TMhelix (TMHMM)                                                                                                          |
| 1710 | 493912_length_2309_cvg_3.2_tip_1_1  | 49    | probable chitinase 3                                    | 770 | 4.44E-130 | 56.80% | 0.106   | IPR011583 (SMART); IPR002557 (SMART); IPR013781 (G3DSA:3.20.20.GENE3D); IPR002557 (PFAM); IPR029070 (G3DSA:3.10.50.GENE3D); IPR001223 (PFAM); IPR002557 (G3DSA:2.170.140.GENE3D); PTHR11177 (PANTHER); PTHR11177:SF112 (PANTHER); IPR001579 (PROSITE_PATTERNS); NON_CYTOPLASMIC_DOMAIN (PHOBIUS); TRANSMEMBRANE (PHOBIUS); CYTOPLASMIC_DOMAIN (PHOBIUS); CYTOPLASMIC_DOMAIN (PHOBIUS); TRANSMEMBRANE (PHOBIUS); TRANSMEMBRANE (PHOBIUS); NON_CYTOPLASMIC_DOMAIN (PHOBIUS); CYTOPLASMIC_DOMAIN (PHOBIUS); IPR002557 (PROSITE_PROFILES); IPR002557 (PROSITE_PROFILES); IPR002557 (SUPERFAMILY); IPR002557 (SUPERFAMILY); IPR017853 (SUPERFAMILY); IPR002557 (SUPERFAMILY); TMhelix (TMHMM); TMhelix (TMHMM)                                                                                                                                      |
| 1721 | 494088_length_2364_cvg_65.4_tip_1_5 | 46408 | heat shock cognate protein 70                           | 773 | 0         | 94.80% | 0.179   | Coil (COILS); IPR013126 (PRINTS); IPR029048 (G3DSA:1.20.1270.GENE3D); IPR029047 (G3DSA:2.60.34.GENE3D); G3DSA:3.30.420.40 (GENE3D); G3DSA:3.30.30.30 (GENE3D); G3DSA:3.30.420.40 (GENE3D); IPR013126 (PFAM); G3DSA:3.90.640.10 (GENE3D); PTHR19375:SF142 (PANTHER); PTHR19375 (PANTHER); IPR018181 (PROSITE_PATTERNS); IPR018181 (PROSITE_PATTERNS); TRANSMEMBRANE (PHOBIUS); TRANSMEMBRANE (PHOBIUS); CYTOPLASMIC_DOMAIN (PHOBIUS); NON_CYTOPLASMIC_DOMAIN (PHOBIUS); NON_CYTOPLASMIC_DOMAIN (PHOBIUS); SSF53067 (SUPERFAMILY); SSF53067 (SUPERFAMILY); IPR029048 (SUPERFAMILY)                                                                                                                                                                                                                                                               |



|      |                                     |     |                                                               |     |          |        |         |                                                                                                                                                                                                                                                                                                                                                                                                                                                                                                                                                                                                                                                                                                                                                                                                                                                                                                                               |
|------|-------------------------------------|-----|---------------------------------------------------------------|-----|----------|--------|---------|-------------------------------------------------------------------------------------------------------------------------------------------------------------------------------------------------------------------------------------------------------------------------------------------------------------------------------------------------------------------------------------------------------------------------------------------------------------------------------------------------------------------------------------------------------------------------------------------------------------------------------------------------------------------------------------------------------------------------------------------------------------------------------------------------------------------------------------------------------------------------------------------------------------------------------|
| 1712 | 493964_length_2323_cvg_13.9_tip_1_5 | 187 | poc1 centriolar protein homolog a                             | 774 | 0        | 73.40% | 0.231   | Coil (COILS); IPR001680 (SMART); IPR001680 (PFAM); IPR015943 (G3DSA:2.130.10.GENE3D); PTHR22847:SF319 (PANTHER); PTHR22847 (PANTHER); IPR019775 (PROSITE_PATTERNS); IPR001680 (PROSITE_PROFILES); IPR001680 (PROSITE_PROFILES); IPR001680 (PROSITE_PROFILES); IPR001680 (PROSITE_PROFILES); IPR017986 (PROSITE_PROFILES); IPR001680 (PROSITE_PROFILES); IPR017986 (SUPERFAMILY)                                                                                                                                                                                                                                                                                                                                                                                                                                                                                                                                               |
| 1717 | 494042_length_2347_cvg_9.0_tip_1_1  | 95  | zinc finger protein 501 isoform x2                            | 774 | 6.80E-11 | 60.30% | 0.172   | IPR000210 (SMART); IPR015880 (SMART); IPR013087 (G3DSA:3.30.160.GENE3D); IPR013087 (G3DSA:3.30.160.GENE3D); IPR013069 (PFAM); G3DSA:3.30.710.10 (GENE3D); PTHR24409 (PANTHER); PTHR24409:SF14 (PANTHER); IPR007087 (PROSITE_PATTERNS); NON_CYTOPLASMIC_DOMAIN (PHOBIUS); CYTOPLASMIC_DOMAIN (PHOBIUS); TRANSMEMBRANE (PHOBIUS); IPR007087 (PROSITE_PROFILES); IPR000210 (PROSITE_PROFILES); IPR011333 (SUPERFAMILY); SSF57667 (SUPERFAMILY); TMhelix (TMHMM)                                                                                                                                                                                                                                                                                                                                                                                                                                                                  |
| 1714 | 493994_length_2334_cvg_5.1_tip_1_4  | 57  | cadherin egf lag seven-pass g-type receptor 1-like isoform x6 | 778 | 2.63E-35 | 44.10% | 0.151   | IPR000832 (PFAM); PTHR12011:SF74 (PANTHER); PTHR12011 (PANTHER); TRANSMEMBRANE (PHOBIUS); TRANSMEMBRANE (PHOBIUS); TRANSMEMBRANE (PHOBIUS); NON_CYTOPLASMIC_DOMAIN (PHOBIUS); NON_CYTOPLASMIC_DOMAIN (PHOBIUS); CYTOPLASMIC_DOMAIN (PHOBIUS); TRANSMEMBRANE (PHOBIUS); CYTOPLASMIC_DOMAIN (PHOBIUS); NON_CYTOPLASMIC_DOMAIN (PHOBIUS); CYTOPLASMIC_DOMAIN (PHOBIUS); NON_CYTOPLASMIC_DOMAIN (PHOBIUS); NON_CYTOPLASMIC_DOMAIN (PHOBIUS); TRANSMEMBRANE (PHOBIUS); CYTOPLASMIC_DOMAIN (PHOBIUS); NON_CYTOPLASMIC_DOMAIN (PHOBIUS); TRANSMEMBRANE (PHOBIUS); TRANSMEMBRANE (PHOBIUS); TRANSMEMBRANE (PHOBIUS); CYTOPLASMIC_DOMAIN (PHOBIUS); TRANSMEMBRANE (PHOBIUS); CYTOPLASMIC_DOMAIN (PHOBIUS); TRANSMEMBRANE (PHOBIUS); CYTOPLASMIC_DOMAIN (PHOBIUS); IPR017981 (PROSITE_PROFILES); TMhelix (TMHMM); TMhelix (TMHMM) |
| 1715 | 494014_length_2341_cvg_45.5_tip_1_4 | 478 | iduronate 2-sulfatase                                         | 780 | 0        | 67.60% | 0.462 Y | G3DSA:3.30.1120.10 (GENE3D); IPR017849 (G3DSA:3.40.720.GENE3D); IPR000917 (PFAM); PTHR10342:SF185 (PANTHER); PTHR10342 (PANTHER); IPR024607 (PROSITE_PATTERNS); NON_CYTOPLASMIC_DOMAIN (PHOBIUS); TRANSMEMBRANE (PHOBIUS); TRANSMEMBRANE (PHOBIUS); CYTOPLASMIC_DOMAIN (PHOBIUS); SignalP-noTM (SIGNALP_EUK); IPR017850 (SUPERFAMILY)                                                                                                                                                                                                                                                                                                                                                                                                                                                                                                                                                                                         |
| 1716 | 494016_length_2341_cvg_17.7_tip_1_3 | 202 | wd repeat-containing protein 82                               | 781 | 0        | 94.80% | 0.18    | IPR001680 (SMART); IPR015943 (G3DSA:2.130.10.GENE3D); IPR001680 (PFAM); PTHR19861:SF2 (PANTHER); PTHR19861 (PANTHER); IPR019775 (PROSITE_PATTERNS); TRANSMEMBRANE (PHOBIUS); TRANSMEMBRANE (PHOBIUS); CYTOPLASMIC_DOMAIN (PHOBIUS); CYTOPLASMIC_DOMAIN (PHOBIUS); CYTOPLASMIC_DOMAIN (PHOBIUS); NON_CYTOPLASMIC_DOMAIN (PHOBIUS); TRANSMEMBRANE (PHOBIUS); TRANSMEMBRANE (PHOBIUS); NON_CYTOPLASMIC_DOMAIN (PHOBIUS); TRANSMEMBRANE (PHOBIUS); NON_CYTOPLASMIC_DOMAIN (PHOBIUS); IPR001680 (PROSITE_PROFILES); IPR017986 (PROSITE_PROFILES); IPR001680 (PROSITE_PROFILES); IPR001680 (PROSITE_PROFILES); IPR017986 (SUPERFAMILY); TMhelix (TMHMM); TMhelix (TMHMM); TMhelix (TMHMM)                                                                                                                                                                                                                                           |





|      |                                     |       |                                                                                      |     |           |        |       |                                                                                                                                                                                                                                                                                                                                                                                                                                                                                                                                                                                                                                             |
|------|-------------------------------------|-------|--------------------------------------------------------------------------------------|-----|-----------|--------|-------|---------------------------------------------------------------------------------------------------------------------------------------------------------------------------------------------------------------------------------------------------------------------------------------------------------------------------------------------------------------------------------------------------------------------------------------------------------------------------------------------------------------------------------------------------------------------------------------------------------------------------------------------|
| 1728 | 494156_length_2388_cvg_7.9_tip_1_4  | 110   | membrane-associated guanylate ww and pdz domain-containing protein 1-like isoform x1 | 796 | 4.10E-35  | 81.40% | 0.161 | IPR001478 (SMART); IPR001478 (G3DSA:2.30.42.GENE3D); IPR001478 (PFAM); PTHR10316:SF40 (PANTHER); PTHR10316 (PANTHER); NON_CYTOPLASMIC_DOMAIN (PHOBIUS); TRANSMEMBRANE (PHOBIUS); CYTOPLASMIC_DOMAIN (PHOBIUS); IPR001478 (PROSITE_PROFILES); IPR001478 (SUPERFAMILY); TMhelix (TMHMM); TMhelix (TMHMM)                                                                                                                                                                                                                                                                                                                                      |
| 1736 | 494282_length_2452_cvg_51.4_tip_1_5 | 868   | heat shock 70 kda protein cognate 5                                                  | 800 | 0         | 89.00% | 0.22  | Coil (COILS); IPR013126 (PRINTS); G3DSA:3.30.30.30 (GENE3D); G3DSA:3.90.640.10 (GENE3D); IPR012725 (TIGRFAM); IPR029048 (G3DSA:1.20.1270.GENE3D); IPR013126 (PFAM); G3DSA:3.30.420.40 (GENE3D); G3DSA:3.30.420.40 (GENE3D); IPR029047 (G3DSA:2.60.34.GENE3D); PTHR19375:SF173 (PANTHER); PTHR19375 (PANTHER); IPR018181 (PROSITE_PATTERNS); IPR018181 (PROSITE_PATTERNS); IPR018181 (PROSITE_PATTERNS); IPR012725 (HAMAP); SSF53067 (SUPERFAMILY); IPR029047 (SUPERFAMILY); SSF53067 (SUPERFAMILY)                                                                                                                                          |
| 1731 | 494218_length_2425_cvg_7.6_tip_1_3  | 91    | phospholipase a2                                                                     | 809 | 1.44E-26  | 48.90% | 0.161 | IPR016090 (SMART); IPR016090 (PFAM); IPR016090 (G3DSA:1.20.90.GENE3D); IPR001211 (PANTHER); PTHR11716:SF45 (PANTHER); CYTOPLASMIC_DOMAIN (PHOBIUS); TRANSMEMBRANE (PHOBIUS); NON_CYTOPLASMIC_DOMAIN (PHOBIUS); TRANSMEMBRANE (PHOBIUS); NON_CYTOPLASMIC_DOMAIN (PHOBIUS); NON_CYTOPLASMIC_DOMAIN (PHOBIUS); TRANSMEMBRANE (PHOBIUS); CYTOPLASMIC_DOMAIN (PHOBIUS); TRANSMEMBRANE (PHOBIUS); CYTOPLASMIC_DOMAIN (PHOBIUS); NON_CYTOPLASMIC_DOMAIN (PHOBIUS); TRANSMEMBRANE (PHOBIUS); TRANSMEMBRANE (PHOBIUS); IPR016090 (SUPERFAMILY); TMhelix (TMHMM); TMhelix (TMHMM); TMhelix (TMHMM); TMhelix (TMHMM); TMhelix (TMHMM); TMhelix (TMHMM) |
| 1732 | 494230_length_2433_cvg_32.0_tip_1_0 | 1145  | beta- -n-acetylgalactosaminyltransferase bre-4                                       | 811 | 1.40E-121 | 66.60% | 0.323 | IPR003859 (PRINTS); IPR027791 (PFAM); IPR029044 (G3DSA:3.90.550.GENE3D); IPR009053 (G3DSA:1.10.287.GENE3D); IPR027995 (PFAM); IPR004127 (PFAM); IPR003859 (PANTHER); PTHR19300:SF30 (PANTHER); TRANSMEMBRANE (PHOBIUS); TRANSMEMBRANE (PHOBIUS); NON_CYTOPLASMIC_DOMAIN (PHOBIUS); CYTOPLASMIC_DOMAIN (PHOBIUS); CYTOPLASMIC_DOMAIN (PHOBIUS); IPR009053 (SUPERFAMILY); IPR029044 (SUPERFAMILY); TMhelix (TMHMM)                                                                                                                                                                                                                            |
| 1733 | 494232_length_2433_cvg_9.6_tip_1_1  | 137   | carboxypeptidase e                                                                   | 811 | 0         | 73.90% | 0.138 | IPR000834 (PRINTS); IPR000834 (SMART); IPR014766 (G3DSA:2.60.40.GENE3D); PF13620 (PFAM); IPR000834 (PFAM); G3DSA:3.40.630.10 (GENE3D); PTHR11532:SF41 (PANTHER); PTHR11532 (PANTHER); IPR000834 (PROSITE_PATTERNS); IPR000834 (PROSITE_PATTERNS); TRANSMEMBRANE (PHOBIUS); CYTOPLASMIC_DOMAIN (PHOBIUS); CYTOPLASMIC_DOMAIN (PHOBIUS); TRANSMEMBRANE (PHOBIUS); NON_CYTOPLASMIC_DOMAIN (PHOBIUS); TRANSMEMBRANE (PHOBIUS); TRANSMEMBRANE (PHOBIUS); NON_CYTOPLASMIC_DOMAIN (PHOBIUS); NON_CYTOPLASMIC_DOMAIN (PHOBIUS); SSF53187 (SUPERFAMILY); IPR008969 (SUPERFAMILY); TMhelix (TMHMM); TMhelix (TMHMM)                                   |
| 1734 | 494234_length_2434_cvg_63.2_tip_1_3 | 1092  | pdgf- and vegf-related factor 1-like precursor                                       | 812 | 7.84E-53  | 55.80% | 0.159 | IPR000072 (SMART); IPR000072 (PFAM); IPR029034 (G3DSA:2.10.90.GENE3D); PTHR11633 (PANTHER); PTHR11633:SF1 (PANTHER); CYTOPLASMIC_DOMAIN (PHOBIUS); TRANSMEMBRANE (PHOBIUS); TRANSMEMBRANE (PHOBIUS); CYTOPLASMIC_DOMAIN (PHOBIUS); NON_CYTOPLASMIC_DOMAIN (PHOBIUS); NON_CYTOPLASMIC_DOMAIN (PHOBIUS); NON_CYTOPLASMIC_DOMAIN (PHOBIUS); TRANSMEMBRANE (PHOBIUS); TRANSMEMBRANE (PHOBIUS); IPR000072 (PROSITE_PROFILES); IPR029034 (SUPERFAMILY); TMhelix (TMHMM); TMhelix (TMHMM); TMhelix (TMHMM); TMhelix (TMHMM)                                                                                                                        |
| 1741 | 494322_length_2472_cvg_12.8_tip_1_2 | 170   | mitogen-activated protein kinase 15-like                                             | 814 | 0         | 73.00% | 0.151 | G3DSA:1.10.510.10 (GENE3D); IPR000719 (PFAM); G3DSA:3.30.200.20 (GENE3D); PTHR24055:SF79 (PANTHER); PTHR24055 (PANTHER); IPR017441 (PROSITE_PATTERNS); IPR003527 (PROSITE_PATTERNS); TRANSMEMBRANE (PHOBIUS); NON_CYTOPLASMIC_DOMAIN (PHOBIUS); CYTOPLASMIC_DOMAIN (PHOBIUS); TRANSMEMBRANE (PHOBIUS); TRANSMEMBRANE (PHOBIUS); NON_CYTOPLASMIC_DOMAIN (PHOBIUS); IPR000719 (PROSITE_PROFILES); IPR011009 (SUPERFAMILY); TMhelix (TMHMM); TMhelix (TMHMM)                                                                                                                                                                                   |
| 1746 | 494368_length_2489_cvg_89.6_tip_1_0 | 17714 | membrane metallo-endopeptidase-like 1-like                                           | 816 | 0         | 67.50% | 0.146 | IPR018497 (PRINTS); IPR024079 (G3DSA:3.40.390.GENE3D); IPR008753 (PFAM); IPR018497 (PFAM); IPR000718 (PANTHER); PTHR11733:SF113 (PANTHER); NON_CYTOPLASMIC_DOMAIN (PHOBIUS); NON_CYTOPLASMIC_DOMAIN (PHOBIUS); TRANSMEMBRANE (PHOBIUS); TRANSMEMBRANE (PHOBIUS); CYTOPLASMIC_DOMAIN (PHOBIUS); SSF55486 (SUPERFAMILY); TMhelix (TMHMM); TMhelix (TMHMM)                                                                                                                                                                                                                                                                                     |

|      |                                     |       |                                                                  |     |           |        |       |                                                                                                                                                                                                                                                                                                                                                                                                                                                                                                                                                                                                                                                                                                                                              |
|------|-------------------------------------|-------|------------------------------------------------------------------|-----|-----------|--------|-------|----------------------------------------------------------------------------------------------------------------------------------------------------------------------------------------------------------------------------------------------------------------------------------------------------------------------------------------------------------------------------------------------------------------------------------------------------------------------------------------------------------------------------------------------------------------------------------------------------------------------------------------------------------------------------------------------------------------------------------------------|
| 1737 | 494290_length_2454_cvg_4.2_tip_1_1  | 97    | ectonucleoside triphosphate diphosphohydrolase 2-like isoform x4 | 818 | 2.62E-105 | 54.30% | 0.168 | IPR000407 (PFAM); IPR000407 (PANTHER); IPR000407 (PROSITE_PATTERNS); CYTOPLASMIC_DOMAIN (PHOBIUS); TRANSMEMBRANE (PHOBIUS); NON_CYTOPLASMIC_DOMAIN (PHOBIUS); TRANSMEMBRANE (PHOBIUS); CYTOPLASMIC_DOMAIN (PHOBIUS); TRANSMEMBRANE (PHOBIUS); NON_CYTOPLASMIC_DOMAIN (PHOBIUS); TMhelix (TMHMM); TMhelix (TMHMM); TMhelix (TMHMM)                                                                                                                                                                                                                                                                                                                                                                                                            |
| 1743 | 494354_length_2483_cvg_12.6_tip_1_4 | 155   | leucine-rich repeat-containing protein 47-like                   | 819 | 8.81E-173 | 67.80% | 0.121 | IPR003591 (SMART); IPR005146 (SMART); SM00364 (SMART); IPR025875 (PFAM); IPR001611 (PFAM); G3DSA:3.80.10.10 (GENE3D); IPR005146 (PFAM); PTHR10947 (PANTHER); PTHR10947:SF2 (PANTHER); NON_CYTOPLASMIC_DOMAIN (PHOBIUS); CYTOPLASMIC_DOMAIN (PHOBIUS); CYTOPLASMIC_DOMAIN (PHOBIUS); TRANSMEMBRANE (PHOBIUS); TRANSMEMBRANE (PHOBIUS); TRANSMEMBRANE (PHOBIUS); NON_CYTOPLASMIC_DOMAIN (PHOBIUS); IPR001611 (PROSITE_PROFILES); IPR001611 (PROSITE_PROFILES); IPR001611 (PROSITE_PROFILES); IPR001611 (PROSITE_PROFILES); IPR001611 (PROSITE_PROFILES); IPR001611 (PROSITE_PROFILES); SSF52058 (SUPERFAMILY)                                                                                                                                  |
| 1738 | 494300_length_2458_cvg_5.1_tip_1_0  | 77    | eukaryotic translation initiation factor 2-alpha kinase 3        | 820 | 1.36E-112 | 52.50% | 0.173 | IPR002290 (SMART); IPR000719 (PFAM); G3DSA:1.10.510.10 (GENE3D); G3DSA:3.30.200.20 (GENE3D); PTHR11042 (PANTHER); PTHR11042:SF86 (PANTHER); IPR017441 (PROSITE_PATTERNS); IPR008271 (PROSITE_PATTERNS); NON_CYTOPLASMIC_DOMAIN (PHOBIUS); CYTOPLASMIC_DOMAIN (PHOBIUS); TRANSMEMBRANE (PHOBIUS); IPR000719 (PROSITE_PROFILES); IPR011009 (SUPERFAMILY); TMhelix (TMHMM)                                                                                                                                                                                                                                                                                                                                                                      |
| 1739 | 494302_length_2458_cvg_66.9_tip_1_3 | 22192 | enolase                                                          | 820 | 0         | 89.50% | 0.196 | IPR000941 (PRINTS); IPR029017 (G3DSA:3.30.390.GENE3D); IPR020811 (PFAM); IPR000941 (TIGRFAM); IPR029065 (G3DSA:3.20.20.GENE3D); IPR020810 (PFAM); IPR000941 (PANTHER); IPR020809 (PROSITE_PATTERNS); TRANSMEMBRANE (PHOBIUS); TRANSMEMBRANE (PHOBIUS); TRANSMEMBRANE (PHOBIUS); NON_CYTOPLASMIC_DOMAIN (PHOBIUS); NON_CYTOPLASMIC_DOMAIN (PHOBIUS); CYTOPLASMIC_DOMAIN (PHOBIUS); CYTOPLASMIC_DOMAIN (PHOBIUS); IPR000941 (HAMAP); IPR029017 (SUPERFAMILY); IPR029065 (SUPERFAMILY); TMhelix (TMHMM); TMhelix (TMHMM); TMhelix (TMHMM)                                                                                                                                                                                                       |
| 1744 | 494356_length_2483_cvg_48.3_tip_1_0 | 1135  | extracellular matrix protein partial                             | 820 | 5.62E-22  | 40.10% | 0.106 | CYTOPLASMIC_DOMAIN (PHOBIUS); TRANSMEMBRANE (PHOBIUS); NON_CYTOPLASMIC_DOMAIN (PHOBIUS); IPR001007 (PROSITE_PROFILES); IPR006207 (PROSITE_PROFILES); TMhelix (TMHMM)                                                                                                                                                                                                                                                                                                                                                                                                                                                                                                                                                                         |
| 1740 | 494320_length_2472_cvg_63.9_tip_1_1 | 837   | zinc metalloproteinase nas-13-like isoform 1                     | 824 | 7.99E-133 | 54.80% | 0.291 | IPR001506 (PRINTS); IPR003582 (SMART); IPR006026 (SMART); IPR001506 (PFAM); IPR024079 (G3DSA:3.40.390.GENE3D); IPR003582 (PFAM); PTHR10127 (PANTHER); PTHR10127:SF550 (PANTHER); TRANSMEMBRANE (PHOBIUS); TRANSMEMBRANE (PHOBIUS); CYTOPLASMIC_DOMAIN (PHOBIUS); TRANSMEMBRANE (PHOBIUS); CYTOPLASMIC_DOMAIN (PHOBIUS); NON_CYTOPLASMIC_DOMAIN (PHOBIUS); NON_CYTOPLASMIC_DOMAIN (PHOBIUS); NON_CYTOPLASMIC_DOMAIN (PHOBIUS); TRANSMEMBRANE (PHOBIUS); TRANSMEMBRANE (PHOBIUS); TRANSMEMBRANE (PHOBIUS); CYTOPLASMIC_DOMAIN (PHOBIUS); NON_CYTOPLASMIC_DOMAIN (PHOBIUS); IPR003582 (PROSITE_PROFILES); IPR003582 (PROSITE_PROFILES); IPR003582 (PROSITE_PROFILES); SSF55486 (SUPERFAMILY); TMhelix (TMHMM); TMhelix (TMHMM); TMhelix (TMHMM) |
| 1754 | 494442_length_2523_cvg_56.4_tip_1_0 | 863   | alpha beta hydrolase domain-containing protein 13                | 824 | 1.76E-137 | 75.10% | 0.129 | IPR029058 (G3DSA:3.40.50.GENE3D); IPR029059 (PFAM); PTHR12277 (PANTHER); CYTOPLASMIC_DOMAIN (PHOBIUS); NON_CYTOPLASMIC_DOMAIN (PHOBIUS); TRANSMEMBRANE (PHOBIUS); TRANSMEMBRANE (PHOBIUS); NON_CYTOPLASMIC_DOMAIN (PHOBIUS); CYTOPLASMIC_DOMAIN (PHOBIUS); CYTOPLASMIC_DOMAIN (PHOBIUS); TRANSMEMBRANE (PHOBIUS); TRANSMEMBRANE (PHOBIUS); TRANSMEMBRANE (PHOBIUS); NON_CYTOPLASMIC_DOMAIN (PHOBIUS); NON_CYTOPLASMIC_DOMAIN (PHOBIUS); CYTOPLASMIC_DOMAIN (PHOBIUS); CYTOPLASMIC_DOMAIN (PHOBIUS); TRANSMEMBRANE (PHOBIUS); IPR029058 (SUPERFAMILY); TMhelix (TMHMM); TMhelix (TMHMM); TMhelix (TMHMM)                                                                                                                                      |



|      |                                     |      |                                     |     |           |        |         |                                                                                                                                                                                                                                                                                                                                                                                                                                                                                                                                                                                                                                                       |
|------|-------------------------------------|------|-------------------------------------|-----|-----------|--------|---------|-------------------------------------------------------------------------------------------------------------------------------------------------------------------------------------------------------------------------------------------------------------------------------------------------------------------------------------------------------------------------------------------------------------------------------------------------------------------------------------------------------------------------------------------------------------------------------------------------------------------------------------------------------|
| 1742 | 494342_length_2478_cvg_16.0_tip_1_0 | 193  | n-sulphoglucosamine partial         | 826 | 0         | 78.30% | 0.127   | Coil (COILS); IPR000917 (PFAM); IPR017849 (G3DSA:3.40.720.GENE3D); G3DSA:3.30.1120.10 (GENE3D); PTHR10342 (PANTHER); PTHR10342:SF76 (PANTHER); IPR024607 (PROSITE_PATTERNS); TRANSMEMBRANE (PHOBIUS); TRANSMEMBRANE (PHOBIUS); NON_CYTOPLASMIC_DOMAIN (PHOBIUS); CYTOPLASMIC_DOMAIN (PHOBIUS); TRANSMEMBRANE (PHOBIUS); CYTOPLASMIC_DOMAIN (PHOBIUS); NON_CYTOPLASMIC_DOMAIN (PHOBIUS); CYTOPLASMIC_DOMAIN (PHOBIUS); NON_CYTOPLASMIC_DOMAIN (PHOBIUS); TRANSMEMBRANE (PHOBIUS); TRANSMEMBRANE (PHOBIUS); IPR017850 (SUPERFAMILY)                                                                                                                     |
| 1750 | 494414_length_2513_cvg_14.3_tip_1_2 | 223  | inversin-like isoform x3            | 827 | 1.96E-58  | 74.30% | 0.219   | IPR002110 (SMART); IPR000048 (SMART); IPR000048 (PFAM); IPR020683 (PFAM); IPR020683 (G3DSA:1.25.40.GENE3D); PTHR24178 (PANTHER); CYTOPLASMIC_DOMAIN (PHOBIUS); NON_CYTOPLASMIC_DOMAIN (PHOBIUS); TRANSMEMBRANE (PHOBIUS); IPR002110 (PROSITE_PROFILES); IPR020683 (PROSITE_PROFILES); IPR002110 (PROSITE_PROFILES); IPR000048 (PROSITE_PROFILES); IPR020683 (SUPERFAMILY)                                                                                                                                                                                                                                                                             |
| 1745 | 494366_length_2486_cvg_10.5_tip_1_3 | 109  | group 3 secretory phospholipase a2  | 829 | 1.07E-45  | 68.30% | 0.137   | IPR001211 (PFAM); IPR016090 (G3DSA:1.20.90.GENE3D); PTHR12253 (PANTHER); IPR016090 (SUPERFAMILY)                                                                                                                                                                                                                                                                                                                                                                                                                                                                                                                                                      |
| 1752 | 494420_length_2515_cvg_60.2_tip_1_3 | 1991 | hemocyanin subunit type 2 precursor | 830 | 0         | 73.10% | 0.881 Y | IPR013788 (PRINTS); IPR005203 (PFAM); IPR000896 (PFAM); IPR005204 (PFAM); IPR005204 (G3DSA:1.20.1370.GENE3D); IPR008922 (G3DSA:1.10.1280.GENE3D); IPR005203 (G3DSA:2.60.40.GENE3D); IPR013788 (PANTHER); IPR013788 (PROSITE_PATTERNS); IPR002227 (PROSITE_PATTERNS); IPR013788 (PROSITE_PATTERNS); SIGNAL_PEPTIDE_C_REGION (PHOBIUS); NON_CYTOPLASMIC_DOMAIN (PHOBIUS); SIGNAL_PEPTIDE_N_REGION (PHOBIUS); SIGNAL_PEPTIDE_H_REGION (PHOBIUS); CYTOPLASMIC_DOMAIN (PHOBIUS); TRANSMEMBRANE (PHOBIUS); SIGNAL_PEPTIDE (PHOBIUS); SignalP-noTM (SIGNALP_EUK); IPR008922 (SUPERFAMILY); IPR014756 (SUPERFAMILY); IPR005204 (SUPERFAMILY); TMhelix (TMHMM) |
| 1747 | 494378_length_2498_cvg_32.0_tip_1_4 | 374  | e3 ubiquitin-protein ligase hakai   | 833 | 6.69E-75  | 74.20% | 0.326   | PTHR13480:SF0 (PANTHER); PTHR13480 (PANTHER); IPR017907 (PROSITE_PATTERNS); CYTOPLASMIC_DOMAIN (PHOBIUS); NON_CYTOPLASMIC_DOMAIN (PHOBIUS); TRANSMEMBRANE (PHOBIUS); TRANSMEMBRANE (PHOBIUS); CYTOPLASMIC_DOMAIN (PHOBIUS); TRANSMEMBRANE (PHOBIUS); TRANSMEMBRANE (PHOBIUS); NON_CYTOPLASMIC_DOMAIN (PHOBIUS); NON_CYTOPLASMIC_DOMAIN (PHOBIUS); IPR001841 (PROSITE_PROFILES); SSF57850 (SUPERFAMILY); TMhelix (TMHMM); TMhelix (TMHMM); TMhelix (TMHMM); TMhelix (TMHMM)                                                                                                                                                                            |
| 1748 | 494396_length_2502_cvg_14.6_tip_1_3 | 177  | glucosylceramidase-like             | 834 | 3.74E-180 | 66.20% | 0.111   | IPR001139 (PRINTS); IPR013781 (G3DSA:3.20.20.GENE3D); IPR001139 (PFAM); IPR013780 (G3DSA:2.60.40.GENE3D); PTHR11069:SF7 (PANTHER); IPR001139 (PANTHER); NON_CYTOPLASMIC_DOMAIN (PHOBIUS); TRANSMEMBRANE (PHOBIUS); CYTOPLASMIC_DOMAIN (PHOBIUS); TRANSMEMBRANE (PHOBIUS); TRANSMEMBRANE (PHOBIUS); CYTOPLASMIC_DOMAIN (PHOBIUS); NON_CYTOPLASMIC_DOMAIN (PHOBIUS); IPR017853 (SUPERFAMILY); SSF51011 (SUPERFAMILY)                                                                                                                                                                                                                                    |
| 1749 | 494412_length_2512_cvg_4.6_tip_1_2  | 72   | telomerase protein component 1-like | 837 | 2.62E-36  | 42.10% | 0.101   | IPR020472 (PRINTS); IPR001680 (SMART); IPR015943 (G3DSA:2.130.10.GENE3D); IPR001680 (PFAM); IPR015943 (G3DSA:2.130.10.GENE3D); PTHR22847 (PANTHER); IPR019775 (PROSITE_PATTERNS); IPR001680 (PROSITE_PROFILES); IPR001680 (PROSITE_PROFILES); IPR001680 (PROSITE_PROFILES); IPR001680 (PROSITE_PROFILES); IPR017986 (PROSITE_PROFILES); IPR001680 (PROSITE_PROFILES); IPR017986 (PROSITE_PROFILES); IPR001680 (PROSITE_PROFILES); IPR017986 (SUPERFAMILY); IPR017986 (SUPERFAMILY)                                                                                                                                                                    |



|      |                                     |       |                                                             |     |          |         |         |                                                                                                                                                                                                                                                                                                                                                                                                                                                                                                                                                                                                                                                                                                                                                                                                                                                                                                                                     |
|------|-------------------------------------|-------|-------------------------------------------------------------|-----|----------|---------|---------|-------------------------------------------------------------------------------------------------------------------------------------------------------------------------------------------------------------------------------------------------------------------------------------------------------------------------------------------------------------------------------------------------------------------------------------------------------------------------------------------------------------------------------------------------------------------------------------------------------------------------------------------------------------------------------------------------------------------------------------------------------------------------------------------------------------------------------------------------------------------------------------------------------------------------------------|
| 1756 | 494494_length_2568_cvg_55.2_tip_1_5 | 17610 | suppressor of tumorigenicity 14 partial                     | 856 | 2.10E-67 | 53.40%  | 0.738 Y | IPR002172 (PRINTS); IPR001254 (SMART); IPR002172 (SMART); IPR002172 (PFAM); G3DSA:2.40.10.10 (GENE3D); IPR001254 (PFAM); G3DSA:2.40.10.10 (GENE3D); IPR002172 (G3DSA:4.10.400.GENE3D); IPR002172 (G3DSA:4.10.400.GENE3D); G3DSA:2.40.10.10 (GENE3D); PTHR24256 (PANTHER); IPR023415 (PROSITE_PATTERNS); IPR023415 (PROSITE_PATTERNS); IPR023415 (PROSITE_PATTERNS); IPR018114 (PROSITE_PATTERNS); IPR018114 (PROSITE_PATTERNS); SIGNAL_PEPTIDE (PHOBIUS); SIGNAL_PEPTIDE_C_REGION (PHOBIUS); SIGNAL_PEPTIDE_H_REGION (PHOBIUS); SIGNAL_PEPTIDE_N_REGION (PHOBIUS); NON_CYTOPLASMIC_DOMAIN (PHOBIUS); CYTOPLASMIC_DOMAIN (PHOBIUS); TRANSMEMBRANE (PHOBIUS); IPR002172 (PROSITE_PROFILES); IPR002172 (PROSITE_PROFILES); IPR001254 (PROSITE_PROFILES); IPR002172 (PROSITE_PROFILES); SignalP-noTM (SIGNALP_EUK); IPR002172 (SUPERFAMILY); IPR002172 (SUPERFAMILY); IPR002172 (SUPERFAMILY); IPR009003 (SUPERFAMILY); TMhelix (TMHMM) |
| 1757 | 494510_length_2578_cvg_56.0_tip_1_3 | 709   | cathepsin d                                                 | 860 | 0        | 80.70%  | 0.655 Y | IPR001461 (PRINTS); IPR012848 (PFAM); IPR021109 (G3DSA:2.40.70.GENE3D); IPR021109 (G3DSA:2.40.70.GENE3D); IPR001461 (PFAM); PTHR13683:SF230 (PANTHER); IPR001461 (PANTHER); IPR001969 (PROSITE_PATTERNS); IPR001969 (PROSITE_PATTERNS); CYTOPLASMIC_DOMAIN (PHOBIUS); SIGNAL_PEPTIDE_C_REGION (PHOBIUS); NON_CYTOPLASMIC_DOMAIN (PHOBIUS); TRANSMEMBRANE (PHOBIUS); SIGNAL_PEPTIDE_N_REGION (PHOBIUS); TRANSMEMBRANE (PHOBIUS); SIGNAL_PEPTIDE_H_REGION (PHOBIUS); CYTOPLASMIC_DOMAIN (PHOBIUS); SIGNAL_PEPTIDE (PHOBIUS); TRANSMEMBRANE (PHOBIUS); NON_CYTOPLASMIC_DOMAIN (PHOBIUS); SignalP-noTM (SIGNALP_EUK); IPR021109 (SUPERFAMILY); TMhelix (TMHMM); TMhelix (TMHMM)                                                                                                                                                                                                                                                         |
| 1758 | 494518_length_2581_cvg_39.6_tip_1_2 | 714   | tyrosine-protein phosphatase non-receptor type 9 isoform x1 | 860 | 0        | 67.70%  | 0.287   | IPR000242 (PRINTS); IPR003595 (SMART); IPR000242 (SMART); IPR001251 (G3DSA:3.40.525.GENE3D); IPR001251 (PFAM); IPR029021 (G3DSA:3.90.190.GENE3D); IPR000242 (PFAM); PTHR19134:SF232 (PANTHER); PTHR19134 (PANTHER); IPR016130 (PROSITE_PATTERNS); NON_CYTOPLASMIC_DOMAIN (PHOBIUS); NON_CYTOPLASMIC_DOMAIN (PHOBIUS); TRANSMEMBRANE (PHOBIUS); CYTOPLASMIC_DOMAIN (PHOBIUS); TRANSMEMBRANE (PHOBIUS); TRANSMEMBRANE (PHOBIUS); CYTOPLASMIC_DOMAIN (PHOBIUS); IPR000242 (PROSITE_PROFILES); IPR000387 (PROSITE_PROFILES); IPR001251 (PROSITE_PROFILES); IPR029021 (SUPERFAMILY); IPR001251 (SUPERFAMILY)                                                                                                                                                                                                                                                                                                                             |
| 1761 | 494560_length_2635_cvg_10.4_tip_1_4 | 138   | polypeptide n-acetylgalactosaminyltransferase 5 isoform x2  | 870 | 0        | 85.90%  | 0.101   | IPR000772 (SMART); IPR000772 (PFAM); IPR001173 (PFAM); IPR029044 (G3DSA:3.90.550.GENE3D); G3DSA:2.80.10.50 (GENE3D); PTHR11675 (PANTHER); PTHR11675:SF39 (PANTHER); NON_CYTOPLASMIC_DOMAIN (PHOBIUS); CYTOPLASMIC_DOMAIN (PHOBIUS); TRANSMEMBRANE (PHOBIUS); IPR000772 (PROSITE_PROFILES); IPR029044 (SUPERFAMILY); IPR000772 (SUPERFAMILY); TMhelix (TMHMM); TMhelix (TMHMM)                                                                                                                                                                                                                                                                                                                                                                                                                                                                                                                                                       |
| 1760 | 494540_length_2614_cvg_6.6_tip_1_2  | 83    | aminopeptidase n                                            | 871 | 0        | 100.00% | 0.375 Y | IPR014782 (PRINTS); IPR012779 (TIGRFAM); IPR024601 (G3DSA:1.25.50.GENE3D); G3DSA:1.10.390.10 (GENE3D); IPR024601 (PFAM); IPR014782 (PFAM); PTHR11533:SF152 (PANTHER); IPR001930 (PANTHER); SSF63737 (SUPERFAMILY); SSF55486 (SUPERFAMILY)                                                                                                                                                                                                                                                                                                                                                                                                                                                                                                                                                                                                                                                                                           |
| 1763 | 494574_length_2650_cvg_15.9_tip_1_1 | 195   | exocyst complex component 3                                 | 877 | 0        | 74.20%  | 0.135   | Coil (COILS); IPR010326 (PFAM); IPR010326 (PANTHER); PTHR21292:SF1 (PANTHER)                                                                                                                                                                                                                                                                                                                                                                                                                                                                                                                                                                                                                                                                                                                                                                                                                                                        |
| 1765 | 494582_length_2662_cvg_21.5_tip_1_0 | 266   | vitellogenin 2                                              | 879 | 2.10E-66 | 43.80%  | 0.129   | IPR001846 (SMART); IPR015255 (PFAM); IPR001846 (PFAM); PTHR23345:SF1 (PANTHER); PTHR23345 (PANTHER); NON_CYTOPLASMIC_DOMAIN (PHOBIUS); CYTOPLASMIC_DOMAIN (PHOBIUS); TRANSMEMBRANE (PHOBIUS); IPR001846 (PROSITE_PROFILES); IPR015819 (SUPERFAMILY)                                                                                                                                                                                                                                                                                                                                                                                                                                                                                                                                                                                                                                                                                 |
| 1766 | 494590_length_2671_cvg_20.0_tip_1_3 | 260   | zinc finger protein 239- partial                            | 880 | 9.82E-52 | 60.10%  | 0.136   | IPR015880 (SMART); IPR013087 (G3DSA:3.30.160.GENE3D); IPR013087 (G3DSA:3.30.160.GENE3D); PF13912 (PFAM); PF13465 (PFAM); IPR013087 (G3DSA:3.30.160.GENE3D); PTHR24409:SF13 (PANTHER); PTHR24409 (PANTHER); IPR007087 (PROSITE_PATTERNS); IPR007087 (PROSITE_PATTERNS); IPR007087 (PROSITE_PATTERNS); IPR007087 (PROSITE_PATTERNS); NON_CYTOPLASMIC_DOMAIN (PHOBIUS); CYTOPLASMIC_DOMAIN (PHOBIUS); TRANSMEMBRANE (PHOBIUS); IPR007087 (PROSITE_PROFILES); IPR007087 (PROSITE_PROFILES); IPR007087 (PROSITE_PROFILES); IPR007087 (PROSITE_PROFILES); IPR007087 (PROSITE_PROFILES); SSF57667 (SUPERFAMILY); SSF57667 (SUPERFAMILY); SSF57667 (SUPERFAMILY)                                                                                                                                                                                                                                                                            |

|      |                                     |      |                                                          |     |           |        |         |                                                                                                                                                                                                                                                                                                                                                                                                                                                                                                                                                                                                    |
|------|-------------------------------------|------|----------------------------------------------------------|-----|-----------|--------|---------|----------------------------------------------------------------------------------------------------------------------------------------------------------------------------------------------------------------------------------------------------------------------------------------------------------------------------------------------------------------------------------------------------------------------------------------------------------------------------------------------------------------------------------------------------------------------------------------------------|
| 1762 | 494566_length_2642_cvg_17.9_tip_1_3 | 294  | serine threonine-protein phosphatase 6 catalytic subunit | 881 | 0         | 93.80% | 0.164   | IPR006186 (PRINTS); IPR006186 (SMART); IPR029052 (G3DSA:3.60.21.GENE3D); IPR004843 (PFAM); PTHR11668 (PANTHER); PTHR11668:SF24 (PANTHER); IPR006186 (PROSITE_PATTERNS); TRANSMEMBRANE (PHOBIUS); CYTOPLASMIC_DOMAIN (PHOBIUS); NON_CYTOPLASMIC_DOMAIN (PHOBIUS); NON_CYTOPLASMIC_DOMAIN (PHOBIUS); TRANSMEMBRANE (PHOBIUS); IPR029052 (SUPERFAMILY); TMhelix (TMHMM)                                                                                                                                                                                                                               |
| 1764 | 494576_length_2652_cvg_28.8_tip_1_3 | 563  | hemagglutinin                                            | 884 | 6.30E-90  | 66.00% | 0.113   | IPR023612 (PRINTS); IPR007280 (PFAM); IPR013856 (G3DSA:3.10.170.GENE3D); G3DSA:1.10.390.10 (GENE3D); IPR013856 (PFAM); IPR001570 (PFAM); TRANSMEMBRANE (PHOBIUS); NON_CYTOPLASMIC_DOMAIN (PHOBIUS); TRANSMEMBRANE (PHOBIUS); NON_CYTOPLASMIC_DOMAIN (PHOBIUS); TRANSMEMBRANE (PHOBIUS); CYTOPLASMIC_DOMAIN (PHOBIUS); CYTOPLASMIC_DOMAIN (PHOBIUS); TRANSMEMBRANE (PHOBIUS); SSF55486 (SUPERFAMILY); TMhelix (TMHMM); TMhelix (TMHMM); TMhelix (TMHMM); TMhelix (TMHMM); TMhelix (TMHMM); TMhelix (TMHMM); TMhelix (TMHMM)                                                                         |
| 1767 | 494594_length_2687_cvg_54.2_tip_1_0 | 1848 | cell surface protein                                     | 896 | 1.12E-13  | 42.70% | 0.396 Y | NON_CYTOPLASMIC_DOMAIN (PHOBIUS); NON_CYTOPLASMIC_DOMAIN (PHOBIUS); CYTOPLASMIC_DOMAIN (PHOBIUS); TRANSMEMBRANE (PHOBIUS); TRANSMEMBRANE (PHOBIUS); TRANSMEMBRANE (PHOBIUS); CYTOPLASMIC_DOMAIN (PHOBIUS); NON_CYTOPLASMIC_DOMAIN (PHOBIUS); CYTOPLASMIC_DOMAIN (PHOBIUS); TRANSMEMBRANE (PHOBIUS); TMhelix (TMHMM); TMhelix (TMHMM); TMhelix (TMHMM)                                                                                                                                                                                                                                              |
| 1768 | 494602_length_2700_cvg_12.4_tip_1_2 | 138  | #NAME?                                                   | 900 | 1.50E-116 | 99.80% | 0.17    | IPR002180 (PFAM); IPR002180 (TIGRFAM); IPR000728 (PFAM); IPR016188 (G3DSA:3.30.1330.GENE3D); IPR002180 (G3DSA:3.40.50.GENE3D); IPR002180 (PANTHER); PTHR21058:SF0 (PANTHER); IPR002180 (HAMAP); IPR016188 (SUPERFAMILY); IPR002180 (SUPERFAMILY)                                                                                                                                                                                                                                                                                                                                                   |
| 1770 | 494614_length_2713_cvg_32.5_tip_1_3 | 433  | zinc finger protein                                      | 900 | 5.30E-30  | 51.80% | 0.121   | Coil (COILS); IPR015880 (SMART); IPR013087 (G3DSA:3.30.160.GENE3D); IPR013087 (G3DSA:3.30.160.GENE3D); PF13894 (PFAM); PF13465 (PFAM); PTHR24409:SF14 (PANTHER); PTHR24409 (PANTHER); IPR007087 (PROSITE_PATTERNS); IPR007087 (PROSITE_PATTERNS); IPR007087 (PROSITE_PATTERNS); IPR007087 (PROSITE_PATTERNS); IPR007087 (PROSITE_PROFILES); IPR007087 (PROSITE_PROFILES); IPR007087 (PROSITE_PROFILES); IPR007087 (PROSITE_PROFILES); SSF57667 (SUPERFAMILY); SSF57667 (SUPERFAMILY)                                                                                                               |
| 1769 | 494604_length_2701_cvg_15.9_tip_1_3 | 231  | dnaj homolog subfamily b member 11                       | 901 | 0         | 84.50% | 0.733 Y | IPR001623 (PRINTS); IPR001623 (SMART); IPR002939 (PFAM); G3DSA:2.60.260.20 (GENE3D); IPR001623 (G3DSA:1.10.287.GENE3D); G3DSA:2.60.260.20 (GENE3D); IPR001623 (PFAM); PTHR24077 (PANTHER); PTHR24077:SF210 (PANTHER); IPR018253 (PROSITE_PATTERNS); TRANSMEMBRANE (PHOBIUS); TRANSMEMBRANE (PHOBIUS); NON_CYTOPLASMIC_DOMAIN (PHOBIUS); TRANSMEMBRANE (PHOBIUS); NON_CYTOPLASMIC_DOMAIN (PHOBIUS); CYTOPLASMIC_DOMAIN (PHOBIUS); CYTOPLASMIC_DOMAIN (PHOBIUS); IPR001623 (PROSITE_PROFILES); SignalP-noTM (SIGNALP_EUK); IPR008971 (SUPERFAMILY); IPR008971 (SUPERFAMILY); IPR001623 (SUPERFAMILY) |
| 1771 | 494624_length_2732_cvg_3.2_tip_1_0  | 52   | cd109 antigen                                            | 911 | 0         | 64.00% | 0.105   | IPR008930 (G3DSA:1.50.10.GENE3D); IPR011626 (PFAM); PTHR11412 (PANTHER); PTHR11412:SF85 (PANTHER); IPR008930 (SUPERFAMILY)                                                                                                                                                                                                                                                                                                                                                                                                                                                                         |
| 1772 | 494632_length_2737_cvg_7.2_tip_1_0  | 122  | kr domain protein                                        | 913 | 5.29E-148 | 99.00% | 0.359 Y | IPR002347 (PRINTS); IPR002198 (PRINTS); IPR002198 (PFAM); IPR016040 (G3DSA:3.40.50.GENE3D); PTHR24322:SF265 (PANTHER); PTHR24322 (PANTHER); IPR020904 (PROSITE_PATTERNS); SSF51735 (SUPERFAMILY)                                                                                                                                                                                                                                                                                                                                                                                                   |
| 1773 | 494646_length_2769_cvg_9.7_tip_1_2  | 134  | fimbrial family protein                                  | 923 | 3.44E-120 | 99.50% | 0.734 Y | IPR000259 (G3DSA:2.60.40.GENE3D); IPR000259 (PFAM); NON_CYTOPLASMIC_DOMAIN (PHOBIUS); SIGNAL_PEPTIDE_C_REGION (PHOBIUS); SIGNAL_PEPTIDE_H_REGION (PHOBIUS); SIGNAL_PEPTIDE (PHOBIUS); SIGNAL_PEPTIDE_N_REGION (PHOBIUS); SignalP-noTM (SIGNALP_GRAM_NEGATIVE); SignalP-noTM (SIGNALP_EUK); IPR008966 (SUPERFAMILY)                                                                                                                                                                                                                                                                                 |
| 1774 | 494648_length_2772_cvg_6.8_tip_1_0  | 156  | angiotensin-converting enzyme-like                       | 924 | 2.05E-162 | 61.70% | 0.271   | Coil (COILS); IPR001548 (PRINTS); IPR001548 (PFAM); IPR001548 (PANTHER); TRANSMEMBRANE (PHOBIUS); CYTOPLASMIC_DOMAIN (PHOBIUS); NON_CYTOPLASMIC_DOMAIN (PHOBIUS); SSF55486 (SUPERFAMILY); TMhelix (TMHMM)                                                                                                                                                                                                                                                                                                                                                                                          |
| 1775 | 494654_length_2789_cvg_49.8_tip_1_1 | 9780 | intestinal mucin-like                                    | 930 | 1.59E-24  | 40.90% | 0.1     | IPR006207 (SMART); IPR001007 (SMART); IPR001007 (PFAM); IPR001007 (PROSITE_PATTERNS); TRANSMEMBRANE (PHOBIUS); NON_CYTOPLASMIC_DOMAIN (PHOBIUS); CYTOPLASMIC_DOMAIN (PHOBIUS); IPR001007 (PROSITE_PROFILES); IPR006207 (PROSITE_PROFILES)                                                                                                                                                                                                                                                                                                                                                          |

|      |                                     |      |                                                          |     |           |        |       |                                                                                                                                                                                                                                                                                                                                                                                                                                                                                                                                                                                                                                                                                                                                                                                                                                                                                                                                                                                                                                                                                                                      |
|------|-------------------------------------|------|----------------------------------------------------------|-----|-----------|--------|-------|----------------------------------------------------------------------------------------------------------------------------------------------------------------------------------------------------------------------------------------------------------------------------------------------------------------------------------------------------------------------------------------------------------------------------------------------------------------------------------------------------------------------------------------------------------------------------------------------------------------------------------------------------------------------------------------------------------------------------------------------------------------------------------------------------------------------------------------------------------------------------------------------------------------------------------------------------------------------------------------------------------------------------------------------------------------------------------------------------------------------|
| 1776 | 494658_length_2792_cvg_37.7_tip_1_0 | 450  | map kinase-interacting serine threonine-protein kinase 1 | 931 | 0         | 81.40% | 0.12  | IPR002290 (SMART); G3DSA:1.10.510.10 (GENE3D); IPR000719 (PFAM); G3DSA:3.30.200.20 (GENE3D); PTHR24349 (PANTHER); IPR008271 (PROSITE_PATTERNS); TRANSMEMBRANE (PHOBIUS); TRANSMEMBRANE (PHOBIUS); NON_CYTOPLASMIC_DOMAIN (PHOBIUS); NON_CYTOPLASMIC_DOMAIN (PHOBIUS); CYTOPLASMIC_DOMAIN (PHOBIUS); IPR000719 (PROSITE_PROFILES); IPR011009 (SUPERFAMILY)                                                                                                                                                                                                                                                                                                                                                                                                                                                                                                                                                                                                                                                                                                                                                            |
| 1778 | 494688_length_2881_cvg_24.9_tip_1_2 | 642  | hemocytin isoform x1                                     | 951 | 3.85E-26  | 41.20% | 0.118 | NON_CYTOPLASMIC_DOMAIN (PHOBIUS); NON_CYTOPLASMIC_DOMAIN (PHOBIUS); CYTOPLASMIC_DOMAIN (PHOBIUS); TRANSMEMBRANE (PHOBIUS); TRANSMEMBRANE (PHOBIUS); IPR006207 (PROSITE_PROFILES); TMhelix (TMHMM); TMhelix (TMHMM)                                                                                                                                                                                                                                                                                                                                                                                                                                                                                                                                                                                                                                                                                                                                                                                                                                                                                                   |
| 1777 | 494686_length_2881_cvg_32.9_tip_1_0 | 1056 | gamma-glutamyltransferase 7                              | 961 | 1.91E-108 | 54.80% | 0.225 | IPR000101 (PRINTS); IPR000101 (PFAM); PTHR11686:SF18 (PANTHER); IPR000101 (PANTHER); TRANSMEMBRANE (PHOBIUS); NON_CYTOPLASMIC_DOMAIN (PHOBIUS); TRANSMEMBRANE (PHOBIUS); CYTOPLASMIC_DOMAIN (PHOBIUS); CYTOPLASMIC_DOMAIN (PHOBIUS); IPR029055 (SUPERFAMILY); TMhelix (TMHMM)                                                                                                                                                                                                                                                                                                                                                                                                                                                                                                                                                                                                                                                                                                                                                                                                                                        |
| 1780 | 494714_length_2926_cvg_18.0_tip_1_4 | 327  | vitellogenin receptor                                    | 967 | 3.98E-83  | 45.10% | 0.106 | IPR002172 (PRINTS); IPR002172 (SMART); IPR001881 (SMART); IPR000033 (SMART); IPR000742 (SMART); G3DSA:2.10.25.10 (GENE3D); IPR002172 (G3DSA:4.10.400.GENE3D); G3DSA:2.10.25.10 (GENE3D); IPR001881 (PFAM); IPR002172 (G3DSA:4.10.400.GENE3D); IPR002172 (G3DSA:4.10.400.GENE3D); IPR002172 (PFAM); IPR011042 (G3DSA:2.120.10.GENE3D); PTHR10529 (PANTHER); PTHR10529:SF204 (PANTHER); IPR023415 (PROSITE_PATTERNS); IPR018097 (PROSITE_PATTERNS); IPR023415 (PROSITE_PATTERNS); IPR000152 (PROSITE_PATTERNS); IPR013032 (PROSITE_PATTERNS); IPR013032 (PROSITE_PATTERNS); IPR023415 (PROSITE_PATTERNS); IPR023415 (PROSITE_PATTERNS); NON_CYTOPLASMIC_DOMAIN (PHOBIUS); CYTOPLASMIC_DOMAIN (PHOBIUS); TRANSMEMBRANE (PHOBIUS); IPR002172 (PROSITE_PROFILES); IPR000742 (PROSITE_PROFILES); IPR000033 (PROSITE_PROFILES); IPR002172 (PROSITE_PROFILES); IPR000033 (PROSITE_PROFILES); IPR000033 (PROSITE_PROFILES); IPR002172 (PROSITE_PROFILES); SSF57196 (SUPERFAMILY); IPR002172 (SUPERFAMILY); IPR002172 (SUPERFAMILY); SSF63825 (SUPERFAMILY); IPR002172 (SUPERFAMILY); IPR002172 (SUPERFAMILY); TMhelix (TMHMM) |
| 1779 | 494712_length_2921_cvg_36.2_tip_1_5 | 512  | titin- partial                                           | 973 | 3.93E-148 | 72.50% | 0.111 | PR00014 (PRINTS); IPR003961 (SMART); IPR013783 (G3DSA:2.60.40.GENE3D); IPR013783 (G3DSA:2.60.40.GENE3D); IPR003961 (PFAM); PTHR19897 (PANTHER); PTHR19897:SF142 (PANTHER); NON_CYTOPLASMIC_DOMAIN (PHOBIUS); TRANSMEMBRANE (PHOBIUS); CYTOPLASMIC_DOMAIN (PHOBIUS); CYTOPLASMIC_DOMAIN (PHOBIUS); NON_CYTOPLASMIC_DOMAIN (PHOBIUS); TRANSMEMBRANE (PHOBIUS); TRANSMEMBRANE (PHOBIUS); IPR003961 (PROSITE_PROFILES); IPR003961 (PROSITE_PROFILES); IPR003961 (PROSITE_PROFILES); IPR003961 (PROSITE_PROFILES); IPR003961 (SUPERFAMILY); IPR003961 (SUPERFAMILY); TMhelix (TMHMM); TMhelix (TMHMM); TMhelix (TMHMM)                                                                                                                                                                                                                                                                                                                                                                                                                                                                                                    |
| 1781 | 494728_length_2965_cvg_14.9_tip_1_3 | 200  | transducin beta-like protein 3                           | 974 | 9.14E-175 | 69.00% | 0.103 | Coil (COILS); Coil (COILS); IPR020472 (PRINTS); IPR001680 (SMART); IPR013934 (PFAM); IPR015943 (G3DSA:2.130.10.GENE3D); IPR001680 (PFAM); PTHR19854 (PANTHER); PTHR19854:SF15 (PANTHER); CYTOPLASMIC_DOMAIN (PHOBIUS); NON_CYTOPLASMIC_DOMAIN (PHOBIUS); NON_CYTOPLASMIC_DOMAIN (PHOBIUS); TRANSMEMBRANE (PHOBIUS); TRANSMEMBRANE (PHOBIUS); TRANSMEMBRANE (PHOBIUS); CYTOPLASMIC_DOMAIN (PHOBIUS); IPR001680 (PROSITE_PROFILES); IPR001680 (PROSITE_PROFILES); IPR017986 (PROSITE_PROFILES); IPR001680 (PROSITE_PROFILES); IPR001680 (PROSITE_PROFILES); IPR001680 (PROSITE_PROFILES); IPR001680 (PROSITE_PROFILES); IPR017986 (SUPERFAMILY)                                                                                                                                                                                                                                                                                                                                                                                                                                                                        |
| 1782 | 494732_length_2973_cvg_42.5_tip_1_0 | 2428 | receptor-type tyrosine-protein phosphatase n2            | 991 | 0         | 87.30% | 0.232 | IPR000242 (PRINTS); IPR000242 (SMART); IPR003595 (SMART); IPR000242 (PFAM); IPR029021 (G3DSA:3.90.190.GENE3D); PTHR19134:SF2 (PANTHER); PTHR19134 (PANTHER); IPR016130 (PROSITE_PATTERNS); TRANSMEMBRANE (PHOBIUS); NON_CYTOPLASMIC_DOMAIN (PHOBIUS); CYTOPLASMIC_DOMAIN (PHOBIUS); NON_CYTOPLASMIC_DOMAIN (PHOBIUS); TRANSMEMBRANE (PHOBIUS); IPR000242 (PROSITE_PROFILES); IPR000387 (PROSITE_PROFILES); IPR029021 (SUPERFAMILY); TMhelix (TMHMM); TMhelix (TMHMM)                                                                                                                                                                                                                                                                                                                                                                                                                                                                                                                                                                                                                                                 |



|      |                                     |       |                                                                         |      |          |        |       |                                                                                                                                                                                                                                                                                                                                                                                                                                                                                                                                                                                                                                                                                                                                                                                                                                                                            |
|------|-------------------------------------|-------|-------------------------------------------------------------------------|------|----------|--------|-------|----------------------------------------------------------------------------------------------------------------------------------------------------------------------------------------------------------------------------------------------------------------------------------------------------------------------------------------------------------------------------------------------------------------------------------------------------------------------------------------------------------------------------------------------------------------------------------------------------------------------------------------------------------------------------------------------------------------------------------------------------------------------------------------------------------------------------------------------------------------------------|
| 1784 | 494748_length_3081_cvg_12.5_tip_1_4 | 231   | serine threonine-protein phosphatase 2a catalytic subunit alpha isoform | 1018 | 0        | 97.10% | 0.1   | Coil (COILS); IPR006186 (PRINTS); IPR006186 (SMART); IPR004843 (PFAM); IPR029052 (G3DSA:3.60.21.GENE3D); PTHR11668 (PANTHER); PTHR11668:SF216 (PANTHER); IPR006186 (PROSITE_PATTERNS); NON_CYTOPLASMIC_DOMAIN (PHOBIUS); NON_CYTOPLASMIC_DOMAIN (PHOBIUS); NON_CYTOPLASMIC_DOMAIN (PHOBIUS); CYTOPLASMIC_DOMAIN (PHOBIUS); CYTOPLASMIC_DOMAIN (PHOBIUS); TRANSMEMBRANE (PHOBIUS); TRANSMEMBRANE (PHOBIUS); TRANSMEMBRANE (PHOBIUS); TRANSMEMBRANE (PHOBIUS); TRANSMEMBRANE (PHOBIUS); NON_CYTOPLASMIC_DOMAIN (PHOBIUS); TRANSMEMBRANE (PHOBIUS); IPR029052 (SUPERFAMILY); TMhelix (TMHMM); TMhelix (TMHMM); TMhelix (TMHMM); TMhelix (TMHMM); TMhelix (TMHMM)                                                                                                                                                                                                              |
| 1783 | 494746_length_3076_cvg_16.5_tip_1_5 | 183   | neutral alpha-glucosidase ab-like                                       | 1025 | 0        | 73.80% | 0.125 | IPR025887 (PFAM); IPR000322 (PFAM); PTHR22762 (PANTHER); PTHR22762:SF54 (PANTHER); NON_CYTOPLASMIC_DOMAIN (PHOBIUS); CYTOPLASMIC_DOMAIN (PHOBIUS); TRANSMEMBRANE (PHOBIUS); SSF51011 (SUPERFAMILY); IPR017853 (SUPERFAMILY); IPR011013 (SUPERFAMILY)                                                                                                                                                                                                                                                                                                                                                                                                                                                                                                                                                                                                                       |
| 1785 | 494762_length_3126_cvg_12.6_tip_1_3 | 165   | atp-dependent rna helicase ddx1                                         | 1035 | 0        | 83.50% | 0.14  | IPR014001 (SMART); IPR001650 (SMART); IPR003877 (SMART); IPR027417 (G3DSA:3.40.50.GENE3D); IPR001650 (PFAM); IPR027417 (G3DSA:3.40.50.GENE3D); IPR011545 (PFAM); IPR003877 (PFAM); PTHR24031 (PANTHER); PTHR24031:SF211 (PANTHER); NON_CYTOPLASMIC_DOMAIN (PHOBIUS); TRANSMEMBRANE (PHOBIUS); CYTOPLASMIC_DOMAIN (PHOBIUS); IPR014014 (PROSITE_PROFILES); IPR001650 (PROSITE_PROFILES); IPR001870 (PROSITE_PROFILES); IPR014001 (PROSITE_PROFILES); IPR013320 (SUPERFAMILY); IPR027417 (SUPERFAMILY); IPR027417 (SUPERFAMILY); TMhelix (TMHMM)                                                                                                                                                                                                                                                                                                                             |
| 1786 | 494766_length_3145_cvg_18.6_tip_1_1 | 382   | basement membrane-specific heparan sulfate proteoglycan core protein    | 1048 | 6.20E-96 | 58.40% | 0.102 | IPR003599 (SMART); IPR003598 (SMART); IPR013783 (G3DSA:2.60.40.GENE3D); IPR013783 (G3DSA:2.60.40.GENE3D); IPR013151 (PFAM); IPR013783 (G3DSA:2.60.40.GENE3D); PF13895 (PFAM); IPR013098 (PFAM); IPR013783 (G3DSA:2.60.40.GENE3D); PTHR10489 (PANTHER); CYTOPLASMIC_DOMAIN (PHOBIUS); NON_CYTOPLASMIC_DOMAIN (PHOBIUS); NON_CYTOPLASMIC_DOMAIN (PHOBIUS); TRANSMEMBRANE (PHOBIUS); TRANSMEMBRANE (PHOBIUS); NON_CYTOPLASMIC_DOMAIN (PHOBIUS); TRANSMEMBRANE (PHOBIUS); TRANSMEMBRANE (PHOBIUS); TRANSMEMBRANE (PHOBIUS); CYTOPLASMIC_DOMAIN (PHOBIUS); TRANSMEMBRANE (PHOBIUS); CYTOPLASMIC_DOMAIN (PHOBIUS); TRANSMEMBRANE (PHOBIUS); IPR007110 (PROSITE_PROFILES); IPR007110 (PROSITE_PROFILES); IPR007110 (PROSITE_PROFILES); SSF48726 (SUPERFAMILY); SSF48726 (SUPERFAMILY); SSF48726 (SUPERFAMILY); TMhelix (TMHMM); TMhelix (TMHMM); TMhelix (TMHMM); TMhelix (TMHMM) |
| 1787 | 494770_length_3157_cvg_69.1_tip_1_1 | 12425 | plasminogen activator spa                                               | 1052 | 8.89E-58 | 55.50% | 0.231 | IPR001314 (PRINTS); IPR001254 (SMART); G3DSA:2.40.10.10 (GENE3D); IPR001254 (PFAM); G3DSA:2.40.10.10 (GENE3D); G3DSA:2.40.10.10 (GENE3D); PTHR24276 (PANTHER); IPR018114 (PROSITE_PATTERNS); IPR018114 (PROSITE_PATTERNS); CYTOPLASMIC_DOMAIN (PHOBIUS); NON_CYTOPLASMIC_DOMAIN (PHOBIUS); TRANSMEMBRANE (PHOBIUS); TRANSMEMBRANE (PHOBIUS); TRANSMEMBRANE (PHOBIUS); CYTOPLASMIC_DOMAIN (PHOBIUS); NON_CYTOPLASMIC_DOMAIN (PHOBIUS); IPR001254 (PROSITE_PROFILES); IPR009003 (SUPERFAMILY); TMhelix (TMHMM)                                                                                                                                                                                                                                                                                                                                                               |
| 1788 | 494776_length_3200_cvg_5.9_tip_1_1  | 91    | zinc finger protein                                                     | 1067 | 6.37E-37 | 59.40% | 0.109 | Coil (COILS); IPR015880 (SMART); IPR007087 (PFAM); PF13465 (PFAM); IPR013087 (G3DSA:3.30.160.GENE3D); IPR013087 (G3DSA:3.30.160.GENE3D); PF13894 (PFAM); IPR013087 (G3DSA:3.30.160.GENE3D); PTHR24409:SF14 (PANTHER); PTHR24409 (PANTHER); IPR007087 (PROSITE_PATTERNS); IPR007087 (PROSITE_PATTERNS); IPR007087 (PROSITE_PATTERNS); IPR007087 (PROSITE_PATTERNS); IPR007087 (PROSITE_PATTERNS); TRANSMEMBRANE (PHOBIUS); NON_CYTOPLASMIC_DOMAIN (PHOBIUS); CYTOPLASMIC_DOMAIN (PHOBIUS); IPR007087 (PROSITE_PROFILES); IPR007087 (PROSITE_PROFILES); IPR007087 (PROSITE_PROFILES); IPR007087 (PROSITE_PROFILES); IPR007087 (PROSITE_PROFILES); IPR007087 (PROSITE_PROFILES); SSF57667 (SUPERFAMILY); SSF57667 (SUPERFAMILY); SSF57667 (SUPERFAMILY); SSF57667 (SUPERFAMILY)                                                                                               |

Supplementary Table 5

|      |                                     |        |                                                     |      |           |        |       |                                                                                                                                                                                                                                                                                                                                                                                                                                                                                                                               |
|------|-------------------------------------|--------|-----------------------------------------------------|------|-----------|--------|-------|-------------------------------------------------------------------------------------------------------------------------------------------------------------------------------------------------------------------------------------------------------------------------------------------------------------------------------------------------------------------------------------------------------------------------------------------------------------------------------------------------------------------------------|
| 1794 | 494844_length_3965_cvg_29.6_tip_1_1 | 1103   | neutral and basic amino acid transport protein rbat | 1322 | 3.57E-160 | 56.50% | 0.189 | IPR006589 (SMART); G3DSA:3.90.400.10 (GENE3D); IPR013781 (G3DSA:3.20.20.GENE3D); IPR006047 (PFAM); IPR013780 (G3DSA:2.60.40.GENE3D); PTHR10357:SF77 (PANTHER); IPR015902 (PANTHER); CYTOPLASMIC_DOMAIN (PHOBIUS); TRANSMEMBRANE (PHOBIUS); NON_CYTOPLASMIC_DOMAIN (PHOBIUS); CYTOPLASMIC_DOMAIN (PHOBIUS); TRANSMEMBRANE (PHOBIUS); TRANSMEMBRANE (PHOBIUS); TRANSMEMBRANE (PHOBIUS); NON_CYTOPLASMIC_DOMAIN (PHOBIUS); CYTOPLASMIC_DOMAIN (PHOBIUS); IPR017853 (SUPERFAMILY); TMhelix (TMHMM)                                |
| 1795 | 494846_length_3995_cvg_22.9_tip_1_2 | 2782   | long form-like                                      | 1322 | 0         | 86.30% | 0.123 | Coil (COILS); IPR002928 (PFAM); PTHR13140:SF164 (PANTHER); PTHR13140 (PANTHER); SSF90257 (SUPERFAMILY); SSF90257 (SUPERFAMILY); SSF90257 (SUPERFAMILY); SSF90257 (SUPERFAMILY)                                                                                                                                                                                                                  |
| 1796 | 494848_length_4019_cvg_62.7_tip_1_2 | 179426 | levansucrase                                        | 1339 | 0         | 99.30% | 0.146 | IPR023296 (G3DSA:2.115.10.GENE3D); IPR003469 (PFAM); TRANSMEMBRANE (PHOBIUS); TRANSMEMBRANE (PHOBIUS); TRANSMEMBRANE (PHOBIUS); NON_CYTOPLASMIC_DOMAIN (PHOBIUS); CYTOPLASMIC_DOMAIN (PHOBIUS); TRANSMEMBRANE (PHOBIUS); NON_CYTOPLASMIC_DOMAIN (PHOBIUS); CYTOPLASMIC_DOMAIN (PHOBIUS); NON_CYTOPLASMIC_DOMAIN (PHOBIUS); IPR023296 (SUPERFAMILY); TMhelix (TMHMM)                                                                                                                                                           |
| 1797 | 494848_length_4019_cvg_62.7_tip_1_5 | 179426 | hypothetical protein ECP02989421_5334               | 1339 | 6.03E-84  | 83.90% | 0.119 | Coil (COILS); TRANSMEMBRANE (PHOBIUS); TRANSMEMBRANE (PHOBIUS); TRANSMEMBRANE (PHOBIUS); TRANSMEMBRANE (PHOBIUS); CYTOPLASMIC_DOMAIN (PHOBIUS); NON_CYTOPLASMIC_DOMAIN (PHOBIUS); CYTOPLASMIC_DOMAIN (PHOBIUS); NON_CYTOPLASMIC_DOMAIN (PHOBIUS); CYTOPLASMIC_DOMAIN (PHOBIUS); TRANSMEMBRANE (PHOBIUS); TRANSMEMBRANE (PHOBIUS); NON_CYTOPLASMIC_DOMAIN (PHOBIUS); SignalP-TM (SIGNALP_GRAM_POSITIVE); TMhelix (TMHMM); TMhelix (TMHMM); TMhelix (TMHMM); TMhelix (TMHMM); TMhelix (TMHMM); TMhelix (TMHMM); TMhelix (TMHMM) |
| 1798 | 494854_length_4495_cvg_43.9_tip_1_5 | 7406   | myosin heavy chain isoform 2                        | 1498 | 0         | 90.00% | 0.107 | Coil (COILS); IPR002928 (PFAM); G3DSA:1.20.5.340 (GENE3D); PTHR13140:SF364 (PANTHER); PTHR13140 (PANTHER); CYTOPLASMIC_DOMAIN (PHOBIUS); TRANSMEMBRANE (PHOBIUS); NON_CYTOPLASMIC_DOMAIN (PHOBIUS); SSF90257 (SUPERFAMILY); SSF90257 (SUPERFAMILY); SSF90257 (SUPERFAMILY); SSF90257 (SUPERFAMILY); SSF90257 (SUPERFAMILY); TMhelix (TMHMM)                                                     |

**Supplementary Table 6: Whole body transcriptome (SOAPdenovo-Tran contigs that match against secreted proteins [UniProtSL0243])**

| Nr.  | Contig name                       | Read Numbers | Blast result (evalue= $10^{-5}$ , BlastP, Nr database)       | Seq. length | min. evalue | mean similarity | SignalP | InterProScan                                                                                                                                                                                                                                   |
|------|-----------------------------------|--------------|--------------------------------------------------------------|-------------|-------------|-----------------|---------|------------------------------------------------------------------------------------------------------------------------------------------------------------------------------------------------------------------------------------------------|
| 2290 | 55825_length_139_cvg_14.0_tip_0_5 | 0            | phospholipase b-like 2                                       | 46          | 1.08E-15    | 86.70%          | 0.098   | IPR007000 (PFAM); PTHR12370:SF3 (PANTHER); IPR007000 (PANTHER)                                                                                                                                                                                 |
| 2291 | 55827_length_139_cvg_9.3_tip_0_5  | 0            | phospholipase b-like 2                                       | 46          | 6.75E-13    | 80.90%          | 0.099   | IPR007000 (PFAM)                                                                                                                                                                                                                               |
| 2292 | 56659_length_141_cvg_63.0_tip_0_0 | 0            | ---NA---                                                     | 47          |             |                 | 0.115   | PF14704 (PFAM)                                                                                                                                                                                                                                 |
| 2293 | 56661_length_141_cvg_63.0_tip_0_0 | 0            | hemagglutinin amebocyte aggregation factor                   | 47          | 2.38E-06    | 65.00%          | 0.114   | PF14704 (PFAM)                                                                                                                                                                                                                                 |
| 2294 | 56779_length_141_cvg_8.3_tip_1_4  | 0            | ---NA---                                                     | 47          |             |                 | 0.11    | IPR002223 (G3DSA:4.10.410.GENE3D); IPR002223 (PFAM); IPR002223 (SUPERFAMILY)                                                                                                                                                                   |
| 2296 | 57979_length_142_cvg_2.0_tip_1_1  | 1            | very low-density lipoprotein receptor                        | 47          | 9.80E-12    | 72.90%          | 0.104   | IPR002172 (PFAM); G3DSA:4.10.1220.10 (GENE3D); IPR002172 (G3DSA:4.10.400.GENE3D); IPR002172 (SUPERFAMILY)                                                                                                                                      |
| 2297 | 58471_length_142_cvg_2.0_tip_1_5  | 2            | notch 2                                                      | 47          | 3.22E-07    | 67.00%          | 0.148   | IPR011641 (PFAM)                                                                                                                                                                                                                               |
| 2299 | 59727_length_142_cvg_4.6_tip_1_4  | 2            | dipeptidyl peptidase 1                                       | 47          | 1.59E-16    | 84.20%          | 0.1     | IPR000668 (PFAM); G3DSA:3.90.70.10 (GENE3D); PTHR12411:SF314 (PANTHER); IPR013128 (PANTHER); IPR000169 (PROSITE_PATTERNS); SSF54001 (SUPERFAMILY)                                                                                              |
| 2300 | 59761_length_142_cvg_2.0_tip_1_4  | 1            | reelin-like isoform x4                                       | 47          | 7.42E-08    | 77.89%          | 0.106   | no IPS match                                                                                                                                                                                                                                   |
| 2301 | 60087_length_142_cvg_2.0_tip_1_2  | 2            | tyrosine-protein kinase btk29a                               | 47          | 4.31E-21    | 95.20%          | 0.26    | IPR001245 (PFAM); G3DSA:1.10.510.10 (GENE3D); PTHR24418:SF162 (PANTHER); PTHR24418 (PANTHER); IPR000719 (PROSITE_PROFILES); IPR011009 (SUPERFAMILY)                                                                                            |
| 2302 | 60507_length_142_cvg_2.0_tip_1_1  | 1            | proclotting enzyme                                           | 47          | 1.10E-11    | 75.60%          | 0.138   | IPR001254 (PFAM); G3DSA:2.40.10.10 (GENE3D); PTHR24268 (PANTHER); IPR009003 (SUPERFAMILY)                                                                                                                                                      |
| 2303 | 61187_length_142_cvg_3.0_tip_1_1  | 1            | tachykinins isoform x3                                       | 47          | 3.85E-10    | 76.60%          | 0.107   | no IPS match                                                                                                                                                                                                                                   |
| 2305 | 61595_length_143_cvg_2.0_tip_1_2  | 2            | polypeptide n-acetylgalactosaminyltransferase 5 isoform x2   | 47          | 8.62E-24    | 93.40%          | 0.183   | PTHR11675 (PANTHER); PTHR11675:SF21 (PANTHER)                                                                                                                                                                                                  |
| 2308 | 62575_length_143_cvg_2.6_tip_1_2  | 2            | er degradation-enhancing alpha-mannosidase-like protein 1    | 47          | 2.09E-19    | 92.80%          | 0.095   | IPR001382 (PFAM); IPR001382 (G3DSA:1.50.10.GENE3D); IPR001382 (PANTHER); PTHR11742:SF25 (PANTHER); IPR001382 (SUPERFAMILY)                                                                                                                     |
| 2311 | 63651_length_143_cvg_2.0_tip_1_2  | 2            | xanthine dehydrogenase                                       | 47          | 8.20E-19    | 93.40%          | 0.109   | IPR012675 (G3DSA:3.10.20.GENE3D); PTHR11908 (PANTHER); PTHR11908:SF32 (PANTHER); IPR001041 (SUPERFAMILY)                                                                                                                                       |
| 2312 | 63711_length_143_cvg_4.0_tip_1_2  | 0            | retinol dehydrogenase 14-like                                | 47          | 4.95E-12    | 78.00%          | 0.109   | IPR016040 (G3DSA:3.40.50.GENE3D); PTHR24316:SF305 (PANTHER); PTHR24316 (PANTHER); SSF51735 (SUPERFAMILY)                                                                                                                                       |
| 2314 | 64527_length_143_cvg_2.0_tip_1_2  | 1            | dentin matrix protein 4- partial                             | 47          | 5.03E-21    | 94.80%          | 0.103   | IPR029207 (PFAM); PTHR12450:SF8 (PANTHER); IPR024869 (PANTHER)                                                                                                                                                                                 |
| 2295 | 57913_length_142_cvg_2.0_tip_1_3  | 1            | von willebrand factor a domain-containing protein 8- partial | 48          | 7.13E-19    | 92.20%          | 0.095   | IPR011704 (PFAM); PTHR21610 (PANTHER); PTHR21610:SF9 (PANTHER)                                                                                                                                                                                 |
| 2298 | 59651_length_142_cvg_2.0_tip_1_3  | 2            | protein fam132a                                              | 48          | 3.28E-09    | 77.90%          | 0.2     | no IPS match                                                                                                                                                                                                                                   |
| 2304 | 61511_length_143_cvg_2.0_tip_1_1  | 1            | ---NA---                                                     | 48          |             |                 | 0.156   | no IPS match                                                                                                                                                                                                                                   |
| 2306 | 62125_length_143_cvg_2.9_tip_1_0  | 1            | ubiquitin carboxyl-terminal hydrolase                        | 48          | 9.26E-11    | 68.00%          | 0.104   | no IPS match                                                                                                                                                                                                                                   |
| 2307 | 62573_length_143_cvg_3.0_tip_1_1  | 1            | alpha beta hydrolase domain-containing protein 17c           | 48          | 1.04E-16    | 92.20%          | 0.477 Y | PTHR12277:SF52 (PANTHER); PTHR12277 (PANTHER); SIGNAL_PEPTIDE (PHOBIUS); SIGNAL_PEPTIDE_N_REGION (PHOBIUS); SIGNAL_PEPTIDE_H_REGION (PHOBIUS); NON_CYTOPLASMIC_DOMAIN (PHOBIUS); SIGNAL_PEPTIDE_C_REGION (PHOBIUS); SignalP-noTM (SIGNALP_EUK) |
| 2309 | 63159_length_143_cvg_2.0_tip_1_3  | 2            | matrix metalloproteinase-14-like                             | 48          | 6.04E-20    | 87.80%          | 0.115   | IPR000585 (G3DSA:2.110.10.GENE3D); IPR018487 (PFAM); PTHR10201:SF135 (PANTHER); PTHR10201 (PANTHER); IPR018487 (PROSITE_PROFILES); IPR000585 (SUPERFAMILY)                                                                                     |
| 2310 | 63567_length_143_cvg_2.0_tip_1_0  | 1            | epidermal growth factor receptor isoform x1                  | 48          | 8.09E-21    | 90.40%          | 0.102   | G3DSA:2.10.220.10 (GENE3D); PTHR24416:SF95 (PANTHER); PTHR24416 (PANTHER)                                                                                                                                                                      |
| 2313 | 64021_length_143_cvg_2.0_tip_1_4  | 1            | fic domain-containing partial                                | 48          | 6.07E-21    | 93.80%          | 0.106   | IPR003812 (G3DSA:1.10.3290.GENE3D); IPR003812 (PFAM); PTHR13504:SF12 (PANTHER); PTHR13504 (PANTHER); IPR003812 (PROSITE_PROFILES); IPR003812 (SUPERFAMILY)                                                                                     |
| 2315 | 64691_length_143_cvg_3.0_tip_1_0  | 3            | ring finger and spry domain-containing protein 1-like        | 48          | 2.00E-20    | 92.40%          | 0.098   | PTHR13363 (PANTHER)                                                                                                                                                                                                                            |
| 2316 | 65057_length_144_cvg_2.0_tip_1_2  | 1            | matrix metalloproteinase                                     | 48          | 1.50E-10    | 69.20%          | 0.144   | IPR021190 (PRINTS); IPR001818 (PFAM); IPR024079 (G3DSA:3.40.390.GENE3D); PTHR10201 (PANTHER); SSF55486 (SUPERFAMILY)                                                                                                                           |
| 2317 | 65739_length_144_cvg_3.0_tip_1_2  | 3            | de-cadherin-like isoform x2                                  | 48          | 7.32E-09    | 73.70%          | 0.096   | no IPS match                                                                                                                                                                                                                                   |
| 2318 | 65967_length_144_cvg_2.0_tip_1_5  | 2            | adenylate cyclase type 8 isoform x2                          | 48          | 6.93E-23    | 93.80%          | 0.124   | IPR001054 (G3DSA:3.30.70.GENE3D); IPR001054 (PFAM); PTHR11920:SF236 (PANTHER); PTHR11920 (PANTHER); IPR018297 (PROSITE_PATTERNS); IPR001054 (PROSITE_PROFILES); IPR029787 (SUPERFAMILY)                                                        |

|      |                                   |    |                                                            |    |          |        |       |                                                                                                                                                                                                                                            |
|------|-----------------------------------|----|------------------------------------------------------------|----|----------|--------|-------|--------------------------------------------------------------------------------------------------------------------------------------------------------------------------------------------------------------------------------------------|
| 2319 | 66459_length_144_cvg_2.0_tip_1_2  | 2  | receptor-type tyrosine-protein phosphatase kappa-like      | 48 | 4.22E-16 | 85.10% | 0.1   | IPR000242 (PRINTS); IPR000242 (PFAM); IPR029021 (G3DSA:3.90.190.GENE3D); PTHR19134:SF227 (PANTHER); PTHR19134 (PANTHER); IPR016130 (PROSITE_PATTERNS); IPR000387 (PROSITE_PROFILES); IPR000242 (PROSITE_PROFILES); IPR029021 (SUPERFAMILY) |
| 2320 | 67017_length_144_cvg_2.0_tip_1_0  | 2  | beta- -galactosyltransferase 1-like                        | 48 | 2.83E-12 | 71.60% | 0.103 | IPR027791 (PFAM); IPR029044 (G3DSA:3.90.550.GENE3D); IPR003859 (PANTHER); IPR029044 (SUPERFAMILY)                                                                                                                                          |
| 2321 | 67221_length_144_cvg_2.0_tip_1_1  | 1  | tyrosine-protein kinase transmembrane receptor ror1-like   | 48 | 2.11E-19 | 86.90% | 0.1   | G3DSA:1.10.510.10 (GENE3D); IPR001245 (PFAM); PTHR24416 (PANTHER); PTHR24416:SF309 (PANTHER); IPR008266 (PROSITE_PATTERNS); IPR000719 (PROSITE_PROFILES); IPR011009 (SUPERFAMILY)                                                          |
| 2322 | 67235_length_144_cvg_6.2_tip_1_4  | 0  | ---NA---                                                   | 48 |          |        | 0.113 | IPR002223 (PFAM); IPR002223 (G3DSA:4.10.410.GENE3D); IPR002223 (SUPERFAMILY)                                                                                                                                                               |
| 2323 | 67577_length_144_cvg_2.0_tip_1_1  | 2  | epidermal growth factor receptor isoform x2                | 48 | 1.17E-16 | 89.00% | 0.097 | IPR000494 (G3DSA:3.80.20.GENE3D); SSF52058 (SUPERFAMILY)                                                                                                                                                                                   |
| 2324 | 68047_length_144_cvg_2.3_tip_1_5  | 0  | ubiquitin carboxyl-terminal hydrolase                      | 48 | 4.84E-11 | 69.38% | 0.103 | no IPS match                                                                                                                                                                                                                               |
| 2326 | 69411_length_145_cvg_2.0_tip_1_1  | 2  | partial                                                    | 48 | 1.47E-23 | 99.40% | 0.106 | IPR011614 (G3DSA:2.40.180.GENE3D); IPR011614 (PFAM); IPR018028 (PANTHER); IPR020835 (SUPERFAMILY)                                                                                                                                          |
| 2325 | 68553_length_145_cvg_2.0_tip_1_3  | 1  | zinc finger and scan domain-containing protein 2-like      | 49 | 2.24E-17 | 84.40% | 0.147 | IPR013087 (G3DSA:3.30.160.GENE3D); PF13465 (PFAM); PTHR24409 (PANTHER); IPR007087 (PROSITE_PATTERNS); IPR007087 (PROSITE_PROFILES); SSF57667 (SUPERFAMILY)                                                                                 |
| 2327 | 69591_length_145_cvg_2.0_tip_1_3  | 2  | cre-bli-4 protein                                          | 49 | 6.85E-10 | 75.60% | 0.101 | IPR000209 (G3DSA:3.40.50.GENE3D); IPR000209 (SUPERFAMILY)                                                                                                                                                                                  |
| 2328 | 70853_length_145_cvg_2.0_tip_1_3  | 2  | fibrillin-2-like                                           | 49 | 7.15E-19 | 91.20% | 0.116 | G3DSA:2.10.25.10 (GENE3D); IPR001881 (PFAM); PTHR24039:SF20 (PANTHER); IPR011398 (PANTHER); IPR000152 (PROSITE_PATTERNS); SSF57196 (SUPERFAMILY)                                                                                           |
| 2329 | 71019_length_145_cvg_2.0_tip_1_0  | 1  | moxd1 homolog 1-like                                       | 49 | 7.03E-08 | 67.70% | 0.146 | IPR000323 (G3DSA:2.60.120.GENE3D); IPR000323 (PFAM); IPR008977 (SUPERFAMILY)                                                                                                                                                               |
| 2330 | 73573_length_146_cvg_2.0_tip_1_3  | 1  | polypeptide n-acetylgalactosaminyltransferase 5 isoform x1 | 49 | 1.34E-22 | 93.90% | 0.126 | PTHR11675:SF21 (PANTHER); PTHR11675 (PANTHER); IPR029044 (SUPERFAMILY)                                                                                                                                                                     |
| 2331 | 73881_length_146_cvg_62.1_tip_1_3 | 21 | leucine-rich repeat-containing protein 45- partial         | 49 | 2.14E-06 | 70.00% | 0.248 | CYTOPLASMIC_DOMAIN (PHOBIUS); TRANSMEMBRANE (PHOBIUS); NON_CYTOPLASMIC_DOMAIN (PHOBIUS); TMhelix (TMHMM)                                                                                                                                   |
| 2332 | 74393_length_146_cvg_2.0_tip_1_0  | 2  | ---NA---                                                   | 49 |          |        | 0.106 | IPR018155 (PFAM); IPR013785 (G3DSA:3.20.20.GENE3D); IPR017853 (SUPERFAMILY)                                                                                                                                                                |
| 2333 | 74545_length_146_cvg_3.0_tip_1_0  | 1  | furin-like protease isoforms 1 1-x 2-like                  | 49 | 1.12E-18 | 88.80% | 0.113 | IPR000209 (G3DSA:3.40.50.GENE3D); IPR015500 (PANTHER); PTHR10795:SF71 (PANTHER); IPR000209 (SUPERFAMILY)                                                                                                                                   |
| 2334 | 74645_length_146_cvg_2.0_tip_1_0  | 2  | 14/03/2003                                                 | 49 | 1.06E-13 | 88.70% | 0.102 | G3DSA:1.20.190.20 (GENE3D); IPR023410 (PFAM); IPR000308 (PANTHER); IPR023410 (SUPERFAMILY)                                                                                                                                                 |
| 2335 | 75617_length_147_cvg_3.0_tip_1_5  | 1  | protein 5nuc-like                                          | 49 | 2.64E-15 | 82.20% | 0.096 | IPR029052 (G3DSA:3.60.21.GENE3D); PTHR11575:SF21 (PANTHER); IPR006179 (PANTHER); IPR029052 (SUPERFAMILY)                                                                                                                                   |
| 2336 | 75849_length_147_cvg_3.0_tip_1_0  | 0  | dopamine beta hydroxylase                                  | 49 | 4.12E-09 | 66.20% | 0.101 | IPR005018 (PFAM); IPR000945 (PANTHER); PTHR10157:SF23 (PANTHER); IPR005018 (PROSITE_PROFILES)                                                                                                                                              |
| 2337 | 76097_length_147_cvg_2.0_tip_1_3  | 1  | serine threonine-protein kinase tao1 isoform x1            | 49 | 1.54E-24 | 95.50% | 0.112 | IPR000719 (PFAM); G3DSA:1.10.510.10 (GENE3D); PTHR24361:SF259 (PANTHER); PTHR24361 (PANTHER); IPR000719 (PROSITE_PROFILES); IPR011009 (SUPERFAMILY)                                                                                        |
| 2338 | 77657_length_147_cvg_3.0_tip_1_5  | 3  | endothelial lipase                                         | 49 | 5.92E-11 | 75.00% | 0.206 | IPR013818 (PFAM); IPR029058 (G3DSA:3.40.50.GENE3D); IPR000734 (PANTHER); IPR029058 (SUPERFAMILY)                                                                                                                                           |
| 2341 | 80069_length_148_cvg_5.0_tip_1_5  | 0  | collagen type iv                                           | 49 | 6.43E-20 | 87.20% | 0.137 | IPR001442 (SMART); IPR001442 (G3DSA:2.170.240.GENE3D); IPR001442 (PFAM); PTHR24023:SF397 (PANTHER); PTHR24023 (PANTHER); IPR001442 (PROSITE_PROFILES); IPR016187 (SUPERFAMILY)                                                             |
| 2342 | 80565_length_148_cvg_2.0_tip_1_5  | 0  | vitellogenin partial                                       | 49 | 1.28E-14 | 85.40% | 0.098 | no IPS match                                                                                                                                                                                                                               |
| 2344 | 81249_length_148_cvg_2.0_tip_1_2  | 2  | bone morphogenetic protein 10                              | 49 | 2.59E-20 | 82.80% | 0.149 | IPR001839 (SMART); IPR029034 (G3DSA:2.10.90.GENE3D); IPR001839 (PFAM); IPR015615 (PANTHER); PTHR11848:SF146 (PANTHER); IPR017948 (PROSITE_PATTERNS); IPR001839 (PROSITE_PROFILES); IPR029034 (SUPERFAMILY)                                 |
| 2345 | 82099_length_149_cvg_2.0_tip_1_2  | 2  | epidermal growth factor receptor                           | 49 | 2.85E-11 | 74.60% | 0.126 | IPR006212 (SMART); G3DSA:2.10.220.10 (GENE3D); PF14843 (PFAM); IPR009030 (SUPERFAMILY)                                                                                                                                                     |
| 2346 | 82301_length_149_cvg_2.0_tip_1_5  | 1  | lysosomal pro-x                                            | 49 | 2.71E-16 | 81.50% | 0.101 | IPR008758 (PFAM); PTHR11010:SF31 (PANTHER); IPR008758 (PANTHER)                                                                                                                                                                            |
| 2348 | 82517_length_149_cvg_4.0_tip_1_5  | 1  | isoform a                                                  | 49 | 2.85E-19 | 84.40% | 0.11  | IPR001223 (PFAM); IPR013781 (G3DSA:3.20.20.GENE3D); PTHR11177:SF144 (PANTHER); PTHR11177 (PANTHER); IPR001579 (PROSITE_PATTERNS); IPR017853 (SUPERFAMILY)                                                                                  |
| 2349 | 82575_length_149_cvg_2.0_tip_1_2  | 1  | carboxypeptidase s                                         | 49 | 6.53E-13 | 83.00% | 0.104 | G3DSA:3.40.630.10 (GENE3D); PTHR11014 (PANTHER); PTHR11014:SF66 (PANTHER); SSF53187 (SUPERFAMILY)                                                                                                                                          |
| 2339 | 78887_length_148_cvg_3.0_tip_1_3  | 0  | lysosomal pro-x carboxypeptidase                           | 50 | 5.75E-17 | 84.00% | 0.098 | IPR008758 (PFAM); PTHR11010:SF11 (PANTHER); IPR008758 (PANTHER)                                                                                                                                                                            |
| 2340 | 79833_length_148_cvg_2.0_tip_1_0  | 2  | ---NA---                                                   | 50 |          |        | 0.101 | IPR001304 (PFAM); IPR016186 (G3DSA:3.10.100.GENE3D); IPR001304 (PROSITE_PROFILES); IPR016187 (SUPERFAMILY)                                                                                                                                 |
| 2343 | 81157_length_148_cvg_2.0_tip_1_3  | 2  | ---NA---                                                   | 50 |          |        | 0.096 | no IPS match                                                                                                                                                                                                                               |



|      |                                    |     |                                                                                                                                                 |    |          |        |       |                                                                                                                                                                                                                                                       |
|------|------------------------------------|-----|-------------------------------------------------------------------------------------------------------------------------------------------------|----|----------|--------|-------|-------------------------------------------------------------------------------------------------------------------------------------------------------------------------------------------------------------------------------------------------------|
| 2347 | 82389_length_149_cvg_2.0_tip_1_1   | 3   | isoform b                                                                                                                                       | 50 | 5.36E-21 | 92.20% | 0.097 | G3DSA:3.30.200.20 (GENE3D); IPR001245 (PFAM); PTHR24418 (PANTHER); PTHR24418:SF0 (PANTHER); IPR000719 (PROSITE_PROFILES); IPR011009 (SUPERFAMILY)                                                                                                     |
| 2350 | 82673_length_149_cvg_6.0_tip_1_4   | 0   | ---NA---                                                                                                                                        | 50 |          |        | 0.103 | PF14704 (PFAM)                                                                                                                                                                                                                                        |
| 2351 | 83441_length_149_cvg_2.0_tip_1_4   | 3   | peptidyl-prolyl cis-trans isomerase a- partial                                                                                                  | 50 | 7.60E-20 | 87.20% | 0.145 | IPR002130 (PRINTS); IPR029000 (G3DSA:2.40.100.GENE3D); IPR002130 (PFAM); IPR024936 (PANTHER); IPR002130 (PROSITE_PROFILES); IPR029000 (SUPERFAMILY)                                                                                                   |
| 2352 | 83571_length_149_cvg_2.0_tip_1_0   | 2   | zinc finger protein                                                                                                                             | 50 | 2.22E-19 | 85.20% | 0.096 | IPR013087 (G3DSA:3.30.160.GENE3D); IPR013087 (G3DSA:3.30.160.GENE3D); PF13465 (PFAM); PTHR23228 (PANTHER); PTHR23228:SF14 (PANTHER); IPR007087 (PROSITE_PATTERNS); IPR007087 (PROSITE_PROFILES); IPR007087 (PROSITE_PROFILES); SSF57667 (SUPERFAMILY) |
| 2353 | 83839_length_149_cvg_2.0_tip_1_1   | 3   | serine protease nudel                                                                                                                           | 50 | 2.42E-21 | 82.10% | 0.12  | IPR002172 (G3DSA:4.10.400.GENE3D); IPR002172 (SUPERFAMILY)                                                                                                                                                                                            |
| 2354 | 87869_length_150_cvg_2.0_tip_1_4   | 2   | laminin subunit alpha                                                                                                                           | 50 | 1.55E-16 | 77.20% | 0.117 | G3DSA:2.10.25.10 (GENE3D); IPR002049 (PFAM); PTHR10574 (PANTHER); PTHR10574:SF39 (PANTHER)                                                                                                                                                            |
| 2355 | 87911_length_150_cvg_3.0_tip_1_4   | 2   | chondroitin sulfate synthase 1-like                                                                                                             | 50 | 1.34E-20 | 91.80% | 0.1   | IPR008428 (PFAM); PTHR12369 (PANTHER); PTHR12369:SF11 (PANTHER)                                                                                                                                                                                       |
| 2356 | 88159_length_150_cvg_3.0_tip_1_4   | 1   | aael007486- partial                                                                                                                             | 50 | 2.38E-17 | 85.50% | 0.117 | IPR029058 (G3DSA:3.40.50.GENE3D); IPR002018 (PFAM); PTHR11559 (PANTHER); IPR019826 (PROSITE_PATTERNS); IPR029058 (SUPERFAMILY)                                                                                                                        |
| 2357 | 88747_length_150_cvg_3.0_tip_1_0   | 2   | calcium-activated chloride channel regulator 4-like                                                                                             | 50 | 7.39E-09 | 64.80% | 0.121 | IPR013642 (PFAM)                                                                                                                                                                                                                                      |
| 2358 | 88941_length_150_cvg_2.0_tip_1_3   | 2   | von willebrand factor type egf and pentraxin domain-containing protein 1                                                                        | 50 | 4.72E-13 | 80.00% | 0.107 | IPR001881 (SMART); IPR000742 (SMART); IPR000742 (PFAM); G3DSA:2.10.25.10 (GENE3D); PTHR24049:SF6 (PANTHER); PTHR24049 (PANTHER); IPR013032 (PROSITE_PATTERNS); IPR013032 (PROSITE_PATTERNS); IPR000742 (PROSITE_PROFILES); SSF57196 (SUPERFAMILY)     |
| 2359 | 89473_length_150_cvg_4.0_tip_1_1   | 3   | basement membrane-specific heparan sulfate proteoglycan core protein                                                                            | 50 | 5.77E-12 | 75.70% | 0.105 | no IPS match                                                                                                                                                                                                                                          |
| 2360 | 89787_length_150_cvg_2.0_tip_1_4   | 1   | dopamine beta-hydroxylase                                                                                                                       | 50 | 1.79E-06 | 67.40% | 0.112 | IPR000945 (PANTHER)                                                                                                                                                                                                                                   |
| 2361 | 90033_length_150_cvg_4.0_tip_1_4   | 2   | glyceraldehyde-3-phosphate partial                                                                                                              | 50 | 2.57E-20 | 91.20% | 0.104 | IPR020831 (PRINTS); IPR020829 (PFAM); IPR016040 (G3DSA:3.40.50.GENE3D); IPR020831 (PANTHER); IPR020830 (PROSITE_PATTERNS); SSF55347 (SUPERFAMILY)                                                                                                     |
| 2362 | 90143_length_150_cvg_2.0_tip_1_3   | 1   | fibrillin-2-like                                                                                                                                | 50 | 3.08E-17 | 83.10% | 0.122 | G3DSA:2.10.25.10 (GENE3D); IPR001881 (PFAM); PTHR24039:SF20 (PANTHER); IPR011398 (PANTHER); SSF57196 (SUPERFAMILY)                                                                                                                                    |
| 2363 | 92997_length_150_cvg_2.0_tip_1_3   | 1   | sialate o-acetyltransferase isoform x1                                                                                                          | 50 | 4.23E-10 | 78.90% | 0.177 | IPR005181 (PFAM)                                                                                                                                                                                                                                      |
| 2364 | 93721_length_150_cvg_2.0_tip_1_0   | 3   | sushi von willebrand factor type a egf pentraxin domain-containing partial                                                                      | 50 | 9.78E-08 | 60.60% | 0.111 | IPR000436 (PFAM); G3DSA:2.10.70.10 (GENE3D); G3DSA:2.10.70.10 (GENE3D); IPR000436 (PROSITE_PROFILES); IPR000436 (PROSITE_PROFILES); IPR000436 (SUPERFAMILY)                                                                                           |
| 2365 | 93927_length_150_cvg_4.0_tip_1_4   | 4   | heat shock protein 70                                                                                                                           | 50 | 1.58E-16 | 84.80% | 0.103 | IPR013126 (PFAM); IPR029047 (G3DSA:2.60.34.GENE3D); PTHR19375:SF156 (PANTHER); PTHR19375 (PANTHER); IPR029047 (SUPERFAMILY)                                                                                                                           |
| 2366 | 94339_length_151_cvg_3.0_tip_1_5   | 5   | xanthine dehydrogenase partial                                                                                                                  | 50 | 2.62E-24 | 94.40% | 0.098 | IPR002888 (PFAM); IPR002888 (G3DSA:1.10.150.GENE3D); PTHR11908:SF32 (PANTHER); PTHR11908 (PANTHER); IPR002888 (SUPERFAMILY)                                                                                                                           |
| 2367 | 95511_length_151_cvg_2.0_tip_1_2   | 4   | syntaxin 1a                                                                                                                                     | 50 | 9.32E-19 | 83.10% | 0.102 | Coil (COILS); G3DSA:1.20.58.70 (GENE3D); IPR006011 (PFAM); IPR010989 (SUPERFAMILY)                                                                                                                                                                    |
| 2368 | 95759_length_152_cvg_2.0_tip_1_0   | 2   | secreted protein with kunitz                                                                                                                    | 51 | 2.22E-18 | 76.50% | 0.114 | IPR002223 (PRINTS); IPR002223 (SMART); IPR002223 (PFAM); IPR002223 (G3DSA:4.10.410.GENE3D); PTHR10083 (PANTHER); IPR020901 (PROSITE_PATTERNS); IPR002223 (PROSITE_PROFILES); IPR002223 (SUPERFAMILY)                                                  |
| 2369 | 95975_length_152_cvg_102.6_tip_1_0 | 308 | trypsin-like serine proteinase 1                                                                                                                | 51 | 1.20E-09 | 64.50% | 0.32  | G3DSA:2.40.10.10 (GENE3D); SIGNAL_PEPTIDE_C_REGION (PHOBIUS); SIGNAL_PEPTIDE_H_REGION (PHOBIUS); SIGNAL_PEPTIDE_N_REGION (PHOBIUS); NON_CYTOPLASMIC_DOMAIN (PHOBIUS); IPR009003 (SUPERFAMILY)                                                         |
| 2370 | 96301_length_152_cvg_5.2_tip_1_3   | 0   | heat shock protein partial                                                                                                                      | 51 | 7.87E-23 | 95.30% | 0.11  | G3DSA:3.30.420.40 (GENE3D); IPR013126 (PFAM); G3DSA:3.90.640.10 (GENE3D); PTHR19375:SF137 (PANTHER); PTHR19375 (PANTHER); SSF53067 (SUPERFAMILY)                                                                                                      |
| 2371 | 97170_length_153_cvg_3.0_tip_1_3   | 4   | kielin chordin-like protein                                                                                                                     | 51 | 9.36E-17 | 78.70% | 0.14  | IPR014853 (SMART); IPR014853 (PFAM); PTHR11339 (PANTHER)                                                                                                                                                                                              |
| 2372 | 98334_length_154_cvg_2.0_tip_1_2   | 2   | receptor-type tyrosine-protein phosphatase mu                                                                                                   | 51 | 1.80E-10 | 73.10% | 0.105 | IPR000242 (PFAM); IPR029021 (G3DSA:3.90.190.GENE3D); PTHR19134 (PANTHER); IPR000242 (PROSITE_PROFILES); IPR029021 (SUPERFAMILY)                                                                                                                       |
| 2    | 102236_length_158_cvg_3.0_tip_1_2  | 3   | protein cbg25156                                                                                                                                | 52 | 5.14E-06 | 54.00% | 0.102 | IPR002172 (PFAM); IPR002172 (G3DSA:4.10.400.GENE3D); IPR002172 (PROSITE_PROFILES); IPR002172 (SUPERFAMILY)                                                                                                                                            |
| 2373 | 98804_length_155_cvg_2.0_tip_1_1   | 2   | deoxyribonuclease-1-like 2-like                                                                                                                 | 52 | 2.24E-10 | 81.10% | 0.099 | IPR005135 (G3DSA:3.60.10.GENE3D); IPR016202 (PANTHER); IPR005135 (SUPERFAMILY)                                                                                                                                                                        |
| 2374 | 99236_length_155_cvg_36.2_tip_0_0  | 28  | egcse_cyano ame: full=endoglycoceramidase short=egc case ame: full=glycosphingolipid-specific enzyme short=gsl-specific enzyme flags: precursor | 52 | 1.16E-11 | 80.33% | 0.102 | IPR013781 (G3DSA:3.20.20.GENE3D); IPR017853 (SUPERFAMILY)                                                                                                                                                                                             |

|      |                                    |     |                                                                                                                                                     |    |          |         |       |                                                                                                                                                                                                         |
|------|------------------------------------|-----|-----------------------------------------------------------------------------------------------------------------------------------------------------|----|----------|---------|-------|---------------------------------------------------------------------------------------------------------------------------------------------------------------------------------------------------------|
| 2375 | 99238_length_155_cvg_63.0_tip_0_0  | 95  | egcse_cyano ame: full=endoglycoceramidase<br>short=egcase ame: full=glycosphingolipid-specific<br>enzyme short=gsl-specific enzyme flags: precursor | 52 | 1.16E-11 | 80.33%  | 0.102 | IPR013781 (G3DSA:3.20.20.GENE3D); IPR017853 (SUPERFAMILY)                                                                                                                                               |
| 2376 | 99640_length_155_cvg_2.0_tip_1_1   | 2   | Af1-cadherin                                                                                                                                        | 52 | 1.81E-06 | 67.50%  | 0.106 | no IPS match                                                                                                                                                                                            |
| 1    | 102208_length_158_cvg_2.0_tip_1_4  | 2   | ---NA---                                                                                                                                            | 53 |          |         | 0.104 | IPR008160 (PFAM)                                                                                                                                                                                        |
| 3    | 103152_length_159_cvg_2.0_tip_1_4  | 0   | variable lymphocyte receptor a                                                                                                                      | 53 | 1.94E-06 | 69.00%  | 0.128 | PR00019 (PRINTS); IPR003591 (SMART); G3DSA:3.80.10.10 (GENE3D); IPR001611 (PFAM); IPR001611 (PROSITE_PROFILES); IPR001611 (PROSITE_PROFILES); SSF52058 (SUPERFAMILY)                                    |
| 4    | 103416_length_160_cvg_4.0_tip_1_1  | 4   | proclotting enzyme                                                                                                                                  | 53 | 7.72E-10 | 65.40%  | 0.136 | IPR001254 (PFAM); G3DSA:2.40.10.10 (GENE3D); PTHR24260:SF3 (PANTHER); PTHR24260 (PANTHER); IPR018114 (PROSITE_PATTERNS); IPR009003 (SUPERFAMILY)                                                        |
| 6    | 104090_length_160_cvg_3.0_tip_1_4  | 4   | secretory phospholipase a2 receptor                                                                                                                 | 53 | 1.82E-06 | 65.33%  | 0.1   | IPR001304 (PFAM); IPR016186 (G3DSA:3.10.100.GENE3D); IPR001304 (PROSITE_PROFILES); IPR016187 (SUPERFAMILY)                                                                                              |
| 5    | 103454_length_160_cvg_63.0_tip_1_0 | 573 | serine protease inhibitor dipetalogastin-like                                                                                                       | 54 | 3.24E-06 | 72.00%  | 0.099 | IPR002350 (PFAM); G3DSA:3.30.60.30 (GENE3D); IPR002350 (PROSITE_PROFILES); SSF100895 (SUPERFAMILY)                                                                                                      |
| 7    | 104256_length_161_cvg_2.0_tip_1_3  | 0   | transforming growth factor-beta-induced protein ig-h3                                                                                               | 54 | 5.16E-20 | 72.70%  | 0.103 | IPR000782 (G3DSA:2.30.180.GENE3D); IPR000782 (PFAM); PTHR10900 (PANTHER); PTHR10900:SF73 (PANTHER); IPR000782 (PROSITE_PROFILES); IPR000782 (SUPERFAMILY)                                               |
| 8    | 104358_length_161_cvg_62.0_tip_0_0 | 15  | colostrum trypsin inhibitor-like                                                                                                                    | 54 | 2.06E-13 | 74.70%  | 0.101 | IPR002223 (PRINTS); IPR002223 (SMART); IPR002223 (PFAM); IPR002223 (G3DSA:4.10.410.GENE3D); PTHR10083 (PANTHER); IPR020901 (PROSITE_PATTERNS); IPR002223 (PROSITE_PROFILES); IPR002223 (SUPERFAMILY)    |
| 9    | 104644_length_161_cvg_63.0_tip_0_3 | 248 | glyceraldehyde-3-phosphate dehydrogenase                                                                                                            | 54 | 2.54E-13 | 89.70%  | 0.123 | PTHR10836:SF31 (PANTHER); IPR020831 (PANTHER)                                                                                                                                                           |
| 10   | 104710_length_161_cvg_3.7_tip_1_3  | 2   | xylosyltransferase 1-like                                                                                                                           | 54 | 4.86E-12 | 63.60%  | 0.102 | no IPS match                                                                                                                                                                                            |
| 11   | 104890_length_161_cvg_2.0_tip_1_0  | 2   | leucomyosuppressin precursor                                                                                                                        | 54 | 8.56E-23 | 81.50%  | 0.247 | NON_CYTOPLASMIC_DOMAIN (PHOBIUS); SIGNAL_PEPTIDE_H_REGION (PHOBIUS); SIGNAL_PEPTIDE_C_REGION (PHOBIUS); SIGNAL_PEPTIDE (PHOBIUS); SIGNAL_PEPTIDE_N_REGION (PHOBIUS)                                     |
| 12   | 105574_length_162_cvg_2.0_tip_1_5  | 1   | epidermal growth factor receptor isoform x1                                                                                                         | 54 | 6.73E-29 | 100.00% | 0.131 | G3DSA:1.10.510.10 (GENE3D); IPR001245 (PFAM); PTHR24416 (PANTHER); PTHR24416:SF95 (PANTHER); IPR000719 (PROSITE_PROFILES); IPR011009 (SUPERFAMILY)                                                      |
| 13   | 105650_length_162_cvg_63.0_tip_0_4 | 24  | fibroleukin-like isoform x1                                                                                                                         | 54 | 5.25E-07 | 68.00%  | 0.106 | IPR002181 (PFAM); IPR014716 (G3DSA:3.90.215.GENE3D); IPR002181 (PROSITE_PROFILES); IPR002181 (SUPERFAMILY)                                                                                              |
| 14   | 105984_length_163_cvg_4.0_tip_1_1  | 4   | hyaluronidase- partial                                                                                                                              | 54 | 9.85E-09 | 70.90%  | 0.102 | IPR013785 (G3DSA:3.20.20.GENE3D); IPR018155 (PFAM); IPR018155 (PANTHER); PTHR11769:SF8 (PANTHER); IPR017853 (SUPERFAMILY)                                                                               |
| 15   | 106044_length_163_cvg_3.0_tip_1_5  | 3   | ---NA---                                                                                                                                            | 54 |          |         | 0.104 | IPR013642 (PFAM)                                                                                                                                                                                        |
| 16   | 106196_length_163_cvg_2.0_tip_1_4  | 1   | down syndrome cell adhesion                                                                                                                         | 54 | 5.55E-22 | 90.00%  | 0.114 | IPR013783 (G3DSA:2.60.40.GENE3D); IPR013783 (G3DSA:2.60.40.GENE3D); PTHR10489 (PANTHER); PTHR10489:SF567 (PANTHER); IPR003961 (PROSITE_PROFILES); IPR003961 (PROSITE_PROFILES); IPR003961 (SUPERFAMILY) |
| 17   | 106244_length_163_cvg_2.0_tip_1_2  | 1   | peptidyl-alpha-hydroxyglycine alpha-amidating lyase 1                                                                                               | 54 | 2.03E-10 | 70.30%  | 0.107 | IPR001258 (PFAM)                                                                                                                                                                                        |
| 18   | 106402_length_163_cvg_3.4_tip_1_4  | 1   | peptidyl-prolyl cis-trans isomerase nima-interacting 1-like                                                                                         | 54 | 6.32E-23 | 82.80%  | 0.11  | G3DSA:3.10.50.40 (GENE3D); PTHR10657 (PANTHER); SSF54534 (SUPERFAMILY)                                                                                                                                  |
| 20   | 106972_length_164_cvg_2.0_tip_1_2  | 2   | attractin-like protein 1                                                                                                                            | 54 | 7.18E-23 | 94.80%  | 0.193 | PTHR10574:SF3 (PANTHER); PTHR10574 (PANTHER); NON_CYTOPLASMIC_DOMAIN (PHOBIUS); CYTOPLASMIC_DOMAIN (PHOBIUS); TRANSMEMBRANE (PHOBIUS); TMhelix (TMHMM)                                                  |
| 19   | 106958_length_164_cvg_2.0_tip_1_4  | 1   | cub and sushi domain-containing protein 1                                                                                                           | 55 | 1.52E-07 | 53.80%  | 0.1   | IPR000436 (SMART); G3DSA:2.10.70.10 (GENE3D); IPR000436 (PFAM); IPR000436 (PROSITE_PROFILES); IPR000436 (SUPERFAMILY)                                                                                   |
| 21   | 106986_length_164_cvg_9.0_tip_1_1  | 4   | adenosine deaminase cecr1-like                                                                                                                      | 55 | 3.33E-19 | 84.10%  | 0.108 | IPR001365 (PFAM); G3DSA:3.20.20.140 (GENE3D); PTHR11409 (PANTHER); PTHR11409:SF39 (PANTHER); SSF51556 (SUPERFAMILY)                                                                                     |
| 22   | 108732_length_166_cvg_28.2_tip_0_5 | 4   | techlectin- partial                                                                                                                                 | 55 | 9.16E-12 | 72.90%  | 0.127 | IPR002181 (PFAM); IPR014716 (G3DSA:3.90.215.GENE3D); PTHR19143 (PANTHER); IPR002181 (PROSITE_PROFILES); IPR002181 (SUPERFAMILY)                                                                         |
| 23   | 108752_length_166_cvg_62.0_tip_0_4 | 13  | hemagglutinin amebocyte aggregation factor-like                                                                                                     | 55 | 9.40E-10 | 66.50%  | 0.102 | PF14704 (PFAM); IPR026645 (PANTHER)                                                                                                                                                                     |
| 24   | 108754_length_166_cvg_63.0_tip_0_4 | 44  | hemagglutinin amebocyte aggregation factor-like                                                                                                     | 55 | 1.79E-08 | 63.40%  | 0.099 | PF14704 (PFAM); PTHR15040:SF3 (PANTHER); IPR026645 (PANTHER)                                                                                                                                            |
| 25   | 109168_length_167_cvg_63.0_tip_0_0 | 31  | ---NA---                                                                                                                                            | 56 |          |         | 0.152 | no IPS match                                                                                                                                                                                            |
| 26   | 109720_length_168_cvg_2.0_tip_1_2  | 1   | laminin a                                                                                                                                           | 56 | 1.32E-17 | 75.70%  | 0.1   | G3DSA:2.10.25.10 (GENE3D); IPR002049 (PFAM); IPR013032 (PROSITE_PATTERNS); IPR002049 (PROSITE_PATTERNS); IPR002049 (PROSITE_PROFILES); SSF57196 (SUPERFAMILY)                                           |
| 27   | 110249_length_168_cvg_4.0_tip_1_2  | 6   | er degradation-enhancing alpha-mannosidase-like protein 2                                                                                           | 56 | 7.56E-27 | 92.20%  | 0.202 | IPR001382 (G3DSA:1.50.10.GENE3D); IPR001382 (PFAM); IPR001382 (PANTHER); PTHR11742:SF37 (PANTHER); IPR001382 (SUPERFAMILY)                                                                              |
| 28   | 110419_length_168_cvg_2.0_tip_1_3  | 0   | carboxypeptidase a2-like                                                                                                                            | 56 | 1.43E-14 | 73.80%  | 0.13  | G3DSA:3.40.630.10 (GENE3D); IPR000834 (PFAM); PTHR11705 (PANTHER); SSF53187 (SUPERFAMILY)                                                                                                               |
| 29   | 110659_length_169_cvg_29.0_tip_1_4 | 1   | hemagglutinin amebocyte aggregation factor-like                                                                                                     | 56 | 1.73E-10 | 70.90%  | 0.105 | PF14704 (PFAM); IPR026645 (PANTHER)                                                                                                                                                                     |

|    |                                     |     |                                                                                               |    |          |        |         |                                                                                                                                                                                                                                                                                                                              |
|----|-------------------------------------|-----|-----------------------------------------------------------------------------------------------|----|----------|--------|---------|------------------------------------------------------------------------------------------------------------------------------------------------------------------------------------------------------------------------------------------------------------------------------------------------------------------------------|
| 30 | 110727_length_169_cvg_2.2_tip_1_2   | 4   | ankyrin domain-containing protein                                                             | 56 | 5.83E-09 | 68.50% | 0.138   | IPR002110 (SMART); IPR020683 (G3DSA:1.25.40.GENE3D); PF13857 (PFAM); PTHR24193 (PANTHER); IPR002110 (PROSITE_PROFILES); IPR020683 (PROSITE_PROFILES); IPR020683 (SUPERFAMILY)                                                                                                                                                |
| 32 | 111137_length_169_cvg_2.0_tip_1_5   | 3   | imaginal disc growth factor                                                                   | 56 | 1.95E-23 | 86.80% | 0.134   | IPR013781 (G3DSA:3.20.20.GENE3D); IPR001223 (PFAM); IPR017853 (SUPERFAMILY)                                                                                                                                                                                                                                                  |
| 31 | 110923_length_169_cvg_122.7_tip_0_3 | 596 | anti-lipopolysaccharide factor isoform 7                                                      | 57 | 4.20E-15 | 73.60% | 0.118   | IPR024509 (PFAM); IPR024716 (PRODOM)                                                                                                                                                                                                                                                                                         |
| 33 | 111991_length_171_cvg_2.0_tip_1_3   | 1   | neurogenic locus protein partial                                                              | 57 | 6.03E-16 | 70.50% | 0.11    | IPR000742 (SMART); IPR001881 (SMART); G3DSA:2.10.25.10 (GENE3D); G3DSA:2.10.25.10 (GENE3D); IPR000742 (PFAM); PTHR24033:SF0 (PANTHER); PTHR24033 (PANTHER); IPR013032 (PROSITE_PATTERNS); IPR013032 (PROSITE_PATTERNS); IPR000742 (PROSITE_PROFILES); IPR000742 (PROSITE_PROFILES); SSF57196 (SUPERFAMILY)                   |
| 34 | 112135_length_171_cvg_63.0_tip_1_5  | 88  | ---NA---                                                                                      | 57 |          |        | 0.097   | G3DSA:3.30.60.30 (GENE3D); IPR002350 (PFAM); IPR002350 (PROSITE_PROFILES); SSF100895 (SUPERFAMILY)                                                                                                                                                                                                                           |
| 35 | 112379_length_171_cvg_2.0_tip_1_2   | 2   | low quality protein: von willebrand factor type egf and pentraxin domain-containing protein 1 | 57 | 9.43E-18 | 79.20% | 0.112   | PR00010 (PRINTS); IPR001881 (SMART); IPR000742 (SMART); G3DSA:2.10.25.10 (GENE3D); IPR000742 (PFAM); G3DSA:2.10.25.10 (GENE3D); PTHR24049 (PANTHER); PTHR24049:SF6 (PANTHER); IPR013032 (PROSITE_PATTERNS); IPR013032 (PROSITE_PATTERNS); IPR000152 (PROSITE_PATTERNS); IPR000742 (PROSITE_PROFILES); SSF57196 (SUPERFAMILY) |
| 36 | 113019_length_172_cvg_2.0_tip_1_1   | 2   | tyrosine-protein kinase src64b isoform x1                                                     | 57 | 3.50E-21 | 86.20% | 0.11    | IPR001245 (PFAM); G3DSA:1.10.510.10 (GENE3D); PTHR24418 (PANTHER); IPR008266 (PROSITE_PATTERNS); IPR000719 (PROSITE_PROFILES); IPR011009 (SUPERFAMILY)                                                                                                                                                                       |
| 37 | 113913_length_174_cvg_63.0_tip_1_2  | 510 | partial                                                                                       | 58 | 1.37E-16 | 80.80% | 0.117   | G3DSA:2.40.10.10 (GENE3D); IPR001254 (PFAM); PTHR24264 (PANTHER); IPR009003 (SUPERFAMILY)                                                                                                                                                                                                                                    |
| 38 | 114249_length_174_cvg_63.0_tip_0_5  | 75  | hemagglutinin amebocyte aggregation factor-like                                               | 58 | 1.37E-10 | 66.80% | 0.119   | PF14704 (PFAM); IPR026645 (PANTHER)                                                                                                                                                                                                                                                                                          |
| 39 | 114309_length_174_cvg_4.0_tip_1_4   | 5   | proprotein convertase subtilisin kexin type 5                                                 | 58 | 2.66E-11 | 71.20% | 0.108   | G3DSA:3.30.70.850 (GENE3D)                                                                                                                                                                                                                                                                                                   |
| 40 | 114729_length_175_cvg_2.0_tip_1_4   | 2   | acid sphingomyelinase-like phosphodiesterase 3a                                               | 58 | 1.88E-07 | 57.67% | 0.794 Y | NON_CYTOPLASMIC_DOMAIN (PHOBIUS); SIGNAL_PEPTIDE_N_REGION (PHOBIUS); SIGNAL_PEPTIDE_H_REGION (PHOBIUS); SIGNAL_PEPTIDE (PHOBIUS); SIGNAL_PEPTIDE_C_REGION (PHOBIUS); SignalP-TM (SIGNALP_GRAM_POSITIVE); SignalP-noTM (SIGNALP_EUK); SignalP-noTM (SIGNALP_GRAM_NEGATIVE)                                                    |
| 41 | 115223_length_176_cvg_11.0_tip_1_5  | 9   | peptidase m4                                                                                  | 58 | 1.58E-09 | 69.50% | 0.099   | IPR023612 (PRINTS); IPR013856 (PFAM); IPR013856 (G3DSA:3.10.170.GENE3D); SSF55486 (SUPERFAMILY)                                                                                                                                                                                                                              |
| 42 | 115267_length_176_cvg_20.0_tip_1_2  | 15  | hemagglutinin amebocyte aggregation factor-like                                               | 58 | 3.77E-10 | 64.60% | 0.102   | PF14704 (PFAM); IPR026645 (PANTHER)                                                                                                                                                                                                                                                                                          |
| 43 | 115341_length_176_cvg_2.5_tip_1_0   | 2   | alcohol dehydrogenase                                                                         | 59 | 1.51E-13 | 69.80% | 0.127   | IPR023210 (G3DSA:3.20.20.GENE3D); PTHR11732:SF183 (PANTHER); IPR001395 (PANTHER); IPR018170 (PROSITE_PATTERNS); IPR023210 (SUPERFAMILY)                                                                                                                                                                                      |
| 44 | 115509_length_176_cvg_63.0_tip_0_0  | 265 | chitinase partial                                                                             | 59 | 1.26E-15 | 70.00% | 0.147   | IPR013781 (G3DSA:3.20.20.GENE3D); IPR001223 (PFAM); IPR029070 (G3DSA:3.10.50.GENE3D); PTHR11177 (PANTHER); PTHR11177:SF112 (PANTHER); IPR029070 (SUPERFAMILY)                                                                                                                                                                |
| 45 | 115511_length_176_cvg_63.0_tip_0_0  | 158 | chitinase partial                                                                             | 59 | 6.65E-16 | 69.00% | 0.146   | IPR001223 (PFAM); IPR013781 (G3DSA:3.20.20.GENE3D); IPR029070 (G3DSA:3.10.50.GENE3D); PTHR11177 (PANTHER); PTHR11177:SF112 (PANTHER); IPR029070 (SUPERFAMILY)                                                                                                                                                                |
| 46 | 115799_length_177_cvg_4.0_tip_1_4   | 4   | cysteine-rich with egf-like domain protein 2                                                  | 59 | 1.02E-12 | 79.60% | 0.101   | no IPS match                                                                                                                                                                                                                                                                                                                 |
| 47 | 116507_length_178_cvg_2.0_tip_1_5   | 1   | proprotein convertase subtilisin kexin type                                                   | 59 | 1.39E-17 | 77.00% | 0.11    | G3DSA:3.30.70.850 (GENE3D); PTHR10795:SF325 (PANTHER); IPR015500 (PANTHER); IPR009020 (SUPERFAMILY)                                                                                                                                                                                                                          |
| 48 | 116763_length_178_cvg_2.0_tip_1_1   | 1   | hexamerin 1                                                                                   | 59 | 1.23E-21 | 85.30% | 0.1     | IPR005203 (PFAM); IPR005203 (G3DSA:2.60.40.GENE3D); PTHR11511:SF5 (PANTHER); IPR013788 (PANTHER); IPR014756 (SUPERFAMILY)                                                                                                                                                                                                    |
| 49 | 117133_length_179_cvg_2.0_tip_1_3   | 2   | ---NA---                                                                                      | 60 |          |        | 0.1     | IPR018155 (PFAM); IPR013785 (G3DSA:3.20.20.GENE3D); IPR017853 (SUPERFAMILY)                                                                                                                                                                                                                                                  |
| 50 | 117839_length_180_cvg_4.0_tip_1_2   | 4   | glyceraldehyde-3-phosphate dehydrogenase                                                      | 60 | 1.59E-23 | 88.30% | 0.159   | G3DSA:3.30.360.10 (GENE3D); IPR020829 (PFAM); PTHR10836:SF31 (PANTHER); IPR020831 (PANTHER); SSF55347 (SUPERFAMILY)                                                                                                                                                                                                          |
| 51 | 117991_length_180_cvg_3.0_tip_1_4   | 1   | peripheral plasma membrane protein cask isoform x5                                            | 60 | 2.59E-32 | 96.00% | 0.113   | IPR011511 (PFAM); G3DSA:2.30.30.40 (GENE3D); PTHR23122 (PANTHER); PTHR23122:SF7 (PANTHER); IPR001452 (PROSITE_PROFILES); IPR001452 (SUPERFAMILY)                                                                                                                                                                             |
| 52 | 118069_length_180_cvg_12.1_tip_0_0  | 4   | angiopoietin-1 isoform x1                                                                     | 60 | 2.60E-12 | 68.60% | 0.108   | IPR002181 (PFAM); IPR014716 (G3DSA:3.90.215.GENE3D); PTHR19143 (PANTHER); IPR002181 (PROSITE_PROFILES); IPR002181 (SUPERFAMILY)                                                                                                                                                                                              |
| 53 | 118075_length_180_cvg_2.0_tip_1_5   | 2   | zinc c2h2 type                                                                                | 60 | 8.11E-09 | 68.60% | 0.099   | IPR015880 (SMART); PF13465 (PFAM); IPR013087 (G3DSA:3.30.160.GENE3D); PTHR24409 (PANTHER); PTHR24409:SF14 (PANTHER); IPR007087 (PROSITE_PATTERNS); IPR007087 (PROSITE_PROFILES); SSF57667 (SUPERFAMILY)                                                                                                                      |
| 54 | 118147_length_180_cvg_23.0_tip_0_0  | 4   | microfibril-associated glycoprotein 4-like                                                    | 60 | 4.71E-12 | 68.20% | 0.118   | IPR002181 (PFAM); IPR014716 (G3DSA:3.90.215.GENE3D); PTHR19143 (PANTHER); IPR002181 (PROSITE_PROFILES); IPR002181 (SUPERFAMILY)                                                                                                                                                                                              |
| 55 | 118417_length_181_cvg_32.8_tip_1_5  | 10  | glycosyl hydrolase family cellulase                                                           | 60 | 2.73E-13 | 68.50% | 0.098   | IPR001547 (PFAM); IPR013781 (G3DSA:3.20.20.GENE3D); PTHR31308 (PANTHER); IPR017853 (SUPERFAMILY)                                                                                                                                                                                                                             |

|    |                                    |    |                                                                             |    |          |         |       |                                                                                                                                                                                                                                                                                                |
|----|------------------------------------|----|-----------------------------------------------------------------------------|----|----------|---------|-------|------------------------------------------------------------------------------------------------------------------------------------------------------------------------------------------------------------------------------------------------------------------------------------------------|
| 56 | 118419_length_181_cvg_63.0_tip_1_5 | 61 | glycosyl hydrolase family cellulase                                         | 60 | 9.00E-14 | 68.00%  | 0.098 | IPR013781 (G3DSA:3.20.20.GENE3D); IPR001547 (PFAM); PTHR31308 (PANTHER); IPR017853 (SUPERFAMILY)                                                                                                                                                                                               |
| 58 | 119217_length_182_cvg_2.0_tip_1_5  | 3  | peptidyl-alpha-hydroxyglycine alpha-amidating lyase 2-like                  | 60 | 3.15E-12 | 68.60%  | 0.098 | PTHR10680 (PANTHER)                                                                                                                                                                                                                                                                            |
| 57 | 118701_length_181_cvg_3.0_tip_1_3  | 2  | endothelin-converting enzyme 1 isoform x2                                   | 61 | 3.91E-22 | 82.30%  | 0.311 | IPR018497 (PFAM); IPR024079 (G3DSA:3.40.390.GENE3D); PTHR11733:SF124 (PANTHER); IPR000718 (PANTHER); SSF55486 (SUPERFAMILY)                                                                                                                                                                    |
| 59 | 119432_length_183_cvg_2.0_tip_1_4  | 1  | probable serine carboxypeptidase cpvl                                       | 61 | 3.46E-21 | 85.00%  | 0.143 | IPR029058 (G3DSA:3.40.50.GENE3D); IPR001563 (PFAM); PTHR11802:SF30 (PANTHER); IPR001563 (PANTHER); IPR029058 (SUPERFAMILY)                                                                                                                                                                     |
| 60 | 119548_length_183_cvg_10.8_tip_1_2 | 59 | ---NA---                                                                    | 61 |          |         | 0.222 | TMhelix (TMHMM)                                                                                                                                                                                                                                                                                |
| 61 | 121708_length_187_cvg_2.0_tip_1_3  | 1  | membrane metallo-endopeptidase-like 1 isoform x2                            | 63 | 8.56E-21 | 85.80%  | 0.114 | IPR024079 (G3DSA:3.40.390.GENE3D); IPR018497 (PFAM); PTHR11733:SF111 (PANTHER); IPR000718 (PANTHER); SSF55486 (SUPERFAMILY)                                                                                                                                                                    |
| 62 | 122478_length_188_cvg_3.0_tip_1_1  | 2  | cade_drome ame: full=de-cadherin ame: full=protein shotgun flags: precursor | 63 | 4.02E-09 | 59.90%  | 0.111 | IPR013320 (G3DSA:2.60.120.GENE3D)                                                                                                                                                                                                                                                              |
| 63 | 122908_length_189_cvg_2.0_tip_1_1  | 1  | moxd1 homolog 2-like                                                        | 63 | 3.72E-09 | 64.70%  | 0.141 | PF03712 (PFAM); IPR014784 (G3DSA:2.60.120.GENE3D); IPR000945 (PANTHER); IPR014783 (PROSITE_PATTERNS); IPR008977 (SUPERFAMILY)                                                                                                                                                                  |
| 65 | 124034_length_191_cvg_2.0_tip_1_5  | 2  | insulin-like growth factor-binding protein complex acid labile chain        | 63 | 4.88E-16 | 82.80%  | 0.113 | IPR001611 (PFAM); G3DSA:3.80.10.10 (GENE3D); PTHR24365 (PANTHER); PTHR24365:SF83 (PANTHER); SSF52058 (SUPERFAMILY)                                                                                                                                                                             |
| 66 | 124064_length_191_cvg_12.5_tip_0_5 | 7  | ankyrin domain-containing protein                                           | 63 | 2.26E-10 | 67.10%  | 0.134 | IPR002110 (SMART); IPR020683 (G3DSA:1.25.40.GENE3D); IPR020683 (PFAM); PTHR24193 (PANTHER); IPR002110 (PROSITE_PROFILES); IPR020683 (PROSITE_PROFILES); IPR020683 (SUPERFAMILY)                                                                                                                |
| 64 | 123634_length_190_cvg_2.0_tip_1_3  | 3  | aldehyde oxidase                                                            | 64 | 1.41E-19 | 81.00%  | 0.11  | IPR008274 (PFAM); IPR008274 (G3DSA:3.30.365.GENE3D); PTHR11908:SF65 (PANTHER); PTHR11908 (PANTHER); IPR008274 (SUPERFAMILY)                                                                                                                                                                    |
| 67 | 124910_length_192_cvg_2.0_tip_1_4  | 1  | protein kinase related to protein kinase isoform e                          | 64 | 3.14E-39 | 100.00% | 0.098 | IPR000719 (PFAM); G3DSA:1.10.510.10 (GENE3D); PTHR24357:SF80 (PANTHER); PTHR24357 (PANTHER); IPR000719 (PROSITE_PROFILES); IPR011009 (SUPERFAMILY)                                                                                                                                             |
| 68 | 125060_length_193_cvg_3.0_tip_1_0  | 1  | zinc finger protein 235-like                                                | 65 | 1.07E-11 | 64.60%  | 0.098 | IPR015880 (SMART); IPR013087 (G3DSA:3.30.160.GENE3D); PF13894 (PFAM); IPR013087 (G3DSA:3.30.160.GENE3D); IPR007087 (PFAM); PTHR24409 (PANTHER); IPR007087 (PROSITE_PATTERNS); IPR007087 (PROSITE_PATTERNS); IPR007087 (PROSITE_PROFILES); IPR007087 (PROSITE_PROFILES); SSF57667 (SUPERFAMILY) |
| 69 | 125208_length_193_cvg_3.2_tip_1_3  | 6  | predicted protein                                                           | 65 | 3.20E-08 | 48.50%  | 0.115 | no IPS match                                                                                                                                                                                                                                                                                   |
| 70 | 126392_length_195_cvg_3.0_tip_1_3  | 2  | heat shock protein partial                                                  | 65 | 7.35E-37 | 99.80%  | 0.1   | G3DSA:3.90.640.10 (GENE3D); IPR013126 (PFAM); PTHR19375 (PANTHER); PTHR19375:SF142 (PANTHER); SSF53067 (SUPERFAMILY)                                                                                                                                                                           |
| 71 | 126710_length_195_cvg_2.0_tip_1_2  | 3  | latrophilin cirl isoform x1                                                 | 65 | 7.59E-21 | 78.00%  | 0.117 | IPR000922 (PFAM); PTHR12011 (PANTHER); PTHR12011:SF260 (PANTHER); IPR000922 (PROSITE_PROFILES)                                                                                                                                                                                                 |
| 72 | 127202_length_196_cvg_4.8_tip_1_4  | 2  | gly-xaa carboxypeptidase                                                    | 65 | 1.45E-13 | 72.90%  | 0.107 | IPR011650 (G3DSA:3.30.70.GENE3D); IPR011650 (PFAM); PTHR11014 (PANTHER); PTHR11014:SF66 (PANTHER)                                                                                                                                                                                              |
| 73 | 127602_length_197_cvg_2.0_tip_1_2  | 4  | low quality protein: zinc finger protein 233                                | 65 | 1.52E-15 | 68.10%  | 0.105 | IPR015880 (SMART); PF13465 (PFAM); IPR013087 (G3DSA:3.30.160.GENE3D); IPR013087 (G3DSA:3.30.160.GENE3D); PTHR24409 (PANTHER); IPR007087 (PROSITE_PATTERNS); IPR007087 (PROSITE_PROFILES); SSF57667 (SUPERFAMILY)                                                                               |
| 74 | 128210_length_198_cvg_21.3_tip_0_0 | 17 | stearoyl- desaturase partial                                                | 66 | 3.32E-28 | 88.10%  | 0.263 | IPR015876 (PRINTS); PTHR11351 (PANTHER); PTHR11351:SF28 (PANTHER); CYTOPLASMIC_DOMAIN (PHOBIUS); NON_CYTOPLASMIC_DOMAIN (PHOBIUS); TRANSMEMBRANE (PHOBIUS); TMhelix (TMHMM)                                                                                                                    |
| 75 | 128230_length_198_cvg_34.0_tip_0_3 | 18 | fatty acid                                                                  | 66 | 2.45E-28 | 87.40%  | 0.262 | IPR015876 (PRINTS); PTHR11351 (PANTHER); TRANSMEMBRANE (PHOBIUS); CYTOPLASMIC_DOMAIN (PHOBIUS); NON_CYTOPLASMIC_DOMAIN (PHOBIUS); TMhelix (TMHMM)                                                                                                                                              |
| 77 | 128768_length_199_cvg_2.0_tip_1_2  | 2  | protein kinase c-binding protein nell1-like                                 | 66 | 4.08E-21 | 84.90%  | 0.148 | PTHR24042:SF4 (PANTHER); PTHR24042 (PANTHER)                                                                                                                                                                                                                                                   |
| 76 | 128360_length_199_cvg_2.9_tip_1_3  | 3  | xanthine dehydrogenase oxidase                                              | 67 | 1.05E-26 | 82.80%  | 0.106 | IPR008274 (PFAM); IPR008274 (G3DSA:3.30.365.GENE3D); PTHR11908:SF32 (PANTHER); PTHR11908 (PANTHER); IPR008274 (SUPERFAMILY)                                                                                                                                                                    |
| 78 | 128970_length_200_cvg_2.0_tip_1_3  | 3  | zinc finger partial                                                         | 67 | 3.74E-07 | 58.30%  | 0.102 | PF13465 (PFAM); IPR013087 (G3DSA:3.30.160.GENE3D); IPR013087 (G3DSA:3.30.160.GENE3D); PTHR24409 (PANTHER); PTHR24409:SF20 (PANTHER); IPR007087 (PROSITE_PATTERNS); IPR007087 (PROSITE_PROFILES); SSF57667 (SUPERFAMILY)                                                                        |
| 79 | 129482_length_201_cvg_2.0_tip_1_0  | 0  | angiotensin-converting enzyme                                               | 67 | 5.20E-30 | 85.80%  | 0.113 | IPR001548 (PRINTS); IPR001548 (PFAM); IPR001548 (PANTHER); SSF55486 (SUPERFAMILY)                                                                                                                                                                                                              |
| 80 | 130160_length_202_cvg_3.6_tip_1_5  | 5  | epididymal sperm-binding protein 1                                          | 67 | 3.97E-07 | 58.33%  | 0.113 | IPR000562 (SMART); IPR000562 (G3DSA:2.10.10.GENE3D); IPR000562 (PFAM); IPR000562 (PROSITE_PROFILES); IPR013806 (SUPERFAMILY)                                                                                                                                                                   |
| 81 | 130698_length_203_cvg_3.0_tip_1_1  | 2  | lysosomal alpha-glucosidase-like                                            | 68 | 6.55E-27 | 83.70%  | 0.108 | IPR000322 (PFAM); PTHR22762:SF69 (PANTHER); PTHR22762 (PANTHER); IPR017853 (SUPERFAMILY)                                                                                                                                                                                                       |



|     |                                     |     |                                                                  |    |          |        |         |                                                                                                                                                                                                                                                                                                                                                                                  |
|-----|-------------------------------------|-----|------------------------------------------------------------------|----|----------|--------|---------|----------------------------------------------------------------------------------------------------------------------------------------------------------------------------------------------------------------------------------------------------------------------------------------------------------------------------------------------------------------------------------|
| 82  | 132066_length_206_cvg_2.0_tip_1_5   | 2   | ankyrin repeat domain-containing protein 49                      | 68 | 4.98E-09 | 64.70% | 0.555 Y | IPR002110 (SMART); IPR020683 (PFAM); IPR020683 (G3DSA:1.25.40.GENE3D); PTHR24188 (PANTHER); NON_CYTOPLASMIC_DOMAIN (PHOBIUS); SIGNAL_PEPTIDE (PHOBIUS); SIGNAL_PEPTIDE_H_REGION (PHOBIUS); SIGNAL_PEPTIDE_N_REGION (PHOBIUS); SIGNAL_PEPTIDE_C_REGION (PHOBIUS); IPR002110 (PROSITE_PROFILES); IPR020683 (PROSITE_PROFILES); SignalP-noTM (SIGNALP_EUK); IPR020683 (SUPERFAMILY) |
| 83  | 133900_length_210_cvg_2.0_tip_1_5   | 3   | gastrula zinc finger protein - partial                           | 70 | 4.74E-16 | 69.10% | 0.104   | IPR015880 (SMART); IPR013087 (G3DSA:3.30.160.GENE3D); IPR013087 (G3DSA:3.30.160.GENE3D); PF13465 (PFAM); PTHR24409 (PANTHER); IPR007087 (PROSITE_PATTERNS); IPR007087 (PROSITE_PROFILES); IPR007087 (PROSITE_PROFILES); SSF57667 (SUPERFAMILY)                                                                                                                                   |
| 84  | 133914_length_210_cvg_11.8_tip_1_0  | 18  | glucose dehydrogenase                                            | 70 | 1.41E-09 | 75.90% | 0.24    | IPR000172 (PFAM); G3DSA:3.50.50.60 (GENE3D); PTHR11552:SF77 (PANTHER); PTHR11552 (PANTHER); IPR000172 (PROSITE_PATTERNS); SSF51905 (SUPERFAMILY)                                                                                                                                                                                                                                 |
| 85  | 134808_length_212_cvg_84.8_tip_1_3  | 563 | ---NA---                                                         | 71 |          |        | 0.316   | IPR000716 (G3DSA:4.10.800.GENE3D); CYTOPLASMIC_DOMAIN (PHOBIUS); NON_CYTOPLASMIC_DOMAIN (PHOBIUS); TRANSMEMBRANE (PHOBIUS); IPR000716 (PROSITE_PROFILES); SignalP-TM (SIGNALP_GRAM_POSITIVE); IPR000716 (SUPERFAMILY); TMhelix (TMHMM)                                                                                                                                           |
| 86  | 134910_length_212_cvg_4.0_tip_1_0   | 0   | ectonucleotide pyrophosphatase phosphodiesterase family member 3 | 71 | 7.18E-12 | 73.40% | 0.156   | IPR002591 (PFAM); IPR017849 (G3DSA:3.40.720.GENE3D); IPR024873 (PANTHER); IPR017850 (SUPERFAMILY)                                                                                                                                                                                                                                                                                |
| 87  | 134978_length_212_cvg_2.0_tip_1_0   | 2   | aminopeptidase n                                                 | 71 | 1.99E-14 | 64.30% | 0.114   | G3DSA:1.10.390.10 (GENE3D); PTHR11533:SF148 (PANTHER); IPR001930 (PANTHER); SSF55486 (SUPERFAMILY)                                                                                                                                                                                                                                                                               |
| 88  | 135286_length_212_cvg_2.0_tip_1_1   | 1   | plexin- partial                                                  | 71 | 2.10E-30 | 87.60% | 0.099   | IPR015943 (G3DSA:2.130.10.GENE3D); IPR001627 (PFAM); PTHR22625 (PANTHER); PTHR22625:SF16 (PANTHER); IPR001627 (PROSITE_PROFILES); IPR001627 (SUPERFAMILY); TMhelix (TMHMM)                                                                                                                                                                                                       |
| 89  | 135342_length_213_cvg_4.0_tip_1_2   | 7   | allatostatin neuropeptide precursor                              | 71 | 9.50E-12 | 69.40% | 0.105   | IPR010276 (PFAM)                                                                                                                                                                                                                                                                                                                                                                 |
| 90  | 135558_length_213_cvg_17.0_tip_1_2  | 17  | serpin b10                                                       | 71 | 1.28E-12 | 68.30% | 0.137   | IPR023796 (PFAM); G3DSA:3.30.497.10 (GENE3D); IPR000215 (PANTHER); IPR023796 (SUPERFAMILY)                                                                                                                                                                                                                                                                                       |
| 91  | 135936_length_214_cvg_4.0_tip_1_5   | 6   | neuroligin- x- partial                                           | 71 | 1.65E-08 | 62.40% | 0.279   | IPR029058 (G3DSA:3.40.50.GENE3D); IPR002018 (PFAM); PTHR11559 (PANTHER); IPR029058 (SUPERFAMILY)                                                                                                                                                                                                                                                                                 |
| 93  | 136164_length_214_cvg_104.9_tip_0_1 | 593 | unnamed protein product                                          | 71 | 1.62E-06 | 60.00% | 0.182   | IPR002350 (SMART); IPR002350 (PFAM); G3DSA:3.30.60.30 (GENE3D); IPR002350 (PROSITE_PROFILES); SSF100895 (SUPERFAMILY)                                                                                                                                                                                                                                                            |
| 92  | 136140_length_214_cvg_2.0_tip_1_0   | 4   | lactase-phlorizin hydrolase                                      | 72 | 1.90E-23 | 77.80% | 0.109   | IPR001360 (PRINTS); IPR001360 (PFAM); IPR013781 (G3DSA:3.20.20.GENE3D); IPR001360 (PANTHER); IPR017853 (SUPERFAMILY)                                                                                                                                                                                                                                                             |
| 94  | 136796_length_216_cvg_2.0_tip_1_3   | 2   | serine proteinase stubble-like                                   | 72 | 7.24E-21 | 73.00% | 0.118   | IPR001254 (PFAM); G3DSA:2.40.10.10 (GENE3D); PTHR24276 (PANTHER); IPR018114 (PROSITE_PATTERNS); IPR001254 (PROSITE_PROFILES); IPR009003 (SUPERFAMILY)                                                                                                                                                                                                                            |
| 95  | 137262_length_216_cvg_2.0_tip_1_0   | 2   | ---NA---                                                         | 72 |          |        | 0.13    | no IPS match                                                                                                                                                                                                                                                                                                                                                                     |
| 96  | 137368_length_217_cvg_3.9_tip_1_5   | 28  | glutamine-rich protein 2                                         | 72 | 3.69E-09 | 63.00% | 0.102   | PR01217 (PRINTS)                                                                                                                                                                                                                                                                                                                                                                 |
| 97  | 137538_length_217_cvg_2.0_tip_1_4   | 5   | ---NA---                                                         | 72 |          |        | 0.103   | IPR014020 (PFAM); G3DSA:2.60.40.1110 (GENE3D); IPR000008 (SUPERFAMILY)                                                                                                                                                                                                                                                                                                           |
| 98  | 137568_length_217_cvg_63.0_tip_0_5  | 504 | probable endoglycoceramidase                                     | 72 | 2.77E-21 | 70.40% | 0.119   | IPR013781 (G3DSA:3.20.20.GENE3D); IPR001547 (PFAM); PTHR31308 (PANTHER); IPR017853 (SUPERFAMILY)                                                                                                                                                                                                                                                                                 |
| 99  | 137624_length_217_cvg_3.0_tip_1_4   | 4   | glyceraldehyde-3-phosphate dehydrogenase                         | 72 | 9.07E-17 | 72.80% | 0.102   | IPR020828 (SMART); IPR020828 (PFAM); IPR016040 (G3DSA:3.40.50.GENE3D); IPR020831 (PANTHER); SSF51735 (SUPERFAMILY)                                                                                                                                                                                                                                                               |
| 100 | 137784_length_218_cvg_25.7_tip_1_1  | 33  | hemagglutinin amebocyte aggregation factor-like                  | 73 | 2.41E-13 | 63.70% | 0.108   | PF14704 (PFAM); IPR026645 (PANTHER)                                                                                                                                                                                                                                                                                                                                              |
| 101 | 138088_length_218_cvg_2.0_tip_1_4   | 3   | ankyrin repeat domain-containing protein 29-like                 | 73 | 2.35E-12 | 63.50% | 0.103   | IPR002110 (SMART); IPR020683 (G3DSA:1.25.40.GENE3D); IPR020683 (PFAM); PTHR24188 (PANTHER); IPR020683 (PROSITE_PROFILES); IPR002110 (PROSITE_PROFILES); IPR002110 (PROSITE_PROFILES); IPR020683 (SUPERFAMILY)                                                                                                                                                                    |
| 102 | 138150_length_218_cvg_2.0_tip_1_0   | 2   | transferrin                                                      | 73 | 9.85E-16 | 70.60% | 0.099   | IPR001156 (PRINTS); IPR001156 (PFAM); G3DSA:3.40.190.10 (GENE3D); PTHR11485:SF18 (PANTHER); PTHR11485 (PANTHER); IPR001156 (PROSITE_PROFILES); SSF53850 (SUPERFAMILY)                                                                                                                                                                                                            |
| 103 | 138792_length_219_cvg_2.0_tip_1_3   | 3   | fad-linked sulfhydryl oxidase partial                            | 73 | 3.12E-32 | 81.00% | 0.155   | IPR017905 (PFAM); IPR017905 (G3DSA:1.20.120.GENE3D); PTHR12645 (PANTHER); IPR017905 (PROSITE_PROFILES); IPR017905 (SUPERFAMILY)                                                                                                                                                                                                                                                  |
| 104 | 138936_length_220_cvg_2.0_tip_1_2   | 4   | peptidyl-prolyl cis-trans cyclophilin-type family                | 73 | 1.49E-34 | 88.50% | 0.122   | IPR002130 (PRINTS); IPR029000 (G3DSA:2.40.100.GENE3D); IPR002130 (PFAM); IPR024936 (PANTHER); IPR002130 (PROSITE_PROFILES); IPR029000 (SUPERFAMILY)                                                                                                                                                                                                                              |
| 105 | 139150_length_220_cvg_2.0_tip_1_3   | 4   | gamma-glutamyl hydrolase-like                                    | 74 | 1.43E-15 | 75.30% | 0.105   | IPR029062 (G3DSA:3.40.50.GENE3D); IPR011697 (PFAM); PTHR11315:SF2 (PANTHER); IPR015527 (PANTHER)                                                                                                                                                                                                                                                                                 |
| 106 | 139391_length_221_cvg_4.1_tip_1_3   | 6   | ---NA---                                                         | 74 |          |        | 0.107   | IPR001846 (PFAM); IPR001846 (PROSITE_PROFILES)                                                                                                                                                                                                                                                                                                                                   |
| 107 | 139997_length_222_cvg_3.0_tip_1_0   | 5   | colostrum trypsin inhibitor-like                                 | 74 | 5.32E-16 | 71.50% | 0.103   | IPR002223 (PRINTS); IPR002223 (SMART); IPR002223 (PFAM); IPR002223 (G3DSA:4.10.410.GENE3D); PTHR10083 (PANTHER); IPR020901 (PROSITE_PATTERNS); IPR002223 (PROSITE_PROFILES); IPR002223 (SUPERFAMILY)                                                                                                                                                                             |



|     |                                     |      |                                                                                                                                 |    |          |        |         |                                                                                                                                                                                                                                                                                                                                                           |
|-----|-------------------------------------|------|---------------------------------------------------------------------------------------------------------------------------------|----|----------|--------|---------|-----------------------------------------------------------------------------------------------------------------------------------------------------------------------------------------------------------------------------------------------------------------------------------------------------------------------------------------------------------|
| 108 | 140211_length_222_cvg_9.5_tip_1_3   | 12   | insulin-like receptor                                                                                                           | 74 | 2.66E-29 | 80.20% | 0.107   | G3DSA:1.10.510.10 (GENE3D); IPR001245 (PFAM); PTHR24416 (PANTHER); PTHR24416:SF254 (PANTHER); IPR011009 (SUPERFAMILY)                                                                                                                                                                                                                                     |
| 109 | 140481_length_223_cvg_2.0_tip_1_4   | 1    | phosphodiesterase i                                                                                                             | 74 | 9.33E-15 | 62.90% | 0.178   | IPR017849 (G3DSA:3.40.720.GENE3D); IPR002591 (PFAM); IPR024873 (PANTHER); IPR017850 (SUPERFAMILY)                                                                                                                                                                                                                                                         |
| 110 | 140609_length_223_cvg_2.0_tip_1_5   | 4    | ankyrin repeat and sterile alpha motif domain-containing protein 1b                                                             | 74 | 9.38E-27 | 93.20% | 0.107   | IPR002110 (SMART); IPR020683 (G3DSA:1.25.40.GENE3D); IPR020683 (PFAM); PTHR24174 (PANTHER); IPR020683 (PROSITE_PROFILES); IPR002110 (PROSITE_PROFILES); IPR002110 (PROSITE_PROFILES); IPR020683 (SUPERFAMILY)                                                                                                                                             |
| 111 | 140885_length_223_cvg_2.0_tip_1_2   | 4    | endothelial zinc finger protein induced by tumor necrosis factor partial                                                        | 74 | 7.77E-17 | 64.90% | 0.112   | IPR015880 (SMART); IPR013087 (G3DSA:3.30.160.GENE3D); PF13465 (PFAM); IPR013087 (G3DSA:3.30.160.GENE3D); IPR013087 (G3DSA:3.30.160.GENE3D); PTHR24409 (PANTHER); IPR007087 (PROSITE_PATTERNS); IPR007087 (PROSITE_PATTERNS); IPR007087 (PROSITE_PROFILES); IPR007087 (PROSITE_PROFILES); SSF57667 (SUPERFAMILY)                                           |
| 112 | 141043_length_224_cvg_3.0_tip_1_4   | 4    | sparc-related modular calcium-binding protein partial                                                                           | 75 | 4.48E-21 | 73.90% | 0.1     | IPR019577 (PFAM); IPR011992 (G3DSA:1.10.238.GENE3D); PTHR12352 (PANTHER); IPR018247 (PROSITE_PATTERNS); SSF47473 (SUPERFAMILY)                                                                                                                                                                                                                            |
| 113 | 141131_length_224_cvg_2.0_tip_1_3   | 4    | low density lipoprotein receptor-related protein 5 isoform cra_a                                                                | 75 | 4.36E-06 | 57.00% | 0.103   | IPR002172 (SMART); IPR002172 (G3DSA:4.10.400.GENE3D); IPR002172 (PFAM); IPR023415 (PROSITE_PATTERNS); IPR002172 (PROSITE_PROFILES); IPR002172 (SUPERFAMILY)                                                                                                                                                                                               |
| 114 | 141465_length_225_cvg_15.8_tip_1_0  | 24   | transcriptional regulator atrx homolog                                                                                          | 75 | 3.24E-09 | 60.00% | 0.1     | no IPS match                                                                                                                                                                                                                                                                                                                                              |
| 115 | 141927_length_225_cvg_3.0_tip_1_0   | 4    | esterase e4-like                                                                                                                | 75 | 3.48E-25 | 78.10% | 0.201   | IPR002018 (PFAM); IPR029058 (G3DSA:3.40.50.GENE3D); PTHR11559 (PANTHER); IPR029058 (SUPERFAMILY)                                                                                                                                                                                                                                                          |
| 120 | 142911_length_227_cvg_37.8_tip_1_5  | 53   | gram positive anchor                                                                                                            | 75 | 3.77E-11 | 55.00% | 0.176   | no IPS match                                                                                                                                                                                                                                                                                                                                              |
| 121 | 143127_length_227_cvg_2.0_tip_1_2   | 3    | signal cub and egf-like domain-containing protein 1 isoform x1                                                                  | 75 | 1.23E-20 | 79.20% | 0.123   | PTHR24046 (PANTHER); PTHR24046:SF4 (PANTHER)                                                                                                                                                                                                                                                                                                              |
| 116 | 142017_length_226_cvg_2.0_tip_1_0   | 3    | low quality protein: kinase d-interacting substrate of 220 kda-like                                                             | 76 | 6.50E-32 | 85.30% | 0.105   | IPR002110 (SMART); IPR020683 (G3DSA:1.25.40.GENE3D); IPR020683 (PFAM); PTHR24139 (PANTHER); PTHR24139:SF10 (PANTHER); IPR002110 (PROSITE_PROFILES); IPR020683 (PROSITE_PROFILES); IPR020683 (SUPERFAMILY)                                                                                                                                                 |
| 117 | 142265_length_226_cvg_115.4_tip_1_0 | 2726 | anti-lipopolysaccharide factor isoform 7                                                                                        | 76 | 1.47E-08 | 57.50% | 0.909 Y | IPR024509 (PFAM); NON_CYTOPLASMIC_DOMAIN (PHOBIUS); SIGNAL_PEPTIDE_N_REGION (PHOBIUS); SIGNAL_PEPTIDE_C_REGION (PHOBIUS); SIGNAL_PEPTIDE_H_REGION (PHOBIUS); SIGNAL_PEPTIDE (PHOBIUS); IPR024716 (PRODOM); SignalP-noTM (SIGNALP_EUK); SignalP-TM (SIGNALP_GRAM_POSITIVE); TMhelix (TMHMM)                                                                |
| 118 | 142449_length_226_cvg_3.0_tip_1_3   | 6    | carboxypeptidase b-like                                                                                                         | 76 | 3.85E-25 | 78.80% | 0.137   | G3DSA:3.40.630.10 (GENE3D); IPR000834 (PFAM); PTHR11705:SF61 (PANTHER); PTHR11705 (PANTHER); SSF53187 (SUPERFAMILY)                                                                                                                                                                                                                                       |
| 119 | 142567_length_227_cvg_2.0_tip_1_1   | 3    | er degradation-enhancing alpha-mannosidase-like 3                                                                               | 76 | 3.42E-31 | 90.80% | 0.108   | IPR001382 (PFAM); IPR001382 (G3DSA:1.50.10.GENE3D); IPR001382 (PANTHER); PTHR11742:SF38 (PANTHER); IPR001382 (SUPERFAMILY)                                                                                                                                                                                                                                |
| 122 | 143285_length_228_cvg_2.0_tip_1_3   | 3    | lutropin-choriogonadotropic hormone receptor                                                                                    | 76 | 3.10E-06 | 59.50% | 0.113   | G3DSA:3.80.10.10 (GENE3D); IPR001611 (PFAM); PTHR24373 (PANTHER); IPR001611 (PROSITE_PROFILES); IPR001611 (PROSITE_PROFILES); IPR001611 (PROSITE_PROFILES); SSF52058 (SUPERFAMILY)                                                                                                                                                                        |
| 123 | 143623_length_228_cvg_2.0_tip_1_5   | 3    | aael015439- partial                                                                                                             | 76 | 5.13E-30 | 79.20% | 0.163   | IPR001254 (PFAM); G3DSA:2.40.10.10 (GENE3D); G3DSA:2.40.10.10 (GENE3D); PTHR24256 (PANTHER); PTHR24256:SF103 (PANTHER); IPR009003 (SUPERFAMILY); TMhelix (TMHMM)                                                                                                                                                                                          |
| 124 | 143747_length_228_cvg_3.0_tip_1_5   | 6    | d chain coupling of remote alternating-access transport mechanisms for protons and substrates in the multidrug efflux pump acrb | 76 | 3.13E-13 | 62.20% | 0.144   | IPR002110 (SMART); IPR020683 (PFAM); IPR020683 (G3DSA:1.25.40.GENE3D); PTHR24182 (PANTHER); IPR020683 (PROSITE_PROFILES); IPR002110 (PROSITE_PROFILES); IPR002110 (PROSITE_PROFILES); IPR020683 (SUPERFAMILY)                                                                                                                                             |
| 125 | 144217_length_229_cvg_9.2_tip_1_5   | 11   | PREDICTED: hyaluronidase-1-like                                                                                                 | 76 | 2.47E-06 | 63.00% | 0.105   | IPR018155 (PFAM); IPR013785 (G3DSA:3.20.20.GENE3D); IPR017853 (SUPERFAMILY)                                                                                                                                                                                                                                                                               |
| 126 | 144573_length_230_cvg_2.0_tip_1_3   | 3    | heat shock protein partial                                                                                                      | 77 | 2.36E-35 | 88.10% | 0.104   | IPR013126 (PRINTS); G3DSA:3.30.420.40 (GENE3D); G3DSA:3.30.30.30 (GENE3D); IPR013126 (PFAM); PTHR19375:SF137 (PANTHER); PTHR19375 (PANTHER); IPR018181 (PROSITE_PATTERNS); SSF53067 (SUPERFAMILY)                                                                                                                                                         |
| 127 | 145295_length_231_cvg_2.0_tip_1_2   | 5    | prolyl 4- beta subunit                                                                                                          | 77 | 7.18E-18 | 70.60% | 0.113   | IPR012336 (G3DSA:3.40.30.GENE3D); PTHR18929 (PANTHER); PTHR18929:SF74 (PANTHER); IPR012336 (SUPERFAMILY)                                                                                                                                                                                                                                                  |
| 128 | 145327_length_231_cvg_2.0_tip_1_3   | 3    | zinc finger protein 109                                                                                                         | 77 | 2.31E-14 | 60.20% | 0.146   | IPR015880 (SMART); PF13465 (PFAM); IPR013087 (G3DSA:3.30.160.GENE3D); IPR013087 (G3DSA:3.30.160.GENE3D); IPR007087 (PFAM); IPR013087 (G3DSA:3.30.160.GENE3D); PTHR24409 (PANTHER); IPR007087 (PROSITE_PATTERNS); IPR007087 (PROSITE_PATTERNS); IPR007087 (PROSITE_PROFILES); IPR007087 (PROSITE_PROFILES); SSF57667 (SUPERFAMILY); SSF57667 (SUPERFAMILY) |
| 129 | 145649_length_231_cvg_3.0_tip_1_3   | 5    | zinc c2h2 type                                                                                                                  | 77 | 3.25E-11 | 62.50% | 0.118   | IPR015880 (SMART); IPR013087 (G3DSA:3.30.160.GENE3D); PF13465 (PFAM); IPR013087 (G3DSA:3.30.160.GENE3D); PTHR24409 (PANTHER); PTHR24409:SF13 (PANTHER); IPR007087 (PROSITE_PATTERNS); IPR007087 (PROSITE_PATTERNS); IPR007087 (PROSITE_PROFILES); IPR007087 (PROSITE_PROFILES); SSF57667 (SUPERFAMILY)                                                    |

|     |                                    |      |                                                                                               |    |          |        |         |                                                                                                                                                                                                                                                                                                                        |
|-----|------------------------------------|------|-----------------------------------------------------------------------------------------------|----|----------|--------|---------|------------------------------------------------------------------------------------------------------------------------------------------------------------------------------------------------------------------------------------------------------------------------------------------------------------------------|
| 130 | 145901_length_232_cvg_2.0_tip_1_4  | 4    | fat-like cadherin-related tumor suppressor homolog isoform x3                                 | 77 | 3.34E-13 | 63.80% | 0.114   | IPR002126 (G3DSA:2.60.40.GENE3D); IPR002126 (PFAM); PTHR24028 (PANTHER); IPR002126 (PROSITE_PROFILES); IPR015919 (SUPERFAMILY)                                                                                                                                                                                         |
| 131 | 145965_length_232_cvg_2.0_tip_1_1  | 2    | zinc finger protein 502-like                                                                  | 77 | 2.12E-14 | 67.00% | 0.099   | IPR015880 (SMART); IPR013087 (G3DSA:3.30.160.GENE3D); IPR013087 (G3DSA:3.30.160.GENE3D); PF13894 (PFAM); PTHR24409 (PANTHER); PTHR24409:SF14 (PANTHER); IPR007087 (PROSITE_PATTERNS); IPR007087 (PROSITE_PROFILES); IPR007087 (PROSITE_PROFILES); SSF57667 (SUPERFAMILY)                                               |
| 133 | 146185_length_232_cvg_2.0_tip_1_4  | 7    | 26s protease regulatory subunit 6a-b                                                          | 77 | 1.32E-45 | 99.60% | 0.102   | IPR003959 (PFAM); IPR027417 (G3DSA:3.40.50.GENE3D); PTHR23073:SF7 (PANTHER); PTHR23073 (PANTHER); IPR027417 (SUPERFAMILY)                                                                                                                                                                                              |
| 135 | 146945_length_233_cvg_2.4_tip_1_5  | 6    | gamma-glutamyl hydrolase                                                                      | 77 | 1.78E-13 | 63.80% | 0.116   | IPR029062 (G3DSA:3.40.50.GENE3D); IPR015527 (PANTHER)                                                                                                                                                                                                                                                                  |
| 132 | 145969_length_232_cvg_2.0_tip_1_3  | 4    | beta- -n-acetylgalactosaminyltransferase bre-4                                                | 78 | 4.90E-42 | 88.40% | 0.128   | IPR003859 (PRINTS); IPR029044 (G3DSA:3.90.550.GENE3D); IPR027791 (PFAM); PTHR19300:SF30 (PANTHER); IPR003859 (PANTHER); IPR029044 (SUPERFAMILY)                                                                                                                                                                        |
| 134 | 146727_length_233_cvg_2.0_tip_1_3  | 5    | pancreatic triacylglycerol lipase-like                                                        | 78 | 2.12E-28 | 78.60% | 0.108   | IPR013818 (PFAM); IPR029058 (G3DSA:3.40.50.GENE3D); IPR000734 (PANTHER); IPR029058 (SUPERFAMILY)                                                                                                                                                                                                                       |
| 136 | 147193_length_234_cvg_2.0_tip_1_1  | 1    | carboxypeptidase b-like                                                                       | 78 | 3.05E-21 | 80.70% | 0.148   | IPR000834 (PRINTS); IPR000834 (PFAM); G3DSA:3.40.630.10 (GENE3D); PTHR11705 (PANTHER); IPR000834 (PROSITE_PATTERNS); SSF53187 (SUPERFAMILY)                                                                                                                                                                            |
| 137 | 147511_length_234_cvg_2.0_tip_1_1  | 5    | phospholipase a2 isozyme partial                                                              | 78 | 1.90E-09 | 67.10% | 0.098   | IPR001211 (PFAM); IPR016090 (G3DSA:1.20.90.GENE3D); IPR016090 (SUPERFAMILY)                                                                                                                                                                                                                                            |
| 138 | 147779_length_234_cvg_2.0_tip_1_1  | 4    | syntaxin partial                                                                              | 78 | 9.56E-18 | 78.90% | 0.1     | Coil (COILS); IPR000727 (SMART); IPR000727 (PFAM); G3DSA:1.20.5.110 (GENE3D); IPR028669 (PTHR19957:PANTHER); PTHR19957 (PANTHER); IPR006012 (PROSITE_PATTERNS); IPR000727 (PROSITE_PROFILES); IPR010989 (SUPERFAMILY)                                                                                                  |
| 139 | 147899_length_234_cvg_2.0_tip_1_0  | 3    | vacuolar-sorting protein snf8-like                                                            | 78 | 3.01E-18 | 92.20% | 0.19    | Coil (COILS); IPR007286 (PFAM); PTHR12806:SF0 (PANTHER); IPR007286 (PANTHER)                                                                                                                                                                                                                                           |
| 140 | 148541_length_235_cvg_12.0_tip_1_1 | 2    | vktti_najna ame: full=kunitz-type serine protease inhibitor ame: full=venom trypsin inhibitor | 78 | 1.60E-14 | 72.40% | 0.122   | IPR002223 (PRINTS); IPR002223 (SMART); IPR002223 (G3DSA:4.10.410.GENE3D); IPR002223 (PFAM); PTHR10083 (PANTHER); IPR020901 (PROSITE_PATTERNS); IPR002223 (PROSITE_PROFILES); IPR002223 (SUPERFAMILY)                                                                                                                   |
| 141 | 149653_length_236_cvg_2.0_tip_1_1  | 4    | zinc c2h2 type domain-containing protein                                                      | 79 | 4.73E-18 | 62.80% | 0.108   | IPR015880 (SMART); PF13465 (PFAM); IPR013087 (G3DSA:3.30.160.GENE3D); PTHR24409 (PANTHER); IPR007087 (PROSITE_PATTERNS); IPR007087 (PROSITE_PATTERNS); IPR007087 (PROSITE_PROFILES); IPR007087 (PROSITE_PROFILES); SSF57667 (SUPERFAMILY); SSF57667 (SUPERFAMILY)                                                      |
| 142 | 149803_length_237_cvg_2.0_tip_1_5  | 5    | plexin- partial                                                                               | 79 | 1.62E-40 | 96.80% | 0.404 Y | IPR013548 (PFAM); PTHR22625 (PANTHER); IPR008936 (SUPERFAMILY)                                                                                                                                                                                                                                                         |
| 143 | 150497_length_237_cvg_12.2_tip_1_4 | 20   | adp-ribosylation factor                                                                       | 79 | 8.89E-10 | 88.80% | 0.249   | IPR027417 (G3DSA:3.40.50.GENE3D); IPR006689 (PFAM); PTHR11711:SF142 (PANTHER); PTHR11711 (PANTHER); IPR027417 (SUPERFAMILY)                                                                                                                                                                                            |
| 144 | 150837_length_238_cvg_2.0_tip_1_1  | 3    | zinc finger protein 543                                                                       | 79 | 1.13E-12 | 57.30% | 0.111   | IPR015880 (SMART); IPR013087 (G3DSA:3.30.160.GENE3D); IPR013087 (G3DSA:3.30.160.GENE3D); PF13894 (PFAM); PF13465 (PFAM); PTHR24409:SF14 (PANTHER); PTHR24409 (PANTHER); IPR007087 (PROSITE_PATTERNS); IPR007087 (PROSITE_PATTERNS); IPR007087 (PROSITE_PROFILES); IPR007087 (PROSITE_PROFILES); SSF57667 (SUPERFAMILY) |
| 145 | 150891_length_238_cvg_2.7_tip_1_2  | 4    | cd4-specific ankyrin repeat protein                                                           | 79 | 3.34E-10 | 61.10% | 0.118   | IPR002110 (PRINTS); IPR002110 (SMART); IPR020683 (G3DSA:1.25.40.GENE3D); IPR020683 (PFAM); PTHR24198 (PANTHER); IPR002110 (PROSITE_PROFILES); IPR020683 (PROSITE_PROFILES); IPR002110 (PROSITE_PROFILES); IPR020683 (SUPERFAMILY)                                                                                      |
| 146 | 151231_length_238_cvg_2.0_tip_1_5  | 3    | endothelin-converting enzyme 1 isoform x3                                                     | 79 | 1.48E-24 | 79.20% | 0.394 Y | IPR008753 (PFAM); G3DSA:1.10.1380.10 (GENE3D); IPR029733 (PTHR11733:PANTHER); IPR000718 (PANTHER); SSF55486 (SUPERFAMILY)                                                                                                                                                                                              |
| 147 | 151369_length_238_cvg_2.0_tip_1_2  | 3    | mam and ldl-receptor class a domain-containing protein 1-like                                 | 79 | 3.15E-10 | 58.38% | 0.118   | IPR000998 (PFAM); IPR000998 (PROSITE_PROFILES); IPR013320 (SUPERFAMILY)                                                                                                                                                                                                                                                |
| 148 | 151459_length_238_cvg_3.0_tip_1_4  | 4    | protein creg1                                                                                 | 79 | 8.82E-20 | 74.90% | 0.12    | IPR012349 (G3DSA:2.30.110.GENE3D); PF13883 (PFAM); PTHR13343:SF17 (PANTHER); PTHR13343 (PANTHER); IPR012349 (SUPERFAMILY)                                                                                                                                                                                              |
| 149 | 151739_length_239_cvg_45.0_tip_1_3 | 62   | 14-3-3 protein zeta isoform x1                                                                | 80 | 1.06E-43 | 91.60% | 0.108   | IPR000308 (PRINTS); G3DSA:1.20.190.20 (GENE3D); IPR023410 (PFAM); IPR000308 (PANTHER); IPR023410 (SUPERFAMILY)                                                                                                                                                                                                         |
| 150 | 152047_length_239_cvg_2.9_tip_1_4  | 8    | n-sulphoglucosamine sulphohydrolase                                                           | 80 | 2.21E-22 | 86.20% | 0.115   | IPR000917 (PFAM); IPR017849 (G3DSA:3.40.720.GENE3D); PTHR10342 (PANTHER); PTHR10342:SF76 (PANTHER); IPR024607 (PROSITE_PATTERNS); IPR017850 (SUPERFAMILY)                                                                                                                                                              |
| 151 | 152999_length_240_cvg_2.0_tip_1_0  | 5    | low-density lipoprotein receptor-related protein 2                                            | 80 | 9.38E-38 | 85.80% | 0.107   | IPR002172 (PRINTS); IPR002172 (SMART); IPR002172 (PFAM); IPR002172 (G3DSA:4.10.400.GENE3D); PTHR10529 (PANTHER); IPR002172 (PROSITE_PROFILES); IPR002172 (SUPERFAMILY)                                                                                                                                                 |
| 152 | 153083_length_240_cvg_2.0_tip_1_5  | 5    | basement membrane-specific heparan sulfate proteoglycan core protein                          | 80 | 2.05E-25 | 65.90% | 0.108   | IPR013783 (G3DSA:2.60.40.GENE3D)                                                                                                                                                                                                                                                                                       |
| 153 | 153595_length_241_cvg_63.0_tip_0_2 | 3159 | probable chitinase 3                                                                          | 80 | 1.66E-24 | 72.50% | 0.099   | IPR001223 (PFAM); IPR013781 (G3DSA:3.20.20.GENE3D); PTHR11177 (PANTHER); PTHR11177:SF109 (PANTHER); IPR017853 (SUPERFAMILY)                                                                                                                                                                                            |

|     |                                    |    |                                                                                                        |    |          |                                                      |         |                                                                                                                                                                                                                                                                                                                                                                                                                    |  |  |
|-----|------------------------------------|----|--------------------------------------------------------------------------------------------------------|----|----------|------------------------------------------------------|---------|--------------------------------------------------------------------------------------------------------------------------------------------------------------------------------------------------------------------------------------------------------------------------------------------------------------------------------------------------------------------------------------------------------------------|--|--|
| 154 | 153649_length_241_cvg_3.0_tip_1_5  | 7  | ---                                                                                                    | 80 | 0.099    | IPR002413 (PRINTS); IPR014044 (G3DSA:3.40.33.GENE3D) |         |                                                                                                                                                                                                                                                                                                                                                                                                                    |  |  |
| 155 | 153699_length_241_cvg_2.0_tip_1_1  | 1  | serine threonine-protein kinase 10 isoform x3                                                          | 80 | 5.31E-45 | 95.20%                                               | 0.108   | G3DSA:1.10.510.10 (GENE3D); IPR000719 (PFAM); PTHR24361:SF249 (PANTHER); PTHR24361 (PANTHER); IPR008271 (PROSITE_PATTERNS); IPR000719 (PROSITE_PROFILES); IPR011009 (SUPERFAMILY)                                                                                                                                                                                                                                  |  |  |
| 156 | 153789_length_241_cvg_2.4_tip_1_5  | 5  | chemosensory protein 1 partial                                                                         | 80 | 1.13E-31 | 80.30%                                               | 0.107   | IPR005055 (PFAM); IPR005055 (G3DSA:1.10.2080.GENE3D); IPR005055 (PANTHER); PTHR11257:SF4 (PANTHER); IPR005055 (SUPERFAMILY)                                                                                                                                                                                                                                                                                        |  |  |
| 157 | 154119_length_241_cvg_2.0_tip_1_2  | 4  | fibrillin-2-like isoform x2                                                                            | 80 | 2.88E-32 | 81.90%                                               | 0.141   | IPR017878 (PFAM); IPR017878 (G3DSA:3.90.290.GENE3D); IPR011398 (PANTHER); IPR017878 (PROSITE_PROFILES); IPR017878 (SUPERFAMILY)                                                                                                                                                                                                                                                                                    |  |  |
| 158 | 154173_length_241_cvg_2.0_tip_1_2  | 4  | zinc finger and btb domain-containing protein                                                          | 80 | 5.33E-14 | 62.70%                                               | 0.106   | IPR015880 (SMART); IPR007087 (PFAM); PF13894 (PFAM); IPR013087 (G3DSA:3.30.160.GENE3D); IPR013087 (G3DSA:3.30.160.GENE3D); PTHR24409:SF13 (PANTHER); PTHR24409 (PANTHER); IPR007087 (PROSITE_PATTERNS); IPR007087 (PROSITE_PATTERNS); IPR007087 (PROSITE_PROFILES); IPR007087 (PROSITE_PROFILES); SSF57667 (SUPERFAMILY)                                                                                           |  |  |
| 159 | 154475_length_241_cvg_2.0_tip_1_3  | 5  | ankyrin repeat-containing protein                                                                      | 81 | 1.63E-07 | 65.00%                                               | 0.105   | IPR002110 (SMART); IPR020683 (G3DSA:1.25.40.GENE3D); IPR020683 (PFAM); IPR002110 (PROSITE_PROFILES); IPR020683 (PROSITE_PROFILES); IPR002110 (PROSITE_PROFILES); IPR020683 (SUPERFAMILY)                                                                                                                                                                                                                           |  |  |
| 160 | 154631_length_242_cvg_3.0_tip_1_0  | 5  | af296336_1collagen-like surface protein                                                                | 81 | 8.84E-06 | 56.00%                                               | 0.1     | IPR008160 (PFAM)                                                                                                                                                                                                                                                                                                                                                                                                   |  |  |
| 161 | 154955_length_242_cvg_2.0_tip_1_0  | 3  | prenylcysteine oxidase                                                                                 | 81 | 2.84E-13 | 62.60%                                               | 0.097   | IPR010795 (PFAM); IPR017046 (PANTHER)                                                                                                                                                                                                                                                                                                                                                                              |  |  |
| 162 | 155341_length_242_cvg_2.0_tip_1_3  | 3  | d chain in silico and in vitro co-evolution of a high affinity complementary protein-protein interface | 81 | 5.59E-10 | 62.80%                                               | 0.112   | IPR002110 (SMART); IPR020683 (PFAM); IPR020683 (G3DSA:1.25.40.GENE3D); PTHR24193 (PANTHER); IPR002110 (PROSITE_PROFILES); IPR020683 (PROSITE_PROFILES); IPR002110 (PROSITE_PROFILES); IPR020683 (SUPERFAMILY)                                                                                                                                                                                                      |  |  |
| 163 | 155465_length_242_cvg_2.0_tip_1_4  | 7  | neurogenic locus notch homolog protein 3-like                                                          | 81 | 2.41E-32 | 76.80%                                               | 0.133   | IPR004094 (G3DSA:2.10.22.GENE3D); IPR004094 (PFAM); PTHR19441 (PANTHER); PTHR19441:SF10 (PANTHER); IPR004094 (PROSITE_PROFILES); IPR011061 (SUPERFAMILY)                                                                                                                                                                                                                                                           |  |  |
| 164 | 155839_length_243_cvg_3.0_tip_1_3  | 7  | gastrula zinc finger                                                                                   | 81 | 1.72E-23 | 73.50%                                               | 0.099   | IPR015880 (SMART); PF13465 (PFAM); IPR013087 (G3DSA:3.30.160.GENE3D); IPR013087 (G3DSA:3.30.160.GENE3D); PTHR24409 (PANTHER); IPR007087 (PROSITE_PATTERNS); IPR007087 (PROSITE_PATTERNS); IPR007087 (PROSITE_PATTERNS); IPR007087 (PROSITE_PROFILES); IPR007087 (PROSITE_PROFILES); SSF57667 (SUPERFAMILY); SSF57667 (SUPERFAMILY)                                                                                 |  |  |
| 165 | 155869_length_243_cvg_2.0_tip_1_0  | 4  | low quality protein: cadherin-related tumor suppressor-like                                            | 81 | 1.37E-08 | 62.70%                                               | 0.126   | IPR000742 (SMART); G3DSA:2.10.25.10 (GENE3D); IPR000742 (PFAM); IPR013032 (PROSITE_PATTERNS); IPR000742 (PROSITE_PROFILES); SSF57196 (SUPERFAMILY)                                                                                                                                                                                                                                                                 |  |  |
| 166 | 156013_length_243_cvg_2.0_tip_1_2  | 6  | chemosensory protein-14                                                                                | 81 | 2.58E-39 | 89.00%                                               | 0.105   | IPR005055 (PFAM); IPR005055 (G3DSA:1.10.2080.GENE3D); PTHR11257:SF4 (PANTHER); IPR005055 (PANTHER); IPR005055 (SUPERFAMILY)                                                                                                                                                                                                                                                                                        |  |  |
| 167 | 156111_length_243_cvg_2.0_tip_1_2  | 7  | xanthine dehydrogenase oxidase                                                                         | 81 | 9.87E-28 | 77.60%                                               | 0.111   | IPR008274 (G3DSA:3.30.365.GENE3D); IPR008274 (PFAM); PTHR11908 (PANTHER); PTHR11908:SF32 (PANTHER); IPR008274 (SUPERFAMILY)                                                                                                                                                                                                                                                                                        |  |  |
| 168 | 156173_length_243_cvg_2.0_tip_1_2  | 4  | papain family cysteine protease                                                                        | 81 | 1.77E-29 | 78.30%                                               | 0.145   | IPR000668 (PFAM); G3DSA:3.90.70.10 (GENE3D); PTHR12411:SF15 (PANTHER); IPR013128 (PANTHER); SSF54001 (SUPERFAMILY)                                                                                                                                                                                                                                                                                                 |  |  |
| 169 | 156369_length_243_cvg_2.0_tip_1_5  | 5  | down syndrome cell adhesion molecule-like protein dscam2                                               | 81 | 1.37E-25 | 74.90%                                               | 0.163   | IPR003961 (PFAM); IPR013783 (G3DSA:2.60.40.GENE3D); PTHR10489 (PANTHER); PTHR10489:SF580 (PANTHER); IPR003961 (PROSITE_PROFILES); IPR003961 (SUPERFAMILY)                                                                                                                                                                                                                                                          |  |  |
| 170 | 156399_length_243_cvg_2.0_tip_1_2  | 5  | trehalase isoform x3                                                                                   | 81 | 1.92E-15 | 66.70%                                               | 0.105   | PTHR23403:SF1 (PANTHER); IPR001661 (PANTHER); IPR008928 (SUPERFAMILY)                                                                                                                                                                                                                                                                                                                                              |  |  |
| 171 | 156445_length_243_cvg_4.0_tip_1_3  | 7  | 5 -nucleotidase-like                                                                                   | 81 | 4.02E-20 | 71.10%                                               | 0.122   | IPR029052 (G3DSA:3.60.21.GENE3D); IPR006179 (PANTHER); PTHR11575:SF21 (PANTHER); IPR006146 (PROSITE_PATTERNS); IPR029052 (SUPERFAMILY)                                                                                                                                                                                                                                                                             |  |  |
| 172 | 156507_length_243_cvg_13.0_tip_1_0 | 22 | plasma alpha-l-fucosidase-like                                                                         | 81 | 1.05E-28 | 78.80%                                               | 0.581 Y | IPR013781 (G3DSA:3.20.20.GENE3D); IPR000933 (PFAM); PTHR10030:SF26 (PANTHER); IPR000933 (PANTHER); TRANSMEMBRANE (PHOBIUS); SIGNAL_PEPTIDE_H_REGION (PHOBIUS); SIGNAL_PEPTIDE (PHOBIUS); NON_CYTOPLASMIC_DOMAIN (PHOBIUS); CYTOPLASMIC_DOMAIN (PHOBIUS); SIGNAL_PEPTIDE_C_REGION (PHOBIUS); SIGNAL_PEPTIDE_N_REGION (PHOBIUS); SignalP-TM (SIGNALP_EUK); IPR017853 (SUPERFAMILY); TMhelix (TMHMM); TMhelix (TMHMM) |  |  |
| 173 | 156993_length_243_cvg_2.7_tip_1_4  | 5  | von willebrand factor type egf and pentraxin domain-containing protein 1-like                          | 81 | 1.35E-19 | 73.00%                                               | 0.106   | IPR000436 (SMART); IPR000436 (PFAM); G3DSA:2.10.70.10 (GENE3D); IPR000436 (PROSITE_PROFILES); IPR000436 (SUPERFAMILY)                                                                                                                                                                                                                                                                                              |  |  |
| 174 | 157621_length_244_cvg_2.6_tip_1_1  | 4  | dnaj homolog subfamily c member 3-like                                                                 | 81 | 1.17E-33 | 85.80%                                               | 0.106   | IPR019734 (SMART); PF13414 (PFAM); IPR011990 (G3DSA:1.25.40.GENE3D); IPR013026 (PROSITE_PROFILES); IPR019734 (PROSITE_PROFILES); IPR019734 (PROSITE_PROFILES); SSF48452 (SUPERFAMILY)                                                                                                                                                                                                                              |  |  |
| 175 | 157681_length_244_cvg_2.5_tip_1_4  | 4  | membrane metallo-endopeptidase-like 1 isoform x4                                                       | 81 | 1.22E-12 | 62.40%                                               | 0.102   | G3DSA:1.10.1380.10 (GENE3D); IPR008753 (PFAM); PTHR11733:SF111 (PANTHER); IPR000718 (PANTHER); SSF55486 (SUPERFAMILY)                                                                                                                                                                                                                                                                                              |  |  |

|     |                                     |      |                                                                                       |    |          |        |         |                                                                                                                                                                                                                                                                                                                                                       |
|-----|-------------------------------------|------|---------------------------------------------------------------------------------------|----|----------|--------|---------|-------------------------------------------------------------------------------------------------------------------------------------------------------------------------------------------------------------------------------------------------------------------------------------------------------------------------------------------------------|
| 176 | 157713_length_244_cvg_2.0_tip_1_2   | 4    | tyrosine-protein kinase src42a                                                        | 81 | 1.36E-11 | 59.60% | 0.205   | IPR003591 (SMART); IPR001611 (PFAM); G3DSA:3.80.10.10 (GENE3D); PTHR24373 (PANTHER); IPR001611 (PROSITE_PROFILES); IPR001611 (PROSITE_PROFILES); IPR001611 (PROSITE_PROFILES); SSF52058 (SUPERFAMILY)                                                                                                                                                 |
| 177 | 157865_length_244_cvg_2.9_tip_1_4   | 4    | endothelin-converting enzyme, putative                                                | 81 | 6.34E-06 | 62.00% | 0.104   | IPR008753 (PFAM); G3DSA:1.10.1380.10 (GENE3D); SSF55486 (SUPERFAMILY)                                                                                                                                                                                                                                                                                 |
| 183 | 159332_length_245_cvg_2.0_tip_1_2   | 6    | phospholipase b-like 2                                                                | 81 | 7.94E-31 | 84.20% | 0.123   | IPR007000 (PFAM); PTHR12370:SF3 (PANTHER); IPR007000 (PANTHER)                                                                                                                                                                                                                                                                                        |
| 178 | 157985_length_244_cvg_119.9_tip_0_0 | 5053 | kazal-type protease inhibitor                                                         | 82 | 3.46E-12 | 56.00% | 0.112   | IPR002350 (SMART); G3DSA:3.30.60.30 (GENE3D); G3DSA:3.30.60.30 (GENE3D); IPR002350 (PFAM); IPR002350 (PFAM); IPR002350 (PROSITE_PROFILES); IPR002350 (PROSITE_PROFILES); SSF100895 (SUPERFAMILY); SSF100895 (SUPERFAMILY)                                                                                                                             |
| 179 | 158298_length_244_cvg_2.0_tip_1_0   | 5    | sortilin-related receptor-like                                                        | 82 | 2.15E-28 | 81.60% | 0.132   | G3DSA:2.130.10.140 (GENE3D); PTHR12106:SF7 (PANTHER); PTHR12106 (PANTHER); SSF110296 (SUPERFAMILY)                                                                                                                                                                                                                                                    |
| 180 | 158366_length_245_cvg_2.0_tip_1_3   | 4    | c-type lectin ctl- partial                                                            | 82 | 7.62E-07 | 55.70% | 0.894 Y | IPR016186 (G3DSA:3.10.100.GENE3D); NON_CYTOPLASMIC_DOMAIN (PHOBIUS); SIGNAL_PEPTIDE_N_REGION (PHOBIUS); SIGNAL_PEPTIDE (PHOBIUS); SIGNAL_PEPTIDE_H_REGION (PHOBIUS); SIGNAL_PEPTIDE_C_REGION (PHOBIUS); IPR001304 (PROSITE_PROFILES); SignalP-noTM (SIGNALP_EUK); IPR016187 (SUPERFAMILY)                                                             |
| 181 | 158552_length_245_cvg_3.0_tip_1_1   | 7    | parkinson disease 7 domain-containing protein 1                                       | 82 | 2.14E-17 | 82.80% | 0.101   | IPR029062 (G3DSA:3.40.50.GENE3D); IPR029062 (SUPERFAMILY)                                                                                                                                                                                                                                                                                             |
| 182 | 159262_length_245_cvg_2.0_tip_1_4   | 4    | core histone macro-                                                                   | 82 | 1.55E-34 | 86.20% | 0.107   | IPR002119 (PRINTS); IPR002119 (SMART); IPR009072 (G3DSA:1.10.20.GENE3D); IPR007125 (PFAM); PTHR23430 (PANTHER); PTHR23430:SF33 (PANTHER); IPR009072 (SUPERFAMILY)                                                                                                                                                                                     |
| 184 | 159406_length_245_cvg_2.0_tip_1_4   | 5    | thrombospondin type-1 domain-containing protein 4                                     | 82 | 3.18E-28 | 56.40% | 0.108   | IPR000884 (SMART); G3DSA:2.20.100.10 (GENE3D); IPR000884 (PFAM); PTHR13723 (PANTHER); IPR000884 (PROSITE_PROFILES); IPR000884 (SUPERFAMILY); IPR000884 (SUPERFAMILY)                                                                                                                                                                                  |
| 185 | 159576_length_245_cvg_2.0_tip_1_3   | 5    | trehalose 6-phosphate synthase 1a isoform                                             | 82 | 7.54E-36 | 91.30% | 0.097   | G3DSA:3.40.50.2000 (GENE3D); IPR001830 (PFAM); PTHR10788:SF6 (PANTHER); PTHR10788 (PANTHER); SSF53756 (SUPERFAMILY)                                                                                                                                                                                                                                   |
| 186 | 159872_length_246_cvg_2.0_tip_1_3   | 7    | vitellogenin partial                                                                  | 82 | 1.08E-17 | 58.50% | 0.101   | no IPS match                                                                                                                                                                                                                                                                                                                                          |
| 189 | 161756_length_247_cvg_3.0_tip_1_1   | 7    | tyrosine-protein phosphatase                                                          | 82 | 6.19E-36 | 84.80% | 0.132   | IPR000242 (PFAM); IPR029021 (G3DSA:3.90.190.GENE3D); PTHR19134 (PANTHER); IPR000242 (PROSITE_PROFILES); IPR029021 (SUPERFAMILY)                                                                                                                                                                                                                       |
| 190 | 162168_length_247_cvg_63.0_tip_0_4  | 4625 | trypsin 3                                                                             | 82 | 1.52E-29 | 77.80% | 0.114   | IPR001254 (PFAM); G3DSA:2.40.10.10 (GENE3D); PTHR24256 (PANTHER); IPR018114 (PROSITE_PATTERNS); IPR001254 (PROSITE_PROFILES); IPR009003 (SUPERFAMILY)                                                                                                                                                                                                 |
| 193 | 163066_length_248_cvg_4.0_tip_1_5   | 9    | probable carboxypeptidase pm20d1                                                      | 82 | 4.56E-20 | 66.70% | 0.138   | IPR011650 (G3DSA:3.30.70.GENE3D); IPR011650 (PFAM); PTHR11014 (PANTHER); PTHR11014:SF66 (PANTHER); TMhelix (TMHMM)                                                                                                                                                                                                                                    |
| 194 | 163226_length_248_cvg_2.0_tip_1_5   | 3    | agap003656-pa-like protein                                                            | 82 | 6.32E-30 | 81.80% | 0.111   | IPR002172 (PRINTS); IPR002172 (SMART); IPR002172 (G3DSA:4.10.400.GENE3D); IPR002172 (G3DSA:4.10.400.GENE3D); IPR002172 (PFAM); PTHR10529 (PANTHER); IPR023415 (PROSITE_PATTERNS); IPR023415 (PROSITE_PATTERNS); IPR002172 (PROSITE_PROFILES); IPR002172 (PROSITE_PROFILES); IPR002172 (SUPERFAMILY); IPR002172 (SUPERFAMILY); IPR002172 (SUPERFAMILY) |
| 187 | 161218_length_247_cvg_2.0_tip_1_3   | 5    | achain 3ank: a designed ankyrin repeat protein with three identical consensus repeats | 83 | 6.61E-13 | 65.60% | 0.112   | IPR002110 (SMART); IPR020683 (G3DSA:1.25.40.GENE3D); IPR020683 (PFAM); PTHR24193 (PANTHER); IPR002110 (PROSITE_PROFILES); IPR002110 (PROSITE_PROFILES); IPR020683 (PROSITE_PROFILES); IPR020683 (SUPERFAMILY)                                                                                                                                         |
| 188 | 161490_length_247_cvg_2.0_tip_1_3   | 4    | peptidyl-prolyl cis-trans isomerase h                                                 | 83 | 6.37E-45 | 95.00% | 0.105   | IPR002130 (PRINTS); IPR029000 (G3DSA:2.40.100.GENE3D); IPR002130 (PFAM); IPR024936 (PANTHER); PTHR11071:SF58 (PANTHER); IPR002130 (PROSITE_PROFILES); IPR029000 (SUPERFAMILY)                                                                                                                                                                         |
| 191 | 162352_length_248_cvg_2.0_tip_1_0   | 5    | hypothetical protein Y032_0312g2164                                                   | 83 | 6.13E-11 | 63.10% | 0.106   | no IPS match                                                                                                                                                                                                                                                                                                                                          |
| 192 | 162710_length_248_cvg_2.0_tip_1_0   | 4    | adp-dependent glucokinase-like                                                        | 83 | 6.39E-24 | 73.30% | 0.107   | IPR007666 (PFAM); IPR029056 (G3DSA:3.40.1190.GENE3D); IPR007666 (PANTHER); PTHR21208:SF1 (PANTHER); IPR007666 (PROSITE_PROFILES); IPR029056 (SUPERFAMILY)                                                                                                                                                                                             |
| 195 | 163295_length_248_cvg_2.4_tip_1_1   | 5    | insulin-like growth factor-binding protein complex acid labile chain                  | 83 | 3.96E-11 | 61.50% | 0.139   | PR00019 (PRINTS); IPR003591 (SMART); G3DSA:3.80.10.10 (GENE3D); IPR001611 (PFAM); PTHR24365 (PANTHER); IPR001611 (PROSITE_PROFILES); IPR001611 (PROSITE_PROFILES); IPR001611 (PROSITE_PROFILES); SSF52058 (SUPERFAMILY)                                                                                                                               |
| 196 | 163613_length_249_cvg_2.0_tip_1_1   | 6    | carboxypeptidase d                                                                    | 83 | 4.14E-18 | 68.30% | 0.108   | PF13620 (PFAM); IPR014766 (G3DSA:2.60.40.GENE3D); PTHR11532 (PANTHER); IPR027062 (PTHR11532:PANTHER); IPR008969 (SUPERFAMILY)                                                                                                                                                                                                                         |
| 197 | 163879_length_249_cvg_2.0_tip_1_1   | 4    | brevican core protein                                                                 | 83 | 1.15E-11 | 52.00% | 0.125   | IPR016186 (G3DSA:3.10.100.GENE3D); IPR001304 (PFAM); PTHR22802 (PANTHER); IPR001304 (PROSITE_PROFILES); IPR016187 (SUPERFAMILY)                                                                                                                                                                                                                       |
| 198 | 164509_length_249_cvg_2.0_tip_1_1   | 6    | zinc finger protein 420-like                                                          | 83 | 3.28E-14 | 64.60% | 0.1     | IPR015880 (SMART); PF13465 (PFAM); IPR013087 (G3DSA:3.30.160.GENE3D); IPR013087 (G3DSA:3.30.160.GENE3D); PTHR24409 (PANTHER); PTHR24409:SF14 (PANTHER); IPR007087 (PROSITE_PATTERNS); IPR007087 (PROSITE_PATTERNS); IPR007087 (PROSITE_PROFILES); IPR007087 (PROSITE_PROFILES); SSF57667 (SUPERFAMILY)                                                |



|     |                                   |   |                                                          |    |          |        |         |                                                                                                                                                                                                                                                                                                                                                                   |
|-----|-----------------------------------|---|----------------------------------------------------------|----|----------|--------|---------|-------------------------------------------------------------------------------------------------------------------------------------------------------------------------------------------------------------------------------------------------------------------------------------------------------------------------------------------------------------------|
| 199 | 164761_length_249_cvg_2.0_tip_1_0 | 2 | follistatin-related protein 5                            | 83 | 1.14E-40 | 87.80% | 0.098   | IPR011992 (G3DSA:1.10.238.GENE3D); PTHR10913:SF14 (PANTHER); PTHR10913 (PANTHER); IPR018247 (PROSITE_PATTERNS); SSF47473 (SUPERFAMILY)                                                                                                                                                                                                                            |
| 200 | 165005_length_250_cvg_4.5_tip_1_2 | 6 | glucose dehydrogenase                                    | 83 | 2.13E-16 | 65.70% | 0.101   | IPR007867 (PFAM); G3DSA:3.30.560.10 (GENE3D); PTHR11552 (PANTHER); PTHR11552:SF77 (PANTHER); SSF54373 (SUPERFAMILY)                                                                                                                                                                                                                                               |
| 201 | 165059_length_250_cvg_2.0_tip_1_4 | 4 | nucleolar protein partial                                | 83 | 6.52E-31 | 80.30% | 0.113   | PTHR10894 (PANTHER)                                                                                                                                                                                                                                                                                                                                               |
| 202 | 165317_length_250_cvg_3.0_tip_1_5 | 6 | leucine-rich repeats containing                          | 83 | 9.13E-19 | 62.70% | 0.112   | IPR001611 (PFAM); IPR001611 (PFAM); G3DSA:3.80.10.10 (GENE3D); PTHR24365 (PANTHER); IPR001611 (PROSITE_PROFILES); IPR001611 (PROSITE_PROFILES); SSF52058 (SUPERFAMILY)                                                                                                                                                                                            |
| 203 | 165351_length_250_cvg_2.0_tip_1_5 | 7 | neutral endopeptidase                                    | 83 | 1.26E-24 | 72.50% | 0.113   | IPR018497 (PRINTS); IPR024079 (G3DSA:3.40.390.GENE3D); IPR018497 (PFAM); PTHR11733:SF113 (PANTHER); IPR000718 (PANTHER); NON_CYTOPLASMIC_DOMAIN (PHOBIUS); CYTOPLASMIC_DOMAIN (PHOBIUS); TRANSMEMBRANE (PHOBIUS); SSF55486 (SUPERFAMILY); TMhelix (TMHMM)                                                                                                         |
| 205 | 166061_length_250_cvg_3.0_tip_1_4 | 7 | isoform cra_c                                            | 83 | 1.91E-10 | 66.80% | 0.136   | IPR001254 (PFAM); G3DSA:2.40.10.10 (GENE3D); PTHR24264 (PANTHER); PTHR24264:SF9 (PANTHER); IPR009003 (SUPERFAMILY)                                                                                                                                                                                                                                                |
| 206 | 166185_length_250_cvg_2.0_tip_1_2 | 7 | low-density lipoprotein                                  | 83 | 1.21E-34 | 84.60% | 0.13    | IPR002172 (PRINTS); IPR002172 (SMART); IPR002172 (PFAM); IPR002172 (G3DSA:4.10.400.GENE3D); PTHR10529 (PANTHER); PTHR10529:SF204 (PANTHER); IPR023415 (PROSITE_PATTERNS); IPR002172 (PROSITE_PROFILES); IPR002172 (PROSITE_PROFILES); IPR002172 (SUPERFAMILY); IPR002172 (SUPERFAMILY)                                                                            |
| 204 | 166041_length_250_cvg_2.7_tip_1_0 | 7 | heat shock cognate 71 kda                                | 84 | 5.72E-30 | 84.10% | 0.178   | IPR013126 (PRINTS); IPR013126 (PFAM); G3DSA:3.30.30.30 (GENE3D); G3DSA:3.30.420.40 (GENE3D); PTHR19375 (PANTHER); IPR018181 (PROSITE_PATTERNS); SSF53067 (SUPERFAMILY)                                                                                                                                                                                            |
| 207 | 166767_length_251_cvg_2.0_tip_1_1 | 5 | protein lap1-like                                        | 84 | 9.95E-25 | 78.30% | 0.097   | IPR001611 (PFAM); G3DSA:3.80.10.10 (GENE3D); IPR025875 (PFAM); PTHR23155 (PANTHER); PTHR23155:SF466 (PANTHER); IPR001611 (PROSITE_PROFILES); IPR001611 (PROSITE_PROFILES); IPR001611 (PROSITE_PROFILES); IPR001611 (PROSITE_PROFILES); SSF52075 (SUPERFAMILY)                                                                                                     |
| 208 | 166999_length_251_cvg_2.0_tip_1_4 | 5 | agrn partial                                             | 84 | 5.06E-13 | 62.70% | 0.113   | IPR001791 (PFAM); IPR013320 (G3DSA:2.60.120.GENE3D); IPR001791 (PROSITE_PROFILES); IPR013320 (SUPERFAMILY)                                                                                                                                                                                                                                                        |
| 209 | 167047_length_251_cvg_3.0_tip_1_0 | 6 | #NAME?                                                   | 84 | 2.59E-23 | 83.30% | 0.418 Y | IPR001623 (PRINTS); IPR001623 (SMART); IPR001623 (PFAM); IPR001623 (G3DSA:1.10.287.GENE3D); PTHR24077 (PANTHER); IPR001623 (PROSITE_PROFILES); IPR001623 (SUPERFAMILY)                                                                                                                                                                                            |
| 210 | 167061_length_251_cvg_3.0_tip_1_4 | 8 | mam and ldl-receptor class a domain-containing protein 1 | 84 | 1.97E-13 | 57.20% | 0.102   | IPR002172 (G3DSA:4.10.400.GENE3D); IPR000998 (PFAM); IPR000998 (PROSITE_PROFILES); IPR013320 (SUPERFAMILY); IPR002172 (SUPERFAMILY)                                                                                                                                                                                                                               |
| 211 | 167177_length_251_cvg_3.0_tip_1_4 | 7 | zinc finger protein rotund isoform x1                    | 84 | 2.75E-48 | 98.00% | 0.106   | IPR015880 (SMART); IPR013087 (G3DSA:3.30.160.GENE3D); IPR013087 (G3DSA:3.30.160.GENE3D); PF13465 (PFAM); IPR016608 (PTHR11389:PANTHER); PTHR11389 (PANTHER); IPR007087 (PROSITE_PATTERNS); IPR007087 (PROSITE_PATTERNS); IPR007087 (PROSITE_PROFILES); IPR007087 (PROSITE_PROFILES); IPR007087 (PROSITE_PROFILES); SSF57667 (SUPERFAMILY); SSF57667 (SUPERFAMILY) |
| 212 | 167645_length_251_cvg_2.0_tip_1_4 | 7 | mam and ldl-receptor class a domain-containing protein 1 | 84 | 2.54E-13 | 62.70% | 0.405 Y | IPR000998 (PFAM); IPR002172 (PFAM); IPR002172 (G3DSA:4.10.400.GENE3D); PTHR23282 (PANTHER); PTHR23282:SF75 (PANTHER); IPR000998 (PROSITE_PROFILES); IPR002172 (PROSITE_PROFILES); IPR013320 (SUPERFAMILY); IPR002172 (SUPERFAMILY)                                                                                                                                |
| 213 | 167831_length_252_cvg_2.0_tip_1_5 | 4 | laminin subunit alpha                                    | 84 | 1.19E-35 | 88.60% | 0.098   | IPR008211 (SMART); IPR008211 (PFAM); PTHR10574:SF39 (PANTHER); PTHR10574 (PANTHER); IPR008211 (PROSITE_PROFILES)                                                                                                                                                                                                                                                  |
| 214 | 167865_length_252_cvg_2.9_tip_1_5 | 7 | iron zinc purple acid phosphatase-like protein           | 84 | 7.51E-39 | 85.80% | 0.143   | IPR029052 (G3DSA:3.60.21.GENE3D); IPR004843 (PFAM); PTHR22953:SF9 (PANTHER); PTHR22953 (PANTHER); IPR029052 (SUPERFAMILY)                                                                                                                                                                                                                                         |
| 215 | 168045_length_252_cvg_3.0_tip_1_0 | 6 | protein disulfide-isomerase partial                      | 84 | 5.09E-27 | 72.60% | 0.107   | IPR013766 (PFAM); IPR012336 (G3DSA:3.40.30.GENE3D); PTHR18929 (PANTHER); PTHR18929:SF56 (PANTHER); IPR012336 (PROSITE_PROFILES); IPR012336 (SUPERFAMILY)                                                                                                                                                                                                          |
| 216 | 168115_length_252_cvg_3.0_tip_1_5 | 8 | zinc finger protein 429-like isoform x2                  | 84 | 1.05E-39 | 90.10% | 0.114   | IPR015880 (SMART); PF13465 (PFAM); PF13894 (PFAM); IPR013087 (G3DSA:3.30.160.GENE3D); IPR013087 (G3DSA:3.30.160.GENE3D); PTHR24409 (PANTHER); IPR007087 (PROSITE_PATTERNS); IPR007087 (PROSITE_PROFILES); IPR007087 (PROSITE_PROFILES); SSF57667 (SUPERFAMILY)                                                                                                    |
| 217 | 168207_length_252_cvg_2.0_tip_1_0 | 5 | serine protease like protein                             | 84 | 2.25E-22 | 67.40% | 0.259   | G3DSA:2.40.10.10 (GENE3D); IPR001254 (PFAM); PTHR24268:SF94 (PANTHER); PTHR24268 (PANTHER); IPR018114 (PROSITE_PATTERNS); IPR001254 (PROSITE_PROFILES); IPR009003 (SUPERFAMILY)                                                                                                                                                                                   |



|     |                                    |    |                                                                                       |    |          |        |         |                                                                                                                                                                                                                                                                                                                                                  |
|-----|------------------------------------|----|---------------------------------------------------------------------------------------|----|----------|--------|---------|--------------------------------------------------------------------------------------------------------------------------------------------------------------------------------------------------------------------------------------------------------------------------------------------------------------------------------------------------|
| 218 | 168229_length_252_cvg_3.0_tip_1_4  | 5  | muscle ankyrin repeat protein 3                                                       | 84 | 1.89E-09 | 57.80% | 0.117   | IPR002110 (PRINTS); IPR002110 (SMART); IPR020683 (PFAM); IPR020683 (G3DSA:1.25.40.GENE3D); PTHR24198 (PANTHER); IPR002110 (PROSITE_PROFILES); IPR002110 (PROSITE_PROFILES); IPR020683 (PROSITE_PROFILES); IPR020683 (SUPERFAMILY)                                                                                                                |
| 219 | 168643_length_252_cvg_2.4_tip_1_3  | 3  | phosphoglycerate kinase                                                               | 84 | 8.23E-17 | 60.60% | 0.103   | IPR001576 (PFAM); IPR015901 (G3DSA:3.40.50.GENE3D); IPR001576 (PANTHER); PTHR11406:SF6 (PANTHER); IPR001576 (SUPERFAMILY)                                                                                                                                                                                                                        |
| 220 | 168973_length_252_cvg_2.0_tip_1_2  | 6  | zinc c2h2 type domain-containing protein                                              | 84 | 6.40E-15 | 58.40% | 0.101   | IPR015880 (SMART); IPR013087 (G3DSA:3.30.160.GENE3D); IPR013087 (G3DSA:3.30.160.GENE3D); PF13465 (PFAM); PTHR24409 (PANTHER); PTHR24409:SF14 (PANTHER); IPR007087 (PROSITE_PATTERNS); IPR007087 (PROSITE_PATTERNS); IPR007087 (PROSITE_PROFILES); IPR007087 (PROSITE_PROFILES); SSF57667 (SUPERFAMILY); SSF57667 (SUPERFAMILY)                   |
| 222 | 169329_length_253_cvg_5.0_tip_1_4  | 6  | laminin subunit gamma-1                                                               | 84 | 8.37E-13 | 69.30% | 0.104   | no IPS match                                                                                                                                                                                                                                                                                                                                     |
| 224 | 169869_length_253_cvg_2.0_tip_1_2  | 5  | a disintegrin and metalloproteinase with thrombospondin motifs 12 isoform x1          | 84 | 2.16E-09 | 64.60% | 0.1     | IPR002870 (PFAM); PTHR11905 (PANTHER)                                                                                                                                                                                                                                                                                                            |
| 227 | 171233_length_254_cvg_2.0_tip_1_5  | 4  | zinc finger protein                                                                   | 84 | 2.98E-13 | 60.40% | 0.107   | IPR015880 (SMART); IPR007087 (PFAM); IPR013087 (G3DSA:3.30.160.GENE3D); IPR013087 (G3DSA:3.30.160.GENE3D); PF13894 (PFAM); PTHR24409:SF14 (PANTHER); PTHR24409 (PANTHER); IPR007087 (PROSITE_PATTERNS); IPR007087 (PROSITE_PATTERNS); IPR007087 (PROSITE_PROFILES); IPR007087 (PROSITE_PROFILES); SSF57667 (SUPERFAMILY); SSF57667 (SUPERFAMILY) |
| 229 | 171623_length_254_cvg_3.3_tip_1_2  | 10 | achain 3ank: a designed ankyrin repeat protein with three identical consensus repeats | 84 | 1.55E-14 | 62.30% | 0.132   | IPR002110 (SMART); IPR020683 (G3DSA:1.25.40.GENE3D); IPR020683 (PFAM); PTHR24193 (PANTHER); IPR020683 (PROSITE_PROFILES); IPR002110 (PROSITE_PROFILES); IPR002110 (PROSITE_PROFILES); IPR020683 (SUPERFAMILY)                                                                                                                                    |
| 221 | 169169_length_253_cvg_2.0_tip_1_0  | 6  | attractin-like protein 1 isoform x1                                                   | 85 | 1.82E-25 | 74.80% | 0.12    | IPR015915 (G3DSA:2.120.10.GENE3D); PF13418 (PFAM); PTHR10574 (PANTHER); PTHR10574:SF3 (PANTHER); SSF117281 (SUPERFAMILY)                                                                                                                                                                                                                         |
| 223 | 169741_length_253_cvg_3.0_tip_1_0  | 9  | collagen alpha-1 chain-like                                                           | 85 | 4.49E-10 | 62.30% | 0.104   | IPR008160 (PFAM); PTHR24023 (PANTHER); PTHR24023:SF372 (PANTHER)                                                                                                                                                                                                                                                                                 |
| 225 | 170415_length_253_cvg_2.0_tip_1_0  | 6  | aldehyde mitochondrial precursor                                                      | 85 | 2.82E-37 | 85.10% | 0.113   | IPR016163 (G3DSA:3.40.309.GENE3D); IPR015590 (PFAM); PTHR11699 (PANTHER); IPR015657 (PTHR11699:PANTHER); IPR016161 (SUPERFAMILY)                                                                                                                                                                                                                 |
| 226 | 170917_length_254_cvg_2.0_tip_1_3  | 2  | retinol dehydrogenase 14 isoform x2                                                   | 85 | 4.01E-27 | 80.70% | 0.106   | IPR002198 (PFAM); IPR016040 (G3DSA:3.40.50.GENE3D); PTHR24320 (PANTHER); CYTOPLASMIC_DOMAIN (PHOBIUS); TRANSMEMBRANE (PHOBIUS); NON_CYTOPLASMIC_DOMAIN (PHOBIUS); SSF51735 (SUPERFAMILY)                                                                                                                                                         |
| 228 | 171329_length_254_cvg_2.0_tip_1_3  | 3  | mucin-19 isoform x1                                                                   | 85 | 2.66E-08 | 59.80% | 0.169   | IPR001846 (PFAM); IPR001846 (PROSITE_PROFILES)                                                                                                                                                                                                                                                                                                   |
| 230 | 171683_length_254_cvg_3.9_tip_1_0  | 10 | c-type mannose receptor 2                                                             | 85 | 1.04E-06 | 62.57% | 0.111   | IPR001304 (PFAM); IPR016186 (G3DSA:3.10.100.GENE3D); IPR001304 (PROSITE_PROFILES); IPR016187 (SUPERFAMILY)                                                                                                                                                                                                                                       |
| 231 | 171863_length_255_cvg_2.0_tip_1_0  | 5  | signal cub and egf-like domain-containing protein partial                             | 85 | 1.30E-18 | 67.60% | 0.113   | IPR001881 (SMART); IPR000742 (SMART); PF14670 (PFAM); G3DSA:2.10.25.10 (GENE3D); G3DSA:2.10.25.10 (GENE3D); IPR026823 (PFAM); PTHR24034 (PANTHER); IPR013032 (PROSITE_PATTERNS); IPR018097 (PROSITE_PATTERNS); IPR000152 (PROSITE_PATTERNS); SSF57196 (SUPERFAMILY); SSF57196 (SUPERFAMILY)                                                      |
| 232 | 171907_length_255_cvg_2.0_tip_1_4  | 6  | group xv phospholipase a2                                                             | 85 | 3.53E-40 | 84.70% | 0.107   | IPR003386 (PFAM); PTHR11440 (PANTHER); PTHR11440:SF47 (PANTHER)                                                                                                                                                                                                                                                                                  |
| 233 | 171921_length_255_cvg_2.9_tip_1_1  | 9  | thyroglobulin type-1 repeat-containing domain protein                                 | 85 | 3.69E-19 | 65.70% | 0.108   | IPR000716 (SMART); IPR000716 (G3DSA:4.10.800.GENE3D); IPR000716 (PFAM); PTHR12352 (PANTHER); IPR000716 (PROSITE_PATTERNS); IPR000716 (PROSITE_PROFILES); IPR000716 (SUPERFAMILY)                                                                                                                                                                 |
| 234 | 171959_length_255_cvg_4.0_tip_1_5  | 14 | ---NA---                                                                              | 85 |          |        | 0.114   | IPR002172 (SMART); IPR002172 (PFAM); IPR002172 (G3DSA:4.10.400.GENE3D); IPR023415 (PROSITE_PATTERNS); IPR002172 (PROSITE_PROFILES); IPR002172 (SUPERFAMILY)                                                                                                                                                                                      |
| 235 | 172043_length_255_cvg_2.0_tip_1_1  | 6  | glucose dehydrogenase                                                                 | 85 | 2.45E-30 | 77.20% | 0.166   | G3DSA:3.50.50.60 (GENE3D); IPR000172 (PFAM); PTHR11552:SF77 (PANTHER); PTHR11552 (PANTHER); IPR000172 (PROSITE_PATTERNS); SSF51905 (SUPERFAMILY)                                                                                                                                                                                                 |
| 236 | 172289_length_255_cvg_17.0_tip_1_1 | 23 | 14-3-3 partial                                                                        | 85 | 3.61E-48 | 94.10% | 0.106   | IPR000308 (PRINTS); IPR023410 (SMART); G3DSA:1.20.190.20 (GENE3D); IPR023410 (PFAM); IPR000308 (PANTHER); IPR023410 (SUPERFAMILY)                                                                                                                                                                                                                |
| 237 | 172529_length_255_cvg_3.0_tip_1_2  | 9  | collagen alpha-1 chain isoform x1                                                     | 85 | 2.71E-07 | 63.70% | 0.751 Y | IPR008160 (PFAM); PTHR24023 (PANTHER); PTHR24023:SF372 (PANTHER); NON_CYTOPLASMIC_DOMAIN (PHOBIUS); SIGNAL_PEPTIDE_C_REGION (PHOBIUS); SIGNAL_PEPTIDE_H_REGION (PHOBIUS); SIGNAL_PEPTIDE_N_REGION (PHOBIUS); SIGNAL_PEPTIDE (PHOBIUS); SignalP-TM (SIGNALP_GRAM_POSITIVE); SignalP-noTM (SIGNALP_EUK)                                            |
| 238 | 172529_length_255_cvg_3.0_tip_1_5  | 9  | hypothetical protein                                                                  | 85 | 2.12E-06 | 51.00% | 0.103   | no IPS match                                                                                                                                                                                                                                                                                                                                     |
| 239 | 172807_length_255_cvg_3.0_tip_1_1  | 7  | ecotropic virus integration site 1 protein                                            | 85 | 5.33E-13 | 62.30% | 0.104   | IPR015880 (SMART); IPR013087 (G3DSA:3.30.160.GENE3D); PF13465 (PFAM); IPR013087 (G3DSA:3.30.160.GENE3D); IPR013087 (G3DSA:3.30.160.GENE3D); PTHR24409 (PANTHER); IPR007087 (PROSITE_PATTERNS); IPR007087 (PROSITE_PATTERNS); IPR007087 (PROSITE_PROFILES); IPR007087 (PROSITE_PROFILES); SSF57667 (SUPERFAMILY)                                  |

|     |                                    |    |                                                         |    |          |        |         |                                                                                                                                                                                                                                                                                                                                                                                                                         |
|-----|------------------------------------|----|---------------------------------------------------------|----|----------|--------|---------|-------------------------------------------------------------------------------------------------------------------------------------------------------------------------------------------------------------------------------------------------------------------------------------------------------------------------------------------------------------------------------------------------------------------------|
| 240 | 172905_length_255_cvg_2.0_tip_1_4  | 7  | laminin subunit gamma- partial                          | 85 | 1.10E-39 | 83.30% | 0.1     | IPR008211 (SMART); IPR008979 (G3DSA:2.60.120.GENE3D); IPR008211 (PFAM); PTHR10574:SF228 (PANTHER); PTHR10574 (PANTHER); IPR008211 (PROSITE_PROFILES)                                                                                                                                                                                                                                                                    |
| 241 | 173453_length_256_cvg_2.0_tip_1_4  | 4  | receptor-type tyrosine-protein phosphatase kappa        | 85 | 7.99E-39 | 82.60% | 0.113   | IPR000242 (PFAM); IPR029021 (G3DSA:3.90.190.GENE3D); PTHR19134 (PANTHER); PTHR19134:SF227 (PANTHER); IPR000242 (PROSITE_PROFILES); IPR029021 (SUPERFAMILY)                                                                                                                                                                                                                                                              |
| 242 | 174007_length_256_cvg_2.0_tip_1_1  | 8  | molting fluid carboxypeptidase a precursor              | 85 | 4.16E-29 | 74.20% | 0.11    | IPR000834 (PFAM); G3DSA:3.40.630.10 (GENE3D); PTHR11705 (PANTHER); SSF53187 (SUPERFAMILY)                                                                                                                                                                                                                                                                                                                               |
| 249 | 175291_length_257_cvg_2.0_tip_1_2  | 6  | notch-regulated ankyrin repeat-containing protein       | 85 | 1.75E-32 | 74.40% | 0.112   | IPR002110 (SMART); IPR020683 (G3DSA:1.25.40.GENE3D); PF13857 (PFAM); PTHR24203 (PANTHER); IPR002110 (PROSITE_PROFILES); IPR020683 (PROSITE_PROFILES); IPR020683 (SUPERFAMILY)                                                                                                                                                                                                                                           |
| 243 | 174331_length_256_cvg_4.6_tip_1_3  | 9  | protein sda1 homolog                                    | 86 | 4.88E-33 | 86.50% | 0.161   | IPR012977 (PFAM); IPR027312 (PTHR12730:PANTHER); PTHR12730 (PANTHER)                                                                                                                                                                                                                                                                                                                                                    |
| 244 | 174991_length_257_cvg_3.0_tip_1_1  | 7  | oocyte zinc finger protein 6                            | 86 | 4.26E-17 | 59.70% | 0.103   | IPR015880 (SMART); PF13465 (PFAM); PF13894 (PFAM); IPR013087 (G3DSA:3.30.160.GENE3D); IPR013087 (G3DSA:3.30.160.GENE3D); PTHR24409:SF14 (PANTHER); PTHR24409 (PANTHER); IPR007087 (PROSITE_PATTERNS); IPR007087 (PROSITE_PATTERNS); IPR007087 (PANTHER); PTHR19134:SF227 (PANTHER); IPR000242 (PROSITE_PROFILES); IPR029021 (SUPERFAMILY); IPR007087 (PROSITE_PROFILES); SSF57667 (SUPERFAMILY); SSF57667 (SUPERFAMILY) |
| 245 | 175015_length_257_cvg_2.0_tip_1_3  | 7  | zinc finger protein                                     | 86 | 8.16E-13 | 60.30% | 0.107   | IPR015880 (SMART); PF12874 (PFAM); PF13465 (PFAM); IPR013087 (G3DSA:3.30.160.GENE3D); IPR013087 (G3DSA:3.30.160.GENE3D); PTHR24409:SF14 (PANTHER); PTHR24409 (PANTHER); IPR007087 (PROSITE_PATTERNS); IPR007087 (PROSITE_PATTERNS); IPR007087 (PROSITE_PROFILES); IPR007087 (PROSITE_PROFILES); SSF57667 (SUPERFAMILY); SSF57667 (SUPERFAMILY)                                                                          |
| 246 | 175203_length_257_cvg_2.0_tip_1_4  | 3  | neural-cadherin- partial                                | 86 | 1.86E-38 | 90.10% | 0.103   | IPR000233 (PFAM); IPR027397 (G3DSA:4.10.900.GENE3D); PTHR24027:SF251 (PANTHER); PTHR24027 (PANTHER)                                                                                                                                                                                                                                                                                                                     |
| 247 | 175219_length_257_cvg_3.0_tip_1_3  | 7  | enolase                                                 | 86 | 1.32E-34 | 86.80% | 0.118   | IPR000941 (PRINTS); IPR020810 (PFAM); IPR029065 (G3DSA:3.20.20.GENE3D); IPR000941 (PANTHER); IPR029065 (SUPERFAMILY)                                                                                                                                                                                                                                                                                                    |
| 248 | 175233_length_257_cvg_2.0_tip_1_4  | 5  | zinc finger protein partial                             | 86 | 5.46E-18 | 61.70% | 0.1     | IPR015880 (SMART); IPR013087 (G3DSA:3.30.160.GENE3D); IPR007087 (PFAM); IPR013087 (G3DSA:3.30.160.GENE3D); PF13465 (PFAM); IPR013087 (G3DSA:3.30.160.GENE3D); PTHR24409 (PANTHER); IPR007087 (PROSITE_PATTERNS); IPR007087 (PROSITE_PATTERNS); IPR007087 (PROSITE_PROFILES); IPR007087 (PROSITE_PROFILES); IPR007087 (PROSITE_PROFILES); SSF57667 (SUPERFAMILY); SSF57667 (SUPERFAMILY)                                 |
| 250 | 175461_length_257_cvg_12.5_tip_1_0 | 19 | adp-ribosylation factor 2                               | 86 | 1.61E-13 | 99.70% | 0.133   | IPR006689 (PFAM); IPR027417 (G3DSA:3.40.50.GENE3D); PTHR11711:SF145 (PANTHER); PTHR11711 (PANTHER); TRANSMEMBRANE (PHOBIUS); NON_CYTOPLASMIC_DOMAIN (PHOBIUS); CYTOPLASMIC_DOMAIN (PHOBIUS); IPR027417 (SUPERFAMILY); TMhelix (TMHMM)                                                                                                                                                                                   |
| 251 | 175837_length_258_cvg_6.0_tip_1_4  | 15 | plexin domain-containing protein 2                      | 86 | 4.77E-30 | 81.00% | 0.118   | PTHR13055 (PANTHER); PTHR13055:SF12 (PANTHER)                                                                                                                                                                                                                                                                                                                                                                           |
| 252 | 175879_length_258_cvg_2.0_tip_1_4  | 3  | pro-epidermal growth factor                             | 86 | 1.29E-28 | 72.30% | 0.101   | IPR000742 (SMART); IPR001881 (SMART); IPR001881 (PFAM); G3DSA:2.10.25.10 (GENE3D); G3DSA:2.10.25.10 (GENE3D); PF14670 (PFAM); PTHR24034 (PANTHER); IPR000152 (PROSITE_PATTERNS); IPR000152 (PROSITE_PATTERNS); IPR018097 (PROSITE_PATTERNS); IPR018097 (PROSITE_PATTERNS); IPR013032 (PROSITE_PATTERNS); SSF57196 (SUPERFAMILY); SSF57196 (SUPERFAMILY)                                                                 |
| 253 | 176117_length_258_cvg_2.0_tip_1_5  | 4  | afadin isoform x3                                       | 86 | 3.03E-43 | 93.10% | 0.108   | IPR001478 (SMART); IPR001478 (PFAM); IPR001478 (G3DSA:2.30.42.GENE3D); PTHR10398 (PANTHER); IPR001478 (PROSITE_PROFILES); IPR001478 (SUPERFAMILY)                                                                                                                                                                                                                                                                       |
| 254 | 176407_length_258_cvg_3.0_tip_1_4  | 7  | ldlr2-a protein                                         | 86 | 1.07E-11 | 65.40% | 0.121   | IPR002172 (PRINTS); IPR002172 (SMART); IPR002172 (G3DSA:4.10.400.GENE3D); IPR002172 (PFAM); IPR002172 (G3DSA:4.10.400.GENE3D); PTHR10529 (PANTHER); IPR023415 (PROSITE_PATTERNS); IPR002172 (PROSITE_PROFILES); IPR002172 (SUPERFAMILY)                                                                                                                                                                                 |
| 255 | 176943_length_258_cvg_2.0_tip_1_3  | 4  | apical endosomal glyco                                  | 86 | 4.84E-21 | 66.60% | 0.113   | IPR000998 (PFAM); PTHR23282 (PANTHER); PTHR23282:SF75 (PANTHER); IPR000998 (PROSITE_PROFILES); IPR013320 (SUPERFAMILY)                                                                                                                                                                                                                                                                                                  |
| 256 | 177043_length_259_cvg_2.9_tip_1_2  | 8  | c-terminal tandem repeated domain in type 4 procollagen | 86 | 2.06E-13 | 67.90% | 0.109   | IPR008160 (PFAM); PTHR24023 (PANTHER); PTHR24023:SF379 (PANTHER)                                                                                                                                                                                                                                                                                                                                                        |
| 259 | 177133_length_259_cvg_8.0_tip_1_4  | 13 | serpin b12                                              | 86 | 4.36E-12 | 74.10% | 0.108   | IPR023796 (PFAM); G3DSA:2.30.39.10 (GENE3D); PTHR11461:SF52 (PANTHER); IPR000215 (PANTHER); IPR023795 (PROSITE_PATTERNS); IPR023796 (SUPERFAMILY)                                                                                                                                                                                                                                                                       |
| 261 | 177457_length_259_cvg_4.0_tip_1_1  | 9  | retinol dehydrogenase 11-like                           | 86 | 4.24E-17 | 61.80% | 0.501 Y | PTHR24320 (PANTHER); PTHR24320:SF59 (PANTHER); SignalIP-noTM (SIGNALP_EUK)                                                                                                                                                                                                                                                                                                                                              |

|     |                                    |     |                                                                                                                                                                            |    |          |        |         |                                                                                                                                                                                                                                                                                                                                    |
|-----|------------------------------------|-----|----------------------------------------------------------------------------------------------------------------------------------------------------------------------------|----|----------|--------|---------|------------------------------------------------------------------------------------------------------------------------------------------------------------------------------------------------------------------------------------------------------------------------------------------------------------------------------------|
| 262 | 177821_length_259_cvg_6.0_tip_1_5  | 16  | zinc finger partial                                                                                                                                                        | 86 | 9.23E-15 | 62.70% | 0.104   | IPR015880 (SMART); IPR013087 (G3DSA:3.30.160.GENE3D); PF13465 (PFAM); IPR013087 (G3DSA:3.30.160.GENE3D); PTHR24409 (PANTHER); PTHR24409:SF13 (PANTHER); IPR007087 (PROSITE_PATTERNS); IPR007087 (PROSITE_PROFILES); IPR007087 (PROSITE_PROFILES); SSF57667 (SUPERFAMILY); SSF57667 (SUPERFAMILY)                                   |
| 263 | 178049_length_259_cvg_2.0_tip_1_4  | 3   | sialate o- partial                                                                                                                                                         | 86 | 3.65E-19 | 67.80% | 0.12    | IPR005181 (PFAM); PTHR22901 (PANTHER); IPR013830 (SUPERFAMILY)                                                                                                                                                                                                                                                                     |
| 265 | 179285_length_260_cvg_3.0_tip_1_2  | 6   | tyrosine-protein kinase wsck                                                                                                                                               | 86 | 5.04E-24 | 62.20% | 0.157   | IPR001245 (PFAM); G3DSA:1.10.510.10 (GENE3D); PTHR24416 (PANTHER); PTHR24416:SF95 (PANTHER); IPR011009 (SUPERFAMILY)                                                                                                                                                                                                               |
| 257 | 177043_length_259_cvg_2.9_tip_1_3  | 8   | cell surface                                                                                                                                                               | 87 | 3.29E-12 | 56.60% | 0.124   | no IPS match                                                                                                                                                                                                                                                                                                                       |
| 258 | 177107_length_259_cvg_2.1_tip_1_0  | 5   | heat shock protein 70                                                                                                                                                      | 87 | 1.64E-23 | 66.70% | 0.104   | Coil (COILS); IPR013126 (PFAM); IPR029047 (G3DSA:2.60.34.GENE3D); PTHR19375 (PANTHER); PTHR19375:SF156 (PANTHER); IPR029047 (SUPERFAMILY)                                                                                                                                                                                          |
| 260 | 177377_length_259_cvg_9.3_tip_1_3  | 20  | hemagglutinin amebocyte aggregation factor-like                                                                                                                            | 87 | 4.08E-16 | 67.60% | 0.177   | PF14704 (PFAM); IPR026645 (PANTHER)                                                                                                                                                                                                                                                                                                |
| 264 | 179139_length_260_cvg_3.0_tip_1_4  | 8   | macrophage mannose receptor 1                                                                                                                                              | 87 | 2.55E-13 | 58.00% | 0.112   | IPR001304 (PFAM); IPR016186 (G3DSA:3.10.100.GENE3D); IPR016186 (G3DSA:3.10.100.GENE3D); PTHR22803 (PANTHER); IPR018378 (PROSITE_PATTERNS); IPR001304 (PROSITE_PROFILES); IPR001304 (PROSITE_PROFILES); IPR016187 (SUPERFAMILY); IPR016187 (SUPERFAMILY)                                                                            |
| 266 | 179607_length_261_cvg_62.2_tip_0_4 | 275 | angiopoietin-4 isoform x2                                                                                                                                                  | 87 | 2.10E-19 | 70.30% | 0.103   | IPR002181 (SMART); IPR014716 (G3DSA:3.90.215.GENE3D); IPR002181 (PFAM); PTHR19143 (PANTHER); IPR002181 (PROSITE_PROFILES); IPR002181 (SUPERFAMILY)                                                                                                                                                                                 |
| 267 | 179781_length_261_cvg_52.0_tip_1_3 | 107 | ---NA---                                                                                                                                                                   | 87 |          |        | 0.914 Y | IPR014044 (G3DSA:3.40.33.GENE3D); SIGNAL_PEPTIDE_C_REGION (PHOBIUS); SIGNAL_PEPTIDE_N_REGION (PHOBIUS); SIGNAL_PEPTIDE (PHOBIUS); SIGNAL_PEPTIDE_H_REGION (PHOBIUS); NON_CYTOPLASMIC_DOMAIN (PHOBIUS); SignalP-TM (SIGNALP_GRAM_POSITIVE); SignalP-noTM (SIGNALP_GRAM_NEGATIVE); SignalP-noTM (SIGNALP_EUK); TMhelix (TMHMM)       |
| 268 | 180769_length_262_cvg_2.0_tip_1_4  | 5   | PREDICTED: uncharacterized protein C4orf29 homolog isoform X5                                                                                                              | 87 | 6.29E-34 | 81.10% | 0.116   | IPR019149 (PFAM); PTHR13617 (PANTHER)                                                                                                                                                                                                                                                                                              |
| 269 | 180967_length_262_cvg_3.0_tip_1_2  | 7   | aquaporin                                                                                                                                                                  | 87 | 1.20E-27 | 71.90% | 0.211   | IPR000425 (PRINTS); IPR000425 (PFAM); IPR023271 (G3DSA:1.20.1080.GENE3D); IPR000425 (PANTHER); TRANSMEMBRANE (PHOBIUS); CYTOPLASMIC_DOMAIN (PHOBIUS); CYTOPLASMIC_DOMAIN (PHOBIUS); TRANSMEMBRANE (PHOBIUS); NON_CYTOPLASMIC_DOMAIN (PHOBIUS); IPR023271 (SUPERFAMILY); TMhelix (TMHMM); TMhelix (TMHMM)                           |
| 270 | 181025_length_262_cvg_2.0_tip_1_5  | 4   | hormone-sensitive lipase                                                                                                                                                   | 87 | 7.78E-33 | 75.60% | 0.207   | IPR013094 (PFAM); IPR029058 (G3DSA:3.40.50.GENE3D); PTHR23025 (PANTHER); PTHR23025:SF3 (PANTHER); IPR029058 (SUPERFAMILY)                                                                                                                                                                                                          |
| 271 | 181171_length_262_cvg_2.0_tip_1_5  | 6   | zinc finger protein 271 (zinc finger protein 7) (zinc finger protein znfphe133) (epstein-barr virus-induced zinc finger protein) (znf-eb) (ct-zfp48) (zinc finger protein) | 87 | 1.86E-22 | 69.70% | 0.1     | IPR015880 (SMART); IPR013087 (G3DSA:3.30.160.GENE3D); IPR013087 (G3DSA:3.30.160.GENE3D); PF13465 (PFAM); PTHR24409 (PANTHER); IPR007087 (PROSITE_PATTERNS); IPR007087 (PROSITE_PATTERNS); IPR007087 (PROSITE_PROFILES); IPR007087 (PROSITE_PROFILES); IPR007087 (PROSITE_PROFILES); SSF57667 (SUPERFAMILY); SSF57667 (SUPERFAMILY) |
| 272 | 181231_length_262_cvg_2.0_tip_1_5  | 4   | basement membrane-specific heparan sulfate proteoglycan core protein                                                                                                       | 87 | 2.02E-28 | 73.30% | 0.1     | G3DSA:2.10.25.10 (GENE3D); PTHR10574 (PANTHER); PTHR10574:SF252 (PANTHER)                                                                                                                                                                                                                                                          |
| 274 | 181721_length_262_cvg_2.0_tip_1_1  | 6   | extracellular serine threonine protein kinase fam20c isoform x1                                                                                                            | 87 | 9.00E-18 | 72.10% | 0.152   | PTHR12450:SF8 (PANTHER); IPR024869 (PANTHER)                                                                                                                                                                                                                                                                                       |
| 275 | 181775_length_263_cvg_4.0_tip_1_5  | 10  | millepora cytotoxin-1-like                                                                                                                                                 | 87 | 1.92E-07 | 65.14% | 0.102   | PF14704 (PFAM); IPR026645 (PANTHER)                                                                                                                                                                                                                                                                                                |
| 276 | 182183_length_263_cvg_2.0_tip_1_2  | 6   | krueppel-like factor 13                                                                                                                                                    | 87 | 1.70E-13 | 62.30% | 0.102   | IPR015880 (SMART); IPR013087 (G3DSA:3.30.160.GENE3D); IPR013087 (G3DSA:3.30.160.GENE3D); IPR007087 (PFAM); IPR013087 (G3DSA:3.30.160.GENE3D); PF13465 (PFAM); PTHR24409 (PANTHER); IPR007087 (PROSITE_PATTERNS); IPR007087 (PROSITE_PATTERNS); IPR007087 (PROSITE_PROFILES); IPR007087 (PROSITE_PROFILES); SSF57667 (SUPERFAMILY)  |
| 277 | 182245_length_263_cvg_2.0_tip_1_2  | 4   | zinc finger protein 254-like                                                                                                                                               | 87 | 6.90E-20 | 68.70% | 0.104   | IPR015880 (SMART); IPR013087 (G3DSA:3.30.160.GENE3D); PF13465 (PFAM); PTHR24409 (PANTHER); IPR007087 (PROSITE_PATTERNS); IPR007087 (PROSITE_PATTERNS); IPR007087 (PROSITE_PROFILES); IPR007087 (PROSITE_PROFILES); SSF57667 (SUPERFAMILY)                                                                                          |
| 278 | 182273_length_263_cvg_2.0_tip_1_2  | 5   | zinc c2h2 type domain-containing protein                                                                                                                                   | 87 | 1.08E-15 | 59.50% | 0.1     | IPR015880 (SMART); IPR007087 (PFAM); PF13465 (PFAM); IPR013087 (G3DSA:3.30.160.GENE3D); PTHR24409 (PANTHER); PTHR24409:SF14 (PANTHER); IPR007087 (PROSITE_PATTERNS); IPR007087 (PROSITE_PATTERNS); IPR007087 (PROSITE_PROFILES); IPR007087 (PROSITE_PROFILES); SSF57667 (SUPERFAMILY)                                              |
| 279 | 182317_length_263_cvg_2.0_tip_1_2  | 3   | mam and ldl-receptor class a domain-containing protein 2-like                                                                                                              | 87 | 9.52E-24 | 72.70% | 0.103   | IPR000998 (PFAM); PTHR23282 (PANTHER); IPR000998 (PROSITE_PROFILES); IPR013320 (SUPERFAMILY); TMhelix (TMHMM)                                                                                                                                                                                                                      |

|     |                                    |    |                                                         |    |          |        |         |                                                                                                                                                                                                                                                                                                                                                                |
|-----|------------------------------------|----|---------------------------------------------------------|----|----------|--------|---------|----------------------------------------------------------------------------------------------------------------------------------------------------------------------------------------------------------------------------------------------------------------------------------------------------------------------------------------------------------------|
| 273 | 181569_length_262_cvg_3.0_tip_1_0  | 7  | transferrin                                             | 88 | 4.55E-19 | 64.30% | 0.099   | IPR001156 (PRINTS); G3DSA:3.40.190.10 (GENE3D); IPR001156 (PFAM); PTHR11485 (PANTHER); IPR001156 (PROSITE_PROFILES); SSF53850 (SUPERFAMILY)                                                                                                                                                                                                                    |
| 280 | 182529_length_263_cvg_4.0_tip_1_3  | 8  | fras1-related extracellular matrix protein 1 isoform x1 | 88 | 5.24E-12 | 56.50% | 0.167   | IPR001304 (PFAM); IPR016186 (G3DSA:3.10.100.GENE3D); IPR001304 (PROSITE_PROFILES); IPR016187 (SUPERFAMILY)                                                                                                                                                                                                                                                     |
| 281 | 182805_length_264_cvg_25.4_tip_1_0 | 55 | aldose reductase                                        | 88 | 6.70E-27 | 85.40% | 0.364 Y | IPR023210 (PFAM); IPR023210 (G3DSA:3.20.20.GENE3D); PTHR11732:SF173 (PANTHER); IPR001395 (PANTHER); IPR018170 (PROSITE_PATTERNS); IPR023210 (SUPERFAMILY)                                                                                                                                                                                                      |
| 282 | 182807_length_264_cvg_3.9_tip_1_3  | 7  | endo-beta- -glucanase                                   | 88 | 1.96E-14 | 80.00% | 0.22    | IPR012341 (G3DSA:1.50.10.GENE3D); IPR001701 (PFAM); PTHR22298 (PANTHER); SignalP-TM (SIGNALP_GRAM_POSITIVE); IPR008928 (SUPERFAMILY)                                                                                                                                                                                                                           |
| 283 | 182895_length_264_cvg_2.0_tip_1_4  | 7  | serine protease nudel                                   | 88 | 1.07E-43 | 89.10% | 0.113   | G3DSA:2.40.10.10 (GENE3D); IPR001254 (PFAM); PTHR24265 (PANTHER); IPR001254 (PROSITE_PROFILES); IPR009003 (SUPERFAMILY)                                                                                                                                                                                                                                        |
| 284 | 182909_length_264_cvg_2.0_tip_1_0  | 5  | hemicentin-1 precursor                                  | 88 | 6.59E-29 | 73.80% | 0.142   | PR01705 (PRINTS); IPR000884 (SMART); G3DSA:2.20.100.10 (GENE3D); IPR000884 (PFAM); PTHR19897 (PANTHER); IPR000884 (PROSITE_PROFILES); IPR000884 (PROSITE_PROFILES); IPR000884 (SUPERFAMILY); IPR000884 (SUPERFAMILY)                                                                                                                                           |
| 285 | 183009_length_264_cvg_2.7_tip_1_5  | 6  | wilms tumor partial                                     | 88 | 1.63E-26 | 69.80% | 0.125   | IPR015880 (SMART); IPR013087 (G3DSA:3.30.160.GENE3D); IPR007087 (PFAM); IPR013087 (G3DSA:3.30.160.GENE3D); PF13465 (PFAM); IPR013087 (G3DSA:3.30.160.GENE3D); PTHR24409 (PANTHER); IPR007087 (PROSITE_PATTERNS); IPR007087 (PROSITE_PATTERNS); IPR007087 (PROSITE_PROFILES); IPR007087 (PROSITE_PROFILES); SSF57667 (SUPERFAMILY); SSF57667 (SUPERFAMILY)      |
| 286 | 183023_length_264_cvg_2.0_tip_1_0  | 7  | trehalase-like isoform x1                               | 88 | 6.01E-26 | 70.30% | 0.116   | IPR001661 (PFAM); IPR001661 (PANTHER); PTHR23403:SF1 (PANTHER); IPR018232 (PROSITE_PATTERNS); IPR008928 (SUPERFAMILY)                                                                                                                                                                                                                                          |
| 287 | 183287_length_264_cvg_2.8_tip_1_4  | 6  | zinc finger protein 431 isoform x2                      | 88 | 6.86E-18 | 68.50% | 0.146   | IPR015880 (SMART); IPR013087 (G3DSA:3.30.160.GENE3D); PF13465 (PFAM); PTHR24409:SF13 (PANTHER); PTHR24409 (PANTHER); IPR007087 (PROSITE_PATTERNS); IPR007087 (PROSITE_PATTERNS); IPR007087 (PROSITE_PROFILES); IPR007087 (PROSITE_PROFILES); IPR007087 (PROSITE_PROFILES); SSF57667 (SUPERFAMILY); SSF57667 (SUPERFAMILY)                                      |
| 288 | 183293_length_264_cvg_4.0_tip_1_5  | 12 | thioredoxin domain-containing protein 11                | 88 | 4.06E-22 | 63.10% | 0.111   | IPR012336 (G3DSA:3.40.30.GENE3D); IPR013766 (PFAM); PTHR18929 (PANTHER); PTHR18929:SF61 (PANTHER); IPR012336 (SUPERFAMILY); TMhelix (TMHMM)                                                                                                                                                                                                                    |
| 289 | 183395_length_264_cvg_9.8_tip_1_0  | 21 | alpha-esterase 47 isoform I                             | 88 | 2.91E-11 | 72.50% | 0.496 Y | IPR002018 (PFAM); IPR029058 (G3DSA:3.40.50.GENE3D); PTHR11559 (PANTHER); SIGNAL_PEPTIDE_H_REGION (PHOBIUS); SIGNAL_PEPTIDE_C_REGION (PHOBIUS); NON_CYTOPLASMIC_DOMAIN (PHOBIUS); SIGNAL_PEPTIDE_N_REGION (PHOBIUS); SIGNAL_PEPTIDE (PHOBIUS); SignalP-TM (SIGNALP_GRAM_NEGATIVE); SignalP-TM (SIGNALP_GRAM_POSITIVE); IPR029058 (SUPERFAMILY); TMhelix (TMHMM) |
| 292 | 184509_length_265_cvg_12.0_tip_1_2 | 33 | melanoma-associated antigen e1- partial                 | 88 | 6.88E-10 | 67.10% | 0.428 Y | SignalP-TM (SIGNALP_GRAM_POSITIVE)                                                                                                                                                                                                                                                                                                                             |
| 293 | 184667_length_265_cvg_4.0_tip_1_5  | 11 | ribonuclease oy-like                                    | 88 | 2.72E-18 | 61.10% | 0.112   | IPR001568 (PFAM); IPR001568 (G3DSA:3.90.730.GENE3D); IPR001568 (PANTHER); IPR001568 (SUPERFAMILY)                                                                                                                                                                                                                                                              |
| 295 | 185267_length_266_cvg_3.0_tip_1_5  | 4  | ring finger and spry domain-containing protein 1-like   | 88 | 4.92E-35 | 79.80% | 0.148   | IPR003877 (PFAM); PTHR13363 (PANTHER); IPR001870 (PROSITE_PROFILES); IPR013320 (SUPERFAMILY)                                                                                                                                                                                                                                                                   |
| 290 | 184341_length_265_cvg_2.0_tip_1_0  | 6  | hypothetical protein Phum_PHUM426340                    | 89 | 4.69E-20 | 67.10% | 0.133   | IPR003410 (PFAM); PTHR24273:SF29 (PANTHER); PTHR24273 (PANTHER); IPR003410 (PROSITE_PROFILES)                                                                                                                                                                                                                                                                  |
| 291 | 184497_length_265_cvg_3.8_tip_1_3  | 15 | urokinase-type plasminogen activator                    | 89 | 3.23E-06 | 82.30% | 0.148   | IPR001254 (PFAM); G3DSA:2.40.10.10 (GENE3D); IPR009003 (SUPERFAMILY)                                                                                                                                                                                                                                                                                           |
| 294 | 184747_length_265_cvg_5.0_tip_1_0  | 10 | nuclear transport                                       | 89 | 2.79E-21 | 86.80% | 0.121   | IPR002075 (PFAM); G3DSA:3.10.450.50 (GENE3D); PTHR12612 (PANTHER); IPR018222 (PROSITE_PROFILES); SSF54427 (SUPERFAMILY)                                                                                                                                                                                                                                        |
| 296 | 185457_length_266_cvg_2.0_tip_1_4  | 4  | nad h-hydrate epimerase-like                            | 89 | 2.80E-38 | 78.90% | 0.106   | IPR004443 (PFAM); IPR004443 (G3DSA:3.40.50.GENE3D); PTHR13232 (PANTHER); IPR004443 (PROSITE_PROFILES); IPR004443 (SUPERFAMILY)                                                                                                                                                                                                                                 |
| 297 | 185923_length_266_cvg_6.0_tip_1_3  | 12 | cd109 antigen-like isoform x1                           | 89 | 1.08E-35 | 77.70% | 0.108   | IPR002890 (PFAM); PTHR11412:SF84 (PANTHER); PTHR11412 (PANTHER)                                                                                                                                                                                                                                                                                                |
| 298 | 185997_length_267_cvg_3.0_tip_1_2  | 9  | heat shock protein                                      | 89 | 7.68E-42 | 91.50% | 0.112   | IPR029048 (G3DSA:1.20.1270.GENE3D); IPR029047 (G3DSA:2.60.34.GENE3D); IPR013126 (PFAM); PTHR19375 (PANTHER); IPR029047 (SUPERFAMILY)                                                                                                                                                                                                                           |
| 299 | 186277_length_267_cvg_2.0_tip_1_0  | 6  | slit-like partial                                       | 89 | 4.88E-19 | 65.50% | 0.247   | IPR003591 (SMART); G3DSA:3.80.10.10 (GENE3D); IPR001611 (PFAM); IPR001611 (PROSITE_PROFILES); IPR001611 (PROSITE_PROFILES); SSF52058 (SUPERFAMILY)                                                                                                                                                                                                             |
| 300 | 186389_length_267_cvg_2.0_tip_1_2  | 5  | receptor tyrosine phosphatase type r2a                  | 89 | 3.37E-30 | 79.90% | 0.134   | IPR003598 (SMART); IPR003599 (SMART); IPR013783 (G3DSA:2.60.40.GENE3D); IPR013098 (PFAM); PTHR19134 (PANTHER); PTHR19134:SF199 (PANTHER); IPR007110 (PROSITE_PROFILES); SSF48726 (SUPERFAMILY)                                                                                                                                                                 |
| 301 | 186531_length_267_cvg_2.0_tip_1_3  | 6  | transmembrane protease serine 12                        | 89 | 8.34E-19 | 75.60% | 0.148   | IPR001254 (PFAM); G3DSA:2.40.10.10 (GENE3D); PTHR24264:SF9 (PANTHER); PTHR24264 (PANTHER); IPR018114 (PROSITE_PATTERNS); IPR001254 (PROSITE_PROFILES); IPR009003 (SUPERFAMILY); TMhelix (TMHMM)                                                                                                                                                                |



|     |                                    |     |                                                            |    |          |        |         |                                                                                                                                                                                                                                                                                                                                                                                                                      |
|-----|------------------------------------|-----|------------------------------------------------------------|----|----------|--------|---------|----------------------------------------------------------------------------------------------------------------------------------------------------------------------------------------------------------------------------------------------------------------------------------------------------------------------------------------------------------------------------------------------------------------------|
| 302 | 186723_length_267_cvg_66.1_tip_1_3 | 225 | plasma alpha-l-fucosidase-like                             | 89 | 2.29E-26 | 77.60% | 0.731 Y | IPR000933 (PFAM); IPR013781 (G3DSA:3.20.20.GENE3D); IPR000933 (PANTHER); PTHR10030:SF26 (PANTHER); SIGNAL_PEPTIDE_C_REGION (PHOBIUS); SIGNAL_PEPTIDE (PHOBIUS); SIGNAL_PEPTIDE_H_REGION (PHOBIUS); TRANSMEMBRANE (PHOBIUS); NON_CYTOPLASMIC_DOMAIN (PHOBIUS); SIGNAL_PEPTIDE_N_REGION (PHOBIUS); CYTOPLASMIC_DOMAIN (PHOBIUS); SignalP-noTM (SIGNALP_EUK); IPR017853 (SUPERFAMILY); TMhelix (TMHMM); TMhelix (TMHMM) |
| 303 | 186757_length_267_cvg_2.0_tip_1_1  | 5   | short-chain dehydrogenase                                  | 89 | 1.76E-22 | 71.50% | 0.440 Y | IPR016040 (G3DSA:3.40.50.GENE3D); IPR002198 (PFAM); PTHR24322:SF308 (PANTHER); PTHR24322 (PANTHER); SSF51735 (SUPERFAMILY)                                                                                                                                                                                                                                                                                           |
| 304 | 186821_length_267_cvg_2.0_tip_1_5  | 4   | zinc finger protein                                        | 89 | 7.77E-17 | 59.00% | 0.102   | IPR015880 (SMART); PF13465 (PFAM); IPR013087 (G3DSA:3.30.160.GENE3D); IPR013087 (G3DSA:3.30.160.GENE3D); PTHR24409 (PANTHER); PTHR24409:SF14 (PANTHER); IPR007087 (PROSITE_PATTERNS); IPR007087 (PROSITE_PATTERNS); IPR007087 (PROSITE_PROFILES); IPR007087 (PROSITE_PROFILES); SSF57667 (SUPERFAMILY); SSF57667 (SUPERFAMILY)                                                                                       |
| 305 | 187119_length_268_cvg_2.0_tip_1_1  | 6   | spermatogenesis-associated protein 5                       | 89 | 3.98E-48 | 92.80% | 0.105   | IPR003959 (PFAM); IPR027417 (G3DSA:3.40.50.GENE3D); PTHR23077 (PANTHER); PTHR23077:SF27 (PANTHER); IPR027417 (SUPERFAMILY)                                                                                                                                                                                                                                                                                           |
| 306 | 187171_length_268_cvg_2.0_tip_1_5  | 5   | zinc finger protein                                        | 89 | 2.80E-15 | 58.20% | 0.109   | IPR015880 (SMART); IPR013087 (G3DSA:3.30.160.GENE3D); IPR013087 (G3DSA:3.30.160.GENE3D); PF13465 (PFAM); PTHR24409 (PANTHER); PTHR24409:SF14 (PANTHER); IPR007087 (PROSITE_PATTERNS); IPR007087 (PROSITE_PATTERNS); IPR007087 (PROSITE_PROFILES); IPR007087 (PROSITE_PROFILES); SSF57667 (SUPERFAMILY)                                                                                                               |
| 308 | 187339_length_268_cvg_3.0_tip_1_2  | 7   | c-terminal tandem repeated domain in type 4 procollagen    | 89 | 8.48E-10 | 63.20% | 0.098   | IPR008160 (PFAM); PTHR24023:SF379 (PANTHER); PTHR24023 (PANTHER)                                                                                                                                                                                                                                                                                                                                                     |
| 310 | 187415_length_268_cvg_2.0_tip_1_4  | 6   | wd repeat-containing protein 37-like                       | 89 | 3.26E-47 | 92.80% | 0.104   | IPR001680 (SMART); IPR015943 (G3DSA:2.130.10.GENE3D); IPR001680 (PFAM); PTHR19855 (PANTHER); PTHR19855:SF12 (PANTHER); IPR019775 (PROSITE_PATTERNS); IPR001680 (PROSITE_PROFILES); IPR001680 (PROSITE_PROFILES); IPR017986 (PROSITE_PROFILES); IPR017986 (PROSITE_PROFILES); IPR017986 (SUPERFAMILY)                                                                                                                 |
| 312 | 187625_length_268_cvg_2.0_tip_1_4  | 6   | ---NA---                                                   | 89 |          |        | 0.107   | no IPS match                                                                                                                                                                                                                                                                                                                                                                                                         |
| 313 | 187661_length_268_cvg_2.0_tip_1_5  | 3   | glucose dehydrogenase                                      | 89 | 3.27E-23 | 71.10% | 0.143   | G3DSA:3.50.50.60 (GENE3D); IPR000172 (PFAM); PTHR11552:SF77 (PANTHER); PTHR11552 (PANTHER); SSF51905 (SUPERFAMILY)                                                                                                                                                                                                                                                                                                   |
| 314 | 187993_length_269_cvg_3.2_tip_1_5  | 7   | zinc finger protein 235                                    | 89 | 5.31E-15 | 61.20% | 0.099   | IPR015880 (SMART); PF13894 (PFAM); PF13465 (PFAM); IPR013087 (G3DSA:3.30.160.GENE3D); IPR013087 (G3DSA:3.30.160.GENE3D); PTHR24409 (PANTHER); PTHR24409:SF14 (PANTHER); IPR007087 (PROSITE_PATTERNS); IPR007087 (PROSITE_PATTERNS); IPR007087 (PROSITE_PROFILES); IPR007087 (PROSITE_PROFILES); SSF57667 (SUPERFAMILY)                                                                                               |
| 316 | 188235_length_269_cvg_8.4_tip_1_2  | 23  | prolow-density lipoprotein receptor-related protein 1-like | 89 | 4.64E-08 | 64.00% | 0.359 Y | IPR002172 (SMART); IPR002172 (PFAM); IPR002172 (G3DSA:4.10.400.GENE3D); IPR023415 (PROSITE_PATTERNS); NON_CYTOPLASMIC_DOMAIN (PHOBIUS); CYTOPLASMIC_DOMAIN (PHOBIUS); TRANSMEMBRANE (PHOBIUS); IPR002172 (PROSITE_PROFILES); IPR002172 (SUPERFAMILY)                                                                                                                                                                 |
| 319 | 188575_length_269_cvg_2.0_tip_1_5  | 4   | dnaj homolog subfamily c member 30-like                    | 89 | 4.76E-21 | 73.30% | 0.113   | IPR001623 (PRINTS); IPR001623 (SMART); IPR001623 (PFAM); IPR001623 (G3DSA:1.10.287.GENE3D); PTHR24078 (PANTHER); PTHR24078:SF171 (PANTHER); IPR018253 (PROSITE_PATTERNS); IPR001623 (PROSITE_PROFILES); IPR001623 (SUPERFAMILY)                                                                                                                                                                                      |
| 307 | 187283_length_268_cvg_2.0_tip_1_0  | 6   | er degradation-enhancing alpha-mannosidase-like 1          | 90 | 7.88E-40 | 84.40% | 0.105   | IPR001382 (PFAM); IPR001382 (G3DSA:1.50.10.GENE3D); IPR001382 (PANTHER); PTHR11742:SF25 (PANTHER); IPR001382 (SUPERFAMILY)                                                                                                                                                                                                                                                                                           |
| 309 | 187339_length_268_cvg_3.0_tip_1_3  | 7   | hypothetical protein, partial                              | 90 | 1.75E-09 | 48.80% | 0.119   | no IPS match                                                                                                                                                                                                                                                                                                                                                                                                         |
| 311 | 187461_length_268_cvg_2.0_tip_1_3  | 6   | leucine-rich repeat-containing protein 58                  | 90 | 5.52E-10 | 60.40% | 0.103   | G3DSA:3.80.10.10 (GENE3D); IPR001611 (PFAM); IPR001611 (PROSITE_PROFILES); IPR001611 (PROSITE_PROFILES); IPR001611 (PROSITE_PROFILES); SSF52075 (SUPERFAMILY)                                                                                                                                                                                                                                                        |
| 315 | 188197_length_269_cvg_4.0_tip_1_1  | 12  | proprotein convertase subtilisin kexin type                | 90 | 5.34E-30 | 79.00% | 0.106   | IPR002884 (PFAM); IPR008979 (G3DSA:2.60.120.GENE3D); PTHR10795:SF71 (PANTHER); IPR015500 (PANTHER); IPR008979 (SUPERFAMILY)                                                                                                                                                                                                                                                                                          |
| 317 | 188275_length_269_cvg_2.0_tip_1_4  | 7   | convoluted-like protein                                    | 90 | 3.52E-15 | 66.30% | 0.101   | G3DSA:3.80.10.10 (GENE3D); IPR001611 (PFAM); PTHR24365 (PANTHER); PTHR24365:SF83 (PANTHER); SSF52058 (SUPERFAMILY)                                                                                                                                                                                                                                                                                                   |
| 318 | 188403_length_269_cvg_4.3_tip_1_3  | 9   | immunoglobulin i-set domain-containing protein             | 90 | 1.14E-20 | 65.90% | 0.113   | IPR003598 (SMART); IPR013783 (G3DSA:2.60.40.GENE3D); IPR013098 (PFAM); PTHR10489 (PANTHER); IPR007110 (PROSITE_PROFILES); SSF48726 (SUPERFAMILY)                                                                                                                                                                                                                                                                     |
| 320 | 188879_length_269_cvg_3.0_tip_1_3  | 14  | coagulation factor v                                       | 90 | 2.97E-09 | 64.90% | 0.113   | no IPS match                                                                                                                                                                                                                                                                                                                                                                                                         |
| 321 | 189091_length_270_cvg_3.0_tip_1_5  | 10  | dappu_318553-like protein                                  | 90 | 1.55E-22 | 68.00% | 0.127   | IPR019791 (PRINTS); IPR019791 (PFAM); IPR019791 (G3DSA:1.10.640.GENE3D); PTHR11475 (PANTHER); IPR019791 (PROSITE_PROFILES); IPR010255 (SUPERFAMILY)                                                                                                                                                                                                                                                                  |
| 322 | 189153_length_270_cvg_4.5_tip_1_2  | 14  | collagen alpha-1 chain                                     | 90 | 2.56E-10 | 57.80% | 0.099   | IPR008160 (PFAM); PTHR24023 (PANTHER); PTHR24023:SF379 (PANTHER)                                                                                                                                                                                                                                                                                                                                                     |



|     |                                   |    |                                                            |    |          |        |       |                                                                                                                                                                                                                                                                                                                                                                                         |
|-----|-----------------------------------|----|------------------------------------------------------------|----|----------|--------|-------|-----------------------------------------------------------------------------------------------------------------------------------------------------------------------------------------------------------------------------------------------------------------------------------------------------------------------------------------------------------------------------------------|
| 323 | 189199_length_270_cvg_5.0_tip_1_5 | 13 | krueppel-like factor 13                                    | 90 | 1.65E-45 | 85.70% | 0.099 | IPR015880 (SMART); IPR013087 (G3DSA:3.30.160.GENE3D); PF13465 (PFAM); IPR013087 (G3DSA:3.30.160.GENE3D); PTHR23223 (PANTHER); IPR007087 (PROSITE_PATTERNS); IPR007087 (PROSITE_PATTERNS); IPR007087 (PROSITE_PROFILES); IPR007087 (PROSITE_PROFILES); IPR007087 (PROSITE_PROFILES); SSF57667 (SUPERFAMILY)                                                                              |
| 324 | 189217_length_270_cvg_2.0_tip_1_2 | 6  | abl interactor 2 isoform x1                                | 90 | 5.75E-40 | 85.60% | 0.119 | IPR001452 (PRINTS); IPR001452 (SMART); G3DSA:2.30.30.40 (GENE3D); IPR001452 (PFAM); IPR028457 (PANTHER); IPR001452 (PROSITE_PROFILES); IPR001452 (SUPERFAMILY)                                                                                                                                                                                                                          |
| 325 | 189585_length_270_cvg_4.0_tip_1_1 | 14 | transforming growth factor-beta-induced protein ig-h3-like | 90 | 5.57E-30 | 68.20% | 0.102 | IPR000782 (PFAM); IPR000782 (G3DSA:2.30.180.GENE3D); PTHR10900:SF73 (PANTHER); PTHR10900 (PANTHER); IPR000782 (PROSITE_PROFILES); IPR000782 (SUPERFAMILY)                                                                                                                                                                                                                               |
| 326 | 189631_length_270_cvg_3.0_tip_1_5 | 6  | cyclin-dependent kinase 2-like                             | 90 | 5.04E-54 | 95.90% | 0.201 | IPR002290 (SMART); IPR000719 (PFAM); G3DSA:1.10.510.10 (GENE3D); PTHR24056 (PANTHER); PTHR24056:SF168 (PANTHER); IPR008271 (PROSITE_PATTERNS); IPR000719 (PROSITE_PROFILES); IPR011009 (SUPERFAMILY)                                                                                                                                                                                    |
| 327 | 189721_length_270_cvg_4.0_tip_1_2 | 12 | alpha-2-macroglobulin-like isoform x1                      | 90 | 2.61E-14 | 60.20% | 0.105 | IPR015880 (SMART); IPR013087 (G3DSA:3.30.160.GENE3D); IPR013087 (G3DSA:3.30.160.GENE3D); PF13465 (PFAM); IPR013087 (G3DSA:3.30.160.GENE3D); IPR007087 (PFAM); PTHR24409 (PANTHER); IPR007087 (PROSITE_PATTERNS); IPR007087 (PROSITE_PATTERNS); IPR007087 (PROSITE_PROFILES); IPR007087 (PROSITE_PROFILES); IPR007087 (PROSITE_PROFILES); SSF57667 (SUPERFAMILY); SSF57667 (SUPERFAMILY) |
| 328 | 189949_length_271_cvg_4.0_tip_1_2 | 12 | titin isoform x1                                           | 90 | 2.23E-32 | 77.50% | 0.106 | IPR003599 (SMART); IPR013098 (PFAM); IPR013783 (G3DSA:2.60.40.GENE3D); PTHR19897:SF149 (PANTHER); PTHR19897 (PANTHER); IPR007110 (PROSITE_PROFILES); SSF48726 (SUPERFAMILY)                                                                                                                                                                                                             |
| 331 | 190273_length_271_cvg_2.0_tip_1_5 | 5  | aldehyde dehydrogenase family 16 member a1-like            | 90 | 2.25E-42 | 93.20% | 0.099 | IPR016163 (G3DSA:3.40.309.GENE3D); IPR015590 (PFAM); IPR016162 (G3DSA:3.40.605.GENE3D); PTHR11699:SF98 (PANTHER); PTHR11699 (PANTHER); IPR029510 (PROSITE_PATTERNS); IPR016161 (SUPERFAMILY)                                                                                                                                                                                            |
| 332 | 190347_length_271_cvg_2.0_tip_1_1 | 8  | clipd6 protein                                             | 90 | 8.41E-12 | 58.00% | 0.129 | G3DSA:2.40.10.10 (GENE3D); IPR001254 (PFAM); PTHR24265:SF76 (PANTHER); PTHR24265 (PANTHER); IPR001254 (PROSITE_PROFILES); IPR009003 (SUPERFAMILY)                                                                                                                                                                                                                                       |
| 333 | 190471_length_271_cvg_2.0_tip_1_2 | 3  | keratin-associated protein 5-9-like                        | 90 | 2.23E-07 | 56.43% | 0.322 | no IPS match                                                                                                                                                                                                                                                                                                                                                                            |
| 334 | 190477_length_271_cvg_4.0_tip_1_2 | 9  | heat shock protein 70                                      | 90 | 1.52E-19 | 67.60% | 0.103 | G3DSA:3.30.420.40 (GENE3D); IPR013126 (PFAM); PTHR19375 (PANTHER); SSF53067 (SUPERFAMILY)                                                                                                                                                                                                                                                                                               |
| 335 | 190497_length_271_cvg_6.0_tip_1_2 | 7  | striatin- partial                                          | 90 | 5.48E-54 | 97.30% | 0.114 | IPR001680 (SMART); IPR001680 (PFAM); IPR015943 (G3DSA:2.130.10.GENE3D); PTHR15653 (PANTHER); IPR019775 (PROSITE_PATTERNS); IPR017986 (PROSITE_PROFILES); IPR001680 (PROSITE_PROFILES); IPR017986 (SUPERFAMILY)                                                                                                                                                                          |
| 338 | 191023_length_272_cvg_2.0_tip_1_2 | 6  | zinc finger protein 235                                    | 90 | 3.10E-13 | 57.20% | 0.1   | IPR015880 (SMART); PF13465 (PFAM); IPR013087 (G3DSA:3.30.160.GENE3D); IPR013087 (G3DSA:3.30.160.GENE3D); PTHR24409 (PANTHER); PTHR24409:SF14 (PANTHER); IPR007087 (PROSITE_PATTERNS); IPR007087 (PROSITE_PROFILES); IPR007087 (PROSITE_PROFILES); IPR002219 (PROSITE_PROFILES); IPR007087 (PROSITE_PROFILES); SSF57667 (SUPERFAMILY); SSF57667 (SUPERFAMILY)                            |
| 341 | 191333_length_272_cvg_4.0_tip_1_2 | 9  | titin- partial                                             | 90 | 5.46E-43 | 88.00% | 0.098 | IPR003598 (SMART); IPR003599 (SMART); IPR013098 (PFAM); IPR013783 (G3DSA:2.60.40.GENE3D); PTHR19897 (PANTHER); PTHR19897:SF149 (PANTHER); IPR007110 (PROSITE_PROFILES); SSF48726 (SUPERFAMILY)                                                                                                                                                                                          |
| 329 | 189955_length_271_cvg_3.0_tip_1_3 | 8  | glyoxal reductase                                          | 91 | 2.29E-27 | 72.30% | 0.107 | IPR020471 (PRINTS); IPR023210 (PFAM); IPR023210 (G3DSA:3.20.20.GENE3D); PTHR11732:SF133 (PANTHER); IPR001395 (PANTHER); IPR023210 (SUPERFAMILY)                                                                                                                                                                                                                                         |
| 330 | 190181_length_271_cvg_2.0_tip_1_3 | 4  | aldehyde oxidase                                           | 91 | 6.95E-23 | 71.20% | 0.126 | IPR008274 (PFAM); IPR008274 (G3DSA:3.30.365.GENE3D); PTHR11908 (PANTHER); PTHR11908:SF65 (PANTHER); IPR008274 (SUPERFAMILY)                                                                                                                                                                                                                                                             |
| 336 | 190535_length_271_cvg_9.2_tip_1_0 | 21 | zinc finger protein 235-like                               | 91 | 5.69E-22 | 67.20% | 0.101 | IPR015880 (SMART); IPR013087 (G3DSA:3.30.160.GENE3D); IPR013087 (G3DSA:3.30.160.GENE3D); IPR013087 (G3DSA:3.30.160.GENE3D); PF13465 (PFAM); IPR007087 (PFAM); PTHR24409 (PANTHER); IPR007087 (PROSITE_PATTERNS); IPR007087 (PROSITE_PATTERNS); IPR007087 (PROSITE_PROFILES); IPR007087 (PROSITE_PROFILES); IPR007087 (PROSITE_PROFILES); SSF57667 (SUPERFAMILY)                         |
| 337 | 190807_length_272_cvg_2.0_tip_1_0 | 10 | polypeptide n-acetylgalactosaminyltransferase 2            | 91 | 6.35E-21 | 60.60% | 0.104 | PTHR11675 (PANTHER); PTHR11675:SF24 (PANTHER)                                                                                                                                                                                                                                                                                                                                           |
| 339 | 191089_length_272_cvg_2.0_tip_1_3 | 6  | protein flightless-1                                       | 91 | 3.09E-40 | 86.90% | 0.165 | IPR007123 (PFAM); IPR029006 (G3DSA:3.40.20.GENE3D); IPR029919 (PTHR11977:PANTHER); IPR007122 (PANTHER); SSF55753 (SUPERFAMILY)                                                                                                                                                                                                                                                          |
| 340 | 191129_length_272_cvg_2.3_tip_1_3 | 8  | heat shock 70 kda protein cognate 4                        | 91 | 4.77E-21 | 88.70% | 0.104 | IPR013126 (PRINTS); IPR013126 (PFAM); G3DSA:3.30.420.40 (GENE3D); PTHR19375 (PANTHER); PTHR19375:SF155 (PANTHER); IPR018181 (PROSITE_PATTERNS); SSF53067 (SUPERFAMILY)                                                                                                                                                                                                                  |

|     |                                    |     |                                                    |    |          |         |         |                                                                                                                                                                                                                                                                                                                                                                   |
|-----|------------------------------------|-----|----------------------------------------------------|----|----------|---------|---------|-------------------------------------------------------------------------------------------------------------------------------------------------------------------------------------------------------------------------------------------------------------------------------------------------------------------------------------------------------------------|
| 342 | 191811_length_273_cvg_19.9_tip_0_0 | 36  | annexin partial                                    | 91 | 1.50E-28 | 76.80%  | 0.11    | Coil (COILS); IPR001464 (PRINTS); IPR018502 (SMART); IPR018502 (G3DSA:1.10.220.GENE3D); IPR018502 (PFAM); PTHR10502 (PANTHER); IPR018252 (PROSITE PATTERNS); SSF47874 (SUPERFAMILY)                                                                                                                                                                               |
| 343 | 191813_length_273_cvg_34.0_tip_0_0 | 60  | annexin partial                                    | 91 | 6.08E-29 | 78.60%  | 0.103   | IPR001464 (PRINTS); IPR018502 (SMART); IPR018502 (G3DSA:1.10.220.GENE3D); IPR018502 (PFAM); PTHR10502 (PANTHER); IPR018252 (PROSITE PATTERNS); SSF47874 (SUPERFAMILY)                                                                                                                                                                                             |
| 344 | 191951_length_273_cvg_68.5_tip_1_3 | 217 | isoform cra_b                                      | 91 | 1.38E-56 | 100.00% | 0.128   | IPR019956 (PRINTS); IPR000626 (SMART); IPR000626 (PFAM); G3DSA:3.10.20.90 (GENE3D); G3DSA:3.10.20.90 (GENE3D); PTHR10666 (PANTHER); IPR019954 (PROSITE PATTERNS); IPR000626 (PROSITE PROFILES); IPR029071 (SUPERFAMILY)                                                                                                                                           |
| 345 | 192287_length_274_cvg_2.0_tip_1_4  | 5   | hemimentin- partial                                | 91 | 4.42E-34 | 81.40%  | 0.148   | IPR023413 (G3DSA:2.40.155.GENE3D); IPR006605 (PFAM); PTHR19897 (PANTHER); PTHR19897:SF158 (PANTHER); IPR006605 (PROSITE PROFILES); IPR009017 (SUPERFAMILY)                                                                                                                                                                                                        |
| 346 | 192597_length_274_cvg_2.0_tip_1_1  | 7   | roundabout homolog 1-like isoform x3               | 91 | 3.43E-06 | 52.40%  | 0.102   | IPR013098 (PFAM); IPR013783 (G3DSA:2.60.40.GENE3D); IPR007110 (PROSITE PROFILES); SSF48726 (SUPERFAMILY)                                                                                                                                                                                                                                                          |
| 349 | 193401_length_275_cvg_2.0_tip_1_2  | 7   | perlucin 8                                         | 91 | 3.26E-06 | 61.00%  | 0.114   | IPR016186 (G3DSA:3.10.100.GENE3D); IPR016187 (SUPERFAMILY)                                                                                                                                                                                                                                                                                                        |
| 352 | 193489_length_275_cvg_2.0_tip_1_2  | 7   | protein pbmucl2- partial                           | 91 | 4.38E-12 | 44.10%  | 0.156   | no IPS match                                                                                                                                                                                                                                                                                                                                                      |
| 354 | 193603_length_275_cvg_3.2_tip_1_5  | 11  | ubiquitin family partial                           | 91 | 1.74E-55 | 97.90%  | 0.168   | IPR019956 (PRINTS); IPR000626 (SMART); IPR000626 (PFAM); G3DSA:3.10.20.90 (GENE3D); G3DSA:3.10.20.90 (GENE3D); PTHR10666 (PANTHER); IPR019954 (PROSITE PATTERNS); IPR000626 (PROSITE PROFILES); IPR029071 (SUPERFAMILY)                                                                                                                                           |
| 347 | 193227_length_275_cvg_2.0_tip_1_3  | 6   | ---NA---                                           | 92 |          |         | 0.576 Y | IPR012674 (G3DSA:2.40.128.GENE3D); SIGNAL_PEPTIDE (PHOBIUS); SIGNAL_PEPTIDE_C_REGION (PHOBIUS); SIGNAL_PEPTIDE_N_REGION (PHOBIUS); SIGNAL_PEPTIDE_H_REGION (PHOBIUS); NON_CYTOPLASMIC_DOMAIN (PHOBIUS); SignalP-TM (SIGNALP_EUK); IPR011038 (SUPERFAMILY); TMhelix (TMHMM)                                                                                        |
| 348 | 193317_length_275_cvg_3.0_tip_1_0  | 8   | heat shock cognate 71 kda protein                  | 92 | 1.38E-21 | 96.00%  | 0.114   | IPR013126 (PRINTS); G3DSA:3.30.420.40 (GENE3D); IPR013126 (PFAM); PTHR19375 (PANTHER); PTHR19375:SF155 (PANTHER); IPR018181 (PROSITE PATTERNS); SSF53067 (SUPERFAMILY)                                                                                                                                                                                            |
| 350 | 193453_length_275_cvg_2.4_tip_1_3  | 9   | deoxyribonuclease-2-alpha isoform x3               | 92 | 7.09E-15 | 55.60%  | 0.133   | IPR004947 (PFAM); IPR004947 (PANTHER)                                                                                                                                                                                                                                                                                                                             |
| 351 | 193467_length_275_cvg_2.2_tip_1_1  | 8   | phospholipase b-like lamina ancestor               | 92 | 1.61E-26 | 68.20%  | 0.172   | IPR007000 (PFAM); IPR007000 (PANTHER); PTHR12370:SF3 (PANTHER)                                                                                                                                                                                                                                                                                                    |
| 353 | 193569_length_275_cvg_2.0_tip_1_3  | 8   | hemocytin                                          | 92 | 1.22E-21 | 67.90%  | 0.104   | G3DSA:2.10.25.10 (GENE3D)                                                                                                                                                                                                                                                                                                                                         |
| 355 | 193645_length_275_cvg_2.0_tip_1_4  | 2   | zinc finger protein partial                        | 92 | 3.51E-37 | 81.40%  | 0.118   | IPR015880 (SMART); PF13465 (PFAM); IPR013087 (G3DSA:3.30.160.GENE3D); IPR013087 (G3DSA:3.30.160.GENE3D); IPR013087 (G3DSA:3.30.160.GENE3D); PTHR19818 (PANTHER); PTHR19818:SF68 (PANTHER); IPR007087 (PROSITE PATTERNS); IPR007087 (PROSITE PATTERNS); IPR007087 (PROSITE PROFILES); IPR007087 (PROSITE PROFILES); SSF57667 (SUPERFAMILY); SSF57667 (SUPERFAMILY) |
| 356 | 193663_length_275_cvg_2.0_tip_1_0  | 7   | zinc finger protein gfi-1b isoform x2              | 92 | 1.31E-15 | 61.90%  | 0.108   | IPR015880 (SMART); IPR007087 (PFAM); PF13465 (PFAM); IPR013087 (G3DSA:3.30.160.GENE3D); IPR013087 (G3DSA:3.30.160.GENE3D); PTHR24409 (PANTHER); IPR007087 (PROSITE PATTERNS); IPR007087 (PROSITE PATTERNS); IPR007087 (PROSITE PATTERNS); IPR007087 (PROSITE PATTERNS); IPR007087 (PROSITE PROFILES); IPR007087 (PROSITE PROFILES); SSF57667 (SUPERFAMILY)        |
| 357 | 193683_length_275_cvg_2.0_tip_1_1  | 6   | protein creg1                                      | 92 | 8.85E-20 | 74.00%  | 0.113   | IPR012349 (G3DSA:2.30.110.GENE3D); PF13883 (PFAM); PTHR13343 (PANTHER); PTHR13343:SF17 (PANTHER); IPR012349 (SUPERFAMILY)                                                                                                                                                                                                                                         |
| 358 | 193949_length_276_cvg_7.8_tip_1_5  | 26  | krueppel-like factor 15                            | 92 | 1.40E-19 | 87.00%  | 0.122   | IPR015880 (SMART); PF13465 (PFAM); IPR013087 (G3DSA:3.30.160.GENE3D); IPR013087 (G3DSA:3.30.160.GENE3D); PTHR23223 (PANTHER); PTHR23223:SF146 (PANTHER); IPR007087 (PROSITE PATTERNS); IPR007087 (PROSITE PROFILES); SSF57667 (SUPERFAMILY)                                                                                                                       |
| 359 | 194175_length_276_cvg_2.0_tip_1_0  | 3   | fat-like cadherin-related tumor suppressor homolog | 92 | 5.82E-28 | 70.70%  | 0.101   | IPR002126 (PRINTS); IPR002126 (G3DSA:2.60.40.GENE3D); IPR002126 (PFAM); PTHR24026 (PANTHER); PTHR24026:SF39 (PANTHER); IPR020894 (PROSITE PATTERNS); IPR002126 (PROSITE PROFILES); IPR015919 (SUPERFAMILY); IPR015919 (SUPERFAMILY)                                                                                                                               |
| 360 | 194203_length_276_cvg_2.3_tip_1_1  | 5   | lysosomal pro-x partial                            | 92 | 1.67E-37 | 82.30%  | 0.113   | IPR008758 (PFAM); IPR029058 (G3DSA:3.40.50.GENE3D); PTHR11010:SF11 (PANTHER); IPR008758 (PANTHER); IPR029058 (SUPERFAMILY)                                                                                                                                                                                                                                        |
| 361 | 194363_length_276_cvg_2.0_tip_1_3  | 8   | isoform c                                          | 92 | 6.49E-36 | 82.20%  | 0.121   | IPR000716 (SMART); IPR000716 (G3DSA:4.10.800.GENE3D); IPR000716 (PFAM); PTHR12036 (PANTHER); IPR000716 (PROSITE PATTERNS); IPR000716 (PROSITE PROFILES); IPR000716 (SUPERFAMILY)                                                                                                                                                                                  |
| 362 | 194735_length_277_cvg_3.0_tip_1_2  | 7   | carboxypeptidase pm20d1                            | 92 | 1.33E-29 | 72.90%  | 0.098   | PTHR11014:SF66 (PANTHER); PTHR11014 (PANTHER)                                                                                                                                                                                                                                                                                                                     |
| 370 | 195593_length_278_cvg_4.9_tip_1_5  | 13  | vanin-like protein 1                               | 92 | 1.63E-26 | 69.40%  | 0.137   | IPR003010 (G3DSA:3.60.110.GENE3D); IPR012101 (PANTHER); IPR003010 (SUPERFAMILY)                                                                                                                                                                                                                                                                                   |

|     |                                    |     |                                                            |    |          |        |       |                                                                                                                                                                                                                                                                                                                                                                       |
|-----|------------------------------------|-----|------------------------------------------------------------|----|----------|--------|-------|-----------------------------------------------------------------------------------------------------------------------------------------------------------------------------------------------------------------------------------------------------------------------------------------------------------------------------------------------------------------------|
| 363 | 195085_length_278_cvg_4.0_tip_1_4  | 10  | neprilysin-2 isoform x3                                    | 93 | 2.51E-33 | 76.90% | 0.255 | IPR018497 (PRINTS); IPR018497 (PFAM); IPR024079 (G3DSA:3.40.390.GENE3D); IPR000718 (PANTHER); PTHR11733:SF113 (PANTHER); SSF55486 (SUPERFAMILY)                                                                                                                                                                                                                       |
| 364 | 195145_length_278_cvg_6.0_tip_1_4  | 21  | ankyrin repeat domain-containing protein 16                | 93 | 4.11E-16 | 63.90% | 0.241 | IPR002110 (SMART); IPR020683 (PFAM); IPR020683 (G3DSA:1.25.40.GENE3D); PTHR24198 (PANTHER); IPR020683 (PROSITE_PROFILES); IPR002110 (PROSITE_PROFILES); IPR020683 (SUPERFAMILY)                                                                                                                                                                                       |
| 365 | 195201_length_278_cvg_3.0_tip_1_1  | 7   | fat-like cadherin-related tumor suppressor homolog         | 93 | 6.22E-42 | 89.20% | 0.108 | IPR002126 (PRINTS); IPR002126 (SMART); IPR002126 (G3DSA:2.60.40.GENE3D); IPR002126 (PFAM); PTHR24026 (PANTHER); PTHR24026:SF39 (PANTHER); IPR020894 (PROSITE_PATTERNS); IPR002126 (PROSITE_PROFILES); IPR015919 (SUPERFAMILY)                                                                                                                                         |
| 366 | 195327_length_278_cvg_5.3_tip_1_1  | 17  | low-density lipoprotein receptor-related protein 2         | 93 | 8.02E-42 | 86.60% | 0.133 | IPR000033 (SMART); IPR011042 (G3DSA:2.120.10.GENE3D); IPR000033 (PFAM); PTHR10529:SF210 (PANTHER); PTHR10529 (PANTHER); IPR000033 (PROSITE_PROFILES); IPR000033 (PROSITE_PROFILES); IPR000033 (PROSITE_PROFILES); SSF63825 (SUPERFAMILY)                                                                                                                              |
| 367 | 195353_length_278_cvg_3.0_tip_1_4  | 8   | serine threonine-protein kinase ulk3 isoform x1            | 93 | 3.48E-38 | 81.40% | 0.111 | G3DSA:1.10.510.10 (GENE3D); IPR000719 (PFAM); PTHR24348 (PANTHER); IPR000719 (PROSITE_PROFILES); IPR011009 (SUPERFAMILY)                                                                                                                                                                                                                                              |
| 368 | 195399_length_278_cvg_54.7_tip_1_1 | 179 | ---NA---                                                   | 93 |          |        | 0.105 | no IPS match                                                                                                                                                                                                                                                                                                                                                          |
| 369 | 195575_length_278_cvg_2.0_tip_1_3  | 7   | low-density lipoprotein receptor-related protein partial   | 93 | 9.44E-15 | 60.10% | 0.118 | IPR002172 (SMART); IPR002172 (PFAM); IPR002172 (G3DSA:4.10.400.GENE3D); PTHR10529 (PANTHER); IPR023415 (PROSITE_PATTERNS); IPR002172 (PROSITE_PROFILES); IPR002172 (SUPERFAMILY)                                                                                                                                                                                      |
| 371 | 195843_length_279_cvg_12.0_tip_1_0 | 30  | ---NA---                                                   | 93 |          |        | 0.099 | no IPS match                                                                                                                                                                                                                                                                                                                                                          |
| 372 | 196005_length_279_cvg_3.0_tip_1_0  | 10  | matrix metalloproteinase 1 isoform 1                       | 93 | 1.72E-34 | 77.80% | 0.113 | IPR018487 (SMART); IPR018487 (PFAM); IPR000585 (G3DSA:2.110.10.GENE3D); PTHR10201 (PANTHER); PTHR10201:SF131 (PANTHER); IPR018487 (PROSITE_PROFILES); IPR018487 (PROSITE_PROFILES); IPR000585 (SUPERFAMILY)                                                                                                                                                           |
| 373 | 196093_length_279_cvg_2.0_tip_1_4  | 4   | zinc finger protein 628                                    | 93 | 1.14E-29 | 76.40% | 0.109 | IPR015880 (SMART); IPR013087 (G3DSA:3.30.160.GENE3D); PF13465 (PFAM); IPR013087 (G3DSA:3.30.160.GENE3D); IPR013087 (G3DSA:3.30.160.GENE3D); PTHR24409 (PANTHER); IPR007087 (PROSITE_PATTERNS); IPR007087 (PROSITE_PATTERNS); IPR007087 (PROSITE_PROFILES); IPR007087 (PROSITE_PROFILES); IPR007087 (PROSITE_PROFILES); SSF57667 (SUPERFAMILY); SSF57667 (SUPERFAMILY) |
| 374 | 196169_length_279_cvg_3.0_tip_1_0  | 11  | metabotropic gaba-b receptor subtype isoform b             | 93 | 4.15E-39 | 86.10% | 0.16  | IPR002456 (PRINTS); G3DSA:3.40.50.2300 (GENE3D); IPR001828 (PFAM); PTHR10519:SF3 (PANTHER); IPR002455 (PANTHER); IPR028082 (SUPERFAMILY)                                                                                                                                                                                                                              |
| 375 | 196549_length_280_cvg_2.0_tip_1_2  | 5   | cysteine peptidase c                                       | 93 | 2.39E-26 | 79.00% | 0.119 | IPR000668 (PFAM); G3DSA:3.90.70.10 (GENE3D); PTHR12411:SF286 (PANTHER); IPR013128 (PANTHER); SSF54001 (SUPERFAMILY)                                                                                                                                                                                                                                                   |
| 376 | 196601_length_280_cvg_3.0_tip_1_4  | 9   | peroxisome biogenesis factor 1-like                        | 93 | 2.23E-52 | 93.30% | 0.24  | IPR027417 (G3DSA:3.40.50.GENE3D); IPR003959 (PFAM); IPR025653 (PTHR23077:PANTHER); PTHR23077 (PANTHER); IPR027417 (SUPERFAMILY)                                                                                                                                                                                                                                       |
| 377 | 196671_length_280_cvg_2.0_tip_1_5  | 5   | glypican- partial                                          | 93 | 1.13E-08 | 80.57% | 0.125 | IPR001863 (PFAM)                                                                                                                                                                                                                                                                                                                                                      |
| 378 | 196755_length_280_cvg_93.4_tip_0_2 | 194 | muc19_human ame: full=mucin-19 short=muc-19 flags: partial | 93 | 9.48E-07 | 49.00% | 0.119 | no IPS match                                                                                                                                                                                                                                                                                                                                                          |
| 380 | 197279_length_281_cvg_12.6_tip_1_2 | 15  | bola-like protein 3                                        | 93 | 5.66E-23 | 76.40% | 0.107 | G3DSA:3.30.70.1500 (GENE3D); IPR002634 (PFAM); PTHR12735 (PANTHER); PTHR12735:SF4 (PANTHER); IPR002634 (SUPERFAMILY)                                                                                                                                                                                                                                                  |
| 379 | 196973_length_281_cvg_2.0_tip_1_0  | 6   | elastase                                                   | 94 | 2.13E-20 | 64.20% | 0.097 | IPR023612 (PRINTS); IPR013856 (PFAM); IPR013856 (G3DSA:3.10.170.GENE3D); SSF55486 (SUPERFAMILY)                                                                                                                                                                                                                                                                       |
| 381 | 197575_length_282_cvg_2.0_tip_1_1  | 7   | st14a protein                                              | 94 | 1.74E-09 | 55.90% | 0.141 | IPR001254 (PFAM); G3DSA:2.40.10.10 (GENE3D); IPR009003 (SUPERFAMILY)                                                                                                                                                                                                                                                                                                  |
| 382 | 197833_length_282_cvg_3.0_tip_1_4  | 8   | serine threonine-protein kinase kin4                       | 94 | 1.16E-41 | 81.20% | 0.104 | IPR000719 (PFAM); G3DSA:1.10.510.10 (GENE3D); PTHR24359 (PANTHER); PTHR24359:SF18 (PANTHER); IPR008271 (PROSITE_PATTERNS); IPR000719 (PROSITE_PROFILES); IPR011009 (SUPERFAMILY)                                                                                                                                                                                      |
| 383 | 197843_length_282_cvg_2.0_tip_1_0  | 8   | zinc finger protein 492-like                               | 94 | 7.27E-28 | 76.00% | 0.13  | IPR015880 (SMART); IPR013087 (G3DSA:3.30.160.GENE3D); IPR013087 (G3DSA:3.30.160.GENE3D); IPR013087 (G3DSA:3.30.160.GENE3D); PF13465 (PFAM); PTHR24409 (PANTHER); PTHR24409:SF13 (PANTHER); IPR007087 (PROSITE_PATTERNS); IPR007087 (PROSITE_PATTERNS); IPR007087 (PROSITE_PROFILES); IPR007087 (PROSITE_PROFILES); SSF57667 (SUPERFAMILY)                             |
| 384 | 198269_length_283_cvg_4.0_tip_1_1  | 9   | leucine-rich repeat-containing protein 58-like             | 94 | 1.58E-31 | 79.70% | 0.108 | SM00364 (SMART); IPR003591 (SMART); IPR025875 (PFAM); G3DSA:3.80.10.10 (GENE3D); PTHR23155 (PANTHER); IPR001611 (PROSITE_PROFILES); IPR001611 (PROSITE_PROFILES); IPR001611 (PROSITE_PROFILES); SSF52075 (SUPERFAMILY)                                                                                                                                                |
| 385 | 198529_length_283_cvg_18.2_tip_0_5 | 41  | golgin subfamily a member 6-like protein 22                | 94 | 8.21E-09 | 52.20% | 0.101 | no IPS match                                                                                                                                                                                                                                                                                                                                                          |

|     |                                   |    |                                                                                     |    |          |        |         |                                                                                                                                                                                                                                                                                                                                |
|-----|-----------------------------------|----|-------------------------------------------------------------------------------------|----|----------|--------|---------|--------------------------------------------------------------------------------------------------------------------------------------------------------------------------------------------------------------------------------------------------------------------------------------------------------------------------------|
| 386 | 198611_length_283_cvg_3.0_tip_1_5 | 8  | u5 small nuclear ribonucleoprotein 40 kda                                           | 94 | 9.69E-47 | 85.40% | 0.108   | IPR001680 (SMART); IPR015943 (G3DSA:2.130.10.GENE3D); IPR001680 (PFAM); PTHR22847 (PANTHER); IPR019775 (PROSITE_PATTERNS); IPR019775 (PROSITE_PATTERNS); IPR001680 (PROSITE_PROFILES); IPR001680 (PROSITE_PROFILES); IPR017986 (PROSITE_PROFILES); IPR017986 (SUPERFAMILY)                                                     |
| 387 | 198777_length_284_cvg_3.0_tip_1_5 | 7  | phospholipase b-like 2                                                              | 94 | 6.80E-30 | 73.90% | 0.101   | IPR007000 (PFAM); IPR007000 (PANTHER)                                                                                                                                                                                                                                                                                          |
| 389 | 199253_length_284_cvg_3.0_tip_1_5 | 9  | c-type lectin domain family 4 member m-like                                         | 94 | 3.26E-19 | 60.00% | 0.146   | IPR001304 (SMART); IPR001304 (PFAM); IPR016186 (G3DSA:3.10.100.GENE3D); PTHR22801 (PANTHER); IPR001304 (PROSITE_PROFILES); IPR016187 (SUPERFAMILY)                                                                                                                                                                             |
| 390 | 199263_length_284_cvg_3.0_tip_1_5 | 10 | krueppel-like factor partial                                                        | 94 | 1.50E-37 | 86.80% | 0.195   | IPR015880 (SMART); IPR013087 (G3DSA:3.30.160.GENE3D); IPR013087 (G3DSA:3.30.160.GENE3D); PF13465 (PFAM); PTHR23223 (PANTHER); IPR007087 (PROSITE_PATTERNS); IPR007087 (PROSITE_PATTERNS); IPR007087 (PROSITE_PROFILES); IPR007087 (PROSITE_PROFILES); SSF57667 (SUPERFAMILY)                                                   |
| 388 | 199067_length_284_cvg_2.0_tip_1_1 | 7  | carboxypeptidase e                                                                  | 95 | 6.68E-28 | 65.90% | 0.114   | PF13620 (PFAM); IPR014766 (G3DSA:2.60.40.GENE3D); PTHR11532:SF41 (PANTHER); PTHR11532 (PANTHER); IPR008969 (SUPERFAMILY)                                                                                                                                                                                                       |
| 391 | 199589_length_285_cvg_2.0_tip_1_0 | 6  | ankyrin repeat                                                                      | 95 | 1.04E-18 | 59.50% | 0.127   | IPR002110 (PRINTS); IPR002110 (SMART); IPR020683 (G3DSA:1.25.40.GENE3D); IPR020683 (PFAM); PTHR24188 (PANTHER); IPR020683 (PROSITE_PROFILES); IPR002110 (PROSITE_PROFILES); IPR002110 (PROSITE_PROFILES); IPR020683 (SUPERFAMILY)                                                                                              |
| 392 | 199851_length_285_cvg_4.0_tip_1_2 | 10 | xanthine dehydrogenase-like                                                         | 95 | 5.34E-31 | 79.00% | 0.105   | IPR000674 (PFAM); IPR000674 (G3DSA:3.90.1170.GENE3D); IPR008274 (G3DSA:3.30.365.GENE3D); PTHR11908:SF32 (PANTHER); PTHR11908 (PANTHER); IPR000674 (SUPERFAMILY)                                                                                                                                                                |
| 395 | 200073_length_286_cvg_4.8_tip_1_5 | 13 | basement membrane-specific heparan sulfate proteoglycan core protein                | 95 | 4.82E-24 | 66.70% | 0.104   | IPR000034 (PFAM); IPR000034 (PROSITE_PROFILES)                                                                                                                                                                                                                                                                                 |
| 397 | 200207_length_286_cvg_3.4_tip_1_5 | 4  | zinc finger protein 850-like                                                        | 95 | 2.51E-15 | 63.90% | 0.102   | IPR015880 (SMART); IPR013087 (G3DSA:3.30.160.GENE3D); PF13465 (PFAM); IPR013087 (G3DSA:3.30.160.GENE3D); PTHR24409 (PANTHER); PTHR24409:SF14 (PANTHER); IPR007087 (PROSITE_PATTERNS); IPR007087 (PROSITE_PATTERNS); IPR007087 (PROSITE_PROFILES); IPR007087 (PROSITE_PROFILES); SSF57667 (SUPERFAMILY)                         |
| 393 | 199867_length_286_cvg_2.0_tip_1_0 | 4  | acid sphingomyelinase-like phosphodiesterase 3b                                     | 96 | 2.26E-20 | 56.20% | 0.241   | IPR029052 (G3DSA:3.60.21.GENE3D); PTHR10340 (PANTHER); IPR029052 (SUPERFAMILY)                                                                                                                                                                                                                                                 |
| 394 | 199935_length_286_cvg_2.0_tip_1_3 | 4  | von willebrand factor type egf and pentraxin domain-containing protein 1 isoform x2 | 96 | 2.59E-30 | 76.80% | 0.102   | IPR000436 (SMART); G3DSA:2.10.70.10 (GENE3D); IPR000436 (PFAM); PTHR19325 (PANTHER); IPR000436 (PROSITE_PROFILES); IPR000436 (PROSITE_PROFILES); IPR000436 (SUPERFAMILY); IPR000436 (SUPERFAMILY)                                                                                                                              |
| 396 | 200095_length_286_cvg_2.0_tip_1_3 | 5  | macrophage mannose receptor 1-like                                                  | 96 | 6.01E-07 | 48.14% | 0.104   | IPR016186 (G3DSA:3.10.100.GENE3D); IPR016186 (G3DSA:3.10.100.GENE3D); PTHR22803:SF16 (PANTHER); PTHR22803 (PANTHER); IPR001304 (PROSITE_PROFILES); IPR016187 (SUPERFAMILY)                                                                                                                                                     |
| 398 | 200413_length_287_cvg_6.0_tip_1_3 | 15 | dnaj homolog subfamily c member 21-like                                             | 96 | 7.17E-36 | 87.30% | 0.129   | IPR001623 (PRINTS); IPR001623 (SMART); IPR001623 (G3DSA:1.10.287.GENE3D); IPR001623 (PFAM); PTHR24078 (PANTHER); PTHR24078:SF150 (PANTHER); IPR018253 (PROSITE_PATTERNS); IPR001623 (PROSITE_PROFILES); IPR001623 (SUPERFAMILY)                                                                                                |
| 399 | 200589_length_287_cvg_2.0_tip_1_0 | 5  | homeotic protein spalt-major-like                                                   | 96 | 6.32E-59 | 97.00% | 0.108   | IPR015880 (SMART); IPR013087 (G3DSA:3.30.160.GENE3D); IPR013087 (G3DSA:3.30.160.GENE3D); PF13465 (PFAM); PTHR23233 (PANTHER); PTHR23233:SF49 (PANTHER); IPR007087 (PROSITE_PATTERNS); IPR007087 (PROSITE_PATTERNS); IPR007087 (PROSITE_PROFILES); IPR007087 (PROSITE_PROFILES); SSF57667 (SUPERFAMILY)                         |
| 400 | 200803_length_287_cvg_3.0_tip_1_4 | 9  | venom serine carboxypeptidase-like                                                  | 96 | 4.64E-15 | 61.70% | 0.195   | IPR001563 (PFAM); IPR029058 (G3DSA:3.40.50.GENE3D); IPR001563 (PANTHER); IPR029058 (SUPERFAMILY)                                                                                                                                                                                                                               |
| 401 | 201041_length_288_cvg_2.9_tip_1_2 | 11 | zinc c2h2 type domain-containing protein                                            | 96 | 8.75E-15 | 58.30% | 0.103   | IPR015880 (SMART); IPR013087 (G3DSA:3.30.160.GENE3D); IPR013087 (G3DSA:3.30.160.GENE3D); PF13465 (PFAM); PTHR24409 (PANTHER); PTHR24409:SF14 (PANTHER); IPR007087 (PROSITE_PATTERNS); IPR007087 (PROSITE_PATTERNS); IPR007087 (PROSITE_PROFILES); IPR007087 (PROSITE_PROFILES); SSF57667 (SUPERFAMILY); SSF57667 (SUPERFAMILY) |
| 402 | 201145_length_288_cvg_2.0_tip_1_4 | 6  | serine threonine-protein kinase osr1 isoform x1                                     | 96 | 2.02E-53 | 94.50% | 0.485 Y | G3DSA:3.30.200.20 (GENE3D); IPR000719 (PFAM); G3DSA:1.10.510.10 (GENE3D); PTHR24361 (PANTHER); PTHR24361:SF201 (PANTHER); IPR000719 (PROSITE_PROFILES); SignalP-noTM (SIGNALP_EUK); IPR011009 (SUPERFAMILY)                                                                                                                    |
| 403 | 201345_length_288_cvg_2.0_tip_1_4 | 4  | transport and golgi organization protein 1                                          | 96 | 1.83E-17 | 65.00% | 0.413 Y | G3DSA:2.30.30.40 (GENE3D); IPR001452 (SUPERFAMILY)                                                                                                                                                                                                                                                                             |



|     |                                    |    |                                                                                                                                |    |          |        |         |                                                                                                                                                                                                                                                                                                                                                                                                                      |
|-----|------------------------------------|----|--------------------------------------------------------------------------------------------------------------------------------|----|----------|--------|---------|----------------------------------------------------------------------------------------------------------------------------------------------------------------------------------------------------------------------------------------------------------------------------------------------------------------------------------------------------------------------------------------------------------------------|
| 404 | 201455_length_289_cvg_2.0_tip_1_1  | 3  | basement membrane-specific heparan sulfate proteoglycan core protein                                                           | 96 | 4.75E-11 | 59.30% | 0.105   | IPR002172 (SMART); IPR002172 (G3DSA:4.10.400.GENE3D); IPR002172 (PFAM); PTHR10529:SF3 (PANTHER); PTHR10529 (PANTHER); IPR023415 (PROSITE_PATTERNS); IPR002172 (PROSITE_PROFILES); IPR002172 (SUPERFAMILY)                                                                                                                                                                                                            |
| 405 | 201465_length_289_cvg_2.0_tip_1_4  | 5  | fat-like cadherin-related tumor suppressor-like protein                                                                        | 96 | 7.97E-38 | 87.80% | 0.1     | IPR002126 (PRINTS); IPR002126 (SMART); IPR002126 (G3DSA:2.60.40.GENE3D); IPR002126 (PFAM); PTHR24026:SF39 (PANTHER); PTHR24026 (PANTHER); IPR020894 (PROSITE_PATTERNS); IPR002126 (PROSITE_PROFILES); IPR015919 (SUPERFAMILY)                                                                                                                                                                                        |
| 406 | 201801_length_289_cvg_30.0_tip_1_4 | 81 | plasma alpha-l-fucosidase-like                                                                                                 | 96 | 3.21E-26 | 79.50% | 0.606 Y | IPR013781 (G3DSA:3.20.20.GENE3D); IPR000933 (PFAM); IPR000933 (PANTHER); PTHR10030:SF26 (PANTHER); TRANSMEMBRANE (PHOBIUS); CYTOPLASMIC_DOMAIN (PHOBIUS); SIGNAL_PEPTIDE_H_REGION (PHOBIUS); SIGNAL_PEPTIDE (PHOBIUS); SIGNAL_PEPTIDE_C_REGION (PHOBIUS); SIGNAL_PEPTIDE_N_REGION (PHOBIUS); NON_CYTOPLASMIC_DOMAIN (PHOBIUS); SignalP-noTM (SIGNALP_EUK); IPR017853 (SUPERFAMILY); TMhelix (TMHMM); TMhelix (TMHMM) |
| 408 | 202485_length_290_cvg_3.7_tip_1_5  | 10 | ankyrin repeat                                                                                                                 | 96 | 2.77E-19 | 60.50% | 0.127   | IPR002110 (PRINTS); IPR002110 (SMART); IPR020683 (G3DSA:1.25.40.GENE3D); IPR020683 (PFAM); PTHR24198 (PANTHER); IPR002110 (PROSITE_PROFILES); IPR002110 (PROSITE_PROFILES); IPR020683 (PROSITE_PROFILES); IPR002110 (PROSITE_PROFILES); IPR020683 (SUPERFAMILY)                                                                                                                                                      |
| 407 | 201849_length_289_cvg_7.8_tip_1_3  | 37 | leucine-rich repeats and immunoglobulin-like domains protein 3 isoform x2                                                      | 97 | 3.47E-10 | 54.00% | 0.112   | no IPS match                                                                                                                                                                                                                                                                                                                                                                                                         |
| 409 | 202487_length_290_cvg_3.9_tip_1_1  | 14 | glucose dehydrogenase                                                                                                          | 97 | 7.00E-23 | 74.80% | 0.1     | G3DSA:3.50.50.60 (GENE3D); IPR000172 (PFAM); PTHR11552 (PANTHER); PTHR11552:SF77 (PANTHER); IPR000172 (PROSITE_PATTERNS); SSF51905 (SUPERFAMILY)                                                                                                                                                                                                                                                                     |
| 410 | 202663_length_291_cvg_2.0_tip_1_4  | 5  | zinc finger protein                                                                                                            | 97 | 1.59E-13 | 52.90% | 0.101   | IPR015880 (SMART); PF13894 (PFAM); IPR013087 (G3DSA:3.30.160.GENE3D); PTHR24375:SF106 (PANTHER); PTHR24375 (PANTHER); IPR007087 (PROSITE_PATTERNS); IPR007087 (PROSITE_PATTERNS); IPR007087 (PROSITE_PROFILES); IPR007087 (PROSITE_PROFILES); SSF57667 (SUPERFAMILY); SSF57667 (SUPERFAMILY)                                                                                                                         |
| 411 | 202865_length_291_cvg_5.5_tip_1_3  | 21 | achain structural determinants for improved thermal stability of designed ankyrin repeat proteins with a redesigned c- capping | 97 | 2.86E-14 | 63.10% | 0.141   | IPR002110 (SMART); IPR020683 (PFAM); IPR020683 (G3DSA:1.25.40.GENE3D); PTHR24188 (PANTHER); IPR002110 (PROSITE_PROFILES); IPR020683 (PROSITE_PROFILES); IPR002110 (PROSITE_PROFILES); IPR020683 (SUPERFAMILY)                                                                                                                                                                                                        |
| 412 | 202903_length_291_cvg_4.0_tip_1_0  | 11 | low-density lipoprotein receptor-related protein 2                                                                             | 97 | 7.71E-34 | 77.20% | 0.107   | IPR002172 (PRINTS); IPR002172 (SMART); IPR002172 (G3DSA:4.10.400.GENE3D); G3DSA:4.10.1220.10 (GENE3D); IPR002172 (PFAM); IPR002172 (G3DSA:4.10.400.GENE3D); PTHR10529 (PANTHER); IPR002172 (PROSITE_PROFILES); IPR002172 (PROSITE_PROFILES); IPR002172 (SUPERFAMILY); IPR002172 (SUPERFAMILY)                                                                                                                        |
| 413 | 203111_length_292_cvg_2.0_tip_1_2  | 6  | aael012493- partial                                                                                                            | 97 | 2.84E-36 | 80.20% | 0.114   | IPR006652 (SMART); IPR015915 (G3DSA:2.120.10.GENE3D); IPR006652 (PFAM); PTHR10574 (PANTHER); PTHR10574:SF3 (PANTHER); SSF117281 (SUPERFAMILY)                                                                                                                                                                                                                                                                        |
| 416 | 203233_length_292_cvg_4.0_tip_1_1  | 10 | adp-ribosylation factor-like protein 4c                                                                                        | 97 | 1.95E-54 | 92.20% | 0.156   | IPR006689 (PRINTS); IPR006689 (PFAM); IPR027417 (G3DSA:3.40.50.GENE3D); IPR005225 (TIGRFAM); PTHR11711:SF121 (PANTHER); PTHR11711 (PANTHER); IPR024156 (PROSITE_PROFILES); IPR027417 (SUPERFAMILY)                                                                                                                                                                                                                   |
| 418 | 203411_length_292_cvg_2.5_tip_1_4  | 10 | low affinity immunoglobulin epsilon fc receptor                                                                                | 97 | 7.88E-15 | 55.30% | 0.183   | IPR001304 (SMART); IPR016186 (G3DSA:3.10.100.GENE3D); IPR001304 (PFAM); PTHR22802 (PANTHER); IPR001304 (PROSITE_PROFILES); IPR016187 (SUPERFAMILY)                                                                                                                                                                                                                                                                   |
| 414 | 203131_length_292_cvg_4.7_tip_1_0  | 11 | alcohol dehydrogenase                                                                                                          | 98 | 5.41E-13 | 69.90% | 0.13    | IPR023210 (G3DSA:3.20.20.GENE3D); IPR001395 (PANTHER); PTHR11732:SF144 (PANTHER); IPR018170 (PROSITE_PATTERNS); IPR023210 (SUPERFAMILY)                                                                                                                                                                                                                                                                              |
| 415 | 203181_length_292_cvg_3.9_tip_1_0  | 9  | coagulation factor x- partial                                                                                                  | 98 | 6.74E-14 | 59.10% | 0.103   | IPR001254 (PFAM); G3DSA:2.40.10.10 (GENE3D); G3DSA:2.40.10.10 (GENE3D); PTHR24265 (PANTHER); IPR018114 (PROSITE_PATTERNS); IPR001254 (PROSITE_PROFILES); IPR009003 (SUPERFAMILY)                                                                                                                                                                                                                                     |
| 417 | 203409_length_292_cvg_3.0_tip_1_0  | 9  | ---NA---                                                                                                                       | 98 |          |        | 0.103   | Coil (COILS); IPR016186 (G3DSA:3.10.100.GENE3D); IPR016187 (SUPERFAMILY)                                                                                                                                                                                                                                                                                                                                             |
| 419 | 203787_length_293_cvg_3.0_tip_1_1  | 9  | zinc finger and scan domain-containing protein 2-like isoform x1                                                               | 98 | 1.87E-49 | 86.40% | 0.103   | IPR015880 (SMART); IPR013087 (G3DSA:3.30.160.GENE3D); IPR013087 (G3DSA:3.30.160.GENE3D); PF13465 (PFAM); PTHR24409 (PANTHER); IPR007087 (PROSITE_PATTERNS); IPR007087 (PROSITE_PATTERNS); IPR007087 (PROSITE_PROFILES); IPR007087 (PROSITE_PROFILES); SSF57667 (SUPERFAMILY); SSF57667 (SUPERFAMILY)                                                                                                                 |
| 420 | 204119_length_294_cvg_2.0_tip_1_2  | 5  | cbl-interacting protein kinase 16-like isoform x1                                                                              | 98 | 3.43E-45 | 86.10% | 0.122   | IPR000719 (PFAM); G3DSA:1.10.510.10 (GENE3D); PTHR24342 (PANTHER); IPR000719 (PROSITE_PROFILES); IPR011009 (SUPERFAMILY)                                                                                                                                                                                                                                                                                             |



|     |                                   |    |                                                             |     |          |        |         |                                                                                                                                                                                                                                                                                                                                 |
|-----|-----------------------------------|----|-------------------------------------------------------------|-----|----------|--------|---------|---------------------------------------------------------------------------------------------------------------------------------------------------------------------------------------------------------------------------------------------------------------------------------------------------------------------------------|
| 421 | 204223_length_294_cvg_2.0_tip_1_3 | 5  | sucrase- intestinal-like                                    | 98  | 1.86E-18 | 60.30% | 0.1     | PTHR22762:SF69 (PANTHER); PTHR22762 (PANTHER); IPR011013 (SUPERFAMILY)                                                                                                                                                                                                                                                          |
| 422 | 204269_length_294_cvg_2.0_tip_1_0 | 7  | receptor-type tyrosine-protein phosphatase kappa            | 98  | 1.06E-45 | 84.80% | 0.117   | IPR000242 (PFAM); IPR029021 (G3DSA:3.90.190.GENE3D); PTHR19134:SF227 (PANTHER); PTHR19134 (PANTHER); IPR000242 (PROSITE_PROFILES); IPR029021 (SUPERFAMILY)                                                                                                                                                                      |
| 423 | 204527_length_294_cvg_2.0_tip_1_5 | 7  | low-density lipoprotein                                     | 98  | 5.33E-28 | 70.40% | 0.103   | IPR000742 (SMART); IPR001881 (SMART); IPR001881 (PFAM); G3DSA:2.10.25.10 (GENE3D); G3DSA:2.10.25.10 (GENE3D); PTHR10529:SF204 (PANTHER); PTHR10529 (PANTHER); IPR018097 (PROSITE_PATTERNS); IPR018097 (PROSITE_PATTERNS); IPR000152 (PROSITE_PATTERNS); SSF57196 (SUPERFAMILY); SSF57196 (SUPERFAMILY)                          |
| 425 | 205001_length_296_cvg_3.9_tip_1_2 | 17 | heat shock cognate 71 kda                                   | 98  | 9.06E-50 | 98.00% | 0.186   | IPR013126 (PRINTS); G3DSA:3.30.30.30 (GENE3D); IPR013126 (PFAM); G3DSA:3.30.420.40 (GENE3D); PTHR19375 (PANTHER); PTHR19375:SF142 (PANTHER); IPR018181 (PROSITE_PATTERNS); SSF53067 (SUPERFAMILY)                                                                                                                               |
| 427 | 205261_length_296_cvg_4.0_tip_1_5 | 11 | tyrosine-protein phosphatase lar isoform x1                 | 98  | 1.56E-35 | 80.00% | 0.102   | PR00014 (PRINTS); IPR003961 (SMART); IPR013783 (G3DSA:2.60.40.GENE3D); IPR003961 (PFAM); PTHR19134:SF204 (PANTHER); PTHR19134 (PANTHER); IPR003961 (PROSITE_PROFILES); IPR003961 (SUPERFAMILY)                                                                                                                                  |
| 424 | 204979_length_296_cvg_8.0_tip_1_4 | 21 | pacifastin-related peptide precursor                        | 99  | 5.92E-10 | 58.22% | 0.626 Y | IPR008037 (PFAM); SIGNAL_PEPTIDE_H_REGION (PHOBIUS); SIGNAL_PEPTIDE_C_REGION (PHOBIUS); SIGNAL_PEPTIDE_N_REGION (PHOBIUS); SIGNAL_PEPTIDE (PHOBIUS); NON_CYTOPLASMIC_DOMAIN (PHOBIUS); IPR020862 (PROSITE_PROFILES); IPR020862 (PROSITE_PROFILES); SignalP-noTM (SIGNALP_EUK); IPR008037 (SUPERFAMILY); IPR008037 (SUPERFAMILY) |
| 426 | 205107_length_296_cvg_2.8_tip_1_0 | 9  | gamma-glutamyltranspeptidase 1                              | 99  | 7.43E-35 | 75.80% | 0.098   | IPR000101 (PRINTS); IPR000101 (PFAM); IPR000101 (PANTHER); PTHR11686:SF15 (PANTHER); IPR029055 (SUPERFAMILY)                                                                                                                                                                                                                    |
| 428 | 205423_length_296_cvg_2.8_tip_1_4 | 11 | peripheral plasma membrane protein partial                  | 99  | 4.19E-39 | 81.30% | 0.598 Y | G3DSA:1.10.510.10 (GENE3D); IPR000719 (PFAM); PTHR24347:SF136 (PANTHER); IPR020636 (PANTHER); SIGNAL_PEPTIDE (PHOBIUS); NON_CYTOPLASMIC_DOMAIN (PHOBIUS); SIGNAL_PEPTIDE_N_REGION (PHOBIUS); SIGNAL_PEPTIDE_C_REGION (PHOBIUS); SIGNAL_PEPTIDE_H_REGION (PHOBIUS); IPR000719 (PROSITE_PROFILES); IPR011009 (SUPERFAMILY)        |
| 429 | 205491_length_297_cvg_3.0_tip_1_3 | 8  | macrophage mannose receptor 1-like                          | 99  | 9.94E-11 | 55.30% | 0.108   | IPR001304 (PFAM); IPR016186 (G3DSA:3.10.100.GENE3D); IPR016186 (G3DSA:3.10.100.GENE3D); PTHR22803 (PANTHER); PTHR22803:SF16 (PANTHER); IPR018378 (PROSITE_PATTERNS); IPR016187 (SUPERFAMILY)                                                                                                                                    |
| 430 | 206035_length_298_cvg_5.0_tip_1_2 | 16 | peptidyl-prolyl cis-trans isomerase d                       | 99  | 4.09E-21 | 67.90% | 0.121   | Coil (COILS); IPR019734 (SMART); IPR011990 (G3DSA:1.25.40.GENE3D); PF13414 (PFAM); IPR023566 (PANTHER); IPR019734 (PROSITE_PROFILES); IPR019734 (PROSITE_PROFILES); IPR013026 (PROSITE_PROFILES); SSF48452 (SUPERFAMILY)                                                                                                        |
| 431 | 206209_length_298_cvg_3.8_tip_1_2 | 10 | peptidyl-prolyl cis-trans isomerase nima-interacting 1-like | 99  | 4.75E-39 | 91.90% | 0.101   | IPR000297 (PFAM); G3DSA:3.10.50.40 (GENE3D); PTHR10657 (PANTHER); IPR023058 (PROSITE_PATTERNS); IPR000297 (PROSITE_PROFILES); SSF54534 (SUPERFAMILY)                                                                                                                                                                            |
| 432 | 206401_length_298_cvg_3.0_tip_1_5 | 12 | zinc finger protein 525-like                                | 99  | 8.32E-14 | 57.60% | 0.121   | IPR015880 (SMART); PF13894 (PFAM); PF13465 (PFAM); IPR013087 (G3DSA:3.30.160.GENE3D); PTHR24409 (PANTHER); PTHR24409:SF14 (PANTHER); IPR007087 (PROSITE_PATTERNS); IPR007087 (PROSITE_PATTERNS); IPR007087 (PROSITE_PROFILES); IPR007087 (PROSITE_PROFILES); SSF57667 (SUPERFAMILY); SSF57667 (SUPERFAMILY)                     |
| 433 | 206523_length_299_cvg_2.0_tip_1_5 | 6  | ring finger and spry domain-containing protein 1-like       | 99  | 1.00E-38 | 80.50% | 0.098   | PTHR13363 (PANTHER)                                                                                                                                                                                                                                                                                                             |
| 434 | 206945_length_299_cvg_2.0_tip_1_5 | 5  | low-density lipoprotein                                     | 99  | 3.95E-27 | 65.70% | 0.133   | IPR002172 (PRINTS); IPR002172 (SMART); IPR002172 (G3DSA:4.10.400.GENE3D); IPR002172 (PFAM); PTHR10529 (PANTHER); IPR023415 (PROSITE_PATTERNS); IPR023415 (PROSITE_PATTERNS); IPR002172 (PROSITE_PROFILES); IPR002172 (PROSITE_PROFILES); IPR002172 (SUPERFAMILY); IPR002172 (SUPERFAMILY)                                       |
| 435 | 207021_length_300_cvg_3.9_tip_1_2 | 12 | zinc finger protein 629 isoform x1                          | 100 | 9.63E-25 | 78.20% | 0.102   | IPR015880 (SMART); PF13465 (PFAM); IPR013087 (G3DSA:3.30.160.GENE3D); IPR013087 (G3DSA:3.30.160.GENE3D); PTHR23223 (PANTHER); PTHR23223:SF130 (PANTHER); IPR007087 (PROSITE_PATTERNS); IPR007087 (PROSITE_PATTERNS); IPR007087 (PROSITE_PROFILES); IPR007087 (PROSITE_PROFILES); SSF57667 (SUPERFAMILY)                         |
| 436 | 207225_length_300_cvg_3.0_tip_1_3 | 10 | melanoma-associated antigen e1- partial                     | 100 | 2.66E-15 | 65.60% | 0.142   | SignalP-TM (SIGNALP_GRAM_POSITIVE)                                                                                                                                                                                                                                                                                              |
| 437 | 207615_length_301_cvg_4.0_tip_1_2 | 13 | xanthine dehydrogenase isoform x1                           | 100 | 2.17E-26 | 74.30% | 0.099   | IPR000674 (PFAM); IPR000674 (G3DSA:3.90.1170.GENE3D); PTHR11908 (PANTHER); PTHR11908:SF32 (PANTHER); IPR000674 (SUPERFAMILY)                                                                                                                                                                                                    |
| 438 | 208039_length_302_cvg_5.0_tip_1_5 | 18 | collagen alpha-5 chain-like                                 | 100 | 2.36E-06 | 69.00% | 0.131   | CYTOPLASMIC_DOMAIN (PHOBIUS); NON_CYTOPLASMIC_DOMAIN (PHOBIUS); TRANSMEMBRANE (PHOBIUS); TMhelix (TMHMM)                                                                                                                                                                                                                        |
| 439 | 208073_length_302_cvg_2.0_tip_1_2 | 5  | lysosomal alpha-glucosidase-like                            | 100 | 3.34E-55 | 89.40% | 0.147   | IPR000322 (PFAM); PTHR22762:SF7 (PANTHER); PTHR22762 (PANTHER); IPR030459 (PROSITE_PATTERNS); IPR017853 (SUPERFAMILY)                                                                                                                                                                                                           |
| 441 | 208365_length_302_cvg_3.0_tip_1_5 | 8  | fukutin-related protein                                     | 100 | 3.27E-09 | 62.40% | 0.098   | no IPS match                                                                                                                                                                                                                                                                                                                    |

|     |                                    |      |                                                                                                                      |     |          |        |         |                                                                                                                                                                                                                                                                                                                                                                                                                                                                               |
|-----|------------------------------------|------|----------------------------------------------------------------------------------------------------------------------|-----|----------|--------|---------|-------------------------------------------------------------------------------------------------------------------------------------------------------------------------------------------------------------------------------------------------------------------------------------------------------------------------------------------------------------------------------------------------------------------------------------------------------------------------------|
| 440 | 208273_length_302_cvg_9.0_tip_1_0  | 26   | group iii secreted phospholipase                                                                                     | 101 | 1.96E-21 | 60.10% | 0.137   | IPR001211 (PFAM); IPR016090 (G3DSA:1.20.90.GENE3D); PTHR12253 (PANTHER); IPR016090 (SUPERFAMILY)                                                                                                                                                                                                                                                                                                                                                                              |
| 442 | 208379_length_302_cvg_3.0_tip_1_0  | 9    | serine protease                                                                                                      | 101 | 1.29E-18 | 60.60% | 0.101   | IPR001254 (PFAM); G3DSA:2.40.10.10 (GENE3D); PTHR24268 (PANTHER); IPR001254 (PROSITE_PROFILES); IPR009003 (SUPERFAMILY)                                                                                                                                                                                                                                                                                                                                                       |
| 443 | 208419_length_303_cvg_38.8_tip_1_0 | 112  | actin-depolymerizing factor                                                                                          | 101 | 5.92E-37 | 75.10% | 0.102   | IPR007122 (PRINTS); IPR007122 (SMART); IPR029006 (G3DSA:3.40.20.GENE3D); IPR007123 (PFAM); IPR007122 (PANTHER); SSF55753 (SUPERFAMILY)                                                                                                                                                                                                                                                                                                                                        |
| 444 | 208669_length_303_cvg_3.0_tip_1_2  | 9    | zinc finger protein                                                                                                  | 101 | 1.39E-59 | 95.30% | 0.105   | IPR015880 (SMART); IPR013087 (G3DSA:3.30.160.GENE3D); IPR013087 (G3DSA:3.30.160.GENE3D); IPR007087 (PFAM); PF13465 (PFAM); IPR013087 (G3DSA:3.30.160.GENE3D); PTHR23228:SF26 (PANTHER); PTHR23228 (PANTHER); IPR007087 (PROSITE_PATTERNS); IPR007087 (PROSITE_PATTERNS); IPR007087 (PROSITE_PATTERNS); IPR007087 (PROSITE_PROFILES); IPR007087 (PROSITE_PROFILES); IPR007087 (PROSITE_PROFILES); IPR007087 (PROSITE_PROFILES); SSF57667 (SUPERFAMILY); SSF57667 (SUPERFAMILY) |
| 445 | 208755_length_303_cvg_2.0_tip_1_0  | 6    | cd4-specific ankyrin repeat protein                                                                                  | 101 | 1.53E-15 | 54.30% | 0.103   | IPR002110 (SMART); IPR020683 (G3DSA:1.25.40.GENE3D); IPR020683 (PFAM); PTHR24198 (PANTHER); IPR002110 (PROSITE_PROFILES); IPR002110 (PROSITE_PROFILES); IPR002110 (PROSITE_PROFILES); IPR020683 (PROSITE_PROFILES); IPR020683 (SUPERFAMILY)                                                                                                                                                                                                                                   |
| 446 | 208879_length_304_cvg_88.6_tip_0_3 | 1828 | kazal-type serine proteinase inhibitor 4                                                                             | 102 | 8.63E-10 | 53.30% | 0.108   | IPR002350 (SMART); IPR002350 (PFAM); G3DSA:3.30.60.30 (GENE3D); IPR002350 (PROSITE_PROFILES); IPR002350 (PROSITE_PROFILES); SSF100895 (SUPERFAMILY); SSF100895 (SUPERFAMILY)                                                                                                                                                                                                                                                                                                  |
| 447 | 209385_length_305_cvg_2.0_tip_1_0  | 7    | angiogenic factor with g patch and fha domains 1-like                                                                | 102 | 4.46E-14 | 63.00% | 0.118   | no IPS match                                                                                                                                                                                                                                                                                                                                                                                                                                                                  |
| 448 | 209417_length_305_cvg_2.0_tip_1_1  | 3    | zinc finger protein 239- partial                                                                                     | 102 | 2.99E-19 | 60.20% | 0.107   | IPR015880 (SMART); IPR013087 (G3DSA:3.30.160.GENE3D); IPR013087 (G3DSA:3.30.160.GENE3D); PF13465 (PFAM); IPR013087 (G3DSA:3.30.160.GENE3D); IPR013087 (G3DSA:3.30.160.GENE3D); PTHR24409 (PANTHER); IPR007087 (PROSITE_PATTERNS); IPR007087 (PROSITE_PATTERNS); IPR007087 (PROSITE_PROFILES); IPR007087 (PROSITE_PROFILES); IPR007087 (PROSITE_PROFILES); IPR007087 (PROSITE_PROFILES); SSF57667 (SUPERFAMILY); SSF57667 (SUPERFAMILY)                                        |
| 449 | 210005_length_306_cvg_5.0_tip_1_3  | 18   | peptidyl-prolyl cis-trans isomerase-like                                                                             | 102 | 3.98E-39 | 86.50% | 0.612 Y | IPR002130 (PRINTS); IPR029000 (G3DSA:2.40.100.GENE3D); IPR002130 (PFAM); IPR024936 (PANTHER); IPR0020892 (PROSITE_PATTERNS); IPR002130 (PROSITE_PROFILES); SignalP-noTM (SIGNALP_EUK); IPR029000 (SUPERFAMILY)                                                                                                                                                                                                                                                                |
| 450 | 210057_length_306_cvg_4.0_tip_1_2  | 12   | carboxypeptidase b-like                                                                                              | 102 | 2.53E-12 | 54.70% | 0.1     | IPR003146 (PFAM); IPR003146 (G3DSA:3.30.70.GENE3D); PTHR11705 (PANTHER); IPR009020 (SUPERFAMILY)                                                                                                                                                                                                                                                                                                                                                                              |
| 451 | 210063_length_306_cvg_7.0_tip_1_1  | 27   | very low-density lipoprotein receptor-like                                                                           | 102 | 1.11E-09 | 53.90% | 0.114   | IPR002172 (SMART); IPR002172 (PFAM); G3DSA:4.10.1220.10 (GENE3D); IPR002172 (G3DSA:4.10.400.GENE3D); IPR002172 (PROSITE_PROFILES); IPR002172 (SUPERFAMILY)                                                                                                                                                                                                                                                                                                                    |
| 452 | 210285_length_307_cvg_2.0_tip_1_1  | 4    | carboxypeptidase d-like                                                                                              | 102 | 8.26E-16 | 71.50% | 0.143   | IPR000834 (PFAM); G3DSA:3.40.630.10 (GENE3D); SSF53187 (SUPERFAMILY)                                                                                                                                                                                                                                                                                                                                                                                                          |
| 453 | 210557_length_307_cvg_2.0_tip_1_4  | 6    | polypeptide n-acetylgalactosaminyltransferase 5 isoform x2                                                           | 102 | 1.87E-45 | 82.40% | 0.1     | IPR000772 (SMART); G3DSA:2.80.10.50 (GENE3D); IPR000772 (PFAM); PTHR11675:SF39 (PANTHER); PTHR11675 (PANTHER); IPR000772 (PROSITE_PROFILES); IPR000772 (SUPERFAMILY)                                                                                                                                                                                                                                                                                                          |
| 455 | 210767_length_308_cvg_3.7_tip_1_2  | 13   | vesicle-fusing atpase 1-like                                                                                         | 102 | 8.38E-32 | 76.40% | 0.122   | IPR003338 (SMART); G3DSA:2.40.40.20 (GENE3D); IPR003338 (PFAM); PTHR23078 (PANTHER); SignalP-TM (SIGNALP_GRAM_POSITIVE); IPR009010 (SUPERFAMILY)                                                                                                                                                                                                                                                                                                                              |
| 456 | 210841_length_308_cvg_3.0_tip_1_2  | 10   | aqp_aedae ame: full=aquaporin                                                                                        | 102 | 4.97E-20 | 70.00% | 0.242   | IPR000425 (PRINTS); IPR023271 (G3DSA:1.20.1080.GENE3D); IPR000425 (PFAM); IPR000425 (PANTHER); PTHR19139:SF45 (PANTHER); IPR022357 (PROSITE_PATTERNS); CYTOPLASMIC_DOMAIN (PHOBIUS); NON_CYTOPLASMIC_DOMAIN (PHOBIUS); TRANSMEMBRANE (PHOBIUS); NON_CYTOPLASMIC_DOMAIN (PHOBIUS); TRANSMEMBRANE (PHOBIUS); IPR023271 (SUPERFAMILY); TMhelix (TMHMM); TMhelix (TMHMM)                                                                                                          |
| 454 | 210689_length_307_cvg_7.0_tip_1_3  | 14   | heat shock protein partial                                                                                           | 103 | 7.78E-55 | 90.10% | 0.101   | G3DSA:3.30.30.30 (GENE3D); IPR013126 (PFAM); G3DSA:3.30.420.40 (GENE3D); PTHR19375 (PANTHER); PTHR19375:SF142 (PANTHER); SSF53067 (SUPERFAMILY)                                                                                                                                                                                                                                                                                                                               |
| 457 | 210867_length_308_cvg_15.7_tip_1_3 | 59   | huga_polan ame: full=hyaluronidase short=hya ame: full=hyaluronoglucosaminidase ame: allergen=pol a 2 flags: partial | 103 | 1.14E-09 | 61.10% | 0.366 Y | IPR013785 (G3DSA:3.20.20.GENE3D); IPR018155 (PFAM); TRANSMEMBRANE (PHOBIUS); CYTOPLASMIC_DOMAIN (PHOBIUS); NON_CYTOPLASMIC_DOMAIN (PHOBIUS); IPR017853 (SUPERFAMILY); TMhelix (TMHMM)                                                                                                                                                                                                                                                                                         |
| 458 | 210911_length_308_cvg_8.6_tip_1_4  | 27   | folistatin-related protein 5-like                                                                                    | 103 | 7.23E-50 | 83.80% | 0.107   | PTHR10913 (PANTHER); PTHR10913:SF14 (PANTHER)                                                                                                                                                                                                                                                                                                                                                                                                                                 |
| 459 | 211137_length_308_cvg_3.6_tip_1_0  | 9    | reticulocalbin-2-like isoform x1                                                                                     | 103 | 1.85E-32 | 75.30% | 0.104   | IPR002048 (SMART); IPR011992 (G3DSA:1.10.238.GENE3D); IPR011992 (PFAM); PTHR10827:SF48 (PANTHER); PTHR10827 (PANTHER); IPR018247 (PROSITE_PATTERNS); IPR018247 (PROSITE_PATTERNS); IPR002048 (PROSITE_PROFILES); IPR002048 (PROSITE_PROFILES); SSF47473 (SUPERFAMILY)                                                                                                                                                                                                         |

|     |                                    |    |                                                                                        |     |          |        |       |                                                                                                                                                                                                                                                                                                                                                                                                    |
|-----|------------------------------------|----|----------------------------------------------------------------------------------------|-----|----------|--------|-------|----------------------------------------------------------------------------------------------------------------------------------------------------------------------------------------------------------------------------------------------------------------------------------------------------------------------------------------------------------------------------------------------------|
| 460 | 211175_length_308_cvg_5.1_tip_1_4  | 16 | vitellogenic carboxypeptidase                                                          | 103 | 6.49E-33 | 73.60% | 0.108 | IPR001563 (PRINTS); IPR029058 (G3DSA:3.40.50.GENE3D); IPR001563 (PFAM); IPR001563 (PANTHER); IPR029058 (SUPERFAMILY)                                                                                                                                                                                                                                                                               |
| 461 | 211267_length_309_cvg_2.0_tip_1_1  | 6  | dna polymerase alpha catalytic subunit                                                 | 103 | 8.26E-28 | 71.00% | 0.119 | IPR000101 (PRINTS); IPR000101 (PFAM); IPR000101 (PANTHER); PTHR11686:SF18 (PANTHER); IPR029055 (SUPERFAMILY); TMhelix (TMHMM)                                                                                                                                                                                                                                                                      |
| 462 | 211443_length_309_cvg_11.0_tip_1_2 | 30 | cd109 antigen                                                                          | 103 | 3.47E-32 | 74.20% | 0.137 | IPR011625 (PFAM); PTHR11412 (PANTHER); PTHR11412:SF84 (PANTHER)                                                                                                                                                                                                                                                                                                                                    |
| 463 | 211605_length_309_cvg_3.0_tip_1_1  | 10 | neuroigin- y-linked isoform x1                                                         | 103 | 6.47E-46 | 84.60% | 0.142 | IPR029058 (G3DSA:3.40.50.GENE3D); IPR002018 (PFAM); PTHR11559 (PANTHER); PTHR11559:SF157 (PANTHER); TRANSMEMBRANE (PHOBIUS); NON_CYTOPLASMIC_DOMAIN (PHOBIUS); CYTOPLASMIC_DOMAIN (PHOBIUS); IPR029058 (SUPERFAMILY)                                                                                                                                                                               |
| 464 | 211607_length_309_cvg_2.0_tip_1_0  | 6  | lactose-binding lectin I-2-like                                                        | 103 | 5.08E-10 | 58.60% | 0.111 | IPR001304 (PFAM); IPR016186 (G3DSA:3.10.100.GENE3D); IPR001304 (PROSITE_PROFILES); IPR016187 (SUPERFAMILY)                                                                                                                                                                                                                                                                                         |
| 465 | 211609_length_309_cvg_2.4_tip_1_5  | 12 | mitochondrial cardiolipin hydrolase                                                    | 103 | 5.35E-37 | 70.80% | 0.122 | G3DSA:3.30.870.10 (GENE3D); IPR025202 (PFAM); PTHR21248 (PANTHER); IPR001736 (PROSITE_PROFILES); SSF56024 (SUPERFAMILY)                                                                                                                                                                                                                                                                            |
| 466 | 212195_length_311_cvg_2.0_tip_1_2  | 6  | fez family zinc finger protein 2                                                       | 103 | 6.26E-61 | 95.80% | 0.121 | IPR015880 (SMART); IPR007087 (PFAM); PF13465 (PFAM); IPR013087 (G3DSA:3.30.160.GENE3D); PF13912 (PFAM); IPR013087 (G3DSA:3.30.160.GENE3D); PTHR24409 (PANTHER); IPR007087 (PROSITE_PATTERNS); IPR007087 (PROSITE_PATTERNS); IPR007087 (PROSITE_PROFILES); IPR007087 (PROSITE_PATTERNS); IPR007087 (PROSITE_PROFILES); IPR007087 (PROSITE_PROFILES); SSF57667 (SUPERFAMILY); SSF57667 (SUPERFAMILY) |
| 467 | 212245_length_311_cvg_2.0_tip_1_1  | 4  | hindsight transcription factor-like protein                                            | 104 | 5.24E-50 | 86.20% | 0.11  | IPR015880 (SMART); PF13894 (PFAM); IPR013087 (G3DSA:3.30.160.GENE3D); PF13465 (PFAM); IPR013087 (G3DSA:3.30.160.GENE3D); PTHR23233:SF42 (PANTHER); PTHR23233 (PANTHER); IPR007087 (PROSITE_PATTERNS); IPR007087 (PROSITE_PATTERNS); IPR007087 (PROSITE_PROFILES); IPR007087 (PROSITE_PROFILES); SSF57667 (SUPERFAMILY); SSF57667 (SUPERFAMILY)                                                     |
| 468 | 212339_length_311_cvg_2.1_tip_1_4  | 6  | macrophage mannose receptor 1-like                                                     | 104 | 1.28E-13 | 51.90% | 0.159 | IPR016186 (G3DSA:3.10.100.GENE3D); IPR001304 (PFAM); PTHR22803:SF16 (PANTHER); PTHR22803 (PANTHER); IPR001304 (PROSITE_PROFILES); IPR016187 (SUPERFAMILY)                                                                                                                                                                                                                                          |
| 469 | 212991_length_312_cvg_2.0_tip_1_1  | 6  | low quality protein: zinc finger protein 665                                           | 104 | 3.61E-23 | 67.40% | 0.101 | IPR015880 (SMART); PF13465 (PFAM); IPR007087 (PFAM); IPR013087 (G3DSA:3.30.160.GENE3D); IPR013087 (G3DSA:3.30.160.GENE3D); PTHR24409:SF14 (PANTHER); PTHR24409 (PANTHER); IPR007087 (PROSITE_PATTERNS); IPR007087 (PROSITE_PATTERNS); IPR007087 (PROSITE_PROFILES); IPR007087 (PROSITE_PROFILES); IPR007087 (PROSITE_PROFILES); SSF57667 (SUPERFAMILY); SSF57667 (SUPERFAMILY)                     |
| 470 | 213125_length_313_cvg_2.0_tip_1_4  | 9  | partial                                                                                | 104 | 1.12E-11 | 52.10% | 0.155 | IPR000372 (SMART); G3DSA:3.80.10.10 (GENE3D); IPR000372 (PFAM)                                                                                                                                                                                                                                                                                                                                     |
| 471 | 213149_length_313_cvg_2.0_tip_1_4  | 6  | hypothetical protein                                                                   | 104 | 7.98E-13 | 61.20% | 0.101 | G3DSA:1.20.120.20 (GENE3D); SSF47162 (SUPERFAMILY)                                                                                                                                                                                                                                                                                                                                                 |
| 472 | 213357_length_313_cvg_2.1_tip_1_1  | 12 | cubilin                                                                                | 104 | 1.01E-19 | 60.00% | 0.155 | IPR000859 (G3DSA:2.60.120.GENE3D); IPR000859 (PFAM); PTHR10127 (PANTHER); IPR000859 (PROSITE_PROFILES); IPR000859 (PROSITE_PROFILES); IPR000859 (SUPERFAMILY); IPR000859 (SUPERFAMILY)                                                                                                                                                                                                             |
| 473 | 213497_length_314_cvg_4.0_tip_1_2  | 14 | adiponectin receptor protein                                                           | 104 | 6.58E-41 | 90.20% | 0.307 | IPR004254 (PFAM); IPR004254 (PANTHER); PTHR20855:SF15 (PANTHER); CYTOPLASMIC_DOMAIN (PHOBIUS); NON_CYTOPLASMIC_DOMAIN (PHOBIUS); TRANSMEMBRANE (PHOBIUS); TRANSMEMBRANE (PHOBIUS); TRANSMEMBRANE (PHOBIUS); NON_CYTOPLASMIC_DOMAIN (PHOBIUS); CYTOPLASMIC_DOMAIN (PHOBIUS); TMhelix (TMHMM); TMhelix (TMHMM)                                                                                       |
| 474 | 213513_length_314_cvg_4.7_tip_1_1  | 6  | achain crystal structure of engineered northeast structural genomics consortium target | 105 | 7.53E-16 | 60.60% | 0.099 | IPR002110 (SMART); IPR020683 (PFAM); IPR020683 (G3DSA:1.25.40.GENE3D); PTHR24193 (PANTHER); IPR002110 (PROSITE_PROFILES); IPR020683 (PROSITE_PROFILES); IPR002110 (PROSITE_PROFILES); IPR020683 (SUPERFAMILY)                                                                                                                                                                                      |
| 475 | 213531_length_314_cvg_2.0_tip_1_0  | 7  | epidermal growth factor receptor                                                       | 105 | 3.10E-39 | 77.80% | 0.101 | IPR000494 (G3DSA:3.80.20.GENE3D); IPR000494 (PFAM); PTHR24416 (PANTHER); PTHR24416:SF88 (PANTHER); SSF52058 (SUPERFAMILY)                                                                                                                                                                                                                                                                          |
| 476 | 213597_length_314_cvg_2.3_tip_1_1  | 8  | beta- -galactosyltransferase 3-like                                                    | 105 | 3.72E-38 | 72.10% | 0.126 | IPR003859 (PRINTS); IPR027995 (PFAM); IPR029044 (G3DSA:3.90.550.GENE3D); IPR003859 (PANTHER); IPR029044 (SUPERFAMILY)                                                                                                                                                                                                                                                                              |
| 477 | 213665_length_314_cvg_3.0_tip_1_4  | 8  | inversin protein                                                                       | 105 | 7.73E-42 | 80.00% | 0.141 | IPR002110 (SMART); IPR002110 (PFAM); IPR020683 (G3DSA:1.25.40.GENE3D); IPR020683 (PFAM); PTHR24178 (PANTHER); IPR020683 (PROSITE_PROFILES); IPR002110 (PROSITE_PROFILES); IPR002110 (PROSITE_PROFILES); IPR020683 (SUPERFAMILY)                                                                                                                                                                    |

|     |                                    |      |                                                                                                                                                                            |     |          |        |       |                                                                                                                                                                                                                                                                                                                                                                                                          |
|-----|------------------------------------|------|----------------------------------------------------------------------------------------------------------------------------------------------------------------------------|-----|----------|--------|-------|----------------------------------------------------------------------------------------------------------------------------------------------------------------------------------------------------------------------------------------------------------------------------------------------------------------------------------------------------------------------------------------------------------|
| 478 | 213687_length_314_cvg_3.0_tip_1_1  | 10   | zinc finger protein 316-like isoform x2                                                                                                                                    | 105 | 1.28E-15 | 61.40% | 0.101 | IPR015880 (SMART); IPR013087 (G3DSA:3.30.160.GENE3D); PF13465 (PFAM); PF13894 (PFAM); IPR013087 (G3DSA:3.30.160.GENE3D); PTHR24409 (PANTHER); IPR007087 (PROSITE_PATTERNS); IPR007087 (PROSITE_PATTERNS); IPR007087 (PROSITE_PROFILES); IPR007087 (PROSITE_PROFILES); IPR007087 (PROSITE_PROFILES); SSF57667 (SUPERFAMILY); SSF57667 (SUPERFAMILY)                                                       |
| 479 | 213955_length_315_cvg_3.0_tip_1_2  | 9    | lipophorin receptor                                                                                                                                                        | 105 | 1.63E-54 | 88.40% | 0.261 | IPR000033 (SMART); IPR000033 (PFAM); IPR011042 (G3DSA:2.120.10.GENE3D); PTHR10529:SF208 (PANTHER); PTHR10529 (PANTHER); IPR000033 (PROSITE_PROFILES); IPR000033 (PROSITE_PROFILES); IPR000033 (PROSITE_PROFILES); SSF63825 (SUPERFAMILY)                                                                                                                                                                 |
| 480 | 214523_length_316_cvg_2.9_tip_1_2  | 13   | tryptase-like isoform x1                                                                                                                                                   | 105 | 1.21E-31 | 75.20% | 0.193 | G3DSA:2.40.10.10 (GENE3D); IPR001254 (PFAM); PTHR24268 (PANTHER); PTHR24268:SF95 (PANTHER); IPR001254 (PROSITE_PROFILES); IPR009003 (SUPERFAMILY)                                                                                                                                                                                                                                                        |
| 481 | 214607_length_316_cvg_2.0_tip_1_1  | 7    | protein flightless-1                                                                                                                                                       | 105 | 1.64E-46 | 83.10% | 0.123 | IPR029006 (G3DSA:3.40.20.GENE3D); IPR007123 (PFAM); IPR029006 (G3DSA:3.40.20.GENE3D); IPR007122 (PANTHER); IPR029919 (PTHR11977:PANTHER); SSF55753 (SUPERFAMILY); SSF55753 (SUPERFAMILY)                                                                                                                                                                                                                 |
| 482 | 214615_length_316_cvg_2.0_tip_1_4  | 6    | c-type lectin domain family 4 member e-like                                                                                                                                | 105 | 9.66E-12 | 54.30% | 0.106 | IPR001304 (PFAM); IPR016186 (G3DSA:3.10.100.GENE3D); PTHR22802:SF216 (PANTHER); PTHR22802 (PANTHER); IPR001304 (PROSITE_PROFILES); IPR016187 (SUPERFAMILY)                                                                                                                                                                                                                                               |
| 483 | 214669_length_316_cvg_2.0_tip_1_2  | 8    | zinc finger protein 271 (zinc finger protein 7) (zinc finger protein znfphe133) (epstein-barr virus-induced zinc finger protein) (znf-eb) (ct-zfp48) (zinc finger protein) | 105 | 4.29E-20 | 64.60% | 0.1   | IPR015880 (SMART); IPR013087 (G3DSA:3.30.160.GENE3D); IPR013087 (G3DSA:3.30.160.GENE3D); PF13894 (PFAM); PF13465 (PFAM); PTHR24409 (PANTHER); IPR007087 (PROSITE_PATTERNS); IPR007087 (PROSITE_PATTERNS); IPR007087 (PROSITE_PROFILES); IPR007087 (PROSITE_PROFILES); IPR007087 (PROSITE_PROFILES); SSF57667 (SUPERFAMILY); SSF57667 (SUPERFAMILY)                                                       |
| 484 | 214687_length_316_cvg_2.0_tip_1_2  | 7    | mam domain-containing glycosylphosphatidylinositol anchor protein 1                                                                                                        | 105 | 2.49E-14 | 58.20% | 0.102 | IPR000998 (PRINTS); IPR000998 (PFAM); PTHR23282 (PANTHER); IPR000998 (PROSITE_PROFILES); IPR013320 (SUPERFAMILY)                                                                                                                                                                                                                                                                                         |
| 485 | 214699_length_316_cvg_4.0_tip_1_4  | 11   | lachesin-like isoform x1                                                                                                                                                   | 105 | 3.18E-49 | 83.90% | 0.099 | IPR013783 (G3DSA:2.60.40.GENE3D); IPR013106 (PFAM); IPR013098 (PFAM); PTHR19831:SF43 (PANTHER); PTHR19831 (PANTHER); IPR007110 (PROSITE_PROFILES); SSF48726 (SUPERFAMILY); SSF48726 (SUPERFAMILY)                                                                                                                                                                                                        |
| 486 | 214833_length_317_cvg_48.0_tip_1_2 | 200  | serine protease                                                                                                                                                            | 105 | 3.89E-15 | 72.40% | 0.121 | G3DSA:2.40.10.10 (GENE3D); IPR001254 (PFAM); PTHR24256 (PANTHER); IPR001254 (PROSITE_PROFILES); IPR009003 (SUPERFAMILY)                                                                                                                                                                                                                                                                                  |
| 487 | 214877_length_317_cvg_2.0_tip_1_5  | 6    | tyrosine-protein phosphatase non-receptor type 9-like                                                                                                                      | 105 | 1.54E-47 | 84.30% | 0.099 | IPR000242 (PRINTS); IPR029021 (G3DSA:3.90.190.GENE3D); IPR000242 (PFAM); PTHR19134 (PANTHER); PTHR19134:SF232 (PANTHER); IPR000242 (PROSITE_PROFILES); IPR029021 (SUPERFAMILY)                                                                                                                                                                                                                           |
| 488 | 215163_length_317_cvg_2.0_tip_1_4  | 8    | zinc finger protein                                                                                                                                                        | 106 | 7.15E-16 | 55.70% | 0.099 | IPR015880 (SMART); IPR013087 (G3DSA:3.30.160.GENE3D); PF13465 (PFAM); IPR013087 (G3DSA:3.30.160.GENE3D); IPR013087 (G3DSA:3.30.160.GENE3D); PTHR24409 (PANTHER); PTHR24409:SF14 (PANTHER); IPR007087 (PROSITE_PATTERNS); IPR007087 (PROSITE_PATTERNS); IPR007087 (PROSITE_PROFILES); IPR007087 (PROSITE_PROFILES); IPR007087 (PROSITE_PROFILES); SSF57667 (SUPERFAMILY); SSF57667 (SUPERFAMILY)          |
| 489 | 215167_length_317_cvg_4.2_tip_1_0  | 16   | cysteine proteinase cg12163                                                                                                                                                | 106 | 2.13E-59 | 91.00% | 0.107 | G3DSA:3.90.70.10 (GENE3D); IPR000668 (PFAM); PTHR12411:SF316 (PANTHER); IPR013128 (PANTHER); IPR025660 (PROSITE_PATTERNS); SSF54001 (SUPERFAMILY)                                                                                                                                                                                                                                                        |
| 490 | 215261_length_317_cvg_3.0_tip_1_1  | 9    | glycoside hydrolase family 1                                                                                                                                               | 106 | 1.04E-30 | 80.20% | 0.109 | IPR013781 (G3DSA:3.20.20.GENE3D); IPR001360 (PFAM); IPR001360 (PANTHER); IPR018120 (PROSITE_PATTERNS); IPR017853 (SUPERFAMILY)                                                                                                                                                                                                                                                                           |
| 491 | 215343_length_318_cvg_2.0_tip_1_3  | 9    | insulin-like growth factor-binding protein complex acid labile subunit                                                                                                     | 106 | 2.28E-18 | 62.60% | 0.116 | IPR003591 (SMART); G3DSA:3.80.10.10 (GENE3D); IPR001611 (PFAM); IPR001611 (PFAM); PTHR24365 (PANTHER); SSF52058 (SUPERFAMILY)                                                                                                                                                                                                                                                                            |
| 492 | 215355_length_318_cvg_2.0_tip_1_3  | 7    | group xv phospholipase a2-like                                                                                                                                             | 106 | 7.02E-34 | 69.90% | 0.126 | PTHR11440:SF47 (PANTHER); PTHR11440 (PANTHER)                                                                                                                                                                                                                                                                                                                                                            |
| 493 | 215401_length_318_cvg_2.6_tip_1_1  | 12   | zinc finger protein 358                                                                                                                                                    | 106 | 1.21E-21 | 60.10% | 0.127 | IPR015880 (SMART); IPR013087 (G3DSA:3.30.160.GENE3D); IPR013087 (G3DSA:3.30.160.GENE3D); PF13465 (PFAM); IPR013087 (G3DSA:3.30.160.GENE3D); IPR013087 (G3DSA:3.30.160.GENE3D); PTHR24409 (PANTHER); IPR007087 (PROSITE_PATTERNS); IPR007087 (PROSITE_PATTERNS); IPR007087 (PROSITE_PROFILES); IPR007087 (PROSITE_PROFILES); IPR007087 (PROSITE_PROFILES); SSF57667 (SUPERFAMILY); SSF57667 (SUPERFAMILY) |
| 494 | 215779_length_319_cvg_87.0_tip_1_4 | 3019 | protein npc2 homolog                                                                                                                                                       | 106 | 3.72E-09 | 67.00% | 0.109 | IPR003172 (PFAM); IPR003172 (G3DSA:2.60.40.GENE3D); PTHR11306 (PANTHER); PTHR11306:SF3 (PANTHER); IPR014756 (SUPERFAMILY)                                                                                                                                                                                                                                                                                |
| 495 | 215921_length_319_cvg_4.0_tip_1_2  | 12   | leucine-rich repeat-containing protein 70 isoform x1                                                                                                                       | 106 | 6.55E-13 | 57.90% | 0.104 | IPR003591 (SMART); IPR001611 (PFAM); IPR001611 (PFAM); G3DSA:3.80.10.10 (GENE3D); PTHR24365 (PANTHER); SSF52058 (SUPERFAMILY)                                                                                                                                                                                                                                                                            |
| 496 | 216109_length_319_cvg_2.5_tip_1_1  | 7    | extensin-like protein:near transporter                                                                                                                                     | 106 | 1.43E-17 | 72.90% | 0.125 | no IPS match                                                                                                                                                                                                                                                                                                                                                                                             |



|     |                                    |      |                                                                                                                                                                                |     |          |        |       |                                                                                                                                                                                                                                                                                                                                                                                              |
|-----|------------------------------------|------|--------------------------------------------------------------------------------------------------------------------------------------------------------------------------------|-----|----------|--------|-------|----------------------------------------------------------------------------------------------------------------------------------------------------------------------------------------------------------------------------------------------------------------------------------------------------------------------------------------------------------------------------------------------|
| 499 | 216281_length_320_cvg_3.0_tip_1_5  | 9    | ecdysteroid-regulated 16 kda                                                                                                                                                   | 106 | 1.18E-25 | 73.80% | 0.132 | IPR003172 (G3DSA:2.60.40.GENE3D); IPR003172 (PFAM); PTHR11306:SF0 (PANTHER); PTHR11306 (PANTHER); IPR014756 (SUPERFAMILY)                                                                                                                                                                                                                                                                    |
| 497 | 216143_length_319_cvg_4.0_tip_1_3  | 13   | neuroendocrine convertase 2                                                                                                                                                    | 107 | 6.37E-65 | 97.50% | 0.102 | IPR000209 (PFAM); IPR000209 (G3DSA:3.40.50.GENE3D); PTHR10795:SF11 (PANTHER); IPR015500 (PANTHER); IPR022398 (PROSITE_PATTERNS); IPR000209 (SUPERFAMILY)                                                                                                                                                                                                                                     |
| 498 | 216157_length_320_cvg_2.0_tip_1_1  | 8    | zinc finger protein 665-like isoform x1                                                                                                                                        | 107 | 3.72E-16 | 62.10% | 0.116 | IPR015880 (SMART); IPR013087 (G3DSA:3.30.160.GENE3D); PF13465 (PFAM); IPR013087 (G3DSA:3.30.160.GENE3D); PTHR24409 (PANTHER); IPR007087 (PROSITE_PATTERNS); IPR007087 (PROSITE_PATTERNS); IPR007087 (PROSITE_PROFILES); IPR007087 (PROSITE_PROFILES); SSF57667 (SUPERFAMILY)                                                                                                                 |
| 500 | 216465_length_320_cvg_3.0_tip_1_0  | 8    | neurogenic locus notch homolog protein 1 isoform x1                                                                                                                            | 107 | 6.77E-29 | 78.50% | 0.099 | IPR008197 (PRINTS); IPR008197 (SMART); IPR008197 (G3DSA:4.10.75.GENE3D); IPR008197 (PFAM); PTHR19441 (PANTHER); PTHR19441:SF10 (PANTHER); IPR008197 (PROSITE_PROFILES); IPR008197 (SUPERFAMILY)                                                                                                                                                                                              |
| 501 | 216589_length_320_cvg_2.0_tip_1_0  | 8    | transmembrane protease serine partial                                                                                                                                          | 107 | 1.44E-19 | 69.10% | 0.228 | IPR001254 (PFAM); G3DSA:2.40.10.10 (GENE3D); PTHR24268 (PANTHER); PTHR24268:SF81 (PANTHER); IPR018114 (PROSITE_PATTERNS); IPR001254 (PROSITE_PROFILES); IPR009003 (SUPERFAMILY)                                                                                                                                                                                                              |
| 502 | 216869_length_321_cvg_2.0_tip_1_0  | 9    | mlrp2_acrmi ame: full=mam and ldl-receptor class a domain-containing protein 2 ame: full=skeletal organic matrix mam and ldl-receptor 2 short=som mam and ldl-receptor partial | 107 | 7.00E-22 | 61.80% | 0.111 | IPR002172 (SMART); IPR002172 (G3DSA:4.10.400.GENE3D); IPR000998 (PFAM); IPR002172 (PFAM); PTHR23282:SF75 (PANTHER); PTHR23282 (PANTHER); IPR023415 (PROSITE_PATTERNS); IPR000998 (PROSITE_PROFILES); IPR002172 (PROSITE_PROFILES); IPR002172 (SUPERFAMILY); IPR013320 (SUPERFAMILY)                                                                                                          |
| 503 | 216967_length_321_cvg_2.0_tip_1_1  | 9    | discoidin domain-containing receptor partial                                                                                                                                   | 107 | 4.02E-43 | 79.40% | 0.107 | IPR020635 (SMART); IPR001245 (PFAM); G3DSA:1.10.510.10 (GENE3D); PTHR24416 (PANTHER); PTHR24416:SF210 (PANTHER); IPR000719 (PROSITE_PROFILES); IPR011009 (SUPERFAMILY)                                                                                                                                                                                                                       |
| 504 | 217059_length_322_cvg_7.0_tip_1_4  | 23   | esterase fe4                                                                                                                                                                   | 107 | 5.57E-32 | 67.70% | 0.101 | IPR002018 (PFAM); IPR029058 (G3DSA:3.40.50.GENE3D); PTHR11559 (PANTHER); IPR019819 (PROSITE_PATTERNS); IPR029058 (SUPERFAMILY)                                                                                                                                                                                                                                                               |
| 505 | 217111_length_322_cvg_3.0_tip_1_4  | 12   | papilin isoform x2                                                                                                                                                             | 107 | 4.78E-44 | 82.50% | 0.112 | IPR002223 (PRINTS); IPR002223 (SMART); IPR002223 (G3DSA:4.10.410.GENE3D); IPR002223 (G3DSA:4.10.410.GENE3D); IPR002223 (G3DSA:4.10.410.GENE3D); IPR002223 (PFAM); PTHR10083 (PANTHER); IPR020901 (PROSITE_PATTERNS); IPR002223 (PROSITE_PROFILES); IPR002223 (SUPERFAMILY); IPR002223 (SUPERFAMILY)                                                                                          |
| 506 | 217381_length_322_cvg_2.0_tip_1_5  | 9    | zinc finger protein 282                                                                                                                                                        | 107 | 1.21E-18 | 57.70% | 0.128 | IPR015880 (SMART); PF13465 (PFAM); IPR013087 (G3DSA:3.30.160.GENE3D); IPR013087 (G3DSA:3.30.160.GENE3D); PTHR24409 (PANTHER); IPR007087 (PROSITE_PATTERNS); IPR007087 (PROSITE_PATTERNS); IPR007087 (PROSITE_PROFILES); IPR007087 (PROSITE_PROFILES); SSF57667 (SUPERFAMILY); SSF57667 (SUPERFAMILY)                                                                                         |
| 507 | 217667_length_323_cvg_2.0_tip_1_2  | 8    | platelet glycoprotein v                                                                                                                                                        | 107 | 3.31E-16 | 57.00% | 0.132 | IPR003591 (SMART); G3DSA:3.80.10.10 (GENE3D); IPR001611 (PFAM); PTHR24373:SF12 (PANTHER); PTHR24373 (PANTHER); IPR001611 (PROSITE_PROFILES); IPR001611 (PROSITE_PROFILES); SSF52058 (SUPERFAMILY)                                                                                                                                                                                            |
| 508 | 217683_length_323_cvg_5.0_tip_1_3  | 16   | plexin- partial                                                                                                                                                                | 108 | 2.79E-52 | 85.60% | 0.098 | IPR016201 (SMART); IPR015943 (G3DSA:2.130.10.GENE3D); IPR002165 (PFAM); G3DSA:3.30.1680.10 (GENE3D); PTHR22625:SF16 (PANTHER); PTHR22625 (PANTHER); IPR016201 (SUPERFAMILY); IPR001627 (SUPERFAMILY)                                                                                                                                                                                         |
| 509 | 217733_length_323_cvg_23.0_tip_1_1 | 71   | ---NA---                                                                                                                                                                       | 108 |          |        | 0.125 | IPR008197 (SMART); IPR008197 (PFAM); IPR008197 (G3DSA:4.10.75.GENE3D); IPR008197 (PROSITE_PROFILES); IPR008197 (SUPERFAMILY)                                                                                                                                                                                                                                                                 |
| 510 | 217857_length_323_cvg_2.0_tip_1_4  | 6    | dorsal-ventral patterning protein partial                                                                                                                                      | 108 | 1.33E-27 | 62.70% | 0.122 | IPR001007 (SMART); IPR001007 (PFAM); PTHR11339:SF223 (PANTHER); PTHR11339 (PANTHER); SSF57603 (SUPERFAMILY)                                                                                                                                                                                                                                                                                  |
| 511 | 217871_length_324_cvg_63.0_tip_1_1 | 2038 | ---NA---                                                                                                                                                                       | 108 |          |        | 0.134 | no IPS match                                                                                                                                                                                                                                                                                                                                                                                 |
| 512 | 218203_length_324_cvg_5.0_tip_1_4  | 15   | cd4-specific ankyrin repeat protein                                                                                                                                            | 108 | 1.38E-10 | 69.70% | 0.122 | IPR002110 (SMART); IPR020683 (G3DSA:1.25.40.GENE3D); IPR020683 (PFAM); PTHR24182 (PANTHER); IPR002110 (PROSITE_PROFILES); IPR020683 (PROSITE_PROFILES); IPR002110 (PROSITE_PROFILES); IPR020683 (SUPERFAMILY)                                                                                                                                                                                |
| 514 | 218323_length_325_cvg_18.7_tip_0_5 | 50   | wnt inhibitory factor 1 precursor                                                                                                                                              | 108 | 9.96E-61 | 93.40% | 0.123 | IPR000742 (SMART); IPR000742 (PFAM); IPR013111 (PFAM); IPR013032 (PFAM); G3DSA:2.10.25.10 (GENE3D); PTHR24838:SF276 (PANTHER); PTHR24838 (PANTHER); IPR013032 (PROSITE_PATTERNS); IPR013032 (PROSITE_PATTERNS); IPR013032 (PROSITE_PATTERNS); IPR013032 (PROSITE_PATTERNS); IPR013032 (PROSITE_PATTERNS); IPR000742 (PROSITE_PROFILES); IPR000742 (PROSITE_PROFILES); SSF57196 (SUPERFAMILY) |
| 515 | 218469_length_325_cvg_2.0_tip_1_5  | 4    | protein kinase brain isozyme                                                                                                                                                   | 108 | 7.76E-69 | 99.50% | 0.134 | IPR002290 (SMART); IPR000719 (PFAM); G3DSA:1.10.510.10 (GENE3D); G3DSA:3.30.200.20 (GENE3D); PTHR24357:SF75 (PANTHER); PTHR24357 (PANTHER); IPR008271 (PROSITE_PATTERNS); IPR000719 (PROSITE_PROFILES); IPR011009 (SUPERFAMILY)                                                                                                                                                              |



|     |                                    |      |                                                                                                                                  |     |          |        |         |                                                                                                                                                                                                                                                                                                                                                                                                              |
|-----|------------------------------------|------|----------------------------------------------------------------------------------------------------------------------------------|-----|----------|--------|---------|--------------------------------------------------------------------------------------------------------------------------------------------------------------------------------------------------------------------------------------------------------------------------------------------------------------------------------------------------------------------------------------------------------------|
| 516 | 218515_length_325_cvg_4.0_tip_1_5  | 11   | reelin- partial                                                                                                                  | 108 | 4.43E-26 | 70.70% | 0.126   | PTHR11841 (PANTHER)                                                                                                                                                                                                                                                                                                                                                                                          |
| 517 | 218571_length_325_cvg_3.0_tip_1_4  | 8    | low quality protein: carboxypeptidase n subunit 2                                                                                | 108 | 4.91E-08 | 54.70% | 0.122   | IPR003591 (SMART); PF13516 (PFAM); G3DSA:3.80.10.10 (GENE3D); IPR001611 (PFAM); PTHR24373:SF100 (PANTHER); PTHR24373 (PANTHER); IPR001611 (PROSITE_PROFILES); IPR001611 (PROSITE_PROFILES); SSF52058 (SUPERFAMILY)                                                                                                                                                                                           |
| 519 | 218729_length_326_cvg_2.0_tip_1_2  | 11   | endonuclease mitochondrial                                                                                                       | 108 | 3.35E-32 | 67.80% | 0.107   | IPR001604 (PFAM); IPR020821 (G3DSA:3.40.570.GENE3D); PTHR13966 (PANTHER); SSF54060 (SUPERFAMILY)                                                                                                                                                                                                                                                                                                             |
| 521 | 218787_length_326_cvg_2.0_tip_1_5  | 7    | leucine-rich transmembrane                                                                                                       | 108 | 1.50E-09 | 59.60% | 0.099   | PR00019 (PRINTS); IPR003591 (SMART); IPR001611 (PFAM); G3DSA:3.80.10.10 (GENE3D); IPR001611 (PFAM); PTHR24365 (PANTHER); IPR001611 (PROSITE_PROFILES); IPR001611 (PROSITE_PROFILES); IPR001611 (PROSITE_PROFILES); SSF52058 (SUPERFAMILY)                                                                                                                                                                    |
| 522 | 218873_length_326_cvg_8.7_tip_1_5  | 27   | 14-3-3 protein                                                                                                                   | 108 | 2.19E-51 | 84.60% | 0.107   | IPR000308 (PRINTS); IPR023410 (SMART); G3DSA:1.20.190.20 (GENE3D); IPR023410 (PFAM); IPR000308 (PANTHER); IPR023410 (SUPERFAMILY)                                                                                                                                                                                                                                                                            |
| 523 | 218943_length_326_cvg_3.0_tip_1_5  | 10   | ---NA---                                                                                                                         | 108 |          |        | 0.157   | IPR000436 (SMART); IPR000436 (PFAM); G3DSA:2.10.70.10 (GENE3D); IPR000436 (PROSITE_PROFILES); SignalP-TM (SIGNALP_GRAM_POSITIVE); IPR000436 (SUPERFAMILY)                                                                                                                                                                                                                                                    |
| 513 | 218307_length_325_cvg_76.8_tip_0_0 | 1229 | venom allergen 3-like                                                                                                            | 109 | 6.02E-15 | 50.30% | 0.122   | IPR014044 (PFAM); IPR014044 (G3DSA:3.40.33.GENE3D); IPR001283 (PANTHER); IPR014044 (SUPERFAMILY)                                                                                                                                                                                                                                                                                                             |
| 518 | 218661_length_325_cvg_2.0_tip_1_0  | 7    | low quality protein: titin-like                                                                                                  | 109 | 6.35E-45 | 78.20% | 0.103   | IPR003598 (SMART); IPR013783 (G3DSA:2.60.40.GENE3D); IPR013098 (PFAM); PTHR19897 (PANTHER); PTHR19897:SF149 (PANTHER); IPR007110 (PROSITE_PROFILES); SSF48726 (SUPERFAMILY)                                                                                                                                                                                                                                  |
| 520 | 218749_length_326_cvg_5.0_tip_1_3  | 15   | beta- -galactosyltransferase 5                                                                                                   | 109 | 1.19E-17 | 67.20% | 0.099   | Coil (COILS); IPR029044 (G3DSA:3.90.550.GENE3D); IPR027995 (PFAM); IPR003859 (PANTHER); IPR029044 (SUPERFAMILY)                                                                                                                                                                                                                                                                                              |
| 524 | 219005_length_326_cvg_3.0_tip_1_3  | 9    | vanin-like protein 1 isoform x1                                                                                                  | 109 | 8.10E-10 | 53.60% | 0.106   | IPR012101 (PANTHER); PTHR10609:SF14 (PANTHER)                                                                                                                                                                                                                                                                                                                                                                |
| 525 | 219139_length_327_cvg_3.0_tip_1_3  | 9    | gastrula zinc finger protein                                                                                                     | 109 | 5.52E-21 | 61.10% | 0.103   | IPR015880 (SMART); IPR008598 (PFAM); IPR013087 (G3DSA:3.30.160.GENE3D); IPR013087 (G3DSA:3.30.160.GENE3D); PF13465 (PFAM); PTHR24409 (PANTHER); PTHR24409:SF14 (PANTHER); IPR007087 (PROSITE_PATTERNS); IPR007087 (PROSITE_PATTERNS); IPR007087 (PROSITE_PATTERNS); IPR007087 (PROSITE_PROFILES); IPR007087 (PROSITE_PROFILES); IPR007087 (PROSITE_PROFILES); SSF57667 (SUPERFAMILY); SSF57667 (SUPERFAMILY) |
| 526 | 219635_length_328_cvg_2.0_tip_1_3  | 8    | vascular endothelial growth factor receptor 1-like                                                                               | 110 | 2.06E-53 | 91.90% | 0.152   | IPR020635 (SMART); G3DSA:1.10.510.10 (GENE3D); IPR001245 (PFAM); PTHR24416:SF298 (PANTHER); PTHR24416 (PANTHER); IPR008266 (PROSITE_PATTERNS); IPR000719 (PROSITE_PROFILES); IPR011009 (SUPERFAMILY)                                                                                                                                                                                                         |
| 527 | 219875_length_329_cvg_3.1_tip_1_4  | 9    | peptidyl-prolyl cis-trans isomerase g-like                                                                                       | 110 | 7.53E-31 | 70.30% | 0.098   | IPR000072 (PFAM); IPR029034 (G3DSA:2.10.90.GENE3D); PTHR21719:SF1 (PANTHER); PTHR21719 (PANTHER); IPR000072 (PROSITE_PROFILES); IPR029034 (SUPERFAMILY)                                                                                                                                                                                                                                                      |
| 528 | 220621_length_330_cvg_2.0_tip_1_0  | 5    | leucine-rich repeat-containing protein 47-like                                                                                   | 110 | 1.35E-25 | 67.80% | 0.11    | IPR003591 (SMART); SM00364 (SMART); IPR001611 (PFAM); G3DSA:3.80.10.10 (GENE3D); PTHR10947:SF2 (PANTHER); PTHR10947 (PANTHER); IPR001611 (PROSITE_PROFILES); IPR001611 (PROSITE_PROFILES); IPR001611 (PROSITE_PROFILES); SSF52058 (SUPERFAMILY)                                                                                                                                                              |
| 529 | 220687_length_331_cvg_3.0_tip_1_2  | 10   | mam and ldl-receptor class a domain-containing protein 2-like                                                                    | 110 | 3.00E-10 | 50.60% | 0.117   | IPR000998 (PFAM); PTHR23282:SF75 (PANTHER); PTHR23282 (PANTHER); CYTOPLASMIC_DOMAIN (PHOBIUS); NON_CYTOPLASMIC_DOMAIN (PHOBIUS); TRANSMEMBRANE (PHOBIUS); IPR000998 (PROSITE_PROFILES); IPR013320 (SUPERFAMILY)                                                                                                                                                                                              |
| 530 | 220711_length_331_cvg_6.0_tip_1_2  | 24   | chemosensory protein                                                                                                             | 110 | 4.25E-42 | 81.30% | 0.834 Y | IPR005055 (G3DSA:1.10.2080.GENE3D); IPR005055 (PFAM); IPR005055 (PANTHER); PTHR11257:SF4 (PANTHER); SIGNAL_PEPTIDE (PHOBIUS); SIGNAL_PEPTIDE_C_REGION (PHOBIUS); SIGNAL_PEPTIDE_H_REGION (PHOBIUS); NON_CYTOPLASMIC_DOMAIN (PHOBIUS); SIGNAL_PEPTIDE_N_REGION (PHOBIUS); SignalP-noTM (SIGNALP_EUK); IPR005055 (SUPERFAMILY)                                                                                 |
| 531 | 221085_length_332_cvg_4.0_tip_1_3  | 11   | attractin-like protein 1-like                                                                                                    | 111 | 6.44E-31 | 68.10% | 0.111   | IPR016201 (SMART); IPR002165 (PFAM); PTHR10574:SF3 (PANTHER); PTHR10574 (PANTHER)                                                                                                                                                                                                                                                                                                                            |
| 532 | 221173_length_332_cvg_3.7_tip_1_0  | 10   | alcohol dehydrogenase                                                                                                            | 111 | 2.40E-29 | 68.40% | 0.13    | IPR020471 (PRINTS); IPR023210 (PFAM); IPR023210 (G3DSA:3.20.20.GENE3D); IPR001395 (PANTHER); PTHR11732:SF144 (PANTHER); IPR023210 (SUPERFAMILY)                                                                                                                                                                                                                                                              |
| 533 | 221235_length_332_cvg_2.0_tip_1_4  | 6    | chondroitin sulfate                                                                                                              | 111 | 7.24E-53 | 85.80% | 0.12    | IPR003378 (PFAM); PTHR12369 (PANTHER); PTHR12369:SF11 (PANTHER)                                                                                                                                                                                                                                                                                                                                              |
| 534 | 221721_length_333_cvg_3.0_tip_1_1  | 9    | reelin                                                                                                                           | 111 | 2.77E-27 | 66.00% | 0.105   | G3DSA:2.10.25.10 (GENE3D); IPR013111 (PFAM); IPR006149 (PFAM); PTHR11841 (PANTHER); IPR013032 (PROSITE_PATTERNS); IPR013032 (PROSITE_PATTERNS); SSF57196 (SUPERFAMILY)                                                                                                                                                                                                                                       |
| 536 | 221925_length_334_cvg_3.0_tip_1_1  | 12   | achain kringle 2 domain of human plasminogen: nmr solution structure of trans-4-aminomethylcyclohexane-1-carboxylic acid complex | 111 | 8.26E-25 | 67.20% | 0.1     | PR00018 (PRINTS); IPR000001 (SMART); IPR000001 (PFAM); G3DSA:2.40.20.10 (GENE3D); PTHR24259 (PANTHER); IPR018056 (PROSITE_PATTERNS); IPR000001 (PROSITE_PROFILES); IPR013806 (SUPERFAMILY)                                                                                                                                                                                                                   |
| 537 | 222013_length_334_cvg_2.0_tip_1_1  | 8    | growth differentiation factor 8                                                                                                  | 111 | 9.42E-30 | 69.20% | 0.105   | IPR001111 (PFAM); IPR015615 (PANTHER); IPR015616 (PTHR11848:PANTHER)                                                                                                                                                                                                                                                                                                                                         |

|     |                                    |    |                                                                      |     |          |        |         |                                                                                                                                                                                                                                                                                                                                                                                                                                                                                                               |
|-----|------------------------------------|----|----------------------------------------------------------------------|-----|----------|--------|---------|---------------------------------------------------------------------------------------------------------------------------------------------------------------------------------------------------------------------------------------------------------------------------------------------------------------------------------------------------------------------------------------------------------------------------------------------------------------------------------------------------------------|
| 535 | 221893_length_334_cvg_2.0_tip_1_3  | 7  | tyrosine kinase receptor cad96ca                                     | 112 | 1.38E-53 | 89.60% | 0.281   | IPR001245 (PRINTS); IPR020635 (SMART); G3DSA:1.10.510.10 (GENE3D); IPR001245 (PFAM); PTHR24416:SF268 (PANTHER); PTHR24416 (PANTHER); IPR000719 (PROSITE_PROFILES); IPR011009 (SUPERFAMILY)                                                                                                                                                                                                                                                                                                                    |
| 538 | 222423_length_335_cvg_4.0_tip_1_4  | 13 | protein will die slowly                                              | 112 | 9.92E-73 | 98.20% | 0.105   | IPR001680 (SMART); IPR001680 (PFAM); IPR015943 (G3DSA:2.130.10.GENE3D); PTHR22847:SF308 (PANTHER); PTHR22847 (PANTHER); IPR019775 (PROSITE_PATTERNS); IPR001680 (PROSITE_PROFILES); IPR001680 (PROSITE_PROFILES); IPR017986 (PROSITE_PROFILES); IPR017986 (SUPERFAMILY)                                                                                                                                                                                                                                       |
| 539 | 222889_length_336_cvg_2.0_tip_1_2  | 9  | low quality protein: sco-spondin                                     | 112 | 6.71E-12 | 54.10% | 0.695 Y | IPR002172 (PRINTS); IPR002172 (SMART); IPR002172 (PFAM); IPR002172 (G3DSA:4.10.400.GENE3D); IPR002172 (G3DSA:4.10.400.GENE3D); PTHR10529:SF204 (PANTHER); PTHR10529 (PANTHER); SIGNAL_PEPTIDE_N_REGION (PHOBIUS); SIGNAL_PEPTIDE_C_REGION (PHOBIUS); NON_CYTOPLASMIC_DOMAIN (PHOBIUS); SIGNAL_PEPTIDE (PHOBIUS); SIGNAL_PEPTIDE_H_REGION (PHOBIUS); IPR002172 (PROSITE_PROFILES); IPR002172 (PROSITE_PROFILES); SignalP-noTM (SIGNALP_EUK); IPR002172 (SUPERFAMILY); IPR002172 (SUPERFAMILY); TMhelix (TMHMM) |
| 540 | 222983_length_337_cvg_2.0_tip_1_4  | 8  | scavenger partial                                                    | 112 | 1.11E-47 | 82.70% | 0.115   | IPR001695 (PFAM); PTHR19331 (PANTHER); PTHR19331:SF77 (PANTHER); IPR001190 (PROSITE_PROFILES)                                                                                                                                                                                                                                                                                                                                                                                                                 |
| 541 | 223121_length_337_cvg_2.0_tip_1_5  | 6  | fibrillin-2-like                                                     | 112 | 1.07E-47 | 84.10% | 0.117   | IPR000742 (SMART); IPR001881 (SMART); IPR001881 (PFAM); G3DSA:2.10.25.10 (GENE3D); G3DSA:2.10.25.10 (GENE3D); G3DSA:2.10.25.10 (GENE3D); IPR011398 (PANTHER); PTHR24039:SF20 (PANTHER); IPR013032 (PROSITE_PATTERNS); IPR000152 (PROSITE_PATTERNS); IPR000152 (PROSITE_PATTERNS); IPR000152 (PROSITE_PATTERNS); IPR018097 (PROSITE_PATTERNS); IPR013032 (PROSITE_PATTERNS); IPR018097 (PROSITE_PATTERNS); IPR000742 (PROSITE_PROFILES); IPR000742 (PROSITE_PROFILES); IPR009030 (SUPERFAMILY)                 |
| 542 | 223239_length_337_cvg_7.2_tip_1_4  | 22 | serine protease p69                                                  | 112 | 2.11E-21 | 59.80% | 0.105   | IPR001254 (PFAM); G3DSA:2.40.10.10 (GENE3D); PTHR24260 (PANTHER); PTHR24260:SF45 (PANTHER); IPR018114 (PROSITE_PATTERNS); IPR001254 (PROSITE_PROFILES); IPR009003 (SUPERFAMILY)                                                                                                                                                                                                                                                                                                                               |
| 543 | 223547_length_338_cvg_2.0_tip_1_0  | 7  | laminin subunit alpha                                                | 113 | 2.70E-43 | 80.60% | 0.109   | IPR002049 (SMART); G3DSA:2.10.25.10 (GENE3D); G3DSA:2.10.25.10 (GENE3D); IPR002049 (PFAM); PTHR10574 (PANTHER); PTHR10574:SF39 (PANTHER); IPR002049 (PROSITE_PATTERNS); SSF57196 (SUPERFAMILY); SSF57196 (SUPERFAMILY)                                                                                                                                                                                                                                                                                        |
| 544 | 223559_length_338_cvg_2.0_tip_1_1  | 7  | calcium activated chlorine                                           | 113 | 3.38E-15 | 53.80% | 0.102   | IPR015394 (PFAM); PTHR10579 (PANTHER); PTHR10579:SF43 (PANTHER)                                                                                                                                                                                                                                                                                                                                                                                                                                               |
| 545 | 223841_length_339_cvg_4.0_tip_1_4  | 16 | growth differentiation factor 8-like                                 | 113 | 1.32E-65 | 84.20% | 0.101   | IPR001839 (SMART); IPR029034 (G3DSA:2.10.90.GENE3D); IPR001839 (PFAM); IPR015616 (PTHR11848:PANTHER); IPR015615 (PANTHER); IPR017948 (PROSITE_PATTERNS); IPR001839 (PROSITE_PROFILES); IPR029034 (SUPERFAMILY)                                                                                                                                                                                                                                                                                                |
| 546 | 223995_length_339_cvg_3.7_tip_1_5  | 13 | lysosomal pro-x carboxypeptidase-like                                | 113 | 4.32E-27 | 75.90% | 0.198   | IPR008758 (PFAM); IPR008758 (PANTHER); PTHR11010:SF11 (PANTHER); CYTOPLASMIC_DOMAIN (PHOBIUS); NON_CYTOPLASMIC_DOMAIN (PHOBIUS); TRANSMEMBRANE (PHOBIUS); TMhelix (TMHMM)                                                                                                                                                                                                                                                                                                                                     |
| 547 | 224017_length_339_cvg_3.9_tip_1_1  | 14 | xanthine dehydrogenase oxidase                                       | 113 | 4.32E-51 | 84.00% | 0.105   | IPR008274 (PFAM); IPR008274 (G3DSA:3.30.365.GENE3D); PTHR11908:SF32 (PANTHER); PTHR11908 (PANTHER); IPR008274 (SUPERFAMILY)                                                                                                                                                                                                                                                                                                                                                                                   |
| 548 | 224037_length_339_cvg_7.0_tip_1_2  | 25 | cda2 isoform a                                                       | 113 | 5.86E-50 | 83.70% | 0.246   | IPR002172 (SMART); IPR002557 (PFAM); IPR002172 (PFAM); IPR002172 (G3DSA:4.10.400.GENE3D); IPR002557 (G3DSA:2.170.140.GENE3D); PTHR11177:SF136 (PANTHER); PTHR11177 (PANTHER); IPR023415 (PROSITE_PATTERNS); IPR002172 (PROSITE_PROFILES); IPR002172 (SUPERFAMILY); IPR002557 (SUPERFAMILY)                                                                                                                                                                                                                    |
| 549 | 224075_length_339_cvg_16.0_tip_1_5 | 31 | acyl- delta desaturase                                               | 113 | 3.23E-55 | 83.10% | 0.507 Y | IPR015876 (PRINTS); IPR005804 (PFAM); PTHR11351 (PANTHER); PTHR11351:SF28 (PANTHER); TRANSMEMBRANE (PHOBIUS); CYTOPLASMIC_DOMAIN (PHOBIUS); NON_CYTOPLASMIC_DOMAIN (PHOBIUS); SignalP-noTM (SIGNALP_EUK); TMhelix (TMHMM)                                                                                                                                                                                                                                                                                     |
| 553 | 224635_length_341_cvg_22.7_tip_0_2 | 39 | cytochrome p450 3a11-like                                            | 113 | 4.99E-36 | 73.60% | 0.125   | IPR002401 (PRINTS); IPR001128 (PFAM); IPR001128 (G3DSA:1.10.630.GENE3D); PTHR24292 (PANTHER); PTHR24292:SF24 (PANTHER); IPR017972 (PROSITE_PATTERNS); IPR001128 (SUPERFAMILY)                                                                                                                                                                                                                                                                                                                                 |
| 555 | 224743_length_341_cvg_5.2_tip_1_2  | 18 | gastrula zinc finger                                                 | 113 | 7.84E-20 | 62.10% | 0.099   | IPR015880 (SMART); IPR013087 (G3DSA:3.30.160.GENE3D); PF13465 (PFAM); IPR013087 (G3DSA:3.30.160.GENE3D); PTHR24409 (PANTHER); IPR007087 (PROSITE_PATTERNS); IPR007087 (PROSITE_PATTERNS); IPR007087 (PROSITE_PATTERNS); IPR007087 (PROSITE_PROFILES); IPR007087 (PROSITE_PROFILES); SSF57667 (SUPERFAMILY); SSF57667 (SUPERFAMILY)                                                                                                                                                                            |
| 550 | 224163_length_340_cvg_8.0_tip_1_0  | 16 | basement membrane-specific heparan sulfate proteoglycan core protein | 114 | 1.95E-25 | 56.20% | 0.101   | IPR003599 (SMART); IPR003598 (SMART); IPR002172 (G3DSA:4.10.400.GENE3D); PF13895 (PFAM); IPR013783 (G3DSA:2.60.40.GENE3D); IPR007110 (PROSITE_PROFILES); SSF48726 (SUPERFAMILY); IPR002172 (SUPERFAMILY)                                                                                                                                                                                                                                                                                                      |

|     |                                    |    |                                                                |     |          |        |       |                                                                                                                                                                                                                                                                                                                                                                                                                                                             |
|-----|------------------------------------|----|----------------------------------------------------------------|-----|----------|--------|-------|-------------------------------------------------------------------------------------------------------------------------------------------------------------------------------------------------------------------------------------------------------------------------------------------------------------------------------------------------------------------------------------------------------------------------------------------------------------|
| 551 | 224375_length_340_cvg_7.0_tip_1_3  | 25 | von willebrand factor a domain-containing protein 8-like       | 114 | 1.33E-54 | 85.00% | 0.121 | PTHR21610 (PANTHER); PTHR21610:SF9 (PANTHER); IPR002035 (SUPERFAMILY)                                                                                                                                                                                                                                                                                                                                                                                       |
| 552 | 224557_length_341_cvg_14.3_tip_0_3 | 35 | egf domain protein                                             | 114 | 5.25E-12 | 48.10% | 0.101 | IPR002223 (G3DSA:4.10.410.GENE3D); IPR023413 (G3DSA:2.40.155.GENE3D); IPR002223 (PFAM); IPR002223 (G3DSA:4.10.410.GENE3D); PTHR10083 (PANTHER); IPR013032 (PROSITE_PATTERNS); IPR020901 (PROSITE_PATTERNS); IPR002223 (PROSITE_PROFILES); IPR000742 (PROSITE_PROFILES); IPR002223 (SUPERFAMILY); SSF57196 (SUPERFAMILY); IPR002223 (SUPERFAMILY)                                                                                                            |
| 554 | 224699_length_341_cvg_2.0_tip_1_3  | 6  | voltage-gated sodium partial                                   | 114 | 2.31E-57 | 91.60% | 0.276 | IPR005821 (PFAM); IPR027359 (G3DSA:1.20.120.GENE3D); PTHR10037 (PANTHER); IPR028814 (PTHR10037:PANTHER); CYTOPLASMIC_DOMAIN (PHOBIUS); TRANSMEMBRANE (PHOBIUS); NON_CYTOPLASMIC_DOMAIN (PHOBIUS); TRANSMEMBRANE (PHOBIUS); NON_CYTOPLASMIC_DOMAIN (PHOBIUS); SSF81324 (SUPERFAMILY); TMhelix (TMHMM); TMhelix (TMHMM)                                                                                                                                       |
| 556 | 224827_length_342_cvg_2.0_tip_1_3  | 7  | low quality protein: titin-like                                | 114 | 6.36E-49 | 86.00% | 0.103 | IPR013783 (G3DSA:2.60.40.GENE3D); IPR013098 (PFAM); PTHR19897 (PANTHER); PTHR19897:SF149 (PANTHER); IPR007110 (PROSITE_PROFILES); SSF48726 (SUPERFAMILY)                                                                                                                                                                                                                                                                                                    |
| 557 | 224915_length_342_cvg_7.0_tip_1_4  | 23 | er degradation-enhancing alpha-mannosidase-like protein 2-like | 114 | 1.56E-57 | 89.50% | 0.1   | IPR001382 (PRINTS); IPR001382 (G3DSA:1.50.10.GENE3D); IPR001382 (PFAM); PTHR11742:SF37 (PANTHER); IPR001382 (PANTHER); IPR001382 (SUPERFAMILY)                                                                                                                                                                                                                                                                                                              |
| 558 | 224987_length_342_cvg_2.0_tip_1_0  | 9  | secreted frizzled-related protein 3                            | 114 | 1.94E-31 | 71.10% | 0.27  | IPR020067 (SMART); IPR020067 (G3DSA:1.10.2000.GENE3D); IPR020067 (PFAM); IPR015526 (PANTHER); PTHR11309:SF83 (PANTHER); IPR020067 (PROSITE_PROFILES); IPR020067 (SUPERFAMILY)                                                                                                                                                                                                                                                                               |
| 559 | 225111_length_342_cvg_4.0_tip_1_1  | 16 | maguk p55 subfamily member 7 isoform x4                        | 114 | 1.81E-54 | 91.40% | 0.1   | IPR008145 (SMART); IPR008145 (PFAM); G3DSA:3.30.63.10 (GENE3D); IPR027417 (G3DSA:3.40.50.GENE3D); PTHR23122 (PANTHER); PTHR23122:SF14 (PANTHER); IPR020590 (PROSITE_PATTERNS); IPR008144 (PROSITE_PROFILES); IPR027417 (SUPERFAMILY)                                                                                                                                                                                                                        |
| 561 | 225377_length_343_cvg_4.0_tip_1_2  | 15 | maguk p55 subfamily member 7 isoform x1                        | 114 | 6.25E-60 | 90.20% | 0.113 | IPR001452 (PRINTS); IPR001452 (SMART); IPR011511 (PFAM); G3DSA:2.30.30.40 (GENE3D); PTHR23122:SF14 (PANTHER); PTHR23122 (PANTHER); IPR001452 (PROSITE_PROFILES); IPR001452 (SUPERFAMILY)                                                                                                                                                                                                                                                                    |
| 560 | 225305_length_343_cvg_2.0_tip_1_0  | 6  | gastrula zinc finger                                           | 115 | 1.26E-20 | 63.40% | 0.102 | IPR015880 (SMART); PF13894 (PFAM); IPR013087 (G3DSA:3.30.160.GENE3D); IPR007087 (PFAM); PF13465 (PFAM); IPR013087 (G3DSA:3.30.160.GENE3D); PTHR24409 (PANTHER); PTHR24409:SF13 (PANTHER); IPR007087 (PROSITE_PATTERNS); IPR007087 (PROSITE_PATTERNS); IPR007087 (PROSITE_PATTERNS); IPR007087 (PROSITE_PROFILES); IPR007087 (PROSITE_PROFILES); IPR007087 (PROSITE_PROFILES); SSF57667 (SUPERFAMILY); SSF57667 (SUPERFAMILY)                                |
| 562 | 225475_length_343_cvg_4.0_tip_1_0  | 15 | neuroendocrine convertase 2                                    | 115 | 1.45E-59 | 85.70% | 0.1   | IPR002884 (PFAM); IPR008979 (G3DSA:2.60.120.GENE3D); IPR015500 (PANTHER); PTHR10795:SF11 (PANTHER); IPR008979 (SUPERFAMILY)                                                                                                                                                                                                                                                                                                                                 |
| 563 | 225633_length_344_cvg_2.0_tip_1_1  | 11 | gamma-glutamyltranspeptidase 1-like                            | 115 | 1.48E-45 | 78.90% | 0.103 | IPR000101 (PRINTS); IPR000101 (PFAM); PTHR11686:SF15 (PANTHER); IPR000101 (PANTHER); IPR029055 (SUPERFAMILY)                                                                                                                                                                                                                                                                                                                                                |
| 564 | 225965_length_345_cvg_2.0_tip_1_4  | 10 | protein yellow-like                                            | 115 | 8.80E-20 | 60.70% | 0.112 | IPR017996 (PFAM); IPR011042 (G3DSA:2.120.10.GENE3D)                                                                                                                                                                                                                                                                                                                                                                                                         |
| 565 | 225989_length_345_cvg_2.0_tip_1_1  | 11 | spermatogenesis-associated protein 5-like                      | 115 | 4.86E-45 | 80.60% | 0.143 | Coil (COILS); G3DSA:1.10.8.60 (GENE3D); IPR027417 (G3DSA:3.40.50.GENE3D); IPR003959 (PFAM); PTHR23077:SF27 (PANTHER); PTHR23077 (PANTHER); IPR003960 (PROSITE_PATTERNS); IPR027417 (SUPERFAMILY)                                                                                                                                                                                                                                                            |
| 566 | 226157_length_345_cvg_11.0_tip_1_2 | 42 | collagen alpha-2 partial                                       | 115 | 3.96E-66 | 89.20% | 0.132 | IPR001442 (SMART); IPR001442 (PFAM); IPR001442 (G3DSA:2.170.240.GENE3D); PTHR24023:SF397 (PANTHER); PTHR24023 (PANTHER); IPR001442 (PROSITE_PROFILES); IPR016187 (SUPERFAMILY)                                                                                                                                                                                                                                                                              |
| 567 | 226203_length_345_cvg_3.8_tip_1_0  | 13 | zinc c2h2 type                                                 | 115 | 9.90E-16 | 57.70% | 0.099 | IPR015880 (SMART); IPR013087 (G3DSA:3.30.160.GENE3D); PF13465 (PFAM); IPR013087 (G3DSA:3.30.160.GENE3D); IPR013087 (G3DSA:3.30.160.GENE3D); IPR007087 (PFAM); PTHR24409:SF14 (PANTHER); PTHR24409 (PANTHER); IPR007087 (PROSITE_PATTERNS); IPR007087 (PROSITE_PATTERNS); IPR007087 (PROSITE_PATTERNS); IPR007087 (PROSITE_PATTERNS); IPR007087 (PROSITE_PROFILES); IPR007087 (PROSITE_PROFILES); SSF57667 (SUPERFAMILY); SSF57667 (SUPERFAMILY)             |
| 568 | 226251_length_345_cvg_2.2_tip_1_2  | 8  | pr domain zinc finger protein 1 isoform x2                     | 115 | 7.06E-21 | 65.00% | 0.099 | IPR015880 (SMART); IPR013087 (G3DSA:3.30.160.GENE3D); IPR013087 (G3DSA:3.30.160.GENE3D); PF13465 (PFAM); IPR013087 (G3DSA:3.30.160.GENE3D); PTHR24409 (PANTHER); PTHR24409:SF14 (PANTHER); IPR007087 (PROSITE_PATTERNS); IPR007087 (PROSITE_PATTERNS); IPR007087 (PROSITE_PATTERNS); IPR007087 (PROSITE_PATTERNS); IPR007087 (PROSITE_PROFILES); IPR007087 (PROSITE_PROFILES); IPR007087 (PROSITE_PROFILES); SSF57667 (SUPERFAMILY); SSF57667 (SUPERFAMILY) |

|     |                                   |    |                                                                      |     |          |        |         |                                                                                                                                                                                                                                                                                                                                                                                                                                                                                                 |
|-----|-----------------------------------|----|----------------------------------------------------------------------|-----|----------|--------|---------|-------------------------------------------------------------------------------------------------------------------------------------------------------------------------------------------------------------------------------------------------------------------------------------------------------------------------------------------------------------------------------------------------------------------------------------------------------------------------------------------------|
| 569 | 226415_length_346_cvg_2.8_tip_1_5 | 8  | zinc finger protein 891                                              | 115 | 2.01E-21 | 61.10% | 0.1     | IPR015880 (SMART); IPR013087 (G3DSA:3.30.160.GENE3D); PF13465 (PFAM); IPR013087 (G3DSA:3.30.160.GENE3D); PTHR24409:SF13 (PANTHER); PTHR24409 (PANTHER); IPR007087 (PROSITE_PATTERNS); IPR007087 (PROSITE_PATTERNS); IPR007087 (PROSITE_PATTERNS); IPR007087 (PROSITE_PATTERNS); IPR007087 (PROSITE_PROFILES); IPR007087 (PROSITE_PROFILES); IPR007087 (PROSITE_PROFILES); IPR007087 (PROSITE_PROFILES); SSF57667 (SUPERFAMILY); SSF57667 (SUPERFAMILY)                                          |
| 571 | 226789_length_347_cvg_2.0_tip_1_5 | 8  | zinc finger protein 45-like                                          | 115 | 1.07E-24 | 59.10% | 0.111   | IPR015880 (SMART); PF13912 (PFAM); IPR013087 (G3DSA:3.30.160.GENE3D); PF13894 (PFAM); IPR013087 (G3DSA:3.30.160.GENE3D); IPR013087 (G3DSA:3.30.160.GENE3D); PF13465 (PFAM); PTHR24409 (PANTHER); IPR007087 (PROSITE_PATTERNS); IPR007087 (PROSITE_PATTERNS); IPR007087 (PROSITE_PATTERNS); IPR007087 (PROSITE_PATTERNS); IPR007087 (PROSITE_PROFILES); IPR007087 (PROSITE_PROFILES); IPR007087 (PROSITE_PROFILES); IPR007087 (PROSITE_PROFILES); SSF57667 (SUPERFAMILY); SSF57667 (SUPERFAMILY) |
| 573 | 226903_length_347_cvg_7.0_tip_1_2 | 27 | 26s protease regulatory subunit 6b                                   | 115 | 3.77E-75 | 99.90% | 0.106   | IPR027417 (G3DSA:3.40.50.GENE3D); IPR003959 (PFAM); PTHR23073 (PANTHER); IPR027417 (SUPERFAMILY)                                                                                                                                                                                                                                                                                                                                                                                                |
| 575 | 226927_length_347_cvg_2.0_tip_1_2 | 9  | matrix metalloproteinase                                             | 115 | 7.60E-22 | 79.10% | 0.102   | IPR018487 (SMART); IPR018487 (PFAM); IPR000585 (G3DSA:2.110.10.GENE3D); PTHR10201 (PANTHER); PTHR10201:SF131 (PANTHER); IPR018487 (PROSITE_PROFILES); IPR000585 (SUPERFAMILY)                                                                                                                                                                                                                                                                                                                   |
| 576 | 226973_length_347_cvg_5.4_tip_1_2 | 21 | low-density lipoprotein receptor-related protein 2                   | 115 | 7.80E-60 | 86.30% | 0.172   | IPR002172 (PRINTS); IPR002172 (SMART); IPR002172 (G3DSA:4.10.400.GENE3D); IPR002172 (PFAM); IPR002172 (G3DSA:4.10.400.GENE3D); PTHR10529 (PANTHER); IPR023415 (PROSITE_PATTERNS); IPR023415 (PROSITE_PATTERNS); IPR002172 (PROSITE_PROFILES); IPR002172 (PROSITE_PROFILES); IPR002172 (PROSITE_PROFILES); IPR002172 (PROSITE_PROFILES); IPR002172 (SUPERFAMILY); IPR002172 (SUPERFAMILY)                                                                                                        |
| 570 | 226665_length_347_cvg_2.0_tip_1_3 | 6  | otopetrin-2 isoform x1                                               | 116 | 1.38E-22 | 63.50% | 0.122   | IPR004878 (PFAM); PTHR21522:SF37 (PANTHER); IPR004878 (PANTHER); CYTOPLASMIC_DOMAIN (PHOBIUS); NON_CYTOPLASMIC_DOMAIN (PHOBIUS); TRANSMEMBRANE (PHOBIUS); TMhelix (TMHMM)                                                                                                                                                                                                                                                                                                                       |
| 572 | 226857_length_347_cvg_2.0_tip_1_3 | 8  | zinc finger protein 777- partial                                     | 116 | 6.09E-14 | 72.70% | 0.122   | IPR015880 (SMART); PF13465 (PFAM); IPR013087 (G3DSA:3.30.160.GENE3D); IPR013087 (G3DSA:3.30.160.GENE3D); PTHR24409 (PANTHER); IPR007087 (PROSITE_PATTERNS); IPR007087 (PROSITE_PATTERNS); IPR007087 (PROSITE_PROFILES); IPR007087 (PROSITE_PROFILES); SSF57667 (SUPERFAMILY)                                                                                                                                                                                                                    |
| 574 | 226905_length_347_cvg_2.0_tip_1_0 | 6  | endothelin-converting enzyme                                         | 116 | 1.94E-63 | 89.40% | 0.118   | IPR018497 (PRINTS); IPR024079 (G3DSA:3.40.390.GENE3D); IPR018497 (PFAM); IPR000718 (PANTHER); IPR029733 (PTHR11733:PANTHER); SSF55486 (SUPERFAMILY)                                                                                                                                                                                                                                                                                                                                             |
| 577 | 227059_length_348_cvg_3.0_tip_1_3 | 13 | gastrula zinc finger                                                 | 116 | 3.03E-23 | 61.30% | 0.1     | IPR015880 (SMART); PF13465 (PFAM); IPR013087 (G3DSA:3.30.160.GENE3D); IPR013087 (G3DSA:3.30.160.GENE3D); IPR013087 (G3DSA:3.30.160.GENE3D); PTHR24409 (PANTHER); IPR007087 (PROSITE_PATTERNS); IPR007087 (PROSITE_PATTERNS); IPR007087 (PROSITE_PATTERNS); IPR007087 (PROSITE_PROFILES); IPR007087 (PROSITE_PROFILES); IPR007087 (PROSITE_PROFILES); IPR007087 (PROSITE_PROFILES); SSF57667 (SUPERFAMILY); SSF57667 (SUPERFAMILY)                                                               |
| 578 | 227095_length_348_cvg_2.0_tip_1_3 | 6  | ---NA---                                                             | 116 |          |        | 0.109   | no IPS match                                                                                                                                                                                                                                                                                                                                                                                                                                                                                    |
| 579 | 227153_length_348_cvg_2.8_tip_1_0 | 10 | matrix metalloproteinase-9                                           | 116 | 8.65E-11 | 47.50% | 0.161   | IPR000562 (SMART); IPR000562 (PFAM); IPR000562 (G3DSA:2.10.10.GENE3D); IPR000562 (PROSITE_PROFILES); IPR000562 (PROSITE_PROFILES); IPR013806 (SUPERFAMILY); IPR013806 (SUPERFAMILY)                                                                                                                                                                                                                                                                                                             |
| 580 | 227213_length_348_cvg_3.0_tip_1_5 | 9  | sortilin-related receptor-like isoform x2                            | 116 | 7.26E-32 | 65.90% | 0.108   | G3DSA:2.130.10.140 (GENE3D); PTHR12106:SF7 (PANTHER); PTHR12106 (PANTHER); SSF110296 (SUPERFAMILY)                                                                                                                                                                                                                                                                                                                                                                                              |
| 581 | 227261_length_348_cvg_3.4_tip_1_5 | 12 | kielin chordin-like protein                                          | 116 | 4.18E-11 | 43.00% | 0.103   | G3DSA:2.10.70.10 (GENE3D); SSF57603 (SUPERFAMILY); SSF57603 (SUPERFAMILY)                                                                                                                                                                                                                                                                                                                                                                                                                       |
| 582 | 227341_length_348_cvg_2.0_tip_1_0 | 4  | titin isoform x1                                                     | 116 | 1.46E-34 | 68.30% | 0.099   | IPR003599 (SMART); IPR013098 (PFAM); IPR013783 (G3DSA:2.60.40.GENE3D); IPR020675 (PANTHER); IPR007110 (PROSITE_PROFILES); SSF48726 (SUPERFAMILY)                                                                                                                                                                                                                                                                                                                                                |
| 583 | 227533_length_349_cvg_2.0_tip_1_2 | 5  | doublecortin-like protein kinase                                     | 116 | 3.73E-43 | 76.30% | 0.592 Y | G3DSA:1.10.510.10 (GENE3D); IPR000719 (PFAM); PTHR24347:SF49 (PANTHER); IPR020636 (PANTHER); IPR000719 (PROSITE_PROFILES); SignalP-noTM (SIGNALP_EUK); IPR011009 (SUPERFAMILY)                                                                                                                                                                                                                                                                                                                  |
| 585 | 227571_length_349_cvg_3.0_tip_1_2 | 9  | laccase-1-like isoform x1                                            | 116 | 2.47E-47 | 79.00% | 0.124   | IPR011706 (PFAM); IPR008972 (G3DSA:2.60.40.GENE3D); PTHR11709:SF33 (PANTHER); PTHR11709 (PANTHER); IPR002355 (PROSITE_PATTERNS); IPR002355 (PROSITE_PATTERNS); IPR008972 (SUPERFAMILY)                                                                                                                                                                                                                                                                                                          |
| 588 | 227687_length_349_cvg_2.0_tip_1_4 | 7  | de-cadherin-like isoform x1                                          | 116 | 6.28E-19 | 57.90% | 0.11    | IPR002126 (G3DSA:2.60.40.GENE3D); IPR015919 (SUPERFAMILY)                                                                                                                                                                                                                                                                                                                                                                                                                                       |
| 591 | 228041_length_350_cvg_6.1_tip_1_2 | 13 | upf0764 protein c16orf89 homolog                                     | 116 | 6.29E-10 | 49.00% | 0.176   | no IPS match                                                                                                                                                                                                                                                                                                                                                                                                                                                                                    |
| 584 | 227559_length_349_cvg_3.5_tip_1_3 | 14 | down syndrome cell adhesion molecule-like protein dscam2 isoform x29 | 117 | 1.64E-59 | 90.00% | 0.11    | IPR003961 (PFAM); IPR013783 (G3DSA:2.60.40.GENE3D); PTHR10489 (PANTHER); PTHR10489:SF567 (PANTHER); IPR003961 (PROSITE_PROFILES); IPR003961 (PROSITE_PROFILES); IPR003961 (SUPERFAMILY)                                                                                                                                                                                                                                                                                                         |



|     |                                   |    |                                                     |     |          |        |       |                                                                                                                                                                                                                                                                                                                                                                                                                                                                          |
|-----|-----------------------------------|----|-----------------------------------------------------|-----|----------|--------|-------|--------------------------------------------------------------------------------------------------------------------------------------------------------------------------------------------------------------------------------------------------------------------------------------------------------------------------------------------------------------------------------------------------------------------------------------------------------------------------|
| 586 | 227641_length_349_cvg_5.2_tip_1_3 | 12 | serine (or cysteine) proteinase clade b member      | 117 | 1.09E-12 | 71.10% | 0.113 | G3DSA:2.30.39.10 (GENE3D); IPR023796 (PFAM); PTHR11461:SF52 (PANTHER); IPR000215 (PANTHER); IPR023795 (PROSITE_PATTERNS); IPR023796 (SUPERFAMILY)                                                                                                                                                                                                                                                                                                                        |
| 587 | 227665_length_349_cvg_2.0_tip_1_0 | 7  | fasciclin-2 isoform x4                              | 117 | 1.65E-15 | 54.70% | 0.13  | IPR003598 (SMART); IPR003599 (SMART); IPR013783 (G3DSA:2.60.40.GENE3D); IPR013098 (PFAM); PTHR10489 (PANTHER); IPR007110 (PROSITE_PROFILES); SSF48726 (SUPERFAMILY)                                                                                                                                                                                                                                                                                                      |
| 589 | 227881_length_350_cvg_2.0_tip_1_3 | 12 | cubilin, partial                                    | 117 | 8.92E-27 | 59.00% | 0.118 | IPR000859 (SMART); IPR000859 (G3DSA:2.60.120.GENE3D); IPR000859 (PFAM); PTHR10127 (PANTHER); IPR000859 (PROSITE_PROFILES); IPR000859 (SUPERFAMILY)                                                                                                                                                                                                                                                                                                                       |
| 590 | 227923_length_350_cvg_2.0_tip_1_3 | 7  | aael005189- partial                                 | 117 | 1.42E-33 | 68.50% | 0.31  | IPR003598 (SMART); IPR013783 (G3DSA:2.60.40.GENE3D); IPR013098 (PFAM); PTHR19831:SF50 (PANTHER); PTHR19831 (PANTHER); IPR007110 (PROSITE_PROFILES); SSF48726 (SUPERFAMILY)                                                                                                                                                                                                                                                                                               |
| 592 | 228081_length_351_cvg_3.0_tip_1_3 | 13 | phospholipase a2-like                               | 117 | 2.95E-18 | 65.90% | 0.101 | IPR016090 (G3DSA:1.20.90.GENE3D); IPR016090 (PFAM); IPR013090 (PROSITE_PATTERNS); IPR016090 (SUPERFAMILY)                                                                                                                                                                                                                                                                                                                                                                |
| 593 | 228127_length_351_cvg_3.0_tip_1_5 | 9  | plexin-a4                                           | 117 | 2.19E-68 | 97.30% | 0.109 | IPR013548 (PFAM); PTHR22625 (PANTHER)                                                                                                                                                                                                                                                                                                                                                                                                                                    |
| 594 | 228175_length_351_cvg_3.0_tip_1_3 | 10 | gastrula zinc finger protein - partial              | 117 | 2.44E-24 | 61.10% | 0.105 | IPR015880 (SMART); IPR013087 (G3DSA:3.30.160.GENE3D); PF13465 (PFAM); IPR013087 (G3DSA:3.30.160.GENE3D); IPR007087 (PFAM); PTHR24409 (PANTHER); PTHR24409:SF14 (PANTHER); IPR007087 (PROSITE_PATTERNS); IPR007087 (PROSITE_PATTERNS); IPR007087 (PROSITE_PATTERNS); IPR007087 (PROSITE_PATTERNS); IPR007087 (PROSITE_PROFILES); IPR007087 (PROSITE_PROFILES); IPR007087 (PROSITE_PROFILES); IPR007087 (PROSITE_PROFILES); SSF57667 (SUPERFAMILY); SSF57667 (SUPERFAMILY) |
| 595 | 228499_length_352_cvg_2.0_tip_1_3 | 4  | dlp hdl-bgbp precursor                              | 118 | 5.73E-37 | 75.40% | 0.1   | IPR015255 (PFAM); IPR015817 (G3DSA:2.20.50.GENE3D); PTHR23345 (PANTHER); PTHR23345:SF11 (PANTHER); IPR015819 (SUPERFAMILY)                                                                                                                                                                                                                                                                                                                                               |
| 596 | 228609_length_352_cvg_3.0_tip_1_3 | 11 | growth differentiation factor 8-like                | 118 | 1.23E-08 | 67.00% | 0.107 | IPR001839 (SMART); IPR029034 (G3DSA:2.10.90.GENE3D); IPR001839 (PFAM); IPR015615 (PANTHER); PTHR11848:SF126 (PANTHER); IPR001839 (PROSITE_PROFILES); IPR029034 (SUPERFAMILY)                                                                                                                                                                                                                                                                                             |
| 597 | 228679_length_353_cvg_3.0_tip_1_0 | 9  | bone morphogenetic protein receptor type-2          | 118 | 1.58E-48 | 79.80% | 0.139 | IPR000719 (PFAM); G3DSA:1.10.510.10 (GENE3D); PTHR23255:SF52 (PANTHER); IPR000333 (PANTHER); IPR000719 (PROSITE_PROFILES); IPR011009 (SUPERFAMILY)                                                                                                                                                                                                                                                                                                                       |
| 598 | 228775_length_353_cvg_2.0_tip_1_1 | 10 | achain crystal structure of anti-il4 darpin 44c12v5 | 118 | 1.19E-14 | 60.40% | 0.108 | IPR002110 (PRINTS); IPR002110 (SMART); IPR020683 (PFAM); IPR020683 (G3DSA:1.25.40.GENE3D); PTHR24198 (PANTHER); IPR020683 (PROSITE_PROFILES); IPR002110 (PROSITE_PROFILES); IPR002110 (PROSITE_PROFILES); IPR002110 (PROSITE_PROFILES); IPR002110 (PROSITE_PROFILES); IPR020683 (SUPERFAMILY)                                                                                                                                                                            |
| 599 | 228811_length_353_cvg_2.0_tip_1_4 | 8  | low-density lipoprotein                             | 118 | 2.88E-40 | 68.00% | 0.104 | IPR002172 (PRINTS); IPR002172 (SMART); IPR002172 (PFAM); IPR002172 (G3DSA:4.10.400.GENE3D); IPR002172 (G3DSA:4.10.400.GENE3D); IPR002172 (G3DSA:4.10.400.GENE3D); PTHR10529 (PANTHER); IPR023415 (PROSITE_PATTERNS); IPR023415 (PROSITE_PATTERNS); IPR023415 (PROSITE_PATTERNS); IPR002172 (PROSITE_PROFILES); IPR002172 (PROSITE_PROFILES); IPR002172 (SUPERFAMILY); IPR002172 (SUPERFAMILY); IPR002172 (SUPERFAMILY)                                                   |
| 600 | 228893_length_353_cvg_3.0_tip_1_0 | 5  | hypothetical protein, partial                       | 118 | 1.06E-11 | 49.40% | 0.154 | no IPS match                                                                                                                                                                                                                                                                                                                                                                                                                                                             |
| 601 | 228893_length_353_cvg_3.0_tip_1_3 | 5  | collagen alpha-1 chain                              | 118 | 1.15E-34 | 76.50% | 0.112 | IPR008160 (PFAM); PTHR24023 (PANTHER); PTHR24023:SF164 (PANTHER)                                                                                                                                                                                                                                                                                                                                                                                                         |
| 602 | 229133_length_354_cvg_2.2_tip_1_2 | 9  | protein rtoa- partial                               | 118 | 6.98E-12 | 57.80% | 0.121 | SignalP-TM (SIGNALP_GRAM_POSITIVE)                                                                                                                                                                                                                                                                                                                                                                                                                                       |
| 603 | 229263_length_354_cvg_3.6_tip_1_0 | 13 | zinc c2h2 type domain-containing protein            | 118 | 7.72E-16 | 58.30% | 0.099 | IPR015880 (SMART); IPR013087 (G3DSA:3.30.160.GENE3D); IPR013087 (G3DSA:3.30.160.GENE3D); PF13465 (PFAM); PTHR24409:SF14 (PANTHER); PTHR24409 (PANTHER); IPR007087 (PROSITE_PATTERNS); IPR007087 (PROSITE_PATTERNS); IPR007087 (PROSITE_PROFILES); IPR007087 (PROSITE_PROFILES); SSF57667 (SUPERFAMILY)                                                                                                                                                                   |
| 609 | 229860_length_356_cvg_2.6_tip_1_2 | 8  | zinc finger protein 699-like isoform x2             | 118 | 3.25E-22 | 61.80% | 0.106 | IPR015880 (SMART); IPR013087 (G3DSA:3.30.160.GENE3D); PF13465 (PFAM); IPR013087 (G3DSA:3.30.160.GENE3D); PTHR24409:SF13 (PANTHER); PTHR24409 (PANTHER); IPR007087 (PROSITE_PATTERNS); IPR007087 (PROSITE_PATTERNS); IPR007087 (PROSITE_PATTERNS); IPR007087 (PROSITE_PATTERNS); IPR007087 (PROSITE_PROFILES); IPR007087 (PROSITE_PROFILES); IPR007087 (PROSITE_PROFILES); IPR007087 (PROSITE_PROFILES); SSF57667 (SUPERFAMILY); SSF57667 (SUPERFAMILY)                   |
| 610 | 229898_length_356_cvg_2.0_tip_1_2 | 10 | moxd1 homolog 1                                     | 118 | 2.92E-31 | 67.30% | 0.097 | IPR014784 (G3DSA:2.60.120.GENE3D); PF03712 (PFAM); IPR000945 (PANTHER); IPR008977 (SUPERFAMILY)                                                                                                                                                                                                                                                                                                                                                                          |
| 604 | 229396_length_355_cvg_3.8_tip_1_3 | 16 | tyrosine-protein kinase src64b                      | 119 | 2.61E-61 | 90.20% | 0.118 | IPR001245 (PRINTS); IPR020635 (SMART); IPR001245 (PFAM); G3DSA:1.10.510.10 (GENE3D); PTHR24418 (PANTHER); IPR008266 (PROSITE_PATTERNS); IPR000719 (PROSITE_PROFILES); IPR011009 (SUPERFAMILY)                                                                                                                                                                                                                                                                            |



|     |                                    |    |                                                                                                                                                                           |     |          |        |       |                                                                                                                                                                                                                                                                                                                                                                                                                                                                                    |
|-----|------------------------------------|----|---------------------------------------------------------------------------------------------------------------------------------------------------------------------------|-----|----------|--------|-------|------------------------------------------------------------------------------------------------------------------------------------------------------------------------------------------------------------------------------------------------------------------------------------------------------------------------------------------------------------------------------------------------------------------------------------------------------------------------------------|
| 605 | 229518_length_355_cvg_2.0_tip_1_0  | 9  | limbic system-associated membrane protein                                                                                                                                 | 119 | 3.71E-40 | 74.40% | 0.108 | IPR003599 (SMART); IPR003598 (SMART); IPR013098 (PFAM); IPR013783 (G3DSA:2.60.40.GENE3D); PTHR19831 (PANTHER); PTHR19831:SF45 (PANTHER); IPR007110 (PROSITE_PROFILES); SSF48726 (SUPERFAMILY)                                                                                                                                                                                                                                                                                      |
| 606 | 229700_length_356_cvg_3.0_tip_1_1  | 10 | phosphatidylinositol -trisphosphate 3-phosphatase and dual-specificity protein phosphatase pten                                                                           | 119 | 2.69E-46 | 86.70% | 0.214 | IPR029021 (G3DSA:3.90.190.GENE3D); PTHR12305 (PANTHER); IPR029023 (PROSITE_PROFILES); IPR029021 (SUPERFAMILY)                                                                                                                                                                                                                                                                                                                                                                      |
| 607 | 229786_length_356_cvg_7.0_tip_1_1  | 29 | frizzled-4                                                                                                                                                                | 119 | 3.60E-49 | 87.10% | 0.145 | IPR020067 (SMART); IPR020067 (G3DSA:1.10.2000.GENE3D); IPR020067 (PFAM); IPR015526 (PANTHER); IPR026551 (PTHR11309:PANTHER); IPR020067 (PROSITE_PROFILES); IPR020067 (SUPERFAMILY)                                                                                                                                                                                                                                                                                                 |
| 608 | 229800_length_356_cvg_3.0_tip_1_1  | 13 | zinc finger protein 271 (zinc finger protein 7) (zinc finger protein znfphe133) (epstein-barr virus-induced zinc finger protein) (znf-eb) (ct-zfp48) (zinc finger protein | 119 | 1.43E-14 | 51.50% | 0.136 | IPR015880 (SMART); IPR013087 (G3DSA:3.30.160.GENE3D); IPR013087 (G3DSA:3.30.160.GENE3D); PF13894 (PFAM); PF13465 (PFAM); PTHR24409 (PANTHER); PTHR24409:SF14 (PANTHER); IPR007087 (PROSITE_PATTERNS); IPR007087 (PROSITE_PATTERNS); IPR007087 (PROSITE_PATTERNS); IPR007087 (PROSITE_PROFILES); IPR007087 (PROSITE_PROFILES); SSF57667 (SUPERFAMILY); SSF57667 (SUPERFAMILY)                                                                                                       |
| 611 | 229988_length_357_cvg_2.0_tip_1_4  | 7  | zinc finger                                                                                                                                                               | 119 | 1.48E-62 | 85.90% | 0.109 | IPR015880 (SMART); IPR013087 (G3DSA:3.30.160.GENE3D); IPR007087 (PFAM); IPR013087 (G3DSA:3.30.160.GENE3D); PTHR23228 (PANTHER); PTHR23228:SF78 (PANTHER); IPR007087 (PROSITE_PATTERNS); IPR007087 (PROSITE_PATTERNS); IPR007087 (PROSITE_PROFILES); IPR007087 (PROSITE_PROFILES); SSF57667 (SUPERFAMILY); SSF57667 (SUPERFAMILY)                                                                                                                                                   |
| 612 | 230108_length_357_cvg_3.0_tip_1_2  | 10 | thrombospondin type-1 domain-containing protein 4-like                                                                                                                    | 119 | 3.43E-41 | 77.10% | 0.106 | IPR010294 (PFAM); PTHR13723 (PANTHER)                                                                                                                                                                                                                                                                                                                                                                                                                                              |
| 613 | 230162_length_357_cvg_2.0_tip_1_1  | 9  | zinc finger protein 519- partial                                                                                                                                          | 119 | 3.21E-23 | 60.00% | 0.108 | IPR015880 (SMART); IPR013087 (G3DSA:3.30.160.GENE3D); IPR013087 (G3DSA:3.30.160.GENE3D); IPR013087 (G3DSA:3.30.160.GENE3D); PF13894 (PFAM); IPR013087 (G3DSA:3.30.160.GENE3D); IPR007087 (PFAM); PTHR24409 (PANTHER); PTHR24409:SF14 (PANTHER); IPR007087 (PROSITE_PATTERNS); IPR007087 (PROSITE_PATTERNS); IPR007087 (PROSITE_PATTERNS); IPR007087 (PROSITE_PROFILES); IPR007087 (PROSITE_PROFILES); IPR007087 (PROSITE_PROFILES); SSF57667 (SUPERFAMILY); SSF57667 (SUPERFAMILY) |
| 614 | 230196_length_357_cvg_6.4_tip_1_2  | 22 | hypothetical protein JL09_g3666                                                                                                                                           | 119 | 1.23E-07 | 54.00% | 0.102 | no IPS match                                                                                                                                                                                                                                                                                                                                                                                                                                                                       |
| 615 | 230340_length_357_cvg_3.5_tip_1_2  | 12 | maguk p55 subfamily member 5                                                                                                                                              | 119 | 5.48E-44 | 79.50% | 0.108 | G3DSA:2.30.30.40 (GENE3D); PTHR23122 (PANTHER); PTHR23122:SF32 (PANTHER)                                                                                                                                                                                                                                                                                                                                                                                                           |
| 617 | 230394_length_358_cvg_2.0_tip_1_1  | 9  | xanthine dehydrogenase oxidase isoform x1                                                                                                                                 | 119 | 2.71E-54 | 82.90% | 0.164 | IPR008274 (PFAM); IPR008274 (G3DSA:3.30.365.GENE3D); PTHR11908:SF32 (PANTHER); PTHR11908 (PANTHER); IPR022407 (PROSITE_PATTERNS); IPR008274 (SUPERFAMILY)                                                                                                                                                                                                                                                                                                                          |
| 618 | 230436_length_358_cvg_3.0_tip_1_5  | 13 | transient receptor potential channel pyrexia-like                                                                                                                         | 119 | 2.19E-51 | 88.20% | 0.129 | IPR002110 (SMART); IPR020683 (G3DSA:1.25.40.GENE3D); IPR020683 (PFAM); PTHR24133 (PANTHER); IPR002110 (PROSITE_PROFILES); IPR020683 (PROSITE_PROFILES); IPR002110 (PROSITE_PROFILES); IPR020683 (SUPERFAMILY)                                                                                                                                                                                                                                                                      |
| 620 | 230594_length_358_cvg_2.0_tip_1_2  | 8  | subfamily member 17                                                                                                                                                       | 119 | 3.63E-45 | 82.30% | 0.105 | Coil (COILS); IPR001623 (PRINTS); IPR001623 (SMART); IPR001623 (PFAM); IPR001623 (G3DSA:1.10.287.GENE3D); PTHR24078 (PANTHER); PTHR24078:SF153 (PANTHER); IPR001623 (PROSITE_PROFILES); IPR001623 (SUPERFAMILY)                                                                                                                                                                                                                                                                    |
| 616 | 230384_length_358_cvg_3.0_tip_1_3  | 13 | Le-cadherin                                                                                                                                                               | 120 | 4.56E-28 | 61.00% | 0.109 | no IPS match                                                                                                                                                                                                                                                                                                                                                                                                                                                                       |
| 619 | 230496_length_358_cvg_2.4_tip_1_3  | 8  | chorion peroxidase                                                                                                                                                        | 120 | 2.17E-48 | 72.00% | 0.112 | IPR019791 (PFAM); IPR019791 (G3DSA:1.10.640.GENE3D); PTHR11475 (PANTHER); IPR019791 (PROSITE_PROFILES); IPR010255 (SUPERFAMILY)                                                                                                                                                                                                                                                                                                                                                    |
| 621 | 230728_length_359_cvg_2.0_tip_1_3  | 10 | protein ndnf-like                                                                                                                                                         | 120 | 2.30E-17 | 49.30% | 0.12  | IPR013783 (G3DSA:2.60.40.GENE3D)                                                                                                                                                                                                                                                                                                                                                                                                                                                   |
| 622 | 230872_length_359_cvg_21.7_tip_0_3 | 63 | nidogen-2 isoform x2                                                                                                                                                      | 120 | 3.18E-15 | 59.70% | 0.101 | IPR002223 (G3DSA:4.10.410.GENE3D); IPR002223 (PFAM); IPR023413 (G3DSA:2.40.155.GENE3D); IPR024731 (PFAM); IPR020901 (PROSITE_PATTERNS); IPR013032 (PROSITE_PATTERNS); IPR013032 (PROSITE_PATTERNS); IPR002223 (PROSITE_PROFILES); IPR000742 (PROSITE_PROFILES); IPR002223 (SUPERFAMILY)                                                                                                                                                                                            |
| 623 | 231046_length_360_cvg_2.0_tip_1_1  | 9  | beta- -n-acetylgalactosaminyltransferase bre-4-like                                                                                                                       | 120 | 4.79E-43 | 69.20% | 0.123 | IPR027791 (PFAM); IPR029044 (G3DSA:3.90.550.GENE3D); IPR003859 (PANTHER); IPR029044 (SUPERFAMILY)                                                                                                                                                                                                                                                                                                                                                                                  |
| 624 | 231272_length_360_cvg_3.0_tip_1_1  | 11 | gastrula zinc finger protein - partial                                                                                                                                    | 120 | 5.78E-42 | 68.70% | 0.106 | IPR015880 (SMART); IPR013087 (G3DSA:3.30.160.GENE3D); IPR013087 (G3DSA:3.30.160.GENE3D); PF13912 (PFAM); IPR013087 (G3DSA:3.30.160.GENE3D); PF13465 (PFAM); PTHR24409 (PANTHER); IPR007087 (PROSITE_PATTERNS); IPR007087 (PROSITE_PATTERNS); IPR007087 (PROSITE_PATTERNS); IPR007087 (PROSITE_PATTERNS); IPR007087 (PROSITE_PROFILES); IPR007087 (PROSITE_PROFILES); IPR007087 (PROSITE_PROFILES); SSF57667 (SUPERFAMILY); SSF57667 (SUPERFAMILY); SSF57667 (SUPERFAMILY)          |

|     |                                    |     |                                                                       |     |          |        |         |                                                                                                                                                                                                                                                                                                                                                                                                                                                 |
|-----|------------------------------------|-----|-----------------------------------------------------------------------|-----|----------|--------|---------|-------------------------------------------------------------------------------------------------------------------------------------------------------------------------------------------------------------------------------------------------------------------------------------------------------------------------------------------------------------------------------------------------------------------------------------------------|
| 625 | 231286_length_361_cvg_3.0_tip_1_5  | 11  | lysosomal pro-x carboxypeptidase-like                                 | 120 | 2.03E-21 | 75.00% | 0.134   | IPR008758 (PFAM); PTHR11010:SF11 (PANTHER); IPR008758 (PANTHER); CYTOPLASMIC_DOMAIN (PHOBIUS); TRANSMEMBRANE (PHOBIUS); NON_CYTOPLASMIC_DOMAIN (PHOBIUS); TMhelix (TMHMM)                                                                                                                                                                                                                                                                       |
| 626 | 231358_length_361_cvg_2.0_tip_1_1  | 9   | zinc finger protein 37-like                                           | 120 | 3.07E-16 | 60.00% | 0.104   | IPR015880 (SMART); IPR013087 (G3DSA:3.30.160.GENE3D); PF13465 (PFAM); IPR007087 (PFAM); IPR013087 (G3DSA:3.30.160.GENE3D); IPR013087 (G3DSA:3.30.160.GENE3D); PTHR24409:SF14 (PANTHER); PTHR24409 (PANTHER); IPR007087 (PROSITE_PATTERNS); IPR007087 (PROSITE_PATTERNS); IPR007087 (PROSITE_PATTERNS); IPR007087 (PROSITE_PROFILES); IPR007087 (PROSITE_PROFILES); IPR007087 (PROSITE_PROFILES); SSF57667 (SUPERFAMILY); SSF57667 (SUPERFAMILY) |
| 627 | 231392_length_361_cvg_7.1_tip_1_4  | 24  | lysosomal alpha-glucosidase-like                                      | 120 | 4.72E-51 | 78.00% | 0.109   | IPR000322 (PFAM); PTHR22762:SF7 (PANTHER); PTHR22762 (PANTHER); IPR017853 (SUPERFAMILY)                                                                                                                                                                                                                                                                                                                                                         |
| 628 | 231532_length_361_cvg_2.5_tip_1_4  | 10  | limbic system-associated membrane protein                             | 120 | 3.14E-34 | 67.50% | 0.098   | IPR013783 (G3DSA:2.60.40.GENE3D); IPR013098 (PFAM); IPR013783 (G3DSA:2.60.40.GENE3D); PTHR19831:SF47 (PANTHER); PTHR19831 (PANTHER); IPR007110 (PROSITE_PROFILES); SSF48726 (SUPERFAMILY); SSF48726 (SUPERFAMILY)                                                                                                                                                                                                                               |
| 631 | 231628_length_362_cvg_4.0_tip_1_5  | 17  | nardilysin-like isoform x1                                            | 120 | 5.02E-34 | 72.10% | 0.125   | IPR011237 (G3DSA:3.30.830.GENE3D); IPR007863 (PFAM); PTHR11851 (PANTHER); PTHR11851:SF108 (PANTHER); IPR011249 (SUPERFAMILY)                                                                                                                                                                                                                                                                                                                    |
| 629 | 231560_length_361_cvg_4.7_tip_1_0  | 20  | c4b-binding protein beta                                              | 121 | 8.43E-58 | 83.70% | 0.181   | IPR013783 (G3DSA:2.60.40.GENE3D); SSF48726 (SUPERFAMILY)                                                                                                                                                                                                                                                                                                                                                                                        |
| 630 | 231590_length_361_cvg_2.0_tip_1_0  | 5   | proprotein convertase subtilisin kexin type 7 isoform x2              | 121 | 7.64E-55 | 81.50% | 0.106   | IPR000209 (PFAM); IPR000209 (G3DSA:3.40.50.GENE3D); IPR015500 (PANTHER); PTHR10795:SF9 (PANTHER); IPR000209 (SUPERFAMILY)                                                                                                                                                                                                                                                                                                                       |
| 632 | 231698_length_362_cvg_60.5_tip_0_3 | 467 | blastula protease 10-like                                             | 121 | 4.46E-37 | 69.10% | 0.108   | IPR001506 (PRINTS); IPR006026 (SMART); IPR024079 (G3DSA:3.40.390.GENE3D); IPR001506 (PFAM); PTHR10127 (PANTHER); SSF55486 (SUPERFAMILY)                                                                                                                                                                                                                                                                                                         |
| 633 | 231738_length_362_cvg_2.0_tip_1_4  | 7   | ring finger and spry domain-containing protein 1-like                 | 121 | 4.95E-15 | 81.10% | 0.12    | IPR001841 (SMART); IPR013083 (G3DSA:3.30.40.GENE3D); PF13920 (PFAM); IPR001841 (PROSITE_PROFILES); SSF57850 (SUPERFAMILY)                                                                                                                                                                                                                                                                                                                       |
| 634 | 231760_length_362_cvg_2.0_tip_1_3  | 8   | cartilage oligomeric matrix protein isoform x1                        | 121 | 3.72E-26 | 58.90% | 0.1     | Coil (COILS); IPR024665 (PFAM)                                                                                                                                                                                                                                                                                                                                                                                                                  |
| 635 | 231876_length_362_cvg_2.0_tip_1_4  | 10  | carbohydrate sulfotransferase 11 isoform x1                           | 121 | 4.59E-19 | 64.80% | 0.128   | IPR005531 (PFAM); PTHR12137:SF29 (PANTHER); IPR018011 (PANTHER)                                                                                                                                                                                                                                                                                                                                                                                 |
| 636 | 232106_length_363_cvg_7.4_tip_1_3  | 25  | peptidase inhibitor 16                                                | 121 | 2.30E-14 | 54.70% | 0.151   | IPR001283 (PRINTS); IPR014044 (G3DSA:3.40.33.GENE3D); IPR014044 (PFAM); IPR001283 (PANTHER); IPR018244 (PROSITE_PATTERNS); IPR014044 (SUPERFAMILY)                                                                                                                                                                                                                                                                                              |
| 637 | 232128_length_363_cvg_2.0_tip_1_1  | 9   | nedd4 family-interacting protein 1-like                               | 121 | 5.46E-43 | 68.30% | 0.269   | IPR019325 (PFAM); PTHR13396 (PANTHER); TRANSMEMBRANE (PHOBIUS); NON_CYTOPLASMIC_DOMAIN (PHOBIUS); TRANSMEMBRANE (PHOBIUS); NON_CYTOPLASMIC_DOMAIN (PHOBIUS); CYTOPLASMIC_DOMAIN (PHOBIUS); TMhelix (TMHMM)                                                                                                                                                                                                                                      |
| 638 | 232190_length_363_cvg_3.0_tip_1_5  | 7   | heat shock protein 70                                                 | 121 | 3.14E-44 | 80.10% | 0.097   | Coil (COILS); IPR029048 (G3DSA:1.20.1270.GENE3D); IPR029047 (G3DSA:2.60.34.GENE3D); IPR013126 (PFAM); PTHR19375 (PANTHER); IPR029048 (SUPERFAMILY); IPR029047 (SUPERFAMILY)                                                                                                                                                                                                                                                                     |
| 639 | 232216_length_363_cvg_6.0_tip_1_1  | 23  | trafficking protein particle complex subunit 1                        | 121 | 1.70E-63 | 86.80% | 0.167   | IPR007233 (PFAM); G3DSA:3.30.450.70 (GENE3D); PTHR23249:SF16 (PANTHER); IPR007233 (PANTHER); IPR011012 (SUPERFAMILY)                                                                                                                                                                                                                                                                                                                            |
| 641 | 232338_length_364_cvg_3.7_tip_1_2  | 14  | trafficking protein particle complex subunit 1-like isoform x3        | 121 | 2.34E-08 | 71.00% | 0.112   | IPR007233 (PFAM)                                                                                                                                                                                                                                                                                                                                                                                                                                |
| 643 | 232506_length_364_cvg_3.6_tip_1_2  | 14  | mam and ldl-receptor class a domain-containing protein c10orf112-like | 121 | 2.84E-06 | 52.50% | 0.103   | IPR000998 (PFAM); IPR000998 (PROSITE_PROFILES); IPR013320 (SUPERFAMILY)                                                                                                                                                                                                                                                                                                                                                                         |
| 640 | 232244_length_364_cvg_2.0_tip_1_0  | 8   | low-density lipoprotein receptor-related protein 4-like               | 122 | 6.83E-06 | 63.17% | 0.119   | IPR002172 (SMART); IPR002172 (G3DSA:4.10.400.GENE3D); IPR002172 (PFAM); CYTOPLASMIC_DOMAIN (PHOBIUS); NON_CYTOPLASMIC_DOMAIN (PHOBIUS); TRANSMEMBRANE (PHOBIUS); IPR002172 (PROSITE_PROFILES); IPR002172 (SUPERFAMILY)                                                                                                                                                                                                                          |
| 642 | 232426_length_364_cvg_2.0_tip_1_0  | 7   | h aca ribonucleoprotein complex non-core subunit naf1                 | 122 | 3.70E-48 | 79.30% | 0.379 Y | G3DSA:2.40.10.230 (GENE3D); IPR007504 (PFAM); PTHR31991 (PANTHER); IPR009000 (SUPERFAMILY)                                                                                                                                                                                                                                                                                                                                                      |
| 644 | 232852_length_366_cvg_2.0_tip_1_3  | 10  | inversin- partial                                                     | 122 | 3.09E-40 | 73.40% | 0.143   | IPR002110 (SMART); IPR020683 (PFAM); PF13637 (PFAM); IPR020683 (G3DSA:1.25.40.GENE3D); IPR020683 (G3DSA:1.25.40.GENE3D); PTHR24178 (PANTHER); IPR002110 (PROSITE_PROFILES); IPR002110 (PROSITE_PROFILES); IPR002110 (PROSITE_PROFILES); IPR002110 (PROSITE_PROFILES); IPR002110 (PROSITE_PROFILES); IPR020683 (SUPERFAMILY)                                                                                                                     |
| 645 | 232870_length_366_cvg_3.0_tip_1_2  | 13  | secreted frizzled-related protein 3                                   | 122 | 5.59E-16 | 59.00% | 0.137   | Coil (COILS); IPR018933 (SMART); G3DSA:2.40.50.120 (GENE3D); IPR018933 (PFAM); PTHR11309:SF83 (PANTHER); IPR015526 (PANTHER); IPR001134 (PROSITE_PROFILES); IPR008993 (SUPERFAMILY)                                                                                                                                                                                                                                                             |
| 646 | 232906_length_366_cvg_3.0_tip_1_3  | 13  | dehydrogenase reductase sdr family member on chromosome x             | 122 | 3.17E-33 | 68.60% | 0.114   | IPR016040 (G3DSA:3.40.50.GENE3D); IPR002198 (PFAM); PTHR24320 (PANTHER); SSF51735 (SUPERFAMILY)                                                                                                                                                                                                                                                                                                                                                 |
| 647 | 232944_length_366_cvg_4.2_tip_1_4  | 16  | laccase 1 isoform x1                                                  | 122 | 1.85E-42 | 73.70% | 0.13    | IPR008972 (G3DSA:2.60.40.GENE3D); IPR001117 (PFAM); PTHR11709:SF33 (PANTHER); PTHR11709 (PANTHER); IPR008972 (SUPERFAMILY)                                                                                                                                                                                                                                                                                                                      |
| 648 | 233048_length_366_cvg_3.0_tip_1_0  | 10  | exocyst complex component 7                                           | 122 | 6.07E-37 | 77.70% | 0.105   | PTHR12542:SF7 (PANTHER); IPR004140 (PANTHER)                                                                                                                                                                                                                                                                                                                                                                                                    |

|     |                                    |     |                                                                      |     |          |        |         |                                                                                                                                                                                                                                                                                                                                                                                                                                                                                                                                   |
|-----|------------------------------------|-----|----------------------------------------------------------------------|-----|----------|--------|---------|-----------------------------------------------------------------------------------------------------------------------------------------------------------------------------------------------------------------------------------------------------------------------------------------------------------------------------------------------------------------------------------------------------------------------------------------------------------------------------------------------------------------------------------|
| 649 | 233188_length_367_cvg_3.0_tip_1_4  | 12  | gamma-glutamyltranspeptidase 1-like                                  | 122 | 2.08E-23 | 57.10% | 0.238   | IPR000101 (PRINTS); IPR000101 (PFAM); IPR000101 (PANTHER); PTHR11686:SF18 (PANTHER); IPR029055 (SUPERFAMILY)                                                                                                                                                                                                                                                                                                                                                                                                                      |
| 650 | 233386_length_368_cvg_2.0_tip_1_2  | 8   | rega-1 protein                                                       | 122 | 2.59E-08 | 52.20% | 0.129   | IPR003599 (SMART); IPR003598 (SMART); IPR013783 (G3DSA:2.60.40.GENE3D); IPR013098 (PFAM); PTHR19831 (PANTHER); IPR007110 (PROSITE_PROFILES); SSF48726 (SUPERFAMILY)                                                                                                                                                                                                                                                                                                                                                               |
| 652 | 233436_length_368_cvg_2.0_tip_1_2  | 7   | deoxyribonuclease-2- partial                                         | 122 | 2.97E-17 | 67.60% | 0.115   | IPR004947 (PFAM); IPR004947 (PANTHER)                                                                                                                                                                                                                                                                                                                                                                                                                                                                                             |
| 651 | 233418_length_368_cvg_5.0_tip_1_0  | 16  | metalloprotease i                                                    | 123 | 6.43E-16 | 57.10% | 0.118   | IPR013856 (PFAM); IPR013856 (G3DSA:3.10.170.GENE3D)                                                                                                                                                                                                                                                                                                                                                                                                                                                                               |
| 653 | 233498_length_368_cvg_3.0_tip_1_4  | 12  | zinc finger protein 628                                              | 123 | 1.22E-10 | 71.60% | 0.114   | IPR015880 (SMART); IPR013087 (G3DSA:3.30.160.GENE3D); PF13465 (PFAM); IPR013087 (G3DSA:3.30.160.GENE3D); PTHR24409 (PANTHER); IPR007087 (PROSITE_PATTERNS); IPR007087 (PROSITE_PROFILES); SSF57667 (SUPERFAMILY)                                                                                                                                                                                                                                                                                                                  |
| 654 | 233610_length_369_cvg_3.0_tip_1_1  | 13  | dnaj homolog subfamily c member 11                                   | 123 | 2.60E-55 | 90.00% | 0.103   | IPR001623 (PRINTS); IPR001623 (SMART); IPR001623 (PFAM); IPR001623 (G3DSA:1.10.287.GENE3D); PTHR24078 (PANTHER); PTHR24078:SF159 (PANTHER); IPR001623 (PROSITE_PROFILES); IPR001623 (SUPERFAMILY)                                                                                                                                                                                                                                                                                                                                 |
| 655 | 233618_length_369_cvg_2.0_tip_1_0  | 8   | zinc finger partial                                                  | 123 | 4.06E-23 | 58.00% | 0.098   | IPR015880 (SMART); PF13894 (PFAM); PF13465 (PFAM); IPR013087 (G3DSA:3.30.160.GENE3D); IPR013087 (G3DSA:3.30.160.GENE3D); IPR013087 (G3DSA:3.30.160.GENE3D); PTHR24409:SF14 (PANTHER); PTHR24409 (PANTHER); IPR007087 (PROSITE_PATTERNS); IPR007087 (PROSITE_PATTERNS); IPR007087 (PROSITE_PATTERNS); IPR007087 (PROSITE_PATTERNS); IPR007087 (PROSITE_PROFILES); IPR007087 (PROSITE_PROFILES); IPR007087 (PROSITE_PROFILES); IPR007087 (PROSITE_PROFILES); SSF57667 (SUPERFAMILY); SSF57667 (SUPERFAMILY); SSF57667 (SUPERFAMILY) |
| 656 | 233818_length_369_cvg_2.0_tip_1_0  | 8   | vascular endothelial growth factor receptor 1                        | 123 | 4.07E-15 | 47.30% | 0.141   | PF13895 (PFAM); IPR013783 (G3DSA:2.60.40.GENE3D); SSF48726 (SUPERFAMILY)                                                                                                                                                                                                                                                                                                                                                                                                                                                          |
| 657 | 233826_length_369_cvg_2.0_tip_1_0  | 10  | cardioactive peptide                                                 | 123 | 2.67E-11 | 60.50% | 0.106   | IPR024276 (PFAM); TRANSMEMBRANE (PHOBIUS); NON_CYTOPLASMIC_DOMAIN (PHOBIUS); CYTOPLASMIC_DOMAIN (PHOBIUS); IPR024276 (PRODOM); TMhelix (TMHMM)                                                                                                                                                                                                                                                                                                                                                                                    |
| 658 | 233848_length_369_cvg_2.0_tip_1_1  | 9   | membrane metallo-endopeptidase-like 1-like                           | 123 | 3.16E-33 | 69.80% | 0.108   | G3DSA:1.10.1380.10 (GENE3D); IPR008753 (PFAM); IPR000718 (PANTHER); PTHR11733:SF113 (PANTHER); SSF55486 (SUPERFAMILY)                                                                                                                                                                                                                                                                                                                                                                                                             |
| 661 | 234068_length_370_cvg_2.9_tip_1_4  | 11  | endochitinase isoform x1                                             | 123 | 4.71E-45 | 86.20% | 0.104   | IPR013781 (G3DSA:3.20.20.GENE3D); IPR001223 (PFAM); PTHR11177 (PANTHER); PTHR11177:SF144 (PANTHER); IPR017853 (SUPERFAMILY)                                                                                                                                                                                                                                                                                                                                                                                                       |
| 659 | 233910_length_370_cvg_43.9_tip_1_3 | 155 | thioredoxin 1                                                        | 124 | 8.45E-38 | 85.50% | 0.126   | IPR013766 (PFAM); IPR012336 (G3DSA:3.40.30.GENE3D); IPR005746 (PANTHER); IPR012336 (PROSITE_PROFILES); IPR012336 (SUPERFAMILY)                                                                                                                                                                                                                                                                                                                                                                                                    |
| 660 | 234056_length_370_cvg_3.0_tip_1_3  | 10  | protein fam3c-like                                                   | 124 | 1.48E-31 | 65.30% | 0.113   | PTHR14592:SF7 (PANTHER); IPR026101 (PANTHER)                                                                                                                                                                                                                                                                                                                                                                                                                                                                                      |
| 662 | 234082_length_370_cvg_4.5_tip_0_0  | 16  | protein creg1                                                        | 124 | 9.68E-50 | 74.40% | 0.117   | PF13883 (PFAM); IPR012349 (G3DSA:2.30.110.GENE3D); PTHR13343 (PANTHER); PTHR13343:SF12 (PANTHER); IPR012349 (SUPERFAMILY)                                                                                                                                                                                                                                                                                                                                                                                                         |
| 663 | 234256_length_371_cvg_2.0_tip_1_1  | 7   | n-alpha-acetyltransferase auxiliary subunit                          | 124 | 3.12E-35 | 64.70% | 0.176   | IPR019183 (PFAM); PTHR22767 (PANTHER); PTHR22767:SF3 (PANTHER)                                                                                                                                                                                                                                                                                                                                                                                                                                                                    |
| 664 | 234290_length_371_cvg_2.0_tip_1_1  | 6   | irregular chiasm c-roughest protein isoform x1                       | 124 | 1.58E-42 | 71.60% | 0.135   | IPR003598 (SMART); IPR003599 (SMART); IPR013098 (PFAM); IPR013783 (G3DSA:2.60.40.GENE3D); PTHR11640 (PANTHER); PTHR11640:SF54 (PANTHER); IPR007110 (PROSITE_PROFILES); SSF48726 (SUPERFAMILY)                                                                                                                                                                                                                                                                                                                                     |
| 665 | 234380_length_371_cvg_2.0_tip_1_1  | 10  | glucose dehydrogenase                                                | 124 | 1.31E-37 | 68.70% | 0.108   | IPR000172 (PFAM); G3DSA:3.30.560.10 (GENE3D); G3DSA:3.50.50.60 (GENE3D); PTHR11552 (PANTHER); PTHR11552:SF77 (PANTHER); SSF51905 (SUPERFAMILY)                                                                                                                                                                                                                                                                                                                                                                                    |
| 666 | 234434_length_371_cvg_21.3_tip_0_1 | 93  | acyl- delta desaturase                                               | 124 | 3.98E-65 | 87.00% | 0.478 Y | IPR015876 (PRINTS); IPR005804 (PFAM); PTHR11351:SF28 (PANTHER); PTHR11351 (PANTHER); CYTOPLASMIC_DOMAIN (PHOBIUS); NON_CYTOPLASMIC_DOMAIN (PHOBIUS); TRANSMEMBRANE (PHOBIUS); SignalP-noTM (SIGNALP_EUK); TMhelix (TMHMM)                                                                                                                                                                                                                                                                                                         |
| 667 | 234488_length_372_cvg_5.0_tip_1_2  | 16  | chitinase 1a                                                         | 124 | 2.48E-58 | 82.50% | 0.137   | IPR013781 (G3DSA:3.20.20.GENE3D); IPR001223 (PFAM); IPR029070 (G3DSA:3.10.50.GENE3D); PTHR11177:SF144 (PANTHER); PTHR11177 (PANTHER); IPR017853 (SUPERFAMILY)                                                                                                                                                                                                                                                                                                                                                                     |
| 668 | 234628_length_372_cvg_2.0_tip_1_1  | 12  | 97 kda heat shock protein isoform x2                                 | 124 | 7.30E-42 | 87.80% | 0.133   | G3DSA:3.30.420.40 (GENE3D); IPR013126 (PFAM); G3DSA:3.30.30.30 (GENE3D); PTHR19375:SF78 (PANTHER); PTHR19375 (PANTHER); SSF53067 (SUPERFAMILY)                                                                                                                                                                                                                                                                                                                                                                                    |
| 669 | 234878_length_373_cvg_2.0_tip_1_4  | 8   | basement membrane-specific heparan sulfate proteoglycan core protein | 124 | 1.68E-31 | 65.10% | 0.103   | IPR018031 (SMART); IPR000034 (PFAM); PTHR10574:SF39 (PANTHER); PTHR10574 (PANTHER); IPR000034 (PROSITE_PROFILES)                                                                                                                                                                                                                                                                                                                                                                                                                  |
| 670 | 234888_length_373_cvg_9.0_tip_1_4  | 28  | dipeptidyl peptidase 9                                               | 124 | 1.41E-66 | 91.40% | 0.186   | IPR029058 (G3DSA:3.40.50.GENE3D); IPR001375 (PFAM); PTHR11731:SF110 (PANTHER); PTHR11731 (PANTHER); IPR029058 (SUPERFAMILY)                                                                                                                                                                                                                                                                                                                                                                                                       |
| 671 | 234934_length_373_cvg_5.6_tip_1_1  | 23  | calbindin-32 isoform x2                                              | 124 | 2.67E-75 | 98.00% | 0.106   | IPR002048 (SMART); IPR011992 (PFAM); IPR011992 (G3DSA:1.10.238.GENE3D); IPR002048 (PFAM); IPR011992 (G3DSA:1.10.238.GENE3D); PTHR19972 (PANTHER); IPR018247 (PROSITE_PATTERNS); IPR018247 (PROSITE_PATTERNS); IPR018247 (PROSITE_PATTERNS); IPR002048 (PROSITE_PROFILES); IPR002048 (PROSITE_PROFILES); IPR002048 (PROSITE_PROFILES); SSF47473 (SUPERFAMILY)                                                                                                                                                                      |

|     |                                   |    |                                                                                                                                                                                               |     |          |        |       |                                                                                                                                                                                                                                                                                                                                                                                                                                                                               |
|-----|-----------------------------------|----|-----------------------------------------------------------------------------------------------------------------------------------------------------------------------------------------------|-----|----------|--------|-------|-------------------------------------------------------------------------------------------------------------------------------------------------------------------------------------------------------------------------------------------------------------------------------------------------------------------------------------------------------------------------------------------------------------------------------------------------------------------------------|
| 672 | 235024_length_373_cvg_2.0_tip_1_2 | 7  | zinc finger protein                                                                                                                                                                           | 124 | 1.16E-24 | 56.00% | 0.13  | IPR015880 (SMART); IPR013087 (G3DSA:3.30.160.GENE3D); IPR013087 (G3DSA:3.30.160.GENE3D); IPR007087 (PFAM); PF13894 (PFAM); IPR013087 (G3DSA:3.30.160.GENE3D); PTHR24409:SF14 (PANTHER); PTHR24409 (PANTHER); IPR007087 (PROSITE_PATTERNS); IPR007087 (PROSITE_PATTERNS); IPR007087 (PROSITE_PATTERNS); IPR007087 (PROSITE_PROFILES); IPR007087 (PROSITE_PROFILES); IPR007087 (PROSITE_PROFILES); IPR007087 (PROSITE_PROFILES); SSF57667 (SUPERFAMILY); SSF57667 (SUPERFAMILY) |
| 675 | 235188_length_374_cvg_3.0_tip_1_2 | 9  | hemacentin-2                                                                                                                                                                                  | 124 | 1.26E-23 | 63.00% | 0.109 | IPR000742 (SMART); IPR001881 (SMART); G3DSA:2.10.25.10 (GENE3D); G3DSA:2.10.25.10 (GENE3D); IPR026823 (PFAM); PTHR19897:SF158 (PANTHER); PTHR19897 (PANTHER); IPR000152 (PROSITE_PATTERNS); IPR018097 (PROSITE_PATTERNS); IPR013032 (PROSITE_PATTERNS); IPR000742 (PROSITE_PROFILES); SSF57196 (SUPERFAMILY)                                                                                                                                                                  |
| 673 | 235044_length_374_cvg_3.0_tip_1_0 | 11 | epidermal growth factor receptor-like                                                                                                                                                         | 125 | 1.18E-37 | 66.20% | 0.104 | IPR006212 (SMART); G3DSA:2.10.220.10 (GENE3D); IPR009030 (SUPERFAMILY)                                                                                                                                                                                                                                                                                                                                                                                                        |
| 674 | 235134_length_374_cvg_4.0_tip_1_4 | 14 | reelin-like isoform x4                                                                                                                                                                        | 125 | 8.08E-42 | 63.40% | 0.105 | PTHR11841 (PANTHER)                                                                                                                                                                                                                                                                                                                                                                                                                                                           |
| 676 | 235232_length_374_cvg_2.7_tip_1_3 | 11 | chondroitin sulfate                                                                                                                                                                           | 125 | 1.33E-43 | 74.30% | 0.165 | IPR029044 (G3DSA:3.90.550.GENE3D); IPR008428 (PFAM); PTHR12369:SF11 (PANTHER); PTHR12369 (PANTHER); IPR029044 (SUPERFAMILY)                                                                                                                                                                                                                                                                                                                                                   |
| 677 | 235398_length_375_cvg_8.0_tip_1_3 | 36 | zinc finger protein 3-like isoform x1                                                                                                                                                         | 125 | 3.43E-17 | 68.80% | 0.117 | IPR015880 (SMART); IPR013087 (G3DSA:3.30.160.GENE3D); IPR013087 (G3DSA:3.30.160.GENE3D); PF13465 (PFAM); IPR013087 (G3DSA:3.30.160.GENE3D); PTHR24409 (PANTHER); IPR007087 (PROSITE_PATTERNS); IPR007087 (PROSITE_PATTERNS); IPR007087 (PROSITE_PROFILES); IPR007087 (PROSITE_PROFILES); SSF57667 (SUPERFAMILY)                                                                                                                                                               |
| 678 | 235448_length_375_cvg_2.0_tip_1_4 | 10 | dual specificity testis-specific protein kinase 2                                                                                                                                             | 125 | 3.36E-57 | 83.70% | 0.15  | IPR002290 (SMART); G3DSA:1.10.510.10 (GENE3D); IPR001245 (PFAM); PTHR23257 (PANTHER); PTHR23257:SF324 (PANTHER); IPR008266 (PROSITE_PATTERNS); IPR000719 (PROSITE_PROFILES); IPR011009 (SUPERFAMILY)                                                                                                                                                                                                                                                                          |
| 679 | 235462_length_375_cvg_5.7_tip_1_2 | 35 | va52_dolma ame: full=venom allergen ame: full=allergen dol m v-a ame: full=antigen 5 form 2 short=ag5-2 ame: full=cysteine-rich venom protein short=crvp ame: allergen=dol m flags: precursor | 125 | 1.26E-06 | 56.40% | 0.31  | IPR014044 (G3DSA:3.40.33.GENE3D)                                                                                                                                                                                                                                                                                                                                                                                                                                              |
| 680 | 235512_length_375_cvg_2.7_tip_1_1 | 10 | zinc finger protein                                                                                                                                                                           | 125 | 2.37E-22 | 58.50% | 0.1   | IPR015880 (SMART); IPR013087 (G3DSA:3.30.160.GENE3D); PF13894 (PFAM); IPR013087 (G3DSA:3.30.160.GENE3D); PF13465 (PFAM); IPR007087 (PFAM); PTHR24409:SF14 (PANTHER); PTHR24409 (PANTHER); IPR007087 (PROSITE_PATTERNS); IPR007087 (PROSITE_PATTERNS); IPR007087 (PROSITE_PATTERNS); IPR007087 (PROSITE_PROFILES); IPR007087 (PROSITE_PROFILES); IPR007087 (PROSITE_PROFILES); IPR007087 (PROSITE_PROFILES); SSF57667 (SUPERFAMILY); SSF57667 (SUPERFAMILY)                    |
| 681 | 235564_length_376_cvg_5.4_tip_1_1 | 21 | zinc finger protein zpr1                                                                                                                                                                      | 125 | 3.25E-48 | 77.10% | 0.1   | IPR004457 (SMART); IPR004457 (TIGRFAM); IPR004457 (PFAM); PTHR10876 (PANTHER); PTHR10876:SF0 (PANTHER)                                                                                                                                                                                                                                                                                                                                                                        |
| 682 | 235900_length_377_cvg_3.5_tip_1_2 | 19 | trypsin-1-like isoform x2                                                                                                                                                                     | 125 | 6.54E-27 | 69.70% | 0.33  | IPR001254 (SMART); IPR001254 (PFAM); G3DSA:2.40.10.10 (GENE3D); PTHR24256 (PANTHER); IPR018114 (PROSITE_PATTERNS); IPR001254 (PROSITE_PROFILES); IPR009003 (SUPERFAMILY)                                                                                                                                                                                                                                                                                                      |
| 683 | 236088_length_377_cvg_3.0_tip_1_2 | 12 | limbic system-associated membrane protein                                                                                                                                                     | 125 | 4.88E-42 | 69.30% | 0.119 | IPR003598 (SMART); IPR013783 (G3DSA:2.60.40.GENE3D); PF13895 (PFAM); IPR013783 (G3DSA:2.60.40.GENE3D); PTHR19831 (PANTHER); PTHR19831:SF47 (PANTHER); IPR007110 (PROSITE_PROFILES); SSF48726 (SUPERFAMILY); SSF48726 (SUPERFAMILY)                                                                                                                                                                                                                                            |
| 684 | 236220_length_378_cvg_3.0_tip_1_4 | 13 | wd sam and u-box domain-containing protein 1-like isoform x1                                                                                                                                  | 126 | 1.28E-27 | 61.80% | 0.133 | IPR001680 (SMART); IPR001680 (PFAM); IPR015943 (G3DSA:2.130.10.GENE3D); PTHR22847 (PANTHER); IPR019775 (PROSITE_PATTERNS); IPR017986 (PROSITE_PROFILES); IPR001680 (PROSITE_PROFILES); IPR017986 (SUPERFAMILY)                                                                                                                                                                                                                                                                |
| 686 | 236576_length_379_cvg_2.0_tip_1_5 | 5  | integrin alpha-ps1 isoform x2                                                                                                                                                                 | 126 | 1.43E-50 | 79.90% | 0.119 | IPR000413 (PRINTS); IPR013519 (SMART); G3DSA:2.130.10.130 (GENE3D); IPR013517 (PFAM); PTHR23220:SF77 (PANTHER); PTHR23220 (PANTHER); IPR013519 (PROSITE_PROFILES); IPR013519 (PROSITE_PROFILES); SSF69318 (SUPERFAMILY)                                                                                                                                                                                                                                                       |
| 685 | 236356_length_379_cvg_3.0_tip_1_3 | 12 | complement c1q tumor necrosis factor-related protein 4                                                                                                                                        | 127 | 1.46E-11 | 51.00% | 0.129 | IPR001073 (SMART); IPR001073 (PFAM); IPR008983 (G3DSA:2.60.120.GENE3D); PTHR22923 (PANTHER); IPR001073 (PROSITE_PROFILES); IPR008983 (SUPERFAMILY)                                                                                                                                                                                                                                                                                                                            |
| 687 | 236904_length_381_cvg_5.0_tip_1_3 | 19 | heat shock protein partial                                                                                                                                                                    | 127 | 9.54E-78 | 96.10% | 0.113 | G3DSA:3.30.420.40 (GENE3D); IPR013126 (PFAM); G3DSA:3.90.640.10 (GENE3D); G3DSA:3.30.420.40 (GENE3D); PTHR19375:SF142 (PANTHER); PTHR19375 (PANTHER); IPR018181 (PROSITE_PATTERNS); SSF53067 (SUPERFAMILY)                                                                                                                                                                                                                                                                    |



|     |                                    |     |                                                               |     |          |        |         |                                                                                                                                                                                                                                                                                                                                                                                                                                                                 |
|-----|------------------------------------|-----|---------------------------------------------------------------|-----|----------|--------|---------|-----------------------------------------------------------------------------------------------------------------------------------------------------------------------------------------------------------------------------------------------------------------------------------------------------------------------------------------------------------------------------------------------------------------------------------------------------------------|
| 688 | 237056_length_381_cvg_5.0_tip_1_3  | 26  | tyrosine-protein phosphatase 69d                              | 127 | 4.04E-49 | 80.40% | 0.138   | IPR003595 (SMART); IPR029021 (G3DSA:3.90.190.GENE3D); IPR000242 (PFAM); IPR029021 (G3DSA:3.90.190.GENE3D); PTHR19134:SF277 (PANTHER); PTHR19134 (PANTHER); IPR000387 (PROSITE_PROFILES); IPR000242 (PROSITE_PROFILES); IPR029021 (SUPERFAMILY)                                                                                                                                                                                                                  |
| 689 | 237070_length_381_cvg_2.0_tip_1_2  | 9   | thromboxane a synthase-like protein                           | 127 | 2.11E-39 | 69.30% | 0.171   | IPR002401 (PRINTS); IPR001128 (PFAM); IPR001128 (G3DSA:1.10.630.GENE3D); PTHR24292 (PANTHER); PTHR24292:SF24 (PANTHER); CYTOPLASMIC_DOMAIN (PHOBIUS); TRANSMEMBRANE (PHOBIUS); NON_CYTOPLASMIC_DOMAIN (PHOBIUS); IPR001128 (SUPERFAMILY); TMhelix (TMHMM)                                                                                                                                                                                                       |
| 690 | 237278_length_382_cvg_3.0_tip_1_2  | 13  | polypeptide n-acetylgalactosaminyltransferase 5 isoform x1    | 127 | 3.47E-40 | 75.30% | 0.101   | PTHR11675:SF21 (PANTHER); PTHR11675 (PANTHER)                                                                                                                                                                                                                                                                                                                                                                                                                   |
| 691 | 237386_length_383_cvg_8.6_tip_1_5  | 32  | dnaj protein homolog 1-like                                   | 127 | 2.39E-35 | 96.10% | 0.147   | IPR001623 (PRINTS); IPR001623 (SMART); IPR001623 (G3DSA:1.10.287.GENE3D); IPR001623 (PFAM); PTHR24077 (PANTHER); IPR018253 (PROSITE_PATTERNS); IPR001623 (PROSITE_PROFILES); IPR001623 (SUPERFAMILY)                                                                                                                                                                                                                                                            |
| 692 | 237414_length_383_cvg_3.0_tip_1_0  | 13  | retinoid-inducible serine carboxypeptidase                    | 128 | 4.84E-32 | 68.20% | 0.114   | IPR029058 (G3DSA:3.40.50.GENE3D); IPR001563 (PFAM); PTHR11802:SF30 (PANTHER); IPR001563 (PANTHER); IPR029058 (SUPERFAMILY)                                                                                                                                                                                                                                                                                                                                      |
| 693 | 237622_length_383_cvg_4.0_tip_1_3  | 18  | mam and ldl-receptor class a domain-containing protein 1-like | 128 | 1.27E-35 | 63.30% | 0.114   | IPR000998 (PFAM); PTHR23282 (PANTHER); IPR000998 (PROSITE_PROFILES); IPR013320 (SUPERFAMILY)                                                                                                                                                                                                                                                                                                                                                                    |
| 694 | 237654_length_384_cvg_4.0_tip_1_2  | 16  | epidermal growth factor receptor                              | 128 | 4.06E-73 | 94.00% | 0.117   | IPR020635 (SMART); G3DSA:1.10.510.10 (GENE3D); IPR001245 (PFAM); G3DSA:3.30.200.20 (GENE3D); PTHR24416:SF95 (PANTHER); PTHR24416 (PANTHER); IPR017441 (PROSITE_PATTERNS); NON_CYTOPLASMIC_DOMAIN (PHOBIUS); CYTOPLASMIC_DOMAIN (PHOBIUS); TRANSMEMBRANE (PHOBIUS); IPR000719 (PROSITE_PROFILES); IPR011009 (SUPERFAMILY)                                                                                                                                        |
| 695 | 237700_length_384_cvg_2.0_tip_1_4  | 9   | zinc finger protein 665-like                                  | 128 | 8.24E-48 | 72.90% | 0.1     | IPR015880 (SMART); PF13465 (PFAM); IPR013087 (G3DSA:3.30.160.GENE3D); IPR013087 (G3DSA:3.30.160.GENE3D); IPR013087 (G3DSA:3.30.160.GENE3D); PTHR24409 (PANTHER); IPR007087 (PROSITE_PATTERNS); IPR007087 (PROSITE_PATTERNS); IPR007087 (PROSITE_PATTERNS); IPR007087 (PROSITE_PATTERNS); IPR007087 (PROSITE_PROFILES); IPR007087 (PROSITE_PROFILES); IPR007087 (PROSITE_PROFILES); IPR007087 (PROSITE_PROFILES); SSF57667 (SUPERFAMILY); SSF57667 (SUPERFAMILY) |
| 696 | 237708_length_384_cvg_77.3_tip_1_0 | 768 | hypothetical protein BRAFLDRAFT_77846                         | 128 | 8.30E-22 | 62.90% | 0.426 Y | IPR013781 (G3DSA:3.20.20.GENE3D); PTHR31308 (PANTHER); NON_CYTOPLASMIC_DOMAIN (PHOBIUS); TRANSMEMBRANE (PHOBIUS); CYTOPLASMIC_DOMAIN (PHOBIUS); SignalP-TM (SIGNALP_GRAM_POSITIVE); IPR017853 (SUPERFAMILY); TMhelix (TMHMM)                                                                                                                                                                                                                                    |
| 697 | 238136_length_386_cvg_5.6_tip_1_5  | 24  | protein disulfide-isomerase a6                                | 128 | 6.37E-57 | 80.90% | 0.117   | IPR012336 (G3DSA:3.40.30.GENE3D); IPR013766 (PFAM); PTHR18929:SF38 (PANTHER); PTHR18929 (PANTHER); IPR012336 (SUPERFAMILY)                                                                                                                                                                                                                                                                                                                                      |
| 698 | 238286_length_386_cvg_3.1_tip_1_2  | 11  | collagen alpha-1 chain                                        | 128 | 2.09E-18 | 61.80% | 0.1     | IPR008160 (PFAM); PTHR24023 (PANTHER); PTHR24023:SF379 (PANTHER)                                                                                                                                                                                                                                                                                                                                                                                                |
| 699 | 238286_length_386_cvg_3.1_tip_1_4  | 11  | collagen-like protein                                         | 129 | 3.74E-12 | 47.80% | 0.165   | no IPS match                                                                                                                                                                                                                                                                                                                                                                                                                                                    |
| 700 | 238448_length_387_cvg_2.0_tip_1_2  | 6   | low-density lipoprotein receptor-related protein 2            | 129 | 6.98E-38 | 71.80% | 0.103   | IPR001881 (SMART); G3DSA:2.10.25.10 (GENE3D); IPR011042 (G3DSA:2.120.10.GENE3D); IPR001881 (PFAM); PTHR10529 (PANTHER); IPR018097 (PROSITE_PATTERNS); SSF57196 (SUPERFAMILY)                                                                                                                                                                                                                                                                                    |
| 703 | 239032_length_389_cvg_10.8_tip_1_2 | 35  | hemagglutinin proteinase                                      | 129 | 1.99E-15 | 50.30% | 0.108   | IPR013856 (G3DSA:3.10.170.GENE3D); IPR013856 (PFAM)                                                                                                                                                                                                                                                                                                                                                                                                             |
| 704 | 239156_length_389_cvg_4.0_tip_1_5  | 19  | senseless- isoform a                                          | 129 | 1.16E-19 | 53.10% | 0.101   | IPR015880 (SMART); PF13912 (PFAM); IPR013087 (G3DSA:3.30.160.GENE3D); IPR013087 (G3DSA:3.30.160.GENE3D); PF13465 (PFAM); PTHR24409 (PANTHER); IPR007087 (PROSITE_PATTERNS); IPR007087 (PROSITE_PATTERNS); IPR007087 (PROSITE_PATTERNS); IPR007087 (PROSITE_PATTERNS); IPR007087 (PROSITE_PROFILES); IPR007087 (PROSITE_PROFILES); IPR007087 (PROSITE_PROFILES); SSF57667 (SUPERFAMILY); SSF57667 (SUPERFAMILY)                                                  |
| 701 | 238796_length_388_cvg_2.2_tip_1_0  | 11  | vascular non-inflammatory molecule 3-like                     | 130 | 3.68E-13 | 54.00% | 0.105   | IPR003010 (G3DSA:3.60.110.GENE3D); IPR003010 (PFAM); IPR012101 (PANTHER); IPR003010 (PROSITE_PROFILES); IPR003010 (SUPERFAMILY)                                                                                                                                                                                                                                                                                                                                 |
| 702 | 239030_length_389_cvg_2.0_tip_1_0  | 9   | trypsin- partial                                              | 130 | 5.65E-40 | 65.50% | 0.158   | IPR001254 (SMART); G3DSA:2.40.10.10 (GENE3D); IPR001254 (PFAM); G3DSA:2.40.10.10 (GENE3D); PTHR24258 (PANTHER); PTHR24258:SF4 (PANTHER); IPR001254 (PROSITE_PROFILES); IPR009003 (SUPERFAMILY)                                                                                                                                                                                                                                                                  |
| 705 | 239264_length_390_cvg_5.5_tip_1_2  | 21  | lipase 3-like                                                 | 130 | 5.95E-35 | 69.10% | 0.094   | IPR029058 (G3DSA:3.40.50.GENE3D); PTHR11005:SF6 (PANTHER); PTHR11005 (PANTHER); IPR029058 (SUPERFAMILY)                                                                                                                                                                                                                                                                                                                                                         |
| 706 | 239272_length_390_cvg_2.0_tip_1_1  | 10  | very low-density lipoprotein partial                          | 130 | 6.12E-12 | 48.70% | 0.108   | IPR002172 (PRINTS); IPR002172 (SMART); IPR002172 (G3DSA:4.10.400.GENE3D); IPR002172 (G3DSA:4.10.400.GENE3D); IPR002172 (G3DSA:4.10.400.GENE3D); PTHR10529 (PANTHER); IPR002172 (PROSITE_PROFILES); IPR002172 (PROSITE_PROFILES); IPR002172 (SUPERFAMILY); IPR002172 (SUPERFAMILY)                                                                                                                                                                               |



|     |                                    |    |                                                                                                                                                                                |     |          |        |         |                                                                                                                                                                                                                                                                                                                                                                                             |
|-----|------------------------------------|----|--------------------------------------------------------------------------------------------------------------------------------------------------------------------------------|-----|----------|--------|---------|---------------------------------------------------------------------------------------------------------------------------------------------------------------------------------------------------------------------------------------------------------------------------------------------------------------------------------------------------------------------------------------------|
| 707 | 239390_length_390_cvg_2.0_tip_1_2  | 7  | tyrosine-protein phosphatase 69d-like                                                                                                                                          | 130 | 1.73E-46 | 76.50% | 0.218   | IPR029021 (G3DSA:3.90.190.GENE3D); IPR000242 (PFAM); PTHR19134 (PANTHER); PTHR19134:SF261 (PANTHER); IPR000387 (PROSITE_PROFILES); IPR000242 (PROSITE_PROFILES); IPR029021 (SUPERFAMILY)                                                                                                                                                                                                    |
| 708 | 239480_length_390_cvg_2.8_tip_1_3  | 11 | granzyme c                                                                                                                                                                     | 130 | 1.24E-23 | 61.20% | 0.104   | IPR001254 (SMART); IPR001254 (PFAM); G3DSA:2.40.10.10 (GENE3D); PTHR24268 (PANTHER); IPR018114 (PROSITE_PATTERNS); IPR001254 (PROSITE_PROFILES); IPR009003 (SUPERFAMILY)                                                                                                                                                                                                                    |
| 711 | 239736_length_391_cvg_3.0_tip_1_5  | 11 | apolipoprotein d-like                                                                                                                                                          | 130 | 1.64E-08 | 61.60% | 0.141   | IPR012674 (G3DSA:2.40.128.GENE3D); PTHR10612 (PANTHER); NON_CYTOPLASMIC_DOMAIN (PHOBIUS); CYTOPLASMIC_DOMAIN (PHOBIUS); TRANSMEMBRANE (PHOBIUS); IPR011038 (SUPERFAMILY); TMhelix (TMHMM)                                                                                                                                                                                                   |
| 713 | 239962_length_392_cvg_2.0_tip_1_2  | 7  | uncharacterized protein ZBAI_02902                                                                                                                                             | 130 | 3.61E-11 | 61.90% | 0.097   | IPR015880 (SMART); IPR013087 (G3DSA:3.30.160.GENE3D); IPR013087 (G3DSA:3.30.160.GENE3D); PF13465 (PFAM); PTHR24409 (PANTHER); PTHR24409:SF14 (PANTHER); IPR007087 (PROSITE_PATTERNS); IPR007087 (PROSITE_PROFILES); IPR007087 (PROSITE_PROFILES); SSF57667 (SUPERFAMILY)                                                                                                                    |
| 709 | 239524_length_391_cvg_2.2_tip_1_0  | 13 | prolyl 3-hydroxylase 2                                                                                                                                                         | 131 | 1.21E-23 | 75.00% | 0.107   | Coil (COILS); PTHR14049:SF9 (PANTHER); PTHR14049 (PANTHER)                                                                                                                                                                                                                                                                                                                                  |
| 710 | 239566_length_391_cvg_4.0_tip_1_0  | 17 | maguk p55 subfamily member 5                                                                                                                                                   | 131 | 4.98E-72 | 92.00% | 0.107   | Coil (COILS); Coil (COILS); IPR008145 (SMART); IPR027417 (G3DSA:3.40.50.GENE3D); IPR008145 (PFAM); PTHR23122 (PANTHER); PTHR23122:SF32 (PANTHER); IPR008144 (PROSITE_PROFILES); IPR027417 (SUPERFAMILY)                                                                                                                                                                                     |
| 712 | 239872_length_392_cvg_2.0_tip_1_4  | 10 | lipoprotein receptor                                                                                                                                                           | 131 | 3.35E-23 | 68.30% | 0.325   | IPR000832 (PFAM); PTHR12011:SF260 (PANTHER); PTHR12011 (PANTHER); TRANSMEMBRANE (PHOBIUS); TRANSMEMBRANE (PHOBIUS); CYTOPLASMIC_DOMAIN (PHOBIUS); CYTOPLASMIC_DOMAIN (PHOBIUS); NON_CYTOPLASMIC_DOMAIN (PHOBIUS); TMhelix (TMHMM); TMhelix (TMHMM)                                                                                                                                          |
| 714 | 240232_length_393_cvg_10.0_tip_1_0 | 44 | upf0669 protein c6orf120 homolog                                                                                                                                               | 131 | 3.73E-38 | 66.40% | 0.106   | PTHR31703 (PANTHER)                                                                                                                                                                                                                                                                                                                                                                         |
| 715 | 240286_length_393_cvg_2.0_tip_1_5  | 11 | heat shock 70 kda protein 14                                                                                                                                                   | 131 | 6.68E-50 | 73.40% | 0.225   | G3DSA:3.30.420.40 (GENE3D); IPR013126 (PFAM); G3DSA:3.90.640.10 (GENE3D); PTHR19375:SF158 (PANTHER); PTHR19375 (PANTHER); SSF53067 (SUPERFAMILY); TMhelix (TMHMM)                                                                                                                                                                                                                           |
| 716 | 240302_length_394_cvg_3.0_tip_1_5  | 14 | achain nmr solution dynamics and binding properties of the krigle iv type 8 module of apolipoprotein                                                                           | 131 | 7.52E-31 | 64.30% | 0.709 Y | PR00018 (PRINTS); IPR000001 (SMART); G3DSA:2.40.20.10 (GENE3D); IPR000001 (PFAM); PTHR24259 (PANTHER); IPR018056 (PROSITE_PATTERNS); SIGNAL_PEPTIDE_C_REGION (PHOBIUS); SIGNAL_PEPTIDE_N_REGION (PHOBIUS); SIGNAL_PEPTIDE_H_REGION (PHOBIUS); SIGNAL_PEPTIDE (PHOBIUS); NON_CYTOPLASMIC_DOMAIN (PHOBIUS); IPR000001 (PROSITE_PROFILES); SignalP-noTM (SIGNALP_EUK); IPR013806 (SUPERFAMILY) |
| 717 | 240326_length_394_cvg_2.0_tip_1_1  | 8  | transforming growth factor-beta-induced protein ig-h3-like isoform x6                                                                                                          | 131 | 6.59E-43 | 68.10% | 0.193   | IPR000782 (SMART); IPR000782 (PFAM); IPR000782 (G3DSA:2.30.180.GENE3D); PTHR10900 (PANTHER); IPR000782 (PROSITE_PROFILES); IPR000782 (SUPERFAMILY)                                                                                                                                                                                                                                          |
| 719 | 240442_length_394_cvg_2.3_tip_1_1  | 8  | polypeptide n-acetylgalactosaminyltransferase partial                                                                                                                          | 131 | 5.58E-68 | 83.90% | 0.104   | G3DSA:2.80.10.50 (GENE3D); IPR000772 (PFAM); PTHR11675 (PANTHER); PTHR11675:SF24 (PANTHER); IPR000772 (PROSITE_PROFILES); IPR000772 (SUPERFAMILY); IPR029044 (SUPERFAMILY)                                                                                                                                                                                                                  |
| 722 | 240666_length_395_cvg_2.0_tip_1_5  | 10 | calcium-activated chloride channel regulator 2                                                                                                                                 | 131 | 1.07E-17 | 52.20% | 0.101   | IPR013783 (G3DSA:2.60.40.GENE3D); PTHR10579 (PANTHER); PTHR10579:SF43 (PANTHER)                                                                                                                                                                                                                                                                                                             |
| 718 | 240360_length_394_cvg_2.0_tip_1_0  | 8  | attractin-like protein 1 isoform x1                                                                                                                                            | 132 | 1.28E-41 | 73.70% | 0.149   | G3DSA:2.10.25.10 (GENE3D); G3DSA:2.10.25.10 (GENE3D); IPR013111 (PFAM); IPR000859 (G3DSA:2.60.120.GENE3D); PTHR10574 (PANTHER); PTHR10574:SF3 (PANTHER); IPR013032 (PROSITE_PATTERNS); IPR013032 (PROSITE_PATTERNS); IPR000742 (PROSITE_PROFILES)                                                                                                                                           |
| 720 | 240582_length_395_cvg_11.9_tip_1_3 | 31 | low quality protein: mucin-2-like                                                                                                                                              | 132 | 5.77E-07 | 44.29% | 0.119   | PR01217 (PRINTS); IPR001846 (PFAM); IPR001846 (PROSITE_PROFILES)                                                                                                                                                                                                                                                                                                                            |
| 721 | 240612_length_395_cvg_3.0_tip_1_1  | 12 | mlrp1_acrmi ame: full=mam and ldl-receptor class a domain-containing protein 1 ame: full=skeletal organic matrix mam and ldl-receptor 1 short=som mam and ldl-receptor partial | 132 | 1.74E-16 | 64.40% | 0.322   | IPR000998 (PFAM); PTHR23282 (PANTHER); PTHR23282:SF75 (PANTHER); CYTOPLASMIC_DOMAIN (PHOBIUS); TRANSMEMBRANE (PHOBIUS); NON_CYTOPLASMIC_DOMAIN (PHOBIUS); IPR000998 (PROSITE_PROFILES); IPR000998 (PROSITE_PROFILES); IPR013320 (SUPERFAMILY); TMhelix (TMHMM)                                                                                                                              |
| 723 | 240740_length_395_cvg_7.3_tip_1_3  | 35 | ectonucleoside triphosphate diphosphohydrolase 5 isoform x2                                                                                                                    | 132 | 5.93E-22 | 69.50% | 0.14    | IPR000407 (PFAM); IPR000407 (PANTHER); PTHR11782:SF30 (PANTHER); CYTOPLASMIC_DOMAIN (PHOBIUS); TRANSMEMBRANE (PHOBIUS); NON_CYTOPLASMIC_DOMAIN (PHOBIUS); TMhelix (TMHMM)                                                                                                                                                                                                                   |
| 724 | 240796_length_396_cvg_2.0_tip_1_5  | 7  | neural cell adhesion molecule 1 isoform 2                                                                                                                                      | 132 | 1.67E-12 | 49.20% | 0.143   | IPR013783 (G3DSA:2.60.40.GENE3D); PF13895 (PFAM); IPR013098 (PFAM); IPR013783 (G3DSA:2.60.40.GENE3D); PTHR10489 (PANTHER); IPR007110 (PROSITE_PROFILES); IPR007110 (PROSITE_PROFILES); SSF48726 (SUPERFAMILY); SSF48726 (SUPERFAMILY)                                                                                                                                                       |
| 725 | 240826_length_396_cvg_27.0_tip_1_5 | 98 | twitchin isoform x5                                                                                                                                                            | 132 | 9.73E-44 | 76.00% | 0.098   | IPR013783 (G3DSA:2.60.40.GENE3D); IPR013783 (G3DSA:2.60.40.GENE3D); IPR013098 (PFAM); PTHR19897:SF155 (PANTHER); PTHR19897 (PANTHER); IPR007110 (PROSITE_PROFILES); SSF48726 (SUPERFAMILY); SSF48726 (SUPERFAMILY)                                                                                                                                                                          |

|     |                                     |      |                                                          |     |          |        |       |                                                                                                                                                                                                                                                                                                                                                                                                                                                                                         |
|-----|-------------------------------------|------|----------------------------------------------------------|-----|----------|--------|-------|-----------------------------------------------------------------------------------------------------------------------------------------------------------------------------------------------------------------------------------------------------------------------------------------------------------------------------------------------------------------------------------------------------------------------------------------------------------------------------------------|
| 726 | 240874_length_396_cvg_3.0_tip_1_1   | 15   | cytokine receptor                                        | 132 | 4.13E-23 | 59.50% | 0.142 | IPR013783 (G3DSA:2.60.40.GENE3D); IPR003961 (PFAM); PTHR10489 (PANTHER); IPR003961 (PROSITE_PROFILES); IPR003961 (PROSITE_PROFILES); IPR003961 (SUPERFAMILY)                                                                                                                                                                                                                                                                                                                            |
| 728 | 241066_length_397_cvg_2.0_tip_1_2   | 10   | wnt-receptor frizzled-like protein variant 2             | 132 | 4.31E-75 | 88.60% | 0.111 | IPR020067 (SMART); IPR020067 (G3DSA:1.10.2000.GENE3D); IPR020067 (PFAM); IPR026561 (PTHR11309:PANTHER); IPR015526 (PANTHER); IPR020067 (PROSITE_PROFILES); IPR020067 (SUPERFAMILY)                                                                                                                                                                                                                                                                                                      |
| 730 | 241142_length_397_cvg_111.6_tip_1_2 | 6720 | dermatopontin 2                                          | 132 | 1.93E-16 | 60.80% | 0.297 | PF14704 (PFAM); IPR026645 (PANTHER); CYTOPLASMIC_DOMAIN (PHOBIUS); TRANSMEMBRANE (PHOBIUS); NON_CYTOPLASMIC_DOMAIN (PHOBIUS); TMhelix (TMHMM)                                                                                                                                                                                                                                                                                                                                           |
| 731 | 241170_length_397_cvg_3.0_tip_1_5   | 12   | meprin a                                                 | 132 | 1.43E-24 | 53.30% | 0.104 | G3DSA:2.170.300.10 (GENE3D); IPR024079 (G3DSA:3.40.390.GENE3D); IPR001506 (PFAM); IPR000859 (G3DSA:2.60.120.GENE3D); PTHR10127 (PANTHER); PTHR10127:SF580 (PANTHER); IPR000859 (PROSITE_PROFILES)                                                                                                                                                                                                                                                                                       |
| 732 | 241208_length_397_cvg_2.5_tip_1_1   | 15   | sco-spondin isoform x1                                   | 132 | 4.03E-17 | 52.80% | 0.101 | IPR002172 (PRINTS); IPR002172 (SMART); IPR002172 (G3DSA:4.10.400.GENE3D); IPR002172 (G3DSA:4.10.400.GENE3D); IPR002172 (PFAM); G3DSA:4.10.1220.10 (GENE3D); PTHR10529 (PANTHER); PTHR10529:SF208 (PANTHER); IPR002172 (PROSITE_PROFILES); IPR002172 (PROSITE_PROFILES); IPR002172 (SUPERFAMILY); IPR002172 (SUPERFAMILY)                                                                                                                                                                |
| 733 | 241226_length_397_cvg_2.0_tip_1_1   | 12   | ectonucleoside triphosphate diphosphohydrolase 7         | 132 | 8.38E-23 | 72.60% | 0.314 | IPR000407 (PFAM); IPR000407 (PANTHER); PTHR11782:SF37 (PANTHER); SIGNAL_PEPTIDE_N_REGION (PHOBIUS); SIGNAL_PEPTIDE (PHOBIUS); SIGNAL_PEPTIDE_H_REGION (PHOBIUS); SIGNAL_PEPTIDE_C_REGION (PHOBIUS); NON_CYTOPLASMIC_DOMAIN (PHOBIUS); TMhelix (TMHMM)                                                                                                                                                                                                                                   |
| 727 | 241028_length_397_cvg_2.0_tip_1_0   | 6    | down syndrome cell adhesion molecule-like protein dscam2 | 133 | 2.01E-62 | 88.00% | 0.106 | IPR003598 (SMART); IPR003599 (SMART); IPR013783 (G3DSA:2.60.40.GENE3D); IPR013098 (PFAM); PTHR10489:SF567 (PANTHER); PTHR10489 (PANTHER); IPR007110 (PROSITE_PROFILES); SSF48726 (SUPERFAMILY)                                                                                                                                                                                                                                                                                          |
| 729 | 241076_length_397_cvg_9.1_tip_1_0   | 50   | kallikrein-14- partial                                   | 133 | 2.26E-26 | 68.70% | 0.102 | IPR001254 (SMART); G3DSA:2.40.10.10 (GENE3D); IPR001254 (PFAM); PTHR24256 (PANTHER); IPR018114 (PROSITE_PATTERNS); CYTOPLASMIC_DOMAIN (PHOBIUS); TRANSMEMBRANE (PHOBIUS); NON_CYTOPLASMIC_DOMAIN (PHOBIUS); IPR001254 (PROSITE_PROFILES); IPR009003 (SUPERFAMILY); TMhelix (TMHMM)                                                                                                                                                                                                      |
| 734 | 241466_length_398_cvg_3.0_tip_1_1   | 12   | 15-hydroxyprostaglandin dehydrogenase                    | 133 | 4.00E-64 | 78.10% | 0.112 | IPR002198 (PRINTS); IPR002424 (PRINTS); IPR016040 (G3DSA:3.40.50.GENE3D); IPR002198 (PFAM); PTHR24310 (PANTHER); SSF51735 (SUPERFAMILY)                                                                                                                                                                                                                                                                                                                                                 |
| 735 | 241486_length_398_cvg_3.3_tip_1_4   | 15   | peptidyl-prolyl cis-trans isomerase cwc27 homolog        | 133 | 2.84E-76 | 90.00% | 0.16  | IPR002130 (PRINTS); IPR002130 (PFAM); IPR029000 (G3DSA:2.40.100.GENE3D); IPR024936 (PIRSF); IPR024936 (PANTHER); PTHR11071:SF152 (PANTHER); IPR020892 (PROSITE_PATTERNS); IPR002130 (PROSITE_PROFILES); IPR029000 (SUPERFAMILY)                                                                                                                                                                                                                                                         |
| 736 | 241638_length_399_cvg_3.5_tip_1_2   | 13   | ubiquitin thioesterase partial                           | 133 | 7.40E-19 | 55.10% | 0.288 | no IPS match                                                                                                                                                                                                                                                                                                                                                                                                                                                                            |
| 737 | 241706_length_399_cvg_5.8_tip_1_0   | 27   | glucose dehydrogenase                                    | 133 | 2.09E-17 | 92.20% | 0.122 | G3DSA:3.50.50.60 (GENE3D); IPR007867 (PFAM); PTHR11552 (PANTHER); PTHR11552:SF90 (PANTHER); SSF51905 (SUPERFAMILY)                                                                                                                                                                                                                                                                                                                                                                      |
| 739 | 241854_length_400_cvg_4.0_tip_1_4   | 17   | latrophilin cir1-like isoform x1                         | 133 | 3.19E-12 | 54.00% | 0.126 | IPR000203 (PFAM); PTHR12011 (PANTHER); IPR000203 (PROSITE_PROFILES)                                                                                                                                                                                                                                                                                                                                                                                                                     |
| 738 | 241836_length_400_cvg_2.0_tip_1_3   | 7    | neurotrypsin isoform x1                                  | 134 | 2.99E-45 | 70.50% | 0.109 | IPR001190 (PRINTS); IPR017448 (SMART); IPR001190 (PFAM); IPR017448 (G3DSA:3.10.250.GENE3D); IPR002172 (G3DSA:4.10.400.GENE3D); PTHR19331 (PANTHER); IPR001190 (PROSITE_PROFILES); IPR017448 (SUPERFAMILY)                                                                                                                                                                                                                                                                               |
| 740 | 242326_length_402_cvg_3.0_tip_1_3   | 13   | gastrula zinc finger protein - partial                   | 134 | 3.39E-39 | 66.90% | 0.106 | IPR015880 (SMART); IPR013087 (G3DSA:3.30.160.GENE3D); IPR013087 (G3DSA:3.30.160.GENE3D); IPR013087 (G3DSA:3.30.160.GENE3D); PF13465 (PFAM); PTHR24409 (PANTHER); IPR007087 (PROSITE_PATTERNS); IPR007087 (PROSITE_PATTERNS); IPR007087 (PROSITE_PATTERNS); IPR007087 (PROSITE_PROFILES); IPR007087 (PROSITE_PROFILES); IPR007087 (PROSITE_PROFILES); IPR007087 (PROSITE_PROFILES); SSF57667 (SUPERFAMILY); SSF57667 (SUPERFAMILY)                                                       |
| 741 | 242444_length_402_cvg_2.0_tip_1_5   | 9    | gastrula zinc finger                                     | 134 | 4.15E-40 | 64.10% | 0.13  | IPR015880 (SMART); IPR013087 (G3DSA:3.30.160.GENE3D); IPR013087 (G3DSA:3.30.160.GENE3D); PF13465 (PFAM); IPR013087 (G3DSA:3.30.160.GENE3D); PTHR24409 (PANTHER); IPR007087 (PROSITE_PATTERNS); IPR007087 (PROSITE_PATTERNS); IPR007087 (PROSITE_PATTERNS); IPR007087 (PROSITE_PATTERNS); IPR007087 (PROSITE_PROFILES); IPR007087 (PROSITE_PROFILES); IPR007087 (PROSITE_PROFILES); IPR007087 (PROSITE_PROFILES); SSF57667 (SUPERFAMILY); SSF57667 (SUPERFAMILY); SSF57667 (SUPERFAMILY) |

|     |                                    |     |                                            |     |          |        |         |                                                                                                                                                                                                                                                                                                                      |
|-----|------------------------------------|-----|--------------------------------------------|-----|----------|--------|---------|----------------------------------------------------------------------------------------------------------------------------------------------------------------------------------------------------------------------------------------------------------------------------------------------------------------------|
| 742 | 242546_length_403_cvg_2.0_tip_1_5  | 12  | eph receptor tyrosine                      | 134 | 1.84E-84 | 92.30% | 0.273   | IPR001245 (PRINTS); IPR020635 (SMART); IPR013761 (G3DSA:1.10.150.GENE3D); G3DSA:1.10.510.10 (GENE3D); IPR001245 (PFAM); PTHR24416 (PANTHER); PTHR24416:SF263 (PANTHER); IPR001660 (PROSITE_PROFILES); IPR000719 (PROSITE_PROFILES); IPR011009 (SUPERFAMILY)                                                          |
| 744 | 242696_length_403_cvg_3.0_tip_1_4  | 15  | translocation protein sec63 homolog        | 134 | 6.44E-58 | 77.90% | 0.125   | IPR001623 (PRINTS); IPR001623 (SMART); IPR001623 (G3DSA:1.10.287.GENE3D); IPR001623 (PFAM); IPR027137 (PANTHER); PTHR24075:SF0 (PANTHER); CYTOPLASMIC_DOMAIN (PHOBIUS); TRANSMEMBRANE (PHOBIUS); NON_CYTOPLASMIC_DOMAIN (PHOBIUS); IPR001623 (PROSITE_PROFILES); IPR001623 (SUPERFAMILY); TMhelix (TMHMM)            |
| 745 | 242768_length_404_cvg_4.0_tip_1_2  | 18  | calbindin isoform a                        | 134 | 7.69E-85 | 93.50% | 0.104   | IPR002048 (SMART); IPR011992 (G3DSA:1.10.238.GENE3D); IPR011992 (G3DSA:1.10.238.GENE3D); IPR011992 (PFAM); PTHR19972 (PANTHER); IPR018247 (PROSITE_PATTERNS); IPR018247 (PROSITE_PATTERNS); IPR002048 (PROSITE_PROFILES); IPR002048 (PROSITE_PROFILES); SSF47473 (SUPERFAMILY)                                       |
| 743 | 242676_length_403_cvg_3.0_tip_1_0  | 13  | retinol dehydrogenase 13                   | 135 | 1.51E-38 | 74.40% | 0.166   | IPR002347 (PRINTS); IPR002198 (PFAM); IPR016040 (G3DSA:3.40.50.GENE3D); PTHR24316:SF305 (PANTHER); PTHR24316 (PANTHER); TRANSMEMBRANE (PHOBIUS); CYTOPLASMIC_DOMAIN (PHOBIUS); NON_CYTOPLASMIC_DOMAIN (PHOBIUS); SSF51735 (SUPERFAMILY); TMhelix (TMHMM)                                                             |
| 746 | 242790_length_404_cvg_4.0_tip_1_3  | 21  | peptidyl-prolyl cis-trans isomerase h-like | 135 | 2.42E-56 | 96.00% | 0.1     | IPR002130 (PRINTS); IPR029000 (G3DSA:2.40.100.GENE3D); IPR002130 (PFAM); PTHR11071:SF58 (PANTHER); IPR024936 (PANTHER); IPR002130 (PROSITE_PROFILES); IPR029000 (SUPERFAMILY)                                                                                                                                        |
| 747 | 242856_length_404_cvg_2.0_tip_1_0  | 10  | gastrula zinc finger protein               | 135 | 2.77E-17 | 51.80% | 0.102   | IPR015880 (SMART); IPR013087 (G3DSA:3.30.160.GENE3D); PF13465 (PFAM); IPR013087 (G3DSA:3.30.160.GENE3D); PF13894 (PFAM); PTHR24409 (PANTHER); IPR007087 (PROSITE_PATTERNS); IPR007087 (PROSITE_PATTERNS); IPR007087 (PROSITE_PROFILES); IPR007087 (PROSITE_PROFILES); SSF57667 (SUPERFAMILY); SSF57667 (SUPERFAMILY) |
| 748 | 242940_length_405_cvg_76.9_tip_1_2 | 614 | epidermal retinol dehydrogenase partial    | 135 | 9.51E-22 | 71.10% | 0.117   | IPR016040 (G3DSA:3.40.50.GENE3D); PTHR24316:SF246 (PANTHER); PTHR24316 (PANTHER); NON_CYTOPLASMIC_DOMAIN (PHOBIUS); TRANSMEMBRANE (PHOBIUS); CYTOPLASMIC_DOMAIN (PHOBIUS); SSF51735 (SUPERFAMILY); TMhelix (TMHMM); TMhelix (TMHMM)                                                                                  |
| 749 | 242952_length_405_cvg_28.0_tip_1_3 | 120 | poly -specific endoribonuclease homolog    | 135 | 4.19E-20 | 62.50% | 0.325   | IPR018998 (PFAM); TRANSMEMBRANE (PHOBIUS); CYTOPLASMIC_DOMAIN (PHOBIUS); NON_CYTOPLASMIC_DOMAIN (PHOBIUS); SSF142877 (SUPERFAMILY); TMhelix (TMHMM)                                                                                                                                                                  |
| 750 | 243024_length_405_cvg_4.0_tip_1_3  | 20  | dnaj homolog dnj-5                         | 135 | 7.72E-67 | 85.30% | 0.11    | IPR001623 (PRINTS); IPR001623 (SMART); IPR001623 (PFAM); IPR001623 (G3DSA:1.10.287.GENE3D); PTHR24078 (PANTHER); PTHR24078:SF141 (PANTHER); IPR001623 (PROSITE_PROFILES); IPR001623 (SUPERFAMILY)                                                                                                                    |
| 753 | 243376_length_406_cvg_5.0_tip_1_2  | 24  | chemosensory protein                       | 135 | 4.77E-49 | 77.70% | 0.499 Y | IPR005055 (PFAM); IPR005055 (G3DSA:1.10.2080.GENE3D); PTHR11257:SF2 (PANTHER); IPR005055 (PANTHER); SIGNAL_PEPTIDE_C_REGION (PHOBIUS); NON_CYTOPLASMIC_DOMAIN (PHOBIUS); SIGNAL_PEPTIDE (PHOBIUS); SIGNAL_PEPTIDE_N_REGION (PHOBIUS); SIGNAL_PEPTIDE_H_REGION (PHOBIUS); IPR005055 (SUPERFAMILY)                     |
| 754 | 243422_length_407_cvg_5.0_tip_1_2  | 24  | carboxypeptidase n catalytic chain         | 135 | 4.46E-23 | 57.60% | 0.269   | G3DSA:3.40.630.10 (GENE3D); IPR014766 (G3DSA:2.60.40.GENE3D); PF13620 (PFAM); PTHR11532 (PANTHER); PTHR11532:SF50 (PANTHER); SSF53187 (SUPERFAMILY); IPR008969 (SUPERFAMILY)                                                                                                                                         |
| 751 | 243206_length_406_cvg_2.0_tip_1_0  | 7   | ---NA---                                   | 136 |          |        | 0.127   | IPR008979 (G3DSA:2.60.120.GENE3D); IPR000421 (PFAM); IPR000421 (PROSITE_PATTERNS); IPR000421 (PROSITE_PROFILES); IPR008979 (SUPERFAMILY)                                                                                                                                                                             |
| 752 | 243346_length_406_cvg_3.0_tip_1_0  | 14  | tyrosine-protein kinase hopscotch          | 136 | 5.86E-42 | 70.50% | 0.117   | IPR001245 (PRINTS); IPR020635 (SMART); IPR001245 (PFAM); G3DSA:1.10.510.10 (GENE3D); PTHR24418:SF216 (PANTHER); PTHR24418 (PANTHER); IPR000719 (PROSITE_PROFILES); IPR011009 (SUPERFAMILY)                                                                                                                           |
| 755 | 243480_length_407_cvg_2.0_tip_1_1  | 8   | isoform a                                  | 136 | 1.01E-45 | 67.30% | 0.101   | IPR005331 (PFAM); IPR027417 (G3DSA:3.40.50.GENE3D); IPR018011 (PANTHER); PTHR12137:SF30 (PANTHER)                                                                                                                                                                                                                    |
| 756 | 243512_length_407_cvg_7.0_tip_1_1  | 28  | cuticular protein                          | 136 | 2.78E-30 | 75.40% | 0.104   | TMhelix (TMHMM)                                                                                                                                                                                                                                                                                                      |
| 757 | 243630_length_408_cvg_2.0_tip_1_1  | 11  | laminin subunit gamma-1                    | 136 | 2.36E-53 | 76.40% | 0.109   | IPR018031 (SMART); IPR000034 (PFAM); PTHR10574 (PANTHER); PTHR10574:SF231 (PANTHER); IPR000034 (PROSITE_PROFILES)                                                                                                                                                                                                    |
| 758 | 243634_length_408_cvg_2.2_tip_1_3  | 11  | multicopper oxidase                        | 136 | 9.66E-41 | 67.20% | 0.103   | IPR008972 (G3DSA:2.60.40.GENE3D); IPR008972 (G3DSA:2.60.40.GENE3D); IPR011707 (PFAM); PTHR11709:SF33 (PANTHER); PTHR11709 (PANTHER); IPR008972 (SUPERFAMILY)                                                                                                                                                         |

|     |                                    |     |                                                         |     |          |        |       |                                                                                                                                                                                                                                                                                                                                                                                                                                                           |
|-----|------------------------------------|-----|---------------------------------------------------------|-----|----------|--------|-------|-----------------------------------------------------------------------------------------------------------------------------------------------------------------------------------------------------------------------------------------------------------------------------------------------------------------------------------------------------------------------------------------------------------------------------------------------------------|
| 759 | 243692_length_408_cvg_3.8_tip_1_4  | 16  | down syndrome cell adhesion molecule-like partial       | 136 | 4.44E-55 | 79.10% | 0.105 | IPR003598 (SMART); IPR003599 (SMART); IPR013783 (G3DSA:2.60.40.GENE3D); IPR003961 (PFAM); IPR013098 (PFAM); IPR013783 (G3DSA:2.60.40.GENE3D); PTHR10489 (PANTHER); PTHR10489:SF567 (PANTHER); IPR007110 (PROSITE_PROFILES); IPR003961 (PROSITE_PROFILES); IPR003961 (SUPERFAMILY); SSF48726 (SUPERFAMILY)                                                                                                                                                 |
| 760 | 243802_length_408_cvg_3.0_tip_1_5  | 17  | receptor-type tyrosine-protein phosphatase kappa-like   | 136 | 2.29E-35 | 65.90% | 0.108 | IPR000242 (PRINTS); IPR000242 (SMART); IPR000242 (PFAM); IPR029021 (G3DSA:3.90.190.GENE3D); PTHR19134 (PANTHER); IPR000242 (PROSITE_PROFILES); IPR029021 (SUPERFAMILY)                                                                                                                                                                                                                                                                                    |
| 761 | 244404_length_411_cvg_4.3_tip_1_0  | 22  | matrix metalloproteinase-14 isoform x1                  | 137 | 2.70E-18 | 57.00% | 0.105 | IPR018487 (SMART); IPR000585 (G3DSA:2.110.10.GENE3D); IPR018487 (PFAM); PTHR10201:SF131 (PANTHER); PTHR10201 (PANTHER); IPR018487 (PROSITE_PROFILES); IPR000585 (SUPERFAMILY)                                                                                                                                                                                                                                                                             |
| 762 | 244486_length_412_cvg_3.5_tip_1_2  | 16  | protein phosphatase 1 regulatory subunit 16a isoform x3 | 137 | 2.62E-70 | 89.00% | 0.12  | IPR002110 (SMART); PF13857 (PFAM); IPR002110 (PFAM); IPR020683 (G3DSA:1.25.40.GENE3D); PTHR24186 (PANTHER); IPR002110 (PROSITE_PROFILES); IPR020683 (PROSITE_PROFILES); IPR002110 (PROSITE_PROFILES); IPR020683 (SUPERFAMILY)                                                                                                                                                                                                                             |
| 765 | 244870_length_413_cvg_2.0_tip_1_5  | 9   | death-associated protein kinase partial                 | 137 | 6.79E-47 | 68.20% | 0.196 | IPR002110 (SMART); IPR020683 (PFAM); IPR020683 (G3DSA:1.25.40.GENE3D); IPR002110 (PFAM); IPR020683 (G3DSA:1.25.40.GENE3D); PTHR22964:SF46 (PANTHER); IPR020675 (PANTHER); IPR002110 (PROSITE_PROFILES); IPR002110 (PROSITE_PROFILES); IPR002110 (PROSITE_PROFILES); IPR020683 (PROSITE_PROFILES); IPR020683 (SUPERFAMILY)                                                                                                                                 |
| 767 | 244928_length_413_cvg_2.0_tip_1_2  | 8   | isoform c                                               | 137 | 7.35E-16 | 66.20% | 0.102 | IPR019149 (PFAM); PTHR13617 (PANTHER)                                                                                                                                                                                                                                                                                                                                                                                                                     |
| 763 | 244754_length_413_cvg_17.9_tip_1_1 | 70  | nidogen- partial                                        | 138 | 1.92E-15 | 51.00% | 0.112 | IPR000716 (SMART); IPR000716 (PFAM); IPR000716 (G3DSA:4.10.800.GENE3D); PTHR12352 (PANTHER); IPR000716 (PROSITE_PATTERNS); IPR000716 (PROSITE_PROFILES); IPR000716 (PROSITE_PROFILES); IPR000716 (SUPERFAMILY); IPR000716 (SUPERFAMILY)                                                                                                                                                                                                                   |
| 764 | 244820_length_413_cvg_4.0_tip_1_0  | 16  | adp-ribosylation factor-like protein 2                  | 138 | 4.49E-26 | 89.20% | 0.12  | IPR006689 (PFAM); IPR027417 (G3DSA:3.40.50.GENE3D); PTHR11711:SF26 (PANTHER); PTHR11711 (PANTHER); IPR027417 (SUPERFAMILY)                                                                                                                                                                                                                                                                                                                                |
| 766 | 244898_length_413_cvg_27.6_tip_1_0 | 159 | inter-alpha-trypsin inhibitor heavy chain h3-like       | 138 | 3.81E-30 | 67.00% | 0.105 | PTHR10338:SF24 (PANTHER); PTHR10338 (PANTHER)                                                                                                                                                                                                                                                                                                                                                                                                             |
| 768 | 245048_length_414_cvg_3.3_tip_1_0  | 17  | conserved hypothetical protein                          | 138 | 8.11E-35 | 71.60% | 0.107 | IPR011030 (G3DSA:1.25.10.GENE3D); IPR015255 (PFAM); IPR001747 (PFAM); IPR015817 (G3DSA:2.20.50.GENE3D); PTHR23345 (PANTHER); PTHR23345:SF11 (PANTHER); IPR011030 (SUPERFAMILY); IPR015819 (SUPERFAMILY)                                                                                                                                                                                                                                                   |
| 769 | 245114_length_414_cvg_2.0_tip_1_5  | 8   | protein twisted gastrulation                            | 138 | 3.82E-16 | 76.40% | 0.169 | IPR006761 (PFAM); PTHR12312:SF15 (PANTHER); IPR006761 (PANTHER)                                                                                                                                                                                                                                                                                                                                                                                           |
| 772 | 245214_length_415_cvg_38.0_tip_1_2 | 189 | cathepsin I                                             | 138 | 1.11E-37 | 89.20% | 0.102 | IPR000668 (PFAM); G3DSA:3.90.70.10 (GENE3D); PTHR12411:SF57 (PANTHER); IPR013128 (PANTHER); IPR025660 (PROSITE_PATTERNS); IPR025661 (PROSITE_PATTERNS); TRANSMEMBRANE (PHOBIUS); NON_CYTOPLASMIC_DOMAIN (PHOBIUS); TRANSMEMBRANE (PHOBIUS); CYTOPLASMIC_DOMAIN (PHOBIUS); CYTOPLASMIC_DOMAIN (PHOBIUS); SSF54001 (SUPERFAMILY); TMhelix (TMHMM); TMhelix (TMHMM)                                                                                          |
| 773 | 245290_length_415_cvg_6.0_tip_1_2  | 23  | laminin subunit gamma- partial                          | 138 | 4.56E-28 | 62.70% | 0.104 | Coil (COILS); Coil (COILS)                                                                                                                                                                                                                                                                                                                                                                                                                                |
| 775 | 245358_length_416_cvg_2.8_tip_1_5  | 14  | plexin- partial                                         | 138 | 1.80E-66 | 84.50% | 0.1   | IPR015943 (G3DSA:2.130.10.GENE3D); IPR001627 (PFAM); PTHR22625:SF16 (PANTHER); PTHR22625 (PANTHER); IPR001627 (PROSITE_PROFILES); IPR001627 (SUPERFAMILY)                                                                                                                                                                                                                                                                                                 |
| 776 | 245384_length_416_cvg_2.0_tip_1_5  | 10  | zinc finger protein 239- partial                        | 138 | 5.33E-36 | 60.10% | 0.105 | IPR015880 (SMART); IPR013087 (G3DSA:3.30.160.GENE3D); IPR013087 (G3DSA:3.30.160.GENE3D); PF13465 (PFAM); IPR013087 (G3DSA:3.30.160.GENE3D); PTHR24409 (PANTHER); IPR007087 (PROSITE_PATTERNS); IPR007087 (PROSITE_PATTERNS); IPR007087 (PROSITE_PATTERNS); IPR007087 (PROSITE_PATTERNS); IPR007087 (PROSITE_PROFILES); IPR007087 (PROSITE_PROFILES); IPR007087 (PROSITE_PROFILES); SSF57667 (SUPERFAMILY); SSF57667 (SUPERFAMILY); SSF57667 (SUPERFAMILY) |
| 777 | 245440_length_416_cvg_2.0_tip_1_5  | 8   | peptidyl-glycine alpha-amidating monooxygenase partial  | 138 | 8.46E-45 | 65.70% | 0.183 | IPR000720 (PRINTS); IPR014784 (G3DSA:2.60.120.GENE3D); PF03712 (PFAM); PTHR10680:SF13 (PANTHER); PTHR10680 (PANTHER); IPR014783 (PROSITE_PATTERNS); IPR008977 (SUPERFAMILY)                                                                                                                                                                                                                                                                               |
| 778 | 245454_length_416_cvg_2.0_tip_1_2  | 7   | cytokine receptor                                       | 138 | 4.61E-38 | 72.70% | 0.125 | IPR013783 (G3DSA:2.60.40.GENE3D); IPR013783 (G3DSA:2.60.40.GENE3D); IPR003961 (PFAM); PTHR10489 (PANTHER); IPR003961 (PROSITE_PROFILES); IPR003961 (PROSITE_PROFILES); IPR003961 (SUPERFAMILY)                                                                                                                                                                                                                                                            |



|     |                                    |      |                                                                      |     |          |        |         |                                                                                                                                                                                                                                                                                                                                                                                                                       |
|-----|------------------------------------|------|----------------------------------------------------------------------|-----|----------|--------|---------|-----------------------------------------------------------------------------------------------------------------------------------------------------------------------------------------------------------------------------------------------------------------------------------------------------------------------------------------------------------------------------------------------------------------------|
| 770 | 245158_length_415_cvg_2.0_tip_1_0  | 8    | big brain                                                            | 139 | 5.81E-45 | 73.00% | 0.424 Y | IPR000425 (PRINTS); IPR000425 (PFAM); IPR023271 (G3DSA:1.20.1080.GENE3D); IPR000425 (PANTHER); PTHR19139:SF85 (PANTHER); IPR022357 (PROSITE_PATTERNS); NON_CYTOPLASMIC_DOMAIN (PHOBIUS); CYTOPLASMIC_DOMAIN (PHOBIUS); CYTOPLASMIC_DOMAIN (PHOBIUS); TRANSMEMBRANE (PHOBIUS); TRANSMEMBRANE (PHOBIUS); IPR023271 (SUPERFAMILY); TMhelix (TMHMM); TMhelix (TMHMM); TMhelix (TMHMM); TMhelix (TMHMM)                    |
| 771 | 245160_length_415_cvg_3.0_tip_1_3  | 12   | venom allergen 3-like                                                | 139 | 7.59E-24 | 51.80% | 0.141   | IPR001283 (PRINTS); IPR014044 (SMART); IPR014044 (PFAM); IPR014044 (G3DSA:3.40.33.GENE3D); IPR001283 (PANTHER); IPR014044 (SUPERFAMILY)                                                                                                                                                                                                                                                                               |
| 774 | 245294_length_415_cvg_73.7_tip_0_3 | 2392 | otogelin- partial                                                    | 139 | 3.86E-06 | 47.00% | 0.117   | no IPS match                                                                                                                                                                                                                                                                                                                                                                                                          |
| 779 | 245708_length_417_cvg_63.0_tip_0_0 | 594  | kunitz bovine pancreatic trypsin inhibitor domain protein            | 139 | 1.29E-36 | 62.70% | 0.102   | IPR002223 (PRINTS); IPR002223 (SMART); IPR002223 (G3DSA:4.10.410.GENE3D); IPR002223 (G3DSA:4.10.410.GENE3D); IPR002223 (PFAM); PTHR10083 (PANTHER); IPR020901 (PROSITE_PATTERNS); IPR020901 (PROSITE_PATTERNS); IPR002223 (PROSITE_PROFILES); IPR002223 (PROSITE_PROFILES); IPR002223 (SUPERFAMILY); IPR002223 (SUPERFAMILY)                                                                                          |
| 780 | 245764_length_417_cvg_2.0_tip_1_5  | 10   | zinc finger protein 45-like                                          | 139 | 2.69E-16 | 62.50% | 0.15    | IPR015880 (SMART); IPR007087 (PFAM); IPR013087 (G3DSA:3.30.160.GENE3D); PF13465 (PFAM); IPR013087 (G3DSA:3.30.160.GENE3D); IPR013087 (G3DSA:3.30.160.GENE3D); PTHR24409 (PANTHER); IPR007087 (PROSITE_PATTERNS); IPR007087 (PROSITE_PATTERNS); IPR007087 (PROSITE_PATTERNS); IPR007087 (PROSITE_PROFILES); IPR007087 (PROSITE_PROFILES); IPR007087 (PROSITE_PROFILES); SSF57667 (SUPERFAMILY); SSF57667 (SUPERFAMILY) |
| 781 | 245782_length_417_cvg_2.0_tip_1_0  | 10   | u5 small nuclear ribonucleoprotein 40 kda protein                    | 139 | 7.74E-90 | 98.80% | 0.101   | IPR020472 (PRINTS); IPR001680 (SMART); IPR015943 (G3DSA:2.130.10.GENE3D); IPR001680 (PFAM); PTHR22847 (PANTHER); IPR019775 (PROSITE_PATTERNS); IPR019775 (PROSITE_PATTERNS); IPR001680 (PROSITE_PROFILES); IPR001680 (PROSITE_PROFILES); IPR017986 (PROSITE_PROFILES); IPR001680 (PROSITE_PROFILES); IPR017986 (SUPERFAMILY)                                                                                          |
| 783 | 246012_length_418_cvg_3.8_tip_1_2  | 20   | tyrosine-protein phosphatase lar isoform x4                          | 139 | 1.45E-69 | 86.40% | 0.109   | PR00014 (PRINTS); IPR003961 (SMART); IPR013783 (G3DSA:2.60.40.GENE3D); IPR013783 (G3DSA:2.60.40.GENE3D); IPR003961 (PFAM); PTHR19134 (PANTHER); PTHR19134:SF204 (PANTHER); IPR003961 (PROSITE_PROFILES); IPR003961 (PROSITE_PROFILES); IPR003961 (SUPERFAMILY)                                                                                                                                                        |
| 782 | 245848_length_418_cvg_5.9_tip_1_0  | 26   | phospholipase b-like partial                                         | 140 | 9.17E-67 | 80.60% | 0.1     | IPR007000 (PFAM); PTHR12370:SF3 (PANTHER); IPR007000 (PANTHER)                                                                                                                                                                                                                                                                                                                                                        |
| 784 | 246118_length_419_cvg_4.3_tip_1_4  | 21   | integrin beta-ps                                                     | 140 | 8.93E-36 | 64.70% | 0.105   | G3DSA:2.10.25.10 (GENE3D); G3DSA:2.10.25.10 (GENE3D); IPR013111 (PFAM); IPR015812 (PANTHER); PTHR10082:SF16 (PANTHER); IPR015812 (PROSITE_PATTERNS); IPR015812 (PROSITE_PATTERNS); SSF57196 (SUPERFAMILY); IPR012896 (SUPERFAMILY)                                                                                                                                                                                    |
| 785 | 246120_length_419_cvg_2.9_tip_1_0  | 15   | tripartite motif-containing protein 2-like isoform x5                | 140 | 1.58E-68 | 85.40% | 0.097   | IPR011042 (G3DSA:2.120.10.GENE3D); IPR001258 (PFAM); PTHR24103 (PANTHER); PTHR24103:SF1 (PANTHER); IPR013017 (PROSITE_PROFILES); IPR013017 (PROSITE_PROFILES); IPR013017 (PROSITE_PROFILES); SSF101898 (SUPERFAMILY)                                                                                                                                                                                                  |
| 786 | 246292_length_420_cvg_3.2_tip_1_2  | 15   | venom serine carboxypeptidase-like                                   | 140 | 1.72E-27 | 67.30% | 0.107   | IPR029058 (G3DSA:3.40.50.GENE3D); IPR001563 (PFAM); IPR001563 (PANTHER); IPR018202 (PROSITE_PATTERNS); IPR029058 (SUPERFAMILY)                                                                                                                                                                                                                                                                                        |
| 787 | 246312_length_420_cvg_4.0_tip_1_5  | 19   | zinc finger protein 358                                              | 140 | 4.48E-29 | 58.70% | 0.101   | IPR015880 (SMART); PF13465 (PFAM); IPR013087 (G3DSA:3.30.160.GENE3D); IPR013087 (G3DSA:3.30.160.GENE3D); PF13894 (PFAM); PTHR24409:SF14 (PANTHER); PTHR24409 (PANTHER); IPR007087 (PROSITE_PATTERNS); IPR007087 (PROSITE_PATTERNS); IPR007087 (PROSITE_PATTERNS); IPR007087 (PROSITE_PROFILES); IPR007087 (PROSITE_PROFILES); IPR007087 (PROSITE_PROFILES); SSF57667 (SUPERFAMILY); SSF57667 (SUPERFAMILY)            |
| 788 | 246364_length_420_cvg_3.0_tip_1_1  | 15   | basement membrane-specific heparan sulfate proteoglycan core protein | 140 | 8.09E-17 | 55.50% | 0.143   | IPR002172 (PRINTS); IPR002172 (SMART); IPR002172 (G3DSA:4.10.400.GENE3D); IPR002172 (G3DSA:4.10.400.GENE3D); IPR002172 (PFAM); PTHR10529 (PANTHER); IPR023415 (PROSITE_PATTERNS); IPR023415 (PROSITE_PATTERNS); IPR002172 (PROSITE_PROFILES); IPR002172 (PROSITE_PROFILES); IPR002172 (SUPERFAMILY); IPR002172 (SUPERFAMILY)                                                                                          |
| 789 | 246500_length_421_cvg_7.6_tip_1_4  | 43   | carbonic anhydrase 1                                                 | 140 | 1.05E-50 | 70.50% | 0.108   | IPR001148 (SMART); IPR001148 (PFAM); IPR001148 (G3DSA:3.10.200.GENE3D); IPR023561 (PANTHER); IPR001148 (PROSITE_PROFILES); IPR001148 (SUPERFAMILY)                                                                                                                                                                                                                                                                    |



|     |                                    |      |                                                                      |     |          |        |       |                                                                                                                                                                                                                                                                                                                                                                                                                                               |
|-----|------------------------------------|------|----------------------------------------------------------------------|-----|----------|--------|-------|-----------------------------------------------------------------------------------------------------------------------------------------------------------------------------------------------------------------------------------------------------------------------------------------------------------------------------------------------------------------------------------------------------------------------------------------------|
| 790 | 246830_length_422_cvg_3.0_tip_1_2  | 13   | basement membrane-specific heparan sulfate proteoglycan core protein | 140 | 7.32E-47 | 69.90% | 0.121 | IPR002049 (SMART); G3DSA:2.10.25.10 (GENE3D); G3DSA:2.10.25.10 (GENE3D); G3DSA:2.10.25.10 (GENE3D); IPR002049 (PFAM); PTHR10574 (PANTHER); PTHR10574:SF148 (PANTHER); IPR013032 (PROSITE_PATTERNS); IPR002049 (PROSITE_PATTERNS); IPR013032 (PROSITE_PATTERNS); IPR002049 (PROSITE_PATTERNS); IPR002049 (PROSITE_PROFILES); IPR002049 (PROSITE_PROFILES); SSF57196 (SUPERFAMILY); SSF57196 (SUPERFAMILY)                                      |
| 791 | 246870_length_422_cvg_2.7_tip_1_2  | 13   | glutamyl aminopeptidase                                              | 140 | 4.04E-14 | 53.30% | 0.114 | IPR024571 (PFAM); IPR001930 (PANTHER); PTHR11533:SF165 (PANTHER) IPR019956 (PRINTS); IPR000626 (SMART); G3DSA:3.10.20.90 (GENE3D); IPR000626 (PFAM); G3DSA:3.10.20.90 (GENE3D); PTHR10666 (PANTHER); IPR019954 (PROSITE_PATTERNS); IPR000626 (PROSITE_PROFILES); IPR000626 (PROSITE_PROFILES); IPR029071 (SUPERFAMILY); IPR029071 (SUPERFAMILY)                                                                                               |
| 792 | 246894_length_423_cvg_13.6_tip_1_4 | 47   | ubiquitin family protein                                             | 141 | 1.44E-72 | 94.30% | 0.139 | IPR015880 (SMART); IPR013087 (G3DSA:3.30.160.GENE3D); IPR013087 (G3DSA:3.30.160.GENE3D); PF13912 (PFAM); IPR013087 (G3DSA:3.30.160.GENE3D); PF13465 (PFAM); PTHR24409 (PANTHER); PTHR24409:SF13 (PANTHER); IPR007087 (PROSITE_PATTERNS); IPR007087 (PROSITE_PATTERNS); IPR007087 (PROSITE_PATTERNS); IPR007087 (PROSITE_PROFILES); IPR007087 (PROSITE_PROFILES); IPR007087 (PROSITE_PROFILES); SSF57667 (SUPERFAMILY); SSF57667 (SUPERFAMILY) |
| 795 | 247390_length_425_cvg_3.5_tip_1_2  | 21   | zinc finger protein 26-like                                          | 141 | 4.37E-22 | 55.80% | 0.12  | IPR002110 (SMART); IPR020683 (G3DSA:1.25.40.GENE3D); IPR020683 (PFAM); IPR020683 (G3DSA:1.25.40.GENE3D); PTHR24202 (PANTHER); PTHR24202:SF52 (PANTHER); IPR002110 (PROSITE_PROFILES); IPR020683 (PROSITE_PROFILES); IPR002110 (PROSITE_PROFILES); IPR002110 (PROSITE_PROFILES); IPR020683 (SUPERFAMILY)                                                                                                                                       |
| 793 | 247138_length_424_cvg_2.0_tip_1_0  | 8    | e3 ubiquitin-protein ligase partial                                  | 142 | 2.53E-80 | 94.40% | 0.135 | IPR002172 (PRINTS); IPR002172 (SMART); IPR002172 (PFAM); IPR002172 (G3DSA:4.10.400.GENE3D); IPR002172 (G3DSA:4.10.400.GENE3D); PTHR10529 (PANTHER); IPR023415 (PROSITE_PATTERNS); IPR023415 (PROSITE_PATTERNS); IPR002172 (PROSITE_PROFILES); IPR002172 (PROSITE_PROFILES); IPR002172 (SUPERFAMILY); IPR002172 (SUPERFAMILY)                                                                                                                  |
| 794 | 247334_length_425_cvg_4.0_tip_1_1  | 20   | very low-density lipoprotein receptor-like                           | 142 | 3.54E-21 | 64.20% | 0.103 | IPR001073 (PRINTS); IPR001073 (SMART); IPR008983 (G3DSA:2.60.120.GENE3D); IPR001073 (PFAM); PTHR22923:SF51 (PANTHER); PTHR22923 (PANTHER); IPR001073 (PROSITE_PROFILES); IPR008983 (SUPERFAMILY)                                                                                                                                                                                                                                              |
| 796 | 247430_length_425_cvg_2.0_tip_1_3  | 14   | complement component q subcomponent-like protein                     | 142 | 5.91E-28 | 62.30% | 0.102 | IPR014853 (PFAM); G3DSA:2.10.25.10 (GENE3D); IPR002919 (SUPERFAMILY)                                                                                                                                                                                                                                                                                                                                                                          |
| 797 | 247494_length_425_cvg_91.9_tip_0_3 | 1593 | c-binding protein                                                    | 142 | 7.49E-09 | 46.80% | 0.135 | PR00011 (PRINTS); IPR002049 (SMART); IPR013032 (PFAM); G3DSA:2.170.300.10 (GENE3D); IPR002049 (PFAM); PTHR24035 (PANTHER); IPR013032 (PROSITE_PATTERNS); IPR013032 (PROSITE_PATTERNS); IPR000742 (PROSITE_PROFILES); IPR000742 (PROSITE_PROFILES)                                                                                                                                                                                             |
| 798 | 247510_length_426_cvg_8.8_tip_1_3  | 36   | multiple epidermal growth factor-like domains protein 10 isoform x1  | 142 | 3.90E-42 | 70.50% | 0.107 | Coil (COILS); IPR006011 (SMART); G3DSA:1.20.58.70 (GENE3D); IPR006011 (PFAM); IPR028669 (PTHR19957:PANTHER); PTHR19957 (PANTHER); IPR010989 (SUPERFAMILY)                                                                                                                                                                                                                                                                                     |
| 799 | 247606_length_426_cvg_3.0_tip_1_4  | 17   | syntaxin 1a                                                          | 142 | 1.39E-96 | 99.30% | 0.101 | G3DSA:2.10.25.10 (GENE3D); PTHR19897:SF158 (PANTHER); PTHR19897 (PANTHER)                                                                                                                                                                                                                                                                                                                                                                     |
| 800 | 247666_length_426_cvg_4.0_tip_1_1  | 18   | hemimentin- partial                                                  | 142 | 1.70E-55 | 65.50% | 0.106 | no IPS match                                                                                                                                                                                                                                                                                                                                                                                                                                  |
| 801 | 247838_length_427_cvg_2.0_tip_1_2  | 13   | repetin                                                              | 142 | 2.47E-14 | 48.20% | 0.1   | IPR016186 (G3DSA:3.10.100.GENE3D); IPR016186 (G3DSA:3.10.100.GENE3D); IPR001304 (PFAM); PTHR22803:SF16 (PANTHER); PTHR22803 (PANTHER); IPR018378 (PROSITE_PATTERNS); IPR001304 (PROSITE_PROFILES); IPR001304 (PROSITE_PROFILES); IPR016187 (SUPERFAMILY); IPR016187 (SUPERFAMILY)                                                                                                                                                             |
| 802 | 247886_length_427_cvg_3.9_tip_1_5  | 21   | macrophage mannose receptor 1                                        | 142 | 5.82E-31 | 60.40% | 0.123 | IPR002126 (SMART); IPR002126 (G3DSA:2.60.40.GENE3D); IPR002126 (PFAM); PTHR24026:SF41 (PANTHER); PTHR24026 (PANTHER); IPR002126 (PROSITE_PROFILES); IPR015919 (SUPERFAMILY)                                                                                                                                                                                                                                                                   |
| 803 | 247934_length_428_cvg_2.0_tip_1_4  | 9    | cadherin-related tumor suppressor                                    | 143 | 1.51E-45 | 71.80% | 0.101 | IPR002110 (SMART); IPR020683 (PFAM); IPR020683 (G3DSA:1.25.40.GENE3D); PTHR24193 (PANTHER); IPR002110 (PROSITE_PROFILES); IPR002110 (PROSITE_PROFILES); IPR020683 (SUPERFAMILY)                                                                                                                                                                                                                                                               |
| 804 | 247950_length_428_cvg_6.1_tip_1_3  | 27   | cd4-specific ankyrin repeat protein                                  | 143 | 3.15E-10 | 69.30% | 0.112 | IPR025887 (PFAM); IPR000322 (PFAM); PTHR22762 (PANTHER); PTHR22762:SF57 (PANTHER); IPR011013 (SUPERFAMILY)                                                                                                                                                                                                                                                                                                                                    |
| 805 | 247964_length_428_cvg_3.0_tip_1_4  | 15   | lysosomal alpha-glucosidase-like isoform x1                          | 143 | 9.82E-67 | 81.40% | 0.116 |                                                                                                                                                                                                                                                                                                                                                                                                                                               |

|     |                                    |     |                                                         |     |          |        |         |                                                                                                                                                                                                                                                                                                                                                                                                                                                           |
|-----|------------------------------------|-----|---------------------------------------------------------|-----|----------|--------|---------|-----------------------------------------------------------------------------------------------------------------------------------------------------------------------------------------------------------------------------------------------------------------------------------------------------------------------------------------------------------------------------------------------------------------------------------------------------------|
| 806 | 247994_length_428_cvg_2.0_tip_1_0  | 9   | receptor-type tyrosine-protein phosphatase partial      | 143 | 6.07E-27 | 62.90% | 0.107   | IPR000242 (PRINTS); IPR003595 (SMART); IPR000242 (PFAM); IPR029021 (G3DSA:3.90.190.GENE3D); PTHR19134 (PANTHER); IPR016130 (PROSITE_PATTERNS); IPR000242 (PROSITE_PROFILES); IPR000387 (PROSITE_PROFILES); IPR029021 (SUPERFAMILY)                                                                                                                                                                                                                        |
| 807 | 248020_length_428_cvg_4.9_tip_1_4  | 18  | n-acetylglucosamine-6-sulfatase-like isoform x3         | 143 | 2.34E-65 | 76.00% | 0.106   | IPR000917 (PFAM); IPR017849 (G3DSA:3.40.720.GENE3D); PTHR10342 (PANTHER); PTHR10342:SF208 (PANTHER); IPR024607 (PROSITE_PATTERNS); IPR017850 (SUPERFAMILY)                                                                                                                                                                                                                                                                                                |
| 808 | 248256_length_430_cvg_2.0_tip_1_2  | 11  | 5 - partial                                             | 143 | 2.22E-29 | 69.90% | 0.106   | IPR004843 (PFAM); IPR029052 (G3DSA:3.60.21.GENE3D); PTHR11575:SF21 (PANTHER); IPR006179 (PANTHER); IPR006146 (PROSITE_PATTERNS); IPR029052 (SUPERFAMILY)                                                                                                                                                                                                                                                                                                  |
| 809 | 248522_length_431_cvg_3.0_tip_1_1  | 12  | transcriptional repressor ctcfi-like isoform x1         | 144 | 6.64E-83 | 93.50% | 0.103   | IPR015880 (SMART); IPR013087 (G3DSA:3.30.160.GENE3D); PF13465 (PFAM); IPR013087 (G3DSA:3.30.160.GENE3D); IPR013087 (G3DSA:3.30.160.GENE3D); IPR013087 (G3DSA:3.30.160.GENE3D); PTHR24375 (PANTHER); PTHR24375:SF1 (PANTHER); IPR007087 (PROSITE_PATTERNS); IPR007087 (PROSITE_PATTERNS); IPR007087 (PROSITE_PROFILES); IPR007087 (PROSITE_PROFILES); IPR007087 (PROSITE_PROFILES); SSF57667 (SUPERFAMILY); SSF57667 (SUPERFAMILY); SSF57667 (SUPERFAMILY) |
| 810 | 248626_length_431_cvg_18.0_tip_1_0 | 103 | glycosyl-phosphatidylinositol-linked carbonic anhydrase | 144 | 5.69E-15 | 54.20% | 0.34    | IPR001148 (PFAM); IPR001148 (G3DSA:3.10.200.GENE3D); IPR023561 (PANTHER); SIGNAL_PEPTIDE_H_REGION (PHOBIUS); NON_CYTOPLASMIC_DOMAIN (PHOBIUS); SIGNAL_PEPTIDE_N_REGION (PHOBIUS); SIGNAL_PEPTIDE (PHOBIUS); SIGNAL_PEPTIDE_C_REGION (PHOBIUS); IPR001148 (PROSITE_PROFILES); IPR001148 (SUPERFAMILY)                                                                                                                                                      |
| 811 | 248652_length_431_cvg_3.0_tip_1_3  | 14  | hemagglutinin amebocyte aggregation factor-like         | 144 | 2.02E-39 | 61.00% | 0.14    | PF14704 (PFAM); IPR026645 (PANTHER)                                                                                                                                                                                                                                                                                                                                                                                                                       |
| 812 | 248662_length_431_cvg_3.4_tip_1_1  | 16  | adam 17-like protease                                   | 144 | 1.34E-46 | 70.80% | 0.106   | IPR002870 (PFAM); PTHR11905:SF121 (PANTHER); PTHR11905 (PANTHER)                                                                                                                                                                                                                                                                                                                                                                                          |
| 813 | 248728_length_432_cvg_3.6_tip_1_4  | 16  | prostaglandin f synthase-like                           | 144 | 9.46E-39 | 73.30% | 0.291   | IPR020471 (PRINTS); IPR023210 (PFAM); IPR023210 (G3DSA:3.20.20.GENE3D); PTHR11732:SF133 (PANTHER); IPR001395 (PANTHER); IPR023210 (SUPERFAMILY)                                                                                                                                                                                                                                                                                                           |
| 814 | 248748_length_432_cvg_5.0_tip_1_5  | 27  | serine protease                                         | 144 | 6.64E-09 | 65.40% | 0.129   | G3DSA:2.40.10.10 (GENE3D); IPR001254 (PFAM); PTHR24268 (PANTHER); IPR009003 (SUPERFAMILY)                                                                                                                                                                                                                                                                                                                                                                 |
| 815 | 248864_length_432_cvg_55.0_tip_1_0 | 459 | kallikrein-11 isoform x2                                | 144 | 2.64E-21 | 65.20% | 0.101   | G3DSA:2.40.10.10 (GENE3D); IPR001254 (PFAM); PTHR24275 (PANTHER); IPR018114 (PROSITE_PATTERNS); IPR001254 (PROSITE_PROFILES); IPR009003 (SUPERFAMILY)                                                                                                                                                                                                                                                                                                     |
| 816 | 248936_length_433_cvg_7.7_tip_1_2  | 34  | latrophilin-2-like isoform x3                           | 144 | 1.41E-21 | 51.70% | 0.498 Y | IPR000832 (PFAM); PTHR12011 (PANTHER); TRANSMEMBRANE (PHOBIUS); TRANSMEMBRANE (PHOBIUS); CYTOPLASMIC_DOMAIN (PHOBIUS); NON_CYTOPLASMIC_DOMAIN (PHOBIUS); CYTOPLASMIC_DOMAIN (PHOBIUS); TRANSMEMBRANE (PHOBIUS); NON_CYTOPLASMIC_DOMAIN (PHOBIUS); IPR017981 (PROSITE_PROFILES); TMhelix (TMHMM); TMhelix (TMHMM); TMhelix (TMHMM)                                                                                                                         |
| 818 | 248982_length_433_cvg_2.0_tip_1_5  | 10  | papilin isoform x1                                      | 144 | 1.68E-45 | 66.00% | 0.101   | IPR002223 (PRINTS); IPR002223 (SMART); IPR002223 (G3DSA:4.10.410.GENE3D); IPR002223 (PFAM); IPR002223 (G3DSA:4.10.410.GENE3D); IPR002223 (G3DSA:4.10.410.GENE3D); PTHR10083 (PANTHER); IPR020901 (PROSITE_PATTERNS); IPR020901 (PROSITE_PATTERNS); IPR002223 (PROSITE_PROFILES); IPR002223 (PROSITE_PROFILES); IPR002223 (PROSITE_PROFILES); IPR002223 (SUPERFAMILY); IPR002223 (SUPERFAMILY); IPR002223 (SUPERFAMILY)                                    |
| 819 | 249056_length_433_cvg_2.8_tip_1_2  | 14  | dnaj homolog subfamily c member 3                       | 144 | 3.27E-51 | 72.00% | 0.103   | Coil (COILS); IPR019734 (SMART); PF13414 (PFAM); IPR011990 (G3DSA:1.25.40.GENE3D); PTHR24078:SF132 (PANTHER); PTHR24078 (PANTHER); IPR019734 (PROSITE_PROFILES); IPR013026 (PROSITE_PROFILES); SSF48452 (SUPERFAMILY)                                                                                                                                                                                                                                     |
| 820 | 249062_length_433_cvg_3.6_tip_1_5  | 23  | meprin a subunit beta-like                              | 144 | 6.10E-29 | 61.30% | 0.268   | IPR001506 (PRINTS); IPR001506 (PFAM); IPR024079 (G3DSA:3.40.390.GENE3D); PTHR10127 (PANTHER); SSF55486 (SUPERFAMILY)                                                                                                                                                                                                                                                                                                                                      |
| 821 | 249102_length_434_cvg_5.0_tip_1_5  | 24  | calcium calmodulin-dependent serine protein kinase      | 144 | 1.26E-46 | 73.60% | 0.099   | IPR001478 (SMART); IPR001478 (PFAM); G3DSA:2.30.30.40 (GENE3D); IPR001478 (G3DSA:2.30.42.GENE3D); PTHR23122 (PANTHER); IPR001478 (PROSITE_PROFILES); IPR001478 (SUPERFAMILY)                                                                                                                                                                                                                                                                              |
| 823 | 249306_length_434_cvg_3.4_tip_1_5  | 26  | peptidoglycan linked protein                            | 144 | 5.07E-08 | 49.63% | 0.164   | no IPS match                                                                                                                                                                                                                                                                                                                                                                                                                                              |
| 817 | 248976_length_433_cvg_2.0_tip_1_0  | 11  | sh3 domain protein                                      | 145 | 7.14E-08 | 66.00% | 0.102   | no IPS match                                                                                                                                                                                                                                                                                                                                                                                                                                              |
| 822 | 249250_length_434_cvg_2.0_tip_1_4  | 7   | adam 17-like protease                                   | 145 | 2.36E-73 | 86.80% | 0.1     | PTHR11905:SF121 (PANTHER); PTHR11905 (PANTHER); TRANSMEMBRANE (PHOBIUS); NON_CYTOPLASMIC_DOMAIN (PHOBIUS); CYTOPLASMIC_DOMAIN (PHOBIUS); TMhelix (TMHMM)                                                                                                                                                                                                                                                                                                  |
| 825 | 249530_length_436_cvg_3.0_tip_1_1  | 16  | deoxyribonuclease- partial                              | 145 | 1.44E-31 | 64.70% | 0.114   | IPR016202 (PRINTS); IPR016202 (SMART); IPR005135 (G3DSA:3.60.10.GENE3D); IPR016202 (PANTHER); IPR005135 (SUPERFAMILY)                                                                                                                                                                                                                                                                                                                                     |

|     |                                    |      |                                                                           |     |          |        |       |                                                                                                                                                                                                                                                                                                                                                                                                                                                  |
|-----|------------------------------------|------|---------------------------------------------------------------------------|-----|----------|--------|-------|--------------------------------------------------------------------------------------------------------------------------------------------------------------------------------------------------------------------------------------------------------------------------------------------------------------------------------------------------------------------------------------------------------------------------------------------------|
| 826 | 249672_length_436_cvg_8.5_tip_1_1  | 24   | heterochromatin-associated protein ment- partial                          | 145 | 1.11E-10 | 77.40% | 0.107 | IPR023796 (PFAM); G3DSA:2.30.39.10 (GENE3D); PTHR11461:SF52 (PANTHER); IPR000215 (PANTHER); IPR023795 (PROSITE_PATTERNS); CYTOPLASMIC_DOMAIN (PHOBIUS); TRANSMEMBRANE (PHOBIUS); NON_CYTOPLASMIC_DOMAIN (PHOBIUS); IPR023796 (SUPERFAMILY)                                                                                                                                                                                                       |
| 828 | 249838_length_437_cvg_53.4_tip_1_5 | 2778 | ribosomal protein s26                                                     | 145 | 1.78E-59 | 89.80% | 0.107 | IPR000892 (PFAM); IPR000892 (PANTHER); IPR000892 (PROSITE_PATTERNS)                                                                                                                                                                                                                                                                                                                                                                              |
| 830 | 249868_length_437_cvg_2.2_tip_1_5  | 8    | leucine-rich repeat neuronal protein 2                                    | 145 | 7.77E-19 | 53.70% | 0.101 | G3DSA:3.80.10.10 (GENE3D); IPR001611 (PFAM); PTHR24373:SF111 (PANTHER); PTHR24373 (PANTHER); SSF52058 (SUPERFAMILY)                                                                                                                                                                                                                                                                                                                              |
| 824 | 249526_length_436_cvg_2.0_tip_1_0  | 15   | vascular endothelial growth factor receptor partial                       | 146 | 7.62E-17 | 49.00% | 0.137 | IPR003598 (SMART); IPR003599 (SMART); IPR013106 (PFAM); IPR013783 (G3DSA:2.60.40.GENE3D); IPR007110 (PROSITE_PROFILES); SSF48726 (SUPERFAMILY)                                                                                                                                                                                                                                                                                                   |
| 827 | 249676_length_436_cvg_5.0_tip_1_0  | 26   | low-density lipoprotein receptor-related protein 1b                       | 146 | 8.20E-14 | 57.50% | 0.106 | IPR002172 (SMART); IPR002172 (PFAM); G3DSA:4.10.1220.10 (GENE3D); IPR002172 (G3DSA:4.10.400.GENE3D); PTHR10529 (PANTHER); IPR002172 (PROSITE_PROFILES); IPR002172 (SUPERFAMILY); IPR002172 (SUPERFAMILY)                                                                                                                                                                                                                                         |
| 829 | 249844_length_437_cvg_4.0_tip_1_4  | 16   | myosin light chain smooth muscle                                          | 146 | 2.88E-67 | 86.20% | 0.1   | Coil (COILS); IPR013783 (G3DSA:2.60.40.GENE3D); IPR013098 (PFAM); IPR013783 (G3DSA:2.60.40.GENE3D); PTHR19897:SF150 (PANTHER); PTHR19897 (PANTHER); IPR007110 (PROSITE_PROFILES); IPR007110 (PROSITE_PROFILES); SSF48726 (SUPERFAMILY); SSF48726 (SUPERFAMILY)                                                                                                                                                                                   |
| 831 | 249900_length_437_cvg_5.8_tip_1_1  | 23   | disintegrin and metalloproteinase domain-containing protein 10 isoform x1 | 146 | 5.90E-39 | 69.90% | 0.111 | IPR001762 (SMART); IPR001762 (G3DSA:4.10.70.GENE3D); IPR001762 (PFAM); PTHR11905:SF4 (PANTHER); PTHR11905 (PANTHER); IPR001762 (PROSITE_PROFILES); IPR001762 (SUPERFAMILY)                                                                                                                                                                                                                                                                       |
| 832 | 250054_length_438_cvg_4.8_tip_1_2  | 21   | gamma-glutamyl hydrolase a-like isoform x3                                | 146 | 7.41E-23 | 61.40% | 0.114 | IPR029062 (G3DSA:3.40.50.GENE3D); IPR015527 (PANTHER); IPR015527 (PROSITE_PROFILES); IPR029062 (SUPERFAMILY)                                                                                                                                                                                                                                                                                                                                     |
| 834 | 250112_length_439_cvg_6.6_tip_1_4  | 36   | heat shock protein                                                        | 146 | 7.82E-64 | 83.70% | 0.101 | IPR013126 (PRINTS); G3DSA:3.30.420.40 (GENE3D); IPR013126 (PFAM); IPR029047 (G3DSA:2.60.34.GENE3D); PTHR19375:SF142 (PANTHER); PTHR19375 (PANTHER); IPR029047 (SUPERFAMILY); SSF53067 (SUPERFAMILY)                                                                                                                                                                                                                                              |
| 835 | 250228_length_440_cvg_2.0_tip_1_5  | 8    | calcium-activated chloride channel regulator 1-like                       | 146 | 2.88E-28 | 61.00% | 0.136 | IPR002035 (G3DSA:3.40.50.GENE3D); PF13519 (PFAM); PTHR10579:SF8 (PANTHER); PTHR10579 (PANTHER); IPR002035 (PROSITE_PROFILES); IPR002035 (SUPERFAMILY)                                                                                                                                                                                                                                                                                            |
| 833 | 250100_length_439_cvg_2.9_tip_1_0  | 15   | cationic trypsin- partial                                                 | 147 | 1.53E-30 | 56.30% | 0.105 | IPR001254 (SMART); IPR001254 (PFAM); G3DSA:2.40.10.10 (GENE3D); G3DSA:2.40.10.10 (GENE3D); PTHR24265 (PANTHER); IPR001254 (PROSITE_PROFILES); IPR009003 (SUPERFAMILY)                                                                                                                                                                                                                                                                            |
| 836 | 250340_length_440_cvg_38.6_tip_1_3 | 189  | hemagglutinin amebocyte aggregation factor-like                           | 147 | 1.23E-27 | 65.70% | 0.113 | PF14704 (PFAM); IPR026645 (PANTHER); TMhelix (TMHMM)                                                                                                                                                                                                                                                                                                                                                                                             |
| 837 | 250380_length_441_cvg_2.8_tip_1_0  | 12   | zinc finger protein 420-like                                              | 147 | 3.61E-33 | 62.80% | 0.098 | IPR015880 (SMART); IPR013087 (G3DSA:3.30.160.GENE3D); PF13465 (PFAM); IPR013087 (G3DSA:3.30.160.GENE3D); PTHR24409 (PANTHER); PTHR24409:SF13 (PANTHER); IPR007087 (PROSITE_PATTERNS); IPR007087 (PROSITE_PATTERNS); IPR007087 (PROSITE_PATTERNS); IPR007087 (PROSITE_PROFILES); IPR007087 (PROSITE_PROFILES); IPR007087 (PROSITE_PROFILES); IPR007087 (PROSITE_PROFILES); SSF57667 (SUPERFAMILY); SSF57667 (SUPERFAMILY); SSF57667 (SUPERFAMILY) |
| 838 | 250440_length_441_cvg_8.0_tip_1_5  | 43   | alpha-2-macroglobulin-like protein 1 isoform x2                           | 147 | 2.17E-21 | 54.10% | 0.191 | IPR011625 (PFAM); PTHR11412 (PANTHER); PTHR11412:SF80 (PANTHER)                                                                                                                                                                                                                                                                                                                                                                                  |
| 839 | 250466_length_441_cvg_4.0_tip_1_3  | 13   | trypsinogen 2                                                             | 147 | 5.53E-28 | 72.40% | 0.102 | IPR001254 (PFAM); G3DSA:2.40.10.10 (GENE3D); PTHR24268 (PANTHER); IPR018114 (PROSITE_PATTERNS); TRANSMEMBRANE (PHOBIUS); CYTOPLASMIC_DOMAIN (PHOBIUS); NON_CYTOPLASMIC_DOMAIN (PHOBIUS); IPR001254 (PROSITE_PROFILES); IPR009003 (SUPERFAMILY)                                                                                                                                                                                                   |
| 840 | 250554_length_442_cvg_4.0_tip_1_1  | 22   | disintegrin and metalloproteinase domain-containing protein 10 isoform x3 | 147 | 2.38E-45 | 67.90% | 0.162 | PTHR11905:SF4 (PANTHER); PTHR11905 (PANTHER); TRANSMEMBRANE (PHOBIUS); CYTOPLASMIC_DOMAIN (PHOBIUS); NON_CYTOPLASMIC_DOMAIN (PHOBIUS); TMhelix (TMHMM)                                                                                                                                                                                                                                                                                           |
| 841 | 250628_length_442_cvg_13.7_tip_1_1 | 46   | leukocyte elastase inhibitor                                              | 147 | 7.38E-26 | 55.70% | 0.101 | G3DSA:3.30.497.10 (GENE3D); IPR023796 (PFAM); G3DSA:2.30.39.10 (GENE3D); IPR000215 (PANTHER); PTHR11461:SF141 (PANTHER); IPR023796 (SUPERFAMILY)                                                                                                                                                                                                                                                                                                 |
| 842 | 250648_length_442_cvg_3.0_tip_1_1  | 13   | polypeptide n-acetylgalactosaminyltransferase 2                           | 147 | 1.62E-12 | 55.50% | 0.103 | IPR000772 (PFAM); G3DSA:2.80.10.50 (GENE3D); PTHR11675 (PANTHER); PTHR11675:SF24 (PANTHER); IPR000772 (PROSITE_PROFILES); IPR000772 (SUPERFAMILY)                                                                                                                                                                                                                                                                                                |
| 843 | 250772_length_443_cvg_4.6_tip_1_5  | 23   | interstitial collagenase                                                  | 147 | 2.13E-58 | 74.30% | 0.105 | IPR021190 (PRINTS); IPR006026 (SMART); IPR001818 (PFAM); IPR024079 (G3DSA:3.40.390.GENE3D); PTHR10201 (PANTHER); SSF55486 (SUPERFAMILY)                                                                                                                                                                                                                                                                                                          |
| 844 | 251008_length_444_cvg_4.0_tip_1_0  | 21   | heat shock 70 kda protein cognate 4- partial                              | 148 | 1.17E-25 | 79.70% | 0.121 | Coil (COILS); G3DSA:3.30.420.40 (GENE3D); IPR013126 (PFAM); PTHR19375 (PANTHER); SSF53067 (SUPERFAMILY)                                                                                                                                                                                                                                                                                                                                          |
| 845 | 251064_length_444_cvg_7.0_tip_1_3  | 35   | cyclin-g-associated kinase                                                | 148 | 6.63E-54 | 77.40% | 0.106 | IPR029021 (G3DSA:3.90.190.GENE3D); IPR000340 (PFAM); PTHR23172 (PANTHER); PTHR23172:SF19 (PANTHER); IPR029023 (PROSITE_PROFILES); IPR029021 (SUPERFAMILY)                                                                                                                                                                                                                                                                                        |

|     |                                    |     |                                                                                          |     |          |        |       |                                                                                                                                                                                                                                                                                                                                                                                                                                                          |
|-----|------------------------------------|-----|------------------------------------------------------------------------------------------|-----|----------|--------|-------|----------------------------------------------------------------------------------------------------------------------------------------------------------------------------------------------------------------------------------------------------------------------------------------------------------------------------------------------------------------------------------------------------------------------------------------------------------|
| 846 | 251098_length_444_cvg_4.0_tip_1_3  | 19  | c-type mannose receptor 2                                                                | 148 | 1.59E-11 | 48.20% | 0.108 | IPR016186 (G3DSA:3.10.100.GENE3D); IPR016186 (G3DSA:3.10.100.GENE3D); IPR001304 (PFAM); PTHR22803 (PANTHER); IPR001304 (PROSITE_PROFILES); IPR016187 (SUPERFAMILY); IPR016187 (SUPERFAMILY)                                                                                                                                                                                                                                                              |
| 848 | 251174_length_445_cvg_3.0_tip_1_2  | 18  | histone-lysine n-methyltransferase prdm9                                                 | 148 | 6.85E-39 | 65.60% | 0.097 | IPR015880 (SMART); IPR013087 (G3DSA:3.30.160.GENE3D); IPR013087 (G3DSA:3.30.160.GENE3D); IPR013087 (G3DSA:3.30.160.GENE3D); PF13465 (PFAM); IPR007087 (PFAM); IPR013087 (G3DSA:3.30.160.GENE3D); PTHR24409 (PANTHER); IPR007087 (PROSITE_PATTERNS); IPR007087 (PROSITE_PATTERNS); IPR007087 (PROSITE_PATTERNS); IPR007087 (PROSITE_PROFILES); IPR007087 (PROSITE_PROFILES); IPR007087 (PROSITE_PROFILES); SSF57667 (SUPERFAMILY); SSF57667 (SUPERFAMILY) |
| 849 | 251450_length_446_cvg_5.0_tip_1_5  | 22  | calcium calmodulin-dependent protein kinase                                              | 148 | 7.64E-88 | 92.30% | 0.128 | IPR008145 (SMART); G3DSA:3.30.63.10 (GENE3D); IPR027417 (G3DSA:3.40.50.GENE3D); IPR008145 (PFAM); PTHR23122 (PANTHER); PTHR23122:SF7 (PANTHER); IPR020590 (PROSITE_PATTERNS); IPR008144 (PROSITE_PROFILES); IPR027417 (SUPERFAMILY)                                                                                                                                                                                                                      |
| 847 | 251166_length_445_cvg_3.9_tip_1_3  | 15  | beta-ketoacyl partial                                                                    | 149 | 1.14E-12 | 54.20% | 0.1   | SignalP-TM (SIGNALP_GRAM_POSITIVE)                                                                                                                                                                                                                                                                                                                                                                                                                       |
| 850 | 251728_length_447_cvg_3.4_tip_1_4  | 16  | g protein-coupled receptor kinase 2                                                      | 149 | 1.78E-91 | 94.00% | 0.103 | Coil (COILS); IPR002290 (SMART); IPR000719 (PFAM); G3DSA:1.10.510.10 (GENE3D); PTHR24355:SF24 (PANTHER); PTHR24355 (PANTHER); IPR000719 (PROSITE_PROFILES); IPR011009 (SUPERFAMILY)                                                                                                                                                                                                                                                                      |
| 852 | 251978_length_449_cvg_4.0_tip_1_5  | 17  | serine threonine-protein kinase genghis khan isoform x1                                  | 149 | 5.57E-81 | 98.50% | 0.118 | IPR002290 (SMART); G3DSA:1.10.510.10 (GENE3D); IPR000719 (PFAM); PTHR22988 (PANTHER); PTHR22988:SF2 (PANTHER); IPR008271 (PROSITE_PATTERNS); IPR000719 (PROSITE_PROFILES); IPR011009 (SUPERFAMILY)                                                                                                                                                                                                                                                       |
| 851 | 251738_length_448_cvg_2.0_tip_1_3  | 13  | matrix metalloproteinase-17 isoform x2                                                   | 150 | 2.08E-29 | 52.40% | 0.104 | IPR000585 (G3DSA:2.110.10.GENE3D); IPR018487 (PFAM); IPR001818 (PFAM); IPR024079 (G3DSA:3.40.390.GENE3D); PTHR10201:SF135 (PANTHER); PTHR10201 (PANTHER); IPR018487 (PROSITE_PROFILES); IPR000585 (SUPERFAMILY); SSF55486 (SUPERFAMILY)                                                                                                                                                                                                                  |
| 853 | 252028_length_449_cvg_4.2_tip_1_3  | 18  | von willebrand factor type egf and pentraxin domain-containing protein 1-like isoform x2 | 150 | 1.41E-34 | 62.20% | 0.112 | IPR000742 (SMART); G3DSA:2.10.25.10 (GENE3D); IPR013032 (PFAM); G3DSA:2.10.25.10 (GENE3D); PTHR19325 (PANTHER); PTHR19325:SF43 (PANTHER); IPR013032 (PROSITE_PATTERNS); IPR013032 (PROSITE_PATTERNS); IPR013032 (PROSITE_PATTERNS); IPR000742 (PROSITE_PROFILES); IPR000742 (PROSITE_PROFILES); IPR000436 (PROSITE_PROFILES); IPR000742 (PROSITE_PROFILES); SSF57196 (SUPERFAMILY); IPR000436 (SUPERFAMILY)                                              |
| 854 | 252070_length_450_cvg_8.6_tip_1_0  | 35  | locomotion-related protein hikaru genki                                                  | 150 | 1.84E-23 | 48.60% | 0.12  | IPR000436 (SMART); IPR000436 (PFAM); G3DSA:2.10.70.10 (GENE3D); G3DSA:2.10.70.10 (GENE3D); G3DSA:2.10.70.10 (GENE3D); PTHR19325 (PANTHER); IPR000436 (PROSITE_PROFILES); IPR000436 (PROSITE_PROFILES); IPR000436 (SUPERFAMILY); IPR000436 (SUPERFAMILY)                                                                                                                                                                                                  |
| 855 | 252158_length_450_cvg_3.0_tip_1_1  | 21  | low-density lipoprotein receptor-related protein 2                                       | 150 | 6.76E-07 | 64.75% | 0.147 | IPR002172 (SMART); IPR002172 (G3DSA:4.10.400.GENE3D); IPR002172 (PFAM); IPR002172 (PROSITE_PROFILES); IPR002172 (SUPERFAMILY)                                                                                                                                                                                                                                                                                                                            |
| 856 | 252202_length_450_cvg_3.0_tip_1_0  | 11  | slei family protein                                                                      | 150 | 7.06E-17 | 52.60% | 0.096 | TRANSMEMBRANE (PHOBIUS); NON_CYTOPLASMIC_DOMAIN (PHOBIUS); CYTOPLASMIC_DOMAIN (PHOBIUS); TMhelix (TMHMM)                                                                                                                                                                                                                                                                                                                                                 |
| 857 | 252272_length_451_cvg_3.2_tip_1_0  | 18  | cysteine proteinase                                                                      | 151 | 1.36E-58 | 76.20% | 0.112 | IPR000668 (SMART); IPR013201 (PFAM); G3DSA:3.90.70.10 (GENE3D); IPR000668 (PFAM); PTHR12411:SF316 (PANTHER); IPR013128 (PANTHER); IPR000169 (PROSITE_PATTERNS); SSF54001 (SUPERFAMILY)                                                                                                                                                                                                                                                                   |
| 858 | 252600_length_452_cvg_11.0_tip_1_3 | 70  | dermatopontin 2                                                                          | 151 | 2.34E-07 | 76.50% | 0.166 | PF14704 (PFAM); IPR026645 (PANTHER)                                                                                                                                                                                                                                                                                                                                                                                                                      |
| 859 | 252744_length_453_cvg_81.7_tip_0_1 | 741 | fibrinogen-related protein                                                               | 151 | 4.74E-44 | 66.90% | 0.104 | IPR002181 (SMART); IPR014716 (G3DSA:3.90.215.GENE3D); IPR002181 (PFAM); IPR014715 (G3DSA:4.10.530.GENE3D); PTHR19143 (PANTHER); IPR020837 (PROSITE_PATTERNS); IPR002181 (PROSITE_PROFILES); IPR002181 (SUPERFAMILY)                                                                                                                                                                                                                                      |
| 860 | 252914_length_454_cvg_3.5_tip_1_3  | 15  | lysosomal pro-x carboxypeptidase                                                         | 152 | 3.80E-10 | 79.00% | 0.117 | PTHR11010:SF11 (PANTHER); IPR008758 (PANTHER); CYTOPLASMIC_DOMAIN (PHOBIUS); TRANSMEMBRANE (PHOBIUS); NON_CYTOPLASMIC_DOMAIN (PHOBIUS)                                                                                                                                                                                                                                                                                                                   |
| 861 | 253336_length_457_cvg_4.0_tip_1_4  | 20  | dnak protein                                                                             | 152 | 1.39E-77 | 88.30% | 0.119 | IPR013126 (PRINTS); G3DSA:3.30.420.40 (GENE3D); IPR013126 (PFAM); G3DSA:3.30.420.40 (GENE3D); PTHR19375:SF142 (PANTHER); PTHR19375 (PANTHER); IPR018181 (PROSITE_PATTERNS); SSF53067 (SUPERFAMILY)                                                                                                                                                                                                                                                       |
| 863 | 253506_length_457_cvg_4.1_tip_1_1  | 23  | heat shock 70 kda protein 14                                                             | 152 | 2.63E-28 | 52.90% | 0.148 | IPR029047 (G3DSA:2.60.34.GENE3D); IPR013126 (PFAM); PTHR19375 (PANTHER); PTHR19375:SF158 (PANTHER); IPR029047 (SUPERFAMILY)                                                                                                                                                                                                                                                                                                                              |



|     |                                     |       |                                                                          |     |           |        |         |                                                                                                                                                                                                                                                                                                                                                                                                                                                                                                                                                                                            |
|-----|-------------------------------------|-------|--------------------------------------------------------------------------|-----|-----------|--------|---------|--------------------------------------------------------------------------------------------------------------------------------------------------------------------------------------------------------------------------------------------------------------------------------------------------------------------------------------------------------------------------------------------------------------------------------------------------------------------------------------------------------------------------------------------------------------------------------------------|
| 865 | 253680_length_458_cvg_3.0_tip_1_5   | 18    | pro-phenol oxidase subunit 2                                             | 152 | 3.78E-41  | 62.70% | 0.11    | IPR008922 (G3DSA:1.10.1280.GENE3D); IPR005203 (G3DSA:2.60.40.GENE3D); IPR000896 (PFAM); IPR005203 (PFAM); PTHR11511:SF24 (PANTHER); IPR013788 (PANTHER); IPR013788 (PROSITE_PATTERNS); IPR002227 (PROSITE_PATTERNS); IPR014756 (SUPERFAMILY); IPR008922 (SUPERFAMILY)                                                                                                                                                                                                                                                                                                                      |
| 862 | 253386_length_457_cvg_2.0_tip_1_3   | 11    | leucine-rich repeat-containing protein 15-like                           | 153 | 7.65E-37  | 65.70% | 0.101   | IPR003591 (SMART); SM00365 (SMART); IPR001611 (PFAM); G3DSA:3.80.10.10 (GENE3D); IPR001611 (PFAM); IPR001611 (PFAM); PTHR24365 (PANTHER); IPR001611 (PROSITE_PROFILES); IPR001611 (PROSITE_PATTERNS); IPR001611 (PROSITE_PROFILES); IPR001611 (PROSITE_PROFILES); SSF52058 (SUPERFAMILY)                                                                                                                                                                                                                                                                                                   |
| 864 | 253582_length_458_cvg_4.7_tip_1_0   | 25    | collagen alpha-1 chain isoform x5                                        | 153 | 1.50E-10  | 50.10% | 0.136   | IPR010515 (PFAM)                                                                                                                                                                                                                                                                                                                                                                                                                                                                                                                                                                           |
| 866 | 253902_length_460_cvg_3.0_tip_1_5   | 13    | gastrula zinc finger protein                                             | 153 | 9.58E-15  | 59.20% | 0.104   | IPR015880 (SMART); IPR013087 (G3DSA:3.30.160.GENE3D); PF13465 (PFAM); IPR007087 (PROSITE_PATTERNS); IPR007087 (PROSITE_PROFILES); IPR007087 (PROSITE_PROFILES); SSF57667 (SUPERFAMILY)                                                                                                                                                                                                                                                                                                                                                                                                     |
| 867 | 253922_length_460_cvg_2.0_tip_1_4   | 6     | von willebrand factor type egf and pentraxin domain-containing protein 1 | 153 | 4.39E-28  | 54.50% | 0.1     | IPR000436 (SMART); G3DSA:2.10.70.10 (GENE3D); IPR000436 (PFAM); G3DSA:2.10.70.10 (GENE3D); PTHR19325 (PANTHER); IPR000436 (PROSITE_PROFILES); IPR000436 (PROSITE_PROFILES); IPR000436 (PROSITE_PROFILES); IPR000436 (SUPERFAMILY); IPR000436 (SUPERFAMILY); IPR000436 (SUPERFAMILY)                                                                                                                                                                                                                                                                                                        |
| 868 | 254136_length_461_cvg_110.7_tip_0_1 | 52567 | hc subunit partial                                                       | 154 | 8.99E-100 | 77.00% | 0.1     | IPR000896 (PFAM); IPR008922 (G3DSA:1.10.1280.GENE3D); IPR005203 (G3DSA:2.60.40.GENE3D); IPR005203 (PFAM); PTHR11511:SF5 (PANTHER); IPR013788 (PANTHER); IPR013788 (PROSITE_PATTERNS); IPR002227 (PROSITE_PATTERNS); IPR008922 (SUPERFAMILY); IPR014756 (SUPERFAMILY)                                                                                                                                                                                                                                                                                                                       |
| 869 | 254348_length_463_cvg_2.7_tip_1_5   | 15    | ww domain-containing oxidoreductase-like                                 | 154 | 5.14E-48  | 80.80% | 0.124   | IPR001202 (SMART); IPR001202 (PFAM); IPR016040 (G3DSA:3.40.50.GENE3D); G3DSA:2.20.70.10 (GENE3D); PTHR24310:SF30 (PANTHER); PTHR24310 (PANTHER); IPR001202 (PROSITE_PROFILES); SSF51735 (SUPERFAMILY); IPR001202 (SUPERFAMILY)                                                                                                                                                                                                                                                                                                                                                             |
| 870 | 254370_length_463_cvg_7.0_tip_1_2   | 36    | von willebrand factor a domain-containing protein 8                      | 154 | 4.46E-44  | 84.40% | 0.107   | PTHR21610:SF9 (PANTHER); PTHR21610 (PANTHER)                                                                                                                                                                                                                                                                                                                                                                                                                                                                                                                                               |
| 871 | 254442_length_463_cvg_3.2_tip_1_2   | 17    | protein flightless-1-like                                                | 154 | 2.73E-49  | 94.50% | 0.102   | IPR007122 (PRINTS); IPR007122 (SMART); IPR029006 (G3DSA:3.40.20.GENE3D); IPR007123 (PFAM); IPR029919 (PTHR11977:PANTHER); IPR007122 (PANTHER); SSF55753 (SUPERFAMILY)                                                                                                                                                                                                                                                                                                                                                                                                                      |
| 872 | 254482_length_463_cvg_2.0_tip_1_5   | 13    | adp-ribosylation factor-like protein 2                                   | 154 | 1.10E-71  | 95.90% | 0.285   | IPR006689 (PRINTS); IPR024156 (SMART); IPR027417 (G3DSA:3.40.50.GENE3D); IPR006689 (PFAM); IPR005225 (TIGRFAM); PTHR11711 (PANTHER); PTHR11711:SF26 (PANTHER); CYTOPLASMIC_DOMAIN (PHOBIUS); TRANSMEMBRANE (PHOBIUS); NON_CYTOPLASMIC_DOMAIN (PHOBIUS); IPR024156 (PROSITE_PROFILES); IPR027417 (SUPERFAMILY); TMhelix (TMHMM)                                                                                                                                                                                                                                                             |
| 874 | 254574_length_464_cvg_2.0_tip_1_5   | 9     | zinc finger protein partial                                              | 154 | 1.09E-69  | 81.20% | 0.101   | IPR015880 (SMART); PF13912 (PFAM); IPR013087 (G3DSA:3.30.160.GENE3D); IPR013087 (G3DSA:3.30.160.GENE3D); PF13465 (PFAM); IPR013087 (G3DSA:3.30.160.GENE3D); PTHR24409 (PANTHER); IPR007087 (PROSITE_PATTERNS); IPR007087 (PROSITE_PATTERNS); IPR007087 (PROSITE_PATTERNS); IPR007087 (PROSITE_PATTERNS); IPR007087 (PROSITE_PROFILES); IPR007087 (PROSITE_PROFILES); IPR007087 (PROSITE_PROFILES); IPR007087 (PROSITE_PROFILES); IPR007087 (PROSITE_PROFILES); SSF57667 (SUPERFAMILY); SSF57667 (SUPERFAMILY); SSF57667 (SUPERFAMILY)                                                      |
| 873 | 254526_length_464_cvg_2.7_tip_1_0   | 11    | fibrillin-2-like                                                         | 155 | 2.37E-61  | 77.50% | 0.101   | IPR000742 (SMART); IPR001881 (SMART); G3DSA:2.10.25.10 (GENE3D); G3DSA:2.10.25.10 (GENE3D); IPR001881 (PFAM); PTHR24039:SF20 (PANTHER); IPR011398 (PANTHER); IPR000152 (PROSITE_PATTERNS); IPR000152 (PROSITE_PATTERNS); IPR018097 (PROSITE_PATTERNS); IPR018097 (PROSITE_PATTERNS); IPR013032 (PROSITE_PATTERNS); IPR018097 (PROSITE_PATTERNS); IPR000152 (PROSITE_PATTERNS); IPR013032 (PROSITE_PATTERNS); IPR013032 (PROSITE_PATTERNS); IPR000742 (PROSITE_PROFILES); IPR000742 (PROSITE_PROFILES); IPR000742 (PROSITE_PROFILES); IPR000742 (PROSITE_PROFILES); IPR009030 (SUPERFAMILY) |
| 875 | 254678_length_465_cvg_9.1_tip_1_1   | 43    | spindolin-related protein                                                | 155 | 2.96E-40  | 57.80% | 0.102   | G3DSA:2.70.50.50 (GENE3D); IPR004302 (PFAM); IPR014756 (SUPERFAMILY)                                                                                                                                                                                                                                                                                                                                                                                                                                                                                                                       |
| 876 | 254710_length_465_cvg_27.0_tip_1_0  | 100   | atrial natriuretic peptide-converting enzyme                             | 155 | 5.47E-08  | 53.70% | 0.519 Y | IPR002172 (PRINTS); IPR002172 (G3DSA:4.10.400.GENE3D); IPR002172 (G3DSA:4.10.400.GENE3D); SIGNAL_PEPTIDE_C_REGION (PHOBIUS); SIGNAL_PEPTIDE (PHOBIUS); NON_CYTOPLASMIC_DOMAIN (PHOBIUS); SIGNAL_PEPTIDE_H_REGION (PHOBIUS); SIGNAL_PEPTIDE_N_REGION (PHOBIUS); SignalP-TM (SIGNALP_EUK); SignalP-TM (SIGNALP_GRAM_POSITIVE); IPR002172 (SUPERFAMILY); IPR002172 (SUPERFAMILY); TMhelix (TMHMM)                                                                                                                                                                                             |
| 877 | 254736_length_465_cvg_3.0_tip_1_4   | 15    | laminin subunit alpha                                                    | 155 | 1.71E-64  | 74.70% | 0.096   | no IPS match                                                                                                                                                                                                                                                                                                                                                                                                                                                                                                                                                                               |



|     |                                    |      |                                                          |     |           |        |       |                                                                                                                                                                                                                                                                                                                                                                                                                                                        |
|-----|------------------------------------|------|----------------------------------------------------------|-----|-----------|--------|-------|--------------------------------------------------------------------------------------------------------------------------------------------------------------------------------------------------------------------------------------------------------------------------------------------------------------------------------------------------------------------------------------------------------------------------------------------------------|
| 882 | 255068_length_467_cvg_49.0_tip_1_5 | 328  | projectin short variant                                  | 155 | 1.08E-44  | 87.10% | 0.32  | IPR003598 (SMART); IPR013098 (PFAM); IPR013783 (G3DSA:2.60.40.GENE3D); PTHR19897:SF155 (PANTHER); PTHR19897 (PANTHER); IPR007110 (PROSITE_PROFILES); SSF48726 (SUPERFAMILY)                                                                                                                                                                                                                                                                            |
| 878 | 254914_length_466_cvg_4.9_tip_1_3  | 28   | ankyrin repeat and socs box protein 3-like isoform x1    | 156 | 2.53E-28  | 56.10% | 0.131 | IPR002110 (PRINTS); IPR002110 (SMART); IPR020683 (G3DSA:1.25.40.GENE3D); IPR020683 (PFAM); PTHR24198 (PANTHER); IPR002110 (PROSITE_PROFILES); IPR002110 (PROSITE_PROFILES); IPR002110 (PROSITE_PROFILES); IPR002110 (PROSITE_PROFILES); IPR020683 (PROSITE_PROFILES); IPR020683 (SUPERFAMILY)                                                                                                                                                          |
| 879 | 254916_length_466_cvg_3.4_tip_1_3  | 23   | cognate 70 kda heat shock partial                        | 156 | 9.15E-101 | 99.10% | 0.134 | IPR013126 (PRINTS); IPR029047 (G3DSA:2.60.34.GENE3D); IPR013126 (PFAM); PTHR19375:SF142 (PANTHER); PTHR19375 (PANTHER); IPR029047 (SUPERFAMILY)                                                                                                                                                                                                                                                                                                        |
| 880 | 255002_length_467_cvg_3.0_tip_1_0  | 14   | multicopper oxidase- isoform a                           | 156 | 1.59E-65  | 76.10% | 0.116 | IPR008972 (G3DSA:2.60.40.GENE3D); IPR011707 (PFAM); PTHR11709:SF33 (PANTHER); PTHR11709 (PANTHER); IPR008972 (SUPERFAMILY)                                                                                                                                                                                                                                                                                                                             |
| 881 | 255040_length_467_cvg_2.5_tip_1_1  | 21   | calcium calmodulin-dependent serine protein kinase       | 156 | 9.61E-16  | 66.50% | 0.116 | IPR014775 (PFAM); IPR004172 (PROSITE_PROFILES); SSF101288 (SUPERFAMILY)                                                                                                                                                                                                                                                                                                                                                                                |
| 883 | 255154_length_468_cvg_5.7_tip_1_1  | 36   | tissue factor pathway inhibitor 2 precursor              | 156 | 3.47E-13  | 64.80% | 0.126 | IPR002223 (PRINTS); IPR002223 (SMART); IPR008037 (PFAM); IPR002223 (PFAM); IPR002223 (G3DSA:4.10.410.GENE3D); PTHR10083 (PANTHER); IPR020901 (PROSITE_PATTERNS); TRANSMEMBRANE (PHOBIUS); NON_CYTOPLASMIC_DOMAIN (PHOBIUS); CYTOPLASMIC_DOMAIN (PHOBIUS); IPR020862 (PROSITE_PROFILES); IPR002223 (PROSITE_PROFILES); IPR008037 (SUPERFAMILY); IPR002223 (SUPERFAMILY); TMhelix (TMHMM)                                                                |
| 884 | 255184_length_468_cvg_2.0_tip_1_4  | 9    | low-density lipoprotein receptor-related protein partial | 156 | 1.02E-28  | 55.60% | 0.121 | IPR000033 (SMART); IPR011042 (G3DSA:2.120.10.GENE3D); IPR000033 (PFAM); PTHR10529 (PANTHER); IPR000033 (PROSITE_PROFILES); IPR000033 (PROSITE_PROFILES); SSF63825 (SUPERFAMILY)                                                                                                                                                                                                                                                                        |
| 885 | 255306_length_468_cvg_2.6_tip_1_3  | 24   | zinc finger protein 311                                  | 156 | 8.16E-28  | 58.80% | 0.11  | IPR015880 (SMART); PF13465 (PFAM); IPR013087 (G3DSA:3.30.160.GENE3D); IPR013087 (G3DSA:3.30.160.GENE3D); PTHR24409:SF14 (PANTHER); PTHR24409 (PANTHER); IPR007087 (PROSITE_PATTERNS); IPR007087 (PROSITE_PATTERNS); IPR007087 (PROSITE_PATTERNS); IPR007087 (PROSITE_PATTERNS); IPR007087 (PROSITE_PROFILES); IPR007087 (PROSITE_PROFILES); IPR007087 (PROSITE_PROFILES); IPR007087 (PROSITE_PROFILES); SSF57667 (SUPERFAMILY); SSF57667 (SUPERFAMILY) |
| 886 | 255310_length_468_cvg_3.2_tip_1_2  | 17   | calcium calmodulin-dependent protein kinase              | 156 | 2.68E-24  | 90.40% | 0.12  | IPR027417 (G3DSA:3.40.50.GENE3D); PTHR23122:SF7 (PANTHER); PTHR23122 (PANTHER); TRANSMEMBRANE (PHOBIUS); NON_CYTOPLASMIC_DOMAIN (PHOBIUS); CYTOPLASMIC_DOMAIN (PHOBIUS); TRANSMEMBRANE (PHOBIUS); CYTOPLASMIC_DOMAIN (PHOBIUS); IPR027417 (SUPERFAMILY); TMhelix (TMHMM); TMhelix (TMHMM)                                                                                                                                                              |
| 887 | 255322_length_468_cvg_71.7_tip_1_5 | 1907 | epididymal secretory protein e1                          | 156 | 7.58E-12  | 56.70% | 0.112 | IPR003172 (PFAM); IPR003172 (G3DSA:2.60.40.GENE3D); PTHR11306 (PANTHER); IPR014756 (SUPERFAMILY)                                                                                                                                                                                                                                                                                                                                                       |
| 888 | 255450_length_469_cvg_12.0_tip_1_2 | 58   | hemagglutinin                                            | 156 | 2.26E-44  | 68.60% | 0.103 | G3DSA:1.10.390.10 (GENE3D); IPR001570 (PFAM); SSF55486 (SUPERFAMILY)                                                                                                                                                                                                                                                                                                                                                                                   |
| 890 | 255652_length_470_cvg_2.1_tip_1_5  | 13   | hypothetical protein LOTGIDRAFT_122202, partial          | 156 | 9.18E-08  | 56.75% | 0.105 | IPR013182 (PFAM)                                                                                                                                                                                                                                                                                                                                                                                                                                       |
| 889 | 255652_length_470_cvg_2.1_tip_1_3  | 13   | dna-directed rna polymerase                              | 157 | 6.62E-14  | 66.80% | 0.1   | no IPS match                                                                                                                                                                                                                                                                                                                                                                                                                                           |
| 891 | 255752_length_471_cvg_3.0_tip_1_0  | 17   | collagen alpha-1 chain                                   | 157 | 1.05E-30  | 65.10% | 0.106 | IPR008160 (PFAM); PTHR24023 (PANTHER); PTHR24023:SF379 (PANTHER)                                                                                                                                                                                                                                                                                                                                                                                       |
| 892 | 255752_length_471_cvg_3.0_tip_1_4  | 17   | threonine-rich gpi-anchored partial                      | 157 | 7.93E-24  | 46.80% | 0.107 | PTHR24023:SF405 (PANTHER); PTHR24023 (PANTHER)                                                                                                                                                                                                                                                                                                                                                                                                         |
| 893 | 255788_length_471_cvg_25.5_tip_1_0 | 127  | type iv secretion protein                                | 157 | 3.77E-16  | 45.50% | 0.235 | SIGNAL_PEPTIDE (PHOBIUS); SIGNAL_PEPTIDE_C_REGION (PHOBIUS); TRANSMEMBRANE (PHOBIUS); SIGNAL_PEPTIDE_H_REGION (PHOBIUS); CYTOPLASMIC_DOMAIN (PHOBIUS); NON_CYTOPLASMIC_DOMAIN (PHOBIUS); SIGNAL_PEPTIDE_N_REGION (PHOBIUS); SignalP-TM (SIGNALP_GRAM_POSITIVE)                                                                                                                                                                                         |
| 894 | 255862_length_472_cvg_4.0_tip_1_1  | 22   | upf0764 protein c16orf89 homolog                         | 157 | 3.45E-11  | 51.30% | 0.108 | no IPS match                                                                                                                                                                                                                                                                                                                                                                                                                                           |
| 895 | 255908_length_472_cvg_3.0_tip_1_4  | 16   | plexin partial                                           | 157 | 1.30E-92  | 94.80% | 0.1   | Coil (COILS); IPR013548 (PFAM); PTHR22625 (PANTHER); PTHR22625:SF16 (PANTHER)                                                                                                                                                                                                                                                                                                                                                                          |
| 896 | 255934_length_472_cvg_2.0_tip_1_4  | 10   | dnak protein                                             | 157 | 2.60E-83  | 91.20% | 0.117 | IPR013126 (PRINTS); G3DSA:3.30.420.40 (GENE3D); G3DSA:3.30.420.40 (GENE3D); IPR013126 (PFAM); G3DSA:3.90.640.10 (GENE3D); PTHR19375:SF142 (PANTHER); PTHR19375 (PANTHER); IPR018181 (PROSITE_PATTERNS); SSF53067 (SUPERFAMILY); SSF53067 (SUPERFAMILY)                                                                                                                                                                                                 |

|     |                                   |    |                                                             |     |          |        |       |                                                                                                                                                                                                                                                                                                                                                                                                                                                                                                                                                                                                                                               |
|-----|-----------------------------------|----|-------------------------------------------------------------|-----|----------|--------|-------|-----------------------------------------------------------------------------------------------------------------------------------------------------------------------------------------------------------------------------------------------------------------------------------------------------------------------------------------------------------------------------------------------------------------------------------------------------------------------------------------------------------------------------------------------------------------------------------------------------------------------------------------------|
| 897 | 255982_length_472_cvg_2.0_tip_1_1 | 11 | zinc finger protein 558                                     | 157 | 9.54E-18 | 62.10% | 0.102 | IPR015880 (SMART); IPR013087 (G3DSA:3.30.160.GENE3D); IPR007087 (PFAM); IPR013087 (G3DSA:3.30.160.GENE3D); IPR013087 (G3DSA:3.30.160.GENE3D); PF13465 (PFAM); PTHR24409:SF14 (PANTHER); PTHR24409 (PANTHER); IPR007087 (PROSITE_PATTERNS); IPR007087 (PROSITE_PATTERNS); IPR007087 (PROSITE_PATTERNS); IPR007087 (PROSITE_PROFILES); IPR007087 (PROSITE_PROFILES); IPR007087 (PROSITE_PROFILES); SSF57667 (SUPERFAMILY); SSF57667 (SUPERFAMILY)                                                                                                                                                                                               |
| 898 | 256082_length_473_cvg_2.9_tip_1_0 | 24 | iron zinc purple acid phosphatase-like isoform x1           | 158 | 3.69E-76 | 81.40% | 0.117 | IPR029052 (G3DSA:3.60.21.GENE3D); IPR004843 (PFAM); IPR015914 (G3DSA:2.60.40.GENE3D); PTHR22953:SF9 (PANTHER); PTHR22953 (PANTHER); IPR008963 (SUPERFAMILY); IPR029052 (SUPERFAMILY)                                                                                                                                                                                                                                                                                                                                                                                                                                                          |
| 899 | 256254_length_474_cvg_2.0_tip_1_1 | 15 | heat shock partial                                          | 158 | 1.07E-66 | 82.30% | 0.104 | Coil (COILS); Coil (COILS); IPR001623 (PRINTS); IPR001623 (SMART); IPR001623 (G3DSA:1.10.287.GENE3D); IPR001623 (PFAM); PTHR24078 (PANTHER); PTHR24078:SF125 (PANTHER); IPR018253 (PROSITE_PATTERNS); NON_CYTOPLASMIC_DOMAIN (PHOBIUS); TRANSMEMBRANE (PHOBIUS); CYTOPLASMIC_DOMAIN (PHOBIUS); IPR001623 (PROSITE_PROFILES); IPR001623 (SUPERFAMILY); TMhelix (TMHMM)                                                                                                                                                                                                                                                                         |
| 900 | 256320_length_474_cvg_3.0_tip_1_3 | 18 | serine beta-lactamase-like protein mitochondrial isoform x2 | 158 | 1.08E-53 | 75.00% | 0.12  | Coil (COILS); IPR012338 (G3DSA:3.40.710.GENE3D); IPR001466 (PFAM); PTHR22935:SF64 (PANTHER); PTHR22935 (PANTHER); IPR012338 (SUPERFAMILY)                                                                                                                                                                                                                                                                                                                                                                                                                                                                                                     |
| 902 | 256498_length_475_cvg_3.4_tip_1_5 | 16 | zinc finger protein                                         | 158 | 1.23E-25 | 55.50% | 0.099 | IPR015880 (SMART); PF13465 (PFAM); IPR007087 (PFAM); IPR013087 (G3DSA:3.30.160.GENE3D); PF13894 (PFAM); IPR013087 (G3DSA:3.30.160.GENE3D); PTHR24409 (PANTHER); PTHR24409:SF14 (PANTHER); IPR007087 (PROSITE_PATTERNS); IPR007087 (PROSITE_PATTERNS); IPR007087 (PROSITE_PATTERNS); IPR007087 (PROSITE_PROFILES); IPR007087 (PROSITE_PROFILES); IPR007087 (PROSITE_PROFILES); IPR007087 (PROSITE_PROFILES); IPR007087 (PROSITE_PROFILES); SSF57667 (SUPERFAMILY); SSF57667 (SUPERFAMILY); SSF57667 (SUPERFAMILY)                                                                                                                              |
| 901 | 256356_length_475_cvg_4.0_tip_1_3 | 21 | alpha- partial                                              | 159 | 5.46E-39 | 65.90% | 0.117 | IPR001599 (PFAM); PTHR11412:SF80 (PANTHER); PTHR11412 (PANTHER); IPR014756 (SUPERFAMILY)                                                                                                                                                                                                                                                                                                                                                                                                                                                                                                                                                      |
| 904 | 257126_length_479_cvg_2.0_tip_1_2 | 12 | ccr4-not transcription complex subunit 6-like isoform x7    | 159 | 6.27E-62 | 80.90% | 0.121 | IPR003591 (SMART); IPR025875 (PFAM); G3DSA:3.80.10.10 (GENE3D); PTHR12121:SF35 (PANTHER); PTHR12121 (PANTHER); IPR001611 (PROSITE_PROFILES); IPR001611 (PROSITE_PROFILES); IPR001611 (PROSITE_PROFILES); SSF52058 (SUPERFAMILY)                                                                                                                                                                                                                                                                                                                                                                                                               |
| 903 | 257014_length_478_cvg_4.0_tip_1_0 | 24 | zinc finger protein 64 isoform x2                           | 160 | 3.08E-59 | 77.80% | 0.101 | IPR015880 (SMART); IPR013087 (G3DSA:3.30.160.GENE3D); IPR013087 (G3DSA:3.30.160.GENE3D); PF13465 (PFAM); IPR013087 (G3DSA:3.30.160.GENE3D); PTHR24409 (PANTHER); IPR007087 (PROSITE_PATTERNS); IPR007087 (PROSITE_PROFILES); IPR007087 (PROSITE_PROFILES); IPR007087 (PROSITE_PROFILES); IPR007087 (PROSITE_PROFILES); SSF57667 (SUPERFAMILY); SSF57667 (SUPERFAMILY)                                                                                                                                                                                                                                                                         |
| 905 | 257166_length_479_cvg_4.0_tip_1_0 | 22 | dehydrogenase reductase sdr family member 11                | 160 | 7.92E-59 | 77.30% | 0.191 | IPR002347 (PRINTS); IPR002198 (PFAM); IPR016040 (G3DSA:3.40.50.GENE3D); PTHR24322 (PANTHER); PTHR24322:SF310 (PANTHER); SSF51735 (SUPERFAMILY)                                                                                                                                                                                                                                                                                                                                                                                                                                                                                                |
| 906 | 257470_length_481_cvg_4.6_tip_1_2 | 24 | allatostatin precursor protein                              | 160 | 4.96E-25 | 57.70% | 0.099 | IPR010276 (PFAM)                                                                                                                                                                                                                                                                                                                                                                                                                                                                                                                                                                                                                              |
| 908 | 257508_length_482_cvg_6.9_tip_1_2 | 40 | zinc finger protein 502                                     | 160 | 4.14E-37 | 60.00% | 0.1   | IPR015880 (SMART); IPR013087 (G3DSA:3.30.160.GENE3D); PF13912 (PFAM); IPR013087 (G3DSA:3.30.160.GENE3D); PF13465 (PFAM); IPR007087 (PFAM); IPR013087 (G3DSA:3.30.160.GENE3D); PTHR24409:SF13 (PANTHER); PTHR24409 (PANTHER); IPR007087 (PROSITE_PATTERNS); IPR007087 (PROSITE_PATTERNS); IPR007087 (PROSITE_PATTERNS); IPR007087 (PROSITE_PROFILES); SSF57667 (SUPERFAMILY); SSF57667 (SUPERFAMILY); SSF57667 (SUPERFAMILY) |
| 909 | 257518_length_482_cvg_3.0_tip_1_5 | 18 | tyrosine-protein phosphatase non-receptor                   | 160 | 1.88E-43 | 69.90% | 0.19  | IPR000242 (PRINTS); IPR003595 (SMART); IPR000242 (PFAM); IPR029021 (G3DSA:3.90.190.GENE3D); PTHR19134 (PANTHER); IPR016130 (PROSITE_PATTERNS); IPR000242 (PROSITE_PROFILES); IPR000387 (PROSITE_PROFILES); IPR029021 (SUPERFAMILY)                                                                                                                                                                                                                                                                                                                                                                                                            |
| 907 | 257490_length_482_cvg_2.0_tip_1_3 | 11 | macrophage mannose receptor 1-like isoform 2                | 161 | 5.55E-25 | 51.90% | 0.119 | IPR001304 (SMART); IPR016186 (G3DSA:3.10.100.GENE3D); IPR001304 (PFAM); PTHR22803 (PANTHER); PTHR22803:SF16 (PANTHER); IPR001304 (PROSITE_PROFILES); IPR016187 (SUPERFAMILY)                                                                                                                                                                                                                                                                                                                                                                                                                                                                  |
| 910 | 257626_length_483_cvg_2.7_tip_1_5 | 14 | alpha-mannosidase 2x                                        | 161 | 6.04E-47 | 75.20% | 0.102 | IPR027291 (G3DSA:3.20.110.GENE3D); IPR000602 (PFAM); PTHR11607:SF4 (PANTHER); PTHR11607 (PANTHER); IPR011330 (SUPERFAMILY)                                                                                                                                                                                                                                                                                                                                                                                                                                                                                                                    |

|     |                                    |     |                                                                                   |     |           |         |         |                                                                                                                                                                                                                                                                                                                                                                                                                                                    |
|-----|------------------------------------|-----|-----------------------------------------------------------------------------------|-----|-----------|---------|---------|----------------------------------------------------------------------------------------------------------------------------------------------------------------------------------------------------------------------------------------------------------------------------------------------------------------------------------------------------------------------------------------------------------------------------------------------------|
| 911 | 258184_length_486_cvg_3.4_tip_1_0  | 27  | low-density lipoprotein receptor-related protein 1b-like                          | 162 | 5.66E-09  | 74.10%  | 0.102   | IPR002172 (PRINTS); IPR002172 (SMART); IPR002172 (G3DSA:4.10.400.GENE3D); IPR002172 (PFAM); IPR023415 (PROSITE_PATTERNS); IPR002172 (PROSITE_PROFILES); IPR002172 (SUPERFAMILY)                                                                                                                                                                                                                                                                    |
| 912 | 258288_length_487_cvg_3.0_tip_1_2  | 16  | ankyrin repeat and sam domain-containing protein 6-like                           | 162 | 7.07E-35  | 62.20%  | 0.609 Y | IPR002110 (PRINTS); IPR002110 (SMART); IPR020683 (PFAM); IPR020683 (G3DSA:1.25.40.GENE3D); IPR002110 (PFAM); PTHR10627 (PANTHER); PTHR10627:SF2 (PANTHER); IPR020683 (PROSITE_PROFILES); IPR002110 (PROSITE_PROFILES); IPR002110 (PROSITE_PROFILES); IPR002110 (PROSITE_PROFILES); SignalP-noTM (SIGNALP_EUK); IPR020683 (SUPERFAMILY)                                                                                                             |
| 913 | 258484_length_488_cvg_2.0_tip_1_2  | 8   | zinc finger protein                                                               | 162 | 6.95E-26  | 55.80%  | 0.1     | IPR015880 (SMART); IPR013087 (G3DSA:3.30.160.GENE3D); IPR013087 (G3DSA:3.30.160.GENE3D); IPR007087 (PFAM); PTHR24409 (PANTHER); PTHR24409:SF14 (PANTHER); IPR007087 (PROSITE_PATTERNS); IPR007087 (PROSITE_PATTERNS); IPR007087 (PROSITE_PATTERNS); IPR007087 (PROSITE_PATTERNS); IPR007087 (PROSITE_PROFILES); IPR007087 (PROSITE_PROFILES); IPR007087 (PROSITE_PROFILES); SSF57667 (SUPERFAMILY); SSF57667 (SUPERFAMILY); SSF57667 (SUPERFAMILY) |
| 914 | 258486_length_488_cvg_4.0_tip_1_5  | 23  | low quality protein: basement membrane-specific heparan sulfate proteoglycan core | 162 | 4.03E-57  | 72.10%  | 0.096   | IPR018031 (SMART); IPR000034 (PFAM); PTHR10574 (PANTHER); PTHR10574:SF252 (PANTHER); IPR000034 (PROSITE_PROFILES)                                                                                                                                                                                                                                                                                                                                  |
| 915 | 258490_length_488_cvg_57.0_tip_1_3 | 973 | protein                                                                           | 163 | 2.00E-23  | 72.60%  | 0.115   | IPR002181 (SMART); IPR014715 (G3DSA:4.10.530.GENE3D); IPR002181 (PFAM); PTHR19143 (PANTHER); IPR020837 (PROSITE_PATTERNS); IPR002181 (PROSITE_PROFILES); IPR002181 (SUPERFAMILY)                                                                                                                                                                                                                                                                   |
| 916 | 258510_length_488_cvg_4.0_tip_1_0  | 28  | sucrase- intestinal-like                                                          | 163 | 8.87E-31  | 57.10%  | 0.104   | IPR000322 (PFAM); PTHR22762 (PANTHER); PTHR22762:SF7 (PANTHER); IPR017853 (SUPERFAMILY)                                                                                                                                                                                                                                                                                                                                                            |
| 917 | 258606_length_489_cvg_2.6_tip_1_1  | 12  | sialate o-acetylerase-like                                                        | 163 | 1.66E-15  | 57.10%  | 0.192   | PTHR22901 (PANTHER); CYTOPLASMIC_DOMAIN (PHOBIUS); NON_CYTOPLASMIC_DOMAIN (PHOBIUS); TRANSMEMBRANE (PHOBIUS); TMhelix (TMHMM); TMhelix (TMHMM)                                                                                                                                                                                                                                                                                                     |
| 918 | 258638_length_489_cvg_2.5_tip_1_3  | 16  | endo-b- -glucanase                                                                | 163 | 6.88E-56  | 76.80%  | 0.232   | IPR012341 (G3DSA:1.50.10.GENE3D); IPR001701 (PFAM); PTHR22298 (PANTHER); PTHR22298:SF17 (PANTHER); IPR018221 (PROSITE_PATTERNS); IPR008928 (SUPERFAMILY)                                                                                                                                                                                                                                                                                           |
| 919 | 258676_length_490_cvg_42.0_tip_1_5 | 188 | cell wall anchor partial                                                          | 163 | 3.37E-17  | 40.00%  | 0.244   | SSF141571 (SUPERFAMILY)                                                                                                                                                                                                                                                                                                                                                                                                                            |
| 921 | 258788_length_491_cvg_2.7_tip_1_2  | 19  | integrin-linked protein kinase                                                    | 163 | 2.05E-50  | 90.40%  | 0.148   | IPR001245 (PFAM); G3DSA:1.10.510.10 (GENE3D); PTHR23257:SF30 (PANTHER); PTHR23257 (PANTHER); IPR000719 (PROSITE_PROFILES); IPR011009 (SUPERFAMILY)                                                                                                                                                                                                                                                                                                 |
| 920 | 258772_length_490_cvg_12.2_tip_1_0 | 64  | anti-lipopolysaccharide partial                                                   | 164 | 4.44E-20  | 68.30%  | 0.11    | IPR024509 (PFAM); IPR024716 (PRODOM)                                                                                                                                                                                                                                                                                                                                                                                                               |
| 922 | 259082_length_493_cvg_3.0_tip_1_5  | 22  | 5 -nucleotidase-like                                                              | 164 | 9.80E-45  | 62.70%  | 0.112   | IPR006179 (PRINTS); IPR008334 (PFAM); IPR008334 (G3DSA:3.90.780.GENE3D); IPR006179 (PANTHER); PTHR11575:SF21 (PANTHER); IPR008334 (SUPERFAMILY)                                                                                                                                                                                                                                                                                                    |
| 924 | 259344_length_494_cvg_3.0_tip_1_5  | 18  | lachesin                                                                          | 164 | 4.48E-76  | 81.40%  | 0.129   | IPR003599 (SMART); PF13895 (PFAM); IPR013783 (G3DSA:2.60.40.GENE3D); IPR013098 (PFAM); IPR013783 (G3DSA:2.60.40.GENE3D); PTHR19831 (PANTHER); PTHR19831:SF43 (PANTHER); IPR007110 (PROSITE_PROFILES); IPR007110 (PROSITE_PROFILES); SSF48726 (SUPERFAMILY); SSF48726 (SUPERFAMILY)                                                                                                                                                                 |
| 923 | 259312_length_494_cvg_63.0_tip_1_3 | 605 | polyubiquitin-b isoform x1                                                        | 165 | 3.14E-111 | 100.00% | 0.102   | IPR019956 (PRINTS); IPR000626 (SMART); G3DSA:3.10.20.90 (GENE3D); G3DSA:3.10.20.90 (GENE3D); IPR000626 (PFAM); PTHR10666 (PANTHER); IPR019954 (PROSITE_PATTERNS); IPR019954 (PROSITE_PATTERNS); IPR000626 (PROSITE_PROFILES); IPR000626 (PROSITE_PROFILES); IPR000626 (PROSITE_PROFILES); IPR029071 (SUPERFAMILY); IPR029071 (SUPERFAMILY)                                                                                                         |
| 925 | 259428_length_495_cvg_46.7_tip_1_3 | 320 | low affinity immunoglobulin epsilon fc receptor                                   | 165 | 6.18E-19  | 51.60%  | 0.113   | IPR001304 (SMART); IPR001304 (PFAM); IPR016186 (G3DSA:3.10.100.GENE3D); PTHR22802 (PANTHER); IPR018378 (PROSITE_PATTERNS); IPR001304 (PROSITE_PROFILES); IPR016187 (SUPERFAMILY)                                                                                                                                                                                                                                                                   |
| 927 | 259944_length_499_cvg_2.0_tip_1_4  | 13  | xanthine dehydrogenase                                                            | 166 | 5.33E-45  | 64.80%  | 0.101   | IPR016167 (G3DSA:3.30.43.GENE3D); IPR002888 (G3DSA:1.10.150.GENE3D); IPR002346 (PFAM); IPR002888 (PFAM); PTHR11908:SF32 (PANTHER); PTHR11908 (PANTHER); IPR016166 (SUPERFAMILY); IPR002888 (SUPERFAMILY)                                                                                                                                                                                                                                           |

|     |                                    |    |                                                                          |     |          |        |         |                                                                                                                                                                                                                                                                                                                                                                                                                                                                                                                                                |
|-----|------------------------------------|----|--------------------------------------------------------------------------|-----|----------|--------|---------|------------------------------------------------------------------------------------------------------------------------------------------------------------------------------------------------------------------------------------------------------------------------------------------------------------------------------------------------------------------------------------------------------------------------------------------------------------------------------------------------------------------------------------------------|
| 926 | 259912_length_499_cvg_5.4_tip_1_3  | 24 | zinc finger protein                                                      | 167 | 2.16E-30 | 56.30% | 0.105   | IPR015880 (SMART); PF13894 (PFAM); IPR013087 (G3DSA:3.30.160.GENE3D); IPR007087 (PFAM); IPR013087 (G3DSA:3.30.160.GENE3D); PF13465 (PFAM); PTHR24409 (PANTHER); PTHR24409:SF14 (PANTHER); IPR007087 (PROSITE_PATTERNS); IPR007087 (PROSITE_PATTERNS); IPR007087 (PROSITE_PATTERNS); IPR007087 (PROSITE_PATTERNS); IPR007087 (PROSITE_PROFILES); IPR007087 (PROSITE_PROFILES); IPR007087 (PROSITE_PROFILES); IPR007087 (PROSITE_PROFILES); IPR007087 (PROSITE_PROFILES); SSF57667 (SUPERFAMILY); SSF57667 (SUPERFAMILY); SSF57667 (SUPERFAMILY) |
| 928 | 260112_length_500_cvg_3.9_tip_1_1  | 23 | acid sphingomyelinase-like phosphodiesterase 3b                          | 167 | 1.13E-37 | 61.90% | 0.218   | IPR029052 (G3DSA:3.60.21.GENE3D); IPR004843 (PFAM); PTHR10340 (PANTHER); PTHR10340:SF14 (PANTHER); TRANSMEMBRANE (PHOBIUS); NON_CYTOPLASMIC_DOMAIN (PHOBIUS); CYTOPLASMIC_DOMAIN (PHOBIUS); IPR029052 (SUPERFAMILY)                                                                                                                                                                                                                                                                                                                            |
| 929 | 260114_length_500_cvg_5.6_tip_1_1  | 26 | low-density lipoprotein receptor-related protein 2                       | 167 | 8.33E-67 | 79.00% | 0.102   | IPR002172 (PRINTS); IPR002172 (SMART); IPR002172 (G3DSA:4.10.400.GENE3D); G3DSA:4.10.1220.10 (GENE3D); IPR002172 (PFAM); IPR002172 (G3DSA:4.10.400.GENE3D); PTHR10529 (PANTHER); IPR023415 (PROSITE_PATTERNS); IPR023415 (PROSITE_PATTERNS); IPR023415 (PROSITE_PATTERNS); IPR002172 (PROSITE_PROFILES); IPR002172 (PROSITE_PROFILES); IPR002172 (PROSITE_PROFILES); IPR002172 (SUPERFAMILY); IPR002172 (SUPERFAMILY); IPR002172 (SUPERFAMILY)                                                                                                 |
| 930 | 260158_length_500_cvg_2.6_tip_1_3  | 20 | clotting factor partial                                                  | 167 | 7.42E-31 | 63.70% | 0.136   | IPR001254 (SMART); G3DSA:2.40.10.10 (GENE3D); IPR001254 (PFAM); PTHR24265 (PANTHER); IPR001254 (PROSITE_PROFILES); IPR009003 (SUPERFAMILY)                                                                                                                                                                                                                                                                                                                                                                                                     |
| 931 | 260210_length_501_cvg_2.0_tip_1_2  | 13 | tyrosine-protein kinase abl                                              | 167 | 4.41E-55 | 71.00% | 0.133   | G3DSA:1.10.510.10 (GENE3D); IPR001245 (PFAM); PTHR24418 (PANTHER); PTHR24418:SF87 (PANTHER); IPR011009 (SUPERFAMILY)                                                                                                                                                                                                                                                                                                                                                                                                                           |
| 932 | 260252_length_501_cvg_5.4_tip_1_2  | 29 | multiple epidermal growth factor-like domains partial                    | 167 | 3.34E-61 | 69.00% | 0.119   | PR00011 (PRINTS); IPR000742 (SMART); G3DSA:2.170.300.10 (GENE3D); IPR002049 (PFAM); PTHR24035 (PANTHER); PTHR24035:SF4 (PANTHER); IPR013032 (PROSITE_PATTERNS); IPR013032 (PROSITE_PATTERNS); IPR013032 (PROSITE_PATTERNS); IPR011489 (PROSITE_PROFILES); IPR000742 (PROSITE_PROFILES); IPR000742 (PROSITE_PROFILES); IPR000742 (PROSITE_PROFILES)                                                                                                                                                                                             |
| 933 | 260262_length_501_cvg_2.9_tip_1_5  | 19 | ankyrin repeat protein partial                                           | 167 | 3.37E-23 | 54.60% | 0.16    | IPR002110 (SMART); IPR020683 (PFAM); IPR002110 (PFAM); IPR020683 (G3DSA:1.25.40.GENE3D); PTHR24198 (PANTHER); IPR002110 (PROSITE_PROFILES); IPR002110 (PROSITE_PROFILES); IPR002110 (PROSITE_PROFILES); IPR002110 (PROSITE_PROFILES); IPR002110 (PROSITE_PROFILES); IPR020683 (PROSITE_PROFILES); IPR020683 (SUPERFAMILY)                                                                                                                                                                                                                      |
| 934 | 260440_length_502_cvg_2.0_tip_1_4  | 17 | ga-binding protein subunit beta-2                                        | 167 | 4.11E-68 | 81.90% | 0.148   | IPR002110 (PRINTS); IPR002110 (SMART); IPR020683 (PFAM); IPR020683 (G3DSA:1.25.40.GENE3D); IPR020683 (G3DSA:1.25.40.GENE3D); IPR002110 (PFAM); PTHR24193 (PANTHER); PTHR24193:SF72 (PANTHER); IPR002110 (PROSITE_PROFILES); IPR002110 (PROSITE_PROFILES); IPR020683 (PROSITE_PROFILES); IPR002110 (PROSITE_PROFILES); IPR020683 (SUPERFAMILY)                                                                                                                                                                                                  |
| 935 | 260520_length_503_cvg_3.0_tip_1_5  | 15 | leucine-rich repeat protein soc-2 homolog                                | 167 | 8.95E-98 | 93.70% | 0.111   | IPR003591 (SMART); IPR001611 (PFAM); G3DSA:3.80.10.10 (GENE3D); IPR001611 (PFAM); PTHR23155 (PANTHER); IPR027036 (PTHR23155:PANTHER); IPR001611 (PROSITE_PROFILES); IPR001611 (PROSITE_PROFILES); IPR001611 (PROSITE_PROFILES); IPR001611 (PROSITE_PROFILES); SSF52058 (SUPERFAMILY)                                                                                                                                                                                                                                                           |
| 936 | 260748_length_505_cvg_4.0_tip_1_1  | 23 | pancreatic triacylglycerol lipase                                        | 168 | 1.89E-24 | 58.90% | 0.585 Y | IPR029058 (G3DSA:3.40.50.GENE3D); IPR013818 (PFAM); IPR000734 (PANTHER); NON_CYTOPLASMIC_DOMAIN (PHOBIUS); SIGNAL_PEPTIDE (PHOBIUS); SIGNAL_PEPTIDE_N_REGION (PHOBIUS); SIGNAL_PEPTIDE_C_REGION (PHOBIUS); SIGNAL_PEPTIDE_H_REGION (PHOBIUS); SignalP-noTM (SIGNALP_EUK); IPR029058 (SUPERFAMILY)                                                                                                                                                                                                                                              |
| 937 | 260948_length_506_cvg_6.0_tip_1_1  | 34 | von willebrand factor type egf and pentraxin domain-containing protein 1 | 169 | 3.33E-10 | 42.70% | 0.101   | IPR000436 (SMART); G3DSA:2.10.70.10 (GENE3D); G3DSA:2.10.70.10 (GENE3D); IPR000436 (PFAM); PTHR19325 (PANTHER); IPR000436 (PROSITE_PROFILES); IPR000436 (PROSITE_PROFILES); IPR000436 (SUPERFAMILY); IPR000436 (SUPERFAMILY)                                                                                                                                                                                                                                                                                                                   |
| 942 | 261358_length_509_cvg_10.0_tip_1_2 | 43 | low quality protein: tenascin                                            | 169 | 1.04E-25 | 65.00% | 0.106   | IPR002181 (SMART); IPR014715 (G3DSA:4.10.530.GENE3D); IPR014716 (G3DSA:3.90.215.GENE3D); IPR002181 (PFAM); PTHR19143 (PANTHER); IPR020837 (PROSITE_PATTERNS); IPR002181 (PROSITE_PROFILES); IPR002181 (SUPERFAMILY)                                                                                                                                                                                                                                                                                                                            |
| 938 | 261150_length_508_cvg_3.5_tip_1_3  | 18 | ---NA---                                                                 | 170 |          |        | 0.122   | IPR001073 (PRINTS); IPR001073 (PFAM); IPR008983 (G3DSA:2.60.120.GENE3D); IPR001073 (PROSITE_PROFILES); IPR008983 (SUPERFAMILY); IPR008983 (SUPERFAMILY)                                                                                                                                                                                                                                                                                                                                                                                        |

|     |                                    |      |                                                           |     |          |        |         |                                                                                                                                                                                                                                                                                                                                                                                                                                                      |
|-----|------------------------------------|------|-----------------------------------------------------------|-----|----------|--------|---------|------------------------------------------------------------------------------------------------------------------------------------------------------------------------------------------------------------------------------------------------------------------------------------------------------------------------------------------------------------------------------------------------------------------------------------------------------|
| 939 | 261190_length_508_cvg_3.7_tip_1_0  | 22   | rac protein kinase drac-                                  | 170 | 3.02E-93 | 87.60% | 0.366 Y | IPR000961 (SMART); G3DSA:1.10.510.10 (GENE3D); IPR000719 (PFAM); IPR017892 (PFAM); PTHR24351 (PANTHER); PTHR24351:SF64 (PANTHER); IPR000719 (PROSITE_PROFILES); IPR000961 (PROSITE_PROFILES); IPR011009 (SUPERFAMILY)                                                                                                                                                                                                                                |
| 940 | 261192_length_508_cvg_6.0_tip_1_0  | 31   | mannosyl-oligosaccharide -alpha-mannosidase ib            | 170 | 4.08E-94 | 89.00% | 0.2     | IPR001382 (PRINTS); IPR001382 (G3DSA:1.50.10.GENE3D); IPR001382 (PFAM); IPR001382 (PANTHER); PTHR11742:SF37 (PANTHER); IPR001382 (SUPERFAMILY)                                                                                                                                                                                                                                                                                                       |
| 941 | 261272_length_509_cvg_4.0_tip_1_0  | 23   | von willebrand factor a domain-containing protein partial | 170 | 1.50E-28 | 55.60% | 0.103   | PTHR21610:SF9 (PANTHER); PTHR21610 (PANTHER)                                                                                                                                                                                                                                                                                                                                                                                                         |
| 943 | 261400_length_509_cvg_2.8_tip_1_4  | 13   | u4 u6 small nuclear ribonucleoprotein prp4                | 170 | 4.56E-76 | 88.50% | 0.238   | IPR020472 (PRINTS); IPR001680 (SMART); IPR015943 (G3DSA:2.130.10.GENE3D); IPR001680 (PFAM); IPR027106 (PANTHER); IPR019775 (PROSITE_PATTERNS); IPR001680 (PROSITE_PROFILES); IPR001680 (PROSITE_PROFILES); IPR017986 (PROSITE_PROFILES); IPR001680 (PROSITE_PROFILES); IPR017986 (SUPERFAMILY)                                                                                                                                                       |
| 944 | 261410_length_509_cvg_6.0_tip_1_1  | 33   | phospholipase b-like partial                              | 170 | 1.65E-76 | 77.70% | 0.136   | IPR007000 (PFAM); IPR007000 (PANTHER); PTHR12370:SF3 (PANTHER)                                                                                                                                                                                                                                                                                                                                                                                       |
| 945 | 261436_length_510_cvg_4.3_tip_1_3  | 39   | parkinson disease 7 domain-containing                     | 170 | 2.24E-73 | 72.70% | 0.256   | IPR002818 (PFAM); IPR029062 (G3DSA:3.40.50.GENE3D); IPR029062 (SUPERFAMILY)                                                                                                                                                                                                                                                                                                                                                                          |
| 946 | 261456_length_510_cvg_2.9_tip_1_5  | 16   | vitellogenin receptor                                     | 170 | 7.09E-18 | 47.90% | 0.127   | IPR002172 (PRINTS); IPR002172 (SMART); IPR002172 (G3DSA:4.10.400.GENE3D); IPR002172 (PFAM); IPR002172 (G3DSA:4.10.400.GENE3D); IPR002172 (G3DSA:4.10.400.GENE3D); PTHR10529 (PANTHER); IPR023415 (PROSITE_PATTERNS); IPR023415 (PROSITE_PATTERNS); IPR023415 (PROSITE_PATTERNS); IPR002172 (PROSITE_PROFILES); IPR002172 (PROSITE_PROFILES); IPR002172 (PROSITE_PROFILES); IPR002172 (SUPERFAMILY); IPR002172 (SUPERFAMILY); IPR002172 (SUPERFAMILY) |
| 948 | 261652_length_511_cvg_2.0_tip_1_2  | 16   | peptidyl-prolyl cis-trans isomerase-like 4                | 170 | 1.62E-77 | 80.80% | 0.103   | IPR002130 (PRINTS); IPR002130 (PFAM); IPR029000 (G3DSA:2.40.100.GENE3D); PTHR11071:SF156 (PANTHER); IPR024936 (PANTHER); IPR002130 (PROSITE_PROFILES); IPR029000 (SUPERFAMILY)                                                                                                                                                                                                                                                                       |
| 950 | 261702_length_511_cvg_4.0_tip_1_5  | 27   | low quality protein: cubilin- partial                     | 170 | 3.50E-43 | 58.80% | 0.231   | IPR000859 (SMART); IPR000859 (PFAM); IPR000859 (G3DSA:2.60.120.GENE3D); PTHR10127 (PANTHER); IPR000859 (PROSITE_PROFILES); IPR000859 (PROSITE_PROFILES); IPR000859 (SUPERFAMILY); IPR000859 (SUPERFAMILY)                                                                                                                                                                                                                                            |
| 951 | 261730_length_512_cvg_4.0_tip_1_5  | 22   | arylsulfatase b                                           | 170 | 2.16E-35 | 57.30% | 0.102   | IPR017849 (G3DSA:3.40.720.GENE3D); IPR000917 (PFAM); G3DSA:3.30.1120.10 (GENE3D); PTHR10342:SF206 (PANTHER); PTHR10342 (PANTHER); IPR017850 (SUPERFAMILY)                                                                                                                                                                                                                                                                                            |
| 952 | 261800_length_512_cvg_86.0_tip_1_2 | 4982 | cathepsin l2                                              | 170 | 1.19E-77 | 80.90% | 0.103   | IPR000668 (SMART); G3DSA:3.90.70.10 (GENE3D); IPR000668 (PFAM); IPR013128 (PANTHER); PTHR12411:SF265 (PANTHER); IPR025661 (PROSITE_PATTERNS); IPR025660 (PROSITE_PATTERNS); SSF54001 (SUPERFAMILY)                                                                                                                                                                                                                                                   |
| 947 | 261570_length_511_cvg_12.8_tip_1_0 | 71   | signal cub and egf-like domain-containing protein 2       | 171 | 4.56E-09 | 50.70% | 0.113   | IPR000742 (SMART); IPR001881 (SMART); G3DSA:2.10.25.10 (GENE3D); IPR024731 (PFAM); IPR013032 (PROSITE_PATTERNS); IPR000152 (PROSITE_PATTERNS); IPR013032 (PROSITE_PATTERNS); IPR000742 (PROSITE_PROFILES); SSF57196 (SUPERFAMILY); IPR009030 (SUPERFAMILY)                                                                                                                                                                                           |
| 949 | 261688_length_511_cvg_9.0_tip_1_0  | 45   | zinc finger protein 233                                   | 171 | 3.06E-32 | 57.00% | 0.113   | IPR015880 (SMART); IPR013087 (G3DSA:3.30.160.GENE3D); PF13465 (PFAM); IPR013087 (G3DSA:3.30.160.GENE3D); PTHR24409:SF13 (PANTHER); PTHR24409 (PANTHER); IPR007087 (PROSITE_PATTERNS); IPR007087 (PROSITE_PATTERNS); IPR007087 (PROSITE_PROFILES); IPR007087 (PROSITE_PROFILES); IPR007087 (PROSITE_PROFILES); IPR007087 (PROSITE_PROFILES); SSF57667 (SUPERFAMILY); SSF57667 (SUPERFAMILY); SSF57667 (SUPERFAMILY)                                   |
| 953 | 261878_length_513_cvg_6.2_tip_1_2  | 39   | cubilin isoform x2                                        | 171 | 1.78E-31 | 56.70% | 0.107   | IPR000859 (SMART); IPR000859 (PFAM); IPR000859 (G3DSA:2.60.120.GENE3D); PTHR10127 (PANTHER); IPR000859 (PROSITE_PROFILES); IPR000859 (SUPERFAMILY)                                                                                                                                                                                                                                                                                                   |
| 954 | 261944_length_513_cvg_3.0_tip_1_2  | 15   | aael017480- partial                                       | 171 | 2.77E-27 | 56.10% | 0.145   | IPR002110 (PRINTS); IPR002110 (SMART); IPR020683 (PFAM); IPR020683 (G3DSA:1.25.40.GENE3D); IPR002110 (PFAM); PTHR24198 (PANTHER); IPR002110 (PROSITE_PROFILES); IPR002110 (PROSITE_PROFILES); IPR002110 (PROSITE_PROFILES); IPR002110 (PROSITE_PROFILES); IPR020683 (PROSITE_PROFILES); IPR020683 (SUPERFAMILY)                                                                                                                                      |
| 955 | 262022_length_514_cvg_6.1_tip_1_3  | 37   | wd repeat-containing protein 61                           | 172 | 1.22E-89 | 90.80% | 0.109   | IPR020472 (PRINTS); IPR001680 (SMART); IPR015943 (G3DSA:2.130.10.GENE3D); IPR001680 (PFAM); PTHR22841 (PANTHER); IPR001680 (PROSITE_PROFILES); IPR001680 (PROSITE_PROFILES); IPR001680 (PROSITE_PROFILES); IPR017986 (PROSITE_PROFILES); IPR001680 (PROSITE_PROFILES); IPR017986 (SUPERFAMILY)                                                                                                                                                       |
| 956 | 262080_length_514_cvg_38.0_tip_1_0 | 165  | low-density lipoprotein receptor-related protein partial  | 172 | 3.72E-07 | 64.50% | 0.12    | IPR002172 (SMART); IPR002172 (PFAM); IPR002172 (G3DSA:4.10.400.GENE3D); IPR023415 (PROSITE_PATTERNS); IPR002172 (PROSITE_PROFILES); IPR002172 (SUPERFAMILY)                                                                                                                                                                                                                                                                                          |



|     |                                    |     |                                                                                  |     |          |        |         |                                                                                                                                                                                                                                                                                                                                                                                                                                                                                                                                                                                                                                                                                                                                                                          |
|-----|------------------------------------|-----|----------------------------------------------------------------------------------|-----|----------|--------|---------|--------------------------------------------------------------------------------------------------------------------------------------------------------------------------------------------------------------------------------------------------------------------------------------------------------------------------------------------------------------------------------------------------------------------------------------------------------------------------------------------------------------------------------------------------------------------------------------------------------------------------------------------------------------------------------------------------------------------------------------------------------------------------|
| 957 | 262116_length_515_cvg_4.6_tip_1_0  | 26  | von willebrand factor a domain-containing protein 8                              | 172 | 2.37E-20 | 58.40% | 0.114   | PTHR21610 (PANTHER); PTHR21610:SF9 (PANTHER)<br>IPR002001 (PRINTS); IPR000832 (PRINTS); IPR000832 (PFAM);<br>G3DSA:1.20.1070.10 (GENE3D); PTHR12011 (PANTHER); PTHR12011:SF249 (PANTHER); NON_CYTOPLASMIC_DOMAIN (PHOBIUS); TRANSMEMBRANE (PHOBIUS); CYTOPLASMIC_DOMAIN (PHOBIUS); CYTOPLASMIC_DOMAIN (PHOBIUS); NON_CYTOPLASMIC_DOMAIN (PHOBIUS); TRANSMEMBRANE (PHOBIUS); TRANSMEMBRANE (PHOBIUS); IPR017981 (PROSITE_PROFILES); SSF81321 (SUPERFAMILY); TMhelix (TMHMM); TMhelix (TMHMM); TMhelix (TMHMM)                                                                                                                                                                                                                                                             |
| 958 | 262156_length_515_cvg_3.2_tip_1_0  | 25  | diuretic hormone receptor-like isoform x1                                        | 172 | 3.76E-65 | 77.10% | 0.141   | G3DSA:1.10.390.10 (GENE3D); IPR001570 (PFAM); SSF55486 (SUPERFAMILY)<br>IPR003172 (SMART); IPR003172 (PFAM); IPR003172 (G3DSA:2.60.40.GENE3D); PTHR11306 (PANTHER); PTHR11306:SF4 (PANTHER); SIGNAL_PEPTIDE (PHOBIUS); SIGNAL_PEPTIDE_C_REGION (PHOBIUS); SIGNAL_PEPTIDE_H_REGION (PHOBIUS); NON_CYTOPLASMIC_DOMAIN (PHOBIUS); SIGNAL_PEPTIDE_N_REGION (PHOBIUS); SignalP-noTM (SIGNALP_GRAM_NEGATIVE); SignalP-noTM (SIGNALP_EUK); SignalP-TM (SIGNALP_GRAM_POSITIVE); IPR014756 (SUPERFAMILY); TMhelix (TMHMM)<br>IPR002110 (SMART); IPR020683 (PFAM); IPR020683 (G3DSA:1.25.40.GENE3D); IPR001164 (PFAM); PTHR23180 (PANTHER); PTHR23180:SF229 (PANTHER); IPR020683 (PROSITE_PROFILES); IPR002110 (PROSITE_PROFILES); SSF57863 (SUPERFAMILY); IPR020683 (SUPERFAMILY) |
| 959 | 262328_length_516_cvg_33.6_tip_1_2 | 192 | hemagglutinin                                                                    | 172 | 8.87E-44 | 70.80% | 0.098   | IPR019565 (PFAM); IPR008930 (G3DSA:1.50.10.GENE3D); PTHR11412 (PANTHER); IPR019742 (PROSITE_PATTERNS); IPR008930 (SUPERFAMILY)                                                                                                                                                                                                                                                                                                                                                                                                                                                                                                                                                                                                                                           |
| 960 | 262426_length_517_cvg_15.7_tip_1_0 | 93  | md-2-related lipid-recognition                                                   | 173 | 2.45E-24 | 53.50% | 0.785 Y | IPR001863 (PFAM); IPR001863 (PANTHER)                                                                                                                                                                                                                                                                                                                                                                                                                                                                                                                                                                                                                                                                                                                                    |
| 961 | 262740_length_519_cvg_2.9_tip_1_5  | 17  | centaurin-gamma 1a                                                               | 173 | 2.02E-74 | 72.10% | 0.164   | PTHR21610 (PANTHER); PTHR21610:SF9 (PANTHER)                                                                                                                                                                                                                                                                                                                                                                                                                                                                                                                                                                                                                                                                                                                             |
| 962 | 262746_length_519_cvg_7.0_tip_1_5  | 46  | alpha-2-macroglobulin-like protein 1                                             | 173 | 1.37E-53 | 71.10% | 0.105   | IPR013548 (PFAM); PTHR22625 (PANTHER); IPR008936 (SUPERFAMILY)                                                                                                                                                                                                                                                                                                                                                                                                                                                                                                                                                                                                                                                                                                           |
| 963 | 262750_length_519_cvg_3.9_tip_1_0  | 29  | glypican-5 isoform x5                                                            | 173 | 1.06E-33 | 57.10% | 0.192   | IPR002110 (PRINTS); IPR002110 (SMART); IPR002110 (PFAM); IPR020683 (G3DSA:1.25.40.GENE3D); IPR020683 (PFAM); PTHR24144 (PANTHER); IPR002110 (PROSITE_PROFILES); IPR002110 (PROSITE_PROFILES); IPR020683 (PROSITE_PROFILES); IPR002110 (PROSITE_PROFILES); IPR020683 (SUPERFAMILY)                                                                                                                                                                                                                                                                                                                                                                                                                                                                                        |
| 964 | 262808_length_520_cvg_6.0_tip_1_2  | 34  | von willebrand factor a domain-containing protein 8-like                         | 173 | 3.31E-85 | 85.80% | 0.125   | IPR002110 (PRINTS); IPR002110 (SMART); IPR002110 (PFAM); IPR020683 (G3DSA:1.25.40.GENE3D); IPR020683 (PFAM); PTHR24144 (PANTHER); IPR002110 (PROSITE_PROFILES); IPR002110 (PROSITE_PROFILES); IPR020683 (PROSITE_PROFILES); IPR002110 (PROSITE_PROFILES); IPR020683 (SUPERFAMILY)                                                                                                                                                                                                                                                                                                                                                                                                                                                                                        |
| 965 | 262902_length_520_cvg_3.0_tip_1_4  | 18  | plexin- partial                                                                  | 173 | 7.77E-99 | 93.70% | 0.144   | IPR002110 (PRINTS); IPR002110 (SMART); IPR002110 (PFAM); IPR020683 (G3DSA:1.25.40.GENE3D); IPR020683 (PFAM); PTHR24144 (PANTHER); IPR002110 (PROSITE_PROFILES); IPR002110 (PROSITE_PROFILES); IPR020683 (PROSITE_PROFILES); IPR002110 (PROSITE_PROFILES); IPR020683 (SUPERFAMILY)                                                                                                                                                                                                                                                                                                                                                                                                                                                                                        |
| 966 | 263080_length_522_cvg_6.0_tip_1_2  | 34  | ankyrin repeat domain-containing protein 49-like                                 | 174 | 1.41E-56 | 71.10% | 0.134   | IPR020472 (PRINTS); IPR001680 (SMART); IPR015943 (G3DSA:2.130.10.GENE3D); IPR001680 (PFAM); PTHR22844 (PANTHER); PTHR22844:SF166 (PANTHER); IPR001680 (PROSITE_PROFILES); IPR017986 (PROSITE_PROFILES); IPR001680 (PROSITE_PROFILES); IPR017986 (SUPERFAMILY)                                                                                                                                                                                                                                                                                                                                                                                                                                                                                                            |
| 967 | 263084_length_522_cvg_14.0_tip_1_0 | 83  | wd repeat-containing protein 86-like                                             | 174 | 4.95E-43 | 72.50% | 0.16    | IPR001128 (PRINTS); IPR002401 (PRINTS); IPR001128 (PFAM); IPR001128 (G3DSA:1.10.630.GENE3D); PTHR24291 (PANTHER); IPR017972 (PROSITE_PATTERNS); IPR001128 (SUPERFAMILY)                                                                                                                                                                                                                                                                                                                                                                                                                                                                                                                                                                                                  |
| 968 | 263164_length_522_cvg_8.9_tip_1_5  | 50  | cytochrome p450 partial                                                          | 174 | 4.43E-52 | 66.60% | 0.1     | Coil (COILS); IPR000582 (PRINTS); IPR029045 (G3DSA:3.90.226.GENE3D); IPR000582 (PFAM); IPR014352 (G3DSA:1.20.80.GENE3D); IPR001753 (PFAM); PTHR23310 (PANTHER); PTHR23310:SF55 (PANTHER); IPR022408 (PROSITE_PATTERNS); IPR000582 (PROSITE_PROFILES); IPR029045 (SUPERFAMILY); IPR000582 (SUPERFAMILY)                                                                                                                                                                                                                                                                                                                                                                                                                                                                   |
| 969 | 263188_length_522_cvg_3.2_tip_1_5  | 24  | enoyl- delta isomerase mitochondrial                                             | 174 | 6.37E-45 | 67.20% | 0.179   | IPR016163 (G3DSA:3.40.309.GENE3D); IPR015590 (PFAM); PTHR11699 (PANTHER); PTHR11699:SF114 (PANTHER); IPR016161 (SUPERFAMILY)                                                                                                                                                                                                                                                                                                                                                                                                                                                                                                                                                                                                                                             |
| 971 | 263214_length_523_cvg_5.2_tip_1_4  | 39  | betaine aldehyde dehydrogenase                                                   | 174 | 6.74E-36 | 80.20% | 0.128   | IPR002172 (PRINTS); IPR002172 (SMART); IPR002172 (G3DSA:4.10.400.GENE3D); IPR002172 (G3DSA:4.10.400.GENE3D); IPR002172 (PFAM); PTHR10529 (PANTHER); IPR023415 (PROSITE_PATTERNS); IPR023415 (PROSITE_PATTERNS); IPR023415 (PROSITE_PATTERNS); IPR023415 (PROSITE_PATTERNS); CYTOPLASMIC_DOMAIN (PHOBIUS); TRANSMEMBRANE (PHOBIUS); NON_CYTOPLASMIC_DOMAIN (PHOBIUS); IPR002172 (PROSITE_PROFILES); IPR002172 (PROSITE_PROFILES); IPR002172 (PROSITE_PROFILES); IPR002172 (SUPERFAMILY); IPR002172 (SUPERFAMILY); IPR002172 (SUPERFAMILY); TMhelix (TMHMM)                                                                                                                                                                                                                |
| 972 | 263216_length_523_cvg_3.0_tip_1_4  | 16  | low quality protein: low-density lipoprotein receptor-related protein 1- partial | 174 | 3.22E-23 | 56.10% | 0.354 Y | IPR011496 (PFAM); PTHR13170 (PANTHER); PTHR13170:SF17 (PANTHER); IPR017853 (SUPERFAMILY)                                                                                                                                                                                                                                                                                                                                                                                                                                                                                                                                                                                                                                                                                 |
| 970 | 263212_length_523_cvg_2.0_tip_1_3  | 14  | bifunctional protein ncoat isoform x2                                            | 175 | 1.03E-81 | 92.20% | 0.201   | PF14704 (PFAM); IPR026645 (PANTHER); TRANSMEMBRANE (PHOBIUS); CYTOPLASMIC_DOMAIN (PHOBIUS); NON_CYTOPLASMIC_DOMAIN (PHOBIUS); TMhelix (TMHMM)                                                                                                                                                                                                                                                                                                                                                                                                                                                                                                                                                                                                                            |
| 973 | 263374_length_524_cvg_42.1_tip_1_3 | 228 | hemagglutinin amebocyte aggregation factor-like                                  | 175 | 1.37E-23 | 57.40% | 0.194   |                                                                                                                                                                                                                                                                                                                                                                                                                                                                                                                                                                                                                                                                                                                                                                          |

|     |                                    |      |                                                                                        |     |           |        |         |                                                                                                                                                                                                                                                                                                                                                                                                                                                                      |
|-----|------------------------------------|------|----------------------------------------------------------------------------------------|-----|-----------|--------|---------|----------------------------------------------------------------------------------------------------------------------------------------------------------------------------------------------------------------------------------------------------------------------------------------------------------------------------------------------------------------------------------------------------------------------------------------------------------------------|
| 974 | 263484_length_524_cvg_2.1_tip_1_1  | 20   | adenosine deaminase cecr1-like                                                         | 175 | 1.07E-34  | 63.50% | 0.367 Y | IPR013659 (PFAM); PTHR11409:SF39 (PANTHER); PTHR11409 (PANTHER); NON_CYTOPLASMIC_DOMAIN (PHOBIUS); SIGNAL_PEPTIDE_C_REGION (PHOBIUS); SIGNAL_PEPTIDE_H_REGION (PHOBIUS); SIGNAL_PEPTIDE (PHOBIUS); SIGNAL_PEPTIDE_N_REGION (PHOBIUS); SSF51556 (SUPERFAMILY); TMhelix (TMHMM)                                                                                                                                                                                        |
| 975 | 263584_length_525_cvg_2.8_tip_1_0  | 23   | map kinase-activated protein kinase 2                                                  | 175 | 2.39E-102 | 88.90% | 0.113   | IPR002290 (SMART); G3DSA:1.10.510.10 (GENE3D); G3DSA:3.30.200.20 (GENE3D); IPR000719 (PFAM); PTHR24349:SF64 (PANTHER); PTHR24349 (PANTHER); IPR008271 (PROSITE_PATTERNS); IPR017441 (PROSITE_PATTERNS); IPR000719 (PROSITE_PROFILES); IPR011009 (SUPERFAMILY)                                                                                                                                                                                                        |
| 976 | 263706_length_526_cvg_5.6_tip_1_1  | 41   | protein disulfide-isomerase a4-like                                                    | 175 | 1.03E-57  | 67.40% | 0.916 Y | PR00421 (PRINTS); IPR013766 (PFAM); IPR005788 (TIGRFAM); IPR012336 (G3DSA:3.40.30.GENE3D); PTHR18929:SF56 (PANTHER); PTHR18929 (PANTHER); IPR017937 (PROSITE_PATTERNS); SIGNAL_PEPTIDE_H_REGION (PHOBIUS); SIGNAL_PEPTIDE (PHOBIUS); SIGNAL_PEPTIDE_N_REGION (PHOBIUS); SIGNAL_PEPTIDE_C_REGION (PHOBIUS); NON_CYTOPLASMIC_DOMAIN (PHOBIUS); IPR012336 (PROSITE_PROFILES); SignalP-noTM (SIGNALP_EUK); SignalP-noTM (SIGNALP_GRAM_NEGATIVE); IPR012336 (SUPERFAMILY) |
| 977 | 263732_length_526_cvg_54.5_tip_1_0 | 1385 | ubiquitin-60s ribosomal protein I40                                                    | 176 | 1.59E-85  | 99.20% | 0.16    | IPR019956 (PRINTS); IPR000626 (SMART); G3DSA:3.10.20.90 (GENE3D); IPR000626 (PFAM); IPR001975 (PFAM); PTHR10666 (PANTHER); IPR019954 (PROSITE_PATTERNS); IPR000626 (PROSITE_PROFILES); IPR029071 (SUPERFAMILY); IPR011332 (SUPERFAMILY)                                                                                                                                                                                                                              |
| 978 | 263748_length_527_cvg_3.8_tip_1_1  | 22   | low quality protein: reelin-like                                                       | 176 | 2.57E-29  | 54.50% | 0.219   | PTHR11841 (PANTHER)                                                                                                                                                                                                                                                                                                                                                                                                                                                  |
| 979 | 263918_length_528_cvg_5.4_tip_1_3  | 33   | ga-binding protein subunit beta-2                                                      | 176 | 2.51E-10  | 68.30% | 0.117   | IPR002110 (SMART); IPR020683 (PFAM); IPR020683 (G3DSA:1.25.40.GENE3D); PTHR24182 (PANTHER); IPR020683 (PROSITE_PROFILES); IPR002110 (PROSITE_PROFILES); IPR020683 (SUPERFAMILY)                                                                                                                                                                                                                                                                                      |
| 984 | 264200_length_530_cvg_19.5_tip_1_5 | 141  | hypothetical protein                                                                   | 176 | 7.03E-13  | 50.40% | 0.383 Y | CYTOPLASMIC_DOMAIN (PHOBIUS); TRANSMEMBRANE (PHOBIUS); NON_CYTOPLASMIC_DOMAIN (PHOBIUS); TMhelix (TMHMM)                                                                                                                                                                                                                                                                                                                                                             |
| 980 | 264012_length_529_cvg_15.4_tip_1_0 | 79   | lysosomal alpha-mannosidase-like                                                       | 177 | 7.20E-31  | 67.60% | 0.137   | IPR011682 (PFAM); G3DSA:2.60.40.1360 (GENE3D); PTHR11607:SF3 (PANTHER); PTHR11607 (PANTHER); IPR011013 (SUPERFAMILY)                                                                                                                                                                                                                                                                                                                                                 |
| 981 | 264042_length_529_cvg_22.6_tip_1_0 | 166  | bone sialoprotein-binding partial                                                      | 177 | 1.76E-08  | 49.00% | 0.106   | no IPS match                                                                                                                                                                                                                                                                                                                                                                                                                                                         |
| 982 | 264096_length_529_cvg_2.9_tip_1_3  | 16   | achain crystal structure of engineered northeast structural genomics consortium target | 177 | 1.12E-11  | 64.60% | 0.123   | IPR002110 (SMART); IPR020683 (G3DSA:1.25.40.GENE3D); IPR020683 (PFAM); PTHR24182 (PANTHER); IPR020683 (PROSITE_PROFILES); IPR002110 (PROSITE_PROFILES); IPR002110 (PROSITE_PROFILES); IPR020683 (SUPERFAMILY)                                                                                                                                                                                                                                                        |
| 983 | 264134_length_530_cvg_2.0_tip_1_0  | 18   | beta-glucuronidase isoform x2                                                          | 177 | 1.00E-74  | 75.60% | 0.127   | IPR006101 (PRINTS); IPR006103 (PFAM); IPR013781 (G3DSA:3.20.20.GENE3D); PTHR10066:SF51 (PANTHER); PTHR10066 (PANTHER); IPR023230 (PROSITE_PATTERNS); IPR023232 (PROSITE_PATTERNS); IPR017853 (SUPERFAMILY)                                                                                                                                                                                                                                                           |
| 985 | 264300_length_531_cvg_6.1_tip_1_1  | 39   | sortilin-related receptor                                                              | 177 | 1.73E-10  | 41.60% | 0.1     | IPR002172 (PRINTS); IPR002172 (SMART); IPR002172 (PFAM); IPR002172 (G3DSA:4.10.400.GENE3D); PTHR10529 (PANTHER); IPR023415 (PROSITE_PATTERNS); IPR023415 (PROSITE_PATTERNS); IPR002172 (PROSITE_PROFILES); IPR002172 (PROSITE_PROFILES); IPR002172 (SUPERFAMILY); IPR002172 (SUPERFAMILY)                                                                                                                                                                            |
| 986 | 264324_length_531_cvg_3.9_tip_1_0  | 30   | zinc finger protein                                                                    | 177 | 4.77E-18  | 55.90% | 0.103   | IPR015880 (SMART); PF13465 (PFAM); IPR013087 (G3DSA:3.30.160.GENE3D); IPR003656 (PFAM); IPR013087 (G3DSA:3.30.160.GENE3D); PTHR24409:SF14 (PANTHER); PTHR24409 (PANTHER); IPR007087 (PROSITE_PATTERNS); IPR007087 (PROSITE_PATTERNS); IPR007087 (PROSITE_PATTERNS); IPR007087 (PROSITE_PROFILES); IPR007087 (PROSITE_PROFILES); IPR007087 (PROSITE_PROFILES); SSF57667 (SUPERFAMILY); SSF57667 (SUPERFAMILY)                                                         |
| 987 | 264366_length_532_cvg_3.0_tip_1_1  | 21   | short neuropeptide f                                                                   | 177 | 1.51E-22  | 68.60% | 0.211   | no IPS match                                                                                                                                                                                                                                                                                                                                                                                                                                                         |
| 990 | 264526_length_533_cvg_3.9_tip_1_5  | 25   | integrin alpha-ps2-like                                                                | 177 | 1.62E-39  | 61.30% | 0.141   | IPR000413 (PRINTS); IPR013519 (SMART); G3DSA:2.130.10.130 (GENE3D); IPR013517 (PFAM); PTHR23220 (PANTHER); IPR013519 (PROSITE_PROFILES); IPR013519 (PROSITE_PROFILES); SSF69318 (SUPERFAMILY)                                                                                                                                                                                                                                                                        |
| 988 | 264492_length_533_cvg_32.3_tip_0_4 | 206  | neurotransmitter gated ion channel                                                     | 178 | 4.54E-53  | 66.30% | 0.139   | IPR006202 (PFAM); IPR006202 (G3DSA:2.70.170.GENE3D); IPR027361 (G3DSA:1.20.120.GENE3D); PTHR18945:SF490 (PANTHER); IPR006201 (PANTHER); CYTOPLASMIC_DOMAIN (PHOBIUS); TRANSMEMBRANE (PHOBIUS); NON_CYTOPLASMIC_DOMAIN (PHOBIUS); IPR006202 (SUPERFAMILY); IPR006029 (SUPERFAMILY); TMhelix (TMHMM)                                                                                                                                                                   |

|      |                                    |     |                                                                                 |     |          |        |         |                                                                                                                                                                                                                                                                                                                                                                                                                                                                                                                       |
|------|------------------------------------|-----|---------------------------------------------------------------------------------|-----|----------|--------|---------|-----------------------------------------------------------------------------------------------------------------------------------------------------------------------------------------------------------------------------------------------------------------------------------------------------------------------------------------------------------------------------------------------------------------------------------------------------------------------------------------------------------------------|
| 989  | 264508_length_533_cvg_3.7_tip_1_1  | 22  | serine threonine-protein phosphatase 6 regulatory ankyrin repeat subunit c-like | 178 | 9.02E-28 | 54.70% | 0.136   | IPR002110 (PRINTS); IPR002110 (SMART); IPR020683 (PFAM); IPR020683 (G3DSA:1.25.40.GENE3D); PTHR24198 (PANTHER); IPR002110 (PROSITE_PROFILES); IPR020683 (PROSITE_PROFILES); IPR002110 (PROSITE_PROFILES); IPR002110 (PROSITE_PROFILES); IPR002110 (PROSITE_PROFILES); IPR020683 (SUPERFAMILY)                                                                                                                                                                                                                         |
| 991  | 264620_length_534_cvg_2.1_tip_1_5  | 16  | dentin sialophosphoprotein isoform x1                                           | 178 | 1.32E-59 | 71.20% | 0.107   | IPR015880 (SMART); PF13465 (PFAM); IPR013087 (G3DSA:3.30.160.GENE3D); IPR013087 (G3DSA:3.30.160.GENE3D); IPR013087 (G3DSA:3.30.160.GENE3D); PTHR24409 (PANTHER); IPR007087 (PROSITE_PATTERNS); IPR007087 (PROSITE_PATTERNS); IPR007087 (PROSITE_PATTERNS); IPR007087 (PROSITE_PATTERNS); IPR007087 (PROSITE_PROFILES); IPR007087 (PROSITE_PROFILES); IPR007087 (PROSITE_PROFILES); IPR007087 (PROSITE_PROFILES); IPR007087 (PROSITE_PROFILES); SSF57667 (SUPERFAMILY); SSF57667 (SUPERFAMILY); SSF57667 (SUPERFAMILY) |
| 992  | 264668_length_534_cvg_3.0_tip_1_4  | 18  | aldehyde dehydrogenase                                                          | 178 | 5.94E-66 | 69.00% | 0.183   | IPR016163 (G3DSA:3.40.309.GENE3D); IPR015590 (PFAM); PTHR11699 (PANTHER); IPR015657 (PTHR11699:PANTHER); IPR016161 (SUPERFAMILY); TMhelix (TMHMM)                                                                                                                                                                                                                                                                                                                                                                     |
| 995  | 264776_length_535_cvg_2.7_tip_1_4  | 16  | zinc finger protein 239-like                                                    | 178 | 2.05E-24 | 60.00% | 0.106   | IPR015880 (SMART); PF13465 (PFAM); IPR013087 (G3DSA:3.30.160.GENE3D); IPR013087 (G3DSA:3.30.160.GENE3D); IPR013087 (G3DSA:3.30.160.GENE3D); PF13912 (PFAM); PTHR24409 (PANTHER); IPR007087 (PROSITE_PATTERNS); IPR007087 (PROSITE_PATTERNS); IPR007087 (PROSITE_PROFILES); IPR007087 (PROSITE_PROFILES); IPR007087 (PROSITE_PROFILES); IPR007087 (PROSITE_PROFILES); SSF57667 (SUPERFAMILY); SSF57667 (SUPERFAMILY)                                                                                                   |
| 997  | 264798_length_536_cvg_17.6_tip_1_2 | 105 | membrane glycoprotein lig-                                                      | 178 | 2.46E-23 | 52.60% | 0.106   | IPR003591 (SMART); IPR001611 (PFAM); G3DSA:3.80.10.10 (GENE3D); IPR026906 (PFAM); G3DSA:3.80.10.10 (GENE3D); PTHR24365 (PANTHER); IPR001611 (PROSITE_PROFILES); IPR001611 (PROSITE_PROFILES); IPR001611 (PROSITE_PROFILES); IPR001611 (PROSITE_PROFILES); IPR001611 (PROSITE_PROFILES); SSF52058 (SUPERFAMILY)                                                                                                                                                                                                        |
| 993  | 264700_length_535_cvg_17.3_tip_1_0 | 93  | apolipoprotein d-like                                                           | 179 | 8.20E-34 | 61.20% | 0.363 Y | IPR003057 (PRINTS); IPR012674 (G3DSA:2.40.128.GENE3D); PTHR10612:SF7 (PANTHER); PTHR10612 (PANTHER); TRANSMEMBRANE (PHOBIUS); CYTOPLASMIC_DOMAIN (PHOBIUS); NON_CYTOPLASMIC_DOMAIN (PHOBIUS); IPR011038 (SUPERFAMILY); TMhelix (TMHMM)                                                                                                                                                                                                                                                                                |
| 994  | 264740_length_535_cvg_2.0_tip_1_3  | 15  | caseinolytic peptidase b protein homolog                                        | 179 | 7.79E-53 | 75.70% | 0.099   | IPR002110 (SMART); IPR002110 (PFAM); IPR020683 (G3DSA:1.25.40.GENE3D); IPR020683 (PFAM); PTHR24193 (PANTHER); IPR002110 (PROSITE_PROFILES); IPR002110 (PROSITE_PROFILES); IPR020683 (SUPERFAMILY)                                                                                                                                                                                                                                                                                                                     |
| 996  | 264778_length_535_cvg_11.0_tip_1_0 | 64  | ribosome biogenesis protein wdr12 homolog                                       | 179 | 5.03E-83 | 80.40% | 0.157   | IPR020472 (PRINTS); IPR001680 (SMART); IPR015943 (G3DSA:2.130.10.GENE3D); IPR001680 (PFAM); PTHR19855 (PANTHER); IPR019775 (PROSITE_PATTERNS); IPR001680 (PROSITE_PROFILES); IPR017986 (PROSITE_PROFILES); IPR001680 (PROSITE_PROFILES); IPR001680 (PROSITE_PROFILES); IPR017986 (SUPERFAMILY)                                                                                                                                                                                                                        |
| 998  | 264824_length_536_cvg_5.9_tip_1_4  | 34  | low affinity immunoglobulin epsilon fc receptor-like                            | 179 | 3.28E-17 | 46.40% | 0.132   | IPR001304 (SMART); IPR001304 (PFAM); IPR016186 (G3DSA:3.10.100.GENE3D); PTHR22802 (PANTHER); IPR001304 (PROSITE_PROFILES); IPR016187 (SUPERFAMILY)                                                                                                                                                                                                                                                                                                                                                                    |
| 999  | 265016_length_537_cvg_2.0_tip_1_3  | 15  | chorion peroxidase                                                              | 179 | 2.84E-25 | 67.80% | 0.12    | IPR019791 (PFAM); IPR019791 (G3DSA:1.10.640.GENE3D); PTHR11475 (PANTHER); IPR019791 (PROSITE_PROFILES); IPR010255 (SUPERFAMILY)                                                                                                                                                                                                                                                                                                                                                                                       |
| 1001 | 265202_length_539_cvg_19.7_tip_1_2 | 109 | peptidyl-prolyl cis-trans isomerase b                                           | 179 | 3.66E-43 | 54.60% | 0.109   | IPR024936 (PIRSF); IPR029000 (G3DSA:2.40.100.GENE3D); IPR002130 (PFAM); PTHR11071:SF78 (PANTHER); IPR024936 (PANTHER); IPR002130 (PROSITE_PROFILES); IPR029000 (SUPERFAMILY)                                                                                                                                                                                                                                                                                                                                          |
| 1002 | 265266_length_539_cvg_3.9_tip_1_2  | 26  | aael017046- partial                                                             | 179 | 2.08E-59 | 74.30% | 0.920 Y | IPR021190 (PRINTS); IPR002477 (PFAM); IPR002477 (G3DSA:1.10.101.GENE3D); IPR001818 (PFAM); IPR024079 (G3DSA:3.40.390.GENE3D); PTHR10201:SF131 (PANTHER); PTHR10201 (PANTHER); SIGNAL_PEPTIDE_H_REGION (PHOBIUS); SIGNAL_PEPTIDE_C_REGION (PHOBIUS); NON_CYTOPLASMIC_DOMAIN (PHOBIUS); SIGNAL_PEPTIDE (PHOBIUS); SIGNAL_PEPTIDE_N_REGION (PHOBIUS); SignalP-noTM (SIGNALP_EUK); IPR002477 (SUPERFAMILY); SSF55486 (SUPERFAMILY); TMhelix (TMHMM)                                                                       |
| 1000 | 265166_length_539_cvg_4.6_tip_1_4  | 29  | low quality protein: neurogenic locus notch homolog protein 3-like              | 180 | 8.45E-52 | 65.50% | 0.101   | IPR000742 (SMART); IPR013032 (PFAM); G3DSA:2.10.25.10 (GENE3D)                                                                                                                                                                                                                                                                                                                                                                                                                                                        |
| 1003 | 265272_length_539_cvg_4.0_tip_1_3  | 26  | alcohol dehydrogenase                                                           | 180 | 1.32E-51 | 71.80% | 0.182   | IPR020471 (PRINTS); IPR023210 (PFAM); IPR023210 (G3DSA:3.20.20.GENE3D); IPR001395 (PANTHER); PTHR11732:SF183 (PANTHER); IPR018170 (PROSITE_PATTERNS); IPR023210 (SUPERFAMILY)                                                                                                                                                                                                                                                                                                                                         |
| 1004 | 265302_length_540_cvg_4.2_tip_1_0  | 26  | attractin-like protein 1                                                        | 180 | 3.81E-81 | 79.80% | 0.1     | G3DSA:2.10.25.10 (GENE3D); PTHR10574:SF3 (PANTHER); PTHR10574 (PANTHER)                                                                                                                                                                                                                                                                                                                                                                                                                                               |

|      |                                    |       |                                                               |     |          |        |         |                                                                                                                                                                                                                                                                                                                                                                                                                                                                     |
|------|------------------------------------|-------|---------------------------------------------------------------|-----|----------|--------|---------|---------------------------------------------------------------------------------------------------------------------------------------------------------------------------------------------------------------------------------------------------------------------------------------------------------------------------------------------------------------------------------------------------------------------------------------------------------------------|
| 1005 | 265314_length_540_cvg_73.1_tip_1_4 | 1003  | carboxypeptidase b-like                                       | 180 | 1.69E-64 | 71.80% | 0.118   | IPR000834 (SMART); IPR000834 (PFAM); G3DSA:3.40.630.10 (GENE3D); PTHR11705 (PANTHER); SSF53187 (SUPERFAMILY)                                                                                                                                                                                                                                                                                                                                                        |
| 1006 | 265338_length_540_cvg_2.0_tip_1_3  | 16    | peroxisomal biogenesis factor 7                               | 180 | 2.14E-81 | 76.10% | 0.102   | IPR020472 (PRINTS); IPR001680 (SMART); IPR015943 (G3DSA:2.130.10.GENE3D); IPR001680 (PFAM); PTHR22850 (PANTHER); PTHR22850:SF98 (PANTHER); IPR019775 (PROSITE_PATTERNS); IPR019775 (PROSITE_PATTERNS); IPR001680 (PROSITE_PROFILES); IPR001680 (PROSITE_PROFILES); IPR017986 (PROSITE_PROFILES); IPR001680 (PROSITE_PROFILES); IPR001680 (PROSITE_PROFILES); IPR017986 (SUPERFAMILY)                                                                                |
| 1007 | 265358_length_540_cvg_5.3_tip_1_2  | 40    | alpha-2-macroglobulin-like protein 1                          | 180 | 1.37E-21 | 47.80% | 0.22    | IPR011625 (PFAM); PTHR11412 (PANTHER)                                                                                                                                                                                                                                                                                                                                                                                                                               |
| 1008 | 265556_length_542_cvg_61.6_tip_1_0 | 18917 | vitellogenin 2                                                | 181 | 1.31E-22 | 53.40% | 0.540 Y | IPR015816 (G3DSA:2.30.230.GENE3D); IPR001747 (PFAM); PTHR23345 (PANTHER); TRANSMEMBRANE (PHOBIUS); CYTOPLASMIC_DOMAIN (PHOBIUS); NON_CYTOPLASMIC_DOMAIN (PHOBIUS); SignalP-TM (SIGNALP_EUK); IPR015819 (SUPERFAMILY); TMhelix (TMHMM)                                                                                                                                                                                                                               |
| 1009 | 265608_length_542_cvg_5.3_tip_1_3  | 29    | c4b-binding protein beta                                      | 181 | 6.74E-59 | 66.40% | 0.108   | IPR000436 (SMART); G3DSA:2.10.70.10 (GENE3D); IPR000436 (PFAM); G3DSA:2.10.70.10 (GENE3D); PTHR19325 (PANTHER); PTHR19325:SF312 (PANTHER); IPR000436 (PROSITE_PROFILES); IPR000436 (PROSITE_PROFILES); IPR000436 (SUPERFAMILY); IPR000436 (SUPERFAMILY)                                                                                                                                                                                                             |
| 1010 | 265698_length_543_cvg_3.4_tip_1_5  | 22    | gastrula zinc finger                                          | 181 | 9.02E-23 | 63.50% | 0.097   | IPR015880 (SMART); IPR013087 (G3DSA:3.30.160.GENE3D); PF13465 (PFAM); IPR013087 (G3DSA:3.30.160.GENE3D); IPR013087 (G3DSA:3.30.160.GENE3D); PTHR24409 (PANTHER); IPR007087 (PROSITE_PATTERNS); IPR007087 (PROSITE_PATTERNS); IPR007087 (PROSITE_PROFILES); IPR007087 (PROSITE_PROFILES); IPR007087 (PROSITE_PROFILES); SSF57667 (SUPERFAMILY); SSF57667 (SUPERFAMILY)                                                                                               |
| 1011 | 265786_length_544_cvg_4.0_tip_1_2  | 28    | peroxidasin homolog                                           | 181 | 1.69E-16 | 46.40% | 0.112   | IPR019791 (G3DSA:1.10.640.GENE3D); IPR019791 (G3DSA:1.10.640.GENE3D); IPR019791 (PFAM); PTHR11475 (PANTHER); IPR019791 (PROSITE_PROFILES); IPR010255 (SUPERFAMILY)                                                                                                                                                                                                                                                                                                  |
| 1012 | 265804_length_544_cvg_2.0_tip_1_5  | 13    | von willebrand factor d and egf domain-containing             | 181 | 7.04E-47 | 58.10% | 0.118   | IPR000742 (SMART); IPR000742 (PFAM); G3DSA:2.170.300.10 (GENE3D); IPR013032 (PFAM); PTHR24838 (PANTHER); IPR013032 (PROSITE_PATTERNS); IPR000742 (PROSITE_PROFILES); IPR000742 (PROSITE_PROFILES); IPR000742 (PROSITE_PROFILES); SSF57196 (SUPERFAMILY); SSF57196 (SUPERFAMILY) |
| 1013 | 265840_length_544_cvg_2.2_tip_1_1  | 22    | group xiia secretory phospholipase a2                         | 181 | 1.80E-52 | 63.10% | 0.659 Y | IPR016090 (G3DSA:1.20.90.GENE3D); IPR010711 (PFAM); PTHR12824:SF8 (PANTHER); IPR010711 (PANTHER); IPR013090 (PROSITE_PATTERNS); SIGNAL_PEPTIDE_C_REGION (PHOBIUS); SIGNAL_PEPTIDE_H_REGION (PHOBIUS); SIGNAL_PEPTIDE (PHOBIUS); NON_CYTOPLASMIC_DOMAIN (PHOBIUS); SIGNAL_PEPTIDE_N_REGION (PHOBIUS); SignalP-noTM (SIGNALP_EUK); IPR016090 (SUPERFAMILY); TMhelix (TMHMM)                                                                                           |
| 1014 | 265852_length_544_cvg_2.0_tip_1_1  | 11    | rna polymerase ii largest subunit                             | 181 | 7.19E-47 | 84.90% | 0.097   | PR01217 (PRINTS); IPR000684 (PFAM); IPR000684 (PROSITE_PATTERNS); IPR000684 (PROSITE_PATTERNS)                                                                                                                      |
| 1015 | 265928_length_545_cvg_3.4_tip_1_1  | 25    | dehydrogenase reductase sdr family protein 7-like             | 182 | 8.87E-87 | 84.10% | 0.104   | IPR002347 (PRINTS); IPR016040 (G3DSA:3.40.50.GENE3D); IPR002198 (PFAM); PTHR24322:SF325 (PANTHER); PTHR24322 (PANTHER); IPR020904 (PROSITE_PATTERNS); NON_CYTOPLASMIC_DOMAIN (PHOBIUS); CYTOPLASMIC_DOMAIN (PHOBIUS); TRANSMEMBRANE (PHOBIUS); SSF51735 (SUPERFAMILY)                                                                                                                                                                                               |
| 1016 | 266006_length_546_cvg_11.4_tip_1_3 | 62    | serpin b3                                                     | 182 | 1.86E-29 | 67.10% | 0.123   | G3DSA:2.30.39.10 (GENE3D); IPR023796 (PFAM); G3DSA:3.30.497.10 (GENE3D); IPR000215 (PANTHER); IPR023795 (PROSITE_PATTERNS); IPR023796 (SUPERFAMILY)                                                                                                                                                                                                                                                                                                                 |
| 1017 | 266082_length_546_cvg_3.5_tip_1_1  | 22    | mam and ldl-receptor class a domain-containing protein 1-like | 182 | 4.22E-15 | 48.00% | 0.119   | IPR000998 (SMART); IPR000998 (PFAM); IPR000998 (PROSITE_PROFILES); IPR013320 (SUPERFAMILY)                                                                                                                                                                                                                                                                                                                                                                          |
| 1021 | 266184_length_547_cvg_25.1_tip_1_2 | 88    | gamma-glutamyl hydrolase-like                                 | 182 | 3.57E-24 | 69.70% | 0.203   | IPR011697 (PFAM); IPR029062 (G3DSA:3.40.50.GENE3D); PTHR11315:SF2 (PANTHER); IPR015527 (PANTHER); IPR015527 (PROSITE_PROFILES)                                                                                                                                                                                                                                                                                                                                      |
| 1023 | 266228_length_548_cvg_12.2_tip_1_5 | 57    | hypothetical protein                                          | 182 | 2.31E-08 | 74.17% | 0.117   | IPR010790 (PFAM)                                                                                                                                                                                                                                                                                                                                                                                                                                                    |



|      |                                    |      |                                                         |     |           |        |         |                                                                                                                                                                                                                                                                                                                                                                                                                                                                                                             |
|------|------------------------------------|------|---------------------------------------------------------|-----|-----------|--------|---------|-------------------------------------------------------------------------------------------------------------------------------------------------------------------------------------------------------------------------------------------------------------------------------------------------------------------------------------------------------------------------------------------------------------------------------------------------------------------------------------------------------------|
| 1018 | 266112_length_547_cvg_3.0_tip_1_3  | 22   | isoform b                                               | 183 | 8.95E-31  | 65.60% | 0.518 Y | IPR002347 (PRINTS); IPR002198 (PFAM); IPR016040 (G3DSA:3.40.50.GENE3D); PTHR24320:SF38 (PANTHER); PTHR24320 (PANTHER); SIGNAL_PEPTIDE_N_REGION (PHOBIUS); SIGNAL_PEPTIDE_H_REGION (PHOBIUS); NON_CYTOPLASMIC_DOMAIN (PHOBIUS); SIGNAL_PEPTIDE_C_REGION (PHOBIUS); SIGNAL_PEPTIDE (PHOBIUS); SSF51735 (SUPERFAMILY); TMhelix (TMHMM)                                                                                                                                                                         |
| 1019 | 266146_length_547_cvg_6.3_tip_1_0  | 44   | muscle m-line assembly protein unc-89                   | 183 | 1.80E-47  | 66.90% | 0.103   | IPR003598 (SMART); IPR003599 (SMART); IPR013783 (G3DSA:2.60.40.GENE3D); IPR013783 (G3DSA:2.60.40.GENE3D); IPR013098 (PFAM); PTHR19897 (PANTHER); IPR007110 (PROSITE_PROFILES); IPR007110 (PROSITE_PROFILES); SSF48726 (SUPERFAMILY); SSF48726 (SUPERFAMILY)                                                                                                                                                                                                                                                 |
| 1020 | 266150_length_547_cvg_27.9_tip_1_3 | 174  | translocase of inner mitochondrial membrane 8 homolog b | 183 | 2.05E-33  | 78.30% | 0.124   | IPR004217 (G3DSA:1.10.287.GENE3D); IPR004217 (PFAM); PTHR21535 (PANTHER); PTHR21535:SF25 (PANTHER); CYTOPLASMIC_DOMAIN (PHOBIUS); NON_CYTOPLASMIC_DOMAIN (PHOBIUS); TRANSMEMBRANE (PHOBIUS); IPR004217 (SUPERFAMILY); TMhelix (TMHMM)                                                                                                                                                                                                                                                                       |
| 1022 | 266212_length_547_cvg_3.0_tip_1_3  | 18   | insulin receptor                                        | 183 | 7.00E-102 | 88.00% | 0.103   | IPR001245 (PRINTS); IPR020635 (SMART); IPR001245 (PFAM); G3DSA:1.10.510.10 (GENE3D); G3DSA:3.30.200.20 (GENE3D); PTHR24416:SF254 (PANTHER); PTHR24416 (PANTHER); IPR002011 (PROSITE_PATTERNS); IPR008266 (PROSITE_PATTERNS); IPR000719 (PROSITE_PROFILES); IPR011009 (SUPERFAMILY)                                                                                                                                                                                                                          |
| 1024 | 266258_length_548_cvg_3.0_tip_1_3  | 18   | venom protease-like                                     | 183 | 2.11E-43  | 59.00% | 0.267   | IPR001314 (PRINTS); IPR001254 (SMART); G3DSA:2.40.10.10 (GENE3D); G3DSA:2.40.10.10 (GENE3D); G3DSA:2.40.10.10 (GENE3D); IPR001254 (PFAM); PTHR24268:SF81 (PANTHER); PTHR24268 (PANTHER); IPR018114 (PROSITE_PATTERNS); IPR001254 (PROSITE_PROFILES); IPR009003 (SUPERFAMILY)                                                                                                                                                                                                                                |
| 1025 | 266274_length_548_cvg_2.0_tip_1_4  | 16   | antigen 5 scp domain-containing                         | 183 | 9.84E-12  | 56.50% | 0.311   | IPR014044 (G3DSA:3.40.33.GENE3D); IPR014044 (PFAM); IPR001283 (PANTHER); IPR014044 (SUPERFAMILY)                                                                                                                                                                                                                                                                                                                                                                                                            |
| 1026 | 266284_length_548_cvg_60.0_tip_1_0 | 514  | ---NA---                                                | 183 |           |        | 0.187   | Coil (COILS); IPR014716 (G3DSA:3.90.215.GENE3D); IPR002181 (PFAM); TRANSMEMBRANE (PHOBIUS); CYTOPLASMIC_DOMAIN (PHOBIUS); NON_CYTOPLASMIC_DOMAIN (PHOBIUS); IPR002181 (PROSITE_PROFILES); IPR002181 (SUPERFAMILY); TMhelix (TMHMM)                                                                                                                                                                                                                                                                          |
| 1027 | 266370_length_549_cvg_3.3_tip_1_4  | 20   | third variable lymphocyte receptor                      | 183 | 2.55E-11  | 51.00% | 0.18    | G3DSA:3.80.10.10 (GENE3D); IPR001611 (PFAM); PTHR24365 (PANTHER); SSF52058 (SUPERFAMILY)                                                                                                                                                                                                                                                                                                                                                                                                                    |
| 1028 | 266408_length_549_cvg_4.0_tip_1_4  | 28   | low quality protein: titin-like                         | 183 | 2.83E-47  | 62.10% | 0.101   | IPR013098 (PFAM); IPR013783 (G3DSA:2.60.40.GENE3D); IPR013783 (G3DSA:2.60.40.GENE3D); PTHR19897 (PANTHER); IPR007110 (PROSITE_PROFILES); SSF48726 (SUPERFAMILY); SSF48726 (SUPERFAMILY)                                                                                                                                                                                                                                                                                                                     |
| 1029 | 266458_length_550_cvg_9.6_tip_1_4  | 66   | integrin-linked protein kinase                          | 183 | 5.15E-42  | 91.20% | 0.227   | IPR002110 (SMART); IPR020683 (G3DSA:1.25.40.GENE3D); IPR020683 (PFAM); PTHR23257:SF30 (PANTHER); PTHR23257 (PANTHER); IPR020683 (PROSITE_PROFILES); IPR002110 (PROSITE_PROFILES); IPR020683 (SUPERFAMILY); TMhelix (TMHMM)                                                                                                                                                                                                                                                                                  |
| 1032 | 266642_length_551_cvg_13.8_tip_1_2 | 74   | beta- -n-acetylgalactosaminyltransferase bre-4-like     | 183 | 1.75E-49  | 58.90% | 0.145   | IPR003859 (PRINTS); IPR027791 (PFAM); IPR027995 (PFAM); IPR029044 (G3DSA:3.90.550.GENE3D); IPR003859 (PANTHER); PTHR19300:SF30 (PANTHER); IPR029044 (SUPERFAMILY)                                                                                                                                                                                                                                                                                                                                           |
| 1030 | 266478_length_550_cvg_3.9_tip_1_3  | 23   | transmembrane protease serine 9                         | 184 | 2.84E-16  | 53.20% | 0.106   | IPR002172 (SMART); IPR001254 (PFAM); IPR002172 (G3DSA:4.10.400.GENE3D); IPR002172 (PFAM); G3DSA:2.40.10.10 (GENE3D); PTHR24265 (PANTHER); IPR018114 (PROSITE_PATTERNS); IPR002172 (PROSITE_PROFILES); IPR002172 (SUPERFAMILY); IPR009003 (SUPERFAMILY)                                                                                                                                                                                                                                                      |
| 1031 | 266550_length_551_cvg_3.0_tip_1_3  | 16   | von willebrand factor                                   | 184 | 1.07E-10  | 47.20% | 0.12    | IPR001846 (PFAM); PTHR11339 (PANTHER); CYTOPLASMIC_DOMAIN (PHOBIUS); TRANSMEMBRANE (PHOBIUS); CYTOPLASMIC_DOMAIN (PHOBIUS); NON_CYTOPLASMIC_DOMAIN (PHOBIUS); TRANSMEMBRANE (PHOBIUS); IPR001846 (PROSITE_PROFILES); TMhelix (TMHMM); TMhelix (TMHMM); TMhelix (TMHMM)                                                                                                                                                                                                                                      |
| 1033 | 266666_length_552_cvg_80.8_tip_1_3 | 4434 | glyceraldehyde 3-phosphate dehydrogenase                | 184 | 3.14E-12  | 90.80% | 0.128   | IPR020831 (PANTHER); CYTOPLASMIC_DOMAIN (PHOBIUS); NON_CYTOPLASMIC_DOMAIN (PHOBIUS); TRANSMEMBRANE (PHOBIUS)                                                                                                                                                                                                                                                                                                                                                                                                |
| 1034 | 266750_length_552_cvg_3.2_tip_1_4  | 17   | cytochrome p450 2u1-like                                | 184 | 2.24E-58  | 67.40% | 0.666 Y | IPR001128 (PRINTS); IPR002401 (PRINTS); IPR001128 (PFAM); IPR001128 (G3DSA:1.10.630.GENE3D); PTHR24300 (PANTHER); SignalP-noTM (SIGNALP_EUK); IPR001128 (SUPERFAMILY)                                                                                                                                                                                                                                                                                                                                       |
| 1035 | 266754_length_552_cvg_3.8_tip_1_5  | 28   | fibronectin type 3 and ankyrin repeat domains protein 1 | 184 | 2.95E-42  | 69.50% | 0.455 Y | IPR002110 (PRINTS); IPR002110 (SMART); IPR020683 (PFAM); IPR020683 (G3DSA:1.25.40.GENE3D); IPR002110 (PFAM); PTHR24183:SF1 (PANTHER); PTHR24183 (PANTHER); SIGNAL_PEPTIDE_N_REGION (PHOBIUS); SIGNAL_PEPTIDE_H_REGION (PHOBIUS); SIGNAL_PEPTIDE_C_REGION (PHOBIUS); NON_CYTOPLASMIC_DOMAIN (PHOBIUS); SIGNAL_PEPTIDE (PHOBIUS); IPR020683 (PROSITE_PROFILES); IPR002110 (PROSITE_PROFILES); IPR002110 (PROSITE_PROFILES); IPR002110 (PROSITE_PROFILES); SignalP-noTM (SIGNALP_EUK); IPR020683 (SUPERFAMILY) |



|      |                                    |     |                                                                  |     |          |        |         |                                                                                                                                                                                                                                                                                                                                                                                                                                                                                                                                            |
|------|------------------------------------|-----|------------------------------------------------------------------|-----|----------|--------|---------|--------------------------------------------------------------------------------------------------------------------------------------------------------------------------------------------------------------------------------------------------------------------------------------------------------------------------------------------------------------------------------------------------------------------------------------------------------------------------------------------------------------------------------------------|
| 1036 | 266804_length_553_cvg_17.0_tip_1_3 | 120 | fatty acid binding protein                                       | 185 | 2.55E-54 | 75.10% | 0.157   | IPR000463 (PRINTS); IPR012674 (G3DSA:2.40.128.GENE3D); IPR000566 (PFAM); PTHR11955 (PANTHER); IPR000463 (PROSITE_PATTERNS); IPR011038 (SUPERFAMILY)                                                                                                                                                                                                                                                                                                                                                                                        |
| 1037 | 267028_length_555_cvg_4.0_tip_1_4  | 25  | isoform b                                                        | 185 | 1.17E-11 | 63.20% | 0.116   | IPR001254 (PFAM); G3DSA:2.40.10.10 (GENE3D); PTHR24268 (PANTHER); PTHR24268:SF94 (PANTHER); IPR018114 (PROSITE_PATTERNS); IPR009003 (SUPERFAMILY)                                                                                                                                                                                                                                                                                                                                                                                          |
| 1038 | 267034_length_555_cvg_2.0_tip_1_2  | 13  | deleted in autism protein 1 homolog                              | 185 | 1.74E-34 | 54.40% | 0.114   | IPR022049 (PFAM); PTHR32073 (PANTHER); PTHR32073:SF7 (PANTHER); IPR020519 (PRODOM)                                                                                                                                                                                                                                                                                                                                                                                                                                                         |
| 1039 | 267106_length_556_cvg_2.0_tip_1_2  | 12  | CG4553                                                           | 185 | 2.82E-24 | 61.70% | 0.142   | Coil (COILS); Coil (COILS); IPR010487 (PFAM); PTHR21133 (PANTHER); PTHR21133:SF0 (PANTHER)                                                                                                                                                                                                                                                                                                                                                                                                                                                 |
| 1040 | 267130_length_556_cvg_2.5_tip_1_5  | 14  | #NAME?                                                           | 185 | 3.12E-84 | 79.80% | 0.124   | G3DSA:3.40.50.2000 (GENE3D); IPR023214 (G3DSA:3.40.50.GENE3D); IPR001830 (PFAM); PTHR10788:SF6 (PANTHER); PTHR10788 (PANTHER); SSF53756 (SUPERFAMILY)                                                                                                                                                                                                                                                                                                                                                                                      |
| 1041 | 267146_length_556_cvg_5.0_tip_1_2  | 34  | sco- partial                                                     | 185 | 1.40E-33 | 61.20% | 0.148   | IPR000421 (SMART); IPR000421 (PFAM); IPR008979 (G3DSA:2.60.120.GENE3D); PTHR24543 (PANTHER); IPR000421 (PROSITE_PATTERNS); IPR000421 (PROSITE_PROFILES); IPR008979 (SUPERFAMILY)                                                                                                                                                                                                                                                                                                                                                           |
| 1042 | 267160_length_556_cvg_2.0_tip_1_5  | 14  | zinc finger protein 184-like                                     | 185 | 1.97E-43 | 64.80% | 0.115   | IPR015880 (SMART); IPR013087 (G3DSA:3.30.160.GENE3D); IPR013087 (G3DSA:3.30.160.GENE3D); PF13465 (PFAM); PTHR24409 (PANTHER); IPR007087 (PROSITE_PATTERNS); IPR007087 (PROSITE_PATTERNS); IPR007087 (PROSITE_PROFILES); IPR007087 (PROSITE_PROFILES); SSF57667 (SUPERFAMILY)                                                                                                                                                                                                                                                               |
| 1044 | 267644_length_560_cvg_2.0_tip_1_2  | 15  | intersectin-2 isoform x1                                         | 186 | 3.34E-66 | 75.00% | 0.107   | IPR001452 (PRINTS); PR00499 (PRINTS); IPR001452 (SMART); IPR001452 (PFAM); G3DSA:2.30.30.40 (GENE3D); G3DSA:2.30.30.40 (GENE3D); PTHR11216:SF59 (PANTHER); PTHR11216 (PANTHER); IPR001452 (PROSITE_PROFILES); IPR001452 (PROSITE_PROFILES); IPR001452 (SUPERFAMILY); IPR001452 (SUPERFAMILY)                                                                                                                                                                                                                                               |
| 1045 | 267646_length_560_cvg_3.1_tip_1_5  | 21  | ectonucleotide pyrophosphatase phosphodiesterase family member 6 | 186 | 5.03E-43 | 58.10% | 0.1     | IPR017849 (G3DSA:3.40.720.GENE3D); IPR002591 (PFAM); IPR024873 (PANTHER); IPR017850 (SUPERFAMILY)                                                                                                                                                                                                                                                                                                                                                                                                                                          |
| 1043 | 267468_length_559_cvg_2.0_tip_1_3  | 12  | protein cbfa2t1-like isoform x5                                  | 187 | 2.77E-69 | 78.30% | 0.125   | Coil (COILS); Coil (COILS); IPR013289 (PRINTS); IPR002893 (PFAM); PTHR10379 (PANTHER); IPR002893 (PROSITE_PATTERNS); IPR002893 (PROSITE_PROFILES); SSF144232 (SUPERFAMILY)                                                                                                                                                                                                                                                                                                                                                                 |
| 1046 | 267704_length_561_cvg_8.2_tip_1_4  | 43  | reticulocalbin-2                                                 | 187 | 1.36E-45 | 69.90% | 0.412 Y | IPR011992 (PFAM); IPR011992 (G3DSA:1.10.238.GENE3D); PTHR10827:SF48 (PANTHER); PTHR10827 (PANTHER); IPR018247 (PROSITE_PATTERNS); IPR002048 (PROSITE_PROFILES); IPR002048 (PROSITE_PROFILES); SSF47473 (SUPERFAMILY)                                                                                                                                                                                                                                                                                                                       |
| 1047 | 267760_length_561_cvg_3.2_tip_1_0  | 21  | zinc finger protein 628 isoform x1                               | 187 | 9.99E-16 | 57.20% | 0.137   | Coil (COILS); IPR015880 (SMART); IPR013087 (G3DSA:3.30.160.GENE3D); PF13465 (PFAM); IPR013087 (G3DSA:3.30.160.GENE3D); PTHR24409:SF14 (PANTHER); PTHR24409 (PANTHER); IPR007087 (PROSITE_PATTERNS); IPR007087 (PROSITE_PATTERNS); IPR007087 (PROSITE_PROFILES); IPR007087 (PROSITE_PROFILES); SSF57667 (SUPERFAMILY); SSF57667 (SUPERFAMILY)                                                                                                                                                                                               |
| 1048 | 267766_length_561_cvg_2.9_tip_1_4  | 23  | hornerin isoform x2                                              | 187 | 4.62E-18 | 46.80% | 0.141   | G3DSA:2.40.10.10 (GENE3D); IPR001254 (PFAM); G3DSA:2.40.10.10 (GENE3D); PTHR24268 (PANTHER); IPR001254 (PROSITE_PROFILES); IPR009003 (SUPERFAMILY)                                                                                                                                                                                                                                                                                                                                                                                         |
| 1049 | 267780_length_561_cvg_2.9_tip_1_1  | 18  | elastase 2b                                                      | 187 | 7.99E-22 | 55.40% | 0.099   | G3DSA:2.40.10.10 (GENE3D); G3DSA:2.40.10.10 (GENE3D); IPR001254 (PFAM); IPR002172 (G3DSA:4.10.400.GENE3D); PTHR24265 (PANTHER); IPR018114 (PROSITE_PATTERNS); IPR001254 (PROSITE_PROFILES); IPR002172 (PROSITE_PROFILES); IPR002172 (SUPERFAMILY); IPR009003 (SUPERFAMILY)                                                                                                                                                                                                                                                                 |
| 1051 | 267848_length_562_cvg_50.9_tip_1_4 | 742 | hemagglutinin amebocyte aggregation factor-like                  | 187 | 2.70E-10 | 72.20% | 0.108   | PF14704 (PFAM); IPR026645 (PANTHER); CYTOPLASMIC_DOMAIN (PHOBIUS); CYTOPLASMIC_DOMAIN (PHOBIUS); NON_CYTOPLASMIC_DOMAIN (PHOBIUS); TRANSMEMBRANE (PHOBIUS); TRANSMEMBRANE (PHOBIUS); TMhelix (TMHMM); TMhelix (TMHMM)                                                                                                                                                                                                                                                                                                                      |
| 1052 | 267910_length_562_cvg_2.0_tip_1_5  | 16  | upf0764 protein c1orf89 homolog                                  | 187 | 2.71E-21 | 52.20% | 0.183   | no IPS match                                                                                                                                                                                                                                                                                                                                                                                                                                                                                                                               |
| 1053 | 267914_length_562_cvg_4.2_tip_1_5  | 31  | dentin sialophosphoprotein isoform x1                            | 187 | 5.39E-40 | 59.30% | 0.098   | IPR015880 (SMART); IPR013087 (G3DSA:3.30.160.GENE3D); IPR013087 (G3DSA:3.30.160.GENE3D); PF13465 (PFAM); PTHR24409:SF14 (PANTHER); PTHR24409 (PANTHER); IPR007087 (PROSITE_PATTERNS); IPR007087 (PROSITE_PATTERNS); IPR007087 (PROSITE_PATTERNS); IPR007087 (PROSITE_PATTERNS); IPR007087 (PROSITE_PROFILES); IPR007087 (PROSITE_PROFILES); IPR007087 (PROSITE_PROFILES); IPR007087 (PROSITE_PROFILES); IPR007087 (PROSITE_PROFILES); IPR007087 (PROSITE_PROFILES); SSF57667 (SUPERFAMILY); SSF57667 (SUPERFAMILY); SSF57667 (SUPERFAMILY) |

|      |                                    |      |                                                            |     |           |        |         |                                                                                                                                                                                                                                                                                                                                                                         |
|------|------------------------------------|------|------------------------------------------------------------|-----|-----------|--------|---------|-------------------------------------------------------------------------------------------------------------------------------------------------------------------------------------------------------------------------------------------------------------------------------------------------------------------------------------------------------------------------|
| 1050 | 267828_length_562_cvg_2.0_tip_1_0  | 15   | zinc finger protein 77-like                                | 188 | 9.68E-15  | 65.90% | 0.118   | IPR015880 (SMART); IPR013087 (G3DSA:3.30.160.GENE3D); IPR013087 (G3DSA:3.30.160.GENE3D); PF13465 (PFAM); PTHR24409:SF13 (PANTHER); PTHR24409 (PANTHER); IPR007087 (PROSITE_PATTERNS); IPR007087 (PROSITE_PATTERNS); IPR007087 (PROSITE_PROFILES); IPR007087 (PROSITE_PROFILES); IPR007087 (PROSITE_PROFILES); SSF57667 (SUPERFAMILY)                                    |
| 1054 | 268168_length_565_cvg_2.0_tip_1_4  | 14   | 17-beta-hydroxysteroid dehydrogenase type partial          | 188 | 2.18E-80  | 72.20% | 0.106   | IPR002198 (PRINTS); IPR002347 (PRINTS); IPR016040 (G3DSA:3.40.50.GENE3D); IPR002198 (PFAM); PTHR24316 (PANTHER); PTHR24316:SF215 (PANTHER); IPR020904 (PROSITE_PATTERNS); SSF51735 (SUPERFAMILY)                                                                                                                                                                        |
| 1055 | 268356_length_567_cvg_2.0_tip_1_1  | 11   | adp-ribosylation factor-like protein 3-like                | 189 | 2.15E-72  | 67.00% | 0.329   | IPR006689 (PRINTS); IPR024156 (SMART); IPR005225 (TIGRFAM); IPR027417 (G3DSA:3.40.50.GENE3D); IPR006689 (PFAM); PTHR11711:SF15 (PANTHER); PTHR11711 (PANTHER); TRANSMEMBRANE (PHOBIUS); NON_CYTOPLASMIC_DOMAIN (PHOBIUS); CYTOPLASMIC_DOMAIN (PHOBIUS); IPR024156 (PROSITE_PROFILES); IPR027417 (SUPERFAMILY); TMhelix (TMHMM)                                          |
| 1056 | 268400_length_567_cvg_4.0_tip_1_3  | 28   | carboxypeptidase a2-like                                   | 189 | 3.15E-35  | 59.00% | 0.642 Y | G3DSA:3.40.630.10 (GENE3D); IPR003146 (G3DSA:3.30.70.GENE3D); IPR000834 (PFAM); IPR003146 (PFAM); PTHR11705 (PANTHER); SIGNAL_PEPTIDE_N_REGION (PHOBIUS); SIGNAL_PEPTIDE_C_REGION (PHOBIUS); SIGNAL_PEPTIDE_H_REGION (PHOBIUS); SIGNAL_PEPTIDE (PHOBIUS); NON_CYTOPLASMIC_DOMAIN (PHOBIUS); SignalP-noTM (SIGNALP_EUK); IPR009020 (SUPERFAMILY); SSF53187 (SUPERFAMILY) |
| 1057 | 268548_length_568_cvg_3.0_tip_1_1  | 21   | protein toll                                               | 189 | 6.89E-26  | 49.90% | 0.909 Y | IPR003591 (SMART); G3DSA:3.80.10.10 (GENE3D); IPR001611 (PFAM); NON_CYTOPLASMIC_DOMAIN (PHOBIUS); SIGNAL_PEPTIDE_C_REGION (PHOBIUS); SIGNAL_PEPTIDE_N_REGION (PHOBIUS); SIGNAL_PEPTIDE_H_REGION (PHOBIUS); SIGNAL_PEPTIDE (PHOBIUS); SignalP-TM (SIGNALP_GRAM_POSITIVE); SignalP-noTM (SIGNALP_GRAM_NEGATIVE); SignalP-noTM (SIGNALP_EUK); SSF52058 (SUPERFAMILY)       |
| 1060 | 268704_length_569_cvg_56.5_tip_1_5 | 2643 | ubiquitin-40s ribosomal protein s27a-like                  | 189 | 3.41E-94  | 96.10% | 0.244   | IPR019956 (PRINTS); IPR000626 (SMART); G3DSA:3.10.20.90 (GENE3D); IPR002906 (PFAM); IPR000626 (PFAM); PTHR10666:SF99 (PANTHER); PTHR10666 (PANTHER); IPR019954 (PROSITE_PATTERNS); IPR000626 (PROSITE_PROFILES); IPR029071 (SUPERFAMILY); IPR011332 (SUPERFAMILY)                                                                                                       |
| 1058 | 268584_length_568_cvg_6.9_tip_1_3  | 49   | contactin-associated protein like 5-1                      | 190 | 2.81E-69  | 73.70% | 0.103   | G3DSA:2.10.25.10 (GENE3D); PTHR10127:SF346 (PANTHER); PTHR10127 (PANTHER); IPR000742 (PROSITE_PROFILES); IPR002181 (SUPERFAMILY)                                                                                                                                                                                                                                        |
| 1059 | 268676_length_569_cvg_8.6_tip_1_0  | 52   | epithelial chloride channel partial                        | 190 | 6.47E-34  | 63.10% | 0.138   | IPR013642 (PFAM); PTHR10579:SF8 (PANTHER); PTHR10579 (PANTHER); TRANSMEMBRANE (PHOBIUS); CYTOPLASMIC_DOMAIN (PHOBIUS); NON_CYTOPLASMIC_DOMAIN (PHOBIUS); TMhelix (TMHMM)                                                                                                                                                                                                |
| 1061 | 268728_length_570_cvg_6.4_tip_1_1  | 40   | dna-directed rna polymerase ii subunit rpb1                | 190 | 4.36E-07  | 53.00% | 0.104   | PR01217 (PRINTS)                                                                                                                                                                                                                                                                                                                                                        |
| 1062 | 268848_length_571_cvg_5.5_tip_1_1  | 30   | adenosine deaminase cecr1                                  | 190 | 1.83E-57  | 62.90% | 0.157   | G3DSA:3.20.20.140 (GENE3D); IPR001365 (PFAM); PTHR11409:SF39 (PANTHER); PTHR11409 (PANTHER); SSF51556 (SUPERFAMILY)                                                                                                                                                                                                                                                     |
| 1063 | 268930_length_571_cvg_3.0_tip_1_3  | 21   | hemocyte protein-glutamine gamma-glutamyltransferase-like  | 191 | 3.27E-79  | 76.50% | 0.105   | IPR013783 (G3DSA:2.60.40.GENE3D); IPR002931 (PFAM); IPR002931 (G3DSA:3.90.260.GENE3D); IPR023608 (PANTHER); PTHR11590:SF40 (PANTHER); SSF54001 (SUPERFAMILY)                                                                                                                                                                                                            |
| 1064 | 268934_length_572_cvg_2.0_tip_1_0  | 19   | transforming growth factor-beta-induced protein ig-h3-like | 191 | 7.07E-82  | 66.00% | 0.102   | IPR000782 (SMART); IPR000782 (PFAM); IPR000782 (G3DSA:2.30.180.GENE3D); PTHR10900:SF73 (PANTHER); PTHR10900 (PANTHER); IPR011489 (PROSITE_PROFILES); IPR000782 (PROSITE_PROFILES); IPR000782 (SUPERFAMILY)                                                                                                                                                              |
| 1065 | 269042_length_572_cvg_4.3_tip_1_3  | 28   | hemagglutinin                                              | 191 | 4.34E-27  | 54.60% | 0.175   | G3DSA:2.60.120.380 (GENE3D); G3DSA:1.10.390.10 (GENE3D); IPR001570 (PFAM); IPR007280 (PFAM); SSF55486 (SUPERFAMILY)                                                                                                                                                                                                                                                     |
| 1066 | 269072_length_573_cvg_2.9_tip_1_5  | 20   | sucrase- intestinal                                        | 191 | 2.23E-33  | 57.80% | 0.103   | PTHR22762 (PANTHER); PTHR22762:SF7 (PANTHER); IPR011013 (SUPERFAMILY)                                                                                                                                                                                                                                                                                                   |
| 1067 | 269194_length_574_cvg_2.0_tip_1_1  | 15   | collagen-like protein                                      | 191 | 3.82E-19  | 46.40% | 0.12    | no IPS match                                                                                                                                                                                                                                                                                                                                                            |
| 1068 | 269194_length_574_cvg_2.0_tip_1_4  | 15   | collagen alpha-1 chain                                     | 191 | 1.56E-27  | 57.60% | 0.128   | IPR008160 (PFAM); PTHR24023 (PANTHER)                                                                                                                                                                                                                                                                                                                                   |
| 1069 | 269224_length_574_cvg_14.0_tip_1_3 | 88   | serine protease nudel-like                                 | 192 | 6.28E-07  | 52.00% | 0.102   | IPR002172 (SMART); IPR003014 (PFAM); IPR002172 (PFAM); IPR002172 (G3DSA:4.10.400.GENE3D); G3DSA:3.50.4.10 (GENE3D); IPR002172 (PROSITE_PROFILES); IPR002172 (SUPERFAMILY)                                                                                                                                                                                               |
| 1070 | 269402_length_576_cvg_3.0_tip_1_1  | 24   | myosin heavy chain variant c                               | 192 | 5.05E-113 | 98.50% | 0.112   | Coil (COILS); Coil (COILS); IPR002928 (PFAM); PTHR13140 (PANTHER); PTHR13140:SF364 (PANTHER); SSF57997 (SUPERFAMILY)                                                                                                                                                                                                                                                    |
| 1071 | 269534_length_577_cvg_4.0_tip_1_2  | 33   | hypothetical protein KGM_21983                             | 192 | 1.03E-41  | 57.70% | 0.114   | IPR000859 (SMART); IPR000859 (PFAM); IPR000859 (G3DSA:2.60.120.GENE3D); IPR000859 (PROSITE_PROFILES); IPR000859 (SUPERFAMILY)                                                                                                                                                                                                                                           |

|      |                                    |      |                                              |     |           |        |         |                                                                                                                                                                                                                                                                                                                                                                                                                                                                                                                                                                                                          |
|------|------------------------------------|------|----------------------------------------------|-----|-----------|--------|---------|----------------------------------------------------------------------------------------------------------------------------------------------------------------------------------------------------------------------------------------------------------------------------------------------------------------------------------------------------------------------------------------------------------------------------------------------------------------------------------------------------------------------------------------------------------------------------------------------------------|
| 1072 | 269592_length_577_cvg_2.0_tip_1_5  | 13   | zinc finger protein ozf                      | 192 | 3.86E-79  | 59.30% | 0.103   | IPR015880 (SMART); IPR007087 (PFAM); IPR013087 (G3DSA:3.30.160.GENE3D); IPR013087 (G3DSA:3.30.160.GENE3D); IPR013087 (G3DSA:3.30.160.GENE3D); PF13465 (PFAM); IPR013087 (G3DSA:3.30.160.GENE3D); PTHR24409 (PANTHER); IPR007087 (PROSITE_PATTERNS); IPR007087 (PROSITE_PATTERNS); IPR007087 (PROSITE_PATTERNS); IPR007087 (PROSITE_PATTERNS); IPR007087 (PROSITE_PROFILES); IPR007087 (PROSITE_PROFILES); IPR007087 (PROSITE_PROFILES); IPR007087 (PROSITE_PROFILES); IPR007087 (PROSITE_PROFILES); IPR007087 (PROSITE_PROFILES); SSF57667 (SUPERFAMILY); SSF57667 (SUPERFAMILY); SSF57667 (SUPERFAMILY) |
| 1074 | 269632_length_578_cvg_3.0_tip_1_5  | 23   | protein kinase c epsilon partial             | 192 | 1.06E-127 | 95.50% | 0.096   | IPR002290 (SMART); G3DSA:1.10.510.10 (GENE3D); G3DSA:3.30.200.20 (GENE3D); IPR000719 (PFAM); PTHR24357:SF73 (PANTHER); PTHR24357 (PANTHER); IPR008271 (PROSITE_PATTERNS); IPR000719 (PROSITE_PROFILES); IPR011009 (SUPERFAMILY)                                                                                                                                                                                                                                                                                                                                                                          |
| 1075 | 269690_length_578_cvg_47.9_tip_1_2 | 228  | ---NA---                                     | 192 |           |        | 0.182   | TMhelix (TMHMM); TMhelix (TMHMM)                                                                                                                                                                                                                                                                                                                                                                                                                                                                                                                                                                         |
| 1073 | 269610_length_578_cvg_5.1_tip_1_4  | 30   | cell recognition protein caspr4 isoform 5    | 193 | 1.88E-39  | 55.60% | 0.13    | PTHR10127 (PANTHER); PTHR10127:SF575 (PANTHER)                                                                                                                                                                                                                                                                                                                                                                                                                                                                                                                                                           |
| 1076 | 269710_length_579_cvg_5.1_tip_1_4  | 41   | isoform b                                    | 193 | 6.99E-89  | 76.30% | 0.681 Y | IPR002172 (SMART); IPR002557 (SMART); IPR002557 (G3DSA:2.170.140.GENE3D); IPR002172 (PFAM); IPR002172 (G3DSA:4.10.400.GENE3D); IPR002557 (PFAM); PTHR11177 (PANTHER); PTHR11177:SF136 (PANTHER); IPR023415 (PROSITE_PATTERNS); NON_CYTOPLASMIC_DOMAIN (PHOBIUS); SIGNAL_PEPTIDE (PHOBIUS); SIGNAL_PEPTIDE_N_REGION (PHOBIUS); SIGNAL_PEPTIDE_C_REGION (PHOBIUS); SIGNAL_PEPTIDE_H_REGION (PHOBIUS); IPR002172 (PROSITE_PROFILES); IPR002557 (PROSITE_PROFILES); SignalP-noTM (SIGNALP_EUK); IPR002557 (SUPERFAMILY); IPR002172 (SUPERFAMILY)                                                             |
| 1077 | 269718_length_579_cvg_2.0_tip_1_2  | 15   | endothelin-converting enzyme 1-like          | 193 | 3.31E-44  | 53.20% | 0.106   | IPR018497 (PFAM); IPR024079 (G3DSA:3.40.390.GENE3D); PTHR11733:SF124 (PANTHER); IPR000718 (PANTHER); SSF55486 (SUPERFAMILY)                                                                                                                                                                                                                                                                                                                                                                                                                                                                              |
| 1078 | 269724_length_579_cvg_9.0_tip_1_3  | 63   | perlucin-like protein                        | 193 | 7.30E-22  | 54.70% | 0.137   | IPR001304 (SMART); IPR001304 (PFAM); IPR016186 (G3DSA:3.10.100.GENE3D); PTHR22802 (PANTHER); IPR018378 (PROSITE_PATTERNS); IPR001304 (PROSITE_PROFILES); IPR016187 (SUPERFAMILY)                                                                                                                                                                                                                                                                                                                                                                                                                         |
| 1079 | 269776_length_579_cvg_3.0_tip_1_3  | 26   | spermatogenesis-associated protein 20        | 193 | 4.65E-58  | 80.90% | 0.134   | IPR012336 (G3DSA:3.40.30.GENE3D); IPR004879 (PFAM); PTHR12145 (PANTHER); PTHR12145:SF11 (PANTHER); IPR012336 (SUPERFAMILY)                                                                                                                                                                                                                                                                                                                                                                                                                                                                               |
| 1080 | 269816_length_580_cvg_3.7_tip_1_2  | 26   | lysosomal pro-x carboxypeptidase             | 193 | 2.83E-80  | 71.10% | 0.244   | IPR008758 (PFAM); IPR008758 (PANTHER); PTHR11010:SF11 (PANTHER)                                                                                                                                                                                                                                                                                                                                                                                                                                                                                                                                          |
| 1081 | 269822_length_580_cvg_65.2_tip_1_2 | 6630 | cathepsin l1-like                            | 193 | 2.65E-76  | 80.70% | 0.101   | IPR000668 (SMART); IPR000668 (PFAM); G3DSA:3.90.70.10 (GENE3D); PTHR12411:SF265 (PANTHER); IPR013128 (PANTHER); IPR025661 (PROSITE_PATTERNS); IPR025660 (PROSITE_PATTERNS); SSF54001 (SUPERFAMILY)                                                                                                                                                                                                                                                                                                                                                                                                       |
| 1083 | 269944_length_581_cvg_34.0_tip_1_2 | 296  | histone h2a-like                             | 193 | 1.03E-79  | 97.30% | 0.316   | IPR002119 (PRINTS); IPR002119 (SMART); IPR007125 (PFAM); IPR009072 (G3DSA:1.10.20.GENE3D); PTHR23430:SF45 (PANTHER); PTHR23430 (PANTHER); IPR002119 (PROSITE_PATTERNS); IPR009072 (SUPERFAMILY)                                                                                                                                                                                                                                                                                                                                                                                                          |
| 1082 | 269942_length_581_cvg_5.5_tip_1_3  | 44   | 39s ribosomal protein mitochondrial          | 194 | 5.45E-83  | 74.20% | 0.102   | IPR008914 (G3DSA:3.90.280.GENE3D); IPR008914 (PFAM); PTHR11362 (PANTHER); PTHR11362:SF16 (PANTHER); IPR008914 (SUPERFAMILY)                                                                                                                                                                                                                                                                                                                                                                                                                                                                              |
| 1084 | 270030_length_582_cvg_7.0_tip_1_4  | 53   | ankyrin repeat partial                       | 194 | 6.68E-37  | 60.40% | 0.115   | IPR002110 (SMART); PF13637 (PFAM); PF13857 (PFAM); IPR020683 (G3DSA:1.25.40.GENE3D); PTHR24198 (PANTHER); IPR002110 (PROSITE_PROFILES); IPR020683 (PROSITE_PROFILES); IPR002110 (PROSITE_PROFILES); IPR020683 (SUPERFAMILY)                                                                                                                                                                                                                                                                                                                                                                              |
| 1085 | 270168_length_583_cvg_2.0_tip_1_4  | 16   | cysteine-rich with egf-like domain protein 2 | 194 | 1.75E-73  | 69.60% | 0.109   | G3DSA:2.170.300.10 (GENE3D); IPR001881 (PFAM); PTHR24838:SF13 (PANTHER); PTHR24838 (PANTHER); IPR018097 (PROSITE_PATTERNS); IPR013032 (PROSITE_PATTERNS); IPR002049 (PROSITE_PATTERNS); IPR000742 (PROSITE_PROFILES); IPR009030 (SUPERFAMILY)                                                                                                                                                                                                                                                                                                                                                            |
| 1086 | 270176_length_584_cvg_4.0_tip_1_1  | 27   | adrenodoxin-like mitochondrial               | 195 | 1.44E-77  | 85.00% | 0.191   | IPR001055 (PRINTS); IPR001041 (PFAM); IPR012675 (G3DSA:3.10.20.GENE3D); PTHR23426 (PANTHER); PTHR23426:SF1 (PANTHER); IPR018298 (PROSITE_PATTERNS); IPR001041 (PROSITE_PROFILES); IPR001041 (SUPERFAMILY)                                                                                                                                                                                                                                                                                                                                                                                                |
| 1087 | 270184_length_584_cvg_2.0_tip_1_0  | 20   | ankyrin repeat domain-containing protein 39  | 195 | 5.24E-54  | 67.50% | 0.221   | IPR002110 (SMART); PF13637 (PFAM); IPR020683 (G3DSA:1.25.40.GENE3D); PF13857 (PFAM); PTHR24148 (PANTHER); IPR002110 (PROSITE_PROFILES); IPR020683 (PROSITE_PROFILES); IPR002110 (PROSITE_PROFILES); IPR002110 (PROSITE_PROFILES); IPR020683 (SUPERFAMILY)                                                                                                                                                                                                                                                                                                                                                |

|      |                                    |     |                                                    |     |           |        |       |                                                                                                                                                                                                                                                                                                                                                                                                                                                                                                                                                                                                                             |
|------|------------------------------------|-----|----------------------------------------------------|-----|-----------|--------|-------|-----------------------------------------------------------------------------------------------------------------------------------------------------------------------------------------------------------------------------------------------------------------------------------------------------------------------------------------------------------------------------------------------------------------------------------------------------------------------------------------------------------------------------------------------------------------------------------------------------------------------------|
| 1088 | 270266_length_585_cvg_19.7_tip_1_2 | 146 | adiponectin receptor protein                       | 195 | 8.19E-56  | 83.30% | 0.204 | IPR004254 (PFAM); PTHR20855:SF15 (PANTHER); IPR004254 (PANTHER); NON_CYTOPLASMIC_DOMAIN (PHOBIUS); TRANSMEMBRANE (PHOBIUS); TRANSMEMBRANE (PHOBIUS); NON_CYTOPLASMIC_DOMAIN (PHOBIUS); CYTOPLASMIC_DOMAIN (PHOBIUS); CYTOPLASMIC_DOMAIN (PHOBIUS); TRANSMEMBRANE (PHOBIUS); TRANSMEMBRANE (PHOBIUS); CYTOPLASMIC_DOMAIN (PHOBIUS); TMhelix (TMHMM); TMhelix (TMHMM); TMhelix (TMHMM); TMhelix (TMHMM)                                                                                                                                                                                                                       |
| 1089 | 270294_length_585_cvg_2.2_tip_1_1  | 15  | guanine nucleotide-binding protein subunit beta-5  | 195 | 3.14E-128 | 93.20% | 0.107 | IPR020472 (PRINTS); IPR001632 (PRINTS); IPR001680 (SMART); IPR001680 (PFAM); IPR015943 (G3DSA:2.130.10.GENE3D); IPR016346 (PANTHER); PTHR19850:SF12 (PANTHER); IPR019775 (PROSITE_PATTERNS); IPR019775 (PROSITE_PATTERNS); IPR001680 (PROSITE_PROFILES); IPR001680 (PROSITE_PROFILES); IPR017986 (PROSITE_PROFILES); IPR001680 (PROSITE_PROFILES); IPR017986 (SUPERFAMILY)                                                                                                                                                                                                                                                  |
| 1090 | 270364_length_585_cvg_14.5_tip_1_4 | 104 | iron zinc purple acid phosphatase-like partial     | 195 | 3.79E-62  | 71.20% | 0.27  | IPR003961 (PFAM); IPR015914 (G3DSA:2.60.40.GENE3D); IPR029052 (G3DSA:3.60.21.GENE3D); IPR018946 (PFAM); PTHR22953 (PANTHER); PTHR22953:SF9 (PANTHER); IPR008963 (SUPERFAMILY); TMhelix (TMHMM)                                                                                                                                                                                                                                                                                                                                                                                                                              |
| 1091 | 270476_length_587_cvg_7.2_tip_1_2  | 48  | alpha-mannosidase 2x                               | 195 | 6.13E-98  | 81.50% | 0.102 | IPR000602 (PFAM); IPR027291 (G3DSA:3.20.110.GENE3D); PTHR11607 (PANTHER); PTHR11607:SF4 (PANTHER); IPR011330 (SUPERFAMILY)                                                                                                                                                                                                                                                                                                                                                                                                                                                                                                  |
| 1092 | 270540_length_587_cvg_2.3_tip_1_4  | 23  | zinc finger protein 1 homolog                      | 196 | 1.28E-16  | 54.10% | 0.106 | IPR015880 (SMART); IPR013087 (G3DSA:3.30.160.GENE3D); PF13465 (PFAM); IPR013087 (G3DSA:3.30.160.GENE3D); PTHR24409 (PANTHER); IPR007087 (PROSITE_PATTERNS); IPR007087 (PROSITE_PROFILES); IPR007087 (PROSITE_PROFILES); SSF57667 (SUPERFAMILY)                                                                                                                                                                                                                                                                                                                                                                              |
| 1093 | 270670_length_589_cvg_4.0_tip_1_2  | 31  | tkl protein kinase                                 | 196 | 3.95E-44  | 54.30% | 0.098 | IPR003591 (SMART); IPR001611 (PFAM); G3DSA:3.80.10.10 (GENE3D); PTHR24365 (PANTHER); IPR001611 (PROSITE_PROFILES); IPR001611 (PROSITE_PROFILES); IPR001611 (PROSITE_PROFILES); IPR001611 (PROSITE_PROFILES); IPR001611 (PROSITE_PROFILES); IPR001611 (PROSITE_PROFILES); SSF52058 (SUPERFAMILY)                                                                                                                                                                                                                                                                                                                             |
| 1094 | 270678_length_589_cvg_3.9_tip_1_1  | 23  | adenylate cyclase type 9                           | 196 | 2.06E-52  | 84.20% | 0.254 | IPR001054 (PFAM); IPR001054 (G3DSA:3.30.70.GENE3D); PTHR11920:SF272 (PANTHER); PTHR11920 (PANTHER); IPR018297 (PROSITE_PATTERNS); NON_CYTOPLASMIC_DOMAIN (PHOBIUS); TRANSMEMBRANE (PHOBIUS); CYTOPLASMIC_DOMAIN (PHOBIUS); IPR001054 (PROSITE_PROFILES); IPR029787 (SUPERFAMILY); TMhelix (TMHMM)                                                                                                                                                                                                                                                                                                                           |
| 1095 | 270730_length_589_cvg_4.2_tip_1_1  | 26  | gastrula zinc finger isoform x1                    | 196 | 6.55E-63  | 68.50% | 0.103 | IPR015880 (SMART); IPR013087 (G3DSA:3.30.160.GENE3D); PF13465 (PFAM); IPR013087 (G3DSA:3.30.160.GENE3D); IPR013087 (G3DSA:3.30.160.GENE3D); IPR013087 (G3DSA:3.30.160.GENE3D); PTHR24409 (PANTHER); IPR007087 (PROSITE_PATTERNS); IPR007087 (PROSITE_PATTERNS); IPR007087 (PROSITE_PATTERNS); IPR007087 (PROSITE_PATTERNS); IPR007087 (PROSITE_PROFILES); IPR007087 (PROSITE_PROFILES); IPR007087 (PROSITE_PROFILES); IPR007087 (PROSITE_PROFILES); IPR007087 (PROSITE_PROFILES); SSF57667 (SUPERFAMILY); SSF57667 (SUPERFAMILY); SSF57667 (SUPERFAMILY); SSF57667 (SUPERFAMILY)                                            |
| 1098 | 270758_length_590_cvg_2.0_tip_1_5  | 12  | collagen alpha-1 chain                             | 196 | 6.42E-45  | 59.30% | 0.103 | IPR008160 (PFAM); PTHR24023 (PANTHER)                                                                                                                                                                                                                                                                                                                                                                                                                                                                                                                                                                                       |
| 1100 | 270820_length_590_cvg_3.4_tip_1_5  | 23  | low-density lipoprotein receptor-related protein 2 | 196 | 2.28E-94  | 83.90% | 0.102 | IPR000742 (SMART); IPR001881 (SMART); IPR002172 (SMART); IPR026823 (PFAM); IPR002172 (PFAM); IPR011042 (G3DSA:2.120.10.GENE3D); IPR002172 (G3DSA:4.10.400.GENE3D); G3DSA:2.10.25.10 (GENE3D); G3DSA:2.10.25.10 (GENE3D); PTHR10529 (PANTHER); IPR000152 (PROSITE_PATTERNS); IPR000152 (PROSITE_PATTERNS); IPR013032 (PROSITE_PATTERNS); IPR018097 (PROSITE_PATTERNS); IPR023415 (PROSITE_PATTERNS); IPR018097 (PROSITE_PATTERNS); IPR000742 (PROSITE_PROFILES); IPR002172 (PROSITE_PROFILES); IPR000742 (PROSITE_PROFILES); SSF57196 (SUPERFAMILY); IPR002172 (SUPERFAMILY); SSF63825 (SUPERFAMILY); SSF57196 (SUPERFAMILY) |
| 1096 | 270744_length_589_cvg_5.7_tip_1_0  | 33  | disks large 1 tumor suppressor protein             | 197 | 1.15E-86  | 86.60% | 0.113 | IPR001478 (SMART); IPR001478 (G3DSA:2.30.42.GENE3D); IPR001478 (G3DSA:2.30.42.GENE3D); IPR001478 (PFAM); IPR016313 (PANTHER); IPR001478 (PROSITE_PROFILES); IPR001478 (PROSITE_PROFILES); IPR001478 (SUPERFAMILY); IPR001478 (SUPERFAMILY)                                                                                                                                                                                                                                                                                                                                                                                  |
| 1097 | 270758_length_590_cvg_2.0_tip_1_1  | 12  | c protein immunoglobulin-a-binding beta antigen    | 197 | 4.79E-27  | 43.80% | 0.138 | PTHR24023 (PANTHER); PTHR24023:SF405 (PANTHER)                                                                                                                                                                                                                                                                                                                                                                                                                                                                                                                                                                              |
| 1099 | 270790_length_590_cvg_48.9_tip_0_3 | 299 | amine oxidase                                      | 197 | 1.03E-67  | 70.70% | 0.112 | IPR001613 (PRINTS); IPR002937 (PFAM); G3DSA:3.90.660.10 (GENE3D); PTHR10742 (PANTHER); PTHR10742:SF253 (PANTHER); SSF54373 (SUPERFAMILY); SSF51905 (SUPERFAMILY)                                                                                                                                                                                                                                                                                                                                                                                                                                                            |







|      |                                    |      |                                                               |     |          |        |         |                                                                                                                                                                                                                                                                                                                                                                                                                                                                                                                                                                                   |
|------|------------------------------------|------|---------------------------------------------------------------|-----|----------|--------|---------|-----------------------------------------------------------------------------------------------------------------------------------------------------------------------------------------------------------------------------------------------------------------------------------------------------------------------------------------------------------------------------------------------------------------------------------------------------------------------------------------------------------------------------------------------------------------------------------|
| 1113 | 271624_length_599_cvg_4.5_tip_1_0  | 39   | aael003561- partial                                           | 200 | 2.18E-26 | 51.80% | 0.263   | IPR001211 (PRINTS); IPR016090 (SMART); IPR016090 (PFAM); IPR016090 (G3DSA:1.20.90.GENE3D); PTHR11716:SF45 (PANTHER); IPR001211 (PANTHER); IPR013090 (PROSITE_PATTERNS); IPR013090 (PROSITE_PATTERNS); CYTOPLASMIC_DOMAIN (PHOBIUS); NON_CYTOPLASMIC_DOMAIN (PHOBIUS); TRANSMEMBRANE (PHOBIUS); IPR016090 (SUPERFAMILY); TMhelix (TMHMM)                                                                                                                                                                                                                                           |
| 1114 | 271688_length_600_cvg_5.0_tip_1_0  | 43   | zinc finger protein ozf-like isoform x2                       | 200 | 5.58E-40 | 60.00% | 0.103   | IPR015880 (SMART); IPR013087 (G3DSA:3.30.160.GENE3D); PF13465 (PFAM); IPR013087 (G3DSA:3.30.160.GENE3D); IPR013087 (G3DSA:3.30.160.GENE3D); IPR007087 (PFAM); PF13894 (PFAM); PTHR24409 (PANTHER); PTHR24409:SF13 (PANTHER); IPR007087 (PROSITE_PATTERNS); IPR007087 (PROSITE_PATTERNS); IPR007087 (PROSITE_PATTERNS); IPR007087 (PROSITE_PATTERNS); IPR007087 (PROSITE_PROFILES); IPR007087 (PROSITE_PROFILES); IPR007087 (PROSITE_PROFILES); IPR007087 (PROSITE_PROFILES); IPR007087 (PROSITE_PROFILES); SSF57667 (SUPERFAMILY); SSF57667 (SUPERFAMILY); SSF57667 (SUPERFAMILY) |
| 1115 | 271696_length_600_cvg_3.8_tip_1_4  | 28   | contactin-associated 2 precursor                              | 200 | 3.85E-29 | 53.20% | 0.104   | IPR008983 (G3DSA:2.60.120.GENE3D); IPR014716 (G3DSA:3.90.215.GENE3D); IPR001073 (PFAM); PTHR10127:SF575 (PANTHER); PTHR10127 (PANTHER); IPR001073 (PROSITE_PROFILES); IPR008983 (SUPERFAMILY); IPR002181 (SUPERFAMILY)                                                                                                                                                                                                                                                                                                                                                            |
| 1116 | 271758_length_600_cvg_59.4_tip_1_4 | 718  | plasminogen activator spa                                     | 200 | 1.63E-36 | 56.40% | 0.444 Y | IPR001314 (PRINTS); IPR001254 (SMART); G3DSA:2.40.10.10 (GENE3D); G3DSA:2.40.10.10 (GENE3D); G3DSA:2.40.10.10 (GENE3D); IPR001254 (PFAM); PTHR24276 (PANTHER); IPR018114 (PROSITE_PATTERNS); NON_CYTOPLASMIC_DOMAIN (PHOBIUS); TRANSMEMBRANE (PHOBIUS); CYTOPLASMIC_DOMAIN (PHOBIUS); IPR001254 (PROSITE_PROFILES); IPR009003 (SUPERFAMILY); TMhelix (TMHMM)                                                                                                                                                                                                                      |
| 1117 | 271804_length_601_cvg_3.5_tip_1_2  | 21   | heat shock protein 70                                         | 200 | 1.86E-22 | 74.80% | 0.1     | IPR029048 (G3DSA:1.20.1270.GENE3D); PTHR19375 (PANTHER); PTHR19375:SF155 (PANTHER); IPR029048 (SUPERFAMILY)                                                                                                                                                                                                                                                                                                                                                                                                                                                                       |
| 1118 | 271810_length_601_cvg_14.8_tip_1_5 | 110  | plasminogen activator spa                                     | 200 | 5.36E-28 | 55.50% | 0.366 Y | IPR001314 (PRINTS); IPR001254 (SMART); G3DSA:2.40.10.10 (GENE3D); G3DSA:2.40.10.10 (GENE3D); G3DSA:2.40.10.10 (GENE3D); IPR001254 (PFAM); PTHR24276 (PANTHER); IPR018114 (PROSITE_PATTERNS); SIGNAL_PEPTIDE_N_REGION (PHOBIUS); SIGNAL_PEPTIDE_H_REGION (PHOBIUS); NON_CYTOPLASMIC_DOMAIN (PHOBIUS); SIGNAL_PEPTIDE_C_REGION (PHOBIUS); SIGNAL_PEPTIDE (PHOBIUS); IPR001254 (PROSITE_PROFILES); IPR009003 (SUPERFAMILY); TMhelix (TMHMM)                                                                                                                                          |
| 1119 | 271856_length_602_cvg_73.4_tip_1_3 | 5433 | cathepsin l2 cysteine protease                                | 201 | 9.07E-62 | 68.60% | 0.348 Y | IPR000668 (SMART); IPR013201 (SMART); IPR000668 (PFAM); G3DSA:3.90.70.10 (GENE3D); IPR013201 (PFAM); PTHR12411:SF57 (PANTHER); IPR013128 (PANTHER); IPR000169 (PROSITE_PATTERNS); SIGNAL_PEPTIDE (PHOBIUS); SIGNAL_PEPTIDE_C_REGION (PHOBIUS); SIGNAL_PEPTIDE_H_REGION (PHOBIUS); SIGNAL_PEPTIDE_N_REGION (PHOBIUS); NON_CYTOPLASMIC_DOMAIN (PHOBIUS); SSF54001 (SUPERFAMILY)                                                                                                                                                                                                     |
| 1120 | 271870_length_602_cvg_3.9_tip_1_3  | 33   | sucrase- intestinal-like                                      | 201 | 1.31E-43 | 70.40% | 0.298   | IPR000322 (PFAM); PTHR22762 (PANTHER); PTHR22762:SF7 (PANTHER); IPR017853 (SUPERFAMILY)                                                                                                                                                                                                                                                                                                                                                                                                                                                                                           |
| 1121 | 271922_length_602_cvg_2.0_tip_1_3  | 14   | tolloid-like protein 2 isoform x1                             | 201 | 9.01E-73 | 68.50% | 0.132   | IPR002172 (SMART); IPR000859 (SMART); IPR000859 (PFAM); IPR000859 (G3DSA:2.60.120.GENE3D); IPR002172 (G3DSA:4.10.400.GENE3D); PTHR10127:SF557 (PANTHER); PTHR10127 (PANTHER); CYTOPLASMIC_DOMAIN (PHOBIUS); TRANSMEMBRANE (PHOBIUS); NON_CYTOPLASMIC_DOMAIN (PHOBIUS); IPR000859 (PROSITE_PROFILES); IPR000859 (SUPERFAMILY); IPR002172 (SUPERFAMILY); TMhelix (TMHMM)                                                                                                                                                                                                            |
| 1122 | 272074_length_604_cvg_4.0_tip_1_4  | 38   | sortilin-related receptor-like                                | 201 | 2.84E-66 | 66.20% | 0.131   | PTHR12106 (PANTHER); PTHR12106:SF7 (PANTHER)                                                                                                                                                                                                                                                                                                                                                                                                                                                                                                                                      |
| 1123 | 272226_length_606_cvg_7.5_tip_1_3  | 53   | nf-kappa-b inhibitor                                          | 202 | 8.37E-63 | 66.20% | 0.143   | IPR002110 (SMART); IPR020683 (PFAM); IPR020683 (G3DSA:1.25.40.GENE3D); PTHR24139 (PANTHER); IPR002110 (PROSITE_PROFILES); IPR002110 (PROSITE_PROFILES); IPR002110 (PROSITE_PROFILES); IPR020683 (PROSITE_PROFILES); IPR020683 (SUPERFAMILY)                                                                                                                                                                                                                                                                                                                                       |
| 1125 | 272328_length_607_cvg_5.6_tip_1_2  | 44   | mitochondrial import inner membrane translocase subunit tim13 | 202 | 9.92E-44 | 86.30% | 0.171   | IPR004217 (PFAM); IPR004217 (G3DSA:1.10.287.GENE3D); PTHR19338 (PANTHER); IPR004217 (SUPERFAMILY)                                                                                                                                                                                                                                                                                                                                                                                                                                                                                 |
| 1126 | 272382_length_607_cvg_17.8_tip_1_2 | 138  | myotrophin-like isoform 2                                     | 202 | 1.51E-55 | 84.20% | 0.14    | IPR002110 (SMART); IPR020683 (PFAM); IPR020683 (G3DSA:1.25.40.GENE3D); PTHR24152 (PANTHER); IPR020683 (PROSITE_PROFILES); IPR002110 (PROSITE_PROFILES); IPR020683 (SUPERFAMILY)                                                                                                                                                                                                                                                                                                                                                                                                   |



|      |                                    |     |                                                                                                                                                                             |     |           |        |       |                                                                                                                                                                                                                                                                                                                                                                                                                                                                                                                                                                                               |
|------|------------------------------------|-----|-----------------------------------------------------------------------------------------------------------------------------------------------------------------------------|-----|-----------|--------|-------|-----------------------------------------------------------------------------------------------------------------------------------------------------------------------------------------------------------------------------------------------------------------------------------------------------------------------------------------------------------------------------------------------------------------------------------------------------------------------------------------------------------------------------------------------------------------------------------------------|
| 1138 | 273030_length_615_cvg_20.8_tip_1_0 | 107 | protein shifted                                                                                                                                                             | 205 | 6.42E-19  | 68.90% | 0.105 | IPR000742 (SMART); G3DSA:2.170.300.10 (GENE3D); IPR013032 (PFAM); PTHR24838 (PANTHER); PTHR24838:SF276 (PANTHER); IPR013032 (PROSITE_PATTERNS); IPR013032 (PROSITE_PATTERNS); IPR013032 (PROSITE_PATTERNS); IPR013032 (PROSITE_PATTERNS); IPR000742 (PROSITE_PROFILES); IPR000742 (PROSITE_PROFILES)                                                                                                                                                                                                                                                                                          |
| 1139 | 273038_length_615_cvg_2.0_tip_1_3  | 21  | c-type lectin domain family 4 member g-like isoform x2                                                                                                                      | 205 | 1.56E-09  | 45.80% | 0.112 | IPR001304 (SMART); IPR001304 (PFAM); IPR016186 (G3DSA:3.10.100.GENE3D); PTHR22802 (PANTHER); IPR001304 (PROSITE_PROFILES); IPR016187 (SUPERFAMILY)                                                                                                                                                                                                                                                                                                                                                                                                                                            |
| 1140 | 273040_length_615_cvg_4.9_tip_1_3  | 42  | glucose dehydrogenase                                                                                                                                                       | 205 | 5.11E-55  | 68.70% | 0.156 | IPR000172 (PFAM); G3DSA:3.50.50.60 (GENE3D); PTHR11552 (PANTHER); PTHR11552:SF77 (PANTHER); IPR000172 (PROSITE_PATTERNS); CYTOPLASMIC_DOMAIN (PHOBIUS); NON_CYTOPLASMIC_DOMAIN (PHOBIUS); TRANSMEMBRANE (PHOBIUS); SSF51905 (SUPERFAMILY); TMhelix (TMHMM)                                                                                                                                                                                                                                                                                                                                    |
| 1141 | 273046_length_615_cvg_2.0_tip_1_3  | 13  | zinc finger protein 271 (zinc finger protein 7) (zinc finger protein znfphex133) (epstein-barr virus-induced zinc finger protein) (znf-eb) (ct-zfp48) (zinc finger protein) | 205 | 2.16E-92  | 68.80% | 0.113 | IPR015880 (SMART); IPR007087 (PFAM); IPR013087 (G3DSA:3.30.160.GENE3D); IPR013087 (G3DSA:3.30.160.GENE3D); IPR013087 (G3DSA:3.30.160.GENE3D); PF13465 (PFAM); PTHR24409 (PANTHER); IPR007087 (PROSITE_PATTERNS); IPR007087 (PROSITE_PATTERNS); IPR007087 (PROSITE_PATTERNS); IPR007087 (PROSITE_PATTERNS); IPR007087 (PROSITE_PROFILES); IPR007087 (PROSITE_PROFILES); IPR007087 (PROSITE_PROFILES); IPR007087 (PROSITE_PROFILES); IPR007087 (PROSITE_PROFILES); IPR007087 (PROSITE_PROFILES); SSF57667 (SUPERFAMILY); SSF57667 (SUPERFAMILY); SSF57667 (SUPERFAMILY); SSF57667 (SUPERFAMILY) |
| 1142 | 273062_length_615_cvg_2.0_tip_1_2  | 19  | leukotriene a-4 hydrolase                                                                                                                                                   | 205 | 1.28E-71  | 73.10% | 0.135 | IPR014782 (PRINTS); IPR014782 (PFAM); PTHR11533:SF4 (PANTHER); IPR001930 (PANTHER); SSF63737 (SUPERFAMILY)                                                                                                                                                                                                                                                                                                                                                                                                                                                                                    |
| 1143 | 273112_length_616_cvg_9.4_tip_1_1  | 81  | ---NA---                                                                                                                                                                    | 205 |           |        | 0.118 | no IPS match                                                                                                                                                                                                                                                                                                                                                                                                                                                                                                                                                                                  |
| 1144 | 273200_length_617_cvg_3.0_tip_1_5  | 22  | serine protease snake                                                                                                                                                       | 205 | 3.67E-14  | 54.50% | 0.143 | IPR001254 (PFAM); G3DSA:2.40.10.10 (GENE3D); G3DSA:2.40.10.10 (GENE3D); PTHR24268:SF81 (PANTHER); PTHR24268 (PANTHER); IPR001254 (PROSITE_PROFILES); IPR009003 (SUPERFAMILY); IPR009003 (SUPERFAMILY)                                                                                                                                                                                                                                                                                                                                                                                         |
| 1145 | 273282_length_618_cvg_60.2_tip_1_0 | 468 | thioredoxin peroxidase 2                                                                                                                                                    | 206 | 5.01E-10  | 85.60% | 0.101 | IPR012336 (G3DSA:3.40.30.GENE3D); IPR019479 (PFAM); PTHR10681 (PANTHER); NON_CYTOPLASMIC_DOMAIN (PHOBIUS); CYTOPLASMIC_DOMAIN (PHOBIUS); TRANSMEMBRANE (PHOBIUS); IPR012336 (SUPERFAMILY)                                                                                                                                                                                                                                                                                                                                                                                                     |
| 1146 | 273362_length_618_cvg_36.4_tip_1_3 | 223 | type iv secretion protein                                                                                                                                                   | 206 | 3.40E-23  | 45.50% | 0.206 | no IPS match                                                                                                                                                                                                                                                                                                                                                                                                                                                                                                                                                                                  |
| 1147 | 273366_length_618_cvg_3.0_tip_1_5  | 25  | epithelial chloride channel partial                                                                                                                                         | 206 | 3.63E-15  | 48.40% | 0.099 | IPR002035 (G3DSA:3.40.50.GENE3D); PTHR10579:SF8 (PANTHER); PTHR10579 (PANTHER); IPR002035 (SUPERFAMILY)                                                                                                                                                                                                                                                                                                                                                                                                                                                                                       |
| 1148 | 273368_length_619_cvg_5.9_tip_1_5  | 48  | trypsinogen 1                                                                                                                                                               | 206 | 1.73E-39  | 58.60% | 0.215 | IPR001314 (PRINTS); IPR001254 (SMART); IPR001254 (PFAM); G3DSA:2.40.10.10 (GENE3D); G3DSA:2.40.10.10 (GENE3D); G3DSA:2.40.10.10 (GENE3D); PTHR24265 (PANTHER); IPR018114 (PROSITE_PATTERNS); TRANSMEMBRANE (PHOBIUS); NON_CYTOPLASMIC_DOMAIN (PHOBIUS); CYTOPLASMIC_DOMAIN (PHOBIUS); IPR001254 (PROSITE_PROFILES); IPR009003 (SUPERFAMILY); TMhelix (TMHMM)                                                                                                                                                                                                                                  |
| 1149 | 273384_length_619_cvg_3.0_tip_1_0  | 23  | map kinase-activated protein kinase 2                                                                                                                                       | 207 | 2.99E-102 | 87.70% | 0.126 | IPR002290 (SMART); IPR027442 (G3DSA:4.10.1170.GENE3D); G3DSA:1.10.510.10 (GENE3D); IPR000719 (PFAM); PTHR24349 (PANTHER); PTHR24349:SF63 (PANTHER); TRANSMEMBRANE (PHOBIUS); NON_CYTOPLASMIC_DOMAIN (PHOBIUS); CYTOPLASMIC_DOMAIN (PHOBIUS); IPR000719 (PROSITE_PROFILES); IPR011009 (SUPERFAMILY); TMhelix (TMHMM)                                                                                                                                                                                                                                                                           |
| 1150 | 273412_length_619_cvg_3.0_tip_1_0  | 23  | alpha-mannosidase 2                                                                                                                                                         | 207 | 7.43E-117 | 84.10% | 0.104 | IPR000602 (PFAM); IPR027291 (G3DSA:3.20.110.GENE3D); PTHR11607 (PANTHER); PTHR11607:SF22 (PANTHER); IPR011330 (SUPERFAMILY)                                                                                                                                                                                                                                                                                                                                                                                                                                                                   |
| 1151 | 273486_length_620_cvg_4.2_tip_1_0  | 38  | sortilin-related I(dlr class) a repeats-containing-like isoform x2                                                                                                          | 207 | 5.88E-72  | 66.40% | 0.101 | PTHR12106 (PANTHER); PTHR12106:SF7 (PANTHER)                                                                                                                                                                                                                                                                                                                                                                                                                                                                                                                                                  |
| 1152 | 273576_length_621_cvg_3.0_tip_1_3  | 19  | receptor-type tyrosine-protein phosphatase partial                                                                                                                          | 207 | 2.10E-17  | 51.50% | 0.2   | IPR000242 (PFAM); IPR029021 (G3DSA:3.90.190.GENE3D); PTHR19134 (PANTHER); TRANSMEMBRANE (PHOBIUS); NON_CYTOPLASMIC_DOMAIN (PHOBIUS); TRANSMEMBRANE (PHOBIUS); CYTOPLASMIC_DOMAIN (PHOBIUS); CYTOPLASMIC_DOMAIN (PHOBIUS); IPR000242 (PROSITE_PROFILES); IPR029021 (SUPERFAMILY); TMhelix (TMHMM); TMhelix (TMHMM)                                                                                                                                                                                                                                                                             |
| 1153 | 273602_length_621_cvg_8.1_tip_1_4  | 62  | leucine-rich repeat-containing protein 57                                                                                                                                   | 207 | 4.16E-72  | 77.70% | 0.099 | IPR003591 (SMART); IPR025875 (PFAM); G3DSA:3.80.10.10 (GENE3D); IPR001611 (PFAM); PTHR23155 (PANTHER); IPR001611 (PROSITE_PROFILES); IPR001611 (PROSITE_PROFILES); IPR001611 (PROSITE_PROFILES); SSF52058 (SUPERFAMILY)                                                                                                                                                                                                                                                                                                                                                                       |

|      |                                    |     |                                                          |     |           |        |       |                                                                                                                                                                                                                                                                                                             |
|------|------------------------------------|-----|----------------------------------------------------------|-----|-----------|--------|-------|-------------------------------------------------------------------------------------------------------------------------------------------------------------------------------------------------------------------------------------------------------------------------------------------------------------|
| 1154 | 273632_length_622_cvg_3.2_tip_1_4  | 24  | lysosomal pro-x carboxypeptidase                         | 207 | 2.86E-82  | 72.00% | 0.105 | IPR008758 (PFAM); IPR008758 (PANTHER); PTHR11010:SF11 (PANTHER); IPR029058 (SUPERFAMILY)                                                                                                                                                                                                                    |
| 1155 | 273726_length_623_cvg_3.4_tip_1_5  | 26  | limulus clotting factor partial                          | 207 | 4.36E-28  | 50.70% | 0.122 | G3DSA:2.40.10.10 (GENE3D); G3DSA:2.10.25.10 (GENE3D); IPR001254 (PFAM); G3DSA:2.40.10.10 (GENE3D); IPR026823 (PFAM); PTHR24265 (PANTHER); IPR018114 (PROSITE_PATTERNS); IPR013032 (PROSITE_PATTERNS); IPR001254 (PROSITE_PROFILES); IPR000436 (PROSITE_PROFILES); IPR009003 (SUPERFAMILY)                   |
| 1156 | 273824_length_624_cvg_2.0_tip_1_4  | 18  | ryanodine receptor 44f                                   | 208 | 1.61E-96  | 83.10% | 0.113 | IPR003032 (PFAM); IPR003877 (PFAM); IPR015925 (PANTHER); PTHR13715:SF74 (PANTHER); IPR001870 (PROSITE_PROFILES); IPR013320 (SUPERFAMILY)                                                                                                                                                                    |
| 1157 | 273856_length_625_cvg_2.0_tip_1_1  | 18  | receptor-type tyrosine-protein phosphatase f             | 208 | 4.51E-81  | 78.80% | 0.1   | PR00014 (PRINTS); IPR003961 (SMART); IPR013783 (G3DSA:2.60.40.GENE3D); IPR003961 (PFAM); IPR013783 (G3DSA:2.60.40.GENE3D); PTHR10489 (PANTHER); IPR003961 (PROSITE_PROFILES); IPR003961 (PROSITE_PROFILES); IPR003961 (PROSITE_PROFILES); IPR003961 (SUPERFAMILY)                                           |
| 1158 | 274000_length_627_cvg_2.0_tip_1_0  | 13  | tyrosine-protein kinase btk29a isoform x3                | 209 | 5.10E-126 | 92.10% | 0.112 | IPR001245 (PRINTS); IPR020635 (SMART); G3DSA:1.10.510.10 (GENE3D); IPR001245 (PFAM); G3DSA:3.30.200.20 (GENE3D); PTHR24418 (PANTHER); PTHR24418:SF162 (PANTHER); IPR008266 (PROSITE_PATTERNS); IPR017441 (PROSITE_PATTERNS); IPR000719 (PROSITE_PROFILES); IPR011009 (SUPERFAMILY)                          |
| 1159 | 274060_length_627_cvg_7.5_tip_1_3  | 53  | venom carboxylesterase-6-like                            | 209 | 2.91E-50  | 52.30% | 0.104 | IPR029058 (G3DSA:3.40.50.GENE3D); IPR002018 (PFAM); PTHR11559:SF198 (PANTHER); PTHR11559 (PANTHER); IPR029058 (SUPERFAMILY)                                                                                                                                                                                 |
| 1182 | 275450_length_645_cvg_8.7_tip_1_5  | 56  | protoporphyrin ix magnesium chelatase                    | 209 | 2.64E-17  | 60.20% | 0.12  | CYTOPLASMIC_DOMAIN (PHOBIUS); TRANSMEMBRANE (PHOBIUS); CYTOPLASMIC_DOMAIN (PHOBIUS); NON_CYTOPLASMIC_DOMAIN (PHOBIUS); TRANSMEMBRANE (PHOBIUS); TMhelix (TMHMM); TMhelix (TMHMM)                                                                                                                            |
| 1160 | 274216_length_629_cvg_3.0_tip_1_3  | 27  | latrophilin-3- partial                                   | 210 | 1.85E-18  | 60.70% | 0.162 | IPR000832 (PFAM); PTHR12011:SF222 (PANTHER); PTHR12011 (PANTHER); TRANSMEMBRANE (PHOBIUS); TRANSMEMBRANE (PHOBIUS); CYTOPLASMIC_DOMAIN (PHOBIUS); NON_CYTOPLASMIC_DOMAIN (PHOBIUS); CYTOPLASMIC_DOMAIN (PHOBIUS); TMhelix (TMHMM); TMhelix (TMHMM)                                                          |
| 1161 | 274290_length_630_cvg_7.8_tip_1_0  | 61  | spondin-1-like                                           | 210 | 1.54E-79  | 68.50% | 0.233 | IPR000884 (SMART); IPR000884 (PFAM); IPR009465 (PFAM); G3DSA:2.20.100.10 (GENE3D); PTHR11311 (PANTHER); IPR009465 (PROSITE_PROFILES); IPR000884 (PROSITE_PROFILES); IPR000884 (SUPERFAMILY)                                                                                                                 |
| 1162 | 274328_length_630_cvg_6.3_tip_1_5  | 56  | peptidyl-prolyl cis-trans isomerase-like 1               | 210 | 2.55E-79  | 92.50% | 0.103 | IPR002130 (PRINTS); IPR002130 (PFAM); IPR029000 (G3DSA:2.40.100.GENE3D); IPR024936 (PANTHER); IPR020892 (PROSITE_PATTERNS); IPR002130 (PROSITE_PROFILES); IPR029000 (SUPERFAMILY)                                                                                                                           |
| 1163 | 274382_length_631_cvg_3.0_tip_1_4  | 29  | serine threonine-protein kinase sgk1 isoform x1          | 210 | 1.55E-122 | 89.00% | 0.097 | IPR002290 (SMART); G3DSA:1.10.510.10 (GENE3D); IPR000719 (PFAM); PTHR24356 (PANTHER); PTHR24356:SF121 (PANTHER); IPR008271 (PROSITE_PATTERNS); IPR000719 (PROSITE_PROFILES); IPR000961 (PROSITE_PROFILES); IPR011009 (SUPERFAMILY)                                                                          |
| 1164 | 274388_length_631_cvg_22.1_tip_1_2 | 146 | cytochrome p450 partial                                  | 210 | 2.37E-54  | 67.70% | 0.1   | IPR002401 (PRINTS); IPR001128 (PRINTS); IPR001128 (PFAM); IPR001128 (G3DSA:1.10.630.GENE3D); PTHR24305 (PANTHER); PTHR24305:SF49 (PANTHER); IPR017972 (PROSITE_PATTERNS); CYTOPLASMIC_DOMAIN (PHOBIUS); NON_CYTOPLASMIC_DOMAIN (PHOBIUS); TRANSMEMBRANE (PHOBIUS); IPR001128 (SUPERFAMILY); TMhelix (TMHMM) |
| 1165 | 274394_length_631_cvg_5.1_tip_1_2  | 40  | xanthine dehydrogenase                                   | 210 | 4.81E-81  | 83.40% | 0.178 | IPR008274 (PFAM); IPR008274 (G3DSA:3.30.365.GENE3D); PTHR11908:SF32 (PANTHER); PTHR11908 (PANTHER); IPR008274 (SUPERFAMILY)                                                                                                                                                                                 |
| 1166 | 274404_length_631_cvg_5.3_tip_1_4  | 27  | ---NA---                                                 | 210 |           |        | 0.118 | Coil (COILS)                                                                                                                                                                                                                                                                                                |
| 1167 | 274430_length_632_cvg_37.4_tip_1_2 | 330 | poly -specific endoribonuclease homolog                  | 210 | 1.38E-57  | 65.90% | 0.116 | IPR018998 (PFAM); PTHR12439 (PANTHER); SSF142877 (SUPERFAMILY)                                                                                                                                                                                                                                              |
| 1168 | 274538_length_633_cvg_8.0_tip_1_5  | 59  | von willebrand factor a domain-containing protein 8-like | 211 | 9.92E-48  | 80.70% | 0.116 | IPR011704 (PFAM); PTHR21610:SF9 (PANTHER); PTHR21610 (PANTHER)                                                                                                                                                                                                                                              |
| 1170 | 274602_length_634_cvg_3.9_tip_1_5  | 37  | aael005189- partial                                      | 211 | 3.12E-80  | 69.20% | 0.115 | IPR003112 (SMART); IPR003112 (PFAM); PTHR23192 (PANTHER); PTHR23192:SF33 (PANTHER); IPR003112 (PROSITE_PROFILES); SSF50993 (SUPERFAMILY)                                                                                                                                                                    |
| 1171 | 274662_length_634_cvg_4.1_tip_1_5  | 33  | pdz domain-containing protein 11                         | 211 | 2.10E-52  | 76.90% | 0.106 | IPR001478 (SMART); IPR001478 (PFAM); IPR001478 (G3DSA:2.30.42.GENE3D); PTHR14063 (PANTHER); IPR001478 (PROSITE_PROFILES); IPR001478 (SUPERFAMILY)                                                                                                                                                           |
| 1169 | 274598_length_634_cvg_23.2_tip_1_0 | 125 | alpha-n-acetylgalactosaminidase isoform x4               | 212 | 4.66E-92  | 85.50% | 0.15  | IPR002241 (PRINTS); IPR000111 (PFAM); IPR013785 (G3DSA:3.20.20.GENE3D); PTHR11452 (PANTHER); PTHR11452:SF23 (PANTHER); IPR000111 (PROSITE_PATTERNS); TRANSMEMBRANE (PHOBIUS); CYTOPLASMIC_DOMAIN (PHOBIUS); NON_CYTOPLASMIC_DOMAIN (PHOBIUS); IPR017853 (SUPERFAMILY)                                       |

|      |                                    |      |                                                                   |     |           |        |         |                                                                                                                                                                                                                                                                                                                                                                                                                                                                                                                                                     |
|------|------------------------------------|------|-------------------------------------------------------------------|-----|-----------|--------|---------|-----------------------------------------------------------------------------------------------------------------------------------------------------------------------------------------------------------------------------------------------------------------------------------------------------------------------------------------------------------------------------------------------------------------------------------------------------------------------------------------------------------------------------------------------------|
| 1172 | 274828_length_637_cvg_12.8_tip_1_2 | 84   | trypsin-like serine proteinase                                    | 212 | 1.81E-54  | 60.50% | 0.285   | IPR001314 (PRINTS); IPR001254 (SMART); IPR001254 (PFAM); G3DSA:2.40.10.10 (GENE3D); G3DSA:2.40.10.10 (GENE3D); PTHR24256 (PANTHER); IPR018114 (PROSITE_PATTERNS); IPR018114 (PROSITE_PATTERNS); IPR001254 (PROSITE_PROFILES); IPR009003 (SUPERFAMILY)                                                                                                                                                                                                                                                                                               |
| 1173 | 274938_length_638_cvg_8.5_tip_1_2  | 67   | coatomer subunit beta partial                                     | 212 | 5.30E-143 | 95.20% | 0.11    | IPR001680 (SMART); IPR015943 (G3DSA:2.130.10.GENE3D); IPR001680 (PFAM); PTHR19876 (PANTHER); IPR001680 (PROSITE_PROFILES); IPR017986 (PROSITE_PROFILES); IPR001680 (PROSITE_PROFILES); IPR001680 (PROSITE_PROFILES); IPR017986 (SUPERFAMILY)                                                                                                                                                                                                                                                                                                        |
| 1175 | 275080_length_640_cvg_50.8_tip_1_2 | 314  | muscle-specific protein 20                                        | 213 | 2.06E-84  | 86.10% | 0.464 Y | IPR003096 (PRINTS); IPR001997 (PRINTS); IPR001715 (SMART); IPR000557 (PFAM); IPR001715 (PFAM); IPR001715 (G3DSA:1.10.418.GENE3D); PTHR18959 (PANTHER); PTHR18959:SF51 (PANTHER); IPR001715 (PROSITE_PROFILES); IPR000557 (PROSITE_PROFILES); SignalP-noTM (SIGNALP_EUK); IPR001715 (SUPERFAMILY)                                                                                                                                                                                                                                                    |
| 1179 | 275192_length_641_cvg_86.6_tip_1_2 | 9375 | chitinase partial                                                 | 213 | 5.06E-80  | 75.60% | 0.307   | IPR011583 (SMART); IPR013781 (G3DSA:3.20.20.GENE3D); IPR001223 (PFAM); PTHR11177:SF112 (PANTHER); PTHR11177 (PANTHER); NON_CYTOPLASMIC_DOMAIN (PHOBIUS); TRANSMEMBRANE (PHOBIUS); CYTOPLASMIC_DOMAIN (PHOBIUS); IPR017853 (SUPERFAMILY); TMhelix (TMHMM)                                                                                                                                                                                                                                                                                            |
| 1174 | 275060_length_640_cvg_10.5_tip_1_3 | 69   | ---NA---                                                          | 214 |           |        | 0.145   | no IPS match                                                                                                                                                                                                                                                                                                                                                                                                                                                                                                                                        |
| 1176 | 275116_length_641_cvg_3.7_tip_1_0  | 40   | serine protease snake                                             | 214 | 5.86E-08  | 58.70% | 0.103   | IPR001254 (PFAM); G3DSA:2.40.10.10 (GENE3D); PTHR24260 (PANTHER); IPR018114 (PROSITE_PATTERNS); IPR009003 (SUPERFAMILY)                                                                                                                                                                                                                                                                                                                                                                                                                             |
| 1177 | 275146_length_641_cvg_2.5_tip_1_4  | 23   | cysteine protease inhibitor                                       | 214 | 2.67E-21  | 50.60% | 0.098   | IPR000010 (SMART); IPR000010 (PFAM); G3DSA:3.10.450.10 (GENE3D); G3DSA:3.10.450.10 (GENE3D); PTHR11413:SF26 (PANTHER); IPR027214 (PANTHER); IPR018073 (PROSITE_PATTERNS); SSF54403 (SUPERFAMILY); SSF54403 (SUPERFAMILY)                                                                                                                                                                                                                                                                                                                            |
| 1178 | 275170_length_641_cvg_2.0_tip_1_4  | 14   | fibronectin type-iii domain-containing protein 3a-like isoform x5 | 214 | 1.52E-73  | 74.10% | 0.143   | PR00014 (PRINTS); IPR003961 (SMART); IPR013783 (G3DSA:2.60.40.GENE3D); IPR003961 (PFAM); IPR013783 (G3DSA:2.60.40.GENE3D); IPR013783 (G3DSA:2.60.40.GENE3D); PTHR19900 (PANTHER); PTHR19900:SF50 (PANTHER); IPR003961 (PROSITE_PROFILES); IPR003961 (PROSITE_PROFILES); IPR003961 (PROSITE_PROFILES); IPR003961 (SUPERFAMILY)                                                                                                                                                                                                                       |
| 1180 | 275410_length_644_cvg_2.9_tip_1_4  | 26   | eukaryotic translation initiation factor 2-alpha kinase partial   | 215 | 2.48E-79  | 72.00% | 0.1     | IPR002290 (SMART); G3DSA:1.10.510.10 (GENE3D); IPR000719 (PFAM); PTHR11042:SF86 (PANTHER); PTHR11042 (PANTHER); IPR008271 (PROSITE_PATTERNS); IPR000719 (PROSITE_PROFILES); IPR011009 (SUPERFAMILY)                                                                                                                                                                                                                                                                                                                                                 |
| 1181 | 275424_length_644_cvg_8.2_tip_1_4  | 54   | tyrosine-protein kinase dnt-like                                  | 215 | 6.34E-114 | 83.10% | 0.107   | IPR001245 (PRINTS); IPR020635 (SMART); G3DSA:1.10.510.10 (GENE3D); G3DSA:3.30.200.20 (GENE3D); IPR001245 (PFAM); PTHR24416 (PANTHER); PTHR24416:SF256 (PANTHER); IPR008266 (PROSITE_PATTERNS); IPR000719 (PROSITE_PROFILES); IPR011009 (SUPERFAMILY)                                                                                                                                                                                                                                                                                                |
| 1183 | 275488_length_646_cvg_35.0_tip_1_4 | 268  | peptidase s8                                                      | 215 | 3.24E-25  | 69.80% | 0.378 Y | IPR007280 (PFAM); SIGNAL_PEPTIDE (PHOBIUS); SIGNAL_PEPTIDE_N_REGION (PHOBIUS); SIGNAL_PEPTIDE_H_REGION (PHOBIUS); NON_CYTOPLASMIC_DOMAIN (PHOBIUS); SIGNAL_PEPTIDE_C_REGION (PHOBIUS); TMhelix (TMHMM)                                                                                                                                                                                                                                                                                                                                              |
| 1184 | 275542_length_646_cvg_3.0_tip_1_2  | 23   | thrombospondin type-1 domain-containing protein partial           | 215 | 8.02E-36  | 64.00% | 0.125   | IPR000884 (SMART); IPR010909 (PFAM); IPR000884 (PFAM); G3DSA:2.20.100.10 (GENE3D); PTHR13723 (PANTHER); IPR010909 (PROSITE_PROFILES); IPR000884 (PROSITE_PROFILES); IPR000884 (SUPERFAMILY)                                                                                                                                                                                                                                                                                                                                                         |
| 1185 | 275630_length_648_cvg_2.4_tip_1_4  | 27   | zinc finger protein 226-like                                      | 216 | 2.91E-30  | 58.00% | 0.1     | IPR015880 (SMART); IPR013087 (G3DSA:3.30.160.GENE3D); IPR013087 (G3DSA:3.30.160.GENE3D); IPR007087 (PFAM); PF13465 (PFAM); IPR013087 (G3DSA:3.30.160.GENE3D); PF13912 (PFAM); PTHR24409:SF13 (PANTHER); PTHR24409 (PANTHER); IPR007087 (PROSITE_PATTERNS); IPR007087 (PROSITE_PATTERNS); IPR007087 (PROSITE_PATTERNS); IPR007087 (PROSITE_PATTERNS); IPR007087 (PROSITE_PROFILES); IPR007087 (PROSITE_PROFILES); IPR007087 (PROSITE_PROFILES); IPR007087 (PROSITE_PROFILES); SSF57667 (SUPERFAMILY); SSF57667 (SUPERFAMILY); SSF57667 (SUPERFAMILY) |
| 1186 | 275650_length_648_cvg_4.0_tip_1_2  | 32   | lactase-phlorizin hydrolase-like                                  | 216 | 2.02E-71  | 67.50% | 0.112   | IPR013781 (G3DSA:3.20.20.GENE3D); IPR001360 (PFAM); IPR001360 (PANTHER); IPR017853 (SUPERFAMILY)                                                                                                                                                                                                                                                                                                                                                                                                                                                    |
| 1188 | 275706_length_649_cvg_5.0_tip_1_2  | 37   | protein cbg06875                                                  | 216 | 6.09E-17  | 62.10% | 0.144   | PTHR11660:SF46 (PANTHER); PTHR11660 (PANTHER)                                                                                                                                                                                                                                                                                                                                                                                                                                                                                                       |



|      |                                    |      |                                                                              |     |           |        |         |                                                                                                                                                                                                                                                                                                                                                                                                                                                                                     |
|------|------------------------------------|------|------------------------------------------------------------------------------|-----|-----------|--------|---------|-------------------------------------------------------------------------------------------------------------------------------------------------------------------------------------------------------------------------------------------------------------------------------------------------------------------------------------------------------------------------------------------------------------------------------------------------------------------------------------|
| 1189 | 275756_length_649_cvg_64.9_tip_1_5 | 6486 | cathepsin l2 cysteine protease                                               | 216 | 7.14E-64  | 69.10% | 0.172   | IPR000668 (SMART); IPR013201 (SMART); G3DSA:3.90.70.10 (GENE3D); IPR013201 (PFAM); IPR000668 (PFAM); IPR013128 (PANTHER); PTHR12411:SF57 (PANTHER); IPR000169 (PROSITE_PATTERNS); TRANSMEMBRANE (PHOBIUS); NON_CYTOPLASMIC_DOMAIN (PHOBIUS); CYTOPLASMIC_DOMAIN (PHOBIUS); SSF54001 (SUPERFAMILY)                                                                                                                                                                                   |
| 1187 | 275700_length_649_cvg_3.6_tip_1_0  | 26   | c3orf33 protein                                                              | 217 | 6.65E-23  | 45.30% | 0.15    | IPR016071 (G3DSA:2.40.50.GENE3D); IPR016071 (SUPERFAMILY)                                                                                                                                                                                                                                                                                                                                                                                                                           |
| 1190 | 275852_length_650_cvg_63.0_tip_0_0 | 869  | kunitz bovine pancreatic trypsin inhibitor domain protein                    | 217 | 2.58E-51  | 58.80% | 0.11    | IPR002223 (PRINTS); IPR002223 (SMART); IPR002223 (PFAM); IPR002223 (G3DSA:4.10.410.GENE3D); IPR002223 (G3DSA:4.10.410.GENE3D); PTHR10083 (PANTHER); IPR020901 (PROSITE_PATTERNS); IPR020901 (PROSITE_PATTERNS); IPR002223 (PROSITE_PROFILES); IPR002223 (PROSITE_PROFILES); IPR002223 (PROSITE_PROFILES); IPR002223 (SUPERFAMILY); IPR002223 (SUPERFAMILY); IPR002223 (SUPERFAMILY)                                                                                                 |
| 1191 | 275932_length_651_cvg_7.5_tip_1_2  | 59   | apolipoprotein d-like                                                        | 217 | 3.65E-34  | 56.70% | 0.213   | IPR000566 (PFAM); IPR012674 (G3DSA:2.40.128.GENE3D); PTHR10612 (PANTHER); PTHR10612:SF7 (PANTHER); TRANSMEMBRANE (PHOBIUS); CYTOPLASMIC_DOMAIN (PHOBIUS); NON_CYTOPLASMIC_DOMAIN (PHOBIUS); IPR011038 (SUPERFAMILY)                                                                                                                                                                                                                                                                 |
| 1192 | 275936_length_651_cvg_3.0_tip_1_3  | 22   | low quality protein: maltase- intestinal-like                                | 217 | 2.74E-54  | 59.90% | 0.154   | IPR000322 (PFAM); PTHR22762 (PANTHER); PTHR22762:SF76 (PANTHER); IPR017853 (SUPERFAMILY); SSF51011 (SUPERFAMILY)                                                                                                                                                                                                                                                                                                                                                                    |
| 1193 | 276038_length_653_cvg_5.6_tip_1_5  | 36   | camp-dependent protein kinase catalytic subunit                              | 217 | 3.28E-148 | 97.10% | 0.109   | IPR002290 (SMART); IPR000719 (PFAM); G3DSA:3.30.200.20 (GENE3D); G3DSA:1.10.510.10 (GENE3D); PTHR24353 (PANTHER); IPR008271 (PROSITE_PATTERNS); IPR017441 (PROSITE_PATTERNS); IPR000719 (PROSITE_PROFILES); IPR011009 (SUPERFAMILY)                                                                                                                                                                                                                                                 |
| 1194 | 276048_length_653_cvg_7.9_tip_1_0  | 68   | 2-oxoglutarate and iron-dependent oxygenase domain-containing protein 3-like | 218 | 2.94E-98  | 82.20% | 0.147   | IPR006620 (SMART); IPR005123 (PFAM); PTHR14650:SF1 (PANTHER); PTHR14650 (PANTHER); IPR005123 (PROSITE_PROFILES)                                                                                                                                                                                                                                                                                                                                                                     |
| 1195 | 276136_length_654_cvg_7.2_tip_1_0  | 56   | chitinase 5 isoform x1                                                       | 218 | 2.48E-57  | 57.30% | 0.104   | IPR002557 (SMART); IPR002557 (PFAM); IPR013781 (G3DSA:3.20.20.GENE3D); IPR029070 (G3DSA:3.10.50.GENE3D); IPR001223 (PFAM); IPR002557 (G3DSA:2.170.140.GENE3D); PTHR11177 (PANTHER); PTHR11177:SF144 (PANTHER); IPR002557 (PROSITE_PROFILES); IPR002557 (SUPERFAMILY); IPR029070 (SUPERFAMILY); IPR017853 (SUPERFAMILY)                                                                                                                                                              |
| 1196 | 276140_length_654_cvg_21.0_tip_1_1 | 169  | epithelial chloride channel partial                                          | 218 | 3.29E-45  | 55.30% | 0.131   | IPR013642 (PFAM); PTHR10579:SF8 (PANTHER); PTHR10579 (PANTHER)                                                                                                                                                                                                                                                                                                                                                                                                                      |
| 1197 | 276150_length_654_cvg_3.5_tip_1_1  | 26   | gastrula zinc finger                                                         | 218 | 2.51E-37  | 54.60% | 0.097   | IPR015880 (SMART); IPR013087 (G3DSA:3.30.160.GENE3D); PF13912 (PFAM); PF13465 (PFAM); IPR013087 (G3DSA:3.30.160.GENE3D); IPR013087 (G3DSA:3.30.160.GENE3D); PF13894 (PFAM); IPR007087 (PFAM); PTHR24409 (PANTHER); IPR007087 (PROSITE_PATTERNS); IPR007087 (PROSITE_PATTERNS); IPR007087 (PROSITE_PATTERNS); IPR007087 (PROSITE_PROFILES); IPR007087 (PROSITE_PROFILES); IPR007087 (PROSITE_PROFILES); IPR007087 (PROSITE_PROFILES); SSF57667 (SUPERFAMILY); SSF57667 (SUPERFAMILY) |
| 1198 | 276156_length_654_cvg_4.6_tip_1_4  | 34   | basement membrane-specific heparan sulfate proteoglycan core partial         | 218 | 3.30E-24  | 66.40% | 0.103   | IPR003599 (SMART); IPR003598 (SMART); PF13895 (PFAM); IPR013783 (G3DSA:2.60.40.GENE3D); PTHR10489 (PANTHER); IPR007110 (PROSITE_PROFILES); SSF48726 (SUPERFAMILY)                                                                                                                                                                                                                                                                                                                   |
| 1199 | 276170_length_655_cvg_69.3_tip_1_5 | 2551 | vp302_lycmc ame: full=venom protein 302 flags: precursor                     | 218 | 2.68E-14  | 55.50% | 0.779 Y | IPR011390 (PANTHER); PTHR14186:SF8 (PANTHER); SIGNAL_PEPTIDE_H_REGION (PHOBIUS); SIGNAL_PEPTIDE_N_REGION (PHOBIUS); NON_CYTOPLASMIC_DOMAIN (PHOBIUS); SIGNAL_PEPTIDE (PHOBIUS); SIGNAL_PEPTIDE_C_REGION (PHOBIUS); IPR000867 (PROSITE_PROFILES); SignalP-TM (SIGNALP_GRAM_POSITIVE); SignalP-noTM (SIGNALP_GRAM_NEGATIVE); SignalP-noTM (SIGNALP_EUK); IPR009030 (SUPERFAMILY)                                                                                                      |
| 1200 | 276270_length_656_cvg_7.0_tip_1_3  | 53   | fibrillin-2-like                                                             | 219 | 7.63E-32  | 52.60% | 0.1     | PTHR24039:SF20 (PANTHER); IPR011398 (PANTHER)                                                                                                                                                                                                                                                                                                                                                                                                                                       |
| 1201 | 276334_length_657_cvg_12.8_tip_1_5 | 89   | low-density lipoprotein receptor                                             | 219 | 1.29E-19  | 60.20% | 0.132   | IPR002172 (PRINTS); IPR002172 (SMART); G3DSA:4.10.1220.10 (GENE3D); IPR002172 (PFAM); IPR002172 (G3DSA:4.10.400.GENE3D); IPR002172 (G3DSA:4.10.400.GENE3D); PTHR10529 (PANTHER); IPR023415 (PROSITE_PATTERNS); IPR023415 (PROSITE_PATTERNS); IPR023415 (PROSITE_PATTERNS); IPR002172 (PROSITE_PROFILES); IPR002172 (PROSITE_PROFILES); IPR002172 (PROSITE_PROFILES); IPR002172 (SUPERFAMILY); IPR002172 (SUPERFAMILY); IPR002172 (SUPERFAMILY)                                      |
| 1202 | 276384_length_658_cvg_2.6_tip_1_2  | 19   | neuroligin-2-like isoform x1                                                 | 219 | 1.60E-88  | 76.30% | 0.11    | IPR002018 (PFAM); IPR029058 (G3DSA:3.40.50.GENE3D); PTHR11559 (PANTHER); PTHR11559:SF157 (PANTHER); IPR029058 (SUPERFAMILY)                                                                                                                                                                                                                                                                                                                                                         |
| 1203 | 276554_length_660_cvg_47.0_tip_1_5 | 372  | hemagglutinin amebocyte aggregation factor-like                              | 220 | 2.76E-30  | 57.60% | 0.446 Y | PF14704 (PFAM); IPR026645 (PANTHER); CYTOPLASMIC_DOMAIN (PHOBIUS); NON_CYTOPLASMIC_DOMAIN (PHOBIUS); NON_CYTOPLASMIC_DOMAIN (PHOBIUS); TRANSMEMBRANE (PHOBIUS); CYTOPLASMIC_DOMAIN (PHOBIUS); TRANSMEMBRANE (PHOBIUS); TRANSMEMBRANE (PHOBIUS)                                                                                                                                                                                                                                      |

|      |                                    |       |                                                           |     |           |        |         |                                                                                                                                                                                                                                                                                                                                              |
|------|------------------------------------|-------|-----------------------------------------------------------|-----|-----------|--------|---------|----------------------------------------------------------------------------------------------------------------------------------------------------------------------------------------------------------------------------------------------------------------------------------------------------------------------------------------------|
| 1204 | 276570_length_660_cvg_3.5_tip_1_1  | 29    | low quality protein: cubilin                              | 220 | 8.05E-31  | 52.00% | 0.122   | IPR000859 (SMART); IPR000859 (PFAM); IPR000859 (G3DSA:2.60.120.GENE3D); IPR000859 (G3DSA:2.60.120.GENE3D); PTHR10127 (PANTHER); IPR000859 (PROSITE_PROFILES); IPR000859 (PROSITE_PROFILES); IPR000859 (SUPERFAMILY); IPR000859 (SUPERFAMILY)                                                                                                 |
| 1205 | 276728_length_663_cvg_4.0_tip_1_5  | 34    | neuropilin and tolloid-like protein 2                     | 221 | 1.63E-74  | 65.50% | 0.106   | IPR000859 (SMART); IPR000859 (PFAM); IPR000859 (G3DSA:2.60.120.GENE3D); IPR000859 (G3DSA:2.60.120.GENE3D); PTHR10127:SF572 (PANTHER); PTHR10127 (PANTHER); IPR000859 (PROSITE_PROFILES); IPR000859 (PROSITE_PROFILES); IPR000859 (SUPERFAMILY); IPR000859 (SUPERFAMILY)                                                                      |
| 1206 | 276758_length_663_cvg_54.6_tip_1_0 | 2120  | chymotrypsin-like elastase family member 2a-like          | 221 | 1.37E-25  | 62.10% | 0.176   | IPR001314 (PRINTS); IPR001254 (SMART); G3DSA:2.40.10.10 (GENE3D); IPR001254 (PFAM); G3DSA:2.40.10.10 (GENE3D); PTHR24276 (PANTHER); IPR018114 (PROSITE_PATTERNS); NON_CYTOPLASMIC_DOMAIN (PHOBIUS); TRANSMEMBRANE (PHOBIUS); CYTOPLASMIC_DOMAIN (PHOBIUS); IPR001254 (PROSITE_PROFILES); IPR009003 (SUPERFAMILY); TMhelix (TMHMM)            |
| 1207 | 276804_length_664_cvg_74.3_tip_1_1 | 10802 | trypsin-like serine proteinase 2                          | 221 | 3.95E-31  | 60.40% | 0.154   | IPR001254 (SMART); G3DSA:2.40.10.10 (GENE3D); IPR001254 (PFAM); PTHR24276 (PANTHER); IPR018114 (PROSITE_PATTERNS); NON_CYTOPLASMIC_DOMAIN (PHOBIUS); CYTOPLASMIC_DOMAIN (PHOBIUS); TRANSMEMBRANE (PHOBIUS); IPR001254 (PROSITE_PROFILES); IPR009003 (SUPERFAMILY); TMhelix (TMHMM)                                                           |
| 1228 | 277930_length_680_cvg_60.7_tip_1_3 | 1293  | clotting factor b-like                                    | 221 | 3.75E-48  | 64.00% | 0.105   | IPR001314 (PRINTS); IPR001254 (SMART); G3DSA:2.40.10.10 (GENE3D); IPR001254 (PFAM); G3DSA:2.40.10.10 (GENE3D); PTHR24256 (PANTHER); IPR018114 (PROSITE_PATTERNS); IPR001254 (PROSITE_PROFILES); IPR009003 (SUPERFAMILY)                                                                                                                      |
| 1208 | 276928_length_666_cvg_3.0_tip_1_2  | 27    | cysteine proteinase                                       | 222 | 1.78E-30  | 54.60% | 0.157   | IPR000010 (SMART); G3DSA:3.10.450.10 (GENE3D); IPR000010 (PFAM); IPR027214 (PANTHER); IPR018073 (PROSITE_PATTERNS); IPR020381 (PRODOM); SSF54403 (SUPERFAMILY); SSF54403 (SUPERFAMILY)                                                                                                                                                       |
| 1209 | 276934_length_666_cvg_6.8_tip_1_3  | 50    | hyaluronidase-like                                        | 222 | 1.15E-49  | 57.00% | 0.104   | IPR018155 (PRINTS); IPR018155 (PFAM); IPR013785 (G3DSA:3.20.20.GENE3D); IPR018155 (PANTHER); PTHR11769:SF8 (PANTHER); IPR017853 (SUPERFAMILY)                                                                                                                                                                                                |
| 1210 | 276950_length_666_cvg_3.3_tip_1_4  | 30    | isoamyl acetate-hydrolyzing esterase 1 homolog            | 222 | 1.33E-70  | 66.90% | 0.25    | IPR001087 (PFAM); IPR013830 (G3DSA:3.40.50.GENE3D); PTHR14209 (PANTHER); IPR013830 (SUPERFAMILY)                                                                                                                                                                                                                                             |
| 1211 | 277028_length_667_cvg_22.9_tip_1_2 | 174   | micos complex subunit mic27                               | 222 | 7.69E-28  | 55.60% | 0.173   | IPR019166 (PFAM); PTHR14564:SF1 (PANTHER); PTHR14564 (PANTHER); TRANSMEMBRANE (PHOBIUS); CYTOPLASMIC_DOMAIN (PHOBIUS); NON_CYTOPLASMIC_DOMAIN (PHOBIUS); CYTOPLASMIC_DOMAIN (PHOBIUS); TRANSMEMBRANE (PHOBIUS); TMhelix (TMHMM); TMhelix (TMHMM)                                                                                             |
| 1213 | 277066_length_667_cvg_26.0_tip_1_1 | 81    | 46 kda fk506-binding nuclear protein                      | 222 | 1.21E-48  | 72.80% | 0.106   | G3DSA:3.10.50.40 (GENE3D); IPR001179 (PFAM); IPR023566 (PANTHER); IPR001179 (PROSITE_PROFILES); SSF54534 (SUPERFAMILY)                                                                                                                                                                                                                       |
| 1216 | 277102_length_668_cvg_8.0_tip_1_5  | 72    | hemocyte protein-glutamine gamma-glutamyltransferase-like | 222 | 6.63E-46  | 70.20% | 0.11    | IPR008958 (PFAM); IPR013783 (G3DSA:2.60.40.GENE3D); IPR013783 (G3DSA:2.60.40.GENE3D); PTHR11590:SF40 (PANTHER); IPR023608 (PANTHER); IPR008958 (SUPERFAMILY); IPR008958 (SUPERFAMILY)                                                                                                                                                        |
| 1212 | 277046_length_667_cvg_5.0_tip_1_0  | 40    | uv radiation resistance-associated gene protein           | 223 | 5.43E-21  | 62.00% | 0.123   | Coil (COILS); PTHR15157 (PANTHER)                                                                                                                                                                                                                                                                                                            |
| 1214 | 277086_length_668_cvg_51.6_tip_1_1 | 527   | epididymal secretory protein e1                           | 223 | 8.15E-31  | 57.80% | 0.423 Y | IPR003172 (SMART); IPR003172 (PFAM); IPR003172 (G3DSA:2.60.40.GENE3D); PTHR11306 (PANTHER); TRANSMEMBRANE (PHOBIUS); NON_CYTOPLASMIC_DOMAIN (PHOBIUS); CYTOPLASMIC_DOMAIN (PHOBIUS); IPR014756 (SUPERFAMILY); TMhelix (TMHMM)                                                                                                                |
| 1215 | 277092_length_668_cvg_5.0_tip_1_0  | 41    | beta- -galactosyltransferase 7                            | 223 | 1.48E-102 | 81.60% | 0.171   | IPR003859 (PRINTS); IPR027995 (PFAM); IPR029044 (G3DSA:3.90.550.GENE3D); IPR027791 (PFAM); IPR003859 (PANTHER); PTHR19300:SF1 (PANTHER); IPR029044 (SUPERFAMILY)                                                                                                                                                                             |
| 1217 | 277232_length_670_cvg_2.0_tip_1_2  | 22    | irregular chiasm c-roughest protein isoform x1            | 223 | 2.14E-92  | 76.00% | 0.099   | IPR003598 (SMART); IPR013162 (PFAM); IPR013783 (G3DSA:2.60.40.GENE3D); PF13895 (PFAM); IPR013783 (G3DSA:2.60.40.GENE3D); IPR013783 (G3DSA:2.60.40.GENE3D); PTHR11640:SF54 (PANTHER); PTHR11640 (PANTHER); IPR007110 (PROSITE_PROFILES); IPR007110 (PROSITE_PROFILES); SSF48726 (SUPERFAMILY); SSF48726 (SUPERFAMILY); SSF48726 (SUPERFAMILY) |
| 1218 | 277238_length_670_cvg_16.1_tip_1_5 | 152   | thermolysin catalytic domain partial                      | 223 | 1.66E-12  | 48.10% | 0.367 Y | IPR025711 (PFAM); IPR011096 (PFAM); NON_CYTOPLASMIC_DOMAIN (PHOBIUS); CYTOPLASMIC_DOMAIN (PHOBIUS); TRANSMEMBRANE (PHOBIUS)                                                                                                                                                                                                                  |
| 1219 | 277258_length_670_cvg_4.1_tip_1_1  | 42    | n-acetyllactosaminide 3-alpha-galactosyltransferase       | 223 | 1.49E-21  | 63.90% | 0.441 Y | IPR029044 (G3DSA:3.90.550.GENE3D); IPR027995 (PFAM); IPR003859 (PANTHER); IPR029044 (SUPERFAMILY)                                                                                                                                                                                                                                            |

|      |                                    |       |                                                                                |     |           |        |         |                                                                                                                                                                                                                                                                                                                                                                                                                                                                                                              |
|------|------------------------------------|-------|--------------------------------------------------------------------------------|-----|-----------|--------|---------|--------------------------------------------------------------------------------------------------------------------------------------------------------------------------------------------------------------------------------------------------------------------------------------------------------------------------------------------------------------------------------------------------------------------------------------------------------------------------------------------------------------|
| 1220 | 277324_length_671_cvg_2.1_tip_1_0  | 17    | von willebrand factor type egf and pentraxin domain-containing protein partial | 224 | 6.63E-53  | 53.40% | 0.116   | IPR000436 (SMART); IPR000436 (PFAM); G3DSA:2.10.70.10 (GENE3D); G3DSA:2.10.70.10 (GENE3D); PTHR19325 (PANTHER); IPR000436 (PROSITE_PROFILES); IPR000436 (PROSITE_PROFILES); IPR000436 (PROSITE_PROFILES); IPR000436 (SUPERFAMILY); IPR000436 (SUPERFAMILY); IPR000436 (SUPERFAMILY); IPR000436 (SUPERFAMILY)                                                                                                                                                                                                 |
| 1221 | 277442_length_674_cvg_3.0_tip_1_3  | 27    | abnormal spindle-like microcephaly-associated protein homolog                  | 225 | 3.54E-67  | 65.10% | 0.112   | IPR003599 (SMART); IPR013783 (G3DSA:2.60.40.GENE3D); IPR003961 (PFAM); IPR013783 (G3DSA:2.60.40.GENE3D); IPR013783 (G3DSA:2.60.40.GENE3D); IPR013098 (PFAM); PTHR19900 (PANTHER); PTHR19900:SF44 (PANTHER); IPR007110 (PROSITE_PROFILES); IPR003961 (PROSITE_PROFILES); SSF48726 (SUPERFAMILY); IPR003961 (SUPERFAMILY); SSF48726 (SUPERFAMILY)                                                                                                                                                              |
| 1222 | 277456_length_674_cvg_2.2_tip_1_4  | 23    | fizzy-related protein homolog                                                  | 225 | 2.58E-142 | 95.40% | 0.1     | IPR001680 (SMART); IPR015943 (G3DSA:2.130.10.GENE3D); IPR001680 (PFAM); PTHR19918:SF6 (PANTHER); PTHR19918 (PANTHER); IPR019775 (PROSITE_PATTERNS); IPR019775 (PROSITE_PATTERNS); IPR019775 (PROSITE_PATTERNS); IPR017986 (PROSITE_PROFILES); IPR001680 (PROSITE_PROFILES); IPR001680 (PROSITE_PROFILES); IPR011047 (SUPERFAMILY)                                                                                                                                                                            |
| 1223 | 277470_length_674_cvg_62.7_tip_1_3 | 19099 | nidogen-2 isoform x5                                                           | 225 | 6.59E-23  | 54.70% | 0.653 Y | IPR000716 (SMART); IPR000716 (G3DSA:4.10.800.GENE3D); IPR000716 (PFAM); IPR022339 (PANTHER); IPR000716 (PROSITE_PATTERNS); IPR000716 (PROSITE_PATTERNS); SIGNAL_PEPTIDE_C_REGION (PHOBIUS); NON_CYTOPLASMIC_DOMAIN (PHOBIUS); SIGNAL_PEPTIDE_H_REGION (PHOBIUS); SIGNAL_PEPTIDE_N_REGION (PHOBIUS); SIGNAL_PEPTIDE (PHOBIUS); IPR000716 (PROSITE_PROFILES); IPR000716 (PROSITE_PROFILES); SignalP-noTM (SIGNALP_GRAM_NEGATIVE); SignalP-noTM (SIGNALP_EUK); IPR000716 (SUPERFAMILY); IPR000716 (SUPERFAMILY) |
| 1224 | 277728_length_677_cvg_5.0_tip_1_2  | 40    | ecto-nox disulfide-thiol exchanger 2                                           | 225 | 5.74E-39  | 69.60% | 0.103   | PTHR16001 (PANTHER)                                                                                                                                                                                                                                                                                                                                                                                                                                                                                          |
| 1225 | 277738_length_678_cvg_5.7_tip_1_2  | 51    | all-trans-retinol -reductase                                                   | 226 | 1.15E-76  | 70.70% | 0.311   | PF13450 (PFAM); IPR016040 (G3DSA:3.40.50.GENE3D); PTHR10668:SF61 (PANTHER); PTHR10668 (PANTHER); NON_CYTOPLASMIC_DOMAIN (PHOBIUS); SIGNAL_PEPTIDE_C_REGION (PHOBIUS); SIGNAL_PEPTIDE (PHOBIUS); SIGNAL_PEPTIDE_N_REGION (PHOBIUS); SIGNAL_PEPTIDE_H_REGION (PHOBIUS); SignalP-TM (SIGNALP_GRAM_POSITIVE); SSF51905 (SUPERFAMILY); TMhelix (TMHMM)                                                                                                                                                            |
| 1226 | 277760_length_678_cvg_40.4_tip_1_1 | 601   | mucin-5ac- partial                                                             | 226 | 1.67E-10  | 49.40% | 0.28    | IPR025155 (PFAM); CYTOPLASMIC_DOMAIN (PHOBIUS); NON_CYTOPLASMIC_DOMAIN (PHOBIUS); TRANSMEMBRANE (PHOBIUS); TMhelix (TMHMM)                                                                                                                                                                                                                                                                                                                                                                                   |
| 1227 | 277768_length_678_cvg_63.4_tip_1_4 | 781   | thioredoxin peroxidase                                                         | 226 | 4.64E-112 | 90.60% | 0.116   | IPR012336 (G3DSA:3.40.30.GENE3D); IPR000866 (PFAM); IPR019479 (PFAM); PTHR10681 (PANTHER); PTHR10681:SF101 (PANTHER); IPR012336 (PROSITE_PROFILES); IPR012336 (SUPERFAMILY)                                                                                                                                                                                                                                                                                                                                  |
| 1229 | 277944_length_681_cvg_61.3_tip_1_2 | 2140  | hypothetical protein DAPPUDRAFT_312473                                         | 227 | 1.89E-07  | 65.00% | 0.101   | IPR014044 (G3DSA:3.40.33.GENE3D); IPR001283 (PANTHER); PTHR10334:SF153 (PANTHER); CYTOPLASMIC_DOMAIN (PHOBIUS); NON_CYTOPLASMIC_DOMAIN (PHOBIUS); TRANSMEMBRANE (PHOBIUS); NON_CYTOPLASMIC_DOMAIN (PHOBIUS); TRANSMEMBRANE (PHOBIUS); TRANSMEMBRANE (PHOBIUS); CYTOPLASMIC_DOMAIN (PHOBIUS); IPR014044 (SUPERFAMILY); TMhelix (TMHMM); TMhelix (TMHMM)                                                                                                                                                       |
| 1230 | 277960_length_681_cvg_3.1_tip_1_4  | 25    | probable serine carboxypeptidase cpvl                                          | 227 | 2.60E-50  | 59.00% | 0.116   | IPR001563 (PRINTS); IPR029058 (G3DSA:3.40.50.GENE3D); IPR001563 (PFAM); IPR001563 (PANTHER); PTHR11802:SF30 (PANTHER); IPR018202 (PROSITE_PATTERNS); IPR029058 (SUPERFAMILY)                                                                                                                                                                                                                                                                                                                                 |
| 1231 | 277968_length_681_cvg_8.9_tip_1_2  | 64    | cytochrome p450 partial                                                        | 227 | 1.34E-66  | 67.10% | 0.146   | IPR001128 (PRINTS); IPR002401 (PRINTS); IPR001128 (G3DSA:1.10.630.GENE3D); IPR001128 (PFAM); PTHR24305:SF49 (PANTHER); PTHR24305 (PANTHER); IPR017972 (PROSITE_PATTERNS); CYTOPLASMIC_DOMAIN (PHOBIUS); NON_CYTOPLASMIC_DOMAIN (PHOBIUS); TRANSMEMBRANE (PHOBIUS); IPR001128 (SUPERFAMILY)                                                                                                                                                                                                                   |
| 1232 | 277970_length_681_cvg_2.9_tip_1_5  | 27    | cub and sushi domain-containing protein 3-like                                 | 227 | 9.30E-09  | 47.20% | 0.278   | IPR000859 (SMART); IPR000859 (G3DSA:2.60.120.GENE3D); IPR000859 (PFAM); PTHR22991:SF23 (PANTHER); PTHR22991 (PANTHER); IPR000859 (PROSITE_PROFILES); IPR000859 (SUPERFAMILY)                                                                                                                                                                                                                                                                                                                                 |
| 1233 | 277972_length_681_cvg_3.0_tip_1_1  | 28    | ectonucleotide pyrophosphatase phosphodiesterase family member 7-like          | 227 | 1.77E-62  | 57.50% | 0.098   | IPR002591 (PFAM); IPR017849 (G3DSA:3.40.720.GENE3D); IPR024873 (PANTHER); IPR017850 (SUPERFAMILY)                                                                                                                                                                                                                                                                                                                                                                                                            |
| 1234 | 277984_length_681_cvg_3.4_tip_1_1  | 29    | rna polymerase ii-associated protein 3                                         | 227 | 3.45E-28  | 52.90% | 0.124   | Coil (COILS); IPR019734 (SMART); PF13414 (PFAM); IPR011990 (G3DSA:1.25.40.GENE3D); PTHR22904 (PANTHER); PTHR22904:SF292 (PANTHER); IPR013026 (PROSITE_PROFILES); IPR019734 (PROSITE_PROFILES); IPR019734 (PROSITE_PROFILES); SSF48452 (SUPERFAMILY)                                                                                                                                                                                                                                                          |

|      |                                    |      |                                                             |     |           |        |       |                                                                                                                                                                                                                                                                                                                                                                                                                                                                                                                                     |
|------|------------------------------------|------|-------------------------------------------------------------|-----|-----------|--------|-------|-------------------------------------------------------------------------------------------------------------------------------------------------------------------------------------------------------------------------------------------------------------------------------------------------------------------------------------------------------------------------------------------------------------------------------------------------------------------------------------------------------------------------------------|
| 1235 | 278004_length_681_cvg_5.0_tip_1_4  | 45   | low-density lipoprotein receptor-related protein 2          | 227 | 2.23E-38  | 57.20% | 0.101 | IPR002172 (PRINTS); IPR002172 (SMART); IPR002172 (PFAM); G3DSA:4.10.1220.10 (GENE3D); IPR002172 (G3DSA:4.10.400.GENE3D); IPR002172 (G3DSA:4.10.400.GENE3D); PTHR10529 (PANTHER); IPR023415 (PROSITE_PATTERNS); IPR023415 (PROSITE_PATTERNS); IPR023415 (PROSITE_PATTERNS); IPR023415 (PROSITE_PATTERNS); IPR002172 (PROSITE_PROFILES); IPR002172 (PROSITE_PROFILES); IPR002172 (PROSITE_PROFILES); IPR002172 (PROSITE_PROFILES); IPR002172 (SUPERFAMILY); IPR002172 (SUPERFAMILY); IPR002172 (SUPERFAMILY); IPR002172 (SUPERFAMILY) |
| 1236 | 278014_length_681_cvg_5.0_tip_1_0  | 41   | phenoloxidase subunit a3-like                               | 227 | 3.51E-47  | 62.50% | 0.098 | IPR005203 (PFAM); IPR005203 (G3DSA:2.60.40.GENE3D); IPR013788 (PANTHER); PTHR11511:SF24 (PANTHER); IPR014756 (SUPERFAMILY)                                                                                                                                                                                                                                                                                                                                                                                                          |
| 1237 | 278134_length_683_cvg_5.9_tip_1_1  | 40   | camp-dependent protein kinase catalytic                     | 228 | 3.25E-124 | 86.40% | 0.106 | IPR000961 (SMART); IPR002290 (SMART); G3DSA:1.10.510.10 (GENE3D); IPR017892 (PFAM); IPR000719 (PFAM); PTHR24357:SF70 (PANTHER); PTHR24357 (PANTHER); IPR000961 (PROSITE_PROFILES); IPR000719 (PROSITE_PROFILES); IPR011009 (SUPERFAMILY)                                                                                                                                                                                                                                                                                            |
| 1238 | 278136_length_683_cvg_3.8_tip_1_3  | 29   | low quality protein: abc transporter f family member 4-like | 228 | 2.42E-08  | 55.00% | 0.112 | Coil (COILS); Coil (COILS)                                                                                                                                                                                                                                                                                                                                                                                                                                                                                                          |
| 1239 | 278138_length_683_cvg_45.1_tip_1_1 | 471  | macrophage migration inhibitory factor                      | 228 | 2.90E-39  | 69.80% | 0.114 | G3DSA:3.30.429.10 (GENE3D); IPR001398 (PFAM); PTHR11954:SF6 (PANTHER); IPR001398 (PANTHER); IPR001398 (PRODOM); IPR014347 (SUPERFAMILY)                                                                                                                                                                                                                                                                                                                                                                                             |
| 1240 | 278320_length_686_cvg_4.5_tip_1_5  | 36   | serine protease mitochondrial                               | 228 | 8.85E-98  | 78.00% | 0.11  | IPR001940 (PRINTS); G3DSA:2.40.10.10 (GENE3D); PF13365 (PFAM); G3DSA:2.40.10.10 (GENE3D); PTHR22939 (PANTHER); IPR009003 (SUPERFAMILY)                                                                                                                                                                                                                                                                                                                                                                                              |
| 1241 | 278328_length_686_cvg_21.9_tip_1_0 | 169  | guanine nucleotide-binding protein g g subunit beta-1       | 229 | 3.32E-122 | 97.80% | 0.125 | Coil (COILS); IPR001632 (PRINTS); IPR001680 (SMART); IPR001680 (PFAM); IPR015943 (G3DSA:2.130.10.GENE3D); IPR016346 (PANTHER); IPR019775 (PROSITE_PATTERNS); IPR019775 (PROSITE_PATTERNS); IPR001680 (PROSITE_PROFILES); IPR017986 (PROSITE_PROFILES); IPR001680 (PROSITE_PROFILES); IPR017986 (SUPERFAMILY)                                                                                                                                                                                                                        |
| 1242 | 278344_length_686_cvg_3.0_tip_1_3  | 26   | protein gdap2 homolog                                       | 229 | 2.99E-83  | 73.20% | 0.106 | IPR002589 (SMART); G3DSA:3.40.220.10 (GENE3D); IPR002589 (PFAM); PTHR11106 (PANTHER); PTHR11106:SF59 (PANTHER); IPR002589 (PROSITE_PROFILES); SSF52949 (SUPERFAMILY)                                                                                                                                                                                                                                                                                                                                                                |
| 1243 | 278366_length_687_cvg_6.4_tip_1_0  | 51   | keratin-associated protein 5-9-like                         | 229 | 2.20E-12  | 67.30% | 0.095 | no IPS match                                                                                                                                                                                                                                                                                                                                                                                                                                                                                                                        |
| 1244 | 278438_length_688_cvg_6.7_tip_1_4  | 52   | otopetrin-2 isoform x1                                      | 229 | 1.29E-84  | 77.70% | 0.142 | IPR004878 (PFAM); IPR004878 (PANTHER); PTHR21522:SF37 (PANTHER); CYTOPLASMIC_DOMAIN (PHOBIUS); CYTOPLASMIC_DOMAIN (PHOBIUS); TRANSMEMBRANE (PHOBIUS); TRANSMEMBRANE (PHOBIUS); NON_CYTOPLASMIC_DOMAIN (PHOBIUS); TRANSMEMBRANE (PHOBIUS); CYTOPLASMIC_DOMAIN (PHOBIUS); TRANSMEMBRANE (PHOBIUS); NON_CYTOPLASMIC_DOMAIN (PHOBIUS); TMhelix (TMHMM); TMhelix (TMHMM)                                                                                                                                                                 |
| 1245 | 278582_length_690_cvg_3.0_tip_1_1  | 28   | chondroitin sulfate                                         | 230 | 3.87E-72  | 69.60% | 0.101 | IPR008428 (PFAM); PTHR12369:SF11 (PANTHER); PTHR12369 (PANTHER)                                                                                                                                                                                                                                                                                                                                                                                                                                                                     |
| 1246 | 278628_length_690_cvg_79.7_tip_1_0 | 4134 | dermatopontin 2                                             | 230 | 3.28E-38  | 58.90% | 0.25  | PF14704 (PFAM); IPR026645 (PANTHER); NON_CYTOPLASMIC_DOMAIN (PHOBIUS); SIGNAL_PEPTIDE_C_REGION (PHOBIUS); SIGNAL_PEPTIDE_N_REGION (PHOBIUS); SIGNAL_PEPTIDE_H_REGION (PHOBIUS); SIGNAL_PEPTIDE (PHOBIUS); TMhelix (TMHMM)                                                                                                                                                                                                                                                                                                           |
| 1247 | 278632_length_690_cvg_21.0_tip_1_5 | 182  | diuretic hormone class 2-like                               | 230 | 1.39E-29  | 73.30% | 0.15  | NON_CYTOPLASMIC_DOMAIN (PHOBIUS); TRANSMEMBRANE (PHOBIUS); CYTOPLASMIC_DOMAIN (PHOBIUS); TMhelix (TMHMM)                                                                                                                                                                                                                                                                                                                                                                                                                            |
| 1248 | 278780_length_693_cvg_2.9_tip_1_3  | 28   | very low-density lipoprotein receptor-like isoform x1       | 231 | 2.34E-19  | 43.60% | 0.101 | IPR002172 (PRINTS); IPR002172 (SMART); IPR002172 (PFAM); IPR002172 (G3DSA:4.10.400.GENE3D); IPR002172 (G3DSA:4.10.400.GENE3D); IPR002172 (G3DSA:4.10.400.GENE3D); PTHR10529 (PANTHER); IPR002172 (PROSITE_PROFILES); IPR002172 (PROSITE_PROFILES); IPR002172 (PROSITE_PROFILES); IPR002172 (SUPERFAMILY); IPR002172 (SUPERFAMILY); IPR002172 (SUPERFAMILY); IPR002172 (SUPERFAMILY)                                                                                                                                                 |
| 1249 | 278786_length_693_cvg_39.0_tip_1_3 | 311  | cytosolic non-specific dipeptidase                          | 231 | 1.40E-109 | 84.00% | 0.133 | G3DSA:3.40.630.10 (GENE3D); IPR002933 (PFAM); PTHR11014:SF51 (PANTHER); PTHR11014 (PANTHER); IPR001261 (PROSITE_PATTERNS); SSF53187 (SUPERFAMILY)                                                                                                                                                                                                                                                                                                                                                                                   |
| 1250 | 278906_length_694_cvg_5.9_tip_1_0  | 58   | hemocyte protein-glutamine gamma-glutamyltransferase-like   | 232 | 6.44E-100 | 78.90% | 0.146 | IPR013783 (G3DSA:2.60.40.GENE3D); IPR002931 (G3DSA:3.90.260.GENE3D); IPR008958 (PFAM); IPR023608 (PANTHER); PTHR11590:SF40 (PANTHER); SSF54001 (SUPERFAMILY); IPR008958 (SUPERFAMILY)                                                                                                                                                                                                                                                                                                                                               |
| 1251 | 279026_length_697_cvg_4.0_tip_1_5  | 36   | protein phosphatase 1 regulatory subunit 27                 | 232 | 2.72E-61  | 70.90% | 0.133 | IPR002110 (SMART); IPR020683 (G3DSA:1.25.40.GENE3D); IPR020683 (PFAM); PTHR24179 (PANTHER); PTHR24179:SF23 (PANTHER); IPR002110 (PROSITE_PROFILES); IPR002110 (PROSITE_PROFILES); IPR020683 (PROSITE_PROFILES); IPR020683 (SUPERFAMILY)                                                                                                                                                                                                                                                                                             |



|      |                                    |      |                                                                                 |     |           |        |       |                                                                                                                                                                                                                                                                                                                                                                                                                                                                                                                                                                                  |
|------|------------------------------------|------|---------------------------------------------------------------------------------|-----|-----------|--------|-------|----------------------------------------------------------------------------------------------------------------------------------------------------------------------------------------------------------------------------------------------------------------------------------------------------------------------------------------------------------------------------------------------------------------------------------------------------------------------------------------------------------------------------------------------------------------------------------|
| 1252 | 279050_length_697_cvg_4.0_tip_1_1  | 38   | mitogen-activated protein kinase kinase kinase 4                                | 232 | 9.90E-99  | 79.40% | 0.11  | IPR002290 (SMART); IPR000719 (PFAM); IPR016253 (PIRSF); G3DSA:1.10.510.10 (GENE3D); G3DSA:3.30.200.20 (GENE3D); PTHR24360:SF47 (PANTHER); PTHR24360 (PANTHER); IPR008271 (PROSITE_PATTERNS); IPR000719 (PROSITE_PROFILES); IPR011009 (SUPERFAMILY)                                                                                                                                                                                                                                                                                                                               |
| 1253 | 279084_length_697_cvg_3.8_tip_1_3  | 32   | fk506-binding protein 2                                                         | 233 | 2.19E-67  | 84.70% | 0.28  | IPR001179 (PFAM); G3DSA:3.10.50.40 (GENE3D); IPR023566 (PANTHER); PTHR10516:SF134 (PANTHER); CYTOPLASMIC_DOMAIN (PHOBIUS); TRANSMEMBRANE (PHOBIUS); NON_CYTOPLASMIC_DOMAIN (PHOBIUS); IPR001179 (PROSITE_PROFILES); SSF54534 (SUPERFAMILY); TMhelix (TMHMM)                                                                                                                                                                                                                                                                                                                      |
| 1254 | 279092_length_698_cvg_3.4_tip_1_4  | 31   | serine threonine-protein phosphatase 6 regulatory ankyrin repeat subunit c-like | 233 | 1.81E-46  | 55.60% | 0.112 | IPR002110 (PRINTS); IPR002110 (SMART); IPR020683 (G3DSA:1.25.40.GENE3D); IPR020683 (G3DSA:1.25.40.GENE3D); IPR002110 (PFAM); IPR020683 (G3DSA:1.25.40.GENE3D); IPR020683 (PFAM); PTHR24198 (PANTHER); IPR020683 (PROSITE_PROFILES); IPR002110 (PROSITE_PROFILES); IPR002110 (PROSITE_PROFILES); IPR002110 (PROSITE_PROFILES); IPR002110 (PROSITE_PROFILES); IPR002110 (PROSITE_PROFILES); IPR020683 (SUPERFAMILY)                                                                                                                                                                |
| 1255 | 279194_length_699_cvg_6.0_tip_1_3  | 49   | succinate-semialdehyde mitochondrial                                            | 233 | 6.56E-105 | 79.10% | 0.103 | IPR015590 (PFAM); IPR016162 (G3DSA:3.40.605.GENE3D); IPR016163 (G3DSA:3.40.309.GENE3D); PTHR11699:SF49 (PANTHER); PTHR11699 (PANTHER); IPR029510 (PROSITE_PATTERNS); IPR016161 (SUPERFAMILY)                                                                                                                                                                                                                                                                                                                                                                                     |
| 1257 | 279274_length_700_cvg_18.9_tip_1_1 | 106  | protein                                                                         | 233 | 4.08E-29  | 83.10% | 0.146 | TRANSMEMBRANE (PHOBIUS); CYTOPLASMIC_DOMAIN (PHOBIUS); NON_CYTOPLASMIC_DOMAIN (PHOBIUS)                                                                                                                                                                                                                                                                                                                                                                                                                                                                                          |
| 1256 | 279266_length_700_cvg_82.0_tip_1_3 | 1240 | nidogen-related basement membrane protein                                       | 234 | 5.72E-07  | 52.00% | 0.103 | IPR000716 (SMART); IPR000716 (G3DSA:4.10.800.GENE3D); IPR000716 (PFAM); IPR000716 (PROSITE_PATTERNS); IPR000716 (PROSITE_PROFILES); IPR000716 (SUPERFAMILY)                                                                                                                                                                                                                                                                                                                                                                                                                      |
| 1258 | 279308_length_701_cvg_24.9_tip_1_0 | 171  | protein spaetzle                                                                | 234 | 8.59E-17  | 51.50% | 0.099 | CYTOPLASMIC_DOMAIN (PHOBIUS); NON_CYTOPLASMIC_DOMAIN (PHOBIUS); TRANSMEMBRANE (PHOBIUS); IPR029034 (SUPERFAMILY); TMhelix (TMHMM)                                                                                                                                                                                                                                                                                                                                                                                                                                                |
| 1259 | 279366_length_702_cvg_3.0_tip_1_5  | 20   | kelch-like protein diablo                                                       | 234 | 3.29E-136 | 95.00% | 0.108 | IPR011705 (SMART); IPR000210 (SMART); G3DSA:3.30.710.10 (GENE3D); IPR011705 (PFAM); IPR013069 (PFAM); PTHR24412 (PANTHER); IPR000210 (PROSITE_PROFILES); IPR011333 (SUPERFAMILY)                                                                                                                                                                                                                                                                                                                                                                                                 |
| 1260 | 279376_length_703_cvg_3.2_tip_1_1  | 33   | folistatin-related protein 5- partial                                           | 234 | 2.36E-136 | 88.70% | 0.098 | PTHR10913 (PANTHER); PTHR10913:SF14 (PANTHER); SSF63825 (SUPERFAMILY)                                                                                                                                                                                                                                                                                                                                                                                                                                                                                                            |
| 1262 | 279402_length_703_cvg_5.6_tip_1_4  | 61   | carcinolectin 5b partial                                                        | 234 | 2.15E-43  | 65.20% | 0.109 | IPR002181 (SMART); IPR002181 (PFAM); IPR014715 (G3DSA:4.10.530.GENE3D); IPR014716 (G3DSA:3.90.215.GENE3D); PTHR19143 (PANTHER); IPR020837 (PROSITE_PATTERNS); IPR002181 (PROSITE_PROFILES); IPR002181 (SUPERFAMILY)                                                                                                                                                                                                                                                                                                                                                              |
| 1261 | 279380_length_703_cvg_2.0_tip_1_3  | 18   | zinc finger x-linked protein zxdb                                               | 235 | 6.17E-90  | 72.80% | 0.101 | IPR015880 (SMART); IPR007087 (PFAM); IPR013087 (G3DSA:3.30.160.GENE3D); IPR013087 (G3DSA:3.30.160.GENE3D); IPR013087 (G3DSA:3.30.160.GENE3D); PTHR19818 (PANTHER); PTHR19818:SF68 (PANTHER); IPR007087 (PROSITE_PATTERNS); IPR007087 (PROSITE_PATTERNS); IPR007087 (PROSITE_PATTERNS); IPR007087 (PROSITE_PATTERNS); IPR007087 (PROSITE_PATTERNS); IPR007087 (PROSITE_PROFILES); IPR007087 (PROSITE_PROFILES); IPR007087 (PROSITE_PROFILES); IPR007087 (PROSITE_PROFILES); IPR007087 (PROSITE_PROFILES); SSF57667 (SUPERFAMILY); SSF57667 (SUPERFAMILY); SSF57667 (SUPERFAMILY)  |
| 1264 | 279606_length_706_cvg_11.6_tip_1_5 | 88   | membrane glycoprotein lig-                                                      | 235 | 1.72E-16  | 47.20% | 0.1   | G3DSA:3.80.10.10 (GENE3D); PTHR24373 (PANTHER); IPR001611 (PROSITE_PROFILES); IPR001611 (PROSITE_PROFILES); SSF52058 (SUPERFAMILY)                                                                                                                                                                                                                                                                                                                                                                                                                                               |
| 1265 | 279630_length_706_cvg_3.0_tip_1_4  | 27   | carboxypeptidase e-like                                                         | 235 | 2.29E-118 | 81.50% | 0.133 | IPR000834 (SMART); G3DSA:3.40.630.10 (GENE3D); IPR000834 (PFAM); PTHR11532:SF41 (PANTHER); PTHR11532 (PANTHER); IPR000834 (PROSITE_PATTERNS); SSF53187 (SUPERFAMILY)                                                                                                                                                                                                                                                                                                                                                                                                             |
| 1263 | 279578_length_706_cvg_6.2_tip_1_0  | 45   | protein bowel                                                                   | 236 | 1.90E-105 | 82.30% | 0.115 | IPR015880 (SMART); PF13894 (PFAM); IPR013087 (G3DSA:3.30.160.GENE3D); IPR007087 (PFAM); IPR013087 (G3DSA:3.30.160.GENE3D); IPR013087 (G3DSA:3.30.160.GENE3D); PF13465 (PFAM); PTHR14196:SF0 (PANTHER); PTHR14196 (PANTHER); IPR007087 (PROSITE_PATTERNS); IPR007087 (PROSITE_PATTERNS); IPR007087 (PROSITE_PATTERNS); IPR007087 (PROSITE_PATTERNS); IPR007087 (PROSITE_PROFILES); IPR007087 (PROSITE_PROFILES); IPR007087 (PROSITE_PROFILES); IPR007087 (PROSITE_PROFILES); IPR007087 (PROSITE_PROFILES); SSF57667 (SUPERFAMILY); SSF57667 (SUPERFAMILY); SSF57667 (SUPERFAMILY) |



|      |                                    |      |                                                  |     |           |        |         |                                                                                                                                                                                                                                                                                                                                                                                                                                                                                                                                                                                       |
|------|------------------------------------|------|--------------------------------------------------|-----|-----------|--------|---------|---------------------------------------------------------------------------------------------------------------------------------------------------------------------------------------------------------------------------------------------------------------------------------------------------------------------------------------------------------------------------------------------------------------------------------------------------------------------------------------------------------------------------------------------------------------------------------------|
| 1266 | 279660_length_707_cvg_3.0_tip_1_1  | 26   | zinc finger protein 26-like                      | 236 | 3.25E-39  | 55.70% | 0.1     | IPR015880 (SMART); IPR013087 (G3DSA:3.30.160.GENE3D); IPR013087 (G3DSA:3.30.160.GENE3D); PF13894 (PFAM); IPR007087 (PFAM); PF13465 (PFAM); IPR013087 (G3DSA:3.30.160.GENE3D); PTHR24409 (PANTHER); IPR007087 (PROSITE_PATTERNS); IPR007087 (PROSITE_PATTERNS); IPR007087 (PROSITE_PATTERNS); IPR007087 (PROSITE_PATTERNS); IPR007087 (PROSITE_PROFILES); IPR007087 (PROSITE_PROFILES); IPR007087 (PROSITE_PROFILES); IPR007087 (PROSITE_PROFILES); IPR007087 (PROSITE_PROFILES); IPR007087 (PROSITE_PROFILES); SSF57667 (SUPERFAMILY); SSF57667 (SUPERFAMILY); SSF57667 (SUPERFAMILY) |
| 1267 | 279692_length_707_cvg_36.0_tip_1_4 | 297  | 26s proteasome non-atpase regulatory subunit 10  | 236 | 2.84E-81  | 71.60% | 0.142   | IPR002110 (PRINTS); IPR002110 (SMART); IPR020683 (G3DSA:1.25.40.GENE3D); IPR020683 (PFAM); IPR020683 (G3DSA:1.25.40.GENE3D); PTHR24199 (PANTHER); IPR002110 (PROSITE_PROFILES); IPR002110 (PROSITE_PROFILES); IPR002110 (PROSITE_PROFILES); IPR002110 (PROSITE_PROFILES); IPR002110 (PROSITE_PROFILES); IPR002110 (PROSITE_PROFILES); IPR020683 (SUPERFAMILY)                                                                                                                                                                                                                         |
| 1268 | 279732_length_708_cvg_10.8_tip_1_2 | 68   | uncharacterized oxidoreductase                   | 236 | 1.29E-62  | 69.10% | 0.099   | IPR002198 (PRINTS); IPR002347 (PRINTS); IPR002198 (PFAM); IPR016040 (G3DSA:3.40.50.GENE3D); PTHR24322:SF237 (PANTHER); PTHR24322 (PANTHER); SSF51735 (SUPERFAMILY)                                                                                                                                                                                                                                                                                                                                                                                                                    |
| 1269 | 279790_length_709_cvg_8.7_tip_1_2  | 70   | biotinidase                                      | 236 | 4.20E-29  | 54.40% | 0.214   | IPR003010 (G3DSA:3.60.110.GENE3D); IPR003010 (PFAM); IPR012101 (PANTHER); PTHR10609:SF14 (PANTHER); IPR003010 (PROSITE_PROFILES); IPR003010 (SUPERFAMILY)                                                                                                                                                                                                                                                                                                                                                                                                                             |
| 1270 | 279854_length_710_cvg_27.8_tip_1_0 | 182  | induced during granule regeneration 1            | 237 | 1.10E-14  | 50.14% | 0.103   | no IPS match                                                                                                                                                                                                                                                                                                                                                                                                                                                                                                                                                                          |
| 1271 | 279856_length_710_cvg_62.8_tip_1_4 | 1397 | pacifastin light chain                           | 237 | 6.30E-17  | 50.40% | 0.846 Y | IPR008037 (PFAM); SIGNAL_PEPTIDE_C_REGION (PHOBIUS); SIGNAL_PEPTIDE_N_REGION (PHOBIUS); NON_CYTOPLASMIC_DOMAIN (PHOBIUS); SIGNAL_PEPTIDE_H_REGION (PHOBIUS); SIGNAL_PEPTIDE (PHOBIUS); IPR020862 (PROSITE_PROFILES); IPR020862 (PROSITE_PROFILES); IPR020862 (PROSITE_PROFILES); SignalP-TM (SIGNALP_GRAM_POSITIVE); SignalP-noTM (SIGNALP_EUK); IPR008037 (SUPERFAMILY); IPR008037 (SUPERFAMILY); IPR008037 (SUPERFAMILY); TMhelix (TMHMM)                                                                                                                                           |
| 1272 | 279926_length_711_cvg_66.3_tip_1_3 | 732  | hemagglutinin amebocyte aggregation factor-like  | 237 | 1.50E-40  | 62.60% | 0.677 Y | PF14704 (PFAM); IPR026645 (PANTHER); SIGNAL_PEPTIDE_H_REGION (PHOBIUS); NON_CYTOPLASMIC_DOMAIN (PHOBIUS); SIGNAL_PEPTIDE_C_REGION (PHOBIUS); CYTOPLASMIC_DOMAIN (PHOBIUS); SIGNAL_PEPTIDE_N_REGION (PHOBIUS); SIGNAL_PEPTIDE (PHOBIUS); TRANSMEMBRANE (PHOBIUS); SignalP-noTM (SIGNALP_EUK)                                                                                                                                                                                                                                                                                           |
| 1274 | 280040_length_713_cvg_9.0_tip_1_5  | 76   | peptidoglycan recognition protein 3 short class  | 237 | 6.63E-59  | 64.70% | 0.878 Y | IPR002502 (SMART); IPR006619 (SMART); IPR002502 (G3DSA:3.40.80.GENE3D); IPR002502 (PFAM); IPR015510 (PANTHER); SIGNAL_PEPTIDE_N_REGION (PHOBIUS); SIGNAL_PEPTIDE (PHOBIUS); NON_CYTOPLASMIC_DOMAIN (PHOBIUS); SIGNAL_PEPTIDE_H_REGION (PHOBIUS); SIGNAL_PEPTIDE_C_REGION (PHOBIUS); SignalP-noTM (SIGNALP_EUK); IPR002502 (SUPERFAMILY); TMhelix (TMHMM)                                                                                                                                                                                                                              |
| 1273 | 280038_length_713_cvg_4.0_tip_1_3  | 49   | vitellogenin- partial                            | 238 | 2.77E-14  | 44.70% | 0.109   | PTHR23345 (PANTHER); PTHR23345:SF1 (PANTHER); IPR001846 (PROSITE_PROFILES)                                                                                                                                                                                                                                                                                                                                                                                                                                                                                                            |
| 1275 | 280314_length_717_cvg_3.0_tip_1_4  | 39   | plexin domain-containing protein 2-like          | 239 | 1.08E-37  | 46.20% | 0.183   | IPR016201 (SMART); G3DSA:3.30.1680.10 (GENE3D); PTHR13055 (PANTHER); PTHR13055:SF12 (PANTHER); CYTOPLASMIC_DOMAIN (PHOBIUS); TRANSMEMBRANE (PHOBIUS); NON_CYTOPLASMIC_DOMAIN (PHOBIUS); IPR016201 (SUPERFAMILY); TMhelix (TMHMM)                                                                                                                                                                                                                                                                                                                                                      |
| 1276 | 280328_length_718_cvg_10.9_tip_0_5 | 68   | marginal zone b- and b1-cell-specific protein    | 239 | 1.76E-43  | 59.10% | 0.105   | PTHR15881 (PANTHER); PTHR15881:SF1 (PANTHER)                                                                                                                                                                                                                                                                                                                                                                                                                                                                                                                                          |
| 1277 | 280358_length_718_cvg_3.1_tip_1_4  | 27   | prenylcysteine oxidase-like                      | 239 | 6.22E-52  | 61.70% | 0.128   | IPR010795 (PFAM); IPR017046 (PANTHER)                                                                                                                                                                                                                                                                                                                                                                                                                                                                                                                                                 |
| 1278 | 280388_length_719_cvg_7.0_tip_1_3  | 61   | receptor-type tyrosine-protein phosphatase n2    | 240 | 9.18E-157 | 92.50% | 0.11    | IPR000242 (PRINTS); IPR003595 (SMART); IPR000242 (SMART); IPR029021 (G3DSA:3.90.190.GENE3D); IPR000242 (PFAM); PTHR19134 (PANTHER); PTHR19134:SF2 (PANTHER); IPR016130 (PROSITE_PATTERNS); IPR000242 (PROSITE_PROFILES); IPR000387 (PROSITE_PROFILES); IPR029021 (SUPERFAMILY)                                                                                                                                                                                                                                                                                                        |
| 1279 | 280396_length_719_cvg_11.8_tip_1_1 | 85   | protein them6                                    | 240 | 7.53E-25  | 55.30% | 0.137   | PF13279 (PFAM); IPR029069 (G3DSA:3.10.129.GENE3D); PTHR12475 (PANTHER); IPR029069 (SUPERFAMILY)                                                                                                                                                                                                                                                                                                                                                                                                                                                                                       |
| 1280 | 280500_length_720_cvg_4.0_tip_1_3  | 33   | protein tag-53                                   | 240 | 6.40E-66  | 58.50% | 0.113   | IPR016201 (SMART); IPR015915 (G3DSA:2.120.10.GENE3D); IPR002165 (PFAM); PF13854 (PFAM); PTHR10574 (PANTHER); PTHR10574:SF3 (PANTHER); SSF117281 (SUPERFAMILY)                                                                                                                                                                                                                                                                                                                                                                                                                         |
| 1281 | 280550_length_721_cvg_3.0_tip_1_5  | 34   | probable gpi-anchored adhesin-like protein pga55 | 240 | 3.07E-57  | 75.00% | 0.144   | IPR001478 (SMART); IPR001478 (PFAM); IPR001478 (G3DSA:2.30.42.GENE3D); PTHR11324 (PANTHER); IPR001478 (PROSITE_PROFILES); IPR001478 (SUPERFAMILY)                                                                                                                                                                                                                                                                                                                                                                                                                                     |

|      |                                    |     |                                                               |     |           |        |         |                                                                                                                                                                                                                                                                                                                                                                                                                                                                                                           |
|------|------------------------------------|-----|---------------------------------------------------------------|-----|-----------|--------|---------|-----------------------------------------------------------------------------------------------------------------------------------------------------------------------------------------------------------------------------------------------------------------------------------------------------------------------------------------------------------------------------------------------------------------------------------------------------------------------------------------------------------|
| 1282 | 280568_length_722_cvg_8.6_tip_1_1  | 84  | receptor-type tyrosine-protein phosphatase f-like isoform x1  | 241 | 5.97E-48  | 70.70% | 0.138   | IPR000242 (PRINTS); IPR000242 (SMART); IPR029021 (G3DSA:3.90.190.GENE3D); IPR000242 (PFAM); PTHR19134 (PANTHER); CYTOPLASMIC_DOMAIN (PHOBIUS); NON_CYTOPLASMIC_DOMAIN (PHOBIUS); TRANSMEMBRANE (PHOBIUS); IPR000242 (PROSITE_PROFILES); IPR029021 (SUPERFAMILY); TMhelix (TMHMM)                                                                                                                                                                                                                          |
| 1283 | 280648_length_723_cvg_3.2_tip_1_4  | 34  | glucose dehydrogenase                                         | 241 | 4.63E-54  | 65.10% | 0.161   | IPR007867 (PFAM); IPR000172 (PFAM); G3DSA:3.30.560.10 (GENE3D); G3DSA:3.50.50.60 (GENE3D); PTHR11552 (PANTHER); PTHR11552:SF77 (PANTHER); SSF54373 (SUPERFAMILY); SSF51905 (SUPERFAMILY)                                                                                                                                                                                                                                                                                                                  |
| 1284 | 280670_length_723_cvg_4.2_tip_1_3  | 35  | interleukin-1 receptor-associated kinase 4                    | 241 | 1.19E-86  | 69.50% | 0.106   | IPR002290 (SMART); G3DSA:3.30.200.20 (GENE3D); G3DSA:1.10.510.10 (GENE3D); IPR000719 (PFAM); PTHR24420 (PANTHER); IPR017441 (PROSITE_PATTERNS); IPR008271 (PROSITE_PATTERNS); IPR000719 (PROSITE_PROFILES); IPR011009 (SUPERFAMILY)                                                                                                                                                                                                                                                                       |
| 1285 | 280696_length_724_cvg_10.6_tip_1_4 | 87  | coiled-coil domain-containing protein partial                 | 241 | 3.12E-15  | 50.20% | 0.113   | SignalP-TM (SIGNALP_GRAM_POSITIVE)                                                                                                                                                                                                                                                                                                                                                                                                                                                                        |
| 1286 | 280706_length_724_cvg_6.0_tip_1_4  | 53  | protein disulfide-isomerase a6                                | 241 | 2.16E-83  | 74.30% | 0.251   | PR00421 (PRINTS); IPR012336 (G3DSA:3.40.30.GENE3D); IPR005788 (TIGRFAM); IPR013766 (PFAM); PTHR18929:SF38 (PANTHER); PTHR18929 (PANTHER); IPR017937 (PROSITE_PATTERNS); IPR017937 (PROSITE_PATTERNS); CYTOPLASMIC_DOMAIN (PHOBIUS); TRANSMEMBRANE (PHOBIUS); NON_CYTOPLASMIC_DOMAIN (PHOBIUS); IPR012336 (PROSITE_PROFILES); IPR012336 (SUPERFAMILY); IPR012336 (SUPERFAMILY)                                                                                                                             |
| 1287 | 280712_length_724_cvg_4.3_tip_1_4  | 38  | serine protease easter                                        | 241 | 2.71E-37  | 60.30% | 0.103   | IPR001314 (PRINTS); IPR001254 (SMART); IPR001254 (PFAM); G3DSA:2.40.10.10 (GENE3D); PTHR24268 (PANTHER); IPR018114 (PROSITE_PATTERNS); IPR001254 (PROSITE_PROFILES); IPR009003 (SUPERFAMILY)                                                                                                                                                                                                                                                                                                              |
| 1289 | 280726_length_724_cvg_4.0_tip_1_4  | 40  | carboxypeptidase b                                            | 241 | 1.03E-97  | 68.20% | 0.15    | IPR000834 (SMART); IPR000834 (PFAM); G3DSA:3.40.630.10 (GENE3D); PTHR11705 (PANTHER); SSF53187 (SUPERFAMILY)                                                                                                                                                                                                                                                                                                                                                                                              |
| 1290 | 280800_length_725_cvg_4.0_tip_1_2  | 35  | tyrosine-protein kinase hopscotch                             | 241 | 2.43E-79  | 67.20% | 0.108   | IPR001245 (PRINTS); IPR020635 (SMART); IPR016253 (PIRSF); IPR001245 (PFAM); G3DSA:3.30.200.20 (GENE3D); G3DSA:1.10.510.10 (GENE3D); PTHR24418 (PANTHER); IPR008266 (PROSITE_PATTERNS); IPR000719 (PROSITE_PROFILES); IPR011009 (SUPERFAMILY)                                                                                                                                                                                                                                                              |
| 1288 | 280716_length_724_cvg_33.4_tip_1_0 | 265 | adp-ribosylation factor 2                                     | 242 | 3.69E-105 | 95.80% | 0.115   | IPR006689 (PRINTS); IPR024156 (SMART); IPR006687 (SMART); IPR005225 (TIGRFAM); IPR006689 (PFAM); IPR027417 (G3DSA:3.40.50.GENE3D); PTHR11711:SF153 (PANTHER); PTHR11711 (PANTHER); IPR024156 (PROSITE_PROFILES); IPR027417 (SUPERFAMILY)                                                                                                                                                                                                                                                                  |
| 1291 | 280838_length_726_cvg_11.0_tip_1_5 | 80  | hypoxia up-regulated protein 1 isoform x1                     | 242 | 1.08E-95  | 80.30% | 0.303   | IPR013126 (PRINTS); G3DSA:3.30.30.30 (GENE3D); G3DSA:3.30.420.40 (GENE3D); IPR013126 (PFAM); PTHR19375 (PANTHER); PTHR19375:SF90 (PANTHER); SSF53067 (SUPERFAMILY)                                                                                                                                                                                                                                                                                                                                        |
| 1292 | 280880_length_727_cvg_59.2_tip_0_3 | 632 | low quality protein: mucin-19                                 | 243 | 6.57E-16  | 43.20% | 0.133   | SignalP-TM (SIGNALP_GRAM_POSITIVE)                                                                                                                                                                                                                                                                                                                                                                                                                                                                        |
| 1293 | 280924_length_727_cvg_12.1_tip_1_0 | 128 | membrane metallo-endopeptidase-like 1-like                    | 243 | 2.35E-27  | 54.10% | 0.151   | IPR008753 (PFAM); G3DSA:1.10.1380.10 (GENE3D); IPR000718 (PANTHER); NON_CYTOPLASMIC_DOMAIN (PHOBIUS); CYTOPLASMIC_DOMAIN (PHOBIUS); TRANSMEMBRANE (PHOBIUS); SSF55486 (SUPERFAMILY); TMhelix (TMHMM)                                                                                                                                                                                                                                                                                                      |
| 1294 | 280974_length_728_cvg_7.2_tip_1_3  | 81  | ankyrin repeat and mynd domain-containing protein 2           | 243 | 1.90E-91  | 71.60% | 0.099   | IPR002110 (SMART); IPR020683 (G3DSA:1.25.40.GENE3D); IPR020683 (PFAM); PTHR24150 (PANTHER); IPR002110 (PROSITE_PROFILES); IPR002110 (PROSITE_PROFILES); IPR020683 (PROSITE_PROFILES); IPR020683 (SUPERFAMILY)                                                                                                                                                                                                                                                                                             |
| 1295 | 281142_length_731_cvg_57.0_tip_1_3 | 693 | granulins- partial                                            | 244 | 4.22E-36  | 53.10% | 0.552 Y | IPR000118 (SMART); IPR000118 (PFAM); PTHR12274 (PANTHER); PTHR12274:SF1 (PANTHER); IPR000118 (PROSITE_PATTERNS); IPR000118 (PROSITE_PATTERNS); TRANSMEMBRANE (PHOBIUS); NON_CYTOPLASMIC_DOMAIN (PHOBIUS); CYTOPLASMIC_DOMAIN (PHOBIUS); SignalP-noTM (SIGNALP_EUK); SSF57277 (SUPERFAMILY); SSF57277 (SUPERFAMILY); TMhelix (TMHMM)                                                                                                                                                                       |
| 1296 | 281144_length_731_cvg_31.0_tip_1_3 | 286 | protein twin sister of ft                                     | 244 | 1.93E-24  | 59.50% | 0.164   | IPR008914 (PFAM); IPR008914 (G3DSA:3.90.280.GENE3D); PTHR11362 (PANTHER); IPR001858 (PROSITE_PATTERNS); NON_CYTOPLASMIC_DOMAIN (PHOBIUS); CYTOPLASMIC_DOMAIN (PHOBIUS); TRANSMEMBRANE (PHOBIUS); IPR008914 (SUPERFAMILY)                                                                                                                                                                                                                                                                                  |
| 1297 | 281254_length_733_cvg_6.2_tip_1_1  | 59  | fat-like cadherin-related tumor suppressor homolog isoform x3 | 244 | 6.25E-88  | 70.90% | 0.101   | IPR001881 (SMART); IPR000742 (SMART); G3DSA:2.10.25.10 (GENE3D); IPR001881 (PFAM); G3DSA:2.10.25.10 (GENE3D); PTHR24026 (PANTHER); PTHR24026:SF39 (PANTHER); IPR000152 (PROSITE_PATTERNS); IPR018097 (PROSITE_PATTERNS); IPR013032 (PROSITE_PATTERNS); NON_CYTOPLASMIC_DOMAIN (PHOBIUS); TRANSMEMBRANE (PHOBIUS); CYTOPLASMIC_DOMAIN (PHOBIUS); IPR000742 (PROSITE_PROFILES); IPR000742 (PROSITE_PROFILES); IPR000742 (PROSITE_PROFILES); SSF57196 (SUPERFAMILY); SSF57196 (SUPERFAMILY); TMhelix (TMHMM) |

|      |                                    |      |                                                         |     |           |        |         |                                                                                                                                                                                                                                                                                                                                                                                                                |
|------|------------------------------------|------|---------------------------------------------------------|-----|-----------|--------|---------|----------------------------------------------------------------------------------------------------------------------------------------------------------------------------------------------------------------------------------------------------------------------------------------------------------------------------------------------------------------------------------------------------------------|
| 1298 | 281370_length_736_cvg_10.7_tip_1_2 | 97   | aael007448- partial                                     | 245 | 1.77E-57  | 72.00% | 0.105   | IPR029058 (G3DSA:3.40.50.GENE3D); IPR001375 (PFAM); PTHR11731 (PANTHER); PTHR11731:SF103 (PANTHER); IPR029058 (SUPERFAMILY)                                                                                                                                                                                                                                                                                    |
| 1299 | 281374_length_736_cvg_3.1_tip_1_2  | 38   | cadherin-related family member partial                  | 245 | 7.28E-18  | 50.70% | 0.101   | IPR002126 (PRINTS); IPR002126 (SMART); IPR002126 (PFAM); IPR002126 (G3DSA:2.60.40.GENE3D); IPR002126 (G3DSA:2.60.40.GENE3D); PTHR24027 (PANTHER); IPR002126 (PROSITE_PROFILES); IPR002126 (PROSITE_PROFILES); IPR015919 (SUPERFAMILY); IPR015919 (SUPERFAMILY)                                                                                                                                                 |
| 1301 | 281410_length_736_cvg_2.8_tip_1_1  | 31   | lysosomal alpha-glucosidase-like                        | 245 | 8.69E-41  | 60.90% | 0.118   | PTHR22762 (PANTHER); PTHR22762:SF7 (PANTHER); TRANSMEMBRANE (PHOBIUS); TRANSMEMBRANE (PHOBIUS); CYTOPLASMIC_DOMAIN (PHOBIUS); NON_CYTOPLASMIC_DOMAIN (PHOBIUS); CYTOPLASMIC_DOMAIN (PHOBIUS); TMhelix (TMHMM); TMhelix (TMHMM)                                                                                                                                                                                 |
| 1300 | 281388_length_736_cvg_4.4_tip_1_0  | 42   | multiple pdz domain                                     | 246 | 1.35E-56  | 61.20% | 0.148   | IPR001478 (SMART); IPR001478 (PFAM); IPR001478 (G3DSA:2.30.42.GENE3D); IPR001478 (G3DSA:2.30.42.GENE3D); PTHR19964 (PANTHER); PTHR19964:SF34 (PANTHER); IPR001478 (PROSITE_PROFILES); IPR001478 (PROSITE_PROFILES); IPR001478 (SUPERFAMILY); IPR001478 (SUPERFAMILY)                                                                                                                                           |
| 1302 | 281486_length_738_cvg_64.1_tip_1_1 | 1935 | 14-3-3 protein zeta isoform x1                          | 246 | 8.18E-139 | 96.00% | 0.122   | Coil (COILS); IPR000308 (PRINTS); IPR023410 (SMART); IPR023410 (PFAM); G3DSA:1.20.190.20 (GENE3D); IPR000308 (PIRSF); IPR000308 (PANTHER); IPR023409 (PROSITE_PATTERNS); IPR023410 (SUPERFAMILY)                                                                                                                                                                                                               |
| 1303 | 281500_length_738_cvg_3.0_tip_1_0  | 25   | sh3 and multiple ankyrin repeat domains protein partial | 246 | 2.65E-125 | 87.80% | 0.142   | IPR002110 (SMART); IPR020683 (PFAM); IPR020683 (G3DSA:1.25.40.GENE3D); PTHR24135 (PANTHER); IPR002110 (PROSITE_PROFILES); IPR002110 (PROSITE_PROFILES); IPR020683 (PROSITE_PROFILES); IPR020683 (SUPERFAMILY)                                                                                                                                                                                                  |
| 1304 | 281580_length_739_cvg_5.0_tip_1_1  | 47   | dehydrogenase reductase sdr family member 11-like       | 246 | 1.78E-12  | 72.00% | 0.106   | PTHR24322 (PANTHER); PTHR24322:SF310 (PANTHER)                                                                                                                                                                                                                                                                                                                                                                 |
| 1306 | 281614_length_740_cvg_6.9_tip_1_5  | 74   | 3-hydroxybutyrate dehydrogenase type 2                  | 246 | 1.18E-87  | 84.30% | 0.114   | IPR002347 (PRINTS); IPR002198 (PRINTS); PF13561 (PFAM); IPR016040 (G3DSA:3.40.50.GENE3D); PTHR24321 (PANTHER); PTHR24321:SF3 (PANTHER); IPR020904 (PROSITE_PATTERNS); TRANSMEMBRANE (PHOBIUS); CYTOPLASMIC_DOMAIN (PHOBIUS); NON_CYTOPLASMIC_DOMAIN (PHOBIUS); SSF51735 (SUPERFAMILY); TMhelix (TMHMM)                                                                                                         |
| 1308 | 281634_length_740_cvg_5.4_tip_1_2  | 44   | zinc finger protein 726                                 | 246 | 3.04E-37  | 66.30% | 0.105   | IPR015880 (SMART); IPR013087 (G3DSA:3.30.160.GENE3D); PF13465 (PFAM); PF13912 (PFAM); IPR013087 (G3DSA:3.30.160.GENE3D); PTHR24409 (PANTHER); IPR007087 (PROSITE_PATTERNS); IPR007087 (PROSITE_PATTERNS); IPR007087 (PROSITE_PATTERNS); IPR007087 (PROSITE_PROFILES); IPR007087 (PROSITE_PROFILES); IPR007087 (PROSITE_PROFILES); IPR007087 (PROSITE_PROFILES); SSF57667 (SUPERFAMILY); SSF57667 (SUPERFAMILY) |
| 1305 | 281586_length_739_cvg_59.2_tip_1_3 | 903  | pacifastin light chain                                  | 247 | 1.04E-16  | 51.00% | 0.425 Y | IPR008037 (PFAM); TRANSMEMBRANE (PHOBIUS); NON_CYTOPLASMIC_DOMAIN (PHOBIUS); CYTOPLASMIC_DOMAIN (PHOBIUS); IPR020862 (PROSITE_PROFILES); IPR020862 (PROSITE_PROFILES); IPR020862 (PROSITE_PROFILES); IPR008037 (SUPERFAMILY); IPR008037 (SUPERFAMILY); IPR008037 (SUPERFAMILY); TMhelix (TMHMM)                                                                                                                |
| 1307 | 281624_length_740_cvg_55.0_tip_1_0 | 687  | ras-related protein rab-1a                              | 247 | 3.18E-134 | 94.30% | 0.178   | IPR001806 (PRINTS); IPR003579 (SMART); IPR003578 (SMART); IPR020849 (SMART); IPR002041 (SMART); IPR024156 (SMART); IPR027417 (G3DSA:3.40.50.GENE3D); IPR005225 (TIGRFAM); IPR001806 (PFAM); PTHR24073 (PANTHER); PTHR24073:SF455 (PANTHER); PS51419 (PROSITE_PROFILES); IPR027417 (SUPERFAMILY)                                                                                                                |
| 1309 | 281782_length_743_cvg_3.0_tip_1_4  | 29   | acyl- -binding domain-containing protein 5 isoform x3   | 248 | 2.43E-39  | 65.90% | 0.128   | IPR000582 (PRINTS); IPR000582 (PFAM); IPR014352 (G3DSA:1.20.80.GENE3D); PTHR23310:SF14 (PANTHER); PTHR23310 (PANTHER); IPR000582 (PROSITE_PROFILES); IPR000582 (SUPERFAMILY)                                                                                                                                                                                                                                   |
| 1310 | 281810_length_744_cvg_4.0_tip_1_3  | 37   | cyclin-g-associated kinase-like                         | 248 | 4.89E-101 | 79.90% | 0.159   | IPR002290 (SMART); IPR000719 (PFAM); G3DSA:3.30.200.20 (GENE3D); G3DSA:1.10.510.10 (GENE3D); PTHR23172 (PANTHER); PTHR23172:SF19 (PANTHER); IPR008271 (PROSITE_PATTERNS); IPR000719 (PROSITE_PROFILES); IPR011009 (SUPERFAMILY)                                                                                                                                                                                |
| 1311 | 281824_length_744_cvg_95.4_tip_0_3 | 2633 | blastula protease 10-like                               | 248 | 9.34E-33  | 50.40% | 0.158   | IPR000859 (SMART); IPR000859 (G3DSA:2.60.120.GENE3D); IPR001506 (PFAM); IPR000859 (PFAM); IPR024079 (G3DSA:3.40.390.GENE3D); PTHR10127 (PANTHER); PTHR10127:SF580 (PANTHER); IPR000859 (PROSITE_PROFILES); IPR000859 (SUPERFAMILY)                                                                                                                                                                             |

|      |                                    |      |                                                 |     |           |        |         |                                                                                                                                                                                                                                                                                                                                                                                                                                                                                                                                                                                                                                                                        |
|------|------------------------------------|------|-------------------------------------------------|-----|-----------|--------|---------|------------------------------------------------------------------------------------------------------------------------------------------------------------------------------------------------------------------------------------------------------------------------------------------------------------------------------------------------------------------------------------------------------------------------------------------------------------------------------------------------------------------------------------------------------------------------------------------------------------------------------------------------------------------------|
| 1312 | 281826_length_744_cvg_2.0_tip_1_3  | 22   | gastrula zinc finger protein - partial          | 248 | 2.16E-48  | 54.00% | 0.145   | IPR015880 (SMART); PF13912 (PFAM); IPR013087 (G3DSA:3.30.160.GENE3D); PF13894 (PFAM); IPR013087 (G3DSA:3.30.160.GENE3D); IPR013087 (G3DSA:3.30.160.GENE3D); IPR013087 (G3DSA:3.30.160.GENE3D); IPR007087 (PFAM); PF13465 (PFAM); PTHR24409 (PANTHER); IPR007087 (PROSITE_PATTERNS); IPR007087 (PROSITE_PATTERNS); IPR007087 (PROSITE_PATTERNS); IPR007087 (PROSITE_PATTERNS); IPR007087 (PROSITE_PATTERNS); IPR007087 (PROSITE_PROFILES); IPR007087 (PROSITE_PROFILES); IPR007087 (PROSITE_PROFILES); IPR007087 (PROSITE_PROFILES); IPR007087 (PROSITE_PROFILES); IPR007087 (PROSITE_PROFILES); SSF57667 (SUPERFAMILY); SSF57667 (SUPERFAMILY); SSF57667 (SUPERFAMILY) |
| 1313 | 281858_length_745_cvg_4.4_tip_1_0  | 50   | ---NA---                                        | 249 |           |        | 0.105   | IPR002172 (SMART); IPR002172 (PFAM); IPR002172 (G3DSA:4.10.400.GENE3D); IPR002172 (PROSITE_PROFILES); IPR003609 (PROSITE_PROFILES); IPR003609 (PROSITE_PROFILES); IPR002172 (SUPERFAMILY)                                                                                                                                                                                                                                                                                                                                                                                                                                                                              |
| 1314 | 281878_length_746_cvg_2.7_tip_1_4  | 36   | zinc finger                                     | 249 | 9.19E-29  | 58.10% | 0.133   | IPR015880 (SMART); IPR013087 (G3DSA:3.30.160.GENE3D); IPR013087 (G3DSA:3.30.160.GENE3D); PF13912 (PFAM); PF13465 (PFAM); IPR007087 (PFAM); PTHR24409 (PANTHER); PTHR24409:SF14 (PANTHER); IPR007087 (PROSITE_PATTERNS); IPR007087 (PROSITE_PATTERNS); IPR007087 (PROSITE_PATTERNS); IPR007087 (PROSITE_PATTERNS); IPR007087 (PROSITE_PATTERNS); IPR007087 (PROSITE_PROFILES); IPR007087 (PROSITE_PROFILES); IPR007087 (PROSITE_PROFILES); IPR007087 (PROSITE_PROFILES); IPR007087 (PROSITE_PROFILES); IPR007087 (PROSITE_PROFILES); SSF57667 (SUPERFAMILY); SSF57667 (SUPERFAMILY); SSF57667 (SUPERFAMILY)                                                             |
| 1315 | 281924_length_746_cvg_6.8_tip_1_3  | 60   | galectin partial                                | 249 | 1.12E-60  | 69.70% | 0.098   | IPR001079 (SMART); IPR001079 (SMART); IPR001079 (PFAM); IPR013320 (G3DSA:2.60.120.GENE3D); PTHR11346 (PANTHER); IPR001079 (PROSITE_PROFILES); IPR013320 (SUPERFAMILY)                                                                                                                                                                                                                                                                                                                                                                                                                                                                                                  |
| 1316 | 281972_length_748_cvg_2.9_tip_1_1  | 29   | hypothetical protein                            | 249 | 6.15E-11  | 45.00% | 0.125   | no IPS match                                                                                                                                                                                                                                                                                                                                                                                                                                                                                                                                                                                                                                                           |
| 1317 | 281972_length_748_cvg_2.9_tip_1_4  | 29   | tachykinins isoform x1                          | 249 | 2.14E-41  | 54.20% | 0.118   | no IPS match                                                                                                                                                                                                                                                                                                                                                                                                                                                                                                                                                                                                                                                           |
| 1318 | 282054_length_749_cvg_72.8_tip_0_3 | 3764 | hypothetical protein BRAFLDRAFT_77844           | 250 | 7.20E-47  | 55.60% | 0.149   | IPR001547 (PFAM); IPR013781 (G3DSA:3.20.20.GENE3D); PTHR31308 (PANTHER); IPR017853 (SUPERFAMILY)                                                                                                                                                                                                                                                                                                                                                                                                                                                                                                                                                                       |
| 1319 | 282090_length_750_cvg_67.4_tip_1_4 | 1503 | hemagglutinin amebocyte aggregation factor-like | 250 | 2.58E-39  | 61.40% | 0.116   | PF14704 (PFAM); IPR026645 (PANTHER); NON_CYTOPLASMIC_DOMAIN (PHOBIUS); TRANSMEMBRANE (PHOBIUS); CYTOPLASMIC_DOMAIN (PHOBIUS); TMhelix (TMHMM)                                                                                                                                                                                                                                                                                                                                                                                                                                                                                                                          |
| 1320 | 282098_length_750_cvg_2.0_tip_1_2  | 20   | variable lymphocyte receptor a                  | 250 | 2.85E-10  | 51.10% | 0.116   | IPR003591 (SMART); SM00364 (SMART); G3DSA:3.80.10.10 (GENE3D); IPR001611 (PFAM); IPR001611 (PFAM); PTHR24365 (PANTHER); IPR001611 (PROSITE_PROFILES); SSF52058 (SUPERFAMILY)                                                                                                                                                                                                                                                                                                       |
| 1321 | 282162_length_751_cvg_15.9_tip_1_4 | 154  | ribosome biogenesis protein wdr12 homolog       | 250 | 2.77E-89  | 71.50% | 0.103   | IPR001680 (SMART); IPR012972 (PFAM); IPR001680 (PFAM); IPR015943 (G3DSA:2.130.10.GENE3D); PTHR19855 (PANTHER); IPR017986 (PROSITE_PROFILES); IPR001680 (PROSITE_PROFILES); IPR017986 (SUPERFAMILY)                                                                                                                                                                                                                                                                                                                                                                                                                                                                     |
| 1322 | 282216_length_753_cvg_62.0_tip_1_3 | 1433 | kazal-type serine proteinase inhibitor 3        | 251 | 3.29E-24  | 56.90% | 0.572 Y | IPR002350 (SMART); G3DSA:3.30.60.30 (GENE3D); IPR002350 (PFAM); G3DSA:3.30.60.30 (GENE3D); IPR002350 (PFAM); PTHR10913:SF46 (PANTHER); PTHR10913 (PANTHER); TRANSMEMBRANE (PHOBIUS); CYTOPLASMIC_DOMAIN (PHOBIUS); NON_CYTOPLASMIC_DOMAIN (PHOBIUS); NON_CYTOPLASMIC_DOMAIN (PHOBIUS); CYTOPLASMIC_DOMAIN (PHOBIUS); TRANSMEMBRANE (PHOBIUS); TRANSMEMBRANE (PHOBIUS); IPR002350 (PROSITE_PROFILES); IPR002350 (PROSITE_PROFILES); SignalP-TM (SIGNALP_EUK); SSF100895 (SUPERFAMILY); SSF100895 (SUPERFAMILY); TMhelix (TMHMM); TMhelix (TMHMM); TMhelix (TMHMM)                                                                                                       |
| 1323 | 282228_length_753_cvg_5.7_tip_1_2  | 50   | myosin light chain                              | 251 | 1.60E-100 | 76.00% | 0.108   | IPR003599 (SMART); IPR013783 (G3DSA:2.60.40.GENE3D); IPR013783 (G3DSA:2.60.40.GENE3D); PF13895 (PFAM); IPR013098 (PFAM); PTHR19897 (PANTHER); IPR007110 (PROSITE_PROFILES); IPR007110 (PROSITE_PROFILES); IPR007110 (PROSITE_PROFILES); SSF48726 (SUPERFAMILY); SSF48726 (SUPERFAMILY); SSF48726 (SUPERFAMILY)                                                                                                                                                                                                                                                                                                                                                         |
| 1324 | 282234_length_753_cvg_52.2_tip_1_1 | 454  | annexin b10-like                                | 251 | 8.53E-84  | 69.70% | 0.103   | IPR001464 (PRINTS); IPR018502 (SMART); IPR018502 (PFAM); IPR018502 (G3DSA:1.10.220.GENE3D); IPR018502 (G3DSA:1.10.220.GENE3D); IPR018502 (G3DSA:1.10.220.GENE3D); PTHR10502 (PANTHER); IPR018252 (PROSITE_PATTERNS); SSF47874 (SUPERFAMILY)                                                                                                                                                                                                                                                                                                                                                                                                                            |

|      |                                    |       |                                                   |     |           |        |         |                                                                                                                                                                                                                                                                                                                                                                                                                                                                                                                                                                              |
|------|------------------------------------|-------|---------------------------------------------------|-----|-----------|--------|---------|------------------------------------------------------------------------------------------------------------------------------------------------------------------------------------------------------------------------------------------------------------------------------------------------------------------------------------------------------------------------------------------------------------------------------------------------------------------------------------------------------------------------------------------------------------------------------|
| 1326 | 282324_length_754_cvg_4.8_tip_1_5  | 47    | cuticlin- partial                                 | 251 | 3.31E-133 | 81.80% | 0.109   | IPR001507 (SMART); IPR001507 (PFAM); PTHR22907:SF1 (PANTHER); PTHR22907 (PANTHER); IPR001507 (PROSITE_PROFILES)                                                                                                                                                                                                                                                                                                                                                                                                                                                              |
| 1325 | 282276_length_754_cvg_2.1_tip_1_3  | 24    | gamma-aminobutyric acid type b receptor subunit 1 | 252 | 8.53E-134 | 86.60% | 0.223   | PR01176 (PRINTS); IPR002456 (PRINTS); IPR017978 (PFAM); IPR002455 (PANTHER); PTHR10519:SF3 (PANTHER); TRANSMEMBRANE (PHOBIUS); NON_CYTOPLASMIC_DOMAIN (PHOBIUS); TRANSMEMBRANE (PHOBIUS); NON_CYTOPLASMIC_DOMAIN (PHOBIUS); TRANSMEMBRANE (PHOBIUS); TRANSMEMBRANE (PHOBIUS); CYTOPLASMIC_DOMAIN (PHOBIUS); NON_CYTOPLASMIC_DOMAIN (PHOBIUS); CYTOPLASMIC_DOMAIN (PHOBIUS); TRANSMEMBRANE (PHOBIUS); CYTOPLASMIC_DOMAIN (PHOBIUS); TRANSMEMBRANE (PHOBIUS); CYTOPLASMIC_DOMAIN (PHOBIUS); TMhelix (TMHMM); TMhelix (TMHMM); TMhelix (TMHMM); TMhelix (TMHMM)                 |
| 1327 | 282388_length_756_cvg_55.3_tip_1_1 | 1503  | apolipoprotein d-like                             | 252 | 5.13E-14  | 46.10% | 0.438 Y | IPR000566 (PFAM); IPR012674 (G3DSA:2.40.128.GENE3D); PTHR10612 (PANTHER); PTHR10612:SF10 (PANTHER); IPR011038 (SUPERFAMILY)                                                                                                                                                                                                                                                                                                                                                                                                                                                  |
| 1328 | 282460_length_757_cvg_4.0_tip_1_2  | 38    | receptor-type tyrosine-protein phosphatase kappa  | 252 | 1.87E-94  | 74.40% | 0.208   | IPR000242 (PRINTS); IPR000242 (SMART); IPR000242 (PFAM); IPR029021 (G3DSA:3.90.190.GENE3D); PTHR19134:SF252 (PANTHER); PTHR19134 (PANTHER); CYTOPLASMIC_DOMAIN (PHOBIUS); TRANSMEMBRANE (PHOBIUS); NON_CYTOPLASMIC_DOMAIN (PHOBIUS); IPR000242 (PROSITE_PROFILES); IPR029021 (SUPERFAMILY); TMhelix (TMHMM)                                                                                                                                                                                                                                                                  |
| 1329 | 282484_length_758_cvg_6.0_tip_1_0  | 58    | l-xylulose reductase                              | 253 | 2.67E-92  | 78.50% | 0.112   | IPR002198 (PRINTS); IPR002347 (PRINTS); IPR016040 (G3DSA:3.40.50.GENE3D); PF13561 (PFAM); PTHR24311:SF6 (PANTHER); PTHR24311 (PANTHER); IPR020904 (PROSITE_PATTERNS); SSF51735 (SUPERFAMILY)                                                                                                                                                                                                                                                                                                                                                                                 |
| 1330 | 282492_length_758_cvg_66.5_tip_1_3 | 1104  | af425264_1lysozyme precursor                      | 253 | 2.80E-46  | 63.90% | 0.132   | IPR001916 (PRINTS); IPR000974 (PRINTS); IPR001916 (SMART); G3DSA:1.10.530.10 (GENE3D); IPR001916 (PFAM); PTHR11407 (PANTHER); IPR019799 (PROSITE_PATTERNS); NON_CYTOPLASMIC_DOMAIN (PHOBIUS); CYTOPLASMIC_DOMAIN (PHOBIUS); TRANSMEMBRANE (PHOBIUS); IPR001916 (PROSITE_PROFILES); IPR023346 (SUPERFAMILY)                                                                                                                                                                                                                                                                   |
| 1331 | 282494_length_758_cvg_3.0_tip_1_3  | 32    | 3-hydroxyisobutyrate dehydrogenase                | 253 | 1.10E-113 | 85.30% | 0.134   | IPR029154 (PFAM); IPR006115 (PFAM); IPR013328 (G3DSA:1.10.1040.GENE3D); IPR011548 (TIGRFAM); IPR015815 (PIRSF); IPR016040 (G3DSA:3.40.50.GENE3D); PTHR22981:SF51 (PANTHER); PTHR22981 (PANTHER); IPR008927 (SUPERFAMILY); SSF51735 (SUPERFAMILY)                                                                                                                                                                                                                                                                                                                             |
| 1334 | 282648_length_761_cvg_75.0_tip_1_2 | 15917 | trypsinogen 2                                     | 253 | 8.60E-99  | 72.90% | 0.816 Y | IPR001314 (PRINTS); IPR001254 (SMART); G3DSA:2.40.10.10 (GENE3D); G3DSA:2.40.10.10 (GENE3D); IPR001254 (PFAM); G3DSA:2.40.10.10 (GENE3D); PTHR24276 (PANTHER); IPR018114 (PROSITE_PATTERNS); IPR018114 (PROSITE_PATTERNS); NON_CYTOPLASMIC_DOMAIN (PHOBIUS); SIGNAL_PEPTIDE (PHOBIUS); SIGNAL_PEPTIDE_C_REGION (PHOBIUS); SIGNAL_PEPTIDE_N_REGION (PHOBIUS); SIGNAL_PEPTIDE_H_REGION (PHOBIUS); IPR001254 (PROSITE_PROFILES); SignalP-TM (SIGNALP_GRAM_POSITIVE); SignalP-noTM (SIGNALP_GRAM_NEGATIVE); SignalP-noTM (SIGNALP_EUK); IPR009003 (SUPERFAMILY); TMhelix (TMHMM) |
| 1336 | 282660_length_761_cvg_13.3_tip_1_5 | 150   | slit homolog 1                                    | 253 | 1.61E-51  | 67.10% | 0.271   | IPR003591 (SMART); IPR001611 (PFAM); IPR001611 (PFAM); G3DSA:3.80.10.10 (GENE3D); PTHR24373 (PANTHER); PTHR24373:SF98 (PANTHER); SSF52058 (SUPERFAMILY)                                                                                                                                                                                                                                                                                                                                                                                                                      |
| 1332 | 282606_length_760_cvg_10.1_tip_1_3 | 95    | peptidyl-prolyl cis-trans isomerase-like 3        | 254 | 1.69E-97  | 91.00% | 0.145   | IPR002130 (PRINTS); IPR002130 (PFAM); IPR029000 (G3DSA:2.40.100.GENE3D); IPR024936 (PANTHER); IPR020892 (PROSITE_PATTERNS); IPR002130 (PROSITE_PROFILES); IPR029000 (SUPERFAMILY)                                                                                                                                                                                                                                                                                                                                                                                            |
| 1333 | 282608_length_760_cvg_8.8_tip_1_3  | 96    | hemocytin isoform x2                              | 254 | 1.85E-08  | 43.20% | 0.109   | IPR014853 (PFAM); IPR001846 (PROSITE_PROFILES)                                                                                                                                                                                                                                                                                                                                                                                                                                                                                                                               |
| 1335 | 282656_length_761_cvg_3.0_tip_1_0  | 33    | sialate o-acetyltransferase isoform x1            | 254 | 2.89E-70  | 60.10% | 0.338   | IPR005181 (PFAM); PTHR22901 (PANTHER); IPR013830 (SUPERFAMILY)                                                                                                                                                                                                                                                                                                                                                                                                                                                                                                               |
| 1337 | 282764_length_763_cvg_2.3_tip_1_4  | 28    | papilin isoform x2                                | 254 | 3.21E-75  | 66.00% | 0.124   | IPR002223 (PRINTS); IPR002223 (SMART); IPR002223 (PFAM); IPR002223 (G3DSA:4.10.410.GENE3D); IPR002223 (G3DSA:4.10.410.GENE3D); PTHR10083 (PANTHER); IPR020901 (PROSITE_PATTERNS); IPR020901 (PROSITE_PATTERNS); IPR002223 (PROSITE_PROFILES); IPR002223 (PROSITE_PROFILES); IPR002223 (PROSITE_PROFILES); IPR002223 (SUPERFAMILY); IPR002223 (SUPERFAMILY); IPR002223 (SUPERFAMILY)                                                                                                                                                                                          |
| 1338 | 282834_length_764_cvg_17.8_tip_1_5 | 164   | epoxide hydrolase 4-like                          | 254 | 8.34E-58  | 67.60% | 0.104   | IPR000639 (PRINTS); IPR000073 (PRINTS); IPR000073 (PFAM); IPR029058 (G3DSA:3.40.50.GENE3D); PTHR10992:SF721 (PANTHER); PTHR10992 (PANTHER); NON_CYTOPLASMIC_DOMAIN (PHOBIUS); CYTOPLASMIC_DOMAIN (PHOBIUS); TRANSMEMBRANE (PHOBIUS); IPR029058 (SUPERFAMILY); TMhelix (TMHMM)                                                                                                                                                                                                                                                                                                |



|      |                                    |      |                                                          |     |           |        |         |                                                                                                                                                                                                                                                                                                                                                                                                                                                                                                                                                                                                                                                                                     |
|------|------------------------------------|------|----------------------------------------------------------|-----|-----------|--------|---------|-------------------------------------------------------------------------------------------------------------------------------------------------------------------------------------------------------------------------------------------------------------------------------------------------------------------------------------------------------------------------------------------------------------------------------------------------------------------------------------------------------------------------------------------------------------------------------------------------------------------------------------------------------------------------------------|
| 1339 | 282860_length_764_cvg_2.0_tip_1_4  | 24   | mitogen-activated protein kinase erk-                    | 255 | 3.00E-145 | 87.10% | 0.107   | IPR002290 (SMART); G3DSA:3.30.200.20 (GENE3D); G3DSA:1.10.510.10 (GENE3D); IPR000719 (PFAM); PTHR24360 (PANTHER); PTHR24360:SF15 (PANTHER); IPR017441 (PROSITE_PATTERNS); IPR008271 (PROSITE_PATTERNS); IPR000719 (PROSITE_PROFILES); IPR011009 (SUPERFAMILY)                                                                                                                                                                                                                                                                                                                                                                                                                       |
| 1340 | 282982_length_767_cvg_15.4_tip_1_4 | 195  | na(+) h(+) exchange regulatory cofactor nhe-rf2          | 256 | 2.30E-56  | 73.60% | 0.161   | IPR001478 (SMART); IPR001478 (PFAM); IPR001478 (G3DSA:2.30.42.GENE3D); PTHR14191 (PANTHER); IPR001478 (PROSITE_PROFILES); IPR001478 (SUPERFAMILY)                                                                                                                                                                                                                                                                                                                                                                                                                                                                                                                                   |
| 1341 | 283054_length_768_cvg_11.0_tip_1_0 | 102  | serpin b3-like                                           | 256 | 8.79E-46  | 53.30% | 0.171   | IPR023796 (SMART); G3DSA:2.30.39.10 (GENE3D); G3DSA:3.30.497.10 (GENE3D); IPR023796 (PFAM); IPR000215 (PANTHER); IPR023796 (SUPERFAMILY)                                                                                                                                                                                                                                                                                                                                                                                                                                                                                                                                            |
| 1343 | 283096_length_769_cvg_65.2_tip_1_2 | 1112 | ferritin                                                 | 256 | 7.28E-86  | 84.70% | 0.726 Y | Coil (COILS); IPR008331 (PFAM); IPR012347 (G3DSA:1.20.1260.GENE3D); IPR001519 (PANTHER); IPR014034 (PROSITE_PATTERNS); IPR014034 (PROSITE_PATTERNS); SIGNAL_PEPTIDE_H_REGION (PHOBIUS); SIGNAL_PEPTIDE_C_REGION (PHOBIUS); NON_CYTOPLASMIC_DOMAIN (PHOBIUS); SIGNAL_PEPTIDE_N_REGION (PHOBIUS); SIGNAL_PEPTIDE (PHOBIUS); IPR009040 (PROSITE_PROFILES); SignalP-noTM (SIGNALP_EUK); IPR009078 (SUPERFAMILY)                                                                                                                                                                                                                                                                         |
| 1342 | 283084_length_769_cvg_22.7_tip_1_0 | 193  | ectonucleoside triphosphate diphosphohydrolase 5-partial | 257 | 1.81E-19  | 81.90% | 0.156   | IPR000407 (PFAM); IPR000407 (PANTHER)                                                                                                                                                                                                                                                                                                                                                                                                                                                                                                                                                                                                                                               |
| 1344 | 283142_length_770_cvg_10.5_tip_1_3 | 129  | pdz domain-containing protein gipc3                      | 257 | 1.22E-141 | 85.80% | 0.11    | IPR001478 (SMART); IPR001478 (G3DSA:2.30.42.GENE3D); IPR001478 (PFAM); PTHR12259 (PANTHER); IPR001478 (PROSITE_PROFILES); IPR001478 (SUPERFAMILY)                                                                                                                                                                                                                                                                                                                                                                                                                                                                                                                                   |
| 1345 | 283236_length_772_cvg_4.7_tip_1_2  | 45   | zinc finger protein 431-like isoform x2                  | 257 | 8.18E-34  | 55.90% | 0.1     | IPR015880 (SMART); PF13912 (PFAM); PF13465 (PFAM); IPR013087 (G3DSA:3.30.160.GENE3D); IPR013087 (G3DSA:3.30.160.GENE3D); IPR013087 (G3DSA:3.30.160.GENE3D); PTHR24409 (PANTHER); IPR007087 (PROSITE_PATTERNS); IPR007087 (PROSITE_PATTERNS); IPR007087 (PROSITE_PATTERNS); IPR007087 (PROSITE_PROFILES); IPR007087 (PROSITE_PROFILES); IPR007087 (PROSITE_PROFILES); IPR007087 (PROSITE_PROFILES); SSF57667 (SUPERFAMILY); SSF57667 (SUPERFAMILY)                                                                                                                                                                                                                                   |
| 1346 | 283428_length_776_cvg_14.7_tip_1_1 | 119  | collagen alpha type                                      | 259 | 5.31E-54  | 70.60% | 0.111   | IPR010515 (PFAM); IPR016186 (G3DSA:3.10.100.GENE3D); PTHR24023:SF461 (PANTHER); PTHR24023 (PANTHER); IPR016187 (SUPERFAMILY)                                                                                                                                                                                                                                                                                                                                                                                                                                                                                                                                                        |
| 1347 | 283462_length_777_cvg_3.8_tip_1_0  | 31   | zinc finger protein 271-like                             | 259 | 2.78E-71  | 66.80% | 0.099   | IPR015880 (SMART); PF13912 (PFAM); IPR013087 (G3DSA:3.30.160.GENE3D); IPR013087 (G3DSA:3.30.160.GENE3D); IPR013087 (G3DSA:3.30.160.GENE3D); PF13465 (PFAM); IPR013087 (G3DSA:3.30.160.GENE3D); IPR013087 (G3DSA:3.30.160.GENE3D); IPR007087 (PFAM); PTHR24409 (PANTHER); IPR007087 (PROSITE_PATTERNS); IPR007087 (PROSITE_PATTERNS); IPR007087 (PROSITE_PATTERNS); IPR007087 (PROSITE_PATTERNS); IPR007087 (PROSITE_PATTERNS); IPR007087 (PROSITE_PATTERNS); IPR007087 (PROSITE_PROFILES); IPR007087 (PROSITE_PROFILES); IPR007087 (PROSITE_PROFILES); IPR007087 (PROSITE_PROFILES); SSF57667 (SUPERFAMILY); SSF57667 (SUPERFAMILY); SSF57667 (SUPERFAMILY); SSF57667 (SUPERFAMILY) |
| 1348 | 283470_length_777_cvg_2.6_tip_1_3  | 26   | heat-shock protein 105                                   | 259 | 8.36E-127 | 81.30% | 0.123   | IPR013126 (PRINTS); IPR013126 (PFAM); G3DSA:3.30.420.40 (GENE3D); G3DSA:3.30.420.40 (GENE3D); G3DSA:3.90.640.10 (GENE3D); PTHR19375 (PANTHER); PTHR19375:SF78 (PANTHER); IPR018181 (PROSITE_PATTERNS); SSF53067 (SUPERFAMILY); SSF53067 (SUPERFAMILY)                                                                                                                                                                                                                                                                                                                                                                                                                               |
| 1384 | 284792_length_807_cvg_6.4_tip_1_1  | 75   | virulence metalloprotease                                | 259 | 1.10E-18  | 54.40% | 0.286   | IPR011096 (PFAM); IPR025711 (PFAM); SIGNAL_PEPTIDE_C_REGION (PHOBIUS); SIGNAL_PEPTIDE (PHOBIUS); CYTOPLASMIC_DOMAIN (PHOBIUS); TRANSMEMBRANE (PHOBIUS); SIGNAL_PEPTIDE_N_REGION (PHOBIUS); SIGNAL_PEPTIDE_H_REGION (PHOBIUS); NON_CYTOPLASMIC_DOMAIN (PHOBIUS); TMhelix (TMHMM)                                                                                                                                                                                                                                                                                                                                                                                                     |
| 1349 | 283644_length_780_cvg_10.8_tip_1_3 | 122  | glutathione peroxidase 7                                 | 260 | 7.44E-76  | 71.80% | 0.12    | IPR000889 (PRINTS); IPR000889 (PFAM); IPR012336 (G3DSA:3.40.30.GENE3D); IPR000889 (PANTHER); PTHR11592:SF10 (PANTHER); IPR029759 (PROSITE_PATTERNS); IPR029760 (PROSITE_PATTERNS); IPR000889 (PROSITE_PROFILES); IPR012336 (SUPERFAMILY); TMhelix (TMHMM)                                                                                                                                                                                                                                                                                                                                                                                                                           |
| 1350 | 283702_length_782_cvg_2.0_tip_1_2  | 25   | glutamate synthase                                       | 260 | 2.96E-143 | 88.70% | 0.102   | PR00419 (PRINTS); PF13450 (PFAM); IPR028261 (PFAM); G3DSA:1.10.1060.10 (GENE3D); G3DSA:3.50.50.60 (GENE3D); PTHR11938 (PANTHER); PTHR11938:SF61 (PANTHER); IPR009051 (SUPERFAMILY); SSF51971 (SUPERFAMILY)                                                                                                                                                                                                                                                                                                                                                                                                                                                                          |



|      |                                    |       |                                                           |     |          |        |         |                                                                                                                                                                                                                                                                                                                                                                                                                                                                                                                                                                                                                                   |
|------|------------------------------------|-------|-----------------------------------------------------------|-----|----------|--------|---------|-----------------------------------------------------------------------------------------------------------------------------------------------------------------------------------------------------------------------------------------------------------------------------------------------------------------------------------------------------------------------------------------------------------------------------------------------------------------------------------------------------------------------------------------------------------------------------------------------------------------------------------|
| 1363 | 284020_length_788_cvg_2.1_tip_1_3  | 22    | asparagine-rich zinc finger protein azf1-like isoform x2  | 263 | 5.63E-65 | 69.00% | 0.107   | IPR015880 (SMART); IPR013087 (G3DSA:3.30.160.GENE3D); PF13465 (PFAM); IPR013087 (G3DSA:3.30.160.GENE3D); IPR007087 (PFAM); IPR013087 (G3DSA:3.30.160.GENE3D); PTHR24409 (PANTHER); IPR007087 (PROSITE_PATTERNS); IPR007087 (PROSITE_PATTERNS); IPR007087 (PROSITE_PATTERNS); IPR007087 (PROSITE_PATTERNS); IPR007087 (PROSITE_PATTERNS); IPR007087 (PROSITE_PATTERNS); IPR007087 (PROSITE_PROFILES); IPR007087 (PROSITE_PROFILES); IPR007087 (PROSITE_PROFILES); IPR007087 (PROSITE_PROFILES); IPR007087 (PROSITE_PROFILES); IPR007087 (PROSITE_PROFILES); SSF57667 (SUPERFAMILY); SSF57667 (SUPERFAMILY); SSF57667 (SUPERFAMILY) |
| 1364 | 284028_length_789_cvg_6.4_tip_1_1  | 62    | insulin-like growth factor binding protein 7-like protein | 263 | 2.79E-08 | 51.80% | 0.636 Y | IPR000867 (SMART); IPR000867 (PFAM); IPR011390 (PANTHER); PTHR14186:SF8 (PANTHER); NON_CYTOPLASMIC_DOMAIN (PHOBIUS); SIGNAL_PEPTIDE (PHOBIUS); SIGNAL_PEPTIDE_C_REGION (PHOBIUS); SIGNAL_PEPTIDE_N_REGION (PHOBIUS); SIGNAL_PEPTIDE_H_REGION (PHOBIUS); IPR000867 (PROSITE_PROFILES); SignalP-noTM (SIGNALP_EUK); IPR009030 (SUPERFAMILY); TMhelix (TMHMM)                                                                                                                                                                                                                                                                        |
| 1365 | 284038_length_789_cvg_60.9_tip_1_1 | 80801 | soma ferritin-like                                        | 263 | 2.07E-74 | 80.50% | 0.113   | IPR012347 (G3DSA:1.20.1260.GENE3D); IPR008331 (PFAM); IPR001519 (PANTHER); IPR009040 (PROSITE_PROFILES); IPR009078 (SUPERFAMILY)                                                                                                                                                                                                                                                                                                                                                                                                                                                                                                  |
| 1366 | 284116_length_790_cvg_2.9_tip_1_5  | 30    | periostin- partial                                        | 263 | 2.47E-23 | 50.10% | 0.363 Y | IPR000782 (SMART); IPR000782 (G3DSA:2.30.180.GENE3D); IPR000782 (PFAM); PTHR10900 (PANTHER); PTHR10900:SF72 (PANTHER); TRANSMEMBRANE (PHOBIUS); CYTOPLASMIC_DOMAIN (PHOBIUS); NON_CYTOPLASMIC_DOMAIN (PHOBIUS); IPR000782 (PROSITE_PROFILES); IPR000782 (SUPERFAMILY)                                                                                                                                                                                                                                                                                                                                                             |
| 1367 | 284208_length_792_cvg_42.2_tip_1_0 | 303   | probable nuclear transport factor 2 isoform x1            | 264 | 3.98E-47 | 82.00% | 0.097   | IPR002075 (PFAM); G3DSA:3.10.450.50 (GENE3D); PTHR12612 (PANTHER); IPR018222 (PROSITE_PROFILES); SSF54427 (SUPERFAMILY)                                                                                                                                                                                                                                                                                                                                                                                                                                                                                                           |
| 1368 | 284316_length_794_cvg_12.4_tip_1_4 | 92    | tunicate retinoic acid-inducible modular protease         | 265 | 7.10E-13 | 48.40% | 0.133   | IPR002172 (PRINTS); IPR002172 (SMART); IPR002172 (G3DSA:4.10.400.GENE3D); IPR002172 (G3DSA:4.10.400.GENE3D); IPR003014 (PFAM); IPR002172 (PFAM); IPR023415 (PROSITE_PATTERNS); IPR003609 (PROSITE_PROFILES); IPR002172 (PROSITE_PROFILES); IPR003609 (PROSITE_PROFILES); IPR002172 (PROSITE_PROFILES); IPR002172 (SUPERFAMILY); SSF57414 (SUPERFAMILY); IPR002172 (SUPERFAMILY)                                                                                                                                                                                                                                                   |
| 1369 | 284342_length_795_cvg_59.0_tip_1_1 | 1132  | pacifastin light chain                                    | 265 | 6.92E-16 | 51.90% | 0.474 Y | IPR008197 (PRINTS); IPR008197 (SMART); IPR008197 (PFAM); IPR008197 (G3DSA:4.10.75.GENE3D); IPR008037 (PFAM); IPR020862 (PROSITE_PROFILES); IPR020862 (PROSITE_PROFILES); IPR020862 (PROSITE_PROFILES); IPR008197 (PROSITE_PROFILES); IPR008037 (SUPERFAMILY); IPR008037 (SUPERFAMILY); IPR008037 (SUPERFAMILY); IPR008197 (SUPERFAMILY); TMhelix (TMHMM)                                                                                                                                                                                                                                                                          |
| 1370 | 284350_length_795_cvg_59.9_tip_1_5 | 9361  | unnamed protein product                                   | 265 | 1.58E-09 | 73.00% | 0.148   | no IPS match                                                                                                                                                                                                                                                                                                                                                                                                                                                                                                                                                                                                                      |
| 1371 | 284378_length_796_cvg_3.5_tip_1_0  | 40    | adp-ribosylation factor-like protein 1                    | 266 | 5.11E-90 | 95.50% | 0.104   | IPR006689 (PRINTS); IPR006687 (SMART); IPR024156 (SMART); IPR027417 (G3DSA:3.40.50.GENE3D); IPR005225 (TIGRFAM); IPR006689 (PFAM); PTHR11711:SF41 (PANTHER); PTHR11711 (PANTHER); IPR024156 (PROSITE_PROFILES); IPR027417 (SUPERFAMILY)                                                                                                                                                                                                                                                                                                                                                                                           |
| 1372 | 284434_length_798_cvg_10.9_tip_1_4 | 133   | beta-galactosidase-1-like protein 2                       | 266 | 1.21E-77 | 69.50% | 0.148   | IPR001944 (PRINTS); IPR013781 (G3DSA:3.20.20.GENE3D); IPR001944 (PFAM); PTHR23421:SF66 (PANTHER); IPR001944 (PANTHER); IPR019801 (PROSITE_PATTERNS); IPR017853 (SUPERFAMILY)                                                                                                                                                                                                                                                                                                                                                                                                                                                      |
| 1373 | 284462_length_798_cvg_3.3_tip_1_5  | 33    | e3 ubiquitin-protein ligase sh3rf1                        | 266 | 3.43E-29 | 56.70% | 0.106   | IPR001452 (PRINTS); IPR001452 (SMART); G3DSA:2.30.30.40 (GENE3D); IPR001452 (PFAM); PTHR10661 (PANTHER); PTHR10661:SF66 (PANTHER); IPR001452 (PROSITE_PROFILES); SignalP-TM (SIGNALP_GRAM_POSITIVE); IPR001452 (SUPERFAMILY)                                                                                                                                                                                                                                                                                                                                                                                                      |
| 1376 | 284530_length_800_cvg_4.5_tip_1_5  | 43    | ves g 5 allergen                                          | 266 | 4.88E-44 | 51.40% | 0.467 Y | IPR001283 (PRINTS); IPR002413 (PRINTS); IPR014044 (SMART); IPR014044 (G3DSA:3.40.33.GENE3D); IPR014044 (PFAM); IPR001283 (PANTHER); NON_CYTOPLASMIC_DOMAIN (PHOBIUS); TRANSMEMBRANE (PHOBIUS); CYTOPLASMIC_DOMAIN (PHOBIUS); SignalP-TM (SIGNALP_GRAM_POSITIVE); IPR014044 (SUPERFAMILY); TMhelix (TMHMM)                                                                                                                                                                                                                                                                                                                         |
| 1374 | 284508_length_800_cvg_4.0_tip_1_4  | 41    | probable chitinase                                        | 267 | 1.07E-20 | 50.40% | 0.138   | IPR011583 (SMART); IPR013781 (G3DSA:3.20.20.GENE3D); IPR001223 (PFAM); PTHR11177 (PANTHER); IPR017853 (SUPERFAMILY)                                                                                                                                                                                                                                                                                                                                                                                                                                                                                                               |
| 1375 | 284526_length_800_cvg_4.6_tip_1_3  | 54    | estradiol 17-beta-dehydrogenase 12                        | 267 | 1.45E-40 | 67.00% | 0.12    | IPR002198 (PRINTS); IPR002347 (PRINTS); IPR016040 (G3DSA:3.40.50.GENE3D); IPR002198 (PFAM); PTHR24316:SF68 (PANTHER); PTHR24316 (PANTHER); NON_CYTOPLASMIC_DOMAIN (PHOBIUS); CYTOPLASMIC_DOMAIN (PHOBIUS); TRANSMEMBRANE (PHOBIUS); CYTOPLASMIC_DOMAIN (PHOBIUS); TRANSMEMBRANE (PHOBIUS); SSF51735 (SUPERFAMILY); TMhelix (TMHMM); TMhelix (TMHMM)                                                                                                                                                                                                                                                                               |
| 1377 | 284536_length_801_cvg_4.8_tip_1_5  | 58    | calcium-activated chloride channel regulator 1-like       | 267 | 5.11E-25 | 53.80% | 0.106   | PTHR10579 (PANTHER); PTHR10579:SF8 (PANTHER); NON_CYTOPLASMIC_DOMAIN (PHOBIUS); TRANSMEMBRANE (PHOBIUS); CYTOPLASMIC_DOMAIN (PHOBIUS); TMhelix (TMHMM)                                                                                                                                                                                                                                                                                                                                                                                                                                                                            |



|      |                                    |     |                                                        |     |           |        |         |                                                                                                                                                                                                                                                                                                                                                                                                                                                                                                                                                                                                                                  |
|------|------------------------------------|-----|--------------------------------------------------------|-----|-----------|--------|---------|----------------------------------------------------------------------------------------------------------------------------------------------------------------------------------------------------------------------------------------------------------------------------------------------------------------------------------------------------------------------------------------------------------------------------------------------------------------------------------------------------------------------------------------------------------------------------------------------------------------------------------|
| 1392 | 284976_length_811_cvg_19.9_tip_1_2 | 188 | pneumococcal surface protein c                         | 270 | 2.91E-13  | 44.90% | 0.455 Y | SIGNAL_PEPTIDE_N_REGION (PHOBIUS); NON_CYTOPLASMIC_DOMAIN (PHOBIUS); SIGNAL_PEPTIDE_C_REGION (PHOBIUS); SIGNAL_PEPTIDE_H_REGION (PHOBIUS); SIGNAL_PEPTIDE (PHOBIUS); SignalP-noTM (SIGNALP_EUK)                                                                                                                                                                                                                                                                                                                                                                                                                                  |
| 1395 | 284992_length_812_cvg_4.9_tip_1_5  | 58  | neurexin-4 isoform x1                                  | 270 | 4.25E-31  | 48.70% | 0.491 Y | Coil (COILS); IPR002223 (PRINTS); IPR002223 (SMART); IPR002223 (PFAM); IPR002223 (G3DSA:4.10.410.GENE3D); IPR013320 (G3DSA:2.60.120.GENE3D); PTHR10083 (PANTHER); IPR029858 (PTHR10083:PANTHER); IPR020901 (PROSITE_PATTERNS); IPR002223 (PROSITE_PROFILES); SignalP-noTM (SIGNALP_EUK); IPR002223 (SUPERFAMILY)                                                                                                                                                                                                                                                                                                                 |
| 1390 | 284942_length_811_cvg_5.0_tip_1_0  | 46  | laminin subunit gamma-1                                | 271 | 2.36E-62  | 66.90% | 0.105   | Coil (COILS); Coil (COILS); Coil (COILS); PTHR10574:SF228 (PANTHER); PTHR10574 (PANTHER)                                                                                                                                                                                                                                                                                                                                                                                                                                                                                                                                         |
| 1391 | 284970_length_811_cvg_11.8_tip_1_3 | 95  | dipeptidyl peptidase 1 isoform x1                      | 271 | 4.43E-80  | 83.00% | 0.102   | IPR000668 (SMART); IPR000668 (PFAM); G3DSA:3.90.70.10 (GENE3D); G3DSA:2.40.50.170 (GENE3D); PTHR12411:SF314 (PANTHER); IPR013128 (PANTHER); IPR025660 (PROSITE_PATTERNS); IPR025661 (PROSITE_PATTERNS); SSF54001 (SUPERFAMILY)                                                                                                                                                                                                                                                                                                                                                                                                   |
| 1393 | 284984_length_812_cvg_12.6_tip_1_3 | 116 | peptidyl-prolyl cis-trans isomerase cyp11 isoform x1   | 271 | 2.84E-106 | 88.20% | 0.133   | IPR002130 (PRINTS); IPR002130 (PFAM); IPR029000 (G3DSA:2.40.100.GENE3D); PTHR11071:SF229 (PANTHER); IPR024936 (PANTHER); IPR020892 (PROSITE_PATTERNS); IPR002130 (PROSITE_PROFILES); IPR029000 (SUPERFAMILY)                                                                                                                                                                                                                                                                                                                                                                                                                     |
| 1394 | 284990_length_812_cvg_2.0_tip_1_4  | 28  | thrombospondin type-1 domain-containing protein 4-like | 271 | 1.44E-67  | 63.60% | 0.122   | IPR000884 (SMART); IPR000884 (PFAM); G3DSA:2.20.100.10 (GENE3D); PTHR13723 (PANTHER); IPR000884 (PROSITE_PROFILES); IPR000884 (PROSITE_PROFILES); IPR000884 (PROSITE_PROFILES); IPR000884 (SUPERFAMILY); IPR000884 (SUPERFAMILY); IPR000884 (SUPERFAMILY)                                                                                                                                                                                                                                                                                                                                                                        |
| 1396 | 285024_length_813_cvg_10.7_tip_1_4 | 82  | peptidase inhibitor 16                                 | 271 | 8.28E-06  | 52.00% | 0.106   | IPR014044 (G3DSA:3.40.33.GENE3D); IPR018244 (PROSITE_PATTERNS); CYTOPLASMIC_DOMAIN (PHOBIUS); TRANSMEMBRANE (PHOBIUS); CYTOPLASMIC_DOMAIN (PHOBIUS); NON_CYTOPLASMIC_DOMAIN (PHOBIUS); TRANSMEMBRANE (PHOBIUS); TRANSMEMBRANE (PHOBIUS); NON_CYTOPLASMIC_DOMAIN (PHOBIUS); TMhelix (TMHMM); TMhelix (TMHMM)                                                                                                                                                                                                                                                                                                                      |
| 1397 | 285030_length_813_cvg_3.4_tip_1_1  | 37  | calponin homology domain containing                    | 271 | 9.47E-67  | 58.60% | 0.136   | Coil (COILS); IPR001611 (PFAM); G3DSA:3.80.10.10 (GENE3D); PTHR23155 (PANTHER); PTHR23155:SF423 (PANTHER); IPR001611 (PROSITE_PROFILES); IPR001611 (PROSITE_PROFILES); SSF52075 (SUPERFAMILY)                                                                                                                                                                                                                                                                                                                                                                                                                                    |
| 1398 | 285036_length_813_cvg_5.0_tip_1_3  | 50  | protein twisted gastrulation                           | 271 | 7.73E-83  | 78.40% | 0.142   | IPR006761 (PFAM); PTHR12312:SF15 (PANTHER); IPR006761 (PANTHER); TRANSMEMBRANE (PHOBIUS); CYTOPLASMIC_DOMAIN (PHOBIUS); NON_CYTOPLASMIC_DOMAIN (PHOBIUS)                                                                                                                                                                                                                                                                                                                                                                                                                                                                         |
| 1399 | 285054_length_814_cvg_14.7_tip_1_0 | 112 | abhydrolase domain-containing protein partial          | 272 | 4.73E-121 | 75.70% | 0.137   | IPR029059 (PFAM); IPR029058 (G3DSA:3.40.50.GENE3D); PTHR12277:SF44 (PANTHER); PTHR12277 (PANTHER); IPR029058 (SUPERFAMILY)                                                                                                                                                                                                                                                                                                                                                                                                                                                                                                       |
| 1400 | 285078_length_815_cvg_4.3_tip_1_0  | 44  | apolipoprotein partial                                 | 272 | 2.31E-53  | 55.30% | 0.103   | PR00018 (PRINTS); IPR000001 (SMART); G3DSA:2.40.20.10 (GENE3D); IPR000001 (PFAM); PTHR24259 (PANTHER); IPR018056 (PROSITE_PATTERNS); IPR018056 (PROSITE_PATTERNS); IPR000001 (PROSITE_PROFILES); IPR000001 (PROSITE_PROFILES); IPR013806 (SUPERFAMILY); IPR013806 (SUPERFAMILY)                                                                                                                                                                                                                                                                                                                                                  |
| 1401 | 285114_length_815_cvg_9.4_tip_1_1  | 89  | cysteine string protein                                | 272 | 3.60E-100 | 75.80% | 0.233   | IPR001623 (PRINTS); IPR001623 (SMART); IPR001623 (G3DSA:1.10.287.GENE3D); IPR001623 (PFAM); PTHR24078:SF5 (PANTHER); PTHR24078 (PANTHER); IPR018253 (PROSITE_PATTERNS); IPR001623 (PROSITE_PROFILES); IPR001623 (SUPERFAMILY)                                                                                                                                                                                                                                                                                                                                                                                                    |
| 1402 | 285124_length_816_cvg_50.3_tip_1_5 | 873 | Adrenodoxin, mitochondrial                             | 272 | 2.53E-52  | 76.90% | 0.123   | IPR001055 (PRINTS); IPR001041 (PFAM); IPR012675 (G3DSA:3.10.20.GENE3D); PTHR23426 (PANTHER); PTHR23426:SF21 (PANTHER); IPR018298 (PROSITE_PATTERNS); IPR001041 (PROSITE_PROFILES); IPR001041 (SUPERFAMILY)                                                                                                                                                                                                                                                                                                                                                                                                                       |
| 1403 | 285134_length_816_cvg_4.7_tip_1_4  | 53  | carboxypeptidase m isoform x2                          | 272 | 1.57E-41  | 69.50% | 0.219   | PF13620 (PFAM); IPR014766 (G3DSA:2.60.40.GENE3D); IPR027062 (PTHR11532:PANTHER); PTHR11532 (PANTHER); IPR008969 (SUPERFAMILY)                                                                                                                                                                                                                                                                                                                                                                                                                                                                                                    |
| 1404 | 285168_length_817_cvg_3.0_tip_1_4  | 39  | zinc finger protein 350-like isoform x1                | 272 | 9.55E-46  | 79.80% | 0.1     | IPR015880 (SMART); PF13465 (PFAM); IPR007087 (PFAM); IPR013087 (G3DSA:3.30.160.GENE3D); IPR013087 (G3DSA:3.30.160.GENE3D); IPR013087 (G3DSA:3.30.160.GENE3D); IPR013087 (G3DSA:3.30.160.GENE3D); PTHR24409 (PANTHER); IPR007087 (PROSITE_PATTERNS); IPR007087 (PROSITE_PATTERNS); IPR007087 (PROSITE_PATTERNS); IPR007087 (PROSITE_PATTERNS); IPR007087 (PROSITE_PROFILES); IPR007087 (PROSITE_PROFILES); IPR007087 (PROSITE_PROFILES); IPR007087 (PROSITE_PROFILES); IPR007087 (PROSITE_PROFILES); IPR007087 (PROSITE_PROFILES); SSF57667 (SUPERFAMILY); SSF57667 (SUPERFAMILY); SSF57667 (SUPERFAMILY); SSF57667 (SUPERFAMILY) |
| 1405 | 285190_length_817_cvg_6.4_tip_1_4  | 88  | gamma-interferon-inducible lysosomal thiol reductase   | 272 | 7.12E-44  | 51.30% | 0.322   | IPR004911 (PFAM); IPR004911 (PANTHER); PTHR13234:SF8 (PANTHER)                                                                                                                                                                                                                                                                                                                                                                                                                                                                                                                                                                   |



|      |                                    |      |                                                                                      |     |           |        |         |                                                                                                                                                                                                                                                                                                                                                                                                                                                                                                                                                                                             |
|------|------------------------------------|------|--------------------------------------------------------------------------------------|-----|-----------|--------|---------|---------------------------------------------------------------------------------------------------------------------------------------------------------------------------------------------------------------------------------------------------------------------------------------------------------------------------------------------------------------------------------------------------------------------------------------------------------------------------------------------------------------------------------------------------------------------------------------------|
| 1406 | 285202_length_818_cvg_5.9_tip_1_2  | 52   | lipophorin receptor                                                                  | 272 | 2.51E-74  | 63.30% | 0.121   | IPR000742 (SMART); IPR000033 (SMART); IPR001881 (SMART); IPR002172 (SMART); G3DSA:2.10.25.10 (GENE3D); IPR011042 (G3DSA:2.120.10.GENE3D); IPR002172 (PFAM); IPR000033 (PFAM); G3DSA:2.10.25.10 (GENE3D); IPR001881 (PFAM); IPR002172 (G3DSA:4.10.400.GENE3D); PTHR10529 (PANTHER); IPR023415 (PROSITE_PATTERNS); IPR018097 (PROSITE_PATTERNS); IPR000152 (PROSITE_PATTERNS); IPR000033 (PROSITE_PROFILES); IPR002172 (PROSITE_PROFILES); IPR000033 (PROSITE_PROFILES); IPR000033 (PROSITE_PROFILES); IPR002172 (SUPERFAMILY); SSF63825 (SUPERFAMILY); IPR009030 (SUPERFAMILY)               |
| 1407 | 285226_length_818_cvg_3.6_tip_1_4  | 53   | zona pellucida-binding protein 2-like isoform x2                                     | 273 | 1.09E-07  | 49.00% | 0.119   | G3DSA:2.10.50.10 (GENE3D); IPR011641 (PFAM)                                                                                                                                                                                                                                                                                                                                                                                                                                                                                                                                                 |
| 1408 | 285240_length_819_cvg_6.0_tip_1_3  | 66   | insulin-like growth factor-binding protein 7 precursor                               | 273 | 4.55E-74  | 58.90% | 0.544 Y | IPR002350 (SMART); IPR003598 (SMART); IPR000867 (SMART); IPR000867 (PFAM); G3DSA:3.30.60.30 (GENE3D); IPR013783 (G3DSA:2.60.40.GENE3D); IPR002350 (PFAM); IPR013098 (PFAM); IPR011390 (PANTHER); PTHR14186:SF9 (PANTHER); SIGNAL_PEPTIDE_H_REGION (PHOBIUS); SIGNAL_PEPTIDE_N_REGION (PHOBIUS); SIGNAL_PEPTIDE (PHOBIUS); SIGNAL_PEPTIDE_C_REGION (PHOBIUS); NON_CYTOPLASMIC_DOMAIN (PHOBIUS); IPR000867 (PROSITE_PROFILES); IPR002350 (PROSITE_PROFILES); IPR007110 (PROSITE_PROFILES); SignalP-TM (SIGNALP_EUK); SSF48726 (SUPERFAMILY); IPR009030 (SUPERFAMILY); SSF100895 (SUPERFAMILY) |
| 1409 | 285248_length_819_cvg_8.7_tip_1_4  | 99   | trypsinogen 2                                                                        | 273 | 2.07E-93  | 67.20% | 0.520 Y | IPR001314 (PRINTS); IPR001254 (SMART); G3DSA:2.40.10.10 (GENE3D); IPR001254 (PFAM); G3DSA:2.40.10.10 (GENE3D); G3DSA:2.40.10.10 (GENE3D); PTHR24265 (PANTHER); IPR018114 (PROSITE_PATTERNS); SIGNAL_PEPTIDE (PHOBIUS); NON_CYTOPLASMIC_DOMAIN (PHOBIUS); SIGNAL_PEPTIDE_C_REGION (PHOBIUS); SIGNAL_PEPTIDE_H_REGION (PHOBIUS); SIGNAL_PEPTIDE_N_REGION (PHOBIUS); IPR001254 (PROSITE_PROFILES); SignalP-noTM (SIGNALP_EUK); IPR009003 (SUPERFAMILY)                                                                                                                                         |
| 1410 | 285254_length_819_cvg_42.8_tip_1_3 | 373  | kielin chordin-like protein                                                          | 273 | 2.67E-18  | 40.00% | 0.784 Y | IPR001846 (PFAM); G3DSA:2.10.70.10 (GENE3D); PTHR11339 (PANTHER); NON_CYTOPLASMIC_DOMAIN (PHOBIUS); SIGNAL_PEPTIDE_H_REGION (PHOBIUS); SIGNAL_PEPTIDE (PHOBIUS); SIGNAL_PEPTIDE_C_REGION (PHOBIUS); SIGNAL_PEPTIDE_N_REGION (PHOBIUS); IPR001846 (PROSITE_PROFILES); SignalP-noTM (SIGNALP_EUK); SignalP-noTM (SIGNALP_GRAM_NEGATIVE); SignalP-TM (SIGNALP_GRAM_POSITIVE); SSF57603 (SUPERFAMILY); TMhelix (TMHMM)                                                                                                                                                                          |
| 1411 | 285268_length_819_cvg_3.8_tip_1_3  | 51   | multiple pdz domain                                                                  | 273 | 1.13E-89  | 67.70% | 0.096   | IPR001478 (SMART); IPR001478 (G3DSA:2.30.42.GENE3D); IPR001478 (G3DSA:2.30.42.GENE3D); IPR001478 (PFAM); PTHR19964 (PANTHER); TRANSMEMBRANE (PHOBIUS); CYTOPLASMIC_DOMAIN (PHOBIUS); NON_CYTOPLASMIC_DOMAIN (PHOBIUS); NON_CYTOPLASMIC_DOMAIN (PHOBIUS); TRANSMEMBRANE (PHOBIUS); IPR001478 (PROSITE_PROFILES); IPR001478 (PROSITE_PROFILES); IPR001478 (SUPERFAMILY); IPR001478 (SUPERFAMILY)                                                                                                                                                                                              |
| 1412 | 285270_length_819_cvg_3.2_tip_1_4  | 33   | carbonyl reductase                                                                   | 273 | 6.10E-93  | 74.50% | 0.125   | IPR002198 (PRINTS); IPR002347 (PRINTS); IPR016040 (G3DSA:3.40.50.GENE3D); IPR002198 (PFAM); PTHR24322:SF58 (PANTHER); PTHR24322 (PANTHER); SSF51735 (SUPERFAMILY)                                                                                                                                                                                                                                                                                                                                                                                                                           |
| 1413 | 285286_length_820_cvg_16.7_tip_1_3 | 141  | reelin- partial                                                                      | 274 | 5.10E-52  | 69.20% | 0.107   | PTHR11841 (PANTHER)                                                                                                                                                                                                                                                                                                                                                                                                                                                                                                                                                                         |
| 1415 | 285328_length_821_cvg_56.9_tip_1_0 | 1286 | carboxypeptidase                                                                     | 274 | 2.39E-52  | 59.20% | 0.25    | IPR000834 (PRINTS); IPR000834 (SMART); IPR000834 (PFAM); G3DSA:3.40.630.10 (GENE3D); IPR003146 (PFAM); IPR003146 (G3DSA:3.30.70.GENE3D); PTHR11705 (PANTHER); IPR000834 (PROSITE_PATTERNS); SSF53187 (SUPERFAMILY); IPR009020 (SUPERFAMILY)                                                                                                                                                                                                                                                                                                                                                 |
| 1416 | 285354_length_821_cvg_49.6_tip_1_0 | 444  | phosphatidylinositol 4-phosphate 3-kinase c2 domain-containing subunit beta- partial | 274 | 7.60E-17  | 43.00% | 0.107   | G3DSA:1.20.120.20 (GENE3D); SSF47162 (SUPERFAMILY)                                                                                                                                                                                                                                                                                                                                                                                                                                                                                                                                          |
| 1417 | 285402_length_822_cvg_6.0_tip_1_3  | 59   | e3 ubiquitin-protein ligase mib2                                                     | 274 | 1.75E-138 | 79.80% | 0.102   | IPR002110 (PRINTS); IPR002110 (SMART); IPR020683 (PFAM); IPR020683 (G3DSA:1.25.40.GENE3D); IPR020683 (G3DSA:1.25.40.GENE3D); PTHR24202 (PANTHER); PTHR24202:SF4 (PANTHER); IPR002110 (PROSITE_PROFILES); IPR002110 (PROSITE_PROFILES); IPR020683 (PROSITE_PROFILES); IPR002110 (PROSITE_PROFILES); IPR002110 (PROSITE_PROFILES); IPR020683 (SUPERFAMILY)                                                                                                                                                                                                                                    |

|      |                                    |     |                                                                             |     |           |        |         |                                                                                                                                                                                                                                                                                                                                                             |
|------|------------------------------------|-----|-----------------------------------------------------------------------------|-----|-----------|--------|---------|-------------------------------------------------------------------------------------------------------------------------------------------------------------------------------------------------------------------------------------------------------------------------------------------------------------------------------------------------------------|
| 1418 | 285494_length_824_cvg_6.0_tip_1_1  | 62  | probable cytosolic iron-sulfur protein assembly protein<br>ciao1 isoform x1 | 275 | 3.51E-134 | 82.90% | 0.101   | IPR020472 (PRINTS); IPR001680 (SMART); IPR001680 (PFAM); IPR015943 (G3DSA:2.130.10.GENE3D); PTHR19920:SF0 (PANTHER); PTHR19920 (PANTHER); IPR019775 (PROSITE_PATTERNS); IPR001680 (PROSITE_PROFILES); IPR001680 (PROSITE_PROFILES); IPR001680 (PROSITE_PROFILES); IPR017986 (PROSITE_PROFILES); IPR001680 (PROSITE_PROFILES); IPR017986 (SUPERFAMILY)       |
| 1419 | 285512_length_825_cvg_5.7_tip_1_4  | 58  | alpha-mannosidase partial                                                   | 275 | 3.15E-111 | 74.30% | 0.101   | G3DSA:2.70.98.30 (GENE3D); IPR011682 (PFAM); PTHR11607:SF22 (PANTHER); PTHR11607 (PANTHER); IPR011013 (SUPERFAMILY)                                                                                                                                                                                                                                         |
| 1420 | 285562_length_826_cvg_3.0_tip_1_1  | 37  | aldehyde dehydrogenase family 9 member a1-b-like                            | 275 | 5.35E-124 | 77.90% | 0.122   | IPR015590 (PFAM); IPR016163 (G3DSA:3.40.309.GENE3D); IPR016162 (G3DSA:3.40.605.GENE3D); PTHR11699:SF114 (PANTHER); PTHR11699 (PANTHER); IPR029510 (PROSITE_PATTERNS); IPR016160 (PROSITE_PATTERNS); IPR016161 (SUPERFAMILY)                                                                                                                                 |
| 1421 | 285566_length_826_cvg_4.5_tip_1_5  | 52  | hook dna-binding motif-containing protein 1                                 | 275 | 5.79E-07  | 52.00% | 0.098   | no IPS match                                                                                                                                                                                                                                                                                                                                                |
| 1422 | 285582_length_827_cvg_3.2_tip_1_5  | 40  | anti-lipopolysaccharide factor like protein                                 | 275 | 6.84E-15  | 57.50% | 0.161   | IPR024509 (PFAM); NON_CYTOPLASMIC_DOMAIN (PHOBIUS); CYTOPLASMIC_DOMAIN (PHOBIUS); TRANSMEMBRANE (PHOBIUS); NON_CYTOPLASMIC_DOMAIN (PHOBIUS); TRANSMEMBRANE (PHOBIUS); IPR024716 (PRODOM); TMhelix (TMHMM); TMhelix (TMHMM)                                                                                                                                  |
| 1423 | 285602_length_828_cvg_2.1_tip_1_3  | 27  | adam 10                                                                     | 276 | 2.06E-145 | 83.60% | 0.141   | IPR024079 (G3DSA:3.40.390.GENE3D); PF13688 (PFAM); PTHR11905 (PANTHER); PTHR11905:SF4 (PANTHER); IPR001590 (PROSITE_PROFILES); SSF55486 (SUPERFAMILY)                                                                                                                                                                                                       |
| 1424 | 285638_length_828_cvg_3.7_tip_1_0  | 47  | iduronate 2-sulfatase-like                                                  | 276 | 2.72E-83  | 59.70% | 0.118   | G3DSA:3.30.1120.10 (GENE3D); IPR000917 (PFAM); IPR017849 (G3DSA:3.40.720.GENE3D); PTHR10342:SF185 (PANTHER); PTHR10342 (PANTHER); IPR017850 (SUPERFAMILY)                                                                                                                                                                                                   |
| 1425 | 285766_length_832_cvg_2.0_tip_1_5  | 36  | iduronate 2- partial                                                        | 277 | 1.70E-114 | 77.60% | 0.630 Y | IPR017849 (G3DSA:3.40.720.GENE3D); IPR000917 (PFAM); PTHR10342:SF185 (PANTHER); PTHR10342 (PANTHER); IPR024607 (PROSITE_PATTERNS); SIGNAL_PEPTIDE_C_REGION (PHOBIUS); SIGNAL_PEPTIDE_N_REGION (PHOBIUS); SIGNAL_PEPTIDE (PHOBIUS); NON_CYTOPLASMIC_DOMAIN (PHOBIUS); SIGNAL_PEPTIDE_H_REGION (PHOBIUS); SignalP-noTM (SIGNALP_EUK); IPR017850 (SUPERFAMILY) |
| 1426 | 285832_length_834_cvg_7.0_tip_1_1  | 62  | maltase- intestinal-like                                                    | 278 | 9.63E-61  | 58.30% | 0.15    | IPR000322 (PFAM); PTHR22762 (PANTHER); PTHR22762:SF7 (PANTHER); SSF51011 (SUPERFAMILY); IPR017853 (SUPERFAMILY)                                                                                                                                                                                                                                             |
| 1427 | 285844_length_834_cvg_10.5_tip_1_1 | 106 | dnaj homolog subfamily c member 9                                           | 278 | 2.53E-89  | 75.10% | 0.116   | Coil (COILS); Coil (COILS); IPR001623 (PRINTS); IPR001623 (SMART); IPR001623 (PFAM); IPR001623 (G3DSA:1.10.287.GENE3D); PTHR24078 (PANTHER); PTHR24078:SF166 (PANTHER); IPR018253 (PROSITE_PATTERNS); IPR001623 (PROSITE_PROFILES); IPR001623 (SUPERFAMILY)                                                                                                 |
| 1428 | 285904_length_836_cvg_7.5_tip_1_0  | 92  | cytolysin src-1-like isoform x2                                             | 279 | 2.05E-25  | 51.00% | 0.114   | IPR009104 (PFAM); IPR015926 (G3DSA:2.60.270.GENE3D); IPR015926 (SUPERFAMILY)                                                                                                                                                                                                                                                                                |
| 1429 | 285924_length_836_cvg_4.7_tip_1_0  | 43  | alpha-mannosidase 2                                                         | 279 | 9.21E-139 | 78.50% | 0.102   | IPR015341 (SMART); IPR000602 (PFAM); IPR015341 (PFAM); IPR015341 (G3DSA:1.20.1270.GENE3D); IPR027291 (G3DSA:3.20.110.GENE3D); PTHR11607 (PANTHER); PTHR11607:SF22 (PANTHER); IPR028995 (SUPERFAMILY); IPR011330 (SUPERFAMILY)                                                                                                                               |
| 1430 | 285934_length_836_cvg_2.8_tip_1_1  | 28  | lpxtg motif protein                                                         | 279 | 1.68E-09  | 54.00% | 0.174   | Coil (COILS)                                                                                                                                                                                                                                                                                                                                                |
| 1431 | 285992_length_838_cvg_4.0_tip_1_1  | 45  | low quality protein: mucin-19                                               | 279 | 7.12E-07  | 53.00% | 0.142   | CYTOPLASMIC_DOMAIN (PHOBIUS); CYTOPLASMIC_DOMAIN (PHOBIUS); TRANSMEMBRANE (PHOBIUS); TRANSMEMBRANE (PHOBIUS); NON_CYTOPLASMIC_DOMAIN (PHOBIUS); NON_CYTOPLASMIC_DOMAIN (PHOBIUS); TRANSMEMBRANE (PHOBIUS)                                                                                                                                                   |
| 1432 | 285994_length_838_cvg_5.5_tip_1_4  | 51  | ectonucleoside triphosphate diphosphohydrolase 5<br>isoform x2              | 279 | 5.84E-101 | 67.00% | 0.168   | IPR000407 (PFAM); PTHR11782:SF35 (PANTHER); IPR000407 (PANTHER)                                                                                                                                                                                                                                                                                             |
| 1433 | 286034_length_839_cvg_3.0_tip_1_5  | 38  | arylsulfatase a-like                                                        | 279 | 7.51E-114 | 71.30% | 0.686 Y | IPR017849 (G3DSA:3.40.720.GENE3D); IPR000917 (PFAM); PTHR10342 (PANTHER); PTHR10342:SF22 (PANTHER); IPR024607 (PROSITE_PATTERNS); SIGNAL_PEPTIDE_C_REGION (PHOBIUS); SIGNAL_PEPTIDE_H_REGION (PHOBIUS); NON_CYTOPLASMIC_DOMAIN (PHOBIUS); SIGNAL_PEPTIDE (PHOBIUS); SIGNAL_PEPTIDE_N_REGION (PHOBIUS); SignalP-noTM (SIGNALP_EUK); IPR017850 (SUPERFAMILY)  |
| 1434 | 286050_length_840_cvg_7.9_tip_1_0  | 103 | macrophage mannose receptor 1-like                                          | 280 | 2.07E-26  | 48.90% | 0.117   | IPR001304 (SMART); IPR016186 (G3DSA:3.10.100.GENE3D); IPR001304 (PFAM); PTHR22803 (PANTHER); PTHR22803:SF16 (PANTHER); IPR018378 (PROSITE_PATTERNS); TRANSMEMBRANE (PHOBIUS); NON_CYTOPLASMIC_DOMAIN (PHOBIUS); CYTOPLASMIC_DOMAIN (PHOBIUS); IPR001304 (PROSITE_PROFILES); IPR016187 (SUPERFAMILY); TMhelix (TMHMM)                                        |
| 1435 | 286074_length_840_cvg_8.0_tip_1_5  | 67  | flavin-containing monooxygenase fmo gs-ox-like 4                            | 280 | 4.25E-102 | 66.20% | 0.103   | IPR000960 (PRINTS); G3DSA:3.50.50.60 (GENE3D); G3DSA:3.50.50.60 (GENE3D); IPR020946 (PFAM); PTHR23023:SF4 (PANTHER); PTHR23023 (PANTHER); SSF51905 (SUPERFAMILY); SSF51905 (SUPERFAMILY)                                                                                                                                                                    |



|      |                                    |      |                                                            |     |           |        |         |                                                                                                                                                                                                                                                                                                                                                                                                                                                                                                                                                             |
|------|------------------------------------|------|------------------------------------------------------------|-----|-----------|--------|---------|-------------------------------------------------------------------------------------------------------------------------------------------------------------------------------------------------------------------------------------------------------------------------------------------------------------------------------------------------------------------------------------------------------------------------------------------------------------------------------------------------------------------------------------------------------------|
| 1447 | 286356_length_847_cvg_2.4_tip_1_2  | 34   | pancreatic lipase-related protein                          | 282 | 4.73E-29  | 57.40% | 0.114   | IPR013818 (PFAM); IPR029058 (G3DSA:3.40.50.GENE3D); IPR000734 (PANTHER); IPR029058 (SUPERFAMILY)                                                                                                                                                                                                                                                                                                                                                                                                                                                            |
| 1448 | 286362_length_847_cvg_61.9_tip_1_5 | 4885 | hemagglutinin amebocyte aggregation factor-like            | 282 | 8.79E-38  | 57.70% | 0.152   | PF14704 (PFAM); IPR026645 (PANTHER); TRANSMEMBRANE (PHOBIUS); NON_CYTOPLASMIC_DOMAIN (PHOBIUS); CYTOPLASMIC_DOMAIN (PHOBIUS); TMhelix (TMHMM)                                                                                                                                                                                                                                                                                                                                                                                                               |
| 1449 | 286658_length_855_cvg_4.0_tip_1_5  | 47   | kielin130 protein                                          | 285 | 4.73E-13  | 46.00% | 0.12    | IPR001846 (PFAM); IPR001846 (PROSITE_PROFILES)                                                                                                                                                                                                                                                                                                                                                                                                                                                                                                              |
| 1451 | 286706_length_856_cvg_3.0_tip_1_1  | 41   | carbonic anhydrase 1                                       | 285 | 3.31E-33  | 68.40% | 0.129   | IPR001148 (SMART); IPR001148 (G3DSA:3.10.200.GENE3D); IPR001148 (PFAM); IPR023561 (PANTHER); IPR001148 (PROSITE_PROFILES); IPR001148 (SUPERFAMILY)                                                                                                                                                                                                                                                                                                                                                                                                          |
| 1450 | 286686_length_856_cvg_3.2_tip_1_0  | 32   | proteinase inhibitor i4 serpin                             | 286 | 5.00E-11  | 53.30% | 0.114   | IPR023796 (PFAM); G3DSA:3.30.497.10 (GENE3D); IPR000215 (PANTHER); IPR023796 (SUPERFAMILY)                                                                                                                                                                                                                                                                                                                                                                                                                                                                  |
| 1452 | 286758_length_857_cvg_62.8_tip_1_4 | 834  | cre-nas-7 protein                                          | 286 | 7.86E-34  | 53.90% | 0.903 Y | IPR001506 (PRINTS); IPR006026 (SMART); IPR001506 (PFAM); IPR024079 (G3DSA:3.40.390.GENE3D); PTHR10127 (PANTHER); CYTOPLASMIC_DOMAIN (PHOBIUS); SIGNAL_PEPTIDE_C_REGION (PHOBIUS); SIGNAL_PEPTIDE_N_REGION (PHOBIUS); NON_CYTOPLASMIC_DOMAIN (PHOBIUS); TRANSMEMBRANE (PHOBIUS); SIGNAL_PEPTIDE_H_REGION (PHOBIUS); SIGNAL_PEPTIDE (PHOBIUS); SignalP-noTM (SIGNALP_EUK); SSF55486 (SUPERFAMILY); TMhelix (TMHMM)                                                                                                                                            |
| 1453 | 286908_length_861_cvg_4.0_tip_1_4  | 45   | carboxypeptidase d-like                                    | 287 | 1.31E-101 | 69.40% | 0.443 Y | Coil (COILS); IPR000834 (PRINTS); IPR000834 (SMART); G3DSA:3.40.630.10 (GENE3D); IPR000834 (PFAM); IPR015567 (PTHR11532:PANTHER); PTHR11532 (PANTHER); IPR000834 (PROSITE_PATTERNS); IPR000834 (PROSITE_PATTERNS); SIGNAL_PEPTIDE_C_REGION (PHOBIUS); NON_CYTOPLASMIC_DOMAIN (PHOBIUS); SIGNAL_PEPTIDE_H_REGION (PHOBIUS); SIGNAL_PEPTIDE_N_REGION (PHOBIUS); SIGNAL_PEPTIDE (PHOBIUS); SignalP-noTM (SIGNALP_GRAM_NEGATIVE); SSF53187 (SUPERFAMILY)                                                                                                        |
| 1455 | 286970_length_863_cvg_57.7_tip_1_5 | 1108 | blastula protease 10-like                                  | 287 | 1.46E-30  | 56.20% | 0.546 Y | IPR001506 (PRINTS); IPR006026 (SMART); IPR001506 (PFAM); IPR024079 (G3DSA:3.40.390.GENE3D); PTHR10127:SF580 (PANTHER); PTHR10127 (PANTHER); SIGNAL_PEPTIDE_N_REGION (PHOBIUS); SIGNAL_PEPTIDE_C_REGION (PHOBIUS); NON_CYTOPLASMIC_DOMAIN (PHOBIUS); SIGNAL_PEPTIDE (PHOBIUS); SIGNAL_PEPTIDE_H_REGION (PHOBIUS); SignalP-noTM (SIGNALP_EUK); SSF55486 (SUPERFAMILY); TMhelix (TMHMM)                                                                                                                                                                        |
| 1454 | 286934_length_862_cvg_4.3_tip_1_3  | 40   | aael005189- partial                                        | 288 | 9.88E-32  | 74.00% | 0.108   | IPR003112 (PFAM); PTHR23192 (PANTHER); PTHR23192:SF33 (PANTHER); IPR003112 (PROSITE_PROFILES)                                                                                                                                                                                                                                                                                                                                                                                                                                                               |
| 1456 | 286996_length_864_cvg_6.0_tip_1_2  | 57   | collagen alpha 1 chain                                     | 288 | 4.51E-50  | 69.30% | 0.114   | IPR010515 (PFAM); IPR016186 (G3DSA:3.10.100.GENE3D); IPR026917 (PTHR24023:PANTHER); PTHR24023 (PANTHER); CYTOPLASMIC_DOMAIN (PHOBIUS); TRANSMEMBRANE (PHOBIUS); NON_CYTOPLASMIC_DOMAIN (PHOBIUS); IPR016187 (SUPERFAMILY)                                                                                                                                                                                                                                                                                                                                   |
| 1485 | 288156_length_900_cvg_7.8_tip_1_1  | 75   | peptidyl-alpha-hydroxyglycine alpha-amidating lyase 2-like | 288 | 5.44E-31  | 60.60% | 0.139   | IPR001258 (PFAM); IPR011042 (G3DSA:2.120.10.GENE3D); PTHR10680 (PANTHER); SSF63825 (SUPERFAMILY)                                                                                                                                                                                                                                                                                                                                                                                                                                                            |
| 1457 | 287060_length_866_cvg_54.2_tip_1_1 | 619  | trypsinogen 2                                              | 289 | 3.18E-70  | 59.00% | 0.882 Y | IPR001314 (PRINTS); IPR001254 (SMART); G3DSA:2.40.10.10 (GENE3D); G3DSA:2.40.10.10 (GENE3D); G3DSA:2.40.10.10 (GENE3D); IPR001254 (PFAM); PTHR24265 (PANTHER); IPR018114 (PROSITE_PATTERNS); IPR018114 (PROSITE_PATTERNS); SIGNAL_PEPTIDE_N_REGION (PHOBIUS); NON_CYTOPLASMIC_DOMAIN (PHOBIUS); SIGNAL_PEPTIDE_C_REGION (PHOBIUS); SIGNAL_PEPTIDE_H_REGION (PHOBIUS); SIGNAL_PEPTIDE (PHOBIUS); IPR001254 (PROSITE_PROFILES); SignalP-noTM (SIGNALP_EUK); SignalP-noTM (SIGNALP_GRAM_NEGATIVE); SignalP-TM (SIGNALP_GRAM_POSITIVE); IPR009003 (SUPERFAMILY) |
| 1458 | 287066_length_866_cvg_3.0_tip_1_1  | 31   | omega-amidase nit2-like                                    | 289 | 7.19E-142 | 83.20% | 0.101   | IPR003010 (PFAM); IPR003010 (G3DSA:3.60.110.GENE3D); PTHR23088:SF20 (PANTHER); PTHR23088 (PANTHER); IPR003010 (PROSITE_PROFILES); IPR003010 (SUPERFAMILY)                                                                                                                                                                                                                                                                                                                                                                                                   |
| 1459 | 287076_length_867_cvg_32.0_tip_1_1 | 334  | sparc                                                      | 289 | 7.39E-112 | 78.70% | 0.109   | Coil (COILS); Coil (COILS); IPR003645 (SMART); IPR011992 (G3DSA:1.10.238.GENE3D); G3DSA:3.30.60.30 (GENE3D); IPR019577 (PFAM); PTHR13866:SF14 (PANTHER); PTHR13866 (PANTHER); IPR001999 (PROSITE_PATTERNS); IPR018247 (PROSITE_PATTERNS); SSF47473 (SUPERFAMILY); SSF100895 (SUPERFAMILY)                                                                                                                                                                                                                                                                   |
| 1460 | 287102_length_867_cvg_12.9_tip_1_4 | 142  | u8-agatoxin-ao1a-like isoform x2                           | 289 | 3.62E-35  | 73.00% | 0.702 Y | IPR004169 (PFAM); SIGNAL_PEPTIDE_N_REGION (PHOBIUS); SIGNAL_PEPTIDE_H_REGION (PHOBIUS); CYTOPLASMIC_DOMAIN (PHOBIUS); NON_CYTOPLASMIC_DOMAIN (PHOBIUS); TRANSMEMBRANE (PHOBIUS); TRANSMEMBRANE (PHOBIUS); SIGNAL_PEPTIDE (PHOBIUS); NON_CYTOPLASMIC_DOMAIN (PHOBIUS); SIGNAL_PEPTIDE_C_REGION (PHOBIUS); SignalP-TM (SIGNALP_EUK); SignalP-TM (SIGNALP_GRAM_NEGATIVE); SSF57059 (SUPERFAMILY); TMhelix (TMHMM); TMhelix (TMHMM)                                                                                                                             |

|      |                                    |      |                                           |     |           |        |         |                                                                                                                                                                                                                                                                                                                                                                                                                                                                                                   |
|------|------------------------------------|------|-------------------------------------------|-----|-----------|--------|---------|---------------------------------------------------------------------------------------------------------------------------------------------------------------------------------------------------------------------------------------------------------------------------------------------------------------------------------------------------------------------------------------------------------------------------------------------------------------------------------------------------|
| 1461 | 287158_length_869_cvg_67.3_tip_1_4 | 7534 | zinc metalloproteinase nas-13             | 290 | 2.73E-63  | 58.30% | 0.797 Y | IPR001506 (PRINTS); IPR006026 (SMART); IPR001506 (PFAM); IPR024079 (G3DSA:3.40.390.GENE3D); PTHR10127 (PANTHER); NON_CYTOPLASMIC_DOMAIN (PHOBIUS); SIGNAL_PEPTIDE_N_REGION (PHOBIUS); SIGNAL_PEPTIDE_H_REGION (PHOBIUS); SIGNAL_PEPTIDE_C_REGION (PHOBIUS); SIGNAL_PEPTIDE (PHOBIUS); SignalP-noTM (SIGNALP_EUK); SSF55486 (SUPERFAMILY)                                                                                                                                                          |
| 1462 | 287202_length_870_cvg_5.8_tip_1_1  | 68   | coagulation factor x-like                 | 290 | 8.91E-28  | 57.20% | 0.138   | IPR001314 (PRINTS); IPR001254 (SMART); IPR002172 (SMART); IPR001254 (PFAM); G3DSA:2.40.10.10 (GENE3D); G3DSA:2.40.10.10 (GENE3D); IPR002172 (PFAM); IPR002172 (G3DSA:4.10.400.GENE3D); IPR002172 (G3DSA:4.10.400.GENE3D); PTHR24265 (PANTHER); IPR002172 (PROSITE_PROFILES); IPR001254 (PROSITE_PROFILES); IPR003609 (PROSITE_PROFILES); IPR009003 (SUPERFAMILY); IPR002172 (SUPERFAMILY)                                                                                                         |
| 1463 | 287228_length_871_cvg_3.0_tip_1_0  | 35   | chorion peroxidase-like                   | 291 | 4.52E-120 | 67.60% | 0.119   | IPR019791 (PRINTS); IPR019791 (PFAM); IPR019791 (G3DSA:1.10.640.GENE3D); PTHR11475 (PANTHER); IPR019791 (PROSITE_PROFILES); IPR010255 (SUPERFAMILY)                                                                                                                                                                                                                                                                                                                                               |
| 1464 | 287280_length_872_cvg_9.8_tip_1_4  | 88   | secreted partial                          | 291 | 1.76E-45  | 75.60% | 0.107   | IPR003585 (SMART); IPR027789 (PFAM); PTHR10915:SF1 (PANTHER); IPR001050 (PANTHER); IPR030479 (PROSITE_PATTERNS); CYTOPLASMIC_DOMAIN (PHOBIUS); TRANSMEMBRANE (PHOBIUS); NON_CYTOPLASMIC_DOMAIN (PHOBIUS); TMhelix (TMHMM)                                                                                                                                                                                                                                                                         |
| 1465 | 287308_length_873_cvg_36.8_tip_1_4 | 488  | histone -like                             | 291 | 3.26E-81  | 99.20% | 0.105   | IPR002119 (PRINTS); IPR002119 (SMART); IPR009072 (G3DSA:1.10.20.GENE3D); IPR007125 (PFAM); PTHR23430 (PANTHER); PTHR23430:SF34 (PANTHER); IPR002119 (PROSITE_PATTERNS); IPR009072 (SUPERFAMILY)                                                                                                                                                                                                                                                                                                   |
| 1466 | 287358_length_875_cvg_5.3_tip_1_0  | 52   | probable isocitrate dehydrogenase         | 292 | 8.62E-161 | 87.40% | 0.104   | IPR024084 (G3DSA:3.40.718.GENE3D); IPR024084 (PFAM); PTHR11835:SF39 (PANTHER); IPR001804 (PANTHER); IPR019818 (PROSITE_PATTERNS); SSF53659 (SUPERFAMILY)                                                                                                                                                                                                                                                                                                                                          |
| 1467 | 287400_length_876_cvg_6.2_tip_1_4  | 59   | copper chaperone for superoxide dismutase | 292 | 3.46E-80  | 73.20% | 0.169   | IPR001424 (PRINTS); IPR001424 (PFAM); IPR001424 (G3DSA:2.60.40.GENE3D); IPR006121 (PFAM); G3DSA:3.30.70.100 (GENE3D); PTHR10003 (PANTHER); IPR006121 (PROSITE_PROFILES); IPR001424 (SUPERFAMILY); IPR006121 (SUPERFAMILY)                                                                                                                                                                                                                                                                         |
| 1468 | 287422_length_877_cvg_6.3_tip_1_4  | 67   | macrophage mannose receptor partial       | 292 | 8.91E-27  | 47.50% | 0.14    | IPR001304 (SMART); IPR016186 (G3DSA:3.10.100.GENE3D); IPR001304 (PFAM); IPR016186 (G3DSA:3.10.100.GENE3D); PTHR22803 (PANTHER); PTHR22803:SF16 (PANTHER); IPR001304 (PROSITE_PROFILES); IPR001304 (PROSITE_PROFILES); IPR001304 (PROSITE_PROFILES); IPR016187 (SUPERFAMILY); IPR016187 (SUPERFAMILY); IPR016187 (SUPERFAMILY)                                                                                                                                                                     |
| 1469 | 287454_length_878_cvg_54.2_tip_1_5 | 1064 | cathepsin I                               | 292 | 1.44E-130 | 79.00% | 0.15    | IPR000668 (SMART); IPR013201 (SMART); IPR000668 (PFAM); G3DSA:3.90.70.10 (GENE3D); IPR013201 (PFAM); IPR013128 (PANTHER); PTHR12411:SF57 (PANTHER); IPR000169 (PROSITE_PATTERNS); CYTOPLASMIC_DOMAIN (PHOBIUS); TRANSMEMBRANE (PHOBIUS); NON_CYTOPLASMIC_DOMAIN (PHOBIUS); CYTOPLASMIC_DOMAIN (PHOBIUS); TRANSMEMBRANE (PHOBIUS); SSF54001 (SUPERFAMILY); TMhelix (TMHMM)                                                                                                                         |
| 1470 | 287522_length_879_cvg_11.9_tip_1_0 | 126  | protein shifted isoform x1                | 293 | 1.11E-80  | 87.70% | 0.143   | IPR013309 (PRINTS); IPR003306 (SMART); IPR003306 (PFAM); PTHR24838:SF276 (PANTHER); PTHR24838 (PANTHER); CYTOPLASMIC_DOMAIN (PHOBIUS); NON_CYTOPLASMIC_DOMAIN (PHOBIUS); TRANSMEMBRANE (PHOBIUS); NON_CYTOPLASMIC_DOMAIN (PHOBIUS); TRANSMEMBRANE (PHOBIUS); IPR003306 (PRODOM); IPR003306 (PROSITE_PROFILES); TMhelix (TMHMM)                                                                                                                                                                    |
| 1471 | 287570_length_881_cvg_13.4_tip_1_1 | 152  | lipophorin receptor isoform e             | 294 | 4.71E-13  | 53.10% | 0.786 Y | IPR002172 (PRINTS); IPR002172 (SMART); IPR002172 (G3DSA:4.10.400.GENE3D); IPR002172 (PFAM); IPR002172 (G3DSA:4.10.400.GENE3D); PTHR10529:SF208 (PANTHER); PTHR10529 (PANTHER); IPR023415 (PROSITE_PATTERNS); SIGNAL_PEPTIDE_C_REGION (PHOBIUS); SIGNAL_PEPTIDE (PHOBIUS); SIGNAL_PEPTIDE_H_REGION (PHOBIUS); NON_CYTOPLASMIC_DOMAIN (PHOBIUS); SIGNAL_PEPTIDE_N_REGION (PHOBIUS); IPR002172 (PROSITE_PROFILES); IPR002172 (PROSITE_PROFILES); SignalP-noTM (SIGNALP_EUK); IPR002172 (SUPERFAMILY) |
| 1472 | 287586_length_881_cvg_27.1_tip_1_3 | 351  | polyubiquitin-c-like isoform 2            | 294 | 1.82E-107 | 98.90% | 0.181   | IPR019956 (PRINTS); IPR000626 (SMART); G3DSA:3.10.20.90 (GENE3D); IPR000626 (PFAM); PTHR10666 (PANTHER); IPR019954 (PROSITE_PATTERNS); IPR019954 (PROSITE_PATTERNS); CYTOPLASMIC_DOMAIN (PHOBIUS); NON_CYTOPLASMIC_DOMAIN (PHOBIUS); TRANSMEMBRANE (PHOBIUS); IPR000626 (PROSITE_PROFILES); IPR000626 (PROSITE_PROFILES); IPR029071 (SUPERFAMILY); IPR029071 (SUPERFAMILY)                                                                                                                        |





|      |                                    |      |                                                           |     |           |        |         |                                                                                                                                                                                                                                                                                                                                                                                                                                                            |
|------|------------------------------------|------|-----------------------------------------------------------|-----|-----------|--------|---------|------------------------------------------------------------------------------------------------------------------------------------------------------------------------------------------------------------------------------------------------------------------------------------------------------------------------------------------------------------------------------------------------------------------------------------------------------------|
| 1486 | 288312_length_906_cvg_5.2_tip_1_5  | 58   | leucine-rich repeat-containing protein 15-like isoform x2 | 302 | 1.82E-56  | 59.80% | 0.104   | Coil (COILS); IPR003591 (SMART); G3DSA:3.80.10.10 (GENE3D); IPR001611 (PFAM); PTHR24373 (PANTHER); IPR001611 (PROSITE_PROFILES); IPR001611 (PROSITE_PROFILES); IPR001611 (PROSITE_PROFILES); SSF52058 (SUPERFAMILY)                                                                                                                                                                                                                                        |
| 1487 | 288352_length_907_cvg_8.8_tip_1_4  | 109  | ---NA---                                                  | 302 |           |        | 0.123   | CYTOPLASMIC_DOMAIN (PHOBIUS); TRANSMEMBRANE (PHOBIUS); NON_CYTOPLASMIC_DOMAIN (PHOBIUS)                                                                                                                                                                                                                                                                                                                                                                    |
| 1488 | 288372_length_907_cvg_6.2_tip_1_1  | 63   | collagen alpha-1 chain                                    | 302 | 1.73E-44  | 55.10% | 0.099   | IPR008160 (PFAM); PTHR24023:SF397 (PANTHER); PTHR24023 (PANTHER)                                                                                                                                                                                                                                                                                                                                                                                           |
| 1489 | 288372_length_907_cvg_6.2_tip_1_4  | 63   | mucin-2-like isoform x2                                   | 302 | 2.20E-38  | 44.40% | 0.137   | PTHR24023:SF405 (PANTHER); PTHR24023 (PANTHER)                                                                                                                                                                                                                                                                                                                                                                                                             |
| 1490 | 288390_length_908_cvg_79.6_tip_0_4 | 3230 | muscle m-line assembly protein unc-89-like                | 303 | 1.20E-80  | 75.70% | 0.101   | Coil (COILS); IPR003599 (SMART); IPR013783 (G3DSA:2.60.40.GENE3D); IPR013783 (G3DSA:2.60.40.GENE3D); IPR013098 (PFAM); PTHR19897:SF148 (PANTHER); PTHR19897 (PANTHER); IPR007110 (PROSITE_PROFILES); SSF48726 (SUPERFAMILY); SSF48726 (SUPERFAMILY); SSF48726 (SUPERFAMILY)                                                                                                                                                                                |
| 1491 | 288392_length_908_cvg_31.4_tip_1_1 | 336  | cell recognition protein caspr4 isoform 5                 | 303 | 2.92E-45  | 52.10% | 0.139   | IPR001073 (PFAM); IPR008983 (G3DSA:2.60.120.GENE3D); PTHR10127 (PANTHER); PTHR10127:SF575 (PANTHER); IPR001073 (PROSITE_PROFILES); IPR002181 (SUPERFAMILY); IPR008983 (SUPERFAMILY)                                                                                                                                                                                                                                                                        |
| 1492 | 288400_length_908_cvg_12.5_tip_1_3 | 142  | glycosyl-phosphatidylinositol-linked carbonic anhydrase   | 303 | 4.63E-54  | 67.90% | 0.11    | IPR001148 (SMART); IPR001148 (PFAM); IPR001148 (G3DSA:3.10.200.GENE3D); IPR023561 (PANTHER); IPR018338 (PROSITE_PATTERNS); IPR001148 (PROSITE_PROFILES); IPR001148 (SUPERFAMILY)                                                                                                                                                                                                                                                                           |
| 1493 | 288416_length_908_cvg_12.8_tip_1_4 | 149  | striatin- partial                                         | 303 | 3.52E-153 | 82.20% | 0.104   | IPR020472 (PRINTS); IPR001680 (SMART); IPR001680 (PFAM); IPR015943 (G3DSA:2.130.10.GENE3D); PTHR15653 (PANTHER); IPR019775 (PROSITE_PATTERNS); IPR017986 (PROSITE_PROFILES); IPR001680 (PROSITE_PROFILES); IPR001680 (PROSITE_PROFILES); IPR001680 (PROSITE_PROFILES); IPR017986 (SUPERFAMILY)                                                                                                                                                             |
| 1494 | 288488_length_912_cvg_13.0_tip_1_5 | 139  | cytochrome c oxidase assembly factor 7 homolog            | 304 | 3.49E-72  | 65.80% | 0.097   | Coil (COILS); IPR006597 (SMART); IPR006597 (PFAM); IPR011990 (G3DSA:1.25.40.GENE3D); PTHR13891:SF1 (PANTHER); PTHR13891 (PANTHER); SSF81901 (SUPERFAMILY)                                                                                                                                                                                                                                                                                                  |
| 1495 | 288508_length_912_cvg_74.6_tip_1_1 | 9441 | trypsinogen 2                                             | 304 | 2.00E-72  | 62.30% | 0.339   | IPR001314 (PRINTS); IPR001254 (SMART); G3DSA:2.40.10.10 (GENE3D); G3DSA:2.40.10.10 (GENE3D); IPR001254 (PFAM); G3DSA:2.40.10.10 (GENE3D); PTHR24265 (PANTHER); IPR001254 (PROSITE_PROFILES); SignalP-TM (SIGNALP_GRAM_POSITIVE); IPR009003 (SUPERFAMILY)                                                                                                                                                                                                   |
| 1496 | 288512_length_912_cvg_4.6_tip_1_0  | 54   | isoform cra_a                                             | 304 | 3.65E-14  | 52.90% | 0.203   | no IPS match                                                                                                                                                                                                                                                                                                                                                                                                                                               |
| 1497 | 288512_length_912_cvg_4.6_tip_1_3  | 54   | coagulation factor v                                      | 304 | 1.57E-17  | 49.00% | 0.145   | TRANSMEMBRANE (PHOBIUS); TRANSMEMBRANE (PHOBIUS); TRANSMEMBRANE (PHOBIUS); TRANSMEMBRANE (PHOBIUS); NON_CYTOPLASMIC_DOMAIN (PHOBIUS); TRANSMEMBRANE (PHOBIUS); CYTOPLASMIC_DOMAIN (PHOBIUS); NON_CYTOPLASMIC_DOMAIN (PHOBIUS); CYTOPLASMIC_DOMAIN (PHOBIUS); NON_CYTOPLASMIC_DOMAIN (PHOBIUS); NON_CYTOPLASMIC_DOMAIN (PHOBIUS); TRANSMEMBRANE (PHOBIUS); CYTOPLASMIC_DOMAIN (PHOBIUS); TMhelix (TMHMM); TMhelix (TMHMM); TMhelix (TMHMM); TMhelix (TMHMM) |
| 1498 | 288512_length_912_cvg_4.6_tip_1_4  | 54   | coagulation factor v                                      | 304 | 7.65E-19  | 44.10% | 0.167   | NON_CYTOPLASMIC_DOMAIN (PHOBIUS); CYTOPLASMIC_DOMAIN (PHOBIUS); TRANSMEMBRANE (PHOBIUS); NON_CYTOPLASMIC_DOMAIN (PHOBIUS); TRANSMEMBRANE (PHOBIUS); NON_CYTOPLASMIC_DOMAIN (PHOBIUS); TRANSMEMBRANE (PHOBIUS); CYTOPLASMIC_DOMAIN (PHOBIUS); TRANSMEMBRANE (PHOBIUS); CYTOPLASMIC_DOMAIN (PHOBIUS); TMhelix (TMHMM); TMhelix (TMHMM); TMhelix (TMHMM)                                                                                                      |
| 1499 | 288512_length_912_cvg_4.6_tip_1_5  | 54   | coagulation factor v                                      | 304 | 2.51E-10  | 45.70% | 0.506 Y | CYTOPLASMIC_DOMAIN (PHOBIUS); TRANSMEMBRANE (PHOBIUS); NON_CYTOPLASMIC_DOMAIN (PHOBIUS); TRANSMEMBRANE (PHOBIUS); SIGNAL_PEPTIDE (PHOBIUS); NON_CYTOPLASMIC_DOMAIN (PHOBIUS); SIGNAL_PEPTIDE_H_REGION (PHOBIUS); SIGNAL_PEPTIDE_N_REGION (PHOBIUS); SIGNAL_PEPTIDE_C_REGION (PHOBIUS); CYTOPLASMIC_DOMAIN (PHOBIUS); TRANSMEMBRANE (PHOBIUS); SignalP-TM (SIGNALP_EUK)                                                                                     |
| 1500 | 288520_length_913_cvg_27.3_tip_1_5 | 249  | aldo-keto reductase family 1 member b10                   | 304 | 2.54E-127 | 76.80% | 0.099   | IPR020471 (PRINTS); IPR023210 (G3DSA:3.20.20.GENE3D); IPR023210 (PFAM); IPR020471 (PIRSF); PTHR11732:SF202 (PANTHER); IPR001395 (PANTHER); IPR018170 (PROSITE_PATTERNS); IPR018170 (PROSITE_PATTERNS); IPR023210 (SUPERFAMILY)                                                                                                                                                                                                                             |

|      |                                    |        |                                                      |     |           |        |         |                                                                                                                                                                                                                                                                                                                                                                                                                                                                |
|------|------------------------------------|--------|------------------------------------------------------|-----|-----------|--------|---------|----------------------------------------------------------------------------------------------------------------------------------------------------------------------------------------------------------------------------------------------------------------------------------------------------------------------------------------------------------------------------------------------------------------------------------------------------------------|
| 1501 | 288536_length_913_cvg_2.7_tip_1_3  | 38     | very low-density lipoprotein receptor                | 305 | 6.24E-18  | 42.00% | 0.114   | IPR002172 (PRINTS); IPR002172 (SMART); IPR002172 (G3DSA:4.10.400.GENE3D); IPR002172 (PFAM); IPR002172 (G3DSA:4.10.400.GENE3D); PTHR10529 (PANTHER); IPR023415 (PROSITE_PATTERNS); IPR023415 (PROSITE_PATTERNS); IPR023415 (PROSITE_PATTERNS); IPR002172 (PROSITE_PROFILES); IPR002172 (PROSITE_PROFILES); IPR002172 (PROSITE_PROFILES); IPR002172 (PROSITE_PROFILES); IPR002172 (SUPERFAMILY); IPR002172 (SUPERFAMILY); IPR002172 (SUPERFAMILY)                |
| 1502 | 288570_length_914_cvg_10.9_tip_1_3 | 94     | adp-ribosylation factor 6                            | 305 | 7.15E-124 | 99.60% | 0.535 Y | IPR006689 (PRINTS); IPR003579 (SMART); IPR006687 (SMART); IPR024156 (SMART); IPR005225 (TIGRFAM); IPR027417 (G3DSA:3.40.50.GENE3D); IPR006689 (PFAM); PTHR11711:SF106 (PANTHER); PTHR11711 (PANTHER); IPR024156 (PROSITE_PROFILES); SignalP-noTM (SIGNALP_EUK); IPR027417 (SUPERFAMILY)                                                                                                                                                                        |
| 1503 | 288726_length_920_cvg_6.8_tip_1_2  | 76     | fasciclin-2 isoform x6                               | 306 | 1.34E-14  | 55.80% | 0.113   | IPR003599 (SMART); IPR003598 (SMART); IPR013783 (G3DSA:2.60.40.GENE3D); IPR013098 (PFAM); PF13895 (PFAM); PTHR19831 (PANTHER); NON_CYTOPLASMIC_DOMAIN (PHOBIUS); CYTOPLASMIC_DOMAIN (PHOBIUS); TRANSMEMBRANE (PHOBIUS); IPR007110 (PROSITE_PROFILES); IPR007110 (PROSITE_PROFILES); SSF48726 (SUPERFAMILY); SSF48726 (SUPERFAMILY); TMhelix (TMHMM)                                                                                                            |
| 1504 | 288742_length_920_cvg_12.8_tip_1_2 | 460    | hemagglutinin amebocyte aggregation factor-like      | 306 | 1.63E-08  | 69.20% | 0.105   | Coil (COILS); PF14704 (PFAM); IPR026645 (PANTHER); CYTOPLASMIC_DOMAIN (PHOBIUS); TRANSMEMBRANE (PHOBIUS); TRANSMEMBRANE (PHOBIUS); NON_CYTOPLASMIC_DOMAIN (PHOBIUS); TRANSMEMBRANE (PHOBIUS); TRANSMEMBRANE (PHOBIUS); NON_CYTOPLASMIC_DOMAIN (PHOBIUS); TRANSMEMBRANE (PHOBIUS); CYTOPLASMIC_DOMAIN (PHOBIUS); CYTOPLASMIC_DOMAIN (PHOBIUS); NON_CYTOPLASMIC_DOMAIN (PHOBIUS); TMhelix (TMHMM); TMhelix (TMHMM); TMhelix (TMHMM)                              |
| 1505 | 288746_length_921_cvg_8.4_tip_1_0  | 87     | ion transport peptide-like                           | 307 | 1.72E-26  | 69.70% | 0.157   | IPR001166 (PRINTS); IPR001166 (G3DSA:1.10.2010.GENE3D); IPR001166 (PFAM); CYTOPLASMIC_DOMAIN (PHOBIUS); NON_CYTOPLASMIC_DOMAIN (PHOBIUS); TRANSMEMBRANE (PHOBIUS); IPR001166 (SUPERFAMILY); TMhelix (TMHMM)                                                                                                                                                                                                                                                    |
| 1506 | 288746_length_921_cvg_8.4_tip_1_2  | 87     | ion transport peptide isoform x2                     | 307 | 6.99E-06  | 86.00% | 0.357 Y | IPR001166 (PFAM); IPR001166 (G3DSA:1.10.2010.GENE3D); IPR001166 (SUPERFAMILY)                                                                                                                                                                                                                                                                                                                                                                                  |
| 1507 | 288792_length_921_cvg_6.5_tip_1_5  | 67     | allatostatin precursor                               | 307 | 1.65E-06  | 48.00% | 0.104   | TRANSMEMBRANE (PHOBIUS); NON_CYTOPLASMIC_DOMAIN (PHOBIUS); TRANSMEMBRANE (PHOBIUS); CYTOPLASMIC_DOMAIN (PHOBIUS); CYTOPLASMIC_DOMAIN (PHOBIUS)                                                                                                                                                                                                                                                                                                                 |
| 1508 | 288800_length_921_cvg_26.4_tip_1_1 | 299    | gamma-interferon-inducible lysosomal thiol reductase | 307 | 3.42E-50  | 57.10% | 0.282   | IPR004911 (PFAM); PTHR13234:SF8 (PANTHER); IPR004911 (PANTHER); SIGNAL_PEPTIDE_C_REGION (PHOBIUS); SIGNAL_PEPTIDE_H_REGION (PHOBIUS); SIGNAL_PEPTIDE_N_REGION (PHOBIUS); NON_CYTOPLASMIC_DOMAIN (PHOBIUS); SIGNAL_PEPTIDE (PHOBIUS)                                                                                                                                                                                                                            |
| 1509 | 288828_length_923_cvg_13.7_tip_1_4 | 132    | serine protease                                      | 308 | 8.64E-106 | 73.80% | 0.114   | IPR008758 (PFAM); PTHR11010:SF9 (PANTHER); IPR008758 (PANTHER); TRANSMEMBRANE (PHOBIUS); CYTOPLASMIC_DOMAIN (PHOBIUS); NON_CYTOPLASMIC_DOMAIN (PHOBIUS)                                                                                                                                                                                                                                                                                                        |
| 1510 | 288842_length_923_cvg_3.6_tip_1_1  | 47     | n-alpha-acetyltransferase auxiliary subunit          | 308 | 5.56E-116 | 75.40% | 0.112   | IPR011990 (G3DSA:1.25.40.GENE3D); PTHR22767 (PANTHER); PTHR22767:SF3 (PANTHER); IPR013026 (PROSITE_PROFILES); SSF48452 (SUPERFAMILY)                                                                                                                                                                                                                                                                                                                           |
| 1511 | 288876_length_925_cvg_9.2_tip_1_4  | 103    | steroid membrane receptor 25-                        | 308 | 4.43E-64  | 81.50% | 0.119   | IPR001199 (G3DSA:3.10.120.GENE3D); IPR001199 (PFAM); PTHR10281 (PANTHER); PTHR10281:SF25 (PANTHER); IPR001199 (SUPERFAMILY)                                                                                                                                                                                                                                                                                                                                    |
| 1512 | 288904_length_925_cvg_88.5_tip_1_1 | 134475 | hemocyanin subunit type 1 precursor                  | 308 | 7.50E-124 | 69.30% | 0.115   | IPR005203 (PFAM); IPR005203 (G3DSA:2.60.40.GENE3D); IPR013788 (PANTHER); IPR014756 (SUPERFAMILY)                                                                                                                                                                                                                                                                                                                                                               |
| 1513 | 288958_length_927_cvg_4.0_tip_1_1  | 52     | zinc finger protein 275                              | 309 | 1.05E-20  | 57.50% | 0.113   | IPR015880 (SMART); IPR013087 (G3DSA:3.30.160.GENE3D); PF13894 (PFAM); PF13913 (PFAM); IPR007087 (PFAM); IPR013087 (G3DSA:3.30.160.GENE3D); PTHR24409 (PANTHER); IPR007087 (PROSITE_PATTERNS); IPR007087 (PROSITE_PATTERNS); IPR007087 (PROSITE_PATTERNS); IPR007087 (PROSITE_PATTERNS); IPR007087 (PROSITE_PROFILES); IPR007087 (PROSITE_PROFILES); IPR007087 (PROSITE_PROFILES); IPR007087 (PROSITE_PROFILES); SSF57667 (SUPERFAMILY); SSF57667 (SUPERFAMILY) |
| 1514 | 288990_length_929_cvg_12.6_tip_1_3 | 115    | prolyl 3-hydroxylase 1-like isoform x2               | 310 | 3.27E-115 | 68.70% | 0.102   | IPR011990 (G3DSA:1.25.40.GENE3D); PTHR13986:SF8 (PANTHER); PTHR13986 (PANTHER)                                                                                                                                                                                                                                                                                                                                                                                 |
| 1515 | 289056_length_930_cvg_6.1_tip_1_2  | 51     | dipeptidyl aminopeptidase-like protein 6 isoform x1  | 310 | 2.00E-83  | 62.70% | 0.104   | IPR002469 (G3DSA:2.140.10.GENE3D); IPR002469 (PFAM); PTHR11731 (PANTHER); PTHR11731:SF22 (PANTHER); TRANSMEMBRANE (PHOBIUS); NON_CYTOPLASMIC_DOMAIN (PHOBIUS); CYTOPLASMIC_DOMAIN (PHOBIUS); SSF82171 (SUPERFAMILY); TMhelix (TMHMM)                                                                                                                                                                                                                           |



|      |                                    |     |                                                    |     |           |        |         |                                                                                                                                                                                                                                                                                                                                                                                                                                                                                                                                                                                                                                                                                                                                                                                                                            |
|------|------------------------------------|-----|----------------------------------------------------|-----|-----------|--------|---------|----------------------------------------------------------------------------------------------------------------------------------------------------------------------------------------------------------------------------------------------------------------------------------------------------------------------------------------------------------------------------------------------------------------------------------------------------------------------------------------------------------------------------------------------------------------------------------------------------------------------------------------------------------------------------------------------------------------------------------------------------------------------------------------------------------------------------|
| 1524 | 289314_length_941_cvg_9.3_tip_1_0  | 120 | macrophage mannose receptor 1                      | 314 | 9.39E-53  | 51.60% | 0.12    | IPR002352 (PRINTS); IPR001304 (SMART); IPR016186 (G3DSA:3.10.100.GENE3D); IPR016186 (G3DSA:3.10.100.GENE3D); IPR001304 (PFAM); IPR016186 (G3DSA:3.10.100.GENE3D); PTHR22803:SF16 (PANTHER); PTHR22803 (PANTHER); IPR018378 (PROSITE_PATTERNS); IPR001304 (PROSITE_PROFILES); IPR001304 (PROSITE_PROFILES); IPR016187 (SUPERFAMILY); IPR016187 (SUPERFAMILY)                                                                                                                                                                                                                                                                                                                                                                                                                                                                |
| 1525 | 289320_length_941_cvg_3.9_tip_1_3  | 44  | epidermal growth factor receptor isoform x1        | 314 | 5.60E-93  | 65.00% | 0.137   | IPR001245 (PFAM); G3DSA:1.10.510.10 (GENE3D); PTHR24416:SF90 (PANTHER); PTHR24416 (PANTHER); IPR000719 (PROSITE_PROFILES); IPR011009 (SUPERFAMILY)                                                                                                                                                                                                                                                                                                                                                                                                                                                                                                                                                                                                                                                                         |
| 1527 | 289336_length_942_cvg_25.6_tip_1_4 | 261 | sulfakinin-like peptide                            | 314 | 1.02E-15  | 65.70% | 0.198   | IPR013152 (PROSITE_PATTERNS); IPR013152 (PROSITE_PATTERNS); CYTOPLASMIC_DOMAIN (PHOBIUS); TRANSMEMBRANE (PHOBIUS); NON_CYTOPLASMIC_DOMAIN (PHOBIUS); TMhelix (TMHMM)                                                                                                                                                                                                                                                                                                                                                                                                                                                                                                                                                                                                                                                       |
| 1528 | 289494_length_947_cvg_57.0_tip_1_2 | 922 | mitochondrial manganese superoxide dismutase       | 315 | 1.01E-121 | 86.10% | 0.122   | Coil (COILS); IPR001189 (PRINTS); G3DSA:1.10.287.990 (GENE3D); IPR019832 (PFAM); IPR019831 (PFAM); PTHR11404:SF6 (PANTHER); IPR001189 (PANTHER); IPR019833 (PROSITE_PATTERNS); TRANSMEMBRANE (PHOBIUS); CYTOPLASMIC_DOMAIN (PHOBIUS); NON_CYTOPLASMIC_DOMAIN (PHOBIUS); IPR019831 (SUPERFAMILY); IPR019832 (SUPERFAMILY); TMhelix (TMHMM)                                                                                                                                                                                                                                                                                                                                                                                                                                                                                  |
| 1529 | 289548_length_948_cvg_61.0_tip_1_3 | 843 | coagulation factor v                               | 316 | 2.61E-09  | 45.00% | 0.510 Y | CYTOPLASMIC_DOMAIN (PHOBIUS); NON_CYTOPLASMIC_DOMAIN (PHOBIUS); TRANSMEMBRANE (PHOBIUS); NON_CYTOPLASMIC_DOMAIN (PHOBIUS); SIGNAL_PEPTIDE (PHOBIUS); SIGNAL_PEPTIDE_C_REGION (PHOBIUS); SIGNAL_PEPTIDE_H_REGION (PHOBIUS); CYTOPLASMIC_DOMAIN (PHOBIUS); TRANSMEMBRANE (PHOBIUS); TRANSMEMBRANE (PHOBIUS); NON_CYTOPLASMIC_DOMAIN (PHOBIUS); TRANSMEMBRANE (PHOBIUS); NON_CYTOPLASMIC_DOMAIN (PHOBIUS); SIGNAL_PEPTIDE_N_REGION (PHOBIUS); CYTOPLASMIC_DOMAIN (PHOBIUS); TRANSMEMBRANE (PHOBIUS); CYTOPLASMIC_DOMAIN (PHOBIUS); NON_CYTOPLASMIC_DOMAIN (PHOBIUS); TRANSMEMBRANE (PHOBIUS); CYTOPLASMIC_DOMAIN (PHOBIUS); TRANSMEMBRANE (PHOBIUS); TRANSMEMBRANE (PHOBIUS); SignalP-TM (SIGNALP_EUK); TMhelix (TMHMM); TMhelix (TMHMM); TMhelix (TMHMM); TMhelix (TMHMM); TMhelix (TMHMM); TMhelix (TMHMM); TMhelix (TMHMM) |
| 1533 | 289596_length_950_cvg_4.8_tip_1_2  | 68  | membrane glycoprotein lig-                         | 316 | 1.84E-17  | 46.60% | 0.725 Y | IPR003591 (SMART); IPR001611 (PFAM); G3DSA:3.80.10.10 (GENE3D); PTHR24365 (PANTHER); NON_CYTOPLASMIC_DOMAIN (PHOBIUS); SIGNAL_PEPTIDE_N_REGION (PHOBIUS); SIGNAL_PEPTIDE_H_REGION (PHOBIUS); SIGNAL_PEPTIDE_C_REGION (PHOBIUS); IPR001611 (PROSITE_PROFILES); IPR001611 (PROSITE_PROFILES); IPR001611 (PROSITE_PROFILES); IPR001611 (PROSITE_PROFILES); SignalP-noTM (SIGNALP_EUK); SSF52058 (SUPERFAMILY)                                                                                                                                                                                                                                                                                                                                                                                                                 |
| 1530 | 289576_length_950_cvg_31.1_tip_1_3 | 428 | aael000271- partial                                | 317 | 2.81E-71  | 67.70% | 0.111   | IPR029062 (G3DSA:3.40.50.GENE3D); IPR011697 (PFAM); IPR015527 (PANTHER); IPR015527 (PROSITE_PROFILES); IPR029062 (SUPERFAMILY)                                                                                                                                                                                                                                                                                                                                                                                                                                                                                                                                                                                                                                                                                             |
| 1531 | 289586_length_950_cvg_4.0_tip_1_4  | 43  | plexin- partial                                    | 317 | 7.98E-100 | 78.40% | 0.116   | IPR002909 (SMART); IPR013783 (G3DSA:2.60.40.GENE3D); IPR002909 (PFAM); IPR013783 (G3DSA:2.60.40.GENE3D); PTHR22625 (PANTHER); PTHR22625:SF16 (PANTHER); IPR014756 (SUPERFAMILY); IPR014756 (SUPERFAMILY)                                                                                                                                                                                                                                                                                                                                                                                                                                                                                                                                                                                                                   |
| 1532 | 289590_length_950_cvg_10.0_tip_1_4 | 134 | prohormone-1-like                                  | 317 | 6.87E-30  | 83.90% | 0.115   | no IPS match                                                                                                                                                                                                                                                                                                                                                                                                                                                                                                                                                                                                                                                                                                                                                                                                               |
| 1534 | 289612_length_951_cvg_8.5_tip_1_3  | 92  | low-density lipoprotein receptor-related protein 2 | 317 | 2.19E-23  | 58.80% | 0.102   | IPR002172 (PRINTS); IPR002172 (SMART); IPR002172 (G3DSA:4.10.400.GENE3D); IPR002172 (G3DSA:4.10.400.GENE3D); IPR002172 (PFAM); PTHR10529 (PANTHER); IPR023415 (PROSITE_PATTERNS); NON_CYTOPLASMIC_DOMAIN (PHOBIUS); CYTOPLASMIC_DOMAIN (PHOBIUS); TRANSMEMBRANE (PHOBIUS); IPR002172 (PROSITE_PROFILES); IPR002172 (PROSITE_PROFILES); SignalP-TM (SIGNALP_GRAM_POSITIVE); IPR002172 (SUPERFAMILY); IPR002172 (SUPERFAMILY); IPR002172 (SUPERFAMILY); TMhelix (TMHMM)                                                                                                                                                                                                                                                                                                                                                      |





|      |                                    |      |                                                                    |     |           |        |         |                                                                                                                                                                                                                                                                                                                                                                                                                                                                                                    |
|------|------------------------------------|------|--------------------------------------------------------------------|-----|-----------|--------|---------|----------------------------------------------------------------------------------------------------------------------------------------------------------------------------------------------------------------------------------------------------------------------------------------------------------------------------------------------------------------------------------------------------------------------------------------------------------------------------------------------------|
| 1548 | 290036_length_969_cvg_4.0_tip_1_1  | 44   | peptidylprolyl isomerase domain and wd repeat-containing protein 1 | 323 | 0         | 88.60% | 0.132   | IPR002130 (PRINTS); IPR002130 (PFAM); IPR015943 (G3DSA:2.130.10.GENE3D); IPR029000 (G3DSA:2.40.100.GENE3D); PTHR11071:SF228 (PANTHER); IPR024936 (PANTHER); IPR002130 (PROSITE_PROFILES); IPR029000 (SUPERFAMILY); SSF69322 (SUPERFAMILY)                                                                                                                                                                                                                                                          |
| 1549 | 290064_length_970_cvg_3.6_tip_1_1  | 46   | slit homolog 3 protein                                             | 323 | 1.26E-08  | 47.40% | 0.122   | IPR001611 (PFAM); G3DSA:3.80.10.10 (GENE3D); PTHR24365 (PANTHER); PTHR24365:SF265 (PANTHER); CYTOPLASMIC_DOMAIN (PHOBIUS); NON_CYTOPLASMIC_DOMAIN (PHOBIUS); TRANSMEMBRANE (PHOBIUS); SSF52058 (SUPERFAMILY); TMhelix (TMHMM); TMhelix (TMHMM)                                                                                                                                                                                                                                                     |
| 1550 | 290110_length_972_cvg_21.6_tip_1_5 | 260  | plcl_mytga ame: full=perlucin-like protein flags: precursor        | 324 | 9.99E-13  | 44.50% | 0.296   | IPR001304 (SMART); IPR001304 (PFAM); IPR016186 (G3DSA:3.10.100.GENE3D); PTHR22802 (PANTHER); IPR001304 (PROSITE_PROFILES); IPR016187 (SUPERFAMILY)                                                                                                                                                                                                                                                                                                                                                 |
| 1551 | 290130_length_973_cvg_2.7_tip_1_5  | 42   | trypsin-1- partial                                                 | 324 | 1.20E-46  | 54.20% | 0.318   | IPR001314 (PRINTS); IPR001254 (SMART); G3DSA:2.40.10.10 (GENE3D); G3DSA:2.40.10.10 (GENE3D); G3DSA:2.40.10.10 (GENE3D); IPR001254 (PFAM); PTHR24265 (PANTHER); IPR018114 (PROSITE_PATTERNS); TRANSMEMBRANE (PHOBIUS); CYTOPLASMIC_DOMAIN (PHOBIUS); CYTOPLASMIC_DOMAIN (PHOBIUS); TRANSMEMBRANE (PHOBIUS); NON_CYTOPLASMIC_DOMAIN (PHOBIUS); IPR001254 (PROSITE_PROFILES); IPR009003 (SUPERFAMILY); TMhelix (TMHMM)                                                                                |
| 1556 | 290198_length_974_cvg_3.4_tip_1_2  | 46   | cub domain protein                                                 | 324 | 7.82E-11  | 47.80% | 0.102   | IPR000859 (SMART); IPR000859 (G3DSA:2.60.120.GENE3D); IPR000859 (PFAM); PTHR10127 (PANTHER); IPR000859 (PROSITE_PROFILES); IPR000859 (SUPERFAMILY)                                                                                                                                                                                                                                                                                                                                                 |
| 1552 | 290152_length_973_cvg_4.9_tip_1_3  | 63   | sulfhydryl oxidase 1-like                                          | 325 | 3.25E-65  | 64.40% | 0.135   | IPR013766 (PFAM); IPR012336 (G3DSA:3.40.30.GENE3D); IPR012336 (G3DSA:3.40.30.GENE3D); PTHR22897 (PANTHER); IPR012336 (PROSITE_PROFILES); IPR012336 (SUPERFAMILY)                                                                                                                                                                                                                                                                                                                                   |
| 1553 | 290168_length_974_cvg_5.5_tip_1_1  | 62   | zinc finger protein zpr1                                           | 325 | 1.28E-128 | 73.50% | 0.113   | IPR004457 (SMART); IPR004457 (TIGRFAM); IPR004457 (PFAM); PTHR10876 (PANTHER); PTHR10876:SF0 (PANTHER)                                                                                                                                                                                                                                                                                                                                                                                             |
| 1554 | 290176_length_974_cvg_70.9_tip_1_1 | 3207 | trypsinogen h2_1g                                                  | 325 | 1.15E-58  | 57.10% | 0.934 Y | IPR001314 (PRINTS); IPR001254 (SMART); G3DSA:2.40.10.10 (GENE3D); IPR001254 (PFAM); G3DSA:2.40.10.10 (GENE3D); PTHR24265 (PANTHER); TRANSMEMBRANE (PHOBIUS); CYTOPLASMIC_DOMAIN (PHOBIUS); NON_CYTOPLASMIC_DOMAIN (PHOBIUS); IPR001254 (PROSITE_PROFILES); SignalP-noTM (SIGNALP_EUK); IPR009003 (SUPERFAMILY); TMhelix (TMHMM)                                                                                                                                                                    |
| 1555 | 290196_length_974_cvg_6.5_tip_1_3  | 75   | serine protease inhibitor                                          | 325 | 8.01E-09  | 68.00% | 0.121   | G3DSA:2.30.39.10 (GENE3D); IPR023796 (PFAM); IPR000215 (PANTHER); PTHR11461:SF52 (PANTHER); IPR023795 (PROSITE_PATTERNS); IPR023796 (SUPERFAMILY)                                                                                                                                                                                                                                                                                                                                                  |
| 1557 | 290236_length_976_cvg_32.7_tip_1_0 | 415  | protein them6                                                      | 326 | 2.40E-36  | 58.40% | 0.129   | Coil (COILS); IPR029069 (G3DSA:3.10.129.GENE3D); PF13279 (PFAM); PTHR12475 (PANTHER); NON_CYTOPLASMIC_DOMAIN (PHOBIUS); CYTOPLASMIC_DOMAIN (PHOBIUS); TRANSMEMBRANE (PHOBIUS); IPR029069 (SUPERFAMILY); TMhelix (TMHMM)                                                                                                                                                                                                                                                                            |
| 1558 | 290312_length_978_cvg_36.7_tip_1_0 | 465  | cytochrome p450 2j2-like                                           | 326 | 9.16E-47  | 64.90% | 0.099   | IPR002401 (PRINTS); IPR001128 (PRINTS); IPR001128 (G3DSA:1.10.630.GENE3D); IPR001128 (PFAM); PTHR24300 (PANTHER); IPR017972 (PROSITE_PATTERNS); IPR001128 (SUPERFAMILY)                                                                                                                                                                                                                                                                                                                            |
| 1559 | 290322_length_978_cvg_30.3_tip_1_4 | 368  | thioredoxin-dependent peroxide reductase                           | 326 | 1.76E-126 | 84.70% | 0.172   | IPR000866 (PFAM); IPR019479 (PFAM); IPR012336 (G3DSA:3.40.30.GENE3D); PTHR10681 (PANTHER); PTHR10681:SF101 (PANTHER); IPR012336 (PROSITE_PROFILES); IPR012336 (SUPERFAMILY)                                                                                                                                                                                                                                                                                                                        |
| 1560 | 290430_length_982_cvg_5.2_tip_1_0  | 69   | protein phosphatase 1 regulatory subunit 16a                       | 328 | 1.03E-62  | 63.20% | 0.223   | IPR002110 (SMART); IPR020683 (G3DSA:1.25.40.GENE3D); IPR020683 (PFAM); PTHR24186 (PANTHER); IPR002110 (PROSITE_PROFILES); IPR002110 (PROSITE_PROFILES); IPR020683 (PROSITE_PROFILES); IPR020683 (SUPERFAMILY)                                                                                                                                                                                                                                                                                      |
| 1561 | 290470_length_985_cvg_2.6_tip_1_4  | 44   | vascular endothelial growth factor receptor 1 isoform x1           | 328 | 2.32E-18  | 49.80% | 0.287   | IPR003599 (SMART); IPR013783 (G3DSA:2.60.40.GENE3D); IPR013783 (G3DSA:2.60.40.GENE3D); PTHR15360 (PANTHER); IPR007110 (PROSITE_PROFILES); SSF48726 (SUPERFAMILY); SSF48726 (SUPERFAMILY)                                                                                                                                                                                                                                                                                                           |
| 1562 | 290490_length_986_cvg_28.2_tip_1_3 | 336  | mesencephalic astrocyte-derived neurotrophic factor homolog        | 329 | 2.64E-77  | 85.10% | 0.794 Y | IPR019345 (PFAM); IPR011001 (G3DSA:1.10.225.GENE3D); PTHR12990 (PANTHER); PTHR12990:SF5 (PANTHER); NON_CYTOPLASMIC_DOMAIN (PHOBIUS); SIGNAL_PEPTIDE_N_REGION (PHOBIUS); SIGNAL_PEPTIDE_C_REGION (PHOBIUS); SIGNAL_PEPTIDE_H_REGION (PHOBIUS); SIGNAL_PEPTIDE (PHOBIUS); SignalP-noTM (SIGNALP_EUK); SSF68906 (SUPERFAMILY)                                                                                                                                                                         |
| 1563 | 290518_length_987_cvg_24.0_tip_1_0 | 296  | venom allergen 3-like                                              | 329 | 1.16E-48  | 55.00% | 0.792 Y | IPR001283 (PRINTS); IPR002413 (PRINTS); IPR014044 (SMART); IPR014044 (G3DSA:3.40.33.GENE3D); IPR014044 (PFAM); IPR001283 (PANTHER); IPR018244 (PROSITE_PATTERNS); IPR018244 (PROSITE_PATTERNS); SIGNAL_PEPTIDE (PHOBIUS); NON_CYTOPLASMIC_DOMAIN (PHOBIUS); SIGNAL_PEPTIDE_C_REGION (PHOBIUS); SIGNAL_PEPTIDE_H_REGION (PHOBIUS); SIGNAL_PEPTIDE_N_REGION (PHOBIUS); SignalP-noTM (SIGNALP_GRAM_NEGATIVE); SignalP-noTM (SIGNALP_EUK); SignalP-TM (SIGNALP_GRAM_POSITIVE); IPR014044 (SUPERFAMILY) |

|      |                                     |       |                                                        |     |           |         |         |                                                                                                                                                                                                                                                                                                                                                                                                                                                                                                                                                 |
|------|-------------------------------------|-------|--------------------------------------------------------|-----|-----------|---------|---------|-------------------------------------------------------------------------------------------------------------------------------------------------------------------------------------------------------------------------------------------------------------------------------------------------------------------------------------------------------------------------------------------------------------------------------------------------------------------------------------------------------------------------------------------------|
| 1564 | 290568_length_989_cvg_52.5_tip_0_3  | 2172  | 14-3-3 partial                                         | 330 | 1.43E-27  | 100.00% | 0.113   | G3DSA:1.20.190.20 (GENE3D); IPR023410 (PFAM); IPR000308 (PANTHER); PTHR18860:SF21 (PANTHER); IPR023409 (PROSITE_PATTERNS); IPR023410 (SUPERFAMILY)                                                                                                                                                                                                                                                                                                                                                                                              |
| 1565 | 290586_length_990_cvg_55.1_tip_1_3  | 28480 | chitinase partial                                      | 330 | 6.46E-51  | 59.90%  | 0.104   | IPR002557 (SMART); IPR002557 (G3DSA:2.170.140.GENE3D); IPR029070 (G3DSA:3.10.50.GENE3D); IPR002557 (PFAM); IPR001223 (PFAM); IPR013781 (G3DSA:3.20.20.GENE3D); PTHR11177 (PANTHER); PTHR11177:SF112 (PANTHER); IPR002557 (PROSITE_PROFILES); IPR017853 (SUPERFAMILY); IPR002557 (SUPERFAMILY); IPR029070 (SUPERFAMILY)                                                                                                                                                                                                                          |
| 1566 | 290588_length_990_cvg_5.0_tip_1_0   | 52    | coiled-coil domain-containing protein 134-like         | 330 | 1.02E-53  | 65.10%  | 0.148   | IPR026321 (PFAM); IPR026321 (PANTHER); CYTOPLASMIC_DOMAIN (PHOBIUS); TRANSMEMBRANE (PHOBIUS); NON_CYTOPLASMIC_DOMAIN (PHOBIUS)                                                                                                                                                                                                                                                                                                                                                                                                                  |
| 1567 | 290598_length_990_cvg_14.6_tip_0_5  | 149   | nidogen- partial                                       | 330 | 8.40E-109 | 62.50%  | 0.104   | IPR000742 (SMART); IPR000033 (SMART); IPR024731 (PFAM); IPR011042 (G3DSA:2.120.10.GENE3D); IPR023413 (G3DSA:2.40.155.GENE3D); PTHR24044 (PANTHER); PTHR24044:SF253 (PANTHER); IPR013032 (PROSITE_PATTERNS); IPR013032 (PROSITE_PATTERNS); IPR013032 (PROSITE_PATTERNS); IPR013032 (PROSITE_PATTERNS); IPR013032 (PROSITE_PATTERNS); IPR000742 (PROSITE_PROFILES); IPR000742 (PROSITE_PROFILES); IPR000742 (PROSITE_PROFILES); IPR000742 (PROSITE_PROFILES); IPR000742 (PROSITE_PROFILES); IPR000033 (PROSITE_PROFILES); IPR009030 (SUPERFAMILY) |
| 1568 | 290606_length_990_cvg_10.8_tip_1_1  | 139   | collagen alpha-1 chain                                 | 330 | 1.59E-14  | 58.10%  | 0.244   | IPR002172 (SMART); IPR002172 (PFAM); IPR002172 (G3DSA:4.10.400.GENE3D); IPR008160 (PFAM); PTHR24023:SF372 (PANTHER); PTHR24023 (PANTHER); IPR023415 (PROSITE_PATTERNS); IPR002172 (PROSITE_PROFILES); IPR002172 (SUPERFAMILY)                                                                                                                                                                                                                                                                                                                   |
| 1569 | 290606_length_990_cvg_10.8_tip_1_3  | 139   | serine-aspartate repeat protein f                      | 330 | 2.33E-21  | 46.50%  | 0.102   | no IPS match                                                                                                                                                                                                                                                                                                                                                                                                                                                                                                                                    |
| 1570 | 290650_length_992_cvg_58.0_tip_1_1  | 3075  | peptidyl-prolyl cis-trans isomerase                    | 331 | 1.63E-101 | 92.50%  | 0.32    | IPR002130 (PRINTS); IPR029000 (G3DSA:2.40.100.GENE3D); IPR002130 (PFAM); PTHR11071:SF116 (PANTHER); IPR024936 (PANTHER); IPR020892 (PROSITE_PATTERNS); IPR002130 (PROSITE_PROFILES); IPR029000 (SUPERFAMILY)                                                                                                                                                                                                                                                                                                                                    |
| 1571 | 290664_length_992_cvg_3.1_tip_1_3   | 47    | peroxidasin extracellular matrix-associated peroxidase | 331 | 6.24E-08  | 62.70%  | 0.102   | IPR019791 (PFAM); IPR019791 (G3DSA:1.10.640.GENE3D); PTHR11475 (PANTHER); IPR019791 (PROSITE_PROFILES); IPR010255 (SUPERFAMILY)                                                                                                                                                                                                                                                                                                                                                                                                                 |
| 1572 | 290744_length_996_cvg_8.3_tip_1_0   | 123   | 5 -nucleotidase                                        | 332 | 5.96E-120 | 70.80%  | 0.11    | IPR008334 (G3DSA:3.90.780.GENE3D); IPR008334 (PFAM); IPR006179 (PANTHER); PTHR11575:SF7 (PANTHER); IPR008334 (SUPERFAMILY)                                                                                                                                                                                                                                                                                                                                                                                                                      |
| 1573 | 290762_length_996_cvg_4.6_tip_1_4   | 66    | zinc finger protein                                    | 332 | 1.94E-24  | 52.20%  | 0.102   | IPR015880 (SMART); IPR013087 (G3DSA:3.30.160.GENE3D); PF13894 (PFAM); IPR007087 (PFAM); IPR013087 (G3DSA:3.30.160.GENE3D); PF13465 (PFAM); IPR013087 (G3DSA:3.30.160.GENE3D); PTHR24409:SF14 (PANTHER); PTHR24409 (PANTHER); IPR007087 (PROSITE_PATTERNS); IPR007087 (PROSITE_PATTERNS); IPR007087 (PROSITE_PROFILES); IPR007087 (PROSITE_PROFILES); IPR007087 (PROSITE_PROFILES); IPR007087 (PROSITE_PROFILES); SSF57667 (SUPERFAMILY); SSF57667 (SUPERFAMILY); SSF57667 (SUPERFAMILY)                                                         |
| 1574 | 290862_length_1000_cvg_3.1_tip_1_4  | 48    | atrial natriuretic peptide-converting enzyme-like      | 333 | 4.19E-46  | 61.70%  | 0.1     | Coil (COILS); IPR002172 (SMART); IPR020067 (SMART); IPR020067 (PFAM); IPR020067 (G3DSA:1.10.2000.GENE3D); IPR002172 (G3DSA:4.10.400.GENE3D); IPR002172 (PFAM); IPR023415 (PROSITE_PATTERNS); IPR020067 (PROSITE_PROFILES); IPR002172 (PROSITE_PROFILES); IPR020067 (SUPERFAMILY); IPR002172 (SUPERFAMILY)                                                                                                                                                                                                                                       |
| 1575 | 290870_length_1001_cvg_81.1_tip_1_2 | 18311 | der p 3 allergen                                       | 333 | 4.30E-60  | 61.00%  | 0.886 Y | IPR001314 (PRINTS); IPR001254 (SMART); G3DSA:2.40.10.10 (GENE3D); G3DSA:2.40.10.10 (GENE3D); IPR001254 (PFAM); PTHR24276 (PANTHER); IPR018114 (PROSITE_PATTERNS); IPR018114 (PROSITE_PATTERNS); SIGNAL_PEPTIDE_C_REGION (PHOBIUS); SIGNAL_PEPTIDE_N_REGION (PHOBIUS); SIGNAL_PEPTIDE (PHOBIUS); NON_CYTOPLASMIC_DOMAIN (PHOBIUS); SIGNAL_PEPTIDE_H_REGION (PHOBIUS); IPR001254 (PROSITE_PROFILES); SignalP-noTM (SIGNALP_EUK); IPR009003 (SUPERFAMILY)                                                                                          |
| 1576 | 290874_length_1001_cvg_52.9_tip_1_3 | 936   | scp-like extracellular domain containing protein 1     | 334 | 5.99E-45  | 52.60%  | 0.854 Y | IPR002413 (PRINTS); IPR001283 (PRINTS); IPR014044 (SMART); IPR014044 (PFAM); IPR014044 (G3DSA:3.40.33.GENE3D); IPR001283 (PANTHER); SIGNAL_PEPTIDE_H_REGION (PHOBIUS); SIGNAL_PEPTIDE (PHOBIUS); NON_CYTOPLASMIC_DOMAIN (PHOBIUS); SIGNAL_PEPTIDE_C_REGION (PHOBIUS); SIGNAL_PEPTIDE_N_REGION (PHOBIUS); SignalP-noTM (SIGNALP_EUK); SignalP-TM (SIGNALP_GRAM_POSITIVE); SignalP-noTM (SIGNALP_GRAM_NEGATIVE); IPR014044 (SUPERFAMILY); TMhelix (TMHMM)                                                                                         |

|      |                                     |       |                                                                       |     |           |        |         |                                                                                                                                                                                                                                                                                                                                                                                                                                                                                                                             |
|------|-------------------------------------|-------|-----------------------------------------------------------------------|-----|-----------|--------|---------|-----------------------------------------------------------------------------------------------------------------------------------------------------------------------------------------------------------------------------------------------------------------------------------------------------------------------------------------------------------------------------------------------------------------------------------------------------------------------------------------------------------------------------|
| 1577 | 290896_length_1002_cvg_9.5_tip_1_4  | 130   | spondin-1 isoform x3                                                  | 334 | 2.10E-110 | 72.80% | 0.132   | IPR002861 (PFAM); IPR009465 (PFAM); PTHR11311 (PANTHER); NON_CYTOPLASMIC_DOMAIN (PHOBIUS); TRANSMEMBRANE (PHOBIUS); CYTOPLASMIC_DOMAIN (PHOBIUS); IPR002861 (PROSITE_PROFILES); IPR009465 (PROSITE_PROFILES); TMhelix (TMHMM)                                                                                                                                                                                                                                                                                               |
| 1579 | 290912_length_1003_cvg_11.8_tip_1_5 | 125   | peptidyl-prolyl cis-trans isomerase a2                                | 334 | 2.24E-35  | 54.30% | 0.116   | IPR002130 (PFAM); IPR029000 (G3DSA:2.40.100.GENE3D); IPR024936 (PANTHER); PTHR11071:SF202 (PANTHER); NON_CYTOPLASMIC_DOMAIN (PHOBIUS); CYTOPLASMIC_DOMAIN (PHOBIUS); TRANSMEMBRANE (PHOBIUS); NON_CYTOPLASMIC_DOMAIN (PHOBIUS); TRANSMEMBRANE (PHOBIUS); IPR002130 (PROSITE_PROFILES); IPR029000 (SUPERFAMILY); TMhelix (TMHMM); TMhelix (TMHMM); TMhelix (TMHMM); TMhelix (TMHMM)                                                                                                                                          |
| 1578 | 290910_length_1003_cvg_6.4_tip_1_3  | 107   | biotinidase isoform x2                                                | 335 | 1.41E-10  | 45.80% | 0.1     | PTHR10609:SF14 (PANTHER); IPR012101 (PANTHER); CYTOPLASMIC_DOMAIN (PHOBIUS); TRANSMEMBRANE (PHOBIUS); NON_CYTOPLASMIC_DOMAIN (PHOBIUS); TMhelix (TMHMM)                                                                                                                                                                                                                                                                                                                                                                     |
| 1580 | 290914_length_1003_cvg_3.7_tip_1_0  | 59    | vascular endothelial growth factor receptor 2                         | 335 | 8.11E-52  | 55.90% | 0.27    | G3DSA:1.10.510.10 (GENE3D); IPR001245 (PFAM); PTHR24416:SF298 (PANTHER); PTHR24416 (PANTHER); IPR000719 (PROSITE_PROFILES); IPR011009 (SUPERFAMILY)                                                                                                                                                                                                                                                                                                                                                                         |
| 1581 | 290962_length_1005_cvg_3.0_tip_1_0  | 45    | ankyrin repeat domain-containing protein 17                           | 335 | 0         | 95.80% | 0.12    | IPR002110 (PRINTS); IPR002110 (SMART); IPR020683 (G3DSA:1.25.40.GENE3D); IPR020683 (G3DSA:1.25.40.GENE3D); IPR020683 (G3DSA:1.25.40.GENE3D); PF13637 (PFAM); IPR020683 (PFAM); IPR002110 (PFAM); PTHR23206 (PANTHER); IPR002110 (PROSITE_PROFILES); IPR002110 (PROSITE_PROFILES); IPR020683 (PROSITE_PROFILES); IPR002110 (PROSITE_PROFILES); IPR002110 (PROSITE_PROFILES); IPR002110 (PROSITE_PROFILES); IPR002110 (PROSITE_PROFILES); IPR002110 (PROSITE_PROFILES); IPR002110 (PROSITE_PROFILES); IPR020683 (SUPERFAMILY) |
| 1582 | 290968_length_1005_cvg_12.9_tip_1_3 | 191   | d-dopachrome decarboxylase-a-like                                     | 335 | 2.36E-24  | 62.60% | 0.112   | IPR001398 (PFAM); G3DSA:3.30.429.10 (GENE3D); PTHR11954:SF22 (PANTHER); IPR001398 (PANTHER); TRANSMEMBRANE (PHOBIUS); TRANSMEMBRANE (PHOBIUS); CYTOPLASMIC_DOMAIN (PHOBIUS); NON_CYTOPLASMIC_DOMAIN (PHOBIUS); NON_CYTOPLASMIC_DOMAIN (PHOBIUS); IPR001398 (PRODOM); IPR014347 (SUPERFAMILY); TMhelix (TMHMM)                                                                                                                                                                                                               |
| 1583 | 290994_length_1006_cvg_19.2_tip_1_4 | 217   | ---NA---                                                              | 335 |           |        | 0.106   | no IPS match                                                                                                                                                                                                                                                                                                                                                                                                                                                                                                                |
| 1584 | 291008_length_1006_cvg_16.6_tip_1_4 | 183   | endoplasmic reticulum resident protein 29                             | 335 | 1.04E-95  | 70.80% | 0.767 Y | Coil (COILS); IPR011679 (PFAM); IPR012336 (G3DSA:3.40.30.GENE3D); IPR011679 (G3DSA:1.20.1150.GENE3D); IPR012883 (PFAM); PTHR12211 (PANTHER); PTHR12211:SF0 (PANTHER); SIGNAL_PEPTIDE_H_REGION (PHOBIUS); SIGNAL_PEPTIDE_N_REGION (PHOBIUS); SIGNAL_PEPTIDE_C_REGION (PHOBIUS); NON_CYTOPLASMIC_DOMAIN (PHOBIUS); SIGNAL_PEPTIDE (PHOBIUS); SignalP-noTM (SIGNALP_EUK); SignalP-TM (SIGNALP_GRAM_POSITIVE); SignalP-noTM (SIGNALP_GRAM_NEGATIVE); IPR012336 (SUPERFAMILY); IPR011679 (SUPERFAMILY)                           |
| 1585 | 291052_length_1008_cvg_59.2_tip_1_5 | 5006  | hemagglutinin amebocyte aggregation factor-like                       | 336 | 2.24E-41  | 61.00% | 0.252   | PF14704 (PFAM); IPR026645 (PANTHER); TRANSMEMBRANE (PHOBIUS); TRANSMEMBRANE (PHOBIUS); CYTOPLASMIC_DOMAIN (PHOBIUS); NON_CYTOPLASMIC_DOMAIN (PHOBIUS); NON_CYTOPLASMIC_DOMAIN (PHOBIUS); TMhelix (TMHMM); TMhelix (TMHMM)                                                                                                                                                                                                                                                                                                   |
| 1586 | 291054_length_1008_cvg_8.9_tip_1_1  | 118   | carbonyl reductase                                                    | 336 | 2.71E-128 | 74.90% | 0.144   | IPR002347 (PRINTS); IPR002198 (PRINTS); IPR016040 (G3DSA:3.40.50.GENE3D); IPR002198 (PFAM); PTHR24322:SF58 (PANTHER); PTHR24322 (PANTHER); SSF51735 (SUPERFAMILY)                                                                                                                                                                                                                                                                                                                                                           |
| 1587 | 291056_length_1008_cvg_2.0_tip_1_3  | 32    | insulin-like receptor                                                 | 336 | 4.88E-105 | 65.20% | 0.116   | IPR006212 (SMART); G3DSA:2.10.220.10 (GENE3D); IPR013783 (G3DSA:2.60.40.GENE3D); IPR000494 (PFAM); IPR006211 (PFAM); IPR000494 (G3DSA:3.80.20.GENE3D); IPR000494 (G3DSA:3.80.20.GENE3D); PTHR24416:SF95 (PANTHER); PTHR24416 (PANTHER); IPR009030 (SUPERFAMILY); SSF52058 (SUPERFAMILY)                                                                                                                                                                                                                                     |
| 1609 | 291966_length_1052_cvg_8.7_tip_1_0  | 139   | aminoacyl trna synthase complex-interacting multifunctional protein 1 | 338 | 4.43E-100 | 68.30% | 0.117   | Coil (COILS); IPR002547 (PFAM); IPR012340 (G3DSA:2.40.50.GENE3D); PTHR11586 (PANTHER); PTHR11586:SF1 (PANTHER); IPR002547 (PROSITE_PROFILES); IPR012340 (SUPERFAMILY)                                                                                                                                                                                                                                                                                                                                                       |
| 1588 | 291226_length_1016_cvg_64.0_tip_1_4 | 11353 | snaclec stejaggregin-a subunit beta-1-like isoform x2                 | 339 | 5.60E-17  | 48.40% | 0.305   | IPR001304 (SMART); IPR016186 (G3DSA:3.10.100.GENE3D); IPR001304 (PFAM); PTHR22802 (PANTHER); SIGNAL_PEPTIDE (PHOBIUS); SIGNAL_PEPTIDE_H_REGION (PHOBIUS); SIGNAL_PEPTIDE_N_REGION (PHOBIUS); CYTOPLASMIC_DOMAIN (PHOBIUS); TRANSMEMBRANE (PHOBIUS); NON_CYTOPLASMIC_DOMAIN (PHOBIUS); SIGNAL_PEPTIDE_C_REGION (PHOBIUS); IPR001304 (PROSITE_PROFILES); IPR016187 (SUPERFAMILY); TMhelix (TMHMM)                                                                                                                             |
| 1589 | 291242_length_1017_cvg_29.2_tip_1_2 | 429   | chorion peroxidase-like                                               | 339 | 5.25E-41  | 68.70% | 0.116   | IPR019791 (G3DSA:1.10.640.GENE3D); IPR019791 (PFAM); PTHR11475 (PANTHER); IPR019791 (PROSITE_PROFILES); IPR010255 (SUPERFAMILY)                                                                                                                                                                                                                                                                                                                                                                                             |



|      |                                     |       |                                                            |     |           |        |         |                                                                                                                                                                                                                                                                                                                                                                                                                                                                                                                                                                                      |
|------|-------------------------------------|-------|------------------------------------------------------------|-----|-----------|--------|---------|--------------------------------------------------------------------------------------------------------------------------------------------------------------------------------------------------------------------------------------------------------------------------------------------------------------------------------------------------------------------------------------------------------------------------------------------------------------------------------------------------------------------------------------------------------------------------------------|
| 1590 | 291274_length_1018_cvg_46.1_tip_1_1 | 1427  | low quality protein: glutathione peroxidase 1-like         | 339 | 5.44E-87  | 79.30% | 0.148   | IPR000889 (PRINTS); IPR012336 (G3DSA:3.40.30.GENE3D); IPR000889 (PFAM); PTHR11592:SF21 (PANTHER); IPR000889 (PANTHER); IPR000889 (PROSITE_PROFILES); IPR012336 (SUPERFAMILY)                                                                                                                                                                                                                                                                                                                                                                                                         |
| 1591 | 291302_length_1020_cvg_3.3_tip_1_0  | 41    | ww domain-containing oxidoreductase                        | 340 | 1.05E-103 | 72.30% | 0.128   | IPR002198 (PFAM); IPR016040 (G3DSA:3.40.50.GENE3D); PTHR24316 (PANTHER); PTHR24316:SF115 (PANTHER); NON_CYTOPLASMIC_DOMAIN (PHOBIUS); TRANSMEMBRANE (PHOBIUS); CYTOPLASMIC_DOMAIN (PHOBIUS); TRANSMEMBRANE (PHOBIUS); CYTOPLASMIC_DOMAIN (PHOBIUS); SSF51735 (SUPERFAMILY); TMhelix (TMHMM)                                                                                                                                                                                                                                                                                          |
| 1592 | 291358_length_1023_cvg_6.9_tip_1_2  | 83    | collagen triple helix repeat family protein                | 341 | 5.96E-13  | 53.88% | 0.095   | TRANSMEMBRANE (PHOBIUS); NON_CYTOPLASMIC_DOMAIN (PHOBIUS); CYTOPLASMIC_DOMAIN (PHOBIUS); TMhelix (TMHMM)                                                                                                                                                                                                                                                                                                                                                                                                                                                                             |
| 1593 | 291358_length_1023_cvg_6.9_tip_1_5  | 83    | hypothetical protein                                       | 341 | 4.56E-16  | 54.50% | 0.352 Y | no IPS match                                                                                                                                                                                                                                                                                                                                                                                                                                                                                                                                                                         |
| 1594 | 291398_length_1024_cvg_64.1_tip_1_5 | 20409 | glyceraldehyde-3-phosphate dehydrogenase                   | 341 | 0         | 90.30% | 0.107   | IPR020831 (PRINTS); IPR020828 (SMART); IPR016040 (G3DSA:3.40.50.GENE3D); IPR020828 (PFAM); IPR020831 (PIRSF); G3DSA:3.30.360.10 (GENE3D); IPR006424 (TIGRFAM); IPR020829 (PFAM); IPR020831 (PANTHER); IPR020830 (PROSITE_PATTERNS); SSF51735 (SUPERFAMILY); SSF55347 (SUPERFAMILY)                                                                                                                                                                                                                                                                                                   |
| 1595 | 291534_length_1030_cvg_2.1_tip_1_0  | 29    | prion-like-(q n-rich) domain-bearing protein 25 isoform x2 | 344 | 1.72E-14  | 42.00% | 0.104   | no IPS match                                                                                                                                                                                                                                                                                                                                                                                                                                                                                                                                                                         |
| 1596 | 291608_length_1033_cvg_3.0_tip_1_1  | 46    | hemocytin                                                  | 344 | 3.15E-38  | 45.40% | 0.114   | G3DSA:2.10.25.10 (GENE3D); IPR014853 (PFAM); IPR001846 (PROSITE_PROFILES); IPR001846 (PROSITE_PROFILES); IPR002919 (SUPERFAMILY)                                                                                                                                                                                                                                                                                                                                                                                                                                                     |
| 1597 | 291614_length_1034_cvg_5.5_tip_1_2  | 74    | von willebrand factor a domain-containing protein 8-like   | 344 | 7.95E-130 | 71.40% | 0.103   | IPR011042 (G3DSA:2.120.10.GENE3D); PTHR21610:SF9 (PANTHER); PTHR21610 (PANTHER)                                                                                                                                                                                                                                                                                                                                                                                                                                                                                                      |
| 1598 | 291628_length_1034_cvg_62.5_tip_1_4 | 1449  | epidermal retinol dehydrogenase 2-like                     | 345 | 3.57E-94  | 72.60% | 0.109   | Coil (COILS); IPR002198 (PRINTS); IPR002347 (PRINTS); IPR016040 (G3DSA:3.40.50.GENE3D); IPR002198 (PFAM); PTHR24316 (PANTHER); PTHR24316:SF289 (PANTHER); CYTOPLASMIC_DOMAIN (PHOBIUS); NON_CYTOPLASMIC_DOMAIN (PHOBIUS); TRANSMEMBRANE (PHOBIUS); SSF51735 (SUPERFAMILY); TMhelix (TMHMM)                                                                                                                                                                                                                                                                                           |
| 1599 | 291636_length_1034_cvg_9.1_tip_1_0  | 94    | tissue plasminogen activator                               | 345 | 5.64E-21  | 70.60% | 0.099   | G3DSA:2.40.10.10 (GENE3D); IPR001254 (PFAM); PTHR24256 (PANTHER); IPR018114 (PROSITE_PATTERNS); TRANSMEMBRANE (PHOBIUS); NON_CYTOPLASMIC_DOMAIN (PHOBIUS); CYTOPLASMIC_DOMAIN (PHOBIUS); IPR001254 (PROSITE_PROFILES); IPR009003 (SUPERFAMILY); TMhelix (TMHMM); TMhelix (TMHMM)                                                                                                                                                                                                                                                                                                     |
| 1600 | 291638_length_1035_cvg_11.2_tip_1_1 | 140   | i-type lysozyme-like protein 2                             | 345 | 1.71E-40  | 66.40% | 0.102   | IPR008597 (PFAM); PTHR11195:SF13 (PANTHER); IPR008597 (PANTHER); IPR018247 (PROSITE_PATTERNS)                                                                                                                                                                                                                                                                                                                                                                                                                                                                                        |
| 1601 | 291640_length_1035_cvg_14.2_tip_1_5 | 219   | trypsin 3                                                  | 345 | 1.54E-57  | 60.80% | 0.806 Y | IPR001314 (PRINTS); IPR001254 (SMART); IPR001254 (PFAM); G3DSA:2.40.10.10 (GENE3D); G3DSA:2.40.10.10 (GENE3D); G3DSA:2.40.10.10 (GENE3D); PTHR24265 (PANTHER); IPR018114 (PROSITE_PATTERNS); CYTOPLASMIC_DOMAIN (PHOBIUS); SIGNAL_PEPTIDE_C_REGION (PHOBIUS); NON_CYTOPLASMIC_DOMAIN (PHOBIUS); TRANSMEMBRANE (PHOBIUS); SIGNAL_PEPTIDE_H_REGION (PHOBIUS); SIGNAL_PEPTIDE_N_REGION (PHOBIUS); SIGNAL_PEPTIDE (PHOBIUS); IPR001254 (PROSITE_PROFILES); SignalP-TM (SIGNALP_GRAM_POSITIVE); SignalP-noTM (SIGNALP_EUK); SignalP-noTM (SIGNALP_GRAM_NEGATIVE); IPR009003 (SUPERFAMILY) |
| 1602 | 291790_length_1042_cvg_16.0_tip_1_1 | 203   | brain peptide idl-like protein                             | 347 | 5.10E-109 | 87.90% | 0.107   | IPR002172 (SMART); IPR002172 (PFAM); IPR002172 (G3DSA:4.10.400.GENE3D); PTHR20967 (PANTHER); IPR023415 (PROSITE_PATTERNS); CYTOPLASMIC_DOMAIN (PHOBIUS); TRANSMEMBRANE (PHOBIUS); NON_CYTOPLASMIC_DOMAIN (PHOBIUS); NON_CYTOPLASMIC_DOMAIN (PHOBIUS); TRANSMEMBRANE (PHOBIUS); IPR002172 (PROSITE_PROFILES); IPR002172 (SUPERFAMILY); TMhelix (TMHMM); TMhelix (TMHMM)                                                                                                                                                                                                               |
| 1603 | 291812_length_1043_cvg_47.6_tip_1_2 | 637   | 27 kda hemolymph                                           | 347 | 1.58E-30  | 49.50% | 0.191   | IPR009832 (PFAM); PTHR20997 (PANTHER); TRANSMEMBRANE (PHOBIUS); CYTOPLASMIC_DOMAIN (PHOBIUS); NON_CYTOPLASMIC_DOMAIN (PHOBIUS)                                                                                                                                                                                                                                                                                                                                                                                                                                                       |
| 1604 | 291856_length_1045_cvg_51.2_tip_1_1 | 851   | zinc metalloproteinase nas-4-like                          | 348 | 5.31E-43  | 55.30% | 0.907 Y | IPR001506 (PRINTS); IPR006026 (SMART); IPR001506 (PFAM); IPR024079 (G3DSA:3.40.390.GENE3D); PTHR10127 (PANTHER); SIGNAL_PEPTIDE_H_REGION (PHOBIUS); SIGNAL_PEPTIDE (PHOBIUS); SIGNAL_PEPTIDE_C_REGION (PHOBIUS); SIGNAL_PEPTIDE_N_REGION (PHOBIUS); NON_CYTOPLASMIC_DOMAIN (PHOBIUS); SignalP-noTM (SIGNALP_EUK); SignalP-TM (SIGNALP_GRAM_NEGATIVE); SSF55486 (SUPERFAMILY)                                                                                                                                                                                                         |



|      |                                     |     |                                                                 |     |           |        |         |                                                                                                                                                                                                                                                                                                                                                                                                                                                 |
|------|-------------------------------------|-----|-----------------------------------------------------------------|-----|-----------|--------|---------|-------------------------------------------------------------------------------------------------------------------------------------------------------------------------------------------------------------------------------------------------------------------------------------------------------------------------------------------------------------------------------------------------------------------------------------------------|
| 1618 | 292074_length_1058_cvg_4.0_tip_1_4  | 54  | serine-threonine kinase receptor-associated protein             | 348 | 0         | 85.90% | 0.13    | IPR020472 (PRINTS); IPR001680 (SMART); IPR001680 (PFAM); IPR015943 (G3DSA:2.130.10.GENE3D); PTHR19877 (PANTHER); IPR019775 (PROSITE_PATTERNS); IPR001680 (PROSITE_PROFILES); IPR017986 (PROSITE_PROFILES); IPR001680 (PROSITE_PROFILES); IPR001680 (PROSITE_PROFILES); IPR001680 (PROSITE_PROFILES); IPR017986 (SUPERFAMILY)                                                                                                                    |
| 1606 | 291906_length_1048_cvg_39.8_tip_1_1 | 595 | adiponectin receptor protein                                    | 349 | 3.06E-111 | 84.20% | 0.282   | IPR004254 (PFAM); IPR004254 (PANTHER); PTHR20855:SF15 (PANTHER); NON_CYTOPLASMIC_DOMAIN (PHOBIUS); TRANSMEMBRANE (PHOBIUS); TRANSMEMBRANE (PHOBIUS); CYTOPLASMIC_DOMAIN (PHOBIUS); CYTOPLASMIC_DOMAIN (PHOBIUS); NON_CYTOPLASMIC_DOMAIN (PHOBIUS); NON_CYTOPLASMIC_DOMAIN (PHOBIUS); TRANSMEMBRANE (PHOBIUS); CYTOPLASMIC_DOMAIN (PHOBIUS); TRANSMEMBRANE (PHOBIUS); TRANSMEMBRANE (PHOBIUS); TMhelix (TMHMM); TMhelix (TMHMM); TMhelix (TMHMM) |
| 1608 | 291914_length_1049_cvg_8.0_tip_1_5  | 88  | macrophage mannose receptor 1-like                              | 349 | 5.03E-46  | 49.50% | 0.103   | IPR001304 (SMART); IPR016186 (G3DSA:3.10.100.GENE3D); IPR016186 (G3DSA:3.10.100.GENE3D); IPR001304 (PFAM); PTHR22803:SF16 (PANTHER); PTHR22803 (PANTHER); IPR018378 (PROSITE_PATTERNS); IPR001304 (PROSITE_PROFILES); IPR001304 (PROSITE_PROFILES); IPR016187 (SUPERFAMILY); IPR016187 (SUPERFAMILY)                                                                                                                                            |
| 1605 | 291890_length_1048_cvg_6.5_tip_1_0  | 75  | dehydrogenase reductase sdr family member 11-like               | 350 | 1.62E-97  | 74.70% | 0.165   | IPR002198 (PRINTS); IPR002347 (PRINTS); IPR002198 (PFAM); IPR005639 (G3DSA:1.20.190.GENE3D); IPR016040 (G3DSA:3.40.50.GENE3D); PTHR24322:SF310 (PANTHER); PTHR24322 (PANTHER); SSF51735 (SUPERFAMILY)                                                                                                                                                                                                                                           |
| 1607 | 291912_length_1049_cvg_8.2_tip_1_1  | 109 | c-type mannose receptor 2                                       | 350 | 4.69E-16  | 47.30% | 0.178   | IPR001304 (SMART); IPR001304 (PFAM); IPR016186 (G3DSA:3.10.100.GENE3D); PTHR22802:SF149 (PANTHER); PTHR22802 (PANTHER); IPR001304 (PROSITE_PROFILES); IPR016187 (SUPERFAMILY); TMhelix (TMHMM)                                                                                                                                                                                                                                                  |
| 1610 | 291988_length_1053_cvg_4.9_tip_1_0  | 64  | low quality protein: hemocytin                                  | 351 | 4.90E-34  | 48.40% | 0.107   | IPR025155 (PFAM); SSF57603 (SUPERFAMILY)                                                                                                                                                                                                                                                                                                                                                                                                        |
| 1611 | 291996_length_1053_cvg_23.6_tip_1_4 | 214 | inactive hydroxysteroid dehydrogenase-like protein 1 isoform x1 | 351 | 2.85E-97  | 71.90% | 0.104   | Coil (COILS); IPR002347 (PRINTS); IPR002198 (PRINTS); IPR002198 (PFAM); IPR016040 (G3DSA:3.40.50.GENE3D); PTHR24316:SF317 (PANTHER); PTHR24316 (PANTHER); IPR020904 (PROSITE_PATTERNS); SSF51735 (SUPERFAMILY)                                                                                                                                                                                                                                  |
| 1612 | 292014_length_1054_cvg_8.0_tip_1_0  | 102 | serine threonine-protein kinase pim-3                           | 352 | 8.31E-140 | 77.70% | 0.174   | IPR002290 (SMART); IPR000719 (PFAM); G3DSA:1.10.510.10 (GENE3D); G3DSA:3.30.200.20 (GENE3D); IPR017348 (PIRSF); PTHR22984 (PANTHER); PTHR22984:SF1 (PANTHER); IPR008271 (PROSITE_PATTERNS); IPR017441 (PROSITE_PATTERNS); IPR000719 (PROSITE_PROFILES); IPR011009 (SUPERFAMILY)                                                                                                                                                                 |
| 1613 | 292018_length_1054_cvg_3.7_tip_1_0  | 63  | probable serine carboxypeptidase cpvl isoform x1                | 352 | 8.48E-93  | 65.30% | 0.334   | IPR001563 (PRINTS); IPR001563 (PFAM); IPR029058 (G3DSA:3.40.50.GENE3D); IPR001563 (PANTHER); PTHR11802:SF30 (PANTHER); IPR029058 (SUPERFAMILY)                                                                                                                                                                                                                                                                                                  |
| 1614 | 292032_length_1056_cvg_4.8_tip_1_4  | 62  | laminin a                                                       | 352 | 1.93E-53  | 65.80% | 0.097   | IPR001791 (SMART); IPR001791 (PFAM); IPR013320 (G3DSA:2.60.120.GENE3D); PTHR10574:SF39 (PANTHER); PTHR10574 (PANTHER); IPR001791 (PROSITE_PROFILES); IPR013320 (SUPERFAMILY)                                                                                                                                                                                                                                                                    |
| 1615 | 292034_length_1056_cvg_3.1_tip_1_2  | 49  | serine protease p153                                            | 352 | 3.67E-08  | 49.80% | 0.102   | IPR002172 (PRINTS); IPR003609 (SMART); IPR002172 (SMART); IPR002172 (G3DSA:4.10.400.GENE3D); G3DSA:3.50.4.10 (GENE3D); IPR003014 (PFAM); IPR002172 (PFAM); IPR023415 (PROSITE_PATTERNS); IPR003609 (PROSITE_PROFILES); IPR002172 (PROSITE_PROFILES); IPR003609 (PROSITE_PROFILES); SSF57414 (SUPERFAMILY); SSF57414 (SUPERFAMILY); IPR002172 (SUPERFAMILY)                                                                                      |
| 1616 | 292038_length_1056_cvg_22.4_tip_1_2 | 338 | ovalbumin-related protein x-like isoform x1                     | 352 | 1.23E-72  | 61.10% | 0.198   | IPR023796 (SMART); G3DSA:3.30.497.10 (GENE3D); IPR023796 (PFAM); G3DSA:2.30.39.10 (GENE3D); PTHR11461:SF124 (PANTHER); IPR000215 (PANTHER); TRANSMEMBRANE (PHOBIUS); NON_CYTOPLASMIC_DOMAIN (PHOBIUS); NON_CYTOPLASMIC_DOMAIN (PHOBIUS); CYTOPLASMIC_DOMAIN (PHOBIUS); CYTOPLASMIC_DOMAIN (PHOBIUS); TRANSMEMBRANE (PHOBIUS); TRANSMEMBRANE (PHOBIUS); IPR023796 (SUPERFAMILY)                                                                  |
| 1617 | 292048_length_1056_cvg_7.8_tip_1_1  | 104 | pc3-like endoprotease variant b-like                            | 352 | 1.72E-30  | 57.20% | 0.187   | IPR015500 (PRINTS); IPR000209 (G3DSA:3.40.50.GENE3D); G3DSA:3.30.70.850 (GENE3D); IPR000209 (PFAM); PTHR10795:SF310 (PANTHER); IPR015500 (PANTHER); IPR023827 (PROSITE_PATTERNS); CYTOPLASMIC_DOMAIN (PHOBIUS); TRANSMEMBRANE (PHOBIUS); NON_CYTOPLASMIC_DOMAIN (PHOBIUS); IPR009020 (SUPERFAMILY); IPR000209 (SUPERFAMILY)                                                                                                                     |
| 1619 | 292084_length_1059_cvg_5.2_tip_1_4  | 73  | 5'-nucleotidase                                                 | 353 | 1.21E-148 | 80.40% | 0.363 Y | IPR004843 (PFAM); IPR029052 (G3DSA:3.60.21.GENE3D); PTHR11575:SF7 (PANTHER); IPR006179 (PANTHER); IPR029052 (SUPERFAMILY)                                                                                                                                                                                                                                                                                                                       |



|      |                                     |        |                                                           |     |           |        |         |                                                                                                                                                                                                                                                                                                                                                                                                                                                                                                  |
|------|-------------------------------------|--------|-----------------------------------------------------------|-----|-----------|--------|---------|--------------------------------------------------------------------------------------------------------------------------------------------------------------------------------------------------------------------------------------------------------------------------------------------------------------------------------------------------------------------------------------------------------------------------------------------------------------------------------------------------|
| 1631 | 292500_length_1078_cvg_35.9_tip_1_0 | 495    | steroid dehydrogenase                                     | 360 | 1.03E-116 | 68.80% | 0.247   | Coil (COILS); IPR002347 (PRINTS); IPR002198 (PRINTS); IPR002198 (PFAM); IPR016040 (G3DSA:3.40.50.GENE3D); IPR002198 (PIRSF); PTHR24316:SF68 (PANTHER); PTHR24316 (PANTHER); NON_CYTOPLASMIC_DOMAIN (PHOBIUS); CYTOPLASMIC_DOMAIN (PHOBIUS); TRANSMEMBRANE (PHOBIUS); CYTOPLASMIC_DOMAIN (PHOBIUS); NON_CYTOPLASMIC_DOMAIN (PHOBIUS); TRANSMEMBRANE (PHOBIUS); SSF51735 (SUPERFAMILY); TMhelix (TMHMM); TMhelix (TMHMM)                                                                           |
| 1632 | 292524_length_1080_cvg_54.0_tip_1_0 | 110785 | hemocyanin subunit type 1 precursor                       | 360 | 0         | 72.30% | 0.202   | IPR013788 (PRINTS); IPR000896 (PFAM); IPR008922 (G3DSA:1.10.1280.GENE3D); IPR005204 (PFAM); IPR005204 (G3DSA:1.20.1370.GENE3D); IPR013788 (PANTHER); PTHR11511:SF5 (PANTHER); IPR013788 (PROSITE_PATTERNS); NON_CYTOPLASMIC_DOMAIN (PHOBIUS); TRANSMEMBRANE (PHOBIUS); CYTOPLASMIC_DOMAIN (PHOBIUS); IPR005204 (SUPERFAMILY); IPR008922 (SUPERFAMILY)                                                                                                                                            |
| 1633 | 292538_length_1081_cvg_18.5_tip_1_1 | 231    | serine protease snake                                     | 360 | 1.85E-69  | 61.20% | 0.141   | IPR001314 (PRINTS); IPR001254 (SMART); G3DSA:2.40.10.10 (GENE3D); IPR001254 (PFAM); G3DSA:2.40.10.10 (GENE3D); G3DSA:2.40.10.10 (GENE3D); PTHR24260:SF46 (PANTHER); PTHR24260 (PANTHER); IPR018114 (PROSITE_PATTERNS); IPR018114 (PROSITE_PATTERNS); IPR001254 (PROSITE_PROFILES); IPR009003 (SUPERFAMILY)                                                                                                                                                                                       |
| 1635 | 292548_length_1081_cvg_16.6_tip_1_5 | 215    | spondin-1                                                 | 360 | 2.22E-82  | 60.30% | 0.141   | IPR002223 (PRINTS); IPR002223 (SMART); IPR000884 (SMART); IPR002223 (PFAM); G3DSA:2.20.100.10 (GENE3D); IPR000884 (PFAM); G3DSA:2.20.100.10 (GENE3D); IPR002223 (G3DSA:4.10.410.GENE3D); PTHR11311:SF11 (PANTHER); PTHR11311 (PANTHER); IPR020901 (PROSITE_PATTERNS); IPR002223 (PROSITE_PROFILES); IPR000884 (PROSITE_PROFILES); IPR000884 (PROSITE_PROFILES); IPR000884 (PROSITE_PROFILES); IPR000884 (SUPERFAMILY); IPR000884 (SUPERFAMILY); IPR002223 (SUPERFAMILY); IPR000884 (SUPERFAMILY) |
| 1634 | 292546_length_1081_cvg_16.3_tip_1_0 | 218    | superoxide dismutase                                      | 361 | 1.04E-63  | 68.70% | 0.28    | IPR001424 (PRINTS); IPR001424 (PFAM); IPR001424 (G3DSA:2.60.40.GENE3D); PTHR10003 (PANTHER); IPR018152 (PROSITE_PATTERNS); IPR018152 (PROSITE_PATTERNS); SIGNAL_PEPTIDE_H_REGION (PHOBIUS); SIGNAL_PEPTIDE_C_REGION (PHOBIUS); NON_CYTOPLASMIC_DOMAIN (PHOBIUS); SIGNAL_PEPTIDE (PHOBIUS); SIGNAL_PEPTIDE_N_REGION (PHOBIUS); SignalP-TM (SIGNALP_GRAM_POSITIVE); IPR001424 (SUPERFAMILY); IPR001424 (SUPERFAMILY); TMhelix (TMHMM)                                                              |
| 1636 | 292716_length_1090_cvg_51.0_tip_1_1 | 732    | eukaryotic translation initiation factor 3 subunit i-like | 363 | 0         | 84.20% | 0.121   | IPR001680 (SMART); IPR001680 (PFAM); IPR015943 (G3DSA:2.130.10.GENE3D); PTHR19877 (PANTHER); IPR019775 (PROSITE_PATTERNS); IPR017986 (PROSITE_PROFILES); IPR001680 (PROSITE_PROFILES); IPR027525 (HAMAP); IPR001680 (PROSITE_PROFILES); IPR001680 (PROSITE_PROFILES); IPR001680 (PROSITE_PROFILES); IPR017986 (PROSITE_PROFILES); IPR017986 (SUPERFAMILY)                                                                                                                                        |
| 1637 | 292772_length_1093_cvg_12.8_tip_1_5 | 167    | peroxisomal trans-2-enoyl- reductase-like                 | 364 | 1.17E-126 | 74.10% | 0.156   | IPR002347 (PRINTS); PF13561 (PFAM); IPR016040 (G3DSA:3.40.50.GENE3D); PTHR24317 (PANTHER); SSF51735 (SUPERFAMILY)                                                                                                                                                                                                                                                                                                                                                                                |
| 1638 | 292808_length_1095_cvg_10.2_tip_1_5 | 182    | acrosin- partial                                          | 365 | 5.64E-55  | 53.90% | 0.395 Y | IPR001314 (PRINTS); IPR001254 (SMART); G3DSA:2.40.10.10 (GENE3D); IPR001254 (PFAM); G3DSA:2.40.10.10 (GENE3D); PTHR24265 (PANTHER); IPR018114 (PROSITE_PATTERNS); IPR018114 (PROSITE_PATTERNS); NON_CYTOPLASMIC_DOMAIN (PHOBIUS); SIGNAL_PEPTIDE_C_REGION (PHOBIUS); SIGNAL_PEPTIDE_H_REGION (PHOBIUS); SIGNAL_PEPTIDE_N_REGION (PHOBIUS); SIGNAL_PEPTIDE (PHOBIUS); IPR001254 (PROSITE_PROFILES); IPR009003 (SUPERFAMILY)                                                                       |
| 1639 | 292814_length_1095_cvg_9.2_tip_1_4  | 132    | serine threonine-protein phosphatase 6 catalytic subunit  | 365 | 0         | 93.80% | 0.102   | IPR006186 (PRINTS); IPR006186 (SMART); IPR004843 (PFAM); IPR029052 (G3DSA:3.60.21.GENE3D); PTHR11668:SF24 (PANTHER); PTHR11668 (PANTHER); IPR006186 (PROSITE_PATTERNS); IPR029052 (SUPERFAMILY)                                                                                                                                                                                                                                                                                                  |
| 1640 | 292830_length_1095_cvg_75.6_tip_1_3 | 2404   | glycosyl-phosphatidylinositol-linked carbonic anhydrase   | 365 | 2.87E-85  | 63.40% | 0.127   | IPR001148 (SMART); IPR001148 (G3DSA:3.10.200.GENE3D); IPR001148 (PFAM); IPR023561 (PANTHER); IPR018338 (PROSITE_PATTERNS); IPR001148 (PROSITE_PROFILES); IPR001148 (SUPERFAMILY)                                                                                                                                                                                                                                                                                                                 |
| 1641 | 292832_length_1095_cvg_4.0_tip_1_2  | 51     | sco- partial                                              | 365 | 2.71E-41  | 54.00% | 0.107   | IPR002919 (PFAM); IPR025155 (PFAM); G3DSA:2.10.25.10 (GENE3D)                                                                                                                                                                                                                                                                                                                                                                                                                                    |
| 1642 | 292836_length_1096_cvg_62.7_tip_1_2 | 1505   | cytosolic non-specific dipeptidase                        | 365 | 5.74E-140 | 82.00% | 0.291   | IPR011650 (PFAM); IPR011650 (G3DSA:3.30.70.GENE3D); G3DSA:3.40.630.10 (GENE3D); IPR002933 (PFAM); PTHR11014 (PANTHER); PTHR11014:SF51 (PANTHER); TRANSMEMBRANE (PHOBIUS); CYTOPLASMIC_DOMAIN (PHOBIUS); NON_CYTOPLASMIC_DOMAIN (PHOBIUS); SSF53187 (SUPERFAMILY); TMhelix (TMHMM)                                                                                                                                                                                                                |

|      |                                     |      |                                                         |     |           |        |         |                                                                                                                                                                                                                                                                                                                                                                                                                                                                                                                                             |
|------|-------------------------------------|------|---------------------------------------------------------|-----|-----------|--------|---------|---------------------------------------------------------------------------------------------------------------------------------------------------------------------------------------------------------------------------------------------------------------------------------------------------------------------------------------------------------------------------------------------------------------------------------------------------------------------------------------------------------------------------------------------|
| 1643 | 292872_length_1097_cvg_3.0_tip_1_0  | 49   | u4 u6 small nuclear ribonucleoprotein prp31             | 366 | 0         | 89.50% | 0.099   | IPR012976 (SMART); IPR002687 (PFAM); IPR019175 (PFAM); IPR012976 (PFAM); IPR027105 (PANTHER); IPR002687 (PROSITE_PROFILES); SSF89124 (SUPERFAMILY)                                                                                                                                                                                                                                                                                                                                                                                          |
| 1644 | 292882_length_1098_cvg_7.6_tip_1_3  | 99   | beta-n-acetylglucosaminidase-like partial               | 366 | 1.28E-95  | 60.60% | 0.827 Y | IPR025705 (PRINTS); IPR029019 (PFAM); IPR015883 (PFAM); IPR013781 (G3DSA:3.20.20.GENE3D); IPR029018 (G3DSA:3.30.379.GENE3D); PTHR22600 (PANTHER); PTHR22600:SF4 (PANTHER); SIGNAL_PEPTIDE_N_REGION (PHOBIUS); SIGNAL_PEPTIDE_C_REGION (PHOBIUS); SIGNAL_PEPTIDE_H_REGION (PHOBIUS); SIGNAL_PEPTIDE (PHOBIUS); NON_CYTOPLASMIC_DOMAIN (PHOBIUS); SignalP-TM (SIGNALP_GRAM_POSITIVE); SignalP-noTM (SIGNALP_EUK); IPR029018 (SUPERFAMILY); IPR017853 (SUPERFAMILY); TMhelix (TMHMM)                                                           |
| 1646 | 292922_length_1100_cvg_66.2_tip_1_5 | 3789 | nuclease-sensitive element-binding protein 1 isoform x4 | 366 | 1.30E-59  | 75.70% | 0.112   | IPR002059 (PRINTS); IPR011129 (SMART); IPR012340 (G3DSA:2.40.50.GENE3D); IPR002059 (PFAM); PTHR11544 (PANTHER); IPR019844 (PROSITE_PATTERNS); IPR012340 (SUPERFAMILY)                                                                                                                                                                                                                                                                                                                                                                       |
| 1645 | 292902_length_1099_cvg_14.8_tip_1_3 | 184  | wd g-beta repeat protein                                | 367 | 7.35E-111 | 97.80% | 0.133   | IPR020472 (PRINTS); IPR001680 (SMART); IPR001680 (PFAM); IPR015943 (G3DSA:2.130.10.GENE3D); IPR016346 (PANTHER); IPR019775 (PROSITE_PATTERNS); IPR019775 (PROSITE_PATTERNS); NON_CYTOPLASMIC_DOMAIN (PHOBIUS); TRANSMEMBRANE (PHOBIUS); NON_CYTOPLASMIC_DOMAIN (PHOBIUS); CYTOPLASMIC_DOMAIN (PHOBIUS); TRANSMEMBRANE (PHOBIUS); TRANSMEMBRANE (PHOBIUS); IPR001680 (PROSITE_PROFILES); IPR017986 (PROSITE_PROFILES); IPR001680 (PROSITE_PROFILES); IPR001680 (PROSITE_PROFILES); IPR017986 (SUPERFAMILY); TMhelix (TMHMM); TMhelix (TMHMM) |
| 1647 | 292936_length_1100_cvg_4.0_tip_1_0  | 57   | ---NA---                                                | 367 |           |        | 0.097   | Coil (COILS); Coil (COILS); Coil (COILS); Coil (COILS); Coil (COILS); Coil (COILS); Coil (COILS)                                                                                                                                                                                                                                                                                                                                                                                                                                            |
| 1648 | 292938_length_1100_cvg_27.0_tip_1_4 | 342  | 3-hydroxyisobutyrate dehydrogenase                      | 367 | 1.23E-64  | 54.90% | 0.126   | IPR029154 (PFAM); IPR016040 (G3DSA:3.40.50.GENE3D); IPR013328 (G3DSA:1.10.1040.GENE3D); IPR006115 (PFAM); PTHR22981 (PANTHER); PTHR22981:SF7 (PANTHER); IPR029752 (PROSITE_PATTERNS); SSF51735 (SUPERFAMILY); IPR008927 (SUPERFAMILY)                                                                                                                                                                                                                                                                                                       |
| 1649 | 292942_length_1101_cvg_31.8_tip_1_0 | 462  | phospholipase a2-like                                   | 367 | 2.63E-39  | 61.90% | 0.149   | IPR016090 (G3DSA:1.20.90.GENE3D); IPR001211 (PFAM); PTHR12253 (PANTHER); IPR013090 (PROSITE_PATTERNS); IPR016090 (SUPERFAMILY)                                                                                                                                                                                                                                                                                                                                                                                                              |
| 1650 | 292946_length_1101_cvg_3.0_tip_1_2  | 44   | vitellogenin fused with superoxide dismutase            | 367 | 2.31E-40  | 47.40% | 0.153   | IPR011030 (G3DSA:1.25.10.GENE3D); IPR001747 (PFAM); PTHR23345:SF1 (PANTHER); PTHR23345 (PANTHER); IPR001747 (PROSITE_PROFILES); IPR011030 (SUPERFAMILY)                                                                                                                                                                                                                                                                                                                                                                                     |
| 1651 | 292976_length_1102_cvg_41.7_tip_1_3 | 683  | serine protease1 2                                      | 368 | 1.62E-55  | 56.90% | 0.783 Y | IPR001314 (PRINTS); IPR001254 (SMART); IPR001254 (PFAM); G3DSA:2.40.10.10 (GENE3D); G3DSA:2.40.10.10 (GENE3D); PTHR24260 (PANTHER); IPR018114 (PROSITE_PATTERNS); IPR018114 (PROSITE_PATTERNS); IPR001254 (PROSITE_PROFILES); SignalP-noTM (SIGNALP_EUK); IPR009003 (SUPERFAMILY)                                                                                                                                                                                                                                                           |
| 1652 | 293034_length_1105_cvg_3.0_tip_1_2  | 46   | isoform b                                               | 368 | 1.15E-95  | 63.40% | 0.103   | IPR015812 (PRINTS); G3DSA:2.10.25.10 (GENE3D); IPR014836 (G3DSA:1.20.5.GENE3D); G3DSA:2.10.25.10 (GENE3D); IPR012896 (PFAM); IPR014836 (PFAM); G3DSA:1.20.5.100 (GENE3D); IPR015812 (PANTHER); PTHR10082:SF16 (PANTHER); IPR015812 (PROSITE_PATTERNS); IPR015812 (PROSITE_PATTERNS); IPR015812 (PROSITE_PATTERNS); NON_CYTOPLASMIC_DOMAIN (PHOBIUS); TRANSMEMBRANE (PHOBIUS); CYTOPLASMIC_DOMAIN (PHOBIUS); SSF57196 (SUPERFAMILY); IPR012896 (SUPERFAMILY); TMhelix (TMHMM)                                                                |
| 1653 | 293056_length_1105_cvg_8.2_tip_1_5  | 111  | annexin b9-like isoform x3                              | 368 | 5.56E-128 | 73.40% | 0.107   | IPR002391 (PRINTS); IPR001464 (PRINTS); IPR018502 (SMART); IPR018502 (PFAM); IPR018502 (G3DSA:1.10.220.GENE3D); IPR018502 (G3DSA:1.10.220.GENE3D); IPR018502 (G3DSA:1.10.220.GENE3D); IPR018502 (G3DSA:1.10.220.GENE3D); PTHR10502 (PANTHER); IPR018252 (PROSITE_PATTERNS); IPR018252 (PROSITE_PATTERNS); SSF47874 (SUPERFAMILY)                                                                                                                                                                                                            |
| 1654 | 293070_length_1106_cvg_6.5_tip_1_5  | 63   | cytoglobin-2-like isoform 1                             | 368 | 1.81E-45  | 61.90% | 0.137   | IPR002336 (PRINTS); IPR000971 (PFAM); IPR012292 (G3DSA:1.10.490.GENE3D); PTHR11442 (PANTHER); PTHR11442:SF36 (PANTHER); CYTOPLASMIC_DOMAIN (PHOBIUS); TRANSMEMBRANE (PHOBIUS); TRANSMEMBRANE (PHOBIUS); NON_CYTOPLASMIC_DOMAIN (PHOBIUS); CYTOPLASMIC_DOMAIN (PHOBIUS); TRANSMEMBRANE (PHOBIUS); NON_CYTOPLASMIC_DOMAIN (PHOBIUS); IPR000971 (PROSITE_PROFILES); IPR009050 (SUPERFAMILY); TMhelix (TMHMM); TMhelix (TMHMM); TMhelix (TMHMM)                                                                                                 |

|      |                                     |      |                                                  |     |           |        |         |                                                                                                                                                                                                                                                                                                                                                                                                                                                                                                                                                                          |
|------|-------------------------------------|------|--------------------------------------------------|-----|-----------|--------|---------|--------------------------------------------------------------------------------------------------------------------------------------------------------------------------------------------------------------------------------------------------------------------------------------------------------------------------------------------------------------------------------------------------------------------------------------------------------------------------------------------------------------------------------------------------------------------------|
| 1655 | 293090_length_1107_cvg_11.0_tip_1_5 | 140  | acetylcholine receptor subunit alpha-type acr-16 | 369 | 1.30E-100 | 57.90% | 0.133   | IPR006201 (PRINTS); IPR006029 (PFAM); IPR006202 (G3DSA:2.70.170.GENE3D); IPR027361 (G3DSA:1.20.120.GENE3D); IPR006202 (PFAM); IPR006201 (PANTHER); PTHR18945:SF490 (PANTHER); TRANSMEMBRANE (PHOBIUS); NON_CYTOPLASMIC_DOMAIN (PHOBIUS); TRANSMEMBRANE (PHOBIUS); CYTOPLASMIC_DOMAIN (PHOBIUS); CYTOPLASMIC_DOMAIN (PHOBIUS); TRANSMEMBRANE (PHOBIUS); NON_CYTOPLASMIC_DOMAIN (PHOBIUS); TRANSMEMBRANE (PHOBIUS); CYTOPLASMIC_DOMAIN (PHOBIUS); IPR006029 (SUPERFAMILY); IPR006202 (SUPERFAMILY); TMhelix (TMHMM); TMhelix (TMHMM); TMhelix (TMHMM)                      |
| 1656 | 293134_length_1110_cvg_9.9_tip_1_5  | 195  | pacifastin light chain                           | 370 | 5.44E-42  | 41.70% | 0.401 Y | IPR006552 (SMART); IPR008037 (PFAM); IPR020862 (PROSITE_PROFILES); IPR001190 (PROSITE_PROFILES); IPR020862 (PROSITE_PROFILES); IPR020862 (PROSITE_PROFILES); IPR020862 (PROSITE_PROFILES); IPR020862 (PROSITE_PROFILES); IPR020862 (PROSITE_PROFILES); IPR008037 (SUPERFAMILY); IPR008037 (SUPERFAMILY); IPR008037 (SUPERFAMILY); IPR008037 (SUPERFAMILY); IPR008037 (SUPERFAMILY); IPR008037 (SUPERFAMILY); IPR008037 (SUPERFAMILY)                                                                                                                                     |
| 1657 | 293138_length_1110_cvg_3.0_tip_1_0  | 47   | aael008062- partial                              | 370 | 7.58E-156 | 76.10% | 0.114   | IPR003367 (PFAM); IPR028974 (G3DSA:4.10.1080.GENE3D); IPR013320 (G3DSA:2.60.120.GENE3D); IPR008859 (PFAM); PTHR10199 (PANTHER); PTHR10199:SF76 (PANTHER); IPR013032 (PROSITE_PATTERNS); IPR000742 (PROSITE_PROFILES); IPR017897 (PROSITE_PROFILES); IPR008859 (PROSITE_PROFILES); IPR028974 (SUPERFAMILY); IPR013320 (SUPERFAMILY); IPR028974 (SUPERFAMILY); IPR028974 (SUPERFAMILY) |
| 1658 | 293146_length_1110_cvg_3.0_tip_1_4  | 59   | perlucin-like protein                            | 370 | 4.37E-19  | 53.20% | 0.313   | IPR001304 (SMART); IPR001304 (PFAM); IPR016186 (G3DSA:3.10.100.GENE3D); PTHR22802 (PANTHER); IPR018378 (PROSITE_PATTERNS); CYTOPLASMIC_DOMAIN (PHOBIUS); CYTOPLASMIC_DOMAIN (PHOBIUS); TRANSMEMBRANE (PHOBIUS); NON_CYTOPLASMIC_DOMAIN (PHOBIUS); TRANSMEMBRANE (PHOBIUS); IPR001304 (PROSITE_PROFILES); IPR016187 (SUPERFAMILY); TMhelix (TMHMM); TMhelix (TMHMM)                                                                                                                                                                                                       |
| 1659 | 293168_length_1112_cvg_43.5_tip_1_5 | 955  | zonadhesin-like isoform x1                       | 370 | 4.99E-12  | 45.50% | 0.118   | IPR001846 (PFAM); NON_CYTOPLASMIC_DOMAIN (PHOBIUS); NON_CYTOPLASMIC_DOMAIN (PHOBIUS); CYTOPLASMIC_DOMAIN (PHOBIUS); TRANSMEMBRANE (PHOBIUS); TRANSMEMBRANE (PHOBIUS); IPR001846 (PROSITE_PROFILES); TMhelix (TMHMM)                                                                                                                                                                                                                                                                                                                                                      |
| 1660 | 293190_length_1113_cvg_8.9_tip_1_3  | 134  | inactive dipeptidyl peptidase 10                 | 371 | 3.76E-99  | 58.80% | 0.104   | IPR002469 (PFAM); IPR029058 (G3DSA:3.40.50.GENE3D); IPR002469 (G3DSA:2.140.10.GENE3D); PTHR11731 (PANTHER); PTHR11731:SF93 (PANTHER); SSF82171 (SUPERFAMILY)                                                                                                                                                                                                                                                                                                                                                                                                             |
| 1661 | 293208_length_1113_cvg_6.1_tip_1_1  | 102  | titin- partial                                   | 371 | 6.62E-20  | 57.80% | 0.104   | IPR003598 (SMART); IPR003599 (SMART); IPR013783 (G3DSA:2.60.40.GENE3D); IPR013098 (PFAM); PTHR19897 (PANTHER); IPR007110 (PROSITE_PROFILES); SSF48726 (SUPERFAMILY)                                                                                                                                                                                                                                                                                                                                                                                                      |
| 1662 | 293218_length_1114_cvg_7.4_tip_1_4  | 109  | 26s protease regulatory subunit 8                | 371 | 0         | 97.10% | 0.1     | Coil (COILS); IPR003593 (SMART); IPR005937 (TIGRFAM); G3DSA:1.10.8.60 (GENE3D); IPR003959 (PFAM); IPR027417 (G3DSA:3.40.50.GENE3D); PTHR23073:SF12 (PANTHER); PTHR23073 (PANTHER); IPR003960 (PROSITE_PATTERNS); IPR027417 (SUPERFAMILY)                                                                                                                                                                                                                                                                                                                                 |
| 1663 | 293264_length_1116_cvg_50.3_tip_1_4 | 814  | alpha-n-acetylgalactosaminidase-like isoform x1  | 372 | 2.37E-146 | 87.00% | 0.102   | IPR002241 (PRINTS); IPR013785 (G3DSA:3.20.20.GENE3D); IPR013780 (G3DSA:2.60.40.GENE3D); PTHR11452:SF23 (PANTHER); PTHR11452 (PANTHER); IPR017853 (SUPERFAMILY); SSF51011 (SUPERFAMILY)                                                                                                                                                                                                                                                                                                                                                                                   |
| 1664 | 293284_length_1117_cvg_65.3_tip_1_2 | 1841 | epoxide hydrolase 4                              | 372 | 1.76E-104 | 62.20% | 0.091   | IPR000639 (PRINTS); IPR000073 (PRINTS); IPR000073 (PFAM); IPR029058 (G3DSA:3.40.50.GENE3D); PTHR10992 (PANTHER); PTHR10992:SF721 (PANTHER); NON_CYTOPLASMIC_DOMAIN (PHOBIUS); CYTOPLASMIC_DOMAIN (PHOBIUS); TRANSMEMBRANE (PHOBIUS); IPR029058 (SUPERFAMILY); TMhelix (TMHMM)                                                                                                                                                                                                                                                                                            |
| 1665 | 293326_length_1119_cvg_9.0_tip_1_1  | 124  | acyl- delta desaturase                           | 373 | 1.73E-159 | 76.60% | 0.204   | IPR015876 (PRINTS); IPR005804 (PFAM); PTHR11351 (PANTHER); PTHR11351:SF28 (PANTHER); CYTOPLASMIC_DOMAIN (PHOBIUS); CYTOPLASMIC_DOMAIN (PHOBIUS); CYTOPLASMIC_DOMAIN (PHOBIUS); TRANSMEMBRANE (PHOBIUS); TRANSMEMBRANE (PHOBIUS); NON_CYTOPLASMIC_DOMAIN (PHOBIUS); TRANSMEMBRANE (PHOBIUS); NON_CYTOPLASMIC_DOMAIN (PHOBIUS); TRANSMEMBRANE (PHOBIUS); TMhelix (TMHMM); TMhelix (TMHMM); TMhelix (TMHMM); TMhelix (TMHMM)                                                                                                                                                |



|      |                                     |     |                                                                          |     |           |        |         |                                                                                                                                                                                                                                                                                                                                                                                                                                                                                                                                                                                                                    |
|------|-------------------------------------|-----|--------------------------------------------------------------------------|-----|-----------|--------|---------|--------------------------------------------------------------------------------------------------------------------------------------------------------------------------------------------------------------------------------------------------------------------------------------------------------------------------------------------------------------------------------------------------------------------------------------------------------------------------------------------------------------------------------------------------------------------------------------------------------------------|
| 1666 | 293364_length_1121_cvg_27.9_tip_1_2 | 402 | serine protease                                                          | 373 | 2.54E-39  | 52.60% | 0.31    | IPR001314 (PRINTS); IPR001254 (SMART); G3DSA:2.40.10.10 (GENE3D); G3DSA:2.40.10.10 (GENE3D); IPR001254 (PFAM); PTHR24256 (PANTHER); IPR001254 (PROSITE_PROFILES); IPR009003 (SUPERFAMILY)                                                                                                                                                                                                                                                                                                                                                                                                                          |
| 1667 | 293454_length_1126_cvg_4.2_tip_1_4  | 73  | lipophorin precursor                                                     | 375 | 2.29E-68  | 52.10% | 0.209   | IPR009454 (PFAM); IPR015255 (PFAM); IPR015817 (G3DSA:2.20.50.GENE3D); IPR015818 (G3DSA:2.20.80.GENE3D); PTHR23345 (PANTHER); IPR015819 (SUPERFAMILY)                                                                                                                                                                                                                                                                                                                                                                                                                                                               |
| 1668 | 293476_length_1127_cvg_5.1_tip_1_3  | 76  | low quality protein: leucine-rich repeat-containing protein ddb_g0290503 | 376 | 4.59E-60  | 59.10% | 0.096   | Coil (COILS); Coil (COILS); Coil (COILS); Coil (COILS); Coil (COILS); Coil (COILS)                                                                                                                                                                                                                                                                                                                                                                                                                                                                                                                                 |
| 1669 | 293482_length_1128_cvg_6.1_tip_1_5  | 86  | transcription initiation factor tfiid subunit 5                          | 376 | 0         | 84.50% | 0.13    | IPR020472 (PRINTS); IPR001680 (SMART); IPR015943 (G3DSA:2.130.10.GENE3D); IPR001680 (PFAM); PTHR19879 (PANTHER); PTHR19879:SF1 (PANTHER); IPR019775 (PROSITE_PATTERNS); IPR019775 (PROSITE_PATTERNS); IPR001680 (PROSITE_PROFILES); IPR001680 (PROSITE_PROFILES); IPR017986 (PROSITE_PROFILES); IPR001680 (PROSITE_PROFILES); IPR001680 (PROSITE_PROFILES); IPR001680 (PROSITE_PROFILES); IPR001680 (PROSITE_PROFILES); IPR017986 (SUPERFAMILY)                                                                                                                                                                    |
| 1671 | 293522_length_1129_cvg_11.9_tip_1_4 | 211 | low quality protein: selenoprotein h                                     | 376 | 5.14E-20  | 65.40% | 0.107   | IPR020478 (PRINTS); IPR017956 (SMART); IPR012336 (G3DSA:3.40.30.GENE3D); IPR011893 (TIGRFAM); IPR011893 (PFAM); IPR017956 (PFAM); IPR012336 (SUPERFAMILY)                                                                                                                                                                                                                                                                                                                                                                                                                                                          |
| 1670 | 293514_length_1129_cvg_5.2_tip_1_0  | 66  | zinc finger protein 467                                                  | 377 | 5.94E-17  | 42.80% | 0.096   | IPR015880 (SMART); PF13912 (PFAM); IPR013087 (G3DSA:3.30.160.GENE3D); IPR013087 (G3DSA:3.30.160.GENE3D); PF13894 (PFAM); PTHR24409 (PANTHER); IPR007087 (PROSITE_PATTERNS); IPR007087 (PROSITE_PATTERNS); IPR007087 (PROSITE_PATTERNS); IPR007087 (PROSITE_PROFILES); IPR007087 (PROSITE_PROFILES); IPR007087 (PROSITE_PROFILES); IPR007087 (PROSITE_PROFILES); SSF57802 (SUPERFAMILY); SSF57667 (SUPERFAMILY)                                                                                                                                                                                                     |
| 1672 | 293538_length_1130_cvg_8.0_tip_1_4  | 106 | neuroparsin-like protein                                                 | 377 | 1.26E-18  | 61.30% | 0.121   | IPR010850 (PFAM); IPR011390 (PANTHER); NON_CYTOPLASMIC_DOMAIN (PHOBIUS); CYTOPLASMIC_DOMAIN (PHOBIUS); TRANSMEMBRANE (PHOBIUS); TRANSMEMBRANE (PHOBIUS); NON_CYTOPLASMIC_DOMAIN (PHOBIUS); TRANSMEMBRANE (PHOBIUS); IPR010850 (PRODOM); IPR009030 (SUPERFAMILY); TMhelix (TMHMM); TMhelix (TMHMM)                                                                                                                                                                                                                                                                                                                  |
| 1673 | 293556_length_1132_cvg_29.4_tip_1_0 | 367 | dehydrogenase reductase sdr family member 7                              | 378 | 3.75E-109 | 67.50% | 0.922 Y | IPR002198 (PRINTS); IPR002347 (PRINTS); IPR002198 (PFAM); IPR016040 (G3DSA:3.40.50.GENE3D); PTHR24322 (PANTHER); PTHR24322:SF31 (PANTHER); CYTOPLASMIC_DOMAIN (PHOBIUS); SIGNAL_PEPTIDE (PHOBIUS); SIGNAL_PEPTIDE_C_REGION (PHOBIUS); NON_CYTOPLASMIC_DOMAIN (PHOBIUS); SIGNAL_PEPTIDE_N_REGION (PHOBIUS); SIGNAL_PEPTIDE_H_REGION (PHOBIUS); TRANSMEMBRANE (PHOBIUS); SignalP-noTM (SIGNALP_EUK); SSF51735 (SUPERFAMILY); TMhelix (TMHMM); TMhelix (TMHMM)                                                                                                                                                        |
| 1674 | 293566_length_1132_cvg_48.3_tip_1_0 | 590 | low quality protein: galectin-4                                          | 378 | 1.06E-51  | 50.50% | 0.162   | IPR001079 (SMART); IPR001079 (SMART); IPR013320 (G3DSA:2.60.120.GENE3D); IPR013320 (G3DSA:2.60.120.GENE3D); IPR001079 (PFAM); PTHR11346 (PANTHER); CYTOPLASMIC_DOMAIN (PHOBIUS); TRANSMEMBRANE (PHOBIUS); NON_CYTOPLASMIC_DOMAIN (PHOBIUS); IPR001079 (PROSITE_PROFILES); IPR001079 (PROSITE_PROFILES); IPR013320 (SUPERFAMILY); IPR013320 (SUPERFAMILY); TMhelix (TMHMM)                                                                                                                                                                                                                                          |
| 1675 | 293572_length_1133_cvg_2.4_tip_1_3  | 44  | ankyrin repeat protein                                                   | 378 | 1.34E-18  | 49.20% | 0.107   | IPR002110 (SMART); IPR020683 (G3DSA:1.25.40.GENE3D); IPR020683 (G3DSA:1.25.40.GENE3D); PF13637 (PFAM); IPR020683 (PFAM); PTHR24198 (PANTHER); IPR002110 (PROSITE_PROFILES); IPR020683 (PROSITE_PROFILES); IPR020683 (SUPERFAMILY)                                                                                                                                                                                                                                                                                                                                                                                  |
| 1676 | 293602_length_1134_cvg_28.4_tip_1_1 | 375 | late trypsin                                                             | 378 | 5.25E-49  | 55.70% | 0.897 Y | IPR001314 (PRINTS); IPR001254 (SMART); G3DSA:2.40.10.10 (GENE3D); G3DSA:2.40.10.10 (GENE3D); IPR001254 (PFAM); G3DSA:2.40.10.10 (GENE3D); PTHR24268 (PANTHER); IPR018114 (PROSITE_PATTERNS); IPR018114 (PROSITE_PATTERNS); SIGNAL_PEPTIDE_H_REGION (PHOBIUS); SIGNAL_PEPTIDE (PHOBIUS); CYTOPLASMIC_DOMAIN (PHOBIUS); SIGNAL_PEPTIDE_N_REGION (PHOBIUS); TRANSMEMBRANE (PHOBIUS); SIGNAL_PEPTIDE_C_REGION (PHOBIUS); NON_CYTOPLASMIC_DOMAIN (PHOBIUS); IPR001254 (PROSITE_PROFILES); SignalP-TM (SIGNALP_GRAM_POSITIVE); SignalP-noTM (SIGNALP_EUK); SignalP-noTM (SIGNALP_GRAM_NEGATIVE); IPR009003 (SUPERFAMILY) |
| 1678 | 293632_length_1135_cvg_2.6_tip_1_4  | 38  | cyclin-h                                                                 | 378 | 7.46E-158 | 81.70% | 0.103   | IPR013763 (SMART); IPR013763 (G3DSA:1.10.472.GENE3D); IPR006671 (PFAM); IPR027081 (TIGRFAM); IPR013763 (G3DSA:1.10.472.GENE3D); IPR027081 (PTHR10026:PANTHER); IPR015429 (PANTHER); IPR013763 (SUPERFAMILY); IPR013763 (SUPERFAMILY)                                                                                                                                                                                                                                                                                                                                                                               |

|      |                                     |      |                                                                       |     |           |        |         |                                                                                                                                                                                                                                                                                                                                                                                                                                                                                                   |
|------|-------------------------------------|------|-----------------------------------------------------------------------|-----|-----------|--------|---------|---------------------------------------------------------------------------------------------------------------------------------------------------------------------------------------------------------------------------------------------------------------------------------------------------------------------------------------------------------------------------------------------------------------------------------------------------------------------------------------------------|
| 1677 | 293622_length_1135_cvg_3.8_tip_1_0  | 62   | ste20-related kinase adapter protein alpha                            | 379 | 1.99E-142 | 66.20% | 0.1     | G3DSA:1.10.510.10 (GENE3D); G3DSA:3.30.200.20 (GENE3D); IPR000719 (PFAM); PTHR24361:SF273 (PANTHER); PTHR24361 (PANTHER); IPR000719 (PROSITE_PROFILES); IPR011009 (SUPERFAMILY)                                                                                                                                                                                                                                                                                                                   |
| 1679 | 293646_length_1136_cvg_3.9_tip_1_4  | 53   | protein takeout                                                       | 379 | 5.16E-69  | 57.10% | 0.12    | IPR010562 (SMART); IPR010562 (PFAM); PTHR11008:SF9 (PANTHER); PTHR11008 (PANTHER)                                                                                                                                                                                                                                                                                                                                                                                                                 |
| 1680 | 293660_length_1138_cvg_54.0_tip_1_5 | 1731 | granulins precursor                                                   | 379 | 7.73E-45  | 56.00% | 0.152   | IPR000118 (SMART); IPR000118 (PFAM); PTHR12274:SF1 (PANTHER); PTHR12274 (PANTHER); IPR000118 (PROSITE_PATTERNS); IPR000118 (PROSITE_PATTERNS); SSF57277 (SUPERFAMILY); SSF57277 (SUPERFAMILY)                                                                                                                                                                                                                                                                                                     |
| 1681 | 293692_length_1140_cvg_15.2_tip_1_2 | 224  | lysosomal acid phosphatase                                            | 380 | 7.10E-118 | 66.50% | 0.585 Y | IPR029033 (G3DSA:3.40.50.GENE3D); IPR000560 (PFAM); PTHR11567 (PANTHER); PTHR11567:SF26 (PANTHER); IPR000560 (PROSITE_PATTERNS); IPR000560 (PROSITE_PATTERNS); NON_CYTOPLASMIC_DOMAIN (PHOBIUS); SIGNAL_PEPTIDE_C_REGION (PHOBIUS); SIGNAL_PEPTIDE (PHOBIUS); SIGNAL_PEPTIDE_H_REGION (PHOBIUS); SIGNAL_PEPTIDE_N_REGION (PHOBIUS); SignalP-noTM (SIGNALP_GRAM_NEGATIVE); SignalP-noTM (SIGNALP_EUK); IPR029033 (SUPERFAMILY)                                                                     |
| 1682 | 293714_length_1141_cvg_2.3_tip_1_3  | 42   | s-antigen partial                                                     | 381 | 1.27E-34  | 62.00% | 0.111   | Coil (COILS); Coil (COILS); Coil (COILS)                                                                                                                                                                                                                                                                                                                                                                                                                                                          |
| 1683 | 293792_length_1147_cvg_62.0_tip_1_4 | 4870 | transmembrane protease serine 13                                      | 382 | 8.97E-11  | 47.90% | 0.133   | IPR001254 (SMART); IPR001254 (PFAM); G3DSA:2.40.10.10 (GENE3D); TRANSMEMBRANE (PHOBIUS); NON_CYTOPLASMIC_DOMAIN (PHOBIUS); CYTOPLASMIC_DOMAIN (PHOBIUS); IPR001254 (PROSITE_PROFILES); IPR009003 (SUPERFAMILY); TMhelix (TMHMM)                                                                                                                                                                                                                                                                   |
| 1684 | 293818_length_1149_cvg_5.0_tip_1_2  | 87   | mam and ldl-receptor class a domain-containing protein c10orf112-like | 383 | 1.93E-07  | 51.00% | 0.111   | IPR000998 (SMART); IPR000998 (PFAM); PTHR23282 (PANTHER); TRANSMEMBRANE (PHOBIUS); CYTOPLASMIC_DOMAIN (PHOBIUS); NON_CYTOPLASMIC_DOMAIN (PHOBIUS); IPR000998 (PROSITE_PROFILES); IPR013320 (SUPERFAMILY); TMhelix (TMHMM)                                                                                                                                                                                                                                                                         |
| 1685 | 293848_length_1151_cvg_71.6_tip_1_5 | 1886 | zinc metalloproteinase nas-4-like                                     | 383 | 7.18E-50  | 58.70% | 0.21    | IPR001506 (PRINTS); IPR002557 (SMART); IPR006026 (SMART); IPR002557 (PFAM); IPR024079 (G3DSA:3.40.390.GENE3D); IPR001506 (PFAM); IPR002557 (G3DSA:2.170.140.GENE3D); PTHR10127 (PANTHER); NON_CYTOPLASMIC_DOMAIN (PHOBIUS); TRANSMEMBRANE (PHOBIUS); CYTOPLASMIC_DOMAIN (PHOBIUS); NON_CYTOPLASMIC_DOMAIN (PHOBIUS); TRANSMEMBRANE (PHOBIUS); IPR002557 (PROSITE_PROFILES); IPR002557 (SUPERFAMILY); SSF55486 (SUPERFAMILY); TMhelix (TMHMM)                                                      |
| 1686 | 293910_length_1154_cvg_6.7_tip_1_2  | 95   | tyrosine-protein kinase src64b                                        | 384 | 2.92E-141 | 73.70% | 0.099   | IPR000980 (PRINTS); IPR001452 (PRINTS); IPR020635 (SMART); IPR001452 (SMART); IPR000980 (SMART); IPR001452 (PFAM); G3DSA:3.30.200.20 (GENE3D); IPR000980 (G3DSA:3.30.505.GENE3D); IPR000980 (PFAM); G3DSA:2.30.30.40 (GENE3D); IPR001245 (PFAM); PTHR24418:SF35 (PANTHER); PTHR24418 (PANTHER); IPR017441 (PROSITE_PATTERNS); IPR000980 (PROSITE_PROFILES); IPR001452 (PROSITE_PROFILES); IPR000719 (PROSITE_PROFILES); IPR011009 (SUPERFAMILY); IPR000980 (SUPERFAMILY); IPR001452 (SUPERFAMILY) |
| 1687 | 293930_length_1155_cvg_18.5_tip_1_1 | 257  | multicopper oxidase                                                   | 385 | 1.49E-55  | 63.80% | 0.101   | IPR008972 (G3DSA:2.60.40.GENE3D); IPR011706 (PFAM); PTHR11709 (PANTHER); PTHR11709:SF33 (PANTHER); IPR002355 (PROSITE_PATTERNS); TRANSMEMBRANE (PHOBIUS); TRANSMEMBRANE (PHOBIUS); CYTOPLASMIC_DOMAIN (PHOBIUS); CYTOPLASMIC_DOMAIN (PHOBIUS); NON_CYTOPLASMIC_DOMAIN (PHOBIUS); IPR008972 (SUPERFAMILY); TMhelix (TMHMM); TMhelix (TMHMM)                                                                                                                                                        |
| 1688 | 293960_length_1157_cvg_12.7_tip_1_5 | 167  | thioredoxin-like protein 1                                            | 385 | 5.73E-154 | 81.30% | 0.132   | PR00421 (PRINTS); IPR012336 (G3DSA:3.40.30.GENE3D); IPR010400 (G3DSA:2.60.120.GENE3D); IPR013766 (PFAM); IPR010400 (PFAM); IPR005746 (PANTHER); IPR017937 (PROSITE_PATTERNS); IPR010400 (PROSITE_PROFILES); IPR012336 (PROSITE_PROFILES); IPR008979 (SUPERFAMILY); IPR012336 (SUPERFAMILY)                                                                                                                                                                                                        |
| 1689 | 293970_length_1158_cvg_7.8_tip_1_3  | 105  | ankyrin repeat protein                                                | 386 | 3.81E-17  | 44.40% | 0.129   | IPR002110 (PRINTS); IPR002110 (SMART); IPR020683 (G3DSA:1.25.40.GENE3D); IPR002110 (PFAM); IPR020683 (PFAM); PTHR24198 (PANTHER); IPR002110 (PROSITE_PROFILES); IPR002110 (PROSITE_PROFILES); IPR020683 (PROSITE_PROFILES); IPR002110 (PROSITE_PROFILES); IPR002110 (PROSITE_PROFILES); IPR020683 (SUPERFAMILY)                                                                                                                                                                                   |
| 1690 | 293992_length_1159_cvg_36.3_tip_1_0 | 552  | mite allergen lep d partial                                           | 387 | 4.50E-11  | 46.50% | 0.514 Y | PTHR11008 (PANTHER); PTHR11008:SF13 (PANTHER); NON_CYTOPLASMIC_DOMAIN (PHOBIUS); TRANSMEMBRANE (PHOBIUS); CYTOPLASMIC_DOMAIN (PHOBIUS); SignalP-noTM (SIGNALP_EUK); TMhelix (TMHMM)                                                                                                                                                                                                                                                                                                               |
| 1691 | 294052_length_1163_cvg_5.2_tip_1_1  | 78   | dual specificity mitogen-activated protein kinase kinase 4-like       | 388 | 1.41E-154 | 91.20% | 0.114   | IPR002290 (SMART); IPR000719 (PFAM); G3DSA:3.30.200.20 (GENE3D); G3DSA:1.10.510.10 (GENE3D); PTHR24360:SF46 (PANTHER); PTHR24360 (PANTHER); IPR008271 (PROSITE_PATTERNS); IPR000719 (PROSITE_PROFILES); IPR011009 (SUPERFAMILY)                                                                                                                                                                                                                                                                   |

|      |                                     |      |                                               |     |           |        |         |                                                                                                                                                                                                                                                                                                                                                                                                                                                                                                                                                                                                                    |
|------|-------------------------------------|------|-----------------------------------------------|-----|-----------|--------|---------|--------------------------------------------------------------------------------------------------------------------------------------------------------------------------------------------------------------------------------------------------------------------------------------------------------------------------------------------------------------------------------------------------------------------------------------------------------------------------------------------------------------------------------------------------------------------------------------------------------------------|
| 1692 | 294068_length_1164_cvg_5.9_tip_1_4  | 91   | spermatogenesis-associated protein 20         | 388 | 7.60E-173 | 72.20% | 0.099   | IPR004879 (PFAM); IPR012341 (G3DSA:1.50.10.GENE3D); PTHR12145:SF11 (PANTHER); PTHR12145 (PANTHER); IPR008928 (SUPERFAMILY)                                                                                                                                                                                                                                                                                                                                                                                                                                                                                         |
| 1693 | 294072_length_1164_cvg_12.4_tip_1_0 | 149  | apolipoprotein d-like                         | 388 | 6.95E-31  | 65.20% | 0.144   | IPR012674 (G3DSA:2.40.128.GENE3D); IPR000566 (PFAM); PTHR10612 (PANTHER); CYTOPLASMIC_DOMAIN (PHOBIUS); NON_CYTOPLASMIC_DOMAIN (PHOBIUS); TRANSMEMBRANE (PHOBIUS); IPR011038 (SUPERFAMILY); TMhelix (TMHMM); TMhelix (TMHMM); TMhelix (TMHMM)                                                                                                                                                                                                                                                                                                                                                                      |
| 1694 | 294104_length_1165_cvg_47.2_tip_1_3 | 745  | prophenoloxidase activating factor            | 389 | 2.88E-130 | 67.70% | 0.12    | IPR001314 (PRINTS); IPR001254 (SMART); IPR001254 (PFAM); G3DSA:2.40.10.10 (GENE3D); G3DSA:2.40.10.10 (GENE3D); G3DSA:2.40.10.10 (GENE3D); PTHR24268:SF95 (PANTHER); PTHR24268 (PANTHER); IPR018114 (PROSITE_PATTERNS); IPR001254 (PROSITE_PROFILES); IPR009003 (SUPERFAMILY)                                                                                                                                                                                                                                                                                                                                       |
| 1695 | 294114_length_1166_cvg_3.6_tip_1_0  | 87   | er membrane protein complex subunit 10        | 389 | 2.28E-73  | 63.10% | 0.672 Y | IPR029615 (PTHR21397:PANTHER); PTHR21397 (PANTHER); TRANSMEMBRANE (PHOBIUS); TRANSMEMBRANE (PHOBIUS); CYTOPLASMIC_DOMAIN (PHOBIUS); TRANSMEMBRANE (PHOBIUS); CYTOPLASMIC_DOMAIN (PHOBIUS); NON_CYTOPLASMIC_DOMAIN (PHOBIUS); CYTOPLASMIC_DOMAIN (PHOBIUS); NON_CYTOPLASMIC_DOMAIN (PHOBIUS); TRANSMEMBRANE (PHOBIUS); SignalP-noTM (SIGNALP_EUK); TMhelix (TMHMM); TMhelix (TMHMM); TMhelix (TMHMM); TMhelix (TMHMM)                                                                                                                                                                                               |
| 1696 | 294130_length_1167_cvg_22.8_tip_1_2 | 307  | dnaj homolog subfamily b member 6-like        | 389 | 5.36E-77  | 67.80% | 0.214   | Coil (COILS); IPR001623 (PRINTS); IPR001623 (SMART); IPR001623 (PFAM); IPR001623 (G3DSA:1.10.287.GENE3D); PTHR24077:SF225 (PANTHER); PTHR24077 (PANTHER); IPR018253 (PROSITE_PATTERNS); IPR001623 (PROSITE_PROFILES); IPR001623 (SUPERFAMILY)                                                                                                                                                                                                                                                                                                                                                                      |
| 1698 | 294154_length_1168_cvg_70.1_tip_0_1 | 3947 | twitchin isoform x2                           | 389 | 4.22E-139 | 76.40% | 0.101   | IPR003598 (SMART); IPR003599 (SMART); IPR013783 (G3DSA:2.60.40.GENE3D); IPR013783 (G3DSA:2.60.40.GENE3D); IPR013098 (PFAM); IPR013783 (G3DSA:2.60.40.GENE3D); PTHR19897 (PANTHER); IPR007110 (PROSITE_PROFILES); IPR007110 (PROSITE_PROFILES); IPR007110 (PROSITE_PROFILES); SSF48726 (SUPERFAMILY); SSF48726 (SUPERFAMILY); SSF48726 (SUPERFAMILY)                                                                                                                                                                                                                                                                |
| 1697 | 294150_length_1168_cvg_5.0_tip_1_3  | 75   | subtilisin-like protease spc6a                | 390 | 1.83E-64  | 59.60% | 0.378 Y | IPR002884 (PFAM); IPR000209 (PFAM); IPR000209 (G3DSA:3.40.50.GENE3D); IPR008979 (G3DSA:2.60.120.GENE3D); IPR015500 (PANTHER); PTHR10795:SF340 (PANTHER); IPR023828 (PROSITE_PATTERNS); IPR000209 (SUPERFAMILY); IPR008979 (SUPERFAMILY)                                                                                                                                                                                                                                                                                                                                                                            |
| 1699 | 294174_length_1170_cvg_44.4_tip_1_3 | 650  | meprin a subunit beta                         | 390 | 6.47E-51  | 58.20% | 0.199   | IPR001506 (PRINTS); IPR006026 (SMART); IPR001506 (PFAM); IPR024079 (G3DSA:3.40.390.GENE3D); PTHR10127 (PANTHER); SSF55486 (SUPERFAMILY)                                                                                                                                                                                                                                                                                                                                                                                                                                                                            |
| 1700 | 294306_length_1179_cvg_4.9_tip_1_1  | 60   | low quality protein: titin-like               | 393 | 2.38E-180 | 81.00% | 0.099   | IPR003599 (SMART); IPR003598 (SMART); IPR010939 (PFAM); IPR013783 (G3DSA:2.60.40.GENE3D); IPR013098 (PFAM); IPR013783 (G3DSA:2.60.40.GENE3D); PTHR19897 (PANTHER); PTHR19897:SF149 (PANTHER); IPR007110 (PROSITE_PROFILES); IPR007110 (PROSITE_PROFILES); IPR007110 (PROSITE_PROFILES); SSF48726 (SUPERFAMILY); SSF48726 (SUPERFAMILY); SSF48726 (SUPERFAMILY)                                                                                                                                                                                                                                                     |
| 1701 | 294342_length_1182_cvg_14.8_tip_1_4 | 207  | gpi-anchor transamidase                       | 394 | 0         | 85.60% | 0.781 Y | IPR001096 (PRINTS); IPR001096 (PIRSF); IPR028361 (PIRSF); IPR001096 (PFAM); IPR001096 (PANTHER); IPR028361 (PTHR12000:PANTHER); SIGNAL_PEPTIDE_N_REGION (PHOBIUS); NON_CYTOPLASMIC_DOMAIN (PHOBIUS); SIGNAL_PEPTIDE (PHOBIUS); SIGNAL_PEPTIDE_C_REGION (PHOBIUS); SIGNAL_PEPTIDE_H_REGION (PHOBIUS); SignalP-noTM (SIGNALP_GRAM_NEGATIVE); SignalP-TM (SIGNALP_GRAM_POSITIVE); SignalP-noTM (SIGNALP_EUK)                                                                                                                                                                                                          |
| 1702 | 294350_length_1182_cvg_68.3_tip_1_0 | 1245 | kazal-type serine protease inhibitor 1 serpin | 394 | 4.64E-10  | 61.00% | 0.868 Y | IPR002350 (SMART); G3DSA:3.30.60.30 (GENE3D); IPR002350 (PFAM); IPR002350 (PROSITE_PATTERNS); SIGNAL_PEPTIDE_N_REGION (PHOBIUS); CYTOPLASMIC_DOMAIN (PHOBIUS); CYTOPLASMIC_DOMAIN (PHOBIUS); TRANSMEMBRANE (PHOBIUS); SIGNAL_PEPTIDE_C_REGION (PHOBIUS); NON_CYTOPLASMIC_DOMAIN (PHOBIUS); TRANSMEMBRANE (PHOBIUS); SIGNAL_PEPTIDE (PHOBIUS); SIGNAL_PEPTIDE_H_REGION (PHOBIUS); NON_CYTOPLASMIC_DOMAIN (PHOBIUS); TRANSMEMBRANE (PHOBIUS); IPR002350 (PROSITE_PROFILES); SignalP-noTM (SIGNALP_EUK); SSF100895 (SUPERFAMILY); TMhelix (TMHMM); TMhelix (TMHMM); TMhelix (TMHMM); TMhelix (TMHMM); TMhelix (TMHMM) |

|      |                                     |      |                                                                                                                      |     |           |        |         |                                                                                                                                                                                                                                                                                                                                                                                                                                                                                                                  |
|------|-------------------------------------|------|----------------------------------------------------------------------------------------------------------------------|-----|-----------|--------|---------|------------------------------------------------------------------------------------------------------------------------------------------------------------------------------------------------------------------------------------------------------------------------------------------------------------------------------------------------------------------------------------------------------------------------------------------------------------------------------------------------------------------|
| 1703 | 294368_length_1183_cvg_37.9_tip_1_3 | 592  | md-2-related lipid-recognition                                                                                       | 395 | 9.15E-17  | 50.50% | 0.401 Y | IPR003172 (SMART); IPR003172 (PFAM); IPR003172 (G3DSA:2.60.40.GENE3D); PTHR11306 (PANTHER); TRANSMEMBRANE (PHOBIUS); CYTOPLASMIC_DOMAIN (PHOBIUS); NON_CYTOPLASMIC_DOMAIN (PHOBIUS); TRANSMEMBRANE (PHOBIUS); NON_CYTOPLASMIC_DOMAIN (PHOBIUS); TRANSMEMBRANE (PHOBIUS); CYTOPLASMIC_DOMAIN (PHOBIUS); CYTOPLASMIC_DOMAIN (PHOBIUS); IPR014756 (SUPERFAMILY)                                                                                                                                                     |
| 1704 | 294406_length_1187_cvg_3.7_tip_1_1  | 62   | huga_polan ame: full=hyaluronidase short=hya ame: full=hyaluronoglucosaminidase ame: allergen=pol a 2 flags: partial | 396 | 1.73E-72  | 57.00% | 0.407 Y | IPR001329 (PRINTS); IPR018155 (PRINTS); IPR018155 (PFAM); IPR013785 (G3DSA:3.20.20.GENE3D); IPR018155 (PANTHER); PTHR11769:SF8 (PANTHER); SIGNAL_PEPTIDE (PHOBIUS); SIGNAL_PEPTIDE_C_REGION (PHOBIUS); SIGNAL_PEPTIDE_H_REGION (PHOBIUS); SIGNAL_PEPTIDE_N_REGION (PHOBIUS); NON_CYTOPLASMIC_DOMAIN (PHOBIUS); IPR017853 (SUPERFAMILY)                                                                                                                                                                           |
| 1705 | 294414_length_1188_cvg_5.0_tip_1_3  | 116  | hyaluronidase precursor                                                                                              | 396 | 4.70E-80  | 60.40% | 0.287   | IPR001329 (PRINTS); IPR018155 (PRINTS); IPR018155 (PFAM); IPR013785 (G3DSA:3.20.20.GENE3D); PTHR11769:SF8 (PANTHER); IPR018155 (PANTHER); NON_CYTOPLASMIC_DOMAIN (PHOBIUS); CYTOPLASMIC_DOMAIN (PHOBIUS); TRANSMEMBRANE (PHOBIUS); IPR017853 (SUPERFAMILY); TMhelix (TMHMM)                                                                                                                                                                                                                                      |
| 1706 | 294424_length_1188_cvg_12.0_tip_1_2 | 185  | titin isoform x1                                                                                                     | 396 | 9.38E-36  | 45.30% | 0.103   | Coil (COILS); Coil (COILS); Coil (COILS); IPR003599 (SMART); IPR003598 (SMART); IPR013783 (G3DSA:2.60.40.GENE3D); IPR013098 (PFAM); PTHR19897 (PANTHER); IPR007110 (PROSITE_PROFILES); SSF48726 (SUPERFAMILY)                                                                                                                                                                                                                                                                                                    |
| 1707 | 294510_length_1194_cvg_27.0_tip_1_1 | 406  | 26s protease regulatory subunit 10b                                                                                  | 398 | 0         | 96.70% | 0.097   | Coil (COILS); IPR003593 (SMART); IPR027417 (G3DSA:3.40.50.GENE3D); IPR003959 (PFAM); G3DSA:1.10.8.60 (GENE3D); IPR005937 (TIGRFAM); PTHR23073 (PANTHER); PTHR23073:SF24 (PANTHER); IPR003960 (PROSITE_PATTERNS); IPR027417 (SUPERFAMILY)                                                                                                                                                                                                                                                                         |
| 1708 | 294540_length_1196_cvg_33.5_tip_1_5 | 599  | hemagglutinin proteinase                                                                                             | 398 | 1.25E-43  | 48.80% | 0.128   | IPR023612 (PRINTS); IPR013856 (G3DSA:3.10.170.GENE3D); IPR011096 (PFAM); IPR025711 (PFAM); IPR013856 (PFAM); TRANSMEMBRANE (PHOBIUS); NON_CYTOPLASMIC_DOMAIN (PHOBIUS); CYTOPLASMIC_DOMAIN (PHOBIUS); SSF55486 (SUPERFAMILY)                                                                                                                                                                                                                                                                                     |
| 1709 | 294542_length_1196_cvg_30.3_tip_1_1 | 467  | agap005608-pa-like protein                                                                                           | 399 | 1.72E-147 | 76.40% | 0.131   | Coil (COILS); Coil (COILS); IPR011992 (PFAM); IPR011992 (G3DSA:1.10.238.GENE3D); PTHR19237 (PANTHER); PTHR19237:SF20 (PANTHER); IPR018247 (PROSITE_PATTERNS); CYTOPLASMIC_DOMAIN (PHOBIUS); NON_CYTOPLASMIC_DOMAIN (PHOBIUS); TRANSMEMBRANE (PHOBIUS); IPR002048 (PROSITE_PROFILES); IPR002048 (PROSITE_PROFILES); SSF47473 (SUPERFAMILY); TMhelix (TMHMM)                                                                                                                                                       |
| 1710 | 294602_length_1201_cvg_7.5_tip_1_5  | 123  | 3-hydroxyisobutyrate dehydrogenase                                                                                   | 400 | 8.41E-78  | 57.20% | 0.394 Y | IPR013328 (G3DSA:1.10.1040.GENE3D); IPR006115 (PFAM); IPR029154 (PFAM); IPR016040 (G3DSA:3.40.50.GENE3D); PTHR22981:SF7 (PANTHER); PTHR22981 (PANTHER); IPR029752 (PROSITE_PATTERNS); IPR008927 (SUPERFAMILY); SSF51735 (SUPERFAMILY)                                                                                                                                                                                                                                                                            |
| 1711 | 294622_length_1202_cvg_61.5_tip_1_2 | 2513 | guanine nucleotide-binding protein subunit beta-like protein                                                         | 400 | 0         | 93.10% | 0.136   | IPR020472 (PRINTS); IPR001680 (SMART); IPR015943 (G3DSA:2.130.10.GENE3D); IPR001680 (PFAM); IPR015943 (G3DSA:2.130.10.GENE3D); PTHR19868:SF0 (PANTHER); PTHR19868 (PANTHER); IPR019775 (PROSITE_PATTERNS); IPR019775 (PROSITE_PATTERNS); IPR019775 (PROSITE_PATTERNS); IPR019775 (PROSITE_PATTERNS); IPR001680 (PROSITE_PROFILES); IPR001680 (PROSITE_PROFILES); IPR001680 (PROSITE_PROFILES); IPR001680 (PROSITE_PROFILES); IPR001680 (PROSITE_PROFILES); IPR017986 (PROSITE_PROFILES); IPR017986 (SUPERFAMILY) |
| 1712 | 294624_length_1202_cvg_41.8_tip_1_5 | 653  | mitochondrial matrix protein p33                                                                                     | 400 | 3.87E-86  | 67.40% | 0.14    | IPR003428 (G3DSA:3.10.280.GENE3D); IPR003428 (PFAM); PTHR10826 (PANTHER); PTHR10826:SF1 (PANTHER); IPR003428 (SUPERFAMILY)                                                                                                                                                                                                                                                                                                                                                                                       |
| 1713 | 294656_length_1204_cvg_2.9_tip_1_1  | 50   | neural cell adhesion molecule 1 isoform x1                                                                           | 401 | 4.14E-50  | 52.60% | 0.111   | IPR003598 (SMART); IPR003599 (SMART); IPR013098 (PFAM); IPR013783 (G3DSA:2.60.40.GENE3D); IPR013783 (G3DSA:2.60.40.GENE3D); PTHR19831 (PANTHER); PTHR19831:SF40 (PANTHER); CYTOPLASMIC_DOMAIN (PHOBIUS); TRANSMEMBRANE (PHOBIUS); NON_CYTOPLASMIC_DOMAIN (PHOBIUS); IPR003961 (PROSITE_PROFILES); IPR007110 (PROSITE_PROFILES); IPR007110 (PROSITE_PROFILES); IPR003961 (SUPERFAMILY); SSF48726 (SUPERFAMILY); SSF48726 (SUPERFAMILY); TMhelix (TMHMM)                                                           |
| 1721 | 294834_length_1216_cvg_27.1_tip_1_1 | 382  | serine threonine-protein phosphatase 2a catalytic subunit alpha isoform                                              | 401 | 0         | 97.60% | 0.176   | Coil (COILS); IPR006186 (PRINTS); IPR006186 (SMART); IPR004843 (PFAM); IPR029052 (G3DSA:3.60.21.GENE3D); PTHR11668:SF216 (PANTHER); PTHR11668 (PANTHER); IPR006186 (PROSITE_PATTERNS); IPR029052 (SUPERFAMILY)                                                                                                                                                                                                                                                                                                   |
| 1714 | 294680_length_1206_cvg_62.6_tip_1_3 | 1475 | hypothetical protein DAPPUDRAFT_250423                                                                               | 402 | 3.06E-79  | 49.90% | 0.112   | IPR005320 (PFAM); IPR029062 (G3DSA:3.40.50.GENE3D); IPR029062 (SUPERFAMILY)                                                                                                                                                                                                                                                                                                                                                                                                                                      |







|      |                                     |      |                                                                                                                                                                        |     |           |        |         |                                                                                                                                                                                                                                                                                                                                                                                                                                                                                                                                                                                                                                                                                                   |
|------|-------------------------------------|------|------------------------------------------------------------------------------------------------------------------------------------------------------------------------|-----|-----------|--------|---------|---------------------------------------------------------------------------------------------------------------------------------------------------------------------------------------------------------------------------------------------------------------------------------------------------------------------------------------------------------------------------------------------------------------------------------------------------------------------------------------------------------------------------------------------------------------------------------------------------------------------------------------------------------------------------------------------------|
| 1744 | 295324_length_1253_cvg_9.2_tip_1_5  | 132  | atp-dependent rna helicase vasa                                                                                                                                        | 417 | 4.99E-115 | 78.20% | 0.121   | IPR001650 (SMART); IPR011545 (PFAM); IPR027417 (G3DSA:3.40.50.GENE3D); IPR027417 (G3DSA:3.40.50.GENE3D); IPR001650 (PFAM); PTHR24031:SF168 (PANTHER); PTHR24031 (PANTHER); NON_CYTOPLASMIC_DOMAIN (PHOBIUS); TRANSMEMBRANE (PHOBIUS); CYTOPLASMIC_DOMAIN (PHOBIUS); CYTOPLASMIC_DOMAIN (PHOBIUS); NON_CYTOPLASMIC_DOMAIN (PHOBIUS); TRANSMEMBRANE (PHOBIUS); TRANSMEMBRANE (PHOBIUS); IPR014001 (PROSITE_PROFILES); IPR001650 (PROSITE_PROFILES); IPR027417 (SUPERFAMILY)                                                                                                                                                                                                                         |
| 1743 | 295322_length_1253_cvg_24.0_tip_1_0 | 489  | estradiol 17-beta-dehydrogenase 8                                                                                                                                      | 418 | 1.11E-88  | 72.40% | 0.273   | IPR002198 (PRINTS); IPR002347 (PRINTS); IPR013968 (SMART); IPR016040 (G3DSA:3.40.50.GENE3D); IPR002198 (PFAM); PTHR24316 (PANTHER); PTHR24316:SF254 (PANTHER); IPR020904 (PROSITE_PATTERNS); SSF51735 (SUPERFAMILY)                                                                                                                                                                                                                                                                                                                                                                                                                                                                               |
| 1745 | 295374_length_1256_cvg_52.8_tip_1_0 | 867  | isoform b                                                                                                                                                              | 419 | 5.96E-20  | 41.90% | 0.101   | CYTOPLASMIC_DOMAIN (PHOBIUS); TRANSMEMBRANE (PHOBIUS); NON_CYTOPLASMIC_DOMAIN (PHOBIUS); IPR006207 (PROSITE_PROFILES); IPR001007 (PROSITE_PROFILES); TMhelix (TMHMM)                                                                                                                                                                                                                                                                                                                                                                                                                                                                                                                              |
| 1746 | 295408_length_1259_cvg_20.7_tip_1_5 | 291  | achain structure and binding determinants of the recombinant kringle-2 domain of human plasminogen to an internal peptide from a group a streptococcal surface protein | 419 | 1.15E-28  | 63.00% | 0.101   | PR00018 (PRINTS); IPR000001 (SMART); G3DSA:2.40.20.10 (GENE3D); IPR000001 (PFAM); IPR022041 (PFAM); PTHR24259 (PANTHER); IPR018056 (PROSITE_PATTERNS); CYTOPLASMIC_DOMAIN (PHOBIUS); NON_CYTOPLASMIC_DOMAIN (PHOBIUS); TRANSMEMBRANE (PHOBIUS); IPR000001 (PROSITE_PROFILES); IPR013806 (SUPERFAMILY); TMhelix (TMHMM)                                                                                                                                                                                                                                                                                                                                                                            |
| 1747 | 295410_length_1259_cvg_45.2_tip_1_1 | 799  | ves g 5 allergen                                                                                                                                                       | 420 | 5.42E-47  | 52.50% | 0.860 Y | IPR001283 (PRINTS); IPR002413 (PRINTS); IPR014044 (SMART); IPR002172 (SMART); IPR002172 (PFAM); IPR014044 (G3DSA:3.40.33.GENE3D); IPR014044 (PFAM); IPR002172 (G3DSA:4.10.400.GENE3D); IPR001283 (PANTHER); IPR018244 (PROSITE_PATTERNS); IPR023415 (PROSITE_PATTERNS); IPR018244 (PROSITE_PATTERNS); NON_CYTOPLASMIC_DOMAIN (PHOBIUS); CYTOPLASMIC_DOMAIN (PHOBIUS); SIGNAL_PEPTIDE_H_REGION (PHOBIUS); SIGNAL_PEPTIDE_C_REGION (PHOBIUS); TRANSMEMBRANE (PHOBIUS); SIGNAL_PEPTIDE_N_REGION (PHOBIUS); SIGNAL_PEPTIDE (PHOBIUS); IPR002172 (PROSITE_PROFILES); SignalP-noTM (SIGNALP_EUK); SignalP-TM (SIGNALP_GRAM_POSITIVE); IPR014044 (SUPERFAMILY); IPR002172 (SUPERFAMILY); TMhelix (TMHMM) |
| 1748 | 295466_length_1264_cvg_2.0_tip_1_2  | 42   | zinc finger and btb domain-containing protein 24                                                                                                                       | 421 | 7.19E-69  | 57.30% | 0.113   | IPR015880 (SMART); IPR013087 (G3DSA:3.30.160.GENE3D); IPR013087 (G3DSA:3.30.160.GENE3D); PF13894 (PFAM); PF13465 (PFAM); PTHR24409:SF14 (PANTHER); PTHR24409 (PANTHER); IPR007087 (PROSITE_PATTERNS); IPR007087 (PROSITE_PATTERNS); IPR007087 (PROSITE_PATTERNS); IPR007087 (PROSITE_PROFILES); IPR007087 (PROSITE_PROFILES); IPR007087 (PROSITE_PROFILES); SSF57667 (SUPERFAMILY); SSF57667 (SUPERFAMILY)                                                                                                                                                                                                                                                                                        |
| 1749 | 295474_length_1264_cvg_14.3_tip_1_3 | 245  | venom protease-like                                                                                                                                                    | 422 | 6.33E-114 | 58.80% | 0.146   | IPR001314 (PRINTS); IPR001254 (SMART); IPR006604 (SMART); G3DSA:2.40.10.10 (GENE3D); IPR001254 (PFAM); IPR022700 (PFAM); G3DSA:2.40.10.10 (GENE3D); PTHR24268:SF97 (PANTHER); PTHR24268 (PANTHER); IPR018114 (PROSITE_PATTERNS); IPR018114 (PROSITE_PATTERNS); IPR001254 (PROSITE_PROFILES); IPR009003 (SUPERFAMILY)                                                                                                                                                                                                                                                                                                                                                                              |
| 1750 | 295506_length_1267_cvg_68.2_tip_1_0 | 2203 | serine proteinase stubble                                                                                                                                              | 423 | 9.01E-66  | 73.30% | 0.155   | Coil (COILS); IPR001314 (PRINTS); IPR001254 (SMART); G3DSA:2.40.10.10 (GENE3D); IPR001254 (PFAM); PTHR24268:SF95 (PANTHER); PTHR24268 (PANTHER); CYTOPLASMIC_DOMAIN (PHOBIUS); CYTOPLASMIC_DOMAIN (PHOBIUS); TRANSMEMBRANE (PHOBIUS); TRANSMEMBRANE (PHOBIUS); NON_CYTOPLASMIC_DOMAIN (PHOBIUS); NON_CYTOPLASMIC_DOMAIN (PHOBIUS); TRANSMEMBRANE (PHOBIUS); IPR001254 (PROSITE_PROFILES); IPR009003 (SUPERFAMILY); TMhelix (TMHMM); TMhelix (TMHMM)                                                                                                                                                                                                                                               |
| 1751 | 295510_length_1268_cvg_17.4_tip_1_3 | 255  | low affinity immunoglobulin epsilon fc receptor                                                                                                                        | 423 | 1.44E-08  | 51.40% | 0.105   | IPR001304 (PFAM); IPR016186 (G3DSA:3.10.100.GENE3D); PTHR22803 (PANTHER); IPR001304 (PROSITE_PROFILES); IPR016187 (SUPERFAMILY)                                                                                                                                                                                                                                                                                                                                                                                                                                                                                                                                                                   |
| 1752 | 295550_length_1270_cvg_68.1_tip_0_5 | 2242 | low quality protein: twitchin-like                                                                                                                                     | 423 | 4.69E-178 | 78.90% | 0.124   | IPR003598 (SMART); IPR003599 (SMART); IPR013783 (G3DSA:2.60.40.GENE3D); IPR013098 (PFAM); IPR013783 (G3DSA:2.60.40.GENE3D); PTHR19897:SF148 (PANTHER); PTHR19897 (PANTHER); IPR007110 (PROSITE_PROFILES); SSF48726 (SUPERFAMILY); SSF48726 (SUPERFAMILY); SSF48726 (SUPERFAMILY); SSF48726 (SUPERFAMILY)                                                                                                                                                                                                                                                                                                                                                                                          |
| 1753 | 295600_length_1274_cvg_33.3_tip_1_2 | 570  | acid ceramidase                                                                                                                                                        | 424 | 1.93E-157 | 71.60% | 0.680 Y | Coil (COILS); IPR016699 (PIRSF); IPR029130 (PFAM); IPR029132 (PFAM); SignalP-noTM (SIGNALP_EUK)                                                                                                                                                                                                                                                                                                                                                                                                                                                                                                                                                                                                   |
| 1754 | 295622_length_1274_cvg_16.8_tip_1_0 | 344  | adp-ribosylation factor-like protein 8b-a                                                                                                                              | 425 | 3.71E-124 | 97.70% | 0.118   | IPR006689 (PRINTS); IPR024156 (SMART); IPR003579 (SMART); IPR006687 (SMART); IPR006689 (PFAM); IPR027417 (G3DSA:3.40.50.GENE3D); IPR005225 (TIGRFAM); PTHR11711:SF122 (PANTHER); PTHR11711 (PANTHER); IPR024156 (PROSITE_PROFILES); IPR027417 (SUPERFAMILY)                                                                                                                                                                                                                                                                                                                                                                                                                                       |



|      |                                     |      |                                                               |     |           |        |         |                                                                                                                                                                                                                                                                                                                                                                                                                                                                        |
|------|-------------------------------------|------|---------------------------------------------------------------|-----|-----------|--------|---------|------------------------------------------------------------------------------------------------------------------------------------------------------------------------------------------------------------------------------------------------------------------------------------------------------------------------------------------------------------------------------------------------------------------------------------------------------------------------|
| 1767 | 295932_length_1298_cvg_57.5_tip_1_1 | 1543 | phospholipid-hydroperoxide glutathione peroxidase             | 433 | 3.15E-80  | 80.50% | 0.143   | IPR000889 (PRINTS); IPR012336 (G3DSA:3.40.30.GENE3D); IPR000889 (PFAM); IPR000889 (PANTHER); IPR029760 (PROSITE_PATTERNS); CYTOPLASMIC_DOMAIN (PHOBIUS); TRANSMEMBRANE (PHOBIUS); TRANSMEMBRANE (PHOBIUS); CYTOPLASMIC_DOMAIN (PHOBIUS); NON_CYTOPLASMIC_DOMAIN (PHOBIUS); NON_CYTOPLASMIC_DOMAIN (PHOBIUS); TRANSMEMBRANE (PHOBIUS); NON_CYTOPLASMIC_DOMAIN (PHOBIUS); TRANSMEMBRANE (PHOBIUS); IPR000889 (PROSITE_PROFILES); IPR012336 (SUPERFAMILY)                 |
| 1768 | 295984_length_1304_cvg_6.4_tip_1_3  | 90   | 27 kda hemolymph                                              | 435 | 4.38E-45  | 56.10% | 0.148   | IPR009832 (PFAM); PTHR20997 (PANTHER); CYTOPLASMIC_DOMAIN (PHOBIUS); TRANSMEMBRANE (PHOBIUS); CYTOPLASMIC_DOMAIN (PHOBIUS); NON_CYTOPLASMIC_DOMAIN (PHOBIUS); TRANSMEMBRANE (PHOBIUS)                                                                                                                                                                                                                                                                                  |
| 1769 | 296022_length_1306_cvg_8.6_tip_1_2  | 154  | receptor-type tyrosine-protein phosphatase epsilon isoform x1 | 435 | 6.82E-87  | 52.60% | 0.175   | Coil (COILS); IPR000242 (PRINTS); IPR003595 (SMART); IPR000242 (SMART); IPR000242 (PFAM); IPR029021 (G3DSA:3.90.190.GENE3D); IPR029021 (G3DSA:3.90.190.GENE3D); PTHR19134 (PANTHER); IPR016130 (PROSITE_PATTERNS); IPR000242 (PROSITE_PROFILES); IPR000387 (PROSITE_PROFILES); IPR000242 (PROSITE_PROFILES); IPR000387 (PROSITE_PROFILES); IPR029021 (SUPERFAMILY); IPR029021 (SUPERFAMILY)                                                                            |
| 1770 | 296032_length_1307_cvg_6.1_tip_1_3  | 139  | variant surface antigen e                                     | 436 | 5.28E-20  | 44.50% | 0.108   | no IPS match                                                                                                                                                                                                                                                                                                                                                                                                                                                           |
| 1771 | 296142_length_1319_cvg_16.8_tip_1_5 | 333  | epidermal retinol dehydrogenase 2                             | 439 | 1.38E-105 | 71.30% | 0.153   | IPR002347 (PRINTS); IPR002198 (PRINTS); IPR002198 (PFAM); IPR016040 (G3DSA:3.40.50.GENE3D); PTHR24316:SF289 (PANTHER); PTHR24316 (PANTHER); NON_CYTOPLASMIC_DOMAIN (PHOBIUS); CYTOPLASMIC_DOMAIN (PHOBIUS); TRANSMEMBRANE (PHOBIUS); SSF51735 (SUPERFAMILY); TMhelix (TMHMM)                                                                                                                                                                                           |
| 1773 | 296202_length_1322_cvg_11.0_tip_1_5 | 151  | n-acetylglucosamine-1-phosphotransferase subunit gamma-like   | 440 | 4.57E-71  | 59.60% | 0.349 Y | Coil (COILS); IPR009011 (G3DSA:2.70.130.GENE3D); PF13015 (PFAM); PTHR12630 (PANTHER); PTHR12630:SF6 (PANTHER); IPR009011 (SUPERFAMILY)                                                                                                                                                                                                                                                                                                                                 |
| 1772 | 296184_length_1321_cvg_66.3_tip_1_3 | 3356 | apolipoprotein d                                              | 441 | 5.36E-73  | 62.40% | 0.142   | IPR003057 (PRINTS); IPR012674 (G3DSA:2.40.128.GENE3D); IPR000566 (PFAM); PTHR10612 (PANTHER); PTHR10612:SF7 (PANTHER); IPR022272 (PROSITE_PATTERNS); NON_CYTOPLASMIC_DOMAIN (PHOBIUS); CYTOPLASMIC_DOMAIN (PHOBIUS); NON_CYTOPLASMIC_DOMAIN (PHOBIUS); TRANSMEMBRANE (PHOBIUS); TRANSMEMBRANE (PHOBIUS); IPR011038 (SUPERFAMILY); TMhelix (TMHMM); TMhelix (TMHMM)                                                                                                     |
| 1774 | 296220_length_1325_cvg_14.1_tip_1_3 | 295  | gtp-binding protein sar1b                                     | 442 | 1.02E-124 | 93.20% | 0.138   | IPR006689 (PRINTS); IPR006687 (SMART); IPR024156 (SMART); IPR005225 (TIGRFAM); IPR006689 (PFAM); IPR027417 (G3DSA:3.40.50.GENE3D); PTHR11711 (PANTHER); PTHR11711:SF133 (PANTHER); NON_CYTOPLASMIC_DOMAIN (PHOBIUS); TRANSMEMBRANE (PHOBIUS); CYTOPLASMIC_DOMAIN (PHOBIUS); IPR006687 (PROSITE_PROFILES); IPR027417 (SUPERFAMILY)                                                                                                                                      |
| 1775 | 296266_length_1328_cvg_5.9_tip_1_0  | 99   | maltase a5                                                    | 443 | 1.01E-168 | 69.40% | 0.164   | IPR006589 (SMART); IPR006047 (PFAM); IPR013781 (G3DSA:3.20.20.GENE3D); G3DSA:3.90.400.10 (GENE3D); IPR015902 (PANTHER); PTHR10357:SF76 (PANTHER); IPR017853 (SUPERFAMILY)                                                                                                                                                                                                                                                                                              |
| 1776 | 296268_length_1328_cvg_58.4_tip_1_4 | 3867 | low quality protein: glutathione peroxidase 3                 | 443 | 3.87E-59  | 63.90% | 0.21    | IPR012336 (G3DSA:3.40.30.GENE3D); IPR000889 (PFAM); IPR000889 (PANTHER); IPR029760 (PROSITE_PATTERNS); CYTOPLASMIC_DOMAIN (PHOBIUS); TRANSMEMBRANE (PHOBIUS); NON_CYTOPLASMIC_DOMAIN (PHOBIUS); IPR000889 (PROSITE_PROFILES); IPR012336 (SUPERFAMILY); TMhelix (TMHMM)                                                                                                                                                                                                 |
| 1777 | 296276_length_1329_cvg_55.1_tip_0_0 | 1151 | diphenol oxidase                                              | 443 | 4.38E-20  | 65.20% | 0.1     | IPR000436 (SMART); G3DSA:2.10.70.10 (GENE3D); IPR000436 (PFAM); G3DSA:2.10.70.10 (GENE3D); G3DSA:2.10.70.10 (GENE3D); PTHR19325 (PANTHER); IPR000436 (PROSITE_PROFILES); IPR000436 (PROSITE_PROFILES); IPR000436 (PROSITE_PROFILES); IPR000436 (SUPERFAMILY); IPR000436 (SUPERFAMILY); IPR000436 (SUPERFAMILY)                                                                                                                                                         |
| 1778 | 296288_length_1330_cvg_11.1_tip_1_1 | 219  | atpase family aaa domain-containing protein 1-b               | 443 | 4.49E-166 | 78.10% | 0.121   | IPR003593 (SMART); G3DSA:1.10.8.60 (GENE3D); IPR003959 (PFAM); IPR027417 (G3DSA:3.40.50.GENE3D); PTHR23074:SF20 (PANTHER); PTHR23074 (PANTHER); IPR003960 (PROSITE_PATTERNS); IPR027417 (SUPERFAMILY)                                                                                                                                                                                                                                                                  |
| 1779 | 296310_length_1332_cvg_65.4_tip_1_4 | 3284 | scp-like extracellular domain containing protein 1            | 444 | 4.21E-70  | 62.10% | 0.295   | IPR001283 (PRINTS); IPR002413 (PRINTS); IPR014044 (SMART); IPR014044 (G3DSA:3.40.33.GENE3D); IPR014044 (PFAM); PTHR10334:SF174 (PANTHER); IPR001283 (PANTHER); IPR018244 (PROSITE_PATTERNS); IPR018244 (PROSITE_PATTERNS); TRANSMEMBRANE (PHOBIUS); NON_CYTOPLASMIC_DOMAIN (PHOBIUS); CYTOPLASMIC_DOMAIN (PHOBIUS); CYTOPLASMIC_DOMAIN (PHOBIUS); NON_CYTOPLASMIC_DOMAIN (PHOBIUS); TRANSMEMBRANE (PHOBIUS); IPR014044 (SUPERFAMILY); TMhelix (TMHMM); TMhelix (TMHMM) |

|      |                                     |      |                                                               |     |           |        |         |                                                                                                                                                                                                                                                                                                                                                                                                                                                                                                                                                                                                |
|------|-------------------------------------|------|---------------------------------------------------------------|-----|-----------|--------|---------|------------------------------------------------------------------------------------------------------------------------------------------------------------------------------------------------------------------------------------------------------------------------------------------------------------------------------------------------------------------------------------------------------------------------------------------------------------------------------------------------------------------------------------------------------------------------------------------------|
| 1780 | 296312_length_1332_cvg_4.8_tip_1_5  | 94   | glutamate-rich wd repeat-containing protein 1                 | 444 | 1.60E-145 | 74.50% | 0.108   | IPR020472 (PRINTS); IPR001680 (SMART); IPR001680 (PFAM); IPR015943 (G3DSA:2.130.10.GENE3D); PTHR22850 (PANTHER); IPR019775 (PROSITE_PATTERNS); TRANSMEMBRANE (PHOBIUS); CYTOPLASMIC_DOMAIN (PHOBIUS); NON_CYTOPLASMIC_DOMAIN (PHOBIUS); IPR017986 (PROSITE_PROFILES); IPR001680 (PROSITE_PROFILES); IPR001680 (PROSITE_PROFILES); IPR017986 (SUPERFAMILY)                                                                                                                                                                                                                                      |
| 1781 | 296376_length_1337_cvg_27.6_tip_1_0 | 456  | chymotrypsinogen a                                            | 446 | 2.97E-95  | 59.30% | 0.831 Y | IPR001314 (PRINTS); IPR001254 (SMART); G3DSA:2.40.10.10 (GENE3D); G3DSA:2.40.10.10 (GENE3D); G3DSA:2.40.10.10 (GENE3D); IPR001254 (PFAM); PTHR24260:SF47 (PANTHER); PTHR24260 (PANTHER); SIGNAL_PEPTIDE_C_REGION (PHOBIUS); NON_CYTOPLASMIC_DOMAIN (PHOBIUS); SIGNAL_PEPTIDE_N_REGION (PHOBIUS); SIGNAL_PEPTIDE (PHOBIUS); SIGNAL_PEPTIDE_H_REGION (PHOBIUS); IPR001254 (PROSITE_PROFILES); SignalP-noTM (SIGNALP_EUK); IPR009003 (SUPERFAMILY)                                                                                                                                                |
| 1782 | 296382_length_1338_cvg_84.0_tip_1_4 | 2771 | membrane glycoprotein lig-                                    | 446 | 3.02E-20  | 47.60% | 0.434 Y | IPR003591 (SMART); IPR001611 (PFAM); IPR001611 (PFAM); G3DSA:3.80.10.10 (GENE3D); PTHR24365 (PANTHER); SIGNAL_PEPTIDE_C_REGION (PHOBIUS); SIGNAL_PEPTIDE (PHOBIUS); SIGNAL_PEPTIDE_H_REGION (PHOBIUS); SIGNAL_PEPTIDE_N_REGION (PHOBIUS); NON_CYTOPLASMIC_DOMAIN (PHOBIUS); SignalP-TM (SIGNALP_GRAM_POSITIVE); SSF52058 (SUPERFAMILY)                                                                                                                                                                                                                                                         |
| 1783 | 296386_length_1338_cvg_15.4_tip_1_3 | 308  | platelet-activating factor acetylhydrolase                    | 446 | 4.89E-103 | 57.20% | 0.135   | Coil (COILS); IPR016715 (PIRSF); IPR005065 (PFAM); IPR029058 (G3DSA:3.40.50.GENE3D); IPR005065 (PANTHER); IPR029058 (SUPERFAMILY)                                                                                                                                                                                                                                                                                                                                                                                                                                                              |
| 1784 | 296400_length_1340_cvg_12.1_tip_1_0 | 204  | alpha beta hydrolase domain-containing protein 13             | 447 | 2.04E-142 | 75.00% | 0.105   | IPR029059 (PFAM); IPR029058 (G3DSA:3.40.50.GENE3D); PTHR12277 (PANTHER); TRANSMEMBRANE (PHOBIUS); CYTOPLASMIC_DOMAIN (PHOBIUS); TRANSMEMBRANE (PHOBIUS); NON_CYTOPLASMIC_DOMAIN (PHOBIUS); CYTOPLASMIC_DOMAIN (PHOBIUS); CYTOPLASMIC_DOMAIN (PHOBIUS); TRANSMEMBRANE (PHOBIUS); TRANSMEMBRANE (PHOBIUS); NON_CYTOPLASMIC_DOMAIN (PHOBIUS); IPR029058 (SUPERFAMILY); TMhelix (TMHMM); TMhelix (TMHMM)                                                                                                                                                                                           |
| 1785 | 296424_length_1342_cvg_17.6_tip_1_4 | 305  | 3-hydroxyisobutyrate dehydrogenase                            | 447 | 1.35E-65  | 55.40% | 0.16    | IPR006115 (PFAM); IPR013328 (G3DSA:1.10.1040.GENE3D); IPR029154 (PFAM); IPR016040 (G3DSA:3.40.50.GENE3D); PTHR22981:SF7 (PANTHER); IPR029752 (PROSITE_PATTERNS); SSF51735 (SUPERFAMILY); IPR008927 (SUPERFAMILY)                                                                                                                                                                                                                                                                                                                                                                               |
| 1786 | 296444_length_1344_cvg_3.4_tip_1_2  | 73   | zinc finger protein glis2-like                                | 448 | 7.41E-77  | 75.90% | 0.102   | IPR015880 (SMART); PF13465 (PFAM); IPR013087 (G3DSA:3.30.160.GENE3D); IPR013087 (G3DSA:3.30.160.GENE3D); IPR013087 (G3DSA:3.30.160.GENE3D); IPR007087 (PFAM); IPR013087 (G3DSA:3.30.160.GENE3D); IPR013087 (G3DSA:3.30.160.GENE3D); PTHR19818 (PANTHER); IPR007087 (PROSITE_PATTERNS); IPR007087 (PROSITE_PATTERNS); IPR007087 (PROSITE_PATTERNS); IPR007087 (PROSITE_PROFILES); IPR007087 (PROSITE_PROFILES); IPR007087 (PROSITE_PROFILES); IPR007087 (PROSITE_PROFILES); SSF57667 (SUPERFAMILY); SSF57667 (SUPERFAMILY); SSF57667 (SUPERFAMILY)                                              |
| 1787 | 296492_length_1349_cvg_9.8_tip_1_4  | 192  | g-protein coupled receptor mth2-like isoform x2               | 450 | 1.97E-90  | 54.50% | 0.127   | IPR000832 (PFAM); IPR010596 (PFAM); IPR023311 (G3DSA:2.170.180.GENE3D); PTHR12011:SF164 (PANTHER); PTHR12011 (PANTHER); CYTOPLASMIC_DOMAIN (PHOBIUS); NON_CYTOPLASMIC_DOMAIN (PHOBIUS); TRANSMEMBRANE (PHOBIUS); TRANSMEMBRANE (PHOBIUS); NON_CYTOPLASMIC_DOMAIN (PHOBIUS); TRANSMEMBRANE (PHOBIUS); CYTOPLASMIC_DOMAIN (PHOBIUS); NON_CYTOPLASMIC_DOMAIN (PHOBIUS); TRANSMEMBRANE (PHOBIUS); TRANSMEMBRANE (PHOBIUS); CYTOPLASMIC_DOMAIN (PHOBIUS); IPR017981 (PROSITE_PROFILES); SSF63877 (SUPERFAMILY); TMhelix (TMHMM); TMhelix (TMHMM); TMhelix (TMHMM); TMhelix (TMHMM); TMhelix (TMHMM) |
| 1788 | 296506_length_1351_cvg_5.6_tip_1_5  | 115  | mam and ldl-receptor class a domain-containing protein 1-like | 450 | 9.23E-16  | 40.00% | 0.605 Y | IPR002172 (SMART); IPR000998 (SMART); IPR002172 (PFAM); IPR000998 (PFAM); IPR002172 (G3DSA:4.10.400.GENE3D); PTHR23282 (PANTHER); PTHR23282:SF75 (PANTHER); IPR002172 (PROSITE_PROFILES); IPR000998 (PROSITE_PROFILES); IPR000998 (PROSITE_PROFILES); SignalP-noTM (SIGNALP_EUK); IPR013320 (SUPERFAMILY); IPR013320 (SUPERFAMILY); IPR002172 (SUPERFAMILY)                                                                                                                                                                                                                                    |
| 1789 | 296512_length_1353_cvg_26.6_tip_1_0 | 473  | annexin a5-like                                               | 451 | 2.40E-18  | 62.30% | 0.102   | CYTOPLASMIC_DOMAIN (PHOBIUS); TRANSMEMBRANE (PHOBIUS); NON_CYTOPLASMIC_DOMAIN (PHOBIUS); TMhelix (TMHMM)                                                                                                                                                                                                                                                                                                                                                                                                                                                                                       |



|      |                                     |      |                                                          |     |           |        |         |                                                                                                                                                                                                                                                                                                                                                                                                                                                                                                                                                                                                                                                                           |
|------|-------------------------------------|------|----------------------------------------------------------|-----|-----------|--------|---------|---------------------------------------------------------------------------------------------------------------------------------------------------------------------------------------------------------------------------------------------------------------------------------------------------------------------------------------------------------------------------------------------------------------------------------------------------------------------------------------------------------------------------------------------------------------------------------------------------------------------------------------------------------------------------|
| 1790 | 296548_length_1356_cvg_4.1_tip_1_4  | 95   | latrophilin-3 isoform x10                                | 452 | 2.57E-41  | 46.30% | 0.109   | IPR000832 (PRINTS); IPR000203 (SMART); IPR022624 (PFAM); IPR000203 (PFAM); IPR000832 (PFAM); PTHR12011 (PANTHER); TRANSMEMBRANE (PHOBIUS); TRANSMEMBRANE (PHOBIUS); NON_CYTOPLASMIC_DOMAIN (PHOBIUS); CYTOPLASMIC_DOMAIN (PHOBIUS); TRANSMEMBRANE (PHOBIUS); NON_CYTOPLASMIC_DOMAIN (PHOBIUS); CYTOPLASMIC_DOMAIN (PHOBIUS); NON_CYTOPLASMIC_DOMAIN (PHOBIUS); TRANSMEMBRANE (PHOBIUS); IPR000203 (PROSITE_PROFILES); IPR017981 (PROSITE_PROFILES); TMhelix (TMHMM); TMhelix (TMHMM); TMhelix (TMHMM)                                                                                                                                                                     |
| 1791 | 296556_length_1356_cvg_23.1_tip_1_5 | 300  | mam and ldl-receptor class a domain-containing protein 1 | 452 | 5.89E-35  | 46.40% | 0.107   | IPR002172 (PRINTS); IPR002172 (SMART); IPR002172 (G3DSA:4.10.400.GENE3D); IPR000998 (PFAM); IPR002172 (G3DSA:4.10.400.GENE3D); G3DSA:2.10.25.10 (GENE3D); PTHR23282 (PANTHER); PTHR23282:SF67 (PANTHER); IPR023415 (PROSITE_PATTERNS); IPR023415 (PROSITE_PATTERNS); IPR023415 (PROSITE_PATTERNS); IPR013032 (PROSITE_PATTERNS); NON_CYTOPLASMIC_DOMAIN (PHOBIUS); CYTOPLASMIC_DOMAIN (PHOBIUS); TRANSMEMBRANE (PHOBIUS); IPR000742 (PROSITE_PROFILES); IPR002172 (PROSITE_PROFILES); IPR002172 (PROSITE_PROFILES); IPR000998 (PROSITE_PROFILES); IPR002172 (PROSITE_PROFILES); SSF57196 (SUPERFAMILY); IPR002172 (SUPERFAMILY); IPR002172 (SUPERFAMILY); TMhelix (TMHMM) |
| 1792 | 296572_length_1359_cvg_13.3_tip_1_0 | 224  | protein spaetzle                                         | 453 | 7.29E-31  | 53.20% | 0.256   | PTHR23199 (PANTHER); CYTOPLASMIC_DOMAIN (PHOBIUS); NON_CYTOPLASMIC_DOMAIN (PHOBIUS); TRANSMEMBRANE (PHOBIUS); IPR029034 (SUPERFAMILY); TMhelix (TMHMM)                                                                                                                                                                                                                                                                                                                                                                                                                                                                                                                    |
| 1793 | 296590_length_1360_cvg_49.9_tip_1_5 | 3900 | astakine variant 1                                       | 453 | 3.09E-20  | 62.00% | 0.186   | G3DSA:2.10.80.10 (GENE3D); CYTOPLASMIC_DOMAIN (PHOBIUS); NON_CYTOPLASMIC_DOMAIN (PHOBIUS); TRANSMEMBRANE (PHOBIUS); NON_CYTOPLASMIC_DOMAIN (PHOBIUS); TRANSMEMBRANE (PHOBIUS); IPR002890 (PFAM); PTHR11412 (PANTHER); SIGNAL_PEPTIDE (PHOBIUS); NON_CYTOPLASMIC_DOMAIN (PHOBIUS); SIGNAL_PEPTIDE_C_REGION (PHOBIUS); SIGNAL_PEPTIDE_H_REGION (PHOBIUS); SIGNAL_PEPTIDE_N_REGION (PHOBIUS); SignalP-noTM (SIGNALP_EUK)                                                                                                                                                                                                                                                     |
| 1794 | 296592_length_1360_cvg_7.8_tip_1_0  | 115  | alpha-2-macroglobulin-like protein 1 isoform x2          | 454 | 5.32E-119 | 59.20% | 0.649 Y | no IPS match                                                                                                                                                                                                                                                                                                                                                                                                                                                                                                                                                                                                                                                              |
| 1795 | 296596_length_1361_cvg_21.6_tip_1_0 | 393  | f5 8 type c domain protein                               | 454 | 7.57E-31  | 38.40% | 0.148   | IPR008160 (PFAM); PTHR24023 (PANTHER)                                                                                                                                                                                                                                                                                                                                                                                                                                                                                                                                                                                                                                     |
| 1796 | 296596_length_1361_cvg_21.6_tip_1_3 | 393  | collagen alpha-1 chain                                   | 454 | 4.66E-36  | 44.10% | 0.101   | IPR013763 (SMART); IPR013763 (G3DSA:1.10.472.GENE3D); IPR006671 (PFAM); IPR015429 (PANTHER); TRANSMEMBRANE (PHOBIUS); CYTOPLASMIC_DOMAIN (PHOBIUS); NON_CYTOPLASMIC_DOMAIN (PHOBIUS); TRANSMEMBRANE (PHOBIUS); CYTOPLASMIC_DOMAIN (PHOBIUS); TRANSMEMBRANE (PHOBIUS); NON_CYTOPLASMIC_DOMAIN (PHOBIUS); IPR013763 (SUPERFAMILY); IPR013763 (SUPERFAMILY); TMhelix (TMHMM); TMhelix (TMHMM); TMhelix (TMHMM)                                                                                                                                                                                                                                                               |
| 1797 | 296612_length_1361_cvg_6.5_tip_1_4  | 154  | cyclin-c                                                 | 454 | 9.78E-157 | 91.20% | 0.124   | Coil (COILS); IPR001211 (PFAM); IPR016090 (G3DSA:1.20.90.GENE3D); PTHR12253 (PANTHER); IPR016090 (SUPERFAMILY)                                                                                                                                                                                                                                                                                                                                                                                                                                                                                                                                                            |
| 1798 | 296614_length_1362_cvg_59.2_tip_1_5 | 1535 | group 3 secretory phospholipase partial                  | 454 | 1.52E-87  | 55.90% | 0.14    | IPR002401 (PRINTS); IPR001128 (PRINTS); IPR001128 (PFAM); IPR001128 (G3DSA:1.10.630.GENE3D); PTHR24292 (PANTHER); PTHR24292:SF24 (PANTHER); IPR017972 (PROSITE_PATTERNS); NON_CYTOPLASMIC_DOMAIN (PHOBIUS); CYTOPLASMIC_DOMAIN (PHOBIUS); TRANSMEMBRANE (PHOBIUS); IPR001128 (SUPERFAMILY)                                                                                                                                                                                                                                                                                                                                                                                |
| 1799 | 296634_length_1364_cvg_14.3_tip_1_5 | 237  | cytochrome p450 3a4-like                                 | 454 | 3.24E-70  | 59.70% | 0.164   | IPR004104 (PFAM); IPR000683 (PFAM); IPR016040 (G3DSA:3.40.50.GENE3D); G3DSA:3.30.360.10 (GENE3D); PTHR22604:SF92 (PANTHER); PTHR22604 (PANTHER); SSF51735 (SUPERFAMILY); SSF55347 (SUPERFAMILY)                                                                                                                                                                                                                                                                                                                                                                                                                                                                           |
| 1800 | 296638_length_1365_cvg_7.9_tip_1_0  | 148  | uncharacterized oxidoreductase yrbe-like                 | 455 | 3.52E-142 | 68.50% | 0.106   | Coil (COILS); IPR020067 (SMART); IPR020067 (G3DSA:1.10.2000.GENE3D); IPR020067 (PFAM); IPR018933 (PFAM); PTHR11309:SF80 (PANTHER); IPR015526 (PANTHER); TRANSMEMBRANE (PHOBIUS); CYTOPLASMIC_DOMAIN (PHOBIUS); NON_CYTOPLASMIC_DOMAIN (PHOBIUS); IPR020067 (PROSITE_PROFILES); IPR001134 (PROSITE_PROFILES); IPR008993 (SUPERFAMILY); IPR020067 (SUPERFAMILY); TMhelix (TMHMM)                                                                                                                                                                                                                                                                                            |
| 1801 | 296644_length_1365_cvg_6.0_tip_1_0  | 156  | secreted frizzled-related protein 5                      | 455 | 1.27E-117 | 63.80% | 0.294   | IPR020472 (PRINTS); IPR001680 (SMART); IPR001680 (PFAM); IPR015943 (G3DSA:2.130.10.GENE3D); PTHR22844 (PANTHER); PTHR22844:SF166 (PANTHER); IPR019775 (PROSITE_PATTERNS); IPR019775 (PROSITE_PATTERNS); TRANSMEMBRANE (PHOBIUS); CYTOPLASMIC_DOMAIN (PHOBIUS); NON_CYTOPLASMIC_DOMAIN (PHOBIUS); IPR017986 (PROSITE_PROFILES); IPR001680 (PROSITE_PROFILES); IPR001680 (PROSITE_PROFILES); IPR017986 (SUPERFAMILY); TMhelix (TMHMM)                                                                                                                                                                                                                                       |
| 1803 | 296664_length_1367_cvg_15.8_tip_1_2 | 282  | wd repeat-containing protein 86-like                     | 455 | 1.31E-78  | 68.80% | 0.11    |                                                                                                                                                                                                                                                                                                                                                                                                                                                                                                                                                                                                                                                                           |

|      |                                     |     |                                                                        |     |           |        |         |                                                                                                                                                                                                                                                                                                                                                                                                                                                                                                                     |
|------|-------------------------------------|-----|------------------------------------------------------------------------|-----|-----------|--------|---------|---------------------------------------------------------------------------------------------------------------------------------------------------------------------------------------------------------------------------------------------------------------------------------------------------------------------------------------------------------------------------------------------------------------------------------------------------------------------------------------------------------------------|
| 1802 | 296660_length_1366_cvg_30.2_tip_1_3 | 546 | na+ h+ exchange regulatory cofactor nhe-rf2                            | 456 | 1.22E-08  | 68.83% | 0.109   | no IPS match                                                                                                                                                                                                                                                                                                                                                                                                                                                                                                        |
| 1804 | 296690_length_1370_cvg_7.9_tip_1_3  | 144 | dnaj homolog subfamily a member 1                                      | 457 | 0         | 85.90% | 0.156   | IPR001623 (PRINTS); IPR001623 (SMART); IPR001305 (G3DSA:2.10.230.GENE3D); IPR001305 (PFAM); G3DSA:2.60.260.20 (GENE3D); IPR001623 (G3DSA:1.10.287.GENE3D); IPR002939 (PFAM); IPR001623 (PFAM); G3DSA:2.60.260.20 (GENE3D); PTHR24076:SF75 (PANTHER); PTHR24076 (PANTHER); IPR018253 (PROSITE_PATTERNS); IPR012724 (HAMAP); IPR001623 (PROSITE_PROFILES); IPR001305 (PROSITE_PROFILES); IPR001305 (SUPERFAMILY); IPR008971 (SUPERFAMILY); IPR001623 (SUPERFAMILY); IPR008971 (SUPERFAMILY)                           |
| 1805 | 296702_length_1370_cvg_6.9_tip_1_1  | 119 | ---NA---                                                               | 457 |           |        | 0.106   | Coil (COILS); Coil (COILS); Coil (COILS)                                                                                                                                                                                                                                                                                                                                                                                                                                                                            |
| 1806 | 296710_length_1370_cvg_12.6_tip_1_0 | 252 | lethal giant larvae partial                                            | 457 | 0         | 76.70% | 0.219   | IPR000664 (PRINTS); IPR001680 (SMART); IPR015943 (G3DSA:2.130.10.GENE3D); IPR013577 (PFAM); PTHR10241 (PANTHER); PTHR10241:SF28 (PANTHER); IPR019775 (PROSITE_PATTERNS); IPR017986 (PROSITE_PROFILES); IPR017986 (SUPERFAMILY)                                                                                                                                                                                                                                                                                      |
| 1807 | 296716_length_1371_cvg_10.9_tip_1_4 | 159 | matrix metalloproteinase-9-like                                        | 457 | 1.27E-09  | 48.70% | 0.149   | IPR000562 (SMART); IPR000562 (G3DSA:2.10.10.GENE3D); IPR000562 (PFAM); IPR000562 (PROSITE_PROFILES); IPR000562 (PROSITE_PROFILES); IPR013806 (SUPERFAMILY); IPR013806 (SUPERFAMILY)                                                                                                                                                                                                                                                                                                                                 |
| 1808 | 296754_length_1375_cvg_30.1_tip_1_0 | 547 | regulatory particle triple-a atpase isoform a                          | 459 | 0         | 97.00% | 0.105   | IPR003593 (SMART); IPR005937 (TIGRFAM); IPR027417 (G3DSA:3.40.50.GENE3D); G3DSA:1.10.8.60 (GENE3D); IPR003959 (PFAM); PTHR23073 (PANTHER); PTHR23073:SF9 (PANTHER); IPR003960 (PROSITE_PATTERNS); IPR027417 (SUPERFAMILY)                                                                                                                                                                                                                                                                                           |
| 1809 | 296760_length_1375_cvg_5.5_tip_1_0  | 127 | insulin-like growth factor-binding protein complex acid labile subunit | 459 | 1.40E-65  | 55.90% | 0.372 Y | SM00365 (SMART); IPR003591 (SMART); G3DSA:3.80.10.10 (GENE3D); IPR001611 (PFAM); PTHR24365 (PANTHER); SIGNAL_PEPTIDE (PHOBIUS); SIGNAL_PEPTIDE_N_REGION (PHOBIUS); NON_CYTOPLASMIC_DOMAIN (PHOBIUS); SIGNAL_PEPTIDE_H_REGION (PHOBIUS); SIGNAL_PEPTIDE_C_REGION (PHOBIUS); IPR001611 (PROSITE_PROFILES); SSF52058 (SUPERFAMILY) |
| 1810 | 296834_length_1384_cvg_45.5_tip_1_5 | 976 | hypothetical protein DAPPUDRAFT_308200                                 | 461 | 8.66E-35  | 49.70% | 0.121   | IPR010562 (SMART); IPR010562 (PFAM); PTHR11008:SF9 (PANTHER); PTHR11008 (PANTHER); IPR020234 (PRODOM)                                                                                                                                                                                                                                                                                                                                                                                                               |
| 1811 | 296848_length_1385_cvg_16.4_tip_1_4 | 297 | protein tumorous imaginal mitochondrial-like isoform x2                | 462 | 0         | 79.80% | 0.269   | IPR001623 (PRINTS); IPR001623 (SMART); IPR001305 (G3DSA:2.10.230.GENE3D); IPR001623 (G3DSA:1.10.287.GENE3D); G3DSA:2.60.260.20 (GENE3D); IPR001623 (PFAM); IPR002939 (PFAM); IPR001305 (PFAM); PTHR24076:SF79 (PANTHER); PTHR24076 (PANTHER); IPR018253 (PROSITE_PATTERNS); IPR012724 (HAMAP); IPR001305 (PROSITE_PROFILES); IPR001623 (PROSITE_PROFILES); IPR001305 (SUPERFAMILY); IPR001623 (SUPERFAMILY); IPR008971 (SUPERFAMILY); IPR008971 (SUPERFAMILY)                                                       |
| 1812 | 296912_length_1391_cvg_8.6_tip_1_4  | 170 | carboxypeptidase n subunit 2                                           | 464 | 2.62E-18  | 41.80% | 0.286   | IPR001611 (PFAM); G3DSA:3.80.10.10 (GENE3D); IPR001611 (PFAM); PTHR24365 (PANTHER); NON_CYTOPLASMIC_DOMAIN (PHOBIUS); TRANSMEMBRANE (PHOBIUS); CYTOPLASMIC_DOMAIN (PHOBIUS); IPR001611 (PROSITE_PROFILES); IPR001611 (PROSITE_PROFILES); IPR001611 (PROSITE_PROFILES); IPR001611 (PROSITE_PROFILES); IPR001611 (PROSITE_PROFILES); IPR001611 (PROSITE_PROFILES); SSF52058 (SUPERFAMILY); TMhelix (TMHMM)                                                                                                            |
| 1814 | 296940_length_1394_cvg_7.8_tip_1_2  | 162 | thromboxane a synthase-like protein                                    | 464 | 1.08E-112 | 58.60% | 0.271   | IPR002401 (PRINTS); IPR001128 (G3DSA:1.10.630.GENE3D); IPR001128 (PFAM); PTHR24292:SF24 (PANTHER); PTHR24292 (PANTHER); NON_CYTOPLASMIC_DOMAIN (PHOBIUS); TRANSMEMBRANE (PHOBIUS); CYTOPLASMIC_DOMAIN (PHOBIUS); NON_CYTOPLASMIC_DOMAIN (PHOBIUS); TRANSMEMBRANE (PHOBIUS); TRANSMEMBRANE (PHOBIUS); CYTOPLASMIC_DOMAIN (PHOBIUS); IPR001128 (SUPERFAMILY); TMhelix (TMHMM)                                                                                                                                         |
| 1813 | 296928_length_1393_cvg_26.2_tip_1_3 | 397 | laccase-5- partial                                                     | 465 | 1.68E-131 | 63.80% | 0.253   | IPR008972 (G3DSA:2.60.40.GENE3D); IPR011707 (PFAM); IPR008972 (G3DSA:2.60.40.GENE3D); IPR001117 (PFAM); PTHR11709 (PANTHER); PTHR11709:SF33 (PANTHER); NON_CYTOPLASMIC_DOMAIN (PHOBIUS); CYTOPLASMIC_DOMAIN (PHOBIUS); TRANSMEMBRANE (PHOBIUS); SignalP-TM (SIGNALP_GRAM_POSITIVE); IPR008972 (SUPERFAMILY); IPR008972 (SUPERFAMILY); TMhelix (TMHMM)                                                                                                                                                               |



|      |                                     |       |                                                           |     |           |        |         |                                                                                                                                                                                                                                                                                                                                                                                                                                                                                                                                                                                  |
|------|-------------------------------------|-------|-----------------------------------------------------------|-----|-----------|--------|---------|----------------------------------------------------------------------------------------------------------------------------------------------------------------------------------------------------------------------------------------------------------------------------------------------------------------------------------------------------------------------------------------------------------------------------------------------------------------------------------------------------------------------------------------------------------------------------------|
| 1823 | 297086_length_1412_cvg_3.1_tip_1_5  | 79    | protein turtle                                            | 470 | 5.56E-69  | 49.90% | 0.104   | IPR003598 (SMART); IPR003599 (SMART); IPR003961 (SMART); IPR013783 (G3DSA:2.60.40.GENE3D); PF13895 (PFAM); IPR013783 (G3DSA:2.60.40.GENE3D); IPR003961 (PFAM); IPR013783 (G3DSA:2.60.40.GENE3D); IPR013098 (PFAM); IPR013783 (G3DSA:2.60.40.GENE3D); PTHR10489 (PANTHER); PTHR10489:SF510 (PANTHER); CYTOPLASMIC_DOMAIN (PHOBIUS); TRANSMEMBRANE (PHOBIUS); NON_CYTOPLASMIC_DOMAIN (PHOBIUS); IPR007110 (PROSITE_PROFILES); IPR007110 (PROSITE_PROFILES); IPR003961 (PROSITE_PROFILES); SSF48726 (SUPERFAMILY); SSF48726 (SUPERFAMILY); IPR003961 (SUPERFAMILY); TMhelix (TMHMM) |
| 1824 | 297104_length_1414_cvg_14.4_tip_1_4 | 235   | acyl- delta desaturase                                    | 471 | 1.40E-129 | 71.50% | 0.341 Y | IPR015876 (PRINTS); IPR005804 (PFAM); PTHR11351:SF28 (PANTHER); PTHR11351 (PANTHER); CYTOPLASMIC_DOMAIN (PHOBIUS); CYTOPLASMIC_DOMAIN (PHOBIUS); TRANSMEMBRANE (PHOBIUS); TRANSMEMBRANE (PHOBIUS); TRANSMEMBRANE (PHOBIUS); NON_CYTOPLASMIC_DOMAIN (PHOBIUS); TRANSMEMBRANE (PHOBIUS); CYTOPLASMIC_DOMAIN (PHOBIUS); NON_CYTOPLASMIC_DOMAIN (PHOBIUS); TMhelix (TMHMM); TMhelix (TMHMM); TMhelix (TMHMM); TMhelix (TMHMM)                                                                                                                                                        |
| 1825 | 297114_length_1414_cvg_7.0_tip_1_2  | 121   | sparc-related modular calcium-binding protein 2           | 471 | 4.10E-67  | 66.00% | 0.101   | IPR000716 (SMART); IPR000716 (PFAM); IPR000716 (G3DSA:4.10.800.GENE3D); IPR011992 (G3DSA:1.10.238.GENE3D); IPR019577 (PFAM); PTHR12352:SF3 (PANTHER); PTHR12352 (PANTHER); IPR000716 (PROSITE_PATTERNS); IPR018247 (PROSITE_PATTERNS); TRANSMEMBRANE (PHOBIUS); CYTOPLASMIC_DOMAIN (PHOBIUS); NON_CYTOPLASMIC_DOMAIN (PHOBIUS); NON_CYTOPLASMIC_DOMAIN (PHOBIUS); TRANSMEMBRANE (PHOBIUS); IPR000716 (PROSITE_PROFILES); SSF47473 (SUPERFAMILY); IPR000716 (SUPERFAMILY)                                                                                                         |
| 1827 | 297122_length_1415_cvg_8.2_tip_1_5  | 132   | casein kinase ii subunit alpha                            | 471 | 0         | 94.30% | 0.254   | IPR002290 (SMART); IPR000719 (PFAM); G3DSA:1.10.510.10 (GENE3D); G3DSA:3.30.200.20 (GENE3D); PTHR24054 (PANTHER); PTHR24054:SF28 (PANTHER); IPR008271 (PROSITE_PATTERNS); IPR017441 (PROSITE_PATTERNS); TRANSMEMBRANE (PHOBIUS); CYTOPLASMIC_DOMAIN (PHOBIUS); NON_CYTOPLASMIC_DOMAIN (PHOBIUS); IPR000719 (PROSITE_PROFILES); IPR011009 (SUPERFAMILY); TMhelix (TMHMM)                                                                                                                                                                                                          |
| 1826 | 297118_length_1415_cvg_16.3_tip_1_4 | 271   | #NAME?                                                    | 472 | 1.06E-138 | 78.30% | 0.139   | IPR002347 (PRINTS); PF13561 (PFAM); IPR016040 (G3DSA:3.40.50.GENE3D); PTHR24315:SF2 (PANTHER); PTHR24315 (PANTHER); SSF51735 (SUPERFAMILY)                                                                                                                                                                                                                                                                                                                                                                                                                                       |
| 1828 | 297132_length_1416_cvg_5.0_tip_1_1  | 90    | protein sda1 homolog isoform x2                           | 472 | 3.35E-165 | 72.50% | 0.154   | IPR007949 (PFAM); IPR027312 (PTHR12730:PANTHER); PTHR12730 (PANTHER); SIGNAL_PEPTIDE_N_REGION (PHOBIUS); SIGNAL_PEPTIDE_H_REGION (PHOBIUS); NON_CYTOPLASMIC_DOMAIN (PHOBIUS); SIGNAL_PEPTIDE_C_REGION (PHOBIUS); SIGNAL_PEPTIDE (PHOBIUS); IPR016024 (SUPERFAMILY)                                                                                                                                                                                                                                                                                                               |
| 1829 | 297186_length_1422_cvg_72.4_tip_1_0 | 59683 | cathepsin partial                                         | 474 | 2.58E-144 | 75.70% | 0.108   | IPR000668 (PRINTS); IPR000668 (SMART); IPR013201 (SMART); G3DSA:3.90.70.10 (GENE3D); IPR013201 (PFAM); IPR000668 (PFAM); IPR013128 (PANTHER); PTHR12411:SF57 (PANTHER); IPR025661 (PROSITE_PATTERNS); IPR025660 (PROSITE_PATTERNS); IPR000169 (PROSITE_PATTERNS); SSF54001 (SUPERFAMILY)                                                                                                                                                                                                                                                                                         |
| 1830 | 297194_length_1422_cvg_15.8_tip_1_1 | 244   | hydroxyacyl dehydrogenase                                 | 474 | 4.04E-128 | 83.50% | 0.251   | IPR002198 (PRINTS); IPR002347 (PRINTS); IPR002198 (PFAM); IPR016040 (G3DSA:3.40.50.GENE3D); PTHR24316 (PANTHER); PTHR24316:SF251 (PANTHER); IPR020904 (PROSITE_PATTERNS); SIGNAL_PEPTIDE_C_REGION (PHOBIUS); SIGNAL_PEPTIDE_N_REGION (PHOBIUS); NON_CYTOPLASMIC_DOMAIN (PHOBIUS); SIGNAL_PEPTIDE_H_REGION (PHOBIUS); SIGNAL_PEPTIDE (PHOBIUS); SSF51735 (SUPERFAMILY)                                                                                                                                                                                                            |
| 1831 | 297200_length_1423_cvg_12.7_tip_1_5 | 203   | er degradation-enhancing alpha-mannosidase-like protein 2 | 474 | 3.39E-83  | 74.00% | 0.106   | IPR001382 (PRINTS); IPR001382 (PFAM); IPR001382 (G3DSA:1.50.10.GENE3D); IPR001382 (PANTHER); PTHR11742:SF37 (PANTHER); IPR001382 (SUPERFAMILY)                                                                                                                                                                                                                                                                                                                                                                                                                                   |
| 1832 | 297202_length_1423_cvg_7.0_tip_1_3  | 125   | vitellogenin fused with superoxide dismutase              | 475 | 1.69E-30  | 48.90% | 0.109   | IPR001846 (SMART); IPR001846 (PFAM); PTHR23345 (PANTHER); PTHR23345:SF1 (PANTHER); IPR001846 (PROSITE_PROFILES)                                                                                                                                                                                                                                                                                                                                                                                                                                                                  |
| 1833 | 297210_length_1425_cvg_7.2_tip_1_5  | 140   | serpin 3                                                  | 475 | 1.32E-105 | 64.90% | 0.835 Y | IPR023796 (SMART); IPR023796 (PFAM); G3DSA:2.30.39.10 (GENE3D); G3DSA:3.30.497.10 (GENE3D); IPR000215 (PANTHER); IPR023795 (PROSITE_PATTERNS); SignalP-noTM (SIGNALP_EUK); IPR023796 (SUPERFAMILY)                                                                                                                                                                                                                                                                                                                                                                               |

|      |                                     |      |                                                        |     |           |        |         |                                                                                                                                                                                                                                                                                                                                                                                                                                                                                                                                                                                                                                                                                        |
|------|-------------------------------------|------|--------------------------------------------------------|-----|-----------|--------|---------|----------------------------------------------------------------------------------------------------------------------------------------------------------------------------------------------------------------------------------------------------------------------------------------------------------------------------------------------------------------------------------------------------------------------------------------------------------------------------------------------------------------------------------------------------------------------------------------------------------------------------------------------------------------------------------------|
| 1834 | 297222_length_1427_cvg_22.4_tip_1_3 | 470  | prophenoloxidase activating factor                     | 476 | 2.49E-133 | 65.90% | 0.177   | IPR001314 (PRINTS); IPR001254 (SMART); G3DSA:2.40.10.10 (GENE3D); G3DSA:2.40.10.10 (GENE3D); G3DSA:2.40.10.10 (GENE3D); IPR001254 (PFAM); PTHR24268:SF95 (PANTHER); PTHR24268 (PANTHER); IPR018114 (PROSITE_PATTERNS); CYTOPLASMIC_DOMAIN (PHOBIUS); TRANSMEMBRANE (PHOBIUS); NON_CYTOPLASMIC_DOMAIN (PHOBIUS); IPR001254 (PROSITE_PROFILES); IPR009003 (SUPERFAMILY); TMhelix (TMHMM)                                                                                                                                                                                                                                                                                                 |
| 1835 | 297234_length_1429_cvg_5.5_tip_1_4  | 118  | peroxisomal sarcosine oxidase-like                     | 476 | 7.15E-103 | 60.40% | 0.244   | G3DSA:3.30.9.10 (GENE3D); IPR006076 (PFAM); G3DSA:3.50.50.60 (GENE3D); PTHR10961:SF7 (PANTHER); PTHR10961 (PANTHER); SSF51905 (SUPERFAMILY); SSF54373 (SUPERFAMILY)                                                                                                                                                                                                                                                                                                                                                                                                                                                                                                                    |
| 1837 | 297274_length_1435_cvg_33.5_tip_1_2 | 678  | serine threonine-protein phosphatase alpha-2 isoform   | 478 | 0         | 97.40% | 0.163   | IPR006186 (PRINTS); IPR006186 (SMART); IPR029052 (G3DSA:3.60.21.GENE3D); IPR004843 (PFAM); PTHR11668:SF213 (PANTHER); PTHR11668 (PANTHER); IPR006186 (PROSITE_PATTERNS); IPR029052 (SUPERFAMILY)                                                                                                                                                                                                                                                                                                                                                                                                                                                                                       |
| 1836 | 297272_length_1435_cvg_43.4_tip_1_3 | 1011 | lipase 3                                               | 479 | 4.42E-141 | 67.70% | 0.343 Y | IPR000073 (PFAM); IPR029058 (G3DSA:3.40.50.GENE3D); IPR006693 (PFAM); PTHR11005 (PANTHER); PTHR11005:SF6 (PANTHER); IPR029058 (SUPERFAMILY)                                                                                                                                                                                                                                                                                                                                                                                                                                                                                                                                            |
| 1838 | 297308_length_1440_cvg_10.0_tip_1_0 | 186  | ves g 5 allergen                                       | 480 | 4.61E-44  | 53.20% | 0.188   | IPR002172 (PRINTS); IPR014044 (SMART); IPR002172 (SMART); IPR002172 (PFAM); IPR002172 (G3DSA:4.10.400.GENE3D); IPR014044 (PFAM); IPR002172 (G3DSA:4.10.400.GENE3D); IPR014044 (G3DSA:3.40.33.GENE3D); IPR001283 (PANTHER); IPR023415 (PROSITE_PATTERNS); IPR023415 (PROSITE_PATTERNS); IPR023415 (PROSITE_PATTERNS); TRANSMEMBRANE (PHOBIUS); TRANSMEMBRANE (PHOBIUS); NON_CYTOPLASMIC_DOMAIN (PHOBIUS); NON_CYTOPLASMIC_DOMAIN (PHOBIUS); CYTOPLASMIC_DOMAIN (PHOBIUS); IPR002172 (PROSITE_PROFILES); IPR002172 (PROSITE_PROFILES); IPR002172 (PROSITE_PROFILES); IPR002172 (SUPERFAMILY); IPR014044 (SUPERFAMILY); IPR002172 (SUPERFAMILY); IPR002172 (SUPERFAMILY); TMhelix (TMHMM) |
| 1839 | 297312_length_1440_cvg_59.0_tip_1_1 | 1601 | von willebrand factor like 1                           | 480 | 3.79E-19  | 41.60% | 0.107   | IPR001007 (PFAM); IPR001007 (PROSITE_PATTERNS); IPR001007 (PROSITE_PROFILES); IPR006207 (PROSITE_PROFILES); SSF57603 (SUPERFAMILY)                                                                                                                                                                                                                                                                                                                                                                                                                                                                                                                                                     |
| 1840 | 297326_length_1442_cvg_17.0_tip_1_1 | 330  | apolipoprotein d                                       | 481 | 9.62E-08  | 45.60% | 0.135   | IPR012674 (G3DSA:2.40.128.GENE3D); CYTOPLASMIC_DOMAIN (PHOBIUS); TRANSMEMBRANE (PHOBIUS); NON_CYTOPLASMIC_DOMAIN (PHOBIUS); IPR011038 (SUPERFAMILY)                                                                                                                                                                                                                                                                                                                                                                                                                                                                                                                                    |
| 1841 | 297348_length_1443_cvg_17.4_tip_1_0 | 279  | 26s protease regulatory subunit 7                      | 481 | 0         | 95.90% | 0.186   | IPR003593 (SMART); IPR005937 (TIGRFAM); G3DSA:1.10.8.60 (GENE3D); IPR027417 (G3DSA:3.40.50.GENE3D); IPR003959 (PFAM); PTHR23073 (PANTHER); PTHR23073:SF13 (PANTHER); IPR003960 (PROSITE_PATTERNS); CYTOPLASMIC_DOMAIN (PHOBIUS); NON_CYTOPLASMIC_DOMAIN (PHOBIUS); TRANSMEMBRANE (PHOBIUS); IPR027417 (SUPERFAMILY); TMhelix (TMHMM)                                                                                                                                                                                                                                                                                                                                                   |
| 1842 | 297358_length_1444_cvg_7.6_tip_1_2  | 130  | tyrosine-protein phosphatase lar                       | 481 | 0         | 82.20% | 0.124   | IPR003961 (SMART); IPR029021 (G3DSA:3.90.190.GENE3D); IPR003961 (PFAM); IPR013783 (G3DSA:2.60.40.GENE3D); IPR013783 (G3DSA:2.60.40.GENE3D); PTHR19134:SF199 (PANTHER); PTHR19134 (PANTHER); NON_CYTOPLASMIC_DOMAIN (PHOBIUS); TRANSMEMBRANE (PHOBIUS); CYTOPLASMIC_DOMAIN (PHOBIUS); IPR003961 (PROSITE_PROFILES); IPR003961 (PROSITE_PROFILES); IPR003961 (SUPERFAMILY); IPR003961 (SUPERFAMILY); TMhelix (TMHMM)                                                                                                                                                                                                                                                                     |
| 1843 | 297368_length_1446_cvg_58.0_tip_1_4 | 1956 | aminoacylase-1 isoform x1                              | 482 | 1.77E-154 | 69.10% | 0.264   | IPR002933 (PFAM); IPR011650 (PFAM); IPR010159 (PIRSF); G3DSA:3.40.630.10 (GENE3D); IPR010159 (TIGRFAM); IPR011650 (G3DSA:3.30.70.GENE3D); PTHR11014 (PANTHER); PTHR11014:SF8 (PANTHER); IPR001261 (PROSITE_PATTERNS); IPR001261 (PROSITE_PATTERNS); NON_CYTOPLASMIC_DOMAIN (PHOBIUS); TRANSMEMBRANE (PHOBIUS); CYTOPLASMIC_DOMAIN (PHOBIUS); SSF53187 (SUPERFAMILY); IPR011650 (SUPERFAMILY)                                                                                                                                                                                                                                                                                           |
| 1844 | 297380_length_1447_cvg_6.2_tip_1_1  | 142  | ankyrin repeat and kh domain-containing protein 1-like | 482 | 5.86E-40  | 51.20% | 0.112   | Coil (COILS); IPR002110 (SMART); IPR020683 (G3DSA:1.25.40.GENE3D); IPR020683 (PFAM); PTHR23206 (PANTHER); IPR002110 (PROSITE_PROFILES); IPR020683 (PROSITE_PROFILES); IPR020683 (SUPERFAMILY)                                                                                                                                                                                                                                                                                                                                                                                                                                                                                          |
| 1845 | 297392_length_1448_cvg_17.4_tip_1_3 | 340  | venom carboxylesterase-6                               | 483 | 2.26E-92  | 58.40% | 0.212   | IPR029058 (G3DSA:3.40.50.GENE3D); IPR002018 (PFAM); PTHR11559 (PANTHER); IPR019826 (PROSITE_PATTERNS); TRANSMEMBRANE (PHOBIUS); CYTOPLASMIC_DOMAIN (PHOBIUS); NON_CYTOPLASMIC_DOMAIN (PHOBIUS); IPR029058 (SUPERFAMILY)                                                                                                                                                                                                                                                                                                                                                                                                                                                                |



|      |                                     |        |                                                      |     |           |        |         |                                                                                                                                                                                                                                                                                                                                                                                                                                                                                                                     |
|------|-------------------------------------|--------|------------------------------------------------------|-----|-----------|--------|---------|---------------------------------------------------------------------------------------------------------------------------------------------------------------------------------------------------------------------------------------------------------------------------------------------------------------------------------------------------------------------------------------------------------------------------------------------------------------------------------------------------------------------|
| 1846 | 297434_length_1453_cvg_60.9_tip_1_2 | 2756   | lipase 3                                             | 484 | 8.35E-142 | 67.30% | 0.171   | IPR006693 (PFAM); IPR029058 (G3DSA:3.40.50.GENE3D); IPR000073 (PFAM); PTHR11005 (PANTHER); PTHR11005:SF6 (PANTHER); NON_CYTOPLASMIC_DOMAIN (PHOBIUS); CYTOPLASMIC_DOMAIN (PHOBIUS); TRANSMEMBRANE (PHOBIUS); IPR029058 (SUPERFAMILY); TMhelix (TMHMM)                                                                                                                                                                                                                                                               |
| 1847 | 297456_length_1454_cvg_24.3_tip_1_3 | 302    | adiponectin receptor protein                         | 485 | 3.15E-151 | 70.70% | 0.156   | IPR004254 (PFAM); PTHR20855:SF15 (PANTHER); IPR004254 (PANTHER); NON_CYTOPLASMIC_DOMAIN (PHOBIUS); NON_CYTOPLASMIC_DOMAIN (PHOBIUS); TRANSMEMBRANE (PHOBIUS); TRANSMEMBRANE (PHOBIUS); TRANSMEMBRANE (PHOBIUS); NON_CYTOPLASMIC_DOMAIN (PHOBIUS); CYTOPLASMIC_DOMAIN (PHOBIUS); CYTOPLASMIC_DOMAIN (PHOBIUS); TRANSMEMBRANE (PHOBIUS); TRANSMEMBRANE (PHOBIUS); NON_CYTOPLASMIC_DOMAIN (PHOBIUS); CYTOPLASMIC_DOMAIN (PHOBIUS); TMhelix (TMHMM); TMhelix (TMHMM); TMhelix (TMHMM); TMhelix (TMHMM); TMhelix (TMHMM) |
| 1848 | 297474_length_1456_cvg_82.0_tip_1_2 | 4246   | ferritin 2 light chain homologue                     | 485 | 1.33E-34  | 53.70% | 0.843 Y | IPR012347 (G3DSA:1.20.1260.GENE3D); IPR008331 (PFAM); IPR001519 (PANTHER); PTHR11431:SF28 (PANTHER); NON_CYTOPLASMIC_DOMAIN (PHOBIUS); SIGNAL_PEPTIDE_N_REGION (PHOBIUS); SIGNAL_PEPTIDE (PHOBIUS); SIGNAL_PEPTIDE_C_REGION (PHOBIUS); SIGNAL_PEPTIDE_H_REGION (PHOBIUS); IPR009040 (PROSITE_PROFILES); SignalP-noTM (SIGNALP_EUK); SignalP-noTM (SIGNALP_GRAM_NEGATIVE); SignalP-TM (SIGNALP_GRAM_POSITIVE); IPR009078 (SUPERFAMILY)                                                                               |
| 1849 | 297562_length_1469_cvg_34.0_tip_1_3 | 4421   | universal minicircle sequence binding protein        | 490 | 2.94E-27  | 53.00% | 0.113   | Coil (COILS); Coil (COILS); IPR001878 (SMART); IPR001878 (G3DSA:4.10.60.GENE3D); IPR001878 (G3DSA:4.10.60.GENE3D); IPR001878 (PFAM); PTHR23002 (PANTHER); NON_CYTOPLASMIC_DOMAIN (PHOBIUS); CYTOPLASMIC_DOMAIN (PHOBIUS); TRANSMEMBRANE (PHOBIUS); IPR001878 (PROSITE_PROFILES); IPR001878 (PROSITE_PROFILES); IPR001878 (PROSITE_PROFILES); IPR001878 (PROSITE_PROFILES); IPR001878 (PROSITE_PROFILES); IPR001878 (SUPERFAMILY); IPR001878 (SUPERFAMILY); IPR001878 (SUPERFAMILY); IPR001878 (SUPERFAMILY)         |
| 1850 | 297580_length_1471_cvg_28.1_tip_1_1 | 770    | perlucin-like protein                                | 490 | 2.47E-19  | 53.70% | 0.864 Y | Coil (COILS); IPR001304 (SMART); IPR001304 (PFAM); IPR016186 (G3DSA:3.10.100.GENE3D); PTHR22802 (PANTHER); IPR018378 (PROSITE_PATTERNS); NON_CYTOPLASMIC_DOMAIN (PHOBIUS); TRANSMEMBRANE (PHOBIUS); TRANSMEMBRANE (PHOBIUS); NON_CYTOPLASMIC_DOMAIN (PHOBIUS); CYTOPLASMIC_DOMAIN (PHOBIUS); IPR001304 (PROSITE_PROFILES); SignalP-noTM (SIGNALP_EUK); IPR016187 (SUPERFAMILY); TMhelix (TMHMM)                                                                                                                     |
| 1851 | 297622_length_1475_cvg_8.5_tip_1_4  | 179    | 12 kda fk506-binding protein                         | 492 | 1.23E-61  | 90.10% | 0.166   | IPR001179 (PFAM); G3DSA:3.10.50.40 (GENE3D); PTHR10516:SF272 (PANTHER); IPR023566 (PANTHER); CYTOPLASMIC_DOMAIN (PHOBIUS); TRANSMEMBRANE (PHOBIUS); NON_CYTOPLASMIC_DOMAIN (PHOBIUS); TRANSMEMBRANE (PHOBIUS); CYTOPLASMIC_DOMAIN (PHOBIUS); IPR001179 (PROSITE_PROFILES); SSF54534 (SUPERFAMILY)                                                                                                                                                                                                                   |
| 1874 | 297934_length_1523_cvg_56.4_tip_1_1 | 279613 | hemocyanin subunit type 2 precursor                  | 492 | 0         | 74.50% | 0.101   | IPR005203 (G3DSA:2.60.40.GENE3D); IPR005203 (PFAM); IPR000896 (PFAM); IPR008922 (G3DSA:1.10.1280.GENE3D); IPR013788 (PANTHER); IPR002227 (PROSITE_PATTERNS); IPR013788 (PROSITE_PATTERNS); CYTOPLASMIC_DOMAIN (PHOBIUS); TRANSMEMBRANE (PHOBIUS); NON_CYTOPLASMIC_DOMAIN (PHOBIUS); IPR008922 (SUPERFAMILY); IPR014756 (SUPERFAMILY)                                                                                                                                                                                |
| 1852 | 297638_length_1478_cvg_3.0_tip_1_3  | 67     | endoplasmic reticulum resident protein 44 isoform x3 | 493 | 0         | 79.10% | 0.252   | IPR012336 (G3DSA:3.40.30.GENE3D); IPR013766 (PFAM); IPR012336 (G3DSA:3.40.30.GENE3D); PF13848 (PFAM); PTHR18929 (PANTHER); PTHR18929:SF49 (PANTHER); IPR012336 (PROSITE_PROFILES); IPR012336 (SUPERFAMILY); IPR012336 (SUPERFAMILY); IPR012336 (SUPERFAMILY)                                                                                                                                                                                                                                                        |
| 1853 | 297648_length_1478_cvg_8.6_tip_1_4  | 161    | lysosomal alpha-mannosidase                          | 493 | 5.13E-156 | 65.70% | 0.147   | IPR015341 (SMART); G3DSA:1.10.287.530 (GENE3D); IPR015341 (PFAM); IPR011682 (PFAM); IPR013780 (G3DSA:2.60.40.GENE3D); G3DSA:2.70.98.30 (GENE3D); PTHR11607 (PANTHER); PTHR11607:SF3 (PANTHER); IPR011013 (SUPERFAMILY); IPR028995 (SUPERFAMILY)                                                                                                                                                                                                                                                                     |
| 1854 | 297650_length_1479_cvg_37.3_tip_1_3 | 736    | aminoacylase-1                                       | 493 | 0         | 75.60% | 0.101   | G3DSA:3.40.630.10 (GENE3D); IPR011650 (G3DSA:3.30.70.GENE3D); IPR002933 (PFAM); IPR011650 (PFAM); IPR010159 (PIRSF); IPR010159 (TIGRFAM); PTHR11014:SF8 (PANTHER); PTHR11014 (PANTHER); IPR001261 (PROSITE_PATTERNS); IPR001261 (PROSITE_PATTERNS); CYTOPLASMIC_DOMAIN (PHOBIUS); TRANSMEMBRANE (PHOBIUS); NON_CYTOPLASMIC_DOMAIN (PHOBIUS); NON_CYTOPLASMIC_DOMAIN (PHOBIUS); TRANSMEMBRANE (PHOBIUS); IPR011650 (SUPERFAMILY); SSF53187 (SUPERFAMILY); TMhelix (TMHMM); TMhelix (TMHMM)                           |



|      |                                     |      |                                                    |     |           |        |         |                                                                                                                                                                                                                                                                                                                                                                                                                                                                                                                                                                                                                                                                                                                       |
|------|-------------------------------------|------|----------------------------------------------------|-----|-----------|--------|---------|-----------------------------------------------------------------------------------------------------------------------------------------------------------------------------------------------------------------------------------------------------------------------------------------------------------------------------------------------------------------------------------------------------------------------------------------------------------------------------------------------------------------------------------------------------------------------------------------------------------------------------------------------------------------------------------------------------------------------|
| 1862 | 297756_length_1494_cvg_5.8_tip_1_4  | 105  | sulfhydryl oxidase 2-like                          | 498 | 5.70E-80  | 54.20% | 0.108   | IPR017905 (PFAM); IPR017905 (G3DSA:1.20.120.GENE3D); PTHR22897:SF8 (PANTHER); PTHR22897 (PANTHER); NON_CYTOPLASMIC_DOMAIN (PHOBIUS); CYTOPLASMIC_DOMAIN (PHOBIUS); TRANSMEMBRANE (PHOBIUS); IPR017905 (PROSITE_PROFILES); IPR017905 (SUPERFAMILY); TMhelix (TMHMM)                                                                                                                                                                                                                                                                                                                                                                                                                                                    |
| 1863 | 297760_length_1496_cvg_5.7_tip_1_2  | 117  | low-density lipoprotein receptor-related protein 2 | 498 | 8.47E-32  | 49.50% | 0.108   | IPR002172 (PRINTS); IPR002172 (SMART); IPR002172 (G3DSA:4.10.400.GENE3D); IPR002172 (PFAM); IPR002172 (G3DSA:4.10.400.GENE3D); IPR002172 (G3DSA:4.10.400.GENE3D); PTHR10529 (PANTHER); IPR023415 (PROSITE_PATTERNS); IPR023415 (PROSITE_PATTERNS); IPR023415 (PROSITE_PATTERNS); IPR002172 (PROSITE_PROFILES); IPR002172 (PROSITE_PROFILES); IPR002172 (PROSITE_PROFILES); IPR002172 (PROSITE_PROFILES); IPR002172 (PROSITE_PROFILES); IPR002172 (PROSITE_PROFILES); SignalP-TM (SIGNALP_GRAM_POSITIVE); IPR002172 (SUPERFAMILY); IPR002172 (SUPERFAMILY); IPR002172 (SUPERFAMILY)                                                                                                                                    |
| 1864 | 297776_length_1498_cvg_55.8_tip_1_0 | 1417 | fk506-binding protein 2 isoform x2                 | 500 | 2.48E-99  | 79.00% | 0.234   | IPR011992 (PFAM); IPR011992 (G3DSA:1.10.238.GENE3D); G3DSA:3.10.50.40 (GENE3D); IPR001179 (PFAM); IPR023566 (PANTHER); PTHR10516:SF252 (PANTHER); IPR018247 (PROSITE_PATTERNS); IPR018247 (PROSITE_PATTERNS); SIGNAL_PEPTIDE_N_REGION (PHOBIUS); CYTOPLASMIC_DOMAIN (PHOBIUS); TRANSMEMBRANE (PHOBIUS); CYTOPLASMIC_DOMAIN (PHOBIUS); NON_CYTOPLASMIC_DOMAIN (PHOBIUS); NON_CYTOPLASMIC_DOMAIN (PHOBIUS); SIGNAL_PEPTIDE_C_REGION (PHOBIUS); SIGNAL_PEPTIDE_H_REGION (PHOBIUS); TRANSMEMBRANE (PHOBIUS); SIGNAL_PEPTIDE (PHOBIUS); TRANSMEMBRANE (PHOBIUS); IPR002048 (PROSITE_PROFILES); IPR001179 (PROSITE_PROFILES); IPR002048 (PROSITE_PROFILES); SSF47473 (SUPERFAMILY); SSF54534 (SUPERFAMILY); TMhelix (TMHMM) |
| 1889 | 298156_length_1550_cvg_13.0_tip_1_3 | 264  | lissencephaly-1 homolog isoform x1                 | 500 | 0         | 91.90% | 0.206   | IPR020472 (PRINTS); IPR001680 (SMART); IPR015943 (G3DSA:2.130.10.GENE3D); IPR001680 (PFAM); PTHR22847 (PANTHER); IPR019775 (PROSITE_PATTERNS); IPR019775 (PROSITE_PATTERNS); IPR019775 (PROSITE_PATTERNS); IPR019775 (PROSITE_PATTERNS); IPR019775 (PROSITE_PATTERNS); IPR019775 (PROSITE_PATTERNS); TRANSMEMBRANE (PHOBIUS); CYTOPLASMIC_DOMAIN (PHOBIUS); NON_CYTOPLASMIC_DOMAIN (PHOBIUS); TRANSMEMBRANE (PHOBIUS); NON_CYTOPLASMIC_DOMAIN (PHOBIUS); IPR001680 (PROSITE_PROFILES); IPR001680 (PROSITE_PROFILES); IPR017986 (PROSITE_PROFILES); IPR001680 (PROSITE_PROFILES); IPR001680 (PROSITE_PROFILES); IPR001680 (PROSITE_PROFILES); IPR001680 (PROSITE_PROFILES); IPR017986 (SUPERFAMILY)                    |
| 1865 | 297800_length_1501_cvg_17.9_tip_1_0 | 333  | neurofilament triplet h protein                    | 501 | 1.43E-28  | 51.70% | 0.108   | TRANSMEMBRANE (PHOBIUS); CYTOPLASMIC_DOMAIN (PHOBIUS); TRANSMEMBRANE (PHOBIUS); NON_CYTOPLASMIC_DOMAIN (PHOBIUS); TRANSMEMBRANE (PHOBIUS); CYTOPLASMIC_DOMAIN (PHOBIUS); NON_CYTOPLASMIC_DOMAIN (PHOBIUS); TMhelix (TMHMM); TMhelix (TMHMM); TMhelix (TMHMM)                                                                                                                                                                                                                                                                                                                                                                                                                                                          |
| 1866 | 297812_length_1503_cvg_8.6_tip_1_5  | 174  | collagen alpha-1 chain-like                        | 501 | 8.70E-121 | 81.50% | 0.154   | IPR001442 (SMART); IPR001442 (G3DSA:2.170.240.GENE3D); IPR001442 (PFAM); PTHR24023:SF381 (PANTHER); PTHR24023 (PANTHER); NON_CYTOPLASMIC_DOMAIN (PHOBIUS); CYTOPLASMIC_DOMAIN (PHOBIUS); TRANSMEMBRANE (PHOBIUS); IPR001442 (PROSITE_PROFILES); IPR001442 (PROSITE_PROFILES); IPR016187 (SUPERFAMILY); IPR016187 (SUPERFAMILY); IPR016187 (SUPERFAMILY)                                                                                                                                                                                                                                                                                                                                                               |
| 1867 | 297838_length_1506_cvg_32.4_tip_1_1 | 736  | torsin- partial                                    | 502 | 1.39E-109 | 66.80% | 0.441 Y | Coil (COILS); IPR027417 (G3DSA:3.40.50.GENE3D); IPR010448 (PFAM); IPR010448 (PANTHER); TRANSMEMBRANE (PHOBIUS); SIGNAL_PEPTIDE_H_REGION (PHOBIUS); CYTOPLASMIC_DOMAIN (PHOBIUS); SIGNAL_PEPTIDE (PHOBIUS); SIGNAL_PEPTIDE_C_REGION (PHOBIUS); NON_CYTOPLASMIC_DOMAIN (PHOBIUS); TRANSMEMBRANE (PHOBIUS); NON_CYTOPLASMIC_DOMAIN (PHOBIUS); SIGNAL_PEPTIDE_N_REGION (PHOBIUS); SignalP-TM (SIGNALP_GRAM_POSITIVE); IPR027417 (SUPERFAMILY); TMhelix (TMHMM)                                                                                                                                                                                                                                                            |
| 1868 | 297866_length_1511_cvg_6.2_tip_1_2  | 135  | scaffolding protein                                | 503 | 1.01E-19  | 64.50% | 0.099   | Coil (COILS); NON_CYTOPLASMIC_DOMAIN (PHOBIUS); TRANSMEMBRANE (PHOBIUS); CYTOPLASMIC_DOMAIN (PHOBIUS)                                                                                                                                                                                                                                                                                                                                                                                                                                                                                                                                                                                                                 |
| 1869 | 297878_length_1514_cvg_3.0_tip_1_0  | 73   | hemicentin-1 isoform x1                            | 505 | 6.59E-79  | 58.50% | 0.101   | IPR003598 (SMART); IPR013783 (G3DSA:2.60.40.GENE3D); PF13927 (PFAM); IPR013783 (G3DSA:2.60.40.GENE3D); PTHR11640 (PANTHER); PTHR11640:SF6 (PANTHER); NON_CYTOPLASMIC_DOMAIN (PHOBIUS); TRANSMEMBRANE (PHOBIUS); CYTOPLASMIC_DOMAIN (PHOBIUS); IPR007110 (PROSITE_PROFILES); IPR007110 (PROSITE_PROFILES); SSF48726 (SUPERFAMILY); SSF48726 (SUPERFAMILY); TMhelix (TMHMM)                                                                                                                                                                                                                                                                                                                                             |

|      |                                     |       |                                                  |     |           |        |         |                                                                                                                                                                                                                                                                                                                                                                                                                                                                                                                                                                                                                                      |
|------|-------------------------------------|-------|--------------------------------------------------|-----|-----------|--------|---------|--------------------------------------------------------------------------------------------------------------------------------------------------------------------------------------------------------------------------------------------------------------------------------------------------------------------------------------------------------------------------------------------------------------------------------------------------------------------------------------------------------------------------------------------------------------------------------------------------------------------------------------|
| 1870 | 297896_length_1516_cvg_60.5_tip_1_5 | 27199 | myosin heavy chain                               | 505 | 0         | 88.80% | 0.099   | Coil (COILS); Coil (COILS); Coil (COILS); IPR000048 (SMART); IPR002928 (PFAM); G3DSA:1.20.5.340 (GENE3D); IPR027401 (G3DSA:4.10.270.GENE3D); PTHR13140 (PANTHER); PTHR13140:SF364 (PANTHER); IPR000048 (PROSITE_PROFILES); IPR001609 (PROSITE_PROFILES); SSF90257 (SUPERFAMILY); SSF90257 (SUPERFAMILY); IPR027417 (SUPERFAMILY); SSF90257 (SUPERFAMILY)                                                                                                                                                                                                                                                                             |
| 1871 | 297900_length_1517_cvg_52.1_tip_1_2 | 1715  | masquerade-like protein                          | 505 | 1.29E-63  | 49.40% | 0.122   | IPR001314 (PRINTS); IPR001254 (SMART); G3DSA:2.40.10.10 (GENE3D); G3DSA:2.40.10.10 (GENE3D); G3DSA:2.40.10.10 (GENE3D); IPR001254 (PFAM); PTHR24268 (PANTHER); PTHR24268:SF95 (PANTHER); IPR018114 (PROSITE_PATTERNS); IPR001254 (PROSITE_PROFILES); IPR009003 (SUPERFAMILY)                                                                                                                                                                                                                                                                                                                                                         |
| 1872 | 297906_length_1517_cvg_21.1_tip_1_2 | 423   | tribbles homolog 2                               | 505 | 2.99E-123 | 74.40% | 0.134   | IPR002290 (SMART); IPR000719 (PFAM); G3DSA:3.30.200.20 (GENE3D); G3DSA:1.10.510.10 (GENE3D); IPR024104 (PANTHER); PTHR22961:SF4 (PANTHER); IPR000719 (PROSITE_PROFILES); IPR011009 (SUPERFAMILY)                                                                                                                                                                                                                                                                                                                                                                                                                                     |
| 1873 | 297922_length_1522_cvg_60.4_tip_1_3 | 6590  | nidogen-2 isoform x5                             | 508 | 5.80E-20  | 52.40% | 0.735 Y | IPR000716 (SMART); IPR000716 (G3DSA:4.10.800.GENE3D); IPR000716 (PFAM); IPR022339 (PANTHER); IPR000716 (PROSITE_PATTERNS); IPR000716 (PROSITE_PATTERNS); SIGNAL_PEPTIDE (PHOBIUS); SIGNAL_PEPTIDE_N_REGION (PHOBIUS); NON_CYTOPLASMIC_DOMAIN (PHOBIUS); TRANSMEMBRANE (PHOBIUS); CYTOPLASMIC_DOMAIN (PHOBIUS); SIGNAL_PEPTIDE_C_REGION (PHOBIUS); SIGNAL_PEPTIDE_H_REGION (PHOBIUS); IPR000716 (PROSITE_PROFILES); IPR000716 (PROSITE_PROFILES); SignalP-noTM (SIGNALP_EUK); IPR000716 (SUPERFAMILY); IPR000716 (SUPERFAMILY)                                                                                                        |
| 1875 | 297942_length_1524_cvg_25.0_tip_1_2 | 557   | agap007053-pa-like protein                       | 508 | 9.14E-75  | 49.90% | 0.162   | Coil (COILS); IPR000716 (SMART); IPR000716 (PFAM); IPR000716 (G3DSA:4.10.800.GENE3D); PTHR12352 (PANTHER); PTHR12352:SF9 (PANTHER); NON_CYTOPLASMIC_DOMAIN (PHOBIUS); CYTOPLASMIC_DOMAIN (PHOBIUS); TRANSMEMBRANE (PHOBIUS); CYTOPLASMIC_DOMAIN (PHOBIUS); TRANSMEMBRANE (PHOBIUS); IPR000716 (PROSITE_PROFILES); IPR000716 (PROSITE_PROFILES); IPR000716 (PROSITE_PROFILES); IPR000716 (SUPERFAMILY); IPR000716 (SUPERFAMILY); IPR000716 (SUPERFAMILY); TMhelix (TMHMM)                                                                                                                                                             |
| 1876 | 297982_length_1528_cvg_16.7_tip_1_3 | 265   | cytochrome p450 monooxygenase                    | 510 | 1.83E-125 | 58.70% | 0.189   | Coil (COILS); IPR001128 (PRINTS); IPR002401 (PRINTS); IPR001128 (PFAM); IPR001128 (G3DSA:1.10.630.GENE3D); PTHR24300 (PANTHER); IPR017972 (PROSITE_PATTERNS); TRANSMEMBRANE (PHOBIUS); CYTOPLASMIC_DOMAIN (PHOBIUS); NON_CYTOPLASMIC_DOMAIN (PHOBIUS); IPR001128 (SUPERFAMILY); TMhelix (TMHMM); TMhelix (TMHMM)                                                                                                                                                                                                                                                                                                                     |
| 1877 | 297990_length_1529_cvg_9.0_tip_1_0  | 159   | dnaj homolog subfamily b member 11               | 510 | 0         | 84.20% | 0.860 Y | IPR001623 (PRINTS); IPR001623 (SMART); G3DSA:2.60.260.20 (GENE3D); G3DSA:2.60.260.20 (GENE3D); IPR002939 (PFAM); IPR001623 (PFAM); IPR001623 (G3DSA:1.10.287.GENE3D); PTHR24077 (PANTHER); PTHR24077:SF210 (PANTHER); IPR018253 (PROSITE_PATTERNS); CYTOPLASMIC_DOMAIN (PHOBIUS); NON_CYTOPLASMIC_DOMAIN (PHOBIUS); SIGNAL_PEPTIDE_C_REGION (PHOBIUS); TRANSMEMBRANE (PHOBIUS); SIGNAL_PEPTIDE_H_REGION (PHOBIUS); SIGNAL_PEPTIDE_N_REGION (PHOBIUS); SIGNAL_PEPTIDE (PHOBIUS); IPR001623 (PROSITE_PROFILES); SignalP-noTM (SIGNALP_EUK); IPR008971 (SUPERFAMILY); IPR001623 (SUPERFAMILY); IPR008971 (SUPERFAMILY); TMhelix (TMHMM) |
| 1878 | 297996_length_1529_cvg_15.0_tip_1_1 | 232   | chitinase domain-containing protein 1 isoform x1 | 510 | 1.74E-149 | 70.30% | 0.165   | IPR011583 (SMART); IPR001223 (PFAM); IPR013781 (G3DSA:3.20.20.GENE3D); PTHR11177:SF135 (PANTHER); PTHR11177 (PANTHER); TRANSMEMBRANE (PHOBIUS); CYTOPLASMIC_DOMAIN (PHOBIUS); NON_CYTOPLASMIC_DOMAIN (PHOBIUS); IPR017853 (SUPERFAMILY); TMhelix (TMHMM)                                                                                                                                                                                                                                                                                                                                                                             |
| 1879 | 297998_length_1529_cvg_6.0_tip_1_0  | 121   | serine threonine-protein kinase warts            | 510 | 0         | 90.20% | 0.111   | IPR002290 (SMART); IPR000961 (SMART); G3DSA:3.30.200.20 (GENE3D); IPR000719 (PFAM); G3DSA:1.10.510.10 (GENE3D); IPR028741 (PTHR24356:PANTHER); PTHR24356 (PANTHER); IPR008271 (PROSITE_PATTERNS); NON_CYTOPLASMIC_DOMAIN (PHOBIUS); CYTOPLASMIC_DOMAIN (PHOBIUS); TRANSMEMBRANE (PHOBIUS); IPR000719 (PROSITE_PROFILES); IPR000961 (PROSITE_PROFILES); IPR011009 (SUPERFAMILY)                                                                                                                                                                                                                                                       |
| 1880 | 298018_length_1534_cvg_32.6_tip_1_4 | 723   | nidogen- partial                                 | 511 | 1.03E-106 | 73.40% | 0.101   | IPR000033 (SMART); IPR000033 (PFAM); IPR011042 (G3DSA:2.120.10.GENE3D); PTHR10529 (PANTHER); NON_CYTOPLASMIC_DOMAIN (PHOBIUS); CYTOPLASMIC_DOMAIN (PHOBIUS); TRANSMEMBRANE (PHOBIUS); IPR000033 (PROSITE_PROFILES); IPR000033 (PROSITE_PROFILES); IPR000033 (PROSITE_PROFILES); IPR000033 (PROSITE_PROFILES); SSF63825 (SUPERFAMILY); TMhelix (TMHMM)                                                                                                                                                                                                                                                                                |

|      |                                     |      |                                                              |     |           |        |         |                                                                                                                                                                                                                                                                                                                                                                                                                                                                                                                                                                                                                                        |
|------|-------------------------------------|------|--------------------------------------------------------------|-----|-----------|--------|---------|----------------------------------------------------------------------------------------------------------------------------------------------------------------------------------------------------------------------------------------------------------------------------------------------------------------------------------------------------------------------------------------------------------------------------------------------------------------------------------------------------------------------------------------------------------------------------------------------------------------------------------------|
| 1882 | 298022_length_1534_cvg_4.3_tip_1_5  | 97   | collagen and calcium-binding egf domain-containing protein 1 | 511 | 4.46E-100 | 52.80% | 0.307   | Coil (COILS); IPR000742 (SMART); IPR001881 (SMART); G3DSA:2.10.25.10 (GENE3D); IPR008160 (PFAM); PF14670 (PFAM); G3DSA:2.10.25.10 (GENE3D); PTHR24023 (PANTHER); IPR013032 (PROSITE_PATTERNS); NON_CYTOPLASMIC_DOMAIN (PHOBIUS); SIGNAL_PEPTIDE_H_REGION (PHOBIUS); SIGNAL_PEPTIDE_N_REGION (PHOBIUS); SIGNAL_PEPTIDE_C_REGION (PHOBIUS); SIGNAL_PEPTIDE (PHOBIUS); IPR000742 (PROSITE_PROFILES); SSF57196 (SUPERFAMILY)                                                                                                                                                                                                               |
| 1881 | 298022_length_1534_cvg_4.3_tip_1_0  | 97   | hypothetical protein CRE_06355                               | 512 | 7.35E-07  | 44.00% | 0.137   | no IPS match                                                                                                                                                                                                                                                                                                                                                                                                                                                                                                                                                                                                                           |
| 1883 | 298032_length_1536_cvg_12.9_tip_1_3 | 236  | von willebrand factor like 1                                 | 512 | 1.27E-07  | 38.75% | 0.114   | IPR001007 (PROSITE_PATTERNS); PD968187 (PRODOM); IPR001007 (PROSITE_PROFILES)                                                                                                                                                                                                                                                                                                                                                                                                                                                                                                                                                          |
| 1884 | 298056_length_1538_cvg_35.0_tip_1_5 | 643  | scp-like extracellular domain containing protein 1           | 512 | 7.00E-37  | 49.40% | 0.417 Y | IPR002413 (PRINTS); IPR001283 (PRINTS); IPR002172 (SMART); IPR014044 (SMART); IPR014044 (PFAM); IPR002172 (G3DSA:4.10.400.GENE3D); IPR014044 (G3DSA:3.40.33.GENE3D); IPR002172 (G3DSA:4.10.400.GENE3D); IPR002172 (PFAM); IPR001283 (PANTHER); IPR023415 (PROSITE_PATTERNS); IPR023415 (PROSITE_PATTERNS); IPR018244 (PROSITE_PATTERNS); TRANSMEMBRANE (PHOBIUS); CYTOPLASMIC_DOMAIN (PHOBIUS); NON_CYTOPLASMIC_DOMAIN (PHOBIUS); IPR002172 (PROSITE_PROFILES); IPR002172 (PROSITE_PROFILES); IPR002172 (SUPERFAMILY); IPR002172 (SUPERFAMILY); IPR014044 (SUPERFAMILY); TMhelix (TMHMM)                                               |
| 1885 | 298088_length_1541_cvg_5.2_tip_1_0  | 97   | carbohydrate sulfotransferase 11-like                        | 514 | 9.54E-67  | 55.00% | 0.176   | IPR005331 (PFAM); IPR018011 (PANTHER); CYTOPLASMIC_DOMAIN (PHOBIUS); TRANSMEMBRANE (PHOBIUS); NON_CYTOPLASMIC_DOMAIN (PHOBIUS); TMhelix (TMHMM)                                                                                                                                                                                                                                                                                                                                                                                                                                                                                        |
| 1886 | 298092_length_1543_cvg_3.9_tip_1_1  | 74   | dnaj homolog subfamily b member 12                           | 514 | 1.19E-135 | 81.60% | 0.1     | IPR001623 (PRINTS); IPR001623 (SMART); IPR001623 (G3DSA:1.10.287.GENE3D); IPR015399 (PFAM); IPR001623 (PFAM); PTHR24077:SF239 (PANTHER); PTHR24077 (PANTHER); IPR018253 (PROSITE_PATTERNS); TRANSMEMBRANE (PHOBIUS); CYTOPLASMIC_DOMAIN (PHOBIUS); NON_CYTOPLASMIC_DOMAIN (PHOBIUS); IPR001623 (PROSITE_PROFILES); IPR001623 (SUPERFAMILY); TMhelix (TMHMM)                                                                                                                                                                                                                                                                            |
| 1887 | 298120_length_1546_cvg_20.8_tip_1_5 | 436  | acidic phospholipase a2 pa4 isoform x2                       | 515 | 9.19E-43  | 56.90% | 0.846 Y | IPR001211 (PFAM); IPR016090 (G3DSA:1.20.90.GENE3D); PTHR12253 (PANTHER); IPR013090 (PROSITE_PATTERNS); NON_CYTOPLASMIC_DOMAIN (PHOBIUS); SIGNAL_PEPTIDE_N_REGION (PHOBIUS); SIGNAL_PEPTIDE_C_REGION (PHOBIUS); SIGNAL_PEPTIDE_H_REGION (PHOBIUS); SIGNAL_PEPTIDE (PHOBIUS); SignalP-noTM (SIGNALP_GRAM_NEGATIVE); SignalP-noTM (SIGNALP_EUK); IPR016090 (SUPERFAMILY); TMhelix (TMHMM)                                                                                                                                                                                                                                                 |
| 1888 | 298132_length_1547_cvg_9.3_tip_1_3  | 156  | microfibrillar-associated protein 1-like                     | 516 | 5.18E-177 | 78.00% | 0.1     | Coil (COILS); Coil (COILS); Coil (COILS); Coil (COILS); IPR009730 (PFAM); IPR009730 (PANTHER); PTHR15327:SF0 (PANTHER)                                                                                                                                                                                                                                                                                                                                                                                                                                                                                                                 |
| 1890 | 298158_length_1550_cvg_6.8_tip_1_0  | 153  | dentin sialophospho                                          | 517 | 5.74E-23  | 43.10% | 0.113   | no IPS match                                                                                                                                                                                                                                                                                                                                                                                                                                                                                                                                                                                                                           |
| 1891 | 298196_length_1555_cvg_23.1_tip_1_3 | 360  | iron zinc purple acid phosphatase-like protein               | 519 | 1.39E-129 | 78.40% | 0.101   | IPR029052 (G3DSA:3.60.21.GENE3D); IPR025733 (PFAM); IPR004843 (PFAM); PTHR22953 (PANTHER); PTHR22953:SF9 (PANTHER); TRANSMEMBRANE (PHOBIUS); CYTOPLASMIC_DOMAIN (PHOBIUS); NON_CYTOPLASMIC_DOMAIN (PHOBIUS); IPR029052 (SUPERFAMILY); TMhelix (TMHMM); TMhelix (TMHMM)                                                                                                                                                                                                                                                                                                                                                                 |
| 1892 | 298224_length_1557_cvg_6.2_tip_1_5  | 135  | f-box wd repeat-containing protein 7                         | 519 | 0         | 87.90% | 0.104   | IPR020472 (PRINTS); IPR001810 (SMART); IPR001680 (SMART); G3DSA:1.20.1280.50 (GENE3D); IPR001810 (PFAM); IPR015943 (G3DSA:2.130.10.GENE3D); IPR001680 (PFAM); PTHR22844 (PANTHER); PTHR22844:SF116 (PANTHER); IPR019775 (PROSITE_PATTERNS); IPR019775 (PROSITE_PATTERNS); IPR019775 (PROSITE_PATTERNS); IPR019775 (PROSITE_PATTERNS); IPR001680 (PROSITE_PROFILES); IPR001810 (PROSITE_PROFILES); IPR001680 (PROSITE_PROFILES); IPR001680 (PROSITE_PROFILES); IPR001680 (PROSITE_PROFILES); IPR017986 (PROSITE_PROFILES); IPR001680 (PROSITE_PROFILES); IPR001680 (PROSITE_PROFILES); IPR017986 (SUPERFAMILY); IPR001810 (SUPERFAMILY) |
| 1893 | 298250_length_1561_cvg_55.2_tip_1_3 | 2208 | beta-hexosaminidase subunit beta isoform x1                  | 521 | 0         | 68.80% | 0.289   | IPR025705 (PRINTS); IPR025705 (PIRSF); IPR029019 (PFAM); IPR015883 (PFAM); IPR029018 (G3DSA:3.30.379.GENE3D); IPR013781 (G3DSA:3.20.20.GENE3D); PTHR22600:SF7 (PANTHER); PTHR22600 (PANTHER); IPR017853 (SUPERFAMILY); IPR029018 (SUPERFAMILY)                                                                                                                                                                                                                                                                                                                                                                                         |
| 1894 | 298278_length_1565_cvg_60.3_tip_1_4 | 3928 | ferritin 1-like protein a                                    | 522 | 3.93E-45  | 65.00% | 0.499 Y | IPR012347 (G3DSA:1.20.1260.GENE3D); IPR008331 (PFAM); IPR001519 (PANTHER); PTHR11431:SF29 (PANTHER); TRANSMEMBRANE (PHOBIUS); NON_CYTOPLASMIC_DOMAIN (PHOBIUS); CYTOPLASMIC_DOMAIN (PHOBIUS); IPR009040 (PROSITE_PROFILES); SignalP-noTM (SIGNALP_EUK); IPR009078 (SUPERFAMILY)                                                                                                                                                                                                                                                                                                                                                        |



|      |                                     |      |                                          |     |           |        |         |                                                                                                                                                                                                                                                                                                                                                                                                                                                                                                                                                                                                                                                                        |
|------|-------------------------------------|------|------------------------------------------|-----|-----------|--------|---------|------------------------------------------------------------------------------------------------------------------------------------------------------------------------------------------------------------------------------------------------------------------------------------------------------------------------------------------------------------------------------------------------------------------------------------------------------------------------------------------------------------------------------------------------------------------------------------------------------------------------------------------------------------------------|
| 1895 | 298280_length_1566_cvg_11.8_tip_1_1 | 311  | protocadherin fat 4                      | 522 | 1.17E-68  | 48.20% | 0.112   | IPR002126 (PRINTS); IPR002126 (SMART); IPR002126 (G3DSA:2.60.40.GENE3D); IPR002126 (G3DSA:2.60.40.GENE3D); IPR002126 (PFAM); PTHR24027 (PANTHER); IPR020894 (PROSITE_PATTERNS); IPR002126 (PROSITE_PROFILES); IPR002126 (PROSITE_PROFILES); IPR002126 (PROSITE_PROFILES); IPR015919 (SUPERFAMILY); IPR015919 (SUPERFAMILY); IPR015919 (SUPERFAMILY); Coil (COILS); Coil (COILS); TRANSMEMBRANE (PHOBIUS); TRANSMEMBRANE (PHOBIUS); CYTOPLASMIC_DOMAIN (PHOBIUS); CYTOPLASMIC_DOMAIN (PHOBIUS); TRANSMEMBRANE (PHOBIUS); NON_CYTOPLASMIC_DOMAIN (PHOBIUS); NON_CYTOPLASMIC_DOMAIN (PHOBIUS)                                                                             |
| 1896 | 298282_length_1566_cvg_20.9_tip_1_4 | 334  | ---NA---                                 | 522 |           |        | 0.109   | IPR001680 (SMART); IPR015943 (G3DSA:2.130.10.GENE3D); IPR007287 (PFAM); IPR001680 (PFAM); PTHR22851:SF0 (PANTHER); PTHR22851 (PANTHER); IPR019775 (PROSITE_PATTERNS); IPR017986 (PROSITE_PROFILES); IPR001680 (PROSITE_PROFILES); IPR001680 (PROSITE_PROFILES); IPR001680 (PROSITE_PROFILES); IPR001680 (PROSITE_PROFILES); IPR017986 (SUPERFAMILY)                                                                                                                                                                                                                                                                                                                    |
| 1897 | 298332_length_1573_cvg_19.2_tip_1_1 | 409  | ddb1- and cul4-associated factor 13-like | 524 | 0         | 80.80% | 0.101   | IPR000668 (PRINTS); IPR013201 (SMART); IPR000668 (SMART); IPR000668 (PFAM); G3DSA:3.90.70.10 (GENE3D); IPR013201 (PFAM); PTHR12411:SF57 (PANTHER); IPR013128 (PANTHER); IPR025661 (PROSITE_PATTERNS); IPR025660 (PROSITE_PATTERNS); IPR000169 (PROSITE_PATTERNS); NON_CYTOPLASMIC_DOMAIN (PHOBIUS); CYTOPLASMIC_DOMAIN (PHOBIUS); TRANSMEMBRANE (PHOBIUS); SSF54001 (SUPERFAMILY); TMhelix (TMHMM)                                                                                                                                                                                                                                                                     |
| 1898 | 298336_length_1573_cvg_34.2_tip_1_4 | 664  | cathepsin I                              | 524 | 4.40E-167 | 77.20% | 0.116   | IPR001314 (PRINTS); IPR001254 (SMART); G3DSA:2.40.10.10 (GENE3D); IPR001254 (PFAM); G3DSA:2.40.10.10 (GENE3D); PTHR24256 (PANTHER); IPR018114 (PROSITE_PATTERNS); IPR018114 (PROSITE_PATTERNS); SIGNAL_PEPTIDE_C_REGION (PHOBIUS); SIGNAL_PEPTIDE (PHOBIUS); SIGNAL_PEPTIDE_H_REGION (PHOBIUS); SIGNAL_PEPTIDE_N_REGION (PHOBIUS); NON_CYTOPLASMIC_DOMAIN (PHOBIUS); IPR001254 (PROSITE_PROFILES); IPR009003 (SUPERFAMILY)                                                                                                                                                                                                                                             |
| 1899 | 298338_length_1573_cvg_22.4_tip_1_2 | 508  | plasminogen activator spa                | 524 | 6.97E-84  | 64.60% | 0.486 Y | IPR004878 (PFAM); IPR004878 (PANTHER); PTHR21522:SF41 (PANTHER); CYTOPLASMIC_DOMAIN (PHOBIUS); TRANSMEMBRANE (PHOBIUS); TRANSMEMBRANE (PHOBIUS); NON_CYTOPLASMIC_DOMAIN (PHOBIUS); NON_CYTOPLASMIC_DOMAIN (PHOBIUS); TRANSMEMBRANE (PHOBIUS); NON_CYTOPLASMIC_DOMAIN (PHOBIUS); CYTOPLASMIC_DOMAIN (PHOBIUS); TRANSMEMBRANE (PHOBIUS); TRANSMEMBRANE (PHOBIUS); TRANSMEMBRANE (PHOBIUS); NON_CYTOPLASMIC_DOMAIN (PHOBIUS); TRANSMEMBRANE (PHOBIUS); CYTOPLASMIC_DOMAIN (PHOBIUS); TRANSMEMBRANE (PHOBIUS); CYTOPLASMIC_DOMAIN (PHOBIUS); TRANSMEMBRANE (PHOBIUS); TMhelix (TMHMM); TMhelix (TMHMM); TMhelix (TMHMM); TMhelix (TMHMM); TMhelix (TMHMM); TMhelix (TMHMM) |
| 1900 | 298346_length_1575_cvg_8.0_tip_1_4  | 189  | otopetrin-2-like isoform x3              | 525 | 2.40E-123 | 64.70% | 0.102   | IPR008930 (G3DSA:1.50.10.GENE3D); IPR002157 (PFAM); IPR002157 (PANTHER); PTHR10559:SF12 (PANTHER); SIGNAL_PEPTIDE_H_REGION (PHOBIUS); SIGNAL_PEPTIDE_N_REGION (PHOBIUS); SIGNAL_PEPTIDE_C_REGION (PHOBIUS); NON_CYTOPLASMIC_DOMAIN (PHOBIUS); SIGNAL_PEPTIDE (PHOBIUS); IPR008930 (SUPERFAMILY); TMhelix (TMHMM)                                                                                                                                                                                                                                                                                                                                                       |
| 1903 | 298356_length_1577_cvg_16.3_tip_1_2 | 380  | hypothetical protein L798_00519          | 525 | 5.58E-71  | 50.80% | 0.392 Y | IPR002172 (PRINTS); IPR002172 (SMART); IPR002172 (G3DSA:4.10.400.GENE3D); IPR002172 (G3DSA:4.10.400.GENE3D); IPR000998 (PFAM); IPR002172 (PFAM); PTHR10529 (PANTHER); PTHR10529:SF222 (PANTHER); IPR002172 (PROSITE_PROFILES); IPR002172 (PROSITE_PROFILES); IPR000998 (PROSITE_PROFILES); IPR002172 (SUPERFAMILY); IPR002172 (SUPERFAMILY); IPR013320 (SUPERFAMILY)                                                                                                                                                                                                                                                                                                   |
| 1901 | 298350_length_1576_cvg_7.0_tip_1_0  | 136  | sortilin-related receptor-like           | 526 | 4.74E-11  | 44.00% | 0.121   | IPR001254 (PFAM); G3DSA:2.40.10.10 (GENE3D); G3DSA:2.40.10.10 (GENE3D); PTHR24268:SF95 (PANTHER); PTHR24268 (PANTHER); IPR018114 (PROSITE_PATTERNS); SIGNAL_PEPTIDE_H_REGION (PHOBIUS); NON_CYTOPLASMIC_DOMAIN (PHOBIUS); SIGNAL_PEPTIDE_C_REGION (PHOBIUS); SIGNAL_PEPTIDE (PHOBIUS); SIGNAL_PEPTIDE_N_REGION (PHOBIUS); SignalP-noTM (SIGNALP_EUK); IPR009003 (SUPERFAMILY); TMhelix (TMHMM)                                                                                                                                                                                                                                                                         |
| 1902 | 298354_length_1577_cvg_64.6_tip_0_0 | 2631 | prophenoloxidase activating factor       | 526 | 2.85E-26  | 53.80% | 0.604 Y |                                                                                                                                                                                                                                                                                                                                                                                                                                                                                                                                                                                                                                                                        |

|      |                                     |      |                                                                       |     |           |        |       |                                                                                                                                                                                                                                                                                                                                                                                                                                                                                                                                                                                                                                    |
|------|-------------------------------------|------|-----------------------------------------------------------------------|-----|-----------|--------|-------|------------------------------------------------------------------------------------------------------------------------------------------------------------------------------------------------------------------------------------------------------------------------------------------------------------------------------------------------------------------------------------------------------------------------------------------------------------------------------------------------------------------------------------------------------------------------------------------------------------------------------------|
| 1904 | 298362_length_1577_cvg_13.7_tip_1_3 | 293  | aael014742- partial                                                   | 526 | 1.98E-86  | 56.70% | 0.138 | IPR002110 (PRINTS); IPR002110 (SMART); IPR020683 (G3DSA:1.25.40.GENE3D); IPR020683 (G3DSA:1.25.40.GENE3D); IPR020683 (G3DSA:1.25.40.GENE3D); IPR020683 (PFAM); IPR020683 (G3DSA:1.25.40.GENE3D); IPR002110 (PFAM); IPR020683 (G3DSA:1.25.40.GENE3D); PTHR24133 (PANTHER); PTHR24133:SF17 (PANTHER); IPR002110 (PROSITE_PROFILES); IPR002110 (PROSITE_PROFILES); IPR002110 (PROSITE_PROFILES); IPR002110 (PROSITE_PROFILES); IPR020683 (PROSITE_PROFILES); IPR002110 (PROSITE_PROFILES); IPR002110 (PROSITE_PROFILES); IPR002110 (PROSITE_PROFILES); IPR002110 (PROSITE_PROFILES); IPR020683 (SUPERFAMILY); IPR020683 (SUPERFAMILY) |
| 1905 | 298446_length_1589_cvg_18.9_tip_1_0 | 419  | low quality protein: microtubule-associated protein 1a                | 530 | 3.19E-08  | 54.00% | 0.106 | no IPS match                                                                                                                                                                                                                                                                                                                                                                                                                                                                                                                                                                                                                       |
| 1906 | 298450_length_1590_cvg_59.0_tip_1_3 | 5642 | low affinity immunoglobulin epsilon fc receptor                       | 530 | 1.07E-18  | 53.80% | 0.113 | IPR001304 (SMART); IPR001304 (PFAM); IPR016186 (G3DSA:3.10.100.GENE3D); PTHR22802 (PANTHER); IPR018378 (PROSITE_PATTERNS); NON_CYTOPLASMIC_DOMAIN (PHOBIUS); TRANSMEMBRANE (PHOBIUS); CYTOPLASMIC_DOMAIN (PHOBIUS); IPR001304 (PROSITE_PROFILES); IPR016187 (SUPERFAMILY); TMhelix (TMHMM)                                                                                                                                                                                                                                                                                                                                         |
| 1907 | 298452_length_1590_cvg_13.4_tip_1_5 | 309  | flavin-containing monooxygenase fmo gs-ox3                            | 530 | 2.14E-144 | 64.80% | 0.177 | IPR000960 (PRINTS); G3DSA:3.50.50.60 (GENE3D); G3DSA:3.50.50.60 (GENE3D); IPR020946 (PFAM); PTHR23023:SF4 (PANTHER); PTHR23023 (PANTHER); SSF51905 (SUPERFAMILY); SSF51905 (SUPERFAMILY)                                                                                                                                                                                                                                                                                                                                                                                                                                           |
| 1908 | 298468_length_1593_cvg_9.6_tip_1_4  | 219  | alkaline tissue-nonspecific isozyme-like                              | 531 | 1.80E-147 | 63.80% | 0.141 | IPR001952 (PRINTS); IPR001952 (SMART); IPR001952 (PFAM); IPR017849 (G3DSA:3.40.720.GENE3D); PTHR11596 (PANTHER); IPR018299 (PROSITE_PATTERNS); IPR017850 (SUPERFAMILY)                                                                                                                                                                                                                                                                                                                                                                                                                                                             |
| 1909 | 298482_length_1594_cvg_5.2_tip_1_2  | 100  | mam and ldl-receptor class a domain-containing protein c10orf112-like | 531 | 4.66E-85  | 49.80% | 0.097 | IPR002172 (PRINTS); IPR002172 (SMART); IPR000998 (SMART); IPR002172 (G3DSA:4.10.400.GENE3D); IPR000998 (PFAM); IPR002172 (PFAM); IPR002172 (G3DSA:4.10.400.GENE3D); PTHR23282:SF75 (PANTHER); PTHR23282 (PANTHER); IPR023415 (PROSITE_PATTERNS); IPR002172 (PROSITE_PROFILES); IPR000998 (PROSITE_PROFILES); IPR000998 (PROSITE_PROFILES); IPR002172 (PROSITE_PROFILES); IPR000998 (PROSITE_PROFILES); IPR002172 (SUPERFAMILY); IPR013320 (SUPERFAMILY); IPR013320 (SUPERFAMILY); IPR002172 (SUPERFAMILY); IPR013320 (SUPERFAMILY)                                                                                                 |
| 1910 | 298520_length_1600_cvg_23.2_tip_1_5 | 491  | aael014742- partial                                                   | 533 | 2.40E-83  | 55.80% | 0.127 | IPR002110 (PRINTS); IPR002110 (SMART); IPR002110 (PFAM); IPR020683 (G3DSA:1.25.40.GENE3D); IPR020683 (G3DSA:1.25.40.GENE3D); IPR020683 (PFAM); PTHR24133:SF17 (PANTHER); PTHR24133 (PANTHER); IPR002110 (PROSITE_PROFILES); IPR020683 (PROSITE_PROFILES); IPR002110 (PROSITE_PROFILES); IPR002110 (PROSITE_PROFILES); IPR020683 (SUPERFAMILY); IPR020683 (SUPERFAMILY)                                           |
| 1911 | 298522_length_1600_cvg_2.3_tip_1_1  | 67   | endoplasmic reticulum mannosyl-oligosaccharide - alpha-mannosidase    | 533 | 0         | 80.70% | 0.107 | IPR001382 (PRINTS); IPR001382 (G3DSA:1.50.10.GENE3D); IPR001382 (PFAM); PTHR11742:SF7 (PANTHER); IPR001382 (PANTHER); IPR001382 (SUPERFAMILY)                                                                                                                                                                                                                                                                                                                                                                                                                                                                                      |
| 1912 | 298540_length_1602_cvg_62.4_tip_1_4 | 3235 | phosphoglycerate kinase                                               | 534 | 0         | 87.40% | 0.258 | IPR001576 (PRINTS); IPR015824 (G3DSA:3.40.50.GENE3D); IPR015901 (G3DSA:3.40.50.GENE3D); IPR001576 (PFAM); IPR001576 (PANTHER); PTHR11406:SF6 (PANTHER); IPR015911 (PROSITE_PATTERNS); IPR001576 (HAMAP); IPR001576 (SUPERFAMILY)                                                                                                                                                                                                                                                                                                                                                                                                   |
| 1913 | 298546_length_1603_cvg_5.8_tip_1_5  | 148  | 15-hydroxyprostaglandin dehydrogenase                                 | 534 | 1.14E-50  | 60.10% | 0.201 | IPR002347 (PRINTS); IPR002198 (PRINTS); IPR016040 (G3DSA:3.40.50.GENE3D); IPR002198 (PFAM); PTHR24310 (PANTHER); IPR020904 (PROSITE_PATTERNS); CYTOPLASMIC_DOMAIN (PHOBIUS); TRANSMEMBRANE (PHOBIUS); NON_CYTOPLASMIC_DOMAIN (PHOBIUS); TRANSMEMBRANE (PHOBIUS); NON_CYTOPLASMIC_DOMAIN (PHOBIUS); SSF51735 (SUPERFAMILY)                                                                                                                                                                                                                                                                                                          |

|      |                                     |      |                                                  |     |           |        |         |                                                                                                                                                                                                                                                                                                                                                                                                                                                                                                                                                                                                                         |
|------|-------------------------------------|------|--------------------------------------------------|-----|-----------|--------|---------|-------------------------------------------------------------------------------------------------------------------------------------------------------------------------------------------------------------------------------------------------------------------------------------------------------------------------------------------------------------------------------------------------------------------------------------------------------------------------------------------------------------------------------------------------------------------------------------------------------------------------|
| 1914 | 298548_length_1604_cvg_41.9_tip_1_2 | 1238 | secreted salivary gland                          | 534 | 2.03E-31  | 49.50% | 0.470 Y | IPR004991 (PFAM); IPR023307 (G3DSA:2.170.15.GENE3D); TRANSMEMBRANE (PHOBIUS); SIGNAL_PEPTIDE_H_REGION (PHOBIUS); SIGNAL_PEPTIDE (PHOBIUS); SIGNAL_PEPTIDE_N_REGION (PHOBIUS); TRANSMEMBRANE (PHOBIUS); NON_CYTOPLASMIC_DOMAIN (PHOBIUS); NON_CYTOPLASMIC_DOMAIN (PHOBIUS); CYTOPLASMIC_DOMAIN (PHOBIUS); SIGNAL_PEPTIDE_C_REGION (PHOBIUS); SignalP-noTM (SIGNALP_EUK); SSF56973 (SUPERFAMILY); TMhelix (TMHMM); TMhelix (TMHMM)                                                                                                                                                                                        |
| 1915 | 298576_length_1610_cvg_10.5_tip_1_3 | 239  | venom metalloproteinase 3 isoform x3             | 537 | 5.27E-97  | 61.80% | 0.114   | IPR024079 (G3DSA:3.40.390.GENE3D); PTHR13723 (PANTHER); PTHR13723:SF148 (PANTHER); SSF55486 (SUPERFAMILY)                                                                                                                                                                                                                                                                                                                                                                                                                                                                                                               |
| 1916 | 298578_length_1610_cvg_30.9_tip_1_1 | 560  | myosin heavy chain                               | 537 | 2.03E-12  | 47.33% | 0.118   | Coil (COILS); Coil (COILS)                                                                                                                                                                                                                                                                                                                                                                                                                                                                                                                                                                                              |
| 1917 | 298584_length_1611_cvg_4.0_tip_1_4  | 95   | urokinase-type plasminogen activator             | 537 | 1.90E-64  | 56.20% | 0.129   | IPR001314 (PRINTS); IPR002172 (SMART); IPR001254 (SMART); G3DSA:2.40.10.10 (GENE3D); IPR002172 (G3DSA:4.10.400.GENE3D); IPR002172 (PFAM); G3DSA:2.40.10.10 (GENE3D); IPR001254 (PFAM); G3DSA:2.40.10.10 (GENE3D); PTHR24265 (PANTHER); IPR018114 (PROSITE_PATTERNS); IPR018114 (PROSITE_PATTERNS); IPR001254 (PROSITE_PROFILES); IPR002172 (PROSITE_PROFILES); IPR009003 (SUPERFAMILY); IPR002172 (SUPERFAMILY)                                                                                                                                                                                                         |
| 1918 | 298608_length_1613_cvg_9.5_tip_1_1  | 192  | cgmp-dependent protein kinase 1-like             | 538 | 0         | 83.10% | 0.161   | IPR002374 (PRINTS); IPR000595 (SMART); IPR002290 (SMART); IPR000961 (SMART); IPR000595 (PFAM); IPR000719 (PFAM); IPR014710 (G3DSA:2.60.120.GENE3D); G3DSA:3.30.200.20 (GENE3D); IPR014710 (G3DSA:2.60.120.GENE3D); G3DSA:1.10.510.10 (GENE3D); PTHR24353 (PANTHER); PTHR24353:SF33 (PANTHER); IPR017441 (PROSITE_PATTERNS); IPR018488 (PROSITE_PATTERNS); IPR008271 (PROSITE_PATTERNS); IPR018488 (PROSITE_PATTERNS); IPR000595 (PROSITE_PROFILES); IPR000595 (PROSITE_PROFILES); IPR000961 (PROSITE_PROFILES); IPR000719 (PROSITE_PROFILES); IPR018490 (SUPERFAMILY); IPR011009 (SUPERFAMILY); IPR018490 (SUPERFAMILY) |
| 1919 | 298618_length_1615_cvg_7.4_tip_1_5  | 150  | thioredoxin-related transmembrane protein 1-like | 538 | 9.90E-98  | 71.30% | 0.684 Y | IPR013766 (PFAM); IPR012336 (G3DSA:3.40.30.GENE3D); PTHR18929:SF81 (PANTHER); PTHR18929 (PANTHER); IPR017937 (PROSITE_PATTERNS); TRANSMEMBRANE (PHOBIUS); NON_CYTOPLASMIC_DOMAIN (PHOBIUS); SIGNAL_PEPTIDE (PHOBIUS); SIGNAL_PEPTIDE_N_REGION (PHOBIUS); SIGNAL_PEPTIDE_C_REGION (PHOBIUS); CYTOPLASMIC_DOMAIN (PHOBIUS); SIGNAL_PEPTIDE_H_REGION (PHOBIUS); IPR012336 (PROSITE_PROFILES); SignalP-noTM (SIGNALP_EUK); IPR012336 (SUPERFAMILY); TMhelix (TMHMM)                                                                                                                                                         |
| 1920 | 298634_length_1616_cvg_5.3_tip_1_0  | 103  | papilin isoform x2                               | 539 | 7.98E-106 | 63.20% | 0.143   | IPR003599 (SMART); IPR003598 (SMART); IPR013783 (G3DSA:2.60.40.GENE3D); IPR013098 (PFAM); IPR013783 (G3DSA:2.60.40.GENE3D); IPR010909 (PFAM); PTHR10489 (PANTHER); CYTOPLASMIC_DOMAIN (PHOBIUS); CYTOPLASMIC_DOMAIN (PHOBIUS); TRANSMEMBRANE (PHOBIUS); NON_CYTOPLASMIC_DOMAIN (PHOBIUS); TRANSMEMBRANE (PHOBIUS); NON_CYTOPLASMIC_DOMAIN (PHOBIUS); TRANSMEMBRANE (PHOBIUS); IPR007110 (PROSITE_PROFILES); IPR010909 (PROSITE_PROFILES); IPR007110 (PROSITE_PROFILES); SSF48726 (SUPERFAMILY); SSF48726 (SUPERFAMILY); TMhelix (TMHMM); TMhelix (TMHMM)                                                                |
| 1921 | 298636_length_1616_cvg_47.0_tip_1_1 | 1586 | d-aspartate oxidase                              | 539 | 1.91E-98  | 63.60% | 0.13    | IPR016040 (G3DSA:3.40.50.GENE3D); IPR006076 (PFAM); IPR023209 (PANTHER); PTHR11530:SF0 (PANTHER); IPR006181 (PROSITE_PATTERNS); SSF51971 (SUPERFAMILY); SSF54373 (SUPERFAMILY)                                                                                                                                                                                                                                                                                                                                                                                                                                          |
| 1922 | 298642_length_1618_cvg_38.1_tip_1_2 | 940  | ras-related protein rab-10                       | 539 | 1.71E-116 | 92.90% | 0.207   | IPR001806 (PRINTS); IPR024156 (SMART); IPR003579 (SMART); IPR002041 (SMART); IPR020849 (SMART); IPR003578 (SMART); IPR005225 (TIGRFAM); IPR001806 (PFAM); IPR027417 (G3DSA:3.40.50.GENE3D); PTHR24073 (PANTHER); PTHR24073:SF456 (PANTHER); NON_CYTOPLASMIC_DOMAIN (PHOBIUS); CYTOPLASMIC_DOMAIN (PHOBIUS); TRANSMEMBRANE (PHOBIUS); PS51419 (PROSITE_PROFILES); IPR027417 (SUPERFAMILY)                                                                                                                                                                                                                                |
| 1923 | 298658_length_1619_cvg_13.6_tip_1_4 | 251  | n-acetylglucosamine-6- partial                   | 540 | 9.75E-96  | 55.90% | 0.105   | IPR017849 (G3DSA:3.40.720.GENE3D); IPR000917 (PFAM); PTHR10342:SF208 (PANTHER); PTHR10342 (PANTHER); IPR017850 (SUPERFAMILY)                                                                                                                                                                                                                                                                                                                                                                                                                                                                                            |
| 1924 | 298666_length_1620_cvg_7.6_tip_1_0  | 152  | periodic tryptophan protein 1 homolog            | 540 | 1.81E-151 | 64.20% | 0.123   | IPR020472 (PRINTS); IPR001680 (SMART); IPR001680 (PFAM); IPR015943 (G3DSA:2.130.10.GENE3D); PTHR14091 (PANTHER); IPR019775 (PROSITE_PATTERNS); IPR019775 (PROSITE_PATTERNS); IPR001680 (PROSITE_PROFILES); IPR001680 (PROSITE_PROFILES); IPR017986 (PROSITE_PROFILES); IPR001680 (PROSITE_PROFILES); IPR017986 (SUPERFAMILY)                                                                                                                                                                                                                                                                                            |



|      |                                     |      |                                                                                                              |     |           |        |         |                                                                                                                                                                                                                                                                                                                                                                                                                                                                                                                                                                                                                                                                                                                                                                |
|------|-------------------------------------|------|--------------------------------------------------------------------------------------------------------------|-----|-----------|--------|---------|----------------------------------------------------------------------------------------------------------------------------------------------------------------------------------------------------------------------------------------------------------------------------------------------------------------------------------------------------------------------------------------------------------------------------------------------------------------------------------------------------------------------------------------------------------------------------------------------------------------------------------------------------------------------------------------------------------------------------------------------------------------|
| 1936 | 298838_length_1648_cvg_24.4_tip_1_2 | 918  | macro domain-containing protein 2                                                                            | 549 | 2.25E-83  | 69.40% | 0.102   | Coil (COILS); IPR002589 (SMART); IPR002589 (PFAM); G3DSA:3.40.220.10 (GENE3D); PTHR11106 (PANTHER); CYTOPLASMIC_DOMAIN (PHOBIUS); TRANSMEMBRANE (PHOBIUS); TRANSMEMBRANE (PHOBIUS); NON_CYTOPLASMIC_DOMAIN (PHOBIUS); CYTOPLASMIC_DOMAIN (PHOBIUS); IPR002589 (PROSITE_PROFILES); SSF52949 (SUPERFAMILY); TMhelix (TMHMM)                                                                                                                                                                                                                                                                                                                                                                                                                                      |
| 1937 | 298840_length_1649_cvg_7.9_tip_1_0  | 196  | bone morphogenetic protein 2-like                                                                            | 550 | 7.89E-18  | 51.90% | 0.137   | IPR001839 (SMART); IPR029034 (G3DSA:2.10.90.GENE3D); IPR001839 (PFAM); PTHR11848:SF126 (PANTHER); IPR015615 (PANTHER); IPR017948 (PROSITE_PATTERNS); IPR001839 (PROSITE_PROFILES); IPR029034 (SUPERFAMILY)                                                                                                                                                                                                                                                                                                                                                                                                                                                                                                                                                     |
| 1938 | 298846_length_1650_cvg_42.2_tip_1_0 | 871  | cadherin-89d isoform x1                                                                                      | 550 | 3.37E-14  | 44.90% | 0.136   | IPR002126 (PRINTS); IPR002126 (SMART); IPR002126 (G3DSA:2.60.40.GENE3D); IPR002126 (PFAM); IPR002126 (G3DSA:2.60.40.GENE3D); PTHR24027 (PANTHER); CYTOPLASMIC_DOMAIN (PHOBIUS); TRANSMEMBRANE (PHOBIUS); TRANSMEMBRANE (PHOBIUS); TRANSMEMBRANE (PHOBIUS); NON_CYTOPLASMIC_DOMAIN (PHOBIUS); NON_CYTOPLASMIC_DOMAIN (PHOBIUS); CYTOPLASMIC_DOMAIN (PHOBIUS); IPR002126 (PROSITE_PROFILES); IPR015919 (SUPERFAMILY); IPR015919 (SUPERFAMILY); TMhelix (TMHMM); TMhelix (TMHMM); TMhelix (TMHMM)                                                                                                                                                                                                                                                                 |
| 1939 | 298864_length_1653_cvg_7.6_tip_1_1  | 186  | vitellogenin receptor                                                                                        | 551 | 1.24E-52  | 47.50% | 0.107   | IPR002172 (PRINTS); IPR000033 (SMART); IPR002172 (SMART); G3DSA:2.10.25.10 (GENE3D); IPR011042 (G3DSA:2.120.10.GENE3D); PF14670 (PFAM); IPR002172 (G3DSA:4.10.400.GENE3D); IPR002172 (PFAM); PTHR10529 (PANTHER); PTHR10529:SF204 (PANTHER); IPR023415 (PROSITE_PATTERNS); IPR023415 (PROSITE_PATTERNS); CYTOPLASMIC_DOMAIN (PHOBIUS); TRANSMEMBRANE (PHOBIUS); NON_CYTOPLASMIC_DOMAIN (PHOBIUS); IPR002172 (PROSITE_PROFILES); IPR002172 (PROSITE_PROFILES); IPR000033 (PROSITE_PROFILES); IPR000033 (PROSITE_PROFILES); IPR000033 (PROSITE_PROFILES); IPR000033 (PROSITE_PROFILES); IPR002172 (PROSITE_PROFILES); SSF57196 (SUPERFAMILY); IPR002172 (SUPERFAMILY); SSF63825 (SUPERFAMILY); IPR002172 (SUPERFAMILY); IPR002172 (SUPERFAMILY); TMhelix (TMHMM) |
| 1940 | 298888_length_1659_cvg_7.3_tip_1_4  | 156  | macrophage mannose receptor 1                                                                                | 553 | 1.17E-20  | 36.00% | 0.107   | IPR001304 (SMART); IPR001304 (PFAM); IPR016186 (G3DSA:3.10.100.GENE3D); IPR016186 (G3DSA:3.10.100.GENE3D); PTHR22803:SF55 (PANTHER); PTHR22803 (PANTHER); IPR001304 (PROSITE_PROFILES); IPR001304 (PROSITE_PROFILES); IPR001304 (PROSITE_PROFILES); IPR016187 (SUPERFAMILY); IPR016187 (SUPERFAMILY); IPR016187 (SUPERFAMILY)                                                                                                                                                                                                                                                                                                                                                                                                                                  |
| 1941 | 298890_length_1659_cvg_55.9_tip_1_4 | 2753 | retinal dehydrogenase 1-like                                                                                 | 553 | 0         | 80.40% | 0.442 Y | IPR015590 (PFAM); IPR016163 (G3DSA:3.40.309.GENE3D); IPR016162 (G3DSA:3.40.605.GENE3D); PTHR11699:SF145 (PANTHER); PTHR11699 (PANTHER); IPR029510 (PROSITE_PATTERNS); IPR016160 (PROSITE_PATTERNS); IPR016161 (SUPERFAMILY)                                                                                                                                                                                                                                                                                                                                                                                                                                                                                                                                    |
| 1942 | 298910_length_1663_cvg_9.8_tip_1_2  | 213  | leucine-rich repeat and immunoglobulin-like domain-containing nogo receptor-interacting protein 3 isoform x2 | 554 | 3.07E-141 | 64.60% | 0.127   | Coil (COILS); IPR003599 (SMART); IPR003598 (SMART); IPR013783 (G3DSA:2.60.40.GENE3D); IPR013098 (PFAM); G3DSA:3.80.10.10 (GENE3D); PTHR24373:SF38 (PANTHER); PTHR24373 (PANTHER); CYTOPLASMIC_DOMAIN (PHOBIUS); TRANSMEMBRANE (PHOBIUS); NON_CYTOPLASMIC_DOMAIN (PHOBIUS); IPR007110 (PROSITE_PROFILES); SSF52058 (SUPERFAMILY); SSF48726 (SUPERFAMILY); TMhelix (TMHMM)                                                                                                                                                                                                                                                                                                                                                                                       |
| 1943 | 298912_length_1665_cvg_5.6_tip_1_0  | 163  | cysteine-rich motor neuron 1 protein isoform x1                                                              | 555 | 2.90E-59  | 51.70% | 0.13    | IPR002223 (PRINTS); IPR002223 (SMART); IPR000716 (SMART); IPR002223 (G3DSA:4.10.410.GENE3D); IPR002223 (PFAM); IPR000716 (PFAM); IPR000716 (G3DSA:4.10.800.GENE3D); PTHR10083 (PANTHER); IPR020901 (PROSITE_PATTERNS); IPR000716 (PROSITE_PATTERNS); CYTOPLASMIC_DOMAIN (PHOBIUS); NON_CYTOPLASMIC_DOMAIN (PHOBIUS); TRANSMEMBRANE (PHOBIUS); IPR000716 (PROSITE_PROFILES); IPR002223 (PROSITE_PROFILES); IPR000716 (SUPERFAMILY); IPR002223 (SUPERFAMILY); TMhelix (TMHMM)                                                                                                                                                                                                                                                                                    |





|      |                                     |       |                                                     |     |           |        |       |                                                                                                                                                                                                                                                                                                                                                                                                                                                                                            |
|------|-------------------------------------|-------|-----------------------------------------------------|-----|-----------|--------|-------|--------------------------------------------------------------------------------------------------------------------------------------------------------------------------------------------------------------------------------------------------------------------------------------------------------------------------------------------------------------------------------------------------------------------------------------------------------------------------------------------|
| 1952 | 299028_length_1682_cvg_62.0_tip_1_0 | 22625 | hemocytin isoform x1                                | 561 | 1.01E-20  | 42.80% | 0.101 | CYTOPLASMIC_DOMAIN (PHOBIUS); TRANSMEMBRANE (PHOBIUS); NON_CYTOPLASMIC_DOMAIN (PHOBIUS); IPR006207 (PROSITE_PROFILES); SignalP-TM (SIGNALP_GRAM_POSITIVE); TMhelix (TMHMM)                                                                                                                                                                                                                                                                                                                 |
| 1953 | 299042_length_1686_cvg_13.2_tip_1_0 | 219   | angiotensin-converting enzyme-like                  | 562 | 1.16E-113 | 78.90% | 0.144 | IPR001548 (PRINTS); IPR001548 (PFAM); PTHR10514:SF17 (PANTHER); IPR001548 (PANTHER); TRANSMEMBRANE (PHOBIUS); CYTOPLASMIC_DOMAIN (PHOBIUS); TRANSMEMBRANE (PHOBIUS); CYTOPLASMIC_DOMAIN (PHOBIUS); TRANSMEMBRANE (PHOBIUS); NON_CYTOPLASMIC_DOMAIN (PHOBIUS); NON_CYTOPLASMIC_DOMAIN (PHOBIUS); SSF55486 (SUPERFAMILY); TMhelix (TMHMM); TMhelix (TMHMM); TMhelix (TMHMM); TMhelix (TMHMM)                                                                                                 |
| 1954 | 299064_length_1689_cvg_7.9_tip_1_4  | 174   | chorion peroxidase-like                             | 563 | 8.28E-126 | 55.40% | 0.136 | IPR019791 (PRINTS); IPR019791 (PFAM); IPR019791 (G3DSA:1.10.640.GENE3D); PTHR11475 (PANTHER); IPR019791 (PROSITE_PROFILES); IPR010255 (SUPERFAMILY)                                                                                                                                                                                                                                                                                                                                        |
| 1955 | 299076_length_1692_cvg_22.1_tip_1_1 | 517   | multiple inositol polyphosphate phosphatase 1       | 564 | 5.02E-145 | 61.10% | 0.152 | IPR029033 (G3DSA:3.40.50.GENE3D); IPR000560 (PFAM); PTHR20963 (PANTHER); PTHR20963:SF8 (PANTHER); IPR000560 (PROSITE_PATTERNS); NON_CYTOPLASMIC_DOMAIN (PHOBIUS); NON_CYTOPLASMIC_DOMAIN (PHOBIUS); TRANSMEMBRANE (PHOBIUS); TRANSMEMBRANE (PHOBIUS); CYTOPLASMIC_DOMAIN (PHOBIUS); TRANSMEMBRANE (PHOBIUS); CYTOPLASMIC_DOMAIN (PHOBIUS); IPR029033 (SUPERFAMILY)                                                                                                                         |
| 1956 | 299084_length_1693_cvg_24.8_tip_1_5 | 473   | neutral and basic amino acid transport protein rbat | 564 | 6.30E-144 | 57.90% | 0.187 | IPR006589 (SMART); IPR013781 (G3DSA:3.20.20.GENE3D); G3DSA:3.90.400.10 (GENE3D); IPR006047 (PFAM); PTHR10357:SF77 (PANTHER); IPR015902 (PANTHER); TRANSMEMBRANE (PHOBIUS); CYTOPLASMIC_DOMAIN (PHOBIUS); NON_CYTOPLASMIC_DOMAIN (PHOBIUS); IPR017853 (SUPERFAMILY); TMhelix (TMHMM)                                                                                                                                                                                                        |
| 1957 | 299088_length_1693_cvg_6.0_tip_1_4  | 143   | tyrosine-protein kinase csk                         | 564 | 0         | 85.70% | 0.322 | IPR000980 (PRINTS); IPR001245 (PRINTS); IPR000980 (SMART); IPR020635 (SMART); G3DSA:1.10.510.10 (GENE3D); G3DSA:3.30.200.20 (GENE3D); IPR000980 (PFAM); IPR000980 (G3DSA:3.30.505.GENE3D); IPR001245 (PFAM); PTHR24418:SF192 (PANTHER); PTHR24418 (PANTHER); IPR017441 (PROSITE_PATTERNS); IPR008266 (PROSITE_PATTERNS); IPR000719 (PROSITE_PROFILES); IPR000980 (PROSITE_PROFILES); IPR011009 (SUPERFAMILY); IPR000980 (SUPERFAMILY); TMhelix (TMHMM)                                     |
| 1958 | 299096_length_1697_cvg_20.9_tip_1_3 | 443   | pdgf- and vegf-related factor 1-like precursor      | 566 | 7.23E-54  | 55.50% | 0.328 | IPR000072 (SMART); IPR000072 (PFAM); IPR029034 (G3DSA:2.10.90.GENE3D); PTHR11633:SF1 (PANTHER); PTHR11633 (PANTHER); SIGNAL_PEPTIDE (PHOBIUS); SIGNAL_PEPTIDE_H_REGION (PHOBIUS); SIGNAL_PEPTIDE_N_REGION (PHOBIUS); SIGNAL_PEPTIDE_C_REGION (PHOBIUS); NON_CYTOPLASMIC_DOMAIN (PHOBIUS); IPR000072 (PROSITE_PROFILES); IPR029034 (SUPERFAMILY)                                                                                                                                            |
| 1959 | 299104_length_1698_cvg_7.2_tip_1_1  | 182   | annexin a4                                          | 566 | 6.31E-94  | 67.60% | 0.113 | IPR001464 (PRINTS); IPR018502 (SMART); IPR018502 (PFAM); IPR018502 (G3DSA:1.10.220.GENE3D); IPR018502 (G3DSA:1.10.220.GENE3D); IPR018502 (G3DSA:1.10.220.GENE3D); IPR018502 (G3DSA:1.10.220.GENE3D); PTHR10502 (PANTHER); IPR018252 (PROSITE_PATTERNS); IPR018252 (PROSITE_PATTERNS); IPR018252 (PROSITE_PATTERNS); SSF47874 (SUPERFAMILY)                                                                                                                                                 |
| 1960 | 299122_length_1701_cvg_22.7_tip_1_1 | 390   | nucleolar protein 56                                | 567 | 0         | 87.50% | 0.25  | Coil (COILS); IPR012976 (SMART); IPR002687 (PFAM); IPR012976 (PFAM); IPR012974 (PFAM); PTHR10894 (PANTHER); PTHR10894:SF0 (PANTHER); IPR002687 (PROSITE_PROFILES); SSF89124 (SUPERFAMILY)                                                                                                                                                                                                                                                                                                  |
| 1962 | 299150_length_1708_cvg_3.3_tip_1_5  | 80    | collagen alpha-1 chain                              | 569 | 1.43E-117 | 63.90% | 0.099 | IPR008160 (PFAM); PTHR24023 (PANTHER)                                                                                                                                                                                                                                                                                                                                                                                                                                                      |
| 1961 | 299150_length_1708_cvg_3.3_tip_1_0  | 80    | threonine-rich gpi-anchored glycoprotein            | 570 | 5.45E-60  | 43.60% | 0.114 | PTHR24023 (PANTHER); PTHR24023:SF405 (PANTHER)                                                                                                                                                                                                                                                                                                                                                                                                                                             |
| 1963 | 299168_length_1713_cvg_14.9_tip_1_1 | 365   | wd40 repeat-containing protein smu1                 | 571 | 0         | 93.80% | 0.099 | IPR020472 (PRINTS); IPR001680 (SMART); IPR006594 (SMART); IPR006595 (SMART); IPR001680 (PFAM); IPR015943 (G3DSA:2.130.10.GENE3D); PTHR22848 (PANTHER); IPR019775 (PROSITE_PATTERNS); IPR019775 (PROSITE_PATTERNS); IPR001680 (PROSITE_PROFILES); IPR001680 (PROSITE_PROFILES); IPR001680 (PROSITE_PROFILES); IPR006595 (PROSITE_PROFILES); IPR017986 (PROSITE_PROFILES); IPR001680 (PROSITE_PROFILES); IPR006594 (PROSITE_PROFILES); IPR001680 (PROSITE_PROFILES); IPR017986 (SUPERFAMILY) |
| 1964 | 299172_length_1713_cvg_11.4_tip_1_0 | 282   | estradiol 17-beta-dehydrogenase 2                   | 571 | 1.09E-71  | 56.80% | 0.123 | IPR002198 (PRINTS); IPR002347 (PRINTS); IPR002198 (PFAM); IPR016040 (G3DSA:3.40.50.GENE3D); PTHR24316 (PANTHER); PTHR24316:SF215 (PANTHER); CYTOPLASMIC_DOMAIN (PHOBIUS); TRANSMEMBRANE (PHOBIUS); CYTOPLASMIC_DOMAIN (PHOBIUS); NON_CYTOPLASMIC_DOMAIN (PHOBIUS); NON_CYTOPLASMIC_DOMAIN (PHOBIUS); TRANSMEMBRANE (PHOBIUS); TRANSMEMBRANE (PHOBIUS); SSF51735 (SUPERFAMILY); TMhelix (TMHMM); TMhelix (TMHMM)                                                                            |

|      |                                     |      |                                                        |     |           |        |       |                                                                                                                                                                                                                                                                                                                                                                                                                                                                                                                                                                    |
|------|-------------------------------------|------|--------------------------------------------------------|-----|-----------|--------|-------|--------------------------------------------------------------------------------------------------------------------------------------------------------------------------------------------------------------------------------------------------------------------------------------------------------------------------------------------------------------------------------------------------------------------------------------------------------------------------------------------------------------------------------------------------------------------|
| 1965 | 299190_length_1716_cvg_8.7_tip_1_4  | 178  | endothelin-converting enzyme 1                         | 572 | 8.76E-165 | 64.60% | 0.104 | IPR018497 (PRINTS); IPR024079 (G3DSA:3.40.390.GENE3D); IPR018497 (PFAM); IPR008753 (PFAM); IPR000718 (PANTHER); PTHR11733:SF111 (PANTHER); SSF55486 (SUPERFAMILY)                                                                                                                                                                                                                                                                                                                                                                                                  |
| 1966 | 299198_length_1719_cvg_10.0_tip_1_3 | 234  | peptidyl-prolyl cis-trans isomerase fkbp4-like         | 573 | 0         | 73.80% | 0.128 | Coil (COILS); IPR019734 (SMART); G3DSA:3.10.50.40 (GENE3D); IPR023114 (G3DSA:1.10.150.GENE3D); IPR001440 (PFAM); G3DSA:3.10.50.40 (GENE3D); IPR011990 (G3DSA:1.25.40.GENE3D); PF13414 (PFAM); IPR001179 (PFAM); IPR023566 (PANTHER); PTHR10516:SF274 (PANTHER); IPR001179 (PROSITE_PROFILES); IPR013026 (PROSITE_PROFILES); IPR019734 (PROSITE_PROFILES); IPR013026 (PROSITE_PROFILES); IPR019734 (PROSITE_PROFILES); IPR001179 (PROSITE_PROFILES); SSF54534 (SUPERFAMILY); SSF48452 (SUPERFAMILY); SSF54534 (SUPERFAMILY)                                         |
| 1967 | 299226_length_1723_cvg_77.9_tip_1_4 | 7659 | inactive pancreatic lipase-related protein 1           | 574 | 1.35E-88  | 56.80% | 0.133 | IPR002331 (PRINTS); IPR000734 (PRINTS); IPR001024 (G3DSA:2.60.60.GENE3D); IPR013818 (PFAM); IPR029058 (G3DSA:3.40.50.GENE3D); IPR000734 (PANTHER); TRANSMEMBRANE (PHOBIUS); NON_CYTOPLASMIC_DOMAIN (PHOBIUS); CYTOPLASMIC_DOMAIN (PHOBIUS); IPR029058 (SUPERFAMILY); IPR008976 (SUPERFAMILY)                                                                                                                                                                                                                                                                       |
| 1968 | 299278_length_1736_cvg_14.3_tip_1_2 | 330  | hydroxysteroid dehydrogenase-like protein 2            | 578 | 0         | 77.00% | 0.14  | IPR002347 (PRINTS); IPR016040 (G3DSA:3.40.50.GENE3D); IPR003033 (PFAM); IPR003033 (G3DSA:3.30.1050.GENE3D); IPR002198 (PFAM); PTHR24322 (PANTHER); PTHR24322:SF273 (PANTHER); IPR003033 (SUPERFAMILY); SSF51735 (SUPERFAMILY)                                                                                                                                                                                                                                                                                                                                      |
| 1969 | 299280_length_1736_cvg_8.9_tip_1_4  | 209  | cytochrome p450 2u1-like                               | 579 | 6.67E-124 | 57.40% | 0.107 | IPR002401 (PRINTS); IPR001128 (PRINTS); IPR001128 (G3DSA:1.10.630.GENE3D); IPR001128 (PFAM); PTHR24300 (PANTHER); IPR017972 (PROSITE_PATTERNS); NON_CYTOPLASMIC_DOMAIN (PHOBIUS); CYTOPLASMIC_DOMAIN (PHOBIUS); TRANSMEMBRANE (PHOBIUS); NON_CYTOPLASMIC_DOMAIN (PHOBIUS); TRANSMEMBRANE (PHOBIUS); TRANSMEMBRANE (PHOBIUS); CYTOPLASMIC_DOMAIN (PHOBIUS); IPR001128 (SUPERFAMILY); TMhelix (TMHMM); TMhelix (TMHMM); TMhelix (TMHMM)                                                                                                                              |
| 1970 | 299284_length_1736_cvg_56.0_tip_1_4 | 1575 | leucine-rich repeat neuronal protein 3-like isoform x1 | 579 | 3.06E-107 | 54.90% | 0.194 | IPR003591 (SMART); IPR000483 (SMART); G3DSA:3.80.10.10 (GENE3D); G3DSA:3.80.10.10 (GENE3D); IPR001611 (PFAM); IPR001611 (PFAM); PTHR24373 (PANTHER); TRANSMEMBRANE (PHOBIUS); TRANSMEMBRANE (PHOBIUS); CYTOPLASMIC_DOMAIN (PHOBIUS); NON_CYTOPLASMIC_DOMAIN (PHOBIUS); CYTOPLASMIC_DOMAIN (PHOBIUS); IPR001611 (PROSITE_PROFILES); IPR001611 (PROSITE_PROFILES); IPR001611 (PROSITE_PROFILES); IPR001611 (PROSITE_PROFILES); IPR001611 (PROSITE_PROFILES); IPR001611 (PROSITE_PROFILES); SSF52058 (SUPERFAMILY); TMhelix (TMHMM); TMhelix (TMHMM); TMhelix (TMHMM) |
| 1971 | 299310_length_1741_cvg_61.7_tip_1_5 | 1740 | heat shock protein 70                                  | 580 | 0         | 96.30% | 0.144 | Coil (COILS); IPR013126 (PRINTS); IPR029047 (G3DSA:2.60.34.GENE3D); G3DSA:3.30.30.30 (GENE3D); IPR013126 (PFAM); G3DSA:3.90.640.10 (GENE3D); G3DSA:3.30.420.40 (GENE3D); G3DSA:3.30.420.40 (GENE3D); PTHR19375 (PANTHER); PTHR19375:SF142 (PANTHER); IPR018181 (PROSITE_PATTERNS); IPR018181 (PROSITE_PATTERNS); IPR018181 (PROSITE_PATTERNS); SSF53067 (SUPERFAMILY); IPR029047 (SUPERFAMILY); SSF53067 (SUPERFAMILY)                                                                                                                                             |
| 1972 | 299338_length_1749_cvg_6.8_tip_1_5  | 139  | ribonuclease oy                                        | 583 | 1.94E-61  | 59.30% | 0.285 | IPR001568 (G3DSA:3.90.730.GENE3D); IPR001568 (PFAM); IPR001568 (PANTHER); IPR018188 (PROSITE_PATTERNS); CYTOPLASMIC_DOMAIN (PHOBIUS); TRANSMEMBRANE (PHOBIUS); NON_CYTOPLASMIC_DOMAIN (PHOBIUS); IPR001568 (SUPERFAMILY); TMhelix (TMHMM); TMhelix (TMHMM)                                                                                                                                                                                                                                                                                                         |
| 1973 | 299348_length_1752_cvg_54.9_tip_1_0 | 2174 | polyketide synthase type i                             | 584 | 6.23E-27  | 61.90% | 0.115 | IPR000436 (SMART); IPR000436 (PFAM); G3DSA:2.10.70.10 (GENE3D); G3DSA:2.10.70.10 (GENE3D); IPR000436 (PROSITE_PROFILES); IPR000436 (PROSITE_PROFILES); IPR000436 (SUPERFAMILY); IPR000436 (SUPERFAMILY)                                                                                                                                                                                                                                                                                                                                                            |
| 1974 | 299348_length_1752_cvg_54.9_tip_1_1 | 2174 | protein containing tetratricopeptide repeat            | 584 | 4.26E-07  | 76.00% | 0.186 | Coil (COILS); Coil (COILS); TRANSMEMBRANE (PHOBIUS); NON_CYTOPLASMIC_DOMAIN (PHOBIUS); CYTOPLASMIC_DOMAIN (PHOBIUS)                                                                                                                                                                                                                                                                                                                                                                                                                                                |



|      |                                     |      |                                                     |     |           |        |       |                                                                                                                                                                                                                                                                                                                                                                                                                                                                                                                                                                                                                                                                      |
|------|-------------------------------------|------|-----------------------------------------------------|-----|-----------|--------|-------|----------------------------------------------------------------------------------------------------------------------------------------------------------------------------------------------------------------------------------------------------------------------------------------------------------------------------------------------------------------------------------------------------------------------------------------------------------------------------------------------------------------------------------------------------------------------------------------------------------------------------------------------------------------------|
| 1983 | 299492_length_1778_cvg_8.6_tip_1_5  | 220  | calnexin                                            | 592 | 0         | 75.20% | 0.216 | Coil (COILS); IPR001580 (PRINTS); IPR013320 (G3DSA:2.60.120.GENE3D); IPR001580 (PFAM); IPR009033 (G3DSA:2.10.250.GENE3D); IPR009033 (G3DSA:2.10.250.GENE3D); PTHR11073:SF1 (PANTHER); IPR001580 (PANTHER); IPR018124 (PROSITE_PATTERNS); IPR018124 (PROSITE_PATTERNS); IPR018124 (PROSITE_PATTERNS); IPR018124 (PROSITE_PATTERNS); TRANSMEMBRANE (PHOBIUS); NON_CYTOPLASMIC_DOMAIN (PHOBIUS); CYTOPLASMIC_DOMAIN (PHOBIUS); IPR013320 (SUPERFAMILY); IPR009033 (SUPERFAMILY); TMhelix (TMHMM)                                                                                                                                                                        |
| 1982 | 299490_length_1778_cvg_6.1_tip_1_0  | 134  | von willebrand factor a domain-containing protein 8 | 593 | 0         | 73.10% | 0.169 | IPR027417 (G3DSA:3.40.50.GENE3D); IPR011704 (PFAM); PTHR21610:SF9 (PANTHER); PTHR21610 (PANTHER); IPR027417 (SUPERFAMILY); IPR027417 (SUPERFAMILY)                                                                                                                                                                                                                                                                                                                                                                                                                                                                                                                   |
| 1984 | 299494_length_1778_cvg_6.4_tip_1_4  | 201  | laminin subunit alpha                               | 593 | 2.29E-153 | 57.70% | 0.137 | IPR001791 (SMART); IPR013320 (G3DSA:2.60.120.GENE3D); IPR013320 (G3DSA:2.60.120.GENE3D); IPR001791 (PFAM); IPR013320 (G3DSA:2.60.120.GENE3D); PTHR10574:SF39 (PANTHER); PTHR10574 (PANTHER); IPR001791 (PROSITE_PROFILES); IPR001791 (PROSITE_PROFILES); IPR001791 (PROSITE_PROFILES); IPR013320 (SUPERFAMILY); IPR013320 (SUPERFAMILY); IPR013320 (SUPERFAMILY)                                                                                                                                                                                                                                                                                                     |
| 1986 | 299498_length_1779_cvg_11.0_tip_1_4 | 231  | dnaj homolog subfamily c member 7                   | 593 | 0         | 74.90% | 0.104 | IPR001623 (PRINTS); IPR001623 (SMART); IPR019734 (SMART); IPR001623 (PFAM); IPR013105 (PFAM); IPR001623 (G3DSA:1.10.287.GENE3D); IPR011990 (G3DSA:1.25.40.GENE3D); IPR011990 (G3DSA:1.25.40.GENE3D); PF13414 (PFAM); IPR019734 (PFAM); PTHR24078 (PANTHER); PTHR24078:SF140 (PANTHER); IPR018253 (PROSITE_PATTERNS); IPR013026 (PROSITE_PROFILES); IPR001623 (PROSITE_PROFILES); IPR019734 (PROSITE_PROFILES); IPR019734 (PROSITE_PROFILES); IPR019734 (PROSITE_PROFILES); IPR019734 (PROSITE_PROFILES); IPR019734 (PROSITE_PROFILES); IPR019734 (PROSITE_PROFILES); SSF48452 (SUPERFAMILY); IPR001623 (SUPERFAMILY); SSF48452 (SUPERFAMILY); SSF48452 (SUPERFAMILY) |
| 1987 | 299506_length_1781_cvg_5.8_tip_1_2  | 187  | latrophilin cir1-like isoform x7                    | 593 | 0         | 64.20% | 0.165 | IPR001879 (SMART); IPR000203 (SMART); IPR001879 (PFAM); IPR000922 (PFAM); IPR022624 (PFAM); IPR000832 (PFAM); IPR000203 (PFAM); PTHR12011:SF217 (PANTHER); PTHR12011 (PANTHER); CYTOPLASMIC_DOMAIN (PHOBIUS); NON_CYTOPLASMIC_DOMAIN (PHOBIUS); TRANSMEMBRANE (PHOBIUS); IPR000203 (PROSITE_PROFILES); IPR001879 (PROSITE_PROFILES); IPR000922 (PROSITE_PROFILES); SignalP-TM (SIGNALP_GRAM_POSITIVE); TMhelix (TMHMM)                                                                                                                                                                                                                                               |
| 1988 | 299508_length_1781_cvg_3.4_tip_1_2  | 86   | #NAME?                                              | 593 | 0         | 82.30% | 0.135 | IPR006589 (SMART); IPR006407 (PIRSF); IPR006047 (PFAM); IPR013781 (G3DSA:3.20.20.GENE3D); IPR013780 (G3DSA:2.60.40.GENE3D); IPR006048 (PFAM); IPR015902 (PANTHER); PTHR10357:SF110 (PANTHER); IPR017853 (SUPERFAMILY); SSF51011 (SUPERFAMILY)                                                                                                                                                                                                                                                                                                                                                                                                                        |
| 1989 | 299512_length_1781_cvg_14.2_tip_1_2 | 343  | af425264_1lysozyme precursor                        | 593 | 9.74E-37  | 65.30% | 0.102 | IPR001916 (PRINTS); IPR000974 (PRINTS); IPR001916 (SMART); G3DSA:1.10.530.10 (GENE3D); IPR001916 (PFAM); PTHR11407 (PANTHER); NON_CYTOPLASMIC_DOMAIN (PHOBIUS); TRANSMEMBRANE (PHOBIUS); TRANSMEMBRANE (PHOBIUS); NON_CYTOPLASMIC_DOMAIN (PHOBIUS); CYTOPLASMIC_DOMAIN (PHOBIUS); TRANSMEMBRANE (PHOBIUS); TRANSMEMBRANE (PHOBIUS); NON_CYTOPLASMIC_DOMAIN (PHOBIUS); IPR001916 (PROSITE_PROFILES); IPR023346 (SUPERFAMILY); TMhelix (TMHMM); TMhelix (TMHMM); TMhelix (TMHMM); TMhelix (TMHMM)                                                                                                                                                                      |
| 2009 | 299742_length_1828_cvg_72.7_tip_1_2 | 8741 | retinal dehydrogenase 1-like                        | 593 | 0         | 82.10% | 0.121 | IPR016163 (G3DSA:3.40.309.GENE3D); IPR016162 (G3DSA:3.40.605.GENE3D); IPR015590 (PFAM); PTHR11699 (PANTHER); PTHR11699:SF145 (PANTHER); IPR016160 (PROSITE_PATTERNS); IPR029510 (PROSITE_PATTERNS); IPR016161 (SUPERFAMILY)                                                                                                                                                                                                                                                                                                                                                                                                                                          |
| 1990 | 299518_length_1782_cvg_38.4_tip_1_5 | 964  | 5 -nucleotidase-like                                | 594 | 8.53E-87  | 56.50% | 0.133 | IPR006179 (PRINTS); IPR029052 (G3DSA:3.60.21.GENE3D); IPR008334 (G3DSA:3.90.780.GENE3D); IPR008334 (PFAM); IPR006179 (PANTHER); PTHR11575:SF21 (PANTHER); IPR029052 (SUPERFAMILY); IPR008334 (SUPERFAMILY)                                                                                                                                                                                                                                                                                                                                                                                                                                                           |
| 1991 | 299526_length_1784_cvg_36.1_tip_1_0 | 788  | phosphatidylethanolamine-binding protein            | 595 | 4.63E-88  | 79.90% | 0.168 | IPR008914 (PFAM); IPR008914 (G3DSA:3.90.280.GENE3D); PTHR11362 (PANTHER); IPR008914 (SUPERFAMILY)                                                                                                                                                                                                                                                                                                                                                                                                                                                                                                                                                                    |



|      |                                     |      |                                                                     |     |           |        |       |                                                                                                                                                                                                                                                                                                                                                                                                                                                                                                                                                                                                                                                                                                                                                    |
|------|-------------------------------------|------|---------------------------------------------------------------------|-----|-----------|--------|-------|----------------------------------------------------------------------------------------------------------------------------------------------------------------------------------------------------------------------------------------------------------------------------------------------------------------------------------------------------------------------------------------------------------------------------------------------------------------------------------------------------------------------------------------------------------------------------------------------------------------------------------------------------------------------------------------------------------------------------------------------------|
| 1992 | 299550_length_1788_cvg_6.8_tip_1_5  | 190  | cadherin-like membrane protein                                      | 596 | 1.92E-51  | 45.70% | 0.102 | IPR002126 (PRINTS); IPR002126 (SMART); IPR002126 (PFAM); IPR002126 (G3DSA:2.60.40.GENE3D); IPR002126 (G3DSA:2.60.40.GENE3D); IPR002126 (G3DSA:2.60.40.GENE3D); PTHR24027 (PANTHER); IPR020894 (PROSITE_PATTERNS); IPR020894 (PROSITE_PATTERNS); IPR002126 (PROSITE_PROFILES); IPR002126 (PROSITE_PROFILES); IPR002126 (PROSITE_PROFILES); IPR002126 (PROSITE_PROFILES); IPR015919 (SUPERFAMILY); IPR015919 (SUPERFAMILY); IPR015919 (SUPERFAMILY); IPR015919 (SUPERFAMILY)                                                                                                                                                                                                                                                                         |
| 1993 | 299552_length_1788_cvg_35.8_tip_1_5 | 777  | proclotting enzyme                                                  | 596 | 6.25E-132 | 64.00% | 0.205 | IPR001314 (PRINTS); IPR006604 (SMART); IPR001254 (SMART); G3DSA:2.40.10.10 (GENE3D); IPR001254 (PFAM); G3DSA:2.40.10.10 (GENE3D); PTHR24268 (PANTHER); PTHR24268:SF81 (PANTHER); IPR018114 (PROSITE_PATTERNS); IPR018114 (PROSITE_PATTERNS); TRANSMEMBRANE (PHOBIUS); NON_CYTOPLASMIC_DOMAIN (PHOBIUS); CYTOPLASMIC_DOMAIN (PHOBIUS); IPR001254 (PROSITE_PROFILES); IPR009003 (SUPERFAMILY); TMhelix (TMHMM)                                                                                                                                                                                                                                                                                                                                       |
| 1994 | 299558_length_1789_cvg_6.8_tip_1_1  | 186  | membrane metallo-endopeptidase-like 1-like                          | 596 | 8.92E-64  | 47.70% | 0.171 | IPR018497 (PRINTS); IPR018497 (PFAM); IPR008753 (PFAM); IPR024079 (G3DSA:3.40.390.GENE3D); IPR000718 (PANTHER); SSF55486 (SUPERFAMILY)                                                                                                                                                                                                                                                                                                                                                                                                                                                                                                                                                                                                             |
| 2010 | 299780_length_1832_cvg_30.9_tip_1_1 | 870  | microneme protein mic12                                             | 596 | 7.97E-20  | 38.80% | 0.104 | IPR000742 (SMART); IPR001881 (SMART); G3DSA:2.10.25.10 (GENE3D); G3DSA:2.10.25.10 (GENE3D); IPR001881 (PFAM); G3DSA:2.10.25.10 (GENE3D); G3DSA:2.10.25.10 (GENE3D); G3DSA:2.10.25.10 (GENE3D); PTHR24034 (PANTHER); PTHR24034:SF33 (PANTHER); IPR013032 (PROSITE_PATTERNS); IPR000152 (PROSITE_PATTERNS); IPR013032 (PROSITE_PATTERNS); IPR000152 (PROSITE_PATTERNS); IPR013032 (PROSITE_PATTERNS); IPR013032 (PROSITE_PATTERNS); IPR000152 (PROSITE_PATTERNS); CYTOPLASMIC_DOMAIN (PHOBIUS); TRANSMEMBRANE (PHOBIUS); NON_CYTOPLASMIC_DOMAIN (PHOBIUS); IPR000742 (PROSITE_PROFILES); IPR000742 (PROSITE_PROFILES); IPR000742 (PROSITE_PROFILES); IPR000742 (PROSITE_PROFILES); IPR009030 (SUPERFAMILY); IPR009030 (SUPERFAMILY); TMhelix (TMHMM) |
| 1995 | 299566_length_1792_cvg_64.5_tip_1_3 | 2653 | preamyase 1                                                         | 598 | 0         | 76.60% | 0.274 | IPR006046 (PRINTS); IPR006048 (SMART); IPR006589 (SMART); IPR006048 (PFAM); IPR006047 (PFAM); IPR013781 (G3DSA:3.20.20.GENE3D); IPR013780 (G3DSA:2.60.40.GENE3D); PTHR10357:SF116 (PANTHER); IPR015902 (PANTHER); IPR017853 (SUPERFAMILY); SSF51011 (SUPERFAMILY); TMhelix (TMHMM)                                                                                                                                                                                                                                                                                                                                                                                                                                                                 |
| 1996 | 299568_length_1793_cvg_5.1_tip_1_3  | 119  | low quality protein: cubilin                                        | 598 | 2.53E-38  | 47.10% | 0.112 | IPR000859 (SMART); IPR002035 (G3DSA:3.40.50.GENE3D); IPR000859 (G3DSA:2.60.120.GENE3D); IPR000859 (PFAM); IPR002035 (PFAM); IPR000859 (G3DSA:2.60.120.GENE3D); PTHR10127 (PANTHER); IPR000859 (PROSITE_PROFILES); IPR000859 (PROSITE_PROFILES); IPR000859 (PROSITE_PROFILES); IPR002035 (PROSITE_PROFILES); IPR000859 (SUPERFAMILY); IPR000859 (SUPERFAMILY); IPR002035 (SUPERFAMILY); IPR000859 (SUPERFAMILY)                                                                                                                                                                                                                                                                                                                                     |
| 1997 | 299572_length_1794_cvg_57.9_tip_1_3 | 3474 | trypsinogen 2                                                       | 598 | 1.54E-66  | 61.80% | 0.117 | IPR001314 (PRINTS); IPR001254 (SMART); G3DSA:2.40.10.10 (GENE3D); IPR001254 (PFAM); G3DSA:2.40.10.10 (GENE3D); G3DSA:2.40.10.10 (GENE3D); PTHR24265 (PANTHER); IPR018114 (PROSITE_PATTERNS); IPR018114 (PROSITE_PATTERNS); NON_CYTOPLASMIC_DOMAIN (PHOBIUS); TRANSMEMBRANE (PHOBIUS); CYTOPLASMIC_DOMAIN (PHOBIUS); IPR001254 (PROSITE_PROFILES); IPR009003 (SUPERFAMILY); TMhelix (TMHMM)                                                                                                                                                                                                                                                                                                                                                         |
| 1998 | 299580_length_1795_cvg_19.6_tip_1_1 | 623  | serpin 3                                                            | 598 | 2.83E-82  | 58.90% | 0.147 | IPR023796 (SMART); G3DSA:3.30.497.10 (GENE3D); G3DSA:2.30.39.10 (GENE3D); IPR023796 (PFAM); IPR000215 (PANTHER); PTHR11461:SF52 (PANTHER); IPR023795 (PROSITE_PATTERNS); TRANSMEMBRANE (PHOBIUS); CYTOPLASMIC_DOMAIN (PHOBIUS); NON_CYTOPLASMIC_DOMAIN (PHOBIUS); IPR023796 (SUPERFAMILY); TMhelix (TMHMM)                                                                                                                                                                                                                                                                                                                                                                                                                                         |
| 1999 | 299604_length_1800_cvg_7.9_tip_1_3  | 172  | letm1 and ef-hand domain-containing protein anon-mitochondrial-like | 600 | 2.58E-105 | 58.30% | 0.205 | Coil (COILS); Coil (COILS); Coil (COILS); Coil (COILS); Coil (COILS); IPR011685 (PFAM); IPR011992 (G3DSA:1.10.238.GENE3D); PTHR14009:SF1 (PANTHER); PTHR14009 (PANTHER); IPR002048 (PROSITE_PROFILES); SSF47473 (SUPERFAMILY)                                                                                                                                                                                                                                                                                                                                                                                                                                                                                                                      |
| 2000 | 299628_length_1806_cvg_9.5_tip_1_4  | 232  | alkaline phosphatase 4-like                                         | 602 | 4.79E-160 | 64.00% | 0.243 | IPR001952 (PRINTS); IPR001952 (SMART); IPR001952 (PFAM); IPR017849 (G3DSA:3.40.720.GENE3D); PTHR11596 (PANTHER); IPR018299 (PROSITE_PATTERNS); NON_CYTOPLASMIC_DOMAIN (PHOBIUS); TRANSMEMBRANE (PHOBIUS); CYTOPLASMIC_DOMAIN (PHOBIUS); SignalP-TM (SIGNALP_GRAM_POSITIVE); IPR017850 (SUPERFAMILY); TMhelix (TMHMM)                                                                                                                                                                                                                                                                                                                                                                                                                               |

|      |                                     |      |                                                  |     |           |        |         |                                                                                                                                                                                                                                                                                                                                                                                                                                                                                                                       |
|------|-------------------------------------|------|--------------------------------------------------|-----|-----------|--------|---------|-----------------------------------------------------------------------------------------------------------------------------------------------------------------------------------------------------------------------------------------------------------------------------------------------------------------------------------------------------------------------------------------------------------------------------------------------------------------------------------------------------------------------|
| 2001 | 299636_length_1808_cvg_16.5_tip_0_2 | 429  | fibrinogen-like protein 1                        | 602 | 2.23E-23  | 63.00% | 0.114   | IPR002181 (SMART); IPR002181 (PFAM); IPR014715 (G3DSA:4.10.530.GENE3D); PTHR19143 (PANTHER); IPR020837 (PROSITE_PATTERNS); CYTOPLASMIC_DOMAIN (PHOBIUS); TRANSMEMBRANE (PHOBIUS); TRANSMEMBRANE (PHOBIUS); NON_CYTOPLASMIC_DOMAIN (PHOBIUS); TRANSMEMBRANE (PHOBIUS); CYTOPLASMIC_DOMAIN (PHOBIUS); NON_CYTOPLASMIC_DOMAIN (PHOBIUS); IPR002181 (PROSITE_PROFILES); IPR002181 (SUPERFAMILY)                                                                                                                           |
| 2002 | 299640_length_1809_cvg_9.1_tip_1_2  | 220  | leucine-rich repeat-containing protein 59        | 603 | 9.09E-63  | 65.50% | 0.119   | Coil (COILS); Coil (COILS); IPR003591 (SMART); IPR001611 (PFAM); G3DSA:3.80.10.10 (GENE3D); PTHR23155 (PANTHER); CYTOPLASMIC_DOMAIN (PHOBIUS); NON_CYTOPLASMIC_DOMAIN (PHOBIUS); TRANSMEMBRANE (PHOBIUS); CYTOPLASMIC_DOMAIN (PHOBIUS); TRANSMEMBRANE (PHOBIUS); NON_CYTOPLASMIC_DOMAIN (PHOBIUS); TRANSMEMBRANE (PHOBIUS); IPR001611 (PROSITE_PROFILES); IPR001611 (PROSITE_PROFILES); IPR001611 (PROSITE_PROFILES); SSF52058 (SUPERFAMILY); TMhelix (TMHMM); TMhelix (TMHMM)                                        |
| 2003 | 299642_length_1810_cvg_8.1_tip_1_0  | 186  | tyrosine-protein phosphatase lar-like isoform x6 | 604 | 0         | 93.00% | 0.113   | IPR000242 (PRINTS); IPR000242 (SMART); IPR003595 (SMART); IPR000242 (PFAM); IPR029021 (G3DSA:3.90.190.GENE3D); IPR029021 (G3DSA:3.90.190.GENE3D); PTHR19134 (PANTHER); PTHR19134:SF199 (PANTHER); IPR016130 (PROSITE_PATTERNS); IPR016130 (PROSITE_PATTERNS); IPR000387 (PROSITE_PROFILES); IPR000242 (PROSITE_PROFILES); IPR000387 (PROSITE_PROFILES); IPR000242 (PROSITE_PROFILES); IPR029021 (SUPERFAMILY); IPR029021 (SUPERFAMILY)                                                                                |
| 2004 | 299676_length_1815_cvg_38.1_tip_1_2 | 1177 | peptidyl-prolyl cis-trans isomerase b            | 605 | 7.72E-108 | 86.30% | 0.508 Y | IPR002130 (PRINTS); IPR002130 (PFAM); IPR029000 (G3DSA:2.40.100.GENE3D); IPR024936 (PANTHER); PTHR11071:SF63 (PANTHER); IPR020892 (PROSITE_PATTERNS); NON_CYTOPLASMIC_DOMAIN (PHOBIUS); TRANSMEMBRANE (PHOBIUS); NON_CYTOPLASMIC_DOMAIN (PHOBIUS); TRANSMEMBRANE (PHOBIUS); CYTOPLASMIC_DOMAIN (PHOBIUS); IPR002130 (PROSITE_PROFILES); SignalP-TM (SIGNALP_EUK); IPR029000 (SUPERFAMILY)                                                                                                                             |
| 2005 | 299692_length_1818_cvg_15.5_tip_1_2 | 331  | rna-binding protein 5-like                       | 606 | 5.23E-153 | 64.30% | 0.146   | Coil (COILS); IPR000467 (SMART); IPR000467 (PFAM); PTHR13948 (PANTHER); NON_CYTOPLASMIC_DOMAIN (PHOBIUS); CYTOPLASMIC_DOMAIN (PHOBIUS); TRANSMEMBRANE (PHOBIUS); IPR000467 (PROSITE_PROFILES); IPR007087 (PROSITE_PROFILES)                                                                                                                                                                                                                                                                                           |
| 2006 | 299710_length_1822_cvg_43.2_tip_1_2 | 834  | universal minicircle sequence binding protein    | 607 | 8.97E-27  | 51.50% | 0.183   | IPR001878 (SMART); IPR001878 (G3DSA:4.10.60.GENE3D); IPR001878 (G3DSA:4.10.60.GENE3D); IPR001878 (PFAM); PTHR23002 (PANTHER); NON_CYTOPLASMIC_DOMAIN (PHOBIUS); CYTOPLASMIC_DOMAIN (PHOBIUS); NON_CYTOPLASMIC_DOMAIN (PHOBIUS); TRANSMEMBRANE (PHOBIUS); TRANSMEMBRANE (PHOBIUS); IPR001878 (PROSITE_PROFILES); IPR001878 (PROSITE_PROFILES); IPR001878 (PROSITE_PROFILES); IPR001878 (PROSITE_PROFILES); IPR001878 (SUPERFAMILY); IPR001878 (SUPERFAMILY); IPR001878 (SUPERFAMILY); TMhelix (TMHMM); TMhelix (TMHMM) |
| 2007 | 299718_length_1823_cvg_15.1_tip_1_1 | 432  | allene oxide synthase-lipoxygenase               | 608 | 0         | 68.80% | 0.109   | Coil (COILS); IPR013819 (PRINTS); IPR013819 (PFAM); G3DSA:1.20.245.10 (GENE3D); PTHR11771:SF43 (PANTHER); IPR000907 (PANTHER); IPR020834 (PROSITE_PATTERNS); IPR013819 (PROSITE_PROFILES); IPR013819 (SUPERFAMILY)                                                                                                                                                                                                                                                                                                    |
| 2016 | 299824_length_1841_cvg_41.0_tip_1_3 | 2244 | orckinin precursor                               | 609 | 2.79E-21  | 77.70% | 0.241   | no IPS match                                                                                                                                                                                                                                                                                                                                                                                                                                                                                                          |
| 2017 | 299824_length_1841_cvg_41.0_tip_1_4 | 2244 | pedal peptide 2 precursor                        | 609 | 5.82E-39  | 59.50% | 0.25    | no IPS match                                                                                                                                                                                                                                                                                                                                                                                                                                                                                                          |
| 2008 | 299740_length_1828_cvg_9.1_tip_1_0  | 245  | cytochrome p450 3a24-like                        | 610 | 6.96E-111 | 58.70% | 0.141   | IPR002401 (PRINTS); IPR001128 (PRINTS); IPR001128 (G3DSA:1.10.630.GENE3D); IPR001128 (PFAM); PTHR24302 (PANTHER); PTHR24302:SF7 (PANTHER); IPR017972 (PROSITE_PATTERNS); CYTOPLASMIC_DOMAIN (PHOBIUS); TRANSMEMBRANE (PHOBIUS); NON_CYTOPLASMIC_DOMAIN (PHOBIUS); CYTOPLASMIC_DOMAIN (PHOBIUS); TRANSMEMBRANE (PHOBIUS); TRANSMEMBRANE (PHOBIUS); NON_CYTOPLASMIC_DOMAIN (PHOBIUS); IPR001128 (SUPERFAMILY); TMhelix (TMHMM); TMhelix (TMHMM); TMhelix (TMHMM)                                                        |

|      |                                     |     |                                                                       |     |           |        |         |                                                                                                                                                                                                                                                                                                                                                                                                                                                                                                                                                        |
|------|-------------------------------------|-----|-----------------------------------------------------------------------|-----|-----------|--------|---------|--------------------------------------------------------------------------------------------------------------------------------------------------------------------------------------------------------------------------------------------------------------------------------------------------------------------------------------------------------------------------------------------------------------------------------------------------------------------------------------------------------------------------------------------------------|
| 2011 | 299806_length_1839_cvg_6.9_tip_1_3  | 151 | apical endosomal glyco                                                | 613 | 3.60E-14  | 39.00% | 0.107   | IPR000998 (SMART); IPR000859 (SMART); IPR002172 (SMART); IPR000998 (PFAM); IPR000859 (PFAM); IPR002172 (PFAM); IPR002172 (G3DSA:4.10.400.GENE3D); IPR000859 (G3DSA:2.60.120.GENE3D); PTHR22991 (PANTHER); PTHR22991:SF23 (PANTHER); IPR000998 (PROSITE_PROFILES); IPR002172 (PROSITE_PROFILES); IPR000998 (PROSITE_PROFILES); IPR000859 (PROSITE_PROFILES); IPR013320 (SUPERFAMILY); IPR013320 (SUPERFAMILY); IPR000859 (SUPERFAMILY); IPR002172 (SUPERFAMILY)                                                                                         |
| 2012 | 299808_length_1839_cvg_9.2_tip_1_4  | 223 | inter-alpha-trypsin inhibitor heavy chain h3-like                     | 613 | 1.89E-121 | 62.70% | 0.138   | Coil (COILS); IPR002035 (SMART); IPR013694 (SMART); IPR002035 (PFAM); IPR002035 (G3DSA:3.40.50.GENE3D); IPR013694 (PFAM); PTHR10338 (PANTHER); PTHR10338:SF108 (PANTHER); NON_CYTOPLASMIC_DOMAIN (PHOBIUS); TRANSMEMBRANE (PHOBIUS); CYTOPLASMIC_DOMAIN (PHOBIUS); IPR002035 (PROSITE_PROFILES); IPR013694 (PROSITE_PROFILES); IPR002035 (SUPERFAMILY); TMhelix (TMHMM)                                                                                                                                                                                |
| 2013 | 299814_length_1840_cvg_5.4_tip_1_2  | 125 | maguk p55 subfamily member 6                                          | 613 | 0         | 85.80% | 0.104   | IPR008145 (SMART); IPR027417 (G3DSA:3.40.50.GENE3D); G3DSA:3.30.63.10 (GENE3D); G3DSA:2.30.30.40 (GENE3D); IPR001452 (PFAM); IPR008145 (PFAM); PTHR23122 (PANTHER); IPR020590 (PROSITE_PATTERNS); TRANSMEMBRANE (PHOBIUS); NON_CYTOPLASMIC_DOMAIN (PHOBIUS); CYTOPLASMIC_DOMAIN (PHOBIUS); IPR001452 (PROSITE_PROFILES); IPR008144 (PROSITE_PROFILES); IPR001452 (SUPERFAMILY); IPR027417 (SUPERFAMILY)                                                                                                                                                |
| 2014 | 299818_length_1841_cvg_19.9_tip_1_1 | 402 | chromodomain-helicase-dna-binding protein mi-2 homolog isoform x5     | 614 | 0         | 76.80% | 0.14    | Coil (COILS); Coil (COILS); IPR009462 (PFAM); IPR012957 (PFAM); IPR028727 (PTHR10799:PANTHER); PTHR10799 (PANTHER)                                                                                                                                                                                                                                                                                                                                                                                                                                     |
| 2015 | 299820_length_1841_cvg_9.0_tip_1_1  | 231 | alpha-mannosidase 2                                                   | 614 | 7.42E-110 | 58.20% | 0.17    | G3DSA:2.70.98.30 (GENE3D); IPR011682 (PFAM); IPR013780 (G3DSA:2.60.40.GENE3D); PTHR11607 (PANTHER); PTHR11607:SF4 (PANTHER); TRANSMEMBRANE (PHOBIUS); CYTOPLASMIC_DOMAIN (PHOBIUS); NON_CYTOPLASMIC_DOMAIN (PHOBIUS); IPR011013 (SUPERFAMILY); TMhelix (TMHMM)                                                                                                                                                                                                                                                                                         |
| 2033 | 300028_length_1886_cvg_5.0_tip_1_4  | 129 | n-sulphoglucosamine sulphohydrolase-like                              | 614 | 0         | 79.40% | 0.101   | Coil (COILS); IPR017849 (G3DSA:3.40.720.GENE3D); G3DSA:3.30.1120.10 (GENE3D); IPR000917 (PFAM); PTHR10342 (PANTHER); PTHR10342:SF76 (PANTHER); TRANSMEMBRANE (PHOBIUS); TRANSMEMBRANE (PHOBIUS); CYTOPLASMIC_DOMAIN (PHOBIUS); CYTOPLASMIC_DOMAIN (PHOBIUS); NON_CYTOPLASMIC_DOMAIN (PHOBIUS); NON_CYTOPLASMIC_DOMAIN (PHOBIUS); TRANSMEMBRANE (PHOBIUS); IPR017850 (SUPERFAMILY)                                                                                                                                                                      |
| 2018 | 299840_length_1843_cvg_8.4_tip_1_0  | 267 | sorbin and sh3 domain-containing protein partial                      | 615 | 0         | 77.80% | 0.106   | Coil (COILS); PR00499 (PRINTS); IPR001452 (PRINTS); IPR001452 (SMART); G3DSA:2.30.30.40 (GENE3D); IPR001452 (PFAM); IPR001452 (PFAM); G3DSA:2.30.30.40 (GENE3D); G3DSA:2.30.30.40 (GENE3D); PTHR10661 (PANTHER); PTHR10661:SF66 (PANTHER); IPR001452 (PROSITE_PROFILES); IPR001452 (PROSITE_PROFILES); IPR001452 (PROSITE_PROFILES); IPR001452 (SUPERFAMILY); IPR001452 (SUPERFAMILY); IPR001452 (SUPERFAMILY)                                                                                                                                         |
| 2019 | 299856_length_1847_cvg_8.6_tip_1_0  | 185 | ankyrin sam and basic leucine zipper domain-containing protein 1-like | 616 | 1.49E-130 | 61.00% | 0.099   | IPR001660 (SMART); IPR002110 (SMART); IPR020683 (G3DSA:1.25.40.GENE3D); IPR020683 (PFAM); IPR021129 (PFAM); IPR013761 (G3DSA:1.10.150.GENE3D); PTHR24157 (PANTHER); IPR002110 (PROSITE_PROFILES); IPR020683 (PROSITE_PROFILES); IPR002110 (PROSITE_PROFILES); IPR002110 (PROSITE_PROFILES); IPR001660 (PROSITE_PROFILES); IPR013761 (SUPERFAMILY); IPR020683 (SUPERFAMILY)                                                                                                                                                                             |
| 2020 | 299868_length_1850_cvg_12.7_tip_1_2 | 306 | pancreatic lipase-related protein 2-like                              | 616 | 8.35E-157 | 64.60% | 0.142   | IPR002331 (PRINTS); IPR000734 (PRINTS); IPR029058 (G3DSA:3.40.50.GENE3D); IPR013818 (PFAM); IPR001024 (G3DSA:2.60.60.GENE3D); PTHR11610:SF83 (PANTHER); IPR000734 (PANTHER); IPR001024 (PROSITE_PROFILES); IPR029058 (SUPERFAMILY); IPR008976 (SUPERFAMILY)                                                                                                                                                                                                                                                                                            |
| 2021 | 299874_length_1852_cvg_17.7_tip_1_2 | 538 | cathepsin l-like                                                      | 617 | 5.21E-166 | 79.60% | 0.131   | IPR000668 (PRINTS); IPR000668 (SMART); IPR013201 (SMART); G3DSA:3.90.70.10 (GENE3D); IPR013201 (PFAM); IPR000668 (PFAM); PTHR12411:SF57 (PANTHER); IPR013128 (PANTHER); IPR025660 (PROSITE_PATTERNS); IPR000169 (PROSITE_PATTERNS); IPR025661 (PROSITE_PATTERNS); NON_CYTOPLASMIC_DOMAIN (PHOBIUS); TRANSMEMBRANE (PHOBIUS); TRANSMEMBRANE (PHOBIUS); TRANSMEMBRANE (PHOBIUS); CYTOPLASMIC_DOMAIN (PHOBIUS); NON_CYTOPLASMIC_DOMAIN (PHOBIUS); CYTOPLASMIC_DOMAIN (PHOBIUS); SSF54001 (SUPERFAMILY); TMhelix (TMHMM); TMhelix (TMHMM); TMhelix (TMHMM) |
| 2022 | 299898_length_1857_cvg_3.6_tip_1_4  | 102 | mitochondrial import inner membrane translocase subunit tim8 a        | 619 | 3.34E-30  | 82.20% | 0.449 Y | IPR004217 (G3DSA:1.10.287.GENE3D); IPR004217 (PFAM); PTHR21535 (PANTHER); IPR004217 (SUPERFAMILY)                                                                                                                                                                                                                                                                                                                                                                                                                                                      |

|      |                                     |      |                                                                  |     |           |        |       |                                                                                                                                                                                                                                                                                                                                                                                                                                                                                                                                                                                                                                                                                                                                                              |
|------|-------------------------------------|------|------------------------------------------------------------------|-----|-----------|--------|-------|--------------------------------------------------------------------------------------------------------------------------------------------------------------------------------------------------------------------------------------------------------------------------------------------------------------------------------------------------------------------------------------------------------------------------------------------------------------------------------------------------------------------------------------------------------------------------------------------------------------------------------------------------------------------------------------------------------------------------------------------------------------|
| 2023 | 299902_length_1857_cvg_10.1_tip_1_1 | 196  | ectonucleotide pyrophosphatase phosphodiesterase family member 6 | 619 | 3.86E-108 | 54.60% | 0.106 | IPR002591 (PFAM); IPR017849 (G3DSA:3.40.720.GENE3D); IPR024873 (PANTHER); TRANSMEMBRANE (PHOBIUS); CYTOPLASMIC_DOMAIN (PHOBIUS); NON_CYTOPLASMIC_DOMAIN (PHOBIUS); IPR017850 (SUPERFAMILY)                                                                                                                                                                                                                                                                                                                                                                                                                                                                                                                                                                   |
| 2024 | 299918_length_1862_cvg_5.9_tip_1_1  | 131  | neurexin-4 isoform x3                                            | 621 | 0         | 64.10% | 0.129 | IPR001791 (SMART); IPR000742 (SMART); IPR013320 (G3DSA:2.60.120.GENE3D); G3DSA:2.10.25.10 (GENE3D); IPR013320 (G3DSA:2.60.120.GENE3D); IPR000742 (PFAM); IPR001791 (PFAM); PTHR10127:SF346 (PANTHER); PTHR10127 (PANTHER); IPR000742 (PROSITE_PROFILES); IPR001791 (PROSITE_PROFILES); IPR001791 (PROSITE_PROFILES); IPR000742 (PROSITE_PROFILES); IPR013320 (SUPERFAMILY); IPR013320 (SUPERFAMILY); IPR013320 (SUPERFAMILY)                                                                                                                                                                                                                                                                                                                                 |
| 2025 | 299924_length_1863_cvg_29.1_tip_1_1 | 862  | iron zinc purple acid phosphatase-like protein                   | 621 | 0         | 74.40% | 0.238 | IPR029052 (G3DSA:3.60.21.GENE3D); IPR025733 (PFAM); IPR015914 (G3DSA:2.60.40.GENE3D); IPR004843 (PFAM); PTHR22953 (PANTHER); PTHR22953:SF9 (PANTHER); TRANSMEMBRANE (PHOBIUS); CYTOPLASMIC_DOMAIN (PHOBIUS); NON_CYTOPLASMIC_DOMAIN (PHOBIUS); TRANSMEMBRANE (PHOBIUS); CYTOPLASMIC_DOMAIN (PHOBIUS); IPR029052 (SUPERFAMILY); IPR008963 (SUPERFAMILY); TMhelix (TMHMM)                                                                                                                                                                                                                                                                                                                                                                                      |
| 2026 | 299934_length_1865_cvg_59.4_tip_0_4 | 3385 | kielin chordin-like protein                                      | 622 | 9.00E-58  | 52.60% | 0.117 | IPR002223 (PRINTS); IPR002223 (SMART); IPR002223 (G3DSA:4.10.410.GENE3D); IPR002223 (PFAM); IPR008037 (PFAM); PTHR10083 (PANTHER); IPR020901 (PROSITE_PATTERNS); IPR002223 (PROSITE_PROFILES); IPR020862 (PROSITE_PROFILES); IPR020862 (PROSITE_PROFILES); IPR002223 (PROSITE_PROFILES); IPR008037 (SUPERFAMILY); IPR008037 (SUPERFAMILY); IPR002223 (SUPERFAMILY); IPR002223 (SUPERFAMILY)                                                                                                                                                                                                                                                                                                                                                                  |
| 2027 | 299948_length_1868_cvg_27.4_tip_1_2 | 655  | mitochondrial-processing peptidase subunit beta                  | 622 | 0         | 85.90% | 0.111 | IPR011765 (PFAM); IPR011237 (G3DSA:3.30.830.GENE3D); IPR007863 (PFAM); IPR011237 (G3DSA:3.30.830.GENE3D); PTHR11851:SF103 (PANTHER); PTHR11851 (PANTHER); IPR001431 (PROSITE_PATTERNS); IPR011249 (SUPERFAMILY); IPR011249 (SUPERFAMILY)                                                                                                                                                                                                                                                                                                                                                                                                                                                                                                                     |
| 2028 | 299954_length_1868_cvg_53.6_tip_1_5 | 1840 | ectonucleotide pyrophosphatase phosphodiesterase family member 6 | 622 | 4.96E-98  | 54.90% | 0.245 | IPR017849 (G3DSA:3.40.720.GENE3D); IPR002591 (PFAM); IPR024873 (PANTHER); SIGNAL_PEPTIDE (PHOBIUS); TRANSMEMBRANE (PHOBIUS); CYTOPLASMIC_DOMAIN (PHOBIUS); NON_CYTOPLASMIC_DOMAIN (PHOBIUS); TRANSMEMBRANE (PHOBIUS); SIGNAL_PEPTIDE_H_REGION (PHOBIUS); TRANSMEMBRANE (PHOBIUS); CYTOPLASMIC_DOMAIN (PHOBIUS); SIGNAL_PEPTIDE_N_REGION (PHOBIUS); SIGNAL_PEPTIDE_C_REGION (PHOBIUS); IPR017850 (SUPERFAMILY); TMhelix (TMHMM); TMhelix (TMHMM); TMhelix (TMHMM)                                                                                                                                                                                                                                                                                             |
| 2031 | 299994_length_1877_cvg_37.8_tip_1_5 | 1108 | superoxide dismutase                                             | 625 | 1.62E-45  | 67.20% | 0.149 | IPR001424 (PRINTS); IPR001424 (G3DSA:2.60.40.GENE3D); IPR001424 (PFAM); PTHR10003 (PANTHER); IPR018152 (PROSITE_PATTERNS); IPR018152 (PROSITE_PATTERNS); TRANSMEMBRANE (PHOBIUS); TRANSMEMBRANE (PHOBIUS); TRANSMEMBRANE (PHOBIUS); NON_CYTOPLASMIC_DOMAIN (PHOBIUS); NON_CYTOPLASMIC_DOMAIN (PHOBIUS); CYTOPLASMIC_DOMAIN (PHOBIUS); IPR001424 (SUPERFAMILY)                                                                                                                                                                                                                                                                                                                                                                                                |
| 2032 | 299996_length_1877_cvg_3.6_tip_1_5  | 123  | homeotic protein spalt-major-like isoform x2                     | 625 | 1.93E-118 | 63.60% | 0.325 | IPR015880 (SMART); PF13465 (PFAM); IPR013087 (G3DSA:3.30.160.GENE3D); IPR013087 (G3DSA:3.30.160.GENE3D); PTHR23233:SF51 (PANTHER); PTHR23233 (PANTHER); IPR007087 (PROSITE_PATTERNS); IPR007087 (PROSITE_PATTERNS); IPR007087 (PROSITE_PATTERNS); IPR007087 (PROSITE_PATTERNS); TRANSMEMBRANE (PHOBIUS); SIGNAL_PEPTIDE_N_REGION (PHOBIUS); SIGNAL_PEPTIDE (PHOBIUS); NON_CYTOPLASMIC_DOMAIN (PHOBIUS); CYTOPLASMIC_DOMAIN (PHOBIUS); SIGNAL_PEPTIDE_H_REGION (PHOBIUS); SIGNAL_PEPTIDE_C_REGION (PHOBIUS); IPR007087 (PROSITE_PROFILES); IPR007087 (PROSITE_PROFILES); IPR007087 (PROSITE_PROFILES); IPR007087 (PROSITE_PROFILES); SignalP-TM (SIGNALP_GRAM_POSITIVE); SignalP-noTM (SIGNALP_GRAM_NEGATIVE); SSF57667 (SUPERFAMILY); SSF57667 (SUPERFAMILY) |
| 2029 | 299980_length_1876_cvg_21.2_tip_1_3 | 459  | methylmalonate-semialdehyde dehydrogenase                        | 626 | 0         | 87.60% | 0.127 | IPR010061 (TIGRFAM); IPR015590 (PFAM); IPR016163 (G3DSA:3.40.309.GENE3D); IPR016162 (G3DSA:3.40.605.GENE3D); IPR010061 (PTHR11699:PANTHER); PTHR11699 (PANTHER); IPR016160 (PROSITE_PATTERNS); TRANSMEMBRANE (PHOBIUS); NON_CYTOPLASMIC_DOMAIN (PHOBIUS); CYTOPLASMIC_DOMAIN (PHOBIUS); IPR016161 (SUPERFAMILY); TMhelix (TMHMM)                                                                                                                                                                                                                                                                                                                                                                                                                             |

|      |                                     |      |                                                    |     |           |        |         |                                                                                                                                                                                                                                                                                                                                                                                                                                                                                                                                                                                                                                                                    |
|------|-------------------------------------|------|----------------------------------------------------|-----|-----------|--------|---------|--------------------------------------------------------------------------------------------------------------------------------------------------------------------------------------------------------------------------------------------------------------------------------------------------------------------------------------------------------------------------------------------------------------------------------------------------------------------------------------------------------------------------------------------------------------------------------------------------------------------------------------------------------------------|
| 2030 | 299992_length_1877_cvg_54.7_tip_1_1 | 1707 | ribosome-binding protein partial                   | 626 | 2.10E-36  | 49.90% | 0.098   | Coil (COILS); PTHR18939:SF4 (PANTHER); PTHR18939 (PANTHER)                                                                                                                                                                                                                                                                                                                                                                                                                                                                                         |
| 2034 | 300056_length_1896_cvg_6.6_tip_1_1  | 190  | sphingomyelin phosphodiesterase                    | 632 | 3.21E-176 | 62.50% | 0.616 Y | IPR011160 (PIRSF); IPR004843 (PFAM); IPR011001 (G3DSA:1.10.225.GENE3D); IPR029052 (G3DSA:3.60.21.GENE3D); PTHR10340:SF13 (PANTHER); PTHR10340 (PANTHER); SIGNAL_PEPTIDE_N_REGION (PHOBIUS); SIGNAL_PEPTIDE (PHOBIUS); SIGNAL_PEPTIDE_C_REGION (PHOBIUS); SIGNAL_PEPTIDE_H_REGION (PHOBIUS); NON_CYTOPLASMIC_DOMAIN (PHOBIUS); IPR008139 (PROSITE_PROFILES); SignalP-TM (SIGNALP_EUK); SignalP-TM (SIGNALP_GRAM_POSITIVE); IPR029052 (SUPERFAMILY); IPR011001 (SUPERFAMILY); TMhelix (TMHMM)                                                                                                                                                                        |
| 2035 | 300108_length_1908_cvg_7.7_tip_1_2  | 198  | katanin p60 atpase-containing subunit a-like 1     | 636 | 0         | 82.00% | 0.14    | IPR003593 (SMART); IPR027417 (G3DSA:3.40.50.GENE3D); G3DSA:1.10.8.60 (GENE3D); IPR003959 (PFAM); IPR015415 (PFAM); PTHR23074 (PANTHER); PTHR23074:SF65 (PANTHER); IPR003960 (PROSITE_PATTERNS); IPR028596 (HAMAP); IPR027417 (SUPERFAMILY)                                                                                                                                                                                                                                                                                                                                                                                                                         |
| 2036 | 300128_length_1911_cvg_12.8_tip_1_3 | 255  | wd repeat-containing protein 36                    | 637 | 0         | 69.70% | 0.111   | IPR001680 (SMART); IPR007319 (PFAM); IPR015943 (G3DSA:2.130.10.GENE3D); IPR001680 (PFAM); IPR015943 (G3DSA:2.130.10.GENE3D); PTHR13889 (PANTHER); PTHR13889:SF2 (PANTHER); IPR020719 (PROSITE_PATTERNS); IPR001680 (PROSITE_PROFILES); IPR001680 (PROSITE_PROFILES); IPR001680 (PROSITE_PROFILES); IPR017986 (PROSITE_PROFILES); IPR017986 (PROSITE_PROFILES); IPR011047 (SUPERFAMILY)                                                                                                                                                                                                                                                                             |
| 2037 | 300136_length_1912_cvg_21.3_tip_1_5 | 595  | dorsal-ventral patterning protein tolloid          | 637 | 0         | 79.50% | 0.177   | Coil (COILS); IPR001506 (PRINTS); IPR006026 (SMART); IPR000859 (SMART); IPR001506 (PFAM); IPR000859 (PFAM); IPR000859 (G3DSA:2.60.120.GENE3D); IPR024079 (G3DSA:3.40.390.GENE3D); PTHR10127:SF304 (PANTHER); PTHR10127 (PANTHER); IPR000859 (PROSITE_PROFILES); IPR000859 (PROSITE_PROFILES); SSF55486 (SUPERFAMILY); IPR000859 (SUPERFAMILY)                                                                                                                                                                                                                                                                                                                      |
| 2038 | 300146_length_1915_cvg_10.9_tip_1_5 | 286  | inter-alpha-trypsin inhibitor heavy chain h3-like  | 638 | 4.59E-122 | 62.80% | 0.105   | Coil (COILS); IPR002035 (SMART); IPR013694 (SMART); IPR013694 (PFAM); IPR002035 (PFAM); IPR002035 (G3DSA:3.40.50.GENE3D); PTHR10338 (PANTHER); PTHR10338:SF108 (PANTHER); NON_CYTOPLASMIC_DOMAIN (PHOBIUS); TRANSMEMBRANE (PHOBIUS); CYTOPLASMIC_DOMAIN (PHOBIUS); IPR013694 (PROSITE_PROFILES); IPR002035 (PROSITE_PROFILES); IPR002035 (SUPERFAMILY); TMhelix (TMHMM)                                                                                                                                                                                                                                                                                            |
| 2039 | 300150_length_1915_cvg_11.4_tip_1_1 | 257  | low-density lipoprotein receptor-related protein 2 | 638 | 1.12E-172 | 70.10% | 0.147   | IPR000033 (SMART); IPR000033 (PFAM); IPR011042 (G3DSA:2.120.10.GENE3D); G3DSA:2.10.25.10 (GENE3D); PTHR10529 (PANTHER); IPR013032 (PROSITE_PATTERNS); IPR013032 (PROSITE_PATTERNS); NON_CYTOPLASMIC_DOMAIN (PHOBIUS); TRANSMEMBRANE (PHOBIUS); CYTOPLASMIC_DOMAIN (PHOBIUS); NON_CYTOPLASMIC_DOMAIN (PHOBIUS); TRANSMEMBRANE (PHOBIUS); CYTOPLASMIC_DOMAIN (PHOBIUS); IPR000033 (PROSITE_PROFILES); IPR000033 (PROSITE_PROFILES); IPR000033 (PROSITE_PROFILES); IPR000033 (PROSITE_PROFILES); IPR000033 (PROSITE_PROFILES); IPR000742 (PROSITE_PROFILES); SSF57196 (SUPERFAMILY); SSF63825 (SUPERFAMILY); TMhelix (TMHMM); TMhelix (TMHMM); TMhelix (TMHMM)        |
| 2040 | 300166_length_1918_cvg_10.2_tip_1_2 | 308  | stabilin-1 isoform x1                              | 639 | 2.90E-127 | 65.80% | 0.204   | IPR000742 (SMART); G3DSA:2.10.25.10 (GENE3D); G3DSA:2.10.25.10 (GENE3D); G3DSA:2.10.25.10 (GENE3D); IPR013032 (PFAM); IPR013032 (PROSITE_PATTERNS); NON_CYTOPLASMIC_DOMAIN (PHOBIUS); CYTOPLASMIC_DOMAIN (PHOBIUS); TRANSMEMBRANE (PHOBIUS); IPR000742 (PROSITE_PROFILES); TMhelix (TMHMM) |
| 2041 | 300172_length_1919_cvg_5.4_tip_1_2  | 169  | aael001570- partial                                | 639 | 1.02E-168 | 55.20% | 0.098   | IPR005018 (SMART); IPR005018 (PFAM); PTHR22979:SF15 (PANTHER); PTHR22979 (PANTHER); IPR013032 (PROSITE_PATTERNS); IPR013032 (PROSITE_PATTERNS); IPR013032 (PROSITE_PATTERNS); IPR005018 (PROSITE_PROFILES); IPR005018 (PROSITE_PROFILES); IPR000742 (PROSITE_PROFILES); IPR000742 (PROSITE_PROFILES)                                                                                                                                                                                                                                                                                                                                                               |



|      |                                     |      |                                                |     |           |        |       |                                                                                                                                                                                                                                                                                                                                                                                                                                                                                                                                                                                                                                                                                                                                                              |
|------|-------------------------------------|------|------------------------------------------------|-----|-----------|--------|-------|--------------------------------------------------------------------------------------------------------------------------------------------------------------------------------------------------------------------------------------------------------------------------------------------------------------------------------------------------------------------------------------------------------------------------------------------------------------------------------------------------------------------------------------------------------------------------------------------------------------------------------------------------------------------------------------------------------------------------------------------------------------|
| 2042 | 300188_length_1924_cvg_61.8_tip_0_0 | 2791 | twitchin isoform x4                            | 642 | 0         | 87.40% | 0.098 | IPR002290 (SMART); IPR003598 (SMART); IPR003599 (SMART); G3DSA:3.30.200.20 (GENE3D); IPR013783 (G3DSA:2.60.40.GENE3D); IPR013783 (G3DSA:2.60.40.GENE3D); IPR013098 (PFAM); IPR000719 (PFAM); G3DSA:1.10.510.10 (GENE3D); PTHR19897 (PANTHER); PTHR19897:SF155 (PANTHER); IPR017441 (PROSITE_PATTERNS); IPR008271 (PROSITE_PATTERNS); IPR007110 (PROSITE_PROFILES); IPR007110 (PROSITE_PROFILES); IPR000719 (PROSITE_PROFILES); SSF48726 (SUPERFAMILY); IPR011009 (SUPERFAMILY); SSF48726 (SUPERFAMILY)                                                                                                                                                                                                                                                       |
| 2043 | 300210_length_1931_cvg_17.2_tip_1_5 | 301  | harmonin isoform x2                            | 643 | 7.57E-52  | 55.80% | 0.12  | Coil (COILS); Coil (COILS); IPR001478 (SMART); IPR001478 (PFAM); IPR001478 (G3DSA:2.30.42.GENE3D); IPR001478 (G3DSA:2.30.42.GENE3D); PTHR23116 (PANTHER); IPR030237 (PTHR23116:PANTHER); IPR001478 (PROSITE_PROFILES); IPR001478 (PROSITE_PROFILES); IPR001478 (SUPERFAMILY); IPR001478 (SUPERFAMILY)                                                                                                                                                                                                                                                                                                                                                                                                                                                        |
| 2044 | 300224_length_1935_cvg_6.0_tip_1_2  | 139  | tolloid-like protein 2 isoform x2              | 645 | 0         | 82.60% | 0.099 | IPR000742 (SMART); IPR000859 (SMART); IPR001881 (SMART); G3DSA:2.10.25.10 (GENE3D); IPR001881 (PFAM); IPR000859 (G3DSA:2.60.120.GENE3D); PF14670 (PFAM); G3DSA:2.10.25.10 (GENE3D); IPR000859 (PFAM); IPR000859 (G3DSA:2.60.120.GENE3D); PTHR10127:SF304 (PANTHER); PTHR10127 (PANTHER); IPR000152 (PROSITE_PATTERNS); IPR000152 (PROSITE_PATTERNS); IPR013032 (PROSITE_PATTERNS); IPR018097 (PROSITE_PATTERNS); IPR013032 (PROSITE_PATTERNS); IPR018097 (PROSITE_PATTERNS); IPR000859 (PROSITE_PROFILES); IPR000742 (PROSITE_PROFILES); IPR000859 (PROSITE_PROFILES); IPR000742 (PROSITE_PROFILES); IPR000859 (PROSITE_PROFILES); IPR000859 (SUPERFAMILY); IPR000859 (SUPERFAMILY); IPR000859 (SUPERFAMILY); SSF57196 (SUPERFAMILY); SSF57196 (SUPERFAMILY) |
| 2045 | 300230_length_1937_cvg_14.6_tip_1_3 | 438  | leucine-rich repeat-containing protein partial | 646 | 2.26E-51  | 47.30% | 0.255 | IPR000483 (SMART); IPR003591 (SMART); G3DSA:3.80.10.10 (GENE3D); IPR026906 (PFAM); G3DSA:3.80.10.10 (GENE3D); IPR001611 (PFAM); PTHR24373 (PANTHER); PTHR24373:SF100 (PANTHER); NON_CYTOPLASMIC_DOMAIN (PHOBIUS); NON_CYTOPLASMIC_DOMAIN (PHOBIUS); TRANSMEMBRANE (PHOBIUS); TRANSMEMBRANE (PHOBIUS); NON_CYTOPLASMIC_DOMAIN (PHOBIUS); CYTOPLASMIC_DOMAIN (PHOBIUS); TRANSMEMBRANE (PHOBIUS); CYTOPLASMIC_DOMAIN (PHOBIUS); TRANSMEMBRANE (PHOBIUS); IPR001611 (PROSITE_PROFILES); IPR001611 (PROSITE_PROFILES); IPR001611 (PROSITE_PROFILES); IPR001611 (PROSITE_PROFILES); IPR001611 (PROSITE_PROFILES); IPR001611 (PROSITE_PROFILES); SSF52058 (SUPERFAMILY); TMhelix (TMHMM); TMhelix (TMHMM); TMhelix (TMHMM); TMhelix (TMHMM)                         |
| 2050 | 300352_length_1973_cvg_17.2_tip_1_5 | 422  | transducin beta-like protein 2                 | 648 | 1.16E-149 | 69.20% | 0.161 | Coil (COILS); IPR001680 (SMART); IPR015943 (G3DSA:2.130.10.GENE3D); IPR001680 (PFAM); PTHR22847:SF380 (PANTHER); PTHR22847 (PANTHER); IPR019775 (PROSITE_PATTERNS); TRANSMEMBRANE (PHOBIUS); NON_CYTOPLASMIC_DOMAIN (PHOBIUS); CYTOPLASMIC_DOMAIN (PHOBIUS); TRANSMEMBRANE (PHOBIUS); NON_CYTOPLASMIC_DOMAIN (PHOBIUS); IPR017986 (PROSITE_PROFILES); IPR001680 (PROSITE_PROFILES); IPR001680 (PROSITE_PROFILES); IPR017986 (SUPERFAMILY); TMhelix (TMHMM)                                                                                                                                                                                                                                                                                                   |
| 2046 | 300260_length_1949_cvg_21.6_tip_1_3 | 486  | mucin- partial                                 | 650 | 2.14E-13  | 40.90% | 0.148 | Coil (COILS); Coil (COILS); G3DSA:2.10.70.10 (GENE3D); IPR001846 (PFAM); IPR014853 (PFAM); PTHR11339 (PANTHER); CYTOPLASMIC_DOMAIN (PHOBIUS); NON_CYTOPLASMIC_DOMAIN (PHOBIUS); NON_CYTOPLASMIC_DOMAIN (PHOBIUS); TRANSMEMBRANE (PHOBIUS); TRANSMEMBRANE (PHOBIUS); IPR000436 (PROSITE_PROFILES); IPR000436 (PROSITE_PROFILES); IPR001846 (PROSITE_PROFILES); IPR000436 (SUPERFAMILY); TMhelix (TMHMM)                                                                                                                                                                                                                                                                                                                                                       |
| 2047 | 300284_length_1957_cvg_22.8_tip_1_4 | 486  | methyltransferase-like protein 23              | 652 | 4.11E-93  | 76.80% | 0.11  | IPR000582 (PRINTS); IPR002110 (SMART); IPR000504 (SMART); IPR019410 (PFAM); IPR014352 (G3DSA:1.20.80.GENE3D); IPR020683 (G3DSA:1.25.40.GENE3D); IPR000582 (PFAM); IPR029063 (G3DSA:3.40.50.GENE3D); IPR000504 (PFAM); IPR012677 (G3DSA:3.30.70.GENE3D); IPR020683 (PFAM); PTHR24119 (PANTHER); PTHR24119:SF0 (PANTHER); IPR020683 (PROSITE_PROFILES); IPR002110 (PROSITE_PROFILES); IPR000504 (PROSITE_PROFILES); IPR002110 (PROSITE_PROFILES); IPR000582 (PROSITE_PROFILES); IPR029063 (SUPERFAMILY); IPR020683 (SUPERFAMILY); IPR000582 (SUPERFAMILY); SSF54928 (SUPERFAMILY)                                                                                                                                                                              |

|      |                                     |        |                                                                             |     |           |        |       |                                                                                                                                                                                                                                                                                                                                                                                                                                                                             |
|------|-------------------------------------|--------|-----------------------------------------------------------------------------|-----|-----------|--------|-------|-----------------------------------------------------------------------------------------------------------------------------------------------------------------------------------------------------------------------------------------------------------------------------------------------------------------------------------------------------------------------------------------------------------------------------------------------------------------------------|
| 2048 | 300298_length_1959_cvg_4.9_tip_1_0  | 147    | membrane metallo-endopeptidase-like 1-like                                  | 653 | 0         | 78.40% | 0.117 | IPR018497 (PRINTS); IPR018497 (PFAM); IPR024079 (G3DSA:3.40.390.GENE3D); IPR008753 (PFAM); IPR000718 (PANTHER); PTHR11733:SF113 (PANTHER); SSF55486 (SUPERFAMILY)                                                                                                                                                                                                                                                                                                           |
| 2049 | 300318_length_1963_cvg_16.0_tip_1_4 | 381    | coatomer subunit beta                                                       | 654 | 0         | 89.00% | 0.104 | IPR001680 (SMART); IPR006692 (PFAM); IPR015943 (G3DSA:2.130.10.GENE3D); IPR001680 (PFAM); PTHR19876:SF2 (PANTHER); PTHR19876 (PANTHER); IPR001680 (PROSITE_PROFILES); IPR001680 (PROSITE_PROFILES); IPR017986 (PROSITE_PROFILES); IPR011044 (SUPERFAMILY); IPR017986 (SUPERFAMILY)                                                                                                                                                                                          |
| 2051 | 300364_length_1975_cvg_13.0_tip_1_4 | 479    | sphingomyelin phosphodiesterase                                             | 658 | 1.48E-177 | 62.80% | 0.221 | IPR008139 (SMART); IPR011160 (PIRSF); IPR004843 (PFAM); IPR007856 (PFAM); IPR029052 (G3DSA:3.60.21.GENE3D); IPR011001 (G3DSA:1.10.225.GENE3D); PTHR10340:SF13 (PANTHER); PTHR10340 (PANTHER); CYTOPLASMIC_DOMAIN (PHOBIUS); TRANSMEMBRANE (PHOBIUS); NON_CYTOPLASMIC_DOMAIN (PHOBIUS); IPR008139 (PROSITE_PROFILES); IPR011001 (SUPERFAMILY); IPR029052 (SUPERFAMILY); TMhelix (TMHMM)                                                                                      |
| 2052 | 300386_length_1981_cvg_6.6_tip_1_3  | 136    | protein phosphatase 1 regulatory subunit 7                                  | 661 | 9.45E-118 | 77.00% | 0.112 | SM00365 (SMART); IPR003591 (SMART); IPR003603 (SMART); IPR025875 (PFAM); PF14580 (PFAM); G3DSA:3.80.10.10 (GENE3D); PTHR10588 (PANTHER); IPR001611 (PROSITE_PROFILES); SSF52058 (SUPERFAMILY) |
| 2053 | 300388_length_1981_cvg_11.0_tip_1_0 | 263    | tyrosine--trna cytoplasmic                                                  | 661 | 0         | 80.60% | 0.134 | IPR002307 (PRINTS); IPR002305 (PFAM); IPR014729 (G3DSA:3.40.50.GENE3D); G3DSA:1.10.240.10 (GENE3D); IPR002547 (PFAM); IPR002307 (TIGRFAM); IPR012340 (G3DSA:2.40.50.GENE3D); PTHR11946 (PANTHER); IPR002547 (PROSITE_PROFILES); SSF52374 (SUPERFAMILY); IPR010987 (SUPERFAMILY); IPR012340 (SUPERFAMILY)                                                                                                                                                                    |
| 2054 | 300442_length_1996_cvg_10.8_tip_1_4 | 267    | chorion peroxidase-like                                                     | 665 | 2.92E-152 | 68.20% | 0.112 | IPR019791 (PRINTS); IPR019791 (PFAM); IPR019791 (G3DSA:1.10.640.GENE3D); PTHR11475 (PANTHER); IPR019791 (PROSITE_PROFILES); IPR010255 (SUPERFAMILY)                                                                                                                                                                                                                                                                                                                         |
| 2055 | 300452_length_2001_cvg_61.1_tip_1_4 | 3823   | glycosyl-phosphatidylinositol-linked carbonic anhydrase                     | 667 | 1.66E-67  | 57.90% | 0.101 | IPR001148 (SMART); IPR001148 (G3DSA:3.10.200.GENE3D); IPR001148 (PFAM); IPR023561 (PANTHER); IPR018338 (PROSITE_PATTERNS); TRANSMEMBRANE (PHOBIUS); CYTOPLASMIC_DOMAIN (PHOBIUS); CYTOPLASMIC_DOMAIN (PHOBIUS); TRANSMEMBRANE (PHOBIUS); NON_CYTOPLASMIC_DOMAIN (PHOBIUS); IPR001148 (PROSITE_PROFILES); IPR001148 (SUPERFAMILY)                                                                                                                                            |
| 2056 | 300454_length_2001_cvg_72.3_tip_0_2 | 914092 | hemocyanin subunit type 1 precursor                                         | 667 | 0         | 76.40% | 0.096 | IPR013788 (PRINTS); IPR005204 (PFAM); IPR008922 (G3DSA:1.10.1280.GENE3D); IPR005204 (G3DSA:1.20.1370.GENE3D); IPR005203 (G3DSA:2.60.40.GENE3D); IPR000896 (PFAM); IPR005203 (PFAM); IPR013788 (PANTHER); IPR013788 (PROSITE_PATTERNS); IPR002227 (PROSITE_PATTERNS); IPR013788 (PROSITE_PATTERNS); IPR014756 (SUPERFAMILY); IPR008922 (SUPERFAMILY); IPR005204 (SUPERFAMILY)                                                                                                |
| 2057 | 300464_length_2004_cvg_10.3_tip_1_2 | 265    | scabrous protein                                                            | 668 | 8.14E-119 | 55.30% | 0.102 | Coil (COILS); Coil (COILS); Coil (COILS); Coil (COILS); Coil (COILS); IPR002181 (SMART); IPR014715 (G3DSA:4.10.530.GENE3D); IPR014716 (G3DSA:3.90.215.GENE3D); IPR002181 (PFAM); PTHR19143 (PANTHER); PTHR19143:SF186 (PANTHER); IPR002181 (PROSITE_PROFILES); IPR002181 (SUPERFAMILY)                                                                                                                                                                                      |
| 2058 | 300468_length_2004_cvg_9.9_tip_1_3  | 264    | btb poz domain-containing protein 17                                        | 668 | 0         | 75.30% | 0.138 | IPR000210 (SMART); IPR011705 (SMART); IPR011705 (PFAM); IPR013069 (PFAM); G3DSA:3.30.710.10 (GENE3D); PTHR24410:SF9 (PANTHER); PTHR24410 (PANTHER); TRANSMEMBRANE (PHOBIUS); NON_CYTOPLASMIC_DOMAIN (PHOBIUS); CYTOPLASMIC_DOMAIN (PHOBIUS); IPR000210 (PROSITE_PROFILES); IPR011333 (SUPERFAMILY); TMhelix (TMHMM)                                                                                                                                                         |
| 2059 | 300494_length_2010_cvg_8.8_tip_1_3  | 203    | nucleolar protein 58-like                                                   | 670 | 1.34E-171 | 83.50% | 0.153 | IPR012976 (SMART); IPR002687 (PFAM); IPR012976 (PFAM); PTHR10894:SF1 (PANTHER); PTHR10894 (PANTHER); IPR002687 (PROSITE_PROFILES); SSF89124 (SUPERFAMILY)                                                                                                                                                                                                                                                                                                                   |
| 2060 | 300496_length_2010_cvg_5.0_tip_1_4  | 123    | low quality protein: hemocytin-like                                         | 670 | 2.14E-66  | 43.30% | 0.103 | IPR001846 (SMART); G3DSA:2.10.25.10 (GENE3D); IPR001846 (PFAM); IPR014853 (PFAM); IPR002919 (PFAM); PTHR11339:SF25 (PANTHER); PTHR11339 (PANTHER); IPR001846 (PROSITE_PROFILES); IPR001846 (PROSITE_PROFILES); IPR002919 (SUPERFAMILY); IPR002919 (SUPERFAMILY)                                                                                                                                                                                                             |
| 2061 | 300502_length_2011_cvg_9.4_tip_1_3  | 290    | serine threonine-protein phosphatase 2b catalytic subunit 2-like isoform x1 | 671 | 0         | 95.00% | 0.108 | IPR006186 (PRINTS); IPR006186 (SMART); IPR004843 (PFAM); IPR029052 (G3DSA:3.60.21.GENE3D); PTHR11668:SF186 (PANTHER); PTHR11668 (PANTHER); IPR006186 (PROSITE_PATTERNS); IPR029052 (SUPERFAMILY)                                                                                                                                                                                                                                                                            |

|      |                                     |      |                                                                              |     |           |        |       |                                                                                                                                                                                                                                                                                                                                                                                                                                                                                                                                                                                                                                                                                                |
|------|-------------------------------------|------|------------------------------------------------------------------------------|-----|-----------|--------|-------|------------------------------------------------------------------------------------------------------------------------------------------------------------------------------------------------------------------------------------------------------------------------------------------------------------------------------------------------------------------------------------------------------------------------------------------------------------------------------------------------------------------------------------------------------------------------------------------------------------------------------------------------------------------------------------------------|
| 2062 | 300504_length_2011_cvg_5.2_tip_1_3  | 160  | phosphatidylinositol -bisphosphate 5-phosphatase a-like                      | 671 | 4.18E-19  | 55.50% | 0.111 | IPR029334 (PFAM)                                                                                                                                                                                                                                                                                                                                                                                                                                                                                                                                                                                                                                                                               |
| 2063 | 300506_length_2011_cvg_54.7_tip_1_3 | 2702 | inactive pancreatic lipase-related protein 1                                 | 671 | 1.20E-96  | 57.30% | 0.133 | IPR002331 (PRINTS); IPR000734 (PRINTS); IPR001024 (G3DSA:2.60.60.GENE3D); IPR013818 (PFAM); IPR029058 (G3DSA:3.40.50.GENE3D); IPR000734 (PANTHER); IPR001024 (PROSITE_PROFILES); IPR029058 (SUPERFAMILY); IPR008976 (SUPERFAMILY)                                                                                                                                                                                                                                                                                                                                                                                                                                                              |
| 2064 | 300522_length_2017_cvg_51.3_tip_1_0 | 2078 | adp-ribosylation factor 1                                                    | 673 | 3.10E-127 | 98.50% | 0.253 | IPR006689 (PRINTS); IPR006687 (SMART); IPR003579 (SMART); IPR024156 (SMART); IPR027417 (G3DSA:3.40.50.GENE3D); IPR005225 (TIGRFAM); IPR006689 (PFAM); PTHR11711 (PANTHER); PTHR11711:SF118 (PANTHER); NON_CYTOPLASMIC_DOMAIN (PHOBIUS); CYTOPLASMIC_DOMAIN (PHOBIUS); NON_CYTOPLASMIC_DOMAIN (PHOBIUS); TRANSMEMBRANE (PHOBIUS); TRANSMEMBRANE (PHOBIUS); NON_CYTOPLASMIC_DOMAIN (PHOBIUS); TRANSMEMBRANE (PHOBIUS); CYTOPLASMIC_DOMAIN (PHOBIUS); TRANSMEMBRANE (PHOBIUS); TRANSMEMBRANE (PHOBIUS); CYTOPLASMIC_DOMAIN (PHOBIUS); IPR024156 (PROSITE_PROFILES); IPR027417 (SUPERFAMILY); TMhelix (TMHMM); TMhelix (TMHMM); TMhelix (TMHMM); TMhelix (TMHMM); TMhelix (TMHMM); TMhelix (TMHMM) |
| 2065 | 300532_length_2020_cvg_4.2_tip_1_1  | 166  | twitchin isoform x4                                                          | 673 | 0         | 83.90% | 0.113 | PR00014 (PRINTS); IPR003961 (SMART); IPR003599 (SMART); IPR013783 (G3DSA:2.60.40.GENE3D); IPR013098 (PFAM); IPR013783 (G3DSA:2.60.40.GENE3D); IPR013783 (G3DSA:2.60.40.GENE3D); IPR013783 (G3DSA:2.60.40.GENE3D); IPR003961 (PFAM); PTHR19897 (PANTHER); PTHR19897:SF155 (PANTHER); IPR003961 (PROSITE_PROFILES); IPR003961 (PROSITE_PROFILES); IPR003961 (PROSITE_PROFILES); IPR003961 (PROSITE_PROFILES); IPR007110 (PROSITE_PROFILES); SSF48726 (SUPERFAMILY); IPR003961 (SUPERFAMILY); IPR003961 (SUPERFAMILY); IPR003961 (SUPERFAMILY); SSF48726 (SUPERFAMILY); SSF48726 (SUPERFAMILY)                                                                                                    |
| 2066 | 300538_length_2022_cvg_14.3_tip_1_2 | 313  | low quality protein: low-density lipoprotein receptor-related protein 2-like | 674 | 1.46E-25  | 50.00% | 0.11  | IPR002172 (PRINTS); IPR002172 (SMART); IPR002172 (G3DSA:4.10.400.GENE3D); IPR002172 (PFAM); PTHR10529 (PANTHER); IPR002172 (PROSITE_PROFILES); IPR002172 (PROSITE_PROFILES); IPR002172 (PROSITE_PROFILES); IPR002172 (SUPERFAMILY); IPR002172 (SUPERFAMILY); IPR002172 (SUPERFAMILY)                                                                                                                                                                                                                                                                                                                                                                                                           |
| 2067 | 300542_length_2023_cvg_3.2_tip_1_5  | 97   | heme utilization protein                                                     | 674 | 1.67E-20  | 46.80% | 0.123 | no IPS match                                                                                                                                                                                                                                                                                                                                                                                                                                                                                                                                                                                                                                                                                   |
| 2068 | 300560_length_2030_cvg_7.7_tip_1_1  | 231  | uncharacterized threonine-rich gpi-anchored glyco isoform x5                 | 677 | 0         | 90.60% | 0.271 | Coil (COILS); IPR002290 (SMART); IPR000719 (PFAM); G3DSA:1.10.510.10 (GENE3D); G3DSA:3.30.200.20 (GENE3D); PTHR13902 (PANTHER); IPR008271 (PROSITE_PATTERNS); IPR000719 (PROSITE_PROFILES); IPR011009 (SUPERFAMILY)                                                                                                                                                                                                                                                                                                                                                                                                                                                                            |
| 2069 | 300572_length_2032_cvg_26.3_tip_1_2 | 613  | angiotensin-converting enzyme 2                                              | 677 | 2.92E-92  | 71.70% | 0.128 | IPR001548 (PRINTS); IPR001548 (PFAM); IPR001548 (PANTHER); NON_CYTOPLASMIC_DOMAIN (PHOBIUS); TRANSMEMBRANE (PHOBIUS); NON_CYTOPLASMIC_DOMAIN (PHOBIUS); CYTOPLASMIC_DOMAIN (PHOBIUS); NON_CYTOPLASMIC_DOMAIN (PHOBIUS); TRANSMEMBRANE (PHOBIUS); CYTOPLASMIC_DOMAIN (PHOBIUS); TRANSMEMBRANE (PHOBIUS); TRANSMEMBRANE (PHOBIUS); SSF55486 (SUPERFAMILY); TMhelix (TMHMM); TMhelix (TMHMM)                                                                                                                                                                                                                                                                                                      |
| 2070 | 300590_length_2039_cvg_35.4_tip_1_0 | 800  | macrophage mannose receptor 1                                                | 680 | 2.37E-81  | 51.60% | 0.105 | IPR001304 (SMART); IPR016186 (G3DSA:3.10.100.GENE3D); IPR001304 (PFAM); IPR016186 (G3DSA:3.10.100.GENE3D); PTHR22803:SF16 (PANTHER); PTHR22803 (PANTHER); IPR018378 (PROSITE_PATTERNS); IPR018378 (PROSITE_PATTERNS); NON_CYTOPLASMIC_DOMAIN (PHOBIUS); CYTOPLASMIC_DOMAIN (PHOBIUS); TRANSMEMBRANE (PHOBIUS); IPR001304 (PROSITE_PROFILES); IPR001304 (PROSITE_PROFILES); IPR001304 (PROSITE_PROFILES); IPR016187 (SUPERFAMILY); IPR016187 (SUPERFAMILY); IPR016187 (SUPERFAMILY); TMhelix (TMHMM)                                                                                                                                                                                            |

|      |                                     |      |                                              |     |           |        |         |                                                                                                                                                                                                                                                                                                                                                                                                                                                                                                                                                                                                                                                                                                                                                                                                                                  |
|------|-------------------------------------|------|----------------------------------------------|-----|-----------|--------|---------|----------------------------------------------------------------------------------------------------------------------------------------------------------------------------------------------------------------------------------------------------------------------------------------------------------------------------------------------------------------------------------------------------------------------------------------------------------------------------------------------------------------------------------------------------------------------------------------------------------------------------------------------------------------------------------------------------------------------------------------------------------------------------------------------------------------------------------|
|      |                                     |      |                                              |     |           |        |         | IPR003591 (SMART); SM00365 (SMART); IPR001611 (PFAM); G3DSA:3.80.10.10 (GENE3D); PTHR24373 (PANTHER); PTHR24373:SF98 (PANTHER); NON_CYTOPLASMIC_DOMAIN (PHOBIUS); CYTOPLASMIC_DOMAIN (PHOBIUS); TRANSMEMBRANE (PHOBIUS); CYTOPLASMIC_DOMAIN (PHOBIUS); NON_CYTOPLASMIC_DOMAIN (PHOBIUS); NON_CYTOPLASMIC_DOMAIN (PHOBIUS); TRANSMEMBRANE (PHOBIUS); TRANSMEMBRANE (PHOBIUS); CYTOPLASMIC_DOMAIN (PHOBIUS); TRANSMEMBRANE (PHOBIUS); TRANSMEMBRANE (PHOBIUS); TRANSMEMBRANE (PHOBIUS); CYTOPLASMIC_DOMAIN (PHOBIUS); IPR001611 (PROSITE_PROFILES); SSF52058 (SUPERFAMILY); TMhelix (TMHMM); TMhelix (TMHMM); TMhelix (TMHMM); TMhelix (TMHMM) |
| 2071 | 300592_length_2040_cvg_20.6_tip_1_2 | 571  | slit protein                                 | 680 | 6.92E-94  | 69.80% | 0.112   |                                                                                                                                                                                                                                                                                                                                                                                                                                                                                                                                                                                                                                                                                                                                                                                                                                  |
| 2072 | 300608_length_2046_cvg_36.7_tip_1_2 | 943  | n-acetylgalactosamine-6-sulfatase isoform x1 | 682 | 0         | 77.60% | 0.097   | G3DSA:3.30.1120.10 (GENE3D); IPR017849 (G3DSA:3.40.720.GENE3D); PF14707 (PFAM); IPR000917 (PFAM); PTHR10342:SF27 (PANTHER); PTHR10342 (PANTHER); IPR024607 (PROSITE_PATTERNS); IPR017850 (SUPERFAMILY)                                                                                                                                                                                                                                                                                                                                                                                                                                                                                                                                                                                                                           |
| 2073 | 300620_length_2048_cvg_6.7_tip_1_0  | 257  | peptidyl-prolyl cis-trans mitochondrial      | 683 | 1.94E-141 | 56.80% | 0.175   | IPR001841 (SMART); IPR013083 (G3DSA:3.30.40.GENE3D); IPR002130 (PFAM); IPR029000 (G3DSA:2.40.100.GENE3D); IPR024936 (PANTHER); IPR017907 (PROSITE_PATTERNS); NON_CYTOPLASMIC_DOMAIN (PHOBIUS); CYTOPLASMIC_DOMAIN (PHOBIUS); TRANSMEMBRANE (PHOBIUS); IPR002130 (PROSITE_PROFILES); IPR001841 (PROSITE_PROFILES); IPR000315 (PROSITE_PROFILES); SSF57850 (SUPERFAMILY); IPR029000 (SUPERFAMILY); SSF57845 (SUPERFAMILY)                                                                                                                                                                                                                                                                                                                                                                                                          |
| 2074 | 300626_length_2049_cvg_45.0_tip_1_0 | 1505 | moxd1 homolog 2                              | 683 | 6.02E-127 | 56.20% | 0.241   | IPR000945 (PRINTS); IPR005018 (SMART); IPR014784 (G3DSA:2.60.120.GENE3D); PF03712 (PFAM); IPR005018 (PFAM); IPR000323 (G3DSA:2.60.120.GENE3D); IPR015920 (G3DSA:2.60.40.GENE3D); IPR000323 (PFAM); IPR000945 (PANTHER); PTHR10157:SF23 (PANTHER); TRANSMEMBRANE (PHOBIUS); CYTOPLASMIC_DOMAIN (PHOBIUS); NON_CYTOPLASMIC_DOMAIN (PHOBIUS); IPR005018 (PROSITE_PROFILES); IPR008977 (SUPERFAMILY); SSF49344 (SUPERFAMILY); IPR008977 (SUPERFAMILY); TMhelix (TMHMM)                                                                                                                                                                                                                                                                                                                                                               |
| 2075 | 300654_length_2056_cvg_6.2_tip_1_1  | 189  | muscle m-line assembly protein unc-89        | 685 | 0         | 67.50% | 0.106   | IPR003599 (SMART); IPR003598 (SMART); IPR013783 (G3DSA:2.60.40.GENE3D); IPR013783 (G3DSA:2.60.40.GENE3D); IPR013783 (G3DSA:2.60.40.GENE3D); IPR013783 (G3DSA:2.60.40.GENE3D); IPR013098 (PFAM); IPR020675 (PANTHER); PTHR22964:SF45 (PANTHER); IPR007110 (PROSITE_PROFILES); IPR007110 (PROSITE_PROFILES); IPR007110 (PROSITE_PROFILES); IPR007110 (PROSITE_PROFILES); SSF48726 (SUPERFAMILY); SSF48726 (SUPERFAMILY); SSF48726 (SUPERFAMILY); SSF48726 (SUPERFAMILY); SSF48726 (SUPERFAMILY)                                                                                                                                                                                                                                                                                                                                    |
| 2076 | 300676_length_2063_cvg_10.8_tip_1_2 | 236  | counting factor associated protein d-like    | 687 | 0         | 76.80% | 0.288   | IPR000668 (PRINTS); IPR000668 (SMART); IPR013201 (SMART); IPR000668 (PFAM); IPR013201 (PFAM); G3DSA:3.90.70.10 (GENE3D); PTHR12411:SF284 (PANTHER); IPR013128 (PANTHER); IPR025660 (PROSITE_PATTERNS); IPR000169 (PROSITE_PATTERNS); IPR025661 (PROSITE_PATTERNS); CYTOPLASMIC_DOMAIN (PHOBIUS); TRANSMEMBRANE (PHOBIUS); NON_CYTOPLASMIC_DOMAIN (PHOBIUS); SSF54001 (SUPERFAMILY); TMhelix (TMHMM)                                                                                                                                                                                                                                                                                                                                                                                                                              |
| 2077 | 300684_length_2065_cvg_50.9_tip_1_4 | 1596 | spermine oxidase                             | 688 | 5.41E-117 | 51.70% | 0.531 Y | G3DSA:3.50.50.60 (GENE3D); IPR011032 (G3DSA:3.90.180.GENE3D); G3DSA:3.90.660.10 (GENE3D); IPR002937 (PFAM); PTHR10742:SF255 (PANTHER); PTHR10742 (PANTHER); TRANSMEMBRANE (PHOBIUS); CYTOPLASMIC_DOMAIN (PHOBIUS); TRANSMEMBRANE (PHOBIUS); NON_CYTOPLASMIC_DOMAIN (PHOBIUS); NON_CYTOPLASMIC_DOMAIN (PHOBIUS); SignalP-noTM (SIGNALP_EUK); SSF51905 (SUPERFAMILY); SSF54373 (SUPERFAMILY); TMhelix (TMHMM)                                                                                                                                                                                                                                                                                                                                                                                                                      |
| 2079 | 300690_length_2066_cvg_23.9_tip_1_2 | 603  | prostaglandin g h synthase 2-like isoform x3 | 688 | 0         | 70.20% | 0.383 Y | IPR019791 (PRINTS); G3DSA:2.10.25.10 (GENE3D); IPR019791 (G3DSA:1.10.640.GENE3D); IPR019791 (PFAM); PTHR11903 (PANTHER); PTHR11903:SF10 (PANTHER); TRANSMEMBRANE (PHOBIUS); NON_CYTOPLASMIC_DOMAIN (PHOBIUS); CYTOPLASMIC_DOMAIN (PHOBIUS); IPR000742 (PROSITE_PROFILES); IPR019791 (PROSITE_PROFILES); SignalP-TM (SIGNALP_GRAM_POSITIVE); SSF57196 (SUPERFAMILY); IPR010255 (SUPERFAMILY); TMhelix (TMHMM)                                                                                                                                                                                                                                                                                                                                                                                                                     |

|      |                                     |      |                                                                 |     |           |        |         |                                                                                                                                                                                                                                                                                                                                                                                                                                                                                                                                                                                                                                                                                                                                            |
|------|-------------------------------------|------|-----------------------------------------------------------------|-----|-----------|--------|---------|--------------------------------------------------------------------------------------------------------------------------------------------------------------------------------------------------------------------------------------------------------------------------------------------------------------------------------------------------------------------------------------------------------------------------------------------------------------------------------------------------------------------------------------------------------------------------------------------------------------------------------------------------------------------------------------------------------------------------------------------|
| 2078 | 300688_length_2066_cvg_6.1_tip_1_1  | 175  | carboxypeptidase d                                              | 689 | 0         | 63.70% | 0.111   | IPR000834 (PRINTS); IPR000834 (SMART); G3DSA:3.40.630.10 (GENE3D); G3DSA:3.40.630.10 (GENE3D); IPR000834 (PFAM); IPR014766 (G3DSA:2.60.40.GENE3D); PF13620 (PFAM); IPR015567 (PTHR11532:PANTHER); PTHR11532 (PANTHER); IPR000834 (PROSITE_PATTERNS); IPR000834 (PROSITE_PATTERNS); IPR008969 (SUPERFAMILY); SSF53187 (SUPERFAMILY); IPR008969 (SUPERFAMILY)                                                                                                                                                                                                                                                                                                                                                                                |
| 2080 | 300710_length_2071_cvg_5.0_tip_1_1  | 144  | latrophilin- partial                                            | 690 | 2.13E-95  | 53.90% | 0.116   | IPR000832 (PRINTS); IPR000203 (SMART); IPR000203 (PFAM); IPR000832 (PFAM); IPR022624 (PFAM); PTHR12011 (PANTHER); CYTOPLASMIC_DOMAIN (PHOBIUS); TRANSMEMBRANE (PHOBIUS); TRANSMEMBRANE (PHOBIUS); NON_CYTOPLASMIC_DOMAIN (PHOBIUS); CYTOPLASMIC_DOMAIN (PHOBIUS); CYTOPLASMIC_DOMAIN (PHOBIUS); TRANSMEMBRANE (PHOBIUS); NON_CYTOPLASMIC_DOMAIN (PHOBIUS); TRANSMEMBRANE (PHOBIUS); TRANSMEMBRANE (PHOBIUS); NON_CYTOPLASMIC_DOMAIN (PHOBIUS); NON_CYTOPLASMIC_DOMAIN (PHOBIUS); TRANSMEMBRANE (PHOBIUS); CYTOPLASMIC_DOMAIN (PHOBIUS); IPR000203 (PROSITE_PROFILES); IPR017981 (PROSITE_PROFILES); TMhelix (TMHMM); TMhelix (TMHMM) |
| 2081 | 300714_length_2073_cvg_6.3_tip_1_3  | 179  | extracellular serine threonine protein kinase fam20c isoform x1 | 691 | 0         | 71.70% | 0.102   | IPR009581 (PFAM); IPR024869 (PANTHER); PTHR12450:SF8 (PANTHER); TRANSMEMBRANE (PHOBIUS); CYTOPLASMIC_DOMAIN (PHOBIUS); NON_CYTOPLASMIC_DOMAIN (PHOBIUS); TRANSMEMBRANE (PHOBIUS); NON_CYTOPLASMIC_DOMAIN (PHOBIUS); TMhelix (TMHMM); TMhelix (TMHMM)                                                                                                                                                                                                                                                                                                                                                                                                                                                                                       |
| 2082 | 300722_length_2077_cvg_34.8_tip_1_4 | 846  | probable cytochrome p450 49a1                                   | 692 | 2.58E-143 | 62.70% | 0.153   | IPR002401 (PRINTS); IPR001128 (PRINTS); IPR001128 (G3DSA:1.10.630.GENE3D); IPR001128 (PFAM); PTHR24305:SF49 (PANTHER); PTHR24305 (PANTHER); IPR017972 (PROSITE_PATTERNS); IPR001128 (SUPERFAMILY)                                                                                                                                                                                                                                                                                                                                                                                                                                                                                                                                          |
| 2083 | 300736_length_2087_cvg_13.0_tip_1_1 | 481  | probable chitinase 3                                            | 696 | 2.20E-133 | 56.70% | 0.118   | IPR002557 (SMART); IPR011583 (SMART); IPR029070 (G3DSA:3.10.50.GENE3D); IPR002557 (PFAM); IPR013781 (G3DSA:3.20.20.GENE3D); IPR002557 (G3DSA:2.170.140.GENE3D); IPR001223 (PFAM); PTHR11177 (PANTHER); PTHR11177:SF112 (PANTHER); IPR001579 (PROSITE_PATTERNS); TRANSMEMBRANE (PHOBIUS); CYTOPLASMIC_DOMAIN (PHOBIUS); TRANSMEMBRANE (PHOBIUS); CYTOPLASMIC_DOMAIN (PHOBIUS); NON_CYTOPLASMIC_DOMAIN (PHOBIUS); NON_CYTOPLASMIC_DOMAIN (PHOBIUS); TRANSMEMBRANE (PHOBIUS); IPR002557 (PROSITE_PROFILES); IPR029070 (SUPERFAMILY); IPR017853 (SUPERFAMILY); IPR002557 (SUPERFAMILY); TMhelix (TMHMM); TMhelix (TMHMM)                                                                                                                       |
| 2084 | 300772_length_2099_cvg_6.0_tip_1_2  | 159  | retinol dehydrogenase 13-like                                   | 699 | 5.97E-88  | 66.70% | 0.315   | IPR002198 (PRINTS); IPR002347 (PRINTS); IPR002198 (PFAM); IPR016040 (G3DSA:3.40.50.GENE3D); PTHR24320 (PANTHER); IPR020904 (PROSITE_PATTERNS); SIGNAL_PEPTIDE_H_REGION (PHOBIUS); NON_CYTOPLASMIC_DOMAIN (PHOBIUS); TRANSMEMBRANE (PHOBIUS); SIGNAL_PEPTIDE_C_REGION (PHOBIUS); SIGNAL_PEPTIDE_N_REGION (PHOBIUS); CYTOPLASMIC_DOMAIN (PHOBIUS); SIGNAL_PEPTIDE (PHOBIUS); SSF51735 (SUPERFAMILY); TMhelix (TMHMM)                                                                                                                                                                                                                                                                                                                         |
| 2085 | 300776_length_2101_cvg_17.6_tip_1_3 | 621  | vitellogenin 2                                                  | 701 | 4.66E-106 | 49.50% | 0.576 Y | IPR001747 (SMART); IPR015816 (G3DSA:2.30.230.GENE3D); IPR001747 (PFAM); IPR011030 (G3DSA:1.25.10.GENE3D); PTHR23345 (PANTHER); PTHR23345:SF1 (PANTHER); SIGNAL_PEPTIDE_C_REGION (PHOBIUS); SIGNAL_PEPTIDE (PHOBIUS); SIGNAL_PEPTIDE_H_REGION (PHOBIUS); SIGNAL_PEPTIDE_N_REGION (PHOBIUS); NON_CYTOPLASMIC_DOMAIN (PHOBIUS); IPR001747 (PROSITE_PROFILES); SignalIP-TM (SIGNALP_EUK); IPR015819 (SUPERFAMILY); IPR011030 (SUPERFAMILY); TMhelix (TMHMM)                                                                                                                                                                                                                                                                                    |
| 2086 | 300778_length_2101_cvg_63.1_tip_1_0 | 3426 | aldehyde dehydrogenase 2 family                                 | 701 | 0         | 83.00% | 0.228   | IPR016163 (G3DSA:3.40.309.GENE3D); IPR016162 (G3DSA:3.40.605.GENE3D); IPR015590 (PFAM); PTHR11699:SF145 (PANTHER); PTHR11699 (PANTHER); IPR016160 (PROSITE_PATTERNS); IPR029510 (PROSITE_PATTERNS); IPR016161 (SUPERFAMILY)                                                                                                                                                                                                                                                                                                                                                                                                                                                                                                                |



|      |                                     |      |     |                                                                                   |     |          |        |  |         |                                                                                                                                                                                                                                                                                                                                                                                                                                                                                                                                                                                                                                                                                                                                                                         |
|------|-------------------------------------|------|-----|-----------------------------------------------------------------------------------|-----|----------|--------|--|---------|-------------------------------------------------------------------------------------------------------------------------------------------------------------------------------------------------------------------------------------------------------------------------------------------------------------------------------------------------------------------------------------------------------------------------------------------------------------------------------------------------------------------------------------------------------------------------------------------------------------------------------------------------------------------------------------------------------------------------------------------------------------------------|
| 2087 | 300802_length_2110_cvg_31.9_tip_1_4 | 1821 | --- | NA---                                                                             | 703 |          |        |  | 0.477 Y | IPR012674 (G3DSA:2.40.128.GENE3D); PTHR10612 (PANTHER); PTHR10612:SF7 (PANTHER); SIGNAL_PEPTIDE (PHOBIUS); TRANSMEMBRANE (PHOBIUS); NON_CYTOPLASMIC_DOMAIN (PHOBIUS); CYTOPLASMIC_DOMAIN (PHOBIUS); TRANSMEMBRANE (PHOBIUS); NON_CYTOPLASMIC_DOMAIN (PHOBIUS); SIGNAL_PEPTIDE_C_REGION (PHOBIUS); CYTOPLASMIC_DOMAIN (PHOBIUS); SIGNAL_PEPTIDE_H_REGION (PHOBIUS); TRANSMEMBRANE (PHOBIUS); SIGNAL_PEPTIDE_N_REGION (PHOBIUS); IPR011038 (SUPERFAMILY); TMhelix (TMHMM); TMhelix (TMHMM); TMhelix (TMHMM); TMhelix (TMHMM)                                                                                                                                                                                                                                              |
| 2088 | 300806_length_2113_cvg_10.0_tip_1_5 | 298  |     | lamin dm0-like isoform x1                                                         | 704 | 0        | 75.60% |  | 0.312   | Coil (COILS); Coil (COILS); Coil (COILS); Coil (COILS); Coil (COILS); IPR001322 (G3DSA:2.60.40.GENE3D); G3DSA:1.20.5.170 (GENE3D); IPR001664 (PFAM); IPR001322 (PFAM); IPR001664 (PANTHER); IPR027696 (PTHR23239:PANTHER); IPR018039 (PROSITE_PATTERNS); SignalP-TM (SIGNALP_GRAM_POSITIVE); SSF64593 (SUPERFAMILY); SSF64593 (SUPERFAMILY); IPR001322 (SUPERFAMILY)                                                                                                                                                                                                                                                                                                                                                                                                    |
| 2089 | 300814_length_2115_cvg_10.6_tip_1_0 | 253  |     | laminin subunit alpha-like                                                        | 705 | 2.79E-83 | 61.10% |  | 0.111   | IPR001791 (SMART); IPR001791 (PFAM); IPR013320 (G3DSA:2.60.120.GENE3D); IPR013320 (G3DSA:2.60.120.GENE3D); PTHR10574:SF39 (PANTHER); PTHR10574 (PANTHER); TRANSMEMBRANE (PHOBIUS); NON_CYTOPLASMIC_DOMAIN (PHOBIUS); TRANSMEMBRANE (PHOBIUS); TRANSMEMBRANE (PHOBIUS); CYTOPLASMIC_DOMAIN (PHOBIUS); NON_CYTOPLASMIC_DOMAIN (PHOBIUS); CYTOPLASMIC_DOMAIN (PHOBIUS); TRANSMEMBRANE (PHOBIUS); NON_CYTOPLASMIC_DOMAIN (PHOBIUS); TRANSMEMBRANE (PHOBIUS); TRANSMEMBRANE (PHOBIUS); TRANSMEMBRANE (PHOBIUS); TRANSMEMBRANE (PHOBIUS); IPR001791 (PROSITE_PROFILES); IPR001791 (PROSITE_PROFILES); IPR013320 (SUPERFAMILY); IPR013320 (SUPERFAMILY); TMhelix (TMHMM); TMhelix (TMHMM); TMhelix (TMHMM); TMhelix (TMHMM); TMhelix (TMHMM); TMhelix (TMHMM); TMhelix (TMHMM) |
| 2090 | 300832_length_2117_cvg_29.3_tip_1_3 | 907  |     | catalase                                                                          | 706 | 0        | 84.60% |  | 0.278   | IPR018028 (PRINTS); IPR011614 (SMART); IPR011614 (G3DSA:2.40.180.GENE3D); IPR011614 (PFAM); IPR010582 (PFAM); IPR018028 (PANTHER); IPR002226 (PROSITE_PATTERNS); IPR024708 (PROSITE_PATTERNS); IPR018028 (PROSITE_PROFILES); IPR020835 (SUPERFAMILY)                                                                                                                                                                                                                                                                                                                                                                                                                                                                                                                    |
| 2091 | 300846_length_2122_cvg_47.4_tip_1_4 | 2745 |     | von willebrand factor type egf and pentraxin domain-containing protein 1-like     | 707 | 9.85E-14 | 39.70% |  | 0.707 Y | IPR000436 (SMART); IPR000436 (PFAM); G3DSA:2.10.70.10 (GENE3D); G3DSA:2.10.70.10 (GENE3D); G3DSA:2.10.70.10 (GENE3D); PTHR19325 (PANTHER); PTHR19325:SF321 (PANTHER); NON_CYTOPLASMIC_DOMAIN (PHOBIUS); TRANSMEMBRANE (PHOBIUS); CYTOPLASMIC_DOMAIN (PHOBIUS); IPR000436 (PROSITE_PROFILES); IPR000436 (PROSITE_PROFILES); IPR000436 (PROSITE_PROFILES); IPR000436 (PROSITE_PROFILES); SignalP-noTM (SIGNALP_EUK); IPR000436 (SUPERFAMILY); IPR000436 (SUPERFAMILY); TMhelix (TMHMM)                                                                                                                                                                                                                                                                                    |
| 2092 | 300864_length_2132_cvg_8.7_tip_1_0  | 234  |     | guanine nucleotide exchange                                                       | 711 | 0        | 70.50% |  | 0.102   | Coil (COILS); IPR000219 (SMART); IPR001849 (SMART); IPR001452 (SMART); IPR000219 (PFAM); IPR001452 (PFAM); IPR000219 (G3DSA:1.20.900.GENE3D); G3DSA:2.30.30.40 (GENE3D); IPR011993 (G3DSA:2.30.29.GENE3D); PTHR12845 (PANTHER); PTHR12845:SF5 (PANTHER); IPR000219 (PROSITE_PROFILES); IPR001849 (PROSITE_PROFILES); IPR001452 (PROSITE_PROFILES); IPR001452 (SUPERFAMILY); IPR000219 (SUPERFAMILY); SSF50729 (SUPERFAMILY)                                                                                                                                                                                                                                                                                                                                             |
| 2093 | 300868_length_2134_cvg_14.0_tip_1_2 | 416  |     | gels_homam ame: full= cytoplasmic ame: full=actin-depolymerizing factor short=adf | 711 | 0        | 73.20% |  | 0.138   | IPR007122 (PRINTS); IPR007122 (SMART); IPR029006 (G3DSA:3.40.20.GENE3D); IPR029006 (G3DSA:3.40.20.GENE3D); IPR007123 (PFAM); IPR007122 (PANTHER); SSF55753 (SUPERFAMILY); SSF55753 (SUPERFAMILY); SSF55753 (SUPERFAMILY); SSF55753 (SUPERFAMILY); SSF55753 (SUPERFAMILY)                                                                                                                                                                                                                                                                                                                                                                                                                                                                                                |
| 2094 | 300870_length_2135_cvg_9.6_tip_1_2  | 302  |     | angiotensin-converting enzyme-like                                                | 711 | 0        | 71.20% |  | 0.507 Y | IPR001548 (PRINTS); IPR001548 (PFAM); IPR001548 (PANTHER); TRANSMEMBRANE (PHOBIUS); NON_CYTOPLASMIC_DOMAIN (PHOBIUS); CYTOPLASMIC_DOMAIN (PHOBIUS); SignalP-noTM (SIGNALP_EUK); SSF55486 (SUPERFAMILY)                                                                                                                                                                                                                                                                                                                                                                                                                                                                                                                                                                  |
| 2095 | 300878_length_2137_cvg_10.1_tip_1_4 | 291  |     | cyclin-dependent kinase 12 isoform x1                                             | 712 | 0        | 82.00% |  | 0.104   | IPR002290 (SMART); IPR000719 (PFAM); G3DSA:1.10.510.10 (GENE3D); G3DSA:3.30.200.20 (GENE3D); PTHR24056:SF125 (PANTHER); PTHR24056 (PANTHER); IPR017441 (PROSITE_PATTERNS); IPR008271 (PROSITE_PATTERNS); IPR000719 (PROSITE_PROFILES); IPR011009 (SUPERFAMILY)                                                                                                                                                                                                                                                                                                                                                                                                                                                                                                          |
| 2096 | 300886_length_2142_cvg_9.5_tip_1_1  | 291  |     | adenosine deaminase cecr1                                                         | 714 | 2.68E-40 | 77.10% |  | 0.114   | G3DSA:3.20.20.140 (GENE3D); IPR001365 (PFAM); PTHR11409 (PANTHER); PTHR11409:SF39 (PANTHER); SSF51556 (SUPERFAMILY); TMhelix (TMHMM)                                                                                                                                                                                                                                                                                                                                                                                                                                                                                                                                                                                                                                    |

|      |                                     |      |                                                          |     |           |        |         |                                                                                                                                                                                                                                                                                                                                                                                                                                                                                                                                                                                                                                                                |
|------|-------------------------------------|------|----------------------------------------------------------|-----|-----------|--------|---------|----------------------------------------------------------------------------------------------------------------------------------------------------------------------------------------------------------------------------------------------------------------------------------------------------------------------------------------------------------------------------------------------------------------------------------------------------------------------------------------------------------------------------------------------------------------------------------------------------------------------------------------------------------------|
| 2097 | 300892_length_2143_cvg_9.7_tip_1_0  | 318  | membrane metallo-endopeptidase-like 1-like               | 715 | 2.56E-163 | 62.10% | 0.124   | IPR018497 (PRINTS); IPR024079 (G3DSA:3.40.390.GENE3D); IPR008753 (PFAM); IPR018497 (PFAM); IPR000718 (PANTHER); SSF55486 (SUPERFAMILY); IPR015880 (SMART); IPR013087 (G3DSA:3.30.160.GENE3D); IPR013087 (G3DSA:3.30.160.GENE3D); IPR013087 (G3DSA:3.30.160.GENE3D); PF13465 (PFAM); PTHR10042:SF24 (PANTHER); PTHR10042 (PANTHER); IPR007087 (PROSITE_PATTERNS); IPR007087 (PROSITE_PATTERNS); IPR007087 (PROSITE_PATTERNS); CYTOPLASMIC_DOMAIN (PHOBIUS); NON_CYTOPLASMIC_DOMAIN (PHOBIUS); TRANSMEMBRANE (PHOBIUS); IPR007087 (PROSITE_PROFILES); IPR007087 (PROSITE_PROFILES); IPR007087 (PROSITE_PROFILES); SSF57667 (SUPERFAMILY); SSF57667 (SUPERFAMILY) |
| 2098 | 300896_length_2144_cvg_8.8_tip_1_0  | 259  | early growth response                                    | 715 | 1.09E-120 | 54.80% | 0.106   | IPR001506 (PRINTS); IPR006026 (SMART); IPR000859 (SMART); IPR024079 (G3DSA:3.40.390.GENE3D); IPR000859 (G3DSA:2.60.120.GENE3D); IPR000859 (G3DSA:2.60.120.GENE3D); IPR001506 (PFAM); IPR000859 (PFAM); PTHR10127 (PANTHER); IPR000859 (PROSITE_PROFILES); IPR000859 (SUPERFAMILY); SSF55486 (SUPERFAMILY); IPR000859 (SUPERFAMILY)                                                                                                                                                                                                                                                                                                                             |
| 2099 | 300912_length_2149_cvg_12.4_tip_1_1 | 314  | meprin a                                                 | 716 | 5.34E-55  | 54.60% | 0.112   | IPR002018 (PFAM); IPR029058 (G3DSA:3.40.50.GENE3D); PTHR11559 (PANTHER); IPR019819 (PROSITE_PATTERNS); IPR019826 (PROSITE_PATTERNS); CYTOPLASMIC_DOMAIN (PHOBIUS); TRANSMEMBRANE (PHOBIUS); TRANSMEMBRANE (PHOBIUS); NON_CYTOPLASMIC_DOMAIN (PHOBIUS); NON_CYTOPLASMIC_DOMAIN (PHOBIUS); IPR029058 (SUPERFAMILY)                                                                                                                                                                                                                                                                                                                                               |
| 2100 | 300920_length_2152_cvg_9.0_tip_1_1  | 300  | venom carboxylesterase-6 isoform x2                      | 717 | 9.59E-138 | 58.20% | 0.144   | IPR019791 (PRINTS); IPR019791 (PFAM); IPR019791 (G3DSA:1.10.640.GENE3D); PTHR11475 (PANTHER); IPR019791 (PROSITE_PROFILES); IPR010255 (SUPERFAMILY)                                                                                                                                                                                                                                                                                                                                                                                                                                                                                                            |
| 2101 | 300926_length_2153_cvg_25.3_tip_1_5 | 690  | chorion peroxidase-like                                  | 717 | 4.63E-166 | 59.50% | 0.211   | IPR002172 (PRINTS); IPR000998 (SMART); IPR002172 (SMART); IPR002172 (G3DSA:4.10.400.GENE3D); IPR002172 (PFAM); IPR000998 (PFAM); IPR002172 (G3DSA:4.10.400.GENE3D); IPR002172 (G3DSA:4.10.400.GENE3D); PTHR23282 (PANTHER); IPR023415 (PROSITE_PATTERNS); IPR023415 (PROSITE_PATTERNS); IPR000998 (PROSITE_PROFILES); IPR000998 (PROSITE_PROFILES); IPR002172 (PROSITE_PROFILES); IPR002172 (PROSITE_PROFILES); IPR002172 (PROSITE_PROFILES); IPR000998 (PROSITE_PROFILES); IPR002172 (SUPERFAMILY); IPR013320 (SUPERFAMILY); IPR002172 (SUPERFAMILY); IPR013320 (SUPERFAMILY); IPR013320 (SUPERFAMILY); IPR002172 (SUPERFAMILY); IPR013320 (SUPERFAMILY)      |
| 2102 | 300936_length_2156_cvg_11.1_tip_1_5 | 231  | mam and ldl-receptor class a domain-containing protein 1 | 718 | 2.40E-152 | 54.50% | 0.152   | IPR000734 (PRINTS); IPR029058 (G3DSA:3.40.50.GENE3D); IPR013818 (PFAM); PTHR11610:SF41 (PANTHER); IPR000734 (PANTHER); TRANSMEMBRANE (PHOBIUS); NON_CYTOPLASMIC_DOMAIN (PHOBIUS); CYTOPLASMIC_DOMAIN (PHOBIUS); IPR029058 (SUPERFAMILY)                                                                                                                                                                                                                                                                                                                                                                                                                        |
| 2103 | 300950_length_2165_cvg_27.8_tip_1_0 | 964  | pancreatic lipase-related protein 1                      | 722 | 4.88E-102 | 55.40% | 0.146   | Coil (COILS); IPR013781 (G3DSA:3.20.20.GENE3D); IPR001547 (PFAM); PTHR31308 (PANTHER); NON_CYTOPLASMIC_DOMAIN (PHOBIUS); TRANSMEMBRANE (PHOBIUS); TRANSMEMBRANE (PHOBIUS); CYTOPLASMIC_DOMAIN (PHOBIUS); NON_CYTOPLASMIC_DOMAIN (PHOBIUS); IPR017853 (SUPERFAMILY)                                                                                                                                                                                                                                                                                                                                                                                             |
| 2104 | 300952_length_2166_cvg_9.7_tip_1_1  | 259  | glycoside catalytic core                                 | 722 | 5.33E-94  | 53.40% | 0.282   | Coil (COILS); IPR002312 (PRINTS); IPR004364 (PFAM); IPR004523 (TIGRFAM); IPR004365 (PFAM); G3DSA:3.30.930.10 (GENE3D); IPR012340 (G3DSA:2.40.50.GENE3D); IPR018150 (PANTHER); IPR004523 (PTHR22594:PANTHER); TRANSMEMBRANE (PHOBIUS); TRANSMEMBRANE (PHOBIUS); CYTOPLASMIC_DOMAIN (PHOBIUS); CYTOPLASMIC_DOMAIN (PHOBIUS); TRANSMEMBRANE (PHOBIUS); NON_CYTOPLASMIC_DOMAIN (PHOBIUS); NON_CYTOPLASMIC_DOMAIN (PHOBIUS); IPR006195 (PROSITE_PROFILES); SSF55681 (SUPERFAMILY); IPR012340 (SUPERFAMILY)                                                                                                                                                          |
| 2105 | 300958_length_2172_cvg_14.7_tip_1_1 | 404  | aspartate--trna cytoplasmic                              | 724 | 0         | 85.30% | 0.202   | PR00421 (PRINTS); IPR005792 (TIGRFAM); IPR013766 (PFAM); IPR012336 (G3DSA:3.40.30.GENE3D); IPR012336 (G3DSA:3.40.30.GENE3D); IPR012336 (G3DSA:3.40.30.GENE3D); IPR005788 (TIGRFAM); PF13848 (PFAM); PTHR18929 (PANTHER); PTHR18929:SF60 (PANTHER); IPR017937 (PROSITE_PATTERNS); IPR017937 (PROSITE_PATTERNS); IPR012336 (PROSITE_PROFILES); IPR012336 (PROSITE_PROFILES); IPR012336 (SUPERFAMILY); IPR012336 (SUPERFAMILY); IPR012336 (SUPERFAMILY); IPR012336 (SUPERFAMILY); IPR012336 (SUPERFAMILY)                                                                                                                                                         |
| 2106 | 300970_length_2176_cvg_57.7_tip_1_2 | 3229 | protein disulfide-isomerase a3                           | 725 | 0         | 78.20% | 0.361 Y |                                                                                                                                                                                                                                                                                                                                                                                                                                                                                                                                                                                                                                                                |

|      |                                     |       |                                  |     |           |        |       |                                                                                                                                                                                                                                                                                                                                                                                                                                                                                                                                                                                  |
|------|-------------------------------------|-------|----------------------------------|-----|-----------|--------|-------|----------------------------------------------------------------------------------------------------------------------------------------------------------------------------------------------------------------------------------------------------------------------------------------------------------------------------------------------------------------------------------------------------------------------------------------------------------------------------------------------------------------------------------------------------------------------------------|
| 2107 | 301014_length_2199_cvg_27.2_tip_1_4 | 725   | latrophilin cir1-like isoform x1 | 733 | 6.32E-175 | 59.10% | 0.232 | Coil (COILS); IPR000832 (PRINTS); IPR000832 (PFAM); PTHR12011:SF258 (PANTHER); PTHR12011 (PANTHER); IPR017983 (PROSITE_PATTERNS); NON_CYTOPLASMIC_DOMAIN (PHOBIUS); TRANSMEMBRANE (PHOBIUS); CYTOPLASMIC_DOMAIN (PHOBIUS); TRANSMEMBRANE (PHOBIUS); TRANSMEMBRANE (PHOBIUS); TRANSMEMBRANE (PHOBIUS); NON_CYTOPLASMIC_DOMAIN (PHOBIUS); NON_CYTOPLASMIC_DOMAIN (PHOBIUS); CYTOPLASMIC_DOMAIN (PHOBIUS); TRANSMEMBRANE (PHOBIUS); CYTOPLASMIC_DOMAIN (PHOBIUS); IPR017981 (PROSITE_PROFILES); TMhelix (TMHMM); TMhelix (TMHMM); TMhelix (TMHMM); TMhelix (TMHMM); TMhelix (TMHMM) |
| 2119 | 301180_length_2269_cvg_73.3_tip_1_2 | 18195 | chitinase 1 precursor            | 735 | 0         | 69.50% | 0.117 | IPR011583 (SMART); IPR002557 (SMART); IPR002557 (G3DSA:2.170.140.GENE3D); IPR029070 (G3DSA:3.10.50.GENE3D); IPR001223 (PFAM); IPR013781 (G3DSA:3.20.20.GENE3D); IPR002557 (PFAM); PTHR11177:SF144 (PANTHER); PTHR11177 (PANTHER); NON_CYTOPLASMIC_DOMAIN (PHOBIUS); CYTOPLASMIC_DOMAIN (PHOBIUS); TRANSMEMBRANE (PHOBIUS); IPR002557 (PROSITE_PROFILES); IPR002557 (SUPERFAMILY); IPR017853 (SUPERFAMILY); IPR029070 (SUPERFAMILY)                                                                                                                                               |
| 2108 | 301068_length_2224_cvg_22.6_tip_1_2 | 680   | lysine--trna ligase isoform x2   | 741 | 0         | 86.20% | 0.108 | Coil (COILS); IPR018149 (PRINTS); IPR004365 (PFAM); IPR002313 (TIGRFAM); IPR012340 (G3DSA:2.40.50.GENE3D); IPR004364 (PFAM); G3DSA:3.30.930.10 (GENE3D); PTHR22594:SF4 (PANTHER); IPR018150 (PANTHER); NON_CYTOPLASMIC_DOMAIN (PHOBIUS); TRANSMEMBRANE (PHOBIUS); TRANSMEMBRANE (PHOBIUS); NON_CYTOPLASMIC_DOMAIN (PHOBIUS); CYTOPLASMIC_DOMAIN (PHOBIUS); IPR006195 (PROSITE_PROFILES); IPR002313 (HAMAP); IPR012340 (SUPERFAMILY); SSF55681 (SUPERFAMILY); TMhelix (TMHMM); TMhelix (TMHMM)                                                                                    |
| 2109 | 301072_length_2225_cvg_19.7_tip_1_2 | 631   | delta -sterol reductase          | 741 | 0         | 78.60% | 0.151 | IPR006094 (PFAM); IPR016169 (G3DSA:3.30.465.GENE3D); PTHR10801 (PANTHER); CYTOPLASMIC_DOMAIN (PHOBIUS); NON_CYTOPLASMIC_DOMAIN (PHOBIUS); TRANSMEMBRANE (PHOBIUS); TRANSMEMBRANE (PHOBIUS); NON_CYTOPLASMIC_DOMAIN (PHOBIUS); CYTOPLASMIC_DOMAIN (PHOBIUS); NON_CYTOPLASMIC_DOMAIN (PHOBIUS); TRANSMEMBRANE (PHOBIUS); TRANSMEMBRANE (PHOBIUS); CYTOPLASMIC_DOMAIN (PHOBIUS); TRANSMEMBRANE (PHOBIUS); IPR016166 (PROSITE_PROFILES); IPR016164 (SUPERFAMILY); IPR016166 (SUPERFAMILY); TMhelix (TMHMM)                                                                           |
| 2110 | 301076_length_2228_cvg_47.9_tip_0_5 | 1944  | plasma alpha-l-fucosidase        | 742 | 0         | 78.50% | 0.102 | IPR016286 (PRINTS); IPR000933 (SMART); IPR000933 (PFAM); IPR013780 (G3DSA:2.60.40.GENE3D); IPR013781 (G3DSA:3.20.20.GENE3D); PTHR10030:SF26 (PANTHER); IPR000933 (PANTHER); IPR018526 (PROSITE_PATTERNS); TRANSMEMBRANE (PHOBIUS); CYTOPLASMIC_DOMAIN (PHOBIUS); TRANSMEMBRANE (PHOBIUS); TRANSMEMBRANE (PHOBIUS); NON_CYTOPLASMIC_DOMAIN (PHOBIUS); CYTOPLASMIC_DOMAIN (PHOBIUS); NON_CYTOPLASMIC_DOMAIN (PHOBIUS); TRANSMEMBRANE (PHOBIUS); CYTOPLASMIC_DOMAIN (PHOBIUS); TRANSMEMBRANE (PHOBIUS); NON_CYTOPLASMIC_DOMAIN (PHOBIUS); IPR017853 (SUPERFAMILY)                   |
| 2111 | 301078_length_2228_cvg_9.2_tip_1_2  | 368   | PREDICTED: mucin-5AC-like        | 742 | 1.26E-07  | 52.25% | 0.169 | TRANSMEMBRANE (PHOBIUS); TRANSMEMBRANE (PHOBIUS); CYTOPLASMIC_DOMAIN (PHOBIUS); TRANSMEMBRANE (PHOBIUS); NON_CYTOPLASMIC_DOMAIN (PHOBIUS); NON_CYTOPLASMIC_DOMAIN (PHOBIUS); TRANSMEMBRANE (PHOBIUS); TRANSMEMBRANE (PHOBIUS); TRANSMEMBRANE (PHOBIUS); CYTOPLASMIC_DOMAIN (PHOBIUS); CYTOPLASMIC_DOMAIN (PHOBIUS); NON_CYTOPLASMIC_DOMAIN (PHOBIUS); CYTOPLASMIC_DOMAIN (PHOBIUS); TMhelix (TMHMM); TMhelix (TMHMM); TMhelix (TMHMM); TMhelix (TMHMM)                                                                                                                           |
| 2112 | 301086_length_2233_cvg_3.8_tip_1_2  | 145   | cd109 antigen                    | 744 | 0         | 63.20% | 0.187 | IPR002172 (SMART); IPR002172 (G3DSA:4.10.400.GENE3D); IPR011626 (PFAM); IPR008930 (G3DSA:1.50.10.GENE3D); IPR001599 (PFAM); PTHR11412 (PANTHER); PTHR11412:SF85 (PANTHER); IPR002172 (PROSITE_PROFILES); IPR002172 (SUPERFAMILY); IPR008930 (SUPERFAMILY)                                                                                                                                                                                                                                                                                                                        |
| 2113 | 301098_length_2237_cvg_9.9_tip_1_3  | 265   | trehalase-like isoform x1        | 746 | 0         | 69.40% | 0.128 | IPR001661 (PRINTS); IPR001661 (PFAM); IPR001661 (PANTHER); PTHR23403:SF1 (PANTHER); IPR018232 (PROSITE_PATTERNS); IPR018232 (PROSITE_PATTERNS); CYTOPLASMIC_DOMAIN (PHOBIUS); TRANSMEMBRANE (PHOBIUS); NON_CYTOPLASMIC_DOMAIN (PHOBIUS); TRANSMEMBRANE (PHOBIUS); CYTOPLASMIC_DOMAIN (PHOBIUS); IPR008928 (SUPERFAMILY)                                                                                                                                                                                                                                                          |



|      |                                     |      |                                                   |     |           |        |       |                                                                                                                                                                                                                                                                                                                                                                                                                                                                                                                                                                                                                                                                           |
|------|-------------------------------------|------|---------------------------------------------------|-----|-----------|--------|-------|---------------------------------------------------------------------------------------------------------------------------------------------------------------------------------------------------------------------------------------------------------------------------------------------------------------------------------------------------------------------------------------------------------------------------------------------------------------------------------------------------------------------------------------------------------------------------------------------------------------------------------------------------------------------------|
| 2122 | 301208_length_2285_cvg_27.5_tip_1_0 | 786  | cytochrome p450                                   | 762 | 0         | 70.00% | 0.33  | Coil (COILS); IPR002401 (PRINTS); IPR001128 (PRINTS); IPR001128 (PFAM); IPR001128 (G3DSA:1.10.630.GENE3D); PTHR24290 (PANTHER); PTHR24290:SF0 (PANTHER); IPR017972 (PROSITE_PATTERNS); SIGNAL_PEPTIDE_N_REGION (PHOBIUS); TRANSMEMBRANE (PHOBIUS); NON_CYTOPLASMIC_DOMAIN (PHOBIUS); SIGNAL_PEPTIDE_C_REGION (PHOBIUS); SIGNAL_PEPTIDE (PHOBIUS); CYTOPLASMIC_DOMAIN (PHOBIUS); SIGNAL_PEPTIDE_H_REGION (PHOBIUS); IPR001128 (SUPERFAMILY)                                                                                                                                                                                                                                |
| 2123 | 301226_length_2292_cvg_59.1_tip_1_0 | 4430 | heat shock 70 kda protein cognate 4               | 764 | 0         | 94.40% | 0.242 | Coil (COILS); IPR013126 (PRINTS); IPR029048 (G3DSA:1.20.1270.GENE3D); IPR029047 (G3DSA:2.60.34.GENE3D); G3DSA:3.90.640.10 (GENE3D); G3DSA:3.30.420.40 (GENE3D); G3DSA:3.30.30.30 (GENE3D); IPR013126 (PFAM); G3DSA:3.30.420.40 (GENE3D); PTHR19375:SF142 (PANTHER); PTHR19375 (PANTHER); IPR018181 (PROSITE_PATTERNS); IPR018181 (PROSITE_PATTERNS); IPR018181 (PROSITE_PATTERNS); NON_CYTOPLASMIC_DOMAIN (PHOBIUS); TRANSMEMBRANE (PHOBIUS); CYTOPLASMIC_DOMAIN (PHOBIUS); NON_CYTOPLASMIC_DOMAIN (PHOBIUS); TRANSMEMBRANE (PHOBIUS); IPR029048 (SUPERFAMILY); SSF53067 (SUPERFAMILY); SSF53067 (SUPERFAMILY); IPR029047 (SUPERFAMILY); TMhelix (TMHMM); TMhelix (TMHMM) |
| 2124 | 301230_length_2293_cvg_11.9_tip_1_3 | 377  | arylsulfatase b                                   | 765 | 9.74E-173 | 64.80% | 0.223 | IPR017849 (G3DSA:3.40.720.GENE3D); G3DSA:3.30.1120.10 (GENE3D); IPR000917 (PFAM); PTHR10342:SF206 (PANTHER); PTHR10342 (PANTHER); IPR024607 (PROSITE_PATTERNS); IPR024607 (PROSITE_PATTERNS); NON_CYTOPLASMIC_DOMAIN (PHOBIUS); TRANSMEMBRANE (PHOBIUS); TRANSMEMBRANE (PHOBIUS); CYTOPLASMIC_DOMAIN (PHOBIUS); TRANSMEMBRANE (PHOBIUS); CYTOPLASMIC_DOMAIN (PHOBIUS); NON_CYTOPLASMIC_DOMAIN (PHOBIUS); IPR017850 (SUPERFAMILY); TMhelix (TMHMM)                                                                                                                                                                                                                         |
| 2125 | 301238_length_2297_cvg_18.9_tip_1_3 | 536  | utp--glucose-1-phosphate uridylyltransferase-like | 766 | 0         | 84.40% | 0.11  | IPR002618 (PFAM); IPR029044 (G3DSA:3.90.550.GENE3D); IPR002618 (PANTHER); IPR016267 (PTHR11952:PANTHER); TRANSMEMBRANE (PHOBIUS); CYTOPLASMIC_DOMAIN (PHOBIUS); NON_CYTOPLASMIC_DOMAIN (PHOBIUS); TRANSMEMBRANE (PHOBIUS); NON_CYTOPLASMIC_DOMAIN (PHOBIUS); IPR029044 (SUPERFAMILY); TMhelix (TMHMM); TMhelix (TMHMM)                                                                                                                                                                                                                                                                                                                                                    |
| 2126 | 301244_length_2298_cvg_6.9_tip_1_5  | 205  | phospholipase a-2-activating protein              | 766 | 0         | 66.50% | 0.119 | IPR001680 (SMART); IPR001680 (PFAM); IPR015155 (PFAM); IPR013535 (PFAM); IPR015943 (G3DSA:2.130.10.GENE3D); PTHR19849 (PANTHER); PTHR19849:SF0 (PANTHER); IPR017986 (PROSITE_PROFILES); IPR001680 (PROSITE_PROFILES); IPR001680 (PROSITE_PROFILES); IPR001680 (PROSITE_PROFILES); IPR013535 (PROSITE_PROFILES); IPR015155 (PROSITE_PROFILES); IPR001680 (PROSITE_PROFILES); IPR017986 (SUPERFAMILY); IPR016024 (SUPERFAMILY)                                                                                                                                                                                                                                              |
| 2128 | 301254_length_2300_cvg_44.5_tip_1_5 | 1880 | contactin associated protein 1                    | 766 | 4.55E-61  | 50.00% | 0.153 | Coil (COILS); IPR001073 (SMART); IPR001073 (PFAM); IPR014716 (G3DSA:3.90.215.GENE3D); IPR008983 (G3DSA:2.60.120.GENE3D); PTHR10127 (PANTHER); PTHR10127:SF575 (PANTHER); TRANSMEMBRANE (PHOBIUS); CYTOPLASMIC_DOMAIN (PHOBIUS); CYTOPLASMIC_DOMAIN (PHOBIUS); TRANSMEMBRANE (PHOBIUS); NON_CYTOPLASMIC_DOMAIN (PHOBIUS); NON_CYTOPLASMIC_DOMAIN (PHOBIUS); TRANSMEMBRANE (PHOBIUS); NON_CYTOPLASMIC_DOMAIN (PHOBIUS); TRANSMEMBRANE (PHOBIUS); IPR001073 (PROSITE_PROFILES); IPR008983 (SUPERFAMILY); IPR002181 (SUPERFAMILY); TMhelix (TMHMM); TMhelix (TMHMM); TMhelix (TMHMM)                                                                                          |
| 2127 | 301248_length_2299_cvg_64.0_tip_1_3 | 4342 | meprin a                                          | 767 | 3.73E-38  | 48.80% | 0.097 | IPR000859 (SMART); IPR001506 (PFAM); IPR000859 (G3DSA:2.60.120.GENE3D); IPR024079 (G3DSA:3.40.390.GENE3D); IPR000859 (G3DSA:2.60.120.GENE3D); IPR000859 (PFAM); PTHR10127 (PANTHER); PTHR10127:SF580 (PANTHER); TRANSMEMBRANE (PHOBIUS); TRANSMEMBRANE (PHOBIUS); NON_CYTOPLASMIC_DOMAIN (PHOBIUS); CYTOPLASMIC_DOMAIN (PHOBIUS); NON_CYTOPLASMIC_DOMAIN (PHOBIUS); TRANSMEMBRANE (PHOBIUS); TRANSMEMBRANE (PHOBIUS); CYTOPLASMIC_DOMAIN (PHOBIUS); IPR000859 (PROSITE_PROFILES); IPR000859 (SUPERFAMILY); IPR000859 (SUPERFAMILY); SSF55486 (SUPERFAMILY); TMhelix (TMHMM); TMhelix (TMHMM); TMhelix (TMHMM)                                                             |



|      |                                     |      |                                              |     |           |        |       |                                                                                                                                                                                                                                                                                                                                                                                                                                                                                                                                                                                                                                                                                                                                                                                                                                                                                                                                                  |
|------|-------------------------------------|------|----------------------------------------------|-----|-----------|--------|-------|--------------------------------------------------------------------------------------------------------------------------------------------------------------------------------------------------------------------------------------------------------------------------------------------------------------------------------------------------------------------------------------------------------------------------------------------------------------------------------------------------------------------------------------------------------------------------------------------------------------------------------------------------------------------------------------------------------------------------------------------------------------------------------------------------------------------------------------------------------------------------------------------------------------------------------------------------|
| 2129 | 301268_length_2304_cvg_6.9_tip_1_2  | 191  | low density lipoprotein                      | 768 | 0         | 64.70% | 0.102 | IPR000742 (SMART); IPR002223 (SMART); IPR001881 (SMART); IPR006605 (SMART); IPR003886 (SMART); IPR023413 (G3DSA:2.40.155.GENE3D); IPR002223 (G3DSA:4.10.410.GENE3D); IPR002223 (PFAM); IPR001881 (PFAM); G3DSA:2.10.25.10 (GENE3D); G3DSA:2.10.25.10 (GENE3D); IPR006605 (PFAM); IPR003886 (PFAM); PTHR11339 (PANTHER); IPR013032 (PROSITE_PATTERNS); IPR000152 (PROSITE_PATTERNS); IPR018097 (PROSITE_PATTERNS); IPR013032 (PROSITE_PATTERNS); IPR000152 (PROSITE_PATTERNS); IPR013032 (PROSITE_PATTERNS); TRANSMEMBRANE (PHOBIUS); CYTOPLASMIC_DOMAIN (PHOBIUS); NON_CYTOPLASMIC_DOMAIN (PHOBIUS); IPR000742 (PROSITE_PROFILES); IPR000742 (PROSITE_PROFILES); IPR002223 (PROSITE_PROFILES); IPR000742 (PROSITE_PROFILES); IPR006605 (PROSITE_PROFILES); IPR003886 (PROSITE_PROFILES); IPR000742 (PROSITE_PROFILES); SSF57196 (SUPERFAMILY); SSF57196 (SUPERFAMILY); IPR002223 (SUPERFAMILY); IPR009030 (SUPERFAMILY); IPR009017 (SUPERFAMILY) |
| 2130 | 301286_length_2313_cvg_16.0_tip_1_1 | 407  | exocyst complex component 6b-like isoform 2  | 771 | 0         | 80.60% | 0.098 | Coil (COILS); Coil (COILS); Coil (COILS); IPR007225 (PIRSF); IPR007225 (PFAM); IPR007225 (PANTHER); CYTOPLASMIC_DOMAIN (PHOBIUS); TRANSMEMBRANE (PHOBIUS); NON_CYTOPLASMIC_DOMAIN (PHOBIUS); TMhelix (TMHMM)                                                                                                                                                                                                                                                                                                                                                                                                                                                                                                                                                                                                                                                                                                                                     |
| 2131 | 301300_length_2323_cvg_11.0_tip_1_5 | 359  | phenoloxidase subunit a3-like                | 774 | 0         | 67.40% | 0.19  | IPR013788 (PRINTS); IPR008922 (G3DSA:1.10.1280.GENE3D); IPR005204 (G3DSA:1.20.1370.GENE3D); IPR005203 (G3DSA:2.60.40.GENE3D); IPR005204 (PFAM); IPR000896 (PFAM); IPR005203 (PFAM); IPR013788 (PANTHER); PTHR11511:SF24 (PANTHER); IPR002227 (PROSITE_PATTERNS); IPR013788 (PROSITE_PATTERNS); IPR013788 (PROSITE_PATTERNS); IPR005204 (SUPERFAMILY); IPR008922 (SUPERFAMILY); IPR014756 (SUPERFAMILY)                                                                                                                                                                                                                                                                                                                                                                                                                                                                                                                                           |
| 2132 | 301304_length_2324_cvg_38.4_tip_1_4 | 1036 | lim domain-binding protein 3                 | 775 | 1.25E-107 | 72.40% | 0.327 | IPR001781 (SMART); IPR001781 (G3DSA:2.10.110.GENE3D); IPR001781 (PFAM); IPR001781 (G3DSA:2.10.110.GENE3D); IPR001781 (G3DSA:2.10.110.GENE3D); PTHR24214:SF29 (PANTHER); PTHR24214 (PANTHER); IPR001781 (PROSITE_PATTERNS); IPR001781 (PROSITE_PATTERNS); TRANSMEMBRANE (PHOBIUS); TRANSMEMBRANE (PHOBIUS); NON_CYTOPLASMIC_DOMAIN (PHOBIUS); CYTOPLASMIC_DOMAIN (PHOBIUS); TRANSMEMBRANE (PHOBIUS); TRANSMEMBRANE (PHOBIUS); CYTOPLASMIC_DOMAIN (PHOBIUS); NON_CYTOPLASMIC_DOMAIN (PHOBIUS); NON_CYTOPLASMIC_DOMAIN (PHOBIUS); IPR001781 (PROSITE_PROFILES); IPR001781 (PROSITE_PROFILES); IPR001781 (PROSITE_PROFILES); SignalP-TM (SIGNALP_GRAM_POSITIVE); SignalP-noTM (SIGNALP_GRAM_NEGATIVE); SSF57716 (SUPERFAMILY); SSF57716 (SUPERFAMILY); SSF57716 (SUPERFAMILY); TMhelix (TMHMM); TMhelix (TMHMM); TMhelix (TMHMM); TMhelix (TMHMM)                                                                                                    |
| 2135 | 301410_length_2391_cvg_17.2_tip_1_2 | 530  | 14-3-3 protein epsilon                       | 792 | 9.52E-164 | 95.40% | 0.118 | Coil (COILS); IPR000308 (PRINTS); IPR023410 (SMART); G3DSA:1.20.190.20 (GENE3D); IPR023410 (PFAM); IPR000308 (PANTHER); IPR023409 (PROSITE_PATTERNS); IPR023409 (PROSITE_PATTERNS); NON_CYTOPLASMIC_DOMAIN (PHOBIUS); NON_CYTOPLASMIC_DOMAIN (PHOBIUS); CYTOPLASMIC_DOMAIN (PHOBIUS); TRANSMEMBRANE (PHOBIUS); TRANSMEMBRANE (PHOBIUS); IPR023410 (SUPERFAMILY)                                                                                                                                                                                                                                                                                                                                                                                                                                                                                                                                                                                  |
| 2133 | 301394_length_2381_cvg_45.2_tip_1_0 | 1629 | superoxide dismutase soluble                 | 794 | 3.91E-42  | 55.10% | 0.109 | IPR001424 (PRINTS); IPR001424 (G3DSA:2.60.40.GENE3D); IPR001424 (PFAM); IPR018152 (PROSITE_PATTERNS); IPR001424 (SUPERFAMILY)                                                                                                                                                                                                                                                                                                                                                                                                                                                                                                                                                                                                                                                                                                                                                                                                                    |
| 2134 | 301396_length_2383_cvg_7.3_tip_1_0  | 276  | n-acetylated-alpha-linked acidic dipeptidase | 795 | 0         | 59.30% | 0.21  | G3DSA:3.50.30.30 (GENE3D); G3DSA:3.40.630.10 (GENE3D); IPR003137 (PFAM); IPR007365 (G3DSA:1.20.930.GENE3D); IPR007484 (PFAM); IPR007365 (PFAM); PTHR10404 (PANTHER); CYTOPLASMIC_DOMAIN (PHOBIUS); TRANSMEMBRANE (PHOBIUS); TRANSMEMBRANE (PHOBIUS); NON_CYTOPLASMIC_DOMAIN (PHOBIUS); NON_CYTOPLASMIC_DOMAIN (PHOBIUS); SSF52025 (SUPERFAMILY); IPR007365 (SUPERFAMILY); SSF53187 (SUPERFAMILY); TMhelix (TMHMM)                                                                                                                                                                                                                                                                                                                                                                                                                                                                                                                                |
| 2136 | 301416_length_2394_cvg_44.8_tip_1_3 | 1520 | chorion peroxidase-like                      | 798 | 2.88E-133 | 55.30% | 0.103 | IPR019791 (PRINTS); IPR019791 (PFAM); IPR019791 (G3DSA:1.10.640.GENE3D); PTHR11475 (PANTHER); TRANSMEMBRANE (PHOBIUS); TRANSMEMBRANE (PHOBIUS); NON_CYTOPLASMIC_DOMAIN (PHOBIUS); CYTOPLASMIC_DOMAIN (PHOBIUS); NON_CYTOPLASMIC_DOMAIN (PHOBIUS); IPR019791 (PROSITE_PROFILES); IPR010255 (SUPERFAMILY); TMhelix (TMHMM); TMhelix (TMHMM)                                                                                                                                                                                                                                                                                                                                                                                                                                                                                                                                                                                                        |

|      |                                     |        |                                           |     |           |        |         |                                                                                                                                                                                                                                                                                                                                                                                                                                                                                                    |
|------|-------------------------------------|--------|-------------------------------------------|-----|-----------|--------|---------|----------------------------------------------------------------------------------------------------------------------------------------------------------------------------------------------------------------------------------------------------------------------------------------------------------------------------------------------------------------------------------------------------------------------------------------------------------------------------------------------------|
| 2137 | 301422_length_2397_cvg_66.7_tip_1_3 | 123579 | myosin heavy chain isoform 3              | 799 | 0         | 91.70% | 0.101   | Coil (COILS); IPR002928 (PFAM); PTHR13140:SF364 (PANTHER); PTHR13140 (PANTHER); NON_CYTOPLASMIC_DOMAIN (PHOBIUS); CYTOPLASMIC_DOMAIN (PHOBIUS); TRANSMEMBRANE (PHOBIUS); SSF90257 (SUPERFAMILY); SSF90257 (SUPERFAMILY); TMhelix (TMHMM)                                                                                                                                           |
| 2138 | 301444_length_2425_cvg_52.0_tip_1_0 | 2386   | neutral ceramidase                        | 804 | 0         | 66.70% | 0.145   | IPR006823 (PFAM); IPR006823 (PANTHER); PTHR12670:SF1 (PANTHER); CYTOPLASMIC_DOMAIN (PHOBIUS); TRANSMEMBRANE (PHOBIUS); NON_CYTOPLASMIC_DOMAIN (PHOBIUS); TRANSMEMBRANE (PHOBIUS); NON_CYTOPLASMIC_DOMAIN (PHOBIUS)                                                                                                                                                                                                                                                                                 |
| 2139 | 301468_length_2441_cvg_6.1_tip_1_0  | 200    | sphingomyelin partial                     | 814 | 0         | 76.30% | 0.119   | IPR008139 (SMART); IPR029052 (G3DSA:3.60.21.GENE3D); IPR004843 (PFAM); IPR011001 (G3DSA:1.10.225.GENE3D); PTHR10340:SF13 (PANTHER); PTHR10340 (PANTHER); CYTOPLASMIC_DOMAIN (PHOBIUS); TRANSMEMBRANE (PHOBIUS); TRANSMEMBRANE (PHOBIUS); TRANSMEMBRANE (PHOBIUS); NON_CYTOPLASMIC_DOMAIN (PHOBIUS); NON_CYTOPLASMIC_DOMAIN (PHOBIUS); CYTOPLASMIC_DOMAIN (PHOBIUS); IPR008139 (PROSITE_PROFILES); IPR029052 (SUPERFAMILY); IPR011001 (SUPERFAMILY); TMhelix (TMHMM)                                |
| 2140 | 301494_length_2460_cvg_21.3_tip_1_5 | 650    | low quality protein: mucin-5b-like        | 820 | 4.27E-08  | 56.33% | 0.102   | no IPS match                                                                                                                                                                                                                                                                                                                                                                                                                                                                                       |
| 2141 | 301498_length_2461_cvg_43.9_tip_1_3 | 1459   | heat shock 70 kda protein cognate 5       | 821 | 0         | 89.00% | 0.158   | Coil (COILS); IPR013126 (PRINTS); IPR012725 (TIGRFAM); G3DSA:3.30.420.40 (GENE3D); G3DSA:3.30.30.30 (GENE3D); IPR029048 (G3DSA:1.20.1270.GENE3D); G3DSA:3.30.420.40 (GENE3D); IPR013126 (PFAM); IPR029047 (G3DSA:2.60.34.GENE3D); G3DSA:3.90.640.10 (GENE3D); PTHR19375:SF173 (PANTHER); PTHR19375 (PANTHER); IPR018181 (PROSITE_PATTERNS); IPR018181 (PROSITE_PATTERNS); IPR018181 (PROSITE_PATTERNS); IPR012725 (HAMAP); SSF53067 (SUPERFAMILY); IPR029047 (SUPERFAMILY); SSF53067 (SUPERFAMILY) |
| 2142 | 301512_length_2469_cvg_14.7_tip_1_1 | 424    | sel1l protein                             | 823 | 0         | 77.80% | 0.298   | Coil (COILS); IPR006597 (SMART); IPR011990 (G3DSA:1.25.40.GENE3D); IPR006597 (PFAM); IPR011990 (G3DSA:1.25.40.GENE3D); PTHR11102 (PANTHER); PTHR11102:SF55 (PANTHER); NON_CYTOPLASMIC_DOMAIN (PHOBIUS); TRANSMEMBRANE (PHOBIUS); CYTOPLASMIC_DOMAIN (PHOBIUS); CYTOPLASMIC_DOMAIN (PHOBIUS); TRANSMEMBRANE (PHOBIUS); SSF81901 (SUPERFAMILY); SSF81901 (SUPERFAMILY); SSF81901 (SUPERFAMILY); TMhelix (TMHMM); TMhelix (TMHMM)                                                                     |
| 2143 | 301528_length_2475_cvg_23.6_tip_1_2 | 609    | superoxide dismutase                      | 825 | 2.56E-61  | 67.40% | 0.184   | IPR001424 (PRINTS); IPR001424 (PFAM); IPR001424 (G3DSA:2.60.40.GENE3D); PTHR10003 (PANTHER); IPR018152 (PROSITE_PATTERNS); IPR018152 (PROSITE_PATTERNS); TRANSMEMBRANE (PHOBIUS); NON_CYTOPLASMIC_DOMAIN (PHOBIUS); CYTOPLASMIC_DOMAIN (PHOBIUS); IPR001424 (SUPERFAMILY); TMhelix (TMHMM)                                                                                                                                                                                                         |
| 2144 | 301546_length_2486_cvg_36.1_tip_1_4 | 1031   | glucose dehydrogenase                     | 829 | 0         | 65.90% | 0.131   | IPR000172 (PFAM); IPR007867 (PFAM); G3DSA:3.50.50.60 (GENE3D); PTHR11552:SF77 (PANTHER); PTHR11552 (PANTHER); IPR000172 (PROSITE_PATTERNS); IPR000172 (PROSITE_PATTERNS); CYTOPLASMIC_DOMAIN (PHOBIUS); TRANSMEMBRANE (PHOBIUS); NON_CYTOPLASMIC_DOMAIN (PHOBIUS); NON_CYTOPLASMIC_DOMAIN (PHOBIUS); TRANSMEMBRANE (PHOBIUS); SSF51905 (SUPERFAMILY); TMhelix (TMHMM)                                                                                                                              |
| 2145 | 301572_length_2497_cvg_29.2_tip_1_1 | 956    | cytochrome p450 6k1-like                  | 832 | 2.20E-129 | 59.20% | 0.152   | IPR001128 (PRINTS); IPR002401 (PRINTS); IPR001128 (G3DSA:1.10.630.GENE3D); IPR001128 (PFAM); PTHR24292 (PANTHER); PTHR24292:SF24 (PANTHER); IPR017972 (PROSITE_PATTERNS); TRANSMEMBRANE (PHOBIUS); TRANSMEMBRANE (PHOBIUS); NON_CYTOPLASMIC_DOMAIN (PHOBIUS); CYTOPLASMIC_DOMAIN (PHOBIUS); TRANSMEMBRANE (PHOBIUS); CYTOPLASMIC_DOMAIN (PHOBIUS); NON_CYTOPLASMIC_DOMAIN (PHOBIUS); IPR001128 (SUPERFAMILY); TMhelix (TMHMM); TMhelix (TMHMM)                                                     |
| 2146 | 301582_length_2502_cvg_12.3_tip_1_2 | 561    | hemocyte protein-glutamine gamma- partial | 834 | 0         | 70.40% | 0.461 Y | IPR002931 (SMART); IPR013783 (G3DSA:2.60.40.GENE3D); IPR013783 (G3DSA:2.60.40.GENE3D); IPR008958 (PFAM); IPR023608 (PIRSF); IPR013783 (G3DSA:2.60.40.GENE3D); IPR001102 (PFAM); IPR002931 (PFAM); IPR002931 (G3DSA:3.90.260.GENE3D); PTHR11590:SF40 (PANTHER); IPR023608 (PANTHER); SignalP-noTM (SIGNALP_EUK); IPR008958 (SUPERFAMILY); IPR008958 (SUPERFAMILY); SSF54001 (SUPERFAMILY); IPR014756 (SUPERFAMILY)                                                                                  |

|      |                                     |       |                                                                      |     |          |        |       |                                                                                                                                                                                                                                                                                                                                                                                                                                                                                                                                                                                                                                                                                                                                                                                                                                                                                                                                                                                                                                                                 |
|------|-------------------------------------|-------|----------------------------------------------------------------------|-----|----------|--------|-------|-----------------------------------------------------------------------------------------------------------------------------------------------------------------------------------------------------------------------------------------------------------------------------------------------------------------------------------------------------------------------------------------------------------------------------------------------------------------------------------------------------------------------------------------------------------------------------------------------------------------------------------------------------------------------------------------------------------------------------------------------------------------------------------------------------------------------------------------------------------------------------------------------------------------------------------------------------------------------------------------------------------------------------------------------------------------|
| 2147 | 301596_length_2515_cvg_6.2_tip_1_3  | 224   | basement membrane-specific heparan sulfate proteoglycan core protein | 839 | 0        | 59.70% | 0.098 | IPR003599 (SMART); IPR003598 (SMART); IPR013106 (SMART); IPR013783 (G3DSA:2.60.40.GENE3D); IPR013032 (PFAM); IPR002049 (PFAM); IPR013783 (G3DSA:2.60.40.GENE3D); G3DSA:2.170.300.10 (GENE3D); PF13895 (PFAM); IPR013783 (G3DSA:2.60.40.GENE3D); IPR013783 (G3DSA:2.60.40.GENE3D); IPR013098 (PFAM); IPR013151 (PFAM); IPR013783 (G3DSA:2.60.40.GENE3D); PTHR10489 (PANTHER); IPR013032 (PROSITE_PATTERNS); IPR002049 (PROSITE_PATTERNS); IPR013032 (PROSITE_PATTERNS); IPR013032 (PROSITE_PATTERNS); IPR013032 (PROSITE_PATTERNS); IPR000742 (PROSITE_PROFILES); IPR007110 (PROSITE_PROFILES); IPR000742 (PROSITE_PROFILES); SSF48726 (SUPERFAMILY); SSF48726 (SUPERFAMILY) |
| 2148 | 301606_length_2520_cvg_9.9_tip_1_4  | 420   | arylsulfatase b                                                      | 840 | 0        | 72.00% | 0.248 | IPR000917 (PFAM); IPR017849 (G3DSA:3.40.720.GENE3D); G3DSA:3.30.1120.10 (GENE3D); PTHR10342 (PANTHER); PTHR10342:SF189 (PANTHER); IPR024607 (PROSITE_PATTERNS); IPR024607 (PROSITE_PATTERNS); NON_CYTOPLASMIC_DOMAIN (PHOBIUS); NON_CYTOPLASMIC_DOMAIN (PHOBIUS); TRANSMEMBRANE (PHOBIUS); CYTOPLASMIC_DOMAIN (PHOBIUS); CYTOPLASMIC_DOMAIN (PHOBIUS); TRANSMEMBRANE (PHOBIUS); CYTOPLASMIC_DOMAIN (PHOBIUS); TRANSMEMBRANE (PHOBIUS); TRANSMEMBRANE (PHOBIUS); NON_CYTOPLASMIC_DOMAIN (PHOBIUS); IPR017850 (SUPERFAMILY)                                                                                                                                                                                                                                                                                                                                                                                                                                                                                                                                       |
| 2149 | 301610_length_2521_cvg_31.4_tip_1_4 | 1290  | krueppel-like factor 10                                              | 840 | 1.41E-71 | 63.10% | 0.167 | IPR015880 (SMART); IPR013087 (G3DSA:3.30.160.GENE3D); PF13465 (PFAM); IPR013087 (G3DSA:3.30.160.GENE3D); PTHR23223:SF21 (PANTHER); PTHR23223 (PANTHER); IPR007087 (PROSITE_PATTERNS); IPR007087 (PROSITE_PATTERNS); IPR007087 (PROSITE_PATTERNS); TRANSMEMBRANE (PHOBIUS); NON_CYTOPLASMIC_DOMAIN (PHOBIUS); TRANSMEMBRANE (PHOBIUS); TRANSMEMBRANE (PHOBIUS); CYTOPLASMIC_DOMAIN (PHOBIUS); NON_CYTOPLASMIC_DOMAIN (PHOBIUS); TRANSMEMBRANE (PHOBIUS); TRANSMEMBRANE (PHOBIUS); NON_CYTOPLASMIC_DOMAIN (PHOBIUS); TRANSMEMBRANE (PHOBIUS); NON_CYTOPLASMIC_DOMAIN (PHOBIUS); CYTOPLASMIC_DOMAIN (PHOBIUS); CYTOPLASMIC_DOMAIN (PHOBIUS); IPR007087 (PROSITE_PROFILES); IPR007087 (PROSITE_PROFILES); SSF57667 (SUPERFAMILY); SSF57667 (SUPERFAMILY); TMhelix (TMHMM); TMhelix (TMHMM); TMhelix (TMHMM); TMhelix (TMHMM)                                                                                                                                                                                                                                        |
| 2150 | 301628_length_2531_cvg_7.6_tip_1_0  | 283   | atp-dependent zinc metalloprotease yme1 homolog                      | 844 | 0        | 75.30% | 0.27  | IPR003593 (SMART); IPR027417 (G3DSA:3.40.50.GENE3D); G3DSA:1.10.8.60 (GENE3D); IPR005936 (TIGRFAM); IPR003959 (PFAM); IPR000642 (PFAM); PTHR23076 (PANTHER); PTHR23076:SF37 (PANTHER); IPR003960 (PROSITE_PATTERNS); TRANSMEMBRANE (PHOBIUS); TRANSMEMBRANE (PHOBIUS); TRANSMEMBRANE (PHOBIUS); NON_CYTOPLASMIC_DOMAIN (PHOBIUS); CYTOPLASMIC_DOMAIN (PHOBIUS); CYTOPLASMIC_DOMAIN (PHOBIUS); CYTOPLASMIC_DOMAIN (PHOBIUS); NON_CYTOPLASMIC_DOMAIN (PHOBIUS); TRANSMEMBRANE (PHOBIUS); IPR005936 (HAMAP); SSF140990 (SUPERFAMILY); IPR027417 (SUPERFAMILY); TMhelix (TMHMM); TMhelix (TMHMM)                                                                                                                                                                                                                                                                                                                                                                                                                                                                    |
| 2151 | 301634_length_2535_cvg_44.7_tip_1_1 | 27594 | enolase                                                              | 845 | 0        | 89.50% | 0.3   | IPR000941 (PRINTS); IPR000941 (TIGRFAM); IPR020810 (PFAM); IPR029017 (G3DSA:3.30.390.GENE3D); IPR020811 (PFAM); IPR029065 (G3DSA:3.20.20.GENE3D); IPR000941 (PANTHER); IPR020809 (PROSITE_PATTERNS); CYTOPLASMIC_DOMAIN (PHOBIUS); CYTOPLASMIC_DOMAIN (PHOBIUS); TRANSMEMBRANE (PHOBIUS); TRANSMEMBRANE (PHOBIUS); NON_CYTOPLASMIC_DOMAIN (PHOBIUS); TRANSMEMBRANE (PHOBIUS); NON_CYTOPLASMIC_DOMAIN (PHOBIUS); TRANSMEMBRANE (PHOBIUS); CYTOPLASMIC_DOMAIN (PHOBIUS); TRANSMEMBRANE (PHOBIUS); NON_CYTOPLASMIC_DOMAIN (PHOBIUS); IPR000941 (HAMAP); IPR029065 (SUPERFAMILY); IPR029017 (SUPERFAMILY); TMhelix (TMHMM); TMhelix (TMHMM); TMhelix (TMHMM)                                                                                                                                                                                                                                                                                                                                                                                                        |

|      |                                     |      |                                      |     |           |        |         |                                                                                                                                                                                                                                                                                                                                                                                                                                                                                                                                                                                                                                                                                                                                                                                                                                                                                                                  |
|------|-------------------------------------|------|--------------------------------------|-----|-----------|--------|---------|------------------------------------------------------------------------------------------------------------------------------------------------------------------------------------------------------------------------------------------------------------------------------------------------------------------------------------------------------------------------------------------------------------------------------------------------------------------------------------------------------------------------------------------------------------------------------------------------------------------------------------------------------------------------------------------------------------------------------------------------------------------------------------------------------------------------------------------------------------------------------------------------------------------|
| 2152 | 301646_length_2550_cvg_6.2_tip_1_1  | 185  | protein disulfide-isomerase a4-like  | 850 | 8.02E-48  | 70.40% | 0.098   | IPR012336 (G3DSA:3.40.30.GENE3D); IPR013766 (PFAM); PTHR18929 (PANTHER); PTHR18929:SF56 (PANTHER); IPR017937 (PROSITE_PATTERNS); NON_CYTOPLASMIC_DOMAIN (PHOBIUS); NON_CYTOPLASMIC_DOMAIN (PHOBIUS); CYTOPLASMIC_DOMAIN (PHOBIUS); TRANSMEMBRANE (PHOBIUS); NON_CYTOPLASMIC_DOMAIN (PHOBIUS); TRANSMEMBRANE (PHOBIUS); TRANSMEMBRANE (PHOBIUS); CYTOPLASMIC_DOMAIN (PHOBIUS); CYTOPLASMIC_DOMAIN (PHOBIUS); TRANSMEMBRANE (PHOBIUS); IPR012336 (PROSITE_PROFILES); IPR012336 (SUPERFAMILY); TMhelix (TMHMM)                                                                                                                                                                                                                                                                                                                                                                                                      |
| 2153 | 301650_length_2551_cvg_19.9_tip_1_2 | 648  | growth differentiation factor 8-like | 850 | 1.07E-109 | 64.30% | 0.449 Y | IPR001839 (SMART); IPR029034 (G3DSA:2.10.90.GENE3D); IPR001111 (PFAM); IPR001839 (PFAM); PTHR11848:SF126 (PANTHER); IPR015615 (PANTHER); IPR017948 (PROSITE_PATTERNS); TRANSMEMBRANE (PHOBIUS); TRANSMEMBRANE (PHOBIUS); NON_CYTOPLASMIC_DOMAIN (PHOBIUS); CYTOPLASMIC_DOMAIN (PHOBIUS); TRANSMEMBRANE (PHOBIUS); NON_CYTOPLASMIC_DOMAIN (PHOBIUS); NON_CYTOPLASMIC_DOMAIN (PHOBIUS); CYTOPLASMIC_DOMAIN (PHOBIUS); TRANSMEMBRANE (PHOBIUS); TRANSMEMBRANE (PHOBIUS); TRANSMEMBRANE (PHOBIUS); IPR001839 (PROSITE_PROFILES); IPR029034 (SUPERFAMILY); TMhelix (TMHMM); TMhelix (TMHMM)                                                                                                                                                                                                                     |
| 2154 | 301654_length_2554_cvg_58.0_tip_1_0 | 3376 | heat shock 70 kda protein cognate 3  | 852 | 0         | 93.60% | 0.182   | Coil (COILS); Coil (COILS); IPR013126 (PRINTS); G3DSA:3.30.420.40 (GENE3D); IPR029048 (G3DSA:1.20.1270.GENE3D); G3DSA:3.90.640.10 (GENE3D); IPR013126 (PFAM); G3DSA:3.30.30.30 (GENE3D); IPR029047 (G3DSA:2.60.34.GENE3D); G3DSA:3.30.420.40 (GENE3D); PTHR19375 (PANTHER); PTHR19375:SF157 (PANTHER); IPR018181 (PROSITE_PATTERNS); IPR018181 (PROSITE_PATTERNS); IPR018181 (PROSITE_PATTERNS); CYTOPLASMIC_DOMAIN (PHOBIUS); TRANSMEMBRANE (PHOBIUS); NON_CYTOPLASMIC_DOMAIN (PHOBIUS); IPR029048 (SUPERFAMILY); SSF53067 (SUPERFAMILY); SSF53067 (SUPERFAMILY); IPR029047 (SUPERFAMILY); TMhelix (TMHMM); TMhelix (TMHMM)                                                                                                                                                                                                                                                                                     |
| 2155 | 301662_length_2562_cvg_7.0_tip_1_3  | 288  | tensin isoform x11                   | 854 | 4.83E-143 | 60.90% | 0.117   | IPR029021 (G3DSA:3.90.190.GENE3D); G3DSA:2.60.40.1110 (GENE3D); IPR014020 (PFAM); PTHR12583 (PANTHER); PTHR12583:SF7 (PANTHER); IPR014020 (PROSITE_PROFILES); IPR029023 (PROSITE_PROFILES); IPR029021 (SUPERFAMILY); IPR000008 (SUPERFAMILY)                                                                                                                                                                                                                                                                                                                                                                                                                                                                                                                                                                                                                                                                     |
| 2156 | 301668_length_2567_cvg_58.3_tip_1_2 | 5939 | ubiquitin- isoform a                 | 855 | 0         | 99.00% | 0.418 Y | IPR019956 (PRINTS); IPR000626 (SMART); IPR000626 (PFAM); G3DSA:3.10.20.90 (GENE3D); PTHR10666:SF94 (PANTHER); PTHR10666 (PANTHER); IPR019954 (PROSITE_PATTERNS); NON_CYTOPLASMIC_DOMAIN (PHOBIUS); CYTOPLASMIC_DOMAIN (PHOBIUS); TRANSMEMBRANE (PHOBIUS); IPR000626 (PROSITE_PROFILES); IPR000626 (PROSITE_PROFILES); IPR000626 (PROSITE_PROFILES); IPR000626 (PROSITE_PROFILES); IPR000626 (PROSITE_PROFILES); IPR000626 (PROSITE_PROFILES); IPR029071 (SUPERFAMILY); TMhelix (TMHMM) |
| 2157 | 301682_length_2589_cvg_4.9_tip_1_1  | 211  | sodium calcium exchanger partial     | 863 | 0         | 75.00% | 0.103   | IPR004836 (PRINTS); IPR003644 (SMART); IPR004837 (PFAM); IPR003644 (PFAM); PTHR11878 (PANTHER); TRANSMEMBRANE (PHOBIUS); TRANSMEMBRANE (PHOBIUS); TRANSMEMBRANE (PHOBIUS); NON_CYTOPLASMIC_DOMAIN (PHOBIUS); CYTOPLASMIC_DOMAIN (PHOBIUS); TRANSMEMBRANE (PHOBIUS); TRANSMEMBRANE (PHOBIUS); NON_CYTOPLASMIC_DOMAIN (PHOBIUS); CYTOPLASMIC_DOMAIN (PHOBIUS); NON_CYTOPLASMIC_DOMAIN (PHOBIUS); TRANSMEMBRANE (PHOBIUS); NON_CYTOPLASMIC_DOMAIN (PHOBIUS); CYTOPLASMIC_DOMAIN (PHOBIUS); SSF141072 (SUPERFAMILY); SSF141072 (SUPERFAMILY); TMhelix (TMHMM); TMhelix (TMHMM); TMhelix (TMHMM); TMhelix (TMHMM); TMhelix (TMHMM); TMhelix (TMHMM)                                                                                                                                                                                                                                                                   |







|      |                                     |      |                                                          |     |           |        |         |                                                                                                                                                                                                                                                                                                                                                                                                                                                                                                                                                                                                                                                                                                                                                                                                           |
|------|-------------------------------------|------|----------------------------------------------------------|-----|-----------|--------|---------|-----------------------------------------------------------------------------------------------------------------------------------------------------------------------------------------------------------------------------------------------------------------------------------------------------------------------------------------------------------------------------------------------------------------------------------------------------------------------------------------------------------------------------------------------------------------------------------------------------------------------------------------------------------------------------------------------------------------------------------------------------------------------------------------------------------|
| 2172 | 301842_length_2715_cvg_41.7_tip_1_0 | 2102 | tissue factor pathway inhibitor 2                        | 905 | 4.23E-33  | 62.80% | 0.129   | Coil (COILS); IPR002223 (PRINTS); IPR002223 (SMART); IPR002223 (PFAM); IPR002223 (G3DSA:4.10.410.GENE3D); IPR002223 (G3DSA:4.10.410.GENE3D); PTHR10083 (PANTHER); IPR020901 (PROSITE_PATTERNS); IPR020901 (PROSITE_PATTERNS); TRANSMEMBRANE (PHOBIUS); NON_CYTOPLASMIC_DOMAIN (PHOBIUS); NON_CYTOPLASMIC_DOMAIN (PHOBIUS); CYTOPLASMIC_DOMAIN (PHOBIUS); TRANSMEMBRANE (PHOBIUS); CYTOPLASMIC_DOMAIN (PHOBIUS); TRANSMEMBRANE (PHOBIUS); TRANSMEMBRANE (PHOBIUS); NON_CYTOPLASMIC_DOMAIN (PHOBIUS); CYTOPLASMIC_DOMAIN (PHOBIUS); TRANSMEMBRANE (PHOBIUS); IPR002223 (PROSITE_PROFILES); IPR002223 (PROSITE_PROFILES); IPR002223 (SUPERFAMILY); IPR002223 (SUPERFAMILY); TMhelix (TMHMM); TMhelix (TMHMM); TMhelix (TMHMM); TMhelix (TMHMM)                                                               |
| 2173 | 301846_length_2721_cvg_13.3_tip_1_1 | 498  | beta-galactosidase-like isoform x4                       | 907 | 0         | 59.70% | 0.425 Y | IPR001944 (PRINTS); IPR013781 (G3DSA:3.20.20.GENE3D); IPR008979 (G3DSA:2.60.120.GENE3D); IPR001944 (PFAM); PTHR23421:SF13 (PANTHER); IPR001944 (PANTHER); IPR019801 (PROSITE_PATTERNS); TRANSMEMBRANE (PHOBIUS); CYTOPLASMIC_DOMAIN (PHOBIUS); NON_CYTOPLASMIC_DOMAIN (PHOBIUS); IPR008979 (SUPERFAMILY); IPR017853 (SUPERFAMILY); TMhelix (TMHMM)                                                                                                                                                                                                                                                                                                                                                                                                                                                        |
| 2174 | 301856_length_2732_cvg_6.5_tip_1_4  | 272  | complement c1s subcomponent                              | 911 | 3.70E-11  | 43.75% | 0.106   | IPR000859 (SMART); IPR000859 (G3DSA:2.60.120.GENE3D); IPR000859 (PFAM); CYTOPLASMIC_DOMAIN (PHOBIUS); TRANSMEMBRANE (PHOBIUS); NON_CYTOPLASMIC_DOMAIN (PHOBIUS); IPR000859 (PROSITE_PROFILES); IPR000859 (SUPERFAMILY); IPR000859 (SUPERFAMILY); TMhelix (TMHMM)                                                                                                                                                                                                                                                                                                                                                                                                                                                                                                                                          |
| 2175 | 301868_length_2755_cvg_2.8_tip_1_1  | 171  | urokinase-type plasminogen activator                     | 918 | 2.96E-61  | 48.00% | 0.099   | IPR002172 (PRINTS); IPR002172 (SMART); IPR001254 (SMART); IPR003609 (SMART); G3DSA:2.40.10.10 (GENE3D); IPR003014 (PFAM); G3DSA:2.40.10.10 (GENE3D); IPR001254 (PFAM); IPR002172 (PFAM); G3DSA:3.50.4.10 (GENE3D); IPR002172 (G3DSA:4.10.400.GENE3D); G3DSA:2.40.10.10 (GENE3D); PTHR24256 (PANTHER); IPR023415 (PROSITE_PATTERNS); IPR023415 (PROSITE_PATTERNS); IPR018114 (PROSITE_PATTERNS); IPR018114 (PROSITE_PATTERNS); IPR002172 (PROSITE_PROFILES); IPR003609 (PROSITE_PROFILES); IPR002172 (PROSITE_PROFILES); IPR003609 (PROSITE_PROFILES); IPR002172 (PROSITE_PROFILES); IPR003609 (PROSITE_PROFILES); IPR003609 (PROSITE_PROFILES); IPR002172 (PROSITE_PROFILES); IPR009003 (SUPERFAMILY); IPR002172 (SUPERFAMILY); IPR002172 (SUPERFAMILY); IPR002172 (SUPERFAMILY); IPR002172 (SUPERFAMILY) |
| 2176 | 301894_length_2783_cvg_7.9_tip_1_0  | 315  | angiotensin-converting enzyme-like                       | 928 | 1.04E-162 | 61.70% | 0.276   | Coil (COILS); IPR001548 (PRINTS); IPR001548 (PFAM); IPR001548 (PANTHER); TRANSMEMBRANE (PHOBIUS); CYTOPLASMIC_DOMAIN (PHOBIUS); NON_CYTOPLASMIC_DOMAIN (PHOBIUS); TRANSMEMBRANE (PHOBIUS); CYTOPLASMIC_DOMAIN (PHOBIUS); TRANSMEMBRANE (PHOBIUS); NON_CYTOPLASMIC_DOMAIN (PHOBIUS); CYTOPLASMIC_DOMAIN (PHOBIUS); TRANSMEMBRANE (PHOBIUS); SSF55486 (SUPERFAMILY); TMhelix (TMHMM); TMhelix (TMHMM); TMhelix (TMHMM); TMhelix (TMHMM)                                                                                                                                                                                                                                                                                                                                                                     |
| 2177 | 301900_length_2784_cvg_38.0_tip_1_2 | 1414 | aael014548- partial                                      | 928 | 7.26E-130 | 88.20% | 0.694 Y | IPR012336 (G3DSA:3.40.30.GENE3D); IPR019479 (PFAM); IPR000866 (PFAM); PTHR10681 (PANTHER); PTHR10681:SF101 (PANTHER); TRANSMEMBRANE (PHOBIUS); TRANSMEMBRANE (PHOBIUS); NON_CYTOPLASMIC_DOMAIN (PHOBIUS); SIGNAL_PEPTIDE (PHOBIUS); SIGNAL_PEPTIDE_H_REGION (PHOBIUS); SIGNAL_PEPTIDE_N_REGION (PHOBIUS); NON_CYTOPLASMIC_DOMAIN (PHOBIUS); TRANSMEMBRANE (PHOBIUS); CYTOPLASMIC_DOMAIN (PHOBIUS); CYTOPLASMIC_DOMAIN (PHOBIUS); SIGNAL_PEPTIDE_C_REGION (PHOBIUS); IPR012336 (PROSITE_PROFILES); SignalP-noTM (SIGNALP_GRAM_NEGATIVE); SignalP-noTM (SIGNALP_EUK); SignalP-TM (SIGNALP_GRAM_POSITIVE); IPR012336 (SUPERFAMILY); TMhelix (TMHMM); TMhelix (TMHMM); TMhelix (TMHMM)                                                                                                                        |
| 2178 | 301902_length_2786_cvg_62.8_tip_1_1 | 2687 | agap011476-pa-like protein                               | 929 | 4.71E-74  | 44.80% | 0.115   | TRANSMEMBRANE (PHOBIUS); NON_CYTOPLASMIC_DOMAIN (PHOBIUS); CYTOPLASMIC_DOMAIN (PHOBIUS); TMhelix (TMHMM)                                                                                                                                                                                                                                                                                                                                                                                                                                                                                                                                                                                                                                                                                                  |
| 2179 | 301912_length_2792_cvg_40.1_tip_0_0 | 2385 | map kinase-interacting serine threonine-protein kinase 1 | 931 | 0         | 81.40% | 0.12    | IPR002290 (SMART); G3DSA:3.30.200.20 (GENE3D); G3DSA:1.10.510.10 (GENE3D); IPR000719 (PFAM); PTHR24349 (PANTHER); IPR008271 (PROSITE_PATTERNS); CYTOPLASMIC_DOMAIN (PHOBIUS); TRANSMEMBRANE (PHOBIUS); NON_CYTOPLASMIC_DOMAIN (PHOBIUS); TRANSMEMBRANE (PHOBIUS); NON_CYTOPLASMIC_DOMAIN (PHOBIUS); IPR000719 (PROSITE_PROFILES); IPR011009 (SUPERFAMILY)                                                                                                                                                                                                                                                                                                                                                                                                                                                 |

[illegible]

|      |                                     |      |                                             |     |          |        |         |  |                                                                                                                                                                                                                                                                                                                                                                                                                                                                                                                                                                                                                                                                                                                                                                                                                                                                                                                                 |
|------|-------------------------------------|------|---------------------------------------------|-----|----------|--------|---------|--|---------------------------------------------------------------------------------------------------------------------------------------------------------------------------------------------------------------------------------------------------------------------------------------------------------------------------------------------------------------------------------------------------------------------------------------------------------------------------------------------------------------------------------------------------------------------------------------------------------------------------------------------------------------------------------------------------------------------------------------------------------------------------------------------------------------------------------------------------------------------------------------------------------------------------------|
|      |                                     |      |                                             |     |          |        |         |  | IPR015880 (SMART); IPR013087 (G3DSA:3.30.160.GENE3D); IPR013087 (G3DSA:3.30.160.GENE3D); PF13894 (PFAM); IPR013087 (G3DSA:3.30.160.GENE3D); IPR013087 (G3DSA:3.30.160.GENE3D); PTHR24409 (PANTHER); IPR007087 (PROSITE_PATTERNS); IPR007087 (PROSITE_PROFILES); SSF57667 (SUPERFAMILY); SSF57667 (SUPERFAMILY); SSF57667 (SUPERFAMILY); SSF57667 (SUPERFAMILY)                                                                  |
| 2184 | 301934_length_2815_cvg_10.6_tip_1_5 | 387  | zinc finger protein 239- partial            | 938 | 4.42E-72 | 55.60% | 0.135   |  | Coil (COILS); IPR001747 (SMART); IPR015816 (G3DSA:2.30.230.GENE3D); IPR001747 (PFAM); IPR015255 (PFAM); IPR015817 (G3DSA:2.20.50.GENE3D); IPR011030 (G3DSA:1.25.10.GENE3D); IPR015818 (G3DSA:2.20.80.GENE3D); PTHR23345:SF11 (PANTHER); PTHR23345 (PANTHER); SIGNAL_PEPTIDE_H_REGION (PHOBIUS); SIGNAL_PEPTIDE (PHOBIUS); SIGNAL_PEPTIDE_N_REGION (PHOBIUS); SIGNAL_PEPTIDE_C_REGION (PHOBIUS); NON_CYTOPLASMIC_DOMAIN (PHOBIUS); IPR001747 (PROSITE_PROFILES); SignalP-noTM (SIGNALP_EUK); IPR011030 (SUPERFAMILY); IPR015819 (SUPERFAMILY); IPR015819 (SUPERFAMILY); TMhelix (TMHMM)                                                                                                                                                                                                                                                                                                                                          |
| 2185 | 301938_length_2818_cvg_5.5_tip_1_3  | 246  | dip hdl-bgpb precursor                      | 940 | 0        | 63.60% | 0.727 Y |  | IPR003598 (SMART); IPR003599 (SMART); IPR013098 (PFAM); IPR013783 (G3DSA:2.60.40.GENE3D); IPR013783 (G3DSA:2.60.40.GENE3D); IPR013783 (G3DSA:2.60.40.GENE3D); IPR013783 (G3DSA:2.60.40.GENE3D); PTHR19897 (PANTHER); PTHR19897:SF149 (PANTHER); CYTOPLASMIC_DOMAIN (PHOBIUS); CYTOPLASMIC_DOMAIN (PHOBIUS); TRANSMEMBRANE (PHOBIUS); NON_CYTOPLASMIC_DOMAIN (PHOBIUS); NON_CYTOPLASMIC_DOMAIN (PHOBIUS); TRANSMEMBRANE (PHOBIUS); NON_CYTOPLASMIC_DOMAIN (PHOBIUS); CYTOPLASMIC_DOMAIN (PHOBIUS); TRANSMEMBRANE (PHOBIUS); TRANSMEMBRANE (PHOBIUS); TRANSMEMBRANE (PHOBIUS); IPR007110 (PROSITE_PROFILES); IPR007110 (PROSITE_PROFILES); IPR007110 (PROSITE_PROFILES); SSF48726 (SUPERFAMILY); SSF48726 (SUPERFAMILY); SSF48726 (SUPERFAMILY); SSF48726 (SUPERFAMILY); TMhelix (TMHMM); TMhelix (TMHMM)                                                                                                                         |
| 2186 | 301942_length_2826_cvg_41.9_tip_1_1 | 3483 | titin isoform x5                            | 942 | 0        | 75.50% | 0.099   |  | IPR001548 (PRINTS); IPR001548 (PFAM); IPR001548 (PANTHER); SSF55486 (SUPERFAMILY); SSF55486 (SUPERFAMILY)                                                                                                                                                                                                                                                                                                                                                                                                                                                                                                                                                                                                                                                                                                                                                                                                                       |
| 2187 | 301948_length_2836_cvg_7.9_tip_1_1  | 326  | angiotensin-converting enzyme               | 945 | 0        | 63.40% | 0.155   |  | IPR014001 (SMART); IPR001650 (SMART); IPR003877 (SMART); IPR011545 (PFAM); IPR001650 (PFAM); IPR003877 (PFAM); IPR027417 (G3DSA:3.40.50.GENE3D); IPR027417 (G3DSA:3.40.50.GENE3D); PTHR24031:SF211 (PANTHER); PTHR24031 (PANTHER); IPR014014 (PROSITE_PROFILES); IPR001870 (PROSITE_PROFILES); IPR014001 (PROSITE_PROFILES); IPR001650 (PROSITE_PROFILES); IPR027417 (SUPERFAMILY); IPR027417 (SUPERFAMILY); IPR013320 (SUPERFAMILY) G3DSA:3.40.630.10 (GENE3D); IPR007484 (PFAM); PTHR12053 (PANTHER); NON_CYTOPLASMIC_DOMAIN (PHOBIUS); NON_CYTOPLASMIC_DOMAIN (PHOBIUS); TRANSMEMBRANE (PHOBIUS); TRANSMEMBRANE (PHOBIUS); NON_CYTOPLASMIC_DOMAIN (PHOBIUS); TRANSMEMBRANE (PHOBIUS); CYTOPLASMIC_DOMAIN (PHOBIUS); TRANSMEMBRANE (PHOBIUS); CYTOPLASMIC_DOMAIN (PHOBIUS); CYTOPLASMIC_DOMAIN (PHOBIUS); TRANSMEMBRANE (PHOBIUS); SSF53187 (SUPERFAMILY); TMhelix (TMHMM); TMhelix (TMHMM); TMhelix (TMHMM); TMhelix (TMHMM) |
| 2188 | 301956_length_2849_cvg_9.3_tip_1_4  | 364  | atp-dependent rna helicase ddx1             | 950 | 0        | 83.50% | 0.332   |  | IPR003599 (SMART); IPR003598 (SMART); IPR013783 (G3DSA:2.60.40.GENE3D); IPR013098 (PFAM); IPR020675 (PANTHER); TRANSMEMBRANE (PHOBIUS); NON_CYTOPLASMIC_DOMAIN (PHOBIUS); CYTOPLASMIC_DOMAIN (PHOBIUS); NON_CYTOPLASMIC_DOMAIN (PHOBIUS); TRANSMEMBRANE (PHOBIUS); IPR007110 (PROSITE_PROFILES); SSF48726 (SUPERFAMILY)                                                                                                                                                                                                                                                                                                                                                                                                                                                                                                                                                                                                         |
| 2189 | 301968_length_2860_cvg_30.4_tip_1_1 | 1296 | carboxypeptidase q-like                     | 953 | 0        | 75.80% | 0.193   |  |                                                                                                                                                                                                                                                                                                                                                                                                                                                                                                                                                                                                                                                                                                                                                                                                                                                                                                                                 |
| 2190 | 301980_length_2882_cvg_33.8_tip_1_2 | 1149 | muscle m-line assembly protein unc- partial | 960 | 1.70E-45 | 49.40% | 0.105   |  |                                                                                                                                                                                                                                                                                                                                                                                                                                                                                                                                                                                                                                                                                                                                                                                                                                                                                                                                 |

|      |                                     |       |                                              |     |           |        |         |                                                                                                                                                                                                                                                                                                                                                                                                                                                                                                                                                                                                                                                                                                                                                                                                                                                                                                                                                                                                                                            |
|------|-------------------------------------|-------|----------------------------------------------|-----|-----------|--------|---------|--------------------------------------------------------------------------------------------------------------------------------------------------------------------------------------------------------------------------------------------------------------------------------------------------------------------------------------------------------------------------------------------------------------------------------------------------------------------------------------------------------------------------------------------------------------------------------------------------------------------------------------------------------------------------------------------------------------------------------------------------------------------------------------------------------------------------------------------------------------------------------------------------------------------------------------------------------------------------------------------------------------------------------------------|
| 2191 | 301998_length_2905_cvg_74.2_tip_1_0 | 10688 | cathepsin d                                  | 969 | 0         | 80.50% | 0.186   | IPR001461 (PRINTS); IPR021109 (G3DSA:2.40.70.GENE3D); IPR021109 (G3DSA:2.40.70.GENE3D); IPR001461 (PFAM); IPR012848 (PFAM); PTHR13683:SF230 (PANTHER); IPR001461 (PANTHER); IPR001969 (PROSITE_PATTERNS); IPR001969 (PROSITE_PATTERNS); NON_CYTOPLASMIC_DOMAIN (PHOBIUS); TRANSMEMBRANE (PHOBIUS); CYTOPLASMIC_DOMAIN (PHOBIUS); TRANSMEMBRANE (PHOBIUS); NON_CYTOPLASMIC_DOMAIN (PHOBIUS); CYTOPLASMIC_DOMAIN (PHOBIUS); TRANSMEMBRANE (PHOBIUS); IPR021109 (SUPERFAMILY); TMhelix (TMHMM); TMhelix (TMHMM); TMhelix (TMHMM)                                                                                                                                                                                                                                                                                                                                                                                                                                                                                                              |
| 2192 | 302000_length_2906_cvg_49.4_tip_1_3 | 2066  | low quality protein: mucin-19                | 969 | 1.35E-25  | 41.70% | 0.162   | TMhelix (TMHMM); TMhelix (TMHMM); TMhelix (TMHMM); TMhelix (TMHMM)                                                                                                                                                                                                                                                                                                                                                                                                                                                                                                                                                                                                                                                                                                                                                                                                                                                                                                                                                                         |
| 2193 | 302028_length_2934_cvg_21.5_tip_1_4 | 1071  | villin-1-like isoform x1                     | 978 | 0         | 66.30% | 0.114   | IPR007122 (PRINTS); IPR003128 (SMART); IPR007122 (SMART); IPR029006 (G3DSA:3.40.20.GENE3D); IPR003128 (G3DSA:1.10.950.GENE3D); IPR003128 (PFAM); IPR029006 (G3DSA:3.40.20.GENE3D); IPR029006 (G3DSA:3.40.20.GENE3D); IPR007123 (PFAM); IPR007122 (PANTHER); CYTOPLASMIC_DOMAIN (PHOBIUS); NON_CYTOPLASMIC_DOMAIN (PHOBIUS); TRANSMEMBRANE (PHOBIUS); IPR003128 (PROSITE_PROFILES); SSF55753 (SUPERFAMILY); SSF55753 (SUPERFAMILY); SSF55753 (SUPERFAMILY); IPR003128 (SUPERFAMILY); SSF55753 (SUPERFAMILY); SSF55753 (SUPERFAMILY); SSF55753 (SUPERFAMILY)                                                                                                                                                                                                                                                                                                                                                                                                                                                                                 |
| 2194 | 302044_length_2946_cvg_27.1_tip_1_1 | 838   | n-acetylated-alpha-linked acidic dipeptidase | 982 | 0         | 60.00% | 0.238   | IPR003137 (PFAM); IPR007484 (PFAM); G3DSA:3.50.30.30 (GENE3D); IPR007365 (G3DSA:1.20.930.GENE3D); IPR007365 (PFAM); G3DSA:3.40.630.10 (GENE3D); PTHR10404 (PANTHER); CYTOPLASMIC_DOMAIN (PHOBIUS); CYTOPLASMIC_DOMAIN (PHOBIUS); TRANSMEMBRANE (PHOBIUS); NON_CYTOPLASMIC_DOMAIN (PHOBIUS); TRANSMEMBRANE (PHOBIUS); SSF53187 (SUPERFAMILY); SSF52025 (SUPERFAMILY); IPR007365 (SUPERFAMILY); TMhelix (TMHMM); TMhelix (TMHMM); TMhelix (TMHMM)                                                                                                                                                                                                                                                                                                                                                                                                                                                                                                                                                                                            |
| 2195 | 302052_length_2954_cvg_8.0_tip_1_5  | 299   | ferric-chelate reductase 1 homolog           | 984 | 2.10E-161 | 57.80% | 0.751 Y | IPR006593 (SMART); IPR005018 (SMART); IPR005018 (PFAM); IPR004877 (PFAM); IPR002861 (PFAM); PTHR23130:SF70 (PANTHER); PTHR23130 (PANTHER); NON_CYTOPLASMIC_DOMAIN (PHOBIUS); TRANSMEMBRANE (PHOBIUS); SIGNAL_PEPTIDE_H_REGION (PHOBIUS); SIGNAL_PEPTIDE (PHOBIUS); SIGNAL_PEPTIDE_N_REGION (PHOBIUS); CYTOPLASMIC_DOMAIN (PHOBIUS); NON_CYTOPLASMIC_DOMAIN (PHOBIUS); NON_CYTOPLASMIC_DOMAIN (PHOBIUS); TRANSMEMBRANE (PHOBIUS); CYTOPLASMIC_DOMAIN (PHOBIUS); TRANSMEMBRANE (PHOBIUS); CYTOPLASMIC_DOMAIN (PHOBIUS); CYTOPLASMIC_DOMAIN (PHOBIUS); TRANSMEMBRANE (PHOBIUS); NON_CYTOPLASMIC_DOMAIN (PHOBIUS); TRANSMEMBRANE (PHOBIUS); SIGNAL_PEPTIDE_C_REGION (PHOBIUS); TRANSMEMBRANE (PHOBIUS); NON_CYTOPLASMIC_DOMAIN (PHOBIUS); TRANSMEMBRANE (PHOBIUS); IPR002861 (PROSITE_PROFILES); IPR005018 (PROSITE_PROFILES); IPR006593 (PROSITE_PROFILES); SignalP-TM (SIGNALP_EUK); TMhelix (TMHMM); TMhelix (TMHMM) |
| 2196 | 302058_length_2961_cvg_25.6_tip_1_4 | 1175  | beta-lactamase-like protein 2-like           | 987 | 1.86E-55  | 50.40% | 0.381 Y | IPR012338 (G3DSA:3.40.710.GENE3D); IPR001466 (PFAM); PTHR22935 (PANTHER); PTHR22935:SF64 (PANTHER); NON_CYTOPLASMIC_DOMAIN (PHOBIUS); TRANSMEMBRANE (PHOBIUS); CYTOPLASMIC_DOMAIN (PHOBIUS); IPR012338 (SUPERFAMILY)                                                                                                                                                                                                                                                                                                                                                                                                                                                                                                                                                                                                                                                                                                                                                                                                                       |
| 2197 | 302068_length_2971_cvg_43.0_tip_1_4 | 2060  | hypothetical protein DAPPUDRAFT_200882       | 990 | 0         | 60.50% | 0.116   | IPR018497 (PRINTS); IPR008753 (PFAM); IPR018497 (PFAM); IPR024079 (G3DSA:3.40.390.GENE3D); PTHR11733:SF111 (PANTHER); IPR000718 (PANTHER); NON_CYTOPLASMIC_DOMAIN (PHOBIUS); CYTOPLASMIC_DOMAIN (PHOBIUS); TRANSMEMBRANE (PHOBIUS); SSF55486 (SUPERFAMILY); TMhelix (TMHMM)                                                                                                                                                                                                                                                                                                                                                                                                                                                                                                                                                                                                                                                                                                                                                                |
| 2201 | 302086_length_3001_cvg_39.8_tip_1_1 | 2273  | peroxidasin homolog                          | 991 | 8.66E-119 | 54.50% | 0.418 Y | Coil (COILS); IPR019791 (PRINTS); IPR019791 (G3DSA:1.10.640.GENE3D); IPR019791 (PFAM); PTHR11475 (PANTHER); CYTOPLASMIC_DOMAIN (PHOBIUS); TRANSMEMBRANE (PHOBIUS); NON_CYTOPLASMIC_DOMAIN (PHOBIUS); CYTOPLASMIC_DOMAIN (PHOBIUS); NON_CYTOPLASMIC_DOMAIN (PHOBIUS); TRANSMEMBRANE (PHOBIUS); TRANSMEMBRANE (PHOBIUS); IPR019791 (PROSITE_PROFILES); IPR010255 (SUPERFAMILY)                                                                                                                                                                                                                                                                                                                                                                                                                                                                                                                                                                                                                                                               |



|      |                                     |      |                                                                      |      |          |        |         |                                                                                                                                                                                                                                                                                                                                                                                                                                                                                                                                                                                                                                                                                                                                                                                                                                                                                                                                                                                                                                                                                                                                                                                                                  |
|------|-------------------------------------|------|----------------------------------------------------------------------|------|----------|--------|---------|------------------------------------------------------------------------------------------------------------------------------------------------------------------------------------------------------------------------------------------------------------------------------------------------------------------------------------------------------------------------------------------------------------------------------------------------------------------------------------------------------------------------------------------------------------------------------------------------------------------------------------------------------------------------------------------------------------------------------------------------------------------------------------------------------------------------------------------------------------------------------------------------------------------------------------------------------------------------------------------------------------------------------------------------------------------------------------------------------------------------------------------------------------------------------------------------------------------|
| 2198 | 302074_length_2976_cvg_37.4_tip_1_5 | 1404 | proactivator polypeptide-like                                        | 992  | 0        | 54.80% | 0.307   | IPR008373 (PRINTS); IPR008139 (SMART); IPR003119 (SMART); IPR011001 (G3DSA:1.10.225.GENE3D); IPR011001 (G3DSA:1.10.225.GENE3D); IPR003119 (PFAM); IPR007856 (PFAM); IPR008138 (PFAM); IPR011001 (G3DSA:1.10.225.GENE3D); IPR011001 (G3DSA:1.10.225.GENE3D); PTHR11480:SF3 (PANTHER); PTHR11480 (PANTHER); TRANSMEMBRANE (PHOBIUS); CYTOPLASMIC_DOMAIN (PHOBIUS); TRANSMEMBRANE (PHOBIUS); NON_CYTOPLASMIC_DOMAIN (PHOBIUS); CYTOPLASMIC_DOMAIN (PHOBIUS); IPR003119 (PROSITE_PROFILES); IPR008139 (PROSITE_PROFILES); IPR008139 (PROSITE_PROFILES); IPR008139 (PROSITE_PROFILES); IPR008139 (PROSITE_PROFILES); IPR003119 (PROSITE_PROFILES); IPR008139 (PROSITE_PROFILES); IPR011001 (SUPERFAMILY); IPR011001 (SUPERFAMILY); IPR011001 (SUPERFAMILY); IPR011001 (SUPERFAMILY); IPR011001 (SUPERFAMILY); TMhelix (TMHMM)                                                                                                                                                                                                                                                                                                                                                                                         |
| 2199 | 302076_length_2977_cvg_20.8_tip_1_5 | 673  | sucrase- intestinal-like                                             | 992  | 0        | 61.70% | 0.586 Y | IPR000322 (PFAM); PTHR22762 (PANTHER); PTHR22762:SF7 (PANTHER); IPR030458 (PROSITE_PATTERNS); IPR030459 (PROSITE_PATTERNS); SIGNAL_PEPTIDE_H_REGION (PHOBIUS); SIGNAL_PEPTIDE_C_REGION (PHOBIUS); NON_CYTOPLASMIC_DOMAIN (PHOBIUS); SIGNAL_PEPTIDE (PHOBIUS); SIGNAL_PEPTIDE_N_REGION (PHOBIUS); SignalP-noTM (SIGNALP_EUK); SSF51011 (SUPERFAMILY); IPR011013 (SUPERFAMILY); IPR017853 (SUPERFAMILY)                                                                                                                                                                                                                                                                                                                                                                                                                                                                                                                                                                                                                                                                                                                                                                                                            |
| 2200 | 302078_length_2981_cvg_44.7_tip_1_2 | 2064 | pdz and lim domain protein zasp-like                                 | 993  | 6.42E-35 | 53.40% | 0.103   | IPR001478 (SMART); IPR001478 (G3DSA:2.30.42.GENE3D); IPR001478 (PFAM); PTHR24214:SF29 (PANTHER); PTHR24214 (PANTHER); TRANSMEMBRANE (PHOBIUS); CYTOPLASMIC_DOMAIN (PHOBIUS); NON_CYTOPLASMIC_DOMAIN (PHOBIUS); IPR001478 (PROSITE_PROFILES); IPR001478 (SUPERFAMILY)                                                                                                                                                                                                                                                                                                                                                                                                                                                                                                                                                                                                                                                                                                                                                                                                                                                                                                                                             |
| 2202 | 302092_length_3004_cvg_46.0_tip_1_4 | 1637 | meprin a                                                             | 1001 | 8.82E-72 | 50.10% | 0.789 Y | IPR001506 (PRINTS); IPR006026 (SMART); IPR000859 (SMART); IPR001506 (PFAM); IPR000859 (PFAM); IPR000859 (G3DSA:2.60.120.GENE3D); IPR000859 (G3DSA:2.60.120.GENE3D); IPR024079 (G3DSA:3.40.390.GENE3D); PTHR10127 (PANTHER); PTHR10127:SF580 (PANTHER); TRANSMEMBRANE (PHOBIUS); NON_CYTOPLASMIC_DOMAIN (PHOBIUS); SIGNAL_PEPTIDE_H_REGION (PHOBIUS); SIGNAL_PEPTIDE_N_REGION (PHOBIUS); CYTOPLASMIC_DOMAIN (PHOBIUS); SIGNAL_PEPTIDE (PHOBIUS); TRANSMEMBRANE (PHOBIUS); SIGNAL_PEPTIDE_C_REGION (PHOBIUS); NON_CYTOPLASMIC_DOMAIN (PHOBIUS); IPR000859 (PROSITE_PROFILES); SignalP-noTM (SIGNALP_EUK); SSF55486 (SUPERFAMILY); IPR000859 (SUPERFAMILY)                                                                                                                                                                                                                                                                                                                                                                                                                                                                                                                                                          |
| 2203 | 302114_length_3022_cvg_42.0_tip_1_5 | 1756 | glucose dehydrogenase                                                | 1007 | 0        | 68.40% | 0.141   | G3DSA:3.50.50.60 (GENE3D); IPR007867 (PFAM); IPR000172 (PFAM); PTHR11552 (PANTHER); PTHR11552:SF77 (PANTHER); IPR000172 (PROSITE_PATTERNS); CYTOPLASMIC_DOMAIN (PHOBIUS); TRANSMEMBRANE (PHOBIUS); CYTOPLASMIC_DOMAIN (PHOBIUS); NON_CYTOPLASMIC_DOMAIN (PHOBIUS); TRANSMEMBRANE (PHOBIUS); SSF54373 (SUPERFAMILY); SSF51905 (SUPERFAMILY); TMhelix (TMHMM)                                                                                                                                                                                                                                                                                                                                                                                                                                                                                                                                                                                                                                                                                                                                                                                                                                                      |
| 2204 | 302118_length_3030_cvg_15.1_tip_1_1 | 515  | basement membrane-specific heparan sulfate proteoglycan core protein | 1010 | 0        | 70.20% | 0.109   | IPR001791 (SMART); IPR001881 (SMART); IPR000742 (SMART); IPR003599 (SMART); IPR003598 (SMART); PF13895 (PFAM); IPR000742 (PFAM); IPR001791 (PFAM); IPR013320 (G3DSA:2.60.120.GENE3D); IPR013320 (G3DSA:2.60.120.GENE3D); IPR013320 (G3DSA:2.60.120.GENE3D); G3DSA:2.10.25.10 (GENE3D); IPR001791 (PFAM); G3DSA:2.10.25.10 (GENE3D); G3DSA:2.10.25.10 (GENE3D); IPR013783 (G3DSA:2.60.40.GENE3D); PTHR10574:SF247 (PANTHER); PTHR10574 (PANTHER); IPR013032 (PROSITE_PATTERNS); IPR013032 (PROSITE_PATTERNS); IPR000152 (PROSITE_PATTERNS); IPR013032 (PROSITE_PATTERNS); IPR013032 (PROSITE_PATTERNS); IPR013032 (PROSITE_PATTERNS); IPR013032 (PROSITE_PATTERNS); NON_CYTOPLASMIC_DOMAIN (PHOBIUS); TRANSMEMBRANE (PHOBIUS); CYTOPLASMIC_DOMAIN (PHOBIUS); IPR001791 (PROSITE_PROFILES); IPR000742 (PROSITE_PROFILES); IPR001791 (PROSITE_PROFILES); IPR000742 (PROSITE_PROFILES); IPR001791 (PROSITE_PROFILES); IPR000742 (PROSITE_PROFILES); IPR000742 (PROSITE_PROFILES); IPR007110 (PROSITE_PROFILES); SSF57196 (SUPERFAMILY); SSF48726 (SUPERFAMILY); IPR013320 (SUPERFAMILY); IPR013320 (SUPERFAMILY); IPR013320 (SUPERFAMILY); SSF57196 (SUPERFAMILY); TMhelix (TMHMM); TMhelix (TMHMM); TMhelix (TMHMM) |



|      |                                     |       |                                                                                                             |      |           |        |       |                                                                                                                                                                                                                                                                                                                                                                                                                                                                                                                                                                                                                                                                                                                                                                                                                                    |
|------|-------------------------------------|-------|-------------------------------------------------------------------------------------------------------------|------|-----------|--------|-------|------------------------------------------------------------------------------------------------------------------------------------------------------------------------------------------------------------------------------------------------------------------------------------------------------------------------------------------------------------------------------------------------------------------------------------------------------------------------------------------------------------------------------------------------------------------------------------------------------------------------------------------------------------------------------------------------------------------------------------------------------------------------------------------------------------------------------------|
| 2214 | 302186_length_3125_cvg_64.6_tip_0_3 | 36669 | e3 ubiquitin-protein ligase partial                                                                         | 1042 | 0         | 53.20% | 0.104 | IPR001841 (SMART); IPR001478 (SMART); IPR013083 (G3DSA:3.30.40.GENE3D); PF02176 (PFAM); IPR001478 (PFAM); IPR001478 (G3DSA:2.30.42.GENE3D); PF13920 (PFAM); IPR013323 (G3DSA:3.90.890.GENE3D); IPR001478 (G3DSA:2.30.42.GENE3D); PTHR19964 (PANTHER); IPR017907 (PROSITE_PATTERNS); NON_CYTOPLASMIC_DOMAIN (PHOBIUS); TRANSMEMBRANE (PHOBIUS); TRANSMEMBRANE (PHOBIUS); NON_CYTOPLASMIC_DOMAIN (PHOBIUS); CYTOPLASMIC_DOMAIN (PHOBIUS); IPR001478 (PROSITE_PROFILES); IPR001478 (PROSITE_PROFILES); IPR001293 (PROSITE_PROFILES); IPR001841 (PROSITE_PROFILES); IPR001478 (PROSITE_PROFILES); IPR001478 (PROSITE_PROFILES); IPR001478 (SUPERFAMILY); IPR001478 (SUPERFAMILY); IPR008974 (SUPERFAMILY); SSF57850 (SUPERFAMILY); IPR001478 (SUPERFAMILY); IPR001478 (SUPERFAMILY); TMhelix (TMHMM); TMhelix (TMHMM); TMhelix (TMHMM) |
| 2215 | 302196_length_3136_cvg_25.8_tip_1_0 | 942   | a disintegrin and metalloproteinase with thrombospondin motifs 1 isoform x1                                 | 1046 | 4.28E-134 | 70.50% | 0.107 | IPR024079 (G3DSA:3.40.390.GENE3D); PF13583 (PFAM); PTHR13723 (PANTHER); PTHR13723:SF148 (PANTHER); NON_CYTOPLASMIC_DOMAIN (PHOBIUS); TRANSMEMBRANE (PHOBIUS); TRANSMEMBRANE (PHOBIUS); NON_CYTOPLASMIC_DOMAIN (PHOBIUS); CYTOPLASMIC_DOMAIN (PHOBIUS); IPR001590 (PROSITE_PROFILES); SSF55486 (SUPERFAMILY); TMhelix (TMHMM); TMhelix (TMHMM)                                                                                                                                                                                                                                                                                                                                                                                                                                                                                      |
| 2220 | 302242_length_3182_cvg_22.2_tip_1_2 | 1103  | transitional endoplasmic reticulum atpase ter94                                                             | 1046 | 0         | 94.80% | 0.127 | IPR003593 (SMART); IPR004201 (SMART); IPR003338 (SMART); IPR005938 (TIGRFAM); IPR027417 (G3DSA:3.40.50.GENE3D); IPR029067 (G3DSA:3.10.330.GENE3D); IPR015415 (PFAM); G3DSA:1.10.8.60 (GENE3D); G3DSA:2.40.40.20 (GENE3D); IPR004201 (PFAM); IPR003338 (PFAM); IPR003959 (PFAM); IPR027417 (G3DSA:3.40.50.GENE3D); PTHR23077 (PANTHER); PTHR23077:SF69 (PANTHER); IPR003960 (PROSITE_PATTERNS); IPR003960 (PROSITE_PATTERNS); IPR029067 (SUPERFAMILY); IPR027417 (SUPERFAMILY); IPR027417 (SUPERFAMILY); IPR009010 (SUPERFAMILY)                                                                                                                                                                                                                                                                                                    |
| 2216 | 302204_length_3144_cvg_14.6_tip_1_4 | 575   | a chain structural studies of protein tyrosine phosphatase beta catalytic domain in complex with inhibitors | 1048 | 1.21E-75  | 57.90% | 0.102 | IPR000242 (PRINTS); IPR003595 (SMART); IPR000242 (SMART); IPR003961 (SMART); IPR029021 (G3DSA:3.90.190.GENE3D); IPR013783 (G3DSA:2.60.40.GENE3D); IPR013783 (G3DSA:2.60.40.GENE3D); IPR003961 (PFAM); IPR013783 (G3DSA:2.60.40.GENE3D); IPR000242 (PFAM); IPR013783 (G3DSA:2.60.40.GENE3D); PTHR19134 (PANTHER); IPR016130 (PROSITE_PATTERNS); TRANSMEMBRANE (PHOBIUS); NON_CYTOPLASMIC_DOMAIN (PHOBIUS); CYTOPLASMIC_DOMAIN (PHOBIUS); IPR003961 (PROSITE_PROFILES); IPR003961 (PROSITE_PROFILES); IPR003961 (PROSITE_PROFILES); IPR003961 (PROSITE_PROFILES); IPR000387 (PROSITE_PROFILES); IPR000242 (PROSITE_PROFILES); IPR003961 (SUPERFAMILY); IPR029021 (SUPERFAMILY); IPR003961 (SUPERFAMILY); IPR003961 (SUPERFAMILY)                                                                                                     |
| 2217 | 302216_length_3162_cvg_8.6_tip_1_1  | 352   | serine threonine-protein kinase pim-3                                                                       | 1054 | 2.50E-128 | 76.90% | 0.107 | IPR002290 (SMART); IPR000719 (PFAM); G3DSA:1.10.510.10 (GENE3D); G3DSA:3.30.200.20 (GENE3D); PTHR22984:SF1 (PANTHER); PTHR22984 (PANTHER); IPR008271 (PROSITE_PATTERNS); IPR017441 (PROSITE_PATTERNS); CYTOPLASMIC_DOMAIN (PHOBIUS); CYTOPLASMIC_DOMAIN (PHOBIUS); TRANSMEMBRANE (PHOBIUS); NON_CYTOPLASMIC_DOMAIN (PHOBIUS); TRANSMEMBRANE (PHOBIUS); CYTOPLASMIC_DOMAIN (PHOBIUS); NON_CYTOPLASMIC_DOMAIN (PHOBIUS); TRANSMEMBRANE (PHOBIUS); NON_CYTOPLASMIC_DOMAIN (PHOBIUS); TRANSMEMBRANE (PHOBIUS); IPR000719 (PROSITE_PROFILES); IPR011009 (SUPERFAMILY); TMhelix (TMHMM); TMhelix (TMHMM)                                                                                                          |
| 2218 | 302228_length_3169_cvg_55.9_tip_1_5 | 3632  | cell surface protein                                                                                        | 1056 | 1.08E-12  | 44.30% | 0.179 | TRANSMEMBRANE (PHOBIUS); TRANSMEMBRANE (PHOBIUS); NON_CYTOPLASMIC_DOMAIN (PHOBIUS); CYTOPLASMIC_DOMAIN (PHOBIUS); TRANSMEMBRANE (PHOBIUS); NON_CYTOPLASMIC_DOMAIN (PHOBIUS); CYTOPLASMIC_DOMAIN (PHOBIUS); TRANSMEMBRANE (PHOBIUS); CYTOPLASMIC_DOMAIN (PHOBIUS)                                                                                                                                                                                                                                                                                                                                                                                                                                                                                                                                                                   |
| 2219 | 302234_length_3171_cvg_6.1_tip_1_4  | 261   | usher syndrome type-1g protein homolog                                                                      | 1057 | 5.35E-132 | 62.20% | 0.11  | Coil (COILS); IPR002110 (SMART); IPR001660 (SMART); IPR020683 (G3DSA:1.25.40.GENE3D); IPR013761 (G3DSA:1.10.150.GENE3D); IPR021129 (PFAM); IPR020683 (PFAM); PTHR24161:SF6 (PANTHER); PTHR24161 (PANTHER); IPR002110 (PROSITE_PROFILES); IPR002110 (PROSITE_PROFILES); IPR020683 (PROSITE_PROFILES); IPR013761 (SUPERFAMILY); IPR020683 (SUPERFAMILY)                                                                                                                                                                                                                                                                                                                                                                                                                                                                              |







|      |                                     |      |                                                              |      |           |        |       |                                                                                                                                                                                                                                                                                                                                                                                                                                                                                                                                                                                                                                                                                            |
|------|-------------------------------------|------|--------------------------------------------------------------|------|-----------|--------|-------|--------------------------------------------------------------------------------------------------------------------------------------------------------------------------------------------------------------------------------------------------------------------------------------------------------------------------------------------------------------------------------------------------------------------------------------------------------------------------------------------------------------------------------------------------------------------------------------------------------------------------------------------------------------------------------------------|
| 2234 | 302340_length_3374_cvg_18.8_tip_1_4 | 1079 | staphylococcal nuclease domain-containing protein 1-like     | 1125 | 0         | 74.40% | 0.147 | Coil (COILS); IPR002999 (SMART); IPR016071 (SMART); IPR016071 (PFAM); IPR016071 (G3DSA:2.40.50.GENE3D); G3DSA:2.30.30.140 (GENE3D); IPR002999 (PFAM); IPR016071 (G3DSA:2.40.50.GENE3D); IPR030481 (PTHR12302:PANTHER); PTHR12302 (PANTHER); NON_CYTOPLASMIC_DOMAIN (PHOBIUS); TRANSMEMBRANE (PHOBIUS); CYTOPLASMIC_DOMAIN (PHOBIUS); IPR002999 (PROSITE_PROFILES); IPR016071 (PROSITE_PROFILES); IPR016071 (PROSITE_PROFILES); IPR016071 (PROSITE_PROFILES); IPR016071 (SUPERFAMILY); SSF63748 (SUPERFAMILY); IPR016071 (SUPERFAMILY); IPR016071 (SUPERFAMILY); IPR016071 (SUPERFAMILY); IPR016071 (TMHMM); TMhelix (TMHMM)                                                                |
| 2235 | 302352_length_3406_cvg_12.2_tip_1_2 | 505  | uncharacterized family 31 glucosidase k1a1161 isoform x5     | 1135 | 0         | 62.40% | 0.137 | IPR013785 (G3DSA:3.20.20.GENE3D); IPR000322 (PFAM); PTHR22762:SF73 (PANTHER); PTHR22762 (PANTHER); CYTOPLASMIC_DOMAIN (PHOBIUS); TRANSMEMBRANE (PHOBIUS); NON_CYTOPLASMIC_DOMAIN (PHOBIUS); SSF51011 (SUPERFAMILY); IPR017853 (SUPERFAMILY); TMhelix (TMHMM)                                                                                                                                                                                                                                                                                                                                                                                                                               |
| 2236 | 302360_length_3422_cvg_14.6_tip_1_3 | 575  | integrin alpha-8-like                                        | 1141 | 1.71E-153 | 48.70% | 0.105 | IPR000413 (PRINTS); IPR013519 (SMART); G3DSA:2.60.40.1530 (GENE3D); G3DSA:2.130.10.130 (GENE3D); IPR013649 (PFAM); PF13517 (PFAM); G3DSA:2.60.40.1510 (GENE3D); G3DSA:1.20.5.930 (GENE3D); G3DSA:2.60.40.1460 (GENE3D); PTHR23220 (PANTHER); PTHR23220:SF71 (PANTHER); TRANSMEMBRANE (PHOBIUS); NON_CYTOPLASMIC_DOMAIN (PHOBIUS); CYTOPLASMIC_DOMAIN (PHOBIUS); IPR013519 (PROSITE_PROFILES); IPR013519 (PROSITE_PROFILES); IPR013519 (PROSITE_PROFILES); IPR013519 (PROSITE_PROFILES); IPR013519 (PROSITE_PROFILES); SSF69179 (SUPERFAMILY); SSF69179 (SUPERFAMILY); SSF69179 (SUPERFAMILY); SSF69318 (SUPERFAMILY); TMhelix (TMHMM)                                                      |
| 2237 | 302362_length_3441_cvg_22.6_tip_1_3 | 1064 | hemocyte protein-glutamine gamma-glutamyltransferase-like    | 1147 | 0         | 67.80% | 0.101 | Coil (COILS); IPR002931 (SMART); IPR013783 (G3DSA:2.60.40.GENE3D); IPR008958 (PFAM); IPR013783 (G3DSA:2.60.40.GENE3D); IPR001102 (PFAM); IPR002931 (G3DSA:3.90.260.GENE3D); IPR002931 (PFAM); IPR013783 (G3DSA:2.60.40.GENE3D); PTHR11590:SF40 (PANTHER); IPR023608 (PANTHER); IPR013808 (PROSITE_PATTERNS); TRANSMEMBRANE (PHOBIUS); NON_CYTOPLASMIC_DOMAIN (PHOBIUS); CYTOPLASMIC_DOMAIN (PHOBIUS); TRANSMEMBRANE (PHOBIUS); TRANSMEMBRANE (PHOBIUS); NON_CYTOPLASMIC_DOMAIN (PHOBIUS); CYTOPLASMIC_DOMAIN (PHOBIUS); IPR008958 (SUPERFAMILY); IPR014756 (SUPERFAMILY); SSF54001 (SUPERFAMILY); TMhelix (TMHMM); TMhelix (TMHMM); TMhelix (TMHMM)                                        |
| 2238 | 302388_length_3517_cvg_20.7_tip_1_3 | 1041 | cytosolic 10-formyltetrahydrofolate dehydrogenase isoform x1 | 1173 | 0         | 83.50% | 0.123 | Coil (COILS); Coil (COILS); IPR016163 (G3DSA:3.40.309.GENE3D); IPR005793 (PFAM); IPR015590 (PFAM); IPR009081 (G3DSA:1.10.1200.GENE3D); IPR016162 (G3DSA:3.40.605.GENE3D); IPR009081 (PFAM); IPR005793 (G3DSA:3.10.25.GENE3D); IPR002376 (PFAM); IPR002376 (G3DSA:3.40.50.GENE3D); PTHR11699 (PANTHER); PTHR11699:SF118 (PANTHER); IPR029510 (PROSITE_PATTERNS); IPR016160 (PROSITE_PATTERNS); IPR001555 (PROSITE_PATTERNS); IPR009081 (PROSITE_PROFILES); IPR009081 (SUPERFAMILY); IPR002376 (SUPERFAMILY); IPR016161 (SUPERFAMILY); IPR011034 (SUPERFAMILY)                                                                                                                               |
| 2239 | 302394_length_3529_cvg_18.7_tip_1_4 | 929  | glucose-6-phosphate isomerase                                | 1176 | 0         | 87.70% | 0.103 | IPR001672 (PRINTS); IPR001672 (PFAM); G3DSA:3.40.50.10490 (GENE3D); IPR023096 (G3DSA:1.10.1390.GENE3D); IPR001672 (PANTHER); PTHR11469:SF4 (PANTHER); IPR018189 (PROSITE_PATTERNS); IPR018189 (PROSITE_PATTERNS); NON_CYTOPLASMIC_DOMAIN (PHOBIUS); NON_CYTOPLASMIC_DOMAIN (PHOBIUS); TRANSMEMBRANE (PHOBIUS); TRANSMEMBRANE (PHOBIUS); NON_CYTOPLASMIC_DOMAIN (PHOBIUS); CYTOPLASMIC_DOMAIN (PHOBIUS); NON_CYTOPLASMIC_DOMAIN (PHOBIUS); CYTOPLASMIC_DOMAIN (PHOBIUS); TRANSMEMBRANE (PHOBIUS); TRANSMEMBRANE (PHOBIUS); CYTOPLASMIC_DOMAIN (PHOBIUS); TRANSMEMBRANE (PHOBIUS); IPR001672 (PROSITE_PROFILES); IPR001672 (HAMAP); SSF53697 (SUPERFAMILY); TMhelix (TMHMM); TMhelix (TMHMM) |
| 2240 | 302398_length_3539_cvg_9.3_tip_1_2  | 505  | puromycin-sensitive aminopeptidase-like                      | 1179 | 0         | 78.80% | 0.218 | Coil (COILS); IPR014782 (PRINTS); IPR024571 (PFAM); IPR014782 (PFAM); G3DSA:1.10.390.10 (GENE3D); IPR001930 (PANTHER); PTHR11533:SF163 (PANTHER); CYTOPLASMIC_DOMAIN (PHOBIUS); NON_CYTOPLASMIC_DOMAIN (PHOBIUS); TRANSMEMBRANE (PHOBIUS); SSF55486 (SUPERFAMILY); SSF63737 (SUPERFAMILY)                                                                                                                                                                                                                                                                                                                                                                                                  |

|      |                                     |      |                                                       |      |          |        |       |                                                                                                                                                                                                                                                                                                                                                                                                                                                                                                                                                                                                                                                                                                                                                                                                   |
|------|-------------------------------------|------|-------------------------------------------------------|------|----------|--------|-------|---------------------------------------------------------------------------------------------------------------------------------------------------------------------------------------------------------------------------------------------------------------------------------------------------------------------------------------------------------------------------------------------------------------------------------------------------------------------------------------------------------------------------------------------------------------------------------------------------------------------------------------------------------------------------------------------------------------------------------------------------------------------------------------------------|
| 2241 | 302408_length_3568_cvg_32.4_tip_1_1 | 1548 | agap005124-pc-like protein                            | 1189 | 0        | 78.10% | 0.217 | Coil (COILS); IPR016162 (G3DSA:3.40.605.GENE3D); IPR016163 (G3DSA:3.40.309.GENE3D); IPR015590 (PFAM); PTHR11699 (PANTHER); PTHR11699:SF15 (PANTHER); IPR029510 (PROSITE_PATTERNS); CYTOPLASMIC_DOMAIN (PHOBIUS); NON_CYTOPLASMIC_DOMAIN (PHOBIUS); TRANSMEMBRANE (PHOBIUS); IPR016161 (SUPERFAMILY)                                                                                                                                                                                                                                                                                                                                                                                                                                                                                               |
| 2242 | 302410_length_3569_cvg_27.6_tip_1_3 | 1524 | lethal giant larvae protein homolog 1-like isoform x3 | 1190 | 0        | 67.10% | 0.125 | Coil (COILS); Coil (COILS); IPR000664 (PRINTS); IPR013905 (PFAM); IPR015943 (G3DSA:2.130.10.GENE3D); PTHR10241:SF28 (PANTHER); PTHR10241 (PANTHER); IPR019775 (PROSITE_PATTERNS); IPR001680 (PROSITE_PROFILES); IPR017986 (SUPERFAMILY)                                                                                                                                                                                                                                                                                                                                                                                                                                                                                                                                                           |
| 2243 | 302412_length_3574_cvg_56.6_tip_1_4 | 4320 | vitellogenin fused with superoxide dismutase          | 1191 | 4.11E-91 | 43.70% | 0.207 | IPR001846 (SMART); IPR015818 (G3DSA:2.20.80.GENE3D); IPR001846 (PFAM); IPR011030 (G3DSA:1.25.10.GENE3D); IPR015255 (PFAM); PTHR23345:SF1 (PANTHER); PTHR23345 (PANTHER); TRANSMEMBRANE (PHOBIUS); TRANSMEMBRANE (PHOBIUS); NON_CYTOPLASMIC_DOMAIN (PHOBIUS); CYTOPLASMIC_DOMAIN (PHOBIUS); NON_CYTOPLASMIC_DOMAIN (PHOBIUS); IPR001846 (PROSITE_PROFILES); IPR015819 (SUPERFAMILY); TMhelix (TMHMM); TMhelix (TMHMM)                                                                                                                                                                                                                                                                                                                                                                              |
| 2244 | 302422_length_3587_cvg_7.8_tip_1_3  | 455  | sodium calcium exchanger 2 isoform x1                 | 1196 | 0        | 77.30% | 0.156 | IPR004836 (PRINTS); IPR003644 (SMART); IPR004836 (TIGRFAM); IPR004837 (PFAM); IPR003644 (PFAM); PTHR11878 (PANTHER); CYTOPLASMIC_DOMAIN (PHOBIUS); NON_CYTOPLASMIC_DOMAIN (PHOBIUS); CYTOPLASMIC_DOMAIN (PHOBIUS); TRANSMEMBRANE (PHOBIUS); TRANSMEMBRANE (PHOBIUS); NON_CYTOPLASMIC_DOMAIN (PHOBIUS); TRANSMEMBRANE (PHOBIUS); TRANSMEMBRANE (PHOBIUS); TRANSMEMBRANE (PHOBIUS); NON_CYTOPLASMIC_DOMAIN (PHOBIUS); NON_CYTOPLASMIC_DOMAIN (PHOBIUS); CYTOPLASMIC_DOMAIN (PHOBIUS); TRANSMEMBRANE (PHOBIUS); TRANSMEMBRANE (PHOBIUS); TRANSMEMBRANE (PHOBIUS); TRANSMEMBRANE (PHOBIUS); SSF141072 (SUPERFAMILY); SSF141072 (SUPERFAMILY); TMhelix (TMHMM); TMhelix (TMHMM) |
| 2245 | 302434_length_3619_cvg_12.2_tip_1_5 | 506  | insulin-degrading enzyme                              | 1206 | 0        | 76.50% | 0.26  | Coil (COILS); IPR011237 (G3DSA:3.30.830.GENE3D); IPR007863 (PFAM); IPR011237 (G3DSA:3.30.830.GENE3D); IPR011765 (PFAM); IPR011237 (G3DSA:3.30.830.GENE3D); IPR011237 (G3DSA:3.30.830.GENE3D); PTHR11851 (PANTHER); PTHR11851:SF85 (PANTHER); IPR001431 (PROSITE_PATTERNS); IPR011249 (SUPERFAMILY); IPR011249 (SUPERFAMILY); IPR011249 (SUPERFAMILY); IPR011249 (SUPERFAMILY)                                                                                                                                                                                                                                                                                                                                                                                                                     |
| 2246 | 302452_length_3674_cvg_32.4_tip_1_4 | 1795 | titin                                                 | 1225 | 0        | 82.60% | 0.117 | Coil (COILS); IPR003599 (SMART); IPR003598 (SMART); IPR013783 (G3DSA:2.60.40.GENE3D); IPR010939 (PFAM); IPR013783 (G3DSA:2.60.40.GENE3D); IPR013783 (G3DSA:2.60.40.GENE3D); IPR013783 (G3DSA:2.60.40.GENE3D); IPR013098 (PFAM); PTHR19897:SF149 (PANTHER); PTHR19897 (PANTHER); IPR007110 (PROSITE_PROFILES); SSF48726 (SUPERFAMILY); SSF48726 (SUPERFAMILY)                                                                    |
| 2247 | 302456_length_3675_cvg_31.6_tip_1_5 | 1782 | c-1-tetrahydrofolate cytoplasmic                      | 1225 | 0        | 83.30% | 0.179 | Coil (COILS); IPR000672 (PRINTS); G3DSA:3.30.1510.10 (GENE3D); IPR027417 (G3DSA:3.40.50.GENE3D); IPR020630 (PFAM); G3DSA:3.40.192.10 (GENE3D); IPR000559 (PFAM); G3DSA:3.10.410.10 (GENE3D); IPR016040 (G3DSA:3.40.50.GENE3D); IPR020631 (PFAM); PTHR10025 (PANTHER); IPR020867 (PROSITE_PATTERNS); IPR020628 (PROSITE_PATTERNS); IPR020867 (PROSITE_PATTERNS); IPR020628 (PROSITE_PATTERNS); IPR000672 (HAMAP); IPR000559 (HAMAP); SSF51735 (SUPERFAMILY); IPR027417 (SUPERFAMILY); SSF53223 (SUPERFAMILY)                                                                                                                                                                                                                                                                                       |
| 2248 | 302478_length_3743_cvg_50.9_tip_1_5 | 3901 | sarcolumenin isoform x2                               | 1247 | 0        | 79.80% | 0.116 | IPR027417 (G3DSA:3.40.50.GENE3D); IPR006073 (PFAM); PTHR11216:SF66 (PANTHER); PTHR11216 (PANTHER); NON_CYTOPLASMIC_DOMAIN (PHOBIUS); TRANSMEMBRANE (PHOBIUS); CYTOPLASMIC_DOMAIN (PHOBIUS); TRANSMEMBRANE (PHOBIUS); NON_CYTOPLASMIC_DOMAIN (PHOBIUS); IPR030381 (PROSITE_PROFILES); IPR027417 (SUPERFAMILY); TMhelix (TMHMM)                                                                                                                                                                                                                                                                                                                                                                                                                                                                     |





|      |                                     |      |                                                   |      |           |        |         |                                                                                                                                                                                                                                                                                                                                                                                                                                                                                                                                                                                                                                                                                                                                                                                                                                                                                                                                                                                                                                                                                                                                                                                                                                                                                                                        |
|------|-------------------------------------|------|---------------------------------------------------|------|-----------|--------|---------|------------------------------------------------------------------------------------------------------------------------------------------------------------------------------------------------------------------------------------------------------------------------------------------------------------------------------------------------------------------------------------------------------------------------------------------------------------------------------------------------------------------------------------------------------------------------------------------------------------------------------------------------------------------------------------------------------------------------------------------------------------------------------------------------------------------------------------------------------------------------------------------------------------------------------------------------------------------------------------------------------------------------------------------------------------------------------------------------------------------------------------------------------------------------------------------------------------------------------------------------------------------------------------------------------------------------|
| 2259 | 302596_length_4334_cvg_8.3_tip_1_5  | 506  | glutamyl aminopeptidase                           | 1444 | 0         | 63.60% | 0.111   | IPR014782 (PRINTS); G3DSA:1.10.390.10 (GENE3D); IPR014782 (PFAM); IPR024571 (PFAM); IPR001930 (PANTHER); PTHR11533:SF165 (PANTHER); CYTOPLASMIC_DOMAIN (PHOBIUS); TRANSMEMBRANE (PHOBIUS); NON_CYTOPLASMIC_DOMAIN (PHOBIUS); SSF63737 (SUPERFAMILY); SSF55486 (SUPERFAMILY); TMhelix (TMHMM)                                                                                                                                                                                                                                                                                                                                                                                                                                                                                                                                                                                                                                                                                                                                                                                                                                                                                                                                                                                                                           |
| 2260 | 302598_length_4353_cvg_17.5_tip_1_2 | 963  | nad mitochondrial                                 | 1451 | 0         | 83.70% | 0.146   | IPR007886 (SMART); IPR007698 (SMART); IPR012136 (PFAM); IPR029035 (G3DSA:3.40.50.GENE3D); IPR007886 (PFAM); IPR024605 (PFAM); G3DSA:3.40.50.1770 (GENE3D); IPR026255 (TIGRFAM); IPR007698 (PFAM); G3DSA:3.40.50.1770 (GENE3D); PTHR10160 (PANTHER); PTHR10160:SF19 (PANTHER); NON_CYTOPLASMIC_DOMAIN (PHOBIUS); TRANSMEMBRANE (PHOBIUS); TRANSMEMBRANE (PHOBIUS); NON_CYTOPLASMIC_DOMAIN (PHOBIUS); CYTOPLASMIC_DOMAIN (PHOBIUS); TRANSMEMBRANE (PHOBIUS); NON_CYTOPLASMIC_DOMAIN (PHOBIUS); TRANSMEMBRANE (PHOBIUS); NON_CYTOPLASMIC_DOMAIN (PHOBIUS); CYTOPLASMIC_DOMAIN (PHOBIUS); CYTOPLASMIC_DOMAIN (PHOBIUS); TRANSMEMBRANE (PHOBIUS); TRANSMEMBRANE (PHOBIUS); TRANSMEMBRANE (PHOBIUS); TRANSMEMBRANE (PHOBIUS); CYTOPLASMIC_DOMAIN (PHOBIUS); TRANSMEMBRANE (PHOBIUS); CYTOPLASMIC_DOMAIN (PHOBIUS); TRANSMEMBRANE (PHOBIUS); TRANSMEMBRANE (PHOBIUS); CYTOPLASMIC_DOMAIN (PHOBIUS); TRANSMEMBRANE (PHOBIUS); TRANSMEMBRANE (PHOBIUS); NON_CYTOPLASMIC_DOMAIN (PHOBIUS); TRANSMEMBRANE (PHOBIUS); TRANSMEMBRANE (PHOBIUS); NON_CYTOPLASMIC_DOMAIN (PHOBIUS); SSF52283 (SUPERFAMILY); IPR029035 (SUPERFAMILY); SSF51735 (SUPERFAMILY); TMhelix (TMHMM); TMhelix (TMHMM) |
| 2261 | 302600_length_4384_cvg_5.9_tip_1_1  | 419  | urokinase-type plasminogen activator              | 1461 | 7.87E-59  | 56.00% | 0.211   | IPR002172 (PRINTS); IPR001254 (SMART); IPR002172 (SMART); IPR003609 (SMART); IPR003014 (PFAM); IPR002172 (G3DSA:4.10.400.GENE3D); G3DSA:2.40.10.10 (GENE3D); IPR002172 (G3DSA:4.10.400.GENE3D); IPR002172 (PFAM); G3DSA:2.40.10.10 (GENE3D); G3DSA:2.40.10.10 (GENE3D); G3DSA:3.50.4.10 (GENE3D); IPR001254 (PFAM); PTHR24265 (PANTHER); IPR018114 (PROSITE_PATTERNS); IPR018114 (PROSITE_PATTERNS); IPR023415 (PROSITE_PATTERNS); TRANSMEMBRANE (PHOBIUS); TRANSMEMBRANE (PHOBIUS); NON_CYTOPLASMIC_DOMAIN (PHOBIUS); TRANSMEMBRANE (PHOBIUS); CYTOPLASMIC_DOMAIN (PHOBIUS); CYTOPLASMIC_DOMAIN (PHOBIUS); CYTOPLASMIC_DOMAIN (PHOBIUS); TRANSMEMBRANE (PHOBIUS); NON_CYTOPLASMIC_DOMAIN (PHOBIUS); IPR002172 (PROSITE_PROFILES); IPR002172 (PROSITE_PROFILES); IPR003609 (PROSITE_PROFILES); IPR003609 (PROSITE_PROFILES); IPR002172 (PROSITE_PROFILES); IPR003609 (PROSITE_PROFILES); IPR002172 (PROSITE_PROFILES); IPR003609 (PROSITE_PROFILES); IPR001254 (PROSITE_PROFILES); IPR003609 (PROSITE_PROFILES); IPR002172 (SUPERFAMILY); IPR009003 (SUPERFAMILY); IPR002172 (SUPERFAMILY); IPR002172 (SUPERFAMILY); IPR002172 (SUPERFAMILY); TMhelix (TMHMM); TMhelix (TMHMM)                                                                                                                                         |
| 2262 | 302602_length_4388_cvg_13.7_tip_1_2 | 952  | angiotensin-converting enzyme                     | 1462 | 0         | 59.30% | 0.438 Y | Coil (COILS); Coil (COILS); IPR001548 (PRINTS); IPR002000 (PFAM); IPR001548 (PFAM); IPR001548 (PANTHER); PTHR10514:SF17 (PANTHER); CYTOPLASMIC_DOMAIN (PHOBIUS); NON_CYTOPLASMIC_DOMAIN (PHOBIUS); TRANSMEMBRANE (PHOBIUS); NON_CYTOPLASMIC_DOMAIN (PHOBIUS); TRANSMEMBRANE (PHOBIUS); TRANSMEMBRANE (PHOBIUS); TRANSMEMBRANE (PHOBIUS); CYTOPLASMIC_DOMAIN (PHOBIUS); CYTOPLASMIC_DOMAIN (PHOBIUS); SignalP-TM (SIGNALP_GRAM_POSITIVE); SSF55486 (SUPERFAMILY); SSF55486 (SUPERFAMILY); TMhelix (TMHMM); TMhelix (TMHMM); TMhelix (TMHMM)                                                                                                                                                                                                                                                                                                                                                                                                                                                                                                                                                                                                                                                                                                                                                                             |
| 2263 | 302608_length_4402_cvg_40.4_tip_1_2 | 3048 | inter-alpha-trypsin inhibitor heavy chain h4-like | 1467 | 2.92E-162 | 53.20% | 0.115   | Coil (COILS); IPR013694 (SMART); IPR002035 (SMART); IPR006604 (SMART); IPR013694 (PFAM); IPR002035 (G3DSA:3.40.50.GENE3D); IPR002035 (PFAM); PTHR10338:SF108 (PANTHER); PTHR10338 (PANTHER); TRANSMEMBRANE (PHOBIUS); CYTOPLASMIC_DOMAIN (PHOBIUS); NON_CYTOPLASMIC_DOMAIN (PHOBIUS); IPR002035 (PROSITE_PROFILES); IPR013694 (PROSITE_PROFILES); IPR002035 (SUPERFAMILY)                                                                                                                                                                                                                                                                                                                                                                                                                                                                                                                                                                                                                                                                                                                                                                                                                                                                                                                                              |



|      |                                     |      |                                                                                                                                                                                                                       |      |           |        |         |                                                                                                                                                                                                                                                                                                                                                                                                                                                                                                                                                                                                                                                                                                                                                                                                                                                                                                                                                                                                                                                                                                   |
|------|-------------------------------------|------|-----------------------------------------------------------------------------------------------------------------------------------------------------------------------------------------------------------------------|------|-----------|--------|---------|---------------------------------------------------------------------------------------------------------------------------------------------------------------------------------------------------------------------------------------------------------------------------------------------------------------------------------------------------------------------------------------------------------------------------------------------------------------------------------------------------------------------------------------------------------------------------------------------------------------------------------------------------------------------------------------------------------------------------------------------------------------------------------------------------------------------------------------------------------------------------------------------------------------------------------------------------------------------------------------------------------------------------------------------------------------------------------------------------|
| 2264 | 302616_length_4460_cvg_26.7_tip_1_2 | 1303 | epithelial chloride channel partial                                                                                                                                                                                   | 1486 | 0         | 52.00% | 0.185   | Coil (COILS); IPR002035 (SMART); IPR003961 (SMART); IPR002035 (G3DSA:3.40.50.GENE3D); IPR015394 (PFAM); IPR013642 (PFAM); IPR013783 (G3DSA:2.60.40.GENE3D); PF13519 (PFAM); PTHR10579:SF8 (PANTHER); PTHR10579 (PANTHER); TRANSMEMBRANE (PHOBIUS); NON_CYTOPLASMIC_DOMAIN (PHOBIUS); TRANSMEMBRANE (PHOBIUS); TRANSMEMBRANE (PHOBIUS); CYTOPLASMIC_DOMAIN (PHOBIUS); NON_CYTOPLASMIC_DOMAIN (PHOBIUS); CYTOPLASMIC_DOMAIN (PHOBIUS); NON_CYTOPLASMIC_DOMAIN (PHOBIUS); TRANSMEMBRANE (PHOBIUS); TRANSMEMBRANE (PHOBIUS); CYTOPLASMIC_DOMAIN (PHOBIUS); NON_CYTOPLASMIC_DOMAIN (PHOBIUS); IPR002035 (PROSITE_PROFILES); IPR002035 (SUPERFAMILY); IPR003961 (SUPERFAMILY); TMhelix (TMHMM); TMhelix (TMHMM); TMhelix (TMHMM)                                                                                                                                                                                                                                                                                                                                                                        |
| 2265 | 302626_length_4503_cvg_28.2_tip_1_1 | 1987 | myosin heavy non-muscle                                                                                                                                                                                               | 1501 | 0         | 89.00% | 0.115   | Coil (COILS); IPR001609 (SMART); IPR001609 (PFAM); G3DSA:1.20.5.340 (GENE3D); IPR002928 (PFAM); IPR027401 (G3DSA:4.10.270.GENE3D); PTHR13140 (PANTHER); PTHR13140:SF301 (PANTHER); IPR000048 (PROSITE_PROFILES); IPR001609 (PROSITE_PROFILES); SSF90257 (SUPERFAMILY); SSF57997 (SUPERFAMILY); SSF90257 (SUPERFAMILY); IPR027417 (SUPERFAMILY); SSF90257 (SUPERFAMILY); SSF90257 (SUPERFAMILY)                                                                                                                                                                                                                                                                                                                                                                                                                                                                                                                                                                                    |
| 2266 | 302628_length_4515_cvg_52.9_tip_0_0 | 5657 | aplp_locmi ame: full=apolipophorins contains: ame: full=apolipophorin-2 ame: full=apolipophorin ii ame: full=apolp-2 contains: ame: full=apolipophorin-1 ame: full=apolipophorin i ame: full=apolp-1 flags: precursor | 1505 | 1.25E-105 | 49.30% | 0.099   | Coil (COILS); IPR001846 (SMART); IPR001846 (PFAM); IPR014853 (PFAM); PTHR23361:SF13 (PANTHER); PTHR23361 (PANTHER); CYTOPLASMIC_DOMAIN (PHOBIUS); TRANSMEMBRANE (PHOBIUS); NON_CYTOPLASMIC_DOMAIN (PHOBIUS); IPR001846 (PROSITE_PROFILES); TMhelix (TMHMM)                                                                                                                                                                                                                                                                                                                                                                                                                                                                                                                                                                                                                                                                                                                                                                                                                                        |
| 2267 | 302632_length_4535_cvg_17.1_tip_1_1 | 968  | Supervillin, partial                                                                                                                                                                                                  | 1512 | 0         | 64.10% | 0.099   | Coil (COILS); Coil (COILS); IPR007122 (PRINTS); IPR007122 (SMART); IPR003128 (SMART); IPR003128 (PFAM); IPR007123 (PFAM); IPR003128 (G3DSA:1.10.950.GENE3D); IPR029006 (G3DSA:3.40.20.GENE3D); IPR029006 (G3DSA:3.40.20.GENE3D); IPR015628 (PTHR11977:PANTHER); IPR007122 (PANTHER); IPR003128 (PROSITE_PROFILES); SSF55753 (SUPERFAMILY); SSF55753 (SUPERFAMILY); SSF55753 (SUPERFAMILY); SSF55753 (SUPERFAMILY); SSF55753 (SUPERFAMILY); IPR003128 (SUPERFAMILY)                                                                                                                                                                                                                                                                                                                                                                                                                                                                                                                                                                                                                                |
| 2268 | 302644_length_4679_cvg_10.7_tip_1_0 | 547  | neuroglian-like isoform 2                                                                                                                                                                                             | 1560 | 0         | 77.50% | 0.387 Y | IPR003599 (SMART); IPR003961 (SMART); IPR003598 (SMART); IPR013783 (G3DSA:2.60.40.GENE3D); PF13895 (PFAM); IPR013098 (PFAM); IPR013783 (G3DSA:2.60.40.GENE3D); IPR013783 (G3DSA:2.60.40.GENE3D); IPR013783 (G3DSA:2.60.40.GENE3D); IPR013783 (G3DSA:2.60.40.GENE3D); IPR003961 (PFAM); IPR013783 (G3DSA:2.60.40.GENE3D); IPR013783 (G3DSA:2.60.40.GENE3D); IPR013783 (G3DSA:2.60.40.GENE3D); IPR026966 (PFAM); PTHR10489 (PANTHER); PTHR10489:SF553 (PANTHER); TRANSMEMBRANE (PHOBIUS); CYTOPLASMIC_DOMAIN (PHOBIUS); NON_CYTOPLASMIC_DOMAIN (PHOBIUS); IPR003961 (PROSITE_PROFILES); IPR003961 (PROSITE_PROFILES); IPR007110 (PROSITE_PROFILES); IPR007110 (PROSITE_PROFILES); IPR007110 (PROSITE_PROFILES); IPR007110 (PROSITE_PROFILES); IPR007110 (PROSITE_PROFILES); IPR003961 (PROSITE_PROFILES); IPR003961 (PROSITE_PROFILES); IPR003961 (SUPERFAMILY); SSF48726 (SUPERFAMILY); SSF48726 (SUPERFAMILY); SSF48726 (SUPERFAMILY); SSF48726 (SUPERFAMILY); IPR003961 (SUPERFAMILY); SSF48726 (SUPERFAMILY); SSF48726 (SUPERFAMILY); IPR003961 (SUPERFAMILY); TMhelix (TMHMM); TMhelix (TMHMM) |
| 2269 | 302646_length_4684_cvg_60.3_tip_1_1 | 8752 | von willebrand factor a domain-containing protein 7                                                                                                                                                                   | 1561 | 9.06E-88  | 44.90% | 0.121   | PF13519 (PFAM); PTHR14905 (PANTHER); NON_CYTOPLASMIC_DOMAIN (PHOBIUS); TRANSMEMBRANE (PHOBIUS); CYTOPLASMIC_DOMAIN (PHOBIUS); TRANSMEMBRANE (PHOBIUS); TRANSMEMBRANE (PHOBIUS); CYTOPLASMIC_DOMAIN (PHOBIUS); NON_CYTOPLASMIC_DOMAIN (PHOBIUS); IPR002035 (SUPERFAMILY); TMhelix (TMHMM); TMhelix (TMHMM); TMhelix (TMHMM)                                                                                                                                                                                                                                                                                                                                                                                                                                                                                                                                                                                                                                                                                                                                                                        |
| 2270 | 302650_length_4698_cvg_57.4_tip_1_5 | 5375 | low quality protein: hemocytin-like                                                                                                                                                                                   | 1566 | 1.94E-67  | 39.50% | 0.432 Y | IPR014853 (SMART); IPR001846 (SMART); PTHR11339 (PANTHER); PTHR11339:SF25 (PANTHER); IPR001007 (PROSITE_PATTERNS); CYTOPLASMIC_DOMAIN (PHOBIUS); TRANSMEMBRANE (PHOBIUS); NON_CYTOPLASMIC_DOMAIN (PHOBIUS); IPR001846 (PROSITE_PROFILES); IPR001846 (PROSITE_PROFILES); IPR002919 (SUPERFAMILY); IPR002919 (SUPERFAMILY)                                                                                                                                                                                                                                                                                                                                                                                                                                                                                                                                                                                                                                                                                                                                                                          |



|      |                                     |        |                                              |      |          |        |       |                                                                                                                                                                                                                                                                                                                                                                                                                                                                                                                                                                                                                                                                                                                                                                                                                                                                                                                                                                                                                        |
|------|-------------------------------------|--------|----------------------------------------------|------|----------|--------|-------|------------------------------------------------------------------------------------------------------------------------------------------------------------------------------------------------------------------------------------------------------------------------------------------------------------------------------------------------------------------------------------------------------------------------------------------------------------------------------------------------------------------------------------------------------------------------------------------------------------------------------------------------------------------------------------------------------------------------------------------------------------------------------------------------------------------------------------------------------------------------------------------------------------------------------------------------------------------------------------------------------------------------|
| 2276 | 302692_length_5263_cvg_28.9_tip_1_4 | 1741   | ring finger protein nhl-1                    | 1754 | 0        | 74.10% | 0.197 | Coil (COILS); Coil (COILS); IPR001841 (SMART); IPR013083 (G3DSA:3.30.40.GENE3D); IPR018957 (PFAM); IPR011042 (G3DSA:2.120.10.GENE3D); IPR001258 (PFAM); PTHR24103:SF230 (PANTHER); PTHR24103 (PANTHER); IPR013017 (PROSITE_PROFILES); IPR001841 (PROSITE_PROFILES); IPR013017 (PROSITE_PROFILES); IPR013017 (PROSITE_PROFILES); IPR013017 (PROSITE_PROFILES); IPR013017 (PROSITE_PROFILES); IPR000315 (PROSITE_PROFILES); IPR013017 (PROSITE_PROFILES); SSF57850 (SUPERFAMILY); SSF101898 (SUPERFAMILY)                                                                                                                                                                                                                                                                                                                                                                                                                                                                                                                |
| 2277 | 302702_length_5374_cvg_64.8_tip_1_2 | 259270 | vitellogenin fused with superoxide dismutase | 1791 | 0        | 45.70% | 0.196 | IPR001747 (SMART); IPR001846 (SMART); IPR015816 (G3DSA:2.30.230.GENE3D); IPR015255 (PFAM); IPR015818 (G3DSA:2.20.80.GENE3D); IPR001846 (PFAM); IPR011030 (G3DSA:1.25.10.GENE3D); IPR001747 (PFAM); PTHR23345:SF1 (PANTHER); PTHR23345 (PANTHER); TRANSMEMBRANE (PHOBIUS); TRANSMEMBRANE (PHOBIUS); NON_CYTOPLASMIC_DOMAIN (PHOBIUS); CYTOPLASMIC_DOMAIN (PHOBIUS); CYTOPLASMIC_DOMAIN (PHOBIUS); NON_CYTOPLASMIC_DOMAIN (PHOBIUS); TRANSMEMBRANE (PHOBIUS); IPR001846 (PROSITE_PROFILES); IPR001747 (PROSITE_PROFILES); IPR015819 (SUPERFAMILY); IPR015819 (SUPERFAMILY); IPR011030 (SUPERFAMILY); TMhelix (TMHMM)                                                                                                                                                                                                                                                                                                                                                                                                     |
| 2278 | 302706_length_5387_cvg_62.9_tip_1_0 | 101262 | hypothetical protein DAPPUDRAFT_332703       | 1796 | 0        | 51.90% | 0.107 | Coil (COILS); IPR001846 (SMART); IPR014853 (SMART); IPR014853 (PFAM); IPR002035 (G3DSA:3.40.50.GENE3D); IPR001846 (PFAM); PTHR23361 (PANTHER); PTHR23361:SF13 (PANTHER); NON_CYTOPLASMIC_DOMAIN (PHOBIUS); NON_CYTOPLASMIC_DOMAIN (PHOBIUS); CYTOPLASMIC_DOMAIN (PHOBIUS); TRANSMEMBRANE (PHOBIUS); CYTOPLASMIC_DOMAIN (PHOBIUS); TRANSMEMBRANE (PHOBIUS); NON_CYTOPLASMIC_DOMAIN (PHOBIUS); TRANSMEMBRANE (PHOBIUS); TRANSMEMBRANE (PHOBIUS); IPR001846 (PROSITE_PROFILES); IPR002035 (SUPERFAMILY); TMhelix (TMHMM); TMhelix (TMHMM); TMhelix (TMHMM); TMhelix (TMHMM)                                                                                                                                                                                                                                                                                                                                                                                                                                               |
| 2279 | 302718_length_5567_cvg_34.7_tip_1_1 | 4412   | myosin light chain smooth muscle             | 1856 | 0        | 59.20% | 0.112 | Coil (COILS); IPR003599 (SMART); IPR003598 (SMART); IPR003961 (SMART); IPR013106 (SMART); IPR013783 (G3DSA:2.60.40.GENE3D); IPR013783 (G3DSA:2.60.40.GENE3D); IPR003961 (PFAM); IPR013783 (G3DSA:2.60.40.GENE3D); IPR013783 (G3DSA:2.60.40.GENE3D); IPR013783 (G3DSA:2.60.40.GENE3D); IPR013098 (PFAM); IPR013783 (G3DSA:2.60.40.GENE3D); IPR013783 (G3DSA:2.60.40.GENE3D); IPR013783 (G3DSA:2.60.40.GENE3D); PTHR19897 (PANTHER); IPR007110 (PROSITE_PROFILES); IPR003961 (PROSITE_PROFILES); IPR007110 (PROSITE_PROFILES); SSF48726 (SUPERFAMILY); IPR003961 (SUPERFAMILY); SSF48726 (SUPERFAMILY) |
| 2280 | 302722_length_5657_cvg_43.2_tip_1_5 | 3296   | von willebrand factor                        | 1885 | 1.64E-27 | 41.50% | 0.11  | IPR001007 (SMART); IPR001007 (PROSITE_PROFILES); IPR006207 (PROSITE_PROFILES)                                                                                                                                                                                                                                                                                                                                                                                                                                                                                                                                                                                                                                                                                                                                                                                                                                                                                                                                          |

|      |                                     |      |                                           |      |          |        |       |  |                                                                                                                                                                                                                                                                                                                                                                                                                                                                                                                                                                                                                                                                                                                                                                                                                                                                                                                                                                                                                                                                                                                                                                                                                                                                                                                                                                                                                                                                                                                                                                                                                                                                                                                                                                                                                                                                                                                                                                                                                                                                                                                                                                                                                                                                                                                                                                                                                                                                                                                                                                                                                                                                                                                                                                                                 |
|------|-------------------------------------|------|-------------------------------------------|------|----------|--------|-------|--|-------------------------------------------------------------------------------------------------------------------------------------------------------------------------------------------------------------------------------------------------------------------------------------------------------------------------------------------------------------------------------------------------------------------------------------------------------------------------------------------------------------------------------------------------------------------------------------------------------------------------------------------------------------------------------------------------------------------------------------------------------------------------------------------------------------------------------------------------------------------------------------------------------------------------------------------------------------------------------------------------------------------------------------------------------------------------------------------------------------------------------------------------------------------------------------------------------------------------------------------------------------------------------------------------------------------------------------------------------------------------------------------------------------------------------------------------------------------------------------------------------------------------------------------------------------------------------------------------------------------------------------------------------------------------------------------------------------------------------------------------------------------------------------------------------------------------------------------------------------------------------------------------------------------------------------------------------------------------------------------------------------------------------------------------------------------------------------------------------------------------------------------------------------------------------------------------------------------------------------------------------------------------------------------------------------------------------------------------------------------------------------------------------------------------------------------------------------------------------------------------------------------------------------------------------------------------------------------------------------------------------------------------------------------------------------------------------------------------------------------------------------------------------------------------|
|      |                                     |      |                                           |      |          |        |       |  | CYTOPLASMIC_DOMAIN (PHOBIUS); TRANSMEMBRANE (PHOBIUS);<br>CYTOPLASMIC_DOMAIN (PHOBIUS); CYTOPLASMIC_DOMAIN (PHOBIUS);<br>TRANSMEMBRANE (PHOBIUS); NON_CYTOPLASMIC_DOMAIN (PHOBIUS);<br>TRANSMEMBRANE (PHOBIUS); NON_CYTOPLASMIC_DOMAIN (PHOBIUS);<br>NON_CYTOPLASMIC_DOMAIN (PHOBIUS); CYTOPLASMIC_DOMAIN<br>(PHOBIUS); TRANSMEMBRANE (PHOBIUS); TRANSMEMBRANE (PHOBIUS);<br>TRANSMEMBRANE (PHOBIUS); CYTOPLASMIC_DOMAIN (PHOBIUS);<br>TRANSMEMBRANE (PHOBIUS); NON_CYTOPLASMIC_DOMAIN (PHOBIUS);<br>NON_CYTOPLASMIC_DOMAIN (PHOBIUS); NON_CYTOPLASMIC_DOMAIN<br>(PHOBIUS); CYTOPLASMIC_DOMAIN (PHOBIUS); TRANSMEMBRANE<br>(PHOBIUS); CYTOPLASMIC_DOMAIN (PHOBIUS);<br>NON_CYTOPLASMIC_DOMAIN (PHOBIUS); NON_CYTOPLASMIC_DOMAIN<br>(PHOBIUS); NON_CYTOPLASMIC_DOMAIN (PHOBIUS); TRANSMEMBRANE<br>(PHOBIUS); TRANSMEMBRANE (PHOBIUS); NON_CYTOPLASMIC_DOMAIN<br>(PHOBIUS); TRANSMEMBRANE (PHOBIUS); CYTOPLASMIC_DOMAIN<br>(PHOBIUS); NON_CYTOPLASMIC_DOMAIN (PHOBIUS); TRANSMEMBRANE<br>(PHOBIUS); CYTOPLASMIC_DOMAIN (PHOBIUS); TRANSMEMBRANE<br>(PHOBIUS); TRANSMEMBRANE (PHOBIUS); TRANSMEMBRANE (PHOBIUS);<br>TRANSMEMBRANE (PHOBIUS); CYTOPLASMIC_DOMAIN (PHOBIUS);<br>TRANSMEMBRANE (PHOBIUS); NON_CYTOPLASMIC_DOMAIN (PHOBIUS);<br>NON_CYTOPLASMIC_DOMAIN (PHOBIUS); CYTOPLASMIC_DOMAIN<br>(PHOBIUS); TRANSMEMBRANE (PHOBIUS); CYTOPLASMIC_DOMAIN<br>(PHOBIUS); TRANSMEMBRANE (PHOBIUS); TRANSMEMBRANE (PHOBIUS);<br>TRANSMEMBRANE (PHOBIUS); NON_CYTOPLASMIC_DOMAIN (PHOBIUS);<br>TRANSMEMBRANE (PHOBIUS); TRANSMEMBRANE (PHOBIUS);<br>TRANSMEMBRANE (PHOBIUS); TRANSMEMBRANE (PHOBIUS);<br>NON_CYTOPLASMIC_DOMAIN (PHOBIUS); TRANSMEMBRANE (PHOBIUS);<br>TRANSMEMBRANE (PHOBIUS); CYTOPLASMIC_DOMAIN (PHOBIUS);<br>TRANSMEMBRANE (PHOBIUS); CYTOPLASMIC_DOMAIN (PHOBIUS);<br>CYTOPLASMIC_DOMAIN (PHOBIUS); NON_CYTOPLASMIC_DOMAIN<br>(PHOBIUS); TRANSMEMBRANE (PHOBIUS); TRANSMEMBRANE (PHOBIUS);<br>CYTOPLASMIC_DOMAIN (PHOBIUS); TRANSMEMBRANE (PHOBIUS);<br>CYTOPLASMIC_DOMAIN (PHOBIUS); CYTOPLASMIC_DOMAIN (PHOBIUS);<br>NON_CYTOPLASMIC_DOMAIN (PHOBIUS); NON_CYTOPLASMIC_DOMAIN<br>(PHOBIUS); COIL (COILS); Coil (COILS); IPR003598 (SMART); IPR001452 (SMART);<br>IPR003599 (SMART); G3DSA:2.30.30.40 (GENE3D); IPR013783<br>(G3DSA:2.60.40.GENE3D); IPR013098 (PFAM); IPR013783<br>(G3DSA:2.60.40.GENE3D); IPR013783 (G3DSA:2.60.40.GENE3D); IPR013783<br>(G3DSA:2.60.40.GENE3D); IPR001452 (PFAM); PTHR19897 (PANTHER);<br>IPR007110 (PROSITE_PROFILES); IPR007110 (PROSITE_PROFILES);<br>IPR001452 (PROSITE_PROFILES); IPR007110 (PROSITE_PROFILES);<br>IPR007110 (PROSITE_PROFILES); IPR007110 (PROSITE_PROFILES);<br>IPR001452 (SUPERFAMILY); SSF48726 (SUPERFAMILY); SSF48726<br>(SUPERFAMILY); SSF48726 (SUPERFAMILY); SSF48726 (SUPERFAMILY);<br>SSF48726 (SUPERFAMILY) |
| 2281 | 302740_length_6173_cvg_34.6_tip_1_5 | 3001 | PREDICTED: acrosin-like                   | 2057 | 8.21E-09 | 46.00% | 0.146 |  |                                                                                                                                                                                                                                                                                                                                                                                                                                                                                                                                                                                                                                                                                                                                                                                                                                                                                                                                                                                                                                                                                                                                                                                                                                                                                                                                                                                                                                                                                                                                                                                                                                                                                                                                                                                                                                                                                                                                                                                                                                                                                                                                                                                                                                                                                                                                                                                                                                                                                                                                                                                                                                                                                                                                                                                                 |
| 2282 | 302760_length_6729_cvg_39.9_tip_1_4 | 5049 | titin- partial                            | 2243 | 0        | 60.90% | 0.101 |  |                                                                                                                                                                                                                                                                                                                                                                                                                                                                                                                                                                                                                                                                                                                                                                                                                                                                                                                                                                                                                                                                                                                                                                                                                                                                                                                                                                                                                                                                                                                                                                                                                                                                                                                                                                                                                                                                                                                                                                                                                                                                                                                                                                                                                                                                                                                                                                                                                                                                                                                                                                                                                                                                                                                                                                                                 |
| 2283 | 302762_length_7189_cvg_30.7_tip_1_5 | 2638 | hemocytin isoform x4                      | 2396 | 2.89E-37 | 43.00% | 0.137 |  |                                                                                                                                                                                                                                                                                                                                                                                                                                                                                                                                                                                                                                                                                                                                                                                                                                                                                                                                                                                                                                                                                                                                                                                                                                                                                                                                                                                                                                                                                                                                                                                                                                                                                                                                                                                                                                                                                                                                                                                                                                                                                                                                                                                                                                                                                                                                                                                                                                                                                                                                                                                                                                                                                                                                                                                                 |
| 2284 | 302768_length_7907_cvg_14.8_tip_1_2 | 1825 | multiple ankyrin repeats single kh domain | 2635 | 0        | 61.80% | 0.101 |  |                                                                                                                                                                                                                                                                                                                                                                                                                                                                                                                                                                                                                                                                                                                                                                                                                                                                                                                                                                                                                                                                                                                                                                                                                                                                                                                                                                                                                                                                                                                                                                                                                                                                                                                                                                                                                                                                                                                                                                                                                                                                                                                                                                                                                                                                                                                                                                                                                                                                                                                                                                                                                                                                                                                                                                                                 |

[illegible]

|      |                                      |       |                               |      |          |        |       |                                                                                                                                                                                                                                                                                                                                                                                                                                                                                                                                                                                                                                                                                                                                                                                                                                                                                                                                                                                                                                                                                                                                                                                                                                                                                                                                                                                                                                                                                                                                                                                                                                                                                                                                                                                                                                                                                                                                                                                                                                                                                                                        |
|------|--------------------------------------|-------|-------------------------------|------|----------|--------|-------|------------------------------------------------------------------------------------------------------------------------------------------------------------------------------------------------------------------------------------------------------------------------------------------------------------------------------------------------------------------------------------------------------------------------------------------------------------------------------------------------------------------------------------------------------------------------------------------------------------------------------------------------------------------------------------------------------------------------------------------------------------------------------------------------------------------------------------------------------------------------------------------------------------------------------------------------------------------------------------------------------------------------------------------------------------------------------------------------------------------------------------------------------------------------------------------------------------------------------------------------------------------------------------------------------------------------------------------------------------------------------------------------------------------------------------------------------------------------------------------------------------------------------------------------------------------------------------------------------------------------------------------------------------------------------------------------------------------------------------------------------------------------------------------------------------------------------------------------------------------------------------------------------------------------------------------------------------------------------------------------------------------------------------------------------------------------------------------------------------------------|
| 2286 | 302784_length_11450_cvg_34.2_tip_1_0 | 14647 | beta- -glucan-binding protein | 3817 | 0        | 39.40% | 0.096 | no IPS match                                                                                                                                                                                                                                                                                                                                                                                                                                                                                                                                                                                                                                                                                                                                                                                                                                                                                                                                                                                                                                                                                                                                                                                                                                                                                                                                                                                                                                                                                                                                                                                                                                                                                                                                                                                                                                                                                                                                                                                                                                                                                                           |
|      |                                      |       |                               |      |          |        |       | NON_CYTOPLASMIC_DOMAIN (PHOBIUS); TRANSMEMBRANE (PHOBIUS);<br>TRANSMEMBRANE (PHOBIUS); NON_CYTOPLASMIC_DOMAIN (PHOBIUS);<br>TRANSMEMBRANE (PHOBIUS); NON_CYTOPLASMIC_DOMAIN (PHOBIUS);<br>CYTOPLASMIC_DOMAIN (PHOBIUS); NON_CYTOPLASMIC_DOMAIN<br>(PHOBIUS); TRANSMEMBRANE (PHOBIUS); TRANSMEMBRANE (PHOBIUS);<br>TRANSMEMBRANE (PHOBIUS); CYTOPLASMIC_DOMAIN (PHOBIUS);<br>CYTOPLASMIC_DOMAIN (PHOBIUS); NON_CYTOPLASMIC_DOMAIN<br>(PHOBIUS); TRANSMEMBRANE (PHOBIUS); NON_CYTOPLASMIC_DOMAIN<br>(PHOBIUS); TRANSMEMBRANE (PHOBIUS); TRANSMEMBRANE (PHOBIUS);<br>TRANSMEMBRANE (PHOBIUS); CYTOPLASMIC_DOMAIN (PHOBIUS);<br>NON_CYTOPLASMIC_DOMAIN (PHOBIUS); TRANSMEMBRANE (PHOBIUS);<br>TRANSMEMBRANE (PHOBIUS); TRANSMEMBRANE (PHOBIUS);<br>TRANSMEMBRANE (PHOBIUS); CYTOPLASMIC_DOMAIN (PHOBIUS);<br>TRANSMEMBRANE (PHOBIUS); TRANSMEMBRANE (PHOBIUS);<br>TRANSMEMBRANE (PHOBIUS); TRANSMEMBRANE (PHOBIUS);<br>CYTOPLASMIC_DOMAIN (PHOBIUS); TRANSMEMBRANE (PHOBIUS);<br>CYTOPLASMIC_DOMAIN (PHOBIUS); TRANSMEMBRANE (PHOBIUS);<br>CYTOPLASMIC_DOMAIN (PHOBIUS); TRANSMEMBRANE (PHOBIUS);<br>TRANSMEMBRANE (PHOBIUS); TRANSMEMBRANE (PHOBIUS);<br>TRANSMEMBRANE (PHOBIUS); NON_CYTOPLASMIC_DOMAIN (PHOBIUS);<br>TRANSMEMBRANE (PHOBIUS); CYTOPLASMIC_DOMAIN (PHOBIUS);<br>NON_CYTOPLASMIC_DOMAIN (PHOBIUS); NON_CYTOPLASMIC_DOMAIN<br>(PHOBIUS); CYTOPLASMIC_DOMAIN (PHOBIUS);<br>NON_CYTOPLASMIC_DOMAIN (PHOBIUS); TRANSMEMBRANE (PHOBIUS);<br>TRANSMEMBRANE (PHOBIUS); CYTOPLASMIC_DOMAIN (PHOBIUS);<br>NON_CYTOPLASMIC_DOMAIN (PHOBIUS); TRANSMEMBRANE (PHOBIUS);<br>TRANSMEMBRANE (PHOBIUS); NON_CYTOPLASMIC_DOMAIN (PHOBIUS);<br>CYTOPLASMIC_DOMAIN (PHOBIUS); TRANSMEMBRANE (PHOBIUS);<br>CYTOPLASMIC_DOMAIN (PHOBIUS); CYTOPLASMIC_DOMAIN (PHOBIUS);<br>CYTOPLASMIC_DOMAIN (PHOBIUS); TRANSMEMBRANE (PHOBIUS);<br>TRANSMEMBRANE (PHOBIUS); CYTOPLASMIC_DOMAIN (PHOBIUS);<br>CYTOPLASMIC_DOMAIN (PHOBIUS); CYTOPLASMIC_DOMAIN (PHOBIUS);<br>NON_CYTOPLASMIC_DOMAIN (PHOBIUS); NON_CYTOPLASMIC_DOMAIN<br>(PHOBIUS); NON_CYTOPLASMIC_DOMAIN (PHOBIUS);<br>CYTOPLASMIC_DOMAIN (PHOBIUS); NON_CYTOPLASMIC_DOMAIN |
| 2288 | 302790_length_15619_cvg_32.5_tip_1_2 | 16248 | mucin- partial                | 5206 | 2.27E-11 | 42.29% | 0.152 | CYTOPLASMIC_DOMAIN (PHOBIUS); TRANSMEMBRANE (PHOBIUS);<br>TRANSMEMBRANE (PHOBIUS); CYTOPLASMIC_DOMAIN (PHOBIUS);<br>CYTOPLASMIC_DOMAIN (PHOBIUS); TRANSMEMBRANE (PHOBIUS);<br>TRANSMEMBRANE (PHOBIUS); TRANSMEMBRANE (PHOBIUS);<br>TRANSMEMBRANE (PHOBIUS); NON_CYTOPLASMIC_DOMAIN (PHOBIUS);<br>TRANSMEMBRANE (PHOBIUS); CYTOPLASMIC_DOMAIN (PHOBIUS);<br>NON_CYTOPLASMIC_DOMAIN (PHOBIUS); NON_CYTOPLASMIC_DOMAIN<br>(PHOBIUS); CYTOPLASMIC_DOMAIN (PHOBIUS);<br>NON_CYTOPLASMIC_DOMAIN (PHOBIUS); TRANSMEMBRANE (PHOBIUS);<br>TRANSMEMBRANE (PHOBIUS); CYTOPLASMIC_DOMAIN (PHOBIUS);<br>NON_CYTOPLASMIC_DOMAIN (PHOBIUS); TRANSMEMBRANE (PHOBIUS);<br>TRANSMEMBRANE (PHOBIUS); NON_CYTOPLASMIC_DOMAIN (PHOBIUS);<br>CYTOPLASMIC_DOMAIN (PHOBIUS); TRANSMEMBRANE (PHOBIUS);<br>TRANSMEMBRANE (PHOBIUS); CYTOPLASMIC_DOMAIN (PHOBIUS);<br>CYTOPLASMIC_DOMAIN (PHOBIUS); CYTOPLASMIC_DOMAIN (PHOBIUS);<br>NON_CYTOPLASMIC_DOMAIN (PHOBIUS); NON_CYTOPLASMIC_DOMAIN<br>(PHOBIUS); NON_CYTOPLASMIC_DOMAIN (PHOBIUS);<br>CYTOPLASMIC_DOMAIN (PHOBIUS); NON_CYTOPLASMIC_DOMAIN                                                                                                                                                                                                                                                                                                                                                                                                                                                                                                                                                                                                                                                                                                                                                                                                                                                                                                                                                                                                                                             |



|      |                                      |       |                      |      |          |        |       |  |                                                                                                                                                                                                                                                                                                                                                                                                                                                                                                                                                                                                                                                                                                                                                                                                                                                                                                                                                                                                                                                                                                                                                                                                                                                                                                                                                                                                                                                                                                                                                                                                                                                                                                                                                                                                                                                                                                                                                                                                                                                                                                                                                                                                                                                                                                                                                                                                                                                                                                                                                                         |
|------|--------------------------------------|-------|----------------------|------|----------|--------|-------|--|-------------------------------------------------------------------------------------------------------------------------------------------------------------------------------------------------------------------------------------------------------------------------------------------------------------------------------------------------------------------------------------------------------------------------------------------------------------------------------------------------------------------------------------------------------------------------------------------------------------------------------------------------------------------------------------------------------------------------------------------------------------------------------------------------------------------------------------------------------------------------------------------------------------------------------------------------------------------------------------------------------------------------------------------------------------------------------------------------------------------------------------------------------------------------------------------------------------------------------------------------------------------------------------------------------------------------------------------------------------------------------------------------------------------------------------------------------------------------------------------------------------------------------------------------------------------------------------------------------------------------------------------------------------------------------------------------------------------------------------------------------------------------------------------------------------------------------------------------------------------------------------------------------------------------------------------------------------------------------------------------------------------------------------------------------------------------------------------------------------------------------------------------------------------------------------------------------------------------------------------------------------------------------------------------------------------------------------------------------------------------------------------------------------------------------------------------------------------------------------------------------------------------------------------------------------------------|
|      |                                      |       |                      |      |          |        |       |  | TRANSMEMBRANE (PHOBIUS); NON_CYTOPLASMIC_DOMAIN (PHOBIUS);<br>NON_CYTOPLASMIC_DOMAIN (PHOBIUS); SIGNAL_PEPTIDE_C_REGION<br>(PHOBIUS); TRANSMEMBRANE (PHOBIUS); CYTOPLASMIC_DOMAIN<br>(PHOBIUS); CYTOPLASMIC_DOMAIN (PHOBIUS); TRANSMEMBRANE<br>(PHOBIUS); NON_CYTOPLASMIC_DOMAIN (PHOBIUS);<br>NON_CYTOPLASMIC_DOMAIN (PHOBIUS); TRANSMEMBRANE (PHOBIUS);<br>TRANSMEMBRANE (PHOBIUS); SIGNAL_PEPTIDE_H_REGION (PHOBIUS);<br>CYTOPLASMIC_DOMAIN (PHOBIUS); TRANSMEMBRANE (PHOBIUS);<br>TRANSMEMBRANE (PHOBIUS); NON_CYTOPLASMIC_DOMAIN (PHOBIUS);<br>TRANSMEMBRANE (PHOBIUS); TRANSMEMBRANE (PHOBIUS);<br>TRANSMEMBRANE (PHOBIUS); NON_CYTOPLASMIC_DOMAIN (PHOBIUS);<br>TRANSMEMBRANE (PHOBIUS); CYTOPLASMIC_DOMAIN (PHOBIUS);<br>TRANSMEMBRANE (PHOBIUS); CYTOPLASMIC_DOMAIN (PHOBIUS);<br>NON_CYTOPLASMIC_DOMAIN (PHOBIUS); CYTOPLASMIC_DOMAIN<br>(PHOBIUS); NON_CYTOPLASMIC_DOMAIN (PHOBIUS); TRANSMEMBRANE<br>(PHOBIUS); TRANSMEMBRANE (PHOBIUS); TRANSMEMBRANE (PHOBIUS);<br>NON_CYTOPLASMIC_DOMAIN (PHOBIUS); TRANSMEMBRANE (PHOBIUS);<br>TRANSMEMBRANE (PHOBIUS); NON_CYTOPLASMIC_DOMAIN (PHOBIUS);<br>CYTOPLASMIC_DOMAIN (PHOBIUS); CYTOPLASMIC_DOMAIN (PHOBIUS);<br>TRANSMEMBRANE (PHOBIUS); NON_CYTOPLASMIC_DOMAIN (PHOBIUS);<br>CYTOPLASMIC_DOMAIN (PHOBIUS); TRANSMEMBRANE (PHOBIUS);<br>CYTOPLASMIC_DOMAIN (PHOBIUS); NON_CYTOPLASMIC_DOMAIN<br>(PHOBIUS); NON_CYTOPLASMIC_DOMAIN (PHOBIUS); TRANSMEMBRANE<br>(PHOBIUS); NON_CYTOPLASMIC_DOMAIN (PHOBIUS);<br>CYTOPLASMIC_DOMAIN (PHOBIUS); TRANSMEMBRANE (PHOBIUS);<br>TRANSMEMBRANE (PHOBIUS); CYTOPLASMIC_DOMAIN (PHOBIUS);<br>CYTOPLASMIC_DOMAIN (PHOBIUS); NON_CYTOPLASMIC_DOMAIN<br>(PHOBIUS); NON_CYTOPLASMIC_DOMAIN (PHOBIUS); TRANSMEMBRANE<br>(PHOBIUS); NON_CYTOPLASMIC_DOMAIN (PHOBIUS);<br>CYTOPLASMIC_DOMAIN (PHOBIUS); TRANSMEMBRANE (PHOBIUS);<br>CYTOPLASMIC_DOMAIN (PHOBIUS); NON_CYTOPLASMIC_DOMAIN<br>(PHOBIUS); TRANSMEMBRANE (PHOBIUS); TRANSMEMBRANE (PHOBIUS);<br>NON_CYTOPLASMIC_DOMAIN (PHOBIUS); CYTOPLASMIC_DOMAIN<br>(PHOBIUS); TRANSMEMBRANE (PHOBIUS); TRANSMEMBRANE (PHOBIUS);<br>CYTOPLASMIC_DOMAIN (PHOBIUS); TRANSMEMBRANE (PHOBIUS);<br>CYTOPLASMIC_DOMAIN (PHOBIUS); TRANSMEMBRANE (PHOBIUS);<br>NON_CYTOPLASMIC_DOMAIN (PHOBIUS); CYTOPLASMIC_DOMAIN<br>(PHOBIUS); NON_CYTOPLASMIC_DOMAIN (PHOBIUS); TRANSMEMBRANE<br>(PHOBIUS); NON_CYTOPLASMIC_DOMAIN (PHOBIUS); TRANSMEMBRANE<br>(PHOBIUS); TRANSMEMBRANE (PHOBIUS); TRANSMEMBRANE (PHOBIUS);<br>Coil (COILS); Coil (COILS); Coil (COILS); Coil (COILS); Coil (COILS); Coil (COILS);<br>Coil (COILS); Coil (COILS) |
| 2287 | 302790_length_15619_cvg_32.5_tip_1_0 | 16248 | coagulation factor v | 5207 | 1.93E-12 | 41.30% | 0.292 |  | NON_CYTOPLASMIC_DOMAIN (PHOBIUS); TRANSMEMBRANE (PHOBIUS);<br>TRANSMEMBRANE (PHOBIUS); NON_CYTOPLASMIC_DOMAIN (PHOBIUS);<br>CYTOPLASMIC_DOMAIN (PHOBIUS); CYTOPLASMIC_DOMAIN (PHOBIUS);<br>TRANSMEMBRANE (PHOBIUS); NON_CYTOPLASMIC_DOMAIN (PHOBIUS);<br>CYTOPLASMIC_DOMAIN (PHOBIUS); NON_CYTOPLASMIC_DOMAIN<br>(PHOBIUS); TRANSMEMBRANE (PHOBIUS); TRANSMEMBRANE (PHOBIUS);<br>CYTOPLASMIC_DOMAIN (PHOBIUS); TRANSMEMBRANE (PHOBIUS);<br>CYTOPLASMIC_DOMAIN (PHOBIUS); NON_CYTOPLASMIC_DOMAIN<br>(PHOBIUS); NON_CYTOPLASMIC_DOMAIN (PHOBIUS); TRANSMEMBRANE<br>(PHOBIUS); NON_CYTOPLASMIC_DOMAIN (PHOBIUS);<br>CYTOPLASMIC_DOMAIN (PHOBIUS); TRANSMEMBRANE (PHOBIUS);<br>CYTOPLASMIC_DOMAIN (PHOBIUS); NON_CYTOPLASMIC_DOMAIN<br>(PHOBIUS); TRANSMEMBRANE (PHOBIUS); TRANSMEMBRANE (PHOBIUS);<br>NON_CYTOPLASMIC_DOMAIN (PHOBIUS); CYTOPLASMIC_DOMAIN<br>(PHOBIUS); TRANSMEMBRANE (PHOBIUS); TRANSMEMBRANE (PHOBIUS);<br>CYTOPLASMIC_DOMAIN (PHOBIUS); NON_CYTOPLASMIC_DOMAIN<br>(PHOBIUS); TRANSMEMBRANE (PHOBIUS); TRANSMEMBRANE (PHOBIUS);<br>CYTOPLASMIC_DOMAIN (PHOBIUS); TRANSMEMBRANE (PHOBIUS);<br>NON_CYTOPLASMIC_DOMAIN (PHOBIUS); CYTOPLASMIC_DOMAIN<br>(PHOBIUS); TRANSMEMBRANE (PHOBIUS); COIL (COILS); Coil (COILS);<br>Coil (COILS); Coil (COILS); Coil (COILS); Coil (COILS); Coil (COILS);                                                                                                                                                                                                                                                                                                                                                                                                                                                                                                                                                                                                                                                                                                                                                                                                                                                                                                                                                                                                                                                                                                                                                                                                                                                           |
| 2289 | 302790_length_15619_cvg_32.5_tip_1_3 | 16248 | mucin 2              | 5207 | 7.39E-66 | 47.80% | 0.102 |  | NON_CYTOPLASMIC_DOMAIN (PHOBIUS); CYTOPLASMIC_DOMAIN<br>(PHOBIUS); NON_CYTOPLASMIC_DOMAIN (PHOBIUS); TRANSMEMBRANE<br>(PHOBIUS); NON_CYTOPLASMIC_DOMAIN (PHOBIUS); TRANSMEMBRANE<br>(PHOBIUS); TRANSMEMBRANE (PHOBIUS); TRANSMEMBRANE (PHOBIUS);<br>Coil (COILS); Coil (COILS); Coil (COILS); Coil (COILS); Coil (COILS); Coil (COILS);<br>Coil (COILS); Coil (COILS)                                                                                                                                                                                                                                                                                                                                                                                                                                                                                                                                                                                                                                                                                                                                                                                                                                                                                                                                                                                                                                                                                                                                                                                                                                                                                                                                                                                                                                                                                                                                                                                                                                                                                                                                                                                                                                                                                                                                                                                                                                                                                                                                                                                                   |

Supplementary Table 7: Whole body tissue transcriptome (Trinity contigs that match against secreted proteins [UniProtSL0243])

| Nr. | Contig name                            | Read Numbers | Blast result (evalue=10 <sup>-5</sup> , BlastP, Nr database) | Seq. length | min. evalue | mean similarity | SignalP | InterProScan                                                                                                                                                                                                                                                                                                                                                                                                                                                                                                                                                                                                                                                                                                                                                                                                       |
|-----|----------------------------------------|--------------|--------------------------------------------------------------|-------------|-------------|-----------------|---------|--------------------------------------------------------------------------------------------------------------------------------------------------------------------------------------------------------------------------------------------------------------------------------------------------------------------------------------------------------------------------------------------------------------------------------------------------------------------------------------------------------------------------------------------------------------------------------------------------------------------------------------------------------------------------------------------------------------------------------------------------------------------------------------------------------------------|
| 1   | c100101_g1_i1_len_662_path_1_0_661_1   | 16           | tolloid-like protein 2 isoform x1                            | 221         | 1.41E-75    | 64.60%          | 0.118   | IPR002172 (SMART); IPR000859 (SMART); IPR000859 (PFAM); IPR000859 (G3DSA:2.60.120.GENE3D); IPR002172 (G3DSA:4.10.400.GENE3D); G3DSA:1.20.5.900 (GENE3D); PTHR10127:SF557 (PANTHER); PTHR10127 (PANTHER); NON_CYTOPLASMIC_DOMAIN (PHOBIUS); CYTOPLASMIC_DOMAIN (PHOBIUS); TRANSMEMBRANE (PHOBIUS); IPR000859 (PROSITE_PROFILES); IPR002172 (SUPERFAMILY); IPR000859 (SUPERFAMILY); TMhelix (TMHMM)                                                                                                                                                                                                                                                                                                                                                                                                                  |
| 2   | c100109_g1_i1_len_465_path_443_0_464_0 | 11           | leucomyosuppressin precursor                                 | 155         | 6.19E-36    | 71.40%          | 0.262   | NON_CYTOPLASMIC_DOMAIN (PHOBIUS); TRANSMEMBRANE (PHOBIUS); CYTOPLASMIC_DOMAIN (PHOBIUS); TMhelix (TMHMM)                                                                                                                                                                                                                                                                                                                                                                                                                                                                                                                                                                                                                                                                                                           |
| 3   | c100138_g1_i1_len_390_path_1_0_389_0   | 10           | isoform c                                                    | 130         | 3.59E-50    | 79.90%          | 0.109   | IPR000716 (SMART); IPR019577 (PFAM); IPR000716 (PFAM); IPR000716 (G3DSA:4.10.800.GENE3D); IPR011992 (G3DSA:1.10.238.GENE3D); PTHR12036 (PANTHER); IPR000716 (PROSITE_PATTERNS); IPR000716 (PROSITE_PROFILES); IPR000716 (SUPERFAMILY)                                                                                                                                                                                                                                                                                                                                                                                                                                                                                                                                                                              |
| 4   | c100142_g1_i1_len_598_path_1_0_597_5   | 14           | cadherin-related tumor suppressor                            | 199         | 2.52E-72    | 74.40%          | 0.102   | IPR002126 (SMART); IPR002126 (G3DSA:2.60.40.GENE3D); IPR002126 (PFAM); PTHR24026 (PANTHER); PTHR24026:SF41 (PANTHER); IPR002126 (PROSITE_PROFILES); IPR015919 (SUPERFAMILY); IPR015919 (SUPERFAMILY)                                                                                                                                                                                                                                                                                                                                                                                                                                                                                                                                                                                                               |
| 5   | c100151_g1_i1_len_811_path_1_0_810_4   | 44           | ecto-nox disulfide-thiol exchanger 2                         | 270         | 1.73E-57    | 74.50%          | 0.1     | Coil (COILS); PTHR16001 (PANTHER)                                                                                                                                                                                                                                                                                                                                                                                                                                                                                                                                                                                                                                                                                                                                                                                  |
| 6   | c100167_g1_i1_len_280_path_1_0_279_5   | 7            | notch-regulated ankyrin repeat-containing protein            | 93          | 1.56E-32    | 74.40%          | 0.104   | IPR002110 (SMART); PF13857 (PFAM); IPR020683 (G3DSA:1.25.40.GENE3D); PTHR24203 (PANTHER); IPR002110 (PROSITE_PROFILES); IPR020683 (PROSITE_PROFILES); IPR020683 (SUPERFAMILY)                                                                                                                                                                                                                                                                                                                                                                                                                                                                                                                                                                                                                                      |
| 7   | c100323_g1_i1_len_255_path_1_0_254_2   | 4            | torso-like protein isoform x2                                | 85          | 3.62E-17    | 67.60%          | 0.118   | no IPS match                                                                                                                                                                                                                                                                                                                                                                                                                                                                                                                                                                                                                                                                                                                                                                                                       |
| 8   | c100372_g1_i1_len_234_path_212_0_233_3 | 2            | lactose-binding lectin I-2-like                              | 78          | 1.46E-08    | 59.10%          | 0.102   | IPR016186 (G3DSA:3.10.100.GENE3D); IPR001304 (PFAM); PTHR22802 (PANTHER); IPR001304 (PROSITE_PROFILES); IPR016187 (SUPERFAMILY)                                                                                                                                                                                                                                                                                                                                                                                                                                                                                                                                                                                                                                                                                    |
| 9   | c100512_g1_i1_len_268_path_246_0_267_0 | 4            | serine threonine-protein kinase pak 1                        | 90          | 4.64E-49    | 93.00%          | 0.096   | G3DSA:1.10.510.10 (GENE3D); IPR000719 (PFAM); PTHR24361 (PANTHER); PTHR24361:SF245 (PANTHER); IPR008271 (PROSITE_PATTERNS); IPR000719 (PROSITE_PROFILES); IPR011009 (SUPERFAMILY)                                                                                                                                                                                                                                                                                                                                                                                                                                                                                                                                                                                                                                  |
| 10  | c100542_g1_i1_len_897_path_1_0_896_0   | 28           | carbohydrate sulfotransferase 11                             | 299         | 1.54E-70    | 65.40%          | 0.142   | IPR005331 (PFAM); IPR018011 (PANTHER); PTHR12137:SF30 (PANTHER); IPR027417 (SUPERFAMILY)                                                                                                                                                                                                                                                                                                                                                                                                                                                                                                                                                                                                                                                                                                                           |
| 11  | c100584_g1_i1_len_303_path_281_0_302_3 | 6            | oocyte zinc finger protein 20                                | 101         | 4.73E-12    | 79.60%          | 0.099   | IPR015880 (SMART); IPR013087 (G3DSA:3.30.160.GENE3D); IPR013087 (G3DSA:3.30.160.GENE3D); PF13465 (PFAM); PTHR24409 (PANTHER); IPR007087 (PROSITE_PATTERNS); IPR007087 (PROSITE_PROFILES); IPR007087 (PROSITE_PROFILES); SSF57667 (SUPERFAMILY)                                                                                                                                                                                                                                                                                                                                                                                                                                                                                                                                                                     |
| 12  | c100807_g1_i1_len_324_path_1_0_323_3   | 11           | aqp_aedae ame: full=aquaporin                                | 108         | 8.34E-20    | 70.00%          | 0.21    | IPR000425 (PRINTS); IPR023271 (G3DSA:1.20.1080.GENE3D); IPR000425 (PFAM); IPR000425 (PANTHER); PTHR19139:SF45 (PANTHER); IPR022357 (PROSITE_PATTERNS); TRANSMEMBRANE (PHOBIUS); NON_CYTOPLASMIC_DOMAIN (PHOBIUS); CYTOPLASMIC_DOMAIN (PHOBIUS); CYTOPLASMIC_DOMAIN (PHOBIUS); TRANSMEMBRANE (PHOBIUS); IPR023271 (SUPERFAMILY); TMhelix (TMHMM); TMhelix (TMHMM)                                                                                                                                                                                                                                                                                                                                                                                                                                                   |
| 13  | c100993_g1_i1_len_608_path_586_0_607_0 | 13           | upf0364 protein c6orf211 homolog                             | 203         | 6.77E-57    | 64.10%          | 0.153   | IPR002791 (PFAM); PTHR12260:SF1 (PANTHER); PTHR12260 (PANTHER); IPR002791 (SUPERFAMILY)                                                                                                                                                                                                                                                                                                                                                                                                                                                                                                                                                                                                                                                                                                                            |
| 14  | c101109_g1_i1_len_1509_path_1_0_1508_2 | 64           | neuropeptides capa receptor-like                             | 503         | 3.90E-149   | 74.20%          | 0.209   | Coil (COILS); IPR000276 (PRINTS); IPR005390 (PRINTS); G3DSA:1.20.1070.10 (GENE3D); IPR000276 (PFAM); PTHR24243 (PANTHER); PTHR24243:SF107 (PANTHER); IPR000276 (PROSITE_PATTERNS); NON_CYTOPLASMIC_DOMAIN (PHOBIUS); CYTOPLASMIC_DOMAIN (PHOBIUS); CYTOPLASMIC_DOMAIN (PHOBIUS); TRANSMEMBRANE (PHOBIUS); TRANSMEMBRANE (PHOBIUS); TRANSMEMBRANE (PHOBIUS); TRANSMEMBRANE (PHOBIUS); NON_CYTOPLASMIC_DOMAIN (PHOBIUS); CYTOPLASMIC_DOMAIN (PHOBIUS); CYTOPLASMIC_DOMAIN (PHOBIUS); TRANSMEMBRANE (PHOBIUS); CYTOPLASMIC_DOMAIN (PHOBIUS); NON_CYTOPLASMIC_DOMAIN (PHOBIUS); TRANSMEMBRANE (PHOBIUS); NON_CYTOPLASMIC_DOMAIN (PHOBIUS); IPR017452 (PROSITE_PROFILES); SSF81321 (SUPERFAMILY); TMhelix (TMHMM); TMhelix (TMHMM); TMhelix (TMHMM); TMhelix (TMHMM); TMhelix (TMHMM); TMhelix (TMHMM); TMhelix (TMHMM) |
| 15  | c101175_g1_i1_len_651_path_1_0_650_0   | 18           | h aca ribonucleoprotein complex non-core subunit naf1        | 217         | 1.10E-52    | 76.90%          | 0.379Y  | G3DSA:2.40.10.230 (GENE3D); IPR007504 (PFAM); PTHR31991 (PANTHER); IPR009000 (SUPERFAMILY)                                                                                                                                                                                                                                                                                                                                                                                                                                                                                                                                                                                                                                                                                                                         |

|    |                                           |     |                                                               |     |          |        |        |                                                                                                                                                                                                                                                                                                                                                                                                                                                    |
|----|-------------------------------------------|-----|---------------------------------------------------------------|-----|----------|--------|--------|----------------------------------------------------------------------------------------------------------------------------------------------------------------------------------------------------------------------------------------------------------------------------------------------------------------------------------------------------------------------------------------------------------------------------------------------------|
| 16 | c10122_g2_i1_len_364_path_596_0_363_2     | 6   | limbic system-associated membrane protein                     | 121 | 4.24E-26 | 57.60% | 0.108  | IPR013098 (PFAM); PF13895 (PFAM); IPR013783 (G3DSA:2.60.40.GENE3D); IPR013783 (G3DSA:2.60.40.GENE3D); PTHR19831 (PANTHER); PTHR19831:SF40 (PANTHER); IPR007110 (PROSITE_PROFILES); SSF48726 (SUPERFAMILY); SSF48726 (SUPERFAMILY)                                                                                                                                                                                                                  |
| 17 | c101367_g1_i1_len_905_path_1_0_904_2      | 292 | flowering locus t                                             | 301 | 6.11E-24 | 58.30% | 0.189  | IPR008914 (G3DSA:3.90.280.GENE3D); IPR008914 (PFAM); PTHR11362 (PANTHER); IPR001858 (PROSITE_PATTERNS); CYTOPLASMIC_DOMAIN (PHOBIUS); NON_CYTOPLASMIC_DOMAIN (PHOBIUS); TRANSMEMBRANE (PHOBIUS); IPR008914 (SUPERFAMILY)                                                                                                                                                                                                                           |
| 18 | c101418_g1_i1_len_958_path_936_0_957_1    | 63  | reticulocalbin-2                                              | 319 | 1.11E-97 | 70.20% | 0.410Y | IPR002048 (SMART); IPR011992 (PFAM); IPR002048 (PFAM); IPR011992 (G3DSA:1.10.238.GENE3D); IPR011992 (G3DSA:1.10.238.GENE3D); PTHR10827:SF48 (PANTHER); PTHR10827 (PANTHER); IPR018247 (PROSITE_PATTERNS); IPR018247 (PROSITE_PATTERNS); IPR018247 (PROSITE_PATTERNS); IPR018247 (PROSITE_PATTERNS); IPR002048 (PROSITE_PROFILES); IPR002048 (PROSITE_PROFILES); IPR002048 (PROSITE_PROFILES); IPR002048 (PROSITE_PROFILES); SSF47473 (SUPERFAMILY) |
| 19 | c101553_g1_i1_len_677_path_655_0_676_2    | 16  | transient receptor potential channel pyrexia-like             | 225 | 1.79E-26 | 49.60% | 0.168  | IPR002110 (SMART); IPR020683 (PFAM); IPR020683 (G3DSA:1.25.40.GENE3D); PTHR24188 (PANTHER); TRANSMEMBRANE (PHOBIUS); CYTOPLASMIC_DOMAIN (PHOBIUS); NON_CYTOPLASMIC_DOMAIN (PHOBIUS); IPR020683 (PROSITE_PROFILES); IPR002110 (PROSITE_PROFILES); IPR002110 (PROSITE_PROFILES); IPR020683 (SUPERFAMILY)                                                                                                                                             |
| 20 | c101573_g1_i1_len_495_path_473_0_494_0    | 6   | scp-like extracellular domain containing protein 1            | 165 | 2.37E-23 | 53.70% | 0.117  | IPR001283 (PRINTS); IPR014044 (SMART); IPR014044 (PFAM); IPR014044 (G3DSA:3.40.33.GENE3D); IPR001283 (PANTHER); IPR014044 (SUPERFAMILY)                                                                                                                                                                                                                                                                                                            |
| 21 | c10163_g1_i1_len_340_path_576_0_339_3     | 6   | low quality protein: contactin-like                           | 114 | 1.77E-27 | 61.20% | 0.212  | IPR003961 (SMART); IPR003961 (PFAM); IPR013783 (G3DSA:2.60.40.GENE3D); PTHR10489 (PANTHER); IPR003961 (PROSITE_PROFILES); IPR003961 (SUPERFAMILY)                                                                                                                                                                                                                                                                                                  |
| 22 | c101875_g1_i1_len_341_path_1_0_340_2      | 4   | kielin chordin-like protein                                   | 113 | 1.04E-18 | 54.50% | 0.152  | IPR013320 (SUPERFAMILY)                                                                                                                                                                                                                                                                                                                                                                                                                            |
| 23 | c101907_g1_i1_len_1228_path_1206_0_1227_0 | 22  | aael001549- partial                                           | 410 | 0        | 95.10% | 0.14   | IPR000961 (SMART); IPR002290 (SMART); G3DSA:3.30.200.20 (GENE3D); G3DSA:1.10.510.10 (GENE3D); IPR000719 (PFAM); IPR017892 (PFAM); PTHR24357 (PANTHER); PTHR24357:SF80 (PANTHER); IPR008271 (PROSITE_PATTERNS); NON_CYTOPLASMIC_DOMAIN (PHOBIUS); TRANSMEMBRANE (PHOBIUS); CYTOPLASMIC_DOMAIN (PHOBIUS); IPR000961 (PROSITE_PROFILES); IPR000719 (PROSITE_PROFILES); IPR011009 (SUPERFAMILY)                                                        |
| 24 | c101978_g1_i1_len_685_path_663_0_684_0    | 20  | succinate-semialdehyde mitochondrial                          | 229 | 6.25E-89 | 79.70% | 0.131  | IPR016162 (G3DSA:3.40.605.GENE3D); IPR015590 (PFAM); PTHR11699:SF49 (PANTHER); PTHR11699 (PANTHER); IPR016161 (SUPERFAMILY)                                                                                                                                                                                                                                                                                                                        |
| 25 | c101985_g1_i1_len_405_path_1_0_404_0      | 8   | mam and ldl-receptor class a domain-containing protein 2-like | 135 | 1.02E-07 | 43.50% | 0.099  | IPR000998 (PFAM); PTHR23282 (PANTHER); PTHR23282:SF75 (PANTHER); IPR013320 (SUPERFAMILY)                                                                                                                                                                                                                                                                                                                                                           |
| 26 | c102102_g1_i1_len_431_path_409_0_430_5    | 7   | domain and thioredoxin-containing                             | 143 | 7.65E-49 | 70.00% | 0.111  | PR00421 (PRINTS); IPR013766 (PFAM); IPR012336 (G3DSA:3.40.30.GENE3D); PTHR24078 (PANTHER); PTHR24078:SF3 (PANTHER); IPR017937 (PROSITE_PATTERNS); IPR012336 (PROSITE_PROFILES); IPR012336 (SUPERFAMILY)                                                                                                                                                                                                                                            |
| 27 | c102112_g1_i1_len_663_path_1_0_662_2      | 26  | enoyl- delta isomerase mitochondrial-like                     | 221 | 6.95E-58 | 68.00% | 0.164  | Coil (COILS); IPR000582 (PRINTS); IPR001753 (PFAM); IPR000582 (PFAM); IPR029045 (G3DSA:3.90.226.GENE3D); IPR014352 (G3DSA:1.20.80.GENE3D); PTHR23310 (PANTHER); PTHR23310:SF55 (PANTHER); IPR022408 (PROSITE_PATTERNS); IPR000582 (PROSITE_PROFILES); IPR000582 (SUPERFAMILY); IPR029045 (SUPERFAMILY)                                                                                                                                             |
| 28 | c102211_g1_i1_len_657_path_635_0_656_4    | 9   | leucine-rich repeat-containing protein 15                     | 219 | 1.05E-44 | 61.90% | 0.11   | PR00019 (PRINTS); IPR003591 (SMART); SM00364 (SMART); G3DSA:3.80.10.10 (GENE3D); IPR001611 (PFAM); IPR001611 (PFAM); PTHR24365 (PANTHER); IPR001611 (PROSITE_PROFILES); IPR001611 (PROSITE_PROFILES); IPR001611 (PROSITE_PROFILES); IPR001611 (PROSITE_PROFILES); IPR001611 (PROSITE_PROFILES); SSF52058 (SUPERFAMILY)                                                                                                                             |
| 29 | c102279_g1_i1_len_248_path_1_0_247_1      | 4   | collagen alpha chain                                          | 83  | 6.52E-17 | 71.10% | 0.11   | IPR008160 (PFAM); PTHR24023 (PANTHER); PTHR24023:SF444 (PANTHER)                                                                                                                                                                                                                                                                                                                                                                                   |
| 30 | c102279_g1_i1_len_248_path_1_0_247_5      | 4   | collagen-like protein                                         | 82  | 2.49E-09 | 50.70% | 0.102  | no IPS match                                                                                                                                                                                                                                                                                                                                                                                                                                       |

|    |                                                                |    |                                                          |     |          |        |        |                                                                                                                                                                                                                                                                                                                                                                                                                                                                                                                                                                  |
|----|----------------------------------------------------------------|----|----------------------------------------------------------|-----|----------|--------|--------|------------------------------------------------------------------------------------------------------------------------------------------------------------------------------------------------------------------------------------------------------------------------------------------------------------------------------------------------------------------------------------------------------------------------------------------------------------------------------------------------------------------------------------------------------------------|
| 31 | c102282_g1_i1_len_927_path_1_0_926_3                           | 33 | tumor necrosis factor receptor superfamily member 16     | 309 | 3.85E-53 | 50.50% | 0.107  | IPR001368 (SMART); IPR000488 (SMART); IPR000488 (PFAM); G3DSA:2.10.50.10 (GENE3D); IPR001368 (PFAM); G3DSA:2.10.50.10 (GENE3D); IPR011029 (G3DSA:1.10.533.GENE3D); PTHR23097 (PANTHER); PTHR23097:SF106 (PANTHER); IPR001368 (PROSITE_PATTERNS); IPR001368 (PROSITE_PATTERNS); TRANSMEMBRANE (PHOBIUS); NON_CYTOPLASMIC_DOMAIN (PHOBIUS); CYTOPLASMIC_DOMAIN (PHOBIUS); IPR001368 (PROSITE_PROFILES); IPR000488 (PROSITE_PROFILES); IPR001368 (PROSITE_PROFILES); SSF57586 (SUPERFAMILY); IPR011029 (SUPERFAMILY); TMhelix (TMHMM)                               |
| 32 | c102344_g1_i1_len_324_path_1_0_323_4                           | 8  | mam and ldl-receptor class a domain-containing protein 1 | 108 | 2.18E-20 | 62.30% | 0.405Y | IPR002172 (G3DSA:4.10.400.GENE3D); IPR000998 (PFAM); IPR002172 (PFAM); PTHR23282 (PANTHER); IPR000998 (PROSITE_PROFILES); IPR002172 (PROSITE_PROFILES); IPR002172 (SUPERFAMILY); IPR013320 (SUPERFAMILY)                                                                                                                                                                                                                                                                                                                                                         |
| 33 | c102364_g1_i1_len_533_path_1_0_532_2                           | 14 | bcl-6 corepressor                                        | 177 | 3.57E-50 | 69.10% | 0.147  | IPR002110 (PRINTS); IPR002110 (SMART); IPR020683 (PFAM); IPR020683 (G3DSA:1.25.40.GENE3D); PTHR24117 (PANTHER); IPR002110 (PROSITE_PROFILES); IPR020683 (PROSITE_PROFILES); IPR002110 (PROSITE_PROFILES); IPR020683 (SUPERFAMILY)                                                                                                                                                                                                                                                                                                                                |
| 34 | c102593_g1_i1_len_364_path_342_0_363_3                         | 14 | zinc finger protein 569-like isoform x3                  | 122 | 6.46E-24 | 59.60% | 0.1    | IPR015880 (SMART); IPR013087 (G3DSA:3.30.160.GENE3D); IPR013087 (G3DSA:3.30.160.GENE3D); PF13465 (PFAM); IPR013087 (G3DSA:3.30.160.GENE3D); PTHR24409 (PANTHER); IPR007087 (PROSITE_PATTERNS); IPR007087 (PROSITE_PATTERNS); IPR007087 (PROSITE_PATTERNS); IPR007087 (PROSITE_PROFILES); IPR007087 (PROSITE_PROFILES); SSF57667 (SUPERFAMILY); SSF57667 (SUPERFAMILY)                                                                                                                                                                                            |
| 35 | c102640_g1_i1_len_536_path_1_0_535_1                           | 13 | thromboxane a synthase-like protein                      | 179 | 4.02E-51 | 66.60% | 0.12   | IPR001128 (PRINTS); IPR002401 (PRINTS); IPR001128 (G3DSA:1.10.630.GENE3D); IPR001128 (PFAM); PTHR24292:SF24 (PANTHER); PTHR24292 (PANTHER); IPR001128 (SUPERFAMILY)                                                                                                                                                                                                                                                                                                                                                                                              |
| 36 | c102644_g1_i1_len_308_path_1_0_307_1                           | 4  | dorsal-ventral patterning protein sog isoform x2         | 103 | 4.59E-15 | 63.60% | 0.148  | PTHR11339 (PANTHER); PTHR11339:SF223 (PANTHER); IPR010895 (PROSITE_PROFILES); IPR010895 (PROSITE_PROFILES)                                                                                                                                                                                                                                                                                                                                                                                                                                                       |
| 37 | c102685_g1_i1_len_641_path_619_0_640_5                         | 10 | laminin subunit alpha                                    | 213 | 2.50E-68 | 66.20% | 0.141  | no IPS match                                                                                                                                                                                                                                                                                                                                                                                                                                                                                                                                                     |
| 38 | c102689_g1_i1_len_813_path_1_0_812_1                           | 46 | calbindin-32 isoform x2                                  | 271 | 2.43E-97 | 95.20% | 0.106  | IPR002048 (SMART); IPR011992 (G3DSA:1.10.238.GENE3D); IPR011992 (PFAM); IPR011992 (G3DSA:1.10.238.GENE3D); PTHR19972 (PANTHER); IPR018247 (PROSITE_PATTERNS); IPR018247 (PROSITE_PATTERNS); IPR018247 (PROSITE_PATTERNS); IPR018247 (PROSITE_PATTERNS); IPR002048 (PROSITE_PROFILES); IPR002048 (PROSITE_PROFILES); IPR002048 (PROSITE_PROFILES); IPR002048 (PROSITE_PROFILES); SSF47473 (SUPERFAMILY)                                                                                                                                                           |
| 39 | c102837_g1_i1_len_509_path_1_0_508_1                           | 21 | reelin-like isoform x4                                   | 170 | 4.31E-58 | 66.10% | 0.114  | PTHR11841 (PANTHER)                                                                                                                                                                                                                                                                                                                                                                                                                                                                                                                                              |
| 40 | c10284_g1_i1_len_1091_path_1_0_249_251_250_273_2174_274_1090_3 | 21 | gastrula zinc finger                                     | 364 | 5.63E-15 | 63.30% | 0.107  | IPR015880 (SMART); IPR013087 (G3DSA:3.30.160.GENE3D); IPR013087 (G3DSA:3.30.160.GENE3D); PF13465 (PFAM); PTHR24409 (PANTHER); PTHR24409:SF14 (PANTHER); IPR007087 (PROSITE_PATTERNS); IPR007087 (PROSITE_PATTERNS); IPR007087 (PROSITE_PATTERNS); IPR007087 (PROSITE_PROFILES); IPR007087 (PROSITE_PROFILES); IPR007087 (PROSITE_PROFILES); SSF57667 (SUPERFAMILY); SSF57667 (SUPERFAMILY)                                                                                                                                                                       |
| 41 | c102901_g1_i1_len_293_path_271_0_292_4                         | 10 | furin-like protease isoforms 1 1-x 2-like                | 98  | 5.46E-50 | 92.30% | 0.288  | IPR000209 (G3DSA:3.40.50.GENE3D); IPR000209 (PFAM); IPR015500 (PANTHER); PTHR10795:SF71 (PANTHER); IPR023828 (PROSITE_PATTERNS); IPR000209 (SUPERFAMILY)                                                                                                                                                                                                                                                                                                                                                                                                         |
| 42 | c103281_g1_i1_len_574_path_1_0_573_3                           | 14 | zinc finger protein ozf-like                             | 192 | 1.02E-32 | 56.30% | 0.099  | IPR015880 (SMART); IPR007087 (PFAM); IPR013087 (G3DSA:3.30.160.GENE3D); PF13465 (PFAM); IPR013087 (G3DSA:3.30.160.GENE3D); IPR013087 (G3DSA:3.30.160.GENE3D); IPR013087 (G3DSA:3.30.160.GENE3D); PTHR24409 (PANTHER); PTHR24409:SF14 (PANTHER); IPR007087 (PROSITE_PATTERNS); IPR007087 (PROSITE_PATTERNS); IPR007087 (PROSITE_PATTERNS); IPR007087 (PROSITE_PROFILES); IPR007087 (PROSITE_PROFILES); IPR007087 (PROSITE_PROFILES); IPR007087 (PROSITE_PROFILES); SSF57667 (SUPERFAMILY); SSF57667 (SUPERFAMILY); SSF57667 (SUPERFAMILY); SSF57667 (SUPERFAMILY) |

|    |                                        |    |                                                                                                                                                                           |     |          |        |        |                                                                                                                                                                                                                                                                                                                                                                                                                 |
|----|----------------------------------------|----|---------------------------------------------------------------------------------------------------------------------------------------------------------------------------|-----|----------|--------|--------|-----------------------------------------------------------------------------------------------------------------------------------------------------------------------------------------------------------------------------------------------------------------------------------------------------------------------------------------------------------------------------------------------------------------|
| 43 | c103473_g1_i1_len_339_path_1_0_338_3   | 4  | GH18519                                                                                                                                                                   | 113 | 5.38E-32 | 73.50% | 0.145  | PR00019 (PRINTS); IPR003591 (SMART); G3DSA:3.80.10.10 (GENE3D); IPR001611 (PFAM); IPR001611 (PFAM); PTHR24365 (PANTHER); IPR001611 (PROSITE_PROFILES); IPR001611 (PROSITE_PROFILES); IPR001611 (PROSITE_PROFILES); IPR001611 (PROSITE_PROFILES); SSF52058 (SUPERFAMILY)                                                                                                                                         |
| 44 | c103517_g1_i1_len_768_path_1_0_767_2   | 23 | protein lin-7 homolog b                                                                                                                                                   | 256 | 1.36E-60 | 96.00% | 0.098  | IPR001478 (SMART); IPR001478 (G3DSA:2.30.42.GENE3D); IPR001478 (PFAM); PTHR14063 (PANTHER); TRANSMEMBRANE (PHOBIUS); NON_CYTOPLASMIC_DOMAIN (PHOBIUS); TRANSMEMBRANE (PHOBIUS); CYTOPLASMIC_DOMAIN (PHOBIUS); TRANSMEMBRANE (PHOBIUS); NON_CYTOPLASMIC_DOMAIN (PHOBIUS); CYTOPLASMIC_DOMAIN (PHOBIUS); IPR001478 (PROSITE_PROFILES); IPR001478 (SUPERFAMILY); TMhelix (TMHMM); TMhelix (TMHMM); TMhelix (TMHMM) |
| 45 | c103519_g1_i1_len_340_path_1_0_339_3   | 8  | transferrin                                                                                                                                                               | 114 | 2.97E-22 | 62.50% | 0.1    | IPR001156 (PRINTS); G3DSA:3.40.190.10 (GENE3D); IPR001156 (PFAM); G3DSA:3.40.190.10 (GENE3D); PTHR11485:SF18 (PANTHER); PTHR11485 (PANTHER); IPR001156 (PROSITE_PROFILES); SSF53850 (SUPERFAMILY)                                                                                                                                                                                                               |
| 46 | c103717_g1_i1_len_342_path_320_0_341_4 | 9  | proclotting enzyme                                                                                                                                                        | 114 | 2.84E-47 | 77.50% | 0.147  | IPR001254 (SMART); G3DSA:2.40.10.10 (GENE3D); G3DSA:2.40.10.10 (GENE3D); IPR001254 (PFAM); PTHR24268 (PANTHER); IPR018114 (PROSITE_PATTERNS); IPR001254 (PROSITE_PROFILES); IPR009003 (SUPERFAMILY)                                                                                                                                                                                                             |
| 47 | c103859_g1_i1_len_298_path_276_0_297_1 | 3  | zinc finger protein 235                                                                                                                                                   | 99  | 8.82E-18 | 59.40% | 0.115  | IPR015880 (SMART); IPR013087 (G3DSA:3.30.160.GENE3D); IPR013087 (G3DSA:3.30.160.GENE3D); PF13465 (PFAM); PTHR24409 (PANTHER); IPR007087 (PROSITE_PATTERNS); IPR007087 (PROSITE_PATTERNS); IPR007087 (PROSITE_PROFILES); IPR007087 (PROSITE_PROFILES); IPR007087 (PROSITE_PROFILES); SSF57667 (SUPERFAMILY); SSF57667 (SUPERFAMILY)                                                                              |
| 48 | c103866_g1_i1_len_619_path_1_0_618_0   | 15 | leucine-rich repeat-containing protein 70 isoform x1                                                                                                                      | 207 | 8.92E-22 | 54.50% | 0.115  | IPR003591 (SMART); G3DSA:3.80.10.10 (GENE3D); G3DSA:3.80.10.10 (GENE3D); IPR001611 (PFAM); PTHR24367 (PANTHER); IPR001611 (PROSITE_PROFILES); IPR001611 (PROSITE_PROFILES); IPR001611 (PROSITE_PROFILES); IPR001611 (PROSITE_PROFILES); SSF52058 (SUPERFAMILY)                                                                                                                                                  |
| 49 | c103881_g1_i1_len_481_path_459_0_480_1 | 15 | dnaj homolog subfamily c member 25 homolog                                                                                                                                | 160 | 8.98E-68 | 82.50% | 0.105  | Coil (COILS); Coil (COILS); IPR001623 (PRINTS); IPR001623 (SMART); IPR001623 (PFAM); IPR001623 (G3DSA:1.10.287.GENE3D); PTHR24078:SF125 (PANTHER); PTHR24078 (PANTHER); IPR018253 (PROSITE_PATTERNS); TRANSMEMBRANE (PHOBIUS); CYTOPLASMIC_DOMAIN (PHOBIUS); NON_CYTOPLASMIC_DOMAIN (PHOBIUS); IPR001623 (PROSITE_PROFILES); IPR001623 (SUPERFAMILY); TMhelix (TMHMM)                                           |
| 50 | c103918_g1_i1_len_399_path_1_0_398_0   | 11 | btd_takru ame: full=biotinidase short=biotinase flags: precursor                                                                                                          | 133 | 1.36E-13 | 56.70% | 0.113  | IPR003010 (G3DSA:3.60.110.GENE3D); IPR003010 (PFAM); IPR012101 (PANTHER); IPR003010 (PROSITE_PROFILES); IPR003010 (SUPERFAMILY)                                                                                                                                                                                                                                                                                 |
| 51 | c104026_g1_i1_len_336_path_1_0_335_3   | 8  | chemosensory protein 1 partial                                                                                                                                            | 112 | 1.86E-38 | 79.20% | 0.829Y | IPR005055 (G3DSA:1.10.2080.GENE3D); IPR005055 (PFAM); IPR005055 (PANTHER); PTHR11257:SF4 (PANTHER); SIGNAL_PEPTIDE_C_REGION (PHOBIUS); SIGNAL_PEPTIDE_H_REGION (PHOBIUS); SIGNAL_PEPTIDE_N_REGION (PHOBIUS); NON_CYTOPLASMIC_DOMAIN (PHOBIUS); SIGNAL_PEPTIDE (PHOBIUS); SignalP-noTM (SIGNALP_EUK); IPR005055 (SUPERFAMILY); TMhelix (TMHMM)                                                                   |
| 52 | c104120_g1_i1_len_404_path_382_0_403_1 | 6  | glucosylceramidase- partial                                                                                                                                               | 135 | 1.58E-52 | 72.40% | 0.1    | IPR001139 (PRINTS); IPR013781 (G3DSA:3.20.20.GENE3D); IPR001139 (PFAM); PTHR11069:SF7 (PANTHER); IPR001139 (PANTHER); IPR017853 (SUPERFAMILY)                                                                                                                                                                                                                                                                   |
| 53 | c104363_g1_i1_len_344_path_1_0_343_2   | 4  | vascular endothelial growth factor receptor partial                                                                                                                       | 114 | 2.08E-19 | 57.70% | 0.115  | IPR013783 (G3DSA:2.60.40.GENE3D); PTHR15360 (PANTHER); SSF48726 (SUPERFAMILY)                                                                                                                                                                                                                                                                                                                                   |
| 54 | c104536_g1_i1_len_560_path_4_0_559_3   | 12 | zinc finger protein 271 (zinc finger protein 7) (zinc finger protein znfphe133) (epstein-barr virus-induced zinc finger protein) (znf-eb) (ct-zfp48) (zinc finger protein | 187 | 2.02E-24 | 60.90% | 0.112  | IPR015880 (SMART); PF13894 (PFAM); IPR013087 (G3DSA:3.30.160.GENE3D); PF13465 (PFAM); IPR013087 (G3DSA:3.30.160.GENE3D); PTHR24409 (PANTHER); IPR007087 (PROSITE_PATTERNS); IPR007087 (PROSITE_PATTERNS); IPR007087 (PROSITE_PATTERNS); IPR007087 (PROSITE_PATTERNS); IPR007087 (PROSITE_PROFILES); IPR007087 (PROSITE_PROFILES); IPR007087 (PROSITE_PROFILES); SSF57667 (SUPERFAMILY); SSF57667 (SUPERFAMILY)  |
| 55 | c104577_g1_i1_len_308_path_1_0_307_1   | 5  | protein kinase c-binding protein partial                                                                                                                                  | 103 | 1.78E-30 | 72.70% | 0.11   | Coil (COILS); PTHR24042:SF4 (PANTHER); PTHR24042 (PANTHER)                                                                                                                                                                                                                                                                                                                                                      |
| 56 | c104636_g1_i1_len_619_path_597_0_618_0 | 22 | third variable lymphocyte receptor                                                                                                                                        | 207 | 3.29E-11 | 51.60% | 0.125  | IPR001611 (PFAM); G3DSA:3.80.10.10 (GENE3D); PTHR24365:SF241 (PANTHER); PTHR24365 (PANTHER); SSF52058 (SUPERFAMILY)                                                                                                                                                                                                                                                                                             |



|    |                                                                                |    |                                                               |     |           |        |        |                                                                                                                                                                                                                                                                                                                                                                                                                                                                                                                                                              |
|----|--------------------------------------------------------------------------------|----|---------------------------------------------------------------|-----|-----------|--------|--------|--------------------------------------------------------------------------------------------------------------------------------------------------------------------------------------------------------------------------------------------------------------------------------------------------------------------------------------------------------------------------------------------------------------------------------------------------------------------------------------------------------------------------------------------------------------|
| 57 | c104743_g1_i1_len_612_path_590_0_611_2                                         | 25 | zinc finger protein 628 isoform x1                            | 204 | 6.51E-16  | 56.10% | 0.106  | Coil (COILS); IPR015880 (SMART); PF13465 (PFAM); IPR013087 (G3DSA:3.30.160.GENE3D); IPR013087 (G3DSA:3.30.160.GENE3D); PTHR24409:SF14 (PANTHER); PTHR24409 (PANTHER); IPR007087 (PROSITE_PATTERNS); IPR007087 (PROSITE_PATTERNS); IPR007087 (PROSITE_PROFILES); IPR007087 (PROSITE_PROFILES); IPR007087 (PROSITE_PROFILES); SSF57667 (SUPERFAMILY); SSF57667 (SUPERFAMILY); IPR001680 (SMART); IPR001680 (PFAM); IPR015943 (G3DSA:2.130.10.GENE3D); PTHR19863 (PANTHER); IPR017986 (PROSITE_PROFILES); IPR001680 (PROSITE_PROFILES); IPR017986 (SUPERFAMILY) |
| 58 | c104990_g1_i1_len_363_path_341_0_362_0                                         | 7  | wd repeat-containing protein 47 isoform x5                    | 121 | 6.42E-75  | 94.30% | 0.13   | IPR000719 (PFAM); G3DSA:3.30.200.20 (GENE3D); G3DSA:1.10.510.10 (GENE3D); PTHR24361:SF201 (PANTHER); PTHR24361 (PANTHER); TRANSMEMBRANE (PHOBIUS); NON_CYTOPLASMIC_DOMAIN (PHOBIUS); CYTOPLASMIC_DOMAIN (PHOBIUS); IPR000719 (PROSITE_PROFILES); IPR011009 (SUPERFAMILY)                                                                                                                                                                                                                                                                                     |
| 59 | c105120_g1_i1_len_347_path_1_0_346_5                                           | 7  | serine threonine-protein kinase osr1 isoform x1               | 115 | 1.05E-67  | 94.60% | 0.199  | IPR001283 (PRINTS); IPR002413 (PRINTS); IPR014044 (SMART); IPR014044 (G3DSA:3.40.33.GENE3D); IPR014044 (PFAM); IPR001283 (PANTHER); CYTOPLASMIC_DOMAIN (PHOBIUS); TRANSMEMBRANE (PHOBIUS); NON_CYTOPLASMIC_DOMAIN (PHOBIUS); IPR014044 (SUPERFAMILY); TMhelix (TMHMM)                                                                                                                                                                                                                                                                                        |
| 60 | c105183_g1_i1_len_948_path_907_0_884_17_92_885_905_1792_906_926_1792_927_947_0 | 49 | ves g 5 allergen                                              | 316 | 7.46E-49  | 53.00% | 0.382Y | IPR015880 (SMART); IPR007087 (PFAM); IPR013087 (G3DSA:3.30.160.GENE3D); PF13465 (PFAM); IPR013087 (G3DSA:3.30.160.GENE3D); PTHR24409 (PANTHER); PTHR24409:SF14 (PANTHER); IPR007087 (PROSITE_PATTERNS); IPR007087 (PROSITE_PATTERNS); IPR007087 (PROSITE_PATTERNS); IPR007087 (PROSITE_PROFILES); IPR007087 (PROSITE_PROFILES); IPR007087 (PROSITE_PROFILES); SSF57667 (SUPERFAMILY); SSF57667 (SUPERFAMILY)                                                                                                                                                 |
| 62 | c10534_g1_i1_len_346_path_324_0_345_1                                          | 1  | zinc finger protein 709-like                                  | 115 | 1.57E-21  | 63.20% | 0.109  | IPR015880 (SMART); IPR007087 (PFAM); IPR013087 (G3DSA:3.30.160.GENE3D); IPR013087 (G3DSA:3.30.160.GENE3D); PF13894 (PFAM); PF13912 (PFAM); IPR013087 (G3DSA:3.30.160.GENE3D); PF13465 (PFAM); PTHR24409 (PANTHER); PTHR24409:SF13 (PANTHER); IPR007087 (PROSITE_PATTERNS); IPR007087 (PROSITE_PATTERNS); IPR007087 (PROSITE_PATTERNS); IPR007087 (PROSITE_PROFILES); IPR007087 (PROSITE_PROFILES); IPR007087 (PROSITE_PROFILES); IPR007087 (PROSITE_PROFILES); SSF57667 (SUPERFAMILY); SSF57667 (SUPERFAMILY)                                                |
| 63 | c10534_g2_i1_len_499_path_1123_0_498_2                                         | 6  | zinc finger protein 850-like isoform x1                       | 166 | 1.11E-23  | 55.10% | 0.116  | IPR015880 (SMART); IPR007087 (PFAM); IPR013087 (G3DSA:3.30.160.GENE3D); IPR013087 (G3DSA:3.30.160.GENE3D); PF13894 (PFAM); PF13912 (PFAM); IPR013087 (G3DSA:3.30.160.GENE3D); PF13465 (PFAM); PTHR24409 (PANTHER); PTHR24409:SF13 (PANTHER); IPR007087 (PROSITE_PATTERNS); IPR007087 (PROSITE_PATTERNS); IPR007087 (PROSITE_PATTERNS); IPR007087 (PROSITE_PROFILES); IPR007087 (PROSITE_PROFILES); IPR007087 (PROSITE_PROFILES); IPR007087 (PROSITE_PROFILES); SSF57667 (SUPERFAMILY); SSF57667 (SUPERFAMILY)                                                |
| 61 | c105340_g1_i1_len_407_path_1_0_406_1                                           | 6  | upf0454 protein c12orf49 homolog                              | 136 | 6.78E-34  | 87.60% | 0.132  | IPR019352 (PFAM); IPR019352 (PANTHER)                                                                                                                                                                                                                                                                                                                                                                                                                                                                                                                        |
| 64 | c105558_g1_i1_len_279_path_1_0_278_4                                           | 4  | mam and ldl-receptor class a domain-containing protein 2-like | 93  | 1.96E-10  | 52.90% | 0.103  | IPR000998 (PFAM); PTHR23282:SF75 (PANTHER); PTHR23282 (PANTHER); IPR000998 (PROSITE_PROFILES); IPR013320 (SUPERFAMILY)                                                                                                                                                                                                                                                                                                                                                                                                                                       |
| 65 | c105706_g1_i1_len_327_path_305_0_326_5                                         | 4  | metallophosphoesterase domain-containing protein 1            | 109 | 5.53E-57  | 92.20% | 0.134  | IPR004843 (PFAM); IPR029052 (G3DSA:3.60.21.GENE3D); PTHR12905 (PANTHER); IPR029052 (SUPERFAMILY)                                                                                                                                                                                                                                                                                                                                                                                                                                                             |
| 66 | c105858_g1_i1_len_413_path_1_0_412_1                                           | 7  | non-structural protein ns5                                    | 138 | 5.38E-07  | 52.43% | 0.101  | IPR029063 (G3DSA:3.40.50.GENE3D)                                                                                                                                                                                                                                                                                                                                                                                                                                                                                                                             |
| 67 | c105886_g1_i1_len_317_path_295_0_316_2                                         | 6  | cysteine-rich motor neuron 1 protein                          | 105 | 9.73E-26  | 59.40% | 0.11   | G3DSA:2.10.70.10 (GENE3D); SSF57603 (SUPERFAMILY)                                                                                                                                                                                                                                                                                                                                                                                                                                                                                                            |
| 68 | c10607_g1_i1_len_240_path_218_0_239_2                                          | 3  | protein fam20c                                                | 80  | 1.01E-44  | 90.70% | 0.131  | IPR009581 (PFAM); PTHR12450:SF8 (PANTHER); IPR024869 (PANTHER)                                                                                                                                                                                                                                                                                                                                                                                                                                                                                               |
| 69 | c10607_g2_i1_len_179_path_435_0_178_4                                          | 2  | extracellular serine threonine protein kinase fam20c-like     | 60  | 5.64E-26  | 94.20% | 0.098  | IPR029207 (PFAM); IPR024869 (PANTHER); PTHR12450:SF8 (PANTHER)                                                                                                                                                                                                                                                                                                                                                                                                                                                                                               |
| 70 | c106203_g1_i1_len_378_path_356_0_377_2                                         | 6  | cyclophilin a                                                 | 126 | 7.74E-64  | 91.90% | 0.205  | IPR002130 (PRINTS); IPR002130 (PFAM); IPR024936 (PIRSF); IPR029000 (G3DSA:2.40.100.GENE3D); IPR024936 (PANTHER); IPR020892 (PROSITE_PATTERNS); IPR002130 (PROSITE_PROFILES); IPR029000 (SUPERFAMILY)                                                                                                                                                                                                                                                                                                                                                         |
| 71 | c106240_g1_i1_len_655_path_1_0_654_5                                           | 19 | ryanodine receptor 44f                                        | 218 | 4.07E-102 | 83.20% | 0.105  | IPR003032 (PFAM); IPR003877 (PFAM); IPR015925 (PANTHER); PTHR13715:SF74 (PANTHER); IPR001870 (PROSITE_PROFILES); IPR013320 (SUPERFAMILY)                                                                                                                                                                                                                                                                                                                                                                                                                     |
| 72 | c106268_g1_i1_len_465_path_1_0_464_1                                           | 14 | chymotrypsin 1                                                | 155 | 1.34E-14  | 60.20% | 0.203  | G3DSA:2.40.10.10 (GENE3D); G3DSA:2.40.10.10 (GENE3D); IPR001254 (PFAM); PTHR24276 (PANTHER); IPR018114 (PROSITE_PATTERNS); IPR001254 (PROSITE_PROFILES); IPR009003 (SUPERFAMILY)                                                                                                                                                                                                                                                                                                                                                                             |
| 73 | c106414_g1_i1_len_626_path_604_0_625_3                                         | 10 | receptor-type tyrosine-protein phosphatase kappa              | 209 | 1.96E-120 | 89.90% | 0.103  | IPR000242 (SMART); IPR029021 (G3DSA:3.90.190.GENE3D); IPR000242 (PFAM); PTHR19134:SF227 (PANTHER); PTHR19134 (PANTHER); IPR000242 (PROSITE_PROFILES); IPR029021 (SUPERFAMILY)                                                                                                                                                                                                                                                                                                                                                                                |
| 74 | c106462_g1_i1_len_421_path_1_0_420_4                                           | 5  | glutaminy-peptide cyclotransferase-like isoform x2            | 140 | 4.79E-16  | 58.50% | 0.192  | G3DSA:3.40.630.10 (GENE3D); PTHR12283 (PANTHER); CYTOPLASMIC_DOMAIN (PHOBIUS); TRANSMEMBRANE (PHOBIUS); NON_CYTOPLASMIC_DOMAIN (PHOBIUS); SSF53187 (SUPERFAMILY); TMhelix (TMHMM); TMhelix (TMHMM)                                                                                                                                                                                                                                                                                                                                                           |

|    |                                        |    |                                                                      |     |           |        |         |                                                                                                                                                                                                                                                                                                                                                                                                                                                                                                   |
|----|----------------------------------------|----|----------------------------------------------------------------------|-----|-----------|--------|---------|---------------------------------------------------------------------------------------------------------------------------------------------------------------------------------------------------------------------------------------------------------------------------------------------------------------------------------------------------------------------------------------------------------------------------------------------------------------------------------------------------|
| 75 | c10675_g1_i1_len_632_path_610_0_631_2  | 25 | cytochrome p450 3a31                                                 | 210 | 9.34E-51  | 70.00% | 0.151   | IPR002401 (PRINTS); IPR001128 (PRINTS); IPR001128 (PFAM); IPR001128 (G3DSA:1.10.630.GENE3D); PTHR24292:SF24 (PANTHER); PTHR24292 (PANTHER); IPR001128 (SUPERFAMILY)                                                                                                                                                                                                                                                                                                                               |
| 76 | c106831_g1_i1_len_472_path_450_0_471_0 | 8  | lipoprotein receptor                                                 | 158 | 1.34E-21  | 54.00% | 0.113   | IPR000203 (SMART); IPR000203 (PFAM); PTHR12011:SF260 (PANTHER); PTHR12011 (PANTHER); IPR000203 (PROSITE_PROFILES)                                                                                                                                                                                                                                                                                                                                                                                 |
| 77 | c107555_g1_i1_len_203_path_1_0_202_0   | 0  | carboxypeptidase b-like                                              | 68  | 6.90E-18  | 69.30% | 0.343Y  | IPR000834 (PFAM); G3DSA:3.40.630.10 (GENE3D); PTHR11705 (PANTHER); SSF53187 (SUPERFAMILY)                                                                                                                                                                                                                                                                                                                                                                                                         |
| 78 | c107967_g1_i1_len_278_path_256_0_277_5 | 4  | basement membrane-specific heparan sulfate proteoglycan core protein | 92  | 5.21E-35  | 78.70% | 0.118   | IPR002172 (PRINTS); IPR002172 (SMART); IPR002172 (G3DSA:4.10.400.GENE3D); IPR002172 (PFAM); PTHR10529 (PANTHER); IPR023415 (PROSITE_PATTERNS); IPR023415 (PROSITE_PATTERNS); IPR002172 (PROSITE_PROFILES); IPR002172 (PROSITE_PROFILES); IPR002172 (SUPERFAMILY); IPR002172 (SUPERFAMILY)                                                                                                                                                                                                         |
| 79 | c108345_g1_i1_len_370_path_1_0_369_1   | 5  | lipoprotein receptor                                                 | 123 | 4.94E-08  | 42.33% | 0.118   | IPR002172 (G3DSA:4.10.400.GENE3D); IPR002172 (PROSITE_PROFILES); IPR002172 (SUPERFAMILY); IPR002172 (SUPERFAMILY)                                                                                                                                                                                                                                                                                                                                                                                 |
| 80 | c10860_g1_i1_len_771_path_749_0_770_1  | 53 | zinc finger protein 234-like isoform x2                              | 257 | 2.23E-31  | 54.60% | 0.101   | IPR015880 (SMART); IPR013087 (G3DSA:3.30.160.GENE3D); PF13465 (PFAM); IPR013087 (G3DSA:3.30.160.GENE3D); PTHR24409:SF13 (PANTHER); PTHR24409 (PANTHER); IPR007087 (PROSITE_PATTERNS); IPR007087 (PROSITE_PATTERNS); IPR007087 (PROSITE_PROFILES); IPR007087 (PROSITE_PROFILES); IPR007087 (PROSITE_PROFILES); SSF57667 (SUPERFAMILY); SSF57667 (SUPERFAMILY); SSF57667 (SUPERFAMILY)                                                                                                              |
| 81 | c108721_g1_i1_len_290_path_268_0_289_0 | 4  | neural-cadherin isoform x10                                          | 97  | 3.48E-43  | 83.40% | 0.101   | IPR013320 (G3DSA:2.60.120.GENE3D); IPR001791 (PFAM); PTHR24027 (PANTHER); PTHR24027:SF285 (PANTHER); IPR013032 (PROSITE_PATTERNS); IPR013320 (SUPERFAMILY)                                                                                                                                                                                                                                                                                                                                        |
| 82 | c108786_g1_i1_len_258_path_1_0_257_4   | 4  | thiol peroxiredoxin                                                  | 86  | 1.87E-44  | 97.60% | 0.101   | IPR012336 (G3DSA:3.40.30.GENE3D); G3DSA:3.30.1020.10 (GENE3D); IPR019479 (PFAM); PTHR10681:SF67 (PANTHER); PTHR10681 (PANTHER); IPR012336 (SUPERFAMILY)                                                                                                                                                                                                                                                                                                                                           |
| 83 | c108852_g1_i1_len_694_path_1_0_693_4   | 17 | protein fam3c-like                                                   | 231 | 5.92E-59  | 62.70% | 0.455 Y | PTHR14592:SF7 (PANTHER); IPR026101 (PANTHER); SignalP-noTM (SIGNALP_EUK)                                                                                                                                                                                                                                                                                                                                                                                                                          |
| 84 | c108888_g1_i1_len_458_path_436_0_457_0 | 7  | folliculin-related protein 5-like                                    | 153 | 1.06E-83  | 86.20% | 0.103   | IPR013783 (G3DSA:2.60.40.GENE3D); IPR011992 (G3DSA:1.10.238.GENE3D); IPR013098 (PFAM); IPR011992 (PFAM); PTHR10913:SF14 (PANTHER); PTHR10913 (PANTHER); IPR018247 (PROSITE_PATTERNS); IPR018247 (PROSITE_PATTERNS); IPR002048 (PROSITE_PROFILES); IPR002048 (PROSITE_PROFILES); SSF48726 (SUPERFAMILY); SSF47473 (SUPERFAMILY)                                                                                                                                                                    |
| 85 | c10894_g1_i1_len_915_path_1_0_914_5    | 56 | estradiol 17-beta-dehydrogenase 12                                   | 305 | 8.87E-56  | 67.40% | 0.097   | IPR002347 (PRINTS); IPR002198 (PRINTS); IPR002198 (PFAM); IPR016040 (G3DSA:3.40.50.GENE3D); PTHR24316:SF68 (PANTHER); PTHR24316 (PANTHER); CYTOPLASMIC_DOMAIN (PHOBIUS); TRANSMEMBRANE (PHOBIUS); CYTOPLASMIC_DOMAIN (PHOBIUS); NON_CYTOPLASMIC_DOMAIN (PHOBIUS); TRANSMEMBRANE (PHOBIUS); SSF51735 (SUPERFAMILY); TMhelix (TMHMM); TMhelix (TMHMM)                                                                                                                                               |
| 86 | c108980_g1_i1_len_422_path_1_0_421_1   | 6  | protein turtle-like isoform x1                                       | 141 | 1.11E-20  | 54.80% | 0.1     | IPR003599 (SMART); IPR003598 (SMART); IPR013783 (G3DSA:2.60.40.GENE3D); IPR013098 (PFAM); PTHR10489 (PANTHER); IPR007110 (PROSITE_PROFILES); SSF48726 (SUPERFAMILY)                                                                                                                                                                                                                                                                                                                               |
| 87 | c109017_g1_i1_len_679_path_657_0_678_2 | 10 | epithelial chloride channel                                          | 226 | 1.84E-68  | 60.80% | 0.821 Y | IPR013642 (PFAM); PTHR10579 (PANTHER); PTHR10579:SF8 (PANTHER); SIGNAL_PEPTIDE_H_REGION (PHOBIUS); SIGNAL_PEPTIDE_C_REGION (PHOBIUS); NON_CYTOPLASMIC_DOMAIN (PHOBIUS); SIGNAL_PEPTIDE (PHOBIUS); SIGNAL_PEPTIDE_N_REGION (PHOBIUS); SignalP-noTM (SIGNALP_EUK)                                                                                                                                                                                                                                   |
| 88 | c109030_g1_i1_len_797_path_775_0_796_1 | 16 | zinc finger protein 57-like                                          | 266 | 3.98E-115 | 76.50% | 0.102   | IPR015880 (SMART); PF13894 (PFAM); IPR013087 (G3DSA:3.30.160.GENE3D); PF13465 (PFAM); IPR013087 (G3DSA:3.30.160.GENE3D); IPR013087 (G3DSA:3.30.160.GENE3D); PTHR24409 (PANTHER); IPR007087 (PROSITE_PATTERNS); IPR007087 (PROSITE_PATTERNS); IPR007087 (PROSITE_PROFILES); IPR007087 (PROSITE_PROFILES); IPR007087 (PROSITE_PROFILES); IPR007087 (PROSITE_PROFILES); IPR007087 (PROSITE_PROFILES); SSF57667 (SUPERFAMILY); SSF57667 (SUPERFAMILY); SSF57667 (SUPERFAMILY); SSF57667 (SUPERFAMILY) |
| 89 | c109113_g1_i1_len_267_path_1_0_266_5   | 7  | aldehyde mitochondrial precursor                                     | 89  | 9.55E-40  | 86.00% | 0.1     | IPR016163 (G3DSA:3.40.309.GENE3D); IPR015590 (PFAM); PTHR11699 (PANTHER); IPR015657 (PTHR11699:PANTHER); IPR016161 (SUPERFAMILY)                                                                                                                                                                                                                                                                                                                                                                  |

|     |                                                              |    |                                                                 |     |          |        |         |                                                                                                                                                                                                                                                                                                                                                                                                                                                                                               |
|-----|--------------------------------------------------------------|----|-----------------------------------------------------------------|-----|----------|--------|---------|-----------------------------------------------------------------------------------------------------------------------------------------------------------------------------------------------------------------------------------------------------------------------------------------------------------------------------------------------------------------------------------------------------------------------------------------------------------------------------------------------|
| 90  | c109136_g1_i1_len_347_path_1_0_346_4                         | 8  | zinc finger protein 37-like                                     | 116 | 5.24E-19 | 58.40% | 0.102   | IPR015880 (SMART); PF13465 (PFAM); IPR013087 (G3DSA:3.30.160.GENE3D); PF13894 (PFAM); IPR007087 (PFAM); IPR013087 (G3DSA:3.30.160.GENE3D); IPR013087 (G3DSA:3.30.160.GENE3D); PTHR24409:SF14 (PANTHER); PTHR24409 (PANTHER); IPR007087 (PROSITE_PATTERNS); IPR007087 (PROSITE_PATTERNS); IPR007087 (PROSITE_PATTERNS); IPR007087 (PROSITE_PROFILES); IPR007087 (PROSITE_PROFILES); IPR007087 (PROSITE_PROFILES); IPR007087 (PROSITE_PROFILES); SSF57667 (SUPERFAMILY); SSF57667 (SUPERFAMILY) |
| 91  | c109170_g1_i1_len_142_path_1_0_141_3                         | 1  | peptidylglycine alpha-hydroxylating monooxygenase               | 48  | 6.90E-14 | 76.90% | 0.119   | IPR014784 (G3DSA:2.60.120.GENE3D); PF03712 (PFAM); PTHR10680 (PANTHER); IPR008977 (SUPERFAMILY)                                                                                                                                                                                                                                                                                                                                                                                               |
| 92  | c109283_g1_i1_len_365_path_343_0_364_5                       | 6  | mam receptor domain-containing partial                          | 121 | 5.10E-24 | 56.90% | 0.107   | IPR000998 (PFAM); G3DSA:4.10.1220.10 (GENE3D); PTHR23282:SF75 (PANTHER); PTHR23282 (PANTHER); IPR000998 (PROSITE_PROFILES); IPR013320 (SUPERFAMILY)                                                                                                                                                                                                                                                                                                                                           |
| 93  | c10953_g1_i1_len_643_path_1_0_642_4                          | 24 | reelin- partial                                                 | 214 | 6.75E-54 | 57.90% | 0.255   | PTHR11841 (PANTHER)                                                                                                                                                                                                                                                                                                                                                                                                                                                                           |
| 94  | c10953_g2_i1_len_1143_path_1241_0_1142_5                     | 44 | reelin-like isoform x1                                          | 381 | 3.32E-82 | 54.10% | 0.132   | G3DSA:2.10.25.10 (GENE3D); PTHR11841 (PANTHER); IPR013032 (PROSITE_PATTERNS); IPR013032 (PROSITE_PATTERNS)                                                                                                                                                                                                                                                                                                                                                                                    |
| 95  | c109571_g1_i1_len_253_path_1_0_252_1                         | 4  | ---NA---                                                        | 84  |          |        | 0.481 Y | CYTOPLASMIC_DOMAIN (PHOBIUS); TRANSMEMBRANE (PHOBIUS); NON_CYTOPLASMIC_DOMAIN (PHOBIUS); TMhelix (TMHMM)                                                                                                                                                                                                                                                                                                                                                                                      |
| 96  | c10972_g2_i1_len_457_path_435_0_456_1                        | 11 | hemacentin- partial                                             | 152 | 7.08E-17 | 51.60% | 0.107   | IPR013783 (G3DSA:2.60.40.GENE3D); PF13895 (PFAM); IPR013783 (G3DSA:2.60.40.GENE3D); PTHR23279 (PANTHER); IPR007110 (PROSITE_PROFILES); SSF48726 (SUPERFAMILY); SSF48726 (SUPERFAMILY)                                                                                                                                                                                                                                                                                                         |
| 97  | c109790_g1_i1_len_221_path_199_0_220_5                       | 1  | histone-lysine n-methyltransferase prdm9-like                   | 73  | 3.80E-15 | 62.20% | 0.108   | IPR015880 (SMART); PF13894 (PFAM); IPR013087 (G3DSA:3.30.160.GENE3D); IPR013087 (G3DSA:3.30.160.GENE3D); PF13465 (PFAM); PTHR24409:SF14 (PANTHER); PTHR24409 (PANTHER); IPR007087 (PROSITE_PATTERNS); IPR007087 (PROSITE_PATTERNS); IPR007087 (PROSITE_PATTERNS); IPR007087 (PROSITE_PROFILES); IPR007087 (PROSITE_PROFILES); SSF57667 (SUPERFAMILY); SSF57667 (SUPERFAMILY)                                                                                                                  |
| 98  | c110322_g1_i1_len_336_path_314_0_335_3                       | 4  | latrophilin and seven transmembrane domain-containing protein 1 | 112 | 4.12E-08 | 55.60% | 0.287   | IPR00832 (PFAM); PTHR12011 (PANTHER); PTHR12011:SF61 (PANTHER); TRANSMEMBRANE (PHOBIUS); TRANSMEMBRANE (PHOBIUS); CYTOPLASMIC_DOMAIN (PHOBIUS); CYTOPLASMIC_DOMAIN (PHOBIUS); NON_CYTOPLASMIC_DOMAIN (PHOBIUS); IPR017981 (PROSITE_PROFILES); TMhelix (TMHMM); TMhelix (TMHMM)                                                                                                                                                                                                                |
| 99  | c110452_g1_i1_len_476_path_267_0_55_323_56_265_323_266_475_0 | 2  | repetitive proline-rich cell wall protein 2-like isoform x2     | 159 | 7.74E-19 | 53.70% | 0.143   | no IPS match                                                                                                                                                                                                                                                                                                                                                                                                                                                                                  |
| 100 | c11060_g2_i1_len_637_path_1383_0_636_4                       | 19 | homeotic protein spalt-major-like                               | 212 | 5.58E-97 | 88.40% | 0.108   | Coil (COILS); IPR015880 (SMART); IPR013087 (G3DSA:3.30.160.GENE3D); IPR013087 (G3DSA:3.30.160.GENE3D); PF13465 (PFAM); IPR013087 (G3DSA:3.30.160.GENE3D); PF13894 (PFAM); PTHR23233:SF49 (PANTHER); PTHR23233 (PANTHER); IPR007087 (PROSITE_PATTERNS); IPR007087 (PROSITE_PATTERNS); IPR007087 (PROSITE_PATTERNS); IPR007087 (PROSITE_PROFILES); IPR007087 (PROSITE_PROFILES); IPR007087 (PROSITE_PROFILES); SSF57667 (SUPERFAMILY); SSF57667 (SUPERFAMILY)                                   |
| 101 | c110796_g1_i1_len_292_path_1_0_291_4                         | 4  | tetratricopeptide-like helical domain-containing protein        | 97  | 1.57E-16 | 74.50% | 0.157   | IPR002130 (PRINTS); IPR002130 (PFAM); IPR029000 (G3DSA:2.40.100.GENE3D); IPR024936 (PANTHER); IPR002130 (PROSITE_PROFILES); IPR029000 (SUPERFAMILY)                                                                                                                                                                                                                                                                                                                                           |
| 102 | c11088_g1_i1_len_445_path_1_0_444_1                          | 6  | endothelin-converting enzyme 1-like                             | 148 | 5.86E-47 | 60.10% | 0.106   | IPR008753 (PFAM); G3DSA:1.10.1380.10 (GENE3D); IPR000718 (PANTHER); PTHR11733:SF124 (PANTHER); SSF55486 (SUPERFAMILY)                                                                                                                                                                                                                                                                                                                                                                         |
| 103 | c111081_g1_i1_len_477_path_455_0_476_1                       | 7  | down syndrome cell adhesion molecule-like protein dscam2        | 159 | 1.97E-81 | 89.60% | 0.108   | IPR003599 (SMART); IPR003598 (SMART); IPR013783 (G3DSA:2.60.40.GENE3D); IPR013783 (G3DSA:2.60.40.GENE3D); IPR013098 (PFAM); PTHR10489 (PANTHER); PTHR10489:SF567 (PANTHER); IPR007110 (PROSITE_PROFILES); IPR007110 (PROSITE_PROFILES); SSF48726 (SUPERFAMILY); SSF48726 (SUPERFAMILY)                                                                                                                                                                                                        |
| 104 | c111275_g1_i1_len_332_path_1_0_331_4                         | 4  | cul o 2 allergen                                                | 111 | 6.56E-21 | 58.40% | 0.105   | IPR018155 (PFAM); IPR013785 (G3DSA:3.20.20.GENE3D); IPR018155 (PANTHER); PTHR11769:SF8 (PANTHER); IPR017853 (SUPERFAMILY)                                                                                                                                                                                                                                                                                                                                                                     |
| 105 | c111295_g1_i1_len_267_path_245_0_266_3                       | 5  | zinc finger protein 431 isoform x2                              | 89  | 1.23E-18 | 67.20% | 0.109   | IPR015880 (SMART); PF13465 (PFAM); IPR013087 (G3DSA:3.30.160.GENE3D); IPR013087 (G3DSA:3.30.160.GENE3D); PTHR24409 (PANTHER); IPR007087 (PROSITE_PATTERNS); IPR007087 (PROSITE_PATTERNS); IPR007087 (PROSITE_PATTERNS); IPR007087 (PROSITE_PROFILES); IPR007087 (PROSITE_PROFILES); SSF57667 (SUPERFAMILY); SSF57667 (SUPERFAMILY)                                                                                                                                                            |

|     |                                        |    |                                                       |     |           |        |       |                                                                                                                                                                                                                                                                                                                                                                                                                                                                                                                                               |
|-----|----------------------------------------|----|-------------------------------------------------------|-----|-----------|--------|-------|-----------------------------------------------------------------------------------------------------------------------------------------------------------------------------------------------------------------------------------------------------------------------------------------------------------------------------------------------------------------------------------------------------------------------------------------------------------------------------------------------------------------------------------------------|
| 106 | c111625_g1_i1_len_385_path_1_0_384_3   | 8  | zinc finger partial                                   | 129 | 9.95E-20  | 56.20% | 0.101 | IPR015880 (SMART); IPR013087 (G3DSA:3.30.160.GENE3D); IPR013087 (G3DSA:3.30.160.GENE3D); IPR007087 (PFAM); PF13465 (PFAM); PTHR24409 (PANTHER); PTHR24409:SF14 (PANTHER); IPR007087 (PROSITE_PATTERNS); IPR007087 (PROSITE_PATTERNS); IPR007087 (PROSITE_PATTERNS); IPR007087 (PROSITE_PROFILES); IPR007087 (PROSITE_PROFILES); IPR007087 (PROSITE_PROFILES); IPR007087 (PROSITE_PROFILES); SSF57667 (SUPERFAMILY); SSF57667 (SUPERFAMILY)                                                                                                    |
| 107 | c11163_g2_i1_len_486_path_1042_0_485_3 | 12 | leucine-rich repeat-containing protein 15-like        | 162 | 8.65E-39  | 65.70% | 0.1   | PR00019 (PRINTS); IPR003591 (SMART); SM00365 (SMART); IPR001611 (PFAM); PF13516 (PFAM); IPR001611 (PFAM); G3DSA:3.80.10.10 (GENE3D); PTHR24365 (PANTHER); IPR001611 (PROSITE_PROFILES); IPR001611 (PROSITE_PROFILES); IPR001611 (PROSITE_PROFILES); IPR001611 (PROSITE_PROFILES); SSF52058 (SUPERFAMILY)                                                                                                                                                                                                                                      |
| 108 | c111716_g1_i1_len_523_path_501_0_522_4 | 8  | probable isocitrate dehydrogenase                     | 174 | 1.57E-103 | 93.40% | 0.102 | IPR024084 (PFAM); IPR024084 (G3DSA:3.40.718.GENE3D); PTHR11835:SF34 (PANTHER); IPR001804 (PANTHER); SSF53659 (SUPERFAMILY)                                                                                                                                                                                                                                                                                                                                                                                                                    |
| 109 | c112031_g1_i1_len_316_path_26_0_315_3  | 7  | pr domain zinc finger protein 1 isoform x2            | 106 | 1.61E-20  | 65.20% | 0.099 | IPR015880 (SMART); PF13465 (PFAM); IPR013087 (G3DSA:3.30.160.GENE3D); IPR007087 (PFAM); PTHR24409 (PANTHER); IPR007087 (PROSITE_PATTERNS); IPR007087 (PROSITE_PATTERNS); IPR007087 (PROSITE_PATTERNS); IPR007087 (PROSITE_PROFILES); IPR007087 (PROSITE_PROFILES); IPR007087 (PROSITE_PROFILES); IPR007087 (PROSITE_PROFILES); SSF57667 (SUPERFAMILY); SSF57667 (SUPERFAMILY)                                                                                                                                                                 |
| 110 | c112136_g1_i1_len_341_path_1_0_340_1   | 7  | transcription factor e4f1-like                        | 114 | 1.10E-30  | 68.00% | 0.107 | IPR015880 (SMART); IPR013087 (G3DSA:3.30.160.GENE3D); IPR013087 (G3DSA:3.30.160.GENE3D); PF13894 (PFAM); PF13912 (PFAM); PF13465 (PFAM); IPR007087 (PFAM); IPR013087 (G3DSA:3.30.160.GENE3D); IPR013087 (G3DSA:3.30.160.GENE3D); PTHR24409 (PANTHER); IPR007087 (PROSITE_PATTERNS); IPR007087 (PROSITE_PATTERNS); IPR007087 (PROSITE_PATTERNS); IPR007087 (PROSITE_PROFILES); IPR007087 (PROSITE_PROFILES); IPR007087 (PROSITE_PROFILES); IPR007087 (PROSITE_PROFILES); SSF57667 (SUPERFAMILY); SSF57667 (SUPERFAMILY)                        |
| 111 | c112223_g1_i1_len_158_path_1_0_157_1   | 1  | paralytic                                             | 53  | 2.09E-23  | 98.30% | 0.288 | Coil (COILS); IPR005821 (PFAM); IPR028814 (PTHR10037:PANTHER); PTHR10037 (PANTHER); CYTOPLASMIC_DOMAIN (PHOBIUS); TRANSMEMBRANE (PHOBIUS); NON_CYTOPLASMIC_DOMAIN (PHOBIUS); TMhelix (TMHMM)                                                                                                                                                                                                                                                                                                                                                  |
| 112 | c112669_g1_i1_len_283_path_261_0_282_3 | 13 | krueppel-like factor 13                               | 95  | 7.12E-46  | 85.20% | 0.113 | IPR015880 (SMART); IPR013087 (G3DSA:3.30.160.GENE3D); IPR013087 (G3DSA:3.30.160.GENE3D); PF13465 (PFAM); PTHR23223 (PANTHER); IPR007087 (PROSITE_PATTERNS); IPR007087 (PROSITE_PATTERNS); IPR007087 (PROSITE_PROFILES); IPR007087 (PROSITE_PROFILES); IPR007087 (PROSITE_PROFILES); SSF57667 (SUPERFAMILY)                                                                                                                                                                                                                                    |
| 113 | c112937_g1_i1_len_259_path_1_0_258_2   | 4  | fibrillin- partial                                    | 86  | 3.72E-32  | 81.50% | 0.141 | IPR017878 (G3DSA:3.90.290.GENE3D); IPR017878 (PFAM); IPR011398 (PANTHER); IPR017878 (PROSITE_PROFILES); IPR017878 (SUPERFAMILY)                                                                                                                                                                                                                                                                                                                                                                                                               |
| 114 | c113217_g1_i1_len_363_path_1_0_362_3   | 4  | chaperone protein                                     | 121 | 4.91E-34  | 81.40% | 0.118 | Coil (COILS); IPR029047 (G3DSA:2.60.34.GENE3D); IPR013126 (PFAM); PTHR19375 (PANTHER); IPR029047 (SUPERFAMILY)                                                                                                                                                                                                                                                                                                                                                                                                                                |
| 115 | c113327_g1_i1_len_195_path_1_0_194_1   | 3  | ferritin hch                                          | 65  | 3.51E-30  | 87.30% | 0.104 | IPR008331 (PFAM); IPR012347 (G3DSA:1.20.1260.GENE3D); IPR001519 (PANTHER); PTHR11431:SF29 (PANTHER); IPR009040 (PROSITE_PROFILES); IPR009078 (SUPERFAMILY)                                                                                                                                                                                                                                                                                                                                                                                    |
| 116 | c113929_g1_i1_len_518_path_1_0_517_0   | 9  | prolow-density lipoprotein receptor-related protein 1 | 173 | 2.73E-52  | 65.80% | 0.114 | IPR002172 (PRINTS); IPR002172 (SMART); IPR002172 (G3DSA:4.10.400.GENE3D); G3DSA:4.10.1220.10 (GENE3D); IPR002172 (PFAM); IPR002172 (G3DSA:4.10.400.GENE3D); IPR002172 (G3DSA:4.10.400.GENE3D); PTHR10529 (PANTHER); IPR023415 (PROSITE_PATTERNS); IPR023415 (PROSITE_PATTERNS); IPR023415 (PROSITE_PATTERNS); IPR023415 (PROSITE_PATTERNS); IPR002172 (PROSITE_PROFILES); IPR002172 (PROSITE_PROFILES); IPR002172 (PROSITE_PROFILES); IPR002172 (PROSITE_PROFILES); IPR002172 (SUPERFAMILY); IPR002172 (SUPERFAMILY); IPR002172 (SUPERFAMILY) |
| 117 | c114135_g1_i1_len_302_path_1_0_301_0   | 4  | laminin subunit alpha-2- partial                      | 101 | 4.75E-36  | 73.80% | 0.112 | IPR013320 (G3DSA:2.60.120.GENE3D); IPR001791 (PFAM); PTHR10574 (PANTHER); PTHR10574:SF148 (PANTHER); IPR001791 (PROSITE_PROFILES); IPR013320 (SUPERFAMILY)                                                                                                                                                                                                                                                                                                                                                                                    |
| 118 | c114170_g1_i1_len_268_path_1_0_267_2   | 3  | partial                                               | 89  | 4.21E-55  | 99.70% | 0.119 | IPR003959 (PFAM); IPR027417 (G3DSA:3.40.50.GENE3D); PTHR23078 (PANTHER); IPR027417 (SUPERFAMILY)                                                                                                                                                                                                                                                                                                                                                                                                                                              |

|     |                                                                      |     |                                                          |     |          |        |       |                                                                                                                                                                                                                                                                                                                                                                                                                                                                                                                                                              |
|-----|----------------------------------------------------------------------|-----|----------------------------------------------------------|-----|----------|--------|-------|--------------------------------------------------------------------------------------------------------------------------------------------------------------------------------------------------------------------------------------------------------------------------------------------------------------------------------------------------------------------------------------------------------------------------------------------------------------------------------------------------------------------------------------------------------------|
| 119 | c114694_g1_i1_len_366_path_344_0_365_2                               | 6   | peroxisomal multifunctional enzyme type 2-like           | 122 | 3.57E-63 | 91.40% | 0.099 | IPR002347 (PRINTS); IPR002198 (PRINTS); IPR016040 (G3DSA:3.40.50.GENE3D); IPR002198 (PFAM); PTHR24316:SF2 (PANTHER); PTHR24316 (PANTHER); IPR020904 (PROSITE_PATTERNS); SSF51735 (SUPERFAMILY)                                                                                                                                                                                                                                                                                                                                                               |
| 120 | c11473_g1_i1_len_325_path_303_0_324_1                                | 8   | serine protease nudel                                    | 108 | 9.65E-59 | 90.10% | 0.113 | IPR001254 (SMART); IPR001254 (PFAM); G3DSA:2.40.10.10 (GENE3D); PTHR24256 (PANTHER); IPR018114 (PROSITE_PATTERNS); IPR001254 (PROSITE_PROFILES); IPR009003 (SUPERFAMILY)                                                                                                                                                                                                                                                                                                                                                                                     |
| 121 | c114781_g1_i1_len_351_path_329_0_350_0                               | 6   | perlucin-like protein                                    | 117 | 1.69E-11 | 50.90% | 0.117 | IPR001304 (PFAM); IPR016186 (G3DSA:3.10.100.GENE3D); PTHR22802:SF219 (PANTHER); PTHR22802 (PANTHER); IPR001304 (PROSITE_PROFILES); IPR016187 (SUPERFAMILY)                                                                                                                                                                                                                                                                                                                                                                                                   |
| 122 | c114810_g1_i1_len_287_path_1_0_286_0                                 | 4   | vascular endothelial growth factor receptor 1 isoform x4 | 96  | 1.55E-34 | 84.00% | 0.128 | IPR001245 (PFAM); G3DSA:3.30.200.20 (GENE3D); PTHR24416 (PANTHER); PTHR24416:SF298 (PANTHER); IPR001824 (PROSITE_PATTERNS); IPR000719 (PROSITE_PROFILES); IPR011009 (SUPERFAMILY)                                                                                                                                                                                                                                                                                                                                                                            |
| 123 | c114822_g1_i1_len_259_path_237_0_258_2                               | 4   | female neotenic-specific protein 3                       | 86  | 8.44E-08 | 59.33% | 0.106 | no IPS match                                                                                                                                                                                                                                                                                                                                                                                                                                                                                                                                                 |
| 124 | c11513_g1_i1_len_1990_path_2066_0_1223_3289_1224_1248_50_1249_1989_1 | 263 | tyrosine--trna cytoplasmic                               | 663 | 0        | 80.30% | 0.134 | IPR002307 (PRINTS); IPR002305 (PFAM); G3DSA:1.10.240.10 (GENE3D); IPR002307 (TIGRFAM); IPR002547 (PFAM); IPR012340 (G3DSA:2.40.50.GENE3D); IPR014729 (G3DSA:3.40.50.GENE3D); PTHR11946 (PANTHER); IPR002547 (PROSITE_PROFILES); SSF52374 (SUPERFAMILY); IPR010987 (SUPERFAMILY); IPR012340 (SUPERFAMILY)                                                                                                                                                                                                                                                     |
| 125 | c115373_g1_i1_len_259_path_1_0_258_1                                 | 4   | enolase                                                  | 86  | 6.04E-32 | 80.80% | 0.136 | IPR020810 (PFAM); IPR029065 (G3DSA:3.20.20.GENE3D); IPR000941 (PANTHER); IPR029065 (SUPERFAMILY)                                                                                                                                                                                                                                                                                                                                                                                                                                                             |
| 126 | c115399_g1_i1_len_315_path_293_0_314_2                               | 5   | para sodium channel                                      | 105 | 1.68E-51 | 90.10% | 0.263 | IPR001696 (PRINTS); IPR005821 (PFAM); IPR028814 (PTHR10037:PANTHER); PTHR10037 (PANTHER); CYTOPLASMIC_DOMAIN (PHOBIUS); TRANSMEMBRANE (PHOBIUS); NON_CYTOPLASMIC_DOMAIN (PHOBIUS); TMhelix (TMHMM)                                                                                                                                                                                                                                                                                                                                                           |
| 127 | c11588_g1_i1_len_780_path_239_0_779_3                                | 22  | xanthine dehydrogenase                                   | 260 | 1.43E-96 | 71.30% | 0.128 | IPR002888 (PFAM); IPR012675 (G3DSA:3.10.20.GENE3D); IPR016167 (G3DSA:3.30.43.GENE3D); IPR002888 (G3DSA:1.10.150.GENE3D); IPR002346 (PFAM); PTHR11908:SF32 (PANTHER); PTHR11908 (PANTHER); IPR016166 (SUPERFAMILY); IPR001041 (SUPERFAMILY); IPR002888 (SUPERFAMILY)                                                                                                                                                                                                                                                                                          |
| 128 | c116953_g1_i1_len_364_path_1_0_363_3                                 | 6   | protein toll                                             | 122 | 6.02E-30 | 63.30% | 0.113 | G3DSA:3.80.10.10 (GENE3D); IPR001611 (PFAM); PTHR24369 (PANTHER); IPR001611 (PROSITE_PROFILES); IPR001611 (PROSITE_PROFILES); IPR001611 (PROSITE_PROFILES); SSF52058 (SUPERFAMILY)                                                                                                                                                                                                                                                                                                                                                                           |
| 129 | c117073_g1_i1_len_345_path_1_0_344_1                                 | 4   | trehalase 1                                              | 115 | 9.79E-52 | 82.00% | 0.124 | IPR001661 (PFAM); IPR001661 (PANTHER); PTHR23403:SF1 (PANTHER); IPR008928 (SUPERFAMILY)                                                                                                                                                                                                                                                                                                                                                                                                                                                                      |
| 130 | c11767_g2_i1_len_336_path_314_0_335_3                                | 4   | down syndrome cell adhesion                              | 112 | 8.86E-57 | 90.40% | 0.119 | IPR003961 (PFAM); IPR013783 (G3DSA:2.60.40.GENE3D); IPR013783 (G3DSA:2.60.40.GENE3D); PTHR10489 (PANTHER); PTHR10489:SF567 (PANTHER); IPR003961 (PROSITE_PROFILES); IPR003961 (PROSITE_PROFILES); IPR003961 (SUPERFAMILY)                                                                                                                                                                                                                                                                                                                                    |
| 131 | c118792_g1_i1_len_257_path_1_0_256_1                                 | 4   | serine threonine-protein kinase nim1                     | 86  | 3.79E-33 | 81.20% | 0.103 | IPR000719 (PFAM); G3DSA:1.10.510.10 (GENE3D); PTHR24343 (PANTHER); PTHR24343:SF106 (PANTHER); IPR008271 (PROSITE_PATTERNS); IPR000719 (PROSITE_PROFILES); IPR011009 (SUPERFAMILY)                                                                                                                                                                                                                                                                                                                                                                            |
| 132 | c11892_g1_i1_len_449_path_697_0_430_73_431_447_1161_448_448_3        | 10  | zinc finger protein 271-like                             | 150 | 4.19E-39 | 68.60% | 0.114 | IPR015880 (SMART); PF13465 (PFAM); PF13912 (PFAM); IPR013087 (G3DSA:3.30.160.GENE3D); IPR007087 (PFAM); IPR013087 (G3DSA:3.30.160.GENE3D); IPR013087 (G3DSA:3.30.160.GENE3D); IPR013087 (G3DSA:3.30.160.GENE3D); PTHR24409 (PANTHER); IPR007087 (PROSITE_PATTERNS); IPR007087 (PROSITE_PATTERNS); IPR007087 (PROSITE_PATTERNS); IPR007087 (PROSITE_PATTERNS); IPR007087 (PROSITE_PROFILES); IPR007087 (PROSITE_PROFILES); IPR007087 (PROSITE_PROFILES); IPR007087 (PROSITE_PROFILES); SSF57667 (SUPERFAMILY); SSF57667 (SUPERFAMILY); SSF57667 (SUPERFAMILY) |
| 133 | c119952_g1_i1_len_2075_path_2053_0_2074_1                            | 151 | protein disulfide-isomerase a6                           | 692 | 0        | 77.20% | 0.239 | PR00421 (PRINTS); IPR005788 (TIGRFAM); IPR012336 (G3DSA:3.40.30.GENE3D); IPR013766 (PFAM); PTHR18929:SF38 (PANTHER); PTHR18929 (PANTHER); IPR017937 (PROSITE_PATTERNS); IPR017937 (PROSITE_PATTERNS); TRANSMEMBRANE (PHOBIUS); NON_CYTOPLASMIC_DOMAIN (PHOBIUS); CYTOPLASMIC_DOMAIN (PHOBIUS); IPR012336 (PROSITE_PROFILES); IPR012336 (PROSITE_PROFILES); IPR012336 (SUPERFAMILY); IPR012336 (SUPERFAMILY); IPR012336 (SUPERFAMILY); TMhelix (TMHMM)                                                                                                        |



|     |                                           |     |                                                                             |      |           |        |        |                                                                                                                                                                                                                                                                                                                                                                                                                                                                                                                                                |
|-----|-------------------------------------------|-----|-----------------------------------------------------------------------------|------|-----------|--------|--------|------------------------------------------------------------------------------------------------------------------------------------------------------------------------------------------------------------------------------------------------------------------------------------------------------------------------------------------------------------------------------------------------------------------------------------------------------------------------------------------------------------------------------------------------|
| 134 | c119979_g1_i1_len_3138_path_1_0_3137_2    | 379 | atp-dependent rna helicase ddx1                                             | 1046 | 0         | 83.50% | 0.332  | IPR014001 (SMART); IPR001650 (SMART); IPR003877 (SMART); IPR027417 (G3DSA:3.40.50.GENE3D); IPR003877 (PFAM); IPR027417 (G3DSA:3.40.50.GENE3D); IPR011545 (PFAM); IPR001650 (PFAM); PTHR24031 (PANTHER); PTHR24031:SF211 (PANTHER); NON_CYTOPLASMIC_DOMAIN (PHOBIUS); CYTOPLASMIC_DOMAIN (PHOBIUS); TRANSMEMBRANE (PHOBIUS); IPR001650 (PROSITE_PROFILES); IPR014001 (PROSITE_PROFILES); IPR014014 (PROSITE_PROFILES); IPR001870 (PROSITE_PROFILES); IPR027417 (SUPERFAMILY); IPR027417 (SUPERFAMILY); IPR013320 (SUPERFAMILY); TMhelix (TMHMM) |
| 136 | c11999_g1_i1_len_816_path_794_0_815_4     | 44  | adp-ribosylation factor-like protein 4a                                     | 272  | 2.70E-95  | 86.70% | 0.119  | IPR006689 (PRINTS); IPR006687 (SMART); IPR003579 (SMART); IPR024156 (SMART); IPR005225 (TIGRFAM); IPR006689 (PFAM); IPR027417 (G3DSA:3.40.50.GENE3D); PTHR11711 (PANTHER); PTHR11711:SF121 (PANTHER); IPR024156 (PROSITE_PROFILES); IPR027417 (SUPERFAMILY)                                                                                                                                                                                                                                                                                    |
| 135 | c119990_g1_i1_len_375_path_353_0_374_2    | 6   | cysteine peptidase c                                                        | 125  | 2.08E-33  | 75.80% | 0.098  | G3DSA:3.90.70.10 (GENE3D); IPR000668 (PFAM); IPR013128 (PANTHER); SSF54001 (SUPERFAMILY)                                                                                                                                                                                                                                                                                                                                                                                                                                                       |
| 137 | c120014_g1_i1_len_900_path_878_0_899_3    | 36  | heat shock 70 kda protein cognate 4                                         | 300  | 1.24E-80  | 81.70% | 0.138  | Coil (COILS); IPR013126 (PRINTS); G3DSA:3.30.30.30 (GENE3D); IPR013126 (PFAM); G3DSA:3.30.420.40 (GENE3D); PTHR19375 (PANTHER); IPR018181 (PROSITE_PATTERNS); SSF53067 (SUPERFAMILY)                                                                                                                                                                                                                                                                                                                                                           |
| 138 | c120054_g1_i1_len_658_path_1_0_657_3      | 11  | group xv phospholipase a2-like                                              | 220  | 3.84E-74  | 84.10% | 0.361Y | IPR003386 (PFAM); PTHR11440 (PANTHER); PTHR11440:SF47 (PANTHER); TMhelix (TMHMM)                                                                                                                                                                                                                                                                                                                                                                                                                                                               |
| 139 | c120123_g1_i1_len_344_path_322_0_343_3    | 5   | moxd1 homolog 2                                                             | 115  | 6.60E-19  | 57.10% | 0.104  | IPR000323 (G3DSA:2.60.120.GENE3D); IPR000323 (PFAM); PTHR10157:SF23 (PANTHER); IPR000945 (PANTHER); IPR008977 (SUPERFAMILY)                                                                                                                                                                                                                                                                                                                                                                                                                    |
| 140 | c120323_g1_i1_len_1235_path_1213_0_1234_4 | 42  | cartilage oligomeric matrix protein                                         | 412  | 2.02E-83  | 53.80% | 0.109  | Coil (COILS); IPR024665 (PFAM); CYTOPLASMIC_DOMAIN (PHOBIUS); NON_CYTOPLASMIC_DOMAIN (PHOBIUS); TRANSMEMBRANE (PHOBIUS); NON_CYTOPLASMIC_DOMAIN (PHOBIUS)                                                                                                                                                                                                                                                                                                                                                                                      |
| 141 | c120340_g1_i1_len_1355_path_1333_0_1354_0 | 54  | low quality protein: prolown-density lipoprotein receptor-related protein 1 | 452  | 2.13E-120 | 59.80% | 0.104  | IPR000742 (SMART); IPR000033 (SMART); G3DSA:2.10.25.10 (GENE3D); G3DSA:2.10.25.10 (GENE3D); IPR011042 (G3DSA:2.120.10.GENE3D); G3DSA:2.10.25.10 (GENE3D); IPR000033 (PFAM); PTHR10529 (PANTHER); PTHR10529:SF204 (PANTHER); IPR013032 (PROSITE_PATTERNS); IPR013032 (PROSITE_PATTERNS); IPR000742 (PROSITE_PROFILES); IPR000742 (PROSITE_PROFILES); IPR000033 (PROSITE_PROFILES); IPR000033 (PROSITE_PROFILES); IPR000033 (PROSITE_PROFILES); SSF57196 (SUPERFAMILY); SSF63825 (SUPERFAMILY)                                                   |
| 142 | c12041_g1_i1_len_918_path_1_0_917_4       | 19  | low affinity immunoglobulin epsilon fc receptor isoform x2                  | 306  | 2.89E-19  | 54.60% | 0.125  | IPR001304 (SMART); IPR001304 (PFAM); IPR016186 (G3DSA:3.10.100.GENE3D); PTHR22802 (PANTHER); IPR001304 (PROSITE_PROFILES); IPR016187 (SUPERFAMILY)                                                                                                                                                                                                                                                                                                                                                                                             |
| 143 | c12041_g1_i1_len_918_path_1_0_917_5       | 19  | macrophage mannose receptor 1-like                                          | 306  | 4.44E-28  | 55.60% | 0.257  | IPR001304 (SMART); IPR001304 (PFAM); IPR016186 (G3DSA:3.10.100.GENE3D); PTHR22803 (PANTHER); PTHR22803:SF16 (PANTHER); IPR001304 (PROSITE_PROFILES); IPR001304 (PROSITE_PROFILES); IPR016187 (SUPERFAMILY); IPR016187 (SUPERFAMILY)                                                                                                                                                                                                                                                                                                            |
| 144 | c120425_g1_i1_len_788_path_1_0_787_5      | 12  | c4b-binding protein beta chain                                              | 262  | 8.43E-49  | 60.50% | 0.166  | IPR000436 (SMART); IPR008197 (G3DSA:4.10.75.GENE3D); IPR000436 (PFAM); G3DSA:2.10.70.10 (GENE3D); IPR008197 (PFAM); PTHR19325 (PANTHER); TRANSMEMBRANE (PHOBIUS); CYTOPLASMIC_DOMAIN (PHOBIUS); NON_CYTOPLASMIC_DOMAIN (PHOBIUS); IPR000436 (PROSITE_PROFILES); IPR008197 (PROSITE_PROFILES); IPR000436 (PROSITE_PROFILES); IPR000436 (SUPERFAMILY); IPR000436 (SUPERFAMILY)                                                                                                                                                                   |
| 145 | c120450_g1_i1_len_626_path_1_0_625_5      | 16  | cyclin-t isoform x6                                                         | 208  | 1.53E-128 | 94.20% | 0.103  | IPR013763 (SMART); PIRSF028758 (PIRSF); IPR006671 (PFAM); IPR013763 (G3DSA:1.10.472.GENE3D); IPR015430 (PTHR10026:PANTHER); IPR015429 (PANTHER); IPR013763 (SUPERFAMILY); IPR013763 (SUPERFAMILY)                                                                                                                                                                                                                                                                                                                                              |
| 146 | c120473_g1_i1_len_449_path_1_0_448_5      | 8   | voltage-gated sodium partial                                                | 149  | 1.92E-79  | 92.10% | 0.106  | IPR027359 (G3DSA:1.20.120.GENE3D); IPR005821 (PFAM); PTHR10037 (PANTHER); IPR028814 (PTHR10037:PANTHER); CYTOPLASMIC_DOMAIN (PHOBIUS); NON_CYTOPLASMIC_DOMAIN (PHOBIUS); TRANSMEMBRANE (PHOBIUS); TRANSMEMBRANE (PHOBIUS); CYTOPLASMIC_DOMAIN (PHOBIUS); NON_CYTOPLASMIC_DOMAIN (PHOBIUS); TRANSMEMBRANE (PHOBIUS); SSF81324 (SUPERFAMILY); TMhelix (TMHMM); TMhelix (TMHMM); TMhelix (TMHMM)                                                                                                                                                  |







|     |                                           |       |                                                   |     |           |        |        |                                                                                                                                                                                                                                                                                                                                                                                                                                                                                                    |
|-----|-------------------------------------------|-------|---------------------------------------------------|-----|-----------|--------|--------|----------------------------------------------------------------------------------------------------------------------------------------------------------------------------------------------------------------------------------------------------------------------------------------------------------------------------------------------------------------------------------------------------------------------------------------------------------------------------------------------------|
| 179 | c121467_g1_i1_len_467_path_445_0_466_4    | 9     | wd sam and u-box domain-containing protein 1-like | 156 | 6.81E-41  | 69.30% | 0.15   | IPR020472 (PRINTS); IPR001680 (SMART); IPR001680 (PFAM); IPR015943 (G3DSA:2.130.10.GENE3D); PTHR22847 (PANTHER); IPR019775 (PROSITE_PATTERNS); IPR019775 (PROSITE_PATTERNS); IPR001680 (PROSITE_PROFILES); IPR001680 (PROSITE_PROFILES); IPR017986 (PROSITE_PROFILES); IPR001680 (PROSITE_PROFILES); IPR011047 (SUPERFAMILY)                                                                                                                                                                       |
| 180 | c121607_g1_i1_len_1338_path_1_0_1337_2    | 95    | allatostatin precursor protein                    | 446 | 1.16E-33  | 53.40% | 0.104  | IPR010276 (PFAM); TRANSMEMBRANE (PHOBIUS); NON_CYTOPLASMIC_DOMAIN (PHOBIUS); TRANSMEMBRANE (PHOBIUS); CYTOPLASMIC_DOMAIN (PHOBIUS); CYTOPLASMIC_DOMAIN (PHOBIUS)                                                                                                                                                                                                                                                                                                                                   |
| 181 | c121625_g1_i1_len_387_path_365_0_386_1    | 10    | scavenger partial                                 | 129 | 3.61E-58  | 82.50% | 0.113  | IPR001695 (PFAM); PTHR19331:SF77 (PANTHER); PTHR19331 (PANTHER); IPR001190 (PROSITE_PROFILES); IPR017448 (SUPERFAMILY)                                                                                                                                                                                                                                                                                                                                                                             |
| 182 | c121685_g1_i1_len_358_path_336_0_357_2    | 6     | Idl receptor protein isoform g                    | 119 | 2.57E-25  | 63.40% | 0.106  | IPR002172 (PRINTS); IPR002172 (SMART); IPR002172 (G3DSA:4.10.400.GENE3D); G3DSA:4.10.1220.10 (GENE3D); IPR002172 (PFAM); PTHR10529 (PANTHER); IPR023415 (PROSITE_PATTERNS); IPR023415 (PROSITE_PATTERNS); IPR002172 (PROSITE_PROFILES); IPR002172 (PROSITE_PROFILES); IPR002172 (SUPERFAMILY); IPR002172 (SUPERFAMILY)                                                                                                                                                                             |
| 183 | c121716_g1_i1_len_715_path_693_0_714_1    | 13    | macrophage mannose receptor 1-like                | 238 | 1.35E-22  | 43.00% | 0.113  | IPR001304 (SMART); IPR016186 (G3DSA:3.10.100.GENE3D); IPR016186 (G3DSA:3.10.100.GENE3D); IPR016186 (G3DSA:3.10.100.GENE3D); IPR001304 (PFAM); PTHR22803 (PANTHER); IPR001304 (PROSITE_PROFILES); IPR001304 (PROSITE_PROFILES); IPR016187 (SUPERFAMILY); IPR016187 (SUPERFAMILY)                                                                                                                                                                                                                    |
| 184 | c121773_g1_i1_len_436_path_414_0_435_5    | 14    | fras1-related extracellular matrix protein 1      | 145 | 8.27E-22  | 54.80% | 0.113  | IPR001304 (SMART); IPR001304 (PFAM); IPR016186 (G3DSA:3.10.100.GENE3D); PTHR22801 (PANTHER); IPR018378 (PROSITE_PATTERNS); IPR001304 (PROSITE_PROFILES); IPR016187 (SUPERFAMILY)                                                                                                                                                                                                                                                                                                                   |
| 185 | c121787_g1_i1_len_267_path_245_0_266_3    | 5     | dopamine beta- partial                            | 89  | 1.96E-15  | 61.70% | 0.118  | IPR000945 (PRINTS); IPR000323 (PFAM); IPR000323 (G3DSA:2.60.120.GENE3D); IPR000945 (PANTHER); PTHR10157:SF22 (PANTHER); IPR008977 (SUPERFAMILY)                                                                                                                                                                                                                                                                                                                                                    |
| 186 | c121827_g1_i1_len_1397_path_1375_0_1396_0 | 36    | retinol dehydrogenase 13-like                     | 466 | 1.07E-52  | 64.70% | 0.126  | IPR002347 (PRINTS); IPR016040 (G3DSA:3.40.50.GENE3D); PTHR24320:SF55 (PANTHER); PTHR24320 (PANTHER); SSF51735 (SUPERFAMILY)                                                                                                                                                                                                                                                                                                                                                                        |
| 187 | c121851_g1_i1_len_1327_path_1305_0_1326_4 | 49    | probable serine carboxypeptidase cpvl isoform x2  | 442 | 3.01E-118 | 62.80% | 0.13   | IPR001563 (PRINTS); IPR029058 (G3DSA:3.40.50.GENE3D); IPR001563 (PFAM); PTHR11802:SF30 (PANTHER); IPR001563 (PANTHER); IPR018202 (PROSITE_PATTERNS); IPR029058 (SUPERFAMILY)                                                                                                                                                                                                                                                                                                                       |
| 188 | c121856_g1_i1_len_1194_path_1172_0_1193_0 | 61    | 26s protease regulatory subunit 6b                | 398 | 0         | 95.10% | 0.099  | Coil (COILS); IPR001270 (PRINTS); IPR003593 (SMART); IPR027417 (G3DSA:3.40.50.GENE3D); G3DSA:1.10.8.60 (GENE3D); IPR003959 (PFAM); IPR005937 (TIGRFAM); PTHR23073 (PANTHER); PTHR23073:SF8 (PANTHER); IPR003960 (PROSITE_PATTERNS); IPR027417 (SUPERFAMILY)                                                                                                                                                                                                                                        |
| 219 | c122_g1_i1_len_1057_path_1085_0_1056_4    | 46    | plexin- partial                                   | 352 | 1.78E-118 | 78.40% | 0.269  | IPR002909 (SMART); G3DSA:3.30.1680.10 (GENE3D); IPR002909 (PFAM); IPR013783 (G3DSA:2.60.40.GENE3D); IPR013783 (G3DSA:2.60.40.GENE3D); PTHR22625 (PANTHER); PTHR22625:SF16 (PANTHER); IPR014756 (SUPERFAMILY); IPR014756 (SUPERFAMILY)                                                                                                                                                                                                                                                              |
| 189 | c122010_g1_i1_len_798_path_1_0_797_5      | 14    | low quality protein: sco-spondin                  | 266 | 3.63E-23  | 44.50% | 0.114  | IPR002172 (PRINTS); IPR002172 (SMART); IPR002172 (G3DSA:4.10.400.GENE3D); G3DSA:4.10.1220.10 (GENE3D); IPR002172 (G3DSA:4.10.400.GENE3D); IPR002172 (PFAM); IPR002172 (G3DSA:4.10.400.GENE3D); PTHR10529:SF208 (PANTHER); PTHR10529 (PANTHER); IPR002172 (PROSITE_PROFILES); IPR002172 (PROSITE_PROFILES); IPR002172 (PROSITE_PROFILES); IPR002172 (PROSITE_PROFILES); IPR002172 (SUPERFAMILY); IPR002172 (SUPERFAMILY); IPR002172 (SUPERFAMILY); IPR002172 (SUPERFAMILY); IPR002172 (SUPERFAMILY) |
| 190 | c122024_g1_i1_len_307_path_1_0_306_3      | 10    | heat shock protein                                | 103 | 2.21E-48  | 89.90% | 0.11   | IPR029047 (G3DSA:2.60.34.GENE3D); IPR029048 (G3DSA:1.20.1270.GENE3D); IPR013126 (PFAM); PTHR19375:SF142 (PANTHER); PTHR19375 (PANTHER); IPR029047 (SUPERFAMILY); IPR029048 (SUPERFAMILY)                                                                                                                                                                                                                                                                                                           |
| 191 | c122041_g1_i1_len_330_path_1_0_329_2      | 21    | peptidyl-prolyl cis-trans isomerase-like          | 110 | 2.72E-43  | 84.90% | 0.599Y | IPR002130 (PRINTS); IPR002130 (PFAM); IPR029000 (G3DSA:2.40.100.GENE3D); IPR024936 (PANTHER); IPR020892 (PROSITE_PATTERNS); IPR002130 (PROSITE_PROFILES); SignalP-noTM (SIGNALP_EUK); IPR029000 (SUPERFAMILY)                                                                                                                                                                                                                                                                                      |
| 192 | c122114_g1_i1_len_888_path_1_0_887_2      | 15205 | translationally controlled tumor protein          | 296 | 4.17E-71  | 79.20% | 0.269  | IPR018105 (PRINTS); IPR018105 (PFAM); IPR011323 (G3DSA:2.170.150.GENE3D); IPR018105 (PANTHER); IPR011057 (SUPERFAMILY)                                                                                                                                                                                                                                                                                                                                                                             |



|     |                                           |     |                                                          |     |           |        |       |                                                                                                                                                                                                                                                                                                                                                                                                                                                                                                                                                                     |
|-----|-------------------------------------------|-----|----------------------------------------------------------|-----|-----------|--------|-------|---------------------------------------------------------------------------------------------------------------------------------------------------------------------------------------------------------------------------------------------------------------------------------------------------------------------------------------------------------------------------------------------------------------------------------------------------------------------------------------------------------------------------------------------------------------------|
| 193 | c122187_g1_i1_len_1330_path_1_0_1329_3    | 61  | acid sphingomyelinase-like phosphodiesterase 3b          | 444 | 1.88E-66  | 55.00% | 0.108 | IPR029052 (G3DSA:3.60.21.GENE3D); PTHR10340 (PANTHER); NON_CYTOPLASMIC_DOMAIN (PHOBIUS); TRANSMEMBRANE (PHOBIUS); CYTOPLASMIC_DOMAIN (PHOBIUS); IPR029052 (SUPERFAMILY); TMhelix (TMHMM)                                                                                                                                                                                                                                                                                                                                                                            |
| 194 | c122188_g1_i1_len_1175_path_1153_0_1174_2 | 75  | Ectodysplasin-A                                          | 391 | 2.08E-57  | 58.30% | 0.106 | IPR008983 (G3DSA:2.60.120.GENE3D); IPR006052 (PFAM); PTHR15151:SF4 (PANTHER); PTHR15151 (PANTHER); IPR021184 (PROSITE_PATTERNS); IPR006052 (PROSITE_PROFILES); IPR008983 (SUPERFAMILY)                                                                                                                                                                                                                                                                                                                                                                              |
| 195 | c12224_g1_i1_len_159_path_137_0_158_2     | 1   | thrombospondin type-1 domain-containing protein 4-like   | 53  | 1.16E-17  | 69.20% | 0.127 | IPR000884 (PFAM); G3DSA:2.20.100.10 (GENE3D); PTHR13723 (PANTHER); IPR000884 (PROSITE_PROFILES); IPR000884 (SUPERFAMILY)                                                                                                                                                                                                                                                                                                                                                                                                                                            |
| 196 | c122335_g1_i1_len_1622_path_1650_0_1621_4 | 146 | agap005784-pa-like protein                               | 541 | 1.70E-47  | 61.70% | 0.114 | IPR001258 (PFAM); IPR011042 (G3DSA:2.120.10.GENE3D); PTHR10680 (PANTHER); IPR013017 (PROSITE_PROFILES); IPR013017 (PROSITE_PROFILES); SSF101898 (SUPERFAMILY)                                                                                                                                                                                                                                                                                                                                                                                                       |
| 197 | c122368_g1_i1_len_952_path_930_0_951_4    | 31  | sh3 and multiple ankyrin repeat domains protein partial  | 317 | 4.35E-167 | 86.60% | 0.098 | IPR002110 (SMART); IPR020683 (PFAM); IPR020683 (G3DSA:1.25.40.GENE3D); PTHR24135 (PANTHER); IPR002110 (PROSITE_PROFILES); IPR020683 (PROSITE_PROFILES); IPR002110 (PROSITE_PROFILES); IPR020683 (SUPERFAMILY)                                                                                                                                                                                                                                                                                                                                                       |
| 198 | c122370_g1_i1_len_389_path_367_0_388_4    | 5   | long form                                                | 130 | 3.66E-74  | 96.20% | 0.109 | Coil (COILS); Coil (COILS); Coil (COILS); IPR002928 (PFAM); PTHR13140:SF164 (PANTHER); PTHR13140 (PANTHER)                                                                                                                                                                                                                                                                                                                                                                                                                                                          |
| 199 | c122372_g1_i1_len_2532_path_1_0_2531_3    | 283 | atp-dependent zinc metalloprotease yme1 homolog          | 844 | 0         | 75.30% | 0.27  | IPR003593 (SMART); G3DSA:1.10.8.60 (GENE3D); IPR027417 (G3DSA:3.40.50.GENE3D); IPR005936 (TIGRFAM); IPR000642 (PFAM); IPR003959 (PFAM); PTHR23076:SF37 (PANTHER); PTHR23076 (PANTHER); IPR003960 (PROSITE_PATTERNS); CYTOPLASMIC_DOMAIN (PHOBIUS); CYTOPLASMIC_DOMAIN (PHOBIUS); NON_CYTOPLASMIC_DOMAIN (PHOBIUS); TRANSMEMBRANE (PHOBIUS); TRANSMEMBRANE (PHOBIUS); NON_CYTOPLASMIC_DOMAIN (PHOBIUS); TRANSMEMBRANE (PHOBIUS); CYTOPLASMIC_DOMAIN (PHOBIUS); IPR005936 (HAMAP); SSF140990 (SUPERFAMILY); IPR027417 (SUPERFAMILY); TMhelix (TMHMM); TMhelix (TMHMM) |
| 200 | c122374_g1_i1_len_606_path_1_0_605_2      | 13  | protein cbfa2t1-like isoform x5                          | 202 | 4.66E-70  | 77.50% | 0.134 | Coil (COILS); Coil (COILS); IPR013289 (PRINTS); IPR002893 (PFAM); PTHR10379 (PANTHER); IPR002893 (PROSITE_PATTERNS); IPR002893 (PROSITE_PROFILES); SSF144232 (SUPERFAMILY)                                                                                                                                                                                                                                                                                                                                                                                          |
| 201 | c122383_g1_i1_len_583_path_561_0_582_1    | 24  | low quality protein: myosin heavy muscle                 | 194 | 1.42E-114 | 98.20% | 0.112 | Coil (COILS); Coil (COILS); IPR002928 (PFAM); PTHR13140 (PANTHER); PTHR13140:SF364 (PANTHER); SSF57997 (SUPERFAMILY)                                                                                                                                                                                                                                                                                                                                                                                                                                                |
| 202 | c122423_g1_i1_len_1203_path_1181_0_1202_2 | 176 | isoform d                                                | 401 | 5.52E-48  | 60.00% | 0.223 | IPR003585 (SMART); IPR027789 (PFAM); PTHR10915:SF1 (PANTHER); IPR001050 (PANTHER); IPR030479 (PROSITE_PATTERNS); TRANSMEMBRANE (PHOBIUS); CYTOPLASMIC_DOMAIN (PHOBIUS); CYTOPLASMIC_DOMAIN (PHOBIUS); NON_CYTOPLASMIC_DOMAIN (PHOBIUS); TRANSMEMBRANE (PHOBIUS); TMhelix (TMHMM)                                                                                                                                                                                                                                                                                    |
| 203 | c122429_g1_i1_len_1230_path_1_0_1229_2    | 112 | heat shock protein 40                                    | 410 | 0         | 82.80% | 0.143 | IPR001623 (PRINTS); IPR001623 (SMART); IPR002939 (PFAM); G3DSA:2.60.260.20 (GENE3D); IPR001623 (PFAM); IPR001623 (G3DSA:1.10.287.GENE3D); G3DSA:2.60.260.20 (GENE3D); PTHR24077:SF211 (PANTHER); PTHR24077 (PANTHER); IPR018253 (PROSITE_PATTERNS); IPR001623 (PROSITE_PROFILES); IPR008971 (SUPERFAMILY); IPR001623 (SUPERFAMILY); IPR008971 (SUPERFAMILY)                                                                                                                                                                                                         |
| 204 | c122486_g1_i1_len_750_path_728_0_749_1    | 13  | transferrin                                              | 250 | 1.18E-58  | 57.90% | 0.106 | Coil (COILS); IPR001156 (PRINTS); IPR001156 (SMART); G3DSA:3.40.190.10 (GENE3D); G3DSA:3.40.190.10 (GENE3D); IPR001156 (PFAM); PTHR11485 (PANTHER); PTHR11485:SF19 (PANTHER); IPR001156 (PROSITE_PROFILES); IPR001156 (PROSITE_PROFILES); SSF53850 (SUPERFAMILY); SSF53850 (SUPERFAMILY)                                                                                                                                                                                                                                                                            |
| 205 | c122547_g1_i1_len_842_path_1_0_841_2      | 17  | peroxisomal sarcosine oxidase                            | 280 | 7.24E-74  | 59.70% | 0.153 | IPR006076 (PFAM); G3DSA:3.50.50.60 (GENE3D); G3DSA:3.30.9.10 (GENE3D); PTHR10961 (PANTHER); PTHR10961:SF7 (PANTHER); SSF51905 (SUPERFAMILY)                                                                                                                                                                                                                                                                                                                                                                                                                         |
| 206 | c122611_g1_i1_len_606_path_584_0_605_2    | 17  | vascular endothelial growth factor receptor 1 isoform x2 | 202 | 5.86E-26  | 47.60% | 0.157 | IPR003599 (SMART); IPR003598 (SMART); IPR013783 (G3DSA:2.60.40.GENE3D); IPR013106 (PFAM); IPR007110 (PROSITE_PROFILES); SSF48726 (SUPERFAMILY)                                                                                                                                                                                                                                                                                                                                                                                                                      |
| 207 | c122699_g1_i1_len_765_path_743_0_764_0    | 31  | homerin isoform x2                                       | 255 | 3.48E-29  | 50.50% | 0.104 | IPR001314 (PRINTS); IPR001254 (SMART); G3DSA:2.40.10.10 (GENE3D); IPR001254 (PFAM); G3DSA:2.40.10.10 (GENE3D); G3DSA:2.40.10.10 (GENE3D); PTHR24268 (PANTHER); IPR001254 (PROSITE_PROFILES); IPR009003 (SUPERFAMILY)                                                                                                                                                                                                                                                                                                                                                |

|     |                                                |     |                                                                       |     |           |        |       |                                                                                                                                                                                                                                                                                                                                                                                                                 |
|-----|------------------------------------------------|-----|-----------------------------------------------------------------------|-----|-----------|--------|-------|-----------------------------------------------------------------------------------------------------------------------------------------------------------------------------------------------------------------------------------------------------------------------------------------------------------------------------------------------------------------------------------------------------------------|
| 208 | c122748_g1_i1_len_910_path_1_0_909_1           | 63  | l-xylulose reductase                                                  | 303 | 1.96E-114 | 78.00% | 0.12  | IPR002347 (PRINTS); IPR002198 (PRINTS); IPR013968 (SMART); PF13561 (PFAM); IPR016040 (G3DSA:3.40.50.GENE3D); PTHR24311:SF6 (PANTHER); PTHR24311 (PANTHER); IPR020904 (PROSITE_PATTERNS); SSF51735 (SUPERFAMILY)                                                                                                                                                                                                 |
| 209 | c122754_g1_i1_len_1082_path_1060_0_1081_1      | 65  | probable serine carboxypeptidase cpvl isoform x1                      | 361 | 7.98E-93  | 65.30% | 0.252 | IPR001563 (PRINTS); IPR029058 (G3DSA:3.40.50.GENE3D); IPR001563 (PFAM); PTHR11802:SF30 (PANTHER); IPR001563 (PANTHER); IPR029058 (SUPERFAMILY)                                                                                                                                                                                                                                                                  |
| 210 | c122755_g1_i1_len_1450_path_1_0_1449_0         | 280 | 26s protease regulatory subunit 7                                     | 484 | 0         | 96.10% | 0.186 | IPR003593 (SMART); G3DSA:1.10.8.60 (GENE3D); IPR027417 (G3DSA:3.40.50.GENE3D); IPR005937 (TIGRFAM); IPR003959 (PFAM); PTHR23073:SF13 (PANTHER); PTHR23073 (PANTHER); IPR003960 (PROSITE_PATTERNS); TRANSMEMBRANE (PHOBIUS); CYTOPLASMIC_DOMAIN (PHOBIUS); NON_CYTOPLASMIC_DOMAIN (PHOBIUS); IPR027417 (SUPERFAMILY); TMhelix (TMHMM)                                                                            |
| 211 | c122781_g1_i1_len_866_path_1_0_865_0           | 22  | chorion peroxidase                                                    | 289 | 2.05E-51  | 61.00% | 0.163 | IPR019791 (PFAM); IPR019791 (G3DSA:1.10.640.GENE3D); PTHR11475 (PANTHER); IPR019791 (PROSITE_PROFILES); IPR010255 (SUPERFAMILY)                                                                                                                                                                                                                                                                                 |
| 212 | c12279_g1_i1_len_409_path_387_0_408_5          | 14  | venom serine carboxypeptidase-like                                    | 136 | 2.75E-29  | 66.00% | 0.117 | IPR001563 (PFAM); IPR029058 (G3DSA:3.40.50.GENE3D); IPR001563 (PANTHER); IPR018202 (PROSITE_PATTERNS); IPR029058 (SUPERFAMILY)                                                                                                                                                                                                                                                                                  |
| 213 | c122866_g1_i1_len_719_path_697_0_718_0         | 21  | titin- partial                                                        | 240 | 4.26E-115 | 81.90% | 0.098 | IPR003599 (SMART); IPR003598 (SMART); IPR013098 (PFAM); IPR013783 (G3DSA:2.60.40.GENE3D); IPR013783 (G3DSA:2.60.40.GENE3D); PTHR19897:SF149 (PANTHER); PTHR19897 (PANTHER); IPR007110 (PROSITE_PROFILES); IPR007110 (PROSITE_PROFILES); SSF48726 (SUPERFAMILY); SSF48726 (SUPERFAMILY)                                                                                                                          |
| 217 | c1229_g1_i1_len_197_path_675_0_63_202_64_196_5 | 2   | cadherin-related tumor suppressor- partial                            | 65  | 3.17E-08  | 64.00% | 0.19  | IPR000742 (SMART); IPR000742 (PFAM); G3DSA:2.10.25.10 (GENE3D); IPR013032 (PROSITE_PATTERNS); IPR000742 (PROSITE_PROFILES); SSF57196 (SUPERFAMILY)                                                                                                                                                                                                                                                              |
| 218 | c1229_g1_i2_len_334_path_1_0_200_202_201_333_5 | 3   | agrin- partial                                                        | 111 | 5.00E-37  | 71.50% | 0.155 | IPR000742 (SMART); IPR013320 (G3DSA:2.60.120.GENE3D); G3DSA:2.10.25.10 (GENE3D); IPR000742 (PFAM); PTHR10574:SF227 (PANTHER); PTHR10574 (PANTHER); IPR013032 (PROSITE_PATTERNS); IPR000742 (PROSITE_PROFILES); IPR013320 (SUPERFAMILY)                                                                                                                                                                          |
| 214 | c122900_g1_i1_len_636_path_614_0_635_3         | 13  | meteorin-like protein                                                 | 212 | 3.46E-14  | 62.20% | 0.101 | no IPS match                                                                                                                                                                                                                                                                                                                                                                                                    |
| 215 | c122940_g1_i1_len_600_path_578_0_599_3         | 13  | neutral endopeptidase                                                 | 200 | 2.98E-59  | 70.40% | 0.132 | IPR008753 (PFAM); G3DSA:1.10.1380.10 (GENE3D); PTHR11733:SF113 (PANTHER); IPR000718 (PANTHER); SSF55486 (SUPERFAMILY)                                                                                                                                                                                                                                                                                           |
| 216 | c122990_g1_i1_len_764_path_1_0_763_1           | 14  | adam 17-like protease                                                 | 255 | 2.85E-83  | 82.90% | 0.1   | PTHR11905 (PANTHER); PTHR11905:SF121 (PANTHER); NON_CYTOPLASMIC_DOMAIN (PHOBIUS); CYTOPLASMIC_DOMAIN (PHOBIUS); TRANSMEMBRANE (PHOBIUS); TRANSMEMBRANE (PHOBIUS); NON_CYTOPLASMIC_DOMAIN (PHOBIUS); TMhelix (TMHMM); TMhelix (TMHMM)                                                                                                                                                                            |
| 220 | c123004_g1_i1_len_252_path_230_0_251_0         | 4   | neurexin-3- partial                                                   | 84  | 1.32E-13  | 74.20% | 0.23  | IPR027789 (PFAM); CYTOPLASMIC_DOMAIN (PHOBIUS); NON_CYTOPLASMIC_DOMAIN (PHOBIUS); TRANSMEMBRANE (PHOBIUS); TMhelix (TMHMM)                                                                                                                                                                                                                                                                                      |
| 221 | c123034_g1_i1_len_1781_path_1_0_1780_1         | 97  | dual specificity mitogen-activated protein kinase kinase 4-like       | 594 | 0         | 89.60% | 0.169 | IPR002290 (SMART); IPR000719 (PFAM); G3DSA:3.30.200.20 (GENE3D); G3DSA:1.10.510.10 (GENE3D); PTHR24360:SF46 (PANTHER); PTHR24360 (PANTHER); IPR017441 (PROSITE_PATTERNS); IPR008271 (PROSITE_PATTERNS); IPR000719 (PROSITE_PROFILES); IPR011009 (SUPERFAMILY)                                                                                                                                                   |
| 222 | c123063_g1_i1_len_341_path_1_0_340_2           | 12  | xanthine dehydrogenase                                                | 113 | 3.79E-40  | 80.20% | 0.104 | IPR000674 (PFAM); IPR000674 (G3DSA:3.90.1170.GENE3D); IPR008274 (PFAM); IPR008274 (G3DSA:3.30.365.GENE3D); PTHR11908 (PANTHER); PTHR11908:SF32 (PANTHER); IPR008274 (SUPERFAMILY); IPR000674 (SUPERFAMILY)                                                                                                                                                                                                      |
| 223 | c123088_g1_i1_len_1114_path_1092_0_1113_2      | 144 | aminoacyl trna synthase complex-interacting multifunctional protein 1 | 371 | 8.53E-100 | 68.30% | 0.119 | Coil (COILS); IPR002547 (PFAM); IPR012340 (G3DSA:2.40.50.GENE3D); PTHR11586 (PANTHER); PTHR11586:SF1 (PANTHER); IPR002547 (PROSITE_PROFILES); IPR012340 (SUPERFAMILY)                                                                                                                                                                                                                                           |
| 224 | c123130_g1_i1_len_1322_path_1_0_1321_3         | 345 | adp-ribosylation factor-like protein 8b-a                             | 441 | 6.97E-124 | 97.70% | 0.118 | IPR006689 (PRINTS); IPR003579 (SMART); IPR006687 (SMART); IPR024156 (SMART); IPR005225 (TIGRFAM); IPR027417 (G3DSA:3.40.50.GENE3D); IPR006689 (PFAM); PTHR11711 (PANTHER); PTHR11711:SF122 (PANTHER); NON_CYTOPLASMIC_DOMAIN (PHOBIUS); CYTOPLASMIC_DOMAIN (PHOBIUS); NON_CYTOPLASMIC_DOMAIN (PHOBIUS); TRANSMEMBRANE (PHOBIUS); TRANSMEMBRANE (PHOBIUS); IPR024156 (PROSITE_PROFILES); IPR027417 (SUPERFAMILY) |

|     |                                                         |     |                                                                       |     |           |        |         |                                                                                                                                                                                                                                                                                                                                                                                                                                                                                                             |
|-----|---------------------------------------------------------|-----|-----------------------------------------------------------------------|-----|-----------|--------|---------|-------------------------------------------------------------------------------------------------------------------------------------------------------------------------------------------------------------------------------------------------------------------------------------------------------------------------------------------------------------------------------------------------------------------------------------------------------------------------------------------------------------|
| 225 | c123208_g1_i1_len_1203_path_1181_0_1202_4               | 32  | c4b-binding protein beta                                              | 401 | 0         | 75.50% | 0.102   | IPR000436 (SMART); G3DSA:2.10.70.10 (GENE3D); G3DSA:2.10.70.10 (GENE3D); IPR000436 (PFAM); G3DSA:2.10.70.10 (GENE3D); IPR013783 (G3DSA:2.60.40.GENE3D); PTHR19325 (PANTHER); PTHR19325:SF230 (PANTHER); IPR000436 (PROSITE_PROFILES); IPR000436 (PROSITE_PROFILES); IPR000436 (PROSITE_PROFILES); IPR000436 (PROSITE_PROFILES); SSF48726 (SUPERFAMILY); IPR000436 (SUPERFAMILY); IPR000436 (SUPERFAMILY); IPR000436 (SUPERFAMILY)                                                                           |
| 226 | c123384_g1_i1_len_409_path_1_0_408_1                    | 6   | prolow-density lipoprotein receptor-related protein 1-like isoform x6 | 136 | 2.57E-15  | 52.20% | 0.105   | IPR002172 (PRINTS); IPR002172 (SMART); IPR002172 (G3DSA:4.10.400.GENE3D); IPR002172 (G3DSA:4.10.400.GENE3D); G3DSA:4.10.1220.10 (GENE3D); IPR002172 (PFAM); PTHR10529:SF204 (PANTHER); PTHR10529 (PANTHER); IPR002172 (PROSITE_PROFILES); IPR002172 (PROSITE_PROFILES); IPR002172 (SUPERFAMILY); IPR002172 (SUPERFAMILY); IPR002172 (SUPERFAMILY)                                                                                                                                                           |
| 227 | c123444_g1_i1_len_392_path_1_0_391_4                    | 10  | pr domain zinc finger protein 1                                       | 131 | 2.38E-71  | 98.00% | 0.097   | IPR015880 (SMART); IPR013087 (G3DSA:3.30.160.GENE3D); IPR013087 (G3DSA:3.30.160.GENE3D); IPR013087 (G3DSA:3.30.160.GENE3D); PF13465 (PFAM); IPR016608 (PTHR11389:PANTHER); PTHR11389 (PANTHER); IPR007087 (PROSITE_PATTERNS); IPR007087 (PROSITE_PATTERNS); IPR007087 (PROSITE_PATTERNS); IPR007087 (PROSITE_PROFILES); IPR007087 (PROSITE_PROFILES); IPR007087 (PROSITE_PROFILES); SSF57667 (SUPERFAMILY); SSF57667 (SUPERFAMILY)                                                                          |
| 228 | c12348_g1_i1_len_1269_path_1830_0_1195_99_1196_1268_3   | 114 | camp-dependent protein kinase catalytic subunit                       | 423 | 7.64E-151 | 94.20% | 0.124   | Coil (COILS); IPR002290 (SMART); IPR000719 (PFAM); G3DSA:1.10.510.10 (GENE3D); G3DSA:3.30.200.20 (GENE3D); PTHR24353 (PANTHER); IPR017441 (PROSITE_PATTERNS); IPR008271 (PROSITE_PATTERNS); IPR000719 (PROSITE_PROFILES); IPR011009 (SUPERFAMILY)                                                                                                                                                                                                                                                           |
| 229 | c12348_g1_i2_len_1597_path_1830_0_1195_3025_1196_1596_4 | 143 | camp-dependent protein kinase catalytic subunit                       | 532 | 1.58E-147 | 94.20% | 0.368Y  | Coil (COILS); IPR002290 (SMART); IPR000719 (PFAM); G3DSA:3.30.200.20 (GENE3D); G3DSA:1.10.510.10 (GENE3D); PTHR24353 (PANTHER); IPR008271 (PROSITE_PATTERNS); IPR017441 (PROSITE_PATTERNS); IPR000719 (PROSITE_PROFILES); IPR011009 (SUPERFAMILY)                                                                                                                                                                                                                                                           |
| 230 | c123527_g1_i1_len_411_path_389_0_410_1                  | 15  | hemagglutinin amebocyte aggregation factor-like                       | 137 | 4.57E-13  | 56.50% | 0.16    | PF14704 (PFAM); IPR026645 (PANTHER); PTHR15040:SF1 (PANTHER); TRANSMEMBRANE (PHOBIUS); CYTOPLASMIC_DOMAIN (PHOBIUS); NON_CYTOPLASMIC_DOMAIN (PHOBIUS); TMhelix (TMHMM)                                                                                                                                                                                                                                                                                                                                      |
| 231 | c123625_g1_i1_len_1122_path_1_0_1121_2                  | 36  | low quality protein: de-cadherin                                      | 374 | 4.27E-61  | 57.30% | 0.155   | IPR001791 (SMART); IPR027397 (G3DSA:4.10.900.GENE3D); IPR013320 (G3DSA:2.60.120.GENE3D); IPR001791 (PFAM); IPR000233 (PFAM); PTHR24027:SF276 (PANTHER); PTHR24027 (PANTHER); CYTOPLASMIC_DOMAIN (PHOBIUS); NON_CYTOPLASMIC_DOMAIN (PHOBIUS); TRANSMEMBRANE (PHOBIUS); IPR001791 (PROSITE_PROFILES); IPR013320 (SUPERFAMILY); TMhelix (TMHMM)                                                                                                                                                                |
| 232 | c123759_g1_i1_len_287_path_265_0_286_5                  | 5   | matrix metalloproteinase-17-like                                      | 95  | 1.22E-47  | 86.40% | 0.129   | IPR018487 (SMART); IPR000585 (G3DSA:2.110.10.GENE3D); IPR018487 (PFAM); PTHR10201:SF135 (PANTHER); PTHR10201 (PANTHER); IPR018487 (PROSITE_PROFILES); IPR018487 (PROSITE_PROFILES); IPR000585 (SUPERFAMILY)                                                                                                                                                                                                                                                                                                 |
| 233 | c123824_g1_i1_len_552_path_1_0_551_1                    | 18  | cd166 antigen                                                         | 184 | 2.08E-35  | 60.50% | 0.104   | IPR013783 (G3DSA:2.60.40.GENE3D); PTHR11640:SF52 (PANTHER); PTHR11640 (PANTHER); TRANSMEMBRANE (PHOBIUS); NON_CYTOPLASMIC_DOMAIN (PHOBIUS); CYTOPLASMIC_DOMAIN (PHOBIUS); SSF48726 (SUPERFAMILY); TMhelix (TMHMM)                                                                                                                                                                                                                                                                                           |
| 234 | c123838_g1_i1_len_646_path_624_0_645_2                  | 30  | fibronectin type 3 and ankyrin repeat domains protein 1               | 215 | 4.25E-42  | 69.50% | 0.455 Y | IPR002110 (PRINTS); IPR002110 (SMART); IPR020683 (G3DSA:1.25.40.GENE3D); IPR020683 (PFAM); IPR002110 (PFAM); PTHR24183:SF1 (PANTHER); PTHR24183 (PANTHER); NON_CYTOPLASMIC_DOMAIN (PHOBIUS); SIGNAL_PEPTIDE_N_REGION (PHOBIUS); SIGNAL_PEPTIDE_C_REGION (PHOBIUS); SIGNAL_PEPTIDE (PHOBIUS); SIGNAL_PEPTIDE_H_REGION (PHOBIUS); IPR020683 (PROSITE_PROFILES); IPR002110 (PROSITE_PROFILES); IPR002110 (PROSITE_PROFILES); IPR002110 (PROSITE_PROFILES); SignalP-noTM (SIGNALP_EUK); IPR020683 (SUPERFAMILY) |
| 235 | c123895_g1_i1_len_372_path_1_0_371_0                    | 5   | ovochoymase- partial                                                  | 124 | 6.16E-23  | 55.50% | 0.362 Y | IPR001254 (PFAM); G3DSA:2.40.10.10 (GENE3D); PTHR24265 (PANTHER); IPR018114 (PROSITE_PATTERNS); IPR001254 (PROSITE_PROFILES); IPR009003 (SUPERFAMILY)                                                                                                                                                                                                                                                                                                                                                       |
| 236 | c123902_g1_i1_len_808_path_786_0_807_0                  | 36  | hemagglutinin                                                         | 270 | 1.42E-26  | 55.50% | 0.175   | G3DSA:1.10.390.10 (GENE3D); IPR001570 (PFAM); IPR007280 (PFAM); TRANSMEMBRANE (PHOBIUS); CYTOPLASMIC_DOMAIN (PHOBIUS); CYTOPLASMIC_DOMAIN (PHOBIUS); NON_CYTOPLASMIC_DOMAIN (PHOBIUS); TRANSMEMBRANE (PHOBIUS); SSF55486 (SUPERFAMILY); TMhelix (TMHMM); TMhelix (TMHMM)                                                                                                                                                                                                                                    |

|     |                                                              |     |                                                   |     |           |        |        |                                                                                                                                                                                                                                                                                                                                                                                                                      |
|-----|--------------------------------------------------------------|-----|---------------------------------------------------|-----|-----------|--------|--------|----------------------------------------------------------------------------------------------------------------------------------------------------------------------------------------------------------------------------------------------------------------------------------------------------------------------------------------------------------------------------------------------------------------------|
| 237 | c123945_g1_i1_len_743_path_1_0_742_1                         | 14  | trehalase-like isoform x1                         | 248 | 1.77E-68  | 69.20% | 0.129  | IPR001661 (PRINTS); IPR001661 (PFAM); IPR001661 (PANTHER); PTHR23403:SF1 (PANTHER); IPR018232 (PROSITE_PATTERNS); IPR008928 (SUPERFAMILY)                                                                                                                                                                                                                                                                            |
| 238 | c123971_g1_i1_len_478_path_1_0_477_4                         | 12  | dual specificity testis-specific protein kinase 2 | 159 | 2.07E-78  | 84.90% | 0.103  | IPR001245 (PRINTS); G3DSA:1.10.510.10 (GENE3D); IPR001245 (PFAM); PTHR23257:SF324 (PANTHER); PTHR23257 (PANTHER); IPR008266 (PROSITE_PATTERNS); IPR000719 (PROSITE_PROFILES); IPR011009 (SUPERFAMILY)                                                                                                                                                                                                                |
| 239 | c123979_g1_i1_len_1227_path_1205_0_1226_1                    | 63  | protein twisted gastrulation                      | 409 | 1.27E-108 | 76.40% | 0.151  | IPR006761 (PFAM); IPR006761 (PANTHER); PTHR12312:SF15 (PANTHER); CYTOPLASMIC_DOMAIN (PHOBIUS); TRANSMEMBRANE (PHOBIUS); NON_CYTOPLASMIC_DOMAIN (PHOBIUS)                                                                                                                                                                                                                                                             |
| 240 | c124050_g1_i1_len_1382_path_1_0_1381_5                       | 132 | aael014742- partial                               | 460 | 3.09E-34  | 47.20% | 0.224  | IPR002110 (PRINTS); IPR002110 (SMART); IPR020683 (PFAM); IPR020683 (G3DSA:1.25.40.GENE3D); PTHR24198 (PANTHER); IPR002110 (PROSITE_PROFILES); IPR002110 (PROSITE_PROFILES); IPR002110 (PROSITE_PROFILES); IPR002110 (PROSITE_PROFILES); IPR002110 (PROSITE_PROFILES); IPR002110 (PROSITE_PROFILES); IPR020683 (SUPERFAMILY)                                                                                          |
| 241 | c12408_g1_i1_len_529_path_1_0_528_1                          | 9   | ---NA---                                          | 176 |           |        | 0.145  | IPR000421 (PFAM); IPR008979 (G3DSA:2.60.120.GENE3D); IPR000421 (PROSITE_PATTERNS); IPR000421 (PROSITE_PROFILES); IPR008979 (SUPERFAMILY)                                                                                                                                                                                                                                                                             |
| 242 | c124175_g1_i1_len_674_path_1_0_673_4                         | 26  | heat shock 70 kda protein 14-like                 | 225 | 1.90E-78  | 68.40% | 0.104  | G3DSA:3.30.420.40 (GENE3D); G3DSA:3.30.420.40 (GENE3D); IPR013126 (PFAM); G3DSA:3.90.640.10 (GENE3D); PTHR19375:SF158 (PANTHER); PTHR19375 (PANTHER); SSF53067 (SUPERFAMILY); SSF53067 (SUPERFAMILY)                                                                                                                                                                                                                 |
| 243 | c124181_g1_i1_len_454_path_1_0_453_0                         | 5   | protease inhibitor-like                           | 152 | 1.29E-15  | 67.70% | 0.585Y | IPR002223 (PRINTS); IPR002223 (SMART); IPR002223 (PFAM); IPR002223 (G3DSA:4.10.410.GENE3D); PTHR10083 (PANTHER); IPR020901 (PROSITE_PATTERNS); NON_CYTOPLASMIC_DOMAIN (PHOBIUS); SIGNAL_PEPTIDE_C_REGION (PHOBIUS); SIGNAL_PEPTIDE_N_REGION (PHOBIUS); SIGNAL_PEPTIDE (PHOBIUS); SIGNAL_PEPTIDE_H_REGION (PHOBIUS); IPR002223 (PROSITE_PROFILES); SignalP-TM (SIGNALP_EUK); IPR002223 (SUPERFAMILY); TMhelix (TMHMM) |
| 244 | c124343_g1_i1_len_1887_path_1_0_1886_2                       | 179 | leukotriene a-4 hydrolase                         | 629 | 0         | 73.70% | 0.125  | IPR014782 (PRINTS); IPR014782 (PFAM); G3DSA:1.10.390.10 (GENE3D); IPR012777 (TIGRFAM); IPR015211 (PFAM); PTHR11533:SF4 (PANTHER); IPR001930 (PANTHER); IPR016024 (SUPERFAMILY); SSF55486 (SUPERFAMILY); SSF63737 (SUPERFAMILY)                                                                                                                                                                                       |
| 245 | c124358_g1_i1_len_757_path_1_0_756_1                         | 53  | upf0669 protein c6orf120 homolog                  | 252 | 2.77E-37  | 64.00% | 0.107  | PTHR31703 (PANTHER)                                                                                                                                                                                                                                                                                                                                                                                                  |
| 246 | c124495_g1_i1_len_297_path_1_0_296_3                         | 5   | aael002876- partial                               | 99  | 7.59E-40  | 79.40% | 0.101  | IPR000859 (G3DSA:2.60.120.GENE3D); IPR000859 (PFAM); PTHR10127:SF557 (PANTHER); PTHR10127 (PANTHER); IPR000859 (PROSITE_PROFILES); IPR000859 (SUPERFAMILY)                                                                                                                                                                                                                                                           |
| 247 | c124561_g1_i1_len_402_path_1_0_200_1_201_401_1               | 4   | ankyrin domain partial                            | 134 | 1.31E-22  | 54.70% | 0.106  | IPR002110 (SMART); IPR020683 (G3DSA:1.25.40.GENE3D); IPR020683 (G3DSA:1.25.40.GENE3D); PF13637 (PFAM); IPR020683 (PFAM); PTHR24198 (PANTHER); IPR020683 (PROSITE_PROFILES); IPR002110 (PROSITE_PROFILES); IPR002110 (PROSITE_PROFILES); IPR020683 (SUPERFAMILY)                                                                                                                                                      |
| 248 | c124577_g1_i1_len_1118_path_1096_0_1117_1                    | 35  | secreted frizzled-related protein 3               | 373 | 6.98E-61  | 57.90% | 0.172  | Coil (COILS); IPR018933 (SMART); IPR020067 (SMART); G3DSA:2.40.50.120 (GENE3D); IPR020067 (PFAM); IPR018933 (PFAM); IPR020067 (G3DSA:1.10.2000.GENE3D); IPR015526 (PANTHER); PTHR11309:SF83 (PANTHER); IPR020067 (PROSITE_PROFILES); IPR001134 (PROSITE_PROFILES); IPR020067 (SUPERFAMILY); IPR008993 (SUPERFAMILY)                                                                                                  |
| 249 | c124595_g1_i1_len_598_path_1_0_597_4                         | 18  | sco- partial                                      | 199 | 1.41E-08  | 52.25% | 0.105  | IPR025155 (PFAM)                                                                                                                                                                                                                                                                                                                                                                                                     |
| 250 | c12482_g1_i1_len_674_path_652_0_94_747_95_103_756_104_673_2  | 18  | protein unc-45 homolog b                          | 224 | 1.10E-59  | 73.10% | 0.119  | IPR019734 (SMART); IPR013105 (PFAM); PF13414 (PFAM); IPR011990 (G3DSA:1.25.40.GENE3D); PTHR22904:SF302 (PANTHER); PTHR22904 (PANTHER); IPR019734 (PROSITE_PROFILES); IPR019734 (PROSITE_PROFILES); IPR019734 (PROSITE_PROFILES); IPR013026 (PROSITE_PROFILES); SSF48452 (SUPERFAMILY)                                                                                                                                |
| 251 | c12482_g1_i2_len_770_path_652_0_94_1454_95_199_756_200_769_2 | 14  | protein unc-45 homolog b                          | 256 | 1.88E-59  | 73.10% | 0.113  | IPR019734 (SMART); PF13414 (PFAM); IPR013105 (PFAM); IPR011990 (G3DSA:1.25.40.GENE3D); PTHR22904:SF302 (PANTHER); PTHR22904 (PANTHER); CYTOPLASMIC_DOMAIN (PHOBIUS); NON_CYTOPLASMIC_DOMAIN (PHOBIUS); TRANSMEMBRANE (PHOBIUS); IPR019734 (PROSITE_PROFILES); IPR019734 (PROSITE_PROFILES); IPR013026 (PROSITE_PROFILES); IPR019734 (PROSITE_PROFILES); SSF48452 (SUPERFAMILY); TMhelix (TMHMM)                      |

|     |                                                                             |      |                                                                       |     |           |        |         |                                                                                                                                                                                                                                                                                                                                                                                                                                              |
|-----|-----------------------------------------------------------------------------|------|-----------------------------------------------------------------------|-----|-----------|--------|---------|----------------------------------------------------------------------------------------------------------------------------------------------------------------------------------------------------------------------------------------------------------------------------------------------------------------------------------------------------------------------------------------------------------------------------------------------|
| 252 | c124960_g1_i1_len_1131_path_1_0_1130_5                                      | 33   | matrix metalloproteinase 9                                            | 377 | 7.83E-14  | 49.10% | 0.106   | IPR000562 (SMART); IPR000562 (PFAM); IPR000562 (G3DSA:2.10.10.GENE3D); IPR000562 (G3DSA:2.10.10.GENE3D); IPR000562 (PROSITE_PROFILES); IPR000562 (PROSITE_PROFILES); IPR013806 (SUPERFAMILY); IPR013806 (SUPERFAMILY)                                                                                                                                                                                                                        |
| 253 | c124966_g1_i1_len_879_path_857_0_878_0                                      | 62   | e3 ubiquitin-protein ligase mib2 isoform x1                           | 293 | 5.65E-141 | 77.70% | 0.1     | IPR002110 (PRINTS); IPR002110 (SMART); IPR020683 (G3DSA:1.25.40.GENE3D); IPR020683 (G3DSA:1.25.40.GENE3D); IPR020683 (PFAM); PTHR24202 (PANTHER); PTHR24202:SF4 (PANTHER); IPR002110 (PROSITE_PROFILES); IPR002110 (PROSITE_PROFILES); IPR002110 (PROSITE_PROFILES); IPR020683 (PROSITE_PROFILES); IPR020683 (SUPERFAMILY)                                                                                                                   |
| 254 | c125282_g1_i1_len_357_path_335_0_356_4                                      | 8    | egf-like module-containing mucin-like hormone receptor-like partial   | 119 | 2.09E-22  | 60.20% | 0.242   | IPR000832 (PFAM); PTHR12011:SF235 (PANTHER); PTHR12011 (PANTHER); TRANSMEMBRANE (PHOBIUS); CYTOPLASMIC_DOMAIN (PHOBIUS); NON_CYTOPLASMIC_DOMAIN (PHOBIUS); TRANSMEMBRANE (PHOBIUS); NON_CYTOPLASMIC_DOMAIN (PHOBIUS); TRANSMEMBRANE (PHOBIUS); CYTOPLASMIC_DOMAIN (PHOBIUS); IPR017981 (PROSITE_PROFILES); TMhelix (TMHMM); TMhelix (TMHMM); TMhelix (TMHMM)                                                                                 |
| 255 | c125283_g1_i1_len_271_path_249_0_270_1                                      | 4    | macrophage mannose receptor 1-like                                    | 90  | 1.68E-10  | 55.00% | 0.115   | IPR016186 (G3DSA:3.10.100.GENE3D); IPR001304 (PFAM); PTHR22803 (PANTHER); IPR001304 (PROSITE_PROFILES); IPR016187 (SUPERFAMILY)                                                                                                                                                                                                                                                                                                              |
| 256 | c125450_g1_i1_len_1093_path_1_0_1092_5                                      | 26   | attractin-like protein 1 isoform x1                                   | 364 | 3.35E-140 | 73.60% | 0.106   | IPR006652 (SMART); IPR000742 (SMART); IPR006652 (PFAM); IPR000859 (G3DSA:2.60.120.GENE3D); PF13418 (PFAM); IPR015916 (G3DSA:2.130.10.GENE3D); G3DSA:2.170.300.10 (GENE3D); IPR013111 (PFAM); PTHR10574 (PANTHER); PTHR10574:SF3 (PANTHER); IPR013032 (PROSITE_PATTERNS); IPR013032 (PROSITE_PATTERNS); IPR013032 (PROSITE_PATTERNS); IPR000742 (PROSITE_PROFILES); SSF117281 (SUPERFAMILY); IPR000859 (SUPERFAMILY)                          |
| 257 | c125508_g1_i1_len_1258_path_1236_0_1257_4                                   | 69   | carboxypeptidase b-like                                               | 419 | 3.21E-127 | 62.40% | 0.642 Y | IPR000834 (PRINTS); IPR000834 (SMART); IPR003146 (G3DSA:3.30.70.GENE3D); G3DSA:3.40.630.10 (GENE3D); IPR003146 (PFAM); IPR000834 (PFAM); PTHR11705 (PANTHER); IPR000834 (PROSITE_PATTERNS); NON_CYTOPLASMIC_DOMAIN (PHOBIUS); SIGNAL_PEPTIDE_N_REGION (PHOBIUS); SIGNAL_PEPTIDE (PHOBIUS); SIGNAL_PEPTIDE_H_REGION (PHOBIUS); SIGNAL_PEPTIDE_C_REGION (PHOBIUS); SignalP-noTM (SIGNALP_EUK); IPR009020 (SUPERFAMILY); SSF53187 (SUPERFAMILY) |
| 258 | c125515_g1_i1_len_415_path_1_0_414_0                                        | 6    | phosphoglycerate kinase                                               | 139 | 1.81E-38  | 66.30% | 0.11    | IPR001576 (PRINTS); IPR015901 (G3DSA:3.40.50.GENE3D); IPR001576 (PFAM); IPR001576 (PANTHER); PTHR11406:SF6 (PANTHER); IPR001576 (SUPERFAMILY)                                                                                                                                                                                                                                                                                                |
| 259 | c125609_g1_i1_len_364_path_342_0_363_1                                      | 12   | polypeptide n-acetylgalactosaminyltransferase 2-like                  | 121 | 8.46E-30  | 58.70% | 0.337   | PTHR11675:SF24 (PANTHER); PTHR11675 (PANTHER); NON_CYTOPLASMIC_DOMAIN (PHOBIUS); CYTOPLASMIC_DOMAIN (PHOBIUS); TRANSMEMBRANE (PHOBIUS); TMhelix (TMHMM)                                                                                                                                                                                                                                                                                      |
| 260 | c12563_g1_i1_len_572_path_825_0_322_114_8_323_433_50_434_571_2              | 22   | calponin homology domain containing                                   | 190 | 9.70E-59  | 66.20% | 0.146   | Coil (COILS); IPR025875 (PFAM); G3DSA:3.80.10.10 (GENE3D); PTHR23155 (PANTHER); PTHR23155:SF423 (PANTHER); IPR001611 (PROSITE_PROFILES); IPR001611 (PROSITE_PROFILES); IPR001611 (PROSITE_PROFILES); SSF52075 (SUPERFAMILY)                                                                                                                                                                                                                  |
| 261 | c12563_g1_i2_len_776_path_825_0_322_114_8_323_433_1258_434_637_50_638_775_2 | 36   | leucine-rich repeat and calponin homology domain-containing protein 1 | 258 | 1.30E-67  | 58.80% | 0.146   | Coil (COILS); IPR001611 (PFAM); G3DSA:3.80.10.10 (GENE3D); PTHR23155 (PANTHER); PTHR23155:SF423 (PANTHER); IPR001611 (PROSITE_PROFILES); IPR001611 (PROSITE_PROFILES); IPR001611 (PROSITE_PROFILES); SSF52075 (SUPERFAMILY)                                                                                                                                                                                                                  |
| 262 | c125789_g1_i1_len_567_path_1_0_566_2                                        | 12   | growth differentiation factor 8                                       | 189 | 5.14E-31  | 65.60% | 0.124   | IPR001111 (PFAM); IPR015616 (PTHR11848:PANTHER); IPR015615 (PANTHER)                                                                                                                                                                                                                                                                                                                                                                         |
| 263 | c126170_g1_i1_len_378_path_383_0_377_2                                      | 4553 | 60s acidic ribosomal protein p1                                       | 126 | 3.65E-31  | 93.40% | 0.131   | PF00428 (PFAM); PTHR21141 (PANTHER); IPR027534 (HAMAP)                                                                                                                                                                                                                                                                                                                                                                                       |
| 264 | c126295_g1_i1_len_372_path_1_0_371_2                                        | 6    | polyprotein precursor                                                 | 124 | 6.54E-19  | 54.80% | 0.102   | IPR000208 (PFAM); SSF56672 (SUPERFAMILY)                                                                                                                                                                                                                                                                                                                                                                                                     |
| 265 | c126328_g1_i1_len_680_path_1_0_679_4                                        | 25   | neuroendocrine convertase 2-like                                      | 227 | 6.97E-135 | 87.70% | 0.126   | IPR002884 (PFAM); IPR008979 (G3DSA:2.60.120.GENE3D); IPR000209 (G3DSA:3.40.50.GENE3D); PTHR10795:SF11 (PANTHER); IPR015500 (PANTHER); IPR000209 (SUPERFAMILY); IPR008979 (SUPERFAMILY)                                                                                                                                                                                                                                                       |
| 266 | c126361_g1_i1_len_343_path_321_0_342_0                                      | 10   | transmembrane protease serine partial                                 | 115 | 1.06E-19  | 68.40% | 0.147   | G3DSA:2.40.10.10 (GENE3D); IPR001254 (PFAM); PTHR24268:SF81 (PANTHER); PTHR24268 (PANTHER); IPR018114 (PROSITE_PATTERNS); IPR001254 (PROSITE_PROFILES); IPR009003 (SUPERFAMILY)                                                                                                                                                                                                                                                              |
| 267 | c126565_g1_i1_len_262_path_1_0_261_0                                        | 7    | matrix metalloproteinase-16 isoform x3                                | 88  | 1.12E-30  | 78.30% | 0.111   | IPR018487 (SMART); IPR018487 (PFAM); IPR000585 (G3DSA:2.110.10.GENE3D); PTHR10201 (PANTHER); PTHR10201:SF131 (PANTHER); IPR018487 (PROSITE_PROFILES); IPR018487 (PROSITE_PROFILES); IPR000585 (SUPERFAMILY)                                                                                                                                                                                                                                  |



[illegible]

|     |                                                       |     |                                                                                                                                                                           |     |          |        |        |                                                                                                                                                                                                                                                                                                                                                                                                                              |
|-----|-------------------------------------------------------|-----|---------------------------------------------------------------------------------------------------------------------------------------------------------------------------|-----|----------|--------|--------|------------------------------------------------------------------------------------------------------------------------------------------------------------------------------------------------------------------------------------------------------------------------------------------------------------------------------------------------------------------------------------------------------------------------------|
| 288 | c128120_g1_i1_len_305_path_1_0_304_1                  | 10  | isoform e                                                                                                                                                                 | 102 | 2.37E-07 | 57.00% | 0.238  | IPR002172 (SMART); IPR002172 (G3DSA:4.10.400.GENE3D); IPR002172 (PFAM); IPR002172 (PROSITE_PROFILES); IPR002172 (SUPERFAMILY)                                                                                                                                                                                                                                                                                                |
| 289 | c128203_g1_i1_len_281_path_259_0_280_0                | 4   | casin-1 isoform x9                                                                                                                                                        | 94  | 1.94E-22 | 73.00% | 0.104  | IPR020683 (PFAM); IPR020683 (G3DSA:1.25.40.GENE3D); IPR027013 (PANTHER); IPR027001 (PANTHER); IPR020683 (PROSITE_PROFILES); IPR002110 (PROSITE_PROFILES); IPR020683 (SUPERFAMILY)                                                                                                                                                                                                                                            |
| 291 | c12823_g1_i1_len_1062_path_1337_0_213_2_98_214_1061_2 | 101 | n-acetylglucosamine-1-phosphotransferase subunit gamma-like                                                                                                               | 354 | 4.35E-72 | 60.30% | 0.340Y | Coil (COILS); PF13015 (PFAM); IPR009011 (G3DSA:2.70.130.GENE3D); PTHR12630 (PANTHER); PTHR12630:SF6 (PANTHER); IPR009011 (SUPERFAMILY)                                                                                                                                                                                                                                                                                       |
| 292 | c12823_g1_i2_len_996_path_150_0_147_298_148_995_2     | 74  | n-acetylglucosamine-1-phosphotransferase subunit partial                                                                                                                  | 332 | 1.03E-68 | 61.80% | 0.137  | Coil (COILS); PF13015 (PFAM); IPR009011 (G3DSA:2.70.130.GENE3D); PTHR12630:SF6 (PANTHER); PTHR12630 (PANTHER); SignalP-TM (SIGNALP_GRAM_POSITIVE); IPR009011 (SUPERFAMILY)                                                                                                                                                                                                                                                   |
| 290 | c128233_g1_i1_len_336_path_314_0_335_1                | 10  | transient receptor potential cation channel subfamily a member 1 homolog                                                                                                  | 112 | 6.12E-20 | 60.20% | 0.128  | IPR002110 (PRINTS); IPR002110 (SMART); IPR020683 (G3DSA:1.25.40.GENE3D); IPR020683 (PFAM); IPR002110 (PFAM); PTHR24188 (PANTHER); IPR020683 (PROSITE_PROFILES); IPR002110 (PROSITE_PROFILES); IPR002110 (PROSITE_PROFILES); IPR020683 (SUPERFAMILY)                                                                                                                                                                          |
| 293 | c128407_g1_i1_len_516_path_494_0_515_1                | 11  | zinc finger protein 271 (zinc finger protein 7) (zinc finger protein znfphe133) (epstein-barr virus-induced zinc finger protein) (znf-eb) (ct-zfp48) (zinc finger protein | 172 | 1.43E-24 | 59.10% | 0.099  | IPR015880 (SMART); IPR013087 (G3DSA:3.30.160.GENE3D); PF13465 (PFAM); IPR013087 (G3DSA:3.30.160.GENE3D); PTHR24409 (PANTHER); IPR007087 (PROSITE_PATTERNS); IPR007087 (PROSITE_PATTERNS); IPR007087 (PROSITE_PATTERNS); IPR007087 (PROSITE_PATTERNS); IPR007087 (PROSITE_PROFILES); IPR007087 (PROSITE_PROFILES); IPR007087 (PROSITE_PROFILES); IPR007087 (PROSITE_PROFILES); SSF57667 (SUPERFAMILY); SSF57667 (SUPERFAMILY) |
| 294 | c128413_g1_i1_len_381_path_1_0_380_2                  | 8   | collagen alpha chain cg42342 isoform x1                                                                                                                                   | 127 | 5.78E-22 | 80.00% | 0.114  | IPR008160 (PFAM); PTHR24023 (PANTHER); PTHR24023:SF379 (PANTHER)                                                                                                                                                                                                                                                                                                                                                             |
| 295 | c128413_g1_i1_len_381_path_1_0_380_5                  | 8   | collagen-like partial                                                                                                                                                     | 127 | 2.82E-17 | 54.30% | 0.136  | no IPS match                                                                                                                                                                                                                                                                                                                                                                                                                 |
| 296 | c128425_g1_i1_len_308_path_286_0_307_0                | 6   | PREDICTED: uncharacterized protein C4orf29 homolog isoform X5                                                                                                             | 103 | 5.43E-40 | 81.20% | 0.147  | IPR019149 (PFAM); PTHR13617 (PANTHER)                                                                                                                                                                                                                                                                                                                                                                                        |
| 297 | c128496_g1_i1_len_392_path_370_0_391_1                | 8   | hemiscitin- partial                                                                                                                                                       | 131 | 5.54E-11 | 56.50% | 0.191  | IPR000884 (SMART); G3DSA:2.20.100.10 (GENE3D); IPR000884 (PFAM); PTHR19897 (PANTHER); NON_CYTOPLASMIC_DOMAIN (PHOBIOUS); TRANSMEMBRANE (PHOBIOUS); CYTOPLASMIC_DOMAIN (PHOBIOUS); IPR000884 (PROSITE_PROFILES); IPR000884 (SUPERFAMILY); TMhelix (TMHMM)                                                                                                                                                                     |
| 298 | c128508_g1_i1_len_1004_path_1_0_1003_5                | 42  | hypothetical protein LOTGIDRAFT_71188, partial                                                                                                                            | 334 | 5.02E-85 | 58.50% | 0.243  | IPR000859 (SMART); IPR000859 (G3DSA:2.60.120.GENE3D); IPR000859 (G3DSA:2.60.120.GENE3D); IPR000859 (PFAM); PTHR10127 (PANTHER); IPR028876 (PTHR10127:PANTHER); IPR000859 (PROSITE_PROFILES); IPR000859 (PROSITE_PROFILES); IPR000859 (PROSITE_PROFILES); IPR000859 (SUPERFAMILY); IPR000859 (SUPERFAMILY); IPR000859 (SUPERFAMILY)                                                                                           |
| 299 | c128528_g1_i1_len_323_path_301_0_322_2                | 4   | von willebrand factor type egf and pentraxin domain-containing protein 1                                                                                                  | 107 | 1.06E-10 | 61.50% | 0.105  | IPR000436 (SMART); G3DSA:2.10.70.10 (GENE3D); IPR000436 (PFAM); PTHR19325 (PANTHER); IPR000436 (PROSITE_PROFILES); IPR000436 (SUPERFAMILY)                                                                                                                                                                                                                                                                                   |
| 300 | c128649_g1_i1_len_274_path_252_0_273_2                | 4   | very low-density lipoprotein receptor                                                                                                                                     | 91  | 2.01E-21 | 63.20% | 0.106  | IPR002172 (PRINTS); IPR002172 (SMART); IPR002172 (G3DSA:4.10.400.GENE3D); G3DSA:4.10.1220.10 (GENE3D); IPR002172 (PFAM); PTHR10529 (PANTHER); PTHR10529:SF204 (PANTHER); IPR023415 (PROSITE_PATTERNS); IPR002172 (PROSITE_PROFILES); IPR002172 (SUPERFAMILY)                                                                                                                                                                 |
| 301 | c12871_g1_i1_len_143_path_1_0_142_2                   | 1   | rap guanine nucleotide exchange factor 2                                                                                                                                  | 47  | 3.07E-21 | 95.20% | 0.108  | IPR001478 (PFAM); IPR001478 (G3DSA:2.30.42.GENE3D); PTHR23113 (PANTHER); PTHR23113:SF198 (PANTHER); IPR001478 (PROSITE_PROFILES); IPR001478 (SUPERFAMILY)                                                                                                                                                                                                                                                                    |
| 302 | c129003_g1_i1_len_479_path_457_0_478_1                | 7   | tectonic-like protein                                                                                                                                                     | 160 | 2.04E-38 | 63.70% | 0.174  | PTHR14611 (PANTHER); PTHR14611:SF0 (PANTHER)                                                                                                                                                                                                                                                                                                                                                                                 |
| 303 | c129146_g1_i1_len_819_path_1_0_818_5                  | 34  | zinc finger protein 676-like                                                                                                                                              | 273 | 3.85E-39 | 67.60% | 0.11   | IPR015880 (SMART); PF13465 (PFAM); IPR007087 (PFAM); IPR013087 (G3DSA:3.30.160.GENE3D); IPR013087 (G3DSA:3.30.160.GENE3D); PTHR24409 (PANTHER); IPR007087 (PROSITE_PATTERNS); IPR007087 (PROSITE_PATTERNS); IPR007087 (PROSITE_PROFILES); IPR007087 (PROSITE_PROFILES); SSF57667 (SUPERFAMILY)                                                                                                                               |
| 304 | c129363_g1_i1_len_404_path_382_0_403_1                | 6   | very low-density lipoprotein receptor                                                                                                                                     | 135 | 3.35E-09 | 66.90% | 0.112  | IPR002172 (SMART); IPR002172 (G3DSA:4.10.400.GENE3D); IPR002172 (PFAM); IPR023415 (PROSITE_PATTERNS); IPR002172 (PROSITE_PROFILES); IPR002172 (SUPERFAMILY)                                                                                                                                                                                                                                                                  |
| 305 | c129448_g1_i1_len_312_path_1_0_311_5                  | 6   | core histone macro-                                                                                                                                                       | 104 | 1.04E-37 | 85.90% | 0.25   | IPR002119 (PRINTS); IPR002119 (SMART); IPR009072 (G3DSA:1.10.20.GENE3D); IPR007125 (PFAM); PTHR23430:SF33 (PANTHER); PTHR23430 (PANTHER); IPR009072 (SUPERFAMILY)                                                                                                                                                                                                                                                            |

|     |                                           |     |                                                                                                                                                                                |     |           |        |       |                                                                                                                                                                                                                                                                                                                                                                             |
|-----|-------------------------------------------|-----|--------------------------------------------------------------------------------------------------------------------------------------------------------------------------------|-----|-----------|--------|-------|-----------------------------------------------------------------------------------------------------------------------------------------------------------------------------------------------------------------------------------------------------------------------------------------------------------------------------------------------------------------------------|
| 306 | c129612_g1_i1_len_392_path_1_0_391_5      | 8   | 3-ketodihydrosphingosine reductase                                                                                                                                             | 130 | 8.10E-13  | 70.60% | 0.242 | IPR016040 (G3DSA:3.40.50.GENE3D); IPR002198 (PFAM); PTHR24320 (PANTHER); CYTOPLASMIC_DOMAIN (PHOBIUS); TRANSMEMBRANE (PHOBIUS); NON_CYTOPLASMIC_DOMAIN (PHOBIUS); TRANSMEMBRANE (PHOBIUS); NON_CYTOPLASMIC_DOMAIN (PHOBIUS); SSF51735 (SUPERFAMILY); TMhelix (TMHMM)                                                                                                        |
| 307 | c129673_g1_i1_len_385_path_1_0_384_5      | 5   | gamma-glutamyltranspeptidase 1                                                                                                                                                 | 128 | 3.68E-38  | 65.00% | 0.101 | IPR000101 (PRINTS); IPR000101 (PFAM); IPR000101 (PANTHER); PTHR11686:SF15 (PANTHER); IPR029055 (SUPERFAMILY)                                                                                                                                                                                                                                                                |
| 308 | c129682_g1_i1_len_482_path_460_0_481_1    | 7   | lysosomal pro-x carboxypeptidase                                                                                                                                               | 161 | 2.69E-66  | 72.60% | 0.132 | IPR008758 (PFAM); IPR008758 (PANTHER); PTHR11010:SF11 (PANTHER)                                                                                                                                                                                                                                                                                                             |
| 309 | c129762_g1_i1_len_377_path_1_0_376_1      | 14  | basement membrane-specific heparan sulfate proteoglycan core protein                                                                                                           | 126 | 1.22E-33  | 66.00% | 0.122 | IPR018031 (SMART); IPR000034 (PFAM); PTHR10574 (PANTHER); PTHR10574:SF252 (PANTHER); IPR000034 (PROSITE_PROFILES)                                                                                                                                                                                                                                                           |
| 310 | c13003_g1_i1_len_396_path_584_0_395_2     | 9   | serine protease easter                                                                                                                                                         | 132 | 5.30E-23  | 60.20% | 0.119 | IPR001254 (SMART); IPR001254 (PFAM); G3DSA:2.40.10.10 (GENE3D); PTHR24260 (PANTHER); IPR018114 (PROSITE_PATTERNS); IPR001254 (PROSITE_PROFILES); IPR009003 (SUPERFAMILY)                                                                                                                                                                                                    |
| 311 | c130255_g1_i1_len_1089_path_1067_0_1088_1 | 142 | prohormone-1-like                                                                                                                                                              | 363 | 7.69E-30  | 77.80% | 0.151 | CYTOPLASMIC_DOMAIN (PHOBIUS); NON_CYTOPLASMIC_DOMAIN (PHOBIUS); TRANSMEMBRANE (PHOBIUS); TMhelix (TMHMM)                                                                                                                                                                                                                                                                    |
| 312 | c130283_g1_i1_len_301_path_279_0_300_0    | 7   | protein flightless-1                                                                                                                                                           | 101 | 4.46E-46  | 88.00% | 0.165 | IPR029006 (G3DSA:3.40.20.GENE3D); IPR007123 (PFAM); IPR007122 (PANTHER); IPR029919 (PTHR11977:PANTHER); SSF55753 (SUPERFAMILY)                                                                                                                                                                                                                                              |
| 313 | c130460_g1_i1_len_436_path_1_0_435_5      | 10  | trehalase isoform x1                                                                                                                                                           | 145 | 7.41E-28  | 68.40% | 0.196 | IPR001661 (PFAM); IPR001661 (PANTHER); PTHR23403:SF1 (PANTHER); IPR008928 (SUPERFAMILY)                                                                                                                                                                                                                                                                                     |
| 314 | c130728_g1_i1_len_659_path_637_0_658_5    | 19  | leucine-rich repeat protein soc-2 homolog                                                                                                                                      | 219 | 4.40E-130 | 93.70% | 0.111 | IPR003591 (SMART); IPR025875 (PFAM); G3DSA:3.80.10.10 (GENE3D); G3DSA:3.80.10.10 (GENE3D); IPR001611 (PFAM); IPR027036 (PTHR23155:PANTHER); PTHR23155 (PANTHER); IPR001611 (PROSITE_PROFILES); IPR001611 (PROSITE_PROFILES); IPR001611 (PROSITE_PROFILES); IPR001611 (PROSITE_PROFILES); IPR001611 (PROSITE_PROFILES); IPR001611 (PROSITE_PROFILES); SSF52058 (SUPERFAMILY) |
| 315 | c130729_g1_i1_len_468_path_446_0_467_0    | 10  | kunitz and ntr domain-containing protein 2                                                                                                                                     | 156 | 1.42E-49  | 89.00% | 0.13  | IPR003598 (SMART); IPR013098 (PFAM); IPR013783 (G3DSA:2.60.40.GENE3D); NON_CYTOPLASMIC_DOMAIN (PHOBIUS); CYTOPLASMIC_DOMAIN (PHOBIUS); TRANSMEMBRANE (PHOBIUS); IPR007110 (PROSITE_PROFILES); SSF48726 (SUPERFAMILY); TMhelix (TMHMM)                                                                                                                                       |
| 316 | c130789_g1_i1_len_265_path_1_0_264_4      | 4   | neurotactin                                                                                                                                                                    | 88  | 4.73E-28  | 76.20% | 0.147 | IPR029058 (G3DSA:3.40.50.GENE3D); IPR002018 (PFAM); PTHR11559 (PANTHER); PTHR11559:SF140 (PANTHER); IPR029058 (SUPERFAMILY)                                                                                                                                                                                                                                                 |
| 317 | c130830_g1_i1_len_310_path_1_0_309_5      | 7   | #NAME?                                                                                                                                                                         | 103 | 9.23E-49  | 91.60% | 0.126 | G3DSA:3.40.50.2000 (GENE3D); IPR001830 (PFAM); PTHR10788 (PANTHER); PTHR10788:SF6 (PANTHER); SSF53756 (SUPERFAMILY)                                                                                                                                                                                                                                                         |
| 318 | c13094_g2_i1_len_146_path_354_0_145_2     | 1   | multiple epidermal growth factor-like domains protein 8                                                                                                                        | 48  | 3.11E-14  | 92.30% | 0.151 | TRANSMEMBRANE (PHOBIUS); NON_CYTOPLASMIC_DOMAIN (PHOBIUS); CYTOPLASMIC_DOMAIN (PHOBIUS); TMhelix (TMHMM)                                                                                                                                                                                                                                                                    |
| 319 | c130993_g1_i1_len_483_path_1_0_482_3      | 13  | mlrp1_acrmi ame: full=mam and ldl-receptor class a domain-containing protein 1 ame: full=skeletal organic matrix mam and ldl-receptor 1 short=som mam and ldl-receptor partial | 161 | 3.04E-16  | 64.20% | 0.31  | IPR000998 (PFAM); PTHR23282:SF75 (PANTHER); PTHR23282 (PANTHER); CYTOPLASMIC_DOMAIN (PHOBIUS); TRANSMEMBRANE (PHOBIUS); CYTOPLASMIC_DOMAIN (PHOBIUS); NON_CYTOPLASMIC_DOMAIN (PHOBIUS); TRANSMEMBRANE (PHOBIUS); IPR000998 (PROSITE_PROFILES); IPR000998 (PROSITE_PROFILES); IPR013320 (SUPERFAMILY); TMhelix (TMHMM); TMhelix (TMHMM)                                      |
| 320 | c131137_g1_i1_len_359_path_337_0_358_5    | 7   | angiopoietin-related protein 1                                                                                                                                                 | 119 | 1.46E-26  | 71.10% | 0.125 | IPR014715 (G3DSA:4.10.530.GENE3D); IPR002181 (PFAM); PTHR19143 (PANTHER); IPR020837 (PROSITE_PATTERNS); IPR002181 (PROSITE_PROFILES); IPR002181 (SUPERFAMILY)                                                                                                                                                                                                               |
| 321 | c131300_g1_i1_len_357_path_1_0_356_1      | 6   | insulin-like growth factor-binding protein complex acid labile chain                                                                                                           | 119 | 6.83E-30  | 63.10% | 0.102 | IPR003591 (SMART); G3DSA:3.80.10.10 (GENE3D); IPR001611 (PFAM); PTHR24369 (PANTHER); SSF52058 (SUPERFAMILY)                                                                                                                                                                                                                                                                 |
| 322 | c131397_g1_i1_len_311_path_1_0_310_4      | 7   | receptor tyrosine phosphatase type r2a                                                                                                                                         | 104 | 1.51E-38  | 80.10% | 0.115 | IPR003599 (SMART); IPR003598 (SMART); IPR013098 (PFAM); IPR013783 (G3DSA:2.60.40.GENE3D); PTHR19134 (PANTHER); PTHR19134:SF199 (PANTHER); IPR007110 (PROSITE_PROFILES); SSF48726 (SUPERFAMILY)                                                                                                                                                                              |
| 325 | c1314_g1_i1_len_151_path_343_0_150_5      | 3   | isoform b                                                                                                                                                                      | 50  | 5.36E-21  | 92.20% | 0.097 | IPR001245 (PFAM); G3DSA:3.30.200.20 (GENE3D); PTHR24418:SF0 (PANTHER); PTHR24418 (PANTHER); IPR000719 (PROSITE_PROFILES); IPR011009 (SUPERFAMILY)                                                                                                                                                                                                                           |
| 323 | c131460_g1_i1_len_336_path_1_0_335_2      | 3   | low quality protein: de-cadherin                                                                                                                                               | 112 | 1.42E-22  | 61.20% | 0.205 | Coil (COILS); IPR000233 (PFAM); PTHR24027:SF251 (PANTHER); PTHR24027 (PANTHER); NON_CYTOPLASMIC_DOMAIN (PHOBIUS); CYTOPLASMIC_DOMAIN (PHOBIUS); TRANSMEMBRANE (PHOBIUS); TMhelix (TMHMM)                                                                                                                                                                                    |
| 324 | c131483_g1_i1_len_582_path_560_0_581_1    | 9   | limbic system-associated membrane protein                                                                                                                                      | 194 | 3.65E-81  | 81.40% | 0.099 | IPR003598 (SMART); IPR003599 (SMART); IPR013783 (G3DSA:2.60.40.GENE3D); IPR013098 (PFAM); PF13895 (PFAM); PTHR23279 (PANTHER); IPR007110 (PROSITE_PROFILES); SSF48726 (SUPERFAMILY); SSF48726 (SUPERFAMILY); TMhelix (TMHMM)                                                                                                                                                |

|     |                                        |    |                                                                                   |     |           |        |        |                                                                                                                                                                                                                                                                                                                                                                                                                                                                                                   |
|-----|----------------------------------------|----|-----------------------------------------------------------------------------------|-----|-----------|--------|--------|---------------------------------------------------------------------------------------------------------------------------------------------------------------------------------------------------------------------------------------------------------------------------------------------------------------------------------------------------------------------------------------------------------------------------------------------------------------------------------------------------|
| 326 | c13168_g1_i1_len_638_path_616_0_637_0  | 49 | alpha-mannosidase partial                                                         | 213 | 1.55E-110 | 81.30% | 0.102  | IPR000602 (PFAM); IPR027291 (G3DSA:3.20.110.GENE3D); IPR015341 (G3DSA:1.20.1270.GENE3D); PTHR11607 (PANTHER); PTHR11607:SF4 (PANTHER); IPR011330 (SUPERFAMILY)                                                                                                                                                                                                                                                                                                                                    |
| 327 | c131734_g1_i1_len_781_path_1_0_780_3   | 18 | fasciclin- partial                                                                | 261 | 3.56E-30  | 47.40% | 0.102  | IPR003599 (SMART); IPR003598 (SMART); IPR013783 (G3DSA:2.60.40.GENE3D); IPR013783 (G3DSA:2.60.40.GENE3D); IPR013098 (PFAM); IPR013783 (G3DSA:2.60.40.GENE3D); PTHR10489 (PANTHER); IPR007110 (PROSITE_PROFILES); IPR007110 (PROSITE_PROFILES); IPR007110 (PROSITE_PROFILES); SSF48726 (SUPERFAMILY); SSF48726 (SUPERFAMILY)                                                                                                                                                                       |
| 328 | c131753_g1_i1_len_343_path_321_0_342_1 | 3  | low quality protein: basement membrane-specific heparan sulfate proteoglycan core | 114 | 2.17E-16  | 64.90% | 0.420Y | IPR002172 (PRINTS); IPR002172 (SMART); IPR002172 (G3DSA:4.10.400.GENE3D); IPR002172 (G3DSA:4.10.400.GENE3D); IPR002172 (PFAM); PTHR10529 (PANTHER); IPR023415 (PROSITE_PATTERNS); IPR023415 (PROSITE_PATTERNS); NON_CYTOPLASMIC_DOMAIN (PHOBIUS); SIGNAL_PEPTIDE_H_REGION (PHOBIUS); SIGNAL_PEPTIDE (PHOBIUS); SIGNAL_PEPTIDE_C_REGION (PHOBIUS); SIGNAL_PEPTIDE_N_REGION (PHOBIUS); IPR002172 (PROSITE_PROFILES); IPR002172 (PROSITE_PROFILES); IPR002172 (SUPERFAMILY); IPR002172 (SUPERFAMILY) |
| 329 | c131783_g1_i1_len_293_path_271_0_292_1 | 2  | lysosomal pro-x carboxypeptidase                                                  | 98  | 1.73E-42  | 79.40% | 0.152  | IPR008758 (PFAM); IPR029058 (G3DSA:3.40.50.GENE3D); PTHR11010:SF11 (PANTHER); IPR008758 (PANTHER); IPR029058 (SUPERFAMILY)                                                                                                                                                                                                                                                                                                                                                                        |
| 330 | c131936_g1_i1_len_265_path_1_0_264_5   | 4  | sortilin-related receptor                                                         | 88  | 3.48E-08  | 49.90% | 0.122  | IPR002172 (PRINTS); IPR002172 (SMART); IPR002172 (G3DSA:4.10.400.GENE3D); PTHR10529 (PANTHER); IPR002172 (PROSITE_PROFILES); IPR002172 (SUPERFAMILY); IPR002172 (SUPERFAMILY)                                                                                                                                                                                                                                                                                                                     |
| 331 | c131982_g1_i1_len_750_path_728_0_749_4 | 35 | aldehyde dehydrogenase family 9 member a1-b-like                                  | 250 | 1.72E-111 | 78.80% | 0.112  | IPR016163 (G3DSA:3.40.309.GENE3D); IPR016162 (G3DSA:3.40.605.GENE3D); IPR015590 (PFAM); PTHR11699 (PANTHER); PTHR11699:SF114 (PANTHER); IPR016160 (PROSITE_PATTERNS); IPR029510 (PROSITE_PATTERNS); IPR016161 (SUPERFAMILY)                                                                                                                                                                                                                                                                       |
| 332 | c132012_g1_i1_len_346_path_1_0_345_1   | 10 | discoidin domain-containing receptor partial                                      | 115 | 1.07E-47  | 79.40% | 0.107  | IPR020635 (SMART); IPR001245 (PFAM); G3DSA:1.10.510.10 (GENE3D); PTHR24416 (PANTHER); PTHR24416:SF210 (PANTHER); IPR000719 (PROSITE_PROFILES); IPR011009 (SUPERFAMILY)                                                                                                                                                                                                                                                                                                                            |
| 333 | c132014_g1_i1_len_389_path_1_0_388_5   | 5  | four-jointed box protein 1-like                                                   | 129 | 4.58E-59  | 79.40% | 0.101  | IPR024868 (PRINTS); IPR024868 (PANTHER); PTHR13147:SF5 (PANTHER)                                                                                                                                                                                                                                                                                                                                                                                                                                  |
| 334 | c132073_g1_i1_len_285_path_1_0_284_1   | 4  | mucin-19 isoform x2                                                               | 95  | 5.04E-08  | 60.00% | 0.146  | IPR001846 (PFAM); IPR001846 (PROSITE_PROFILES)                                                                                                                                                                                                                                                                                                                                                                                                                                                    |
| 335 | c132540_g1_i1_len_353_path_331_0_352_2 | 4  | gastrula zinc finger protein                                                      | 117 | 4.30E-15  | 58.50% | 0.105  | IPR015880 (SMART); PF13465 (PFAM); IPR013087 (G3DSA:3.30.160.GENE3D); IPR013087 (G3DSA:3.30.160.GENE3D); PTHR24409 (PANTHER); PTHR24409:SF14 (PANTHER); IPR007087 (PROSITE_PATTERNS); IPR007087 (PROSITE_PATTERNS); IPR007087 (PROSITE_PROFILES); IPR007087 (PROSITE_PROFILES); SSF57667 (SUPERFAMILY); SSF57667 (SUPERFAMILY)                                                                                                                                                                    |
| 336 | c132579_g1_i1_len_295_path_1_0_294_3   | 2  | beta- -galactosyltransferase 1-like                                               | 99  | 8.40E-33  | 77.00% | 0.112  | IPR029044 (G3DSA:3.90.550.GENE3D); IPR027995 (PFAM); IPR003859 (PANTHER); IPR029044 (SUPERFAMILY)                                                                                                                                                                                                                                                                                                                                                                                                 |
| 338 | c1326_g1_i1_len_881_path_2725_0_880_3  | 35 | peroxidasin homolog                                                               | 294 | 2.62E-29  | 47.40% | 0.125  | IPR019791 (PRINTS); IPR019791 (PFAM); IPR019791 (G3DSA:1.10.640.GENE3D); PTHR11475 (PANTHER); IPR019791 (PROSITE_PROFILES); IPR010255 (SUPERFAMILY)                                                                                                                                                                                                                                                                                                                                               |
| 337 | c132639_g1_i1_len_606_path_584_0_605_3 | 10 | dlp hdl-bgbp precursor                                                            | 202 | 9.12E-64  | 71.80% | 0.098  | IPR015817 (G3DSA:2.20.50.GENE3D); IPR001747 (PFAM); IPR015255 (PFAM); IPR011030 (G3DSA:1.25.10.GENE3D); PTHR23345:SF11 (PANTHER); PTHR23345 (PANTHER); IPR015819 (SUPERFAMILY); IPR011030 (SUPERFAMILY)                                                                                                                                                                                                                                                                                           |
| 339 | c132822_g1_i1_len_355_path_1_0_354_4   | 7  | Agrin, partial                                                                    | 118 | 2.69E-19  | 62.10% | 0.143  | IPR013320 (G3DSA:2.60.120.GENE3D); IPR001791 (PFAM); PTHR10574 (PANTHER); IPR001791 (PROSITE_PROFILES); IPR013320 (SUPERFAMILY)                                                                                                                                                                                                                                                                                                                                                                   |
| 340 | c132862_g1_i1_len_388_path_366_0_387_0 | 6  | neural- partial                                                                   | 130 | 1.73E-37  | 61.00% | 0.106  | G3DSA:2.170.300.10 (GENE3D); IPR000742 (PFAM); IPR013320 (G3DSA:2.60.120.GENE3D); IPR013032 (PROSITE_PATTERNS); IPR013032 (PROSITE_PATTERNS); IPR000742 (PROSITE_PROFILES); IPR013320 (SUPERFAMILY); SSF57196 (SUPERFAMILY)                                                                                                                                                                                                                                                                       |
| 341 | c133015_g1_i1_len_251_path_229_0_250_5 | 3  | low quality protein: coagulation factor vii                                       | 83  | 5.44E-06  | 54.00% | 0.121  | IPR001254 (PFAM); G3DSA:2.40.10.10 (GENE3D); IPR018114 (PROSITE_PATTERNS); IPR009003 (SUPERFAMILY)                                                                                                                                                                                                                                                                                                                                                                                                |
| 342 | c133040_g1_i1_len_259_path_1_0_258_4   | 4  | glucose dehydrogenase                                                             | 86  | 7.34E-22  | 68.40% | 0.112  | G3DSA:3.50.50.60 (GENE3D); IPR000172 (PFAM); PTHR11552:SF77 (PANTHER); PTHR11552 (PANTHER); SSF51905 (SUPERFAMILY)                                                                                                                                                                                                                                                                                                                                                                                |
| 343 | c133072_g1_i1_len_372_path_350_0_371_1 | 8  | hypothetical protein L798_10748                                                   | 124 | 2.82E-23  | 60.40% | 0.165  | IPR007074 (PFAM); PTHR13627:SF24 (PANTHER); PTHR13627 (PANTHER)                                                                                                                                                                                                                                                                                                                                                                                                                                   |
| 344 | c133269_g1_i1_len_382_path_360_0_381_1 | 13 | oocyte zinc finger protein 26-like isoform x2                                     | 127 | 1.61E-10  | 67.40% | 0.112  | IPR015880 (SMART); IPR013087 (G3DSA:3.30.160.GENE3D); IPR013087 (G3DSA:3.30.160.GENE3D); PF13465 (PFAM); PTHR24409 (PANTHER); IPR007087 (PROSITE_PATTERNS); IPR007087 (PROSITE_PROFILES); SSF57667 (SUPERFAMILY)                                                                                                                                                                                                                                                                                  |
| 345 | c133478_g1_i1_len_382_path_1_0_381_5   | 6  | mucin-19 isoform x1                                                               | 127 | 4.22E-09  | 46.20% | 0.125  | IPR001846 (PFAM); PTHR11339 (PANTHER); IPR001846 (PROSITE_PROFILES)                                                                                                                                                                                                                                                                                                                                                                                                                               |



|     |                                         |      |                                                                              |     |          |        |       |                                                                                                                                                                                                                                                                                                                                                                                                                                                                                                                                                                                                                                        |
|-----|-----------------------------------------|------|------------------------------------------------------------------------------|-----|----------|--------|-------|----------------------------------------------------------------------------------------------------------------------------------------------------------------------------------------------------------------------------------------------------------------------------------------------------------------------------------------------------------------------------------------------------------------------------------------------------------------------------------------------------------------------------------------------------------------------------------------------------------------------------------------|
| 346 | c133538_g1_i1_len_293_path_1_0_292_0    | 4    | fmrfaide-related neuropeptides                                               | 98  | 2.01E-08 | 70.80% | 0.143 | TRANSMEMBRANE (PHOBIUS); NON_CYTOPLASMIC_DOMAIN (PHOBIUS); CYTOPLASMIC_DOMAIN (PHOBIUS); TMhelix (TMHMM)                                                                                                                                                                                                                                                                                                                                                                                                                                                                                                                               |
| 347 | c133563_g1_i1_len_234_path_212_0_233_4  | 3    | glucose dehydrogenase                                                        | 78  | 1.92E-18 | 88.00% | 0.127 | G3DSA:3.50.50.60 (GENE3D); IPR007867 (PFAM); PTHR11552:SF90 (PANTHER); PTHR11552 (PANTHER); SSF51905 (SUPERFAMILY)                                                                                                                                                                                                                                                                                                                                                                                                                                                                                                                     |
| 348 | c133596_g1_i1_len_257_path_1_0_256_4    | 4    | transforming growth factor-beta-induced protein ig-h3                        | 86  | 6.64E-28 | 63.80% | 0.104 | IPR000782 (G3DSA:2.30.180.GENE3D); IPR000782 (PFAM); PTHR10900 (PANTHER); IPR000782 (PROSITE_PROFILES); IPR000782 (SUPERFAMILY)                                                                                                                                                                                                                                                                                                                                                                                                                                                                                                        |
| 349 | c133652_g1_i1_len_286_path_264_0_285_2  | 9    | alpha- -mannosyl-glycoprotein 4-beta-n-acetylglucosaminyltransferase partial | 95  | 4.38E-24 | 63.10% | 0.149 | IPR006759 (PFAM); IPR006759 (PANTHER); PTHR12062:SF0 (PANTHER)                                                                                                                                                                                                                                                                                                                                                                                                                                                                                                                                                                         |
| 350 | c133657_g1_i1_len_744_path_722_0_743_3  | 11   | polypeptide n-acetylgalactosaminyltransferase 14                             | 248 | 1.47E-97 | 76.80% | 0.105 | IPR029044 (G3DSA:3.90.550.GENE3D); IPR001173 (PFAM); PTHR11675 (PANTHER); IPR029044 (SUPERFAMILY)                                                                                                                                                                                                                                                                                                                                                                                                                                                                                                                                      |
| 351 | c133671_g1_i1_len_393_path_1_0_392_5    | 6    | serine proteinase stubble-like                                               | 131 | 2.63E-07 | 71.40% | 0.115 | G3DSA:2.40.10.10 (GENE3D); IPR001254 (PFAM); PTHR24268:SF94 (PANTHER); PTHR24268 (PANTHER); IPR009003 (SUPERFAMILY)                                                                                                                                                                                                                                                                                                                                                                                                                                                                                                                    |
| 352 | c133697_g1_i1_len_333_path_311_0_332_1  | 4    | signal cub and egf-like domain-containing protein 1 isoform x1               | 111 | 4.26E-27 | 81.00% | 0.112 | PTHR24046:SF4 (PANTHER); PTHR24046 (PANTHER)                                                                                                                                                                                                                                                                                                                                                                                                                                                                                                                                                                                           |
| 353 | c134148_g1_i1_len_562_path_540_0_561_0  | 25   | isoform b                                                                    | 188 | 1.21E-11 | 62.60% | 0.115 | G3DSA:2.40.10.10 (GENE3D); IPR001254 (PFAM); PTHR24268:SF94 (PANTHER); PTHR24268 (PANTHER); IPR018114 (PROSITE_PATTERNS); IPR009003 (SUPERFAMILY)                                                                                                                                                                                                                                                                                                                                                                                                                                                                                      |
| 354 | c134556_g1_i1_len_345_path_323_0_344_1  | 4    | laminin subunit beta-1 isoform x1                                            | 115 | 2.03E-32 | 71.30% | 0.102 | Coil (COILS); Coil (COILS); G3DSA:1.20.58.60 (GENE3D); SSF46966 (SUPERFAMILY)                                                                                                                                                                                                                                                                                                                                                                                                                                                                                                                                                          |
| 355 | c134572_g1_i1_len_479_path_1_0_478_0    | 8    | a disintegrin and metalloproteinase with thrombospondin motifs 14            | 160 | 6.56E-15 | 53.40% | 0.096 | IPR002870 (PFAM); PTHR13723 (PANTHER); PTHR13723:SF153 (PANTHER)                                                                                                                                                                                                                                                                                                                                                                                                                                                                                                                                                                       |
| 356 | c13471_g2_i1_len_535_path_255_0_534_0   | 38   | cyclin-g-associated kinase                                                   | 179 | 2.70E-69 | 78.80% | 0.105 | IPR029021 (G3DSA:3.90.190.GENE3D); IPR000340 (PFAM); PTHR23172:SF19 (PANTHER); PTHR23172 (PANTHER); IPR014020 (PROSITE_PROFILES); IPR029023 (PROSITE_PROFILES); IPR029021 (SUPERFAMILY)                                                                                                                                                                                                                                                                                                                                                                                                                                                |
| 357 | c134735_g1_i1_len_383_path_1_0_382_0    | 10   | chloride calcium family member 3                                             | 128 | 1.86E-12 | 63.60% | 0.322 | IPR013642 (PFAM); PTHR10579:SF8 (PANTHER); PTHR10579 (PANTHER); NON_CYTOPLASMIC_DOMAIN (PHOBIUS); CYTOPLASMIC_DOMAIN (PHOBIUS); TRANSMEMBRANE (PHOBIUS); TMhelix (TMHMM)                                                                                                                                                                                                                                                                                                                                                                                                                                                               |
| 358 | c13487_g1_i1_len_2145_path_101_0_2144_5 | 6588 | calreticulin                                                                 | 715 | 0        | 84.20% | 0.18  | Coil (COILS); IPR001580 (PRINTS); IPR001580 (PFAM); IPR013320 (G3DSA:2.60.120.GENE3D); PTHR11073:SF8 (PANTHER); IPR001580 (PANTHER); IPR018124 (PROSITE_PATTERNS); IPR018124 (PROSITE_PATTERNS); IPR018124 (PROSITE_PATTERNS); IPR018124 (PROSITE_PATTERNS); NON_CYTOPLASMIC_DOMAIN (PHOBIUS); CYTOPLASMIC_DOMAIN (PHOBIUS); NON_CYTOPLASMIC_DOMAIN (PHOBIUS); CYTOPLASMIC_DOMAIN (PHOBIUS); TRANSMEMBRANE (PHOBIUS); TRANSMEMBRANE (PHOBIUS); NON_CYTOPLASMIC_DOMAIN (PHOBIUS); TRANSMEMBRANE (PHOBIUS); TRANSMEMBRANE (PHOBIUS); IPR009033 (SUPERFAMILY); IPR013320 (SUPERFAMILY); TMhelix (TMHMM); TMhelix (TMHMM); TMhelix (TMHMM) |
| 359 | c134888_g1_i1_len_290_path_1_0_289_1    | 10   | zinc finger protein ozf-like                                                 | 97  | 1.78E-10 | 59.50% | 0.116 | IPR015880 (SMART); PF13465 (PFAM); IPR013087 (G3DSA:3.30.160.GENE3D); IPR013087 (G3DSA:3.30.160.GENE3D); PTHR24409:SF14 (PANTHER); PTHR24409 (PANTHER); IPR007087 (PROSITE_PATTERNS); IPR007087 (PROSITE_PROFILES); IPR007087 (PROSITE_PROFILES); SSF57667 (SUPERFAMILY)                                                                                                                                                                                                                                                                                                                                                               |
| 360 | c134941_g1_i1_len_260_path_238_0_259_1  | 4    | zinc finger protein 649 isoform x1                                           | 87  | 1.71E-09 | 66.50% | 0.151 | IPR015880 (SMART); IPR007087 (PFAM); IPR013087 (G3DSA:3.30.160.GENE3D); IPR013087 (G3DSA:3.30.160.GENE3D); PTHR24409 (PANTHER); IPR007087 (PROSITE_PATTERNS); IPR007087 (PROSITE_PROFILES); SSF57667 (SUPERFAMILY)                                                                                                                                                                                                                                                                                                                                                                                                                     |
| 361 | c135229_g1_i1_len_401_path_379_0_400_1  | 17   | latrophilin cir1-like isoform x1                                             | 134 | 3.28E-12 | 54.00% | 0.126 | IPR000203 (PFAM); PTHR12011 (PANTHER); IPR000203 (PROSITE_PROFILES)                                                                                                                                                                                                                                                                                                                                                                                                                                                                                                                                                                    |
| 362 | c135283_g1_i1_len_261_path_1_0_260_4    | 5    | zinc finger protein 337-like                                                 | 87  | 4.56E-19 | 62.20% | 0.098 | IPR015880 (SMART); IPR013087 (G3DSA:3.30.160.GENE3D); IPR013087 (G3DSA:3.30.160.GENE3D); IPR013087 (G3DSA:3.30.160.GENE3D); PF13465 (PFAM); IPR007087 (PFAM); PTHR24409 (PANTHER); IPR007087 (PROSITE_PATTERNS); IPR007087 (PROSITE_PATTERNS); IPR007087 (PROSITE_PATTERNS); IPR007087 (PROSITE_PROFILES); IPR007087 (PROSITE_PROFILES); SSF57667 (SUPERFAMILY); SSF57667 (SUPERFAMILY)                                                                                                                                                                                                                                                |



|     |                                                         |     |                                                                          |     |          |        |        |                                                                                                                                                                                                                                                                                                                                                                                                                                                                                                                                                                                                                             |
|-----|---------------------------------------------------------|-----|--------------------------------------------------------------------------|-----|----------|--------|--------|-----------------------------------------------------------------------------------------------------------------------------------------------------------------------------------------------------------------------------------------------------------------------------------------------------------------------------------------------------------------------------------------------------------------------------------------------------------------------------------------------------------------------------------------------------------------------------------------------------------------------------|
| 363 | c13540_g2_i1_len_997_path_1173_0_996_5                  | 39  | cytoglobin-2-like isoform 1                                              | 332 | 5.92E-46 | 61.80% | 0.137  | IPR002336 (PRINTS); IPR000971 (PFAM); IPR012292 (G3DSA:1.10.490.GENE3D); PTHR11442:SF36 (PANTHER); PTHR11442 (PANTHER); NON_CYTOPLASMIC_DOMAIN (PHOBIUS); CYTOPLASMIC_DOMAIN (PHOBIUS); TRANSMEMBRANE (PHOBIUS); TRANSMEMBRANE (PHOBIUS); CYTOPLASMIC_DOMAIN (PHOBIUS); NON_CYTOPLASMIC_DOMAIN (PHOBIUS); TRANSMEMBRANE (PHOBIUS); IPR000971 (PROSITE_PROFILES); IPR009050 (SUPERFAMILY); TMhelix (TMHMM); TMhelix (TMHMM); TMhelix (TMHMM)                                                                                                                                                                                 |
| 364 | c135472_g1_i1_len_601_path_1_0_600_1                    | 24  | low-density lipoprotein receptor-related protein 2                       | 200 | 3.63E-96 | 83.90% | 0.1    | IPR000742 (SMART); IPR001881 (SMART); IPR002172 (SMART); IPR002172 (PFAM); IPR002172 (G3DSA:4.10.400.GENE3D); IPR026823 (PFAM); G3DSA:2.10.25.10 (GENE3D); IPR011042 (G3DSA:2.120.10.GENE3D); G3DSA:2.10.25.10 (GENE3D); PTHR10529 (PANTHER); IPR000152 (PROSITE_PATTERNS); IPR018097 (PROSITE_PATTERNS); IPR018097 (PROSITE_PATTERNS); IPR023415 (PROSITE_PATTERNS); IPR013032 (PROSITE_PATTERNS); IPR000152 (PROSITE_PATTERNS); IPR000742 (PROSITE_PROFILES); IPR000742 (PROSITE_PROFILES); IPR002172 (PROSITE_PROFILES); SSF63825 (SUPERFAMILY); SSF57196 (SUPERFAMILY); SSF57196 (SUPERFAMILY); IPR002172 (SUPERFAMILY) |
| 365 | c136024_g1_i1_len_247_path_225_0_246_3                  | 4   | insulin-like growth factor-binding protein complex acid labile subunit   | 83  | 1.08E-28 | 77.60% | 0.106  | SM00365 (SMART); IPR003591 (SMART); PF13516 (PFAM); IPR001611 (PFAM); G3DSA:3.80.10.10 (GENE3D); PTHR24365 (PANTHER); IPR001611 (PROSITE_PROFILES); IPR001611 (PROSITE_PROFILES); IPR001611 (PROSITE_PROFILES); SSF52058 (SUPERFAMILY)                                                                                                                                                                                                                                                                                                                                                                                      |
| 366 | c136260_g1_i1_len_456_path_434_0_455_3                  | 8   | laminin subunit alpha-like                                               | 152 | 1.34E-65 | 78.20% | 0.102  | PR00011 (PRINTS); IPR002049 (SMART); G3DSA:2.10.25.10 (GENE3D); IPR002049 (PFAM); PTHR10574:SF39 (PANTHER); PTHR10574 (PANTHER); SSF57196 (SUPERFAMILY); SSF57196 (SUPERFAMILY)                                                                                                                                                                                                                                                                                                                                                                                                                                             |
| 367 | c136411_g1_i1_len_655_path_1_0_654_4                    | 26  | ribosomal protein s6 kinase beta-1-like                                  | 218 | 9.75E-98 | 82.70% | 0.366Y | IPR000961 (SMART); G3DSA:1.10.510.10 (GENE3D); IPR017892 (PFAM); IPR000719 (PFAM); PTHR24351 (PANTHER); PTHR24351:SF64 (PANTHER); IPR000719 (PROSITE_PROFILES); IPR000961 (PROSITE_PROFILES); IPR011009 (SUPERFAMILY)                                                                                                                                                                                                                                                                                                                                                                                                       |
| 368 | c136560_g1_i1_len_302_path_1_0_301_2                    | 7   | er degradation-enhancing alpha-mannosidase-like 1                        | 100 | 5.52E-46 | 86.20% | 0.255  | IPR001382 (G3DSA:1.50.10.GENE3D); IPR001382 (PFAM); IPR001382 (PANTHER); PTHR11742:SF25 (PANTHER); IPR001382 (SUPERFAMILY)                                                                                                                                                                                                                                                                                                                                                                                                                                                                                                  |
| 369 | c136798_g1_i1_len_247_path_225_0_246_0                  | 2   | sortilin-related receptor-like                                           | 83  | 4.53E-12 | 55.30% | 0.102  | IPR002172 (SMART); G3DSA:4.10.1220.10 (GENE3D); IPR002172 (PFAM); IPR002172 (G3DSA:4.10.400.GENE3D); PTHR10529 (PANTHER); IPR023415 (PROSITE_PATTERNS); IPR002172 (PROSITE_PROFILES); IPR002172 (SUPERFAMILY); IPR002172 (SUPERFAMILY)                                                                                                                                                                                                                                                                                                                                                                                      |
| 370 | c136840_g1_i1_len_273_path_251_0_272_5                  | 6   | von willebrand factor type egf and pentraxin domain-containing protein 1 | 91  | 3.04E-15 | 57.00% | 0.104  | IPR000436 (SMART); G3DSA:2.10.70.10 (GENE3D); IPR000436 (PFAM); G3DSA:2.10.70.10 (GENE3D); PTHR19325:SF343 (PANTHER); PTHR19325 (PANTHER); IPR000436 (PROSITE_PROFILES); IPR000436 (PROSITE_PROFILES); IPR000436 (SUPERFAMILY); IPR000436 (SUPERFAMILY)                                                                                                                                                                                                                                                                                                                                                                     |
| 371 | c136897_g1_i1_len_313_path_1_0_312_1                    | 9   | alpha beta hydrolase domain-containing protein 17c-like                  | 104 | 1.96E-23 | 85.50% | 0.108  | PTHR12277:SF52 (PANTHER); PTHR12277 (PANTHER)                                                                                                                                                                                                                                                                                                                                                                                                                                                                                                                                                                               |
| 372 | c136963_g1_i1_len_301_path_279_0_300_2                  | 6   | stress response element binding protein                                  | 100 | 2.15E-14 | 71.40% | 0.101  | IPR015880 (SMART); IPR013087 (G3DSA:3.30.160.GENE3D); IPR013087 (G3DSA:3.30.160.GENE3D); PF13465 (PFAM); PTHR24409 (PANTHER); IPR007087 (PROSITE_PATTERNS); IPR007087 (PROSITE_PATTERNS); IPR007087 (PROSITE_PROFILES); IPR007087 (PROSITE_PROFILES); SSF57667 (SUPERFAMILY)                                                                                                                                                                                                                                                                                                                                                |
| 373 | c137000_g1_i1_len_312_path_290_0_311_5                  | 4   | threonine synthase-like 2                                                | 104 | 3.01E-39 | 76.30% | 0.114  | G3DSA:3.40.50.1100 (GENE3D); PTHR10314 (PANTHER); IPR027457 (PTHR10314:PANTHER); IPR001926 (SUPERFAMILY)                                                                                                                                                                                                                                                                                                                                                                                                                                                                                                                    |
| 374 | c13708_g1_i1_len_1305_path_533_0_1039_2_91_1040_1304_3  | 549 | serine protease1 2                                                       | 435 | 1.05E-54 | 56.90% | 0.335  | IPR001314 (PRINTS); IPR001254 (SMART); IPR001254 (PFAM); G3DSA:2.40.10.10 (GENE3D); G3DSA:2.40.10.10 (GENE3D); PTHR24260 (PANTHER); IPR018114 (PROSITE_PATTERNS); IPR018114 (PROSITE_PATTERNS); CYTOPLASMIC_DOMAIN (PHOBIUS); NON_CYTOPLASMIC_DOMAIN (PHOBIUS); TRANSMEMBRANE (PHOBIUS); IPR001254 (PROSITE_PROFILES); IPR009003 (SUPERFAMILY); TMhelix (TMHMM)                                                                                                                                                                                                                                                             |
| 375 | c13708_g1_i2_len_1180_path_533_0_1039_1_572_1040_1179_4 | 678 | serine protease1 2                                                       | 393 | 3.16E-55 | 56.90% | 0.755Y | IPR001314 (PRINTS); IPR001254 (SMART); G3DSA:2.40.10.10 (GENE3D); IPR001254 (PFAM); G3DSA:2.40.10.10 (GENE3D); PTHR24260 (PANTHER); IPR018114 (PROSITE_PATTERNS); IPR018114 (PROSITE_PATTERNS); IPR001254 (PROSITE_PROFILES); SignalP-noTM (SIGNALP_EUK); IPR009003 (SUPERFAMILY)                                                                                                                                                                                                                                                                                                                                           |
| 376 | c137305_g1_i1_len_272_path_1_0_271_5                    | 4   | neprilysin-2-like isoform x3                                             | 90  | 4.27E-12 | 63.30% | 0.11   | IPR008753 (PFAM); IPR024079 (G3DSA:3.40.390.GENE3D); IPR000718 (PANTHER); SSF55486 (SUPERFAMILY)                                                                                                                                                                                                                                                                                                                                                                                                                                                                                                                            |

|     |                                                   |      |                                                                                               |     |          |        |        |                                                                                                                                                                                                                                                                                                                                                                                                                                                                                                                                                                                                                                                                                                                                                                                                        |
|-----|---------------------------------------------------|------|-----------------------------------------------------------------------------------------------|-----|----------|--------|--------|--------------------------------------------------------------------------------------------------------------------------------------------------------------------------------------------------------------------------------------------------------------------------------------------------------------------------------------------------------------------------------------------------------------------------------------------------------------------------------------------------------------------------------------------------------------------------------------------------------------------------------------------------------------------------------------------------------------------------------------------------------------------------------------------------------|
| 377 | c137420_g1_i1_len_294_path_1_0_293_3              | 4    | zinc finger protein 502                                                                       | 98  | 4.07E-21 | 65.20% | 0.108  | IPR015880 (SMART); IPR013087 (G3DSA:3.30.160.GENE3D); PF13465 (PFAM); PTHR24409 (PANTHER); IPR007087 (PROSITE_PATTERNS); IPR007087 (PROSITE_PATTERNS); IPR007087 (PROSITE_PROFILES); IPR007087 (PROSITE_PROFILES); SSF57667 (SUPERFAMILY)                                                                                                                                                                                                                                                                                                                                                                                                                                                                                                                                                              |
| 378 | c13753_g1_i1_len_1724_path_1_0_1723_5             | 1973 | leucine rich repeat protein                                                                   | 574 | 2.54E-29 | 50.60% | 0.593Y | IPR003591 (SMART); SM00364 (SMART); IPR001611 (PFAM); G3DSA:3.80.10.10 (GENE3D); IPR001611 (PFAM); G3DSA:3.80.10.10 (GENE3D); G3DSA:3.80.10.10 (GENE3D); PTHR24365 (PANTHER); SIGNAL_PEPTIDE_N_REGION (PHOBIUS); SIGNAL_PEPTIDE_H_REGION (PHOBIUS); SIGNAL_PEPTIDE (PHOBIUS); SIGNAL_PEPTIDE_C_REGION (PHOBIUS); NON_CYTOPLASMIC_DOMAIN (PHOBIUS); TRANSMEMBRANE (PHOBIUS); CYTOPLASMIC_DOMAIN (PHOBIUS); IPR001611 (PROSITE_PROFILES); SignalP-noTM (SIGNALP_EUK); SSF52058 (SUPERFAMILY) |
| 379 | c137823_g1_i1_len_286_path_1_0_285_1              | 4    | xanthine dehydrogenase                                                                        | 95  | 1.54E-21 | 69.50% | 0.103  | IPR000674 (SMART); IPR000674 (PFAM); IPR000674 (G3DSA:3.90.1170.GENE3D); PTHR11908:SF32 (PANTHER); PTHR11908 (PANTHER); IPR000674 (SUPERFAMILY)                                                                                                                                                                                                                                                                                                                                                                                                                                                                                                                                                                                                                                                        |
| 380 | c13812_g2_i1_len_678_path_656_0_677_3             | 15   | low quality protein: von willebrand factor type egf and pentraxin domain-containing protein 1 | 226 | 3.17E-41 | 51.00% | 0.104  | IPR000436 (SMART); G3DSA:2.10.70.10 (GENE3D); G3DSA:2.10.70.10 (GENE3D); G3DSA:2.10.70.10 (GENE3D); IPR000436 (PFAM); PTHR19325 (PANTHER); IPR000436 (PROSITE_PROFILES); IPR000436 (PROSITE_PROFILES); IPR000436 (PROSITE_PROFILES); IPR000436 (PROSITE_PROFILES); IPR000436 (SUPERFAMILY); IPR000436 (SUPERFAMILY); IPR000436 (SUPERFAMILY); IPR000436 (SUPERFAMILY)                                                                                                                                                                                                                                                                                                                                                                                                                                  |
| 381 | c138240_g1_i1_len_348_path_1_0_347_1              | 6    | glucose dehydrogenase                                                                         | 116 | 3.40E-43 | 75.80% | 0.1    | G3DSA:3.50.50.60 (GENE3D); IPR000172 (PFAM); PTHR11552 (PANTHER); PTHR11552:SF90 (PANTHER); IPR000172 (PROSITE_PATTERNS); SSF51905 (SUPERFAMILY)                                                                                                                                                                                                                                                                                                                                                                                                                                                                                                                                                                                                                                                       |
| 382 | c13827_g1_i1_len_692_path_841_0_598_86_599_691_2  | 27   | lysosomal pro-x carboxypeptidase                                                              | 230 | 3.43E-89 | 70.40% | 0.244  | IPR008758 (PFAM); PTHR11010:SF11 (PANTHER); IPR008758 (PANTHER)                                                                                                                                                                                                                                                                                                                                                                                                                                                                                                                                                                                                                                                                                                                                        |
| 383 | c13827_g1_i2_len_178_path_1_0_84_86_85_177_1      | 1    | lysosomal pro-x carboxypeptidase-like                                                         | 59  | 3.05E-12 | 79.60% | 0.107  | PTHR11010:SF11 (PANTHER); IPR008758 (PANTHER)                                                                                                                                                                                                                                                                                                                                                                                                                                                                                                                                                                                                                                                                                                                                                          |
| 384 | c138410_g1_i1_len_385_path_363_0_384_2            | 6    | prenylcysteine oxidase-like                                                                   | 128 | 1.15E-35 | 70.10% | 0.122  | G3DSA:3.50.50.60 (GENE3D); PF13450 (PFAM); IPR017046 (PANTHER); SSF51905 (SUPERFAMILY)                                                                                                                                                                                                                                                                                                                                                                                                                                                                                                                                                                                                                                                                                                                 |
| 385 | c138415_g1_i1_len_406_path_1_0_405_1              | 9    | low-density lipoprotein                                                                       | 135 | 5.39E-52 | 69.00% | 0.104  | IPR002172 (PRINTS); IPR002172 (SMART); IPR002172 (PFAM); IPR002172 (G3DSA:4.10.400.GENE3D); IPR002172 (G3DSA:4.10.400.GENE3D); IPR002172 (G3DSA:4.10.400.GENE3D); IPR002172 (G3DSA:4.10.400.GENE3D); PTHR10529 (PANTHER); IPR023415 (PROSITE_PATTERNS); IPR023415 (PROSITE_PATTERNS); IPR002172 (PROSITE_PROFILES); IPR002172 (PROSITE_PROFILES); IPR002172 (SUPERFAMILY); IPR002172 (SUPERFAMILY); IPR002172 (SUPERFAMILY) IPR013126 (PRINTS); G3DSA:3.30.30.30 (GENE3D); G3DSA:3.30.420.40 (GENE3D); IPR013126 (PFAM); PTHR19375 (PANTHER); PTHR19375:SF173 (PANTHER); IPR018181 (PROSITE_PATTERNS); SSF53067 (SUPERFAMILY)                                                                                                                                                                          |
| 386 | c138485_g1_i1_len_427_path_1_0_426_3              | 6    | chaperone protein                                                                             | 143 | 6.22E-41 | 82.60% | 0.102  | IPR004911 (PFAM); IPR004911 (PANTHER); PTHR13234:SF8 (PANTHER)                                                                                                                                                                                                                                                                                                                                                                                                                                                                                                                                                                                                                                                                                                                                         |
| 387 | c13849_g1_i1_len_905_path_883_0_904_0             | 90   | gamma-interferon-inducible lysosomal thiol reductase                                          | 302 | 1.60E-43 | 51.30% | 0.242  | G3DSA:3.40.50.2300 (GENE3D); IPR002455 (PANTHER); PTHR10519:SF3 (PANTHER); IPR028082 (SUPERFAMILY)                                                                                                                                                                                                                                                                                                                                                                                                                                                                                                                                                                                                                                                                                                     |
| 388 | c13858_g1_i1_len_630_path_1_0_237_1042_238_629_3  | 9    | metabotropic gaba-b receptor subtype isoform b                                                | 210 | 1.33E-26 | 83.40% | 0.108  | PR01176 (PRINTS); IPR001828 (PFAM); G3DSA:3.40.50.2300 (GENE3D); IPR002455 (PANTHER); PTHR10519:SF3 (PANTHER); IPR028082 (SUPERFAMILY)                                                                                                                                                                                                                                                                                                                                                                                                                                                                                                                                                                                                                                                                 |
| 389 | c13858_g1_i1_len_630_path_1_0_237_1042_238_629_4  | 9    | gamma-aminobutyric acid type b receptor subunit 1 isoform x3                                  | 210 | 3.24E-74 | 90.40% | 0.11   | IPR002456 (PRINTS); IPR001828 (PFAM); G3DSA:3.40.50.2300 (GENE3D); IPR002455 (PANTHER); PTHR10519:SF3 (PANTHER); IPR028082 (SUPERFAMILY)                                                                                                                                                                                                                                                                                                                                                                                                                                                                                                                                                                                                                                                               |
| 390 | c13858_g1_i2_len_336_path_1_0_237_239_2_38_335_3  | 12   | gamma-aminobutyric acid type b receptor subunit 1-like                                        | 112 | 2.98E-44 | 81.70% | 0.117  | IPR002130 (PRINTS); IPR029000 (G3DSA:2.40.100.GENE3D); IPR002130 (PFAM); IPR024936 (PANTHER); PTHR11071:SF58 (PANTHER); TRANSMEMBRANE (PHOBIUS); NON_CYTOPLASMIC_DOMAIN (PHOBIUS); CYTOPLASMIC_DOMAIN (PHOBIUS); IPR002130 (PROSITE_PROFILES); IPR029000 (SUPERFAMILY); TMhelix (TMHMM)                                                                                                                                                                                                                                                                                                                                                                                                                                                                                                                |
| 391 | c13881_g1_i1_len_494_path_472_0_276_749_277_493_5 | 22   | peptidyl-prolyl cis-trans isomerase h                                                         | 164 | 9.07E-57 | 96.10% | 0.1    | IPR002130 (PRINTS); IPR029000 (G3DSA:2.40.100.GENE3D); IPR002130 (PFAM); IPR024936 (PANTHER); PTHR11071:SF58 (PANTHER); TRANSMEMBRANE (PHOBIUS); NON_CYTOPLASMIC_DOMAIN (PHOBIUS); CYTOPLASMIC_DOMAIN (PHOBIUS); IPR002130 (PROSITE_PROFILES); IPR029000 (SUPERFAMILY); TMhelix (TMHMM)                                                                                                                                                                                                                                                                                                                                                                                                                                                                                                                |

|     |                                          |     |                                        |     |           |        |       |                                                                                                                                                                                                                                                                                                                                                                                                                                                                                                                                                                                                                                                                                                                                                                                                                                                                                                                                                   |
|-----|------------------------------------------|-----|----------------------------------------|-----|-----------|--------|-------|---------------------------------------------------------------------------------------------------------------------------------------------------------------------------------------------------------------------------------------------------------------------------------------------------------------------------------------------------------------------------------------------------------------------------------------------------------------------------------------------------------------------------------------------------------------------------------------------------------------------------------------------------------------------------------------------------------------------------------------------------------------------------------------------------------------------------------------------------------------------------------------------------------------------------------------------------|
| 392 | c13885_g1_i1_len_2216_path_2194_0_2215_1 | 145 | afg3-like protein 2                    | 739 | 0         | 92.90% | 0.107 | IPR003593 (SMART); IPR003959 (PFAM); IPR005936 (TIGRFAM); IPR027417 (G3DSA:3.40.50.GENE3D); IPR000642 (PFAM); G3DSA:1.10.8.60 (GENE3D); PTHR23076:SF38 (PANTHER); PTHR23076 (PANTHER); IPR003960 (PROSITE_PATTERNS); NON_CYTOPLASMIC_DOMAIN (PHOBIUS); CYTOPLASMIC_DOMAIN (PHOBIUS); TRANSMEMBRANE (PHOBIUS); NON_CYTOPLASMIC_DOMAIN (PHOBIUS); TRANSMEMBRANE (PHOBIUS); IPR005936 (HAMAP); SSF140990 (SUPERFAMILY); IPR027417 (SUPERFAMILY); TMhelix (TMHMM)                                                                                                                                                                                                                                                                                                                                                                                                                                                                                     |
| 393 | c138880_g1_i1_len_346_path_1_0_345_4     | 16  | ---NA---                               | 115 |           |        | 0.104 | no IPS match                                                                                                                                                                                                                                                                                                                                                                                                                                                                                                                                                                                                                                                                                                                                                                                                                                                                                                                                      |
| 394 | c139001_g1_i1_len_267_path_245_0_266_0   | 4   | ---NA---                               | 89  |           |        | 0.106 | IPR001190 (PFAM); IPR017448 (G3DSA:3.10.250.GENE3D); IPR001190 (PROSITE_PROFILES); IPR017448 (SUPERFAMILY)                                                                                                                                                                                                                                                                                                                                                                                                                                                                                                                                                                                                                                                                                                                                                                                                                                        |
| 395 | c13927_g2_i1_len_612_path_590_0_611_5    | 14  | keratin-associated protein 5-          | 204 | 2.88E-56  | 56.10% | 0.118 | IPR000742 (SMART); G3DSA:2.170.300.10 (GENE3D); IPR013032 (PFAM); IPR000742 (PFAM); G3DSA:2.10.25.10 (GENE3D); PTHR24838 (PANTHER); IPR013032 (PROSITE_PATTERNS); IPR000742 (PROSITE_PROFILES); IPR000742 (PROSITE_PROFILES); IPR000742 (PROSITE_PROFILES); SSF57196 (SUPERFAMILY); SSF57196 (SUPERFAMILY)                                                                                                                                                                                                                                                                                                                                                                                                                                                    |
| 396 | c139353_g1_i1_len_269_path_1_0_268_2     | 4   | #NAME?                                 | 89  | 4.95E-47  | 91.50% | 0.141 | IPR001830 (PFAM); G3DSA:3.40.50.2000 (GENE3D); PTHR10788 (PANTHER); PTHR10788:SF6 (PANTHER); SSF53756 (SUPERFAMILY)                                                                                                                                                                                                                                                                                                                                                                                                                                                                                                                                                                                                                                                                                                                                                                                                                               |
| 397 | c13937_g1_i1_len_879_path_1_0_878_3      | 52  | probable isocitrate dehydrogenase      | 293 | 2.95E-162 | 87.50% | 0.104 | IPR024084 (G3DSA:3.40.718.GENE3D); IPR024084 (PFAM); IPR004434 (TIGRFAM); PTHR11835:SF39 (PANTHER); IPR001804 (PANTHER); IPR019818 (PROSITE_PATTERNS); SSF53659 (SUPERFAMILY)                                                                                                                                                                                                                                                                                                                                                                                                                                                                                                                                                                                                                                                                                                                                                                     |
| 398 | c139468_g1_i1_len_554_path_532_0_553_5   | 7   | wd repeat domain-containing protein 83 | 184 | 9.24E-40  | 84.60% | 0.33  | IPR001680 (SMART); IPR001680 (PFAM); IPR015943 (G3DSA:2.130.10.GENE3D); PTHR22842 (PANTHER); IPR019775 (PROSITE_PATTERNS); IPR001680 (PROSITE_PROFILES); IPR017986 (PROSITE_PROFILES); IPR001680 (PROSITE_PROFILES); IPR017986 (SUPERFAMILY)                                                                                                                                                                                                                                                                                                                                                                                                                                                                                                                                                                                                                                                                                                      |
| 399 | c139535_g1_i1_len_314_path_1_0_313_3     | 4   | protease inhibitors-like isoform x2    | 105 | 2.29E-11  | 53.80% | 0.104 | IPR008037 (PFAM); IPR020862 (PROSITE_PROFILES); IPR020862 (PROSITE_PROFILES); IPR008037 (SUPERFAMILY); IPR008037 (SUPERFAMILY)                                                                                                                                                                                                                                                                                                                                                                                                                                                                                                                                                                                                                                                                                                                                                                                                                    |
| 400 | c13967_g1_i1_len_408_path_1_0_407_5      | 6   | fibrillin-2-like                       | 136 | 2.41E-61  | 78.90% | 0.101 | IPR000742 (SMART); IPR001881 (SMART); IPR017878 (G3DSA:3.90.290.GENE3D); G3DSA:2.10.25.10 (GENE3D); IPR017878 (PFAM); G3DSA:2.10.25.10 (GENE3D); IPR001881 (PFAM); PTHR24039:SF20 (PANTHER); IPR011398 (PANTHER); IPR018097 (PROSITE_PATTERNS); IPR013032 (PROSITE_PATTERNS); IPR000152 (PROSITE_PATTERNS); IPR013032 (PROSITE_PATTERNS); IPR017878 (PROSITE_PROFILES); IPR000742 (PROSITE_PROFILES); IPR017878 (SUPERFAMILY); SSF57196 (SUPERFAMILY)                                                                                                                                                                                                                                                                                                                                                                                                                                                                                             |
| 401 | c13967_g2_i1_len_1580_path_2328_0_1579_0 | 83  | fibrillin-2-like                       | 527 | 1.02E-163 | 64.40% | 0.117 | IPR000742 (SMART); IPR001881 (SMART); G3DSA:2.10.25.10 (GENE3D); G3DSA:2.10.25.10 (GENE3D); G3DSA:2.10.25.10 (GENE3D); G3DSA:2.10.25.10 (GENE3D); IPR001881 (PFAM); PTHR24039:SF20 (PANTHER); IPR011398 (PANTHER); IPR013032 (PROSITE_PATTERNS); IPR000152 (PROSITE_PATTERNS); IPR013032 (PROSITE_PATTERNS); IPR018097 (PROSITE_PATTERNS); IPR013032 (PROSITE_PATTERNS); IPR013032 (PROSITE_PATTERNS); IPR000152 (PROSITE_PATTERNS); IPR000152 (PROSITE_PATTERNS); IPR013032 (PROSITE_PATTERNS); IPR018097 (PROSITE_PATTERNS); IPR013032 (PROSITE_PATTERNS); IPR000152 (PROSITE_PATTERNS); IPR013032 (PROSITE_PATTERNS); IPR000152 (PROSITE_PATTERNS); IPR018097 (PROSITE_PATTERNS); IPR018097 (PROSITE_PATTERNS); IPR000152 (PROSITE_PATTERNS); IPR000742 (PROSITE_PROFILES); IPR000742 (PROSITE_PROFILES); IPR000742 (PROSITE_PROFILES); IPR000742 (PROSITE_PROFILES); SSF57196 (SUPERFAMILY); IPR009030 (SUPERFAMILY); IPR009030 (SUPERFAMILY) |
| 402 | c13970_g1_i1_len_150_path_1_0_149_3      | 2   | b-cell lymphoma leukemia 11a-like      | 50  | 8.11E-14  | 78.60% | 0.105 | IPR013087 (G3DSA:3.30.160.GENE3D); IPR013087 (G3DSA:3.30.160.GENE3D); PF13465 (PFAM); PTHR24409 (PANTHER); IPR007087 (PROSITE_PATTERNS); IPR007087 (PROSITE_PROFILES); SSF57667 (SUPERFAMILY)                                                                                                                                                                                                                                                                                                                                                                                                                                                                                                                                                                                                                                                                                                                                                     |

|     |                                                   |    |                                                                          |     |          |        |       |                                                                                                                                                                                                                                                                                                                                                                                                                                                           |
|-----|---------------------------------------------------|----|--------------------------------------------------------------------------|-----|----------|--------|-------|-----------------------------------------------------------------------------------------------------------------------------------------------------------------------------------------------------------------------------------------------------------------------------------------------------------------------------------------------------------------------------------------------------------------------------------------------------------|
| 403 | c13972_g1_i1_len_1112_path_1_0_431_433_432_1111_5 | 39 | zinc finger protein 501-like                                             | 370 | 1.82E-21 | 47.70% | 0.1   | IPR015880 (SMART); PF13894 (PFAM); IPR007087 (PFAM); IPR013087 (G3DSA:3.30.160.GENE3D); IPR013087 (G3DSA:3.30.160.GENE3D); IPR013087 (G3DSA:3.30.160.GENE3D); PTHR24409 (PANTHER); IPR007087 (PROSITE_PATTERNS); IPR007087 (PROSITE_PATTERNS); IPR007087 (PROSITE_PROFILES); IPR007087 (PROSITE_PROFILES); IPR007087 (PROSITE_PROFILES); IPR007087 (PROSITE_PROFILES); SSF57667 (SUPERFAMILY); SSF57667 (SUPERFAMILY); SSF57667 (SUPERFAMILY)             |
| 404 | c140065_g1_i1_len_464_path_1_0_463_3              | 7  | membrane metallo-endopeptidase-like 1-like                               | 155 | 3.39E-42 | 68.20% | 0.114 | IPR008753 (PFAM); G3DSA:1.10.1380.10 (GENE3D); PTHR11733:SF113 (PANTHER); IPR000718 (PANTHER); SSF55486 (SUPERFAMILY)                                                                                                                                                                                                                                                                                                                                     |
| 405 | c14022_g1_i1_len_1074_path_1_0_92_94_93_1073_0    | 56 | aael003561- partial                                                      | 358 | 1.95E-25 | 52.80% | 0.178 | IPR001211 (PRINTS); IPR016090 (SMART); IPR016090 (G3DSA:1.20.90.GENE3D); IPR016090 (PFAM); IPR001211 (PANTHER); PTHR11716:SF45 (PANTHER); IPR013090 (PROSITE_PATTERNS); IPR013090 (PROSITE_PATTERNS); TRANSMEMBRANE (PHOBIUS); CYTOPLASMIC_DOMAIN (PHOBIUS); TRANSMEMBRANE (PHOBIUS); NON_CYTOPLASMIC_DOMAIN (PHOBIUS); CYTOPLASMIC_DOMAIN (PHOBIUS); NON_CYTOPLASMIC_DOMAIN (PHOBIUS); TRANSMEMBRANE (PHOBIUS); IPR016090 (SUPERFAMILY); TMhelix (TMHMM) |
| 406 | c14022_g1_i2_len_1059_path_2103_0_77_94_78_1058_0 | 42 | aael003561- partial                                                      | 353 | 1.83E-25 | 52.60% | 0.206 | IPR001211 (PRINTS); IPR016090 (SMART); IPR016090 (PFAM); IPR016090 (G3DSA:1.20.90.GENE3D); IPR001211 (PANTHER); IPR013090 (PROSITE_PATTERNS); IPR013090 (PROSITE_PATTERNS); TRANSMEMBRANE (PHOBIUS); NON_CYTOPLASMIC_DOMAIN (PHOBIUS); CYTOPLASMIC_DOMAIN (PHOBIUS); CYTOPLASMIC_DOMAIN (PHOBIUS); TRANSMEMBRANE (PHOBIUS); TRANSMEMBRANE (PHOBIUS); NON_CYTOPLASMIC_DOMAIN (PHOBIUS); IPR016090 (SUPERFAMILY); TMhelix (TMHMM)                           |
| 407 | c140284_g1_i1_len_141_path_1_0_140_1              | 0  | myosin heavy chain partial                                               | 47  | 2.98E-16 | 97.40% | 0.105 | Coil (COILS); IPR002928 (PFAM); PTHR13140:SF364 (PANTHER); PTHR13140 (PANTHER)                                                                                                                                                                                                                                                                                                                                                                            |
| 408 | c140392_g1_i1_len_289_path_1_0_288_1              | 6  | serine proteinase stubble-like                                           | 96  | 7.99E-21 | 71.20% | 0.13  | G3DSA:2.40.10.10 (GENE3D); IPR001254 (PFAM); PTHR24275 (PANTHER); IPR018114 (PROSITE_PATTERNS); IPR001254 (PROSITE_PROFILES); IPR009003 (SUPERFAMILY)                                                                                                                                                                                                                                                                                                     |
| 409 | c14080_g2_i1_len_1186_path_1305_0_1185_5          | 61 | ankyrin repeat domain-containing protein partial                         | 395 | 1.16E-48 | 75.60% | 0.112 | IPR002110 (SMART); IPR020683 (G3DSA:1.25.40.GENE3D); IPR002110 (PFAM); IPR020683 (PFAM); PTHR24149 (PANTHER); IPR002110 (PROSITE_PROFILES); IPR020683 (PROSITE_PROFILES); IPR002110 (PROSITE_PROFILES); IPR002110 (PROSITE_PROFILES); IPR020683 (SUPERFAMILY)                                                                                                                                                                                             |
| 410 | c140921_g1_i1_len_270_path_248_0_269_4            | 4  | cathepsin b                                                              | 90  | 2.02E-20 | 72.20% | 0.136 | IPR000668 (PFAM); G3DSA:3.90.70.10 (GENE3D); PTHR12411:SF15 (PANTHER); IPR013128 (PANTHER); SSF54001 (SUPERFAMILY)                                                                                                                                                                                                                                                                                                                                        |
| 411 | c141015_g1_i1_len_394_path_1_0_393_2              | 5  | low-density lipoprotein receptor-related protein 4                       | 131 | 2.06E-06 | 62.80% | 0.109 | IPR002172 (SMART); IPR002172 (PFAM); IPR002172 (G3DSA:4.10.400.GENE3D); IPR002172 (PROSITE_PROFILES); IPR002172 (SUPERFAMILY)                                                                                                                                                                                                                                                                                                                             |
| 412 | c14123_g1_i1_len_374_path_470_0_310_962_311_373_4 | 15 | urokinase-type plasminogen activator                                     | 125 | 1.88E-16 | 72.70% | 0.132 | IPR001254 (PFAM); G3DSA:2.40.10.10 (GENE3D); PTHR24265 (PANTHER); IPR018114 (PROSITE_PATTERNS); IPR001254 (PROSITE_PROFILES); IPR009003 (SUPERFAMILY)                                                                                                                                                                                                                                                                                                     |
| 413 | c14123_g1_i2_len_492_path_470_0_310_781_311_491_5 | 19 | urokinase-type plasminogen activator                                     | 164 | 1.84E-12 | 78.00% | 0.167 | IPR001254 (PFAM); G3DSA:2.40.10.10 (GENE3D); PTHR24265 (PANTHER); IPR001254 (PROSITE_PROFILES); IPR009003 (SUPERFAMILY)                                                                                                                                                                                                                                                                                                                                   |
| 414 | c141445_g1_i1_len_180_path_1_0_179_5              | 3  | plexin-b-like isoform x5                                                 | 60  | 5.99E-27 | 91.30% | 0.111 | IPR002909 (PFAM); IPR013783 (G3DSA:2.60.40.GENE3D); PTHR22625:SF31 (PANTHER); PTHR22625 (PANTHER); IPR014756 (SUPERFAMILY)                                                                                                                                                                                                                                                                                                                                |
| 415 | c141926_g1_i1_len_320_path_298_0_319_0            | 4  | von willebrand factor type egf and pentraxin domain-containing protein 1 | 107 | 9.12E-10 | 56.00% | 0.113 | G3DSA:2.10.70.10 (GENE3D); IPR000436 (PFAM); IPR000436 (PROSITE_PROFILES); IPR000436 (SUPERFAMILY)                                                                                                                                                                                                                                                                                                                                                        |
| 416 | c142041_g1_i1_len_387_path_365_0_386_2            | 6  | protein dachsous-like                                                    | 129 | 1.05E-42 | 72.20% | 0.119 | IPR002126 (G3DSA:2.60.40.GENE3D); IPR002126 (PFAM); IPR002126 (G3DSA:2.60.40.GENE3D); PTHR24027 (PANTHER); PTHR24027:SF256 (PANTHER); IPR002126 (PROSITE_PROFILES); IPR002126 (PROSITE_PROFILES); IPR015919 (SUPERFAMILY); IPR015919 (SUPERFAMILY)                                                                                                                                                                                                        |
| 417 | c142423_g1_i1_len_336_path_1_0_335_3              | 5  | acid sphingomyelinase-like phosphodiesterase 3a                          | 112 | 7.63E-20 | 60.00% | 0.257 | IPR029052 (G3DSA:3.60.21.GENE3D); PTHR10340 (PANTHER); PTHR10340:SF14 (PANTHER); SIGNAL_PEPTIDE_N_REGION (PHOBIUS); NON_CYTOPLASMIC_DOMAIN (PHOBIUS); SIGNAL_PEPTIDE_C_REGION (PHOBIUS); SIGNAL_PEPTIDE_H_REGION (PHOBIUS); SIGNAL_PEPTIDE (PHOBIUS); TMhelix (TMHMM)                                                                                                                                                                                     |

|     |                                                                     |     |                                                           |     |           |        |        |                                                                                                                                                                                                                                                                                                                                                                                          |
|-----|---------------------------------------------------------------------|-----|-----------------------------------------------------------|-----|-----------|--------|--------|------------------------------------------------------------------------------------------------------------------------------------------------------------------------------------------------------------------------------------------------------------------------------------------------------------------------------------------------------------------------------------------|
| 418 | c14323_g1_i1_len_926_path_1_0_925_4                                 | 44  | tropinone reductase 2-like                                | 309 | 8.21E-137 | 83.50% | 0.247  | IPR002198 (PRINTS); IPR002347 (PRINTS); IPR002198 (PFAM); IPR016040 (G3DSA:3.40.50.GENE3D); PTHR24322 (PANTHER); PTHR24322:SF111 (PANTHER); IPR020904 (PROSITE_PATTERNS); NON_CYTOPLASMIC_DOMAIN (PHOBIUS); TRANSMEMBRANE (PHOBIUS); CYTOPLASMIC_DOMAIN (PHOBIUS); NON_CYTOPLASMIC_DOMAIN (PHOBIUS); TRANSMEMBRANE (PHOBIUS); SSF51735 (SUPERFAMILY); TMhelix (TMHMM); TMhelix (TMHMM)   |
| 419 | c14329_g1_i1_len_1588_path_1556_0_171_3_134_172_181_1728_182_1587_1 | 60  | ww domain-containing oxidoreductase                       | 529 | 3.16E-167 | 74.70% | 0.131  | Coil (COILS); IPR002347 (PRINTS); IPR001202 (SMART); IPR002198 (PFAM); IPR016040 (G3DSA:3.40.50.GENE3D); G3DSA:2.20.70.10 (GENE3D); PTHR24316:SF115 (PANTHER); PTHR24316 (PANTHER); IPR001202 (PROSITE_PROFILES); IPR001202 (SUPERFAMILY); SSF51735 (SUPERFAMILY)                                                                                                                        |
| 420 | c143471_g1_i1_len_215_path_1_0_214_0                                | 3   | blastula protease 10-like                                 | 72  | 6.98E-25  | 74.40% | 0.102  | IPR001506 (PRINTS); IPR001506 (PFAM); IPR024079 (G3DSA:3.40.390.GENE3D); PTHR10127 (PANTHER); SSF55486 (SUPERFAMILY)                                                                                                                                                                                                                                                                     |
| 421 | c14408_g1_i1_len_1064_path_1042_0_268_1_311_269_1063_2              | 40  | arylsulfatase a-like                                      | 354 | 1.43E-114 | 71.10% | 0.294  | IPR017849 (G3DSA:3.40.720.GENE3D); IPR000917 (PFAM); PTHR10342 (PANTHER); PTHR10342:SF22 (PANTHER); IPR024607 (PROSITE_PATTERNS); NON_CYTOPLASMIC_DOMAIN (PHOBIUS); CYTOPLASMIC_DOMAIN (PHOBIUS); TRANSMEMBRANE (PHOBIUS); IPR017850 (SUPERFAMILY); TMhelix (TMHMM)                                                                                                                      |
| 422 | c14408_g1_i2_len_487_path_1042_0_268_21_06_269_486_2                | 17  | arylsulfatase a-like                                      | 162 | 8.42E-11  | 74.80% | 0.294  | IPR000917 (PFAM); IPR017849 (G3DSA:3.40.720.GENE3D); PTHR10342 (PANTHER); PTHR10342:SF27 (PANTHER); CYTOPLASMIC_DOMAIN (PHOBIUS); NON_CYTOPLASMIC_DOMAIN (PHOBIUS); TRANSMEMBRANE (PHOBIUS); CYTOPLASMIC_DOMAIN (PHOBIUS); TRANSMEMBRANE (PHOBIUS); NON_CYTOPLASMIC_DOMAIN (PHOBIUS); IPR017850 (SUPERFAMILY); TMhelix (TMHMM); TMhelix (TMHMM); TMhelix (TMHMM)                         |
| 423 | c144328_g1_i1_len_147_path_125_0_146_0                              | 2   | achain structural basis for dscam isoform specificity     | 49  | 5.07E-24  | 97.00% | 0.099  | PTHR10489:SF567 (PANTHER); PTHR10489 (PANTHER)                                                                                                                                                                                                                                                                                                                                           |
| 424 | c144399_g1_i1_len_165_path_1_0_164_4                                | 1   | low-density lipoprotein                                   | 55  | 3.06E-14  | 73.20% | 0.126  | IPR001881 (SMART); IPR001881 (PFAM); G3DSA:2.10.25.10 (GENE3D); PTHR10529 (PANTHER); PTHR10529:SF210 (PANTHER); IPR013032 (PROSITE_PATTERNS); IPR018097 (PROSITE_PATTERNS); IPR000152 (PROSITE_PATTERNS); SSF57196 (SUPERFAMILY)                                                                                                                                                         |
| 425 | c14479_g1_i1_len_1311_path_1_0_208_210_209_504_506_505_1310_2       | 210 | protein spaetzle                                          | 437 | 2.21E-28  | 54.20% | 0.245  | PTHR23199 (PANTHER); IPR029034 (SUPERFAMILY)                                                                                                                                                                                                                                                                                                                                             |
| 426 | c14479_g1_i2_len_1015_path_1_0_208_506_209_1014_0                   | 122 | spaetzle 1-2 isoform x1                                   | 339 | 1.61E-21  | 54.40% | 0.471Y | PTHR23199 (PANTHER); SignalP-noTM (SIGNALP_EUK); IPR029034 (SUPERFAMILY)                                                                                                                                                                                                                                                                                                                 |
| 427 | c14493_g1_i1_len_837_path_1_0_836_4                                 | 43  | alpha-mannosidase 2                                       | 279 | 9.21E-139 | 78.50% | 0.102  | IPR015341 (SMART); IPR015341 (PFAM); IPR000602 (PFAM); IPR027291 (G3DSA:3.20.110.GENE3D); IPR015341 (G3DSA:1.20.1270.GENE3D); PTHR11607:SF22 (PANTHER); PTHR11607 (PANTHER); IPR011330 (SUPERFAMILY); IPR028995 (SUPERFAMILY)                                                                                                                                                            |
| 428 | c14493_g2_i1_len_1087_path_1629_0_1086_1                            | 40  | alpha-mannosidase 2                                       | 362 | 7.74E-167 | 73.80% | 0.370Y | IPR000602 (PFAM); IPR027291 (G3DSA:3.20.110.GENE3D); PTHR11607 (PANTHER); PTHR11607:SF22 (PANTHER); CYTOPLASMIC_DOMAIN (PHOBIUS); TRANSMEMBRANE (PHOBIUS); NON_CYTOPLASMIC_DOMAIN (PHOBIUS); IPR011330 (SUPERFAMILY); TMhelix (TMHMM)                                                                                                                                                    |
| 429 | c145096_g1_i1_len_363_path_341_0_362_1                              | 6   | zinc finger protein 678-like                              | 121 | 1.09E-39  | 69.30% | 0.105  | IPR015880 (SMART); IPR013087 (G3DSA:3.30.160.GENE3D); IPR013087 (G3DSA:3.30.160.GENE3D); PF13465 (PFAM); PTHR24409 (PANTHER); IPR007087 (PROSITE_PATTERNS); IPR007087 (PROSITE_PATTERNS); IPR007087 (PROSITE_PROFILES); IPR007087 (PROSITE_PROFILES); IPR007087 (PROSITE_PROFILES); IPR007087 (PROSITE_PROFILES); SSF57667 (SUPERFAMILY); SSF57667 (SUPERFAMILY); SSF57667 (SUPERFAMILY) |
| 430 | c145103_g1_i1_len_1155_path_1133_0_1154_0                           | 29  | 85 88 kda calcium-independent phospholipase a2 isoform x1 | 385 | 4.92E-137 | 68.80% | 0.178  | IPR002110 (SMART); IPR020683 (G3DSA:1.25.40.GENE3D); IPR002641 (PFAM); IPR020683 (PFAM); G3DSA:3.40.1090.10 (GENE3D); PTHR24139 (PANTHER); PTHR24139:SF33 (PANTHER); IPR002110 (PROSITE_PROFILES); IPR002110 (PROSITE_PROFILES); IPR020683 (PROSITE_PROFILES); IPR020683 (SUPERFAMILY); IPR016035 (SUPERFAMILY)                                                                          |
| 431 | c145113_g1_i1_len_2339_path_1_0_2338_5                              | 284 | scabrous protein                                          | 779 | 6.61E-118 | 51.80% | 0.096  | Coil (COILS); Coil (COILS); Coil (COILS); Coil (COILS); Coil (COILS); Coil (COILS); IPR002181 (SMART); IPR014716 (G3DSA:3.90.215.GENE3D); IPR002181 (PFAM); IPR014715 (G3DSA:4.10.530.GENE3D); PTHR19143 (PANTHER); IPR002181 (PROSITE_PROFILES); IPR002181 (SUPERFAMILY)                                                                                                                |



|     |                                                        |     |                                                                                                                                |     |           |        |       |                                                                                                                                                                                                                                                                                                                                                                                                                                                                                                                                                                                                                                                                                                                                          |
|-----|--------------------------------------------------------|-----|--------------------------------------------------------------------------------------------------------------------------------|-----|-----------|--------|-------|------------------------------------------------------------------------------------------------------------------------------------------------------------------------------------------------------------------------------------------------------------------------------------------------------------------------------------------------------------------------------------------------------------------------------------------------------------------------------------------------------------------------------------------------------------------------------------------------------------------------------------------------------------------------------------------------------------------------------------------|
| 432 | c145223_g1_i1_len_975_path_953_0_974_2                 | 39  | cgmp-dependent protein isozyme 2 forms cd4 t1 t3a t3b-like isoform x3                                                          | 325 | 0         | 91.50% | 0.1   | IPR002290 (SMART); IPR000961 (SMART); G3DSA:1.10.510.10 (GENE3D); G3DSA:3.30.200.20 (GENE3D); IPR000719 (PFAM); PTHR24353:SF65 (PANTHER); PTHR24353 (PANTHER); IPR008271 (PROSITE_PATTERNS); IPR000719 (PROSITE_PROFILES); IPR000961 (PROSITE_PROFILES); IPR011009 (SUPERFAMILY)                                                                                                                                                                                                                                                                                                                                                                                                                                                         |
| 433 | c145247_g1_i1_len_1424_path_1_0_1423_4                 | 63  | limulus clotting factor partial                                                                                                | 475 | 1.50E-68  | 56.90% | 0.115 | IPR001314 (PRINTS); IPR001881 (SMART); IPR001254 (SMART); G3DSA:2.40.10.10 (GENE3D); G3DSA:2.40.10.10 (GENE3D); G3DSA:2.10.25.10 (GENE3D); IPR001254 (PFAM); G3DSA:2.40.10.10 (GENE3D); PTHR24260 (PANTHER); IPR018114 (PROSITE_PATTERNS); IPR018114 (PROSITE_PATTERNS); IPR013032 (PROSITE_PATTERNS); IPR001254 (PROSITE_PROFILES); IPR000436 (PROSITE_PROFILES); SSF57196 (SUPERFAMILY); IPR009003 (SUPERFAMILY)                                                                                                                                                                                                                                                                                                                       |
| 434 | c145250_g1_i1_len_1684_path_1662_0_1683_0              | 584 | calumenin                                                                                                                      | 562 | 1.24E-155 | 79.90% | 0.137 | IPR002048 (SMART); IPR011992 (PFAM); IPR002048 (PFAM); IPR011992 (G3DSA:1.10.238.GENE3D); PTHR10827 (PANTHER); IPR027239 (PTHR10827:PANTHER); IPR018247 (PROSITE_PATTERNS); IPR018247 (PROSITE_PATTERNS); IPR018247 (PROSITE_PATTERNS); IPR018247 (PROSITE_PATTERNS); CYTOPLASMIC_DOMAIN (PHOBIUS); NON_CYTOPLASMIC_DOMAIN (PHOBIUS); TRANSMEMBRANE (PHOBIUS); TRANSMEMBRANE (PHOBIUS); TRANSMEMBRANE (PHOBIUS); NON_CYTOPLASMIC_DOMAIN (PHOBIUS); CYTOPLASMIC_DOMAIN (PHOBIUS); IPR002048 (PROSITE_PROFILES); IPR002048 (PROSITE_PROFILES); IPR002048 (PROSITE_PROFILES); IPR002048 (PROSITE_PROFILES); IPR002048 (PROSITE_PROFILES); SSF47473 (SUPERFAMILY); SSF47473 (SUPERFAMILY); TMhelix (TMHMM); TMhelix (TMHMM); TMhelix (TMHMM) |
| 435 | c14529_g1_i1_len_604_path_582_0_125_708_126_603_5      | 19  | lysosomal pro-x carboxypeptidase-like                                                                                          | 201 | 1.02E-18  | 77.90% | 0.208 | IPR008758 (PFAM); IPR008758 (PANTHER); PTHR11010:SF11 (PANTHER); CYTOPLASMIC_DOMAIN (PHOBIUS); NON_CYTOPLASMIC_DOMAIN (PHOBIUS); TRANSMEMBRANE (PHOBIUS); TMhelix (TMHMM)                                                                                                                                                                                                                                                                                                                                                                                                                                                                                                                                                                |
| 436 | c145309_g1_i1_len_1107_path_1085_0_1106_1              | 62  | adp-ribosylation factor-related protein 1                                                                                      | 369 | 6.82E-125 | 94.60% | 0.103 | IPR001806 (PRINTS); IPR003579 (SMART); IPR006687 (SMART); IPR024156 (SMART); IPR006689 (PFAM); IPR005225 (TIGRFAM); IPR027417 (G3DSA:3.40.50.GENE3D); PTHR11711 (PANTHER); PTHR11711:SF19 (PANTHER); IPR024156 (PROSITE_PROFILES); IPR027417 (SUPERFAMILY); TMhelix (TMHMM)                                                                                                                                                                                                                                                                                                                                                                                                                                                              |
| 437 | c145327_g1_i1_len_2269_path_2247_0_2268_0              | 405 | aspartate--trna cytoplasmic                                                                                                    | 757 | 0         | 85.30% | 0.231 | Coil (COILS); IPR002312 (PRINTS); G3DSA:3.30.930.10 (GENE3D); IPR004523 (TIGRFAM); IPR004364 (PFAM); IPR012340 (G3DSA:2.40.50.GENE3D); IPR004365 (PFAM); IPR018150 (PANTHER); IPR004523 (PTHR22594:PANTHER); NON_CYTOPLASMIC_DOMAIN (PHOBIUS); NON_CYTOPLASMIC_DOMAIN (PHOBIUS); CYTOPLASMIC_DOMAIN (PHOBIUS); CYTOPLASMIC_DOMAIN (PHOBIUS); TRANSMEMBRANE (PHOBIUS); TRANSMEMBRANE (PHOBIUS); TRANSMEMBRANE (PHOBIUS); IPR006195 (PROSITE_PROFILES); SSF55681 (SUPERFAMILY); IPR012340 (SUPERFAMILY)                                                                                                                                                                                                                                    |
| 439 | c14541_g2_i1_len_671_path_899_0_670_1                  | 20  | 26s protease regulatory subunit 6a-b                                                                                           | 224 | 5.31E-155 | 98.20% | 0.16  | IPR003593 (SMART); IPR027417 (G3DSA:3.40.50.GENE3D); IPR003959 (PFAM); PTHR23073 (PANTHER); PTHR23073:SF7 (PANTHER); IPR027417 (SUPERFAMILY)                                                                                                                                                                                                                                                                                                                                                                                                                                                                                                                                                                                             |
| 438 | c145419_g1_i1_len_582_path_560_0_581_0                 | 22  | achain structural determinants for improved thermal stability of designed ankyrin repeat proteins with a redesigned c- capping | 194 | 2.49E-22  | 53.70% | 0.11  | IPR002110 (SMART); IPR020683 (PFAM); IPR020683 (G3DSA:1.25.40.GENE3D); PTHR24198 (PANTHER); IPR002110 (PROSITE_PROFILES); IPR020683 (PROSITE_PROFILES); IPR002110 (PROSITE_PROFILES); IPR002110 (PROSITE_PROFILES); IPR002110 (PROSITE_PROFILES); IPR020683 (SUPERFAMILY)                                                                                                                                                                                                                                                                                                                                                                                                                                                                |
| 440 | c14555_g1_i1_len_642_path_2469_0_15_186_6_16_641_4     | 20  | leucine-rich repeat-containing protein 70 isoform x1                                                                           | 214 | 1.68E-15  | 48.20% | 0.111 | IPR003591 (SMART); IPR001611 (PFAM); G3DSA:3.80.10.10 (GENE3D); IPR001611 (PFAM); PTHR24369 (PANTHER); SSF52058 (SUPERFAMILY)                                                                                                                                                                                                                                                                                                                                                                                                                                                                                                                                                                                                            |
| 441 | c14555_g1_i2_len_1257_path_1235_0_630_1_866_631_1256_4 | 70  | leucine-rich repeat-containing protein 70 isoform x1                                                                           | 419 | 5.82E-15  | 50.30% | 0.111 | IPR003591 (SMART); IPR001611 (PFAM); G3DSA:3.80.10.10 (GENE3D); IPR001611 (PFAM); PTHR24369 (PANTHER); NON_CYTOPLASMIC_DOMAIN (PHOBIUS); TRANSMEMBRANE (PHOBIUS); CYTOPLASMIC_DOMAIN (PHOBIUS); NON_CYTOPLASMIC_DOMAIN (PHOBIUS); CYTOPLASMIC_DOMAIN (PHOBIUS); TRANSMEMBRANE (PHOBIUS); TRANSMEMBRANE (PHOBIUS); SSF52058 (SUPERFAMILY); TMhelix (TMHMM); TMhelix (TMHMM); TMhelix (TMHMM)                                                                                                                                                                                                                                                                                                                                              |

|     |                                                                  |     |                                                                                                                                                                                |     |           |        |        |                                                                                                                                                                                                                                                                                                                                                                                                                                                                             |
|-----|------------------------------------------------------------------|-----|--------------------------------------------------------------------------------------------------------------------------------------------------------------------------------|-----|-----------|--------|--------|-----------------------------------------------------------------------------------------------------------------------------------------------------------------------------------------------------------------------------------------------------------------------------------------------------------------------------------------------------------------------------------------------------------------------------------------------------------------------------|
| 443 | c14560_g1_i1_len_892_path_870_0_751_162_2_752_771_1642_772_891_1 | 465 | pacifastin light chain                                                                                                                                                         | 297 | 1.23E-27  | 44.60% | 0.375Y | IPR006552 (SMART); IPR008037 (PFAM); IPR020862 (PROSITE_PROFILES); IPR020862 (PROSITE_PROFILES); IPR020862 (PROSITE_PROFILES); IPR020862 (PROSITE_PROFILES); IPR008037 (SUPERFAMILY); IPR008037 (SUPERFAMILY); IPR008037 (SUPERFAMILY); IPR008037 (SUPERFAMILY); IPR008037 (SUPERFAMILY); IPR012341 (G3DSA:1.50.10.GENE3D); IPR001701 (PFAM); PTHR22298 (PANTHER); PTHR22298:SF17 (PANTHER); IPR008928 (SUPERFAMILY)                                                        |
| 442 | c145602_g1_i1_len_283_path_1_0_282_5                             | 12  | endo-beta- - partial                                                                                                                                                           | 94  | 3.24E-28  | 71.50% | 0.115  | IPR020472 (PRINTS); IPR001680 (SMART); IPR001680 (PFAM); IPR015943 (G3DSA:2.130.10.GENE3D); PTHR19923:SF0 (PANTHER); PTHR19923 (PANTHER); IPR019775 (PROSITE_PATTERNS); IPR001680 (PROSITE_PROFILES); IPR017986 (PROSITE_PROFILES); IPR001680 (PROSITE_PROFILES); IPR001680 (PROSITE_PROFILES); IPR017986 (SUPERFAMILY)                                                                                                                                                     |
| 444 | c145625_g1_i1_len_853_path_1_0_852_4                             | 34  | pleiotropic regulator 1                                                                                                                                                        | 284 | 2.53E-118 | 73.00% | 0.101  | IPR002049 (SMART); G3DSA:2.10.25.10 (GENE3D); IPR002049 (PFAM); G3DSA:2.10.25.10 (GENE3D); PTHR10574 (PANTHER); PTHR10574:SF39 (PANTHER); IPR002049 (PROSITE_PATTERNS); IPR002049 (PROSITE_PATTERNS); IPR002049 (PROSITE_PROFILES); IPR002049 (PROSITE_PROFILES); IPR002049 (PROSITE_PROFILES); SSF57196 (SUPERFAMILY); SSF57196 (SUPERFAMILY)                                                                                                                              |
| 445 | c145638_g1_i1_len_472_path_1_0_471_1                             | 10  | laminin subunit alpha                                                                                                                                                          | 157 | 6.13E-66  | 78.50% | 0.117  | IPR000209 (PFAM); IPR000209 (G3DSA:3.40.50.GENE3D); IPR015500 (PANTHER); PTHR10795:SF71 (PANTHER); IPR000209 (SUPERFAMILY)                                                                                                                                                                                                                                                                                                                                                  |
| 446 | c145641_g1_i1_len_298_path_276_0_297_2                           | 5   | furin-like protease isoform 1-crr isoform x3                                                                                                                                   | 99  | 2.22E-56  | 96.90% | 0.106  | IPR000998 (SMART); IPR000436 (SMART); G3DSA:2.10.70.10 (GENE3D); IPR000436 (PFAM); IPR000998 (PFAM); PTHR23282 (PANTHER); IPR000436 (PROSITE_PROFILES); IPR000436 (PROSITE_PROFILES); IPR000998 (PROSITE_PROFILES); IPR013320 (SUPERFAMILY); IPR000436 (SUPERFAMILY)                                                                                                                                                                                                        |
| 447 | c145728_g1_i1_len_607_path_585_0_606_2                           | 14  | mam and ldl-receptor class a domain-containing protein 2-like                                                                                                                  | 202 | 7.45E-64  | 66.10% | 0.124  | IPR022086 (PFAM); TRANSMEMBRANE (PHOBIUS); NON_CYTOPLASMIC_DOMAIN (PHOBIUS); CYTOPLASMIC_DOMAIN (PHOBIUS); NON_CYTOPLASMIC_DOMAIN (PHOBIUS); CYTOPLASMIC_DOMAIN (PHOBIUS); TRANSMEMBRANE (PHOBIUS); TRANSMEMBRANE (PHOBIUS); TRANSMEMBRANE (PHOBIUS); TMhelix (TMHMM); TMhelix (TMHMM)                                                                                                                                                                                      |
| 448 | c145755_g1_i1_len_2626_path_2604_0_2625_3                        | 197 | membrane skeletal                                                                                                                                                              | 876 | 1.04E-37  | 63.80% | 0.162  | Coil (COILS); Coil (COILS); Coil (COILS); Coil (COILS); PTHR18937 (PANTHER); IPR027120 (PTHR18937:PANTHER)                                                                                                                                                                                                                                                                                                                                                                  |
| 449 | c145775_g1_i1_len_949_path_927_0_948_3                           | 56  | structural maintenance of chromosomes protein 2                                                                                                                                | 317 | 6.69E-87  | 71.70% | 0.1    | IPR000242 (PRINTS); IPR000242 (SMART); IPR029021 (G3DSA:3.90.190.GENE3D); IPR000242 (PFAM); PTHR19134 (PANTHER); IPR000242 (PROSITE_PROFILES); IPR029021 (SUPERFAMILY)                                                                                                                                                                                                                                                                                                      |
| 450 | c145782_g1_i1_len_494_path_472_0_493_0                           | 18  | receptor-type tyrosine-protein phosphatase kappa                                                                                                                               | 165 | 3.50E-42  | 66.60% | 0.106  | IPR011682 (PFAM); IPR013780 (G3DSA:2.60.40.GENE3D); G3DSA:2.70.98.30 (GENE3D); PTHR11607 (PANTHER); PTHR11607:SF22 (PANTHER); IPR011013 (SUPERFAMILY)                                                                                                                                                                                                                                                                                                                       |
| 451 | c145793_g1_i1_len_1492_path_1470_0_1491_1                        | 130 | alpha-mannosidase 2                                                                                                                                                            | 497 | 0         | 70.50% | 0.125  | IPR020472 (PRINTS); IPR001680 (SMART); IPR003613 (SMART); IPR003613 (PFAM); IPR013915 (PFAM); IPR015943 (G3DSA:2.130.10.GENE3D); IPR001680 (PFAM); IPR013083 (G3DSA:3.30.40.GENE3D); PTHR13889 (PANTHER); IPR019775 (PROSITE_PATTERNS); IPR019775 (PROSITE_PATTERNS); IPR001680 (PROSITE_PROFILES); IPR001680 (PROSITE_PROFILES); IPR017986 (PROSITE_PROFILES); IPR001680 (PROSITE_PROFILES); IPR003613 (PROSITE_PROFILES); IPR017986 (SUPERFAMILY); SSF57850 (SUPERFAMILY) |
| 452 | c145872_g1_i1_len_1655_path_1633_0_1654_1                        | 104 | pre-mrna-processing factor 19                                                                                                                                                  | 552 | 0         | 90.70% | 0.126  | IPR000998 (PRINTS); IPR000998 (SMART); IPR000998 (PFAM); PTHR23282 (PANTHER); IPR000998 (PROSITE_PROFILES); IPR013320 (SUPERFAMILY)                                                                                                                                                                                                                                                                                                                                         |
| 453 | c145962_g1_i1_len_400_path_378_0_399_4                           | 8   | mlrp1_acrmi ame: full=mam and ldl-receptor class a domain-containing protein 1 ame: full=skeletal organic matrix mam and ldl-receptor 1 short=som mam and ldl-receptor partial | 133 | 1.77E-24  | 59.20% | 0.106  | IPR002290 (SMART); IPR000719 (PFAM); G3DSA:1.10.510.10 (GENE3D); PTHR24361:SF208 (PANTHER); PTHR24361 (PANTHER); IPR000719 (PROSITE_PROFILES); IPR011009 (SUPERFAMILY)                                                                                                                                                                                                                                                                                                      |
| 454 | c145986_g1_i1_len_431_path_1_0_430_4                             | 7   | serine threonine-protein kinase mst4 isoform x3                                                                                                                                | 144 | 2.39E-96  | 98.80% | 0.22   | Coil (COILS); Coil (COILS); Coil (COILS); Coil (COILS); IPR009730 (PFAM); PTHR15327:SF0 (PANTHER); IPR009730 (PANTHER)                                                                                                                                                                                                                                                                                                                                                      |
| 455 | c146014_g1_i1_len_1556_path_1_0_1555_0                           | 157 | microfibrillar-associated protein 1-like                                                                                                                                       | 519 | 3.24E-177 | 77.90% | 0.1    |                                                                                                                                                                                                                                                                                                                                                                                                                                                                             |

|  |  |  |  |  |  |  |  |  |                                                                                                                                                                                                                                                                                                                                                                                                                                                                                                                                                                                                                                                                                                                                                                                                                                                                                                                                                                                                                                                                                                                                                                                                                                                                                                                                                                                                                                                                                                                                                                                                                                                                                                                                                                                                                                                                                                                                                                                                                                                                                                                                                                                                                                                                                                                                                                                                                                                                                                                                                                                                                                                                                                                                                                                                                                                                                                                                                                                                                                                                                                                                                                                                                                                                                                                                                                                                                                                                                                                                                                                                                                                                                                                                                                                                                                                                                                                                                                                                                                                                                                                                                                                                                                                                                                                                                                                                                                                                                                                                                                                                                                                                                                                                                                                                                                                                                                                                                                                                                                                                                                                                                                                                                                                                                                                                                                                                                                                                                                                                                                                                                                                                                                                                                                                                                                                                                                                                                                                                                                                                                                                                                                                                                                                                                                                                                                                                                                                                                                                                                                                                                                                                                                                                                                                                                                                                                                                                                                                                                                                                                                                                                                                                                                                                                                                                                                                                                                                                                                                                                                                                                                                                                                                                                                                                                                                                                                                                                                                                                                                                                                                                                                                                                                                                                                                                                                                                                                                                                                                                                                                                                                                                                                                                                                                                                                                                                                                                                                                                                                                                                                                                                                                                                                                                                                                                                                                                                                                                                                                                                                                                                                                                                                                                                                                                                                                                                                                                                                                                                                                                                                                                                                                                                                                                                                                                                                                                                                                                                                                                                                                                                                                                                                                                                                                                                                                                                                                                                                                                                                                                                                                                                                                                                                                                                                                                                                                                                                                                                                                                                                                                                                                                                                                                                                                                                                                                                                                                                                                                                                                                                                                                                                                                                                                                                                                                                                                                                                                                                                                                                                                                                                                                                                                                                                                                                                                                                                                                              |
|--|--|--|--|--|--|--|--|--|----------------------------------------------------------------------------------------------------------------------------------------------------------------------------------------------------------------------------------------------------------------------------------------------------------------------------------------------------------------------------------------------------------------------------------------------------------------------------------------------------------------------------------------------------------------------------------------------------------------------------------------------------------------------------------------------------------------------------------------------------------------------------------------------------------------------------------------------------------------------------------------------------------------------------------------------------------------------------------------------------------------------------------------------------------------------------------------------------------------------------------------------------------------------------------------------------------------------------------------------------------------------------------------------------------------------------------------------------------------------------------------------------------------------------------------------------------------------------------------------------------------------------------------------------------------------------------------------------------------------------------------------------------------------------------------------------------------------------------------------------------------------------------------------------------------------------------------------------------------------------------------------------------------------------------------------------------------------------------------------------------------------------------------------------------------------------------------------------------------------------------------------------------------------------------------------------------------------------------------------------------------------------------------------------------------------------------------------------------------------------------------------------------------------------------------------------------------------------------------------------------------------------------------------------------------------------------------------------------------------------------------------------------------------------------------------------------------------------------------------------------------------------------------------------------------------------------------------------------------------------------------------------------------------------------------------------------------------------------------------------------------------------------------------------------------------------------------------------------------------------------------------------------------------------------------------------------------------------------------------------------------------------------------------------------------------------------------------------------------------------------------------------------------------------------------------------------------------------------------------------------------------------------------------------------------------------------------------------------------------------------------------------------------------------------------------------------------------------------------------------------------------------------------------------------------------------------------------------------------------------------------------------------------------------------------------------------------------------------------------------------------------------------------------------------------------------------------------------------------------------------------------------------------------------------------------------------------------------------------------------------------------------------------------------------------------------------------------------------------------------------------------------------------------------------------------------------------------------------------------------------------------------------------------------------------------------------------------------------------------------------------------------------------------------------------------------------------------------------------------------------------------------------------------------------------------------------------------------------------------------------------------------------------------------------------------------------------------------------------------------------------------------------------------------------------------------------------------------------------------------------------------------------------------------------------------------------------------------------------------------------------------------------------------------------------------------------------------------------------------------------------------------------------------------------------------------------------------------------------------------------------------------------------------------------------------------------------------------------------------------------------------------------------------------------------------------------------------------------------------------------------------------------------------------------------------------------------------------------------------------------------------------------------------------------------------------------------------------------------------------------------------------------------------------------------------------------------------------------------------------------------------------------------------------------------------------------------------------------------------------------------------------------------------------------------------------------------------------------------------------------------------------------------------------------------------------------------------------------------------------------------------------------------------------------------------------------------------------------------------------------------------------------------------------------------------------------------------------------------------------------------------------------------------------------------------------------------------------------------------------------------------------------------------------------------------------------------------------------------------------------------------------------------------------------------------------------------------------------------------------------------------------------------------------------------------------------------------------------------------------------------------------------------------------------------------------------------------------------------------------------------------------------------------------------------------------------------------------------------------------------------------------------------------------------------------------------------------------------------------------------------------------------------------------------------------------------------------------------------------------------------------------------------------------------------------------------------------------------------------------------------------------------------------------------------------------------------------------------------------------------------------------------------------------------------------------------------------------------------------------------------------------------------------------------------------------------------------------------------------------------------------------------------------------------------------------------------------------------------------------------------------------------------------------------------------------------------------------------------------------------------------------------------------------------------------------------------------------------------------------------------------------------------------------------------------------------------------------------------------------------------------------------------------------------------------------------------------------------------------------------------------------------------------------------------------------------------------------------------------------------------------------------------------------------------------------------------------------------------------------------------------------------------------------------------------------------------------------------------------------------------------------------------------------------------------------------------------------------------------------------------------------------------------------------------------------------------------------------------------------------------------------------------------------------------------------------------------------------------------------------------------------------------------------------------------------------------------------------------------------------------------------------------------------------------------------------------------------------------------------------------------------------------------------------------------------------------------------------------------------------------------------------------------------------------------------------------------------------------------------------------------------------------------------------------------------------------------------------------------------------------------------------------------------------------------------------------------------------------------------------------------------------------------------------------------------------------------------------------------------------------------------------------------------------------------------------------------------------------------------------------------------------------------------------------------------------------------------------------------------------------------------------------------------------------------------------------------------------------------------------------------------------------------------------------------------------------------------------------------------------------------------------------------------------------------------------------------------------------------------------------------------------------------------------------------------------------------------------------------------------------------------------------------------------------------------------------------------------------------------------------------------------------------------------------------------------------------------------------------------------------------------------------------------------------------------------------------------------------------------------------------------------------------------------------------------------------------------------------------------------------------------------------------------------------------------------------------------------------------------------------------------------------------------------------------------------------------------------------------------------------------------------------------------------------------------------------------------------------------------------------------------------------------------------------------------------------------------------------------------------------------------------------------------------------------------------------------------------------------------------------------------------------------------------------------------------------------------------------------------------------------------------------------------------------------------------------------------------------------------------------------------------------------------------------------------------------------------------------------------------------------------------------------------------------------------------------------------------------------------------------------------------------------------------------------|
|  |  |  |  |  |  |  |  |  | Coil (COILS); IPR020472 (PRINTS); IPR001680 (SMART); IPR015943 (G3DSA:2.130.10.GENE3D); IPR007148 (PFAM); IPR001680 (PFAM); IPR015943 (G3DSA:2.130.10.GENE3D); PTHR19853 (PANTHER); PTHR19853:SF0 (PANTHER); IPR019775 (PROSITE_PATTERNS); IPR019775 (PROSITE_PATTERNS); IPR019775 (PROSITE_PATTERNS); CYTOPLASMIC_DOMAIN (PHOBIUS); TRANSMEMBRANE (PHOBIUS); NON_CYTOPLASMIC_DOMAIN (PHOBIUS); IPR001680 (PROSITE_PROFILES); IPR001680 (PRO |
|--|--|--|--|--|--|--|--|--|----------------------------------------------------------------------------------------------------------------------------------------------------------------------------------------------------------------------------------------------------------------------------------------------------------------------------------------------------------------------------------------------------------------------------------------------------------------------------------------------------------------------------------------------------------------------------------------------------------------------------------------------------------------------------------------------------------------------------------------------------------------------------------------------------------------------------------------------------------------------------------------------------------------------------------------------------------------------------------------------------------------------------------------------------------------------------------------------------------------------------------------------------------------------------------------------------------------------------------------------------------------------------------------------------------------------------------------------------------------------------------------------------------------------------------------------------------------------------------------------------------------------------------------------------------------------------------------------------------------------------------------------------------------------------------------------------------------------------------------------------------------------------------------------------------------------------------------------------------------------------------------------------------------------------------------------------------------------------------------------------------------------------------------------------------------------------------------------------------------------------------------------------------------------------------------------------------------------------------------------------------------------------------------------------------------------------------------------------------------------------------------------------------------------------------------------------------------------------------------------------------------------------------------------------------------------------------------------------------------------------------------------------------------------------------------------------------------------------------------------------------------------------------------------------------------------------------------------------------------------------------------------------------------------------------------------------------------------------------------------------------------------------------------------------------------------------------------------------------------------------------------------------------------------------------------------------------------------------------------------------------------------------------------------------------------------------------------------------------------------------------------------------------------------------------------------------------------------------------------------------------------------------------------------------------------------------------------------------------------------------------------------------------------------------------------------------------------------------------------------------------------------------------------------------------------------------------------------------------------------------------------------------------------------------------------------------------------------------------------------------------------------------------------------------------------------------------------------------------------------------------------------------------------------------------------------------------------------------------------------------------------------------------------------------------------------------------------------------------------------------------------------------------------------------------------------------------------------------------------------------------------------------------------------------------------------------------------------------------------------------------------------------------------------------------------------------------------------------------------------------------------------------------------------------------------------------------------------------------------------------------------------------------------------------------------------------------------------------------------------------------------------------------------------------------------------------------------------------------------------------------------------------------------------------------------------------------------------------------------------------------------------------------------------------------------------------------------------------------------------------------------------------------------------------------------------------------------------------------------------------------------------------------------------------------------------------------------------------------------------------------------------------------------------------------------------------------------------------------------------------------------------------------------------------------------------------------------------------------------------------------------------------------------------------------------------------------------------------------------------------------------------------------------------------------------------------------------------------------------------------------------------------------------------------------------------------------------------------------------------------------------------------------------------------------------------------------------------------------------------------------------------------------------------------------------------------------------------------------------------------------------------------------------------------------------------------------------------------------------------------------------------------------------------------------------------------------------------------------------------------------------------------------------------------------------------------------------------------------------------------------------------------------------------------------------------------------------------------------------------------------------------------------------------------------------------------------------------------------------------------------------------------------------------------------------------------------------------------------------------------------------------------------------------------------------------------------------------------------------------------------------------------------------------------------------------------------------------------------------------------------------------------------------------------------------------------------------------------------------------------------------------------------------------------------------------------------------------------------------------------------------------------------------------------------------------------------------------------------------------------------------------------------------------------------------------------------------------------------------------------------------------------------------------------------------------------------------------------------------------------------------------------------------------------------------------------------------------------------------------------------------------------------------------------------------------------------------------------------------------------------------------------------------------------------------------------------------------------------------------------------------------------------------------------------------------------------------------------------------------------------------------------------------------------------------------------------------------------------------------------------------------------------------------------------------------------------------------------------------------------------------------------------------------------------------------------------------------------------------------------------------------------------------------------------------------------------------------------------------------------------------------------------------------------------------------------------------------------------------------------------------------------------------------------------------------------------------------------------------------------------------------------------------------------------------------------------------------------------------------------------------------------------------------------------------------------------------------------------------------------------------------------------------------------------------------------------------------------------------------------------------------------------------------------------------------------------------------------------------------------------------------------------------------------------------------------------------------------------------------------------------------------------------------------------------------------------------------------------------------------------------------------------------------------------------------------------------------------------------------------------------------------------------------------------------------------------------------------------------------------------------------------------------------------------------------------------------------------------------------------------------------------------------------------------------------------------------------------------------------------------------------------------------------------------------------------------------------------------------------------------------------------------------------------------------------------------------------------------------------------------------------------------------------------------------------------------------------------------------------------------------------------------------------------------------------------------------------------------------------------------------------------------------------------------------------------------------------------------------------------------------------------------------------------------------------------------------------------------------------------------------------------------------------------------------------------------------------------------------------------------------------------------------------------------------------------------------------------------------------------------------------------------------------------------------------------------------------------------------------------------------------------------------------------------------------------------------------------------------------------------------------------------------------------------------------------------------------------------------------------------------------------------------------------------------------------------------------------------------------------------------------------------------------------------------------------------------------------------------------------------------------------------------------------------------------------------------------------------------------------------------------------------------------------------------------------------------------------------------------------------------------------------------------------------------------------------------------------------------------------------------------------------------------------------------------------------------------------------------------------------------------------------------------------------------------------------------------------------------------------------------------------------------------------------------------|

|     |                                                                                        |      |                                                                                                 |     |           |        |        |                                                                                                                                                                                                                                                                                                                                                                                                                                                                               |
|-----|----------------------------------------------------------------------------------------|------|-------------------------------------------------------------------------------------------------|-----|-----------|--------|--------|-------------------------------------------------------------------------------------------------------------------------------------------------------------------------------------------------------------------------------------------------------------------------------------------------------------------------------------------------------------------------------------------------------------------------------------------------------------------------------|
| 470 | c14636_g2_i1_len_332_path_514_0_331_3                                                  | 6    | serine threonine-protein kinase 10 isoform x1                                                   | 111 | 2.33E-64  | 96.00% | 0.102  | IPR002290 (SMART); IPR000719 (PFAM); G3DSA:1.10.510.10 (GENE3D); PTHR24361:SF249 (PANTHER); PTHR24361 (PANTHER); IPR008271 (PROSITE_PATTERNS); IPR000719 (PROSITE_PROFILES); IPR011009 (SUPERFAMILY)                                                                                                                                                                                                                                                                          |
| 469 | c146364_g1_i1_len_1278_path_1243_0_1223_2467_1224_1241_2467_1242_1259_2467_1260_1277_2 | 58   | cyclin-g-associated kinase-like                                                                 | 426 | 1.04E-153 | 77.00% | 0.159  | IPR002290 (SMART); G3DSA:3.30.200.20 (GENE3D); G3DSA:1.10.510.10 (GENE3D); IPR000719 (PFAM); PTHR23172:SF19 (PANTHER); PTHR23172 (PANTHER); IPR008271 (PROSITE_PATTERNS); IPR000719 (PROSITE_PROFILES); IPR011009 (SUPERFAMILY)                                                                                                                                                                                                                                               |
| 471 | c146396_g1_i1_len_806_path_784_0_805_5                                                 | 30   | omega-amidase nit2-like                                                                         | 268 | 5.87E-145 | 83.30% | 0.107  | IPR003010 (G3DSA:3.60.110.GENE3D); IPR003010 (PFAM); PTHR23088:SF20 (PANTHER); PTHR23088 (PANTHER); IPR003010 (PROSITE_PROFILES); IPR003010 (SUPERFAMILY)                                                                                                                                                                                                                                                                                                                     |
| 472 | c146430_g1_i1_len_233_path_211_0_232_2                                                 | 5    | prolyl 4- beta subunit                                                                          | 77  | 6.18E-18  | 70.20% | 0.113  | IPR012336 (G3DSA:3.40.30.GENE3D); PTHR18929:SF74 (PANTHER); PTHR18929 (PANTHER); IPR012336 (SUPERFAMILY)                                                                                                                                                                                                                                                                                                                                                                      |
| 473 | c146452_g1_i1_len_278_path_1_0_277_0                                                   | 4    | transient receptor potential channel pyrexia                                                    | 93  | 8.82E-18  | 68.80% | 0.139  | IPR002110 (SMART); IPR020683 (G3DSA:1.25.40.GENE3D); IPR020683 (PFAM); PTHR24193 (PANTHER); IPR002110 (PROSITE_PROFILES); IPR002110 (PROSITE_PROFILES); IPR020683 (PROSITE_PROFILES); IPR020683 (SUPERFAMILY)                                                                                                                                                                                                                                                                 |
| 474 | c146457_g1_i1_len_2142_path_2120_0_2141_4                                              | 168  | alpha-2-macroglobulin-like protein 1 isoform x1                                                 | 714 | 5.40E-144 | 55.20% | 0.197  | IPR011625 (PFAM); IPR002890 (PFAM); PTHR11412 (PANTHER)                                                                                                                                                                                                                                                                                                                                                                                                                       |
| 475 | c146458_g1_i1_len_303_path_1_0_302_1                                                   | 5    | isoform c                                                                                       | 101 | 8.27E-25  | 67.60% | 0.123  | IPR014782 (PRINTS); G3DSA:1.10.390.10 (GENE3D); IPR014782 (PFAM); PTHR11533:SF165 (PANTHER); IPR001930 (PANTHER); SSF55486 (SUPERFAMILY)                                                                                                                                                                                                                                                                                                                                      |
| 477 | c14648_g1_i1_len_2505_path_1_0_2504_4                                                  | 278  | n-acetylated-alpha-linked acidic dipeptidase                                                    | 835 | 0         | 59.30% | 0.175  | IPR007365 (G3DSA:1.20.930.GENE3D); G3DSA:3.50.30.30 (GENE3D); IPR007365 (PFAM); IPR007484 (PFAM); IPR003137 (PFAM); G3DSA:3.40.630.10 (GENE3D); PTHR10404 (PANTHER); CYTOPLASMIC_DOMAIN (PHOBIUS); TRANSMEMBRANE (PHOBIUS); TRANSMEMBRANE (PHOBIUS); TRANSMEMBRANE (PHOBIUS); NON_CYTOPLASMIC_DOMAIN (PHOBIUS); NON_CYTOPLASMIC_DOMAIN (PHOBIUS); SSF53187 (SUPERFAMILY); IPR007365 (SUPERFAMILY); SSF52025 (SUPERFAMILY); TMhelix (TMHMM); TMhelix (TMHMM); TMhelix (TMHMM)  |
| 476 | c146489_g1_i1_len_416_path_394_0_415_3                                                 | 12   | phosphatidylinositol -trisphosphate 3-phosphatase and dual-specificity protein phosphatase pten | 139 | 2.98E-49  | 86.10% | 0.126  | IPR029021 (G3DSA:3.90.190.GENE3D); PTHR12305 (PANTHER); CYTOPLASMIC_DOMAIN (PHOBIUS); TRANSMEMBRANE (PHOBIUS); NON_CYTOPLASMIC_DOMAIN (PHOBIUS); IPR029023 (PROSITE_PROFILES); IPR029021 (SUPERFAMILY)                                                                                                                                                                                                                                                                        |
| 478 | c146509_g1_i1_len_852_path_1_0_851_3                                                   | 4885 | hemagglutinin amebocyte aggregation factor-like                                                 | 284 | 9.35E-38  | 58.00% | 0.147  | PF14704 (PFAM); IPR026645 (PANTHER); NON_CYTOPLASMIC_DOMAIN (PHOBIUS); CYTOPLASMIC_DOMAIN (PHOBIUS); TRANSMEMBRANE (PHOBIUS); TMhelix (TMHMM)                                                                                                                                                                                                                                                                                                                                 |
| 479 | c146512_g1_i1_len_531_path_1_0_530_1                                                   | 16   | ectonucleoside triphosphate diphosphohydrolase 7                                                | 177 | 5.87E-29  | 75.20% | 0.108  | IPR000407 (PFAM); IPR000407 (PANTHER); PTHR11782:SF37 (PANTHER); CYTOPLASMIC_DOMAIN (PHOBIUS); NON_CYTOPLASMIC_DOMAIN (PHOBIUS); TRANSMEMBRANE (PHOBIUS); TMhelix (TMHMM)                                                                                                                                                                                                                                                                                                     |
| 480 | c14678_g1_i1_len_2191_path_2169_0_1289_3459_1290_1383_3553_1384_2190_4                 | 3230 | protein disulfide-isomerase a3                                                                  | 730 | 0         | 78.20% | 0.294  | PR00421 (PRINTS); IPR012336 (G3DSA:3.40.30.GENE3D); PF13848 (PFAM); IPR012336 (G3DSA:3.40.30.GENE3D); IPR013766 (PFAM); IPR005792 (TIGRFAM); IPR012336 (G3DSA:3.40.30.GENE3D); IPR005788 (TIGRFAM); PTHR18929:SF60 (PANTHER); PTHR18929 (PANTHER); IPR017937 (PROSITE_PATTERNS); IPR017937 (PROSITE_PATTERNS); IPR012336 (PROSITE_PROFILES); IPR012336 (PROSITE_PROFILES); IPR012336 (SUPERFAMILY); IPR012336 (SUPERFAMILY); IPR012336 (SUPERFAMILY); IPR012336 (SUPERFAMILY) |
| 481 | c146790_g1_i1_len_582_path_560_0_581_0                                                 | 20   | macrophage mannose receptor 1-like                                                              | 194 | 7.04E-30  | 52.00% | 0.370Y | IPR001304 (SMART); IPR016186 (G3DSA:3.10.100.GENE3D); IPR016186 (G3DSA:3.10.100.GENE3D); IPR001304 (PFAM); PTHR22803 (PANTHER); PTHR22803:SF16 (PANTHER); IPR018378 (PROSITE_PATTERNS); IPR001304 (PROSITE_PROFILES); IPR001304 (PROSITE_PROFILES); IPR016187 (SUPERFAMILY); IPR016187 (SUPERFAMILY)                                                                                                                                                                          |
| 482 | c146818_g1_i1_len_672_path_1_0_671_5                                                   | 17   | cyclin-dependent kinase 2 isoform x2                                                            | 224 | 3.05E-89  | 75.60% | 0.139  | IPR002290 (SMART); G3DSA:3.30.200.20 (GENE3D); G3DSA:1.10.510.10 (GENE3D); IPR000719 (PFAM); PTHR24056 (PANTHER); PTHR24056:SF168 (PANTHER); IPR017441 (PROSITE_PATTERNS); IPR008271 (PROSITE_PATTERNS); NON_CYTOPLASMIC_DOMAIN (PHOBIUS); CYTOPLASMIC_DOMAIN (PHOBIUS); TRANSMEMBRANE (PHOBIUS); IPR000719 (PROSITE_PROFILES); IPR011009 (SUPERFAMILY)                                                                                                                       |

|     |                                          |      |                                                                      |     |          |        |       |                                                                                                                                                                                                                                                                                                                                                                                                                                                                                                                                                                                                                                                                |
|-----|------------------------------------------|------|----------------------------------------------------------------------|-----|----------|--------|-------|----------------------------------------------------------------------------------------------------------------------------------------------------------------------------------------------------------------------------------------------------------------------------------------------------------------------------------------------------------------------------------------------------------------------------------------------------------------------------------------------------------------------------------------------------------------------------------------------------------------------------------------------------------------|
| 483 | c146826_g1_i1_len_375_path_353_0_374_3   | 6    | cysteine-rich motor neuron 1 partial                                 | 125 | 8.02E-38 | 67.40% | 0.128 | IPR001007 (SMART); IPR001007 (PFAM); G3DSA:2.10.70.10 (GENE3D); PTHR11339 (PANTHER); IPR001007 (PROSITE_PATTERNS); IPR001007 (PROSITE_PATTERNS); IPR001007 (PROSITE_PROFILES); IPR001007 (PROSITE_PROFILES); SSF57603 (SUPERFAMILY); SSF57603 (SUPERFAMILY)                                                                                                                                                                                                                                                                                                                                                                                                    |
| 484 | c146839_g1_i1_len_370_path_348_0_369_2   | 8    | slit homolog 2 protein                                               | 123 | 5.13E-57 | 81.50% | 0.123 | G3DSA:3.80.10.10 (GENE3D); PTHR24365:SF270 (PANTHER); PTHR24365 (PANTHER); SSF52058 (SUPERFAMILY)                                                                                                                                                                                                                                                                                                                                                                                                                                                                                                                                                              |
| 485 | c146855_g1_i1_len_267_path_245_0_266_2   | 4    | prolyl 3-hydroxylase 2-like isoform x1                               | 89  | 7.39E-29 | 73.50% | 0.186 | PTHR14049 (PANTHER)                                                                                                                                                                                                                                                                                                                                                                                                                                                                                                                                                                                                                                            |
| 486 | c146859_g1_i1_len_1128_path_1_0_1127_1   | 51   | insulin-like growth factor-binding protein complex acid labile chain | 376 | 3.44E-30 | 54.80% | 0.093 | G3DSA:3.80.10.10 (GENE3D); PTHR24369 (PANTHER); SSF52058 (SUPERFAMILY)                                                                                                                                                                                                                                                                                                                                                                                                                                                                                                                                                                                         |
| 487 | c146925_g1_i1_len_744_path_1_0_743_4     | 27   | adenylate cyclase type 9                                             | 248 | 1.04E-80 | 86.20% | 0.1   | IPR001054 (SMART); IPR001054 (PFAM); IPR001054 (G3DSA:3.30.70.GENE3D); PTHR11920:SF272 (PANTHER); PTHR11920 (PANTHER); IPR018297 (PROSITE_PATTERNS); CYTOPLASMIC_DOMAIN (PHOBIUS); NON_CYTOPLASMIC_DOMAIN (PHOBIUS); TRANSMEMBRANE (PHOBIUS); IPR001054 (PROSITE_PROFILES); IPR029787 (SUPERFAMILY); TMhelix (TMHMM)                                                                                                                                                                                                                                                                                                                                           |
| 488 | c146957_g1_i1_len_645_path_39_0_644_3    | 54   | low quality protein: tenascin                                        | 208 | 2.68E-28 | 63.50% | 0.12  | IPR002181 (SMART); IPR014715 (G3DSA:4.10.530.GENE3D); IPR014716 (G3DSA:3.90.215.GENE3D); IPR002181 (PFAM); PTHR19143 (PANTHER); IPR020837 (PROSITE_PATTERNS); IPR002181 (PROSITE_PROFILES); IPR002181 (SUPERFAMILY)                                                                                                                                                                                                                                                                                                                                                                                                                                            |
| 489 | c14700_g1_i1_len_2244_path_1_0_2243_0    | 271  | wd repeat-containing protein 36                                      | 748 | 0        | 70.10% | 0.192 | IPR001680 (SMART); IPR015943 (G3DSA:2.130.10.GENE3D); IPR001680 (PFAM); IPR007319 (PFAM); IPR015943 (G3DSA:2.130.10.GENE3D); PTHR13889:SF2 (PANTHER); PTHR13889 (PANTHER); IPR001680 (PROSITE_PROFILES); IPR001680 (PROSITE_PROFILES); IPR017986 (PROSITE_PROFILES); IPR001680 (PROSITE_PROFILES); IPR017986 (PROSITE_PROFILES); IPR001680 (PROSITE_PROFILES); IPR017986 (SUPERFAMILY)                                                                                                                                                                                                                                                                         |
| 490 | c147019_g1_i1_len_392_path_370_0_391_4   | 10   | protein yellow-like                                                  | 131 | 4.80E-22 | 58.60% | 0.11  | IPR017996 (PFAM); IPR011042 (G3DSA:2.120.10.GENE3D)                                                                                                                                                                                                                                                                                                                                                                                                                                                                                                                                                                                                            |
| 491 | c147039_g1_i1_len_1585_path_1_0_1584_2   | 1586 | d-aspartate oxidase                                                  | 528 | 1.45E-98 | 63.60% | 0.164 | IPR016040 (G3DSA:3.40.50.GENE3D); IPR006076 (PFAM); PTHR11530:SF0 (PANTHER); IPR023209 (PANTHER); IPR006181 (PROSITE_PATTERNS); SSF54373 (SUPERFAMILY); SSF51971 (SUPERFAMILY); TMhelix (TMHMM)                                                                                                                                                                                                                                                                                                                                                                                                                                                                |
| 492 | c147044_g1_i1_len_721_path_1_0_720_5     | 20   | gamma-glutamyltranspeptidase 1-like isoform x2                       | 240 | 4.18E-75 | 69.70% | 0.103 | IPR000101 (PRINTS); IPR000101 (PFAM); IPR000101 (PANTHER); PTHR11686:SF15 (PANTHER); IPR029055 (SUPERFAMILY)                                                                                                                                                                                                                                                                                                                                                                                                                                                                                                                                                   |
| 493 | c14706_g1_i1_len_1999_path_1977_0_1998_5 | 169  | myosin light chain smooth muscle                                     | 666 | 0        | 79.20% | 0.101 | Coil (COILS); IPR003599 (SMART); IPR003598 (SMART); IPR013098 (PFAM); IPR013783 (G3DSA:2.60.40.GENE3D); IPR013783 (G3DSA:2.60.40.GENE3D); IPR013783 (G3DSA:2.60.40.GENE3D); PF13895 (PFAM); IPR013783 (G3DSA:2.60.40.GENE3D); IPR013783 (G3DSA:2.60.40.GENE3D); PTHR19897 (PANTHER); IPR007110 (PROSITE_PROFILES); IPR007110 (PROSITE_PROFILES); IPR007110 (PROSITE_PROFILES); IPR007110 (PROSITE_PROFILES); SSF48726 (SUPERFAMILY); SSF48726 (SUPERFAMILY); SSF48726 (SUPERFAMILY); SSF48726 (SUPERFAMILY); SSF48726 (SUPERFAMILY)                                                                                                                            |
| 494 | c147164_g1_i1_len_742_path_720_0_741_0   | 12   | zinc finger protein 120-like isoform x1                              | 248 | 5.36E-70 | 67.20% | 0.1   | IPR015880 (SMART); IPR013087 (G3DSA:3.30.160.GENE3D); PF13465 (PFAM); IPR013087 (G3DSA:3.30.160.GENE3D); IPR013087 (G3DSA:3.30.160.GENE3D); IPR013087 (G3DSA:3.30.160.GENE3D); IPR007087 (PFAM); PTHR24409 (PANTHER); IPR007087 (PROSITE_PATTERNS); IPR007087 (PROSITE_PATTERNS); IPR007087 (PROSITE_PATTERNS); IPR007087 (PROSITE_PATTERNS); IPR007087 (PROSITE_PATTERNS); IPR007087 (PROSITE_PROFILES); IPR007087 (PROSITE_PROFILES); IPR007087 (PROSITE_PROFILES); IPR007087 (PROSITE_PROFILES); IPR007087 (PROSITE_PROFILES); IPR007087 (PROSITE_PROFILES); SSF57667 (SUPERFAMILY); SSF57667 (SUPERFAMILY); SSF57667 (SUPERFAMILY); SSF57667 (SUPERFAMILY) |
| 495 | c147180_g1_i1_len_310_path_288_0_309_4   | 4    | membrane metallo-endopeptidase-like 1                                | 103 | 9.85E-38 | 83.30% | 0.108 | IPR024079 (G3DSA:3.40.390.GENE3D); IPR018497 (PFAM); PTHR11733:SF111 (PANTHER); IPR000718 (PANTHER); SSF55486 (SUPERFAMILY)                                                                                                                                                                                                                                                                                                                                                                                                                                                                                                                                    |



|     |                                                          |      |                                                              |      |           |        |        |                                                                                                                                                                                                                                                                                                                                                                                                                                                                                                                                                                                                                                           |
|-----|----------------------------------------------------------|------|--------------------------------------------------------------|------|-----------|--------|--------|-------------------------------------------------------------------------------------------------------------------------------------------------------------------------------------------------------------------------------------------------------------------------------------------------------------------------------------------------------------------------------------------------------------------------------------------------------------------------------------------------------------------------------------------------------------------------------------------------------------------------------------------|
| 496 | c14719_g1_i1_len_1710_path_1_0_1644_358<br>3_1645_1709_4 | 3589 | cathepsin b                                                  | 570  | 3.64E-164 | 78.60% | 0.174  | IPR000668 (PRINTS); IPR000668 (SMART); G3DSA:3.90.70.10 (GENE3D); IPR000668 (PFAM); IPR012599 (PFAM); IPR015643 (PTHR12411:PANTHER); IPR013128 (PANTHER); IPR025660 (PROSITE_PATTERNS); IPR000169 (PROSITE_PATTERNS); IPR025661 (PROSITE_PATTERNS); CYTOPLASMIC_DOMAIN (PHOBIUS); TRANSMEMBRANE (PHOBIUS); TRANSMEMBRANE (PHOBIUS); CYTOPLASMIC_DOMAIN (PHOBIUS); NON_CYTOPLASMIC_DOMAIN (PHOBIUS); TRANSMEMBRANE (PHOBIUS); NON_CYTOPLASMIC_DOMAIN (PHOBIUS); TRANSMEMBRANE (PHOBIUS); CYTOPLASMIC_DOMAIN (PHOBIUS); NON_CYTOPLASMIC_DOMAIN (PHOBIUS); TRANSMEMBRANE (PHOBIUS); SSF54001 (SUPERFAMILY); TMhelix (TMHMM); TMhelix (TMHMM) |
| 497 | c14719_g1_i2_len_1770_path_1_0_1644_164<br>6_1645_1769_4 | 3689 | cathepsin b                                                  | 590  | 6.07E-164 | 78.60% | 0.117  | IPR000668 (PRINTS); IPR000668 (SMART); G3DSA:3.90.70.10 (GENE3D); IPR012599 (PFAM); IPR000668 (PFAM); IPR013128 (PANTHER); IPR015643 (PTHR12411:PANTHER); IPR000169 (PROSITE_PATTERNS); IPR025660 (PROSITE_PATTERNS); IPR025661 (PROSITE_PATTERNS); TRANSMEMBRANE (PHOBIUS); TRANSMEMBRANE (PHOBIUS); NON_CYTOPLASMIC_DOMAIN (PHOBIUS); CYTOPLASMIC_DOMAIN (PHOBIUS); CYTOPLASMIC_DOMAIN (PHOBIUS); SSF54001 (SUPERFAMILY); TMhelix (TMHMM)                                                                                                                                                                                               |
| 498 | c147217_g1_i1_len_401_path_379_0_400_2                   | 12   | wd repeat and fyve domain-containing protein 2               | 133  | 1.90E-69  | 82.60% | 0.143  | IPR001680 (SMART); IPR015943 (G3DSA:2.130.10.GENE3D); IPR001680 (PFAM); PTHR13856:SF7 (PANTHER); PTHR13856 (PANTHER); IPR019775 (PROSITE_PATTERNS); IPR019775 (PROSITE_PATTERNS); IPR001680 (PROSITE_PROFILES); IPR017986 (PROSITE_PROFILES); IPR001680 (PROSITE_PROFILES); IPR017986 (SUPERFAMILY)                                                                                                                                                                                                                                                                                                                                       |
| 499 | c14722_g1_i1_len_3082_path_3733_0_2522_25_2523_3081_4    | 447  | exocyst complex component 6b-like isoform 2                  | 1027 | 0         | 80.70% | 0.141  | Coil (COILS); Coil (COILS); Coil (COILS); IPR007225 (PFAM); IPR007225 (PANTHER); CYTOPLASMIC_DOMAIN (PHOBIUS); TRANSMEMBRANE (PHOBIUS); CYTOPLASMIC_DOMAIN (PHOBIUS); TRANSMEMBRANE (PHOBIUS); NON_CYTOPLASMIC_DOMAIN (PHOBIUS); TRANSMEMBRANE (PHOBIUS); NON_CYTOPLASMIC_DOMAIN (PHOBIUS); TMhelix (TMHMM); TMhelix (TMHMM)                                                                                                                                                                                                                                                                                                              |
| 500 | c147253_g1_i1_len_667_path_645_0_666_5                   | 24   | protein disulfide isomerase family member 4                  | 222  | 2.59E-69  | 63.40% | 0.126  | IPR012336 (G3DSA:3.40.30.GENE3D); IPR013766 (PFAM); PF13848 (PFAM); IPR012336 (G3DSA:3.40.30.GENE3D); PTHR18929:SF56 (PANTHER); PTHR18929 (PANTHER); IPR012336 (PROSITE_PROFILES); IPR012336 (SUPERFAMILY); IPR012336 (SUPERFAMILY)                                                                                                                                                                                                                                                                                                                                                                                                       |
| 501 | c147263_g1_i1_len_285_path_1_0_284_2                     | 4    | uncharacterized aarf domain-containing protein kinase 1-like | 95   | 3.18E-35  | 77.50% | 0.162  | PTHR10566:SF63 (PANTHER); PTHR10566 (PANTHER)                                                                                                                                                                                                                                                                                                                                                                                                                                                                                                                                                                                             |
| 502 | c14731_g1_i1_len_875_path_1_0_874_5                      | 57   | oocyte zinc finger protein partial                           | 291  | 1.55E-08  | 59.50% | 0.1    | IPR007087 (PROSITE_PATTERNS); IPR007087 (PROSITE_PROFILES); SSF57667 (SUPERFAMILY)                                                                                                                                                                                                                                                                                                                                                                                                                                                                                                                                                        |
| 503 | c14739_g1_i1_len_365_path_343_0_364_5                    | 15   | vesicle-fusing atpase 1-like                                 | 121  | 3.51E-40  | 76.90% | 0.12   | IPR003338 (SMART); G3DSA:2.40.40.20 (GENE3D); IPR003338 (PFAM); PTHR23078 (PANTHER); SignalP-TM (SIGNALP_GRAM_POSITIVE); IPR009010 (SUPERFAMILY)                                                                                                                                                                                                                                                                                                                                                                                                                                                                                          |
| 504 | c147416_g1_i1_len_573_path_551_0_572_4                   | 12   | group 3 secretory phospholipase a2-like                      | 191  | 8.09E-43  | 71.30% | 0.277  | IPR016090 (G3DSA:1.20.90.GENE3D); IPR001211 (PFAM); PTHR12253 (PANTHER); PTHR12253:SF8 (PANTHER); IPR013090 (PROSITE_PATTERNS); IPR016090 (SUPERFAMILY)                                                                                                                                                                                                                                                                                                                                                                                                                                                                                   |
| 505 | c147494_g1_i1_len_955_path_933_0_954_2                   | 46   | dehydrogenase reductase sdr family protein 7-like            | 318  | 2.87E-85  | 83.20% | 0.104  | IPR002347 (PRINTS); IPR016040 (G3DSA:3.40.50.GENE3D); IPR002198 (PFAM); PTHR24322 (PANTHER); PTHR24322:SF325 (PANTHER); IPR020904 (PROSITE_PATTERNS); CYTOPLASMIC_DOMAIN (PHOBIUS); NON_CYTOPLASMIC_DOMAIN (PHOBIUS); TRANSMEMBRANE (PHOBIUS); SSF51735 (SUPERFAMILY)                                                                                                                                                                                                                                                                                                                                                                     |
| 506 | c147558_g1_i1_len_834_path_1_0_833_3                     | 15   | serine threonine-protein kinase dclk2-like isoform x3        | 278  | 4.08E-42  | 75.80% | 0.304  | G3DSA:1.10.510.10 (GENE3D); IPR000719 (PFAM); PTHR24347:SF49 (PANTHER); IPR020636 (PANTHER); TRANSMEMBRANE (PHOBIUS); CYTOPLASMIC_DOMAIN (PHOBIUS); NON_CYTOPLASMIC_DOMAIN (PHOBIUS); IPR000719 (PROSITE_PROFILES); IPR011009 (SUPERFAMILY); TMhelix (TMHMM)                                                                                                                                                                                                                                                                                                                                                                              |
| 507 | c147561_g1_i1_len_249_path_227_0_248_0                   | 3    | matrix metalloproteinase                                     | 83   | 1.58E-17  | 67.90% | 0.491Y | IPR021190 (PRINTS); IPR024079 (G3DSA:3.40.390.GENE3D); IPR001818 (PFAM); PTHR10201 (PANTHER); SignalP-noTM (SIGNALP_EUK); SSF55486 (SUPERFAMILY)                                                                                                                                                                                                                                                                                                                                                                                                                                                                                          |
| 508 | c147606_g1_i1_len_1008_path_1_0_1007_4                   | 21   | low affinity immunoglobulin epsilon fc receptor-like         | 336  | 1.05E-18  | 48.80% | 0.11   | IPR001304 (SMART); IPR001304 (PFAM); IPR016186 (G3DSA:3.10.100.GENE3D); PTHR22802 (PANTHER); IPR018378 (PROSITE_PATTERNS); IPR001304 (PROSITE_PROFILES); IPR016187 (SUPERFAMILY)                                                                                                                                                                                                                                                                                                                                                                                                                                                          |
| 509 | c147773_g1_i1_len_242_path_220_0_241_1                   | 6    | esterase e4-like                                             | 81   | 9.76E-29  | 77.20% | 0.201  | IPR002018 (PFAM); IPR029058 (G3DSA:3.40.50.GENE3D); PTHR11559 (PANTHER); IPR029058 (SUPERFAMILY)                                                                                                                                                                                                                                                                                                                                                                                                                                                                                                                                          |

|     |                                                              |     |                                                                    |     |          |        |        |                                                                                                                                                                                                                                                                                                                                                                                                                                                                 |
|-----|--------------------------------------------------------------|-----|--------------------------------------------------------------------|-----|----------|--------|--------|-----------------------------------------------------------------------------------------------------------------------------------------------------------------------------------------------------------------------------------------------------------------------------------------------------------------------------------------------------------------------------------------------------------------------------------------------------------------|
| 510 | c14789_g1_i1_len_818_path_1_0_817_1                          | 96  | glutathione peroxidase 7                                           | 273 | 7.88E-76 | 70.60% | 0.531Y | IPR000889 (PRINTS); IPR012336 (G3DSA:3.40.30.GENE3D); IPR000889 (PFAM); IPR000889 (PANTHER); PTHR11592:SF10 (PANTHER); IPR029759 (PROSITE_PATTERNS); IPR029760 (PROSITE_PATTERNS); TRANSMEMBRANE (PHOBIUS); NON_CYTOPLASMIC_DOMAIN (PHOBIUS); CYTOPLASMIC_DOMAIN (PHOBIUS); IPR000889 (PROSITE_PROFILES); SignalP-noTM (SIGNALP_EUK); IPR012336 (SUPERFAMILY); TMhelix (TMHMM)                                                                                  |
| 511 | c147928_g1_i1_len_693_path_671_0_692_2                       | 14  | integrin alpha-ps1 isoform x2                                      | 231 | 1.04E-96 | 74.30% | 0.111  | IPR000413 (PRINTS); IPR013519 (SMART); G3DSA:2.130.10.130 (GENE3D); PF13517 (PFAM); IPR013517 (PFAM); G3DSA:2.60.40.1460 (GENE3D); PTHR23220 (PANTHER); PTHR23220:SF77 (PANTHER); IPR013519 (PROSITE_PROFILES); IPR013519 (PROSITE_PROFILES); IPR013519 (PROSITE_PROFILES); SSF69318 (SUPERFAMILY)                                                                                                                                                              |
| 512 | c147969_g1_i1_len_276_path_254_0_275_3                       | 12  | titin isoform x1                                                   | 92  | 2.37E-33 | 77.80% | 0.111  | IPR003599 (SMART); IPR013098 (PFAM); IPR013783 (G3DSA:2.60.40.GENE3D); PTHR19897 (PANTHER); PTHR19897:SF149 (PANTHER); IPR007110 (PROSITE_PROFILES); SSF48726 (SUPERFAMILY)                                                                                                                                                                                                                                                                                     |
| 513 | c148104_g1_i1_len_353_path_1_0_352_0                         | 5   | low-density lipoprotein receptor-related protein 4                 | 118 | 1.98E-15 | 57.90% | 0.106  | IPR002172 (PRINTS); IPR002172 (SMART); IPR002172 (G3DSA:4.10.400.GENE3D); IPR002172 (PFAM); PTHR10529 (PANTHER); IPR023415 (PROSITE_PATTERNS); IPR023415 (PROSITE_PATTERNS); IPR002172 (PROSITE_PROFILES); IPR002172 (PROSITE_PROFILES); IPR002172 (SUPERFAMILY); IPR002172 (SUPERFAMILY)                                                                                                                                                                       |
| 514 | c148132_g1_i1_len_507_path_1_0_278_280_279_392_280_393_506_2 | 13  | sortilin-related receptor-like                                     | 169 | 6.74E-10 | 47.40% | 0.099  | IPR002172 (SMART); IPR002172 (G3DSA:4.10.400.GENE3D); IPR002172 (PFAM); G3DSA:4.10.1220.10 (GENE3D); PTHR10529 (PANTHER); IPR023415 (PROSITE_PATTERNS); IPR002172 (PROSITE_PROFILES); IPR002172 (SUPERFAMILY)                                                                                                                                                                                                                                                   |
| 515 | c148179_g1_i1_len_247_path_1_0_246_1                         | 4   | c-type lectin domain family 4 member d                             | 82  | 3.70E-09 | 55.90% | 0.112  | IPR016186 (G3DSA:3.10.100.GENE3D); IPR001304 (PFAM); IPR001304 (PROSITE_PROFILES); IPR016187 (SUPERFAMILY)                                                                                                                                                                                                                                                                                                                                                      |
| 516 | c148194_g1_i1_len_310_path_288_0_309_4                       | 6   | hormone-sensitive lipase                                           | 103 | 1.08E-42 | 76.10% | 0.182  | IPR013094 (PFAM); IPR029058 (G3DSA:3.40.50.GENE3D); PTHR23025 (PANTHER); PTHR23025:SF3 (PANTHER); IPR029058 (SUPERFAMILY)                                                                                                                                                                                                                                                                                                                                       |
| 521 | c1482_g1_i1_len_375_path_125_0_374_4                         | 8   | down syndrome cell adhesion molecule isoform x101                  | 125 | 1.38E-65 | 93.00% | 0.121  | PR00014 (PRINTS); IPR003961 (SMART); IPR003961 (PFAM); IPR013783 (G3DSA:2.60.40.GENE3D); IPR013783 (G3DSA:2.60.40.GENE3D); PTHR10489 (PANTHER); PTHR10489:SF567 (PANTHER); IPR003961 (PROSITE_PROFILES); IPR003961 (SUPERFAMILY); SSF48726 (SUPERFAMILY)                                                                                                                                                                                                        |
| 517 | c148222_g1_i1_len_1616_path_1_0_1615_2                       | 150 | thioredoxin-related transmembrane protein 1-like                   | 538 | 1.08E-97 | 71.30% | 0.684Y | IPR012336 (G3DSA:3.40.30.GENE3D); IPR013766 (PFAM); PTHR18929 (PANTHER); PTHR18929:SF81 (PANTHER); IPR017937 (PROSITE_PATTERNS); SIGNAL_PEPTIDE_H_REGION (PHOBIUS); NON_CYTOPLASMIC_DOMAIN (PHOBIUS); SIGNAL_PEPTIDE_N_REGION (PHOBIUS); SIGNAL_PEPTIDE (PHOBIUS); TRANSMEMBRANE (PHOBIUS); SIGNAL_PEPTIDE_C_REGION (PHOBIUS); CYTOPLASMIC_DOMAIN (PHOBIUS); IPR012336 (PROSITE_PROFILES); SignalP-noTM (SIGNALP_EUK); IPR012336 (SUPERFAMILY); TMhelix (TMHMM) |
| 518 | c148260_g1_i1_len_594_path_1_0_296_1_297_593_0               | 15  | titin-like isoform x26                                             | 198 | 9.38E-12 | 45.40% | 0.107  | IPR003961 (SMART); IPR013783 (G3DSA:2.60.40.GENE3D); IPR003961 (PFAM); IPR013783 (G3DSA:2.60.40.GENE3D); PTHR10489 (PANTHER); IPR003961 (PROSITE_PROFILES); IPR003961 (PROSITE_PROFILES); IPR003961 (SUPERFAMILY)                                                                                                                                                                                                                                               |
| 519 | c148265_g1_i1_len_639_path_1_0_638_2                         | 42  | aldehyde dehydrogenase family 9 member a1-a-like                   | 213 | 1.95E-54 | 81.40% | 0.112  | IPR016163 (G3DSA:3.40.309.GENE3D); IPR015590 (PFAM); PTHR11699:SF114 (PANTHER); PTHR11699 (PANTHER); IPR016161 (SUPERFAMILY)                                                                                                                                                                                                                                                                                                                                    |
| 520 | c148274_g1_i1_len_705_path_1_0_704_0                         | 14  | acyl- delta desaturase                                             | 235 | 5.33E-83 | 73.70% | 0.1    | IPR015876 (PRINTS); IPR005804 (PFAM); PTHR11351 (PANTHER); PTHR11351:SF28 (PANTHER); CYTOPLASMIC_DOMAIN (PHOBIUS); NON_CYTOPLASMIC_DOMAIN (PHOBIUS); TRANSMEMBRANE (PHOBIUS); CYTOPLASMIC_DOMAIN (PHOBIUS); TRANSMEMBRANE (PHOBIUS); NON_CYTOPLASMIC_DOMAIN (PHOBIUS); TRANSMEMBRANE (PHOBIUS); TMhelix (TMHMM); TMhelix (TMHMM); TMhelix (TMHMM)                                                                                                               |
| 522 | c148374_g1_i1_len_363_path_341_0_362_4                       | 6   | glucosylceramidase- partial                                        | 121 | 3.60E-37 | 68.20% | 0.144  | IPR013780 (G3DSA:2.60.40.GENE3D); IPR013781 (G3DSA:3.20.20.GENE3D); IPR001139 (PFAM); PTHR11069:SF7 (PANTHER); IPR001139 (PANTHER); IPR017853 (SUPERFAMILY)                                                                                                                                                                                                                                                                                                     |
| 523 | c148388_g1_i1_len_1220_path_1198_0_1219_3                    | 51  | peptidylprolyl isomerase domain and wd repeat-containing protein 1 | 407 | 0        | 88.40% | 0.105  | IPR002130 (PRINTS); IPR015943 (G3DSA:2.130.10.GENE3D); IPR029000 (G3DSA:2.40.100.GENE3D); IPR002130 (PFAM); IPR024936 (PANTHER); PTHR11071:SF228 (PANTHER); IPR002130 (PROSITE_PROFILES); SSF69322 (SUPERFAMILY); IPR029000 (SUPERFAMILY)                                                                                                                                                                                                                       |

|     |                                        |    |                                                                                                                                 |     |           |        |       |                                                                                                                                                                                                                                                                                                                                                                                                                                        |
|-----|----------------------------------------|----|---------------------------------------------------------------------------------------------------------------------------------|-----|-----------|--------|-------|----------------------------------------------------------------------------------------------------------------------------------------------------------------------------------------------------------------------------------------------------------------------------------------------------------------------------------------------------------------------------------------------------------------------------------------|
| 524 | c148496_g1_i1_len_738_path_716_0_737_1 | 34 | contactin associated protein 1                                                                                                  | 246 | 6.40E-31  | 50.30% | 0.104 | IPR001073 (PRINTS); IPR001073 (SMART); IPR008983 (G3DSA:2.60.120.GENE3D); IPR014716 (G3DSA:3.90.215.GENE3D); IPR001073 (PFAM); PTHR10127 (PANTHER); PTHR10127:SF575 (PANTHER); IPR001073 (PROSITE_PROFILES); IPR008983 (SUPERFAMILY); IPR002181 (SUPERFAMILY)                                                                                                                                                                          |
| 525 | c148521_g1_i1_len_1110_path_1_0_1109_4 | 57 | iduronate 2-sulfatase-like                                                                                                      | 370 | 1.20E-88  | 59.70% | 0.115 | IPR017849 (G3DSA:3.40.720.GENE3D); G3DSA:3.30.1120.10 (GENE3D); IPR000917 (PFAM); PTHR10342 (PANTHER); PTHR10342:SF185 (PANTHER); TRANSMEMBRANE (PHOBIUS); TRANSMEMBRANE (PHOBIUS); NON_CYTOPLASMIC_DOMAIN (PHOBIUS); NON_CYTOPLASMIC_DOMAIN (PHOBIUS); CYTOPLASMIC_DOMAIN (PHOBIUS); IPR017850 (SUPERFAMILY) G3DSA:1.20.190.20 (GENE3D); IPR023410 (PFAM); IPR000308 (PANTHER); IPR023409 (PROSITE_PATTERNS); IPR023410 (SUPERFAMILY) |
| 526 | c148556_g1_i1_len_260_path_1_0_259_2   | 8  | dna damage checkpoint protein                                                                                                   | 86  | 1.12E-15  | 93.50% | 0.109 | IPR001623 (PRINTS); IPR001623 (SMART); G3DSA:3.90.10.10 (GENE3D); PF14901 (PFAM); IPR001623 (G3DSA:1.10.287.GENE3D); IPR001623 (PFAM); PTHR24078 (PANTHER); PTHR24078:SF141 (PANTHER); IPR001623 (PROSITE_PROFILES); IPR001623 (SUPERFAMILY)                                                                                                                                                                                           |
| 527 | c14856_g1_i1_len_645_path_463_0_644_0  | 28 | dnaj homolog dnj-5                                                                                                              | 215 | 2.99E-95  | 84.00% | 0.11  | IPR002130 (PRINTS); IPR029000 (G3DSA:2.40.100.GENE3D); IPR002130 (PFAM); IPR024936 (PANTHER); IPR020892 (PROSITE_PATTERNS); IPR002130 (PROSITE_PROFILES); IPR029000 (SUPERFAMILY)                                                                                                                                                                                                                                                      |
| 528 | c148607_g1_i1_len_738_path_716_0_737_0 | 59 | peptidyl-prolyl cis-trans isomerase-like 1                                                                                      | 234 | 1.90E-86  | 92.30% | 0.115 | IPR002110 (SMART); IPR002110 (PFAM); IPR020683 (PFAM); IPR020683 (G3DSA:1.25.40.GENE3D); IPR020683 (G3DSA:1.25.40.GENE3D); PTHR24166 (PANTHER); PTHR24166:SF8 (PANTHER); IPR002110 (PROSITE_PROFILES); IPR002110 (PROSITE_PROFILES); IPR002110 (PROSITE_PROFILES); IPR002110 (PROSITE_PROFILES); IPR020683 (SUPERFAMILY)                                                                                                               |
| 529 | c148690_g1_i1_len_963_path_1_0_962_5   | 86 | protein tanc2 isoform x2                                                                                                        | 321 | 1.52E-121 | 78.40% | 0.133 | IPR002110 (PRINTS); IPR002110 (SMART); IPR020683 (PFAM); IPR002110 (PFAM); IPR020683 (G3DSA:1.25.40.GENE3D); IPR020683 (G3DSA:1.25.40.GENE3D); PTHR24198 (PANTHER); IPR020683 (PROSITE_PROFILES); IPR002110 (PROSITE_PROFILES); IPR002110 (PROSITE_PROFILES); IPR002110 (PROSITE_PROFILES); IPR020683 (SUPERFAMILY)                                                                                                                    |
| 530 | c148730_g1_i1_len_310_path_1_0_309_0   | 10 | ankyrin repeat                                                                                                                  | 104 | 2.21E-22  | 60.30% | 0.113 | IPR002110 (PRINTS); IPR002110 (SMART); IPR020683 (PFAM); IPR002110 (PFAM); IPR020683 (G3DSA:1.25.40.GENE3D); IPR020683 (G3DSA:1.25.40.GENE3D); PTHR24198 (PANTHER); IPR020683 (PROSITE_PROFILES); IPR002110 (PROSITE_PROFILES); IPR002110 (PROSITE_PROFILES); IPR002110 (PROSITE_PROFILES); IPR020683 (SUPERFAMILY)                                                                                                                    |
| 531 | c148787_g1_i1_len_381_path_359_0_380_2 | 6  | d chain coupling of remote alternating-access transport mechanisms for protons and substrates in the multidrug efflux pump acrb | 127 | 6.01E-18  | 68.60% | 0.104 | IPR002110 (PRINTS); IPR002110 (SMART); IPR020683 (PFAM); IPR020683 (G3DSA:1.25.40.GENE3D); PTHR24182 (PANTHER); IPR020683 (PROSITE_PROFILES); IPR002110 (PROSITE_PROFILES); IPR002110 (PROSITE_PROFILES); IPR020683 (SUPERFAMILY)                                                                                                                                                                                                      |
| 532 | c148867_g1_i1_len_323_path_1_0_322_3   | 4  | peptidylprolyl isomerase                                                                                                        | 108 | 2.22E-39  | 68.70% | 0.11  | IPR001179 (PFAM); G3DSA:3.10.50.40 (GENE3D); IPR023566 (PANTHER); IPR001179 (PROSITE_PROFILES); SSF54534 (SUPERFAMILY)                                                                                                                                                                                                                                                                                                                 |
| 533 | c148874_g1_i1_len_1820_path_1_0_1819_3 | 38 | protein jagged-1-like                                                                                                           | 607 | 4.13E-14  | 38.10% | 0.107 | no IPS match                                                                                                                                                                                                                                                                                                                                                                                                                           |
| 534 | c148924_g1_i1_len_318_path_296_0_317_1 | 12 | proclotting enzyme                                                                                                              | 106 | 2.55E-19  | 59.50% | 0.133 | G3DSA:2.40.10.10 (GENE3D); IPR001254 (PFAM); G3DSA:2.40.10.10 (GENE3D); PTHR24260:SF3 (PANTHER); PTHR24260 (PANTHER); IPR018114 (PROSITE_PATTERNS); IPR001254 (PROSITE_PROFILES); IPR009003 (SUPERFAMILY)                                                                                                                                                                                                                              |
| 535 | c148990_g1_i1_len_423_path_401_0_422_0 | 6  | protogenin a-like                                                                                                               | 141 | 6.19E-26  | 65.00% | 0.111 | IPR013098 (PFAM); IPR013783 (G3DSA:2.60.40.GENE3D); IPR013783 (G3DSA:2.60.40.GENE3D); PTHR10489 (PANTHER); PTHR10489:SF20 (PANTHER); IPR007110 (PROSITE_PROFILES); IPR007110 (PROSITE_PROFILES); SSF48726 (SUPERFAMILY); SSF48726 (SUPERFAMILY)                                                                                                                                                                                        |
| 536 | c149035_g1_i1_len_396_path_374_0_395_1 | 22 | ankyrin repeat domain-containing protein 16-like                                                                                | 132 | 7.57E-30  | 63.50% | 0.241 | IPR002110 (SMART); IPR002110 (PFAM); IPR020683 (PFAM); IPR020683 (G3DSA:1.25.40.GENE3D); PTHR24181:SF20 (PANTHER); PTHR24181 (PANTHER); IPR020683 (PROSITE_PROFILES); IPR002110 (PROSITE_PROFILES); IPR002110 (PROSITE_PROFILES); IPR020683 (SUPERFAMILY)                                                                                                                                                                              |
| 537 | c149055_g1_i1_len_728_path_706_0_727_5 | 11 | endothelin-converting enzyme 1 isoform x2                                                                                       | 242 | 1.73E-41  | 73.60% | 0.146 | IPR000718 (PANTHER); IPR029734 (PTHR11733:PANTHER); CYTOPLASMIC_DOMAIN (PHOBIUS); NON_CYTOPLASMIC_DOMAIN (PHOBIUS); TRANSMEMBRANE (PHOBIUS); TRANSMEMBRANE (PHOBIUS); NON_CYTOPLASMIC_DOMAIN (PHOBIUS); SSF55486 (SUPERFAMILY); TMhelix (TMHMM); TMhelix (TMHMM)                                                                                                                                                                       |

|     |                                                      |    |                                                                                  |     |           |        |        |                                                                                                                                                                                                                                                                                                                                                                                                                                                                                                                                                                                                                                                                                                                                                                                    |
|-----|------------------------------------------------------|----|----------------------------------------------------------------------------------|-----|-----------|--------|--------|------------------------------------------------------------------------------------------------------------------------------------------------------------------------------------------------------------------------------------------------------------------------------------------------------------------------------------------------------------------------------------------------------------------------------------------------------------------------------------------------------------------------------------------------------------------------------------------------------------------------------------------------------------------------------------------------------------------------------------------------------------------------------------|
| 538 | c149086_g1_i1_len_382_path_360_0_381_4               | 4  | zinc finger protein 214 isoform x3                                               | 127 | 1.09E-31  | 68.00% | 0.108  | IPR015880 (SMART); IPR013087 (G3DSA:3.30.160.GENE3D); IPR013087 (G3DSA:3.30.160.GENE3D); PF13465 (PFAM); IPR013087 (G3DSA:3.30.160.GENE3D); PTHR24409 (PANTHER); IPR007087 (PROSITE_PATTERNS); IPR007087 (PROSITE_PATTERNS); IPR007087 (PROSITE_PATTERNS); IPR007087 (PROSITE_PATTERNS); IPR007087 (PROSITE_PROFILES); IPR007087 (PROSITE_PROFILES); IPR007087 (PROSITE_PROFILES); IPR007087 (PROSITE_PROFILES); IPR007087 (PROSITE_PROFILES); SSF57667 (SUPERFAMILY); SSF57667 (SUPERFAMILY)                                                                                                                                                                                                                                                                                      |
| 539 | c149118_g1_i1_len_1347_path_1_0_1346_5               | 71 | low quality protein: hemocytin                                                   | 449 | 4.38E-37  | 48.40% | 0.1    | IPR025155 (PFAM); IPR008979 (G3DSA:2.60.120.GENE3D); IPR000421 (PFAM); PTHR24543 (PANTHER); IPR000421 (PROSITE_PROFILES); IPR008979 (SUPERFAMILY)                                                                                                                                                                                                                                                                                                                                                                                                                                                                                                                                                                                                                                  |
| 540 | c149154_g1_i1_len_944_path_945_0_747_16_93_748_943_2 | 52 | zinc finger protein 275                                                          | 314 | 1.03E-20  | 57.50% | 0.112  | IPR015880 (SMART); IPR007087 (PFAM); PF13894 (PFAM); IPR013087 (G3DSA:3.30.160.GENE3D); IPR013087 (G3DSA:3.30.160.GENE3D); PF13913 (PFAM); PTHR24409 (PANTHER); IPR007087 (PROSITE_PATTERNS); IPR007087 (PROSITE_PATTERNS); IPR007087 (PROSITE_PATTERNS); IPR007087 (PROSITE_PATTERNS); IPR007087 (PROSITE_PROFILES); IPR007087 (PROSITE_PROFILES); IPR007087 (PROSITE_PROFILES); IPR007087 (PROSITE_PROFILES); SSF57667 (SUPERFAMILY); SSF57667 (SUPERFAMILY)                                                                                                                                                                                                                                                                                                                     |
| 541 | c149176_g1_i1_len_1191_path_1169_0_1190_5            | 35 | amyloid beta a4 protein                                                          | 397 | 8.92E-145 | 70.00% | 0.1    | IPR008197 (PRINTS); IPR002223 (PRINTS); IPR002223 (SMART); IPR006150 (SMART); IPR008197 (SMART); IPR000716 (SMART); IPR000716 (G3DSA:4.10.800.GENE3D); IPR004094 (PFAM); IPR000716 (PFAM); IPR028150 (PFAM); IPR008197 (G3DSA:4.10.75.GENE3D); IPR002223 (G3DSA:4.10.410.GENE3D); IPR002223 (PFAM); IPR004094 (G3DSA:2.10.22.GENE3D); IPR008197 (PFAM); PTHR19441:SF10 (PANTHER); PTHR19441 (PANTHER); IPR000716 (PROSITE_PATTERNS); IPR000716 (PROSITE_PATTERNS); IPR020901 (PROSITE_PATTERNS); IPR000716 (PROSITE_PROFILES); IPR000716 (PROSITE_PROFILES); IPR004094 (PROSITE_PROFILES); IPR008197 (PROSITE_PROFILES); IPR002223 (PROSITE_PROFILES); IPR011061 (SUPERFAMILY); IPR000716 (SUPERFAMILY); IPR000716 (SUPERFAMILY); IPR008197 (SUPERFAMILY); IPR002223 (SUPERFAMILY) |
| 542 | c149210_g1_i1_len_455_path_433_0_454_4               | 8  | leucine-rich repeat and calponin homology domain-containing protein 1 isoform x2 | 152 | 1.67E-59  | 79.50% | 0.112  | IPR003591 (SMART); IPR001611 (PFAM); G3DSA:3.80.10.10 (GENE3D); IPR001611 (PFAM); PTHR23155 (PANTHER); PTHR23155:SF423 (PANTHER); IPR001611 (PROSITE_PROFILES); IPR001611 (PROSITE_PROFILES); IPR001611 (PROSITE_PROFILES); IPR001611 (PROSITE_PROFILES); SSF52058 (SUPERFAMILY)                                                                                                                                                                                                                                                                                                                                                                                                                                                                                                   |
| 543 | c149380_g1_i1_len_647_path_625_0_646_5               | 22 | leukocyte-antigen-related- isoform b                                             | 215 | 3.56E-83  | 78.30% | 0.188  | PR00014 (PRINTS); IPR003961 (SMART); IPR003961 (PFAM); IPR013783 (G3DSA:2.60.40.GENE3D); PTHR19134:SF199 (PANTHER); PTHR19134 (PANTHER); IPR003961 (PROSITE_PROFILES); IPR003961 (PROSITE_PROFILES); IPR003961 (SUPERFAMILY); IPR003961 (SUPERFAMILY)                                                                                                                                                                                                                                                                                                                                                                                                                                                                                                                              |
| 544 | c14940_g2_i1_len_509_path_527_0_508_1                | 15 | alpha-mannosidase 2x                                                             | 170 | 3.86E-53  | 74.40% | 0.103  | IPR027291 (G3DSA:3.20.110.GENE3D); IPR000602 (PFAM); PTHR11607:SF4 (PANTHER); PTHR11607 (PANTHER); IPR011330 (SUPERFAMILY)                                                                                                                                                                                                                                                                                                                                                                                                                                                                                                                                                                                                                                                         |
| 545 | c149430_g1_i1_len_1191_path_1169_0_1190_1            | 78 | low quality protein: thioredoxin domain-containing protein 11-like               | 397 | 1.84E-69  | 54.50% | 0.105  | IPR012336 (G3DSA:3.40.30.GENE3D); IPR013766 (PFAM); PTHR18929:SF61 (PANTHER); PTHR18929 (PANTHER); IPR012336 (PROSITE_PROFILES); IPR012336 (SUPERFAMILY); TMhelix (TMHMM)                                                                                                                                                                                                                                                                                                                                                                                                                                                                                                                                                                                                          |
| 546 | c149551_g1_i1_len_749_path_727_0_748_5               | 12 | receptor-type tyrosine-protein phosphatase f-like isoform x2                     | 249 | 8.45E-19  | 54.70% | 0.12   | IPR000242 (PFAM); G3DSA:2.170.300.10 (GENE3D); IPR029021 (G3DSA:3.90.190.GENE3D); PTHR19134 (PANTHER); IPR013032 (PROSITE_PATTERNS); TRANSMEMBRANE (PHOBIUS); NON_CYTOPLASMIC_DOMAIN (PHOBIUS); CYTOPLASMIC_DOMAIN (PHOBIUS); IPR000242 (PROSITE_PROFILES); IPR009030 (SUPERFAMILY); IPR029021 (SUPERFAMILY); TMhelix (TMHMM)                                                                                                                                                                                                                                                                                                                                                                                                                                                      |
| 547 | c149674_g1_i1_len_356_path_1_0_355_3                 | 7  | low quality protein: myosin heavy muscle                                         | 119 | 1.71E-64  | 92.70% | 0.103  | Coil (COILS); Coil (COILS); IPR002928 (PFAM); PTHR13140 (PANTHER); PTHR13140:SF332 (PANTHER); SSF90257 (SUPERFAMILY)                                                                                                                                                                                                                                                                                                                                                                                                                                                                                                                                                                                                                                                               |
| 548 | c149677_g1_i1_len_373_path_1_0_372_1                 | 4  | reelin- partial                                                                  | 124 | 6.55E-26  | 59.70% | 0.105  | PTHR11841 (PANTHER)                                                                                                                                                                                                                                                                                                                                                                                                                                                                                                                                                                                                                                                                                                                                                                |
| 549 | c149808_g1_i1_len_1530_path_1508_0_1529_0            | 60 | ga-binding protein subunit beta-2                                                | 510 | 8.15E-99  | 56.70% | 0.538Y | Coil (COILS); IPR002110 (PRINTS); IPR002110 (SMART); IPR020683 (PFAM); IPR020683 (G3DSA:1.25.40.GENE3D); IPR020683 (G3DSA:1.25.40.GENE3D); PTHR24193:SF73 (PANTHER); PTHR24193 (PANTHER); IPR002110 (PROSITE_PROFILES); IPR002110 (PROSITE_PROFILES); IPR002110 (PROSITE_PROFILES); IPR020683 (PROSITE_PROFILES); SignalP-noTM (SIGNALP_EUK); IPR020683 (SUPERFAMILY)                                                                                                                                                                                                                                                                                                                                                                                                              |

|     |                                                          |    |                                                                                     |     |           |        |        |                                                                                                                                                                                                                                                                                                                                                                                                                                                                                                                                                                                                                                                                                                |
|-----|----------------------------------------------------------|----|-------------------------------------------------------------------------------------|-----|-----------|--------|--------|------------------------------------------------------------------------------------------------------------------------------------------------------------------------------------------------------------------------------------------------------------------------------------------------------------------------------------------------------------------------------------------------------------------------------------------------------------------------------------------------------------------------------------------------------------------------------------------------------------------------------------------------------------------------------------------------|
| 550 | c14985_g1_i1_len_1031_path_1009_0_629_1_639_630_1030_5   | 49 | n-alpha-acetyltransferase auxiliary subunit                                         | 343 | 6.94E-123 | 68.10% | 0.112  | IPR011990 (G3DSA:1.25.40.GENE3D); IPR011990 (G3DSA:1.25.40.GENE3D); PTHR22767:SF3 (PANTHER); PTHR22767 (PANTHER); IPR013026 (PROSITE_PROFILES); SSF48452 (SUPERFAMILY)                                                                                                                                                                                                                                                                                                                                                                                                                                                                                                                         |
| 551 | c149861_g1_i1_len_373_path_1_0_372_4                     | 39 | alpha-carbonic anhydrase                                                            | 124 | 5.21E-35  | 65.20% | 0.143  | IPR001148 (SMART); IPR001148 (PFAM); IPR001148 (G3DSA:3.10.200.GENE3D); IPR023561 (PANTHER); PTHR18952:SF92 (PANTHER); IPR001148 (PROSITE_PROFILES); IPR001148 (SUPERFAMILY)                                                                                                                                                                                                                                                                                                                                                                                                                                                                                                                   |
| 552 | c149863_g1_i1_len_591_path_32_0_590_5                    | 30 | homeotic protein spalt-major-like isoform x2                                        | 197 | 1.32E-59  | 60.10% | 0.325  | IPR015880 (SMART); IPR013087 (G3DSA:3.30.160.GENE3D); IPR013087 (G3DSA:3.30.160.GENE3D); PF13465 (PFAM); IPR013087 (G3DSA:3.30.160.GENE3D); IPR007087 (PFAM); PTHR23233:SF51 (PANTHER); PTHR23233 (PANTHER); IPR007087 (PROSITE_PATTERNS); IPR007087 (PROSITE_PATTERNS); SIGNAL_PEPTIDE_C_REGION (PHOBIUS); SIGNAL_PEPTIDE (PHOBIUS); SIGNAL_PEPTIDE_N_REGION (PHOBIUS); SIGNAL_PEPTIDE_H_REGION (PHOBIUS); NON_CYTOPLASMIC_DOMAIN (PHOBIUS); IPR007087 (PROSITE_PROFILES); IPR007087 (PROSITE_PROFILES); IPR007087 (PROSITE_PROFILES); IPR007087 (PROSITE_PROFILES); SignalP-noTM (SIGNALP_GRAM_NEGATIVE); SignalP-TM (SIGNALP_GRAM_POSITIVE); SSF57667 (SUPERFAMILY); SSF57667 (SUPERFAMILY) |
| 553 | c149870_g1_i1_len_869_path_1_0_868_1                     | 17 | gastrula zinc finger                                                                | 290 | 4.23E-148 | 66.00% | 0.109  | IPR015880 (SMART); IPR013087 (G3DSA:3.30.160.GENE3D); IPR007087 (PFAM); IPR013087 (G3DSA:3.30.160.GENE3D); IPR013087 (G3DSA:3.30.160.GENE3D); PF13465 (PFAM); PTHR24409 (PANTHER); IPR007087 (PROSITE_PATTERNS); IPR007087 (PROSITE_PATTERNS); IPR007087 (PROSITE_PATTERNS); IPR007087 (PROSITE_PATTERNS); IPR007087 (PROSITE_PATTERNS); IPR007087 (PROSITE_PATTERNS); IPR007087 (PROSITE_PROFILES); IPR007087 (PROSITE_PROFILES); IPR007087 (PROSITE_PROFILES); IPR007087 (PROSITE_PROFILES); IPR007087 (PROSITE_PROFILES); IPR007087 (PROSITE_PROFILES); SSF57667 (SUPERFAMILY); SSF57667 (SUPERFAMILY); SSF57667 (SUPERFAMILY)                                                              |
| 554 | c149954_g1_i1_len_543_path_521_0_542_2                   | 22 | arylsulfatase b                                                                     | 181 | 6.30E-39  | 56.90% | 0.098  | IPR000917 (PFAM); IPR017849 (G3DSA:3.40.720.GENE3D); G3DSA:3.30.1120.10 (GENE3D); PTHR10342:SF196 (PANTHER); PTHR10342 (PANTHER); IPR017850 (SUPERFAMILY)                                                                                                                                                                                                                                                                                                                                                                                                                                                                                                                                      |
| 555 | c150145_g1_i1_len_471_path_1_0_470_1                     | 12 | probable flavin-containing monoamine oxidase a                                      | 157 | 5.16E-51  | 71.60% | 0.17   | G3DSA:1.10.405.10 (GENE3D); G3DSA:3.50.50.60 (GENE3D); PF13450 (PFAM); PTHR10742 (PANTHER); PTHR10742:SF217 (PANTHER); TRANSMEMBRANE (PHOBIUS); CYTOPLASMIC_DOMAIN (PHOBIUS); NON_CYTOPLASMIC_DOMAIN (PHOBIUS); SSF51905 (SUPERFAMILY); TMhelix (TMHMM)                                                                                                                                                                                                                                                                                                                                                                                                                                        |
| 556 | c15023_g1_i1_len_169_path_1_0_168_0                      | 2  | type-2 ice-structuring isoform x2                                                   | 57  | 4.19E-07  | 57.50% | 0.103  | IPR001304 (PFAM); IPR016186 (G3DSA:3.10.100.GENE3D); IPR001304 (PROSITE_PROFILES); IPR016187 (SUPERFAMILY)                                                                                                                                                                                                                                                                                                                                                                                                                                                                                                                                                                                     |
| 557 | c150262_g1_i1_len_308_path_1_0_307_3                     | 4  | upf0454 protein c12orf49 homolog                                                    | 103 | 6.09E-34  | 68.80% | 0.517Y | IPR019352 (PFAM); IPR019352 (PANTHER); SIGNAL_PEPTIDE_H_REGION (PHOBIUS); NON_CYTOPLASMIC_DOMAIN (PHOBIUS); SIGNAL_PEPTIDE (PHOBIUS); SIGNAL_PEPTIDE_N_REGION (PHOBIUS); SIGNAL_PEPTIDE_C_REGION (PHOBIUS); SignalP-noTM (SIGNALP_GRAM_NEGATIVE); SignalP-TM (SIGNALP_GRAM_POSITIVE); SignalP-TM (SIGNALP_EUK); TMhelix (TMHMM)                                                                                                                                                                                                                                                                                                                                                                |
| 558 | c150386_g1_i1_len_385_path_363_0_384_5                   | 6  | zinc finger protein 225                                                             | 128 | 3.27E-31  | 61.20% | 0.111  | IPR015880 (SMART); PF13465 (PFAM); PF13894 (PFAM); IPR013087 (G3DSA:3.30.160.GENE3D); PTHR24409 (PANTHER); IPR007087 (PROSITE_PATTERNS); IPR007087 (PROSITE_PATTERNS); IPR007087 (PROSITE_PROFILES); IPR007087 (PROSITE_PROFILES); IPR007087 (PROSITE_PROFILES); SSF57667 (SUPERFAMILY); SSF57667 (SUPERFAMILY)                                                                                                                                                                                                                                                                                                                                                                                |
| 559 | c150418_g1_i1_len_361_path_1_0_360_3                     | 7  | von willebrand factor type egf and pentraxin domain-containing protein 1 isoform x1 | 121 | 4.59E-40  | 72.00% | 0.116  | IPR000436 (SMART); G3DSA:2.10.70.10 (GENE3D); IPR000436 (PFAM); G3DSA:2.10.70.10 (GENE3D); PTHR19325 (PANTHER); PTHR19325:SF340 (PANTHER); IPR000436 (PROSITE_PROFILES); IPR000436 (PROSITE_PROFILES); IPR000436 (SUPERFAMILY); IPR000436 (SUPERFAMILY)                                                                                                                                                                                                                                                                                                                                                                                                                                        |
| 560 | c150530_g1_i1_len_462_path_1_0_461_1                     | 10 | lysosomal pro-x carboxypeptidase                                                    | 154 | 2.07E-69  | 78.00% | 0.101  | IPR029058 (G3DSA:3.40.50.GENE3D); IPR008758 (PFAM); IPR008758 (PANTHER); PTHR11010:SF11 (PANTHER); IPR029058 (SUPERFAMILY)                                                                                                                                                                                                                                                                                                                                                                                                                                                                                                                                                                     |
| 561 | c150632_g1_i1_len_534_path_1_0_77_79_78_305_79_306_533_4 | 10 | ubiquitin (ribosomal protein l40)                                                   | 178 | 5.88E-100 | 90.60% | 0.128  | IPR000626 (SMART); G3DSA:3.10.20.90 (GENE3D); G3DSA:3.10.20.90 (GENE3D); IPR000626 (PFAM); PTHR10666 (PANTHER); IPR000626 (PROSITE_PROFILES); IPR000626 (PROSITE_PROFILES); IPR029071 (SUPERFAMILY); IPR029071 (SUPERFAMILY)                                                                                                                                                                                                                                                                                                                                                                                                                                                                   |



|     |                                        |    |                                                                   |     |           |        |        |                                                                                                                                                                                                                                                                                                                                                                                                                                                                                                                                                                                             |
|-----|----------------------------------------|----|-------------------------------------------------------------------|-----|-----------|--------|--------|---------------------------------------------------------------------------------------------------------------------------------------------------------------------------------------------------------------------------------------------------------------------------------------------------------------------------------------------------------------------------------------------------------------------------------------------------------------------------------------------------------------------------------------------------------------------------------------------|
| 562 | c15064_g1_i1_len_497_path_607_0_496_4  | 15 | aael017480- partial                                               | 166 | 2.02E-27  | 56.40% | 0.27   | IPR002110 (PRINTS); IPR002110 (SMART); IPR020683 (G3DSA:1.25.40.GENE3D); IPR002110 (PFAM); IPR020683 (PFAM); PTHR24198 (PANTHER); IPR002110 (PROSITE_PROFILES); IPR002110 (PROSITE_PROFILES); IPR020683 (PROSITE_PROFILES); IPR002110 (PROSITE_PROFILES); IPR020683 (SUPERFAMILY)                                                                                                                                                                                                                                                                                                           |
| 563 | c150793_g1_i1_len_776_path_754_0_775_1 | 18 | glycoprotein-n-acetylgalactosamine 3-beta-galactosyltransferase 1 | 259 | 8.70E-93  | 75.10% | 0.1    | IPR003378 (PFAM); PTHR23033 (PANTHER)                                                                                                                                                                                                                                                                                                                                                                                                                                                                                                                                                       |
| 566 | c1508_g1_i1_len_913_path_891_0_912_2   | 48 | sortilin-related receptor-like                                    | 304 | 2.55E-115 | 71.30% | 0.121  | IPR006581 (SMART); G3DSA:2.130.10.140 (GENE3D); IPR002860 (PFAM); PTHR12106:SF7 (PANTHER); PTHR12106 (PANTHER); SSF110296 (SUPERFAMILY)                                                                                                                                                                                                                                                                                                                                                                                                                                                     |
| 564 | c150868_g1_i1_len_492_path_470_0_491_4 | 11 | receptor-type tyrosine-protein phosphatase v-like                 | 164 | 1.32E-09  | 64.70% | 0.203  | IPR029021 (G3DSA:3.90.190.GENE3D); PTHR19134 (PANTHER); CYTOPLASMIC_DOMAIN (PHOBIUS); NON_CYTOPLASMIC_DOMAIN (PHOBIUS); TRANSMEMBRANE (PHOBIUS); IPR000242 (PROSITE_PROFILES); IPR029021 (SUPERFAMILY); TMhelix (TMHMM)                                                                                                                                                                                                                                                                                                                                                                     |
| 565 | c150892_g1_i1_len_850_path_864_0_849_1 | 24 | xanthine dehydrogenase isoform x1                                 | 283 | 1.54E-119 | 76.30% | 0.106  | IPR008274 (G3DSA:3.30.365.GENE3D); IPR008274 (G3DSA:3.30.365.GENE3D); IPR008274 (PFAM); PTHR11908 (PANTHER); PTHR11908:SF32 (PANTHER); IPR008274 (SUPERFAMILY)                                                                                                                                                                                                                                                                                                                                                                                                                              |
| 567 | c150943_g1_i1_len_584_path_562_0_583_3 | 10 | gamma-glutamyltransferase 7                                       | 195 | 5.69E-32  | 67.00% | 0.201  | IPR000101 (PRINTS); IPR000101 (PFAM); IPR000101 (PANTHER); PTHR11686:SF18 (PANTHER); CYTOPLASMIC_DOMAIN (PHOBIUS); TRANSMEMBRANE (PHOBIUS); NON_CYTOPLASMIC_DOMAIN (PHOBIUS); TRANSMEMBRANE (PHOBIUS); NON_CYTOPLASMIC_DOMAIN (PHOBIUS); IPR029055 (SUPERFAMILY); TMhelix (TMHMM); TMhelix (TMHMM)                                                                                                                                                                                                                                                                                          |
| 568 | c150946_g1_i1_len_914_path_892_0_913_1 | 18 | vascular endothelial growth factor receptor 1                     | 305 | 4.51E-33  | 46.40% | 0.113  | IPR003599 (SMART); IPR003598 (SMART); IPR013098 (PFAM); IPR013783 (G3DSA:2.60.40.GENE3D); IPR013783 (G3DSA:2.60.40.GENE3D); PF13895 (PFAM); PTHR10489:SF518 (PANTHER); PTHR10489 (PANTHER); IPR007110 (PROSITE_PROFILES); IPR007110 (PROSITE_PROFILES); SSF48726 (SUPERFAMILY); SSF48726 (SUPERFAMILY); SSF48726 (SUPERFAMILY)                                                                                                                                                                                                                                                              |
| 569 | c15106_g2_i1_len_580_path_558_0_579_0  | 9  | zinc finger protein 729- partial                                  | 194 | 2.58E-24  | 57.20% | 0.098  | IPR015880 (SMART); PF13912 (PFAM); IPR007087 (PFAM); PF13465 (PFAM); IPR013087 (G3DSA:3.30.160.GENE3D); IPR013087 (G3DSA:3.30.160.GENE3D); IPR013087 (G3DSA:3.30.160.GENE3D); PTHR24409 (PANTHER); IPR007087 (PROSITE_PATTERNS); IPR007087 (PROSITE_PATTERNS); IPR007087 (PROSITE_PATTERNS); IPR007087 (PROSITE_PATTERNS); IPR007087 (PROSITE_PROFILES); IPR007087 (PROSITE_PROFILES); IPR007087 (PROSITE_PROFILES); SSF57667 (SUPERFAMILY); SSF57667 (SUPERFAMILY); SSF57667 (SUPERFAMILY)                                                                                                 |
| 570 | c151081_g1_i1_len_826_path_804_0_825_2 | 66 | insulin-like growth factor-binding protein 7 precursor            | 275 | 4.97E-74  | 58.90% | 0.544Y | IPR000867 (SMART); IPR003598 (SMART); IPR002350 (SMART); G3DSA:3.30.60.30 (GENE3D); IPR013098 (PFAM); IPR000867 (PFAM); IPR002350 (PFAM); IPR013783 (G3DSA:2.60.40.GENE3D); IPR011390 (PANTHER); PTHR14186:SF9 (PANTHER); NON_CYTOPLASMIC_DOMAIN (PHOBIUS); SIGNAL_PEPTIDE_N_REGION (PHOBIUS); SIGNAL_PEPTIDE_H_REGION (PHOBIUS); SIGNAL_PEPTIDE_C_REGION (PHOBIUS); SIGNAL_PEPTIDE (PHOBIUS); IPR002350 (PROSITE_PROFILES); IPR000867 (PROSITE_PROFILES); IPR007110 (PROSITE_PROFILES); SignalP-TM (SIGNALP_EUK); SSF100895 (SUPERFAMILY); SSF48726 (SUPERFAMILY); IPR009030 (SUPERFAMILY) |
| 571 | c15117_g3_i1_len_639_path_617_0_638_4  | 25 | ---NA---                                                          | 213 |           |        | 0.149  | TRANSMEMBRANE (PHOBIUS); TRANSMEMBRANE (PHOBIUS); NON_CYTOPLASMIC_DOMAIN (PHOBIUS); CYTOPLASMIC_DOMAIN (PHOBIUS); NON_CYTOPLASMIC_DOMAIN (PHOBIUS); TMhelix (TMHMM)                                                                                                                                                                                                                                                                                                                                                                                                                         |
| 572 | c151198_g1_i1_len_945_path_1_0_944_1   | 38 | lachesin                                                          | 315 | 6.82E-139 | 81.00% | 0.374Y | IPR013106 (SMART); IPR003599 (SMART); IPR003598 (SMART); IPR013098 (PFAM); IPR016243 (PIRSF); IPR013783 (G3DSA:2.60.40.GENE3D); IPR013783 (G3DSA:2.60.40.GENE3D); PF13895 (PFAM); PTHR19831:SF43 (PANTHER); PTHR19831 (PANTHER); SIGNAL_PEPTIDE_C_REGION (PHOBIUS); SIGNAL_PEPTIDE_H_REGION (PHOBIUS); SIGNAL_PEPTIDE (PHOBIUS); NON_CYTOPLASMIC_DOMAIN (PHOBIUS); SIGNAL_PEPTIDE_N_REGION (PHOBIUS); IPR007110 (PROSITE_PROFILES); IPR007110 (PROSITE_PROFILES); SSF48726 (SUPERFAMILY); SSF48726 (SUPERFAMILY); TMhelix (TMHMM)                                                           |
| 573 | c151330_g1_i1_len_385_path_1_0_384_1   | 9  | collagen alpha-5 chain                                            | 128 | 9.60E-18  | 58.20% | 0.099  | IPR008160 (PFAM); PTHR24023 (PANTHER); PTHR24023:SF379 (PANTHER)                                                                                                                                                                                                                                                                                                                                                                                                                                                                                                                            |
| 574 | c151391_g1_i1_len_806_path_1_0_805_1   | 33 | folistatin-related protein 5-like                                 | 269 | 1.32E-160 | 88.30% | 0.121  | PTHR10913 (PANTHER); PTHR10913:SF14 (PANTHER)                                                                                                                                                                                                                                                                                                                                                                                                                                                                                                                                               |

|     |                                           |     |                                              |      |          |        |        |                                                                                                                                                                                                                                                                                                                                                                                                                                                                                                                                                                                                                                                    |
|-----|-------------------------------------------|-----|----------------------------------------------|------|----------|--------|--------|----------------------------------------------------------------------------------------------------------------------------------------------------------------------------------------------------------------------------------------------------------------------------------------------------------------------------------------------------------------------------------------------------------------------------------------------------------------------------------------------------------------------------------------------------------------------------------------------------------------------------------------------------|
| 575 | c151443_g1_i1_len_477_path_455_0_476_0    | 24  | heat shock 70 kda protein 14                 | 159  | 1.95E-31 | 54.90% | 0.125  | IPR029047 (G3DSA:2.60.34.GENE3D); IPR013126 (PFAM); G3DSA:3.30.420.40 (GENE3D); PTHR19375:SF158 (PANTHER); PTHR19375 (PANTHER); IPR018181 (PROSITE_PATTERNS); IPR029047 (SUPERFAMILY); SSF53067 (SUPERFAMILY)                                                                                                                                                                                                                                                                                                                                                                                                                                      |
| 576 | c151594_g1_i1_len_510_path_1_0_509_3      | 12  | zinc finger protein 777- partial             | 170  | 1.25E-13 | 73.90% | 0.122  | IPR015880 (SMART); PF13465 (PFAM); IPR013087 (G3DSA:3.30.160.GENE3D); IPR013087 (G3DSA:3.30.160.GENE3D); PTHR24409 (PANTHER); IPR007087 (PROSITE_PATTERNS); IPR007087 (PROSITE_PATTERNS); IPR007087 (PROSITE_PROFILES); IPR007087 (PROSITE_PROFILES); SSF57667 (SUPERFAMILY)                                                                                                                                                                                                                                                                                                                                                                       |
| 577 | c151693_g1_i1_len_1188_path_1166_0_1187_1 | 22  | protein flightless-1                         | 396  | 0        | 86.20% | 0.102  | Coil (COILS); IPR007122 (PRINTS); IPR007122 (SMART); IPR001611 (PFAM); IPR029006 (G3DSA:3.40.20.GENE3D); IPR007123 (PFAM); G3DSA:3.80.10.10 (GENE3D); IPR029006 (G3DSA:3.40.20.GENE3D); IPR029919 (PTHR11977:PANTHER); IPR007122 (PANTHER); SSF55753 (SUPERFAMILY); SSF55753 (SUPERFAMILY); SSF52058 (SUPERFAMILY)                                                                                                                                                                                                                                                                                                                                 |
| 578 | c151706_g1_i1_len_260_path_1_0_259_2      | 7   | carboxypeptidase b-like                      | 86   | 8.08E-28 | 76.20% | 0.125  | IPR000834 (PFAM); G3DSA:3.40.630.10 (GENE3D); PTHR11705 (PANTHER); SSF53187 (SUPERFAMILY)                                                                                                                                                                                                                                                                                                                                                                                                                                                                                                                                                          |
| 579 | c151866_g1_i1_len_761_path_12_0_760_0     | 19  | apolipophorin precursor                      | 254  | 5.73E-41 | 51.60% | 0.111  | IPR014853 (SMART); IPR001846 (PFAM); IPR014853 (PFAM); PTHR23361 (PANTHER); PTHR23361:SF13 (PANTHER); IPR001846 (PROSITE_PROFILES)                                                                                                                                                                                                                                                                                                                                                                                                                                                                                                                 |
| 580 | c151873_g1_i1_len_261_path_1_0_260_4      | 6   | adamts-like protein 4 isoform x1             | 87   | 4.05E-31 | 57.20% | 0.119  | IPR000884 (SMART); G3DSA:2.20.100.10 (GENE3D); IPR000884 (PFAM); PTHR13723 (PANTHER); IPR000884 (PROSITE_PROFILES); IPR000884 (SUPERFAMILY); IPR000884 (SUPERFAMILY)                                                                                                                                                                                                                                                                                                                                                                                                                                                                               |
| 581 | c15193_g1_i1_len_393_path_371_0_392_5     | 9   | serine threonine-protein kinase 17b-like     | 131  | 2.78E-39 | 82.20% | 0.411Y | IPR000719 (PFAM); G3DSA:1.10.510.10 (GENE3D); PTHR24342 (PANTHER); IPR000719 (PROSITE_PROFILES); IPR011009 (SUPERFAMILY)                                                                                                                                                                                                                                                                                                                                                                                                                                                                                                                           |
| 582 | c15193_g2_i1_len_177_path_895_0_176_4     | 2   | serine threonine-protein kinase 17a-like     | 59   | 2.18E-28 | 94.00% | 0.101  | IPR000719 (PFAM); G3DSA:1.10.510.10 (GENE3D); PTHR24342 (PANTHER); IPR008271 (PROSITE_PATTERNS); IPR000719 (PROSITE_PROFILES); IPR011009 (SUPERFAMILY)                                                                                                                                                                                                                                                                                                                                                                                                                                                                                             |
| 583 | c151946_g1_i1_len_572_path_1_0_571_4      | 9   | low quality protein: zinc finger protein 233 | 191  | 5.90E-47 | 69.20% | 0.165  | IPR015880 (SMART); IPR013087 (G3DSA:3.30.160.GENE3D); IPR013087 (G3DSA:3.30.160.GENE3D); PF13465 (PFAM); IPR013087 (G3DSA:3.30.160.GENE3D); PTHR24409 (PANTHER); PTHR24409:SF13 (PANTHER); IPR007087 (PROSITE_PATTERNS); IPR007087 (PROSITE_PATTERNS); IPR007087 (PROSITE_PATTERNS); IPR007087 (PROSITE_PATTERNS); IPR007087 (PROSITE_PROFILES); IPR007087 (PROSITE_PROFILES); IPR007087 (PROSITE_PROFILES); IPR007087 (PROSITE_PROFILES); IPR007087 (PROSITE_PROFILES); SSF57667 (SUPERFAMILY); SSF57667 (SUPERFAMILY); SSF57667 (SUPERFAMILY)                                                                                                    |
| 584 | c151970_g1_i1_len_449_path_1_0_448_3      | 8   | cytokine receptor                            | 150  | 7.49E-39 | 69.60% | 0.113  | IPR003961 (SMART); IPR003961 (PFAM); IPR013783 (G3DSA:2.60.40.GENE3D); PTHR10489 (PANTHER); IPR003961 (PROSITE_PROFILES); IPR003961 (PROSITE_PROFILES); IPR003961 (SUPERFAMILY)                                                                                                                                                                                                                                                                                                                                                                                                                                                                    |
| 585 | c151998_g1_i1_len_442_path_1_0_441_1      | 12  | crustacean cardioactive peptide              | 147  | 1.67E-14 | 64.80% | 0.102  | IPR024276 (PFAM); NON_CYTOPLASMIC_DOMAIN (PHOBIUS); CYTOPLASMIC_DOMAIN (PHOBIUS); TRANSMEMBRANE (PHOBIUS); IPR024276 (PRODOM); TMhelix (TMHMM)                                                                                                                                                                                                                                                                                                                                                                                                                                                                                                     |
| 586 | c152186_g1_i1_len_603_path_581_0_602_5    | 27  | gastrula zinc finger isoform x1              | 201  | 2.05E-64 | 68.20% | 0.105  | IPR015880 (SMART); PF13465 (PFAM); IPR013087 (G3DSA:3.30.160.GENE3D); IPR013087 (G3DSA:3.30.160.GENE3D); IPR013087 (G3DSA:3.30.160.GENE3D); IPR013087 (G3DSA:3.30.160.GENE3D); PTHR24409 (PANTHER); IPR007087 (PROSITE_PATTERNS); IPR007087 (PROSITE_PATTERNS); IPR007087 (PROSITE_PATTERNS); IPR007087 (PROSITE_PATTERNS); IPR007087 (PROSITE_PATTERNS); IPR007087 (PROSITE_PATTERNS); IPR007087 (PROSITE_PROFILES); IPR007087 (PROSITE_PROFILES); IPR007087 (PROSITE_PROFILES); IPR007087 (PROSITE_PROFILES); IPR007087 (PROSITE_PROFILES); IPR007087 (PROSITE_PROFILES); SSF57667 (SUPERFAMILY); SSF57667 (SUPERFAMILY); SSF57667 (SUPERFAMILY) |
| 587 | c15222_g1_i1_len_3156_path_3184_0_3155_2  | 356 | agap000560-pa-like protein                   | 1052 | 0        | 77.80% | 0.166  | IPR003593 (SMART); G3DSA:1.10.8.60 (GENE3D); IPR027417 (G3DSA:3.40.50.GENE3D); IPR003959 (PFAM); IPR005936 (TIGRFAM); IPR000642 (PFAM); PTHR23076 (PANTHER); PTHR23076:SF47 (PANTHER); NON_CYTOPLASMIC_DOMAIN (PHOBIUS); NON_CYTOPLASMIC_DOMAIN (PHOBIUS); TRANSMEMBRANE (PHOBIUS); CYTOPLASMIC_DOMAIN (PHOBIUS); TRANSMEMBRANE (PHOBIUS); TRANSMEMBRANE (PHOBIUS); CYTOPLASMIC_DOMAIN (PHOBIUS); IPR005936 (HAMAP); IPR027417 (SUPERFAMILY); SSF140990 (SUPERFAMILY); TMhelix (TMHMM); TMhelix (TMHMM)                                                                                                                                            |

|     |                                                     |    |                                                                      |     |           |        |        |                                                                                                                                                                                                                                                                                                                                                                                                                                                 |
|-----|-----------------------------------------------------|----|----------------------------------------------------------------------|-----|-----------|--------|--------|-------------------------------------------------------------------------------------------------------------------------------------------------------------------------------------------------------------------------------------------------------------------------------------------------------------------------------------------------------------------------------------------------------------------------------------------------|
| 588 | c152413_g1_i1_len_643_path_621_0_642_1              | 23 | beta- -n-acetylgalactosaminyltransferase bre-4                       | 214 | 1.78E-17  | 63.70% | 0.099  | Coil (COILS); IPR029044 (G3DSA:3.90.550.GENE3D); IPR027995 (PFAM); IPR003859 (PANTHER); IPR029044 (SUPERFAMILY)                                                                                                                                                                                                                                                                                                                                 |
| 589 | c152413_g1_i1_len_643_path_621_0_642_2              | 23 | beta- -n-acetylgalactosaminyltransferase bre- partial                | 214 | 5.41E-16  | 62.00% | 0.14   | IPR003859 (PRINTS); IPR029044 (G3DSA:3.90.550.GENE3D); IPR027791 (PFAM); IPR003859 (PANTHER); IPR029044 (SUPERFAMILY)                                                                                                                                                                                                                                                                                                                           |
| 590 | c15251_g2_i1_len_439_path_915_0_438_1               | 6  | basement membrane-specific heparan sulfate proteoglycan core protein | 146 | 4.33E-12  | 64.40% | 0.201  | IPR002172 (SMART); IPR002172 (PFAM); IPR002172 (G3DSA:4.10.400.GENE3D); PTHR10529:SF3 (PANTHER); PTHR10529 (PANTHER); IPR023415 (PROSITE_PATTERNS); IPR002172 (PROSITE_PROFILES); IPR002172 (SUPERFAMILY)                                                                                                                                                                                                                                       |
| 591 | c152604_g1_i1_len_371_path_1_0_370_4                | 6  | transforming growth factor-beta-induced protein ig-h3-like           | 124 | 1.07E-10  | 60.40% | 0.581Y | IPR000782 (G3DSA:2.30.180.GENE3D); IPR000782 (PFAM); PTHR10900 (PANTHER); IPR000782 (PROSITE_PROFILES); SignalP-noTM (SIGNALP_EUK); IPR000782 (SUPERFAMILY)                                                                                                                                                                                                                                                                                     |
| 592 | c15261_g1_i1_len_157_path_135_0_156_3               | 3  | laminin subunit alpha                                                | 53  | 1.58E-16  | 78.40% | 0.102  | IPR002049 (SMART); IPR002049 (PFAM); G3DSA:2.10.25.10 (GENE3D); PTHR10574 (PANTHER); PTHR10574:SF39 (PANTHER); IPR002049 (PROSITE_PROFILES); SSF57196 (SUPERFAMILY)                                                                                                                                                                                                                                                                             |
| 593 | c152630_g1_i1_len_378_path_1_0_377_0                | 34 | blastula protease 10-like                                            | 126 | 3.03E-16  | 50.10% | 0.104  | IPR000859 (PFAM); IPR000859 (G3DSA:2.60.120.GENE3D); IPR000859 (PROSITE_PROFILES); IPR000859 (SUPERFAMILY)                                                                                                                                                                                                                                                                                                                                      |
| 594 | c152663_g1_i1_len_248_path_1_0_247_1                | 2  | oocyte zinc finger protein xlcof22                                   | 83  | 6.48E-17  | 60.90% | 0.097  | IPR015880 (SMART); IPR013087 (G3DSA:3.30.160.GENE3D); IPR013087 (G3DSA:3.30.160.GENE3D); IPR007087 (PFAM); PTHR24409:SF14 (PANTHER); PTHR24409 (PANTHER); IPR007087 (PROSITE_PATTERNS); IPR007087 (PROSITE_PATTERNS); IPR007087 (PROSITE_PROFILES); IPR007087 (PROSITE_PROFILES); SSF57667 (SUPERFAMILY)                                                                                                                                        |
| 595 | c152721_g1_i1_len_302_path_280_0_301_0              | 13 | xanthine dehydrogenase isoform x1                                    | 101 | 2.28E-26  | 74.30% | 0.098  | IPR000674 (PFAM); IPR000674 (G3DSA:3.90.1170.GENE3D); PTHR11908:SF32 (PANTHER); PTHR11908 (PANTHER); IPR000674 (SUPERFAMILY)                                                                                                                                                                                                                                                                                                                    |
| 596 | c152800_g1_i1_len_630_path_608_0_629_0              | 12 | ring finger and spry domain-containing protein 1-like                | 210 | 2.61E-108 | 82.30% | 0.127  | PTHR13363 (PANTHER); IPR016024 (SUPERFAMILY); IPR013320 (SUPERFAMILY)                                                                                                                                                                                                                                                                                                                                                                           |
| 597 | c152840_g1_i1_len_327_path_1_0_326_5                | 6  | xdh protein                                                          | 109 | 6.80E-21  | 61.60% | 0.103  | IPR000674 (SMART); IPR000674 (PFAM); IPR000674 (G3DSA:3.90.1170.GENE3D); IPR008274 (G3DSA:3.30.365.GENE3D); PTHR11908 (PANTHER); PTHR11908:SF65 (PANTHER); IPR000674 (SUPERFAMILY)                                                                                                                                                                                                                                                              |
| 598 | c152885_g1_i1_len_468_path_446_0_467_5              | 11 | #NAME?                                                               | 156 | 3.61E-74  | 83.90% | 0.131  | G3DSA:3.40.50.2000 (GENE3D); IPR001830 (PFAM); PTHR10788 (PANTHER); PTHR10788:SF6 (PANTHER); SSF53756 (SUPERFAMILY)                                                                                                                                                                                                                                                                                                                             |
| 599 | c152888_g1_i1_len_366_path_344_0_365_1              | 6  | zinc finger protein 850-like                                         | 122 | 2.41E-18  | 55.00% | 0.099  | IPR015880 (SMART); PF13465 (PFAM); IPR013087 (G3DSA:3.30.160.GENE3D); IPR013087 (G3DSA:3.30.160.GENE3D); IPR013087 (G3DSA:3.30.160.GENE3D); IPR007087 (PFAM); PTHR24409 (PANTHER); PTHR24409:SF14 (PANTHER); IPR007087 (PROSITE_PATTERNS); IPR007087 (PROSITE_PATTERNS); IPR007087 (PROSITE_PATTERNS); IPR007087 (PROSITE_PROFILES); IPR007087 (PROSITE_PROFILES); IPR007087 (PROSITE_PROFILES); SSF57667 (SUPERFAMILY); SSF57667 (SUPERFAMILY) |
| 600 | c15291_g1_i1_len_794_path_628_0_627_155_1_628_793_4 | 24 | sortilin-related I(dlr class) a repeats-containing-like isoform x2   | 265 | 2.16E-17  | 55.40% | 0.278  | Coil (COILS); Coil (COILS); IPR002172 (PRINTS); IPR002172 (SMART); IPR002172 (G3DSA:4.10.400.GENE3D); IPR002172 (PFAM); IPR002172 (G3DSA:4.10.400.GENE3D); PTHR10529 (PANTHER); IPR023415 (PROSITE_PATTERNS); IPR023415 (PROSITE_PATTERNS); IPR002172 (PROSITE_PROFILES); IPR002172 (PROSITE_PROFILES); IPR002172 (SUPERFAMILY); IPR002172 (SUPERFAMILY)                                                                                        |
| 601 | c152964_g1_i1_len_429_path_1_0_428_3                | 9  | alpha platelet-derived growth factor receptor                        | 143 | 2.84E-19  | 46.60% | 0.111  | PF13895 (PFAM); IPR013783 (G3DSA:2.60.40.GENE3D); SSF48726 (SUPERFAMILY)                                                                                                                                                                                                                                                                                                                                                                        |
| 602 | c153145_g1_i1_len_648_path_626_0_647_3              | 11 | glyceraldehyde-3-phosphate dehydrogenase                             | 216 | 2.97E-137 | 92.60% | 0.102  | IPR020831 (PRINTS); IPR020828 (SMART); IPR020828 (PFAM); IPR016040 (G3DSA:3.40.50.GENE3D); IPR020829 (PFAM); G3DSA:3.30.360.10 (GENE3D); IPR020831 (PANTHER); IPR020830 (PROSITE_PATTERNS); SSF51735 (SUPERFAMILY); SSF55347 (SUPERFAMILY)                                                                                                                                                                                                      |
| 603 | c153149_g1_i1_len_276_path_1_0_275_3                | 6  | ---NA---                                                             | 92  |           |        | 0.576Y | IPR012674 (G3DSA:2.40.128.GENE3D); SIGNAL_PEPTIDE_H_REGION (PHOBIUS); SIGNAL_PEPTIDE (PHOBIUS); NON_CYTOPLASMIC_DOMAIN (PHOBIUS); SIGNAL_PEPTIDE_N_REGION (PHOBIUS); SIGNAL_PEPTIDE_C_REGION (PHOBIUS); SignalP-TM (SIGNALP_EUK); IPR011038 (SUPERFAMILY); TMhelix (TMHMM)                                                                                                                                                                      |

|     |                                                             |     |                                                                                                                                                                            |     |          |        |       |                                                                                                                                                                                                                                                                                                                                                                                                                                                                                                                                                                                                      |
|-----|-------------------------------------------------------------|-----|----------------------------------------------------------------------------------------------------------------------------------------------------------------------------|-----|----------|--------|-------|------------------------------------------------------------------------------------------------------------------------------------------------------------------------------------------------------------------------------------------------------------------------------------------------------------------------------------------------------------------------------------------------------------------------------------------------------------------------------------------------------------------------------------------------------------------------------------------------------|
| 604 | c153194_g1_i1_len_461_path_51_0_460_4                       | 8   | zinc finger protein 420-like                                                                                                                                               | 154 | 3.02E-30 | 61.20% | 0.101 | IPR015880 (SMART); IPR013087 (G3DSA:3.30.160.GENE3D); IPR007087 (PFAM); PF13894 (PFAM); IPR013087 (G3DSA:3.30.160.GENE3D); PF13465 (PFAM); PTHR24409 (PANTHER); PTHR24409:SF13 (PANTHER); IPR007087 (PROSITE_PATTERNS); IPR007087 (PROSITE_PATTERNS); IPR007087 (PROSITE_PATTERNS); IPR007087 (PROSITE_PATTERNS); IPR007087 (PROSITE_PROFILES); IPR007087 (PROSITE_PROFILES); IPR007087 (PROSITE_PROFILES); IPR007087 (PROSITE_PROFILES); IPR007087 (PROSITE_PROFILES); IPR007087 (PROSITE_PROFILES); SSF57667 (SUPERFAMILY); SSF57667 (SUPERFAMILY); SSF57667 (SUPERFAMILY); SSF57667 (SUPERFAMILY) |
| 605 | c153235_g1_i1_len_470_path_1_0_469_4                        | 7   | a disintegrin and metalloproteinase with thrombospondin motifs 3-like                                                                                                      | 157 | 6.49E-65 | 69.00% | 0.126 | PR01705 (PRINTS); IPR000884 (SMART); G3DSA:2.20.100.10 (GENE3D); IPR000884 (PFAM); PTHR13723 (PANTHER); IPR000884 (PROSITE_PROFILES); IPR000884 (SUPERFAMILY)                                                                                                                                                                                                                                                                                                                                                                                                                                        |
| 606 | c153266_g1_i1_len_397_path_375_0_396_1                      | 5   | cysteine-rich motor neuron 1 protein                                                                                                                                       | 132 | 1.76E-09 | 54.90% | 0.157 | SIGNAL_PEPTIDE (PHOBIUS); SIGNAL_PEPTIDE_N_REGION (PHOBIUS); NON_CYTOPLASMIC_DOMAIN (PHOBIUS); SIGNAL_PEPTIDE_C_REGION (PHOBIUS); SIGNAL_PEPTIDE_H_REGION (PHOBIUS); TMhelix (TMHMM)                                                                                                                                                                                                                                                                                                                                                                                                                 |
| 607 | c153609_g1_i1_len_629_path_607_0_628_4                      | 22  | basement membrane-specific heparan sulfate proteoglycan core isoform x2                                                                                                    | 210 | 3.30E-93 | 78.50% | 0.102 | IPR013106 (SMART); IPR003598 (SMART); IPR003599 (SMART); IPR013783 (G3DSA:2.60.40.GENE3D); IPR013106 (PFAM); PF13895 (PFAM); PTHR23279 (PANTHER); PTHR23279:SF6 (PANTHER); IPR007110 (PROSITE_PROFILES); IPR007110 (PROSITE_PROFILES); SSF48726 (SUPERFAMILY); SSF48726 (SUPERFAMILY)                                                                                                                                                                                                                                                                                                                |
| 608 | c153785_g1_i1_len_492_path_470_0_491_2                      | 12  | group xv phospholipase a2-like                                                                                                                                             | 164 | 2.20E-59 | 70.20% | 0.119 | IPR003386 (PFAM); PTHR11440 (PANTHER); PTHR11440:SF47 (PANTHER); IPR029058 (SUPERFAMILY)                                                                                                                                                                                                                                                                                                                                                                                                                                                                                                             |
| 609 | c153924_g1_i1_len_552_path_600_0_551_4                      | 10  | zinc finger protein 271 (zinc finger protein 7) (zinc finger protein znfphe133) (epstein-barr virus-induced zinc finger protein) (znf-eb) (ct-zfp48) (zinc finger protein) | 184 | 5.00E-23 | 55.60% | 0.121 | IPR015880 (SMART); IPR007087 (PFAM); IPR013087 (G3DSA:3.30.160.GENE3D); PF13894 (PFAM); IPR013087 (G3DSA:3.30.160.GENE3D); IPR013087 (G3DSA:3.30.160.GENE3D); PTHR24409 (PANTHER); PTHR24409:SF14 (PANTHER); IPR007087 (PROSITE_PATTERNS); IPR007087 (PROSITE_PATTERNS); IPR007087 (PROSITE_PATTERNS); IPR007087 (PROSITE_PATTERNS); IPR007087 (PROSITE_PROFILES); IPR007087 (PROSITE_PROFILES); IPR007087 (PROSITE_PROFILES); IPR007087 (PROSITE_PROFILES); SSF57667 (SUPERFAMILY); SSF57667 (SUPERFAMILY); SSF57667 (SUPERFAMILY)                                                                  |
| 611 | c15396_g1_i1_len_991_path_1_0_990_1                         | 262 | sulfakinin-like peptide                                                                                                                                                    | 330 | 8.48E-16 | 65.70% | 0.205 | IPR013152 (PROSITE_PATTERNS); IPR013152 (PROSITE_PATTERNS); TRANSMEMBRANE (PHOBIUS); CYTOPLASMIC_DOMAIN (PHOBIUS); TRANSMEMBRANE (PHOBIUS); NON_CYTOPLASMIC_DOMAIN (PHOBIUS); CYTOPLASMIC_DOMAIN (PHOBIUS); TMhelix (TMHMM)                                                                                                                                                                                                                                                                                                                                                                          |
| 610 | c153960_g1_i1_len_509_path_1_0_508_2                        | 19  | serine beta-lactamase-like protein mitochondrial isoform x2                                                                                                                | 169 | 1.01E-57 | 74.40% | 0.107 | Coil (COILS); IPR001466 (PFAM); IPR012338 (G3DSA:3.40.710.GENE3D); PTHR22935 (PANTHER); PTHR22935:SF64 (PANTHER); IPR012338 (SUPERFAMILY)                                                                                                                                                                                                                                                                                                                                                                                                                                                            |
| 612 | c154126_g1_i1_len_400_path_378_0_399_1                      | 19  | collagen alpha-5 chain                                                                                                                                                     | 133 | 9.03E-12 | 66.10% | 0.131 | IPR008160 (PFAM); PTHR24023:SF381 (PANTHER); PTHR24023 (PANTHER); TRANSMEMBRANE (PHOBIUS); CYTOPLASMIC_DOMAIN (PHOBIUS); NON_CYTOPLASMIC_DOMAIN (PHOBIUS); TMhelix (TMHMM)                                                                                                                                                                                                                                                                                                                                                                                                                           |
| 613 | c154126_g1_i1_len_400_path_378_0_399_4                      | 19  | signal recognition protein                                                                                                                                                 | 133 | 1.19E-07 | 54.00% | 0.122 | no IPS match                                                                                                                                                                                                                                                                                                                                                                                                                                                                                                                                                                                         |
| 615 | c1543_g1_i1_len_923_path_45_0_278_323_2_79_548_44_549_922_4 | 17  | protein partial                                                                                                                                                            | 308 | 8.80E-68 | 77.10% | 0.106 | IPR001478 (SMART); IPR001478 (G3DSA:2.30.42.GENE3D); IPR001478 (PFAM); IPR016313 (PANTHER); IPR001478 (PROSITE_PROFILES); IPR001478 (SUPERFAMILY)                                                                                                                                                                                                                                                                                                                                                                                                                                                    |
| 616 | c1543_g1_i2_len_653_path_45_0_278_44_27_9_652_4             | 11  | low quality protein: protein lap4-like                                                                                                                                     | 218 | 5.86E-39 | 79.80% | 0.106 | IPR001478 (SMART); IPR001478 (PFAM); IPR001478 (G3DSA:2.30.42.GENE3D); IPR016313 (PANTHER); PTHR23119:SF28 (PANTHER); IPR001478 (PROSITE_PROFILES); IPR001478 (SUPERFAMILY)                                                                                                                                                                                                                                                                                                                                                                                                                          |
| 614 | c154383_g1_i1_len_347_path_1_0_346_2                        | 6   | collagen alpha-1 chain                                                                                                                                                     | 115 | 4.32E-07 | 52.90% | 0.103 | IPR008160 (PFAM); PTHR24023 (PANTHER)                                                                                                                                                                                                                                                                                                                                                                                                                                                                                                                                                                |
| 617 | c154455_g1_i1_len_410_path_1_0_409_5                        | 12  | granzyme c                                                                                                                                                                 | 136 | 1.26E-23 | 61.10% | 0.105 | IPR001314 (PRINTS); IPR001254 (SMART); IPR001254 (PFAM); G3DSA:2.40.10.10 (GENE3D); PTHR24268 (PANTHER); IPR018114 (PROSITE_PATTERNS); IPR001254 (PROSITE_PROFILES); IPR009003 (SUPERFAMILY)                                                                                                                                                                                                                                                                                                                                                                                                         |
| 618 | c154766_g1_i1_len_289_path_1_0_288_4                        | 4   | beta- -n-acetylgalactosaminyltransferase bre-4                                                                                                                             | 96  | 3.66E-40 | 78.60% | 0.104 | IPR003859 (PRINTS); IPR029044 (G3DSA:3.90.550.GENE3D); IPR027791 (PFAM); IPR003859 (PANTHER); IPR029044 (SUPERFAMILY)                                                                                                                                                                                                                                                                                                                                                                                                                                                                                |
| 619 | c154852_g1_i1_len_421_path_399_0_420_3                      | 7   | zinc finger protein 271 (zinc finger protein 7) (zinc finger protein znfphe133) (epstein-barr virus-induced zinc finger protein) (znf-eb) (ct-zfp48) (zinc finger protein) | 141 | 5.34E-18 | 63.20% | 0.1   | IPR015880 (SMART); IPR013087 (G3DSA:3.30.160.GENE3D); PF13465 (PFAM); IPR013087 (G3DSA:3.30.160.GENE3D); IPR013087 (G3DSA:3.30.160.GENE3D); PTHR24409 (PANTHER); IPR007087 (PROSITE_PATTERNS); IPR007087 (PROSITE_PATTERNS); IPR007087 (PROSITE_PATTERNS); IPR007087 (PROSITE_PATTERNS); IPR007087 (PROSITE_PROFILES); IPR007087 (PROSITE_PROFILES); IPR007087 (PROSITE_PROFILES); IPR007087 (PROSITE_PROFILES); SSF57667 (SUPERFAMILY); SSF57667 (SUPERFAMILY)                                                                                                                                      |

|     |                                                       |     |                                                                        |     |           |        |         |                                                                                                                                                                                                                                                                                                                                                                                                                                                                                                                                                                                                                                             |
|-----|-------------------------------------------------------|-----|------------------------------------------------------------------------|-----|-----------|--------|---------|---------------------------------------------------------------------------------------------------------------------------------------------------------------------------------------------------------------------------------------------------------------------------------------------------------------------------------------------------------------------------------------------------------------------------------------------------------------------------------------------------------------------------------------------------------------------------------------------------------------------------------------------|
| 620 | c155425_g1_i1_len_352_path_330_0_351_2                | 5   | zinc finger protein 431 isoform x2                                     | 117 | 4.88E-13  | 64.50% | 0.126   | IPR015880 (SMART); IPR007087 (PFAM); IPR013087 (G3DSA:3.30.160.GENE3D); IPR013087 (G3DSA:3.30.160.GENE3D); PF13465 (PFAM); PTHR24409 (PANTHER); PTHR24409:SF14 (PANTHER); IPR007087 (PROSITE_PATTERNS); IPR007087 (PROSITE_PATTERNS); IPR007087 (PROSITE_PROFILES); IPR007087 (PROSITE_PROFILES); IPR007087 (PROSITE_PROFILES); SSF57667 (SUPERFAMILY); SSF57667 (SUPERFAMILY)                                                                                                                                                                                                                                                              |
| 621 | c155528_g1_i1_len_591_path_569_0_590_1                | 9   | epidermal growth factor receptor isoform x1                            | 197 | 9.42E-105 | 87.40% | 0.121   | IPR006212 (SMART); IPR006211 (PFAM); G3DSA:2.10.220.10 (GENE3D); G3DSA:2.10.220.10 (GENE3D); IPR000494 (G3DSA:3.80.20.GENE3D); IPR000494 (PFAM); PTHR24416:SF95 (PANTHER); PTHR24416 (PANTHER); IPR009030 (SUPERFAMILY); SSF52058 (SUPERFAMILY)                                                                                                                                                                                                                                                                                                                                                                                             |
| 622 | c155529_g1_i1_len_587_path_565_0_586_1                | 10  | serine protease snake                                                  | 196 | 7.01E-26  | 52.50% | 0.459 Y | IPR001314 (PRINTS); IPR001254 (SMART); IPR001254 (PFAM); G3DSA:2.40.10.10 (GENE3D); G3DSA:2.40.10.10 (GENE3D); PTHR24260 (PANTHER); IPR018114 (PROSITE_PATTERNS); IPR001254 (PROSITE_PROFILES); SignalP-noTM (SIGNALP_EUK); IPR009003 (SUPERFAMILY)                                                                                                                                                                                                                                                                                                                                                                                         |
| 623 | c155596_g1_i1_len_568_path_1_0_567_4                  | 7   | zinc finger protein 629- partial                                       | 189 | 2.33E-13  | 62.40% | 0.096   | IPR015880 (SMART); PF13912 (PFAM); PF13894 (PFAM); IPR013087 (G3DSA:3.30.160.GENE3D); IPR013087 (G3DSA:3.30.160.GENE3D); PTHR24409 (PANTHER); IPR007087 (PROSITE_PATTERNS); IPR007087 (PROSITE_PATTERNS); IPR007087 (PROSITE_PROFILES); IPR007087 (PROSITE_PROFILES); SSF57667 (SUPERFAMILY)                                                                                                                                                                                                                                                                                                                                                |
| 624 | c155823_g1_i1_len_542_path_1_0_541_1                  | 12  | zinc finger protein 699-like                                           | 181 | 2.73E-31  | 56.70% | 0.103   | IPR015880 (SMART); IPR007087 (PFAM); IPR013087 (G3DSA:3.30.160.GENE3D); IPR013087 (G3DSA:3.30.160.GENE3D); IPR013087 (G3DSA:3.30.160.GENE3D); PTHR24409 (PANTHER); PTHR24409:SF14 (PANTHER); IPR007087 (PROSITE_PATTERNS); IPR007087 (PROSITE_PATTERNS); IPR007087 (PROSITE_PATTERNS); IPR007087 (PROSITE_PATTERNS); IPR007087 (PROSITE_PATTERNS); IPR007087 (PROSITE_PATTERNS); IPR007087 (PROSITE_PROFILES); IPR007087 (PROSITE_PROFILES); IPR007087 (PROSITE_PROFILES); IPR007087 (PROSITE_PROFILES); IPR007087 (PROSITE_PROFILES); IPR007087 (PROSITE_PROFILES); SSF57667 (SUPERFAMILY); SSF57667 (SUPERFAMILY); SSF57667 (SUPERFAMILY) |
| 625 | c155929_g1_i1_len_510_path_488_0_509_2                | 17  | carboxypeptidase pm20d1                                                | 170 | 1.19E-11  | 80.30% | 0.108   | G3DSA:3.40.630.10 (GENE3D); NON_CYTOPLASMIC_DOMAIN (PHOBIUS); TRANSMEMBRANE (PHOBIUS); CYTOPLASMIC_DOMAIN (PHOBIUS); TMhelix (TMHMM)                                                                                                                                                                                                                                                                                                                                                                                                                                                                                                        |
| 626 | c155979_g1_i1_len_481_path_459_0_480_0                | 9   | tyramine beta-hydroxylase                                              | 161 | 2.64E-66  | 75.30% | 0.164   | IPR014784 (G3DSA:2.60.120.GENE3D); PF03712 (PFAM); IPR000945 (PANTHER); IPR028460 (PTHR10157:PANTHER); IPR008977 (SUPERFAMILY)                                                                                                                                                                                                                                                                                                                                                                                                                                                                                                              |
| 627 | c155999_g1_i1_len_263_path_241_0_262_1                | 10  | 5 -nucleotidase-like                                                   | 88  | 4.26E-21  | 70.20% | 0.162   | IPR029052 (G3DSA:3.60.21.GENE3D); IPR006179 (PANTHER); PTHR11575:SF21 (PANTHER); IPR006146 (PROSITE_PATTERNS); IPR029052 (SUPERFAMILY)                                                                                                                                                                                                                                                                                                                                                                                                                                                                                                      |
| 628 | c156237_g1_i1_len_434_path_1_0_433_1                  | 7   | a disintegrin and metalloproteinase with thrombospondin motifs partial | 145 | 3.04E-22  | 59.40% | 0.137   | IPR024079 (G3DSA:3.40.390.GENE3D); PTHR13723:SF160 (PANTHER); PTHR13723 (PANTHER); IPR001590 (PROSITE_PROFILES); SSF55486 (SUPERFAMILY)                                                                                                                                                                                                                                                                                                                                                                                                                                                                                                     |
| 629 | c156465_g1_i1_len_324_path_302_0_323_4                | 7   | arylsulfatase d                                                        | 108 | 1.72E-20  | 58.60% | 0.124   | PF14707 (PFAM); G3DSA:3.30.1120.10 (GENE3D); PTHR10342 (PANTHER); PTHR10342:SF200 (PANTHER); IPR017850 (SUPERFAMILY)                                                                                                                                                                                                                                                                                                                                                                                                                                                                                                                        |
| 630 | c1565_g1_i1_len_1380_path_1_0_46_48_47_1379_2         | 88  | zinc finger protein zpr1                                               | 460 | 2.35E-177 | 73.70% | 0.185   | IPR004457 (SMART); IPR004457 (TIGRFAM); IPR004457 (PFAM); PTHR10876:SF0 (PANTHER); PTHR10876 (PANTHER)                                                                                                                                                                                                                                                                                                                                                                                                                                                                                                                                      |
| 631 | c1565_g1_i2_len_1372_path_1445_0_38_48_39_1371_0      | 91  | zinc finger protein zpr1                                               | 458 | 1.25E-177 | 73.80% | 0.126   | IPR004457 (SMART); IPR004457 (TIGRFAM); IPR004457 (PFAM); PTHR10876 (PANTHER); PTHR10876:SF0 (PANTHER)                                                                                                                                                                                                                                                                                                                                                                                                                                                                                                                                      |
| 632 | c1566_g1_i1_len_2494_path_3057_0_532_35_89_533_2493_0 | 171 | von willebrand factor a domain-containing protein partial              | 832 | 0         | 65.50% | 0.117   | PTHR21610 (PANTHER); PTHR21610:SF9 (PANTHER)                                                                                                                                                                                                                                                                                                                                                                                                                                                                                                                                                                                                |
| 633 | c1566_g1_i2_len_825_path_3057_0_532_25_533_824_0      | 47  | von willebrand factor a domain-containing protein 8-like               | 275 | 2.71E-84  | 86.00% | 0.117   | PTHR21610:SF9 (PANTHER); PTHR21610 (PANTHER); TRANSMEMBRANE (PHOBIUS); CYTOPLASMIC_DOMAIN (PHOBIUS); NON_CYTOPLASMIC_DOMAIN (PHOBIUS); TMhelix (TMHMM)                                                                                                                                                                                                                                                                                                                                                                                                                                                                                      |
| 634 | c156720_g1_i1_len_641_path_1_0_640_3                  | 10  | fibroblast growth factor receptor-like 1                               | 214 | 1.34E-40  | 59.70% | 0.098   | IPR003599 (SMART); IPR013098 (PFAM); IPR013783 (G3DSA:2.60.40.GENE3D); PTHR19890 (PANTHER); PTHR19890:SF5 (PANTHER); TRANSMEMBRANE (PHOBIUS); CYTOPLASMIC_DOMAIN (PHOBIUS); NON_CYTOPLASMIC_DOMAIN (PHOBIUS); IPR007110 (PROSITE_PROFILES); SSF48726 (SUPERFAMILY); TMhelix (TMHMM)                                                                                                                                                                                                                                                                                                                                                         |
| 635 | c156724_g1_i1_len_280_path_258_0_279_2                | 4   | hemocentin-1-like                                                      | 93  | 3.32E-14  | 59.10% | 0.128   | IPR013098 (PFAM); IPR013783 (G3DSA:2.60.40.GENE3D); IPR013783 (G3DSA:2.60.40.GENE3D); PTHR10489 (PANTHER); IPR007110 (PROSITE_PROFILES); SSF48726 (SUPERFAMILY)                                                                                                                                                                                                                                                                                                                                                                                                                                                                             |



|     |                                          |        |                                                        |     |          |        |        |                                                                                                                                                                                                                                                                                                                                                                                                                                                                                                                                     |
|-----|------------------------------------------|--------|--------------------------------------------------------|-----|----------|--------|--------|-------------------------------------------------------------------------------------------------------------------------------------------------------------------------------------------------------------------------------------------------------------------------------------------------------------------------------------------------------------------------------------------------------------------------------------------------------------------------------------------------------------------------------------|
| 636 | c156732_g1_i1_len_537_path_515_0_536_2   | 16     | complement c1q tumor necrosis factor-related protein 2 | 179 | 1.44E-27 | 61.50% | 0.624Y | IPR001073 (PRINTS); IPR001073 (SMART); IPR001073 (PFAM); IPR008983 (G3DSA:2.60.120.GENE3D); PTHR22923 (PANTHER); PTHR22923:SF51 (PANTHER); SIGNAL_PEPTIDE (PHOBIUS); SIGNAL_PEPTIDE_C_REGION (PHOBIUS); SIGNAL_PEPTIDE_N_REGION (PHOBIUS); NON_CYTOPLASMIC_DOMAIN (PHOBIUS); SIGNAL_PEPTIDE_H_REGION (PHOBIUS); IPR001073 (PROSITE_PROFILES); SignalP-noTM (SIGNALP_EUK); SignalP-TM (SIGNALP_GRAM_POSITIVE); IPR008983 (SUPERFAMILY); TMhelix (TMHMM); TMhelix (TMHMM)                                                             |
| 637 | c156886_g1_i1_len_321_path_1_0_320_3     | 7      | guanine nucleotide-binding protein subunit beta-5      | 107 | 1.56E-62 | 93.70% | 0.123  | IPR020472 (PRINTS); IPR001680 (SMART); IPR015943 (G3DSA:2.130.10.GENE3D); IPR001680 (PFAM); PTHR19850:SF12 (PANTHER); IPR016346 (PANTHER); IPR019775 (PROSITE_PATTERNS); IPR001680 (PROSITE_PROFILES); IPR001680 (PROSITE_PROFILES); IPR001680 (PROSITE_PROFILES); IPR017986 (PROSITE_PROFILES); IPR017986 (SUPERFAMILY)                                                                                                                                                                                                            |
| 638 | c156990_g1_i1_len_249_path_1_0_248_4     | 4      | tsa family protein                                     | 83  | 4.89E-27 | 78.10% | 0.137  | IPR000866 (PFAM); IPR012336 (G3DSA:3.40.30.GENE3D); PTHR10681:SF101 (PANTHER); PTHR10681 (PANTHER); IPR012336 (SUPERFAMILY)                                                                                                                                                                                                                                                                                                                                                                                                         |
| 639 | c157041_g1_i1_len_371_path_349_0_370_1   | 27     | 14-3-3 protein                                         | 124 | 1.39E-58 | 85.90% | 0.103  | IPR000308 (PRINTS); IPR023410 (SMART); IPR023410 (PFAM); G3DSA:1.20.190.20 (GENE3D); IPR000308 (PANTHER); IPR023410 (SUPERFAMILY)                                                                                                                                                                                                                                                                                                                                                                                                   |
| 640 | c157058_g1_i1_len_474_path_1_0_473_3     | 6      | protein disulfide-isomerase a6-like                    | 158 | 9.49E-22 | 52.70% | 0.101  | IPR012336 (G3DSA:3.40.30.GENE3D); IPR013766 (PFAM); IPR012336 (G3DSA:3.40.30.GENE3D); PTHR18929 (PANTHER); IPR017937 (PROSITE_PATTERNS); IPR012336 (PROSITE_PROFILES); IPR012336 (SUPERFAMILY); IPR012336 (SUPERFAMILY)                                                                                                                                                                                                                                                                                                             |
| 641 | c15706_g1_i1_len_2510_path_2587_0_2509_0 | 543265 | hemocyanin subunit type 2 precursor                    | 837 | 0        | 73.10% | 0.332  | IPR013788 (PRINTS); IPR000896 (PFAM); IPR005203 (PFAM); IPR005204 (G3DSA:1.20.1370.GENE3D); IPR008922 (G3DSA:1.10.1280.GENE3D); IPR005204 (PFAM); IPR005203 (G3DSA:2.60.40.GENE3D); IPR013788 (PANTHER); IPR013788 (PROSITE_PATTERNS); IPR002227 (PROSITE_PATTERNS); IPR013788 (PROSITE_PATTERNS); CYTOPLASMIC_DOMAIN (PHOBIUS); TRANSMEMBRANE (PHOBIUS); NON_CYTOPLASMIC_DOMAIN (PHOBIUS); IPR005204 (SUPERFAMILY); IPR008922 (SUPERFAMILY); IPR014756 (SUPERFAMILY)                                                               |
| 642 | c157101_g1_i1_len_322_path_1_0_321_0     | 8      | enolase 2-like                                         | 108 | 4.26E-43 | 81.20% | 0.108  | IPR000941 (PRINTS); IPR020810 (PFAM); IPR029065 (G3DSA:3.20.20.GENE3D); IPR000941 (PANTHER); IPR029065 (SUPERFAMILY)                                                                                                                                                                                                                                                                                                                                                                                                                |
| 643 | c157129_g1_i1_len_717_path_695_0_716_3   | 46     | low-density lipoprotein receptor-related protein 2     | 239 | 1.87E-39 | 57.10% | 0.104  | IPR002172 (PRINTS); IPR002172 (SMART); IPR002172 (PFAM); IPR002172 (G3DSA:4.10.400.GENE3D); G3DSA:4.10.1220.10 (GENE3D); IPR002172 (G3DSA:4.10.400.GENE3D); PTHR10529 (PANTHER); IPR023415 (PROSITE_PATTERNS); IPR023415 (PROSITE_PATTERNS); IPR023415 (PROSITE_PATTERNS); IPR023415 (PROSITE_PATTERNS); IPR002172 (PROSITE_PROFILES); IPR002172 (PROSITE_PROFILES); IPR002172 (PROSITE_PROFILES); IPR002172 (PROSITE_PROFILES); IPR002172 (SUPERFAMILY); IPR002172 (SUPERFAMILY); IPR002172 (SUPERFAMILY); IPR002172 (SUPERFAMILY) |
| 644 | c157258_g1_i1_len_440_path_418_0_439_4   | 12     | gastrula zinc finger                                   | 147 | 3.61E-52 | 69.10% | 0.101  | IPR015880 (SMART); IPR013087 (G3DSA:3.30.160.GENE3D); PF13465 (PFAM); IPR013087 (G3DSA:3.30.160.GENE3D); IPR013087 (G3DSA:3.30.160.GENE3D); PTHR24409 (PANTHER); IPR007087 (PROSITE_PATTERNS); IPR007087 (PROSITE_PATTERNS); IPR007087 (PROSITE_PATTERNS); IPR007087 (PROSITE_PATTERNS); IPR007087 (PROSITE_PROFILES); IPR007087 (PROSITE_PROFILES); IPR007087 (PROSITE_PROFILES); IPR007087 (PROSITE_PROFILES); IPR007087 (PROSITE_PROFILES); SSF57667 (SUPERFAMILY); SSF57667 (SUPERFAMILY); SSF57667 (SUPERFAMILY)               |
| 645 | c157272_g1_i1_len_413_path_1_0_412_1     | 6      | zinc finger protein 705a-like isoform x1               | 138 | 1.03E-17 | 51.20% | 0.099  | IPR015880 (SMART); G3DSA:3.30.60.20 (GENE3D); IPR013087 (G3DSA:3.30.160.GENE3D); PF13465 (PFAM); PTHR24409:SF13 (PANTHER); PTHR24409 (PANTHER); IPR007087 (PROSITE_PATTERNS); IPR007087 (PROSITE_PATTERNS); IPR007087 (PROSITE_PROFILES); IPR007087 (PROSITE_PROFILES); SSF57667 (SUPERFAMILY); SSF57667 (SUPERFAMILY)                                                                                                                                                                                                              |
| 646 | c157401_g1_i1_len_269_path_1_0_268_3     | 4      | semaphorin-1a                                          | 90  | 3.17E-41 | 87.00% | 0.111  | IPR001627 (PFAM); IPR015943 (G3DSA:2.130.10.GENE3D); PTHR11036:SF66 (PANTHER); IPR027231 (PANTHER); IPR001627 (PROSITE_PROFILES); IPR001627 (SUPERFAMILY)                                                                                                                                                                                                                                                                                                                                                                           |
| 647 | c157484_g1_i1_len_260_path_1_0_259_0     | 5      | iron zinc purple acid phosphatase-like isoform x1      | 87  | 1.21E-32 | 75.80% | 0.099  | IPR015914 (G3DSA:2.60.40.GENE3D); PTHR22953:SF9 (PANTHER); PTHR22953 (PANTHER); IPR008963 (SUPERFAMILY)                                                                                                                                                                                                                                                                                                                                                                                                                             |

|     |                                                                    |    |                                                                     |     |           |        |        |                                                                                                                                                                                                                                                                                                                                                                                                                                  |
|-----|--------------------------------------------------------------------|----|---------------------------------------------------------------------|-----|-----------|--------|--------|----------------------------------------------------------------------------------------------------------------------------------------------------------------------------------------------------------------------------------------------------------------------------------------------------------------------------------------------------------------------------------------------------------------------------------|
| 648 | c157751_g1_i1_len_511_path_489_0_510_1                             | 8  | cell division protein kinase 5                                      | 170 | 9.75E-119 | 99.10% | 0.101  | IPR002290 (SMART); IPR000719 (PFAM); G3DSA:3.30.200.20 (GENE3D); G3DSA:1.10.510.10 (GENE3D); PTHR24056 (PANTHER); IPR008271 (PROSITE_PATTERNS); IPR000719 (PROSITE_PROFILES); IPR011009 (SUPERFAMILY)                                                                                                                                                                                                                            |
| 649 | c157968_g1_i1_len_511_path_489_0_510_1                             | 12 | tyrosine-protein phosphatase 69d                                    | 170 | 5.52E-82  | 84.80% | 0.102  | IPR000242 (PRINTS); IPR000242 (SMART); IPR029021 (G3DSA:3.90.190.GENE3D); IPR000242 (PFAM); PTHR19134:SF277 (PANTHER); PTHR19134 (PANTHER); IPR000242 (PROSITE_PROFILES); IPR029021 (SUPERFAMILY)                                                                                                                                                                                                                                |
| 650 | c158058_g1_i1_len_262_path_240_0_261_1                             | 6  | wd repeat-containing protein 33                                     | 87  | 8.03E-47  | 92.10% | 0.102  | IPR001680 (SMART); IPR001680 (PFAM); IPR015943 (G3DSA:2.130.10.GENE3D); PTHR22836 (PANTHER); IPR001680 (PROSITE_PROFILES); IPR017986 (PROSITE_PROFILES); IPR001680 (PROSITE_PROFILES); IPR017986 (SUPERFAMILY)                                                                                                                                                                                                                   |
| 651 | c158154_g1_i1_len_587_path_569_0_586_2                             | 20 | myostatin                                                           | 195 | 2.54E-76  | 84.70% | 0.464Y | IPR001839 (SMART); IPR001839 (PFAM); IPR029034 (G3DSA:2.10.90.GENE3D); IPR015615 (PANTHER); IPR015616 (PTHR11848:PANTHER); IPR017948 (PROSITE_PATTERNS); IPR001839 (PROSITE_PROFILES); SignalP-noTM (SIGNALP_EUK); IPR029034 (SUPERFAMILY)                                                                                                                                                                                       |
| 652 | c158168_g1_i1_len_260_path_238_0_259_0                             | 4  | low quality protein: matrilin-4                                     | 87  | 1.28E-06  | 61.33% | 0.104  | IPR001881 (SMART); PF14670 (PFAM); G3DSA:2.10.25.10 (GENE3D); IPR013032 (PROSITE_PATTERNS); SSF57196 (SUPERFAMILY)                                                                                                                                                                                                                                                                                                               |
| 653 | c158233_g1_i1_len_201_path_179_0_200_1                             | 1  | ---NA---                                                            | 67  |           |        | 0.411Y | G3DSA:2.40.10.10 (GENE3D); IPR001254 (PFAM); IPR009003 (SUPERFAMILY)                                                                                                                                                                                                                                                                                                                                                             |
| 654 | c158245_g1_i1_len_386_path_1_0_385_5                               | 3  | cyclin-dependent kinase-like partial                                | 128 | 5.63E-40  | 90.20% | 0.125  | IPR000719 (PFAM); G3DSA:3.30.200.20 (GENE3D); G3DSA:3.30.200.20 (GENE3D); PTHR24056:SF153 (PANTHER); PTHR24056 (PANTHER); IPR000719 (PROSITE_PROFILES); IPR011009 (SUPERFAMILY)                                                                                                                                                                                                                                                  |
| 655 | c158358_g1_i1_len_688_path_666_0_687_0                             | 18 | adam 17-like protease                                               | 230 | 2.34E-67  | 70.20% | 0.214  | IPR002870 (PFAM); PTHR11905:SF121 (PANTHER); PTHR11905 (PANTHER); CYTOPLASMIC_DOMAIN (PHOBIUS); TRANSMEMBRANE (PHOBIUS); NON_CYTOPLASMIC_DOMAIN (PHOBIUS)                                                                                                                                                                                                                                                                        |
| 656 | c158504_g1_i1_len_402_path_1_0_401_0                               | 5  | proclotting enzyme                                                  | 134 | 2.16E-08  | 77.30% | 0.184  | IPR001254 (PFAM); G3DSA:2.40.10.10 (GENE3D); PTHR24268 (PANTHER); IPR009003 (SUPERFAMILY)                                                                                                                                                                                                                                                                                                                                        |
| 657 | c158730_g1_i1_len_638_path_616_0_637_2                             | 21 | venom protease-like                                                 | 212 | 3.12E-54  | 61.40% | 0.147  | IPR001314 (PRINTS); IPR001254 (SMART); G3DSA:2.40.10.10 (GENE3D); G3DSA:2.40.10.10 (GENE3D); IPR001254 (PFAM); G3DSA:2.40.10.10 (GENE3D); PTHR24268 (PANTHER); IPR018114 (PROSITE_PATTERNS); IPR018114 (PROSITE_PATTERNS); IPR001254 (PROSITE_PROFILES); IPR009003 (SUPERFAMILY)                                                                                                                                                 |
| 658 | c158838_g1_i1_len_373_path_1_0_372_1                               | 9  | microtubule-associated serine threonine-protein kinase 3 isoform x1 | 124 | 4.66E-78  | 95.50% | 0.126  | IPR002290 (SMART); IPR000719 (PFAM); G3DSA:1.10.510.10 (GENE3D); PTHR24356 (PANTHER); PTHR24356:SF36 (PANTHER); NON_CYTOPLASMIC_DOMAIN (PHOBIUS); TRANSMEMBRANE (PHOBIUS); CYTOPLASMIC_DOMAIN (PHOBIUS); IPR000719 (PROSITE_PROFILES); IPR011009 (SUPERFAMILY)                                                                                                                                                                   |
| 659 | c15885_g1_i1_len_1404_path_333_0_859_11_92_860_964_332_965_1403_4  | 70 | serine proteinase                                                   | 468 | 2.79E-71  | 56.70% | 0.278  | IPR001314 (PRINTS); IPR001254 (SMART); G3DSA:2.40.10.10 (GENE3D); G3DSA:2.40.10.10 (GENE3D); IPR001254 (PFAM); G3DSA:2.40.10.10 (GENE3D); PTHR24268 (PANTHER); PTHR24268:SF81 (PANTHER); IPR018114 (PROSITE_PATTERNS); TRANSMEMBRANE (PHOBIUS); NON_CYTOPLASMIC_DOMAIN (PHOBIUS); NON_CYTOPLASMIC_DOMAIN (PHOBIUS); CYTOPLASMIC_DOMAIN (PHOBIUS); TRANSMEMBRANE (PHOBIUS); IPR001254 (PROSITE_PROFILES); IPR009003 (SUPERFAMILY) |
| 660 | c15885_g1_i2_len_1440_path_333_0_859_19_1_860_1000_332_1001_1439_4 | 76 | venom protease-like                                                 | 480 | 7.01E-71  | 55.40% | 0.278  | IPR001314 (PRINTS); IPR001254 (SMART); G3DSA:2.40.10.10 (GENE3D); G3DSA:2.40.10.10 (GENE3D); IPR001254 (PFAM); G3DSA:2.40.10.10 (GENE3D); PTHR24265 (PANTHER); IPR018114 (PROSITE_PATTERNS); NON_CYTOPLASMIC_DOMAIN (PHOBIUS); TRANSMEMBRANE (PHOBIUS); TRANSMEMBRANE (PHOBIUS); NON_CYTOPLASMIC_DOMAIN (PHOBIUS); CYTOPLASMIC_DOMAIN (PHOBIUS); IPR001254 (PROSITE_PROFILES); IPR009003 (SUPERFAMILY)                           |
| 661 | c158907_g1_i1_len_313_path_1_0_312_0                               | 4  | endonuclease mitochondrial                                          | 105 | 6.06E-52  | 84.10% | 0.1    | IPR020821 (SMART); IPR020821 (G3DSA:3.40.570.GENE3D); IPR001604 (PFAM); PTHR13966 (PANTHER); SSF54060 (SUPERFAMILY)                                                                                                                                                                                                                                                                                                              |
| 662 | c158913_g1_i1_len_278_path_1_0_277_4                               | 8  | hemacentin-1-like protein                                           | 93  | 1.12E-25  | 66.00% | 0.11   | G3DSA:2.10.25.10 (GENE3D); G3DSA:2.10.25.10 (GENE3D); IPR026823 (PFAM); PTHR24034:SF33 (PANTHER); PTHR24034 (PANTHER); IPR013032 (PROSITE_PATTERNS); IPR018097 (PROSITE_PATTERNS); SSF57196 (SUPERFAMILY)                                                                                                                                                                                                                        |
| 663 | c158919_g1_i1_len_332_path_1_0_331_4                               | 4  | fat-like cadherin-related tumor suppressor-like protein             | 111 | 1.90E-44  | 82.50% | 0.142  | IPR002126 (PRINTS); IPR002126 (SMART); IPR002126 (PFAM); IPR002126 (G3DSA:2.60.40.GENE3D); PTHR24026:SF39 (PANTHER); PTHR24026 (PANTHER); IPR002126 (PROSITE_PROFILES); IPR015919 (SUPERFAMILY)                                                                                                                                                                                                                                  |
| 664 | c15893_g2_i1_len_138_path_312_0_137_1                              | 0  | t-cell immunomodulatory protein                                     | 46  | 5.99E-06  | 67.00% | 0.105  | no IPS match                                                                                                                                                                                                                                                                                                                                                                                                                     |

|     |                                        |    |                                                              |     |          |        |       |                                                                                                                                                                                                                                                                                                                                                                                                                                                                                                                                                                   |
|-----|----------------------------------------|----|--------------------------------------------------------------|-----|----------|--------|-------|-------------------------------------------------------------------------------------------------------------------------------------------------------------------------------------------------------------------------------------------------------------------------------------------------------------------------------------------------------------------------------------------------------------------------------------------------------------------------------------------------------------------------------------------------------------------|
| 665 | c158946_g1_i1_len_243_path_221_0_242_3 | 7  | neutral endopeptidase                                        | 81  | 1.02E-23 | 72.00% | 0.113 | IPR018497 (PRINTS); IPR024079 (G3DSA:3.40.390.GENE3D); IPR018497 (PFAM); PTHR11733:SF113 (PANTHER); IPR000718 (PANTHER); NON_CYTOPLASMIC_DOMAIN (PHOBIUS); CYTOPLASMIC_DOMAIN (PHOBIUS); TRANSMEMBRANE (PHOBIUS); SSF55486 (SUPERFAMILY); TMhelix (TMHMM)                                                                                                                                                                                                                                                                                                         |
| 666 | c159006_g1_i1_len_523_path_1_0_522_2   | 8  | serine threonine-protein kinase partial                      | 174 | 5.49E-81 | 83.10% | 0.113 | IPR001245 (PFAM); G3DSA:3.30.200.20 (GENE3D); G3DSA:1.10.510.10 (GENE3D); PTHR23257:SF63 (PANTHER); PTHR23257 (PANTHER); IPR017441 (PROSITE_PATTERNS); IPR000719 (PROSITE_PROFILES); IPR011009 (SUPERFAMILY)                                                                                                                                                                                                                                                                                                                                                      |
| 667 | c159461_g1_i1_len_519_path_1_0_518_2   | 11 | gastrula zinc finger                                         | 173 | 1.71E-35 | 59.50% | 0.099 | IPR015880 (SMART); IPR007087 (PFAM); IPR013087 (G3DSA:3.30.160.GENE3D); IPR013087 (G3DSA:3.30.160.GENE3D); IPR013087 (G3DSA:3.30.160.GENE3D); PF13465 (PFAM); PTHR24409:SF13 (PANTHER); PTHR24409 (PANTHER); IPR007087 (PROSITE_PATTERNS); IPR007087 (PROSITE_PATTERNS); IPR007087 (PROSITE_PATTERNS); IPR007087 (PROSITE_PATTERNS); IPR007087 (PROSITE_PROFILES); IPR007087 (PROSITE_PROFILES); IPR007087 (PROSITE_PROFILES); IPR007087 (PROSITE_PROFILES); IPR007087 (PROSITE_PROFILES); SSF57667 (SUPERFAMILY); SSF57667 (SUPERFAMILY); SSF57667 (SUPERFAMILY) |
| 668 | c159700_g1_i1_len_150_path_128_0_149_3 | 3  | blastula protease 10-like                                    | 50  | 2.99E-11 | 70.80% | 0.106 | IPR024079 (G3DSA:3.40.390.GENE3D); IPR001506 (PFAM); PTHR10127 (PANTHER); PTHR10127:SF580 (PANTHER); SSF55486 (SUPERFAMILY)                                                                                                                                                                                                                                                                                                                                                                                                                                       |
| 669 | c159989_g1_i1_len_422_path_1_0_421_2   | 8  | fibrillin-2 isoform x3                                       | 140 | 1.82E-49 | 73.90% | 0.099 | IPR000742 (SMART); IPR001881 (SMART); G3DSA:2.10.25.10 (GENE3D); IPR026823 (PFAM); G3DSA:2.10.25.10 (GENE3D); G3DSA:2.10.25.10 (GENE3D); IPR001881 (PFAM); G3DSA:2.10.25.10 (GENE3D); PF14670 (PFAM); PTHR24034 (PANTHER); IPR018097 (PROSITE_PATTERNS); IPR000152 (PROSITE_PATTERNS); IPR000152 (PROSITE_PATTERNS); IPR013032 (PROSITE_PATTERNS); IPR018097 (PROSITE_PATTERNS); IPR000742 (PROSITE_PROFILES); IPR000742 (PROSITE_PROFILES); IPR009030 (SUPERFAMILY)                                                                                              |
| 670 | c160259_g1_i1_len_746_path_1_0_745_3   | 15 | ras-responsive element-binding protein 1                     | 249 | 1.79E-55 | 57.60% | 0.1   | IPR015880 (SMART); PF13465 (PFAM); IPR013087 (G3DSA:3.30.160.GENE3D); IPR013087 (G3DSA:3.30.160.GENE3D); PF13894 (PFAM); PTHR23233:SF42 (PANTHER); PTHR23233 (PANTHER); IPR007087 (PROSITE_PATTERNS); IPR007087 (PROSITE_PATTERNS); IPR007087 (PROSITE_PATTERNS); IPR007087 (PROSITE_PROFILES); IPR007087 (PROSITE_PROFILES); IPR007087 (PROSITE_PROFILES); SSF57667 (SUPERFAMILY); SSF57667 (SUPERFAMILY)                                                                                                                                                        |
| 671 | c160268_g1_i1_len_482_path_1_0_481_3   | 14 | wd sam and u-box domain-containing protein 1-like isoform x2 | 161 | 5.25E-35 | 63.60% | 0.119 | IPR020472 (PRINTS); IPR001680 (SMART); IPR001680 (PFAM); IPR015943 (G3DSA:2.130.10.GENE3D); PTHR22847 (PANTHER); IPR019775 (PROSITE_PATTERNS); IPR019775 (PROSITE_PATTERNS); IPR001680 (PROSITE_PROFILES); IPR017986 (PROSITE_PROFILES); IPR001680 (PROSITE_PROFILES); IPR017986 (SUPERFAMILY)                                                                                                                                                                                                                                                                    |
| 672 | c160415_g1_i1_len_357_path_1_0_356_3   | 8  | zinc finger protein 160-like                                 | 119 | 1.09E-24 | 64.60% | 0.106 | IPR015880 (SMART); IPR013087 (G3DSA:3.30.160.GENE3D); IPR013087 (G3DSA:3.30.160.GENE3D); IPR007087 (PFAM); PF13465 (PFAM); IPR013087 (G3DSA:3.30.160.GENE3D); IPR013087 (G3DSA:3.30.160.GENE3D); PTHR24409 (PANTHER); PTHR24409:SF14 (PANTHER); IPR007087 (PROSITE_PATTERNS); IPR007087 (PROSITE_PATTERNS); IPR007087 (PROSITE_PROFILES); IPR007087 (PROSITE_PROFILES); SSF57667 (SUPERFAMILY); SSF57667 (SUPERFAMILY)                                                                                                                                            |
| 673 | c160718_g1_i1_len_152_path_1_0_151_1   | 20 | cathepsin I                                                  | 51  | 1.99E-20 | 92.20% | 0.099 | IPR000668 (PFAM); G3DSA:3.90.70.10 (GENE3D); PTHR12411:SF57 (PANTHER); IPR013128 (PANTHER); SSF54001 (SUPERFAMILY)                                                                                                                                                                                                                                                                                                                                                                                                                                                |
| 674 | c160855_g1_i1_len_139_path_1_0_138_4   | 0  | pdz domain-containing protein 2                              | 46  | 7.72E-17 | 88.20% | 0.136 | IPR001478 (PFAM); IPR001478 (G3DSA:2.30.42.GENE3D); PTHR19964 (PANTHER); PTHR19964:SF22 (PANTHER); IPR001478 (PROSITE_PROFILES); IPR001478 (SUPERFAMILY)                                                                                                                                                                                                                                                                                                                                                                                                          |
| 675 | c161216_g1_i1_len_276_path_1_0_275_4   | 4  | carbonyl reductase                                           | 92  | 7.46E-33 | 79.60% | 0.1   | IPR002347 (PRINTS); IPR016040 (G3DSA:3.40.50.GENE3D); IPR002198 (PFAM); PTHR24322 (PANTHER); PTHR24322:SF58 (PANTHER); SSF51735 (SUPERFAMILY)                                                                                                                                                                                                                                                                                                                                                                                                                     |
| 676 | c161385_g1_i1_len_542_path_1_0_541_2   | 21 | gilt-like protein                                            | 180 | 1.40E-30 | 63.50% | 0.133 | IPR004911 (PFAM); PTHR13234:SF8 (PANTHER); IPR004911 (PANTHER); TRANSMEMBRANE (PHOBIUS); CYTOPLASMIC_DOMAIN (PHOBIUS); NON_CYTOPLASMIC_DOMAIN (PHOBIUS); TMhelix (TMHMM)                                                                                                                                                                                                                                                                                                                                                                                          |
| 677 | c161429_g1_i1_len_341_path_319_0_340_0 | 4  | transposase                                                  | 114 | 2.11E-12 | 53.00% | 0.108 | no IPS match                                                                                                                                                                                                                                                                                                                                                                                                                                                                                                                                                      |

|     |                                                   |     |                                                                                   |     |           |        |        |                                                                                                                                                                                                                                                                                                                                                                                                                                                            |
|-----|---------------------------------------------------|-----|-----------------------------------------------------------------------------------|-----|-----------|--------|--------|------------------------------------------------------------------------------------------------------------------------------------------------------------------------------------------------------------------------------------------------------------------------------------------------------------------------------------------------------------------------------------------------------------------------------------------------------------|
| 678 | c1616_g1_i1_len_1652_path_1_0_1651_3              | 224 | di-n-acetylchitobiase                                                             | 551 | 2.82E-114 | 63.00% | 0.881Y | IPR011583 (SMART); IPR001223 (PFAM); IPR013781 (G3DSA:3.20.20.GENE3D); PTHR11177:SF146 (PANTHER); PTHR11177 (PANTHER); NON_CYTOPLASMIC_DOMAIN (PHOBIUS); SIGNAL_PEPTIDE (PHOBIUS); SIGNAL_PEPTIDE_C_REGION (PHOBIUS); SIGNAL_PEPTIDE_N_REGION (PHOBIUS); SIGNAL_PEPTIDE_H_REGION (PHOBIUS); SignalP-noTM (SIGNALP_EUK); IPR017853 (SUPERFAMILY); TMhelix (TMHMM)                                                                                           |
| 679 | c1618_g1_i1_len_1780_path_1_0_1779_4              | 187 | secreted frizzled-related protein 5                                               | 593 | 2.47E-116 | 63.80% | 0.105  | Coil (COILS); IPR020067 (SMART); IPR018933 (PFAM); IPR020067 (G3DSA:1.10.2000.GENE3D); IPR020067 (PFAM); IPR015526 (PANTHER); PTHR11309:SF80 (PANTHER); NON_CYTOPLASMIC_DOMAIN (PHOBIUS); CYTOPLASMIC_DOMAIN (PHOBIUS); TRANSMEMBRANE (PHOBIUS); IPR020067 (PROSITE_PROFILES); IPR001134 (PROSITE_PROFILES); IPR008993 (SUPERFAMILY); IPR020067 (SUPERFAMILY); TMhelix (TMHMM)                                                                             |
| 680 | c162416_g1_i1_len_283_path_261_0_282_1            | 4   | nadph--cytochrome p450 reductase                                                  | 94  | 7.36E-56  | 96.50% | 0.103  | IPR002401 (PRINTS); IPR001128 (G3DSA:1.10.630.GENE3D); IPR001128 (PFAM); PTHR24305:SF21 (PANTHER); PTHR24305 (PANTHER); IPR001128 (SUPERFAMILY)                                                                                                                                                                                                                                                                                                            |
| 681 | c162748_g1_i1_len_472_path_1_0_471_3              | 7   | thrombospondin type-1 domain-containing protein 4-like                            | 158 | 7.49E-16  | 60.40% | 0.112  | IPR000884 (SUPERFAMILY)                                                                                                                                                                                                                                                                                                                                                                                                                                    |
| 682 | c162826_g1_i1_len_277_path_1_0_276_0              | 2   | collagen alpha-1 chain                                                            | 93  | 3.79E-12  | 61.50% | 0.1    | IPR008160 (PFAM); PTHR24023 (PANTHER); PTHR24023:SF372 (PANTHER)                                                                                                                                                                                                                                                                                                                                                                                           |
| 683 | c162898_g1_i1_len_280_path_258_0_279_0            | 4   | nad h-hydrate epimerase isoform x1                                                | 94  | 1.00E-41  | 82.20% | 0.164  | IPR004443 (G3DSA:3.40.50.GENE3D); IPR004443 (PFAM); PTHR13232:SF11 (PANTHER); PTHR13232 (PANTHER); IPR004443 (PROSITE_PROFILES); IPR004443 (SUPERFAMILY)                                                                                                                                                                                                                                                                                                   |
| 684 | c163161_g1_i1_len_257_path_235_0_256_2            | 4   | moxd1 homolog 1-like                                                              | 85  | 1.97E-06  | 68.00% | 0.155  | PF03712 (PFAM); IPR014784 (G3DSA:2.60.120.GENE3D); IPR008977 (SUPERFAMILY)                                                                                                                                                                                                                                                                                                                                                                                 |
| 685 | c1636_g1_i1_len_540_path_1_0_539_3                | 10  | tyrosine-protein phosphatase non-receptor type 9 isoform x6                       | 180 | 3.87E-77  | 81.70% | 0.106  | IPR000242 (PRINTS); IPR000242 (SMART); IPR029021 (G3DSA:3.90.190.GENE3D); IPR000242 (PFAM); PTHR19134:SF232 (PANTHER); PTHR19134 (PANTHER); IPR000242 (PROSITE_PROFILES); IPR029021 (SUPERFAMILY)                                                                                                                                                                                                                                                          |
| 686 | c164763_g1_i1_len_392_path_1_0_391_0              | 17  | maguk p55 subfamily member 5                                                      | 131 | 4.98E-72  | 92.00% | 0.107  | Coil (COILS); Coil (COILS); IPR008145 (SMART); IPR027417 (G3DSA:3.40.50.GENE3D); IPR008145 (PFAM); PTHR23122 (PANTHER); PTHR23122:SF32 (PANTHER); IPR008144 (PROSITE_PROFILES); IPR027417 (SUPERFAMILY)                                                                                                                                                                                                                                                    |
| 687 | c164825_g1_i1_len_436_path_414_0_435_2            | 6   | von willebrand factor type egf and pentraxin domain-containing protein 1- partial | 145 | 3.07E-69  | 83.80% | 0.119  | IPR003410 (PFAM); G3DSA:2.10.70.10 (GENE3D); PTHR24049:SF6 (PANTHER); PTHR24049 (PANTHER); IPR003410 (PROSITE_PROFILES)                                                                                                                                                                                                                                                                                                                                    |
| 688 | c165078_g1_i1_len_370_path_1_0_369_2              | 10  | #NAME?                                                                            | 123 | 6.61E-25  | 83.40% | 0.177  | Coil (COILS); IPR001623 (PRINTS); IPR001623 (SMART); IPR001623 (PFAM); IPR001623 (G3DSA:1.10.287.GENE3D); PTHR24077 (PANTHER); NON_CYTOPLASMIC_DOMAIN (PHOBIUS); TRANSMEMBRANE (PHOBIUS); CYTOPLASMIC_DOMAIN (PHOBIUS); IPR001623 (PROSITE_PROFILES); IPR001623 (SUPERFAMILY)                                                                                                                                                                              |
| 689 | c165124_g1_i1_len_268_path_246_0_267_4            | 4   | zinc finger protein 567 isoform x2                                                | 89  | 1.44E-46  | 87.50% | 0.107  | IPR015880 (SMART); IPR013087 (G3DSA:3.30.160.GENE3D); PF13465 (PFAM); PTHR23228 (PANTHER); PTHR23228:SF14 (PANTHER); IPR007087 (PROSITE_PATTERNS); IPR007087 (PROSITE_PATTERNS); IPR007087 (PROSITE_PROFILES); IPR007087 (PROSITE_PROFILES); IPR007087 (PROSITE_PROFILES); SSF57667 (SUPERFAMILY); SSF57667 (SUPERFAMILY)                                                                                                                                  |
| 690 | c16540_g1_i1_len_2213_path_43_0_173_21_174_2212_2 | 183 | extracellular serine threonine protein kinase fam20c isoform x1                   | 737 | 0         | 71.70% | 0.15   | IPR009581 (PFAM); PTHR12450:SF8 (PANTHER); IPR024869 (PANTHER); TRANSMEMBRANE (PHOBIUS); NON_CYTOPLASMIC_DOMAIN (PHOBIUS); CYTOPLASMIC_DOMAIN (PHOBIUS); CYTOPLASMIC_DOMAIN (PHOBIUS); TRANSMEMBRANE (PHOBIUS); TRANSMEMBRANE (PHOBIUS); NON_CYTOPLASMIC_DOMAIN (PHOBIUS); TMhelix (TMHMM); TMhelix (TMHMM)                                                                                                                                                |
| 691 | c16589_g1_i1_len_1362_path_1390_0_1361_5          | 58  | isoform b                                                                         | 454 | 2.12E-107 | 64.90% | 0.101  | IPR015812 (PRINTS); G3DSA:2.10.25.10 (GENE3D); G3DSA:2.10.25.10 (GENE3D); IPR014836 (G3DSA:1.20.5.GENE3D); IPR014836 (PFAM); G3DSA:1.20.5.100 (GENE3D); IPR015812 (PANTHER); PTHR10082:SF16 (PANTHER); IPR015812 (PROSITE_PATTERNS); IPR015812 (PROSITE_PATTERNS); IPR015812 (PROSITE_PATTERNS); CYTOPLASMIC_DOMAIN (PHOBIUS); NON_CYTOPLASMIC_DOMAIN (PHOBIUS); TRANSMEMBRANE (PHOBIUS); SSF57196 (SUPERFAMILY); IPR012896 (SUPERFAMILY); TMhelix (TMHMM) |
| 692 | c166729_g1_i1_len_248_path_1_0_247_0              | 6   | carboxypeptidase n subunit 2                                                      | 83  | 1.19E-11  | 62.50% | 0.106  | IPR001611 (PFAM); G3DSA:3.80.10.10 (GENE3D); PTHR24365 (PANTHER); SSF52058 (SUPERFAMILY)                                                                                                                                                                                                                                                                                                                                                                   |
| 693 | c166983_g1_i1_len_253_path_231_0_252_5            | 4   | chaperone protein                                                                 | 84  | 2.88E-25  | 86.10% | 0.154  | IPR013126 (PRINTS); IPR013126 (PFAM); G3DSA:3.30.420.40 (GENE3D); PTHR19375 (PANTHER); PTHR19375:SF173 (PANTHER); IPR018181 (PROSITE_PATTERNS); SSF53067 (SUPERFAMILY)                                                                                                                                                                                                                                                                                     |

|     |                                          |     |                                                                |     |           |        |         |                                                                                                                                                                                                                                                                                                                                                                                                                                                                                                                                                                                                                                                                                                                                    |
|-----|------------------------------------------|-----|----------------------------------------------------------------|-----|-----------|--------|---------|------------------------------------------------------------------------------------------------------------------------------------------------------------------------------------------------------------------------------------------------------------------------------------------------------------------------------------------------------------------------------------------------------------------------------------------------------------------------------------------------------------------------------------------------------------------------------------------------------------------------------------------------------------------------------------------------------------------------------------|
| 694 | c16699_g1_i1_len_2273_path_2301_0_2272_2 | 297 | serine threonine-protein kinase grp-like                       | 757 | 0         | 74.50% | 0.173   | IPR002290 (SMART); G3DSA:3.30.200.20 (GENE3D); G3DSA:1.10.510.10 (GENE3D); IPR000719 (PFAM); PTHR24344 (PANTHER); IPR008271 (PROSITE_PATTERNS); IPR017441 (PROSITE_PATTERNS); TRANSMEMBRANE (PHOBIUS); CYTOPLASMIC_DOMAIN (PHOBIUS); NON_CYTOPLASMIC_DOMAIN (PHOBIUS); NON_CYTOPLASMIC_DOMAIN (PHOBIUS); TRANSMEMBRANE (PHOBIUS); TRANSMEMBRANE (PHOBIUS); CYTOPLASMIC_DOMAIN (PHOBIUS); IPR000719 (PROSITE_PROFILES); IPR011009 (SUPERFAMILY); TMhelix (TMHMM); TMhelix (TMHMM); TMhelix (TMHMM)                                                                                                                                                                                                                                  |
| 695 | c167229_g1_i1_len_380_path_358_0_379_4   | 5   | kinase d-interacting substrate of 220 kda isoform x7           | 127 | 1.34E-63  | 87.70% | 0.105   | IPR002110 (SMART); IPR020683 (G3DSA:1.25.40.GENE3D); IPR020683 (PFAM); PTHR24139 (PANTHER); PTHR24139:SF10 (PANTHER); IPR002110 (PROSITE_PROFILES); IPR002110 (PROSITE_PROFILES); IPR002110 (PROSITE_PROFILES); IPR020683 (PROSITE_PROFILES); IPR020683 (SUPERFAMILY)                                                                                                                                                                                                                                                                                                                                                                                                                                                              |
| 696 | c16754_g1_i1_len_2135_path_2163_0_2134_4 | 146 | leucine rich repeat protein                                    | 712 | 5.73E-36  | 53.10% | 0.505 Y | PR00019 (PRINTS); IPR003591 (SMART); SM00364 (SMART); SM00365 (SMART); G3DSA:3.80.10.10 (GENE3D); G3DSA:3.80.10.10 (GENE3D); IPR001611 (PFAM); IPR001611 (PFAM); G3DSA:3.80.10.10 (GENE3D); PTHR24365 (PANTHER); CYTOPLASMIC_DOMAIN (PHOBIUS); TRANSMEMBRANE (PHOBIUS); NON_CYTOPLASMIC_DOMAIN (PHOBIUS); IPR001611 (PROSITE_PROFILES); SignalP-noTM (SIGNALP_EUK); SSF52058 (SUPERFAMILY); SSF52058 (SUPERFAMILY); TMhelix (TMHMM); TMhelix (TMHMM) |
| 697 | c167603_g1_i1_len_189_path_1_0_188_3     | 0   | zinc finger protein 717-like                                   | 63  | 8.92E-11  | 66.20% | 0.099   | IPR015880 (SMART); IPR013087 (G3DSA:3.30.160.GENE3D); PF13465 (PFAM); PTHR24409 (PANTHER); PTHR24409:SF13 (PANTHER); IPR007087 (PROSITE_PATTERNS); IPR007087 (PROSITE_PROFILES); SSF57667 (SUPERFAMILY)                                                                                                                                                                                                                                                                                                                                                                                                                                                                                                                            |
| 698 | c169380_g1_i1_len_278_path_256_0_277_1   | 2   | vitellogenin-1-like isoform x2                                 | 93  | 1.10E-09  | 56.75% | 0.311   | IPR001747 (PFAM); IPR015816 (G3DSA:2.30.230.GENE3D); IPR015819 (SUPERFAMILY)                                                                                                                                                                                                                                                                                                                                                                                                                                                                                                                                                                                                                                                       |
| 699 | c170238_g1_i1_len_890_path_1_0_889_2     | 22  | variable lymphocyte receptor a                                 | 296 | 1.01E-09  | 51.00% | 0.114   | SM00364 (SMART); IPR003591 (SMART); IPR001611 (PFAM); G3DSA:3.80.10.10 (GENE3D); IPR001611 (PFAM); G3DSA:3.80.10.10 (GENE3D); PTHR24365 (PANTHER); TRANSMEMBRANE (PHOBIUS); CYTOPLASMIC_DOMAIN (PHOBIUS); NON_CYTOPLASMIC_DOMAIN (PHOBIUS); IPR001611 (PROSITE_PROFILES); SSF52058 (SUPERFAMILY); TMhelix (TMHMM)                                                                                                                                                                                                                              |
| 700 | c170248_g1_i1_len_1471_path_1_0_1470_4   | 84  | transducin beta-like protein 3                                 | 490 | 6.78E-107 | 76.10% | 0.209   | Coil (COILS); Coil (COILS); IPR001680 (SMART); IPR001680 (PFAM); IPR015943 (G3DSA:2.130.10.GENE3D); IPR013934 (PFAM); PTHR19854 (PANTHER); PTHR19854:SF15 (PANTHER); IPR001680 (PROSITE_PROFILES); IPR001680 (PROSITE_PROFILES); IPR017986 (PROSITE_PROFILES); IPR001680 (PROSITE_PROFILES); IPR017986 (SUPERFAMILY)                                                                                                                                                                                                                                                                                                                                                                                                               |
| 701 | c170250_g1_i1_len_1648_path_1_0_1647_2   | 941 | ras-related protein rab-10                                     | 549 | 3.99E-116 | 92.90% | 0.173   | IPR001806 (PRINTS); IPR003579 (SMART); IPR003578 (SMART); IPR002041 (SMART); IPR024156 (SMART); IPR020849 (SMART); IPR001806 (PFAM); IPR005225 (TIGRFAM); IPR027417 (G3DSA:3.40.50.GENE3D); PTHR24073:SF456 (PANTHER); PTHR24073 (PANTHER); NON_CYTOPLASMIC_DOMAIN (PHOBIUS); TRANSMEMBRANE (PHOBIUS); CYTOPLASMIC_DOMAIN (PHOBIUS); PS51419 (PROSITE_PROFILES); IPR027417 (SUPERFAMILY)                                                                                                                                                                                                                                                                                                                                           |
| 702 | c170269_g1_i1_len_693_path_671_0_692_5   | 36  | vitellogenic-like precursor                                    | 231 | 6.80E-67  | 67.00% | 0.16    | IPR001563 (PRINTS); IPR001563 (PFAM); IPR029058 (G3DSA:3.40.50.GENE3D); IPR001563 (PANTHER); IPR029058 (SUPERFAMILY)                                                                                                                                                                                                                                                                                                                                                                                                                                                                                                                                                                                                               |
| 703 | c170278_g1_i1_len_1317_path_1_0_1316_1   | 56  | dual specificity mitogen-activated protein kinase kinase dsor1 | 439 | 0         | 85.60% | 0.104   | IPR002290 (SMART); G3DSA:1.10.510.10 (GENE3D); G3DSA:3.30.200.20 (GENE3D); IPR000719 (PFAM); PTHR24360:SF15 (PANTHER); PTHR24360 (PANTHER); IPR008271 (PROSITE_PATTERNS); IPR017441 (PROSITE_PATTERNS); IPR000719 (PROSITE_PROFILES); IPR011009 (SUPERFAMILY)                                                                                                                                                                                                                                                                                                                                                                                                                                                                      |
| 704 | c170303_g1_i1_len_467_path_1_0_466_3     | 7   | fras1-related extracellular matrix protein 1-like              | 156 | 2.15E-07  | 57.00% | 0.126   | SSF141072 (SUPERFAMILY)                                                                                                                                                                                                                                                                                                                                                                                                                                                                                                                                                                                                                                                                                                            |



[illegible]

|     |                                                                     |     |                                                               |     |           |        |         |                                                                                                                                                                                                                                                                                                                                                                                                                                                                                                                                                                                                                                                                                                  |
|-----|---------------------------------------------------------------------|-----|---------------------------------------------------------------|-----|-----------|--------|---------|--------------------------------------------------------------------------------------------------------------------------------------------------------------------------------------------------------------------------------------------------------------------------------------------------------------------------------------------------------------------------------------------------------------------------------------------------------------------------------------------------------------------------------------------------------------------------------------------------------------------------------------------------------------------------------------------------|
| 716 | c170789_g1_i1_len_1683_path_987_0_288_1_276_289_985_1276_986_1682_4 | 128 | protein phosphatase 1 regulatory subunit 16a                  | 561 | 8.47E-61  | 60.30% | 0.196   | Coil (COILS); IPR002110 (SMART); IPR020683 (G3DSA:1.25.40.GENE3D); IPR020683 (PFAM); PTHR24186 (PANTHER); CYTOPLASMIC_DOMAIN (PHOBIUS); NON_CYTOPLASMIC_DOMAIN (PHOBIUS); TRANSMEMBRANE (PHOBIUS); IPR002110 (PROSITE_PROFILES); IPR002110 (PROSITE_PROFILES); IPR020683 (PROSITE_PROFILES); IPR020683 (SUPERFAMILY)                                                                                                                                                                                                                                                                                                                                                                             |
| 717 | c170826_g1_i1_len_522_path_500_0_521_4                              | 10  | fat-like cadherin-related tumor suppressor homolog            | 174 | 1.87E-66  | 73.30% | 0.128   | IPR002126 (PRINTS); IPR002126 (SMART); IPR002126 (PFAM); IPR002126 (G3DSA:2.60.40.GENE3D); PTHR24027 (PANTHER); PTHR24027:SF260 (PANTHER); IPR020894 (PROSITE_PATTERNS); IPR020894 (PROSITE_PATTERNS); IPR002126 (PROSITE_PROFILES); IPR002126 (PROSITE_PROFILES); IPR015919 (SUPERFAMILY); IPR015919 (SUPERFAMILY)                                                                                                                                                                                                                                                                                                                                                                              |
| 718 | c170831_g1_i1_len_455_path_1_0_454_5                                | 14  | glutamyl aminopeptidase                                       | 151 | 5.99E-14  | 53.40% | 0.164   | IPR024571 (PFAM); PTHR11533:SF165 (PANTHER); IPR001930 (PANTHER) IPR015880 (SMART); IPR013087 (G3DSA:3.30.160.GENE3D); IPR007087 (PFAM); PF13912 (PFAM); IPR013087 (G3DSA:3.30.160.GENE3D); PF13894 (PFAM); IPR013087 (G3DSA:3.30.160.GENE3D); PF13465 (PFAM); PTHR24409:SF14 (PANTHER); PTHR24409 (PANTHER); IPR007087 (PROSITE_PATTERNS); IPR007087 (PROSITE_PATTERNS); IPR007087 (PROSITE_PATTERNS); IPR007087 (PROSITE_PATTERNS); IPR007087 (PROSITE_PROFILES); IPR007087 (PROSITE_PROFILES); IPR007087 (PROSITE_PROFILES); IPR007087 (PROSITE_PROFILES); IPR007087 (PROSITE_PROFILES); IPR007087 (PROSITE_PROFILES); SSF57667 (SUPERFAMILY); SSF57667 (SUPERFAMILY); SSF57667 (SUPERFAMILY) |
| 719 | c170849_g1_i1_len_931_path_1_0_930_1                                | 23  | zinc finger protein 850-like                                  | 310 | 2.27E-38  | 57.90% | 0.1     | NON_CYTOPLASMIC_DOMAIN (PHOBIUS); TRANSMEMBRANE (PHOBIUS); TRANSMEMBRANE (PHOBIUS); NON_CYTOPLASMIC_DOMAIN (PHOBIUS); CYTOPLASMIC_DOMAIN (PHOBIUS); TMhelix (TMHMM); TMhelix (TMHMM) IPR000998 (SMART); IPR000859 (SMART); IPR000859 (PFAM); IPR000859 (G3DSA:2.60.120.GENE3D); IPR000859 (G3DSA:2.60.120.GENE3D); IPR000998 (PFAM); PTHR22991 (PANTHER); IPR000859 (PROSITE_PROFILES); IPR000998 (PROSITE_PROFILES); IPR000998 (PROSITE_PROFILES); IPR013320 (SUPERFAMILY); IPR000859 (SUPERFAMILY); TMhelix (TMHMM)                                                                                                                                                                            |
| 720 | c170862_g1_i1_len_471_path_1_0_470_2                                | 8   | ---NA---                                                      | 157 |           |        | 0.104   | IPR015876 (PRINTS); IPR005804 (PFAM); PTHR11351:SF28 (PANTHER); PTHR11351 (PANTHER); CYTOPLASMIC_DOMAIN (PHOBIUS); NON_CYTOPLASMIC_DOMAIN (PHOBIUS); CYTOPLASMIC_DOMAIN (PHOBIUS); TRANSMEMBRANE (PHOBIUS); TRANSMEMBRANE (PHOBIUS); TRANSMEMBRANE (PHOBIUS); SignalP-noTM (SIGNALP_EUK); TMhelix (TMHMM); TMhelix (TMHMM); TMhelix (TMHMM); TMhelix (TMHMM)                                                                                                                                                                                                                                                                                                                                     |
| 721 | c170906_g1_i1_len_1364_path_1342_0_1363_5                           | 59  | mam and ldl-receptor class a domain-containing protein 1-like | 454 | 4.03E-11  | 42.70% | 0.466 Y | IPR001548 (PRINTS); IPR001548 (PFAM); PTHR10514:SF17 (PANTHER); IPR001548 (PANTHER); SSF55486 (SUPERFAMILY)                                                                                                                                                                                                                                                                                                                                                                                                                                                                                                                                                                                      |
| 722 | c170908_g1_i1_len_1168_path_1_0_1167_3                              | 126 | acyl- delta desaturase                                        | 390 | 2.03E-163 | 76.30% | 0.500Y  | IPR003591 (SMART); IPR001611 (PFAM); G3DSA:3.80.10.10 (GENE3D); PTHR24369 (PANTHER); SSF52058 (SUPERFAMILY)                                                                                                                                                                                                                                                                                                                                                                                                                                                                                                                                                                                      |
| 723 | c170910_g1_i1_len_292_path_270_0_291_1                              | 4   | angiotensin-converting enzyme-like                            | 97  | 2.18E-39  | 81.30% | 0.131   | G3DSA:2.10.70.10 (GENE3D); IPR001007 (PFAM); SSF57603 (SUPERFAMILY); SSF57603 (SUPERFAMILY)                                                                                                                                                                                                                                                                                                                                                                                                                                                                                                                                                                                                      |
| 724 | c170929_g1_i1_len_1119_path_1_0_1118_1                              | 24  | connectin isoform x1                                          | 373 | 4.19E-45  | 65.70% | 0.127   | IPR002290 (SMART); IPR000719 (PFAM); G3DSA:3.30.200.20 (GENE3D); G3DSA:1.10.510.10 (GENE3D); IPR017348 (PIRSF); PTHR22984 (PANTHER); PTHR22984:SF1 (PANTHER); IPR008271 (PROSITE_PATTERNS); IPR017441 (PROSITE_PATTERNS); IPR000719 (PROSITE_PROFILES); IPR011009 (SUPERFAMILY)                                                                                                                                                                                                                                                                                                                                                                                                                  |
| 725 | c170934_g1_i1_len_293_path_271_0_292_4                              | 4   | kielin chordin-like protein                                   | 98  | 7.87E-16  | 55.70% | 0.111   | IPR002172 (SMART); IPR002172 (PFAM); IPR000998 (PFAM); IPR002172 (G3DSA:4.10.400.GENE3D); PTHR23282:SF75 (PANTHER); PTHR23282 (PANTHER); IPR023415 (PROSITE_PATTERNS); IPR002172 (PROSITE_PROFILES); IPR000998 (PROSITE_PROFILES); IPR000998 (PROSITE_PROFILES); IPR002172 (SUPERFAMILY)                                                                                                                                                                                                                                                                                                                                                                                                         |
| 726 | c171102_g1_i1_len_1075_path_1_0_1074_4                              | 103 | serine threonine-protein kinase pim-3                         | 358 | 1.08E-139 | 77.80% | 0.132   |                                                                                                                                                                                                                                                                                                                                                                                                                                                                                                                                                                                                                                                                                                  |
| 727 | c171176_g1_i1_len_431_path_1_0_430_5                                | 12  | mam and ldl-receptor class a domain-containing protein 2-like | 143 | 8.73E-30  | 58.90% | 0.108   |                                                                                                                                                                                                                                                                                                                                                                                                                                                                                                                                                                                                                                                                                                  |

|     |                                           |      |                                                                                 |     |           |        |       |                                                                                                                                                                                                                                                                                                                                                                                                                                                                                                                                                                                                   |
|-----|-------------------------------------------|------|---------------------------------------------------------------------------------|-----|-----------|--------|-------|---------------------------------------------------------------------------------------------------------------------------------------------------------------------------------------------------------------------------------------------------------------------------------------------------------------------------------------------------------------------------------------------------------------------------------------------------------------------------------------------------------------------------------------------------------------------------------------------------|
| 728 | c171277_g1_i1_len_557_path_1_0_556_3      | 9    | slit protein                                                                    | 186 | 4.08E-92  | 85.60% | 0.111 | PR00019 (PRINTS); IPR000742 (SMART); IPR000483 (SMART); IPR003591 (SMART); IPR001611 (PFAM); IPR000742 (PFAM); G3DSA:2.10.25.10 (GENE3D); G3DSA:3.80.10.10 (GENE3D); PTHR24373 (PANTHER); PTHR24373:SF110 (PANTHER); IPR013032 (PROSITE_PATTERNS); IPR013032 (PROSITE_PATTERNS); IPR001611 (PROSITE_PROFILES); IPR000742 (PROSITE_PROFILES); IPR001611 (PROSITE_PROFILES); IPR001611 (PROSITE_PROFILES); SSF57196 (SUPERFAMILY); SSF52058 (SUPERFAMILY) IPR002401 (PRINTS); IPR001128 (PRINTS); IPR001128 (PFAM); IPR001128 (G3DSA:1.10.630.GENE3D); PTHR24300 (PANTHER); IPR001128 (SUPERFAMILY) |
| 729 | c171288_g1_i1_len_1299_path_1_0_1298_5    | 44   | cytochrome p450 monooxygenase                                                   | 433 | 3.36E-116 | 59.90% | 0.099 | IPR002110 (SMART); IPR020683 (G3DSA:1.25.40.GENE3D); IPR002110 (PFAM); IPR020683 (G3DSA:1.25.40.GENE3D); IPR020683 (PFAM); IPR020683 (G3DSA:1.25.40.GENE3D); PTHR24198 (PANTHER); CYTOPLASMIC_DOMAIN (PHOBIUS); TRANSMEMBRANE (PHOBIUS); NON_CYTOPLASMIC_DOMAIN (PHOBIUS); IPR002110 (PROSITE_PROFILES); IPR002110 (PROSITE_PROFILES); IPR020683 (PROSITE_PROFILES); IPR002110 (PROSITE_PROFILES); IPR002110 (PROSITE_PROFILES); IPR002110 (PROSITE_PROFILES); IPR002110 (PROSITE_PROFILES); IPR020683 (SUPERFAMILY); TMhelix (TMHMM)                                                             |
| 730 | c171314_g1_i1_len_1872_path_1_0_1871_2    | 114  | serine threonine-protein phosphatase 6 regulatory ankyrin repeat subunit c-like | 624 | 4.63E-96  | 55.00% | 0.102 | IPR003593 (SMART); IPR003959 (PFAM); IPR005937 (TIGRFAM); G3DSA:1.10.8.60 (GENE3D); IPR027417 (G3DSA:3.40.50.GENE3D); PTHR23073:SF9 (PANTHER); PTHR23073 (PANTHER); IPR003960 (PROSITE_PATTERNS); IPR027417 (SUPERFAMILY)                                                                                                                                                                                                                                                                                                                                                                         |
| 731 | c171386_g1_i1_len_1445_path_1_0_1444_3    | 548  | 26s protease regulatory subunit 4                                               | 482 | 0         | 97.10% | 0.105 | PF14704 (PFAM); IPR026645 (PANTHER); CYTOPLASMIC_DOMAIN (PHOBIUS); NON_CYTOPLASMIC_DOMAIN (PHOBIUS); TRANSMEMBRANE (PHOBIUS); TMhelix (TMHMM)                                                                                                                                                                                                                                                                                                                                                                                                                                                     |
| 732 | c171397_g1_i1_len_693_path_671_0_692_3    | 25   | hemagglutinin amebocyte aggregation factor-like                                 | 231 | 3.32E-42  | 61.10% | 0.302 | IPR001791 (SMART); IPR000742 (SMART); G3DSA:2.10.25.10 (GENE3D); IPR001791 (PFAM); IPR013320 (G3DSA:2.60.120.GENE3D); G3DSA:2.10.25.10 (GENE3D); PTHR24026 (PANTHER); PTHR24026:SF39 (PANTHER); IPR013032 (PROSITE_PATTERNS); IPR013032 (PROSITE_PATTERNS); IPR013032 (PROSITE_PATTERNS); IPR013032 (PROSITE_PATTERNS); IPR001791 (PROSITE_PROFILES); IPR000742 (PROSITE_PROFILES); IPR013320 (SUPERFAMILY)                                                                                                                                                                                       |
| 733 | c171420_g1_i1_len_698_path_1_0_697_0      | 28   | fat-like cadherin-related tumor suppressor homolog isoform x5                   | 233 | 6.52E-97  | 77.60% | 0.104 | IPR002035 (G3DSA:3.40.50.GENE3D); IPR013642 (PFAM); PTHR10579 (PANTHER); PTHR10579:SF8 (PANTHER); IPR002035 (PROSITE_PROFILES); IPR002035 (SUPERFAMILY)                                                                                                                                                                                                                                                                                                                                                                                                                                           |
| 734 | c17148_g1_i1_len_822_path_1064_0_821_0    | 33   | calcium-activated chloride channel regulator 2                                  | 274 | 2.77E-29  | 47.00% | 0.118 | IPR002290 (SMART); G3DSA:3.30.200.20 (GENE3D); G3DSA:1.10.510.10 (GENE3D); IPR000719 (PFAM); PTHR24419:SF19 (PANTHER); PTHR24419 (PANTHER); IPR008271 (PROSITE_PATTERNS); IPR000719 (PROSITE_PROFILES); IPR011009 (SUPERFAMILY)                                                                                                                                                                                                                                                                                                                                                                   |
| 735 | c171613_g1_i1_len_1823_path_1_0_1822_2    | 68   | partial                                                                         | 607 | 3.26E-116 | 76.80% | 0.105 | IPR000436 (SMART); G3DSA:2.10.70.10 (GENE3D); IPR000436 (PFAM); G3DSA:2.10.70.10 (GENE3D); PTHR19325:SF340 (PANTHER); PTHR19325 (PANTHER); IPR000436 (PROSITE_PROFILES); IPR000436 (PROSITE_PROFILES); IPR000436 (PROSITE_PROFILES); IPR000436 (PROSITE_PROFILES); IPR000436 (SUPERFAMILY); IPR000436 (SUPERFAMILY); IPR000436 (SUPERFAMILY)                                                                                                                                                                                                                                                      |
| 736 | c171626_g1_i1_len_858_path_836_0_857_1    | 21   | von willebrand factor type egf and pentraxin domain-containing protein 1        | 286 | 1.96E-95  | 69.90% | 0.106 | Coil (COILS); IPR002456 (PRINTS); PRO1176 (PRINTS); IPR017978 (PFAM); IPR002455 (PANTHER); PTHR10519:SF3 (PANTHER); NON_CYTOPLASMIC_DOMAIN (PHOBIUS); TRANSMEMBRANE (PHOBIUS); NON_CYTOPLASMIC_DOMAIN (PHOBIUS); CYTOPLASMIC_DOMAIN (PHOBIUS); TRANSMEMBRANE (PHOBIUS); CYTOPLASMIC_DOMAIN (PHOBIUS); TRANSMEMBRANE (PHOBIUS); CYTOPLASMIC_DOMAIN (PHOBIUS); NON_CYTOPLASMIC_DOMAIN (PHOBIUS); TRANSMEMBRANE (PHOBIUS); TRANSMEMBRANE (PHOBIUS); IPR017978 (PROSITE_PROFILES); TMhelix (TMHMM); TMhelix (TMHMM); TMhelix (TMHMM); TMhelix (TMHMM); TMhelix (TMHMM)                                |
| 737 | c171713_g1_i1_len_1068_path_1046_0_1067_2 | 38   | gamma-aminobutyric acid type b receptor subunit 1                               | 356 | 1.11E-164 | 81.60% | 0.165 | IPR000889 (PFAM); IPR012336 (G3DSA:3.40.30.GENE3D); IPR000889 (PANTHER); IPR029760 (PROSITE_PATTERNS); TRANSMEMBRANE (PHOBIUS); CYTOPLASMIC_DOMAIN (PHOBIUS); NON_CYTOPLASMIC_DOMAIN (PHOBIUS); IPR000889 (PROSITE_PROFILES); IPR012336 (SUPERFAMILY); TMhelix (TMHMM)                                                                                                                                                                                                                                                                                                                            |
| 738 | c171731_g1_i1_len_1330_path_1308_0_1329_1 | 3867 | low quality protein: glutathione peroxidase 3                                   | 443 | 3.99E-59  | 63.90% | 0.21  | no IPS match                                                                                                                                                                                                                                                                                                                                                                                                                                                                                                                                                                                      |
| 739 | c17175_g2_i1_len_238_path_466_0_237_1     | 2    | preprotachykinin b                                                              | 79  | 1.15E-19  | 62.50% | 0.107 |                                                                                                                                                                                                                                                                                                                                                                                                                                                                                                                                                                                                   |

|     |                                                                                             |     |                                                           |     |           |        |       |                                                                                                                                                                                                                                                                                                                                                                                                                                                                                                                                                                                                                                            |
|-----|---------------------------------------------------------------------------------------------|-----|-----------------------------------------------------------|-----|-----------|--------|-------|--------------------------------------------------------------------------------------------------------------------------------------------------------------------------------------------------------------------------------------------------------------------------------------------------------------------------------------------------------------------------------------------------------------------------------------------------------------------------------------------------------------------------------------------------------------------------------------------------------------------------------------------|
| 740 | c171806_g1_i1_len_979_path_1_0_978_1                                                        | 415 | protein them6                                             | 326 | 2.64E-36  | 58.40% | 0.129 | Coil (COILS); PF13279 (PFAM); IPR029069 (G3DSA:3.10.129.GENE3D); PTHR12475 (PANTHER); NON_CYTOPLASMIC_DOMAIN (PHOBIUS); TRANSMEMBRANE (PHOBIUS); CYTOPLASMIC_DOMAIN (PHOBIUS); IPR029069 (SUPERFAMILY); TMhelix (TMHMM)                                                                                                                                                                                                                                                                                                                                                                                                                    |
| 741 | c171832_g1_i1_len_559_path_537_0_558_5                                                      | 23  | short neuropeptide f                                      | 186 | 2.17E-22  | 68.60% | 0.175 | no IPS match                                                                                                                                                                                                                                                                                                                                                                                                                                                                                                                                                                                                                               |
| 742 | c171932_g1_i1_len_471_path_449_0_470_0                                                      | 13  | protocadherin fat 2                                       | 157 | 2.84E-74  | 83.50% | 0.098 | IPR002126 (PRINTS); IPR002126 (SMART); IPR002126 (G3DSA:2.60.40.GENE3D); IPR002126 (PFAM); PTHR24026 (PANTHER); PTHR24026:SF39 (PANTHER); IPR020894 (PROSITE_PATTERNS); IPR002126 (PROSITE_PROFILES); IPR002126 (PROSITE_PROFILES); IPR015919 (SUPERFAMILY); IPR015919 (SUPERFAMILY)                                                                                                                                                                                                                                                                                                                                                       |
| 743 | c171933_g1_i1_len_350_path_328_0_349_3                                                      | 6   | cubilin isoform x1                                        | 117 | 3.26E-40  | 68.20% | 0.11  | IPR000859 (SMART); IPR000859 (PFAM); IPR000859 (G3DSA:2.60.120.GENE3D); PTHR10127 (PANTHER); IPR000859 (PROSITE_PROFILES); IPR000859 (SUPERFAMILY)                                                                                                                                                                                                                                                                                                                                                                                                                                                                                         |
| 744 | c172043_g1_i1_len_396_path_374_0_395_0                                                      | 10  | low-density lipoprotein receptor-related protein 2        | 132 | 1.37E-15  | 57.40% | 0.115 | IPR002172 (PRINTS); IPR002172 (SMART); IPR002172 (G3DSA:4.10.400.GENE3D); IPR002172 (PFAM); IPR002172 (G3DSA:4.10.400.GENE3D); PTHR10529 (PANTHER); IPR002172 (PROSITE_PROFILES); IPR002172 (SUPERFAMILY); IPR002172 (SUPERFAMILY); IPR002172 (SUPERFAMILY)                                                                                                                                                                                                                                                                                                                                                                                |
| 745 | c172057_g1_i1_len_310_path_1_0_309_4                                                        | 23  | heat shock cognate 71 kda                                 | 103 | 1.43E-49  | 98.00% | 0.155 | IPR013126 (PRINTS); G3DSA:3.30.30.30 (GENE3D); IPR013126 (PFAM); G3DSA:3.30.420.40 (GENE3D); PTHR19375:SF142 (PANTHER); PTHR19375 (PANTHER); IPR018181 (PROSITE_PATTERNS); SSF53067 (SUPERFAMILY)                                                                                                                                                                                                                                                                                                                                                                                                                                          |
| 746 | c172141_g1_i1_len_289_path_267_0_288_0                                                      | 20  | iron zinc purple acid phosphatase-like protein isoform x2 | 97  | 2.69E-47  | 89.30% | 0.1   | IPR004843 (PFAM); IPR029052 (G3DSA:3.60.21.GENE3D); PTHR22953:SF9 (PANTHER); PTHR22953 (PANTHER); IPR029052 (SUPERFAMILY)                                                                                                                                                                                                                                                                                                                                                                                                                                                                                                                  |
| 747 | c172300_g1_i1_len_569_path_534_0_520_10_55_521_532_1055_533_544_1055_545_556_1055_557_568_4 | 49  | protoporphyrin ix magnesium chelatase                     | 190 | 5.70E-11  | 67.50% | 0.12  | TRANSMEMBRANE (PHOBIUS); TRANSMEMBRANE (PHOBIUS); CYTOPLASMIC_DOMAIN (PHOBIUS); NON_CYTOPLASMIC_DOMAIN (PHOBIUS); CYTOPLASMIC_DOMAIN (PHOBIUS)                                                                                                                                                                                                                                                                                                                                                                                                                                                                                             |
| 748 | c172320_g1_i1_len_700_path_1_0_699_1                                                        | 183 | diuretic hormone class 2-like                             | 233 | 1.36E-29  | 73.30% | 0.155 | NON_CYTOPLASMIC_DOMAIN (PHOBIUS); CYTOPLASMIC_DOMAIN (PHOBIUS); TRANSMEMBRANE (PHOBIUS); TMhelix (TMHMM)                                                                                                                                                                                                                                                                                                                                                                                                                                                                                                                                   |
| 749 | c172410_g1_i1_len_430_path_1_0_429_4                                                        | 22  | adp-ribosylation factor-like protein 16                   | 143 | 1.62E-27  | 73.10% | 0.26  | IPR006689 (PFAM); IPR027417 (G3DSA:3.40.50.GENE3D); PTHR11711:SF42 (PANTHER); PTHR11711 (PANTHER); IPR027417 (SUPERFAMILY)                                                                                                                                                                                                                                                                                                                                                                                                                                                                                                                 |
| 750 | c172437_g1_i1_len_1333_path_1_0_1332_2                                                      | 48  | eukaryotic translation initiation factor 2-alpha kinase   | 444 | 1.95E-88  | 67.00% | 0.101 | IPR002290 (SMART); IPR000719 (PFAM); G3DSA:1.10.510.10 (GENE3D); PTHR11042 (PANTHER); PTHR11042:SF86 (PANTHER); IPR008271 (PROSITE_PATTERNS); IPR000719 (PROSITE_PROFILES); IPR011009 (SUPERFAMILY)                                                                                                                                                                                                                                                                                                                                                                                                                                        |
| 751 | c172496_g1_i1_len_701_path_1_0_700_1                                                        | 25  | zinc finger protein ozf-like                              | 234 | 1.56E-27  | 56.50% | 0.107 | IPR015880 (SMART); IPR013087 (G3DSA:3.30.160.GENE3D); PF13465 (PFAM); IPR013087 (G3DSA:3.30.160.GENE3D); IPR013087 (G3DSA:3.30.160.GENE3D); PTHR24409:SF13 (PANTHER); PTHR24409 (PANTHER); IPR007087 (PROSITE_PATTERNS); IPR007087 (PROSITE_PATTERNS); IPR007087 (PROSITE_PATTERNS); IPR007087 (PROSITE_PROFILES); IPR007087 (PROSITE_PROFILES); IPR007087 (PROSITE_PROFILES); SSF57667 (SUPERFAMILY); SSF57667 (SUPERFAMILY)                                                                                                                                                                                                              |
| 755 | c1725_g2_i1_len_1000_path_978_0_999_4                                                       | 36  | laccase- partial                                          | 333 | 1.99E-75  | 67.50% | 0.116 | IPR008972 (G3DSA:2.60.40.GENE3D); IPR008972 (G3DSA:2.60.40.GENE3D); IPR011707 (PFAM); PTHR11709:SF33 (PANTHER); PTHR11709 (PANTHER); IPR008972 (SUPERFAMILY)                                                                                                                                                                                                                                                                                                                                                                                                                                                                               |
| 752 | c172505_g1_i1_len_2031_path_2009_0_2030_3                                                   | 74  | big brain                                                 | 677 | 8.98E-136 | 61.60% | 0.236 | IPR000425 (PRINTS); IPR000425 (TIGRFAM); IPR023271 (G3DSA:1.20.1080.GENE3D); IPR000425 (PFAM); PTHR19139:SF85 (PANTHER); IPR000425 (PANTHER); IPR022357 (PROSITE_PATTERNS); CYTOPLASMIC_DOMAIN (PHOBIUS); TRANSMEMBRANE (PHOBIUS); CYTOPLASMIC_DOMAIN (PHOBIUS); CYTOPLASMIC_DOMAIN (PHOBIUS); CYTOPLASMIC_DOMAIN (PHOBIUS); TRANSMEMBRANE (PHOBIUS); TRANSMEMBRANE (PHOBIUS); NON_CYTOPLASMIC_DOMAIN (PHOBIUS); NON_CYTOPLASMIC_DOMAIN (PHOBIUS); TRANSMEMBRANE (PHOBIUS); TRANSMEMBRANE (PHOBIUS); TRANSMEMBRANE (PHOBIUS); IPR023271 (SUPERFAMILY); TMhelix (TMHMM); TMhelix (TMHMM); TMhelix (TMHMM); TMhelix (TMHMM); TMhelix (TMHMM) |

[illegible]



|     |                                           |    |                                                          |     |          |        |         |                                                                                                                                                                                                                                                                                                                                                                                                                                                                                                                                                                                   |
|-----|-------------------------------------------|----|----------------------------------------------------------|-----|----------|--------|---------|-----------------------------------------------------------------------------------------------------------------------------------------------------------------------------------------------------------------------------------------------------------------------------------------------------------------------------------------------------------------------------------------------------------------------------------------------------------------------------------------------------------------------------------------------------------------------------------|
| 763 | c172890_g1_i1_len_161_path_139_0_160_0    | 2  | stromal cell-derived factor 2                            | 54  | 3.04E-21 | 83.50% | 0.099   | G3DSA:2.80.10.50 (GENE3D); IPR027005 (PANTHER); IPR016093 (SUPERFAMILY)                                                                                                                                                                                                                                                                                                                                                                                                                                                                                                           |
| 764 | c172981_g1_i1_len_1019_path_997_0_1018_2  | 37 | nedd4 family-interacting protein 1-like                  | 339 | 2.46E-82 | 62.20% | 0.214   | IPR019325 (PFAM); PTHR13396 (PANTHER); TRANSMEMBRANE (PHOBIUS); TRANSMEMBRANE (PHOBIUS); NON_CYTOPLASMIC_DOMAIN (PHOBIUS); NON_CYTOPLASMIC_DOMAIN (PHOBIUS); TRANSMEMBRANE (PHOBIUS); CYTOPLASMIC_DOMAIN (PHOBIUS); NON_CYTOPLASMIC_DOMAIN (PHOBIUS); CYTOPLASMIC_DOMAIN (PHOBIUS); TMhelix (TMHMM); TMhelix (TMHMM); TMhelix (TMHMM)                                                                                                                                                                                                                                             |
| 765 | c172999_g1_i1_len_763_path_741_0_762_2    | 17 | spermatogenesis-associated protein partial               | 254 | 2.12E-06 | 72.00% | 0.101   | no IPS match                                                                                                                                                                                                                                                                                                                                                                                                                                                                                                                                                                      |
| 766 | c173056_g1_i1_len_515_path_493_0_514_0    | 6  | ankyrin repeat                                           | 172 | 6.46E-23 | 59.30% | 0.231   | IPR002110 (PRINTS); IPR002110 (SMART); IPR020683 (G3DSA:1.25.40.GENE3D); IPR020683 (PFAM); PTHR24198 (PANTHER); IPR002110 (PROSITE_PROFILES); IPR002110 (PROSITE_PROFILES); IPR020683 (PROSITE_PROFILES); IPR020683 (SUPERFAMILY)                                                                                                                                                                                                                                                                                                                                                 |
| 767 | c173088_g1_i1_len_593_path_571_0_592_1    | 13 | ankyrin-2-like isoform x2                                | 198 | 6.23E-17 | 54.80% | 0.142   | IPR002110 (PRINTS); IPR002110 (SMART); IPR020683 (G3DSA:1.25.40.GENE3D); IPR002110 (PFAM); IPR020683 (PFAM); PTHR24198 (PANTHER); IPR002110 (PROSITE_PROFILES); IPR002110 (PROSITE_PROFILES); IPR020683 (PROSITE_PROFILES); IPR002110 (PROSITE_PROFILES); IPR020683 (SUPERFAMILY)                                                                                                                                                                                                                                                                                                 |
| 768 | c173092_g1_i1_len_381_path_359_0_380_5    | 5  | adenosine monophosphate-protein transferase fidd homolog | 127 | 6.97E-61 | 85.80% | 0.107   | IPR003812 (G3DSA:1.10.3290.GENE3D); IPR003812 (PFAM); PTHR13504:SF12 (PANTHER); PTHR13504 (PANTHER); IPR003812 (PROSITE_PROFILES); IPR003812 (SUPERFAMILY)                                                                                                                                                                                                                                                                                                                                                                                                                        |
| 769 | c173102_g1_i1_len_694_path_672_0_693_0    | 18 | chorion peroxidase                                       | 232 | 2.63E-45 | 74.60% | 0.157   | IPR019791 (PFAM); IPR019791 (G3DSA:1.10.640.GENE3D); PTHR11475 (PANTHER); IPR019791 (PROSITE_PROFILES); IPR010255 (SUPERFAMILY)                                                                                                                                                                                                                                                                                                                                                                                                                                                   |
| 770 | c173186_g1_i1_len_327_path_1_0_326_0      | 6  | serine threonine-protein kinase 17b-like                 | 109 | 1.44E-52 | 86.10% | 0.109   | IPR000719 (PFAM); G3DSA:1.10.510.10 (GENE3D); PTHR24342 (PANTHER); IPR000719 (PROSITE_PROFILES); IPR011009 (SUPERFAMILY)                                                                                                                                                                                                                                                                                                                                                                                                                                                          |
| 771 | c173195_g1_i1_len_351_path_329_0_350_2    | 10 | prostaglandin f synthase-like                            | 117 | 3.31E-38 | 71.20% | 0.108   | IPR020471 (PRINTS); IPR023210 (PFAM); IPR023210 (G3DSA:3.20.20.GENE3D); IPR001395 (PANTHER); PTHR11732:SF133 (PANTHER); IPR018170 (PROSITE_PATTERNS); IPR023210 (SUPERFAMILY)                                                                                                                                                                                                                                                                                                                                                                                                     |
| 772 | c173214_g1_i1_len_1052_path_1_0_1051_2    | 40 | hemicentin-1 isoform x2                                  | 350 | 3.92E-86 | 57.20% | 0.105   | PR01832 (PRINTS); IPR013162 (PFAM); IPR013783 (G3DSA:2.60.40.GENE3D); IPR013783 (G3DSA:2.60.40.GENE3D); PF13895 (PFAM); PTHR11640:SF6 (PANTHER); PTHR11640 (PANTHER); IPR007110 (PROSITE_PROFILES); IPR007110 (PROSITE_PROFILES); IPR007110 (PROSITE_PROFILES); SSF48726 (SUPERFAMILY); SSF48726 (SUPERFAMILY); SSF48726 (SUPERFAMILY)                                                                                                                                                                                                                                            |
| 773 | c173227_g1_i1_len_432_path_1_0_431_0      | 6  | deleted in malignant brain tumors 1                      | 144 | 5.48E-13 | 44.80% | 0.103   | IPR017448 (G3DSA:3.10.250.GENE3D); IPR001190 (PFAM); PTHR19331:SF253 (PANTHER); PTHR19331 (PANTHER); IPR001190 (PROSITE_PROFILES); IPR001190 (PROSITE_PROFILES); IPR017448 (SUPERFAMILY); IPR017448 (SUPERFAMILY)                                                                                                                                                                                                                                                                                                                                                                 |
| 774 | c173280_g1_i1_len_682_path_1_0_681_1      | 16 | hexamerin 1                                              | 227 | 1.47E-70 | 81.20% | 0.101   | IPR005203 (PFAM); IPR005203 (G3DSA:2.60.40.GENE3D); IPR013788 (PANTHER); PTHR11511:SF5 (PANTHER); IPR014756 (SUPERFAMILY)                                                                                                                                                                                                                                                                                                                                                                                                                                                         |
| 775 | c173288_g1_i1_len_1049_path_1_0_1048_0    | 36 | latrophilin-3 isoform x2                                 | 350 | 1.86E-61 | 67.20% | 0.411 Y | IPR000832 (PRINTS); IPR000832 (PFAM); PTHR12011 (PANTHER); TRANSMEMBRANE (PHOBIUS); TRANSMEMBRANE (PHOBIUS); NON_CYTOPLASMIC_DOMAIN (PHOBIUS); TRANSMEMBRANE (PHOBIUS); TRANSMEMBRANE (PHOBIUS); CYTOPLASMIC_DOMAIN (PHOBIUS); CYTOPLASMIC_DOMAIN (PHOBIUS); NON_CYTOPLASMIC_DOMAIN (PHOBIUS); TRANSMEMBRANE (PHOBIUS); CYTOPLASMIC_DOMAIN (PHOBIUS); TRANSMEMBRANE (PHOBIUS); NON_CYTOPLASMIC_DOMAIN (PHOBIUS); CYTOPLASMIC_DOMAIN (PHOBIUS); IPR017981 (PROSITE_PROFILES); TMhelix (TMHMM); TMhelix (TMHMM); TMhelix (TMHMM); TMhelix (TMHMM); TMhelix (TMHMM); TMhelix (TMHMM) |
| 776 | c173362_g1_i1_len_1136_path_1114_0_1135_0 | 39 | dbh-like monooxygenase protein partial                   | 379 | 4.74E-14 | 50.10% | 0.107   | IPR014784 (G3DSA:2.60.120.GENE3D); PF03712 (PFAM); IPR000945 (PANTHER); IPR008977 (SUPERFAMILY)                                                                                                                                                                                                                                                                                                                                                                                                                                                                                   |
| 779 | c1735_g1_i1_len_1231_path_1209_0_1230_1   | 41 | very low-density lipoprotein partial                     | 410 | 1.94E-23 | 48.60% | 0.205   | IPR002172 (PRINTS); IPR002172 (SMART); IPR002172 (PFAM); IPR002172 (G3DSA:4.10.400.GENE3D); IPR002172 (G3DSA:4.10.400.GENE3D); IPR002172 (G3DSA:4.10.400.GENE3D); PTHR10529 (PANTHER); IPR023415 (PROSITE_PATTERNS); TRANSMEMBRANE (PHOBIUS); CYTOPLASMIC_DOMAIN (PHOBIUS); NON_CYTOPLASMIC_DOMAIN (PHOBIUS); IPR002172 (PROSITE_PROFILES); IPR002172 (PROSITE_PROFILES); IPR002172 (PROSITE_PROFILES); IPR002172 (PROSITE_PROFILES); IPR002172 (SUPERFAMILY); IPR002172 (SUPERFAMILY); IPR002172 (SUPERFAMILY)                                                                   |

|     |                                                                       |     |                                                                                        |      |           |        |       |                                                                                                                                                                                                                                                                                                                                                                                                                                                                                                                                                                                                                                                                                                                                                                                                                                                                                                                                                   |
|-----|-----------------------------------------------------------------------|-----|----------------------------------------------------------------------------------------|------|-----------|--------|-------|---------------------------------------------------------------------------------------------------------------------------------------------------------------------------------------------------------------------------------------------------------------------------------------------------------------------------------------------------------------------------------------------------------------------------------------------------------------------------------------------------------------------------------------------------------------------------------------------------------------------------------------------------------------------------------------------------------------------------------------------------------------------------------------------------------------------------------------------------------------------------------------------------------------------------------------------------|
| 780 | c1735_g1_i1_len_1231_path_1209_0_1230_2                               | 41  | very low-density lipoprotein receptor-like isoform x2                                  | 410  | 1.13E-21  | 43.60% | 0.102 | IPR002172 (PRINTS); IPR002172 (SMART); IPR002172 (G3DSA:4.10.400.GENE3D); IPR002172 (PFAM); IPR002172 (G3DSA:4.10.400.GENE3D); G3DSA:4.10.1220.10 (GENE3D); PTHR10529 (PANTHER); IPR002172 (PROSITE_PROFILES); IPR002172 (PROSITE_PROFILES); IPR002172 (PROSITE_PROFILES); IPR002172 (SUPERFAMILY); IPR002172 (SUPERFAMILY); IPR002172 (SUPERFAMILY); IPR002172 (SUPERFAMILY)                                                                                                                                                                                                                                                                                                                                                                                                                                                                                                                                                                     |
| 777 | c17356_g1_i1_len_1327_path_1355_0_1326_3                              | 80  | lipophorin receptor                                                                    | 443  | 2.28E-98  | 56.60% | 0.304 | IPR002172 (PRINTS); IPR000742 (SMART); IPR000033 (SMART); IPR002172 (SMART); IPR001881 (SMART); IPR002172 (G3DSA:4.10.400.GENE3D); IPR001881 (PFAM); G3DSA:2.10.25.10 (GENE3D); IPR002172 (G3DSA:4.10.400.GENE3D); IPR000033 (PFAM); IPR011042 (G3DSA:2.120.10.GENE3D); G3DSA:2.10.25.10 (GENE3D); IPR002172 (PFAM); PTHR10529 (PANTHER); IPR018097 (PROSITE_PATTERNS); IPR000152 (PROSITE_PATTERNS); IPR023415 (PROSITE_PATTERNS); IPR023415 (PROSITE_PATTERNS); IPR023415 (PROSITE_PATTERNS); CYTOPLASMIC_DOMAIN (PHOBIUS); NON_CYTOPLASMIC_DOMAIN (PHOBIUS); TRANSMEMBRANE (PHOBIUS); IPR000033 (PROSITE_PROFILES); IPR002172 (PROSITE_PROFILES); IPR000033 (PROSITE_PROFILES); IPR002172 (PROSITE_PROFILES); IPR000033 (PROSITE_PROFILES); IPR002172 (PROSITE_PROFILES); SSF63825 (SUPERFAMILY); IPR002172 (SUPERFAMILY); IPR002172 (SUPERFAMILY); IPR009030 (SUPERFAMILY); IPR002172 (SUPERFAMILY); IPR002172 (SUPERFAMILY); TMhelix (TMHMM) |
| 778 | c173595_g1_i1_len_3140_path_1_0_3139_4                                | 202 | macrophage mannose receptor 1                                                          | 1047 | 9.20E-20  | 38.50% | 0.14  | IPR001304 (SMART); IPR016186 (G3DSA:3.10.100.GENE3D); IPR001304 (PFAM); IPR016186 (G3DSA:3.10.100.GENE3D); PTHR22803:SF55 (PANTHER); PTHR22803 (PANTHER); IPR001304 (PROSITE_PROFILES); IPR001304 (PROSITE_PROFILES); IPR001304 (PROSITE_PROFILES); IPR016187 (SUPERFAMILY); IPR016187 (SUPERFAMILY); IPR016187 (SUPERFAMILY)                                                                                                                                                                                                                                                                                                                                                                                                                                                                                                                                                                                                                     |
| 782 | c17366_g1_i1_len_251_path_121_0_70_30_7_1_130_30_131_190_30_191_250_3 | 5   | hypothetical protein KLMA_20728                                                        | 84   | 7.59E-06  | 50.50% | 0.101 | no IPS match                                                                                                                                                                                                                                                                                                                                                                                                                                                                                                                                                                                                                                                                                                                                                                                                                                                                                                                                      |
| 781 | c173662_g1_i1_len_270_path_248_0_269_2                                | 4   | disease resistance family protein lrr family                                           | 90   | 2.76E-06  | 60.50% | 0.096 | IPR025875 (PFAM); G3DSA:3.80.10.10 (GENE3D); SSF52058 (SUPERFAMILY)                                                                                                                                                                                                                                                                                                                                                                                                                                                                                                                                                                                                                                                                                                                                                                                                                                                                               |
| 783 | c173689_g1_i1_len_300_path_1_0_299_4                                  | 6   | beta- -n-acetylgalactosaminyltransferase bre-4                                         | 100  | 8.10E-56  | 88.40% | 0.105 | IPR003859 (PRINTS); IPR027791 (PFAM); IPR029044 (G3DSA:3.90.550.GENE3D); PTHR19300:SF30 (PANTHER); IPR003859 (PANTHER); IPR029044 (SUPERFAMILY)                                                                                                                                                                                                                                                                                                                                                                                                                                                                                                                                                                                                                                                                                                                                                                                                   |
| 784 | c173820_g1_i1_len_577_path_555_0_576_0                                | 7   | achain crystal structure of engineered northeast structural genomics consortium target | 193  | 6.31E-17  | 55.10% | 0.121 | IPR002110 (SMART); IPR020683 (G3DSA:1.25.40.GENE3D); IPR020683 (PFAM); PTHR24193 (PANTHER); IPR002110 (PROSITE_PROFILES); IPR020683 (PROSITE_PROFILES); IPR002110 (PROSITE_PROFILES); IPR020683 (SUPERFAMILY)                                                                                                                                                                                                                                                                                                                                                                                                                                                                                                                                                                                                                                                                                                                                     |
| 785 | c17401_g2_i1_len_1411_path_835_0_1410_4                               | 61  | neuropilin and tolloid-like protein 2-like                                             | 470  | 1.11E-126 | 61.00% | 0.109 | IPR000859 (SMART); IPR002172 (SMART); IPR002172 (G3DSA:4.10.400.GENE3D); IPR000859 (G3DSA:2.60.120.GENE3D); IPR000859 (PFAM); IPR000859 (G3DSA:2.60.120.GENE3D); PTHR10127 (PANTHER); PTHR10127:SF572 (PANTHER); NON_CYTOPLASMIC_DOMAIN (PHOBIUS); TRANSMEMBRANE (PHOBIUS); CYTOPLASMIC_DOMAIN (PHOBIUS); IPR000859 (PROSITE_PROFILES); IPR002172 (PROSITE_PROFILES); IPR000859 (PROSITE_PROFILES); IPR002172 (SUPERFAMILY); IPR000859 (SUPERFAMILY); IPR000859 (SUPERFAMILY); TMhelix (TMHMM)                                                                                                                                                                                                                                                                                                                                                                                                                                                    |
| 786 | c174047_g1_i1_len_279_path_257_0_278_0                                | 4   | transient receptor potential cation channel subfamily a member 1 homolog               | 93   | 1.57E-28  | 66.80% | 0.103 | IPR002110 (SMART); IPR020683 (G3DSA:1.25.40.GENE3D); IPR002110 (PFAM); IPR020683 (PFAM); PTHR24198 (PANTHER); IPR002110 (PROSITE_PROFILES); IPR020683 (PROSITE_PROFILES); IPR002110 (PROSITE_PROFILES); IPR020683 (SUPERFAMILY)                                                                                                                                                                                                                                                                                                                                                                                                                                                                                                                                                                                                                                                                                                                   |
| 787 | c174091_g1_i1_len_372_path_1_0_371_2                                  | 8   | c-type mbl-2 protein                                                                   | 124  | 2.08E-11  | 54.00% | 0.137 | IPR001304 (SMART); IPR016186 (G3DSA:3.10.100.GENE3D); IPR001304 (PFAM); PTHR22802 (PANTHER); IPR001304 (PROSITE_PROFILES); IPR016187 (SUPERFAMILY)                                                                                                                                                                                                                                                                                                                                                                                                                                                                                                                                                                                                                                                                                                                                                                                                |
| 788 | c174119_g1_i1_len_271_path_1_0_270_5                                  | 5   | tyrosine-protein phosphatase lar isoform x1                                            | 90   | 7.03E-34  | 80.70% | 0.105 | IPR013783 (G3DSA:2.60.40.GENE3D); IPR013098 (PFAM); PTHR19134 (PANTHER); PTHR19134:SF199 (PANTHER); IPR007110 (PROSITE_PROFILES); SSF48726 (SUPERFAMILY)                                                                                                                                                                                                                                                                                                                                                                                                                                                                                                                                                                                                                                                                                                                                                                                          |
| 789 | c174164_g1_i1_len_922_path_900_0_921_2                                | 31  | ankyrin repeat domain-containing protein 39                                            | 307  | 2.15E-53  | 66.80% | 0.292 | IPR002110 (SMART); IPR020683 (PFAM); IPR020683 (G3DSA:1.25.40.GENE3D); PTHR24148 (PANTHER); IPR002110 (PROSITE_PROFILES); IPR002110 (PROSITE_PROFILES); IPR020683 (PROSITE_PROFILES); IPR002110 (PROSITE_PROFILES); IPR020683 (SUPERFAMILY)                                                                                                                                                                                                                                                                                                                                                                                                                                                                                                                                                                                                                                                                                                       |

|     |                                                  |      |  |                                    |      |           |        |        |                                                                                                                                                                                                                                                                                                                                                                                                                                                                                                                                                                  |
|-----|--------------------------------------------------|------|--|------------------------------------|------|-----------|--------|--------|------------------------------------------------------------------------------------------------------------------------------------------------------------------------------------------------------------------------------------------------------------------------------------------------------------------------------------------------------------------------------------------------------------------------------------------------------------------------------------------------------------------------------------------------------------------|
| 790 | c174184_g1_i1_len_764_path_742_0_763_0           | 24   |  | cytokine receptor                  | 255  | 4.03E-40  | 57.50% | 0.134  | IPR003961 (SMART); IPR013783 (G3DSA:2.60.40.GENE3D); IPR003961 (PFAM); IPR013783 (G3DSA:2.60.40.GENE3D); PTHR10489 (PANTHER); IPR003961 (PROSITE_PROFILES); IPR003961 (PROSITE_PROFILES); IPR003961 (PROSITE_PROFILES); IPR003961 (SUPERFAMILY); IPR003961 (SUPERFAMILY)                                                                                                                                                                                                                                                                                         |
| 791 | c174196_g1_i1_len_412_path_1_0_411_3             | 9    |  | papain family cysteine protease    | 138  | 6.61E-45  | 69.10% | 0.245  | IPR000668 (SMART); IPR000668 (PFAM); G3DSA:3.90.70.10 (GENE3D); PTHR12411:SF15 (PANTHER); IPR013128 (PANTHER); SSF54001 (SUPERFAMILY)                                                                                                                                                                                                                                                                                                                                                                                                                            |
| 792 | c174268_g1_i1_len_665_path_1_0_664_2             | 18   |  | centaurin-gamma 1a                 | 221  | 3.76E-77  | 71.20% | 0.164  | IPR002110 (SMART); IPR020683 (G3DSA:1.25.40.GENE3D); IPR001164 (PFAM); IPR020683 (PFAM); PTHR23180 (PANTHER); PTHR23180:SF229 (PANTHER); IPR020683 (PROSITE_PROFILES); IPR002110 (PROSITE_PROFILES); IPR020683 (SUPERFAMILY); SSF57863 (SUPERFAMILY)                                                                                                                                                                                                                                                                                                             |
| 793 | c174298_g1_i1_len_1112_path_1090_0_1111_1        | 505  |  | histone -like                      | 371  | 2.20E-81  | 99.20% | 0.105  | IPR002119 (PRINTS); IPR002119 (SMART); IPR007125 (PFAM); IPR009072 (G3DSA:1.10.20.GENE3D); PTHR23430:SF34 (PANTHER); PTHR23430 (PANTHER); IPR002119 (PROSITE_PATTERNS); NON_CYTOPLASMIC_DOMAIN (PHOBIUS); TRANSMEMBRANE (PHOBIUS); CYTOPLASMIC_DOMAIN (PHOBIUS); TRANSMEMBRANE (PHOBIUS); CYTOPLASMIC_DOMAIN (PHOBIUS); IPR009072 (SUPERFAMILY)                                                                                                                                                                                                                  |
| 794 | c174348_g1_i1_len_826_path_1_0_825_0             | 12   |  | prophenoxidase activating factor   | 276  | 1.05E-60  | 62.30% | 0.099  | IPR001314 (PRINTS); G3DSA:2.40.10.10 (GENE3D); G3DSA:2.40.10.10 (GENE3D); IPR001254 (PFAM); PTHR24268 (PANTHER); PTHR24268:SF95 (PANTHER); IPR018114 (PROSITE_PATTERNS); IPR001254 (PROSITE_PROFILES); IPR009003 (SUPERFAMILY)                                                                                                                                                                                                                                                                                                                                   |
| 795 | c174371_g1_i1_len_790_path_1_0_789_5             | 12   |  | gastrula zinc finger               | 263  | 1.96E-43  | 57.00% | 0.098  | IPR015880 (SMART); PF13465 (PFAM); IPR013087 (G3DSA:3.30.160.GENE3D); IPR007087 (PFAM); IPR013087 (G3DSA:3.30.160.GENE3D); PTHR24409 (PANTHER); IPR007087 (PROSITE_PATTERNS); IPR007087 (PROSITE_PATTERNS); IPR007087 (PROSITE_PATTERNS); IPR007087 (PROSITE_PATTERNS); IPR007087 (PROSITE_PATTERNS); IPR007087 (PROSITE_PATTERNS); IPR007087 (PROSITE_PROFILES); IPR007087 (PROSITE_PROFILES); IPR007087 (PROSITE_PROFILES); IPR007087 (PROSITE_PROFILES); IPR007087 (PROSITE_PROFILES); SSF57667 (SUPERFAMILY); SSF57667 (SUPERFAMILY); SSF57667 (SUPERFAMILY) |
| 796 | c174385_g1_i1_len_482_path_460_0_481_1           | 12   |  | dnaj homolog subfamily c member 17 | 161  | 9.87E-57  | 77.50% | 0.105  | Coil (COILS); Coil (COILS); IPR001623 (PRINTS); IPR001623 (SMART); IPR001623 (PFAM); IPR001623 (G3DSA:1.10.287.GENE3D); PTHR24078:SF153 (PANTHER); PTHR24078 (PANTHER); IPR001623 (PROSITE_PROFILES); IPR001623 (SUPERFAMILY)                                                                                                                                                                                                                                                                                                                                    |
| 797 | c174551_g1_i1_len_322_path_1_0_321_3             | 5    |  | pdz domain protein                 | 108  | 2.57E-41  | 83.10% | 0.138  | IPR001478 (SMART); IPR001478 (G3DSA:2.30.42.GENE3D); IPR001478 (PFAM); PTHR19964 (PANTHER); PTHR19964:SF22 (PANTHER); IPR001478 (PROSITE_PROFILES); IPR001478 (SUPERFAMILY)                                                                                                                                                                                                                                                                                                                                                                                      |
| 798 | c174674_g1_i1_len_1282_path_1260_0_1281_5        | 39   |  | endo-beta- -glucanase              | 427  | 3.88E-51  | 49.10% | 0.911Y | IPR012341 (G3DSA:1.50.10.GENE3D); IPR001701 (PFAM); PTHR22298 (PANTHER); NON_CYTOPLASMIC_DOMAIN (PHOBIUS); SIGNAL_PEPTIDE_C_REGION (PHOBIUS); SIGNAL_PEPTIDE_N_REGION (PHOBIUS); SIGNAL_PEPTIDE_H_REGION (PHOBIUS); SIGNAL_PEPTIDE (PHOBIUS); SignalP-TM (SIGNALP_GRAM_POSITIVE); SignalP-noTM (SIGNALP_GRAM_NEGATIVE); SignalP-noTM (SIGNALP_EUK); IPR008928 (SUPERFAMILY); IPR008965 (SUPERFAMILY)                                                                                                                                                             |
| 800 | c17468_g1_i1_len_611_path_339_0_442_25_443_610_2 | 11   |  | tequila, partial                   | 203  | 3.49E-70  | 70.30% | 0.111  | IPR001190 (PRINTS); IPR017448 (SMART); IPR002172 (SMART); IPR001190 (PFAM); IPR002172 (G3DSA:4.10.400.GENE3D); IPR002172 (PFAM); IPR017448 (G3DSA:3.10.250.GENE3D); PTHR19331 (PANTHER); IPR023415 (PROSITE_PATTERNS); IPR001190 (PROSITE_PROFILES); IPR002172 (PROSITE_PROFILES); IPR001190 (PROSITE_PROFILES); IPR017448 (SUPERFAMILY); IPR017448 (SUPERFAMILY); IPR002172 (SUPERFAMILY)                                                                                                                                                                       |
| 799 | c174686_g1_i1_len_646_path_7_0_645_3             | 1663 |  | protein bv8                        | 216  | 2.74E-20  | 59.10% | 0.177  | G3DSA:2.10.80.10 (GENE3D)                                                                                                                                                                                                                                                                                                                                                                                                                                                                                                                                        |
| 801 | c174770_g1_i1_len_3316_path_3294_0_3315_4        | 948  |  | 14-3-3 protein epsilon             | 1105 | 2.31E-161 | 95.20% | 0.165  | Coil (COILS); IPR000308 (PRINTS); IPR023410 (SMART); G3DSA:1.20.190.20 (GENE3D); IPR023410 (PFAM); IPR000308 (PANTHER); IPR023409 (PROSITE_PATTERNS); IPR023409 (PROSITE_PATTERNS); NON_CYTOPLASMIC_DOMAIN (PHOBIUS); TRANSMEMBRANE (PHOBIUS); CYTOPLASMIC_DOMAIN (PHOBIUS); TRANSMEMBRANE (PHOBIUS); NON_CYTOPLASMIC_DOMAIN (PHOBIUS); CYTOPLASMIC_DOMAIN (PHOBIUS); TRANSMEMBRANE (PHOBIUS); TMhelix (TMHMM)                                                                                                                                                   |
| 802 | c174808_g1_i1_len_312_path_290_0_311_0           | 9    |  | cytochrome p450 mitochondrial-like | 104  | 1.79E-30  | 63.30% | 0.133  | IPR002397 (PRINTS); IPR001128 (G3DSA:1.10.630.GENE3D); IPR001128 (PFAM); PTHR24291 (PANTHER); IPR001128 (SUPERFAMILY)                                                                                                                                                                                                                                                                                                                                                                                                                                            |

|     |                                        |     |                                                                  |      |           |        |       |                                                                                                                                                                                                                                                                                                                                                                                                                                                                                                                                                                                                                                                                                                                                                                                                                                                                                                 |
|-----|----------------------------------------|-----|------------------------------------------------------------------|------|-----------|--------|-------|-------------------------------------------------------------------------------------------------------------------------------------------------------------------------------------------------------------------------------------------------------------------------------------------------------------------------------------------------------------------------------------------------------------------------------------------------------------------------------------------------------------------------------------------------------------------------------------------------------------------------------------------------------------------------------------------------------------------------------------------------------------------------------------------------------------------------------------------------------------------------------------------------|
| 803 | c174811_g1_i1_len_971_path_949_0_970_5 | 30  | cysteine-rich with egf-like domain protein 2                     | 323  | 1.91E-106 | 67.40% | 0.289 | IPR021852 (PFAM); G3DSA:2.10.25.10 (GENE3D); IPR001881 (PFAM); PTHR24838:SF13 (PANTHER); PTHR24838 (PANTHER); IPR002049 (PROSITE_PATTERNS); IPR013032 (PROSITE_PATTERNS); IPR018097 (PROSITE_PATTERNS); TRANSMEMBRANE (PHOBIUS); NON_CYTOPLASMIC_DOMAIN (PHOBIUS); CYTOPLASMIC_DOMAIN (PHOBIUS); IPR000742 (PROSITE_PROFILES); TMhelix (TMHMM)                                                                                                                                                                                                                                                                                                                                                                                                                                                                                                                                                  |
| 804 | c174858_g1_i1_len_560_path_538_0_559_3 | 16  | thrombospondin type-1 domain-containing protein 4-like           | 187  | 6.53E-40  | 77.10% | 0.104 | IPR010294 (PFAM); PTHR13723 (PANTHER)                                                                                                                                                                                                                                                                                                                                                                                                                                                                                                                                                                                                                                                                                                                                                                                                                                                           |
| 805 | c174881_g1_i1_len_155_path_133_0_154_3 | 1   | hemicentin- partial                                              | 52   | 1.55E-14  | 73.10% | 0.126 | IPR023413 (G3DSA:2.40.155.GENE3D); PTHR19897:SF158 (PANTHER); PTHR19897 (PANTHER); IPR006605 (PROSITE_PROFILES); IPR009017 (SUPERFAMILY)                                                                                                                                                                                                                                                                                                                                                                                                                                                                                                                                                                                                                                                                                                                                                        |
| 806 | c175170_g1_i1_len_906_path_884_0_905_0 | 27  | low quality protein: papilin-like                                | 302  | 3.99E-144 | 81.80% | 0.1   | IPR002223 (PRINTS); IPR002223 (SMART); IPR002223 (G3DSA:4.10.410.GENE3D); IPR002223 (PFAM); IPR002223 (G3DSA:4.10.410.GENE3D); PTHR10083 (PANTHER); IPR020901 (PROSITE_PATTERNS); IPR020901 (PROSITE_PATTERNS); IPR002223 (PROSITE_PROFILES); IPR002223 (PROSITE_PROFILES); IPR002223 (SUPERFAMILY); IPR002223 (SUPERFAMILY)                                                                                                                                                                                                                                                                                                                                                                                                                                                                                                                                                                    |
| 808 | c1753_g1_i1_len_3051_path_53_0_3050_0  | 326 | otopetrin-2-like isoform x3                                      | 1017 | 0         | 70.20% | 0.139 | IPR004878 (PFAM); PTHR21522:SF41 (PANTHER); IPR004878 (PANTHER); TRANSMEMBRANE (PHOBIUS); TRANSMEMBRANE (PHOBIUS); NON_CYTOPLASMIC_DOMAIN (PHOBIUS); NON_CYTOPLASMIC_DOMAIN (PHOBIUS); TRANSMEMBRANE (PHOBIUS); CYTOPLASMIC_DOMAIN (PHOBIUS); NON_CYTOPLASMIC_DOMAIN (PHOBIUS); CYTOPLASMIC_DOMAIN (PHOBIUS); CYTOPLASMIC_DOMAIN (PHOBIUS); CYTOPLASMIC_DOMAIN (PHOBIUS); CYTOPLASMIC_DOMAIN (PHOBIUS); NON_CYTOPLASMIC_DOMAIN (PHOBIUS); CYTOPLASMIC_DOMAIN (PHOBIUS); TRANSMEMBRANE (PHOBIUS); TRANSMEMBRANE (PHOBIUS); TRANSMEMBRANE (PHOBIUS); TRANSMEMBRANE (PHOBIUS); TRANSMEMBRANE (PHOBIUS); TRANSMEMBRANE (PHOBIUS); CYTOPLASMIC_DOMAIN (PHOBIUS); TRANSMEMBRANE (PHOBIUS); NON_CYTOPLASMIC_DOMAIN (PHOBIUS); TMhelix (TMHMM); TMhelix (TMHMM) |
| 807 | c175323_g1_i1_len_414_path_392_0_413_2 | 8   | zinc finger protein                                              | 138  | 2.93E-27  | 56.00% | 0.108 | IPR015880 (SMART); IPR013087 (G3DSA:3.30.160.GENE3D); IPR013087 (G3DSA:3.30.160.GENE3D); PF13894 (PFAM); IPR007087 (PFAM); IPR013087 (G3DSA:3.30.160.GENE3D); PTHR24409 (PANTHER); PTHR24409:SF14 (PANTHER); IPR007087 (PROSITE_PATTERNS); IPR007087 (PROSITE_PATTERNS); IPR007087 (PROSITE_PATTERNS); IPR007087 (PROSITE_PROFILES); IPR007087 (PROSITE_PROFILES); IPR007087 (PROSITE_PROFILES); SSF57667 (SUPERFAMILY); SSF57667 (SUPERFAMILY)                                                                                                                                                                                                                                                                                                                                                                                                                                                 |
| 809 | c175454_g1_i1_len_844_path_1_0_843_0   | 41  | adp-ribosylation factor-like protein 1                           | 272  | 2.63E-90  | 95.60% | 0.104 | IPR006689 (PRINTS); IPR024156 (SMART); IPR006687 (SMART); IPR005225 (TIGRFAM); IPR006689 (PFAM); IPR027417 (G3DSA:3.40.50.GENE3D); PTHR11711:SF41 (PANTHER); PTHR11711 (PANTHER); IPR024156 (PROSITE_PROFILES); IPR027417 (SUPERFAMILY)                                                                                                                                                                                                                                                                                                                                                                                                                                                                                                                                                                                                                                                         |
| 810 | c175481_g1_i1_len_355_path_1_0_354_0   | 8   | fat-like cadherin-related tumor suppressor-like protein          | 119  | 6.45E-50  | 86.40% | 0.12  | IPR002126 (PRINTS); IPR002126 (SMART); IPR002126 (PFAM); IPR002126 (G3DSA:2.60.40.GENE3D); PTHR24026:SF39 (PANTHER); PTHR24026 (PANTHER); IPR020894 (PROSITE_PATTERNS); IPR002126 (PROSITE_PROFILES); IPR002126 (PROSITE_PROFILES); IPR015919 (SUPERFAMILY)                                                                                                                                                                                                                                                                                                                                                                                                                                                                                                                                                                                                                                     |
| 811 | c175494_g1_i1_len_1087_path_1_0_1086_0 | 34  | phosphodiesterase i                                              | 363  | 7.65E-17  | 61.20% | 0.171 | IPR017849 (G3DSA:3.40.720.GENE3D); IPR002591 (PFAM); IPR024873 (PANTHER); TRANSMEMBRANE (PHOBIUS); TRANSMEMBRANE (PHOBIUS); TRANSMEMBRANE (PHOBIUS); TRANSMEMBRANE (PHOBIUS); NON_CYTOPLASMIC_DOMAIN (PHOBIUS); CYTOPLASMIC_DOMAIN (PHOBIUS); NON_CYTOPLASMIC_DOMAIN (PHOBIUS); NON_CYTOPLASMIC_DOMAIN (PHOBIUS); IPR017850 (SUPERFAMILY)                                                                                                                                                                                                                                                                                                                                                                                                                                                                                                                                                       |
| 812 | c175494_g1_i1_len_1087_path_1_0_1086_2 | 34  | ectonucleotide pyrophosphatase phosphodiesterase family member 6 | 362  | 1.64E-60  | 57.00% | 0.169 | IPR017849 (G3DSA:3.40.720.GENE3D); IPR002591 (PFAM); IPR024873 (PANTHER); NON_CYTOPLASMIC_DOMAIN (PHOBIUS); TRANSMEMBRANE (PHOBIUS); CYTOPLASMIC_DOMAIN (PHOBIUS); IPR017850 (SUPERFAMILY)                                                                                                                                                                                                                                                                                                                                                                                                                                                                                                                                                                                                                                                                                                      |

|     |                                                          |     |                                                          |     |           |        |         |                                                                                                                                                                                                                                                                                                                                                                                                                                                                                                                                                                                                                                                       |
|-----|----------------------------------------------------------|-----|----------------------------------------------------------|-----|-----------|--------|---------|-------------------------------------------------------------------------------------------------------------------------------------------------------------------------------------------------------------------------------------------------------------------------------------------------------------------------------------------------------------------------------------------------------------------------------------------------------------------------------------------------------------------------------------------------------------------------------------------------------------------------------------------------------|
| 813 | c175585_g1_i1_len_534_path_1_0_533_3                     | 10  | phenoloxidase subunit a3                                 | 178 | 1.64E-52  | 66.50% | 0.102   | IPR013788 (PRINTS); IPR008922 (G3DSA:1.10.1280.GENE3D); IPR000896 (PFAM); IPR013788 (PANTHER); PTHR11511:SF24 (PANTHER); IPR013788 (PROSITE PATTERNS); IPR008922 (SUPERFAMILY)                                                                                                                                                                                                                                                                                                                                                                                                                                                                        |
| 814 | c175748_g1_i1_len_862_path_840_0_861_3                   | 29  | tripartite motif-containing protein 2-like isoform x5    | 288 | 2.35E-148 | 84.80% | 0.114   | IPR001258 (PFAM); IPR011042 (G3DSA:2.120.10.GENE3D); PTHR24103:SF1 (PANTHER); PTHR24103 (PANTHER); IPR013017 (PROSITE_PROFILES); IPR013017 (PROSITE_PROFILES); IPR013017 (PROSITE_PROFILES); IPR013017 (PROSITE_PROFILES); IPR013017 (PROSITE_PROFILES); SSF101898 (SUPERFAMILY)                                                                                                                                                                                                                                                                                                                                                                      |
| 815 | c17588_g1_i1_len_2247_path_53_0_2246_0                   | 120 | conserved hypothetical protein                           | 749 | 9.96E-139 | 53.70% | 0.493 Y | Coil (COILS); IPR002223 (PRINTS); IPR001791 (SMART); IPR002223 (SMART); IPR002223 (PFAM); IPR013320 (G3DSA:2.60.120.GENE3D); IPR001791 (PFAM); IPR002223 (G3DSA:4.10.410.GENE3D); IPR013320 (G3DSA:2.60.120.GENE3D); PTHR10574 (PANTHER); PTHR10574:SF39 (PANTHER); IPR020901 (PROSITE PATTERNS); NON_CYTOPLASMIC_DOMAIN (PHOBIUS); TRANSMEMBRANE (PHOBIUS); CYTOPLASMIC_DOMAIN (PHOBIUS); NON_CYTOPLASMIC_DOMAIN (PHOBIUS); TRANSMEMBRANE (PHOBIUS); IPR001791 (PROSITE_PROFILES); IPR001791 (PROSITE_PROFILES); IPR002223 (PROSITE_PROFILES); SignalP-noTM (SIGNALP_EUK); IPR013320 (SUPERFAMILY); IPR002223 (SUPERFAMILY); IPR013320 (SUPERFAMILY) |
| 816 | c175929_g1_i1_len_664_path_1_0_663_4                     | 14  | protein vein                                             | 221 | 1.71E-57  | 61.40% | 0.139   | IPR003598 (SMART); IPR003599 (SMART); IPR000742 (SMART); IPR013783 (G3DSA:2.60.40.GENE3D); IPR000742 (PFAM); G3DSA:2.10.25.10 (GENE3D); IPR013098 (PFAM); PTHR11100 (PANTHER); IPR013032 (PROSITE PATTERNS); IPR013032 (PROSITE PATTERNS); IPR000742 (PROSITE_PROFILES); IPR007110 (PROSITE_PROFILES); SSF48726 (SUPERFAMILY); SSF57196 (SUPERFAMILY)                                                                                                                                                                                                                                                                                                 |
| 817 | c175993_g1_i1_len_902_path_880_0_901_4                   | 32  | 5 -nucleotidase-like                                     | 301 | 9.47E-86  | 64.40% | 0.098   | IPR006179 (PRINTS); IPR008334 (PFAM); IPR029052 (G3DSA:3.60.21.GENE3D); IPR008334 (G3DSA:3.90.780.GENE3D); PTHR11575:SF21 (PANTHER); IPR006179 (PANTHER); IPR008334 (SUPERFAMILY); IPR029052 (SUPERFAMILY)                                                                                                                                                                                                                                                                                                                                                                                                                                            |
| 818 | c176038_g1_i1_len_670_path_1_0_669_2                     | 10  | zinc finger protein 121 isoform x2                       | 223 | 4.42E-21  | 73.50% | 0.2     | IPR015880 (SMART); IPR013087 (G3DSA:3.30.160.GENE3D); IPR013087 (G3DSA:3.30.160.GENE3D); PF13465 (PFAM); PTHR24409 (PANTHER); IPR007087 (PROSITE PATTERNS); IPR007087 (PROSITE PATTERNS); IPR007087 (PROSITE_PROFILES); IPR007087 (PROSITE_PROFILES); SSF57667 (SUPERFAMILY)                                                                                                                                                                                                                                                                                                                                                                          |
| 819 | c176069_g1_i1_len_1324_path_1_0_1323_0                   | 71  | trans- -dihydrobenzene- -diol dehydrogenase-like         | 442 | 4.87E-139 | 70.80% | 0.206   | IPR016040 (G3DSA:3.40.50.GENE3D); IPR000683 (PFAM); G3DSA:3.30.360.10 (GENE3D); IPR004104 (PFAM); PTHR22604:SF96 (PANTHER); PTHR22604 (PANTHER); NON_CYTOPLASMIC_DOMAIN (PHOBIUS); TRANSMEMBRANE (PHOBIUS); CYTOPLASMIC_DOMAIN (PHOBIUS); SSF55347 (SUPERFAMILY); SSF51735 (SUPERFAMILY)                                                                                                                                                                                                                                                                                                                                                              |
| 820 | c176089_g1_i1_len_485_path_463_0_484_1                   | 25  | zinc finger protein 64                                   | 162 | 2.65E-59  | 77.80% | 0.102   | IPR015880 (SMART); IPR013087 (G3DSA:3.30.160.GENE3D); PF13465 (PFAM); IPR013087 (G3DSA:3.30.160.GENE3D); IPR013087 (G3DSA:3.30.160.GENE3D); PTHR24409 (PANTHER); IPR007087 (PROSITE PATTERNS); IPR007087 (PROSITE_PROFILES); IPR007087 (PROSITE_PROFILES); IPR007087 (PROSITE_PROFILES); SSF57667 (SUPERFAMILY); SSF57667 (SUPERFAMILY)                                                                                                                                                                                                                                                                                                               |
| 821 | c176113_g1_i1_len_322_path_300_0_321_0                   | 5   | low-density lipoprotein receptor-related protein 1b-like | 108 | 1.40E-06  | 67.10% | 0.105   | IPR002172 (SMART); IPR002172 (G3DSA:4.10.400.GENE3D); IPR002172 (PFAM); IPR023415 (PROSITE PATTERNS); IPR002172 (PROSITE_PROFILES); IPR002172 (SUPERFAMILY)                                                                                                                                                                                                                                                                                                                                                                                                                                                                                           |
| 822 | c176610_g1_i1_len_416_path_394_0_415_4                   | 12  | dappu_318553-like protein                                | 139 | 8.22E-32  | 69.30% | 0.145   | IPR019791 (PRINTS); IPR019791 (G3DSA:1.10.640.GENE3D); IPR019791 (PFAM); PTHR11475 (PANTHER); IPR019791 (PROSITE_PROFILES); IPR010255 (SUPERFAMILY)                                                                                                                                                                                                                                                                                                                                                                                                                                                                                                   |
| 823 | c176746_g1_i1_len_549_path_527_0_548_4                   | 11  | ---NA---                                                 | 183 |           |        | 0.136   | G3DSA:2.40.10.10 (GENE3D); IPR001254 (PFAM); PTHR24264 (PANTHER); PTHR24264:SF9 (PANTHER); IPR009003 (SUPERFAMILY)                                                                                                                                                                                                                                                                                                                                                                                                                                                                                                                                    |
| 824 | c176794_g1_i1_len_430_path_1_0_15_17_16_222_17_223_429_1 | 4   | peptidyl-alpha-hydroxyglycine alpha-amidating lyase 1    | 143 | 3.36E-14  | 57.30% | 0.129   | IPR011042 (G3DSA:2.120.10.GENE3D); IPR001258 (PFAM); PTHR10680 (PANTHER); SSF63825 (SUPERFAMILY)                                                                                                                                                                                                                                                                                                                                                                                                                                                                                                                                                      |
| 825 | c177022_g1_i1_len_182_path_160_0_181_1                   | 3   | protein tanc2                                            | 61  | 3.92E-09  | 62.90% | 0.098   | IPR002110 (SMART); IPR020683 (PFAM); IPR020683 (G3DSA:1.25.40.GENE3D); PTHR24181 (PANTHER); IPR020683 (PROSITE_PROFILES); IPR002110 (PROSITE_PROFILES); IPR020683 (SUPERFAMILY)                                                                                                                                                                                                                                                                                                                                                                                                                                                                       |
| 826 | c177338_g1_i1_len_413_path_391_0_412_2                   | 19  | calbindin isoform a                                      | 137 | 4.69E-87  | 93.20% | 0.107   | IPR002048 (SMART); IPR011992 (PFAM); IPR011992 (G3DSA:1.10.238.GENE3D); IPR011992 (G3DSA:1.10.238.GENE3D); PTHR19972 (PANTHER); IPR018247 (PROSITE PATTERNS); IPR018247 (PROSITE PATTERNS); IPR002048 (PROSITE_PROFILES); IPR002048 (PROSITE_PROFILES); IPR002048 (PROSITE_PROFILES); SSF47473 (SUPERFAMILY)                                                                                                                                                                                                                                                                                                                                          |



|     |                                                              |     |                                                                                                                                                                           |     |           |        |       |                                                                                                                                                                                                                                                                                                                                                                                                                                                                                                                                                                         |
|-----|--------------------------------------------------------------|-----|---------------------------------------------------------------------------------------------------------------------------------------------------------------------------|-----|-----------|--------|-------|-------------------------------------------------------------------------------------------------------------------------------------------------------------------------------------------------------------------------------------------------------------------------------------------------------------------------------------------------------------------------------------------------------------------------------------------------------------------------------------------------------------------------------------------------------------------------|
| 827 | c177440_g1_i1_len_1489_path_1467_0_1488_2                    | 81  | aael005189- partial                                                                                                                                                       | 496 | 7.00E-118 | 69.90% | 0.104 | IPR003112 (SMART); IPR003112 (PFAM); PTHR23192 (PANTHER); PTHR23192:SF33 (PANTHER); IPR003112 (PROSITE_PROFILES)                                                                                                                                                                                                                                                                                                                                                                                                                                                        |
| 828 | c177455_g1_i1_len_258_path_236_0_257_0                       | 4   | fibroblast growth factor receptor-like protein 1                                                                                                                          | 86  | 1.72E-42  | 89.40% | 0.107 | IPR020635 (SMART); IPR001245 (PFAM); G3DSA:1.10.510.10 (GENE3D); PTHR24416:SF291 (PANTHER); PTHR24416 (PANTHER); IPR008266 (PROSITE_PATTERNS); IPR000719 (PROSITE_PROFILES); IPR011009 (SUPERFAMILY)                                                                                                                                                                                                                                                                                                                                                                    |
| 829 | c17751_g1_i1_len_498_path_143_0_140_284_141_497_4            | 14  | lachesin isoform x2                                                                                                                                                       | 166 | 7.57E-66  | 75.70% | 0.121 | IPR003598 (SMART); IPR003599 (SMART); IPR013106 (PFAM); IPR013098 (PFAM); IPR013783 (G3DSA:2.60.40.GENE3D); PTHR19831:SF43 (PANTHER); PTHR19831 (PANTHER); IPR007110 (PROSITE_PROFILES); SSF48726 (SUPERFAMILY); SSF48726 (SUPERFAMILY)                                                                                                                                                                                                                                                                                                                                 |
| 830 | c177703_g1_i1_len_596_path_336_0_73_410_74_334_410_335_595_3 | 8   | zinc finger protein 271 (zinc finger protein 7) (zinc finger protein znfphe133) (epstein-barr virus-induced zinc finger protein) (znf-eb) (ct-zfp48) (zinc finger protein | 199 | 8.14E-38  | 57.40% | 0.1   | IPR015880 (SMART); IPR013087 (G3DSA:3.30.160.GENE3D); PF13465 (PFAM); IPR013087 (G3DSA:3.30.160.GENE3D); IPR013087 (G3DSA:3.30.160.GENE3D); PTHR24409:SF14 (PANTHER); PTHR24409 (PANTHER); IPR007087 (PROSITE_PATTERNS); IPR007087 (PROSITE_PATTERNS); IPR007087 (PROSITE_PATTERNS); IPR007087 (PROSITE_PATTERNS); IPR007087 (PROSITE_PROFILES); IPR007087 (PROSITE_PROFILES); IPR007087 (PROSITE_PROFILES); IPR007087 (PROSITE_PROFILES); IPR007087 (PROSITE_PROFILES); SSF57667 (SUPERFAMILY); SSF57667 (SUPERFAMILY); SSF57667 (SUPERFAMILY); SSF57667 (SUPERFAMILY) |
| 831 | c177712_g1_i1_len_350_path_1_0_349_4                         | 8   | st14a protein                                                                                                                                                             | 117 | 2.12E-10  | 54.60% | 0.163 | IPR001254 (PFAM); G3DSA:2.40.10.10 (GENE3D); IPR009003 (SUPERFAMILY) IPR002126 (PRINTS); IPR002126 (SMART); IPR002126 (G3DSA:2.60.40.GENE3D); IPR002126 (PFAM); IPR002126 (G3DSA:2.60.40.GENE3D); PTHR24027 (PANTHER); PTHR24027:SF45 (PANTHER); IPR002126 (PROSITE_PROFILES); IPR002126 (PROSITE_PROFILES); IPR015919 (SUPERFAMILY); IPR015919 (SUPERFAMILY)                                                                                                                                                                                                           |
| 832 | c177815_g1_i1_len_490_path_468_0_489_1                       | 6   | cadherin- partial                                                                                                                                                         | 163 | 3.79E-55  | 69.50% | 0.132 | IPR001599 (PFAM); IPR011625 (PFAM); IPR019565 (PFAM); IPR008930 (G3DSA:1.50.10.GENE3D); PTHR11412 (PANTHER); IPR019742 (PROSITE_PATTERNS); IPR014756 (SUPERFAMILY); IPR008930 (SUPERFAMILY)                                                                                                                                                                                                                                                                                                                                                                             |
| 833 | c178059_g1_i1_len_1423_path_1_0_1422_2                       | 116 | alpha-2-macroglobulin-like protein 1                                                                                                                                      | 474 | 2.33E-131 | 59.10% | 0.164 | IPR001680 (SMART); IPR001680 (PFAM); IPR015943 (G3DSA:2.130.10.GENE3D); PTHR22847 (PANTHER); PTHR22847:SF319 (PANTHER); IPR017986 (PROSITE_PROFILES); IPR001680 (PROSITE_PROFILES); IPR017986 (SUPERFAMILY)                                                                                                                                                                                                                                                                                                                                                             |
| 834 | c178076_g1_i1_len_313_path_291_0_312_2                       | 4   | poc1 centriolar protein homolog partial                                                                                                                                   | 104 | 1.76E-45  | 81.00% | 0.096 | IPR006101 (PRINTS); IPR013781 (G3DSA:3.20.20.GENE3D); IPR006103 (PFAM); PTHR10066:SF51 (PANTHER); PTHR10066 (PANTHER); IPR023232 (PROSITE_PATTERNS); IPR023230 (PROSITE_PATTERNS); IPR017853 (SUPERFAMILY)                                                                                                                                                                                                                                                                                                                                                              |
| 835 | c178154_g1_i1_len_532_path_510_0_531_3                       | 18  | beta-glucuronidase- partial                                                                                                                                               | 178 | 1.02E-74  | 75.60% | 0.127 | G3DSA:2.40.10.10 (GENE3D); IPR001254 (PFAM); PTHR24256 (PANTHER); IPR009003 (SUPERFAMILY)                                                                                                                                                                                                                                                                                                                                                                                                                                                                               |
| 836 | c178180_g1_i1_len_344_path_322_0_343_0                       | 5   | serine protease partial                                                                                                                                                   | 115 | 2.00E-06  | 74.00% | 0.196 | IPR002172 (PRINTS); IPR002172 (SMART); IPR002172 (G3DSA:4.10.400.GENE3D); IPR002172 (G3DSA:4.10.400.GENE3D); IPR002172 (PFAM); PTHR10529:SF204 (PANTHER); PTHR10529 (PANTHER); CYTOPLASMIC_DOMAIN (PHOBIUS); NON_CYTOPLASMIC_DOMAIN (PHOBIUS); TRANSMEMBRANE (PHOBIUS); IPR002172 (PROSITE_PROFILES); IPR002172 (PROSITE_PROFILES); IPR002172 (SUPERFAMILY); IPR002172 (SUPERFAMILY)                                                                                                                                                                                    |
| 837 | c178339_g1_i1_len_405_path_383_0_404_3                       | 10  | low quality protein: sco-spondin                                                                                                                                          | 135 | 6.09E-12  | 54.90% | 0.208 | IPR002110 (SMART); IPR020683 (G3DSA:1.25.40.GENE3D); IPR020683 (PFAM); PTHR24179 (PANTHER); PTHR24179:SF23 (PANTHER); IPR002110 (PROSITE_PROFILES); IPR020683 (PROSITE_PROFILES); IPR002110 (PROSITE_PROFILES); IPR020683 (SUPERFAMILY)                                                                                                                                                                                                                                                                                                                                 |
| 838 | c178424_g1_i1_len_721_path_1_0_720_1                         | 37  | protein phosphatase 1 regulatory subunit 27                                                                                                                               | 240 | 2.58E-61  | 70.60% | 0.191 | no IPS match                                                                                                                                                                                                                                                                                                                                                                                                                                                                                                                                                            |
| 839 | c17854_g1_i1_len_163_path_1_0_162_3                          | 1   | PREDICTED: uncharacterized protein CG3556                                                                                                                                 | 55  | 1.82E-17  | 77.40% | 0.314 | IPR001424 (G3DSA:2.60.40.GENE3D); IPR001424 (PFAM); PTHR20910 (PANTHER); IPR001424 (SUPERFAMILY)                                                                                                                                                                                                                                                                                                                                                                                                                                                                        |
| 840 | c178604_g1_i1_len_527_path_1_0_526_2                         | 10  | hypothetical protein DAPPUDRAFT_192774                                                                                                                                    | 175 | 1.79E-49  | 63.50% | 0.191 | IPR000859 (SMART); IPR000859 (G3DSA:2.60.120.GENE3D); IPR000859 (PFAM); PTHR10127 (PANTHER); IPR000859 (PROSITE_PROFILES); IPR000859 (SUPERFAMILY)                                                                                                                                                                                                                                                                                                                                                                                                                      |
| 841 | c178966_g1_i1_len_257_path_1_0_256_2                         | 4   | cubilin- partial                                                                                                                                                          | 85  | 4.58E-16  | 65.80% | 0.121 | IPR001007 (PFAM); G3DSA:2.10.70.10 (GENE3D); PTHR24042:SF4 (PANTHER); PTHR24042 (PANTHER); IPR001007 (PROSITE_PROFILES); SSF57603 (SUPERFAMILY)                                                                                                                                                                                                                                                                                                                                                                                                                         |
| 842 | c179017_g1_i1_len_263_path_1_0_262_0                         | 2   | protein kinase c-binding protein nell1-like                                                                                                                               | 88  | 2.09E-17  | 61.00% | 0.115 |                                                                                                                                                                                                                                                                                                                                                                                                                                                                                                                                                                         |

|     |                                        |    |                                                                                       |     |           |        |       |                                                                                                                                                                                                                                                                                                                                                                                                       |
|-----|----------------------------------------|----|---------------------------------------------------------------------------------------|-----|-----------|--------|-------|-------------------------------------------------------------------------------------------------------------------------------------------------------------------------------------------------------------------------------------------------------------------------------------------------------------------------------------------------------------------------------------------------------|
| 843 | c179089_g1_i1_len_464_path_471_0_463_5 | 28 | interstitial collagenase                                                              | 154 | 2.17E-54  | 70.00% | 0.134 | IPR021190 (PRINTS); IPR018487 (SMART); IPR024079 (G3DSA:3.40.390.GENE3D); IPR018487 (PFAM); IPR000585 (G3DSA:2.110.10.GENE3D); IPR001818 (PFAM); PTHR10201 (PANTHER); IPR018486 (PROSITE_PATTERNS); IPR018487 (PROSITE_PROFILES); SSF55486 (SUPERFAMILY); IPR000585 (SUPERFAMILY) IPR022049 (PFAM); G3DSA:1.10.510.10 (GENE3D); PTHR32073 (PANTHER); PTHR32073:SF7 (PANTHER); IPR011009 (SUPERFAMILY) |
| 844 | c179206_g1_i1_len_635_path_1_0_634_1   | 10 | upf0672 protein c3orf58 homolog                                                       | 212 | 3.81E-30  | 55.90% | 0.106 | IPR001863 (PFAM); IPR001863 (PANTHER); IPR019803 (PROSITE_PATTERNS)                                                                                                                                                                                                                                                                                                                                   |
| 845 | c179369_g1_i1_len_392_path_1_0_391_5   | 6  | glypican- partial                                                                     | 130 | 4.42E-66  | 81.80% | 0.101 | IPR002413 (PRINTS); IPR014044 (G3DSA:3.40.33.GENE3D); IPR014044 (SUPERFAMILY)                                                                                                                                                                                                                                                                                                                         |
| 846 | c179430_g1_i1_len_286_path_1_0_285_5   | 8  | allergen 5                                                                            | 95  | 2.91E-12  | 59.80% | 0.099 | IPR002172 (SMART); IPR002172 (PFAM); IPR002172 (G3DSA:4.10.400.GENE3D); PTHR10529 (PANTHER); IPR023415 (PROSITE_PATTERNS); IPR002172 (PROSITE_PROFILES); IPR002172 (SUPERFAMILY)                                                                                                                                                                                                                      |
| 847 | c179803_g1_i1_len_398_path_20_0_397_5  | 8  | low-density lipoprotein receptor-related protein partial                              | 132 | 1.74E-08  | 46.60% | 0.102 | IPR001245 (PRINTS); IPR020635 (SMART); G3DSA:3.30.200.20 (GENE3D); IPR001245 (PFAM); G3DSA:1.10.510.10 (GENE3D); PTHR24416:SF309 (PANTHER); PTHR24416 (PANTHER); IPR008266 (PROSITE_PATTERNS); IPR002011 (PROSITE_PATTERNS); IPR000719 (PROSITE_PROFILES); IPR011009 (SUPERFAMILY)                                                                                                                    |
| 848 | c179814_g1_i1_len_603_path_1_0_602_4   | 8  | tyrosine-protein kinase transmembrane receptor ror                                    | 201 | 7.94E-122 | 90.50% | 0.107 | IPR000772 (SMART); G3DSA:2.80.10.50 (GENE3D); IPR000772 (PFAM); PTHR11675:SF24 (PANTHER); PTHR11675 (PANTHER); IPR000772 (PROSITE_PROFILES); IPR000772 (SUPERFAMILY)                                                                                                                                                                                                                                  |
| 849 | c180065_g1_i1_len_550_path_528_0_549_5 | 15 | polypeptide n-acetylgalactosaminyltransferase 2                                       | 183 | 1.21E-21  | 52.30% | 0.102 | IPR001881 (SMART); IPR000742 (SMART); G3DSA:2.10.25.10 (GENE3D); IPR000742 (PFAM); PTHR24033:SF36 (PANTHER); PTHR24033 (PANTHER); IPR013032 (PROSITE_PATTERNS); IPR000152 (PROSITE_PATTERNS); IPR018097 (PROSITE_PATTERNS); IPR000742 (PROSITE_PROFILES); SSF57196 (SUPERFAMILY)                                                                                                                      |
| 850 | c18027_g2_i1_len_145_path_203_0_144_0  | 4  | notch protein                                                                         | 49  | 1.97E-16  | 87.00% | 0.11  | IPR002110 (SMART); IPR020683 (PFAM); IPR020683 (G3DSA:1.25.40.GENE3D); PTHR24193 (PANTHER); IPR020683 (PROSITE_PROFILES); IPR002110 (PROSITE_PROFILES); IPR002110 (PROSITE_PROFILES); IPR020683 (SUPERFAMILY)                                                                                                                                                                                         |
| 851 | c180292_g1_i1_len_256_path_1_0_255_1   | 6  | achain 3ank: a designed ankyrin repeat protein with three identical consensus repeats | 85  | 7.92E-13  | 65.60% | 0.112 | IPR000859 (G3DSA:2.60.120.GENE3D); IPR000859 (PFAM); IPR000859 (PROSITE_PROFILES); IPR000859 (SUPERFAMILY)                                                                                                                                                                                                                                                                                            |
| 852 | c180413_g1_i1_len_252_path_230_0_251_3 | 3  | PREDICTED: cubilin                                                                    | 84  | 2.77E-06  | 52.50% | 0.1   | IPR001623 (PRINTS); IPR001623 (SMART); IPR001623 (G3DSA:1.10.287.GENE3D); IPR001623 (PFAM); PTHR24078 (PANTHER); PTHR24078:SF150 (PANTHER); IPR018253 (PROSITE_PATTERNS); IPR001623 (PROSITE_PROFILES); IPR001623 (SUPERFAMILY)                                                                                                                                                                       |
| 853 | c180560_g1_i1_len_303_path_281_0_302_0 | 16 | dnaj homolog subfamily c member 21-like                                               | 101 | 2.20E-36  | 86.40% | 0.136 | IPR002126 (PRINTS); IPR002126 (SMART); IPR002126 (PFAM); IPR002126 (G3DSA:2.60.40.GENE3D); PTHR24027 (PANTHER); IPR020894 (PROSITE_PATTERNS); IPR002126 (PROSITE_PROFILES); IPR002126 (PROSITE_PROFILES); IPR015919 (SUPERFAMILY); IPR015919 (SUPERFAMILY)                                                                                                                                            |
| 855 | c1807_g1_i1_len_667_path_695_0_666_4   | 15 | cadherin egf lag seven-pass g-type receptor 3                                         | 222 | 2.52E-58  | 64.20% | 0.1   | IPR001623 (PRINTS); IPR001623 (SMART); IPR001623 (G3DSA:1.10.287.GENE3D); IPR001623 (PFAM); PTHR24078 (PANTHER); PTHR24078:SF130 (PANTHER); IPR018253 (PROSITE_PATTERNS); NON_CYTOPLASMIC_DOMAIN (PHOBIUS); TRANSMEMBRANE (PHOBIUS); CYTOPLASMIC_DOMAIN (PHOBIUS); IPR001623 (PROSITE_PROFILES); IPR001623 (SUPERFAMILY); TMhelix (TMHMM)                                                             |
| 854 | c180753_g1_i1_len_333_path_1_0_332_0   | 6  | dnaj homolog subfamily c member 1-like                                                | 111 | 7.88E-49  | 85.00% | 0.117 | IPR015880 (SMART); PF13465 (PFAM); IPR013087 (G3DSA:3.30.160.GENE3D); PTHR24409 (PANTHER); IPR007087 (PROSITE_PATTERNS); IPR007087 (PROSITE_PROFILES); SSF57667 (SUPERFAMILY)                                                                                                                                                                                                                         |
| 856 | c181160_g1_i1_len_150_path_128_0_149_2 | 0  | zinc finger protein 891 isoform x8                                                    | 50  | 1.15E-14  | 81.00% | 0.101 | IPR001660 (SMART); IPR013761 (G3DSA:1.10.150.GENE3D); IPR011510 (PFAM); IPR001660 (PROSITE_PROFILES); IPR013761 (SUPERFAMILY)                                                                                                                                                                                                                                                                         |
| 857 | c181229_g1_i1_len_295_path_273_0_294_0 | 3  | transcription factor 20-like                                                          | 99  | 5.61E-15  | 71.25% | 0.103 | IPR015880 (SMART); IPR013087 (G3DSA:3.30.160.GENE3D); IPR013087 (G3DSA:3.30.160.GENE3D); IPR013087 (G3DSA:3.30.160.GENE3D); PF13465 (PFAM); PTHR24409 (PANTHER); IPR007087 (PROSITE_PATTERNS); IPR007087 (PROSITE_PATTERNS); IPR007087 (PROSITE_PATTERNS); IPR007087 (PROSITE_PROFILES); IPR007087 (PROSITE_PROFILES); IPR007087 (PROSITE_PROFILES); SSF57667 (SUPERFAMILY); SSF57667 (SUPERFAMILY)   |
| 858 | c181233_g1_i1_len_347_path_1_0_346_4   | 6  | zinc finger and scan domain-containing protein 2-like                                 | 116 | 1.22E-53  | 82.50% | 0.11  |                                                                                                                                                                                                                                                                                                                                                                                                       |

|     |                                                                                                               |     |                                                                    |     |          |        |         |                                                                                                                                                                                                                                                                                                                          |
|-----|---------------------------------------------------------------------------------------------------------------|-----|--------------------------------------------------------------------|-----|----------|--------|---------|--------------------------------------------------------------------------------------------------------------------------------------------------------------------------------------------------------------------------------------------------------------------------------------------------------------------------|
| 859 | c18125_g2_i1_len_388_path_366_0_387_0                                                                         | 4   | actin-interacting protein 1                                        | 130 | 1.38E-73 | 92.40% | 0.099   | IPR001680 (SMART); IPR001680 (PFAM); IPR015943 (G3DSA:2.130.10.GENE3D); PTHR19856 (PANTHER); IPR019775 (PROSITE_PATTERNS); IPR017986 (PROSITE_PROFILES); IPR001680 (PROSITE_PROFILES); IPR001680 (PROSITE_PROFILES); IPR017986 (SUPERFAMILY)                                                                             |
| 860 | c181909_g1_i1_len_464_path_442_0_463_0                                                                        | 14  | polypeptide n-acetylgalactosaminyltransferase 5 isoform x2         | 155 | 1.63E-47 | 72.10% | 0.116   | PTHR11675 (PANTHER); PTHR11675:SF21 (PANTHER); IPR029044 (SUPERFAMILY)                                                                                                                                                                                                                                                   |
| 861 | c181987_g1_i1_len_261_path_1_0_260_5                                                                          | 4   | protein partial                                                    | 87  | 8.72E-29 | 71.10% | 0.1     | IPR002126 (PRINTS); IPR002126 (G3DSA:2.60.40.GENE3D); IPR002126 (G3DSA:2.60.40.GENE3D); PTHR24027 (PANTHER); IPR020894 (PROSITE_PATTERNS); IPR002126 (PROSITE_PROFILES); IPR002126 (PROSITE_PROFILES); IPR015919 (SUPERFAMILY); IPR015919 (SUPERFAMILY)                                                                  |
| 862 | c182316_g1_i1_len_388_path_366_0_387_0                                                                        | 6   | fad-linked sulfhydryl oxidase partial                              | 130 | 6.25E-46 | 80.90% | 0.105   | IPR017905 (G3DSA:1.20.120.GENE3D); IPR017905 (PFAM); PTHR12645 (PANTHER); PTHR12645:SF0 (PANTHER); IPR017905 (PROSITE_PROFILES); IPR017905 (SUPERFAMILY)                                                                                                                                                                 |
| 863 | c182503_g1_i1_len_338_path_1_0_337_5                                                                          | 8   | wd repeat-containing protein 37-like                               | 112 | 4.18E-47 | 92.80% | 0.121   | IPR001680 (SMART); IPR001680 (PFAM); IPR015943 (G3DSA:2.130.10.GENE3D); PTHR19855 (PANTHER); PTHR19855:SF12 (PANTHER); IPR019775 (PROSITE_PATTERNS); IPR001680 (PROSITE_PROFILES); IPR017986 (PROSITE_PROFILES); IPR001680 (PROSITE_PROFILES); IPR017986 (SUPERFAMILY)                                                   |
| 864 | c182574_g1_i1_len_261_path_1_0_260_1                                                                          | 6   | pban-type neuropeptide                                             | 87  | 9.14E-08 | 51.00% | 0.114   | no IPS match                                                                                                                                                                                                                                                                                                             |
| 865 | c182775_g1_i1_len_431_path_1_0_430_0                                                                          | 10  | low quality protein: hemocytin                                     | 144 | 2.84E-27 | 66.70% | 0.107   | G3DSA:2.10.25.10 (GENE3D); IPR002919 (PFAM); PTHR11339:SF25 (PANTHER); PTHR11339 (PANTHER); IPR002919 (SUPERFAMILY)                                                                                                                                                                                                      |
| 867 | c1828_g1_i1_len_828_path_53_0_827_0                                                                           | 32  | isoamyl acetate-hydrolyzing esterase 1 homolog                     | 276 | 1.58E-74 | 65.70% | 0.11    | IPR013830 (G3DSA:3.40.50.GENE3D); IPR001087 (PFAM); PTHR14209 (PANTHER); IPR013830 (SUPERFAMILY)                                                                                                                                                                                                                         |
| 866 | c182887_g1_i1_len_315_path_1_0_314_5                                                                          | 4   | serine protease like protein                                       | 105 | 2.42E-12 | 73.60% | 0.126   | IPR001254 (PFAM); G3DSA:2.40.10.10 (GENE3D); PTHR24268:SF94 (PANTHER); PTHR24268 (PANTHER); IPR009003 (SUPERFAMILY)                                                                                                                                                                                                      |
| 868 | c183126_g1_i1_len_150_path_128_0_149_4                                                                        | 1   | cubilin isoform x2                                                 | 50  | 2.67E-08 | 70.00% | 0.106   | IPR000859 (PFAM); IPR000859 (G3DSA:2.60.120.GENE3D); IPR000859 (PROSITE_PROFILES); IPR000859 (SUPERFAMILY)                                                                                                                                                                                                               |
| 869 | c183232_g1_i1_len_338_path_316_0_337_2                                                                        | 8   | zinc finger protein 665-like isoform x1                            | 112 | 3.40E-16 | 61.30% | 0.12    | IPR015880 (SMART); PF13465 (PFAM); IPR013087 (G3DSA:3.30.160.GENE3D); IPR013087 (G3DSA:3.30.160.GENE3D); PTHR24409 (PANTHER); IPR007087 (PROSITE_PATTERNS); IPR007087 (PROSITE_PATTERNS); IPR007087 (PROSITE_PROFILES); IPR007087 (PROSITE_PROFILES); SignalP-TM (SIGNALP_GRAM_POSITIVE); SSF57667 (SUPERFAMILY)         |
| 870 | c183385_g1_i1_len_334_path_312_0_333_0                                                                        | 5   | c-type mannose receptor 2                                          | 112 | 6.94E-15 | 52.60% | 0.14    | IPR016186 (G3DSA:3.10.100.GENE3D); IPR001304 (PFAM); IPR016186 (G3DSA:3.10.100.GENE3D); PTHR22803 (PANTHER); IPR001304 (PROSITE_PROFILES); IPR016187 (SUPERFAMILY); IPR016187 (SUPERFAMILY)                                                                                                                              |
| 871 | c183692_g1_i1_len_838_path_816_0_837_2                                                                        | 14  | convoluted-like protein                                            | 279 | 2.70E-65 | 64.30% | 0.109   | PR00019 (PRINTS); IPR000483 (SMART); IPR003591 (SMART); G3DSA:3.80.10.10 (GENE3D); IPR013783 (G3DSA:2.60.40.GENE3D); IPR001611 (PFAM); IPR001611 (PFAM); PTHR24365:SF83 (PANTHER); PTHR24365 (PANTHER); IPR001611 (PROSITE_PROFILES); IPR001611 (PROSITE_PROFILES); IPR001611 (PROSITE_PROFILES); SSF52058 (SUPERFAMILY) |
| 872 | c18394_g1_i1_len_1680_path_1_0_1679_5                                                                         | 143 | bmp-binding endothelial regulator protein                          | 560 | 4.84E-22 | 36.50% | 0.631Y  | IPR001846 (SMART); G3DSA:2.10.70.10 (GENE3D); IPR001846 (PFAM); PTHR11339 (PANTHER); NON_CYTOPLASMIC_DOMAIN (PHOBIUS); SIGNAL_PEPTIDE_C_REGION (PHOBIUS); SIGNAL_PEPTIDE (PHOBIUS); SIGNAL_PEPTIDE_N_REGION (PHOBIUS); SIGNAL_PEPTIDE_H_REGION (PHOBIUS); IPR001846 (PROSITE_PROFILES); SignalP-noTM (SIGNALP_EUK)       |
| 873 | c184094_g1_i1_len_312_path_290_0_311_1                                                                        | 7   | extracellular serine threonine protein kinase fam20c               | 104 | 1.42E-17 | 70.90% | 0.102   | IPR024869 (PANTHER); PTHR12450:SF8 (PANTHER)                                                                                                                                                                                                                                                                             |
| 874 | c18420_g1_i1_len_1053_path_327_0_440_17<br>2_441_554_286_555_563_326_564_884_109<br>5_885_968_1095_969_1052_2 | 41  | serine carboxypeptidase cpvl                                       | 351 | 9.48E-24 | 57.30% | 0.195   | IPR001563 (PFAM); IPR029058 (G3DSA:3.40.50.GENE3D); IPR001563 (PANTHER); NON_CYTOPLASMIC_DOMAIN (PHOBIUS); NON_CYTOPLASMIC_DOMAIN (PHOBIUS); CYTOPLASMIC_DOMAIN (PHOBIUS); TRANSMEMBRANE (PHOBIUS); TRANSMEMBRANE (PHOBIUS); IPR029058 (SUPERFAMILY); TMhelix (TMHMM); TMhelix (TMHMM)                                   |
| 875 | c184530_g1_i1_len_278_path_256_0_277_4                                                                        | 4   | transferrin receptor family dimerization domain containing protein | 93  | 1.53E-26 | 71.30% | 0.111   | IPR003137 (PFAM); G3DSA:3.50.30.30 (GENE3D); PTHR10404 (PANTHER); SSF52025 (SUPERFAMILY)                                                                                                                                                                                                                                 |
| 876 | c184548_g1_i1_len_268_path_1_0_267_5                                                                          | 6   | protein giant-lens                                                 | 89  | 2.20E-25 | 75.20% | 0.719 Y | IPR021633 (PFAM); SignalP-noTM (SIGNALP_EUK); TMhelix (TMHMM)                                                                                                                                                                                                                                                            |
| 877 | c184615_g1_i1_len_523_path_1_0_522_1                                                                          | 15  | matrix metalloproteinase 2                                         | 174 | 1.52E-42 | 53.10% | 0.109   | IPR021190 (PRINTS); IPR018487 (SMART); IPR001818 (PFAM); IPR018487 (PFAM); IPR000585 (G3DSA:2.110.10.GENE3D); IPR024079 (G3DSA:3.40.390.GENE3D); PTHR10201 (PANTHER); PTHR10201:SF135 (PANTHER); IPR018487 (PROSITE_PROFILES); IPR000585 (SUPERFAMILY); SSF55486 (SUPERFAMILY)                                           |

|     |                                                              |    |                                                                               |     |          |        |         |                                                                                                                                                                                                                                                                                                                                                                                                                   |
|-----|--------------------------------------------------------------|----|-------------------------------------------------------------------------------|-----|----------|--------|---------|-------------------------------------------------------------------------------------------------------------------------------------------------------------------------------------------------------------------------------------------------------------------------------------------------------------------------------------------------------------------------------------------------------------------|
| 878 | c184706_g1_i1_len_306_path_284_0_305_3                       | 5  | zinc finger protein 729- partial                                              | 102 | 1.49E-14 | 56.40% | 0.116   | IPR015880 (SMART); IPR013087 (G3DSA:3.30.160.GENE3D); PF13465 (PFAM); PF13894 (PFAM); PTHR24409 (PANTHER); PTHR24409:SF14 (PANTHER); IPR007087 (PROSITE_PATTERNS); IPR007087 (PROSITE_PATTERNS); IPR007087 (PROSITE_PROFILES); IPR007087 (PROSITE_PROFILES); IPR007087 (PROSITE_PROFILES); SSF57667 (SUPERFAMILY); SSF57667 (SUPERFAMILY)                                                                         |
| 879 | c184734_g1_i1_len_279_path_257_0_278_0                       | 3  | peptidase partial                                                             | 93  | 3.03E-07 | 65.00% | 0.175   | IPR001254 (PFAM); G3DSA:2.40.10.10 (GENE3D); IPR009003 (SUPERFAMILY) IPR000436 (SMART); G3DSA:2.10.70.10 (GENE3D); IPR000436 (PFAM); PTHR19325 (PANTHER); SIGNAL_PEPTIDE (PHOBIUS); SIGNAL_PEPTIDE_H_REGION (PHOBIUS); NON_CYTOPLASMIC_DOMAIN (PHOBIUS); SIGNAL_PEPTIDE_N_REGION (PHOBIUS); SIGNAL_PEPTIDE_C_REGION (PHOBIUS); IPR000436 (PROSITE_PROFILES); SignalP-noTM (SIGNALP_EUK); IPR000436 (SUPERFAMILY)  |
| 880 | c184823_g1_i1_len_261_path_1_0_260_0                         | 3  | von willebrand factor type egf and pentraxin domain-containing protein 1-like | 87  | 4.70E-19 | 70.40% | 0.751 Y | G3DSA:2.10.25.10 (GENE3D); IPR013111 (PFAM); PTHR11841 (PANTHER); SSF57196 (SUPERFAMILY)                                                                                                                                                                                                                                                                                                                          |
| 881 | c184929_g1_i1_len_235_path_213_0_234_4                       | 3  | reelin-like isoform x4                                                        | 78  | 1.10E-24 | 68.30% | 0.129   | IPR000859 (SMART); IPR000859 (PFAM); IPR000859 (G3DSA:2.60.120.GENE3D); PTHR10127 (PANTHER); IPR000859 (PROSITE_PROFILES); IPR000859 (SUPERFAMILY)                                                                                                                                                                                                                                                                |
| 882 | c18500_g1_i1_len_411_path_1_0_410_4                          | 5  | cubilin                                                                       | 137 | 2.14E-24 | 58.20% | 0.138   | IPR000859 (PFAM); IPR000859 (G3DSA:2.60.120.GENE3D); IPR000859 (PROSITE_PROFILES); IPR000859 (SUPERFAMILY)                                                                                                                                                                                                                                                                                                        |
| 883 | c18500_g2_i1_len_225_path_979_0_224_5                        | 2  | hypothetical protein D918_02869                                               | 75  | 9.84E-06 | 54.00% | 0.105   | no IPS match                                                                                                                                                                                                                                                                                                                                                                                                      |
| 884 | c185084_g1_i1_len_506_path_1_0_445_447_446_475_447_476_505_4 | 9  | ppmp i antigen cs34                                                           | 169 | 1.42E-20 | 44.60% | 0.104   | IPR015880 (SMART); IPR013087 (G3DSA:3.30.160.GENE3D); PF13465 (PFAM); IPR013087 (G3DSA:3.30.160.GENE3D); IPR013087 (G3DSA:3.30.160.GENE3D); PTHR24409 (PANTHER); IPR007087 (PROSITE_PATTERNS); IPR007087 (PROSITE_PATTERNS); IPR007087 (PROSITE_PROFILES); IPR007087 (PROSITE_PROFILES); SSF57667 (SUPERFAMILY); SSF57667 (SUPERFAMILY)                                                                           |
| 885 | c185162_g1_i1_len_263_path_241_0_262_2                       | 6  | zinc finger protein 525-like                                                  | 87  | 6.51E-20 | 64.00% | 0.169   | G3DSA:2.40.10.10 (GENE3D); G3DSA:2.40.10.10 (GENE3D); IPR001254 (PFAM); IPR009003 (SUPERFAMILY)                                                                                                                                                                                                                                                                                                                   |
| 886 | c185179_g1_i1_len_319_path_297_0_318_0                       | 2  | prostasin isoform x2                                                          | 107 | 1.45E-07 | 58.50% | 0.115   | IPR002172 (PRINTS); IPR002172 (SMART); IPR002172 (PFAM); IPR002172 (G3DSA:4.10.400.GENE3D); PTHR10529 (PANTHER); IPR002172 (PROSITE_PROFILES); IPR002172 (PROSITE_PROFILES); IPR002172 (SUPERFAMILY); IPR002172 (SUPERFAMILY)                                                                                                                                                                                     |
| 887 | c185219_g1_i1_len_279_path_257_0_278_0                       | 6  | low-density lipoprotein receptor-related protein 2                            | 93  | 4.27E-46 | 87.20% | 0.107   | IPR000917 (PFAM); IPR017849 (G3DSA:3.40.720.GENE3D); PTHR10342 (PANTHER); PTHR10342:SF183 (PANTHER); IPR024607 (PROSITE_PATTERNS); IPR017850 (SUPERFAMILY)                                                                                                                                                                                                                                                        |
| 888 | c185221_g1_i1_len_373_path_351_0_372_5                       | 4  | extracellular sulfatase sulf-1-like partial                                   | 124 | 2.59E-45 | 85.10% | 0.101   | IPR014044 (SMART); IPR014044 (PFAM); IPR014044 (G3DSA:3.40.33.GENE3D); IPR001283 (PANTHER); PTHR10334:SF189 (PANTHER); IPR014044 (SUPERFAMILY)                                                                                                                                                                                                                                                                    |
| 889 | c185465_g1_i1_len_286_path_264_0_285_0                       | 5  | golgi-associated plant pathogenesis-related protein 1                         | 96  | 2.68E-35 | 63.60% | 0.103   | IPR014853 (SMART); IPR014853 (PFAM); PTHR11339:SF224 (PANTHER); PTHR11339 (PANTHER)                                                                                                                                                                                                                                                                                                                               |
| 890 | c185478_g1_i1_len_271_path_249_0_270_3                       | 8  | kielin chordin-like protein                                                   | 91  | 6.20E-37 | 78.30% | 0.142   | IPR015880 (SMART); IPR007087 (PFAM); IPR013087 (G3DSA:3.30.160.GENE3D); PF13894 (PFAM); IPR013087 (G3DSA:3.30.160.GENE3D); IPR013087 (G3DSA:3.30.160.GENE3D); PTHR24409 (PANTHER); IPR007087 (PROSITE_PATTERNS); IPR007087 (PROSITE_PATTERNS); IPR007087 (PROSITE_PROFILES); IPR007087 (PROSITE_PROFILES); IPR007087 (PROSITE_PROFILES); SSF57667 (SUPERFAMILY); SSF57667 (SUPERFAMILY)                           |
| 891 | c185856_g1_i1_len_319_path_1_0_318_5                         | 6  | zinc finger protein 37-like                                                   | 106 | 3.09E-19 | 61.00% | 0.102   | IPR029034 (G3DSA:2.10.90.GENE3D); IPR001839 (PFAM); PTHR11848:SF131 (PANTHER); IPR015615 (PANTHER); IPR001839 (PROSITE_PROFILES); SignalP-noTM (SIGNALP_EUK); IPR029034 (SUPERFAMILY)                                                                                                                                                                                                                             |
| 892 | c186210_g1_i1_len_156_path_134_0_155_1                       | 3  | bone morphogenetic protein 7-like                                             | 52  | 5.01E-13 | 85.60% | 0.481 Y | IPR002172 (PRINTS); IPR002172 (SMART); IPR002172 (G3DSA:4.10.400.GENE3D); IPR002172 (PFAM); IPR002172 (G3DSA:4.10.400.GENE3D); IPR002172 (G3DSA:4.10.400.GENE3D); PTHR10529 (PANTHER); IPR023415 (PROSITE_PATTERNS); IPR023415 (PROSITE_PATTERNS); IPR023415 (PROSITE_PROFILES); IPR023415 (PROSITE_PROFILES); IPR002172 (SUPERFAMILY); IPR002172 (SUPERFAMILY); IPR002172 (SUPERFAMILY); IPR002172 (SUPERFAMILY) |
| 895 | c1870_g1_i1_len_604_path_632_0_603_5                         | 21 | vitellogenin receptor                                                         | 201 | 7.34E-20 | 47.90% | 0.142   |                                                                                                                                                                                                                                                                                                                                                                                                                   |

|     |                                                                                                      |    |                                                                      |     |          |        |         |                                                                                                                                                                                                                                                                                                                                                                       |
|-----|------------------------------------------------------------------------------------------------------|----|----------------------------------------------------------------------|-----|----------|--------|---------|-----------------------------------------------------------------------------------------------------------------------------------------------------------------------------------------------------------------------------------------------------------------------------------------------------------------------------------------------------------------------|
| 893 | c187058_g1_i1_len_315_path_1_0_44_46_45_93_95_94_117_119_118_168_95_169_192_119_193_243_95_244_267_1 | 6  | repetitive proline-rich cell wall protein 2-like                     | 105 | 2.70E-14 | 58.40% | 0.149   | no IPS match                                                                                                                                                                                                                                                                                                                                                          |
| 894 | c187068_g1_i1_len_313_path_1_0_312_5                                                                 | 4  | protein turtle homolog a isoform x2                                  | 104 | 9.24E-07 | 52.40% | 0.121   | IPR003598 (SMART); IPR013098 (PFAM); IPR013783 (G3DSA:2.60.40.GENE3D); PTHR10489 (PANTHER); IPR007110 (PROSITE_PROFILES); SSF48726 (SUPERFAMILY)                                                                                                                                                                                                                      |
| 896 | c187141_g1_i1_len_256_path_234_0_255_0                                                               | 4  | short gastrulation                                                   | 86  | 1.96E-19 | 57.40% | 0.099   | IPR001007 (SMART); IPR001007 (PFAM); G3DSA:2.10.70.10 (GENE3D); SSF57603 (SUPERFAMILY)                                                                                                                                                                                                                                                                                |
| 897 | c18742_g2_i1_len_411_path_201_0_410_5                                                                | 6  | serine threonine-protein kinase 17a-like                             | 137 | 1.33E-49 | 74.90% | 0.105   | IPR002290 (SMART); IPR000719 (PFAM); G3DSA:3.30.200.20 (GENE3D); PTHR24342 (PANTHER); IPR000719 (PROSITE_PROFILES); IPR011009 (SUPERFAMILY)                                                                                                                                                                                                                           |
| 898 | c187431_g1_i1_len_268_path_1_0_267_5                                                                 | 8  | class c metabotropic glutamate-like g-protein coupled receptor       | 89  | 1.79E-13 | 77.40% | 0.315   | G3DSA:3.40.50.2300 (GENE3D); CYTOPLASMIC_DOMAIN (PHOBIUS); NON_CYTOPLASMIC_DOMAIN (PHOBIUS); TRANSMEMBRANE (PHOBIUS); IPR028082 (SUPERFAMILY); TMhelix (TMHMM)                                                                                                                                                                                                        |
| 899 | c187504_g1_i1_len_187_path_165_0_186_1                                                               | 3  | zinc finger protein                                                  | 62  | 5.88E-11 | 64.50% | 0.099   | IPR015880 (SMART); IPR013087 (G3DSA:3.30.160.GENE3D); IPR013087 (G3DSA:3.30.160.GENE3D); PF13465 (PFAM); PTHR24409 (PANTHER); PTHR24409:SF14 (PANTHER); IPR007087 (PROSITE_PATTERNS); IPR007087 (PROSITE_PATTERNS); IPR007087 (PROSITE_PROFILES); IPR007087 (PROSITE_PROFILES); SSF57667 (SUPERFAMILY)                                                                |
| 900 | c187653_g1_i1_len_425_path_1_0_424_1                                                                 | 9  | down syndrome cell adhesion molecule                                 | 142 | 1.28E-37 | 66.40% | 0.163   | IPR003961 (SMART); IPR013783 (G3DSA:2.60.40.GENE3D); IPR003961 (PFAM); PTHR10489 (PANTHER); PTHR10489:SF580 (PANTHER); TRANSMEMBRANE (PHOBIUS); CYTOPLASMIC_DOMAIN (PHOBIUS); NON_CYTOPLASMIC_DOMAIN (PHOBIUS); IPR003961 (PROSITE_PROFILES); IPR003961 (SUPERFAMILY); TMhelix (TMHMM)                                                                                |
| 901 | c187797_g1_i1_len_336_path_1_0_335_5                                                                 | 4  | ---NA---                                                             | 112 |          |        | 0.167   | IPR014853 (PFAM)                                                                                                                                                                                                                                                                                                                                                      |
| 902 | c187925_g1_i1_len_275_path_253_0_274_4                                                               | 4  | vitellogenin                                                         | 92  | 9.23E-30 | 74.30% | 0.098   | IPR001846 (PFAM); IPR001846 (PROSITE_PROFILES)                                                                                                                                                                                                                                                                                                                        |
| 903 | c188142_g1_i1_len_267_path_1_0_266_2                                                                 | 4  | zinc finger protein partial                                          | 89  | 2.07E-15 | 60.10% | 0.1     | IPR015880 (SMART); IPR013087 (G3DSA:3.30.160.GENE3D); IPR013087 (G3DSA:3.30.160.GENE3D); IPR013087 (G3DSA:3.30.160.GENE3D); PF13465 (PFAM); PTHR24409 (PANTHER); PTHR24409:SF13 (PANTHER); IPR007087 (PROSITE_PATTERNS); IPR007087 (PROSITE_PATTERNS); IPR007087 (PROSITE_PROFILES); IPR007087 (PROSITE_PROFILES); SSF57667 (SUPERFAMILY); SSF57667 (SUPERFAMILY)     |
| 904 | c188173_g1_i1_len_221_path_1_0_220_3                                                                 | 2  | serine protease                                                      | 74  | 6.70E-12 | 74.10% | 0.117   | IPR001254 (PFAM); G3DSA:2.40.10.10 (GENE3D); PTHR24268:SF94 (PANTHER); PTHR24268 (PANTHER); IPR009003 (SUPERFAMILY)                                                                                                                                                                                                                                                   |
| 905 | c188718_g1_i1_len_266_path_1_0_265_0                                                                 | 4  | zinc finger protein 69                                               | 89  | 1.83E-18 | 63.20% | 0.321   | IPR015880 (SMART); PF13465 (PFAM); IPR013087 (G3DSA:3.30.160.GENE3D); IPR013087 (G3DSA:3.30.160.GENE3D); IPR013087 (G3DSA:3.30.160.GENE3D); PTHR24409 (PANTHER); IPR007087 (PROSITE_PATTERNS); IPR007087 (PROSITE_PATTERNS); IPR007087 (PROSITE_PROFILES); IPR007087 (PROSITE_PROFILES); IPR007087 (PROSITE_PROFILES); SSF57667 (SUPERFAMILY); SSF57667 (SUPERFAMILY) |
| 906 | c18878_g1_i1_len_622_path_1_0_421_1170_422_621_4                                                     | 9  | fukutin isoform 2                                                    | 207 | 1.68E-48 | 65.70% | 0.391 Y | IPR007074 (PFAM); IPR009644 (PANTHER); SIGNAL_PEPTIDE_H_REGION (PHOBIUS); SIGNAL_PEPTIDE (PHOBIUS); SIGNAL_PEPTIDE_N_REGION (PHOBIUS); NON_CYTOPLASMIC_DOMAIN (PHOBIUS); SIGNAL_PEPTIDE_C_REGION (PHOBIUS); TMhelix (TMHMM)                                                                                                                                           |
| 907 | c18878_g1_i2_len_596_path_1_0_421_423_4_22_595_5                                                     | 6  | fukutin isoform 2                                                    | 198 | 8.30E-49 | 67.70% | 0.12    | IPR007074 (PFAM); IPR009644 (PANTHER)                                                                                                                                                                                                                                                                                                                                 |
| 908 | c189076_g1_i1_len_198_path_1_0_197_1                                                                 | 0  | zinc c2h2 type domain-containing protein                             | 66  | 2.92E-12 | 62.40% | 0.111   | IPR015880 (SMART); IPR008598 (PFAM); IPR013087 (G3DSA:3.30.160.GENE3D); IPR013087 (G3DSA:3.30.160.GENE3D); PTHR24409:SF14 (PANTHER); PTHR24409 (PANTHER); IPR007087 (PROSITE_PATTERNS); IPR007087 (PROSITE_PATTERNS); IPR007087 (PROSITE_PROFILES); IPR007087 (PROSITE_PROFILES); IPR007087 (PROSITE_PROFILES); SSF57667 (SUPERFAMILY)                                |
| 909 | c18927_g1_i1_len_363_path_701_0_362_4                                                                | 6  | dehydrogenase reductase sdr family member on chromosome partial      | 121 | 4.39E-23 | 65.30% | 0.119   | IPR016040 (G3DSA:3.40.50.GENE3D); PTHR24320:SF55 (PANTHER); PTHR24320 (PANTHER); SSF51735 (SUPERFAMILY)                                                                                                                                                                                                                                                               |
| 910 | c189465_g1_i1_len_270_path_248_0_269_5                                                               | 7  | insulin-like growth factor-binding protein complex acid labile chain | 90  | 9.50E-13 | 60.20% | 0.158   | PR00019 (PRINTS); IPR003591 (SMART); IPR001611 (PFAM); G3DSA:3.80.10.10 (GENE3D); PTHR24365 (PANTHER); IPR001611 (PROSITE_PROFILES); IPR001611 (PROSITE_PROFILES); IPR001611 (PROSITE_PROFILES); SSF52058 (SUPERFAMILY)                                                                                                                                               |
| 911 | c189532_g1_i1_len_501_path_1_0_500_0                                                                 | 12 | 15-hydroxyprostaglandin dehydrogenase                                | 167 | 1.86E-82 | 76.00% | 0.117   | IPR002198 (PRINTS); IPR002424 (PRINTS); IPR002198 (PFAM); IPR016040 (G3DSA:3.40.50.GENE3D); PTHR24310 (PANTHER); SSF51735 (SUPERFAMILY)                                                                                                                                                                                                                               |
| 912 | c1896_g1_i1_len_340_path_1_0_339_1                                                                   | 23 | cytochrome p450 partial                                              | 113 | 1.07E-36 | 72.20% | 0.116   | IPR002401 (PRINTS); IPR001128 (PRINTS); IPR001128 (PFAM); IPR001128 (G3DSA:1.10.630.GENE3D); PTHR24292 (PANTHER); IPR017972 (PROSITE_PATTERNS); IPR001128 (SUPERFAMILY)                                                                                                                                                                                               |



|     |                                                                          |     |                                                   |      |           |        |         |                                                                                                                                                                                                                                                                                                                                                                                                                                                                                                                                                                                                                                                                                                   |
|-----|--------------------------------------------------------------------------|-----|---------------------------------------------------|------|-----------|--------|---------|---------------------------------------------------------------------------------------------------------------------------------------------------------------------------------------------------------------------------------------------------------------------------------------------------------------------------------------------------------------------------------------------------------------------------------------------------------------------------------------------------------------------------------------------------------------------------------------------------------------------------------------------------------------------------------------------------|
| 913 | c19129_g1_i1_len_369_path_347_0_368_4                                    | 10  | moxd1 homolog 1                                   | 123  | 1.12E-29  | 66.30% | 0.098   | PF03712 (PFAM); IPR014784 (G3DSA:2.60.120.GENE3D); IPR000945 (PANTHER); IPR008977 (SUPERFAMILY)                                                                                                                                                                                                                                                                                                                                                                                                                                                                                                                                                                                                   |
| 914 | c191633_g1_i1_len_151_path_129_0_150_4                                   | 1   | beta- -n-acetylgalactosaminyltransferase bre-4    | 50   | 7.16E-16  | 78.60% | 0.102   | IPR029044 (G3DSA:3.90.550.GENE3D); IPR027791 (PFAM); IPR003859 (PANTHER); IPR029044 (SUPERFAMILY)                                                                                                                                                                                                                                                                                                                                                                                                                                                                                                                                                                                                 |
| 915 | c19193_g1_i1_len_544_path_75_0_543_1                                     | 70  | anti-lipopolysaccharide partial                   | 181  | 5.91E-20  | 68.70% | 0.796 Y | IPR024509 (PFAM); SIGNAL_PEPTIDE (PHOBIUS); SIGNAL_PEPTIDE_H_REGION (PHOBIUS); SIGNAL_PEPTIDE_N_REGION (PHOBIUS); SIGNAL_PEPTIDE_C_REGION (PHOBIUS); NON_CYTOPLASMIC_DOMAIN (PHOBIUS); IPR024716 (PRODOM); SignalP-noTM (SIGNALP_EUK)                                                                                                                                                                                                                                                                                                                                                                                                                                                             |
| 916 | c192165_g1_i1_len_292_path_16_0_291_4                                    | 3   | zinc finger protein rotund-like isoform x1        | 97   | 2.51E-43  | 96.00% | 0.141   | IPR015880 (SMART); IPR013087 (G3DSA:3.30.160.GENE3D); IPR013087 (G3DSA:3.30.160.GENE3D); PF13465 (PFAM); IPR007087 (PFAM); PTHR11389:SF431 (PANTHER); PTHR11389 (PANTHER); IPR007087 (PROSITE_PATTERNS); IPR007087 (PROSITE_PATTERNS); IPR007087 (PROSITE_PATTERNS); IPR007087 (PROSITE_PROFILES); IPR007087 (PROSITE_PROFILES); SSF57667 (SUPERFAMILY); SSF57667 (SUPERFAMILY)                                                                                                                                                                                                                                                                                                                   |
| 917 | c19356_g1_i1_len_1588_path_1566_0_1587_0                                 | 829 | ves g 5 allergen                                  | 530  | 2.17E-46  | 52.50% | 0.754 Y | IPR001283 (PRINTS); IPR002413 (PRINTS); IPR002172 (SMART); IPR014044 (SMART); IPR002172 (PFAM); IPR014044 (G3DSA:3.40.33.GENE3D); IPR014044 (PFAM); IPR002172 (G3DSA:4.10.400.GENE3D); IPR001283 (PANTHER); IPR023415 (PROSITE_PATTERNS); IPR018244 (PROSITE_PATTERNS); IPR018244 (PROSITE_PATTERNS); CYTOPLASMIC_DOMAIN (PHOBIUS); TRANSMEMBRANE (PHOBIUS); SIGNAL_PEPTIDE_N_REGION (PHOBIUS); SIGNAL_PEPTIDE (PHOBIUS); NON_CYTOPLASMIC_DOMAIN (PHOBIUS); SIGNAL_PEPTIDE_H_REGION (PHOBIUS); SIGNAL_PEPTIDE_C_REGION (PHOBIUS); IPR002172 (PROSITE_PROFILES); SignalP-TM (SIGNALP_GRAM_POSITIVE); SignalP-noTM (SIGNALP_EUK); IPR002172 (SUPERFAMILY); IPR014044 (SUPERFAMILY); TMhelix (TMHMM) |
| 918 | c193640_g1_i1_len_319_path_1_0_318_0                                     | 7   | zinc finger and scan domain-containing protein 22 | 107  | 2.18E-28  | 69.50% | 0.1     | IPR015880 (SMART); IPR013087 (G3DSA:3.30.160.GENE3D); IPR007087 (PFAM); IPR013087 (G3DSA:3.30.160.GENE3D); PF13465 (PFAM); IPR013087 (G3DSA:3.30.160.GENE3D); PTHR24409 (PANTHER); IPR007087 (PROSITE_PATTERNS); IPR007087 (PROSITE_PATTERNS); IPR007087 (PROSITE_PATTERNS); IPR007087 (PROSITE_PROFILES); IPR007087 (PROSITE_PROFILES); SSF57667 (SUPERFAMILY); SSF57667 (SUPERFAMILY)                                                                                                                                                                                                                                                                                                           |
| 919 | c194713_g1_i1_len_205_path_126_0_53_126_54_107_126_108_161_179_162_204_0 | 0   | ---NA---                                          | 69   |           |        | 0.109   | no IPS match                                                                                                                                                                                                                                                                                                                                                                                                                                                                                                                                                                                                                                                                                      |
| 920 | c19568_g1_i1_len_290_path_29_0_75_105_7_6_108_138_109_289_0              | 5   | histone h2b-like                                  | 97   | 9.23E-47  | 97.40% | 0.142   | IPR000558 (PRINTS); IPR000558 (SMART); IPR007125 (PFAM); IPR009072 (G3DSA:1.10.20.GENE3D); IPR000558 (PANTHER); SignalP-TM (SIGNALP_GRAM_POSITIVE); IPR009072 (SUPERFAMILY)                                                                                                                                                                                                                                                                                                                                                                                                                                                                                                                       |
| 921 | c19658_g1_i1_len_3178_path_49_0_431_480_432_433_48_434_3177_3            | 261 | usher syndrome type-1g protein homolog            | 1060 | 4.48E-132 | 62.20% | 0.112   | Coil (COILS); IPR002110 (SMART); IPR001660 (SMART); IPR013761 (G3DSA:1.10.150.GENE3D); IPR020683 (PFAM); IPR021129 (PFAM); IPR020683 (G3DSA:1.25.40.GENE3D); PTHR24161 (PANTHER); PTHR24161:SF6 (PANTHER); IPR020683 (PROSITE_PROFILES); IPR002110 (PROSITE_PROFILES); IPR020683 (SUPERFAMILY); IPR013761 (SUPERFAMILY)                                                                                                                                                                                                                                                                                                                                                                           |
| 922 | c19670_g1_i1_len_1506_path_1484_0_1505_3                                 | 460 | chymotrypsinogen a                                | 502  | 6.19E-95  | 58.40% | 0.261   | IPR001314 (PRINTS); IPR001254 (SMART); G3DSA:2.40.10.10 (GENE3D); G3DSA:2.40.10.10 (GENE3D); G3DSA:2.40.10.10 (GENE3D); IPR001254 (PFAM); PTHR24260 (PANTHER); PTHR24260:SF47 (PANTHER); TRANSMEMBRANE (PHOBIUS); CYTOPLASMIC_DOMAIN (PHOBIUS); NON_CYTOPLASMIC_DOMAIN (PHOBIUS); TRANSMEMBRANE (PHOBIUS); NON_CYTOPLASMIC_DOMAIN (PHOBIUS); IPR001254 (PROSITE_PROFILES); IPR009003 (SUPERFAMILY); TMhelix (TMHMM)                                                                                                                                                                                                                                                                               |
| 923 | c1979_g1_i1_len_1537_path_1_0_1536_4                                     | 232 | chitinase domain-containing protein 1 isoform x1  | 512  | 2.10E-149 | 70.30% | 0.142   | IPR011583 (SMART); IPR001223 (PFAM); IPR013781 (G3DSA:3.20.20.GENE3D); PTHR11177 (PANTHER); PTHR11177:SF135 (PANTHER); TRANSMEMBRANE (PHOBIUS); CYTOPLASMIC_DOMAIN (PHOBIUS); NON_CYTOPLASMIC_DOMAIN (PHOBIUS); IPR017853 (SUPERFAMILY); TMhelix (TMHMM)                                                                                                                                                                                                                                                                                                                                                                                                                                          |
| 924 | c19813_g1_i1_len_341_path_1_0_340_1                                      | 4   | fibroblast growth factor receptor-like partial    | 114  | 1.02E-23  | 64.40% | 0.104   | IPR003599 (SMART); IPR003598 (SMART); IPR013783 (G3DSA:2.60.40.GENE3D); IPR013098 (PFAM); PTHR19890 (PANTHER); PTHR19890:SF5 (PANTHER); IPR007110 (PROSITE_PROFILES); SSF48726 (SUPERFAMILY)                                                                                                                                                                                                                                                                                                                                                                                                                                                                                                      |

|     |                                                                |     |                                                            |     |           |        |         |                                                                                                                                                                                                                                                                                                                                                                                                        |
|-----|----------------------------------------------------------------|-----|------------------------------------------------------------|-----|-----------|--------|---------|--------------------------------------------------------------------------------------------------------------------------------------------------------------------------------------------------------------------------------------------------------------------------------------------------------------------------------------------------------------------------------------------------------|
| 925 | c19821_g1_i1_len_760_path_1_0_759_0                            | 31  | e3 ubiquitin-protein ligase rnf185-like isoform x2         | 254 | 1.87E-88  | 81.00% | 0.103   | IPR001841 (SMART); PF13923 (PFAM); IPR013083 (G3DSA:3.30.40.GENE3D); PTHR12313 (PANTHER); PTHR12313:SF3 (PANTHER); IPR017907 (PROSITE_PATTERNS); TRANSMEMBRANE (PHOBIUS); CYTOPLASMIC_DOMAIN (PHOBIUS); NON_CYTOPLASMIC_DOMAIN (PHOBIUS); TRANSMEMBRANE (PHOBIUS); CYTOPLASMIC_DOMAIN (PHOBIUS); IPR001841 (PROSITE_PROFILES); SSF57850 (SUPERFAMILY); TMhelix (TMHMM); TMhelix (TMHMM)                |
| 926 | c19831_g1_i1_len_1557_path_1535_0_370_1_906_371_1556_0         | 45  | ---NA---                                                   | 519 |           |        | 0.1     | Coil (COILS); Coil (COILS)                                                                                                                                                                                                                                                                                         |
| 927 | c20132_g1_i1_len_1969_path_53_0_1968_1                         | 194 | cytochrome p450 partial                                    | 642 | 8.86E-113 | 55.30% | 0.186   | IPR001128 (PRINTS); IPR002401 (PRINTS); IPR001128 (G3DSA:1.10.630.GENE3D); IPR001128 (PFAM); PTHR24292 (PANTHER); PTHR24292:SF24 (PANTHER); IPR017972 (PROSITE_PATTERNS); NON_CYTOPLASMIC_DOMAIN (PHOBIUS); NON_CYTOPLASMIC_DOMAIN (PHOBIUS); TRANSMEMBRANE (PHOBIUS); TRANSMEMBRANE (PHOBIUS); CYTOPLASMIC_DOMAIN (PHOBIUS); IPR001128 (SUPERFAMILY); TMhelix (TMHMM)                                 |
| 928 | c20175_g2_i1_len_636_path_539_0_635_5                          | 30  | hyaluronan and proteoglycan link protein 1-like isoform x1 | 212 | 1.06E-20  | 56.30% | 0.101   | IPR002172 (PRINTS); IPR002172 (SMART); IPR002172 (G3DSA:4.10.400.GENE3D); IPR002172 (PFAM); IPR002172 (G3DSA:4.10.400.GENE3D); PTHR10529:SF208 (PANTHER); PTHR10529 (PANTHER); IPR002172 (PROSITE_PROFILES); IPR002172 (PROSITE_PROFILES); IPR002172 (SUPERFAMILY); IPR002172 (SUPERFAMILY); IPR002172 (SUPERFAMILY)                                                                                   |
| 929 | c20209_g1_i1_len_855_path_833_0_695_152_9_696_854_5            | 23  | ankyrin repeat and sam domain-containing protein 6-like    | 285 | 2.39E-72  | 60.10% | 0.609Y  | IPR002110 (PRINTS); IPR002110 (SMART); IPR020683 (G3DSA:1.25.40.GENE3D); IPR002110 (PFAM); IPR020683 (PFAM); IPR020683 (G3DSA:1.25.40.GENE3D); PTHR10627:SF2 (PANTHER); PTHR10627 (PANTHER); IPR002110 (PROSITE_PROFILES); IPR002110 (PROSITE_PROFILES); IPR002110 (PROSITE_PROFILES); IPR002110 (PROSITE_PROFILES); IPR002110 (PROSITE_PROFILES); SignalP-noTM (SIGNALP_EUK); IPR020683 (SUPERFAMILY) |
| 930 | c20209_g1_i2_len_733_path_833_0_695_168_8_696_732_3            | 18  | ankyrin repeat and sam domain-containing protein 6         | 245 | 2.33E-64  | 61.50% | 0.101   | IPR002110 (PRINTS); IPR002110 (SMART); IPR020683 (PFAM); IPR020683 (G3DSA:1.25.40.GENE3D); IPR020683 (G3DSA:1.25.40.GENE3D); PTHR10627:SF2 (PANTHER); PTHR10627 (PANTHER); IPR002110 (PROSITE_PROFILES); IPR020683 (PROSITE_PROFILES); IPR002110 (PROSITE_PROFILES); IPR002110 (PROSITE_PROFILES); IPR002110 (PROSITE_PROFILES); IPR002110 (PROSITE_PROFILES); IPR020683 (SUPERFAMILY)                 |
| 931 | c2026_g1_i1_len_1403_path_1_0_1402_1                           | 149 | uncharacterized oxidoreductase yrbe-like                   | 468 | 5.78E-142 | 68.50% | 0.127   | IPR000683 (PFAM); IPR004104 (PFAM); G3DSA:3.30.360.10 (GENE3D); IPR016040 (G3DSA:3.40.50.GENE3D); PTHR22604 (PANTHER); PTHR22604:SF92 (PANTHER); SSF55347 (SUPERFAMILY); SSF51735 (SUPERFAMILY)                                                                                                                                                                                                        |
| 932 | c20281_g1_i1_len_817_path_53_0_816_5                           | 22  | spermatogenesis-associated protein 5                       | 272 | 2.63E-59  | 79.40% | 0.143   | Coil (COILS); G3DSA:1.10.8.60 (GENE3D); IPR003959 (PFAM); IPR027417 (G3DSA:3.40.50.GENE3D); PTHR23077 (PANTHER); PTHR23077:SF27 (PANTHER); IPR003960 (PROSITE_PATTERNS); NON_CYTOPLASMIC_DOMAIN (PHOBIUS); TRANSMEMBRANE (PHOBIUS); CYTOPLASMIC_DOMAIN (PHOBIUS); TRANSMEMBRANE (PHOBIUS); CYTOPLASMIC_DOMAIN (PHOBIUS); IPR027417 (SUPERFAMILY); TMhelix (TMHMM)                                      |
| 933 | c20322_g1_i1_len_803_path_814_0_409_161_1_410_802_2            | 28  | hypothetical protein YQE_04199, partial                    | 267 | 1.43E-54  | 59.70% | 0.358 Y | IPR004947 (PFAM); IPR004947 (PANTHER)                                                                                                                                                                                                                                                                                                                                                                  |
| 934 | c20322_g1_i2_len_409_path_1609_0_15_161_1_16_408_1             | 6   | deoxyribonuclease- partial                                 | 136 | 3.42E-16  | 66.80% | 0.106   | IPR004947 (PFAM); IPR004947 (PANTHER)                                                                                                                                                                                                                                                                                                                                                                  |
| 935 | c20395_g1_i1_len_615_path_755_0_192_111_0_193_614_0            | 57  | peptidyl-prolyl cis-trans isomerase-like 3                 | 205 | 3.72E-46  | 59.60% | 0.144   | IPR002130 (PFAM); IPR029000 (G3DSA:2.40.100.GENE3D); IPR024936 (PANTHER); IPR002130 (PROSITE_PROFILES); IPR029000 (SUPERFAMILY)                                                                                                                                                                                                                                                                        |
| 936 | c20395_g1_i2_len_777_path_755_0_192_948_193_354_1110_355_776_0 | 91  | peptidyl-prolyl cis-trans isomerase-like 3                 | 259 | 2.44E-97  | 91.00% | 0.145   | IPR002130 (PRINTS); IPR029000 (G3DSA:2.40.100.GENE3D); IPR002130 (PFAM); IPR024936 (PANTHER); IPR020892 (PROSITE_PATTERNS); IPR002130 (PROSITE_PROFILES); IPR029000 (SUPERFAMILY)                                                                                                                                                                                                                      |
| 937 | c20460_g1_i1_len_2117_path_2197_0_1840_52_1841_2116_1          | 287 | lamin dm0-like isoform x1                                  | 706 | 0         | 75.60% | 0.325   | Coil (COILS); Coil (COILS); Coil (COILS); Coil (COILS); Coil (COILS); IPR001322 (G3DSA:2.60.40.GENE3D); IPR001322 (PFAM); G3DSA:1.20.5.170 (GENE3D); IPR001664 (PFAM); IPR027696 (PTHR23239:PANTHER); IPR001664 (PANTHER); IPR018039 (PROSITE_PATTERNS); SignalP-TM (SIGNALP_GRAM_POSITIVE); SSF64593 (SUPERFAMILY); IPR001322 (SUPERFAMILY); SSF64593 (SUPERFAMILY)                                   |

|     |                                                                    |     |                                                           |     |           |        |        |                                                                                                                                                                                                                                                                                                                                                                                                     |
|-----|--------------------------------------------------------------------|-----|-----------------------------------------------------------|-----|-----------|--------|--------|-----------------------------------------------------------------------------------------------------------------------------------------------------------------------------------------------------------------------------------------------------------------------------------------------------------------------------------------------------------------------------------------------------|
| 938 | c20460_g1_i2_len_2147_path_2197_0_1840_22_1841_1870_52_1871_2146_1 | 265 | lamin dm0-like isoform x1                                 | 716 | 0         | 74.60% | 0.325  | Coil (COILS); Coil (COILS); Coil (COILS); Coil (COILS); Coil (COILS); G3DSA:1.20.5.170 (GENE3D); IPR001322 (G3DSA:2.60.40.GENE3D); IPR001322 (PFAM); IPR001664 (PFAM); IPR027696 (PTHR23239:PANTHER); IPR001664 (PANTHER); IPR018039 (PROSITE_PATTERNS); SignalP-TM (SIGNALP_GRAM_POSITIVE); SSF64593 (SUPERFAMILY); SSF64593 (SUPERFAMILY); IPR001322 (SUPERFAMILY)                                |
| 939 | c20479_g1_i1_len_1314_path_1292_0_257_1_550_258_1313_1             | 230 | inactive hydroxysteroid dehydrogenase-like protein 1      | 438 | 6.92E-110 | 68.10% | 0.179  | Coil (COILS); IPR002198 (PRINTS); IPR002347 (PRINTS); IPR002198 (PFAM); IPR016040 (G3DSA:3.40.50.GENE3D); PTHR24316 (PANTHER); PTHR24316:SF317 (PANTHER); IPR020904 (PROSITE_PATTERNS); SSF51735 (SUPERFAMILY)                                                                                                                                                                                      |
| 940 | c20479_g1_i2_len_1078_path_2605_0_21_15_50_22_1077_2               | 212 | inactive hydroxysteroid dehydrogenase-like protein 1      | 359 | 2.71E-97  | 72.00% | 0.116  | Coil (COILS); IPR002347 (PRINTS); IPR002198 (PRINTS); IPR002198 (PFAM); IPR016040 (G3DSA:3.40.50.GENE3D); PTHR24316:SF317 (PANTHER); PTHR24316 (PANTHER); IPR020904 (PROSITE_PATTERNS); SSF51735 (SUPERFAMILY)                                                                                                                                                                                      |
| 941 | c20493_g1_i1_len_962_path_940_0_961_5                              | 72  | insulin-like growth factor binding protein 7-like protein | 320 | 7.92E-09  | 51.00% | 0.494Y | IPR000867 (SMART); IPR000867 (PFAM); IPR011390 (PANTHER); PTHR14186:SF8 (PANTHER); NON_CYTOPLASMIC_DOMAIN (PHOBIUS); TRANSMEMBRANE (PHOBIUS); CYTOPLASMIC_DOMAIN (PHOBIUS); IPR000867 (PROSITE_PROFILES); SignalP-noTM (SIGNALP_EUK); IPR009030 (SUPERFAMILY); TMhelix (TMHMM)                                                                                                                      |
| 942 | c20515_g1_i1_len_635_path_1581_0_634_1                             | 15  | laminin subunit gamma-1                                   | 212 | 1.87E-94  | 76.20% | 0.115  | IPR018031 (SMART); IPR000034 (PFAM); G3DSA:2.10.25.10 (GENE3D); PTHR10574 (PANTHER); PTHR10574:SF231 (PANTHER); IPR002049 (PROSITE_PATTERNS); IPR000034 (PROSITE_PROFILES); SSF57196 (SUPERFAMILY)                                                                                                                                                                                                  |
| 943 | c20515_g2_i1_len_507_path_485_0_506_2                              | 10  | lanb2                                                     | 169 | 5.47E-88  | 82.80% | 0.106  | IPR002049 (SMART); IPR000742 (SMART); IPR002049 (PFAM); G3DSA:2.10.25.10 (GENE3D); G3DSA:2.10.25.10 (GENE3D); PTHR10574:SF231 (PANTHER); PTHR10574 (PANTHER); IPR002049 (PROSITE_PATTERNS); IPR002049 (PROSITE_PATTERNS); IPR013032 (PROSITE_PATTERNS); IPR002049 (PROSITE_PATTERNS); IPR002049 (PROSITE_PROFILES); IPR002049 (PROSITE_PROFILES); SSF57196 (SUPERFAMILY); IPR009030 (SUPERFAMILY)   |
| 944 | c20591_g2_i1_len_328_path_306_0_327_4                              | 5   | peripheral plasma membrane protein cask-like              | 109 | 2.76E-59  | 96.50% | 0.101  | G3DSA:3.30.200.20 (GENE3D); IPR000719 (PFAM); PTHR23122:SF40 (PANTHER); PTHR23122 (PANTHER); IPR000719 (PROSITE_PROFILES); IPR011009 (SUPERFAMILY)                                                                                                                                                                                                                                                  |
| 945 | c20647_g1_i1_len_565_path_1_0_246_248_2_47_308_310_309_564_0       | 19  | lysosomal pro-x carboxypeptidase-like                     | 189 | 3.06E-54  | 75.40% | 0.142  | IPR008758 (PFAM); PTHR11010:SF11 (PANTHER); IPR008758 (PANTHER); CYTOPLASMIC_DOMAIN (PHOBIUS); NON_CYTOPLASMIC_DOMAIN (PHOBIUS); TRANSMEMBRANE (PHOBIUS); IPR029058 (SUPERFAMILY)                                                                                                                                                                                                                   |
| 946 | c20701_g1_i1_len_787_path_104_0_93_923_94_786_3                    | 30  | astacin- partial                                          | 263 | 6.48E-42  | 59.90% | 0.124  | IPR001506 (PRINTS); IPR006026 (SMART); IPR001506 (PFAM); IPR024079 (G3DSA:3.40.390.GENE3D); PTHR10127 (PANTHER); SSF55486 (SUPERFAMILY)                                                                                                                                                                                                                                                             |
| 947 | c20914_g1_i1_len_372_path_1_0_371_3                                | 6   | leucine-rich repeat-containing protein 47-like            | 124 | 1.81E-30  | 67.90% | 0.113  | IPR003591 (SMART); SM00364 (SMART); IPR001611 (PFAM); G3DSA:3.80.10.10 (GENE3D); PTHR10947:SF2 (PANTHER); PTHR10947 (PANTHER); IPR001611 (PROSITE_PROFILES); IPR001611 (PROSITE_PROFILES); IPR001611 (PROSITE_PROFILES); IPR001611 (PROSITE_PROFILES); SSF52058 (SUPERFAMILY)                                                                                                                       |
| 948 | c2095_g1_i1_len_357_path_1_0_356_5                                 | 4   | zinc finger protein 431-like isoform x1                   | 119 | 3.57E-39  | 72.80% | 0.116  | IPR015880 (SMART); IPR013087 (G3DSA:3.30.160.GENE3D); IPR013087 (G3DSA:3.30.160.GENE3D); IPR013087 (G3DSA:3.30.160.GENE3D); PF13465 (PFAM); PTHR24409 (PANTHER); IPR007087 (PROSITE_PATTERNS); IPR007087 (PROSITE_PATTERNS); IPR007087 (PROSITE_PROFILES); IPR007087 (PROSITE_PROFILES); IPR007087 (PROSITE_PROFILES); IPR007087 (PROSITE_PROFILES); SSF57667 (SUPERFAMILY); SSF57667 (SUPERFAMILY) |
| 949 | c2095_g2_i1_len_164_path_669_0_163_1                               | 3   | zinc finger protein 596-like                              | 55  | 9.14E-15  | 74.30% | 0.113  | IPR015880 (SMART); IPR013087 (G3DSA:3.30.160.GENE3D); PF13465 (PFAM); IPR013087 (G3DSA:3.30.160.GENE3D); PTHR24409 (PANTHER); IPR007087 (PROSITE_PATTERNS); IPR007087 (PROSITE_PROFILES); SSF57667 (SUPERFAMILY)                                                                                                                                                                                    |
| 950 | c20998_g1_i1_len_1177_path_1155_0_1176_1                           | 44  | ankyrin repeat protein                                    | 392 | 2.98E-18  | 49.80% | 0.103  | IPR002110 (SMART); IPR020683 (G3DSA:1.25.40.GENE3D); IPR020683 (PFAM); IPR020683 (G3DSA:1.25.40.GENE3D); PTHR24198 (PANTHER); IPR002110 (PROSITE_PROFILES); IPR020683 (PROSITE_PROFILES); IPR020683 (SUPERFAMILY)                                                                                                                                                                                   |



|     |                                          |     |                                                               |     |           |        |        |                                                                                                                                                                                                                                                                                                                                                                                                                                                                                                                                                                        |
|-----|------------------------------------------|-----|---------------------------------------------------------------|-----|-----------|--------|--------|------------------------------------------------------------------------------------------------------------------------------------------------------------------------------------------------------------------------------------------------------------------------------------------------------------------------------------------------------------------------------------------------------------------------------------------------------------------------------------------------------------------------------------------------------------------------|
| 962 | c21662_g1_i1_len_1292_path_1270_0_1291_2 | 37  | hemacentin- partial                                           | 430 | 5.10E-142 | 62.40% | 0.129  | IPR001881 (SMART); IPR000742 (SMART); IPR001881 (PFAM); IPR026823 (PFAM); G3DSA:2.10.25.10 (GENE3D); G3DSA:2.10.25.10 (GENE3D); G3DSA:2.10.25.10 (GENE3D); PTHR19897:SF158 (PANTHER); PTHR19897 (PANTHER); IPR013032 (PROSITE_PATTERNS); IPR000152 (PROSITE_PATTERNS); IPR018097 (PROSITE_PATTERNS); IPR000152 (PROSITE_PATTERNS); IPR018097 (PROSITE_PATTERNS); IPR013032 (PROSITE_PATTERNS); IPR018097 (PROSITE_PATTERNS); IPR000742 (PROSITE_PROFILES); IPR000742 (PROSITE_PROFILES); IPR000742 (PROSITE_PROFILES); SSF57196 (SUPERFAMILY); IPR009030 (SUPERFAMILY) |
| 963 | c21665_g1_i1_len_578_path_1_0_577_5      | 26  | vascular cell adhesion protein 1                              | 192 | 3.62E-65  | 66.30% | 0.128  | IPR003599 (SMART); IPR013783 (G3DSA:2.60.40.GENE3D); IPR013783 (G3DSA:2.60.40.GENE3D); PF13895 (PFAM); PTHR11640:SF6 (PANTHER); PTHR11640 (PANTHER); IPR007110 (PROSITE_PROFILES); SSF48726 (SUPERFAMILY); SSF48726 (SUPERFAMILY)                                                                                                                                                                                                                                                                                                                                      |
| 964 | c21702_g1_i1_len_388_path_1_0_387_2      | 4   | polypeptide n-acetylgalactosaminyltransferase 5 isoform x1    | 129 | 4.11E-77  | 94.20% | 0.223  | IPR001173 (PFAM); IPR029044 (G3DSA:3.90.550.GENE3D); PTHR11675 (PANTHER); PTHR11675:SF19 (PANTHER); IPR029044 (SUPERFAMILY)                                                                                                                                                                                                                                                                                                                                                                                                                                            |
| 965 | c21702_g2_i1_len_167_path_875_0_166_1    | 2   | polypeptide n-acetylgalactosaminyltransferase 5 isoform x2    | 56  | 1.62E-29  | 94.40% | 0.19   | PTHR11675 (PANTHER); PTHR11675:SF21 (PANTHER); IPR029044 (SUPERFAMILY)                                                                                                                                                                                                                                                                                                                                                                                                                                                                                                 |
| 966 | c21745_g1_i1_len_1940_path_53_0_1939_4   | 82  | vascular endothelial growth factor receptor 1-like isoform x1 | 647 | 1.19E-149 | 59.40% | 0.168  | Coil (COILS); G3DSA:3.30.200.20 (GENE3D); G3DSA:1.10.510.10 (GENE3D); IPR001245 (PFAM); PTHR24416:SF298 (PANTHER); PTHR24416 (PANTHER); IPR008266 (PROSITE_PATTERNS); IPR000719 (PROSITE_PROFILES); IPR011009 (SUPERFAMILY)                                                                                                                                                                                                                                                                                                                                            |
| 967 | c21765_g1_i1_len_2008_path_1986_0_2007_1 | 104 | serine-threonine kinase receptor-associated protein           | 669 | 0         | 85.50% | 0.114  | IPR001680 (SMART); IPR015943 (G3DSA:2.130.10.GENE3D); IPR001680 (PFAM); PTHR19877 (PANTHER); IPR019775 (PROSITE_PATTERNS); TRANSMEMBRANE (PHOBIUS); TRANSMEMBRANE (PHOBIUS); NON_CYTOPLASMIC_DOMAIN (PHOBIUS); CYTOPLASMIC_DOMAIN (PHOBIUS); CYTOPLASMIC_DOMAIN (PHOBIUS); TRANSMEMBRANE (PHOBIUS); NON_CYTOPLASMIC_DOMAIN (PHOBIUS); IPR001680 (PROSITE_PROFILES); IPR001680 (PROSITE_PROFILES); IPR017986 (PROSITE_PROFILES); IPR001680 (PROSITE_PROFILES); IPR001680 (PROSITE_PROFILES); IPR017986 (SUPERFAMILY); TMhelix (TMHMM); TMhelix (TMHMM)                  |
| 968 | c21792_g1_i1_len_552_path_1_0_551_0      | 12  | matrix metalloproteinase-9                                    | 184 | 2.17E-10  | 45.30% | 0.108  | IPR000562 (SMART); IPR000562 (PFAM); IPR000562 (G3DSA:2.10.10.GENE3D); IPR000562 (PROSITE_PROFILES); IPR000562 (PROSITE_PROFILES); IPR013806 (SUPERFAMILY); IPR013806 (SUPERFAMILY)                                                                                                                                                                                                                                                                                                                                                                                    |
| 969 | c21915_g1_i1_len_957_path_935_0_956_3    | 68  | membrane glycoprotein lig-                                    | 319 | 1.64E-17  | 46.00% | 0.797Y | IPR003591 (SMART); G3DSA:3.80.10.10 (GENE3D); IPR001611 (PFAM); PTHR24365 (PANTHER); NON_CYTOPLASMIC_DOMAIN (PHOBIUS); SIGNAL_PEPTIDE_C_REGION (PHOBIUS); SIGNAL_PEPTIDE_N_REGION (PHOBIUS); SIGNAL_PEPTIDE (PHOBIUS); SIGNAL_PEPTIDE_H_REGION (PHOBIUS); IPR001611 (PROSITE_PROFILES); IPR001611 (PROSITE_PROFILES); IPR001611 (PROSITE_PROFILES); IPR001611 (PROSITE_PROFILES); SignalP-noTM (SIGNALP_EUK); SSF52058 (SUPERFAMILY)                                                                                                                                   |
| 970 | c21992_g1_i1_len_1425_path_51_0_1424_0   | 236 | acyl- delta desaturase                                        | 475 | 1.80E-129 | 71.50% | 0.355Y | IPR015876 (PRINTS); IPR005804 (PFAM); PTHR11351:SF28 (PANTHER); PTHR11351 (PANTHER); CYTOPLASMIC_DOMAIN (PHOBIUS); NON_CYTOPLASMIC_DOMAIN (PHOBIUS); TRANSMEMBRANE (PHOBIUS); CYTOPLASMIC_DOMAIN (PHOBIUS); TRANSMEMBRANE (PHOBIUS); TRANSMEMBRANE (PHOBIUS); CYTOPLASMIC_DOMAIN (PHOBIUS); TRANSMEMBRANE (PHOBIUS); NON_CYTOPLASMIC_DOMAIN (PHOBIUS); TMhelix (TMHMM); TMhelix (TMHMM); TMhelix (TMHMM); TMhelix (TMHMM); TMhelix (TMHMM)                                                                                                                             |
| 971 | c22000_g1_i1_len_355_path_383_0_354_2    | 66  | nidogen-2- partial                                            | 118 | 6.03E-08  | 71.10% | 0.116  | IPR000716 (SMART); IPR000716 (PFAM); IPR000716 (G3DSA:4.10.800.GENE3D); IPR000716 (PROSITE_PATTERNS); IPR000716 (PROSITE_PROFILES); IPR000716 (SUPERFAMILY)                                                                                                                                                                                                                                                                                                                                                                                                            |



|     |                                                               |       |                                                                                                            |      |           |        |       |                                                                                                                                                                                                                                                                                                                                                                                                                                                                                                                                                                                                                                                                                                                                                                                                                                                                                                                                                                                                                                                                 |
|-----|---------------------------------------------------------------|-------|------------------------------------------------------------------------------------------------------------|------|-----------|--------|-------|-----------------------------------------------------------------------------------------------------------------------------------------------------------------------------------------------------------------------------------------------------------------------------------------------------------------------------------------------------------------------------------------------------------------------------------------------------------------------------------------------------------------------------------------------------------------------------------------------------------------------------------------------------------------------------------------------------------------------------------------------------------------------------------------------------------------------------------------------------------------------------------------------------------------------------------------------------------------------------------------------------------------------------------------------------------------|
| 972 | c22032_g1_i1_len_4008_path_31_0_4007_3                        | 45688 | ligand of numb protein x 2 isoform x1                                                                      | 1336 | 1.41E-177 | 53.00% | 0.106 | IPR001841 (SMART); IPR001478 (SMART); PF02176 (PFAM); IPR001478 (G3DSA:2.30.42.GENE3D); IPR001478 (G3DSA:2.30.42.GENE3D); IPR001478 (G3DSA:2.30.42.GENE3D); IPR013323 (G3DSA:3.90.890.GENE3D); IPR001478 (PFAM); IPR013083 (G3DSA:3.30.40.GENE3D); PF13920 (PFAM); PTHR19964 (PANTHER); IPR017907 (PROSITE_PATTERNS); CYTOPLASMIC_DOMAIN (PHOBIUS); TRANSMEMBRANE (PHOBIUS); TRANSMEMBRANE (PHOBIUS); CYTOPLASMIC_DOMAIN (PHOBIUS); TRANSMEMBRANE (PHOBIUS); TRANSMEMBRANE (PHOBIUS); NON_CYTOPLASMIC_DOMAIN (PHOBIUS); TRANSMEMBRANE (PHOBIUS); NON_CYTOPLASMIC_DOMAIN (PHOBIUS); NON_CYTOPLASMIC_DOMAIN (PHOBIUS); CYTOPLASMIC_DOMAIN (PHOBIUS); IPR001478 (PROSITE_PROFILES); IPR001478 (PROSITE_PROFILES); IPR001478 (PROSITE_PROFILES); IPR001841 (PROSITE_PROFILES); IPR001293 (PROSITE_PROFILES); IPR001478 (PROSITE_PROFILES); IPR001478 (SUPERFAMILY); IPR008974 (SUPERFAMILY); IPR001478 (SUPERFAMILY); IPR001478 (SUPERFAMILY); IPR001478 (SUPERFAMILY); SSF57850 (SUPERFAMILY); TMhelix (TMHMM); TMhelix (TMHMM); TMhelix (TMHMM); TMhelix (TMHMM); |
| 973 | c22068_g1_i1_len_622_path_1_0_621_2                           | 25    | maguk p55 subfamily member 7 isoform x4                                                                    | 207  | 1.55E-99  | 86.60% | 0.1   | IPR008145 (SMART); IPR027417 (G3DSA:3.40.50.GENE3D); IPR008145 (PFAM); G3DSA:3.30.63.10 (GENE3D); PTHR23122 (PANTHER); PTHR23122:SF14 (PANTHER); IPR020590 (PROSITE_PATTERNS); IPR008144 (PROSITE_PROFILES); IPR027417 (SUPERFAMILY)                                                                                                                                                                                                                                                                                                                                                                                                                                                                                                                                                                                                                                                                                                                                                                                                                            |
| 974 | c22073_g1_i1_len_1334_path_2921_0_17_15_9_18_1333_5           | 37    | camp-dependent protein kinase catalytic                                                                    | 444  | 0         | 90.60% | 0.1   | Coil (COILS); IPR000239 (PRINTS); IPR000961 (SMART); G3DSA:3.30.200.20 (GENE3D); G3DSA:1.10.510.10 (GENE3D); IPR000719 (PFAM); PTHR24355 (PANTHER); PTHR24355:SF24 (PANTHER); IPR017441 (PROSITE_PATTERNS); IPR000961 (PROSITE_PROFILES); IPR000719 (PROSITE_PROFILES); IPR016137 (PROSITE_PROFILES); IPR011009 (SUPERFAMILY); IPR016137 (SUPERFAMILY)                                                                                                                                                                                                                                                                                                                                                                                                                                                                                                                                                                                                                                                                                                          |
| 975 | c22073_g1_i2_len_1474_path_1_0_157_159_158_1473_5             | 40    | camp-dependent protein kinase catalytic                                                                    | 491  | 0         | 90.20% | 0.1   | Coil (COILS); IPR000239 (PRINTS); IPR000961 (SMART); G3DSA:3.30.200.20 (GENE3D); IPR000719 (PFAM); G3DSA:1.10.510.10 (GENE3D); PTHR24355 (PANTHER); PTHR24355:SF24 (PANTHER); IPR017441 (PROSITE_PATTERNS); IPR000719 (PROSITE_PROFILES); IPR000961 (PROSITE_PROFILES); IPR016137 (PROSITE_PROFILES); IPR016137 (SUPERFAMILY); IPR011009 (SUPERFAMILY)                                                                                                                                                                                                                                                                                                                                                                                                                                                                                                                                                                                                                                                                                                          |
| 976 | c22403_g1_i1_len_795_path_1509_0_794_2                        | 30    | mucin 17-like partial                                                                                      | 265  | 3.05E-27  | 45.50% | 0.123 | PTHR24023 (PANTHER); PTHR24023:SF405 (PANTHER)                                                                                                                                                                                                                                                                                                                                                                                                                                                                                                                                                                                                                                                                                                                                                                                                                                                                                                                                                                                                                  |
| 977 | c22403_g1_i1_len_795_path_1509_0_794_5                        | 30    | collagen alpha-1 chain                                                                                     | 265  | 1.71E-67  | 68.90% | 0.106 | IPR008160 (PFAM); PTHR24023:SF164 (PANTHER); PTHR24023 (PANTHER)                                                                                                                                                                                                                                                                                                                                                                                                                                                                                                                                                                                                                                                                                                                                                                                                                                                                                                                                                                                                |
| 978 | c22472_g1_i1_len_334_path_1_0_333_2                           | 3     | zinc finger protein 177-like                                                                               | 111  | 3.14E-31  | 76.50% | 0.204 | IPR015880 (SMART); PF13912 (PFAM); IPR013087 (G3DSA:3.30.160.GENE3D); IPR013087 (G3DSA:3.30.160.GENE3D); PF13465 (PFAM); PTHR24409 (PANTHER); IPR007087 (PROSITE_PATTERNS); IPR007087 (PROSITE_PROFILES); IPR007087 (PROSITE_PROFILES); SSF57667 (SUPERFAMILY)                                                                                                                                                                                                                                                                                                                                                                                                                                                                                                                                                                                                                                                                                                                                                                                                  |
| 979 | c22472_g2_i1_len_150_path_623_0_149_5                         | 2     | zinc finger protein                                                                                        | 50   | 1.97E-25  | 95.20% | 0.13  | IPR015880 (SMART); PF13465 (PFAM); IPR013087 (G3DSA:3.30.160.GENE3D); PTHR24409 (PANTHER); IPR007087 (PROSITE_PATTERNS); IPR007087 (PROSITE_PROFILES); SSF57667 (SUPERFAMILY)                                                                                                                                                                                                                                                                                                                                                                                                                                                                                                                                                                                                                                                                                                                                                                                                                                                                                   |
| 980 | c22477_g2_i1_len_268_path_1_0_179_181_1_80_203_1506_204_267_3 | 5     | zinc finger protein                                                                                        | 90   | 2.00E-15  | 58.80% | 0.1   | IPR015880 (SMART); IPR013087 (G3DSA:3.30.160.GENE3D); PF13465 (PFAM); IPR007087 (PFAM); IPR013087 (G3DSA:3.30.160.GENE3D); PTHR24409 (PANTHER); PTHR24409:SF14 (PANTHER); IPR007087 (PROSITE_PATTERNS); IPR007087 (PROSITE_PATTERNS); IPR007087 (PROSITE_PROFILES); IPR007087 (PROSITE_PROFILES); SSF57667 (SUPERFAMILY); SSF57667 (SUPERFAMILY)                                                                                                                                                                                                                                                                                                                                                                                                                                                                                                                                                                                                                                                                                                                |
| 981 | c22546_g1_i1_len_231_path_687_0_230_3                         | 6     | ---NA---                                                                                                   | 77   |           |        | 0.102 | G3DSA:2.60.40.1110 (GENE3D); IPR014020 (PFAM); IPR000008 (SUPERFAMILY)                                                                                                                                                                                                                                                                                                                                                                                                                                                                                                                                                                                                                                                                                                                                                                                                                                                                                                                                                                                          |
| 982 | c22546_g2_i1_len_262_path_1_0_261_5                           | 2     | phosphatidylinositol -trisphosphate 3-phosphatase and dual-specificity protein phosphatase pten isoform x4 | 87   | 2.74E-13  | 73.80% | 0.135 | G3DSA:2.60.40.1110 (GENE3D); IPR014020 (PFAM); IPR014020 (PROSITE_PROFILES); IPR000008 (SUPERFAMILY)                                                                                                                                                                                                                                                                                                                                                                                                                                                                                                                                                                                                                                                                                                                                                                                                                                                                                                                                                            |
| 983 | c22590_g1_i1_len_867_path_1_0_866_5                           | 24    | zinc finger protein 665 isoform x2                                                                         | 289  | 1.79E-11  | 64.10% | 0.098 | IPR015880 (SMART); PF13465 (PFAM); IPR013087 (G3DSA:3.30.160.GENE3D); IPR013087 (G3DSA:3.30.160.GENE3D); PTHR24409:SF13 (PANTHER); PTHR24409 (PANTHER); IPR007087 (PROSITE_PATTERNS); IPR007087 (PROSITE_PROFILES); IPR007087 (PROSITE_PROFILES); SSF57667 (SUPERFAMILY)                                                                                                                                                                                                                                                                                                                                                                                                                                                                                                                                                                                                                                                                                                                                                                                        |
| 984 | c22591_g1_i1_len_263_path_209_0_262_2                         | 3     | collagen alpha-1 partial                                                                                   | 87   | 6.90E-16  | 65.80% | 0.099 | IPR008160 (PFAM); PTHR24023:SF379 (PANTHER); PTHR24023 (PANTHER)                                                                                                                                                                                                                                                                                                                                                                                                                                                                                                                                                                                                                                                                                                                                                                                                                                                                                                                                                                                                |

|     |                                                        |     |                                                                                        |     |           |        |        |                                                                                                                                                                                                                                                                                                                                                                                                                                                                                                                                   |
|-----|--------------------------------------------------------|-----|----------------------------------------------------------------------------------------|-----|-----------|--------|--------|-----------------------------------------------------------------------------------------------------------------------------------------------------------------------------------------------------------------------------------------------------------------------------------------------------------------------------------------------------------------------------------------------------------------------------------------------------------------------------------------------------------------------------------|
| 985 | c22634_g1_i1_len_2549_path_1_0_2548_0                  | 171 | sulfhydryl oxidase 1-like                                                              | 850 | 5.62E-156 | 54.70% | 0.415Y | IPR017905 (G3DSA:1.20.120.GENE3D); IPR017905 (PFAM); IPR012336 (G3DSA:3.40.30.GENE3D); IPR013766 (PFAM); PTHR22897:SF8 (PANTHER); PTHR22897 (PANTHER); SIGNAL_PEPTIDE_H_REGION (PHOBIUS); CYTOPLASMIC_DOMAIN (PHOBIUS); SIGNAL_PEPTIDE (PHOBIUS); NON_CYTOPLASMIC_DOMAIN (PHOBIUS); SIGNAL_PEPTIDE_C_REGION (PHOBIUS); TRANSMEMBRANE (PHOBIUS); SIGNAL_PEPTIDE_N_REGION (PHOBIUS); IPR017905 (PROSITE_PROFILES); IPR012336 (PROSITE_PROFILES); IPR017905 (SUPERFAMILY); IPR012336 (SUPERFAMILY); TMhelix (TMHMM); TMhelix (TMHMM) |
| 986 | c22664_g1_i1_len_1787_path_2163_0_1786_1               | 112 | exocyst complex component 7                                                            | 596 | 0         | 70.60% | 0.102  | IPR004140 (PFAM); PTHR12542:SF7 (PANTHER); IPR004140 (PANTHER); IPR016159 (SUPERFAMILY)                                                                                                                                                                                                                                                                                                                                                                                                                                           |
| 987 | c22727_g1_i1_len_947_path_925_0_946_2                  | 29  | zinc finger and scan domain-containing protein 2-like isoform x1                       | 315 | 8.26E-48  | 51.80% | 0.12   | IPR015880 (SMART); IPR013087 (G3DSA:3.30.160.GENE3D); IPR013087 (G3DSA:3.30.160.GENE3D); PF13465 (PFAM); PTHR24409 (PANTHER); IPR007087 (PROSITE_PATTERNS); IPR007087 (PROSITE_PATTERNS); IPR007087 (PROSITE_PROFILES); IPR007087 (PROSITE_PROFILES); SSF57667 (SUPERFAMILY)                                                                                                                                                                                                                                                      |
| 988 | c22740_g1_i1_len_2472_path_3405_0_1277_532_1278_2471_5 | 272 | hydroxysteroid dehydrogenase-like protein 2                                            | 824 | 2.11E-163 | 76.40% | 0.131  | IPR002347 (PRINTS); IPR002198 (PFAM); IPR016040 (G3DSA:3.40.50.GENE3D); PTHR24322 (PANTHER); PTHR24322:SF273 (PANTHER); TRANSMEMBRANE (PHOBIUS); TRANSMEMBRANE (PHOBIUS); CYTOPLASMIC_DOMAIN (PHOBIUS); TRANSMEMBRANE (PHOBIUS); NON_CYTOPLASMIC_DOMAIN (PHOBIUS); CYTOPLASMIC_DOMAIN (PHOBIUS); NON_CYTOPLASMIC_DOMAIN (PHOBIUS); SSF51735 (SUPERFAMILY); TMhelix (TMHMM); TMhelix (TMHMM); TMhelix (TMHMM); TMhelix (TMHMM)                                                                                                     |
| 989 | c22740_g1_i2_len_1717_path_9_0_522_532_523_1716_5      | 314 | hydroxysteroid dehydrogenase-like protein 2                                            | 572 | 0         | 77.00% | 0.131  | IPR002347 (PRINTS); IPR003033 (PFAM); IPR003033 (G3DSA:3.30.1050.GENE3D); IPR002198 (PFAM); IPR016040 (G3DSA:3.40.50.GENE3D); PTHR24322:SF273 (PANTHER); PTHR24322 (PANTHER); IPR003033 (SUPERFAMILY); SSF51735 (SUPERFAMILY)                                                                                                                                                                                                                                                                                                     |
| 990 | c22757_g1_i1_len_850_path_828_0_849_0                  | 30  | syntaxin-1a isoform x2                                                                 | 284 | 0         | 93.10% | 0.104  | Coil (COILS); Coil (COILS); IPR000727 (SMART); IPR006011 (SMART); G3DSA:1.20.58.70 (GENE3D); G3DSA:1.20.5.110 (GENE3D); IPR000727 (PFAM); IPR006011 (PFAM); PTHR19957 (PANTHER); IPR028669 (PTHR19957:PANTHER); IPR006012 (PROSITE_PATTERNS); NON_CYTOPLASMIC_DOMAIN (PHOBIUS); TRANSMEMBRANE (PHOBIUS); CYTOPLASMIC_DOMAIN (PHOBIUS); IPR000727 (PROSITE_PROFILES); IPR010989 (SUPERFAMILY); TMhelix (TMHMM)                                                                                                                     |
| 991 | c22820_g1_i1_len_151_path_479_0_150_1                  | 1   | endothelin-converting enzyme 1 isoform x1                                              | 50  | 2.68E-18  | 86.90% | 0.156  | G3DSA:1.10.1380.10 (GENE3D); IPR008753 (PFAM); IPR000718 (PANTHER); IPR029734 (PTHR11733:PANTHER); SSF55486 (SUPERFAMILY)                                                                                                                                                                                                                                                                                                                                                                                                         |
| 992 | c22820_g2_i1_len_198_path_176_0_197_1                  | 1   | endothelin-converting enzyme 1 isoform x2                                              | 66  | 2.08E-23  | 87.80% | 0.105  | IPR000718 (PANTHER); IPR029733 (PTHR11733:PANTHER); SSF55486 (SUPERFAMILY)                                                                                                                                                                                                                                                                                                                                                                                                                                                        |
| 993 | c22877_g1_i1_len_925_path_903_0_756_166_0_757_924_3    | 93  | adp-ribosylation factor 6                                                              | 309 | 8.47E-124 | 99.30% | 0.535Y | IPR006689 (PRINTS); IPR006687 (SMART); IPR003579 (SMART); IPR024156 (SMART); IPR005225 (TIGRFAM); IPR006689 (PFAM); IPR027417 (G3DSA:3.40.50.GENE3D); PTHR11711 (PANTHER); PTHR11711:SF106 (PANTHER); IPR024156 (PROSITE_PROFILES); SignalP-noTM (SIGNALP_EUK); IPR027417 (SUPERFAMILY)                                                                                                                                                                                                                                           |
| 994 | c22888_g1_i1_len_742_path_720_0_741_5                  | 22  | achain crystal structure of engineered northeast structural genomics consortium target | 247 | 4.45E-15  | 58.40% | 0.097  | IPR002110 (SMART); IPR002110 (PFAM); IPR020683 (PFAM); IPR020683 (G3DSA:1.25.40.GENE3D); PTHR24198 (PANTHER); IPR002110 (PROSITE_PROFILES); IPR002110 (PROSITE_PROFILES); IPR020683 (PROSITE_PROFILES); IPR020683 (SUPERFAMILY)                                                                                                                                                                                                                                                                                                   |
| 995 | c22888_g2_i1_len_534_path_1439_0_533_1                 | 8   | ankyrin neuronal                                                                       | 178 | 1.25E-16  | 54.20% | 0.115  | IPR002110 (PRINTS); IPR002110 (SMART); IPR020683 (PFAM); IPR020683 (G3DSA:1.25.40.GENE3D); IPR002110 (PFAM); PTHR24198 (PANTHER); IPR002110 (PROSITE_PROFILES); IPR020683 (PROSITE_PROFILES); IPR002110 (PROSITE_PROFILES); IPR002110 (PROSITE_PROFILES); IPR002110 (PROSITE_PROFILES); IPR020683 (SUPERFAMILY); TMhelix (TMHMM)                                                                                                                                                                                                  |
| 996 | c22973_g1_i1_len_430_path_408_0_429_5                  | 13  | basement membrane-specific heparan sulfate proteoglycan core protein                   | 143 | 2.52E-48  | 70.40% | 0.12   | IPR002049 (SMART); G3DSA:2.10.25.10 (GENE3D); G3DSA:2.10.25.10 (GENE3D); IPR002049 (PFAM); G3DSA:2.10.25.10 (GENE3D); PTHR10574:SF252 (PANTHER); PTHR10574 (PANTHER); IPR013032 (PROSITE_PATTERNS); IPR002049 (PROSITE_PATTERNS); IPR002049 (PROSITE_PATTERNS); IPR013032 (PROSITE_PATTERNS); IPR002049 (PROSITE_PROFILES); IPR002049 (PROSITE_PROFILES); IPR002049 (PROSITE_PROFILES); SSF57196 (SUPERFAMILY); SSF57196 (SUPERFAMILY)                                                                                            |
| 997 | c22973_g2_i1_len_633_path_815_0_632_3                  | 28  | basement membrane-specific heparan sulfate proteoglycan core protein                   | 211 | 1.45E-76  | 72.00% | 0.108  | IPR018031 (SMART); IPR000034 (PFAM); PTHR10574 (PANTHER); PTHR10574:SF252 (PANTHER); IPR000034 (PROSITE_PROFILES)                                                                                                                                                                                                                                                                                                                                                                                                                 |

|      |                                                                        |     |                                                      |     |           |        |       |                                                                                                                                                                                                                                                                                                                                                                                                                                                                                                                                  |
|------|------------------------------------------------------------------------|-----|------------------------------------------------------|-----|-----------|--------|-------|----------------------------------------------------------------------------------------------------------------------------------------------------------------------------------------------------------------------------------------------------------------------------------------------------------------------------------------------------------------------------------------------------------------------------------------------------------------------------------------------------------------------------------|
| 998  | c23003_g1_i1_len_1161_path_1309_0_1075_2555_1076_1160_4                | 446 | peptidyl-prolyl cis-trans isomerase e                | 387 | 2.48E-122 | 81.30% | 0.105 | IPR002130 (PRINTS); IPR029000 (G3DSA:2.40.100.GENE3D); IPR002130 (PFAM); PTHR11071:SF242 (PANTHER); IPR024936 (PANTHER); IPR020892 (PROSITE_PATTERNS); IPR002130 (PROSITE_PROFILES); IPR029000 (SUPERFAMILY)                                                                                                                                                                                                                                                                                                                     |
| 999  | c23003_g1_i2_len_1331_path_1309_0_1075_2385_1076_1245_2555_1246_1330_3 | 704 | peptidyl-prolyl cis-trans isomerase e                | 444 | 1.06E-168 | 84.30% | 0.108 | IPR002130 (PRINTS); IPR000504 (SMART); IPR000504 (PFAM); IPR012677 (G3DSA:3.30.70.GENE3D); IPR002130 (PFAM); IPR029000 (G3DSA:2.40.100.GENE3D); IPR024936 (PANTHER); PTHR11071:SF242 (PANTHER); IPR020892 (PROSITE_PATTERNS); IPR002130 (PROSITE_PROFILES); IPR000504 (PROSITE_PROFILES); SSF54928 (SUPERFAMILY); IPR029000 (SUPERFAMILY)                                                                                                                                                                                        |
| 1000 | c23023_g1_i1_len_603_path_1_0_115_117_1_16_602_1                       | 19  | adrenodoxin-like mitochondrial                       | 201 | 7.65E-73  | 87.80% | 0.096 | IPR001055 (PRINTS); IPR001041 (PFAM); IPR012675 (G3DSA:3.10.20.GENE3D); PTHR23426:SF1 (PANTHER); PTHR23426 (PANTHER); IPR018298 (PROSITE_PATTERNS); IPR001041 (PROSITE_PROFILES); IPR001041 (SUPERFAMILY)                                                                                                                                                                                                                                                                                                                        |
| 1001 | c23023_g1_i2_len_655_path_866_0_167_117_168_654_2                      | 28  | adrenodoxin-like mitochondrial                       | 218 | 8.21E-77  | 84.70% | 0.191 | IPR001055 (PRINTS); IPR001041 (PFAM); IPR012675 (G3DSA:3.10.20.GENE3D); PTHR23426 (PANTHER); PTHR23426:SF1 (PANTHER); IPR018298 (PROSITE_PATTERNS); IPR001041 (PROSITE_PROFILES); IPR001041 (SUPERFAMILY)                                                                                                                                                                                                                                                                                                                        |
| 1002 | c23044_g1_i1_len_643_path_1_0_642_4                                    | 34  | carboxypeptidase d-like                              | 214 | 4.45E-37  | 52.30% | 0.148 | IPR014766 (G3DSA:2.60.40.GENE3D); PF13620 (PFAM); IPR000834 (PFAM); G3DSA:3.40.630.10 (GENE3D); PTHR11532 (PANTHER); PTHR11532:SF50 (PANTHER); IPR008969 (SUPERFAMILY); SSF53187 (SUPERFAMILY)                                                                                                                                                                                                                                                                                                                                   |
| 1003 | c23044_g2_i1_len_341_path_1241_0_340_3                                 | 6   | carboxypeptidase d-like                              | 114 | 2.59E-19  | 73.50% | 0.123 | IPR000834 (PFAM); G3DSA:3.40.630.10 (GENE3D); SSF53187 (SUPERFAMILY)                                                                                                                                                                                                                                                                                                                                                                                                                                                             |
| 1004 | c23063_g1_i1_len_732_path_789_0_477_44_478_731_3                       | 25  | low affinity immunoglobulin epsilon fc receptor-like | 244 | 9.36E-14  | 44.30% | 0.127 | IPR001304 (SMART); IPR016186 (G3DSA:3.10.100.GENE3D); IPR001304 (PFAM); PTHR22802 (PANTHER); IPR001304 (PROSITE_PROFILES); IPR016187 (SUPERFAMILY)                                                                                                                                                                                                                                                                                                                                                                               |
| 1005 | c23063_g1_i2_len_769_path_789_0_477_126_6_478_514_44_515_768_4         | 41  | low affinity immunoglobulin epsilon fc receptor-like | 256 | 2.78E-17  | 46.60% | 0.19  | IPR001304 (SMART); IPR016186 (G3DSA:3.10.100.GENE3D); IPR001304 (PFAM); PTHR22802 (PANTHER); NON_CYTOPLASMIC_DOMAIN (PHOBIUS); TRANSMEMBRANE (PHOBIUS); CYTOPLASMIC_DOMAIN (PHOBIUS); IPR001304 (PROSITE_PROFILES); IPR016187 (SUPERFAMILY); TMhelix (TMHMM)                                                                                                                                                                                                                                                                     |
| 1006 | c23067_g2_i1_len_2574_path_3998_0_2573_2                               | 186 | serine threonine-protein kinase warts                | 858 | 0         | 78.70% | 0.127 | IPR000961 (SMART); IPR002290 (SMART); G3DSA:3.30.200.20 (GENE3D); G3DSA:3.90.1200.10 (GENE3D); IPR000719 (PFAM); G3DSA:1.10.510.10 (GENE3D); IPR028741 (PTHR24356:PANTHER); PTHR24356 (PANTHER); IPR017441 (PROSITE_PATTERNS); IPR008271 (PROSITE_PATTERNS); NON_CYTOPLASMIC_DOMAIN (PHOBIUS); TRANSMEMBRANE (PHOBIUS); CYTOPLASMIC_DOMAIN (PHOBIUS); IPR000961 (PROSITE_PROFILES); IPR000719 (PROSITE_PROFILES); IPR011009 (SUPERFAMILY)                                                                                        |
| 1007 | c23104_g1_i1_len_317_path_1_0_316_3                                    | 10  | gamma-glutamyltranspeptidase 1                       | 106 | 1.39E-39  | 76.90% | 0.098 | IPR000101 (PRINTS); IPR000101 (PFAM); PTHR11686:SF15 (PANTHER); IPR000101 (PANTHER); IPR029055 (SUPERFAMILY)                                                                                                                                                                                                                                                                                                                                                                                                                     |
| 1008 | c23186_g2_i1_len_163_path_363_0_162_1                                  | 4   | peptidyl-prolyl cis-trans isomerase                  | 54  | 8.19E-23  | 88.20% | 0.139 | IPR002130 (PRINTS); IPR029000 (G3DSA:2.40.100.GENE3D); IPR002130 (PFAM); IPR024936 (PANTHER); IPR002130 (PROSITE_PROFILES); IPR029000 (SUPERFAMILY)                                                                                                                                                                                                                                                                                                                                                                              |
| 1009 | c23266_g1_i1_len_1186_path_1164_0_1185_2                               | 168 | thioredoxin-like protein 1                           | 395 | 1.41E-153 | 81.30% | 0.18  | PR00421 (PRINTS); IPR013766 (PFAM); IPR010400 (PFAM); IPR010400 (G3DSA:2.60.120.GENE3D); IPR012336 (G3DSA:3.40.30.GENE3D); IPR005746 (PANTHER); IPR017937 (PROSITE_PATTERNS); IPR010400 (PROSITE_PROFILES); IPR012336 (PROSITE_PROFILES); IPR008979 (SUPERFAMILY); IPR012336 (SUPERFAMILY)                                                                                                                                                                                                                                       |
| 1010 | c23341_g1_i1_len_529_path_1_0_528_2                                    | 14  | bifunctional protein ncoat isoform x2                | 176 | 4.73E-82  | 92.00% | 0.201 | IPR011496 (PFAM); PTHR13170 (PANTHER); PTHR13170:SF17 (PANTHER); IPR017853 (SUPERFAMILY)                                                                                                                                                                                                                                                                                                                                                                                                                                         |
| 1012 | c2357_g2_i1_len_558_path_536_0_557_1                                   | 16  | zinc finger protein 77-like                          | 186 | 1.55E-30  | 58.70% | 0.119 | IPR015880 (SMART); IPR013087 (G3DSA:3.30.160.GENE3D); IPR007087 (PFAM); PF13465 (PFAM); IPR013087 (G3DSA:3.30.160.GENE3D); PF13912 (PFAM); PF13894 (PFAM); PTHR24409 (PANTHER); PTHR24409:SF14 (PANTHER); IPR007087 (PROSITE_PATTERNS); IPR007087 (PROSITE_PATTERNS); IPR007087 (PROSITE_PATTERNS); IPR007087 (PROSITE_PATTERNS); IPR007087 (PROSITE_PROFILES); IPR007087 (PROSITE_PROFILES); IPR007087 (PROSITE_PROFILES); IPR007087 (PROSITE_PROFILES); SSF57667 (SUPERFAMILY); SSF57667 (SUPERFAMILY); SSF57667 (SUPERFAMILY) |
| 1011 | c23576_g1_i1_len_1423_path_53_0_1422_4                                 | 114 | hypothetical protein LOTGIDRAFT_228404               | 474 | 4.46E-06  | 53.00% | 0.119 | IPR000998 (SMART); IPR000998 (PFAM); NON_CYTOPLASMIC_DOMAIN (PHOBIUS); NON_CYTOPLASMIC_DOMAIN (PHOBIUS); TRANSMEMBRANE (PHOBIUS); TRANSMEMBRANE (PHOBIUS); CYTOPLASMIC_DOMAIN (PHOBIUS); IPR000998 (PROSITE_PROFILES); IPR013320 (SUPERFAMILY)                                                                                                                                                                                                                                                                                   |

|      |                                                                   |       |                                                 |      |           |        |        |                                                                                                                                                                                                                                                                                                                                                                                                                                                                                                                                                 |
|------|-------------------------------------------------------------------|-------|-------------------------------------------------|------|-----------|--------|--------|-------------------------------------------------------------------------------------------------------------------------------------------------------------------------------------------------------------------------------------------------------------------------------------------------------------------------------------------------------------------------------------------------------------------------------------------------------------------------------------------------------------------------------------------------|
| 1013 | c23600_g1_i1_len_245_path_1_0_97_99_98_244_2                      | 1     | beta- -n-acetylgalactosaminyltransferase bre-4  | 81   | 4.33E-27  | 70.00% | 0.103  | IPR003859 (PRINTS); IPR029044 (G3DSA:3.90.550.GENE3D); IPR027995 (PFAM); IPR003859 (PANTHER); IPR029044 (SUPERFAMILY)                                                                                                                                                                                                                                                                                                                                                                                                                           |
| 1014 | c23600_g1_i2_len_345_path_643_0_197_99_198_344_0                  | 4     | beta- -n-acetylgalactosaminyltransferase bre-4  | 115  | 4.83E-38  | 69.60% | 0.229  | IPR003859 (PRINTS); IPR027995 (PFAM); IPR029044 (G3DSA:3.90.550.GENE3D); IPR003859 (PANTHER); IPR029044 (SUPERFAMILY)                                                                                                                                                                                                                                                                                                                                                                                                                           |
| 1015 | c23661_g1_i1_len_984_path_1012_0_983_2                            | 87837 | ferritin 2                                      | 328  | 1.24E-73  | 80.40% | 0.202  | IPR008331 (PFAM); IPR012347 (G3DSA:1.20.1260.GENE3D); IPR001519 (PANTHER); IPR009040 (PROSITE_PROFILES); IPR009078 (SUPERFAMILY)                                                                                                                                                                                                                                                                                                                                                                                                                |
| 1016 | c23690_g1_i1_len_252_path_1_0_251_4                               | 4     | serine threonine-protein kinase tao1 isoform x1 | 84   | 1.46E-49  | 97.00% | 0.121  | IPR000719 (PFAM); G3DSA:1.10.510.10 (GENE3D); PTHR24361 (PANTHER); PTHR24361:SF259 (PANTHER); IPR000719 (PROSITE_PROFILES); IPR011009 (SUPERFAMILY)                                                                                                                                                                                                                                                                                                                                                                                             |
| 1017 | c23727_g2_i1_len_319_path_231_0_318_4                             | 5     | myosin heavy chain                              | 106  | 4.05E-61  | 99.00% | 0.119  | Coil (COILS); IPR002928 (PFAM); PTHR13140 (PANTHER); PTHR13140:SF332 (PANTHER)                                                                                                                                                                                                                                                                                                                                                                                                                                                                  |
| 1018 | c23980_g1_i1_len_514_path_1_0_513_4                               | 13    | bone morphogenetic protein 4-like               | 171  | 1.32E-17  | 62.00% | 0.139  | IPR001111 (PFAM); PTHR11848:SF146 (PANTHER); IPR015615 (PANTHER)                                                                                                                                                                                                                                                                                                                                                                                                                                                                                |
| 1019 | c23980_g2_i1_len_144_path_983_0_143_1                             | 1     | bone morphogenetic protein 2-like               | 48   | 1.04E-21  | 89.60% | 0.109  | IPR001839 (SMART); IPR001839 (PFAM); IPR029034 (G3DSA:2.10.90.GENE3D); PTHR11848:SF131 (PANTHER); IPR015615 (PANTHER); IPR017948 (PROSITE_PATTERNS); IPR001839 (PROSITE_PROFILES); IPR029034 (SUPERFAMILY)                                                                                                                                                                                                                                                                                                                                      |
| 1020 | c23997_g2_i1_len_271_path_249_0_270_5                             | 4     | adenylate cyclase type 8 isoform x1             | 90   | 9.57E-41  | 87.80% | 0.129  | IPR001054 (G3DSA:3.30.70.GENE3D); IPR001054 (PFAM); PTHR11920:SF236 (PANTHER); PTHR11920 (PANTHER); IPR018297 (PROSITE_PATTERNS); IPR001054 (PROSITE_PROFILES); IPR029787 (SUPERFAMILY)                                                                                                                                                                                                                                                                                                                                                         |
| 1021 | c24022_g1_i1_len_2078_path_1_0_2077_4                             | 104   | inactivation-no-after-potential d               | 693  | 9.96E-171 | 62.50% | 0.153  | IPR001478 (SMART); IPR001478 (G3DSA:2.30.42.GENE3D); IPR001478 (PFAM); IPR001478 (G3DSA:2.30.42.GENE3D); IPR001478 (G3DSA:2.30.42.GENE3D); PTHR19964:SF34 (PANTHER); PTHR19964 (PANTHER); TRANSMEMBRANE (PHOBIUS); CYTOPLASMIC_DOMAIN (PHOBIUS); TRANSMEMBRANE (PHOBIUS); NON_CYTOPLASMIC_DOMAIN (PHOBIUS); NON_CYTOPLASMIC_DOMAIN (PHOBIUS); IPR001478 (PROSITE_PROFILES); IPR001478 (PROSITE_PROFILES); IPR001478 (PROSITE_PROFILES); IPR001478 (PROSITE_PROFILES); IPR001478 (SUPERFAMILY); IPR001478 (SUPERFAMILY); IPR001478 (SUPERFAMILY) |
| 1022 | c24022_g2_i1_len_139_path_4111_0_138_4                            | 0     | inactivation-no-after-potential d               | 46   | 1.83E-15  | 84.90% | 0.112  | IPR001478 (G3DSA:2.30.42.GENE3D); IPR001478 (PFAM); PTHR19964:SF11 (PANTHER); PTHR19964 (PANTHER); IPR001478 (PROSITE_PROFILES); IPR001478 (SUPERFAMILY)                                                                                                                                                                                                                                                                                                                                                                                        |
| 1023 | c24090_g1_i1_len_3661_path_3689_0_214_3_903_215_217_52_218_3660_1 | 302   | guanine nucleotide exchange                     | 1220 | 0         | 70.20% | 0.105  | Coil (COILS); IPR001849 (SMART); IPR001452 (SMART); IPR000219 (SMART); IPR000219 (PFAM); IPR000219 (G3DSA:1.20.900.GENE3D); IPR011993 (G3DSA:2.30.29.GENE3D); IPR001452 (PFAM); G3DSA:2.30.30.40 (GENE3D); PTHR12845:SF5 (PANTHER); PTHR12845 (PANTHER); IPR000219 (PROSITE_PROFILES); IPR001452 (PROSITE_PROFILES); IPR001849 (PROSITE_PROFILES); IPR001452 (SUPERFAMILY); IPR000219 (SUPERFAMILY); SSF50729 (SUPERFAMILY)                                                                                                                     |
| 1024 | c24162_g1_i1_len_276_path_510_0_275_1                             | 6     | spermatogenesis-associated protein 5            | 92   | 8.59E-49  | 92.80% | 0.112  | IPR027417 (G3DSA:3.40.50.GENE3D); IPR003959 (PFAM); PTHR23077 (PANTHER); PTHR23077:SF27 (PANTHER); IPR027417 (SUPERFAMILY)                                                                                                                                                                                                                                                                                                                                                                                                                      |
| 1025 | c24300_g1_i1_len_1505_path_1_0_1504_3                             | 1012  | lipase 3                                        | 502  | 2.03E-140 | 67.70% | 0.343Y | IPR029058 (G3DSA:3.40.50.GENE3D); IPR006693 (PFAM); IPR000073 (PFAM); PTHR11005 (PANTHER); PTHR11005:SF6 (PANTHER); IPR029058 (SUPERFAMILY)                                                                                                                                                                                                                                                                                                                                                                                                     |
| 1026 | c24308_g1_i1_len_150_path_1_0_149_3                               | 1     | optix-binding protein                           | 50   | 5.85E-10  | 66.40% | 0.102  | IPR015880 (SMART); IPR013087 (G3DSA:3.30.160.GENE3D); IPR007087 (PFAM); PTHR24409 (PANTHER); IPR007087 (PROSITE_PATTERNS); IPR007087 (PROSITE_PROFILES); SSF57667 (SUPERFAMILY)                                                                                                                                                                                                                                                                                                                                                                 |
| 1027 | c24308_g2_i1_len_584_path_255_0_583_0                             | 8     | histone-lysine n-methyltransferase prdm9-like   | 195  | 1.93E-47  | 60.10% | 0.104  | IPR015880 (SMART); PF13894 (PFAM); IPR013087 (G3DSA:3.30.160.GENE3D); IPR013087 (G3DSA:3.30.160.GENE3D); PF13465 (PFAM); IPR013087 (G3DSA:3.30.160.GENE3D); PTHR24409 (PANTHER); IPR007087 (PROSITE_PATTERNS); IPR007087 (PROSITE_PATTERNS); IPR007087 (PROSITE_PATTERNS); IPR007087 (PROSITE_PATTERNS); IPR007087 (PROSITE_PROFILES); IPR007087 (PROSITE_PROFILES); IPR007087 (PROSITE_PROFILES); IPR007087 (PROSITE_PROFILES); SSF57667 (SUPERFAMILY); SSF57667 (SUPERFAMILY); SSF57667 (SUPERFAMILY)                                         |
| 1028 | c24594_g1_i1_len_2189_path_53_0_2188_2                            | 105   | dnaj homolog subfamily b member 12              | 729  | 5.20E-158 | 74.50% | 0.103  | IPR001623 (PRINTS); IPR001623 (SMART); IPR001623 (PFAM); IPR015399 (PFAM); IPR001623 (G3DSA:1.10.287.GENE3D); PTHR24077 (PANTHER); PTHR24077:SF239 (PANTHER); IPR018253 (PROSITE_PATTERNS); NON_CYTOPLASMIC_DOMAIN (PHOBIUS); TRANSMEMBRANE (PHOBIUS); TRANSMEMBRANE (PHOBIUS); NON_CYTOPLASMIC_DOMAIN (PHOBIUS); CYTOPLASMIC_DOMAIN (PHOBIUS); IPR001623 (PROSITE_PROFILES); IPR001623 (SUPERFAMILY)                                                                                                                                           |

|      |                                          |      |                                                                           |     |           |        |       |                                                                                                                                                                                                                                                                                                                                                                                                                                                                                                             |
|------|------------------------------------------|------|---------------------------------------------------------------------------|-----|-----------|--------|-------|-------------------------------------------------------------------------------------------------------------------------------------------------------------------------------------------------------------------------------------------------------------------------------------------------------------------------------------------------------------------------------------------------------------------------------------------------------------------------------------------------------------|
| 1029 | c24607_g2_i1_len_196_path_438_0_195_4    | 1    | krueppel-like factor partial                                              | 65  | 4.42E-26  | 98.10% | 0.11  | IPR015880 (SMART); IPR013087 (G3DSA:3.30.160.GENE3D); PF13465 (PFAM); IPR013087 (G3DSA:3.30.160.GENE3D); PTHR23223 (PANTHER); PTHR23223:SF80 (PANTHER); IPR007087 (PROSITE_PATTERNS); IPR007087 (PROSITE_PROFILES); IPR007087 (PROSITE_PROFILES); SSF57667 (SUPERFAMILY)                                                                                                                                                                                                                                    |
| 1030 | c24665_g1_i1_len_1026_path_1004_0_1025_5 | 1428 | low quality protein: glutathione peroxidase 1-like                        | 342 | 5.95E-87  | 79.30% | 0.129 | IPR000889 (PRINTS); IPR012336 (G3DSA:3.40.30.GENE3D); IPR000889 (PFAM); PTHR11592:SF23 (PANTHER); IPR000889 (PANTHER); IPR000889 (PROSITE_PROFILES); IPR012336 (SUPERFAMILY)                                                                                                                                                                                                                                                                                                                                |
| 1031 | c25120_g1_i1_len_864_path_53_0_863_1     | 44   | anti-lipopolysaccharide factor like protein                               | 288 | 8.25E-15  | 57.30% | 0.156 | IPR024509 (PFAM); CYTOPLASMIC_DOMAIN (PHOBIUS); TRANSMEMBRANE (PHOBIUS); NON_CYTOPLASMIC_DOMAIN (PHOBIUS); NON_CYTOPLASMIC_DOMAIN (PHOBIUS); TRANSMEMBRANE (PHOBIUS); IPR024716 (PRODOM); TMhelix (TMHMM); TMhelix (TMHMM)                                                                                                                                                                                                                                                                                  |
| 1032 | c25130_g1_i1_len_445_path_423_0_444_0    | 5    | laminin subunit alpha                                                     | 149 | 1.77E-61  | 79.90% | 0.139 | PR00011 (PRINTS); IPR002049 (SMART); G3DSA:2.10.25.10 (GENE3D); IPR002049 (PFAM); PTHR10574 (PANTHER); IPR002049 (PROSITE_PATTERNS); IPR002049 (PROSITE_PATTERNS); IPR002049 (PROSITE_PROFILES); IPR002049 (PROSITE_PROFILES); IPR002049 (PROSITE_PROFILES); IPR002049 (PROSITE_PROFILES); SSF57196 (SUPERFAMILY); SSF57196 (SUPERFAMILY)                                                                                                                                                                   |
| 1033 | c25130_g2_i1_len_171_path_845_0_170_1    | 1    | laminin subunit alpha                                                     | 57  | 8.71E-21  | 84.10% | 0.112 | no IPS match                                                                                                                                                                                                                                                                                                                                                                                                                                                                                                |
| 1034 | c25269_g2_i1_len_307_path_539_0_306_5    | 9    | zinc finger protein                                                       | 102 | 2.65E-60  | 95.10% | 0.103 | IPR015880 (SMART); PF13465 (PFAM); IPR013087 (G3DSA:3.30.160.GENE3D); IPR013087 (G3DSA:3.30.160.GENE3D); IPR007087 (PFAM); IPR013087 (G3DSA:3.30.160.GENE3D); PTHR23228:SF26 (PANTHER); PTHR23228 (PANTHER); IPR007087 (PROSITE_PATTERNS); IPR007087 (PROSITE_PATTERNS); IPR007087 (PROSITE_PATTERNS); IPR007087 (PROSITE_PATTERNS); IPR007087 (PROSITE_PROFILES); IPR007087 (PROSITE_PROFILES); IPR007087 (PROSITE_PROFILES); IPR007087 (PROSITE_PROFILES); SSF57667 (SUPERFAMILY); SSF57667 (SUPERFAMILY) |
| 1035 | c25325_g1_i1_len_1651_path_1679_0_1650_2 | 91   | serine protease mitochondrial                                             | 550 | 1.43E-130 | 69.10% | 0.212 | IPR001940 (PRINTS); IPR001478 (SMART); G3DSA:2.40.10.10 (GENE3D); PF13365 (PFAM); IPR001478 (PFAM); IPR001478 (G3DSA:2.30.42.GENE3D); G3DSA:2.40.10.10 (GENE3D); PTHR22939 (PANTHER); PTHR22939:SF69 (PANTHER); CYTOPLASMIC_DOMAIN (PHOBIUS); TRANSMEMBRANE (PHOBIUS); NON_CYTOPLASMIC_DOMAIN (PHOBIUS); IPR001478 (PROSITE_PROFILES); IPR001478 (SUPERFAMILY); IPR009003 (SUPERFAMILY)                                                                                                                     |
| 1036 | c25608_g1_i1_len_512_path_540_0_511_5    | 24   | serine protease easter                                                    | 170 | 1.11E-15  | 52.00% | 0.198 | IPR022700 (PFAM); NON_CYTOPLASMIC_DOMAIN (PHOBIUS); TRANSMEMBRANE (PHOBIUS); CYTOPLASMIC_DOMAIN (PHOBIUS)                                                                                                                                                                                                                                                                                                                                                                                                   |
| 1037 | c25667_g1_i1_len_965_path_943_0_964_5    | 29   | fizzy-related protein homolog                                             | 321 | 0         | 95.00% | 0.254 | IPR001680 (SMART); IPR015943 (G3DSA:2.130.10.GENE3D); IPR001680 (PFAM); PTHR19918 (PANTHER); PTHR19918:SF6 (PANTHER); IPR019775 (PROSITE_PATTERNS); IPR019775 (PROSITE_PATTERNS); IPR019775 (PROSITE_PATTERNS); IPR019775 (PROSITE_PATTERNS); IPR017986 (PROSITE_PROFILES); IPR001680 (PROSITE_PROFILES); IPR001680 (PROSITE_PROFILES); IPR001680 (PROSITE_PROFILES); IPR017986 (SUPERFAMILY)                                                                                                               |
| 1038 | c25679_g1_i1_len_1196_path_1224_0_1195_1 | 67   | transmembrane protease serine 11d isoform x1                              | 399 | 3.05E-136 | 64.90% | 0.105 | IPR001314 (PRINTS); IPR001254 (SMART); IPR001254 (PFAM); IPR012224 (PIRSF); G3DSA:2.40.10.10 (GENE3D); G3DSA:2.20.100.10 (GENE3D); G3DSA:2.40.10.10 (GENE3D); PTHR24265:SF76 (PANTHER); PTHR24265 (PANTHER); IPR018114 (PROSITE_PATTERNS); IPR018114 (PROSITE_PATTERNS); IPR000884 (PROSITE_PROFILES); IPR001254 (PROSITE_PROFILES); IPR009003 (SUPERFAMILY)                                                                                                                                                |
| 1039 | c25802_g1_i1_len_349_path_53_0_348_1     | 10   | lactase-phlorizin partial                                                 | 116 | 7.04E-30  | 76.70% | 0.101 | IPR001360 (PRINTS); IPR013781 (G3DSA:3.20.20.GENE3D); IPR001360 (PFAM); IPR001360 (PANTHER); IPR017853 (SUPERFAMILY)                                                                                                                                                                                                                                                                                                                                                                                        |
| 1040 | c25887_g1_i1_len_153_path_219_0_152_1    | 1    | tectonic-1 isoform x2                                                     | 51  | 3.11E-07  | 68.00% | 0.1   | IPR011677 (PFAM)                                                                                                                                                                                                                                                                                                                                                                                                                                                                                            |
| 1041 | c25912_g1_i1_len_1046_path_1074_0_1045_3 | 145  | cytochrome c oxidase assembly factor 7 homolog                            | 349 | 1.56E-71  | 65.70% | 0.099 | Coil (COILS); IPR006597 (SMART); IPR006597 (PFAM); IPR011990 (G3DSA:1.25.40.GENE3D); PTHR13891 (PANTHER); PTHR13891:SF1 (PANTHER); SSF81901 (SUPERFAMILY)                                                                                                                                                                                                                                                                                                                                                   |
| 1042 | c25953_g2_i1_len_146_path_227_0_145_2    | 2    | low quality protein: hemicentin-2                                         | 48  | 4.16E-12  | 63.50% | 0.125 | IPR001881 (PFAM); G3DSA:2.10.25.10 (GENE3D); G3DSA:2.10.25.10 (GENE3D); IPR018097 (PROSITE_PATTERNS); SSF57196 (SUPERFAMILY)                                                                                                                                                                                                                                                                                                                                                                                |
| 1043 | c26108_g2_i1_len_147_path_163_0_146_0    | 2    | thrombospondin-type laminin g domain and ear repeat-containing isoform x1 | 49  | 1.15E-12  | 75.70% | 0.115 | IPR005492 (PFAM); IPR009039 (PROSITE_PROFILES)                                                                                                                                                                                                                                                                                                                                                                                                                                                              |





|      |                                                                   |      |                                                                        |     |           |        |        |                                                                                                                                                                                                                                                                                                                                                                                                                                                                                                                                                                                                                                                                                                          |
|------|-------------------------------------------------------------------|------|------------------------------------------------------------------------|-----|-----------|--------|--------|----------------------------------------------------------------------------------------------------------------------------------------------------------------------------------------------------------------------------------------------------------------------------------------------------------------------------------------------------------------------------------------------------------------------------------------------------------------------------------------------------------------------------------------------------------------------------------------------------------------------------------------------------------------------------------------------------------|
| 1055 | c27007_g1_i1_len_1851_path_1879_0_1850_1                          | 285  | estradiol 17-beta-dehydrogenase 2                                      | 617 | 3.16E-71  | 56.70% | 0.114  | IPR002198 (PRINTS); IPR002347 (PRINTS); IPR016040 (G3DSA:3.40.50.GENE3D); IPR002198 (PFAM); PTHR24316:SF215 (PANTHER); PTHR24316 (PANTHER); NON_CYTOPLASMIC_DOMAIN (PHOBIUS); NON_CYTOPLASMIC_DOMAIN (PHOBIUS); CYTOPLASMIC_DOMAIN (PHOBIUS); TRANSMEMBRANE (PHOBIUS); TRANSMEMBRANE (PHOBIUS); CYTOPLASMIC_DOMAIN (PHOBIUS); TRANSMEMBRANE (PHOBIUS); SSF51735 (SUPERFAMILY); TMhelix (TMHMM); TMhelix (TMHMM)                                                                                                                                                                                                                                                                                          |
| 1056 | c27115_g2_i1_len_939_path_1199_0_141_21_32_142_146_1345_147_938_0 | 53   | ribonuclease oy                                                        | 313 | 9.41E-64  | 59.40% | 0.124  | IPR001568 (G3DSA:3.90.730.GENE3D); IPR001568 (PFAM); IPR001568 (PANTHER); IPR018188 (PROSITE_PATTERNS); IPR001568 (SUPERFAMILY) IPR006689 (PRINTS); IPR003579 (SMART); IPR024156 (SMART); IPR006687 (SMART); IPR005225 (TIGRFAM); IPR027417 (G3DSA:3.40.50.GENE3D); IPR006689 (PFAM); PTHR11711 (PANTHER); PTHR11711:SF118 (PANTHER); CYTOPLASMIC_DOMAIN (PHOBIUS); NON_CYTOPLASMIC_DOMAIN (PHOBIUS); TRANSMEMBRANE (PHOBIUS); TRANSMEMBRANE (PHOBIUS); NON_CYTOPLASMIC_DOMAIN (PHOBIUS); CYTOPLASMIC_DOMAIN (PHOBIUS); TRANSMEMBRANE (PHOBIUS); CYTOPLASMIC_DOMAIN (PHOBIUS); IPR024156 (PROSITE_PROFILES); IPR027417 (SUPERFAMILY); TMhelix (TMHMM); TMhelix (TMHMM); TMhelix (TMHMM); TMhelix (TMHMM) |
| 1057 | c27123_g1_i1_len_1918_path_53_0_1917_2                            | 2092 | adp-ribosylation factor 1                                              | 639 | 1.84E-127 | 98.50% | 0.11   | IPR017849 (G3DSA:3.40.720.GENE3D); IPR002591 (PFAM); IPR024873 (PANTHER); IPR017850 (SUPERFAMILY)                                                                                                                                                                                                                                                                                                                                                                                                                                                                                                                                                                                                        |
| 1058 | c27128_g1_i1_len_566_path_544_0_565_3                             | 22   | ectonucleotide pyrophosphatase phosphodiesterase family member partial | 189 | 3.44E-31  | 65.80% | 0.11   | IPR003172 (SMART); IPR003172 (PFAM); IPR003172 (G3DSA:2.60.40.GENE3D); PTHR11306 (PANTHER); TRANSMEMBRANE (PHOBIUS); NON_CYTOPLASMIC_DOMAIN (PHOBIUS); TRANSMEMBRANE (PHOBIUS); TRANSMEMBRANE (PHOBIUS); NON_CYTOPLASMIC_DOMAIN (PHOBIUS); CYTOPLASMIC_DOMAIN (PHOBIUS); CYTOPLASMIC_DOMAIN (PHOBIUS); IPR014756 (SUPERFAMILY)                                                                                                                                                                                                                                                                                                                                                                           |
| 1059 | c27142_g1_i1_len_1243_path_53_0_72_126_73_1210_1262_1211_1242_1   | 605  | md-2-related lipid-recognition                                         | 414 | 1.37E-16  | 50.50% | 0.281  | IPR001314 (PRINTS); IPR001254 (SMART); G3DSA:2.40.10.10 (GENE3D); G3DSA:2.40.10.10 (GENE3D); IPR001254 (PFAM); PTHR24256 (PANTHER); IPR018114 (PROSITE_PATTERNS); IPR018114 (PROSITE_PATTERNS); SIGNAL_PEPTIDE (PHOBIUS); SIGNAL_PEPTIDE_H_REGION (PHOBIUS); SIGNAL_PEPTIDE_C_REGION (PHOBIUS); NON_CYTOPLASMIC_DOMAIN (PHOBIUS); SIGNAL_PEPTIDE_N_REGION (PHOBIUS); IPR001254 (PROSITE_PROFILES); IPR009003 (SUPERFAMILY)                                                                                                                                                                                                                                                                               |
| 1060 | c27166_g1_i1_len_1619_path_1697_0_1618_2                          | 509  | plasminogen activator spa                                              | 539 | 8.86E-84  | 64.60% | 0.406Y | IPR002290 (SMART); IPR016253 (PIRSF); G3DSA:1.10.510.10 (GENE3D); G3DSA:3.30.200.20 (GENE3D); IPR000719 (PFAM); PTHR22988 (PANTHER); PTHR22988:SF2 (PANTHER); IPR008271 (PROSITE_PATTERNS); IPR017441 (PROSITE_PATTERNS); IPR000719 (PROSITE_PROFILES); IPR011009 (SUPERFAMILY)                                                                                                                                                                                                                                                                                                                                                                                                                          |
| 1061 | c27254_g1_i1_len_724_path_587_0_69_44_7_0_723_3                   | 24   | serine threonine-protein kinase genghis khan isoform x1                | 242 | 3.79E-144 | 98.90% | 0.133  | IPR001747 (PFAM); IPR015816 (G3DSA:2.30.230.GENE3D); PTHR23345 (PANTHER); PTHR23345:SF1 (PANTHER); SIGNAL_PEPTIDE_C_REGION (PHOBIUS); NON_CYTOPLASMIC_DOMAIN (PHOBIUS); SIGNAL_PEPTIDE (PHOBIUS); SIGNAL_PEPTIDE_H_REGION (PHOBIUS); SIGNAL_PEPTIDE_N_REGION (PHOBIUS); SignalP-TM (SIGNALP_GRAM_POSITIVE); SignalP-noTM (SIGNALP_EUK); IPR015819 (SUPERFAMILY); TMhelix (TMHMM)                                                                                                                                                                                                                                                                                                                         |
| 1062 | c27271_g1_i2_len_570_path_1_0_245_247_2_46_569_4                  | 29   | beta- -glucan-binding protein precursor                                | 190 | 3.38E-17  | 51.70% | 0.907Y | IPR002347 (PRINTS); IPR002198 (PRINTS); IPR002198 (PFAM); IPR016040 (G3DSA:3.40.50.GENE3D); PTHR24322:SF237 (PANTHER); PTHR24322 (PANTHER); SSF51735 (SUPERFAMILY)                                                                                                                                                                                                                                                                                                                                                                                                                                                                                                                                       |
| 1063 | c27333_g1_i1_len_730_path_1665_0_21_980_22_729_0                  | 66   | uncharacterized oxidoreductase                                         | 244 | 1.12E-62  | 69.00% | 0.097  | IPR002198 (PRINTS); IPR002347 (PRINTS); IPR016040 (G3DSA:3.40.50.GENE3D); IPR002198 (PFAM); PTHR24322 (PANTHER); PTHR24322 (PANTHER); SSF51735 (SUPERFAMILY)                                                                                                                                                                                                                                                                                                                                                                                                                                                                                                                                             |
| 1064 | c27333_g1_i2_len_855_path_833_0_146_980_147_854_2                 | 83   | uncharacterized oxidoreductase                                         | 285 | 1.34E-81  | 68.00% | 0.103  | IPR002198 (PRINTS); IPR002347 (PRINTS); IPR016040 (G3DSA:3.40.50.GENE3D); IPR002198 (PFAM); PTHR24322 (PANTHER); PTHR24322:SF237 (PANTHER); SSF51735 (SUPERFAMILY)                                                                                                                                                                                                                                                                                                                                                                                                                                                                                                                                       |
| 1065 | c27336_g1_i1_len_1332_path_1_0_337_720_338_412_339_413_1331_5     | 84   | glypican- partial                                                      | 444 | 2.27E-67  | 58.20% | 0.151  | IPR001863 (PFAM); IPR001863 (PANTHER); IPR019803 (PROSITE_PATTERNS); CYTOPLASMIC_DOMAIN (PHOBIUS); TRANSMEMBRANE (PHOBIUS); NON_CYTOPLASMIC_DOMAIN (PHOBIUS)                                                                                                                                                                                                                                                                                                                                                                                                                                                                                                                                             |
| 1066 | c27336_g1_i2_len_1063_path_721_0_68_720_69_143_339_144_1062_5     | 67   | glypican- partial                                                      | 354 | 2.68E-68  | 58.90% | 0.151  | IPR001863 (PFAM); IPR001863 (PANTHER); IPR019803 (PROSITE_PATTERNS)                                                                                                                                                                                                                                                                                                                                                                                                                                                                                                                                                                                                                                      |
| 1067 | c27336_g1_i3_len_1257_path_1_0_337_339_338_1256_5                 | 82   | glypican- partial                                                      | 419 | 3.38E-68  | 56.60% | 0.151  | IPR001863 (PFAM); IPR001863 (PANTHER); IPR019803 (PROSITE_PATTERNS); TRANSMEMBRANE (PHOBIUS); CYTOPLASMIC_DOMAIN (PHOBIUS); NON_CYTOPLASMIC_DOMAIN (PHOBIUS)                                                                                                                                                                                                                                                                                                                                                                                                                                                                                                                                             |
| 1068 | c27340_g1_i1_len_764_path_53_0_763_2                              | 166  | von willebrand factor like 2                                           | 254 | 2.21E-11  | 40.30% | 0.102  | no IPS match                                                                                                                                                                                                                                                                                                                                                                                                                                                                                                                                                                                                                                                                                             |

|      |                                                                        |        |                                                                          |      |           |        |         |                                                                                                                                                                                                                                                                                                                                                                                                                                                                                                                                                                                                                                                                                                                          |
|------|------------------------------------------------------------------------|--------|--------------------------------------------------------------------------|------|-----------|--------|---------|--------------------------------------------------------------------------------------------------------------------------------------------------------------------------------------------------------------------------------------------------------------------------------------------------------------------------------------------------------------------------------------------------------------------------------------------------------------------------------------------------------------------------------------------------------------------------------------------------------------------------------------------------------------------------------------------------------------------------|
| 1069 | c27340_g2_i1_len_355_path_1863_0_354_1                                 | 91     | phosphatidylinositol phosphatase ptrq-like protein                       | 118  | 7.67E-06  | 52.00% | 0.11    | no IPS match<br>IPR000118 (SMART); IPR000118 (PFAM); PTHR12274 (PANTHER); PTHR12274:SF1 (PANTHER); IPR000118 (PROSITE_PATTERNS); IPR000118 (PROSITE_PATTERNS); TRANSMEMBRANE (PHOBIUS); TRANSMEMBRANE (PHOBIUS); NON_CYTOPLASMIC_DOMAIN (PHOBIUS); CYTOPLASMIC_DOMAIN (PHOBIUS); NON_CYTOPLASMIC_DOMAIN (PHOBIUS); TRANSMEMBRANE (PHOBIUS); CYTOPLASMIC_DOMAIN (PHOBIUS); NON_CYTOPLASMIC_DOMAIN (PHOBIUS); TRANSMEMBRANE (PHOBIUS); NON_CYTOPLASMIC_DOMAIN (PHOBIUS); CYTOPLASMIC_DOMAIN (PHOBIUS); TRANSMEMBRANE (PHOBIUS); TRANSMEMBRANE (PHOBIUS); SSF57277 (SUPERFAMILY); SSF57277 (SUPERFAMILY); TMhelix (TMHMM); TMhelix (TMHMM); TMhelix (TMHMM)                                                                 |
| 1070 | c2735_g1_i1_len_3616_path_1_0_3615_2                                   | 5292   | granulins- partial                                                       | 1205 | 2.28E-50  | 52.10% | 0.124   | IPR000242 (PRINTS); IPR003595 (SMART); IPR000242 (SMART); IPR000242 (PFAM); IPR029021 (G3DSA:3.90.190.GENE3D); PTHR19134 (PANTHER); PTHR19134:SF252 (PANTHER); IPR016130 (PROSITE_PATTERNS); CYTOPLASMIC_DOMAIN (PHOBIUS); TRANSMEMBRANE (PHOBIUS); NON_CYTOPLASMIC_DOMAIN (PHOBIUS); IPR000387 (PROSITE_PROFILES); IPR000242 (PROSITE_PROFILES); IPR029021 (SUPERFAMILY); TMhelix (TMHMM)                                                                                                                                                                                                                                                                                                                               |
| 1071 | c27442_g2_i1_len_1413_path_1391_0_1412_1                               | 68     | tyrosine-protein phosphatase non-receptor                                | 471  | 5.72E-155 | 72.60% | 0.102   | IPR000436 (SMART); IPR000436 (PFAM); G3DSA:2.10.70.10 (GENE3D); G3DSA:2.10.70.10 (GENE3D); G3DSA:2.10.70.10 (GENE3D); G3DSA:2.10.70.10 (GENE3D); PTHR19325 (PANTHER); NON_CYTOPLASMIC_DOMAIN (PHOBIUS); TRANSMEMBRANE (PHOBIUS); CYTOPLASMIC_DOMAIN (PHOBIUS); IPR000436 (PROSITE_PROFILES); IPR000436 (PROSITE_PROFILES); IPR000436 (PROSITE_PROFILES); IPR000436 (SUPERFAMILY); IPR000436 (SUPERFAMILY)                                                                                                                                                                                                                                                                                                                |
| 1072 | c27460_g1_i1_len_1064_path_105_0_1063_5                                | 78     | von willebrand factor type egf and pentraxin domain-containing protein 1 | 354  | 3.67E-30  | 43.70% | 0.118   | IPR002290 (SMART); G3DSA:1.10.510.10 (GENE3D); G3DSA:3.30.200.20 (GENE3D); IPR000719 (PFAM); PTHR24357:SF70 (PANTHER); PTHR24357 (PANTHER); IPR017441 (PROSITE_PATTERNS); IPR000719 (PROSITE_PROFILES); IPR011009 (SUPERFAMILY)                                                                                                                                                                                                                                                                                                                                                                                                                                                                                          |
| 1073 | c27507_g1_i1_len_1403_path_1289_0_1024_2312_1025_1213_2312_1214_1402_3 | 78     | protein kinase 3-like                                                    | 468  | 7.33E-84  | 80.90% | 0.102   | IPR003599 (SMART); IPR003598 (SMART); IPR013783 (G3DSA:2.60.40.GENE3D); IPR013151 (PFAM); IPR007110 (PROSITE_PROFILES); SSF48726 (SUPERFAMILY)                                                                                                                                                                                                                                                                                                                                                                                                                                                                                                                                                                           |
| 1074 | c2769_g2_i1_len_346_path_287_0_345_5                                   | 6      | protein sidekick-1-like isoform x5                                       | 115  | 1.48E-13  | 50.90% | 0.148   | IPR010795 (PFAM); IPR017046 (PANTHER)                                                                                                                                                                                                                                                                                                                                                                                                                                                                                                                                                                                                                                                                                    |
| 1075 | c27762_g1_i1_len_818_path_896_0_817_1                                  | 30     | prenylcysteine oxidase-like                                              | 273  | 2.42E-51  | 61.10% | 0.117   | IPR003172 (SMART); IPR003172 (G3DSA:2.60.40.GENE3D); IPR003172 (PFAM); PTHR11306 (PANTHER); CYTOPLASMIC_DOMAIN (PHOBIUS); NON_CYTOPLASMIC_DOMAIN (PHOBIUS); TRANSMEMBRANE (PHOBIUS); IPR014756 (SUPERFAMILY); TMhelix (TMHMM)                                                                                                                                                                                                                                                                                                                                                                                                                                                                                            |
| 1076 | c27800_g1_i1_len_679_path_1_0_678_1                                    | 530    | epididymal secretory protein e1                                          | 226  | 9.52E-31  | 57.80% | 0.396Y  | PTHR22901 (PANTHER); CYTOPLASMIC_DOMAIN (PHOBIUS); TRANSMEMBRANE (PHOBIUS); NON_CYTOPLASMIC_DOMAIN (PHOBIUS); TMhelix (TMHMM); TMhelix (TMHMM)                                                                                                                                                                                                                                                                                                                                                                                                                                                                                                                                                                           |
| 1077 | c2783_g1_i2_len_496_path_1_0_237_239_238_495_5                         | 9      | sialate o-acetyltransferase-like                                         | 165  | 1.61E-15  | 57.10% | 0.205   | IPR013788 (PRINTS); IPR005203 (G3DSA:2.60.40.GENE3D); IPR005203 (PFAM); IPR008922 (G3DSA:1.10.1280.GENE3D); IPR005204 (G3DSA:1.20.1370.GENE3D); IPR000896 (PFAM); IPR005204 (PFAM); PTHR11511:SF5 (PANTHER); IPR013788 (PANTHER); IPR013788 (PROSITE_PATTERNS); IPR002227 (PROSITE_PATTERNS); IPR013788 (PROSITE_PATTERNS); SIGNAL_PEPTIDE_C_REGION (PHOBIUS); TRANSMEMBRANE (PHOBIUS); TRANSMEMBRANE (PHOBIUS); NON_CYTOPLASMIC_DOMAIN (PHOBIUS); CYTOPLASMIC_DOMAIN (PHOBIUS); NON_CYTOPLASMIC_DOMAIN (PHOBIUS); SIGNAL_PEPTIDE (PHOBIUS); SIGNAL_PEPTIDE_N_REGION (PHOBIUS); SIGNAL_PEPTIDE_H_REGION (PHOBIUS); SignalP-noTM (SIGNALP_EUK); IPR005204 (SUPERFAMILY); IPR014756 (SUPERFAMILY); IPR008922 (SUPERFAMILY) |
| 1078 | c27866_g2_i1_len_2377_path_4616_0_2376_0                               | 949079 | hemocyanin subunit type 1 precursor                                      | 793  | 0         | 75.70% | 0.811 Y | IPR004172 (SMART); IPR014775 (PFAM); PTHR23122 (PANTHER); IPR004172 (PROSITE_PROFILES); IPR004172 (PROSITE_PROFILES); SSF101288 (SUPERFAMILY)                                                                                                                                                                                                                                                                                                                                                                                                                                                                                                                                                                            |
| 1079 | c28043_g1_i1_len_523_path_1_0_303_305_304_522_0                        | 19     | maguk p55 subfamily member 6                                             | 175  | 9.69E-52  | 69.80% | 0.106   | IPR004172 (SMART); IPR014775 (PFAM); PTHR23122 (PANTHER); IPR004172 (PROSITE_PROFILES); SSF101288 (SUPERFAMILY)                                                                                                                                                                                                                                                                                                                                                                                                                                                                                                                                                                                                          |
| 1080 | c28043_g1_i2_len_486_path_5746_0_266_305_267_485_2                     | 13     | calcium calmodulin-dependent serine protein kinase                       | 162  | 1.31E-16  | 65.10% | 0.123   | IPR004172 (SMART); IPR014775 (PFAM); PTHR23122 (PANTHER); IPR004172 (PROSITE_PROFILES); SSF101288 (SUPERFAMILY)                                                                                                                                                                                                                                                                                                                                                                                                                                                                                                                                                                                                          |

|      |                                                                                                         |     |                                                    |     |           |        |         |                                                                                                                                                                                                                                                                                                                                                                                                                                                                                                                                                          |
|------|---------------------------------------------------------------------------------------------------------|-----|----------------------------------------------------|-----|-----------|--------|---------|----------------------------------------------------------------------------------------------------------------------------------------------------------------------------------------------------------------------------------------------------------------------------------------------------------------------------------------------------------------------------------------------------------------------------------------------------------------------------------------------------------------------------------------------------------|
| 1081 | c28043_g2_i1_len_2262_path_1001_0_2261_5                                                                | 150 | calcium calmodulin-dependent serine protein kinase | 754 | 0         | 81.10% | 0.105   | IPR001452 (SMART); IPR001478 (SMART); IPR008145 (SMART); IPR001478 (G3DSA:2.30.42.GENE3D); G3DSA:2.30.30.40 (GENE3D); G3DSA:3.30.63.10 (GENE3D); IPR008145 (PFAM); IPR027417 (G3DSA:3.40.50.GENE3D); IPR001478 (PFAM); IPR011511 (PFAM); PTHR23122 (PANTHER); IPR020590 (PROSITE_PATTERNS); TRANSMEMBRANE (PHOBIUS); CYTOPLASMIC_DOMAIN (PHOBIUS); NON_CYTOPLASMIC_DOMAIN (PHOBIUS); IPR008144 (PROSITE_PROFILES); IPR001478 (PROSITE_PROFILES); IPR001452 (PROSITE_PROFILES); IPR027417 (SUPERFAMILY); IPR001478 (SUPERFAMILY); IPR001452 (SUPERFAMILY) |
| 1082 | c28145_g1_i1_len_1531_path_1689_0_680_8_62_681_1530_5                                                   | 66  | pancreatic triacylglycerol lipase                  | 510 | 4.11E-70  | 58.00% | 0.28    | IPR000734 (PRINTS); IPR029058 (G3DSA:3.40.50.GENE3D); IPR013818 (PFAM); IPR000734 (PANTHER); IPR029058 (SUPERFAMILY)                                                                                                                                                                                                                                                                                                                                                                                                                                     |
| 1083 | c28240_g1_i1_len_1144_path_1241_0_702_8_6_703_714_98_715_893_31_894_1143_1                              | 47  | coiled-coil domain-containing protein 134-like     | 381 | 7.57E-51  | 63.80% | 0.420Y  | IPR026321 (PFAM); IPR026321 (PANTHER); TRANSMEMBRANE (PHOBIUS); CYTOPLASMIC_DOMAIN (PHOBIUS); NON_CYTOPLASMIC_DOMAIN (PHOBIUS)                                                                                                                                                                                                                                                                                                                                                                                                                           |
| 1084 | c28240_g1_i2_len_1132_path_1241_0_702_9_8_703_881_31_882_1131_1                                         | 55  | coiled-coil domain-containing protein 134-like     | 377 | 4.74E-53  | 65.10% | 0.420 Y | IPR026321 (PFAM); IPR026321 (PANTHER); TRANSMEMBRANE (PHOBIUS); NON_CYTOPLASMIC_DOMAIN (PHOBIUS); CYTOPLASMIC_DOMAIN (PHOBIUS)                                                                                                                                                                                                                                                                                                                                                                                                                           |
| 1085 | c28264_g2_i1_len_358_path_959_0_356_140_4_357_357_1                                                     | 11  | ecdysteroid-regulated 16 kda                       | 119 | 7.59E-26  | 74.20% | 0.162   | IPR003172 (PFAM); IPR003172 (G3DSA:2.60.40.GENE3D); PTHR11306 (PANTHER); PTHR11306:SF0 (PANTHER); IPR014756 (SUPERFAMILY)                                                                                                                                                                                                                                                                                                                                                                                                                                |
| 1086 | c28274_g1_i1_len_1094_path_1072_0_1093_1                                                                | 105 | pc3-like endoprotease variant b-like               | 365 | 4.17E-39  | 61.10% | 0.187   | IPR015500 (PRINTS); IPR000209 (G3DSA:3.40.50.GENE3D); IPR000209 (PFAM); G3DSA:3.30.70.850 (GENE3D); PTHR10795:SF340 (PANTHER); IPR015500 (PANTHER); IPR023827 (PROSITE_PATTERNS); CYTOPLASMIC_DOMAIN (PHOBIUS); TRANSMEMBRANE (PHOBIUS); NON_CYTOPLASMIC_DOMAIN (PHOBIUS); IPR009020 (SUPERFAMILY); IPR000209 (SUPERFAMILY)                                                                                                                                                                                                                              |
| 1087 | c28274_g2_i1_len_153_path_2273_0_152_1                                                                  | 2   | cre-bli-4 protein                                  | 51  | 2.50E-10  | 74.70% | 0.101   | IPR000209 (G3DSA:3.40.50.GENE3D); IPR000209 (SUPERFAMILY)                                                                                                                                                                                                                                                                                                                                                                                                                                                                                                |
| 1088 | c28289_g1_i1_len_440_path_1_0_236_238_2_37_263_238_264_290_265_291_304_279_30_5_326_809_327_434_784_4_1 | 13  | flocculation protein flo11-like                    | 147 | 2.38E-08  | 41.00% | 0.116   | no IPS match                                                                                                                                                                                                                                                                                                                                                                                                                                                                                                                                             |
| 1089 | c28330_g1_i1_len_1549_path_832_0_385_17_34_386_1548_0                                                   | 166 | arylsulfatase b                                    | 517 | 1.18E-97  | 68.10% | 0.199   | G3DSA:3.30.1120.10 (GENE3D); IPR017849 (G3DSA:3.40.720.GENE3D); IPR000917 (PFAM); PTHR10342:SF189 (PANTHER); PTHR10342 (PANTHER); IPR024607 (PROSITE_PATTERNS); NON_CYTOPLASMIC_DOMAIN (PHOBIUS); TRANSMEMBRANE (PHOBIUS); TRANSMEMBRANE (PHOBIUS); CYTOPLASMIC_DOMAIN (PHOBIUS); NON_CYTOPLASMIC_DOMAIN (PHOBIUS); IPR017850 (SUPERFAMILY)                                                                                                                                                                                                              |
| 1090 | c28330_g1_i2_len_854_path_832_0_385_121_8_386_853_0                                                     | 91  | arylsulfatase b                                    | 285 | 1.10E-107 | 77.80% | 0.199   | IPR000917 (PFAM); IPR017849 (G3DSA:3.40.720.GENE3D); PTHR10342 (PANTHER); PTHR10342:SF189 (PANTHER); IPR024607 (PROSITE_PATTERNS); IPR024607 (PROSITE_PATTERNS); TRANSMEMBRANE (PHOBIUS); TRANSMEMBRANE (PHOBIUS); NON_CYTOPLASMIC_DOMAIN (PHOBIUS); NON_CYTOPLASMIC_DOMAIN (PHOBIUS); CYTOPLASMIC_DOMAIN (PHOBIUS); IPR017850 (SUPERFAMILY)                                                                                                                                                                                                             |
| 1091 | c28338_g2_i1_len_390_path_710_0_228_439_229_252_463_253_389_2                                           | 15  | zinc finger protein 358                            | 130 | 3.45E-14  | 61.80% | 0.13    | IPR015880 (SMART); IPR013087 (G3DSA:3.30.160.GENE3D); PF13894 (PFAM); PF13465 (PFAM); IPR013087 (G3DSA:3.30.160.GENE3D); PTHR24409:SF13 (PANTHER); PTHR24409 (PANTHER); IPR007087 (PROSITE_PATTERNS); IPR007087 (PROSITE_PATTERNS); IPR007087 (PROSITE_PROFILES); IPR007087 (PROSITE_PROFILES); SSF57667 (SUPERFAMILY)                                                                                                                                                                                                                                   |
| 1092 | c28358_g1_i1_len_766_path_541_0_162_704_163_211_25_212_456_270_457_765_4                                | 40  | upf0764 protein c16orf89 homolog                   | 255 | 2.61E-29  | 47.70% | 0.105   | no IPS match                                                                                                                                                                                                                                                                                                                                                                                                                                                                                                                                             |
| 1093 | c28358_g1_i2_len_922_path_869_0_327_704_328_376_1244_377_612_270_613_921_4                              | 48  | upf0764 protein c16orf89 homolog                   | 307 | 1.35E-28  | 48.60% | 0.105   | no IPS match                                                                                                                                                                                                                                                                                                                                                                                                                                                                                                                                             |
| 1094 | c28379_g1_i1_len_221_path_941_0_220_1                                                                   | 1   | ensangg00000017398 protein                         | 74  | 1.01E-41  | 99.40% | 0.1     | IPR013126 (PRINTS); G3DSA:3.30.420.40 (GENE3D); IPR013126 (PFAM); PTHR19375:SF142 (PANTHER); PTHR19375 (PANTHER); IPR018181 (PROSITE_PATTERNS); SSF53067 (SUPERFAMILY)                                                                                                                                                                                                                                                                                                                                                                                   |
| 1095 | c28379_g2_i1_len_255_path_233_0_254_1                                                                   | 6   | heat shock protein 70 cognate                      | 85  | 8.10E-52  | 99.20% | 0.1     | G3DSA:3.90.640.10 (GENE3D); IPR013126 (PFAM); PTHR19375:SF142 (PANTHER); PTHR19375 (PANTHER); SSF53067 (SUPERFAMILY)                                                                                                                                                                                                                                                                                                                                                                                                                                     |
| 1096 | c28379_g3_i1_len_162_path_465_0_161_2                                                                   | 1   | heat shock cognate partial                         | 54  | 2.15E-27  | 98.60% | 0.106   | IPR013126 (PFAM); G3DSA:3.30.420.40 (GENE3D); G3DSA:3.30.420.40 (GENE3D); PTHR19375:SF142 (PANTHER); PTHR19375 (PANTHER); IPR018181 (PROSITE_PATTERNS); SSF53067 (SUPERFAMILY)                                                                                                                                                                                                                                                                                                                                                                           |
| 1097 | c28383_g1_i1_len_513_path_1_0_512_0                                                                     | 19  | protein flightless-1-like                          | 171 | 5.89E-52  | 94.70% | 0.102   | IPR007122 (PRINTS); IPR007122 (SMART); IPR007123 (PFAM); IPR029006 (G3DSA:3.40.20.GENE3D); IPR029919 (PTHR11977:PANTHER); IPR007122 (PANTHER); SSF55753 (SUPERFAMILY)                                                                                                                                                                                                                                                                                                                                                                                    |

|      |                                                                        |        |                                                     |      |           |        |         |                                                                                                                                                                                                                                                                                                                                                                                                                                                                                                                                                         |
|------|------------------------------------------------------------------------|--------|-----------------------------------------------------|------|-----------|--------|---------|---------------------------------------------------------------------------------------------------------------------------------------------------------------------------------------------------------------------------------------------------------------------------------------------------------------------------------------------------------------------------------------------------------------------------------------------------------------------------------------------------------------------------------------------------------|
| 1098 | c28470_g1_i1_len_17166_path_105_0_17165_5                              | 116346 | hypothetical protein DAPPUDRAFT_332703              | 5722 | 0         | 50.70% | 0.113   | Coil (COILS); IPR014853 (SMART); IPR001846 (SMART); IPR014853 (PFAM); IPR001846 (PFAM); IPR002035 (G3DSA:3.40.50.GENE3D); PTHR23361:SF13 (PANTHER); PTHR23361 (PANTHER); TRANSMEMBRANE (PHOBIUS); CYTOPLASMIC_DOMAIN (PHOBIUS); TRANSMEMBRANE (PHOBIUS); CYTOPLASMIC_DOMAIN (PHOBIUS); TRANSMEMBRANE (PHOBIUS); TRANSMEMBRANE (PHOBIUS); NON_CYTOPLASMIC_DOMAIN (PHOBIUS); NON_CYTOPLASMIC_DOMAIN (PHOBIUS); NON_CYTOPLASMIC_DOMAIN (PHOBIUS); IPR001846 (PROSITE_PROFILES); IPR002035 (SUPERFAMILY); TMhelix (TMHMM); TMhelix (TMHMM); TMhelix (TMHMM) |
| 1099 | c28486_g1_i1_len_1098_path_1_0_1097_2                                  | 1517   | plasminogen activator spa                           | 366  | 1.03E-67  | 57.70% | 0.381 Y | IPR001314 (PRINTS); IPR001254 (SMART); G3DSA:2.40.10.10 (GENE3D); G3DSA:2.40.10.10 (GENE3D); IPR001254 (PFAM); G3DSA:2.40.10.10 (GENE3D); PTHR24276 (PANTHER); IPR018114 (PROSITE_PATTERNS); IPR018114 (PROSITE_PATTERNS); NON_CYTOPLASMIC_DOMAIN (PHOBIUS); SIGNAL_PEPTIDE (PHOBIUS); SIGNAL_PEPTIDE_N_REGION (PHOBIUS); SIGNAL_PEPTIDE_H_REGION (PHOBIUS); SIGNAL_PEPTIDE_C_REGION (PHOBIUS); IPR001254 (PROSITE_PROFILES); IPR009003 (SUPERFAMILY); TMhelix (TMHMM)                                                                                  |
| 1100 | c28548_g1_i1_len_750_path_728_0_749_4                                  | 1079   | af425264_1lysozyme precursor                        | 250  | 3.42E-46  | 63.90% | 0.126   | IPR001916 (PRINTS); IPR000974 (PRINTS); IPR001916 (SMART); G3DSA:1.10.530.10 (GENE3D); IPR001916 (PFAM); PTHR11407 (PANTHER); IPR019799 (PROSITE_PATTERNS); TRANSMEMBRANE (PHOBIUS); CYTOPLASMIC_DOMAIN (PHOBIUS); NON_CYTOPLASMIC_DOMAIN (PHOBIUS); IPR001916 (PROSITE_PROFILES); IPR023346 (SUPERFAMILY); TMhelix (TMHMM)                                                                                                                                                                                                                             |
| 1101 | c28603_g1_i2_len_1515_path_53_0_451_503_452_1514_4                     | 100    | protein partial                                     | 505  | 7.85E-97  | 56.10% | 0.095   | Coil (COILS); Coil (COILS); Coil (COILS); Coil (COILS); Coil (COILS); Coil (COILS); IPR029605 (PANTHER)                                                                                                                                                                                                                                                                                                                                                                                                                                                 |
| 1102 | c28610_g1_i1_len_2494_path_105_0_2389_2_491_2390_2441_2491_2442_2493_4 | 305    | chorion peroxidase-like                             | 831  | 8.51E-136 | 55.00% | 0.129   | IPR019791 (PRINTS); IPR019791 (G3DSA:1.10.640.GENE3D); IPR019791 (PFAM); PTHR11475 (PANTHER); NON_CYTOPLASMIC_DOMAIN (PHOBIUS); NON_CYTOPLASMIC_DOMAIN (PHOBIUS); TRANSMEMBRANE (PHOBIUS); CYTOPLASMIC_DOMAIN (PHOBIUS); TRANSMEMBRANE (PHOBIUS); IPR019791 (PROSITE_PROFILES); IPR010255 (SUPERFAMILY)                                                                                                                                                                                                                                                 |
| 1103 | c28630_g1_i1_len_945_path_969_0_545_151_4_546_560_48_561_944_0         | 54     | calcium-activated chloride channel regulator 1-like | 315  | 9.63E-25  | 54.40% | 0.103   | PTHR10579 (PANTHER); PTHR10579:SF8 (PANTHER); TRANSMEMBRANE (PHOBIUS); NON_CYTOPLASMIC_DOMAIN (PHOBIUS); CYTOPLASMIC_DOMAIN (PHOBIUS); NON_CYTOPLASMIC_DOMAIN (PHOBIUS); TRANSMEMBRANE (PHOBIUS); TMhelix (TMHMM); TMhelix (TMHMM)                                                                                                                                                                                                                                                                                                                      |
| 1104 | c28630_g1_i2_len_930_path_969_0_545_48_546_929_0                       | 36     | calcium-activated chloride channel regulator 1-like | 310  | 1.57E-23  | 54.70% | 0.103   | PTHR10579:SF8 (PANTHER); PTHR10579 (PANTHER); NON_CYTOPLASMIC_DOMAIN (PHOBIUS); TRANSMEMBRANE (PHOBIUS); TRANSMEMBRANE (PHOBIUS); CYTOPLASMIC_DOMAIN (PHOBIUS); NON_CYTOPLASMIC_DOMAIN (PHOBIUS); TMhelix (TMHMM); TMhelix (TMHMM)                                                                                                                                                                                                                                                                                                                      |
| 1105 | c28639_g1_i1_len_541_path_519_0_431_951_432_444_964_445_540_1          | 42     | protein disulfide-isomerase a4-like                 | 180  | 5.23E-60  | 68.10% | 0.902 Y | PR00421 (PRINTS); IPR012336 (G3DSA:3.40.30.GENE3D); IPR005788 (TIGRFAM); IPR013766 (PFAM); PTHR18929 (PANTHER); PTHR18929:SF56 (PANTHER); IPR017937 (PROSITE_PATTERNS); NON_CYTOPLASMIC_DOMAIN (PHOBIUS); SIGNAL_PEPTIDE_H_REGION (PHOBIUS); SIGNAL_PEPTIDE_C_REGION (PHOBIUS); SIGNAL_PEPTIDE_N_REGION (PHOBIUS); SIGNAL_PEPTIDE (PHOBIUS); IPR012336 (PROSITE_PROFILES); SignalP-noTM (SIGNALP_GRAM_NEGATIVE); SignalP-noTM (SIGNALP_EUK); IPR012336 (SUPERFAMILY)                                                                                    |
| 1106 | c28676_g1_i1_len_2181_path_1261_0_1573_625_1574_2180_1                 | 108    | endothelin-converting enzyme 1 isoform x2           | 727  | 0         | 65.10% | 0.1     | IPR018497 (PRINTS); G3DSA:1.10.1380.10 (GENE3D); IPR008753 (PFAM); IPR018497 (PFAM); IPR000718 (PANTHER); IPR029733 (PTHR11733:PANTHER); TRANSMEMBRANE (PHOBIUS); NON_CYTOPLASMIC_DOMAIN (PHOBIUS); CYTOPLASMIC_DOMAIN (PHOBIUS); SSF55486 (SUPERFAMILY); TMhelix (TMHMM)                                                                                                                                                                                                                                                                               |



|      |                                                              |     |                                                                                                                                                                           |     |           |        |       |                                                                                                                                                                                                                                                                                                                                                                                                                                                                                                                                                                                                                                                                                                                            |
|------|--------------------------------------------------------------|-----|---------------------------------------------------------------------------------------------------------------------------------------------------------------------------|-----|-----------|--------|-------|----------------------------------------------------------------------------------------------------------------------------------------------------------------------------------------------------------------------------------------------------------------------------------------------------------------------------------------------------------------------------------------------------------------------------------------------------------------------------------------------------------------------------------------------------------------------------------------------------------------------------------------------------------------------------------------------------------------------------|
| 1107 | c28738_g1_i1_len_1607_path_1585_0_1606_2                     | 194 | acetylcholine receptor subunit alpha-type acr-16                                                                                                                          | 535 | 7.59E-112 | 59.90% | 0.175 | IPR006201 (PRINTS); IPR027361 (G3DSA:1.20.120.GENE3D); IPR006029 (PFAM); IPR006202 (PFAM); IPR006202 (G3DSA:2.70.170.GENE3D); IPR006201 (PANTHER); PTHR18945:SF490 (PANTHER); TRANSMEMBRANE (PHOBIUS); NON_CYTOPLASMIC_DOMAIN (PHOBIUS); CYTOPLASMIC_DOMAIN (PHOBIUS); TRANSMEMBRANE (PHOBIUS); TRANSMEMBRANE (PHOBIUS); CYTOPLASMIC_DOMAIN (PHOBIUS); NON_CYTOPLASMIC_DOMAIN (PHOBIUS); TRANSMEMBRANE (PHOBIUS); CYTOPLASMIC_DOMAIN (PHOBIUS); IPR006202 (SUPERFAMILY); IPR006029 (SUPERFAMILY); TMhelix (TMHMM); TMhelix (TMHMM); TMhelix (TMHMM); TMhelix (TMHMM)                                                                                                                                                       |
| 1108 | c2879_g1_i1_len_1213_path_1_0_588_590_589_1212_2             | 291 | protein enhancer of sevenless 2b                                                                                                                                          | 404 | 4.02E-139 | 96.00% | 0.152 | IPR000980 (PRINTS); IPR001452 (PRINTS); PR00499 (PRINTS); IPR001452 (SMART); IPR000980 (SMART); IPR000980 (PFAM); IPR000980 (G3DSA:3.30.505.GENE3D); IPR001452 (PFAM); G3DSA:2.30.30.40 (GENE3D); G3DSA:2.30.30.40 (GENE3D); IPR001452 (PFAM); PTHR22820 (PANTHER); TRANSMEMBRANE (PHOBIUS); TRANSMEMBRANE (PHOBIUS); NON_CYTOPLASMIC_DOMAIN (PHOBIUS); CYTOPLASMIC_DOMAIN (PHOBIUS); CYTOPLASMIC_DOMAIN (PHOBIUS); CYTOPLASMIC_DOMAIN (PHOBIUS); TRANSMEMBRANE (PHOBIUS); TRANSMEMBRANE (PHOBIUS); IPR001452 (PROSITE_PROFILES); IPR000980 (PROSITE_PROFILES); IPR001452 (PROSITE_PROFILES); IPR001452 (SUPERFAMILY); IPR001452 (SUPERFAMILY); IPR000980 (SUPERFAMILY); TMhelix (TMHMM); TMhelix (TMHMM); TMhelix (TMHMM) |
| 1109 | c28820_g1_i1_len_264_path_53_0_105_619_106_147_201_148_263_1 | 9   | venom protein a3ym10cm1                                                                                                                                                   | 88  | 1.32E-08  | 65.20% | 0.321 | IPR018155 (PFAM); IPR013785 (G3DSA:3.20.20.GENE3D); SIGNAL_PEPTIDE_H_REGION (PHOBIUS); SIGNAL_PEPTIDE (PHOBIUS); SIGNAL_PEPTIDE_N_REGION (PHOBIUS); NON_CYTOPLASMIC_DOMAIN (PHOBIUS); SIGNAL_PEPTIDE_C_REGION (PHOBIUS); IPR017853 (SUPERFAMILY); TMhelix (TMHMM)                                                                                                                                                                                                                                                                                                                                                                                                                                                          |
| 1110 | c28863_g1_i1_len_366_path_555_0_322_25_323_365_3             | 10  | prostaglandin f synthase-like                                                                                                                                             | 122 | 2.88E-35  | 74.50% | 0.115 | IPR020471 (PRINTS); IPR023210 (G3DSA:3.20.20.GENE3D); IPR023210 (PFAM); PTHR11732:SF133 (PANTHER); IPR001395 (PANTHER); IPR023210 (SUPERFAMILY)                                                                                                                                                                                                                                                                                                                                                                                                                                                                                                                                                                            |
| 1111 | c28863_g1_i2_len_490_path_555_0_322_877_323_489_4            | 16  | aldo-keto reductase                                                                                                                                                       | 163 | 9.05E-42  | 73.30% | 0.185 | IPR020471 (PRINTS); IPR023210 (G3DSA:3.20.20.GENE3D); IPR023210 (PFAM); IPR001395 (PANTHER); PTHR11732:SF133 (PANTHER); IPR023210 (SUPERFAMILY)                                                                                                                                                                                                                                                                                                                                                                                                                                                                                                                                                                            |
| 1112 | c28908_g1_i1_len_1511_path_1_0_1510_2                        | 61  | alcohol dehydrogenase                                                                                                                                                     | 503 | 1.40E-103 | 66.70% | 0.104 | IPR020471 (PRINTS); IPR023210 (PFAM); IPR023210 (G3DSA:3.20.20.GENE3D); IPR001395 (PANTHER); PTHR11732:SF183 (PANTHER); IPR018170 (PROSITE_PATTERNS); IPR018170 (PROSITE_PATTERNS); IPR018170 (PROSITE_PATTERNS); NON_CYTOPLASMIC_DOMAIN (PHOBIUS); TRANSMEMBRANE (PHOBIUS); CYTOPLASMIC_DOMAIN (PHOBIUS); TRANSMEMBRANE (PHOBIUS); TRANSMEMBRANE (PHOBIUS); NON_CYTOPLASMIC_DOMAIN (PHOBIUS); CYTOPLASMIC_DOMAIN (PHOBIUS); IPR023210 (SUPERFAMILY); TMhelix (TMHMM); TMhelix (TMHMM)                                                                                                                                                                                                                                     |
| 1113 | c28969_g1_i1_len_589_path_649_0_565_125_1_566_588_4          | 121 | fatty acid binding protein                                                                                                                                                | 196 | 3.87E-54  | 75.10% | 0.157 | IPR000463 (PRINTS); IPR000566 (PFAM); IPR012674 (G3DSA:2.40.128.GENE3D); PTHR11955 (PANTHER); IPR000463 (PROSITE_PATTERNS); IPR011038 (SUPERFAMILY)                                                                                                                                                                                                                                                                                                                                                                                                                                                                                                                                                                        |
| 1114 | c28974_g1_i1_len_630_path_1_0_629_5                          | 33  | gamma-glutamyl hydrolase a-like isoform x3                                                                                                                                | 210 | 3.05E-42  | 60.50% | 0.108 | IPR029062 (G3DSA:3.40.50.GENE3D); IPR015527 (PANTHER); IPR015527 (PROSITE_PROFILES); IPR029062 (SUPERFAMILY)                                                                                                                                                                                                                                                                                                                                                                                                                                                                                                                                                                                                               |
| 1115 | c28974_g2_i1_len_284_path_1663_0_283_5                       | 1   | gamma-glutamyl hydrolase                                                                                                                                                  | 94  | 3.13E-30  | 71.30% | 0.115 | IPR011697 (PFAM); IPR029062 (G3DSA:3.40.50.GENE3D); PTHR11315:SF2 (PANTHER); IPR015527 (PANTHER); IPR015527 (PROSITE_PROFILES); IPR029062 (SUPERFAMILY)                                                                                                                                                                                                                                                                                                                                                                                                                                                                                                                                                                    |
| 1116 | c28988_g2_i1_len_329_path_1075_0_328_5                       | 7   | inversin- partial                                                                                                                                                         | 109 | 8.84E-31  | 71.10% | 0.133 | IPR002110 (SMART); IPR020683 (G3DSA:1.25.40.GENE3D); IPR020683 (PFAM); PTHR24178 (PANTHER); IPR020683 (PROSITE_PROFILES); IPR002110 (PROSITE_PROFILES); IPR002110 (PROSITE_PROFILES); IPR020683 (SUPERFAMILY)                                                                                                                                                                                                                                                                                                                                                                                                                                                                                                              |
| 1117 | c28994_g1_i1_len_598_path_576_0_597_3                        | 29  | zinc finger protein 271 (zinc finger protein 7) (zinc finger protein znfphe133) (epstein-barr virus-induced zinc finger protein) (znf-eb) (ct-zfp48) (zinc finger protein | 200 | 7.81E-18  | 55.60% | 0.108 | IPR015880 (SMART); IPR013087 (G3DSA:3.30.160.GENE3D); IPR013087 (G3DSA:3.30.160.GENE3D); IPR007087 (PFAM); PF13465 (PFAM); PF13894 (PFAM); PTHR24409 (PANTHER); PTHR24409:SF13 (PANTHER); IPR007087 (PROSITE_PATTERNS); IPR007087 (PROSITE_PATTERNS); IPR007087 (PROSITE_PATTERNS); TRANSMEMBRANE (PHOBIUS); NON_CYTOPLASMIC_DOMAIN (PHOBIUS); CYTOPLASMIC_DOMAIN (PHOBIUS); IPR007087 (PROSITE_PROFILES); IPR007087 (PROSITE_PROFILES); IPR007087 (PROSITE_PROFILES); SSF57667 (SUPERFAMILY); SSF57667 (SUPERFAMILY)                                                                                                                                                                                                      |

|      |                                                                                                       |     |                                                                       |     |          |        |         |                                                                                                                                                                                                                                                                                                                                                                                                                                                                                                                                                                                           |
|------|-------------------------------------------------------------------------------------------------------|-----|-----------------------------------------------------------------------|-----|----------|--------|---------|-------------------------------------------------------------------------------------------------------------------------------------------------------------------------------------------------------------------------------------------------------------------------------------------------------------------------------------------------------------------------------------------------------------------------------------------------------------------------------------------------------------------------------------------------------------------------------------------|
| 1118 | c28994_g2_i1_len_283_path_1199_0_282_2                                                                | 2   | zinc finger protein partial                                           | 94  | 6.71E-16 | 61.00% | 0.099   | IPR015880 (SMART); IPR013087 (G3DSA:3.30.160.GENE3D); PF13465 (PFAM); IPR013087 (G3DSA:3.30.160.GENE3D); PTHR24409 (PANTHER); PTHR24409:SF14 (PANTHER); IPR007087 (PROSITE_PATTERNS); IPR007087 (PROSITE_PATTERNS); IPR007087 (PROSITE_PROFILES); IPR007087 (PROSITE_PROFILES); IPR007087 (PROSITE_PROFILES); SSF57667 (SUPERFAMILY)                                                                                                                                                                                                                                                      |
| 1119 | c29051_g1_i1_len_551_path_375_0_15_374_16_518_115_519_521_761_522_526_767_527_534_767_535_542_767_5_0 | 153 | possible rna polymerase sigma factor                                  | 184 | 7.47E-14 | 51.33% | 0.356Y  | SIGNAL_PEPTIDE_N_REGION (PHOBIUS); SIGNAL_PEPTIDE (PHOBIUS); NON_CYTOPLASMIC_DOMAIN (PHOBIUS); SIGNAL_PEPTIDE_H_REGION (PHOBIUS); SIGNAL_PEPTIDE_C_REGION (PHOBIUS); TMhelix (TMHMM)                                                                                                                                                                                                                                                                                                                                                                                                      |
| 1120 | c29088_g1_i1_len_1990_path_1968_0_1989_2                                                              | 156 | protein unc-13 homolog c                                              | 663 | 1.24E-16 | 54.30% | 0.111   | IPR029334 (PFAM)                                                                                                                                                                                                                                                                                                                                                                                                                                                                                                                                                                          |
| 1121 | c29116_g1_i1_len_1744_path_8_0_1743_2                                                                 | 151 | 15-hydroxyprostaglandin dehydrogenase                                 | 581 | 2.85E-50 | 60.10% | 0.783 Y | IPR002198 (PRINTS); IPR002347 (PRINTS); IPR002198 (PFAM); IPR016040 (G3DSA:3.40.50.GENE3D); PTHR24310 (PANTHER); IPR020904 (PROSITE_PATTERNS); SIGNAL_PEPTIDE_N_REGION (PHOBIUS); SIGNAL_PEPTIDE (PHOBIUS); SIGNAL_PEPTIDE_C_REGION (PHOBIUS); SIGNAL_PEPTIDE_H_REGION (PHOBIUS); NON_CYTOPLASMIC_DOMAIN (PHOBIUS); SignalP-noTM (SIGNALP_GRAM_NEGATIVE); SignalP-TM (SIGNALP_GRAM_POSITIVE); SignalP-noTM (SIGNALP_EUK); SSF51735 (SUPERFAMILY)                                                                                                                                          |
| 1122 | c29139_g1_i1_len_1023_path_1001_0_1022_4                                                              | 74  | carbonic anhydrase                                                    | 341 | 1.84E-59 | 71.70% | 0.106   | IPR001148 (SMART); IPR001148 (PFAM); IPR001148 (G3DSA:3.10.200.GENE3D); IPR023561 (PANTHER); IPR018338 (PROSITE_PATTERNS); IPR001148 (PROSITE_PROFILES); IPR001148 (SUPERFAMILY)                                                                                                                                                                                                                                                                                                                                                                                                          |
| 1123 | c29139_g2_i1_len_924_path_2902_0_923_0                                                                | 44  | carbonic anhydrase 1                                                  | 308 | 9.31E-35 | 68.20% | 0.136   | IPR001148 (SMART); IPR001148 (PFAM); IPR001148 (G3DSA:3.10.200.GENE3D); IPR023561 (PANTHER); IPR001148 (PROSITE_PROFILES); IPR001148 (SUPERFAMILY)                                                                                                                                                                                                                                                                                                                                                                                                                                        |
| 1124 | c29140_g1_i1_len_370_path_1_0_369_3                                                                   | 10  | limbic system-associated membrane protein                             | 124 | 1.63E-35 | 68.70% | 0.098   | IPR013783 (G3DSA:2.60.40.GENE3D); IPR013098 (PFAM); IPR013783 (G3DSA:2.60.40.GENE3D); PTHR19831 (PANTHER); PTHR19831:SF47 (PANTHER); IPR007110 (PROSITE_PROFILES); SSF48726 (SUPERFAMILY); SSF48726 (SUPERFAMILY)                                                                                                                                                                                                                                                                                                                                                                         |
| 1125 | c29140_g2_i1_len_880_path_1600_0_879_0                                                                | 36  | limbic system-associated membrane protein                             | 294 | 6.67E-81 | 66.90% | 0.111   | IPR003599 (SMART); IPR003598 (SMART); IPR003961 (PFAM); IPR013098 (PFAM); IPR013783 (G3DSA:2.60.40.GENE3D); IPR013783 (G3DSA:2.60.40.GENE3D); PTHR19831 (PANTHER); PTHR19831:SF45 (PANTHER); IPR007110 (PROSITE_PROFILES); IPR003961 (PROSITE_PROFILES); IPR003961 (SUPERFAMILY); SSF48726 (SUPERFAMILY)                                                                                                                                                                                                                                                                                  |
| 1127 | c2915_g1_i1_len_643_path_51_0_39_25_40_642_1                                                          | 33  | von willebrand factor a domain-containing protein 8-like              | 214 | 7.73E-54 | 79.00% | 0.113   | IPR011704 (PFAM); PTHR21610:SF9 (PANTHER); PTHR21610 (PANTHER)                                                                                                                                                                                                                                                                                                                                                                                                                                                                                                                            |
| 1128 | c2915_g1_i2_len_679_path_51_0_39_90_40_75_25_76_678_1                                                 | 59  | von willebrand factor a domain-containing protein 8-like              | 226 | 9.46E-54 | 79.00% | 0.122   | IPR011704 (PFAM); PTHR21610:SF9 (PANTHER); PTHR21610 (PANTHER)                                                                                                                                                                                                                                                                                                                                                                                                                                                                                                                            |
| 1126 | c29152_g1_i1_len_1203_path_1181_0_1202_4                                                              | 87  | mam and ldl-receptor class a domain-containing protein c10orf112-like | 401 | 1.87E-07 | 51.00% | 0.108   | IPR000998 (SMART); IPR000998 (PFAM); PTHR23282 (PANTHER); NON_CYTOPLASMIC_DOMAIN (PHOBIUS); CYTOPLASMIC_DOMAIN (PHOBIUS); TRANSMEMBRANE (PHOBIUS); IPR000998 (PROSITE_PROFILES); IPR013320 (SUPERFAMILY); TMhelix (TMHMM)                                                                                                                                                                                                                                                                                                                                                                 |
| 1129 | c29185_g1_i1_len_657_path_53_0_157_211_158_656_4                                                      | 22  | zinc finger protein 431-like isoform x2                               | 219 | 3.96E-38 | 62.60% | 0.106   | IPR015880 (SMART); PF13465 (PFAM); PF13912 (PFAM); IPR013087 (G3DSA:3.30.160.GENE3D); IPR013087 (G3DSA:3.30.160.GENE3D); PTHR24409 (PANTHER); IPR007087 (PROSITE_PATTERNS); IPR007087 (PROSITE_PATTERNS); IPR007087 (PROSITE_PATTERNS); IPR007087 (PROSITE_PROFILES); IPR007087 (PROSITE_PROFILES); IPR007087 (PROSITE_PROFILES); IPR007087 (PROSITE_PROFILES); SSF57667 (SUPERFAMILY); SSF57667 (SUPERFAMILY)                                                                                                                                                                            |
| 1130 | c29185_g1_i2_len_890_path_371_0_390_211_391_889_4                                                     | 43  | zinc finger protein                                                   | 297 | 6.59E-48 | 57.30% | 0.106   | IPR015880 (SMART); IPR013087 (G3DSA:3.30.160.GENE3D); IPR013087 (G3DSA:3.30.160.GENE3D); PF13465 (PFAM); IPR007087 (PFAM); IPR013087 (G3DSA:3.30.160.GENE3D); PTHR24409:SF13 (PANTHER); PTHR24409 (PANTHER); IPR007087 (PROSITE_PATTERNS); IPR007087 (PROSITE_PATTERNS); IPR007087 (PROSITE_PATTERNS); IPR007087 (PROSITE_PATTERNS); IPR007087 (PROSITE_PATTERNS); IPR007087 (PROSITE_PROFILES); IPR007087 (PROSITE_PROFILES); IPR007087 (PROSITE_PROFILES); IPR007087 (PROSITE_PROFILES); SSF57667 (SUPERFAMILY); SSF57667 (SUPERFAMILY); SSF57667 (SUPERFAMILY); SSF57667 (SUPERFAMILY) |

|      |                                                                                                  |       |                                                                        |     |           |        |        |                                                                                                                                                                                                                                                                                                                                                                                                                                                                                                                                                                                                                                                          |
|------|--------------------------------------------------------------------------------------------------|-------|------------------------------------------------------------------------|-----|-----------|--------|--------|----------------------------------------------------------------------------------------------------------------------------------------------------------------------------------------------------------------------------------------------------------------------------------------------------------------------------------------------------------------------------------------------------------------------------------------------------------------------------------------------------------------------------------------------------------------------------------------------------------------------------------------------------------|
| 1131 | c29219_g1_i1_len_1473_path_47_0_235_46_236_1472_2                                                | 129   | insulin-like growth factor-binding protein complex acid labile subunit | 491 | 4.95E-74  | 56.30% | 0.14   | SM00365 (SMART); IPR003591 (SMART); IPR001611 (PFAM); G3DSA:3.80.10.10 (GENE3D); IPR001611 (PFAM); PTHR24365 (PANTHER); IPR001611 (PROSITE_PROFILES); SSF52058 (SUPERFAMILY)                                                                                                                                                                                                                             |
| 1132 | c29308_g1_i1_len_1110_path_1088_0_1109_3                                                         | 497   | steroid dehydrogenase                                                  | 370 | 1.46E-116 | 68.80% | 0.181  | Coil (COILS); IPR002198 (PRINTS); IPR002347 (PRINTS); IPR002198 (PIRSF); IPR016040 (G3DSA:3.40.50.GENE3D); IPR002198 (PFAM); PTHR24316:SF68 (PANTHER); PTHR24316 (PANTHER); TRANSMEMBRANE (PHOBIUS); NON_CYTOPLASMIC_DOMAIN (PHOBIUS); CYTOPLASMIC_DOMAIN (PHOBIUS); TRANSMEMBRANE (PHOBIUS); CYTOPLASMIC_DOMAIN (PHOBIUS); TRANSMEMBRANE (PHOBIUS); NON_CYTOPLASMIC_DOMAIN (PHOBIUS); SSF51735 (SUPERFAMILY); TMhelix (TMHMM)                                                                                                                                                                                                                           |
| 1133 | c29342_g1_i1_len_2569_path_1_0_153_155_154_2568_1                                                | 26451 | enolase isoform x2                                                     | 856 | 0         | 89.70% | 0.27   | IPR000941 (PRINTS); IPR000941 (TIGRFAM); IPR029065 (G3DSA:3.20.20.GENE3D); IPR020811 (PFAM); IPR029017 (G3DSA:3.30.390.GENE3D); IPR020810 (PFAM); IPR000941 (PANTHER); IPR020809 (PROSITE_PATTERNS); NON_CYTOPLASMIC_DOMAIN (PHOBIUS); TRANSMEMBRANE (PHOBIUS); TRANSMEMBRANE (PHOBIUS); CYTOPLASMIC_DOMAIN (PHOBIUS); CYTOPLASMIC_DOMAIN (PHOBIUS); TRANSMEMBRANE (PHOBIUS); TRANSMEMBRANE (PHOBIUS); TRANSMEMBRANE (PHOBIUS); NON_CYTOPLASMIC_DOMAIN (PHOBIUS); NON_CYTOPLASMIC_DOMAIN (PHOBIUS); CYTOPLASMIC_DOMAIN (PHOBIUS); IPR000941 (HAMAP); IPR029017 (SUPERFAMILY); IPR029065 (SUPERFAMILY); TMhelix (TMHMM); TMhelix (TMHMM); TMhelix (TMHMM) |
| 1134 | c29342_g1_i2_len_2505_path_2842_0_89_155_90_2504_0                                               | 27238 | enolase isoform x2                                                     | 835 | 0         | 89.70% | 0.105  | IPR000941 (PRINTS); IPR020811 (PFAM); IPR029017 (G3DSA:3.30.390.GENE3D); IPR000941 (TIGRFAM); IPR020810 (PFAM); IPR029065 (G3DSA:3.20.20.GENE3D); IPR000941 (PANTHER); IPR020809 (PROSITE_PATTERNS); NON_CYTOPLASMIC_DOMAIN (PHOBIUS); CYTOPLASMIC_DOMAIN (PHOBIUS); TRANSMEMBRANE (PHOBIUS); CYTOPLASMIC_DOMAIN (PHOBIUS); TRANSMEMBRANE (PHOBIUS); NON_CYTOPLASMIC_DOMAIN (PHOBIUS); TRANSMEMBRANE (PHOBIUS); NON_CYTOPLASMIC_DOMAIN (PHOBIUS); TRANSMEMBRANE (PHOBIUS); IPR000941 (HAMAP); IPR029065 (SUPERFAMILY); IPR029017 (SUPERFAMILY); TMhelix (TMHMM); TMhelix (TMHMM); TMhelix (TMHMM)                                                        |
| 1135 | c29374_g2_i1_len_1398_path_1376_0_890_2267_891_1397_2                                            | 48    | b-cell lymphoma 3-encoded protein                                      | 466 | 4.57E-44  | 55.40% | 0.134  | IPR002110 (SMART); IPR020683 (G3DSA:1.25.40.GENE3D); IPR020683 (PFAM); PTHR24198 (PANTHER); IPR020683 (PROSITE_PROFILES); IPR002110 (PROSITE_PROFILES); IPR002110 (PROSITE_PROFILES); IPR002110 (PROSITE_PROFILES); IPR002110 (PROSITE_PROFILES); IPR020683 (SUPERFAMILY)                                                                                                                                                                                                                                                                                                                                                                                |
| 1136 | c29394_g1_i1_len_1365_path_1267_0_469_1735_470_472_1738_473_1066_2332_1067_1215_2332_1216_1364_1 | 201   | follistatin-related protein 1                                          | 455 | 2.85E-86  | 57.40% | 0.839Y | IPR002350 (SMART); IPR011992 (G3DSA:1.10.238.GENE3D); IPR002350 (PFAM); G3DSA:3.30.60.30 (GENE3D); IPR011992 (PFAM); PTHR10913 (PANTHER); PTHR10913:SF38 (PANTHER); IPR018247 (PROSITE_PATTERNS); SIGNAL_PEPTIDE (PHOBIUS); NON_CYTOPLASMIC_DOMAIN (PHOBIUS); SIGNAL_PEPTIDE_C_REGION (PHOBIUS); SIGNAL_PEPTIDE_H_REGION (PHOBIUS); SIGNAL_PEPTIDE_N_REGION (PHOBIUS); IPR002048 (PROSITE_PROFILES); IPR002350 (PROSITE_PROFILES); IPR002048 (PROSITE_PROFILES); SignalP-noTM (SIGNALP_EUK); SSF100895 (SUPERFAMILY); SSF47473 (SUPERFAMILY); SSF57603 (SUPERFAMILY)                                                                                     |
| 1137 | c29492_g3_i1_len_863_path_841_0_862_4                                                            | 31    | periostin- partial                                                     | 288 | 8.26E-24  | 50.40% | 0.135  | IPR000782 (SMART); IPR000782 (G3DSA:2.30.180.GENE3D); IPR000782 (PFAM); PTHR10900 (PANTHER); PTHR10900:SF72 (PANTHER); CYTOPLASMIC_DOMAIN (PHOBIUS); NON_CYTOPLASMIC_DOMAIN (PHOBIUS); TRANSMEMBRANE (PHOBIUS); IPR000782 (PROSITE_PROFILES); IPR000782 (PROSITE_PROFILES); IPR000782 (SUPERFAMILY)                                                                                                                                                                                                                                                                                                                                                      |
| 1138 | c29503_g1_i1_len_366_path_53_0_365_0                                                             | 10    | Aap                                                                    | 122 | 2.42E-14  | 54.20% | 0.134  | no IPS match                                                                                                                                                                                                                                                                                                                                                                                                                                                                                                                                                                                                                                             |
| 1139 | c29503_g1_i1_len_366_path_53_0_365_4                                                             | 10    | collagen alpha-2 chain                                                 | 122 | 1.47E-14  | 60.10% | 0.103  | PTHR24023 (PANTHER); PTHR24023:SF379 (PANTHER)                                                                                                                                                                                                                                                                                                                                                                                                                                                                                                                                                                                                           |
| 1140 | c29503_g2_i1_len_312_path_739_0_311_2                                                            | 14    | collagen alpha-4 chain                                                 | 104 | 2.80E-11  | 58.80% | 0.098  | IPR008160 (PFAM); PTHR24023:SF379 (PANTHER); PTHR24023 (PANTHER)                                                                                                                                                                                                                                                                                                                                                                                                                                                                                                                                                                                         |
| 1141 | c29503_g2_i1_len_312_path_739_0_311_5                                                            | 14    | hypothetical protein, partial                                          | 104 | 4.64E-09  | 45.60% | 0.129  | no IPS match                                                                                                                                                                                                                                                                                                                                                                                                                                                                                                                                                                                                                                             |
| 1142 | c29516_g1_i1_len_800_path_1313_0_799_1                                                           | 51    | laminin subunit gamma- partial                                         | 267 | 7.78E-64  | 63.40% | 0.104  | Coil (COILS); Coil (COILS); Coil (COILS); Coil (COILS); SSF58104 (SUPERFAMILY)                                                                                                                                                                                                                                                                                                                                                                                                                                                                                                                                                                           |

|      |                                                                      |     |                                                  |      |           |        |        |                                                                                                                                                                                                                                                                                                                                                                                                                                                                                                                                                                                                                                                                                |
|------|----------------------------------------------------------------------|-----|--------------------------------------------------|------|-----------|--------|--------|--------------------------------------------------------------------------------------------------------------------------------------------------------------------------------------------------------------------------------------------------------------------------------------------------------------------------------------------------------------------------------------------------------------------------------------------------------------------------------------------------------------------------------------------------------------------------------------------------------------------------------------------------------------------------------|
| 1143 | c29516_g2_i1_len_679_path_657_0_678_1                                | 27  | laminin a                                        | 226  | 1.61E-86  | 73.60% | 0.101  | Coil (COILS); Coil (COILS); PR00011 (PRINTS); IPR002049 (SMART); G3DSA:2.10.25.10 (GENE3D); IPR002049 (PFAM); PTHR10574:SF231 (PANTHER); PTHR10574 (PANTHER); IPR002049 (PROSITE_PATTERNS); IPR002049 (PROSITE_PATTERNS); IPR002049 (PROSITE_PROFILES); IPR002049 (PROSITE_PROFILES); IPR002049 (PROSITE_PROFILES); SSF57196 (SUPERFAMILY); SSF57196 (SUPERFAMILY)                                                                                                                                                                                                                                                                                                             |
| 1144 | c29549_g2_i1_len_1958_path_1653_0_1957_2                             | 122 | bone morphogenetic protein receptor type-1b-like | 652  | 0         | 76.00% | 0.598Y | IPR003605 (SMART); IPR002290 (SMART); IPR000719 (PFAM); IPR000472 (PFAM); G3DSA:2.10.60.10 (GENE3D); G3DSA:1.10.510.10 (GENE3D); G3DSA:3.30.200.20 (GENE3D); IPR003605 (PFAM); PTHR23255:SF53 (PANTHER); IPR000333 (PANTHER); IPR008271 (PROSITE_PATTERNS); IPR017441 (PROSITE_PATTERNS); NON_CYTOPLASMIC_DOMAIN (PHOBIUS); SIGNAL_PEPTIDE (PHOBIUS); SIGNAL_PEPTIDE_C_REGION (PHOBIUS); SIGNAL_PEPTIDE_H_REGION (PHOBIUS); TRANSMEMBRANE (PHOBIUS); CYTOPLASMIC_DOMAIN (PHOBIUS); SIGNAL_PEPTIDE_N_REGION (PHOBIUS); IPR000719 (PROSITE_PROFILES); IPR003605 (PROSITE_PROFILES); SignalP-noTM (SIGNALP_EUK); SSF57302 (SUPERFAMILY); IPR011009 (SUPERFAMILY); TMhelix (TMHMM) |
| 1145 | c29556_g1_i1_len_1253_path_53_0_1252_2                               | 69  | apolipoprotein partial                           | 417  | 7.05E-86  | 55.00% | 0.186  | PR00018 (PRINTS); IPR000001 (SMART); G3DSA:2.40.20.10 (GENE3D); IPR000001 (PFAM); PTHR24259 (PANTHER); PTHR24259:SF70 (PANTHER); IPR018056 (PROSITE_PATTERNS); IPR018056 (PROSITE_PATTERNS); IPR018056 (PROSITE_PATTERNS); IPR000001 (PROSITE_PROFILES); IPR000001 (PROSITE_PROFILES); IPR000001 (PROSITE_PROFILES); IPR000001 (PROSITE_PROFILES); IPR013806 (SUPERFAMILY); IPR013806 (SUPERFAMILY)                                                                                                                                                                                                                                                                            |
| 1146 | c29581_g1_i1_len_192_path_516_0_191_3                                | 2   | endothelin-converting enzyme 1 isoform x2        | 64   | 6.63E-23  | 81.20% | 0.266  | IPR024079 (G3DSA:3.40.390.GENE3D); IPR018497 (PFAM); IPR000718 (PANTHER); IPR029733 (PTHR11733:PANTHER); SSF55486 (SUPERFAMILY)                                                                                                                                                                                                                                                                                                                                                                                                                                                                                                                                                |
| 1147 | c29581_g3_i1_len_408_path_1070_0_407_0                               | 7   | endothelin-converting enzyme                     | 136  | 8.50E-76  | 90.60% | 0.118  | IPR018497 (PRINTS); IPR024079 (G3DSA:3.40.390.GENE3D); IPR018497 (PFAM); IPR000718 (PANTHER); IPR029733 (PTHR11733:PANTHER); SSF55486 (SUPERFAMILY)                                                                                                                                                                                                                                                                                                                                                                                                                                                                                                                            |
| 1148 | c29585_g1_i1_len_832_path_1080_0_831_4                               | 54  | carboxypeptidase m isoform x2                    | 277  | 1.19E-44  | 69.90% | 0.201  | IPR014766 (G3DSA:2.60.40.GENE3D); PF13620 (PFAM); PTHR11532 (PANTHER); IPR027062 (PTHR11532:PANTHER); IPR008969 (SUPERFAMILY)                                                                                                                                                                                                                                                                                                                                                                                                                                                                                                                                                  |
| 1149 | c2959_g2_i1_len_393_path_371_0_392_0                                 | 8   | tyrosine kinase receptor cad96ca                 | 131  | 1.78E-66  | 89.00% | 0.171  | IPR001245 (PRINTS); IPR020635 (SMART); G3DSA:1.10.510.10 (GENE3D); IPR001245 (PFAM); PTHR24416 (PANTHER); PTHR24416:SF268 (PANTHER); IPR000719 (PROSITE_PROFILES); IPR011009 (SUPERFAMILY)                                                                                                                                                                                                                                                                                                                                                                                                                                                                                     |
| 1150 | c29615_g1_i1_len_1946_path_1_0_1331_339_0_1332_1571_1333_1572_1945_4 | 125 | isoform cra_d                                    | 649  | 3.31E-39  | 49.10% | 0.121  | PR00018 (PRINTS); IPR000001 (SMART); G3DSA:2.40.20.10 (GENE3D); IPR000001 (PFAM); PTHR24259 (PANTHER); IPR018056 (PROSITE_PATTERNS); IPR018056 (PROSITE_PATTERNS); TRANSMEMBRANE (PHOBIUS); TRANSMEMBRANE (PHOBIUS); TRANSMEMBRANE (PHOBIUS); NON_CYTOPLASMIC_DOMAIN (PHOBIUS); CYTOPLASMIC_DOMAIN (PHOBIUS); NON_CYTOPLASMIC_DOMAIN (PHOBIUS); IPR000001 (PROSITE_PROFILES); IPR000001 (PROSITE_PROFILES); IPR013806 (SUPERFAMILY); IPR013806 (SUPERFAMILY); TMhelix (TMHMM)                                                                                                                                                                                                  |
| 1151 | c29615_g1_i2_len_1706_path_1_0_1331_133_3_1332_1705_4                | 131 | hypothetical protein BRAFLDRAFT_239152           | 569  | 7.60E-17  | 69.40% | 0.121  | PR00018 (PRINTS); IPR000001 (SMART); G3DSA:2.40.20.10 (GENE3D); IPR000001 (PFAM); PTHR24259 (PANTHER); IPR018056 (PROSITE_PATTERNS); TRANSMEMBRANE (PHOBIUS); NON_CYTOPLASMIC_DOMAIN (PHOBIUS); NON_CYTOPLASMIC_DOMAIN (PHOBIUS); CYTOPLASMIC_DOMAIN (PHOBIUS); TRANSMEMBRANE (PHOBIUS); TRANSMEMBRANE (PHOBIUS); IPR000001 (PROSITE_PROFILES); IPR013806 (SUPERFAMILY); TMhelix (TMHMM)                                                                                                                                                                                                                                                                                       |
| 1152 | c29661_g1_i1_len_3116_path_53_0_3115_2                               | 695 | collagen alpha-1 chain isoform x3                | 1038 | 1.08E-107 | 49.80% | 0.159  | IPR002172 (SMART); IPR008160 (PFAM); IPR010515 (PFAM); IPR002172 (PFAM); IPR016186 (G3DSA:3.10.100.GENE3D); IPR002172 (G3DSA:4.10.400.GENE3D); PTHR24023 (PANTHER); IPR023415 (PROSITE_PATTERNS); IPR002172 (PROSITE_PROFILES); IPR016187 (SUPERFAMILY); IPR002172 (SUPERFAMILY)                                                                                                                                                                                                                                                                                                                                                                                               |
| 1153 | c29661_g1_i1_len_3116_path_53_0_3115_4                               | 695 | collagen alpha-2 chain-like isoform x3           | 1039 | 1.00E-35  | 41.90% | 0.099  | PTHR24023:SF405 (PANTHER); PTHR24023 (PANTHER)                                                                                                                                                                                                                                                                                                                                                                                                                                                                                                                                                                                                                                 |
| 1154 | c29687_g2_i1_len_1003_path_317_0_44_362_45_1002_4                    | 28  | serine proteinase                                | 334  | 9.81E-29  | 53.90% | 0.136  | IPR001254 (SMART); G3DSA:2.40.10.10 (GENE3D); G3DSA:2.40.10 (GENE3D); IPR001254 (PFAM); G3DSA:2.40.10.10 (GENE3D); G3DSA:2.40.10.10 (GENE3D); PTHR24268 (PANTHER); PTHR24268:SF81 (PANTHER); IPR001254 (PROSITE_PROFILES); IPR009003 (SUPERFAMILY); IPR009003 (SUPERFAMILY)                                                                                                                                                                                                                                                                                                                                                                                                    |

|      |                                                                                                        |      |                                                     |     |           |        |       |              |                                                                                                                                                                                                                                                                                                                                                                                                                                                                                                                                    |
|------|--------------------------------------------------------------------------------------------------------|------|-----------------------------------------------------|-----|-----------|--------|-------|--------------|------------------------------------------------------------------------------------------------------------------------------------------------------------------------------------------------------------------------------------------------------------------------------------------------------------------------------------------------------------------------------------------------------------------------------------------------------------------------------------------------------------------------------------|
| 1155 | c29688_g1_i1_len_1639_path_89_0_641_53_642_671_53_672_701_53_702_731_2265_73_2_735_28_736_762_28_763_4 | 140  | glutamine-rich protein 2                            | 546 | 5.64E-23  | 44.60% | 0.099 | no IPS match |                                                                                                                                                                                                                                                                                                                                                                                                                                                                                                                                    |
| 1156 | c29688_g1_i3_len_1612_path_89_0_641_53_642_671_53_672_701_53_702_731_2265_73_2_735_28_736_762_28_763_4 | 152  | glutamine-rich protein 2                            | 537 | 1.44E-21  | 44.70% | 0.099 | no IPS match |                                                                                                                                                                                                                                                                                                                                                                                                                                                                                                                                    |
| 1157 | c29740_g1_i1_len_1819_path_53_0_1818_1                                                                 | 107  | thioredoxin domain-containing protein 5             | 606 | 9.21E-168 | 72.20% | 0.292 |              | PR00421 (PRINTS); IPR013766 (PFAM); IPR012336 (G3DSA:3.40.30.GENE3D); IPR012336 (G3DSA:3.40.30.GENE3D); IPR005788 (TIGRFAM); PTHR18929:SF52 (PANTHER); PTHR18929 (PANTHER); IPR017937 (PROSITE_PATTERNS); IPR017937 (PROSITE_PATTERNS); IPR017937 (PROSITE_PATTERNS); CYTOPLASMIC_DOMAIN (PHOBIUS); TRANSMEMBRANE (PHOBIUS); NON_CYTOPLASMIC_DOMAIN (PHOBIUS); IPR012336 (PROSITE_PROFILES); IPR012336 (PROSITE_PROFILES); IPR012336 (PROSITE_PROFILES); IPR012336 (SUPERFAMILY); IPR012336 (SUPERFAMILY); IPR012336 (SUPERFAMILY) |
| 1158 | c29872_g2_i1_len_620_path_715_0_619_1                                                                  | 19   | fibrillin-2 isoform x3                              | 207 | 4.81E-33  | 61.50% | 0.102 |              | IPR003410 (PFAM); PTHR24273:SF29 (PANTHER); PTHR24273 (PANTHER); IPR003410 (PROSITE_PROFILES)                                                                                                                                                                                                                                                                                                                                                                                                                                      |
| 1159 | c29878_g1_i1_len_2946_path_1_0_49_51_50_2945_0                                                         | 711  | beta-mannosidase                                    | 982 | 0         | 63.30% | 0.203 |              | IPR006103 (PFAM); IPR006102 (PFAM); IPR013781 (G3DSA:3.20.20.GENE3D); IPR008979 (G3DSA:2.60.120.GENE3D); IPR013812 (G3DSA:2.60.40.GENE3D); IPR006104 (PFAM); PTHR10066 (PANTHER); IPR028369 (PTHR10066:PANTHER); TRANSMEMBRANE (PHOBIUS); NON_CYTOPLASMIC_DOMAIN (PHOBIUS); CYTOPLASMIC_DOMAIN (PHOBIUS); IPR006102 (SUPERFAMILY); IPR006102 (SUPERFAMILY); IPR006102 (SUPERFAMILY); IPR008979 (SUPERFAMILY); IPR017853 (SUPERFAMILY)                                                                                              |
| 1160 | c29878_g1_i2_len_2931_path_155_0_34_51_35_2930_0                                                       | 714  | beta-mannosidase                                    | 977 | 0         | 63.30% | 0.223 |              | IPR006104 (PFAM); IPR006102 (PFAM); IPR006103 (PFAM); IPR013812 (G3DSA:2.60.40.GENE3D); IPR013781 (G3DSA:3.20.20.GENE3D); IPR008979 (G3DSA:2.60.120.GENE3D); PTHR10066 (PANTHER); IPR028369 (PTHR10066:PANTHER); TRANSMEMBRANE (PHOBIUS); CYTOPLASMIC_DOMAIN (PHOBIUS); NON_CYTOPLASMIC_DOMAIN (PHOBIUS); IPR006102 (SUPERFAMILY); IPR006102 (SUPERFAMILY); IPR017853 (SUPERFAMILY); IPR008979 (SUPERFAMILY); IPR006102 (SUPERFAMILY)                                                                                              |
| 1161 | c29879_g1_i1_len_1522_path_1_0_1260_126_2_1261_1305_3256_1306_1327_1329_1328_1521_4                    | 6271 | serine protease 56                                  | 507 | 6.74E-11  | 43.90% | 0.103 |              | IPR001254 (SMART); G3DSA:2.40.10.10 (GENE3D); NON_CYTOPLASMIC_DOMAIN (PHOBIUS); CYTOPLASMIC_DOMAIN (PHOBIUS); TRANSMEMBRANE (PHOBIUS); IPR001254 (PROSITE_PROFILES); IPR009003 (SUPERFAMILY); TMhelix (TMHMM)                                                                                                                                                                                                                                                                                                                      |
| 1162 | c29881_g1_i1_len_1101_path_1079_0_20_11_00_21_298_1378_299_300_1380_301_1100_2                         | 626  | meprin a subunit beta                               | 367 | 4.72E-51  | 58.20% | 0.368 | Y            | IPR001506 (PRINTS); IPR006026 (SMART); IPR024079 (G3DSA:3.40.390.GENE3D); IPR001506 (PFAM); PTHR10127 (PANTHER); SIGNAL_PEPTIDE_C_REGION (PHOBIUS); SIGNAL_PEPTIDE_H_REGION (PHOBIUS); SIGNAL_PEPTIDE (PHOBIUS); SIGNAL_PEPTIDE_N_REGION (PHOBIUS); NON_CYTOPLASMIC_DOMAIN (PHOBIUS); SSF55486 (SUPERFAMILY); TMhelix (TMHMM)                                                                                                                                                                                                      |
| 1163 | c29881_g1_i2_len_1245_path_2322_0_164_1_100_165_442_1378_443_444_1380_445_12_44_2                      | 622  | meprin a subunit beta                               | 415 | 1.25E-50  | 58.20% | 0.177 |              | IPR001506 (PRINTS); IPR006026 (SMART); IPR024079 (G3DSA:3.40.390.GENE3D); IPR001506 (PFAM); PTHR10127 (PANTHER); SSF55486 (SUPERFAMILY)                                                                                                                                                                                                                                                                                                                                                                                            |
| 1164 | c29900_g1_i1_len_2348_path_2326_0_2347_2                                                               | 575  | pdgf- and vegf-related factor 1-like precursor      | 782 | 7.02E-53  | 55.80% | 0.157 |              | IPR000072 (SMART); IPR000072 (PFAM); IPR029034 (G3DSA:2.10.90.GENE3D); PTHR11633 (PANTHER); PTHR11633:SF1 (PANTHER); NON_CYTOPLASMIC_DOMAIN (PHOBIUS); TRANSMEMBRANE (PHOBIUS); CYTOPLASMIC_DOMAIN (PHOBIUS); CYTOPLASMIC_DOMAIN (PHOBIUS); TRANSMEMBRANE (PHOBIUS); TRANSMEMBRANE (PHOBIUS); IPR000072 (PROSITE_PROFILES); IPR029034 (SUPERFAMILY); TMhelix (TMHMM); TMhelix (TMHMM); TMhelix (TMHMM)                                                                                                                             |
| 1165 | c29953_g1_i1_len_1228_path_1_0_1227_1                                                                  | 51   | vascular endothelial growth factor receptor partial | 409 | 1.13E-27  | 47.20% | 0.125 |              | PR01832 (PRINTS); IPR003599 (SMART); IPR013783 (G3DSA:2.60.40.GENE3D); PF13895 (PFAM); IPR013783 (G3DSA:2.60.40.GENE3D); PTHR15360 (PANTHER); IPR007110 (PROSITE_PROFILES); SSF48726 (SUPERFAMILY); SSF48726 (SUPERFAMILY)                                                                                                                                                                                                                                                                                                         |





|      |                                                                                  |     |                                                    |      |          |        |       |                                                                                                                                                                                                                                                                                                                                                                                                                                                                                                                                                                                                                                                                                                                                                                                                                                                                                                                                                                                                                                                                                                                                                                                                                                                                                                                           |
|------|----------------------------------------------------------------------------------|-----|----------------------------------------------------|------|----------|--------|-------|---------------------------------------------------------------------------------------------------------------------------------------------------------------------------------------------------------------------------------------------------------------------------------------------------------------------------------------------------------------------------------------------------------------------------------------------------------------------------------------------------------------------------------------------------------------------------------------------------------------------------------------------------------------------------------------------------------------------------------------------------------------------------------------------------------------------------------------------------------------------------------------------------------------------------------------------------------------------------------------------------------------------------------------------------------------------------------------------------------------------------------------------------------------------------------------------------------------------------------------------------------------------------------------------------------------------------|
| 1171 | c30008_g3_i1_len_3002_path_771_0_289_73_8_290_322_3763_323_3001_3                | 303 | low-density lipoprotein receptor-related protein 2 | 1001 | 0        | 71.70% | 0.113 | IPR002172 (PRINTS); IPR001881 (SMART); IPR000033 (SMART); IPR002172 (SMART); IPR000742 (SMART); IPR000033 (PFAM); G3DSA:2.10.25.10 (GENE3D); IPR011042 (G3DSA:2.120.10.GENE3D); IPR002172 (G3DSA:4.10.400.GENE3D); G3DSA:2.10.25.10 (GENE3D); IPR001881 (PFAM); IPR002172 (PFAM); G3DSA:4.10.1220.10 (GENE3D); G3DSA:2.10.25.10 (GENE3D); IPR002172 (G3DSA:4.10.400.GENE3D); PTHR10529 (PANTHER); IPR013032 (PROSITE_PATTERNS); IPR023415 (PROSITE_PATTERNS); IPR023415 (PROSITE_PATTERNS); IPR018097 (PROSITE_PATTERNS); CYTOPLASMIC_DOMAIN (PHOBIUS); CYTOPLASMIC_DOMAIN (PHOBIUS); TRANSMEMBRANE (PHOBIUS); TRANSMEMBRANE (PHOBIUS); TRANSMEMBRANE (PHOBIUS); NON_CYTOPLASMIC_DOMAIN (PHOBIUS); TRANSMEMBRANE (PHOBIUS); NON_CYTOPLASMIC_DOMAIN (PHOBIUS); CYTOPLASMIC_DOMAIN (PHOBIUS); NON_CYTOPLASMIC_DOMAIN (PHOBIUS); TRANSMEMBRANE (PHOBIUS); IPR000033 (PROSITE_PROFILES); IPR002172 (PROSITE_PROFILES); IPR000033 (PROSITE_PROFILES); IPR000742 (PROSITE_PROFILES); IPR000033 (PROSITE_PROFILES); IPR002172 (PROSITE_PROFILES); IPR000033 (PROSITE_PROFILES); IPR002172 (PROSITE_PROFILES); IPR002172 (PROSITE_PROFILES); IPR002172 (SUPERFAMILY); IPR002172 (SUPERFAMILY); IPR002172 (SUPERFAMILY); SSF63825 (SUPERFAMILY); IPR002172 (SUPERFAMILY); SSF57196 (SUPERFAMILY); TMhelix (TMHMM); TMhelix (TMHMM) |
| 1172 | c3003_g1_i1_len_541_path_1589_0_540_3                                            | 14  | zinc finger protein ozf-like                       | 181  | 5.05E-26 | 62.20% | 0.103 | IPR015880 (SMART); PF13465 (PFAM); IPR013087 (G3DSA:3.30.160.GENE3D); IPR007087 (PFAM); IPR013087 (G3DSA:3.30.160.GENE3D); PTHR24409 (PANTHER); PTHR24409:SF14 (PANTHER); IPR007087 (PROSITE_PATTERNS); IPR007087 (PROSITE_PATTERNS); IPR007087 (PROSITE_PATTERNS); IPR007087 (PROSITE_PROFILES); IPR007087 (PROSITE_PROFILES); IPR007087 (PROSITE_PROFILES); SSF57667 (SUPERFAMILY); SSF57667 (SUPERFAMILY)                                                                                                                                                                                                                                                                                                                                                                                                                                                                                                                                                                                                                                                                                                                                                                                                                                                                                                              |
| 1173 | c30068_g1_i1_len_1880_path_1_0_352_352_353_1136_1136_1137_1879_0                 | 84  | tbc domain-containing protein kinase-like protein  | 627  | 3.63E-73 | 69.00% | 0.14  | G3DSA:3.30.200.20 (GENE3D); G3DSA:1.10.510.10 (GENE3D); IPR000719 (PFAM); PTHR24362 (PANTHER); CYTOPLASMIC_DOMAIN (PHOBIUS); TRANSMEMBRANE (PHOBIUS); NON_CYTOPLASMIC_DOMAIN (PHOBIUS); IPR000719 (PROSITE_PROFILES); IPR011009 (SUPERFAMILY)                                                                                                                                                                                                                                                                                                                                                                                                                                                                                                                                                                                                                                                                                                                                                                                                                                                                                                                                                                                                                                                                             |
| 1174 | c30068_g1_i2_len_2332_path_1_0_352_352_353_1136_4209_1137_1588_1136_1589_23_31_0 | 104 | tbc domain-containing protein kinase-like protein  | 778  | 0        | 68.50% | 0.14  | G3DSA:1.10.8.270 (GENE3D); G3DSA:3.30.200.20 (GENE3D); G3DSA:1.10.510.10 (GENE3D); IPR000719 (PFAM); IPR000195 (PFAM); PTHR22957:SF22 (PANTHER); PTHR22957 (PANTHER); NON_CYTOPLASMIC_DOMAIN (PHOBIUS); CYTOPLASMIC_DOMAIN (PHOBIUS); TRANSMEMBRANE (PHOBIUS); IPR000195 (PROSITE_PROFILES); IPR000719 (PROSITE_PROFILES); IPR011009 (SUPERFAMILY); IPR000195 (SUPERFAMILY)                                                                                                                                                                                                                                                                                                                                                                                                                                                                                                                                                                                                                                                                                                                                                                                                                                                                                                                                               |
| 1175 | c30140_g1_i1_len_1483_path_1511_0_1318_2830_1319_1482_5                          | 186 | ves g 5 allergen                                   | 494  | 3.93E-44 | 53.20% | 0.167 | IPR002172 (PRINTS); IPR014044 (SMART); IPR002172 (SMART); IPR002172 (G3DSA:4.10.400.GENE3D); IPR014044 (PFAM); IPR014044 (G3DSA:3.40.33.GENE3D); IPR002172 (PFAM); IPR002172 (G3DSA:4.10.400.GENE3D); IPR001283 (PANTHER); IPR023415 (PROSITE_PATTERNS); IPR023415 (PROSITE_PATTERNS); TRANSMEMBRANE (PHOBIUS); NON_CYTOPLASMIC_DOMAIN (PHOBIUS); NON_CYTOPLASMIC_DOMAIN (PHOBIUS); CYTOPLASMIC_DOMAIN (PHOBIUS); IPR002172 (PROSITE_PROFILES); IPR002172 (PROSITE_PROFILES); IPR002172 (PROSITE_PROFILES); IPR002172 (SUPERFAMILY); IPR002172 (SUPERFAMILY); IPR014044 (SUPERFAMILY); IPR002172 (SUPERFAMILY); IPR002172 (SUPERFAMILY)                                                                                                                                                                                                                                                                                                                                                                                                                                                                                                                                                                                                                                                                                   |
| 1176 | c30140_g1_i2_len_1371_path_1511_0_1318_3044_1319_1370_4                          | 139 | ves g 5 allergen                                   | 457  | 6.35E-44 | 53.20% | 0.278 | IPR002172 (PRINTS); IPR002172 (SMART); IPR014044 (SMART); IPR014044 (PFAM); IPR002172 (G3DSA:4.10.400.GENE3D); IPR002172 (PFAM); IPR002172 (G3DSA:4.10.400.GENE3D); IPR014044 (G3DSA:3.40.33.GENE3D); IPR001283 (PANTHER); IPR023415 (PROSITE_PATTERNS); IPR023415 (PROSITE_PATTERNS); IPR023415 (PROSITE_PATTERNS); IPR002172 (PROSITE_PATTERNS); IPR002172 (PROSITE_PROFILES); IPR002172 (PROSITE_PROFILES); IPR002172 (PROSITE_PROFILES); IPR002172 (SUPERFAMILY); IPR002172 (SUPERFAMILY); IPR014044 (SUPERFAMILY); IPR002172 (SUPERFAMILY)                                                                                                                                                                                                                                                                                                                                                                                                                                                                                                                                                                                                                                                                                                                                                                           |

|      |                                                                   |      |                                                 |      |           |        |         |                                                                                                                                                                                                                                                                                                                                                                                                                                                              |
|------|-------------------------------------------------------------------|------|-------------------------------------------------|------|-----------|--------|---------|--------------------------------------------------------------------------------------------------------------------------------------------------------------------------------------------------------------------------------------------------------------------------------------------------------------------------------------------------------------------------------------------------------------------------------------------------------------|
| 1177 | c30156_g1_i1_len_1323_path_1334_0_570_370_571_578_1912_579_1322_1 | 285  | neurofilament triplet h protein                 | 441  | 3.51E-09  | 52.20% | 0.107   | CYTOPLASMIC_DOMAIN (PHOBIUS); NON_CYTOPLASMIC_DOMAIN (PHOBIUS); CYTOPLASMIC_DOMAIN (PHOBIUS); TRANSMEMBRANE (PHOBIUS); TRANSMEMBRANE (PHOBIUS); NON_CYTOPLASMIC_DOMAIN (PHOBIUS); TRANSMEMBRANE (PHOBIUS); TMhelix (TMHMM); TMhelix (TMHMM)                                                                                                                                                                                                                  |
| 1178 | c30180_g1_i1_len_1591_path_53_0_538_592_539_1590_1                | 410  | ddb1- and cul4-associated factor 13-like        | 530  | 0         | 80.80% | 0.099   | IPR001680 (SMART); IPR007287 (PFAM); IPR015943 (G3DSA:2.130.10.GENE3D); IPR001680 (PFAM); PTHR22851:SF0 (PANTHER); PTHR22851 (PANTHER); IPR019775 (PROSITE_PATTERNS); IPR001680 (PROSITE_PROFILES); IPR001680 (PROSITE_PROFILES); IPR017986 (PROSITE_PROFILES); IPR001680 (PROSITE_PROFILES); IPR001680 (PROSITE_PROFILES); IPR017986 (SUPERFAMILY)                                                                                                          |
| 1179 | c30199_g1_i1_len_935_path_51_0_652_25_6_53_934_4                  | 48   | peptidoglycan recognition protein 2 short class | 312  | 2.06E-17  | 64.30% | 0.874 Y | IPR006619 (SMART); IPR002502 (G3DSA:3.40.80.GENE3D); IPR015510 (PANTHER); SIGNAL_PEPTIDE (PHOBIUS); SIGNAL_PEPTIDE_C_REGION (PHOBIUS); CYTOPLASMIC_DOMAIN (PHOBIUS); TRANSMEMBRANE (PHOBIUS); SIGNAL_PEPTIDE_H_REGION (PHOBIUS); NON_CYTOPLASMIC_DOMAIN (PHOBIUS); SIGNAL_PEPTIDE_N_REGION (PHOBIUS); SignalP-noTM (SIGNALP_EUK); IPR002502 (SUPERFAMILY); TMhelix (TMHMM); TMhelix (TMHMM)                                                                  |
| 1180 | c30199_g1_i1_len_935_path_51_0_652_25_6_53_934_5                  | 48   | peptidoglycan recognition protein 1             | 311  | 3.46E-12  | 65.70% | 0.768 Y | IPR002502 (G3DSA:3.40.80.GENE3D); IPR015510 (PANTHER); SIGNAL_PEPTIDE_H_REGION (PHOBIUS); NON_CYTOPLASMIC_DOMAIN (PHOBIUS); SIGNAL_PEPTIDE_C_REGION (PHOBIUS); SIGNAL_PEPTIDE_N_REGION (PHOBIUS); SIGNAL_PEPTIDE (PHOBIUS); SignalP-noTM (SIGNALP_EUK); SignalP-noTM (SIGNALP_GRAM_NEGATIVE); IPR002502 (SUPERFAMILY)                                                                                                                                        |
| 1181 | c30199_g1_i2_len_1054_path_51_0_652_703_653_771_25_772_1053_4     | 84   | peptidoglycan recognition protein 3 short class | 351  | 1.21E-57  | 64.50% | 0.874 Y | IPR006619 (SMART); IPR002502 (SMART); IPR002502 (PFAM); IPR002502 (G3DSA:3.40.80.GENE3D); IPR015510 (PANTHER); SIGNAL_PEPTIDE (PHOBIUS); SIGNAL_PEPTIDE_N_REGION (PHOBIUS); SIGNAL_PEPTIDE_H_REGION (PHOBIUS); SIGNAL_PEPTIDE_C_REGION (PHOBIUS); NON_CYTOPLASMIC_DOMAIN (PHOBIUS); SignalP-noTM (SIGNALP_EUK); IPR002502 (SUPERFAMILY); TMhelix (TMHMM); TMhelix (TMHMM)                                                                                    |
| 1182 | c30201_g1_i1_len_1655_path_3455_0_19_92_20_187_260_188_1654_2     | 336  | wd40 repeat-containing protein partial          | 551  | 0         | 94.20% | 0.098   | IPR020472 (PRINTS); IPR006595 (SMART); IPR001680 (SMART); IPR001680 (PFAM); IPR015943 (G3DSA:2.130.10.GENE3D); PTHR22848 (PANTHER); IPR019775 (PROSITE_PATTERNS); IPR019775 (PROSITE_PATTERNS); IPR001680 (PROSITE_PROFILES); IPR001680 (PROSITE_PROFILES); IPR001680 (PROSITE_PROFILES); IPR001680 (PROSITE_PROFILES); IPR006595 (PROSITE_PROFILES); IPR017986 (PROSITE_PROFILES); IPR017986 (SUPERFAMILY)                                                  |
| 1183 | c30201_g1_i2_len_1726_path_1_0_90_92_91_258_260_259_1725_1        | 364  | wd40 repeat-containing protein smu1             | 575  | 0         | 93.80% | 0.099   | IPR020472 (PRINTS); IPR006595 (SMART); IPR001680 (SMART); IPR006594 (SMART); IPR015943 (G3DSA:2.130.10.GENE3D); IPR001680 (PFAM); PTHR22848 (PANTHER); IPR019775 (PROSITE_PATTERNS); IPR019775 (PROSITE_PATTERNS); IPR001680 (PROSITE_PROFILES); IPR001680 (PROSITE_PROFILES); IPR006594 (PROSITE_PROFILES); IPR006595 (PROSITE_PROFILES); IPR017986 (PROSITE_PROFILES); IPR001680 (PROSITE_PROFILES); IPR001680 (PROSITE_PROFILES); IPR017986 (SUPERFAMILY) |
| 1184 | c30216_g1_i1_len_1365_path_1343_0_1364_2                          | 83   | ubx domain-containing protein 1                 | 455  | 6.32E-127 | 67.30% | 0.467 Y | Coil (COILS); Coil (COILS); IPR001012 (SMART); IPR015940 (SMART); IPR000449 (PFAM); G3DSA:3.10.20.90 (GENE3D); IPR001012 (PFAM); G3DSA:1.10.8.10 (GENE3D); PTHR13020 (PANTHER); PTHR13020:SF25 (PANTHER); IPR007087 (PROSITE_PATTERNS); IPR001012 (PROSITE_PROFILES); IPR007087 (PROSITE_PROFILES); IPR015940 (PROSITE_PROFILES); SignalP-noTM (SIGNALP_EUK); IPR029071 (SUPERFAMILY); IPR009060 (SUPERFAMILY)                                               |
| 1185 | c30221_g1_i1_len_1070_path_16023_0_1069_2                         | 47   | hemocytin                                       | 356  | 1.45E-38  | 45.10% | 0.107   | G3DSA:2.10.25.10 (GENE3D); IPR014853 (PFAM); IPR001846 (PROSITE_PROFILES); IPR001846 (PROSITE_PROFILES); IPR002919 (SUPERFAMILY)                                                                                                                                                                                                                                                                                                                             |
| 1186 | c30221_g2_i1_len_8017_path_37_0_8016_4                            | 3637 | von willebrand factor                           | 2672 | 3.50E-30  | 41.70% | 0.108   | IPR001007 (SMART); PTHR11339 (PANTHER); IPR001007 (PROSITE_PATTERNS); IPR001007 (PROSITE_PATTERNS); PD968187 (PRODOM); IPR001007 (PROSITE_PROFILES); IPR001007 (PROSITE_PROFILES); IPR006207 (PROSITE_PROFILES); IPR001846 (PROSITE_PROFILES)                                                                                                                                                                                                                |

|      |                                                                                        |      |                                                             |      |           |        |       |                                                                                                                                                                                                                                                                                                                                                                                                                                                                                                                                        |
|------|----------------------------------------------------------------------------------------|------|-------------------------------------------------------------|------|-----------|--------|-------|----------------------------------------------------------------------------------------------------------------------------------------------------------------------------------------------------------------------------------------------------------------------------------------------------------------------------------------------------------------------------------------------------------------------------------------------------------------------------------------------------------------------------------------|
| 1187 | c30244_g1_i1_len_3069_path_3097_0_2035_5131_2036_2204_5300_2205_3068_0                 | 2585 | neutral ceramidase                                          | 1023 | 0         | 66.70% | 0.256 | IPR006823 (PFAM); PTHR12670:SF1 (PANTHER); IPR006823 (PANTHER); TRANSMEMBRANE (PHOBIUS); NON_CYTOPLASMIC_DOMAIN (PHOBIUS); CYTOPLASMIC_DOMAIN (PHOBIUS); TRANSMEMBRANE (PHOBIUS); CYTOPLASMIC_DOMAIN (PHOBIUS); TRANSMEMBRANE (PHOBIUS); NON_CYTOPLASMIC_DOMAIN (PHOBIUS)                                                                                                                                                                                                                                                              |
| 1188 | c30244_g1_i2_len_2900_path_3097_0_2035_5300_2036_2899_0                                | 2107 | neutral ceramidase isoform x2                               | 967  | 0         | 67.60% | 0.256 | IPR006823 (PFAM); IPR006823 (PANTHER); PTHR12670:SF1 (PANTHER); CYTOPLASMIC_DOMAIN (PHOBIUS); TRANSMEMBRANE (PHOBIUS); TRANSMEMBRANE (PHOBIUS); NON_CYTOPLASMIC_DOMAIN (PHOBIUS); NON_CYTOPLASMIC_DOMAIN (PHOBIUS)                                                                                                                                                                                                                                                                                                                     |
| 1189 | c30275_g1_i1_len_1100_path_1306_0_695_2_178_696_1099_5                                 | 224  | dehydrogenase reductase sdr family member 4-like isoform x4 | 366  | 7.11E-69  | 75.70% | 0.15  | IPR002198 (PRINTS); IPR002347 (PRINTS); IPR016040 (G3DSA:3.40.50.GENE3D); PF13561 (PFAM); PTHR24322:SF239 (PANTHER); PTHR24322 (PANTHER); IPR020904 (PROSITE_PATTERNS); SSF51735 (SUPERFAMILY)                                                                                                                                                                                                                                                                                                                                         |
| 1190 | c30275_g1_i2_len_1278_path_1306_0_695_2_000_696_873_2178_874_1277_3                    | 503  | dehydrogenase reductase sdr family member 4-like isoform x1 | 426  | 1.40E-106 | 74.40% | 0.136 | IPR002198 (PRINTS); IPR002347 (PRINTS); PF13561 (PFAM); IPR016040 (G3DSA:3.40.50.GENE3D); PTHR24322:SF239 (PANTHER); PTHR24322 (PANTHER); IPR020904 (PROSITE_PATTERNS); SSF51735 (SUPERFAMILY)                                                                                                                                                                                                                                                                                                                                         |
| 1191 | c30508_g1_i1_len_933_path_911_0_932_4                                                  | 46   | calcium calmodulin-dependent protein kinase                 | 311  | 3.49E-124 | 92.10% | 0.117 | IPR008145 (SMART); IPR008145 (PFAM); G3DSA:3.30.63.10 (GENE3D); IPR027417 (G3DSA:3.40.50.GENE3D); PTHR23122 (PANTHER); PTHR23122:SF7 (PANTHER); IPR020590 (PROSITE_PATTERNS); CYTOPLASMIC_DOMAIN (PHOBIUS); TRANSMEMBRANE (PHOBIUS); TRANSMEMBRANE (PHOBIUS); CYTOPLASMIC_DOMAIN (PHOBIUS); NON_CYTOPLASMIC_DOMAIN (PHOBIUS); IPR008144 (PROSITE_PROFILES); IPR027417 (SUPERFAMILY)                                                                                                                                                    |
| 1192 | c30508_g2_i1_len_1068_path_1821_0_1067_1                                               | 26   | peripheral plasma membrane protein cask-like                | 356  | 1.27E-168 | 80.80% | 0.236 | IPR004172 (SMART); IPR000719 (PFAM); IPR001478 (G3DSA:2.30.42.GENE3D); G3DSA:1.10.287.650 (GENE3D); IPR014775 (PFAM); IPR001478 (PFAM); G3DSA:1.10.510.10 (GENE3D); PTHR23122:SF40 (PANTHER); PTHR23122 (PANTHER); TRANSMEMBRANE (PHOBIUS); CYTOPLASMIC_DOMAIN (PHOBIUS); NON_CYTOPLASMIC_DOMAIN (PHOBIUS); IPR000719 (PROSITE_PROFILES); IPR001478 (PROSITE_PROFILES); IPR004172 (PROSITE_PROFILES); IPR004172 (PROSITE_PROFILES); IPR001478 (SUPERFAMILY); IPR011009 (SUPERFAMILY); SSF101288 (SUPERFAMILY); SSF101288 (SUPERFAMILY) |
| 1193 | c30508_g3_i1_len_428_path_4161_0_427_4                                                 | 12   | peripheral plasma membrane protein cask isoform x2          | 143  | 1.49E-86  | 94.50% | 0.107 | IPR001452 (PRINTS); IPR001452 (SMART); G3DSA:2.30.30.40 (GENE3D); IPR011511 (PFAM); PTHR23122:SF7 (PANTHER); PTHR23122 (PANTHER); IPR001452 (PROSITE_PROFILES); IPR001452 (SUPERFAMILY)                                                                                                                                                                                                                                                                                                                                                |
| 1194 | c30512_g1_i1_len_1261_path_1_0_133_1579_134_135_456_136_1260_1                         | 38   | cyclin-dependent kinase 9-like                              | 420  | 0         | 93.50% | 0.135 | IPR002290 (SMART); G3DSA:3.30.200.20 (GENE3D); G3DSA:1.10.510.10 (GENE3D); IPR000719 (PFAM); PTHR24056 (PANTHER); PTHR24056:SF158 (PANTHER); IPR008271 (PROSITE_PATTERNS); CYTOPLASMIC_DOMAIN (PHOBIUS); TRANSMEMBRANE (PHOBIUS); NON_CYTOPLASMIC_DOMAIN (PHOBIUS); IPR000719 (PROSITE_PROFILES); IPR011009 (SUPERFAMILY); TMhelix (TMHMM)                                                                                                                                                                                             |
| 1195 | c30515_g1_i1_len_1395_path_41_0_903_20_904_1394_2                                      | 170  | carboxypeptidase n subunit 2                                | 465  | 1.94E-18  | 41.80% | 0.286 | IPR003591 (SMART); IPR001611 (PFAM); G3DSA:3.80.10.10 (GENE3D); IPR001611 (PFAM); PTHR24365 (PANTHER); TRANSMEMBRANE (PHOBIUS); NON_CYTOPLASMIC_DOMAIN (PHOBIUS); CYTOPLASMIC_DOMAIN (PHOBIUS); IPR001611 (PROSITE_PROFILES); IPR001611 (PROSITE_PROFILES); IPR001611 (PROSITE_PROFILES); IPR001611 (PROSITE_PROFILES); IPR001611 (PROSITE_PROFILES); IPR001611 (PROSITE_PROFILES); SSF52058 (SUPERFAMILY); TMhelix (TMHMM)                                                                                                            |
| 1196 | c30553_g1_i1_len_1007_path_1_0_161_1963_162_281_163_282_729_611_730_742_624_743_1006_4 | 43   | neuroendocrine protein 7b2                                  | 336  | 7.71E-91  | 62.80% | 0.26  | Coil (COILS); IPR007945 (PFAM); PTHR12738:SF0 (PANTHER); IPR007945 (PANTHER); CYTOPLASMIC_DOMAIN (PHOBIUS); NON_CYTOPLASMIC_DOMAIN (PHOBIUS); TRANSMEMBRANE (PHOBIUS)                                                                                                                                                                                                                                                                                                                                                                  |
| 1197 | c30553_g1_i2_len_887_path_1_0_161_163_162_609_611_610_622_624_623_886_4                | 55   | neuroendocrine protein 7b2                                  | 296  | 7.02E-85  | 64.60% | 0.26  | IPR007945 (PFAM); PTHR12738:SF0 (PANTHER); IPR007945 (PANTHER); CYTOPLASMIC_DOMAIN (PHOBIUS); NON_CYTOPLASMIC_DOMAIN (PHOBIUS); TRANSMEMBRANE (PHOBIUS)                                                                                                                                                                                                                                                                                                                                                                                |
| 1198 | c30706_g1_i1_len_1293_path_53_0_9_63_10_1292_4                                         | 85   | protein disulfide-isomerase a4-like                         | 431  | 1.06E-54  | 70.10% | 0.098 | IPR013766 (PFAM); IPR012336 (G3DSA:3.40.30.GENE3D); PTHR18929:SF56 (PANTHER); PTHR18929 (PANTHER); IPR017937 (PROSITE_PATTERNS); IPR012336 (PROSITE_PROFILES); IPR012336 (SUPERFAMILY)                                                                                                                                                                                                                                                                                                                                                 |
| 1199 | c30799_g1_i1_len_1409_path_1563_0_1408_1                                               | 68   | periodic tryptophan protein 2 homolog                       | 470  | 0         | 79.00% | 0.18  | IPR001680 (SMART); IPR007148 (PFAM); IPR015943 (G3DSA:2.130.10.GENE3D); IPR001680 (PFAM); IPR027145 (PANTHER); IPR019775 (PROSITE_PATTERNS); IPR001680 (PROSITE_PROFILES); IPR001680 (PROSITE_PROFILES); IPR017986 (PROSITE_PROFILES); IPR017986 (SUPERFAMILY)                                                                                                                                                                                                                                                                         |

|      |                                                                                                   |     |                                                           |     |           |        |        |                                                                                                                                                                                                                                                                                                                                                                                                                                                                                                                            |
|------|---------------------------------------------------------------------------------------------------|-----|-----------------------------------------------------------|-----|-----------|--------|--------|----------------------------------------------------------------------------------------------------------------------------------------------------------------------------------------------------------------------------------------------------------------------------------------------------------------------------------------------------------------------------------------------------------------------------------------------------------------------------------------------------------------------------|
| 1200 | c30832_g1_i1_len_1867_path_1895_0_1866_0                                                          | 113 | carboxylesterase 4a                                       | 623 | 6.99E-148 | 57.40% | 0.136  | IPR029058 (G3DSA:3.40.50.GENE3D); IPR002018 (PFAM); PTHR11559 (PANTHER); IPR019819 (PROSITE_PATTERNS); IPR019826 (PROSITE_PATTERNS); CYTOPLASMIC_DOMAIN (PHOBIUS); TRANSMEMBRANE (PHOBIUS); TRANSMEMBRANE (PHOBIUS); NON_CYTOPLASMIC_DOMAIN (PHOBIUS); CYTOPLASMIC_DOMAIN (PHOBIUS); IPR029058 (SUPERFAMILY)                                                                                                                                                                                                               |
| 1201 | c30882_g1_i1_len_1647_path_1625_0_1010_3396_1011_1646_2                                           | 91  | laccase-1 isoform x1                                      | 549 | 4.15E-88  | 62.00% | 0.246  | IPR008972 (G3DSA:2.60.40.GENE3D); IPR011706 (PFAM); IPR008972 (G3DSA:2.60.40.GENE3D); PTHR11709 (PANTHER); PTHR11709:SF33 (PANTHER); IPR002355 (PROSITE_PATTERNS); IPR002355 (PROSITE_PATTERNS); IPR008972 (SUPERFAMILY)                                                                                                                                                                                                                                                                                                   |
| 1202 | c30981_g1_i1_len_1348_path_1326_0_1347_4                                                          | 61  | serine threonine-protein kinase 16                        | 449 | 8.39E-144 | 76.90% | 0.457Y | IPR002290 (SMART); G3DSA:1.10.510.10 (GENE3D); IPR000719 (PFAM); G3DSA:3.30.200.20 (GENE3D); PTHR22967 (PANTHER); IPR008271 (PROSITE_PATTERNS); IPR000719 (PROSITE_PROFILES); SignalP-noTM (SIGNALP_EUK); IPR011009 (SUPERFAMILY)                                                                                                                                                                                                                                                                                          |
| 1203 | c31027_g1_i1_len_329_path_1625_0_328_1                                                            | 5   | spondin-1                                                 | 110 | 9.63E-11  | 61.30% | 0.109  | IPR000884 (SMART); G3DSA:2.20.100.10 (GENE3D); IPR000884 (PFAM); PTHR11311:SF11 (PANTHER); PTHR11311 (PANTHER); IPR000884 (PROSITE_PROFILES); IPR000884 (SUPERFAMILY)                                                                                                                                                                                                                                                                                                                                                      |
| 1204 | c31027_g3_i1_len_534_path_750_0_533_0                                                             | 11  | spondin-1                                                 | 178 | 2.81E-50  | 61.80% | 0.11   | IPR002223 (PRINTS); IPR000884 (SMART); IPR002223 (SMART); G3DSA:2.20.100.10 (GENE3D); IPR002223 (G3DSA:4.10.410.GENE3D); IPR002223 (PFAM); IPR000884 (PFAM); PTHR11311:SF11 (PANTHER); PTHR11311 (PANTHER); IPR020901 (PROSITE_PATTERNS); IPR000884 (PROSITE_PROFILES); IPR002223 (PROSITE_PROFILES); IPR000884 (PROSITE_PROFILES); IPR002223 (SUPERFAMILY); IPR000884 (SUPERFAMILY); IPR000884 (SUPERFAMILY)                                                                                                              |
| 1205 | c31054_g1_i1_len_161_path_885_0_160_4                                                             | 1   | allatostatin precursor protein                            | 54  | 1.63E-06  | 84.00% | 0.108  | no IPS match                                                                                                                                                                                                                                                                                                                                                                                                                                                                                                               |
| 1206 | c31054_g2_i1_len_532_path_61_0_411_47_4_12_441_47_442_471_47_472_501_47_502_531_1                 | 27  | allatostatin precursor protein                            | 177 | 1.93E-32  | 59.80% | 0.099  | IPR010276 (PFAM)                                                                                                                                                                                                                                                                                                                                                                                                                                                                                                           |
| 1207 | c31056_g1_i1_len_1109_path_1087_0_73_11_61_74_75_1163_76_1108_2                                   | 733 | eukaryotic translation initiation factor 3 subunit i-like | 369 | 1.11E-180 | 84.20% | 0.113  | IPR001680 (SMART); IPR001680 (PFAM); IPR015943 (G3DSA:2.130.10.GENE3D); PTHR19877 (PANTHER); IPR019775 (PROSITE_PATTERNS); IPR017986 (PROSITE_PROFILES); IPR001680 (PROSITE_PROFILES); IPR017986 (PROSITE_PROFILES); IPR027525 (HAMAP); IPR001680 (PROSITE_PROFILES); IPR001680 (PROSITE_PROFILES); IPR001680 (PROSITE_PROFILES); IPR017986 (SUPERFAMILY)                                                                                                                                                                  |
| 1208 | c31075_g1_i1_len_785_path_787_0_8_796_9_784_3                                                     | 88  | cysteine string protein                                   | 262 | 6.43E-100 | 76.10% | 0.271  | IPR001623 (PRINTS); IPR001623 (SMART); IPR001623 (PFAM); IPR001623 (G3DSA:1.10.287.GENE3D); PTHR24078 (PANTHER); PTHR24078:SF5 (PANTHER); IPR018253 (PROSITE_PATTERNS); IPR001623 (PROSITE_PROFILES); IPR001623 (SUPERFAMILY)                                                                                                                                                                                                                                                                                              |
| 1209 | c31097_g1_i1_len_1707_path_53_0_1637_34_65_1638_1641_1692_1642_1706_0                             | 96  | protein sda1 homolog isoform x2                           | 569 | 0         | 71.50% | 0.209  | IPR007949 (PFAM); IPR027312 (PTHR12730:PANTHER); PTHR12730 (PANTHER); IPR016024 (SUPERFAMILY)                                                                                                                                                                                                                                                                                                                                                                                                                              |
| 1210 | c31104_g1_i2_len_2116_path_2437_0_207_2_645_208_1508_311_1509_1532_3968_1533_1543_346_1544_2115_2 | 573 | agap005124-pc-like protein                                | 705 | 0         | 78.00% | 0.118  | Coil (COILS); IPR016163 (G3DSA:3.40.309.GENE3D); IPR016162 (G3DSA:3.40.605.GENE3D); IPR015590 (PFAM); PTHR11699:SF15 (PANTHER); PTHR11699 (PANTHER); IPR029510 (PROSITE_PATTERNS); NON_CYTOPLASMIC_DOMAIN (PHOBIUS); CYTOPLASMIC_DOMAIN (PHOBIUS); TRANSMEMBRANE (PHOBIUS); IPR016161 (SUPERFAMILY); TMhelix (TMHMM)                                                                                                                                                                                                       |
| 1211 | c31104_g1_i3_len_2030_path_4527_0_121_2_645_122_1422_311_1423_1446_3968_1447_1457_346_1458_2029_0 | 567 | agap005124-pc-like protein                                | 677 | 0         | 78.00% | 0.11   | Coil (COILS); IPR016163 (G3DSA:3.40.309.GENE3D); IPR015590 (PFAM); IPR016162 (G3DSA:3.40.605.GENE3D); PTHR11699 (PANTHER); PTHR11699:SF15 (PANTHER); IPR029510 (PROSITE_PATTERNS); NON_CYTOPLASMIC_DOMAIN (PHOBIUS); CYTOPLASMIC_DOMAIN (PHOBIUS); TRANSMEMBRANE (PHOBIUS); IPR016161 (SUPERFAMILY); TMhelix (TMHMM)                                                                                                                                                                                                       |
| 1212 | c31149_g1_i1_len_2212_path_2190_0_2211_0                                                          | 132 | tl5a_tactr ame: full=techylectin-5a flags: precursor      | 738 | 2.34E-53  | 60.50% | 0.828Y | Coil (COILS); Coil (COILS); IPR002181 (SMART); IPR002181 (PFAM); IPR014715 (G3DSA:4.10.530.GENE3D); IPR014716 (G3DSA:3.90.215.GENE3D); PTHR19143 (PANTHER); IPR020837 (PROSITE_PATTERNS); SIGNAL_PEPTIDE (PHOBIUS); NON_CYTOPLASMIC_DOMAIN (PHOBIUS); SIGNAL_PEPTIDE_H_REGION (PHOBIUS); SIGNAL_PEPTIDE_N_REGION (PHOBIUS); SIGNAL_PEPTIDE_C_REGION (PHOBIUS); IPR002181 (PROSITE_PROFILES); SignalP-noTM (SIGNALP_EUK); SignalP-noTM (SIGNALP_GRAM_NEGATIVE); SignalP-TM (SIGNALP_GRAM_POSITIVE); IPR002181 (SUPERFAMILY) |



|      |                                                                                                   |      |                                                                  |     |           |        |       |                                                                                                                                                                                                                                                                                                                                                                                                                                                                                                                                                                                     |
|------|---------------------------------------------------------------------------------------------------|------|------------------------------------------------------------------|-----|-----------|--------|-------|-------------------------------------------------------------------------------------------------------------------------------------------------------------------------------------------------------------------------------------------------------------------------------------------------------------------------------------------------------------------------------------------------------------------------------------------------------------------------------------------------------------------------------------------------------------------------------------|
| 1213 | c31222_g1_i1_len_684_path_1_0_451_453_452_459_461_460_683_2                                       | 27   | tight junction protein zo-3                                      | 228 | 1.87E-17  | 74.70% | 0.109 | Coil (COILS); IPR001478 (SMART); IPR001478 (PFAM); IPR001478 (G3DSA:2.30.42.GENE3D); PTHR19964 (PANTHER); PTHR19964:SF22 (PANTHER); IPR001478 (PROSITE_PROFILES); IPR001478 (SUPERFAMILY) IPR001199 (PFAM); IPR001199 (G3DSA:3.10.120.GENE3D); PTHR10281:SF25 (PANTHER); PTHR10281 (PANTHER); TRANSMEMBRANE (PHOBIUS); TRANSMEMBRANE (PHOBIUS); NON_CYTOPLASMIC_DOMAIN (PHOBIUS); CYTOPLASMIC_DOMAIN (PHOBIUS); CYTOPLASMIC_DOMAIN (PHOBIUS); TRANSMEMBRANE (PHOBIUS); NON_CYTOPLASMIC_DOMAIN (PHOBIUS); IPR001199 (SUPERFAMILY); TMhelix (TMHMM); TMhelix (TMHMM); TMhelix (TMHMM) |
| 1214 | c31224_g1_i1_len_1074_path_1083_0_296_16_297_1073_2                                               | 106  | membrane-associated progesterone receptor component 1-like       | 358 | 6.86E-74  | 77.20% | 0.155 | IPR000917 (PFAM); IPR017849 (G3DSA:3.40.720.GENE3D); G3DSA:3.30.1120.10 (GENE3D); PTHR10342:SF206 (PANTHER); PTHR10342 (PANTHER); IPR024607 (PROSITE_PATTERNS); IPR024607 (PROSITE_PATTERNS); CYTOPLASMIC_DOMAIN (PHOBIUS); TRANSMEMBRANE (PHOBIUS); CYTOPLASMIC_DOMAIN (PHOBIUS); NON_CYTOPLASMIC_DOMAIN (PHOBIUS); TRANSMEMBRANE (PHOBIUS); NON_CYTOPLASMIC_DOMAIN (PHOBIUS); TRANSMEMBRANE (PHOBIUS); IPR017850 (SUPERFAMILY); TMhelix (TMHMM)                                                                                                                                   |
| 1215 | c31305_g2_i2_len_2325_path_3008_0_2129_5138_2130_2324_1                                           | 378  | arylsulfatase b                                                  | 775 | 1.46E-172 | 64.80% | 0.158 | IPR002126 (SMART); IPR002126 (PFAM); IPR002126 (G3DSA:2.60.40.GENE3D); PTHR24026 (PANTHER); PTHR24026:SF39 (PANTHER); IPR002126 (PROSITE_PROFILES); IPR015919 (SUPERFAMILY) IPR002126 (G3DSA:2.60.40.GENE3D); PTHR24028 (PANTHER); IPR020894 (PROSITE_PATTERNS); IPR002126 (PROSITE_PROFILES); IPR015919 (SUPERFAMILY)                                                                                                                                                                                                                                                              |
| 1216 | c31334_g2_i1_len_237_path_497_0_236_2                                                             | 0    | fat-like cadherin-related tumor suppressor homolog isoform x1    | 79  | 1.95E-21  | 77.10% | 0.101 | IPR001304 (SMART); IPR001304 (PFAM); IPR016186 (G3DSA:3.10.100.GENE3D); PTHR22802 (PANTHER); PTHR22802:SF219 (PANTHER); IPR001304 (PROSITE_PROFILES); IPR016187 (SUPERFAMILY)                                                                                                                                                                                                                                                                                                                                                                                                       |
| 1217 | c31334_g3_i1_len_263_path_711_0_262_3                                                             | 5    | fat-like cadherin-related tumor suppressor homolog isoform x1    | 88  | 1.47E-17  | 67.40% | 0.106 | IPR001464 (PRINTS); IPR018502 (SMART); IPR018502 (PFAM); IPR018502 (G3DSA:1.10.220.GENE3D); IPR018502 (G3DSA:1.10.220.GENE3D); PTHR10502 (PANTHER); IPR018252 (PROSITE_PATTERNS); IPR018252 (PROSITE_PATTERNS); SSF47874 (SUPERFAMILY)                                                                                                                                                                                                                                                                                                                                              |
| 1218 | c31371_g1_i1_len_417_path_1_0_416_2                                                               | 15   | isoform a                                                        | 139 | 7.24E-14  | 56.90% | 0.118 | IPR001464 (PRINTS); IPR018502 (SMART); IPR018502 (PFAM); IPR018502 (G3DSA:1.10.220.GENE3D); IPR018502 (G3DSA:1.10.220.GENE3D); PTHR10502 (PANTHER); IPR018252 (PROSITE_PATTERNS); IPR018252 (PROSITE_PATTERNS); SSF47874 (SUPERFAMILY)                                                                                                                                                                                                                                                                                                                                              |
| 1219 | c31561_g1_i1_len_2005_path_389_0_519_4882_520_521_3401_522_2004_2                                 | 186  | annexin a4                                                       | 668 | 6.41E-92  | 67.60% | 0.102 | IPR001464 (PRINTS); IPR018502 (SMART); IPR018502 (G3DSA:1.10.220.GENE3D); IPR018502 (G3DSA:1.10.220.GENE3D); IPR018502 (G3DSA:1.10.220.GENE3D); PTHR10502 (PANTHER); IPR018252 (PROSITE_PATTERNS); IPR018252 (PROSITE_PATTERNS); SSF47874 (SUPERFAMILY)                                                                                                                                                                                                                                                                                                                             |
| 1220 | c31561_g1_i3_len_1740_path_3145_0_254_4882_255_256_3401_257_1739_1                                | 182  | annexin partial                                                  | 580 | 1.05E-93  | 67.70% | 0.108 | IPR002591 (PFAM); IPR017849 (G3DSA:3.40.720.GENE3D); IPR024873 (PANTHER); NON_CYTOPLASMIC_DOMAIN (PHOBIUS); SIGNAL_PEPTIDE_H_REGION (PHOBIUS); SIGNAL_PEPTIDE (PHOBIUS); TRANSMEMBRANE (PHOBIUS); CYTOPLASMIC_DOMAIN (PHOBIUS); SIGNAL_PEPTIDE_N_REGION (PHOBIUS); TRANSMEMBRANE (PHOBIUS); SIGNAL_PEPTIDE_C_REGION (PHOBIUS); NON_CYTOPLASMIC_DOMAIN (PHOBIUS); TRANSMEMBRANE (PHOBIUS); CYTOPLASMIC_DOMAIN (PHOBIUS); IPR017850 (SUPERFAMILY); TMhelix (TMHMM); TMhelix (TMHMM); TMhelix (TMHMM)                                                                                  |
| 1221 | c31578_g1_i1_len_1846_path_1_0_1845_0                                                             | 1691 | ectonucleotide pyrophosphatase phosphodiesterase family member 6 | 616 | 3.17E-98  | 54.80% | 0.234 | Coil (COILS); IPR002290 (SMART); G3DSA:1.10.510.10 (GENE3D); G3DSA:3.30.200.20 (GENE3D); IPR000719 (PFAM); PTHR24056 (PANTHER); PTHR24056:SF45 (PANTHER); IPR008271 (PROSITE_PATTERNS); IPR000719 (PROSITE_PROFILES); IPR011009 (SUPERFAMILY); SSF101447 (SUPERFAMILY)                                                                                                                                                                                                                                                                                                              |
| 1222 | c31626_g1_i1_len_2651_path_1_0_2328_2330_2329_2334_2336_2335_2491_5086_2492_2493_2336_2494_2650_4 | 342  | serine threonine-protein kinase prp4 homolog                     | 884 | 0         | 74.80% | 0.128 | IPR002290 (SMART); G3DSA:1.10.510.10 (GENE3D); IPR000719 (PFAM); G3DSA:3.30.200.20 (GENE3D); PTHR24054:SF28 (PANTHER); PTHR24054 (PANTHER); IPR017441 (PROSITE_PATTERNS); IPR008271 (PROSITE_PATTERNS); CYTOPLASMIC_DOMAIN (PHOBIUS); NON_CYTOPLASMIC_DOMAIN (PHOBIUS); TRANSMEMBRANE (PHOBIUS); IPR000719 (PROSITE_PROFILES); IPR011009 (SUPERFAMILY); TMhelix (TMHMM)                                                                                                                                                                                                             |
| 1223 | c31647_g1_i1_len_1451_path_1596_0_154_1751_155_1277_2873_1278_1450_5                              | 126  | casein kinase ii subunit alpha                                   | 483 | 0         | 95.00% | 0.155 |                                                                                                                                                                                                                                                                                                                                                                                                                                                                                                                                                                                     |

|      |                                                                                             |      |                                                           |      |           |        |       |                                                                                                                                                                                                                                                                                                                                                                                                                                                                                                                                                                                                                                                                                                                                           |
|------|---------------------------------------------------------------------------------------------|------|-----------------------------------------------------------|------|-----------|--------|-------|-------------------------------------------------------------------------------------------------------------------------------------------------------------------------------------------------------------------------------------------------------------------------------------------------------------------------------------------------------------------------------------------------------------------------------------------------------------------------------------------------------------------------------------------------------------------------------------------------------------------------------------------------------------------------------------------------------------------------------------------|
| 1224 | c31647_g1_i2_len_1597_path_1596_0_154_3_045_155_300_1751_301_1423_2873_1424_1596_5          | 118  | casein kinase ii subunit alpha                            | 532  | 0         | 95.50% | 0.155 | IPR002290 (SMART); IPR000719 (PFAM); G3DSA:1.10.510.10 (GENE3D); G3DSA:3.30.200.20 (GENE3D); PTHR24054 (PANTHER); PTHR24054:SF28 (PANTHER); IPR008271 (PROSITE_PATTERNS); IPR017441 (PROSITE_PATTERNS); CYTOPLASMIC_DOMAIN (PHOBIUS); NON_CYTOPLASMIC_DOMAIN (PHOBIUS); TRANSMEMBRANE (PHOBIUS); IPR000719 (PROSITE_PROFILES); IPR011009 (SUPERFAMILY); TMhelix (TMHMM)                                                                                                                                                                                                                                                                                                                                                                   |
| 1225 | c31647_g1_i3_len_1361_path_1596_0_154_1_751_155_1277_25_1278_1360_5                         | 110  | casein kinase ii subunit alpha                            | 453  | 0         | 94.90% | 0.102 | IPR002290 (SMART); G3DSA:1.10.510.10 (GENE3D); G3DSA:3.30.200.20 (GENE3D); IPR000719 (PFAM); PTHR24054 (PANTHER); PTHR24054:SF28 (PANTHER); IPR017441 (PROSITE_PATTERNS); IPR008271 (PROSITE_PATTERNS); IPR000719 (PROSITE_PROFILES); IPR011009 (SUPERFAMILY)                                                                                                                                                                                                                                                                                                                                                                                                                                                                             |
| 1226 | c31704_g1_i1_len_1198_path_1_0_1197_0                                                       | 46   | complement c1q tumor necrosis factor-related protein 4    | 400  | 2.85E-09  | 43.90% | 0.108 | Coil (COILS); Coil (COILS); IPR001073 (SMART); IPR001073 (PFAM); IPR008983 (G3DSA:2.60.120.GENE3D); PTHR22923 (PANTHER); PTHR22923:SF53 (PANTHER); IPR001073 (PROSITE_PROFILES); IPR001073 (PROSITE_PROFILES); IPR008983 (SUPERFAMILY); IPR008983 (SUPERFAMILY); IPR008983 (SUPERFAMILY)                                                                                                                                                                                                                                                                                                                                                                                                                                                  |
| 1227 | c31725_g1_i1_len_2810_path_2788_0_2809_4                                                    | 316  | angiotensin-converting enzyme-like                        | 937  | 1.12E-162 | 61.70% | 0.247 | Coil (COILS); IPR001548 (PRINTS); IPR001548 (PFAM); IPR001548 (PANTHER); CYTOPLASMIC_DOMAIN (PHOBIUS); NON_CYTOPLASMIC_DOMAIN (PHOBIUS); TRANSMEMBRANE (PHOBIUS); NON_CYTOPLASMIC_DOMAIN (PHOBIUS); TRANSMEMBRANE (PHOBIUS); CYTOPLASMIC_DOMAIN (PHOBIUS); TRANSMEMBRANE (PHOBIUS); TRANSMEMBRANE (PHOBIUS); CYTOPLASMIC_DOMAIN (PHOBIUS); SSF55486 (SUPERFAMILY); TMhelix (TMHMM); TMhelix (TMHMM); TMhelix (TMHMM); TMhelix (TMHMM)                                                                                                                                                                                                                                                                                                     |
| 1228 | c31738_g2_i1_len_287_path_5748_0_198_59_46_199_211_5486_212_223_344_224_247_5_993_248_286_2 | 9    | macrophage mannose receptor 1-like                        | 95   | 5.62E-14  | 57.40% | 0.103 | IPR001304 (SMART); IPR001304 (PFAM); IPR016186 (G3DSA:3.10.100.GENE3D); PTHR22803 (PANTHER); IPR001304 (PROSITE_PROFILES); IPR016187 (SUPERFAMILY)                                                                                                                                                                                                                                                                                                                                                                                                                                                                                                                                                                                        |
| 1229 | c31738_g3_i1_len_2581_path_5275_0_210_5_486_211_222_344_223_246_368_247_2580_1              | 178  | macrophage mannose receptor 1-like                        | 860  | 9.34E-132 | 49.50% | 0.102 | IPR001304 (SMART); IPR016186 (G3DSA:3.10.100.GENE3D); IPR016186 (G3DSA:3.10.100.GENE3D); IPR016186 (G3DSA:3.10.100.GENE3D); IPR001304 (PFAM); IPR016186 (G3DSA:3.10.100.GENE3D); PTHR22803 (PANTHER); PTHR22803:SF16 (PANTHER); IPR018378 (PROSITE_PATTERNS); IPR018378 (PROSITE_PATTERNS); IPR018378 (PROSITE_PATTERNS); CYTOPLASMIC_DOMAIN (PHOBIUS); NON_CYTOPLASMIC_DOMAIN (PHOBIUS); TRANSMEMBRANE (PHOBIUS); IPR001304 (PROSITE_PROFILES); IPR001304 (PROSITE_PROFILES); IPR001304 (PROSITE_PROFILES); IPR001304 (PROSITE_PROFILES); IPR016187 (SUPERFAMILY); TMhelix (TMHMM) |
| 1230 | c31798_g1_i1_len_4051_path_4029_0_4050_5                                                    | 1773 | low-density lipoprotein receptor-related protein 6        | 1350 | 5.77E-13  | 46.20% | 0.278 | IPR002172 (PRINTS); IPR000859 (SMART); IPR000998 (SMART); IPR002172 (SMART); IPR000998 (PFAM); IPR000859 (G3DSA:2.60.120.GENE3D); IPR000859 (PFAM); IPR002172 (G3DSA:4.10.400.GENE3D); IPR000859 (G3DSA:2.60.120.GENE3D); IPR002172 (G3DSA:4.10.400.GENE3D); PTHR10529:SF208 (PANTHER); PTHR10529 (PANTHER); IPR000998 (PROSITE_PROFILES); IPR000859 (PROSITE_PROFILES); IPR000998 (PROSITE_PROFILES); IPR002172 (PROSITE_PROFILES); IPR000998 (PROSITE_PROFILES); IPR002172 (PROSITE_PROFILES); IPR000998 (PROSITE_PROFILES); IPR002172 (SUPERFAMILY); IPR002172 (SUPERFAMILY); IPR002172 (SUPERFAMILY); IPR013320 (SUPERFAMILY); IPR013320 (SUPERFAMILY); IPR013320 (SUPERFAMILY); IPR013320 (SUPERFAMILY); IPR000859 (SUPERFAMILY)     |
| 1231 | c31858_g1_i1_len_972_path_53_0_971_5                                                        | 60   | leucine-rich repeat-containing protein 15-like isoform x2 | 324  | 9.16E-58  | 60.00% | 0.101 | Coil (COILS); Coil (COILS); IPR003591 (SMART); IPR001611 (PFAM); G3DSA:3.80.10.10 (GENE3D); PTHR24373 (PANTHER); IPR001611 (PROSITE_PROFILES); IPR001611 (PROSITE_PROFILES); IPR001611 (PROSITE_PROFILES); SSF52058 (SUPERFAMILY)                                                                                                                                                                                                                                                                                                                                                                                                                                                                                                         |

|      |                                                                                |     |                                            |     |           |        |       |   |                                                                                                                                                                                                                                                                                                                                                                                                                                                                                                                                                                          |
|------|--------------------------------------------------------------------------------|-----|--------------------------------------------|-----|-----------|--------|-------|---|--------------------------------------------------------------------------------------------------------------------------------------------------------------------------------------------------------------------------------------------------------------------------------------------------------------------------------------------------------------------------------------------------------------------------------------------------------------------------------------------------------------------------------------------------------------------------|
| 1232 | c31931_g1_i1_len_1546_path_1624_0_1545_5                                       | 119 | er membrane protein complex subunit 10     | 515 | 4.07E-72  | 63.60% | 0.672 | Y | IPR029615 (PTHR21397:PANTHER); PTHR21397 (PANTHER); TRANSMEMBRANE (PHOBIUS); CYTOPLASMIC_DOMAIN (PHOBIUS); TRANSMEMBRANE (PHOBIUS); NON_CYTOPLASMIC_DOMAIN (PHOBIUS); TRANSMEMBRANE (PHOBIUS); TRANSMEMBRANE (PHOBIUS); TRANSMEMBRANE (PHOBIUS); TRANSMEMBRANE (PHOBIUS); CYTOPLASMIC_DOMAIN (PHOBIUS); NON_CYTOPLASMIC_DOMAIN (PHOBIUS); CYTOPLASMIC_DOMAIN (PHOBIUS); CYTOPLASMIC_DOMAIN (PHOBIUS); NON_CYTOPLASMIC_DOMAIN (PHOBIUS); SignalP-noTM (SIGNALP_EUK); TMhelix (TMHMM); TMhelix (TMHMM); TMhelix (TMHMM); TMhelix (TMHMM); TMhelix (TMHMM); TMhelix (TMHMM) |
| 1233 | c31947_g1_i1_len_1492_path_409_0_147_55_6_148_1491_2                           | 472 | prophenoloxidase activating factor         | 497 | 4.12E-133 | 66.00% | 0.116 |   | IPR001314 (PRINTS); IPR001254 (SMART); G3DSA:2.40.10.10 (GENE3D); G3DSA:2.40.10.10 (GENE3D); G3DSA:2.40.10.10 (GENE3D); IPR001254 (PFAM); PTHR24268 (PANTHER); PTHR24268:SF95 (PANTHER); IPR018114 (PROSITE_PATTERNS); TRANSMEMBRANE (PHOBIUS); CYTOPLASMIC_DOMAIN (PHOBIUS); NON_CYTOPLASMIC_DOMAIN (PHOBIUS); IPR001254 (PROSITE_PROFILES); IPR009003 (SUPERFAMILY); TMhelix (TMHMM)                                                                                                                                                                                   |
| 1234 | c3195_g1_i1_len_146_path_255_0_145_2                                           | 1   | thioredoxin-like protein                   | 48  | 1.82E-21  | 96.70% | 0.104 |   | IPR013766 (PFAM); IPR012336 (G3DSA:3.40.30.GENE3D); IPR005746 (PANTHER); IPR012336 (SUPERFAMILY)                                                                                                                                                                                                                                                                                                                                                                                                                                                                         |
| 1235 | c31967_g2_i1_len_1211_path_1943_0_1210_4                                       | 119 | hyaluronidase precursor                    | 404 | 1.41E-79  | 60.10% | 0.216 |   | IPR018155 (PRINTS); IPR001329 (PRINTS); IPR013785 (G3DSA:3.20.20.GENE3D); IPR018155 (PFAM); IPR018155 (PANTHER); PTHR11769:SF8 (PANTHER); TRANSMEMBRANE (PHOBIUS); NON_CYTOPLASMIC_DOMAIN (PHOBIUS); CYTOPLASMIC_DOMAIN (PHOBIUS); IPR017853 (SUPERFAMILY); TMhelix (TMHMM)                                                                                                                                                                                                                                                                                              |
| 1236 | c32030_g4_i1_len_1867_path_4222_0_230_7_19_231_254_743_255_644_1132_645_1866_5 | 421 | 26s protease regulatory subunit 10b        | 622 | 0         | 96.70% | 0.097 |   | Coil (COILS); IPR003593 (SMART); IPR005937 (TIGRFAM); G3DSA:1.10.8.60 (GENE3D); IPR003959 (PFAM); IPR027417 (G3DSA:3.40.50.GENE3D); PTHR23073:SF24 (PANTHER); PTHR23073 (PANTHER); IPR003960 (PROSITE_PATTERNS); NON_CYTOPLASMIC_DOMAIN (PHOBIUS); CYTOPLASMIC_DOMAIN (PHOBIUS); TRANSMEMBRANE (PHOBIUS); TRANSMEMBRANE (PHOBIUS); IPR027417 (SUPERFAMILY)                                                                                                                                                                                                               |
| 1237 | c32040_g1_i1_len_1612_path_1806_0_567_7_1_568_1611_4                           | 160 | serine protease                            | 537 | 1.03E-57  | 75.40% | 0.198 |   | IPR008758 (PFAM); IPR008758 (PANTHER)                                                                                                                                                                                                                                                                                                                                                                                                                                                                                                                                    |
| 1238 | c32040_g1_i1_len_1612_path_1806_0_567_7_1_568_1611_5                           | 160 | serine protease                            | 537 | 9.53E-125 | 71.10% | 0.171 |   | IPR008758 (PFAM); IPR029058 (G3DSA:3.40.50.GENE3D); IPR008758 (PANTHER); PTHR11010:SF9 (PANTHER); TRANSMEMBRANE (PHOBIUS); NON_CYTOPLASMIC_DOMAIN (PHOBIUS); CYTOPLASMIC_DOMAIN (PHOBIUS); NON_CYTOPLASMIC_DOMAIN (PHOBIUS); TRANSMEMBRANE (PHOBIUS); IPR029058 (SUPERFAMILY); TMhelix (TMHMM)                                                                                                                                                                                                                                                                           |
| 1239 | c32040_g1_i2_len_1700_path_1806_0_567_2_371_568_655_71_656_1699_5              | 220 | serine protease                            | 566 | 0         | 72.20% | 0.171 |   | IPR029058 (G3DSA:3.40.50.GENE3D); IPR008758 (PFAM); IPR008758 (PANTHER); PTHR11010:SF9 (PANTHER); CYTOPLASMIC_DOMAIN (PHOBIUS); NON_CYTOPLASMIC_DOMAIN (PHOBIUS); TRANSMEMBRANE (PHOBIUS); IPR029058 (SUPERFAMILY); TMhelix (TMHMM)                                                                                                                                                                                                                                                                                                                                      |
| 1240 | c32110_g1_i1_len_810_path_888_0_809_0                                          | 712 | peptidase                                  | 270 | 8.36E-10  | 48.20% | 0.132 |   | IPR025711 (PFAM); CYTOPLASMIC_DOMAIN (PHOBIUS); NON_CYTOPLASMIC_DOMAIN (PHOBIUS); TRANSMEMBRANE (PHOBIUS); TMhelix (TMHMM)                                                                                                                                                                                                                                                                                                                                                                                                                                               |
| 1241 | c32126_g1_i1_len_1186_path_1164_0_717_1_882_718_924_2449_925_1185_4            | 71  | trypsinogen 1                              | 395 | 1.24E-77  | 63.00% | 0.176 |   | IPR001314 (PRINTS); IPR001254 (SMART); G3DSA:2.40.10.10 (GENE3D); IPR001254 (PFAM); G3DSA:2.40.10.10 (GENE3D); PTHR24265 (PANTHER); IPR018114 (PROSITE_PATTERNS); IPR018114 (PROSITE_PATTERNS); TRANSMEMBRANE (PHOBIUS); NON_CYTOPLASMIC_DOMAIN (PHOBIUS); TRANSMEMBRANE (PHOBIUS); NON_CYTOPLASMIC_DOMAIN (PHOBIUS); CYTOPLASMIC_DOMAIN (PHOBIUS); IPR001254 (PROSITE_PROFILES); IPR009003 (SUPERFAMILY); TMhelix (TMHMM)                                                                                                                                               |
| 1242 | c32126_g1_i2_len_255_path_2327_0_47_188_2_48_254_4                             | 3   | female reproductive tract protease partial | 85  | 3.80E-14  | 66.30% | 0.115 |   | G3DSA:2.40.10.10 (GENE3D); G3DSA:2.40.10.10 (GENE3D); IPR001254 (PFAM); PTHR24265 (PANTHER); IPR018114 (PROSITE_PATTERNS); IPR001254 (PROSITE_PROFILES); IPR009003 (SUPERFAMILY)                                                                                                                                                                                                                                                                                                                                                                                         |

|      |                                                                                               |     |                                                  |      |           |        |       |                                                                                                                                                                                                                                                                                                                                                                                                                                                                                                                                                                                                                                                                                                                                                                                                                                                                                               |
|------|-----------------------------------------------------------------------------------------------|-----|--------------------------------------------------|------|-----------|--------|-------|-----------------------------------------------------------------------------------------------------------------------------------------------------------------------------------------------------------------------------------------------------------------------------------------------------------------------------------------------------------------------------------------------------------------------------------------------------------------------------------------------------------------------------------------------------------------------------------------------------------------------------------------------------------------------------------------------------------------------------------------------------------------------------------------------------------------------------------------------------------------------------------------------|
| 1243 | c32133_g1_i1_len_4456_path_93_0_3009_92_3010_4455_3                                           | 409 | receptor-type tyrosine-protein phosphatase f     | 1486 | 0         | 85.00% | 0.103 | IPR000242 (PRINTS); IPR003961 (SMART); IPR000242 (SMART); IPR003595 (SMART); IPR000242 (PFAM); IPR029021 (G3DSA:3.90.190.GENE3D); IPR003961 (PFAM); IPR013783 (G3DSA:2.60.40.GENE3D); IPR013783 (G3DSA:2.60.40.GENE3D); IPR013783 (G3DSA:2.60.40.GENE3D); IPR013783 (G3DSA:2.60.40.GENE3D); PTHR19134 (PANTHER); PTHR19134:SF199 (PANTHER); IPR016130 (PROSITE_PATTERNS); IPR016130 (PROSITE_PATTERNS); CYTOPLASMIC_DOMAIN (PHOBIUS); NON_CYTOPLASMIC_DOMAIN (PHOBIUS); TRANSMEMBRANE (PHOBIUS); IPR000242 (PROSITE_PROFILES); IPR003961 (PROSITE_PROFILES); IPR000242 (PROSITE_PROFILES); IPR003961 (PROSITE_PROFILES); IPR003961 (PROSITE_PROFILES); IPR000387 (PROSITE_PROFILES); IPR003961 (PROSITE_PROFILES); IPR000387 (PROSITE_PROFILES); IPR003961 (SUPERFAMILY); IPR029021 (SUPERFAMILY); IPR003961 (SUPERFAMILY); IPR003961 (SUPERFAMILY); IPR029021 (SUPERFAMILY); TMhelix (TMHMM) |
| 1244 | c32152_g1_i1_len_407_path_287_0_404_92_405_406_1                                              | 7   | hypothetical protein DAPPUDRAFT_246507           | 136  | 4.03E-16  | 59.60% | 0.098 | IPR025714 (PFAM); PTHR32026 (PANTHER)                                                                                                                                                                                                                                                                                                                                                                                                                                                                                                                                                                                                                                                                                                                                                                                                                                                         |
| 1245 | c32184_g1_i1_len_1158_path_53_0_941_993_942_943_995_944_1157_2                                | 48  | isoform j                                        | 386  | 8.06E-128 | 69.00% | 0.109 | IPR000742 (SMART); IPR013032 (PFAM); G3DSA:2.10.25.10 (GENE3D); IPR013032 (PROSITE_PATTERNS); IPR013032 (PROSITE_PATTERNS); IPR013032 (PROSITE_PATTERNS); IPR013032 (PROSITE_PATTERNS); IPR000742 (PROSITE_PROFILES); IPR000742 (PROSITE_PROFILES); IPR000742 (PROSITE_PROFILES); SSF90148 (SUPERFAMILY)                                                                                                                                                                                                                                                                                                                                                                                                                                                                                                                                                                                      |
| 1246 | c32295_g1_i2_len_249_path_1955_0_68_202_4_69_248_0                                            | 2   | suppressor of tumorigenicity 14 isoform x1       | 83   | 9.84E-07  | 63.50% | 0.113 | IPR002172 (SMART); IPR002172 (PFAM); IPR002172 (G3DSA:4.10.400.GENE3D); IPR002172 (PROSITE_PROFILES); IPR002172 (SUPERFAMILY)                                                                                                                                                                                                                                                                                                                                                                                                                                                                                                                                                                                                                                                                                                                                                                 |
| 1247 | c32315_g1_i1_len_1014_path_105_0_906_10_4_907_1013_0                                          | 106 | lipophorin receptor                              | 338  | 4.62E-50  | 64.10% | 0.132 | IPR000033 (SMART); PF14670 (PFAM); G3DSA:2.10.25.10 (GENE3D); IPR011042 (G3DSA:2.120.10.GENE3D); IPR000033 (PFAM); PTHR10529 (PANTHER); IPR000033 (PROSITE_PROFILES); IPR000033 (PROSITE_PROFILES); IPR000033 (PROSITE_PROFILES); SSF57196 (SUPERFAMILY); SSF63825 (SUPERFAMILY)                                                                                                                                                                                                                                                                                                                                                                                                                                                                                                                                                                                                              |
| 1248 | c32324_g1_i1_len_1171_path_2639_0_704_3_368_705_732_27_733_807_2183_808_1063_2439_1064_1170_0 | 64  | inhibitor of apoptosis                           | 391  | 1.91E-53  | 51.50% | 0.113 | IPR001370 (SMART); IPR001841 (SMART); PF13920 (PFAM); G3DSA:1.10.8.10 (GENE3D); IPR001370 (G3DSA:1.10.1170.GENE3D); IPR001370 (PFAM); PTHR10044:SF86 (PANTHER); PTHR10044 (PANTHER); IPR001370 (PROSITE_PROFILES); IPR015940 (PROSITE_PROFILES); IPR001841 (PROSITE_PROFILES); SSF57924 (SUPERFAMILY); IPR009060 (SUPERFAMILY)                                                                                                                                                                                                                                                                                                                                                                                                                                                                                                                                                                |
| 1249 | c32324_g1_i2_len_1628_path_2639_0_704_3_368_705_732_27_733_807_102_808_1627_0                 | 75  | inhibitor of apoptosis                           | 543  | 9.18E-52  | 51.50% | 0.113 | IPR001370 (SMART); IPR001841 (SMART); PF13920 (PFAM); IPR001370 (G3DSA:1.10.1170.GENE3D); G3DSA:1.10.8.10 (GENE3D); IPR013083 (G3DSA:3.30.40.GENE3D); IPR001370 (PFAM); PTHR10044:SF86 (PANTHER); PTHR10044 (PANTHER); IPR001841 (PROSITE_PROFILES); IPR001370 (PROSITE_PROFILES); IPR015940 (PROSITE_PROFILES); IPR009060 (SUPERFAMILY); SSF57924 (SUPERFAMILY)                                                                                                                                                                                                                                                                                                                                                                                                                                                                                                                              |
| 1250 | c32331_g1_i1_len_1417_path_129_0_1416_4                                                       | 448 | otogelin                                         | 472  | 7.37E-11  | 41.30% | 0.106 | no IPS match                                                                                                                                                                                                                                                                                                                                                                                                                                                                                                                                                                                                                                                                                                                                                                                                                                                                                  |
| 1251 | c32349_g1_i1_len_417_path_961_0_416_5                                                         | 13  | c-type lectin domain family member a             | 139  | 2.05E-24  | 57.50% | 0.147 | PR01504 (PRINTS); IPR001304 (SMART); IPR016186 (G3DSA:3.10.100.GENE3D); IPR001304 (PFAM); PTHR22802 (PANTHER); IPR018378 (PROSITE_PATTERNS); IPR001304 (PROSITE_PROFILES); IPR016187 (SUPERFAMILY)                                                                                                                                                                                                                                                                                                                                                                                                                                                                                                                                                                                                                                                                                            |
| 1252 | c32380_g1_i1_len_1318_path_1482_0_846_1_9_847_1317_2                                          | 103 | flavin-containing monooxygenase fmo gs-ox-like 4 | 439  | 1.85E-129 | 63.40% | 0.098 | IPR000960 (PRINTS); G3DSA:3.50.50.60 (GENE3D); G3DSA:3.50.50.60 (GENE3D); IPR020946 (PFAM); PTHR23023 (PANTHER); PTHR23023:SF4 (PANTHER); CYTOPLASMIC_DOMAIN (PHOBIUS); TRANSMEMBRANE (PHOBIUS); NON_CYTOPLASMIC_DOMAIN (PHOBIUS); SSF51905 (SUPERFAMILY); SSF51905 (SUPERFAMILY); TMhelix (TMHMM)                                                                                                                                                                                                                                                                                                                                                                                                                                                                                                                                                                                            |
| 1253 | c32477_g1_i1_len_4022_path_53_0_4021_1                                                        | 290 | cd109 antigen                                    | 1341 | 0         | 60.10% | 0.103 | IPR002172 (SMART); IPR009048 (G3DSA:2.60.40.GENE3D); IPR001599 (PFAM); IPR011626 (PFAM); IPR011625 (PFAM); IPR008930 (G3DSA:1.50.10.GENE3D); IPR009048 (PFAM); IPR002172 (G3DSA:4.10.400.GENE3D); PTHR11412 (PANTHER); PTHR11412:SF85 (PANTHER); CYTOPLASMIC_DOMAIN (PHOBIUS); TRANSMEMBRANE (PHOBIUS); NON_CYTOPLASMIC_DOMAIN (PHOBIUS); IPR002172 (PROSITE_PROFILES); IPR008930 (SUPERFAMILY); IPR002172 (SUPERFAMILY); IPR009048 (SUPERFAMILY); TMhelix (TMHMM)                                                                                                                                                                                                                                                                                                                                                                                                                            |

|      |                                                                             |     |                                                                                    |     |          |        |         |                                                                                                                                                                                                                                                                                                                                                                                                                                                   |
|------|-----------------------------------------------------------------------------|-----|------------------------------------------------------------------------------------|-----|----------|--------|---------|---------------------------------------------------------------------------------------------------------------------------------------------------------------------------------------------------------------------------------------------------------------------------------------------------------------------------------------------------------------------------------------------------------------------------------------------------|
| 1254 | c32493_g1_i1_len_540_path_755_0_274_662_275_298_1051_299_416_1168_417_539_2 | 39  | sortilin-related receptor                                                          | 180 | 1.29E-10 | 41.10% | 0.1     | IPR002172 (PRINTS); IPR002172 (SMART); IPR002172 (G3DSA:4.10.400.GENE3D); IPR002172 (PFAM); PTHR10529 (PANTHER); IPR023415 (PROSITE_PATTERNS); IPR023415 (PROSITE_PATTERNS); IPR002172 (PROSITE_PROFILES); IPR002172 (PROSITE_PROFILES); IPR002172 (SUPERFAMILY); IPR002172 (SUPERFAMILY)                                                                                                                                                         |
| 1255 | c32494_g1_i1_len_1820_path_1882_0_1605_3485_1606_1606_18_1607_1819_1        | 219 | serine threonine-protein phosphatase 6 catalytic subunit                           | 607 | 0        | 93.80% | 0.102   | IPR006186 (PRINTS); IPR006186 (SMART); IPR029052 (G3DSA:3.60.21.GENE3D); IPR004843 (PFAM); PTHR11668 (PANTHER); PTHR11668:SF24 (PANTHER); IPR006186 (PROSITE_PATTERNS); IPR029052 (SUPERFAMILY)                                                                                                                                                                                                                                                   |
| 1256 | c32501_g1_i1_len_408_path_1_0_407_0                                         | 24  | low quality protein: mam and ldl-receptor class a domain-containing protein 1-like | 136 | 8.66E-23 | 55.80% | 0.177   | IPR000998 (PFAM); PTHR23282:SF75 (PANTHER); PTHR23282 (PANTHER); IPR000998 (PROSITE_PROFILES); IPR013320 (SUPERFAMILY)                                                                                                                                                                                                                                                                                                                            |
| 1257 | c32501_g2_i1_len_1300_path_823_0_1299_1                                     | 47  | apical endosomal glycoprotein                                                      | 433 | 1.95E-31 | 46.50% | 0.103   | IPR000998 (SMART); IPR000998 (PFAM); PTHR23282 (PANTHER); CYTOPLASMIC_DOMAIN (PHOBIUS); TRANSMEMBRANE (PHOBIUS); NON_CYTOPLASMIC_DOMAIN (PHOBIUS); IPR000998 (PROSITE_PROFILES); IPR000998 (PROSITE_PROFILES); IPR013320 (SUPERFAMILY); IPR013320 (SUPERFAMILY); TMhelix (TMHMM)                                                                                                                                                                  |
| 1258 | c32539_g3_i1_len_434_path_311_0_433_2                                       | 6   | zinc finger protein ozf-like                                                       | 144 | 3.03E-27 | 58.30% | 0.108   | IPR015880 (SMART); IPR013087 (G3DSA:3.30.160.GENE3D); IPR013087 (G3DSA:3.30.160.GENE3D); PF13894 (PFAM); IPR013087 (G3DSA:3.30.160.GENE3D); PF13465 (PFAM); PTHR24409 (PANTHER); IPR007087 (PROSITE_PATTERNS); IPR007087 (PROSITE_PATTERNS); IPR007087 (PROSITE_PATTERNS); IPR007087 (PROSITE_PATTERNS); IPR007087 (PROSITE_PROFILES); IPR007087 (PROSITE_PROFILES); IPR007087 (PROSITE_PROFILES); SSF57667 (SUPERFAMILY); SSF57667 (SUPERFAMILY) |
| 1259 | c32545_g1_i1_len_1438_path_53_0_202_256_203_1437_2                          | 113 | torsin-1b-like isoform x2                                                          | 479 | 4.42E-25 | 53.00% | 0.269   | IPR027417 (G3DSA:3.40.50.GENE3D); IPR010448 (PFAM); IPR010448 (PANTHER); IPR030553 (PTHR10760:PANTHER); CYTOPLASMIC_DOMAIN (PHOBIUS); NON_CYTOPLASMIC_DOMAIN (PHOBIUS); TRANSMEMBRANE (PHOBIUS); TRANSMEMBRANE (PHOBIUS); NON_CYTOPLASMIC_DOMAIN (PHOBIUS); IPR027417 (SUPERFAMILY); TMhelix (TMHMM); TMhelix (TMHMM)                                                                                                                             |
| 1260 | c32545_g1_i2_len_1366_path_3010_0_130_2_56_131_1365_2                       | 115 | torsin-1b-like isoform x1                                                          | 455 | 2.81E-25 | 52.60% | 0.107   | IPR010448 (PFAM); IPR027417 (G3DSA:3.40.50.GENE3D); IPR010448 (PANTHER); IPR030553 (PTHR10760:PANTHER); TRANSMEMBRANE (PHOBIUS); CYTOPLASMIC_DOMAIN (PHOBIUS); NON_CYTOPLASMIC_DOMAIN (PHOBIUS); IPR027417 (SUPERFAMILY); TMhelix (TMHMM)                                                                                                                                                                                                         |
| 1261 | c32640_g1_i1_len_1260_path_97_0_1138_96_1139_1259_0                         | 140 | matrix metalloproteinase-9-like                                                    | 420 | 1.50E-09 | 48.90% | 0.131   | IPR000562 (SMART); IPR000562 (PFAM); IPR000562 (G3DSA:2.10.10.GENE3D); IPR000562 (PROSITE_PROFILES); IPR000562 (PROSITE_PROFILES); IPR013806 (SUPERFAMILY); IPR013806 (SUPERFAMILY)                                                                                                                                                                                                                                                               |
| 1262 | c32677_g1_i1_len_2050_path_1_0_647_4108_648_680_649_681_2049_5              | 271 | serine threonine-protein phosphatase 2b catalytic subunit 2-like isoform x1        | 683 | 0        | 93.50% | 0.405Y  | IPR006186 (PRINTS); IPR006186 (SMART); IPR004843 (PFAM); IPR029052 (G3DSA:3.60.21.GENE3D); PTHR11668:SF186 (PANTHER); PTHR11668 (PANTHER); IPR006186 (PROSITE_PATTERNS); IPR029052 (SUPERFAMILY)                                                                                                                                                                                                                                                  |
| 1263 | c32677_g1_i2_len_2017_path_1_0_647_649_648_2016_5                           | 283 | serine threonine-protein phosphatase 2b catalytic subunit 2-like isoform x2        | 672 | 0        | 94.90% | 0.405 Y | IPR006186 (PRINTS); IPR006186 (SMART); IPR004843 (PFAM); IPR029052 (G3DSA:3.60.21.GENE3D); PTHR11668:SF186 (PANTHER); PTHR11668 (PANTHER); IPR006186 (PROSITE_PATTERNS); IPR029052 (SUPERFAMILY)                                                                                                                                                                                                                                                  |
| 1264 | c32716_g1_i1_len_1207_path_199_0_98_23_99_100_122_101_1206_1                | 43  | probable histone-binding protein caf1 isoform x2                                   | 402 | 0        | 98.80% | 0.249   | IPR020472 (PRINTS); IPR001680 (SMART); IPR001680 (PFAM); IPR015943 (G3DSA:2.130.10.GENE3D); IPR022052 (PFAM); PTHR22850 (PANTHER); PTHR22850:SF82 (PANTHER); IPR019775 (PROSITE_PATTERNS); IPR019775 (PROSITE_PATTERNS); IPR001680 (PROSITE_PROFILES); IPR001680 (PROSITE_PROFILES); IPR017986 (PROSITE_PROFILES); IPR001680 (PROSITE_PROFILES); IPR017986 (SUPERFAMILY)                                                                          |
| 1265 | c32716_g1_i2_len_1182_path_47_0_55_102_56_75_122_76_1181_0                  | 30  | probable histone-binding protein caf1                                              | 394 | 0        | 99.00% | 0.15    | IPR020472 (PRINTS); IPR001680 (SMART); IPR022052 (PFAM); IPR015943 (G3DSA:2.130.10.GENE3D); IPR001680 (PFAM); PTHR22850:SF82 (PANTHER); PTHR22850 (PANTHER); IPR019775 (PROSITE_PATTERNS); IPR019775 (PROSITE_PATTERNS); IPR001680 (PROSITE_PROFILES); IPR017986 (PROSITE_PROFILES); IPR001680 (PROSITE_PROFILES); IPR001680 (PROSITE_PROFILES); IPR017986 (SUPERFAMILY)                                                                          |



|      |                                                            |     |                                                       |     |           |        |       |                                                                                                                                                                                                                                                                                                                                                                                                                                                                                                                                                                                                                                                                                              |
|------|------------------------------------------------------------|-----|-------------------------------------------------------|-----|-----------|--------|-------|----------------------------------------------------------------------------------------------------------------------------------------------------------------------------------------------------------------------------------------------------------------------------------------------------------------------------------------------------------------------------------------------------------------------------------------------------------------------------------------------------------------------------------------------------------------------------------------------------------------------------------------------------------------------------------------------|
| 1266 | c32716_g1_i3_len_1164_path_47_0_55_23_5_6_57_122_58_1163_0 | 32  | probable histone-binding protein caf1 isoform x2      | 388 | 0         | 99.00% | 0.123 | IPR020472 (PRINTS); IPR001680 (SMART); IPR022052 (PFAM); IPR015943 (G3DSA:2.130.10.GENE3D); IPR001680 (PFAM); PTHR22850:SF82 (PANTHER); PTHR22850 (PANTHER); IPR019775 (PROSITE_PATTERNS); IPR019775 (PROSITE_PATTERNS); IPR001680 (PROSITE_PROFILES); IPR001680 (PROSITE_PROFILES); IPR001680 (PROSITE_PROFILES); IPR017986 (PROSITE_PROFILES); IPR001680 (PROSITE_PROFILES); IPR017986 (SUPERFAMILY)                                                                                                                                                                                                                                                                                       |
| 1267 | c32786_g2_i1_len_1745_path_1943_0_1544_3707_1545_1744_4    | 209 | cytochrome p450 2u1-like                              | 582 | 8.27E-126 | 57.40% | 0.105 | IPR002401 (PRINTS); IPR001128 (PRINTS); IPR001128 (PFAM); IPR001128 (G3DSA:1.10.630.GENE3D); PTHR24300 (PANTHER); IPR017972 (PROSITE_PATTERNS); TRANSMEMBRANE (PHOBIUS); NON_CYTOPLASMIC_DOMAIN (PHOBIUS); CYTOPLASMIC_DOMAIN (PHOBIUS); TRANSMEMBRANE (PHOBIUS); CYTOPLASMIC_DOMAIN (PHOBIUS); TRANSMEMBRANE (PHOBIUS); NON_CYTOPLASMIC_DOMAIN (PHOBIUS); IPR001128 (SUPERFAMILY); TMhelix (TMHMM); TMhelix (TMHMM)                                                                                                                                                                                                                                                                         |
| 1268 | c32828_g1_i1_len_1789_path_1867_0_1788_3                   | 379 | guanine nucleotide-binding protein g g subunit beta-1 | 597 | 0         | 97.80% | 0.14  | Coil (COILS); IPR001632 (PRINTS); IPR020472 (PRINTS); IPR001680 (SMART); IPR015943 (G3DSA:2.130.10.GENE3D); IPR001680 (PFAM); IPR016346 (PANTHER); IPR019775 (PROSITE_PATTERNS); IPR019775 (PROSITE_PATTERNS); IPR019775 (PROSITE_PATTERNS); TRANSMEMBRANE (PHOBIUS); NON_CYTOPLASMIC_DOMAIN (PHOBIUS); NON_CYTOPLASMIC_DOMAIN (PHOBIUS); CYTOPLASMIC_DOMAIN (PHOBIUS); TRANSMEMBRANE (PHOBIUS); CYTOPLASMIC_DOMAIN (PHOBIUS); IPR001680 (PROSITE_PROFILES); IPR001680 (PROSITE_PROFILES); IPR001680 (PROSITE_PROFILES); IPR001680 (PROSITE_PROFILES); IPR017986 (PROSITE_PROFILES); IPR001680 (PROSITE_PROFILES); IPR017986 (SUPERFAMILY); TMhelix (TMHMM); TMhelix (TMHMM)                 |
| 1269 | c32835_g1_i1_len_521_path_241_0_224_466_225_520_2          | 12  | serine protease                                       | 173 | 1.44E-08  | 64.00% | 0.115 | G3DSA:2.40.10.10 (GENE3D); IPR001254 (PFAM); PTHR24268 (PANTHER); IPR009003 (SUPERFAMILY)                                                                                                                                                                                                                                                                                                                                                                                                                                                                                                                                                                                                    |
| 1270 | c32835_g1_i2_len_444_path_1113_0_147_46_6_148_443_0        | 26  | serine protease                                       | 148 | 6.80E-09  | 64.60% | 0.129 | IPR001254 (PFAM); G3DSA:2.40.10.10 (GENE3D); PTHR24268 (PANTHER); IPR009003 (SUPERFAMILY)                                                                                                                                                                                                                                                                                                                                                                                                                                                                                                                                                                                                    |
| 1271 | c32911_g1_i1_len_152_path_3612_0_151_2                     | 1   | attractin-like protein 1                              | 50  | 9.33E-11  | 73.20% | 0.103 | no IPS match                                                                                                                                                                                                                                                                                                                                                                                                                                                                                                                                                                                                                                                                                 |
| 1272 | c32911_g2_i1_len_845_path_1_0_786_3764_787_844_3           | 31  | attractin-like protein 1 isoform x2                   | 282 | 1.10E-125 | 81.80% | 0.262 | IPR002049 (SMART); G3DSA:2.10.25.10 (GENE3D); IPR002049 (PFAM); G3DSA:2.10.25.10 (GENE3D); PTHR10574:SF3 (PANTHER); PTHR10574 (PANTHER); TRANSMEMBRANE (PHOBIUS); NON_CYTOPLASMIC_DOMAIN (PHOBIUS); CYTOPLASMIC_DOMAIN (PHOBIUS); SSF57196 (SUPERFAMILY); TMhelix (TMHMM)                                                                                                                                                                                                                                                                                                                                                                                                                    |
| 1273 | c32911_g2_i2_len_1764_path_1_0_786_788_787_1763_4          | 83  | attractin-like protein 1 isoform x2                   | 588 | 0         | 69.10% | 0.122 | IPR016201 (SMART); IPR002049 (SMART); IPR015915 (G3DSA:2.120.10.GENE3D); G3DSA:2.10.25.10 (GENE3D); IPR002049 (PFAM); IPR002165 (PFAM); PF13854 (PFAM); G3DSA:2.10.25.10 (GENE3D); PTHR10574 (PANTHER); PTHR10574:SF3 (PANTHER); CYTOPLASMIC_DOMAIN (PHOBIUS); NON_CYTOPLASMIC_DOMAIN (PHOBIUS); TRANSMEMBRANE (PHOBIUS); SSF117281 (SUPERFAMILY); SSF57196 (SUPERFAMILY); TMhelix (TMHMM)                                                                                                                                                                                                                                                                                                   |
| 1274 | c32960_g1_i1_len_882_path_1_0_881_1                        | 58  | zinc finger protein ozf-like                          | 294 | 3.42E-62  | 61.20% | 0.099 | IPR015880 (SMART); IPR013087 (G3DSA:3.30.160.GENE3D); IPR013087 (G3DSA:3.30.160.GENE3D); PF13465 (PFAM); IPR007087 (PFAM); IPR013087 (G3DSA:3.30.160.GENE3D); IPR013087 (G3DSA:3.30.160.GENE3D); PTHR24409 (PANTHER); IPR007087 (PROSITE_PATTERNS); IPR007087 (PROSITE_PATTERNS); IPR007087 (PROSITE_PATTERNS); IPR007087 (PROSITE_PATTERNS); IPR007087 (PROSITE_PATTERNS); IPR007087 (PROSITE_PATTERNS); IPR007087 (PROSITE_PROFILES); IPR007087 (PROSITE_PROFILES); IPR007087 (PROSITE_PROFILES); IPR007087 (PROSITE_PROFILES); IPR007087 (PROSITE_PROFILES); IPR007087 (PROSITE_PROFILES); SSF57667 (SUPERFAMILY); SSF57667 (SUPERFAMILY); SSF57667 (SUPERFAMILY); SSF57667 (SUPERFAMILY) |
| 1275 | c32999_g1_i1_len_830_path_917_0_748_25_749_829_5           | 68  | virulence metalloprotease                             | 266 | 5.71E-19  | 54.40% | 0.173 | IPR011096 (PFAM); IPR025711 (PFAM); CYTOPLASMIC_DOMAIN (PHOBIUS); NON_CYTOPLASMIC_DOMAIN (PHOBIUS); TRANSMEMBRANE (PHOBIUS); TMhelix (TMHMM)                                                                                                                                                                                                                                                                                                                                                                                                                                                                                                                                                 |

|      |                                                                                      |       |                                                       |      |           |        |        |                                                                                                                                                                                                                                                                                                                                                                                                                                                                                                                                                                                                                          |
|------|--------------------------------------------------------------------------------------|-------|-------------------------------------------------------|------|-----------|--------|--------|--------------------------------------------------------------------------------------------------------------------------------------------------------------------------------------------------------------------------------------------------------------------------------------------------------------------------------------------------------------------------------------------------------------------------------------------------------------------------------------------------------------------------------------------------------------------------------------------------------------------------|
| 1276 | c32999_g1_i2_len_881_path_917_0_748_166_6_749_799_25_800_880_5                       | 73    | virulence metalloprotease                             | 283  | 1.79E-18  | 54.40% | 0.136  | IPR025711 (PFAM); IPR011096 (PFAM); CYTOPLASMIC_DOMAIN (PHOBIUS); NON_CYTOPLASMIC_DOMAIN (PHOBIUS); NON_CYTOPLASMIC_DOMAIN (PHOBIUS); TRANSMEMBRANE (PHOBIUS); TRANSMEMBRANE (PHOBIUS); TMhelix (TMHMM)                                                                                                                                                                                                                                                                                                                                                                                                                  |
| 1277 | c32999_g1_i3_len_890_path_917_0_748_166_6_749_799_1716_800_889_5                     | 73    | virulence metalloprotease                             | 286  | 2.48E-18  | 54.40% | 0.138  | IPR025711 (PFAM); IPR011096 (PFAM); TRANSMEMBRANE (PHOBIUS); NON_CYTOPLASMIC_DOMAIN (PHOBIUS); NON_CYTOPLASMIC_DOMAIN (PHOBIUS); TRANSMEMBRANE (PHOBIUS); CYTOPLASMIC_DOMAIN (PHOBIUS); TMhelix (TMHMM)                                                                                                                                                                                                                                                                                                                                                                                                                  |
| 1278 | c33008_g1_i1_len_1460_path_1488_0_1459_3                                             | 115   | vitellogenin fused with superoxide dismutase          | 487  | 7.13E-32  | 48.90% | 0.273  | IPR001846 (SMART); IPR001846 (PFAM); PTHR23345 (PANTHER); PTHR23345:SF1 (PANTHER); IPR001846 (PROSITE_PROFILES)                                                                                                                                                                                                                                                                                                                                                                                                                                                                                                          |
| 1279 | c33012_g1_i2_len_562_path_1025_0_36_106_1_37_561_5                                   | 24    | dehydrogenase reductase sdr family member 11-like     | 187  | 4.41E-59  | 73.30% | 0.191  | IPR002347 (PRINTS); IPR016040 (G3DSA:3.40.50.GENE3D); IPR002198 (PFAM); PTHR24322 (PANTHER); PTHR24322:SF310 (PANTHER); SSF51735 (SUPERFAMILY)                                                                                                                                                                                                                                                                                                                                                                                                                                                                           |
| 1280 | c33017_g1_i1_len_1951_path_103_0_1204_2_051_1205_1950_3                              | 101   | insulin-like receptor                                 | 651  | 4.31E-139 | 82.00% | 0.102  | IPR001245 (PRINTS); IPR020635 (SMART); IPR001245 (PFAM); G3DSA:3.30.200.20 (GENE3D); G3DSA:1.10.510.10 (GENE3D); PTHR24416 (PANTHER); PTHR24416:SF254 (PANTHER); IPR008266 (PROSITE_PATTERNS); IPR002011 (PROSITE_PATTERNS); TRANSMEMBRANE (PHOBIUS); TRANSMEMBRANE (PHOBIUS); CYTOPLASMIC_DOMAIN (PHOBIUS); CYTOPLASMIC_DOMAIN (PHOBIUS); TRANSMEMBRANE (PHOBIUS); NON_CYTOPLASMIC_DOMAIN (PHOBIUS); TRANSMEMBRANE (PHOBIUS); NON_CYTOPLASMIC_DOMAIN (PHOBIUS); CYTOPLASMIC_DOMAIN (PHOBIUS); IPR000719 (PROSITE_PROFILES); IPR011009 (SUPERFAMILY); TMhelix (TMHMM); TMhelix (TMHMM); TMhelix (TMHMM); TMhelix (TMHMM) |
| 1281 | c3302_g1_i1_len_926_path_1_0_185_187_18_6_925_2                                      | 26    | phospholipase a2-like                                 | 308  | 4.46E-54  | 65.30% | 0.114  | IPR001211 (PRINTS); IPR016090 (SMART); IPR016090 (G3DSA:1.20.90.GENE3D); IPR016090 (PFAM); IPR001211 (PANTHER); PTHR11716:SF45 (PANTHER); IPR013090 (PROSITE_PATTERNS); IPR013090 (PROSITE_PATTERNS); IPR016090 (SUPERFAMILY)                                                                                                                                                                                                                                                                                                                                                                                            |
| 1282 | c3302_g1_i2_len_926_path_1993_0_185_187_186_925_2                                    | 22    | phospholipase a2-like                                 | 308  | 4.83E-54  | 65.10% | 0.252  | IPR001211 (PRINTS); IPR016090 (SMART); IPR016090 (PFAM); IPR016090 (G3DSA:1.20.90.GENE3D); PTHR11716:SF45 (PANTHER); IPR001211 (PANTHER); IPR013090 (PROSITE_PATTERNS); IPR013090 (PROSITE_PATTERNS); IPR016090 (SUPERFAMILY)                                                                                                                                                                                                                                                                                                                                                                                            |
| 1283 | c3306_g1_i1_len_1020_path_998_0_1019_3                                               | 11353 | snaclec stejaggregin-a subunit beta-1-like isoform x2 | 340  | 5.55E-17  | 48.40% | 0.295  | IPR001304 (SMART); IPR001304 (PFAM); IPR016186 (G3DSA:3.10.100.GENE3D); PTHR22802 (PANTHER); TRANSMEMBRANE (PHOBIUS); NON_CYTOPLASMIC_DOMAIN (PHOBIUS); CYTOPLASMIC_DOMAIN (PHOBIUS); IPR001304 (PROSITE_PROFILES); IPR016187 (SUPERFAMILY); TMhelix (TMHMM)                                                                                                                                                                                                                                                                                                                                                             |
| 1284 | c33081_g1_i1_len_4058_path_4090_0_4057_5                                             | 18173 | long form-like                                        | 1352 | 0         | 86.30% | 0.134  | Coil (COILS); IPR002928 (PFAM); PTHR13140 (PANTHER); PTHR13140:SF164 (PANTHER); SSF90257 (SUPERFAMILY); SSF90257 (SUPERFAMILY); SSF90257 (SUPERFAMILY)                                                                                                                                                                                                                                                                                                                                     |
| 1285 | c33162_g1_i1_len_442_path_610_0_273_883_274_295_147_296_366_25_367_391_50_39_2_441_3 | 30    | chemosensory protein                                  | 148  | 2.25E-55  | 81.80% | 0.846Y | IPR005055 (PFAM); IPR005055 (G3DSA:1.10.2080.GENE3D); IPR005055 (PANTHER); PTHR11257:SF2 (PANTHER); SIGNAL_PEPTIDE_N_REGION (PHOBIUS); NON_CYTOPLASMIC_DOMAIN (PHOBIUS); SIGNAL_PEPTIDE_H_REGION (PHOBIUS); SIGNAL_PEPTIDE (PHOBIUS); SIGNAL_PEPTIDE_C_REGION (PHOBIUS); SignalP-noTM (SIGNALP_EUK); IPR005055 (SUPERFAMILY)                                                                                                                                                                                                                                                                                             |
| 1286 | c33201_g1_i1_len_1860_path_53_0_1297_13_49_1298_1578_1349_1579_1859_1                | 253   | alpha beta hydrolase domain-containing protein 13     | 620  | 2.56E-140 | 75.10% | 0.099  | IPR029059 (PFAM); IPR029058 (G3DSA:3.40.50.GENE3D); PTHR12277 (PANTHER); NON_CYTOPLASMIC_DOMAIN (PHOBIUS); CYTOPLASMIC_DOMAIN (PHOBIUS); NON_CYTOPLASMIC_DOMAIN (PHOBIUS); NON_CYTOPLASMIC_DOMAIN (PHOBIUS); TRANSMEMBRANE (PHOBIUS); TRANSMEMBRANE (PHOBIUS); CYTOPLASMIC_DOMAIN (PHOBIUS); TRANSMEMBRANE (PHOBIUS); CYTOPLASMIC_DOMAIN (PHOBIUS); TRANSMEMBRANE (PHOBIUS); CYTOPLASMIC_DOMAIN (PHOBIUS); TRANSMEMBRANE (PHOBIUS); TRANSMEMBRANE (PHOBIUS); IPR029058 (SUPERFAMILY); TMhelix (TMHMM)                                                                                                                    |

[illegible]

|      |                                                                                            |       |                                                              |      |           |        |        |                                                                                                                                                                                                                                                                                                                                                                                                                                                                                                                                                              |
|------|--------------------------------------------------------------------------------------------|-------|--------------------------------------------------------------|------|-----------|--------|--------|--------------------------------------------------------------------------------------------------------------------------------------------------------------------------------------------------------------------------------------------------------------------------------------------------------------------------------------------------------------------------------------------------------------------------------------------------------------------------------------------------------------------------------------------------------------|
| 1298 | c33878_g1_i1_len_616_path_678_0_254_932_255_272_43_273_615_1                               | 32    | apolipoprotein d                                             | 205  | 1.36E-08  | 43.00% | 0.356Y | IPR012674 (G3DSA:2.40.128.GENE3D); IPR000566 (PFAM); NON_CYTOPLASMIC_DOMAIN (PHOBIUS); CYTOPLASMIC_DOMAIN (PHOBIUS); TRANSMEMBRANE (PHOBIUS); SignalP-TM (SIGNALP_GRAM_POSITIVE); IPR011038 (SUPERFAMILY); TMhelix (TMHMM)                                                                                                                                                                                                                                                                                                                                   |
| 1299 | c33884_g1_i1_len_1899_path_53_0_325_377_326_452_504_453_476_528_477_560_612_561_1898_0     | 6806  | low affinity immunoglobulin epsilon fc receptor              | 633  | 4.67E-20  | 53.20% | 0.510Y | Coil (COILS); IPR001304 (SMART); IPR016186 (G3DSA:3.10.100.GENE3D); IPR001304 (PFAM); PTHR22802 (PANTHER); IPR018378 (PROSITE_PATTERNS); SIGNAL_PEPTIDE_C_REGION (PHOBIUS); CYTOPLASMIC_DOMAIN (PHOBIUS); TRANSMEMBRANE (PHOBIUS); NON_CYTOPLASMIC_DOMAIN (PHOBIUS); SIGNAL_PEPTIDE (PHOBIUS); SIGNAL_PEPTIDE_H_REGION (PHOBIUS); SIGNAL_PEPTIDE_N_REGION (PHOBIUS); IPR001304 (PROSITE_PROFILES); SignalP-noTM (SIGNALP_EUK); IPR016187 (SUPERFAMILY); TMhelix (TMHMM)                                                                                      |
| 1300 | c33919_g1_i1_len_990_path_108_0_225_274_8_226_227_2600_228_354_734_355_375_75_5_376_989_1  | 158   | dnaj homolog subfamily b member 6-b isoform x1               | 330  | 2.69E-85  | 65.20% | 0.1    | Coil (COILS); IPR001623 (PRINTS); IPR001623 (SMART); IPR001623 (PFAM); IPR001623 (G3DSA:1.10.287.GENE3D); PTHR24077 (PANTHER); PTHR24077:SF225 (PANTHER); IPR018253 (PROSITE_PATTERNS); IPR001623 (PROSITE_PROFILES); IPR001623 (SUPERFAMILY)                                                                                                                                                                                                                                                                                                                |
| 1301 | c33919_g1_i2_len_1153_path_217_0_291_10_8_292_517_734_518_538_755_539_1152_2               | 303   | dnaj homolog subfamily b member 6-like                       | 384  | 3.83E-77  | 67.90% | 0.214  | Coil (COILS); IPR001623 (PRINTS); IPR001623 (SMART); IPR001623 (PFAM); IPR001623 (G3DSA:1.10.287.GENE3D); PTHR24077 (PANTHER); PTHR24077:SF225 (PANTHER); IPR018253 (PROSITE_PATTERNS); IPR001623 (PROSITE_PROFILES); IPR001623 (SUPERFAMILY)                                                                                                                                                                                                                                                                                                                |
| 1302 | c33934_g1_i1_len_2060_path_2108_0_2059_0                                                   | 18169 | chitinase 1 precursor                                        | 687  | 0         | 69.60% | 0.316  | IPR002557 (SMART); IPR011583 (SMART); IPR002557 (PFAM); IPR001223 (PFAM); IPR029070 (G3DSA:3.10.50.GENE3D); IPR002557 (G3DSA:2.170.140.GENE3D); IPR013781 (G3DSA:3.20.20.GENE3D); PTHR11177 (PANTHER); PTHR11177:SF144 (PANTHER); TRANSMEMBRANE (PHOBIUS); NON_CYTOPLASMIC_DOMAIN (PHOBIUS); TRANSMEMBRANE (PHOBIUS); NON_CYTOPLASMIC_DOMAIN (PHOBIUS); CYTOPLASMIC_DOMAIN (PHOBIUS); IPR002557 (PROSITE_PROFILES); IPR029070 (SUPERFAMILY); IPR002557 (SUPERFAMILY); IPR017853 (SUPERFAMILY)                                                                |
| 1303 | c34022_g1_i1_len_1243_path_1_0_1242_4                                                      | 108   | neurogenic locus notch partial                               | 414  | 5.41E-161 | 81.10% | 0.102  | IPR001507 (SMART); IPR001507 (PFAM); PTHR22907 (PANTHER); NON_CYTOPLASMIC_DOMAIN (PHOBIUS); CYTOPLASMIC_DOMAIN (PHOBIUS); TRANSMEMBRANE (PHOBIUS); IPR001507 (PROSITE_PROFILES); TMhelix (TMHMM)                                                                                                                                                                                                                                                                                                                                                             |
| 1304 | c34025_g1_i1_len_1422_path_495_0_496_99_1_497_498_417_499_826_219_827_999_39_2_1000_1421_3 | 269   | probable nuclear transport factor 2 isoform x1               | 474  | 4.80E-60  | 79.10% | 0.225  | IPR002075 (PFAM); G3DSA:3.10.450.50 (GENE3D); PTHR12612 (PANTHER); TRANSMEMBRANE (PHOBIUS); TRANSMEMBRANE (PHOBIUS); NON_CYTOPLASMIC_DOMAIN (PHOBIUS); CYTOPLASMIC_DOMAIN (PHOBIUS); IPR018222 (PROSITE_PROFILES); SSF54427 (SUPERFAMILY); TMhelix (TMHMM); TMhelix (TMHMM)                                                                                                                                                                                                                                                                                  |
| 1305 | c34025_g1_i2_len_1249_path_495_0_496_99_1_497_498_417_499_826_392_827_1248_3               | 457   | probable nuclear transport factor 2 isoform x1               | 417  | 1.47E-61  | 81.80% | 0.225  | G3DSA:3.10.450.50 (GENE3D); IPR002075 (PFAM); PTHR12612 (PANTHER); IPR018222 (PROSITE_PROFILES); SSF54427 (SUPERFAMILY)                                                                                                                                                                                                                                                                                                                                                                                                                                      |
| 1306 | c34049_g1_i2_len_3517_path_245_0_31_276_32_53_144_54_1441_1684_1442_2501_50_2502_3516_0    | 1041  | cytosolic 10-formyltetrahydrofolate dehydrogenase isoform x1 | 1173 | 0         | 83.50% | 0.123  | Coil (COILS); Coil (COILS); IPR016162 (G3DSA:3.40.605.GENE3D); IPR005793 (G3DSA:3.10.25.GENE3D); IPR002376 (PFAM); IPR009081 (PFAM); IPR009081 (G3DSA:1.10.1200.GENE3D); IPR005793 (PFAM); IPR002376 (G3DSA:3.40.50.GENE3D); IPR016163 (G3DSA:3.40.309.GENE3D); IPR015590 (PFAM); PTHR11699 (PANTHER); PTHR11699:SF118 (PANTHER); IPR029510 (PROSITE_PATTERNS); IPR001555 (PROSITE_PATTERNS); IPR016160 (PROSITE_PATTERNS); IPR009081 (PROSITE_PROFILES); IPR011034 (SUPERFAMILY); IPR009081 (SUPERFAMILY); IPR002376 (SUPERFAMILY); IPR016161 (SUPERFAMILY) |
| 1307 | c34059_g2_i1_len_236_path_214_0_187_780_188_194_787_195_235_2                              | 96    | hemagglutinin amebocyte aggregation factor-like              | 78   | 3.55E-09  | 63.00% | 0.677Y | PF14704 (PFAM); IPR026645 (PANTHER); NON_CYTOPLASMIC_DOMAIN (PHOBIUS); SIGNAL_PEPTIDE_C_REGION (PHOBIUS); SIGNAL_PEPTIDE (PHOBIUS); SIGNAL_PEPTIDE_N_REGION (PHOBIUS); SIGNAL_PEPTIDE_H_REGION (PHOBIUS); SignalP-noTM (SIGNALP_EUK)                                                                                                                                                                                                                                                                                                                         |

|      |                                                                                              |        |                                           |      |           |        |        |                                                                                                                                                                                                                                                                                                                                                                                                                                                                                                                                                                                                                                                                                                                                                                                |
|------|----------------------------------------------------------------------------------------------|--------|-------------------------------------------|------|-----------|--------|--------|--------------------------------------------------------------------------------------------------------------------------------------------------------------------------------------------------------------------------------------------------------------------------------------------------------------------------------------------------------------------------------------------------------------------------------------------------------------------------------------------------------------------------------------------------------------------------------------------------------------------------------------------------------------------------------------------------------------------------------------------------------------------------------|
| 1308 | c34073_g1_i1_len_7197_path_1_0_906_908_907_907_909_908_3304_3306_3305_3380_3382_3381_7196_4  | 234020 | myosin heavy chain isoform 3              | 2399 | 0         | 89.30% | 0.18   | Coil (COILS); IPR001609 (PRINTS); IPR000048 (SMART); IPR001609 (SMART); IPR027401 (G3DSA:4.10.270.GENE3D); IPR001609 (PFAM); IPR004009 (PFAM); IPR002928 (PFAM); G3DSA:1.20.5.340 (GENE3D); PTHR13140:SF364 (PANTHER); PTHR13140 (PANTHER); CYTOPLASMIC_DOMAIN (PHOBIUS); NON_CYTOPLASMIC_DOMAIN (PHOBIUS); TRANSMEMBRANE (PHOBIUS); CYTOPLASMIC_DOMAIN (PHOBIUS); TRANSMEMBRANE (PHOBIUS); IPR001609 (PROSITE_PROFILES); IPR000048 (PROSITE_PROFILES); IPR027417 (SUPERFAMILY); SSF90257 (SUPERFAMILY); SSF90257 (SUPERFAMILY); SSF90257 (SUPERFAMILY); SSF90257 (SUPERFAMILY); SSF90257 (SUPERFAMILY); TMhelix (TMHMM)                         |
| 1309 | c34073_g1_i2_len_7197_path_1_0_906_908_907_907_909_908_3304_14505_3305_3380_3382_3381_7196_4 | 226524 | myosin heavy chain isoform 1              | 2399 | 0         | 89.40% | 0.18   | Coil (COILS); IPR001609 (PRINTS); IPR001609 (SMART); IPR000048 (SMART); IPR027401 (G3DSA:4.10.270.GENE3D); IPR004009 (PFAM); IPR002928 (PFAM); G3DSA:1.20.5.340 (GENE3D); IPR001609 (PFAM); PTHR13140 (PANTHER); PTHR13140:SF364 (PANTHER); TRANSMEMBRANE (PHOBIUS); NON_CYTOPLASMIC_DOMAIN (PHOBIUS); CYTOPLASMIC_DOMAIN (PHOBIUS); TRANSMEMBRANE (PHOBIUS); CYTOPLASMIC_DOMAIN (PHOBIUS); IPR000048 (PROSITE_PROFILES); IPR001609 (PROSITE_PROFILES); SSF90257 (SUPERFAMILY); IPR027417 (SUPERFAMILY); SSF90257 (SUPERFAMILY); SSF90257 (SUPERFAMILY); SSF90257 (SUPERFAMILY); SSF90257 (SUPERFAMILY); SSF90257 (SUPERFAMILY); TMhelix (TMHMM) |
| 1310 | c34088_g1_i1_len_2904_path_5980_0_180_3_099_181_2671_5590_2672_2681_5600_2682_2903_2         | 507    | beta-galactosidase-like isoform x2        | 968  | 0         | 59.70% | 0.127  | IPR001944 (PRINTS); IPR008979 (G3DSA:2.60.120.GENE3D); IPR013781 (G3DSA:3.20.20.GENE3D); IPR001944 (PFAM); IPR001944 (PANTHER); PTHR23421:SF13 (PANTHER); IPR019801 (PROSITE_PATTERNS); NON_CYTOPLASMIC_DOMAIN (PHOBIUS); TRANSMEMBRANE (PHOBIUS); CYTOPLASMIC_DOMAIN (PHOBIUS); IPR008979 (SUPERFAMILY); IPR017853 (SUPERFAMILY)                                                                                                                                                                                                                                                                                                                                                                                                                                              |
| 1311 | c34088_g1_i2_len_2922_path_2900_0_198_3_099_199_2689_5590_2690_2699_5600_2700_2921_2         | 502    | beta-galactosidase-like isoform x4        | 974  | 0         | 59.90% | 0.273  | IPR001944 (PRINTS); IPR001944 (PFAM); IPR013781 (G3DSA:3.20.20.GENE3D); IPR008979 (G3DSA:2.60.120.GENE3D); IPR001944 (PANTHER); PTHR23421:SF13 (PANTHER); IPR019801 (PROSITE_PATTERNS); TRANSMEMBRANE (PHOBIUS); NON_CYTOPLASMIC_DOMAIN (PHOBIUS); NON_CYTOPLASMIC_DOMAIN (PHOBIUS); TRANSMEMBRANE (PHOBIUS); CYTOPLASMIC_DOMAIN (PHOBIUS); IPR017853 (SUPERFAMILY); IPR008979 (SUPERFAMILY)                                                                                                                                                                                                                                                                                                                                                                                   |
| 1312 | c34132_g1_i1_len_1301_path_105_0_1300_1                                                      | 235    | ribosome biogenesis protein wdr12 homolog | 434  | 0         | 74.50% | 0.103  | IPR020472 (PRINTS); IPR001680 (SMART); IPR001680 (PFAM); IPR012972 (PFAM); IPR015943 (G3DSA:2.130.10.GENE3D); PTHR19855 (PANTHER); IPR019775 (PROSITE_PATTERNS); IPR001680 (PROSITE_PROFILES); IPR001680 (PROSITE_PROFILES); IPR017986 (PROSITE_PROFILES); IPR001680 (PROSITE_PROFILES); IPR001680 (PROSITE_PROFILES); IPR028599 (HAMAP); IPR017986 (SUPERFAMILY)                                                                                                                                                                                                                                                                                                                                                                                                              |
| 1313 | c34145_g1_i1_len_2120_path_1_0_779_928_780_2119_0                                            | 370    | pancreatic lipase-related protein 2-like  | 707  | 2.05E-129 | 56.50% | 0.137  | IPR000734 (PRINTS); IPR001024 (G3DSA:2.60.60.GENE3D); IPR013818 (PFAM); IPR029058 (G3DSA:3.40.50.GENE3D); IPR000734 (PANTHER); PTHR11610:SF83 (PANTHER); IPR008976 (SUPERFAMILY); IPR029058 (SUPERFAMILY)                                                                                                                                                                                                                                                                                                                                                                                                                                                                                                                                                                      |
| 1314 | c34145_g1_i2_len_2267_path_1_0_779_781_780_926_928_927_2266_0                                | 433    | pancreatic lipase-related protein 2-like  | 756  | 3.08E-157 | 63.90% | 0.137  | IPR002331 (PRINTS); IPR000734 (PRINTS); IPR013818 (PFAM); IPR001024 (G3DSA:2.60.60.GENE3D); IPR029058 (G3DSA:3.40.50.GENE3D); IPR000734 (PANTHER); PTHR11610:SF83 (PANTHER); IPR029058 (SUPERFAMILY); IPR008976 (SUPERFAMILY)                                                                                                                                                                                                                                                                                                                                                                                                                                                                                                                                                  |
| 1315 | c34150_g1_i1_len_1340_path_1_0_954_2918_955_1136_2115_1137_1138_2094_1139_1339_0             | 275    | prostatic acid phosphatase-like           | 447  | 1.11E-122 | 63.60% | 0.582Y | IPR000560 (PFAM); IPR029033 (G3DSA:3.40.50.GENE3D); PTHR11567 (PANTHER); PTHR11567:SF26 (PANTHER); IPR000560 (PROSITE_PATTERNS); IPR000560 (PROSITE_PATTERNS); NON_CYTOPLASMIC_DOMAIN (PHOBIUS); TRANSMEMBRANE (PHOBIUS); CYTOPLASMIC_DOMAIN (PHOBIUS); SignalP-noTM (SIGNALP_EUK); SignalP-noTM (SIGNALP_GRAM_NEGATIVE); IPR029033 (SUPERFAMILY); TMhelix (TMHMM)                                                                                                                                                                                                                                                                                                                                                                                                             |
| 1316 | c34150_g1_i2_len_1156_path_1_0_954_2094_955_1155_0                                           | 176    | lysosomal acid phosphatase                | 386  | 9.72E-101 | 67.00% | 0.582Y | IPR000560 (PFAM); IPR029033 (G3DSA:3.40.50.GENE3D); PTHR11567 (PANTHER); PTHR11567:SF26 (PANTHER); IPR000560 (PROSITE_PATTERNS); IPR000560 (PROSITE_PATTERNS); SignalP-noTM (SIGNALP_EUK); SignalP-noTM (SIGNALP_GRAM_NEGATIVE); IPR029033 (SUPERFAMILY)                                                                                                                                                                                                                                                                                                                                                                                                                                                                                                                       |



|      |                                                                                                        |      |                                                  |     |           |        |         |                                                                                                                                                                                                                                                                                                                                                                                                                                                                                                                                                                                                                                                      |
|------|--------------------------------------------------------------------------------------------------------|------|--------------------------------------------------|-----|-----------|--------|---------|------------------------------------------------------------------------------------------------------------------------------------------------------------------------------------------------------------------------------------------------------------------------------------------------------------------------------------------------------------------------------------------------------------------------------------------------------------------------------------------------------------------------------------------------------------------------------------------------------------------------------------------------------|
| 1317 | c34169_g1_i1_len_914_path_1600_0_550_44_8_551_626_275_627_716_365_717_740_389_741_766_415_767_799_95_5 | 95   | perlucin-like protein                            | 304 | 1.01E-21  | 53.70% | 0.499 Y | Coil (COILS); IPR001304 (SMART); IPR016186 (G3DSA:3.10.100.GENE3D); IPR001304 (PFAM); PTHR22802 (PANTHER); IPR018378 (PROSITE_PATTERNS); NON_CYTOPLASMIC_DOMAIN (PHOBIUS); CYTOPLASMIC_DOMAIN (PHOBIUS); TRANSMEMBRANE (PHOBIUS); IPR001304 (PROSITE_PROFILES); IPR016187 (SUPERFAMILY); TMhelix (TMHMM)                                                                                                                                                                                                                                                                                                                                             |
| 1318 | c34187_g1_i1_len_1265_path_1_0_1264_0                                                                  | 1146 | ferritin                                         | 422 | 6.73E-83  | 84.70% | 0.183   | Coil (COILS); IPR012347 (G3DSA:1.20.1260.GENE3D); IPR008331 (PFAM); IPR001519 (PANTHER); IPR014034 (PROSITE_PATTERNS); IPR014034 (PROSITE_PATTERNS); TRANSMEMBRANE (PHOBIUS); NON_CYTOPLASMIC_DOMAIN (PHOBIUS); NON_CYTOPLASMIC_DOMAIN (PHOBIUS); TRANSMEMBRANE (PHOBIUS); CYTOPLASMIC_DOMAIN (PHOBIUS); IPR009040 (PROSITE_PROFILES); IPR009078 (SUPERFAMILY); TMhelix (TMHMM); TMhelix (TMHMM)                                                                                                                                                                                                                                                     |
| 1319 | c34221_g4_i1_len_886_path_1911_0_885_3                                                                 | 58   | collagen alpha 1 chain                           | 296 | 7.22E-50  | 69.30% | 0.106   | IPR010515 (PFAM); IPR016186 (G3DSA:3.10.100.GENE3D); IPR026917 (PTHR24023:PANTHER); PTHR24023 (PANTHER); NON_CYTOPLASMIC_DOMAIN (PHOBIUS); TRANSMEMBRANE (PHOBIUS); CYTOPLASMIC_DOMAIN (PHOBIUS); IPR016187 (SUPERFAMILY)                                                                                                                                                                                                                                                                                                                                                                                                                            |
| 1320 | c34299_g1_i1_len_2140_path_679_0_108_46_109_180_859_181_2139_3                                         | 146  | n-sulphoglucosamine partial                      | 699 | 0         | 78.30% | 0.824 Y | Coil (COILS); G3DSA:3.30.1120.10 (GENE3D); IPR017849 (G3DSA:3.40.720.GENE3D); IPR000917 (PFAM); PTHR10342 (PANTHER); PTHR10342:SF76 (PANTHER); IPR024607 (PROSITE_PATTERNS); NON_CYTOPLASMIC_DOMAIN (PHOBIUS); TRANSMEMBRANE (PHOBIUS); CYTOPLASMIC_DOMAIN (PHOBIUS); TRANSMEMBRANE (PHOBIUS); SIGNAL_PEPTIDE_C_REGION (PHOBIUS); SIGNAL_PEPTIDE_N_REGION (PHOBIUS); SIGNAL_PEPTIDE_H_REGION (PHOBIUS); CYTOPLASMIC_DOMAIN (PHOBIUS); TRANSMEMBRANE (PHOBIUS); SIGNAL_PEPTIDE (PHOBIUS); NON_CYTOPLASMIC_DOMAIN (PHOBIUS); SignalP-noTM (SIGNALP_EUK); IPR017850 (SUPERFAMILY)                                                                       |
| 1321 | c34308_g2_i1_len_965_path_105_0_964_1                                                                  | 30   | ankyrin repeat domain-containing protein 6       | 322 | 6.92E-92  | 68.00% | 0.109   | IPR002110 (SMART); IPR020683 (G3DSA:1.25.40.GENE3D); IPR020683 (PFAM); IPR020683 (PROSITE_PROFILES); IPR002110 (PROSITE_PROFILES); IPR020683 (SUPERFAMILY)                                                                                                                                                                                                                                                                                                                                                                                                                                                                                           |
| 1322 | c34327_g1_i1_len_2267_path_5255_0_213_1_428_214_753_1990_754_2266_1                                    | 114  | microtubule-associated protein futsch isoform x1 | 756 | 0         | 76.60% | 0.127   | Coil (COILS); IPR002290 (SMART); G3DSA:3.30.200.20 (GENE3D); G3DSA:1.10.510.10 (GENE3D); IPR000719 (PFAM); PTHR24343:SF26 (PANTHER); PTHR24343 (PANTHER); IPR017441 (PROSITE_PATTERNS); IPR008271 (PROSITE_PATTERNS); IPR000719 (PROSITE_PROFILES); IPR011009 (SUPERFAMILY)                                                                                                                                                                                                                                                                                                                                                                          |
| 1323 | c34327_g1_i2_len_1006_path_984_0_443_14_28_444_983_5514_984_1005_0                                     | 45   | nuak family snf1-like kinase 1                   | 336 | 1.07E-96  | 95.00% | 0.13    | IPR002290 (SMART); G3DSA:1.10.510.10 (GENE3D); G3DSA:3.30.200.20 (GENE3D); IPR000719 (PFAM); PTHR24343 (PANTHER); PTHR24343:SF26 (PANTHER); IPR008271 (PROSITE_PATTERNS); IPR017441 (PROSITE_PATTERNS); IPR000719 (PROSITE_PROFILES); IPR011009 (SUPERFAMILY)                                                                                                                                                                                                                                                                                                                                                                                        |
| 1324 | c34327_g1_i3_len_2497_path_984_0_443_14_28_444_983_1990_984_2496_0                                     | 143  | microtubule-associated protein futsch isoform x1 | 833 | 0         | 75.60% | 0.13    | Coil (COILS); IPR002290 (SMART); G3DSA:3.30.200.20 (GENE3D); IPR000719 (PFAM); G3DSA:1.10.510.10 (GENE3D); PTHR24343 (PANTHER); PTHR24343:SF26 (PANTHER); IPR017441 (PROSITE_PATTERNS); IPR008271 (PROSITE_PATTERNS); IPR000719 (PROSITE_PROFILES); IPR011009 (SUPERFAMILY)                                                                                                                                                                                                                                                                                                                                                                          |
| 1325 | c34378_g1_i1_len_2025_path_1_0_206_208_207_2024_0                                                      | 432  | adp-ribosylation factor 5                        | 675 | 4.25E-112 | 93.20% | 0.264   | IPR006689 (PRINTS); IPR006687 (SMART); IPR024156 (SMART); IPR003579 (SMART); IPR027417 (G3DSA:3.40.50.GENE3D); IPR005225 (TIGRFAM); IPR006689 (PFAM); PTHR11711 (PANTHER); PTHR11711:SF153 (PANTHER); CYTOPLASMIC_DOMAIN (PHOBIUS); NON_CYTOPLASMIC_DOMAIN (PHOBIUS); TRANSMEMBRANE (PHOBIUS); TRANSMEMBRANE (PHOBIUS); NON_CYTOPLASMIC_DOMAIN (PHOBIUS); NON_CYTOPLASMIC_DOMAIN (PHOBIUS); TRANSMEMBRANE (PHOBIUS); CYTOPLASMIC_DOMAIN (PHOBIUS); TRANSMEMBRANE (PHOBIUS); CYTOPLASMIC_DOMAIN (PHOBIUS); IPR024156 (PROSITE_PROFILES); IPR027417 (SUPERFAMILY); TMhelix (TMHMM); TMhelix (TMHMM); TMhelix (TMHMM); TMhelix (TMHMM); TMhelix (TMHMM) |

|      |                                                                        |      |                                                          |      |           |        |        |                                                                                                                                                                                                                                                                                                                                                                                                                                                                                                                                                                                                                                                                                                                                                           |
|------|------------------------------------------------------------------------|------|----------------------------------------------------------|------|-----------|--------|--------|-----------------------------------------------------------------------------------------------------------------------------------------------------------------------------------------------------------------------------------------------------------------------------------------------------------------------------------------------------------------------------------------------------------------------------------------------------------------------------------------------------------------------------------------------------------------------------------------------------------------------------------------------------------------------------------------------------------------------------------------------------------|
| 1326 | c34378_g1_i2_len_2031_path_4053_0_212_208_213_2030_0                   | 411  | adp-ribosylation factor 2                                | 677  | 1.02E-116 | 95.70% | 0.133  | IPR006689 (PRINTS); IPR006687 (SMART); IPR024156 (SMART); IPR003579 (SMART); IPR005225 (TIGRFAM); IPR006689 (PFAM); IPR027417 (G3DSA:3.40.50.GENE3D); PTHR11711 (PANTHER); PTHR11711:SF153 (PANTHER); TRANSMEMBRANE (PHOBIUS); NON_CYTOPLASMIC_DOMAIN (PHOBIUS); CYTOPLASMIC_DOMAIN (PHOBIUS); TRANSMEMBRANE (PHOBIUS); TRANSMEMBRANE (PHOBIUS); NON_CYTOPLASMIC_DOMAIN (PHOBIUS); CYTOPLASMIC_DOMAIN (PHOBIUS); NON_CYTOPLASMIC_DOMAIN (PHOBIUS); CYTOPLASMIC_DOMAIN (PHOBIUS); NON_CYTOPLASMIC_DOMAIN (PHOBIUS); TRANSMEMBRANE (PHOBIUS); TRANSMEMBRANE (PHOBIUS); TRANSMEMBRANE (PHOBIUS); IPR024156 (PROSITE_PROFILES); IPR027417 (SUPERFAMILY); TMhelix (TMHMM); TMhelix (TMHMM); TMhelix (TMHMM); TMhelix (TMHMM); TMhelix (TMHMM); TMhelix (TMHMM) |
| 1327 | c34397_g1_i1_len_3421_path_3541_0_747_4288_748_3420_1                  | 1080 | staphylococcal nuclease domain-containing protein 1-like | 1140 | 0         | 74.40% | 0.147  | Coil (COILS); IPR016071 (SMART); IPR002999 (SMART); G3DSA:2.30.30.140 (GENE3D); IPR016071 (G3DSA:2.40.50.GENE3D); IPR016071 (PFAM); IPR002999 (PFAM); IPR016071 (G3DSA:2.40.50.GENE3D); IPR030481 (PTHR12302:PANTHER); PTHR12302 (PANTHER); CYTOPLASMIC_DOMAIN (PHOBIUS); TRANSMEMBRANE (PHOBIUS); NON_CYTOPLASMIC_DOMAIN (PHOBIUS); IPR002999 (PROSITE_PROFILES); IPR016071 (PROSITE_PROFILES); IPR016071 (PROSITE_PROFILES); IPR016071 (PROSITE_PROFILES); IPR016071 (SUPERFAMILY); SSF63748 (SUPERFAMILY); IPR016071 (SUPERFAMILY); IPR016071 (SUPERFAMILY); IPR016071 (SUPERFAMILY); IPR016071 (SUPERFAMILY); TMhelix (TMHMM); TMhelix (TMHMM)                                                                                                        |
| 1328 | c34424_g1_i1_len_1911_path_1988_0_1910_2                               | 8805 | retinal dehydrogenase 1-like                             | 637  | 0         | 82.10% | 0.117  | IPR016162 (G3DSA:3.40.605.GENE3D); IPR015590 (PFAM); IPR016163 (G3DSA:3.40.309.GENE3D); PTHR11699 (PANTHER); PTHR11699:SF145 (PANTHER); IPR029510 (PROSITE_PATTERNS); IPR016160 (PROSITE_PATTERNS); TRANSMEMBRANE (PHOBIUS); NON_CYTOPLASMIC_DOMAIN (PHOBIUS); NON_CYTOPLASMIC_DOMAIN (PHOBIUS); CYTOPLASMIC_DOMAIN (PHOBIUS); TRANSMEMBRANE (PHOBIUS); IPR016161 (SUPERFAMILY)                                                                                                                                                                                                                                                                                                                                                                           |
| 1329 | c34447_g1_i1_len_937_path_1_0_936_5                                    | 41   | endochitinase isoform x1                                 | 312  | 5.45E-150 | 80.40% | 0.103  | IPR011583 (SMART); IPR001223 (PFAM); IPR013781 (G3DSA:3.20.20.GENE3D); PTHR11177 (PANTHER); PTHR11177:SF144 (PANTHER); IPR001579 (PROSITE_PATTERNS); IPR017853 (SUPERFAMILY)                                                                                                                                                                                                                                                                                                                                                                                                                                                                                                                                                                              |
| 1330 | c34447_g2_i1_len_661_path_2345_0_660_3                                 | 56   | chitinase 5 isoform x1                                   | 221  | 5.86E-58  | 56.90% | 0.105  | IPR002557 (SMART); IPR001223 (PFAM); IPR029070 (G3DSA:3.10.50.GENE3D); IPR002557 (G3DSA:2.170.140.GENE3D); IPR002557 (PFAM); IPR013781 (G3DSA:3.20.20.GENE3D); PTHR11177:SF144 (PANTHER); PTHR11177 (PANTHER); IPR002557 (PROSITE_PROFILES); IPR029070 (SUPERFAMILY); IPR002557 (SUPERFAMILY); IPR017853 (SUPERFAMILY)                                                                                                                                                                                                                                                                                                                                                                                                                                    |
| 1331 | c34459_g1_i1_len_3233_path_6336_0_1380_5865_1381_1851_6336_1852_3232_5 | 788  | chromodomain-helicase-dna-binding protein 7              | 1077 | 1.27E-46  | 50.60% | 0.208  | Coil (COILS); Coil (COILS); Coil (COILS); Coil (COILS); PTHR10799 (PANTHER); PTHR10799:SF536 (PANTHER); SIGNAL_PEPTIDE_N_REGION (PHOBIUS); SIGNAL_PEPTIDE_C_REGION (PHOBIUS); SIGNAL_PEPTIDE_H_REGION (PHOBIUS); SIGNAL_PEPTIDE (PHOBIUS); NON_CYTOPLASMIC_DOMAIN (PHOBIUS)                                                                                                                                                                                                                                                                                                                                                                                                                                                                               |
| 1332 | c34483_g1_i1_len_958_path_986_0_957_4                                  | 172  | plasminogen activator spa                                | 319  | 2.28E-58  | 57.10% | 0.313  | IPR001314 (PRINTS); IPR001254 (SMART); G3DSA:2.40.10.10 (GENE3D); G3DSA:2.40.10.10 (GENE3D); IPR001254 (PFAM); G3DSA:2.40.10.10 (GENE3D); PTHR24276 (PANTHER); IPR018114 (PROSITE_PATTERNS); IPR018114 (PROSITE_PATTERNS); TRANSMEMBRANE (PHOBIUS); NON_CYTOPLASMIC_DOMAIN (PHOBIUS); NON_CYTOPLASMIC_DOMAIN (PHOBIUS); TRANSMEMBRANE (PHOBIUS); CYTOPLASMIC_DOMAIN (PHOBIUS); IPR001254 (PROSITE_PROFILES); IPR009003 (SUPERFAMILY); TMhelix (TMHMM)                                                                                                                                                                                                                                                                                                     |
| 1333 | c34489_g1_i1_len_2376_path_2354_0_861_3216_862_883_3238_884_2375_2     | 212  | laminin subunit gamma-1-like                             | 792  | 8.84E-60  | 67.20% | 0.105  | Coil (COILS); Coil (COILS); Coil (COILS); PTHR10574 (PANTHER); PTHR10574:SF228 (PANTHER); NON_CYTOPLASMIC_DOMAIN (PHOBIUS); CYTOPLASMIC_DOMAIN (PHOBIUS); CYTOPLASMIC_DOMAIN (PHOBIUS); TRANSMEMBRANE (PHOBIUS); TRANSMEMBRANE (PHOBIUS); TRANSMEMBRANE (PHOBIUS); NON_CYTOPLASMIC_DOMAIN (PHOBIUS); TMhelix (TMHMM); TMhelix (TMHMM); TMhelix (TMHMM)                                                                                                                                                                                                                                                                                                                                                                                                    |
| 1334 | c34517_g1_i1_len_1254_path_1232_0_1253_3                               | 250  | low quality protein: selenoprotein h                     | 418  | 6.03E-20  | 65.30% | 0.362Y | IPR020478 (PRINTS); IPR017956 (SMART); IPR017956 (PFAM); IPR012336 (G3DSA:3.40.30.GENE3D); IPR011893 (TIGRFAM); IPR011893 (PFAM); IPR012336 (SUPERFAMILY)                                                                                                                                                                                                                                                                                                                                                                                                                                                                                                                                                                                                 |

|      |                                                                                      |      |                                                         |      |           |        |       |                                                                                                                                                                                                                                                                                                                                                                                                                                                                                                                                                                                                                                                                                                                                                                                          |
|------|--------------------------------------------------------------------------------------|------|---------------------------------------------------------|------|-----------|--------|-------|------------------------------------------------------------------------------------------------------------------------------------------------------------------------------------------------------------------------------------------------------------------------------------------------------------------------------------------------------------------------------------------------------------------------------------------------------------------------------------------------------------------------------------------------------------------------------------------------------------------------------------------------------------------------------------------------------------------------------------------------------------------------------------------|
| 1335 | c34530_g1_i1_len_5084_path_53_0_3149_32_01_3150_3173_3201_3174_3197_6453_3198_5083_2 | 3383 | inter-alpha-trypsin inhibitor heavy chain h3 isoform x2 | 1694 | 1.28E-171 | 54.30% | 0.14  | Coil (COILS); IPR013694 (SMART); IPR006604 (SMART); IPR002035 (SMART); IPR002035 (PFAM); IPR013694 (PFAM); IPR002035 (G3DSA:3.40.50.GENE3D); PTHR10338:SF108 (PANTHER); PTHR10338 (PANTHER); TRANSMEMBRANE (PHOBIUS); CYTOPLASMIC_DOMAIN (PHOBIUS); CYTOPLASMIC_DOMAIN (PHOBIUS); TRANSMEMBRANE (PHOBIUS); TRANSMEMBRANE (PHOBIUS); NON_CYTOPLASMIC_DOMAIN (PHOBIUS); NON_CYTOPLASMIC_DOMAIN (PHOBIUS); IPR013694 (PROSITE_PROFILES); IPR002035 (PROSITE_PROFILES); IPR002035 (SUPERFAMILY)                                                                                                                                                                                                                                                                                              |
| 1336 | c34541_g1_i1_len_3348_path_3426_0_3347_0                                             | 374  | adenosine deaminase cecr1-like                          | 1116 | 1.69E-163 | 65.40% | 0.267 | G3DSA:3.20.20.140 (GENE3D); IPR006331 (TIGRFAM); IPR001365 (PFAM); IPR013659 (PFAM); PTHR11409:SF39 (PANTHER); PTHR11409 (PANTHER); SIGNAL_PEPTIDE_C_REGION (PHOBIUS); SIGNAL_PEPTIDE (PHOBIUS); SIGNAL_PEPTIDE_N_REGION (PHOBIUS); SIGNAL_PEPTIDE_H_REGION (PHOBIUS); NON_CYTOPLASMIC_DOMAIN (PHOBIUS); SSF51556 (SUPERFAMILY); TMhelix (TMHMM)                                                                                                                                                                                                                                                                                                                                                                                                                                         |
| 1337 | c34571_g1_i1_len_1671_path_1853_0_773_7_8_774_1145_3577_1146_1670_0                  | 144  | very low-density lipoprotein receptor isoform x2        | 557  | 8.89E-29  | 44.30% | 0.109 | IPR002172 (PRINTS); IPR002172 (SMART); IPR002172 (G3DSA:4.10.400.GENE3D); IPR002172 (G3DSA:4.10.400.GENE3D); IPR002172 (G3DSA:4.10.400.GENE3D); IPR002172 (PFAM); IPR002172 (G3DSA:4.10.400.GENE3D); PTHR10529 (PANTHER); IPR023415 (PROSITE_PATTERNS); IPR023415 (PROSITE_PATTERNS); IPR023415 (PROSITE_PATTERNS); IPR023415 (PROSITE_PATTERNS); IPR023415 (PROSITE_PATTERNS); CYTOPLASMIC_DOMAIN (PHOBIUS); NON_CYTOPLASMIC_DOMAIN (PHOBIUS); TRANSMEMBRANE (PHOBIUS); IPR002172 (PROSITE_PROFILES); IPR002172 (PROSITE_PROFILES); IPR002172 (PROSITE_PROFILES); IPR002172 (PROSITE_PROFILES); IPR002172 (PROSITE_PROFILES); IPR002172 (PROSITE_PROFILES); IPR002172 (SUPERFAMILY); IPR002172 (SUPERFAMILY); IPR002172 (SUPERFAMILY); IPR002172 (SUPERFAMILY); IPR002172 (SUPERFAMILY) |
| 1338 | c34571_g1_i2_len_543_path_3575_0_17_357_7_18_542_0                                   | 28   | sortilin-related receptor                               | 181  | 1.03E-12  | 59.70% | 0.101 | IPR002172 (PRINTS); IPR002172 (SMART); IPR002172 (PFAM); IPR002172 (G3DSA:4.10.400.GENE3D); IPR002172 (G3DSA:4.10.400.GENE3D); PTHR10529 (PANTHER); IPR023415 (PROSITE_PATTERNS); IPR002172 (PROSITE_PROFILES); IPR002172 (PROSITE_PROFILES); IPR002172 (SUPERFAMILY); IPR002172 (SUPERFAMILY)                                                                                                                                                                                                                                                                                                                                                                                                                                                                                           |
| 1339 | c34571_g1_i3_len_1728_path_1853_0_773_2_1_774_830_78_831_1202_3577_1203_1727_0       | 150  | very low-density lipoprotein receptor isoform x2        | 576  | 3.02E-30  | 43.00% | 0.109 | IPR002172 (PRINTS); IPR002172 (SMART); IPR002172 (PFAM); IPR002172 (G3DSA:4.10.400.GENE3D); IPR002172 (G3DSA:4.10.400.GENE3D); IPR002172 (G3DSA:4.10.400.GENE3D); PTHR10529 (PANTHER); IPR023415 (PROSITE_PATTERNS); IPR023415 (PROSITE_PATTERNS); IPR023415 (PROSITE_PATTERNS); IPR023415 (PROSITE_PATTERNS); TRANSMEMBRANE (PHOBIUS); NON_CYTOPLASMIC_DOMAIN (PHOBIUS); CYTOPLASMIC_DOMAIN (PHOBIUS); IPR002172 (PROSITE_PROFILES); IPR002172 (PROSITE_PROFILES); IPR002172 (PROSITE_PROFILES); IPR002172 (PROSITE_PROFILES); IPR002172 (SUPERFAMILY); IPR002172 (SUPERFAMILY); IPR002172 (SUPERFAMILY); IPR002172 (SUPERFAMILY); IPR002172 (SUPERFAMILY)                                                                                                                              |
| 1340 | c34594_g1_i1_len_4440_path_4666_0_4439_0                                             | 963  | angiotensin-converting enzyme                           | 1480 | 0         | 59.40% | 0.275 | Coil (COILS); Coil (COILS); IPR001548 (PRINTS); IPR001548 (PFAM); IPR002000 (PFAM); PTHR10514:SF17 (PANTHER); IPR001548 (PANTHER); NON_CYTOPLASMIC_DOMAIN (PHOBIUS); CYTOPLASMIC_DOMAIN (PHOBIUS); TRANSMEMBRANE (PHOBIUS); TRANSMEMBRANE (PHOBIUS); NON_CYTOPLASMIC_DOMAIN (PHOBIUS); CYTOPLASMIC_DOMAIN (PHOBIUS); TRANSMEMBRANE (PHOBIUS); TRANSMEMBRANE (PHOBIUS); SSF55486 (SUPERFAMILY); SSF55486 (SUPERFAMILY); TMhelix (TMHMM); TMhelix (TMHMM); TMhelix (TMHMM)                                                                                                                                                                                                                                                                                                                 |
| 1341 | c34611_g2_i1_len_1953_path_457_0_118_48_99_119_1952_5                                | 250  | early growth response                                   | 651  | 3.95E-122 | 54.90% | 0.106 | IPR015880 (SMART); IPR013087 (G3DSA:3.30.160.GENE3D); IPR013087 (G3DSA:3.30.160.GENE3D); PF13465 (PFAM); IPR013087 (G3DSA:3.30.160.GENE3D); PTHR10042 (PANTHER); PTHR10042:SF24 (PANTHER); IPR007087 (PROSITE_PATTERNS); IPR007087 (PROSITE_PATTERNS); IPR007087 (PROSITE_PROFILES); IPR007087 (PROSITE_PROFILES); IPR007087 (PROSITE_PROFILES); SSF57667 (SUPERFAMILY); SSF57667 (SUPERFAMILY)                                                                                                                                                                                                                                                                                                                                                                                          |

|      |                                                                                 |     |                                                                                        |      |           |        |       |                                                                                                                                                                                                                                                                                                                                                                                                                                                                                                                                                                                                                                                                                                                                                                                           |
|------|---------------------------------------------------------------------------------|-----|----------------------------------------------------------------------------------------|------|-----------|--------|-------|-------------------------------------------------------------------------------------------------------------------------------------------------------------------------------------------------------------------------------------------------------------------------------------------------------------------------------------------------------------------------------------------------------------------------------------------------------------------------------------------------------------------------------------------------------------------------------------------------------------------------------------------------------------------------------------------------------------------------------------------------------------------------------------------|
| 1342 | c34645_g1_i1_len_762_path_1_0_761_3                                             | 50  | mam and ldl-receptor class a domain-containing protein 1-like                          | 254  | 1.30E-43  | 64.20% | 0.114 | IPR000998 (SMART); IPR000998 (PFAM); IPR000998 (PROSITE_PROFILES); IPR013320 (SUPERFAMILY)                                                                                                                                                                                                                                                                                                                                                                                                                                                                                                                                                                                                                                                                                                |
| 1343 | c34721_g2_i1_len_2211_path_2515_0_2210_2                                        | 250 | alpha-mannosidase 2                                                                    | 737  | 7.81E-162 | 58.80% | 0.098 | G3DSA:2.70.98.30 (GENE3D); G3DSA:1.10.287.530 (GENE3D); IPR015341 (PFAM); IPR011682 (PFAM); IPR013780 (G3DSA:2.60.40.GENE3D); PTHR11607 (PANTHER); PTHR11607:SF4 (PANTHER); CYTOPLASMIC_DOMAIN (PHOBIUS); NON_CYTOPLASMIC_DOMAIN (PHOBIUS); TRANSMEMBRANE (PHOBIUS); IPR011013 (SUPERFAMILY); IPR028995 (SUPERFAMILY); TMhelix (TMHMM)                                                                                                                                                                                                                                                                                                                                                                                                                                                    |
| 1344 | c34737_g1_i1_len_1358_path_1513_0_468_1_44_469_516_192_517_1164_230_1165_1357_2 | 63  | cuticlin- partial                                                                      | 452  | 0         | 72.80% | 0.163 | IPR001507 (SMART); IPR001507 (PFAM); PTHR22907 (PANTHER); PTHR22907:SF1 (PANTHER); TRANSMEMBRANE (PHOBIUS); CYTOPLASMIC_DOMAIN (PHOBIUS); NON_CYTOPLASMIC_DOMAIN (PHOBIUS); IPR001507 (PROSITE_PROFILES); TMhelix (TMHMM)                                                                                                                                                                                                                                                                                                                                                                                                                                                                                                                                                                 |
| 1345 | c34737_g1_i2_len_1310_path_1513_0_468_1_92_469_1116_230_1117_1309_2             | 75  | cuticlin- partial                                                                      | 436  | 0         | 75.00% | 0.163 | IPR001507 (SMART); IPR001507 (PFAM); PTHR22907 (PANTHER); PTHR22907:SF1 (PANTHER); CYTOPLASMIC_DOMAIN (PHOBIUS); TRANSMEMBRANE (PHOBIUS); NON_CYTOPLASMIC_DOMAIN (PHOBIUS); IPR001507 (PROSITE_PROFILES); TMhelix (TMHMM)                                                                                                                                                                                                                                                                                                                                                                                                                                                                                                                                                                 |
| 1346 | c34760_g1_i1_len_3566_path_6155_0_509_3_074_510_3565_4                          | 345 | cgmp-dependent protein kinase 1-like                                                   | 1189 | 0         | 76.90% | 0.101 | Coil (COILS); IPR002374 (PRINTS); IPR002290 (SMART); IPR000595 (SMART); IPR000961 (SMART); IPR014710 (G3DSA:2.60.120.GENE3D); G3DSA:3.30.200.20 (GENE3D); IPR000719 (PFAM); G3DSA:1.10.510.10 (GENE3D); IPR000595 (PFAM); IPR014710 (G3DSA:2.60.120.GENE3D); PTHR24353 (PANTHER); PTHR24353:SF33 (PANTHER); IPR008271 (PROSITE_PATTERNS); IPR018488 (PROSITE_PATTERNS); IPR017441 (PROSITE_PATTERNS); IPR018488 (PROSITE_PATTERNS); NON_CYTOPLASMIC_DOMAIN (PHOBIUS); TRANSMEMBRANE (PHOBIUS); NON_CYTOPLASMIC_DOMAIN (PHOBIUS); CYTOPLASMIC_DOMAIN (PHOBIUS); TRANSMEMBRANE (PHOBIUS); IPR000595 (PROSITE_PROFILES); IPR000595 (PROSITE_PROFILES); IPR000961 (PROSITE_PROFILES); IPR000719 (PROSITE_PROFILES); IPR018490 (SUPERFAMILY); IPR018490 (SUPERFAMILY); IPR011009 (SUPERFAMILY) |
| 1347 | c34764_g1_i1_len_1119_path_3195_0_1118_2                                        | 101 | nf-kappa-b inhibitor                                                                   | 373  | 1.69E-68  | 67.30% | 0.137 | IPR002110 (SMART); IPR020683 (G3DSA:1.25.40.GENE3D); IPR020683 (PFAM); PTHR24139:SF26 (PANTHER); PTHR24139 (PANTHER); IPR020683 (PROSITE_PROFILES); IPR002110 (PROSITE_PROFILES); IPR002110 (PROSITE_PROFILES); IPR020683 (SUPERFAMILY)                                                                                                                                                                                                                                                                                                                                                                                                                                                                                                                                                   |
| 1348 | c34780_g1_i1_len_1298_path_151_0_1111_5_0_1112_1297_4                           | 333 | mite allergen lep d partial                                                            | 433  | 7.89E-11  | 46.00% | 0.259 | PTHR11008:SF13 (PANTHER); PTHR11008 (PANTHER); NON_CYTOPLASMIC_DOMAIN (PHOBIUS); TRANSMEMBRANE (PHOBIUS); CYTOPLASMIC_DOMAIN (PHOBIUS); TMhelix (TMHMM); TMhelix (TMHMM)                                                                                                                                                                                                                                                                                                                                                                                                                                                                                                                                                                                                                  |
| 1349 | c34780_g1_i2_len_1421_path_151_0_1111_1_259_1112_1234_50_1235_1420_4            | 553 | mite allergen lep d partial                                                            | 474  | 1.02E-10  | 46.33% | 0.199 | PTHR11008 (PANTHER); PTHR11008:SF13 (PANTHER); NON_CYTOPLASMIC_DOMAIN (PHOBIUS); CYTOPLASMIC_DOMAIN (PHOBIUS); TRANSMEMBRANE (PHOBIUS); TMhelix (TMHMM); TMhelix (TMHMM)                                                                                                                                                                                                                                                                                                                                                                                                                                                                                                                                                                                                                  |
| 1350 | c34791_g1_i1_len_682_path_6373_0_160_58_29_161_681_1                            | 20  | sh3 domain-containing ring finger protein 3 isoform x1                                 | 227  | 1.88E-43  | 65.40% | 0.115 | IPR001452 (SMART); G3DSA:2.30.30.40 (GENE3D); IPR001452 (PFAM); PTHR10661:SF7 (PANTHER); PTHR10661 (PANTHER); IPR001452 (PROSITE_PROFILES); IPR001452 (SUPERFAMILY)                                                                                                                                                                                                                                                                                                                                                                                                                                                                                                                                                                                                                       |
| 1351 | c34817_g1_i1_len_444_path_1135_0_391_56_6_392_443_0                             | 11  | achain crystal structure of engineered northeast structural genomics consortium target | 148  | 1.03E-24  | 60.10% | 0.137 | IPR002110 (SMART); PF13637 (PFAM); IPR020683 (G3DSA:1.25.40.GENE3D); IPR020683 (PFAM); PTHR24198 (PANTHER); IPR002110 (PROSITE_PROFILES); IPR002110 (PROSITE_PROFILES); IPR020683 (PROSITE_PROFILES); IPR020683 (SUPERFAMILY)                                                                                                                                                                                                                                                                                                                                                                                                                                                                                                                                                             |
| 1352 | c34830_g1_i1_len_1215_path_1_0_1214_3                                           | 52  | leucine-rich repeat neuronal protein 1-like                                            | 405  | 7.68E-90  | 49.20% | 0.129 | IPR003591 (SMART); G3DSA:3.80.10.10 (GENE3D); G3DSA:3.80.10.10 (GENE3D); IPR001611 (PFAM); PTHR24365 (PANTHER); IPR001611 (PROSITE_PROFILES); SSF52058 (SUPERFAMILY)                                                                                                                                                                                                                                                                                                                                                                                                                                  |
| 1353 | c34850_g1_i1_len_1290_path_1377_0_232_2_1_233_805_2181_806_815_77_816_1289_4    | 52  | ankyrin repeat and socs box-containing protein 2 isoform x1                            | 430  | 4.83E-20  | 40.90% | 0.176 | IPR002110 (SMART); IPR001496 (SMART); IPR020683 (PFAM); IPR020683 (G3DSA:1.25.40.GENE3D); IPR001496 (PFAM); PTHR24188 (PANTHER); PTHR24188:SF32 (PANTHER); TRANSMEMBRANE (PHOBIUS); CYTOPLASMIC_DOMAIN (PHOBIUS); NON_CYTOPLASMIC_DOMAIN (PHOBIUS); TRANSMEMBRANE (PHOBIUS); CYTOPLASMIC_DOMAIN (PHOBIUS); IPR020683 (PROSITE_PROFILES); IPR001496 (PROSITE_PROFILES); IPR002110 (PROSITE_PROFILES); SSF158235 (SUPERFAMILY); IPR020683 (SUPERFAMILY)                                                                                                                                                                                                                                                                                                                                     |

|      |                                                                                                        |       |                                       |      |          |        |        |                                                                                                                                                                                                                                                                                                                                                                                                                                                                                                                                                                                                                                                                |
|------|--------------------------------------------------------------------------------------------------------|-------|---------------------------------------|------|----------|--------|--------|----------------------------------------------------------------------------------------------------------------------------------------------------------------------------------------------------------------------------------------------------------------------------------------------------------------------------------------------------------------------------------------------------------------------------------------------------------------------------------------------------------------------------------------------------------------------------------------------------------------------------------------------------------------|
| 1354 | c34850_g1_i2_len_1077_path_1_0_19_21__2_0_592_2181_593_602_77_603_1076_4                               | 38    | ankyrin repeat and socs box protein 3 | 359  | 7.33E-18 | 45.20% | 0.176  | IPR002110 (SMART); IPR020683 (PFAM); IPR020683 (G3DSA:1.25.40.GENE3D); PTHR24198 (PANTHER); NON_CYTOPLASMIC_DOMAIN (PHOBIUS); CYTOPLASMIC_DOMAIN (PHOBIUS); TRANSMEMBRANE (PHOBIUS); CYTOPLASMIC_DOMAIN (PHOBIUS); TRANSMEMBRANE (PHOBIUS); IPR020683 (PROSITE_PROFILES); IPR002110 (PROSITE_PROFILES); IPR020683 (SUPERFAMILY)                                                                                                                                                                                                                                                                                                                                |
| 1355 | c34863_g1_i2_len_3109_path_3087_0_2898_5986_2899_2905_5993_2906_2961_6049_29_62_2966_6054_2967_2983_0  | 229   | carboxypeptidase d-like               | 1037 | 0        | 64.20% | 0.294  | Coil (COILS); IPR000834 (PRINTS); IPR000834 (SMART); G3DSA:3.40.630.10 (GENE3D); IPR014766 (G3DSA:2.60.40.GENE3D); PF13620 (PFAM); IPR000834 (PFAM); G3DSA:3.40.630.10 (GENE3D); PTHR11532 (PANTHER); IPR015567 (PTHR11532:PANTHER); IPR000834 (PROSITE_PATTERNS); IPR000834 (PROSITE_PATTERNS); IPR000834 (PROSITE_PATTERNS); IPR000834 (PROSITE_PATTERNS); SIGNAL_PEPTIDE_N_REGION (PHOBIUS); SIGNAL_PEPTIDE (PHOBIUS); SIGNAL_PEPTIDE_H_REGION (PHOBIUS); SIGNAL_PEPTIDE_C_REGION (PHOBIUS); NON_CYTOPLASMIC_DOMAIN (PHOBIUS); PS51257 (PROSITE_PROFILES); IPR008969 (SUPERFAMILY); IPR008969 (SUPERFAMILY); SSF53187 (SUPERFAMILY); SSF53187 (SUPERFAMILY) |
| 1356 | c34865_g1_i1_len_2391_path_1_0_2390_1                                                                  | 120   | Pro-interleukin-16                    | 797  | 3.36E-97 | 65.20% | 0.107  | Coil (COILS); IPR001478 (SMART); IPR001478 (PFAM); IPR001478 (G3DSA:2.30.42.GENE3D); IPR001478 (G3DSA:2.30.42.GENE3D); PTHR11324 (PANTHER); IPR001478 (PROSITE_PROFILES); IPR001478 (PROSITE_PROFILES); IPR001478 (SUPERFAMILY); IPR001478 (SUPERFAMILY)                                                                                                                                                                                                                                                                                                                                                                                                       |
| 1357 | c34883_g1_i1_len_994_path_1_0_900_902_9_01_903_905_904_993_5                                           | 13011 | trypsinogen 2                         | 331  | 1.30E-72 | 62.40% | 0.811Y | IPR001314 (PRINTS); IPR001254 (SMART); G3DSA:2.40.10.10 (GENE3D); G3DSA:2.40.10.10 (GENE3D); G3DSA:2.40.10.10 (GENE3D); IPR001254 (PFAM); PTHR24265 (PANTHER); SIGNAL_PEPTIDE_C_REGION (PHOBIUS); SIGNAL_PEPTIDE (PHOBIUS); NON_CYTOPLASMIC_DOMAIN (PHOBIUS); SIGNAL_PEPTIDE_H_REGION (PHOBIUS); SIGNAL_PEPTIDE_N_REGION (PHOBIUS); IPR001254 (PROSITE_PROFILES); SignalP-TM (SIGNALP_GRAM_POSITIVE); SignalP-noTM (SIGNALP_EUK); IPR009003 (SUPERFAMILY)                                                                                                                                                                                                      |
| 1358 | c34910_g1_i1_len_3007_path_49_0_1679_17_28_1680_1681_24_1682_3006_1                                    | 1300  | carboxypeptidase q-like               | 1002 | 0        | 75.80% | 0.242  | IPR007484 (PFAM); G3DSA:3.40.630.10 (GENE3D); PTHR12053 (PANTHER); TRANSMEMBRANE (PHOBIUS); TRANSMEMBRANE (PHOBIUS); TRANSMEMBRANE (PHOBIUS); TRANSMEMBRANE (PHOBIUS); NON_CYTOPLASMIC_DOMAIN (PHOBIUS); TRANSMEMBRANE (PHOBIUS); CYTOPLASMIC_DOMAIN (PHOBIUS); CYTOPLASMIC_DOMAIN (PHOBIUS); CYTOPLASMIC_DOMAIN (PHOBIUS); CYTOPLASMIC_DOMAIN (PHOBIUS); TRANSMEMBRANE (PHOBIUS); NON_CYTOPLASMIC_DOMAIN (PHOBIUS); NON_CYTOPLASMIC_DOMAIN (PHOBIUS); TRANSMEMBRANE (PHOBIUS); NON_CYTOPLASMIC_DOMAIN (PHOBIUS); SSF53187 (SUPERFAMILY); TMhelix (TMHMM); TMhelix (TMHMM); TMhelix (TMHMM); TMhelix (TMHMM); TMhelix (TMHMM)                                  |
| 1359 | c34924_g1_i1_len_3369_path_1995_0_803_2_799_804_2016_3998_2017_2040_3998_2041_2064_3998_2065_2088_53_0 | 2457  | zinc finger protein on ecdysone puffs | 1123 | 6.68E-57 | 60.30% | 0.153  | Coil (COILS); Coil (COILS); Coil (COILS); Coil (COILS); G3DSA:1.10.601.10 (GENE3D); PF12874 (PFAM); PTHR15491 (PANTHER); IPR026811 (PTHR15491:PANTHER); IPR007087 (PROSITE_PATTERNS); CYTOPLASMIC_DOMAIN (PHOBIUS); TRANSMEMBRANE (PHOBIUS); CYTOPLASMIC_DOMAIN (PHOBIUS); TRANSMEMBRANE (PHOBIUS); NON_CYTOPLASMIC_DOMAIN (PHOBIUS); TMhelix (TMHMM); TMhelix (TMHMM)                                                                                                                                                                                                                                                                                         |
| 1360 | c34924_g1_i2_len_2747_path_6669_0_205_2_799_206_1418_3998_1419_1442_3998_1443_1466_5364_1467_2746_2    | 1944  | zinc finger protein on ecdysone puffs | 915  | 4.44E-56 | 62.50% | 0.273  | Coil (COILS); Coil (COILS); Coil (COILS); PF12874 (PFAM); G3DSA:1.10.601.10 (GENE3D); PTHR15491 (PANTHER); IPR026811 (PTHR15491:PANTHER); IPR007087 (PROSITE_PATTERNS); TRANSMEMBRANE (PHOBIUS); NON_CYTOPLASMIC_DOMAIN (PHOBIUS); CYTOPLASMIC_DOMAIN (PHOBIUS); TRANSMEMBRANE (PHOBIUS); CYTOPLASMIC_DOMAIN (PHOBIUS); SSF57667 (SUPERFAMILY); TMhelix (TMHMM); TMhelix (TMHMM)                                                                                                                                                                                                                                                                               |
| 1361 | c34924_g1_i3_len_3345_path_1995_0_803_2_799_804_2016_3998_2017_2040_3998_2041_2064_5364_2065_3344_0    | 2583  | zinc finger protein on ecdysone puffs | 1115 | 1.66E-55 | 63.50% | 0.153  | Coil (COILS); Coil (COILS); Coil (COILS); Coil (COILS); PF12874 (PFAM); G3DSA:1.10.601.10 (GENE3D); IPR026811 (PTHR15491:PANTHER); PTHR15491 (PANTHER); IPR007087 (PROSITE_PATTERNS); CYTOPLASMIC_DOMAIN (PHOBIUS); NON_CYTOPLASMIC_DOMAIN (PHOBIUS); TRANSMEMBRANE (PHOBIUS); TRANSMEMBRANE (PHOBIUS); CYTOPLASMIC_DOMAIN (PHOBIUS); TMhelix (TMHMM); TMhelix (TMHMM)                                                                                                                                                                                                                                                                                         |



|      |                                                                                    |      |                                                       |     |           |        |       |                                                                                                                                                                                                                                                                                                                                                                                                                                                                                                                                                                                                                                      |
|------|------------------------------------------------------------------------------------|------|-------------------------------------------------------|-----|-----------|--------|-------|--------------------------------------------------------------------------------------------------------------------------------------------------------------------------------------------------------------------------------------------------------------------------------------------------------------------------------------------------------------------------------------------------------------------------------------------------------------------------------------------------------------------------------------------------------------------------------------------------------------------------------------|
| 1362 | c34985_g1_i1_len_2475_path_4994_0_291_2_5_292_733_467_734_2474_5                   | 473  | stabilin-1 isoform x1                                 | 825 | 1.59E-126 | 65.90% | 0.204 | IPR000742 (SMART); G3DSA:2.10.25.10 (GENE3D); G3DSA:2.10.25.10 (GENE3D); G3DSA:2.10.25.10 (GENE3D); IPR013032 (PFAM); IPR013032 (PROSITE_PATTERNS); CYTOPLASMIC_DOMAIN (PHOBIUS); NON_CYTOPLASMIC_DOMAIN (PHOBIUS); TRANSMEMBRANE (PHOBIUS); IPR000742 (PROSITE_PROFILES); IPR000742 (PROSITE_PROFILES); IPR000742 (PROSITE_PROFILES); IPR000742 (PROSITE_PROFILES); IPR000742 (PROSITE_PROFILES); IPR000742 (PROSITE_PROFILES); TMhelix (TMHMM) |
| 1363 | c34996_g1_i1_len_2751_path_2879_0_2750_2                                           | 489  | phenoloxidase subunit a3-like                         | 917 | 0         | 67.40% | 0.19  | IPR013788 (PRINTS); IPR008922 (G3DSA:1.10.1280.GENE3D); IPR005203 (G3DSA:2.60.40.GENE3D); IPR005204 (PFAM); IPR000896 (PFAM); IPR005203 (PFAM); IPR005204 (G3DSA:1.20.1370.GENE3D); PTHR11511:SF24 (PANTHER); IPR013788 (PANTHER); IPR002227 (PROSITE_PATTERNS); IPR013788 (PROSITE_PATTERNS); IPR013788 (PROSITE_PATTERNS); IPR008922 (SUPERFAMILY); IPR014756 (SUPERFAMILY); IPR005204 (SUPERFAMILY)                                                                                                                                                                                                                               |
| 1364 | c35008_g1_i1_len_1905_path_163_0_57_22_58_73_38_74_428_573_429_434_162_435_1904_0  | 5438 | universal minicircle sequence binding protein         | 635 | 2.32E-29  | 51.90% | 0.173 | Coil (COILS); Coil (COILS); IPR001878 (SMART); IPR001878 (G3DSA:4.10.60.GENE3D); IPR001878 (PFAM); IPR001878 (G3DSA:4.10.60.GENE3D); PTHR23002 (PANTHER); TRANSMEMBRANE (PHOBIUS); NON_CYTOPLASMIC_DOMAIN (PHOBIUS); TRANSMEMBRANE (PHOBIUS); NON_CYTOPLASMIC_DOMAIN (PHOBIUS); TRANSMEMBRANE (PHOBIUS); CYTOPLASMIC_DOMAIN (PHOBIUS); CYTOPLASMIC_DOMAIN (PHOBIUS); IPR001878 (PROSITE_PROFILES); IPR001878 (PROSITE_PROFILES); IPR001878 (PROSITE_PROFILES); IPR001878 (PROSITE_PROFILES); IPR001878 (PROSITE_PROFILES); IPR001878 (SUPERFAMILY); IPR001878 (SUPERFAMILY)                                                          |
| 1365 | c35008_g1_i2_len_1889_path_163_0_57_38_58_412_573_413_418_162_419_1888_2           | 5763 | universal minicircle sequence binding protein         | 629 | 7.73E-30  | 51.90% | 0.121 | Coil (COILS); Coil (COILS); IPR001878 (SMART); IPR001878 (G3DSA:4.10.60.GENE3D); IPR001878 (PFAM); IPR001878 (G3DSA:4.10.60.GENE3D); PTHR23002 (PANTHER); NON_CYTOPLASMIC_DOMAIN (PHOBIUS); CYTOPLASMIC_DOMAIN (PHOBIUS); TRANSMEMBRANE (PHOBIUS); NON_CYTOPLASMIC_DOMAIN (PHOBIUS); TRANSMEMBRANE (PHOBIUS); TRANSMEMBRANE (PHOBIUS); CYTOPLASMIC_DOMAIN (PHOBIUS); IPR001878 (PROSITE_PROFILES); IPR001878 (PROSITE_PROFILES); IPR001878 (PROSITE_PROFILES); IPR001878 (PROSITE_PROFILES); IPR001878 (PROSITE_PROFILES); IPR001878 (SUPERFAMILY); IPR001878 (SUPERFAMILY)                                                          |
| 1366 | c35041_g1_i1_len_1856_path_1984_0_1855_1                                           | 186  | serine-aspartate repeat protein f                     | 619 | 4.50E-16  | 47.90% | 0.1   | NON_CYTOPLASMIC_DOMAIN (PHOBIUS); CYTOPLASMIC_DOMAIN (PHOBIUS); TRANSMEMBRANE (PHOBIUS)                                                                                                                                                                                                                                                                                                                                                                                                                                                                                                                                              |
| 1367 | c35041_g1_i1_len_1856_path_1984_0_1855_5                                           | 186  | collagen alpha- chain                                 | 618 | 6.46E-132 | 71.80% | 0.104 | IPR001442 (SMART); IPR001442 (G3DSA:2.170.240.GENE3D); IPR008160 (PFAM); IPR001442 (PFAM); PTHR24023:SF381 (PANTHER); PTHR24023 (PANTHER); CYTOPLASMIC_DOMAIN (PHOBIUS); NON_CYTOPLASMIC_DOMAIN (PHOBIUS); TRANSMEMBRANE (PHOBIUS); TRANSMEMBRANE (PHOBIUS); IPR001442 (PROSITE_PROFILES); IPR001442 (PROSITE_PROFILES); IPR016187 (SUPERFAMILY); IPR016187 (SUPERFAMILY); IPR016187 (SUPERFAMILY); TMhelix (TMHMM); TMhelix (TMHMM)                                                                                                                                                                                                 |
| 1368 | c35056_g1_i1_len_833_path_449_0_446_896_447_832_4                                  | 55   | ankyrin repeat and socs box protein 3-like isoform x1 | 278 | 3.89E-38  | 58.90% | 0.118 | IPR002110 (PRINTS); IPR002110 (SMART); PF13637 (PFAM); IPR020683 (PFAM); IPR020683 (G3DSA:1.25.40.GENE3D); PTHR24188:SF24 (PANTHER); PTHR24188 (PANTHER); IPR002110 (PROSITE_PROFILES); IPR020683 (PROSITE_PROFILES); IPR002110 (PROSITE_PROFILES); IPR002110 (PROSITE_PROFILES); IPR002110 (PROSITE_PROFILES); IPR020683 (SUPERFAMILY)                                                                                                                                                                                                                                                                                              |
| 1369 | c35057_g1_i1_len_494_path_93_0_336_430_337_349_443_350_381_71_382_402_92_403_493_5 | 14   | zinc finger protein                                   | 164 | 4.32E-20  | 60.70% | 0.103 | IPR015880 (SMART); PF13894 (PFAM); IPR013087 (G3DSA:3.30.160.GENE3D); IPR013087 (G3DSA:3.30.160.GENE3D); IPR007087 (PFAM); IPR013087 (G3DSA:3.30.160.GENE3D); PTHR24409 (PANTHER); PTHR24409:SF14 (PANTHER); IPR007087 (PROSITE_PATTERNS); IPR007087 (PROSITE_PATTERNS); IPR007087 (PROSITE_PROFILES); IPR007087 (PROSITE_PROFILES); IPR007087 (PROSITE_PROFILES); SSF57667 (SUPERFAMILY); SSF57667 (SUPERFAMILY)                                                                                                                                                                                                                    |



|      |                                                                                                      |       |                                              |      |          |        |       |                                                                                                                                                                                                                                                                                                                                                                                                                                                                                                                                                                                                                                                  |
|------|------------------------------------------------------------------------------------------------------|-------|----------------------------------------------|------|----------|--------|-------|--------------------------------------------------------------------------------------------------------------------------------------------------------------------------------------------------------------------------------------------------------------------------------------------------------------------------------------------------------------------------------------------------------------------------------------------------------------------------------------------------------------------------------------------------------------------------------------------------------------------------------------------------|
| 1382 | c35206_g1_i1_len_2102_path_3443_0_1050_746_1051_2101_5                                               | 25071 | glyceraldehyde-3-phosphate dehydrogenase     | 700  | 0        | 90.30% | 0.14  | IPR020831 (PRINTS); IPR020828 (SMART); IPR006424 (TIGRFAM); G3DSA:3.30.360.10 (GENE3D); IPR020829 (PFAM); IPR016040 (G3DSA:3.40.50.GENE3D); IPR020828 (PFAM); IPR020831 (PANTHER); IPR020830 (PROSITE_PATTERNS); TRANSMEMBRANE (PHOBIUS); TRANSMEMBRANE (PHOBIUS); TRANSMEMBRANE (PHOBIUS); NON_CYTOPLASMIC_DOMAIN (PHOBIUS); CYTOPLASMIC_DOMAIN (PHOBIUS); NON_CYTOPLASMIC_DOMAIN (PHOBIUS); CYTOPLASMIC_DOMAIN (PHOBIUS); CYTOPLASMIC_DOMAIN (PHOBIUS); NON_CYTOPLASMIC_DOMAIN (PHOBIUS); TRANSMEMBRANE (PHOBIUS); SSF51735 (SUPERFAMILY); SSF55347 (SUPERFAMILY); TMhelix (TMHMM); TMhelix (TMHMM); TMhelix (TMHMM)                           |
| 1383 | c35206_g1_i2_len_1696_path_105_0_644_74_6_645_1695_5                                                 | 31033 | glyceraldehyde-3-phosphate dehydrogenase     | 565  | 0        | 89.90% | 0.14  | IPR020831 (PRINTS); IPR020828 (SMART); IPR020828 (PFAM); G3DSA:3.30.360.10 (GENE3D); IPR020829 (PFAM); IPR006424 (TIGRFAM); IPR016040 (G3DSA:3.40.50.GENE3D); IPR020831 (PANTHER); IPR020830 (PROSITE_PATTERNS); CYTOPLASMIC_DOMAIN (PHOBIUS); TRANSMEMBRANE (PHOBIUS); NON_CYTOPLASMIC_DOMAIN (PHOBIUS); CYTOPLASMIC_DOMAIN (PHOBIUS); TRANSMEMBRANE (PHOBIUS); SSF55347 (SUPERFAMILY); SSF51735 (SUPERFAMILY)                                                                                                                                                                                                                                  |
| 1384 | c35217_g1_i1_len_1712_path_1690_0_53_17_44_54_405_2096_406_1177_5036_1178_11_78_2869_1179_1711_2     | 92    | zinc finger protein glis2 homolog            | 570  | 5.39E-76 | 74.10% | 0.103 | IPR015880 (SMART); IPR013087 (G3DSA:3.30.160.GENE3D); PF13465 (PFAM); IPR007087 (PFAM); IPR013087 (G3DSA:3.30.160.GENE3D); IPR013087 (G3DSA:3.30.160.GENE3D); IPR013087 (G3DSA:3.30.160.GENE3D); IPR013087 (G3DSA:3.30.160.GENE3D); PTHR19818 (PANTHER); IPR007087 (PROSITE_PATTERNS); IPR007087 (PROSITE_PATTERNS); IPR007087 (PROSITE_PATTERNS); IPR007087 (PROSITE_PATTERNS); CYTOPLASMIC_DOMAIN (PHOBIUS); NON_CYTOPLASMIC_DOMAIN (PHOBIUS); TRANSMEMBRANE (PHOBIUS); IPR007087 (PROSITE_PROFILES); IPR007087 (PROSITE_PROFILES); IPR007087 (PROSITE_PROFILES); IPR007087 (PROSITE_PROFILES); SSF57667 (SUPERFAMILY); SSF57667 (SUPERFAMILY) |
| 1385 | c35217_g1_i3_len_1677_path_1690_0_53_17_44_54_405_2096_406_1177_5036_1178_11_78_4976_1179_1193_436_2 | 80    | zinc finger protein glis2-like               | 559  | 4.17E-75 | 73.30% | 0.103 | IPR015880 (SMART); IPR007087 (PFAM); IPR013087 (G3DSA:3.30.160.GENE3D); IPR013087 (G3DSA:3.30.160.GENE3D); IPR013087 (G3DSA:3.30.160.GENE3D); PF13465 (PFAM); IPR013087 (G3DSA:3.30.160.GENE3D); IPR013087 (G3DSA:3.30.160.GENE3D); PTHR19818 (PANTHER); IPR007087 (PROSITE_PATTERNS); IPR007087 (PROSITE_PATTERNS); IPR007087 (PROSITE_PATTERNS); IPR007087 (PROSITE_PATTERNS); NON_CYTOPLASMIC_DOMAIN (PHOBIUS); TRANSMEMBRANE (PHOBIUS); CYTOPLASMIC_DOMAIN (PHOBIUS); IPR007087 (PROSITE_PROFILES); IPR007087 (PROSITE_PROFILES); IPR007087 (PROSITE_PROFILES); IPR007087 (PROSITE_PROFILES); SSF57667 (SUPERFAMILY); SSF57667 (SUPERFAMILY) |
| 1386 | c35219_g1_i1_len_2317_path_2395_0_2316_5                                                             | 1041  | n-acetylgalactosamine-6-sulfatase isoform x1 | 772  | 0        | 77.60% | 0.104 | IPR017849 (G3DSA:3.40.720.GENE3D); G3DSA:3.30.1120.10 (GENE3D); IPR000917 (PFAM); PF14707 (PFAM); PTHR10342 (PANTHER); PTHR10342:SF27 (PANTHER); IPR024607 (PROSITE_PATTERNS); TRANSMEMBRANE (PHOBIUS); CYTOPLASMIC_DOMAIN (PHOBIUS); TRANSMEMBRANE (PHOBIUS); NON_CYTOPLASMIC_DOMAIN (PHOBIUS); NON_CYTOPLASMIC_DOMAIN (PHOBIUS); CYTOPLASMIC_DOMAIN (PHOBIUS); TRANSMEMBRANE (PHOBIUS); TRANSMEMBRANE (PHOBIUS); IPR017850 (SUPERFAMILY); TMhelix (TMHMM); TMhelix (TMHMM)                                                                                                                                                                     |
| 1387 | c35234_g1_i1_len_3365_path_157_0_3232_3384_3233_3276_3384_3277_3320_3384_3321_3364_1                 | 446   | arylsulfatase b                              | 1122 | 0        | 72.00% | 0.229 | IPR000917 (PFAM); G3DSA:3.30.1120.10 (GENE3D); IPR017849 (G3DSA:3.40.720.GENE3D); PTHR10342 (PANTHER); PTHR10342:SF189 (PANTHER); IPR024607 (PROSITE_PATTERNS); IPR024607 (PROSITE_PATTERNS); TRANSMEMBRANE (PHOBIUS); TRANSMEMBRANE (PHOBIUS); NON_CYTOPLASMIC_DOMAIN (PHOBIUS); NON_CYTOPLASMIC_DOMAIN (PHOBIUS); CYTOPLASMIC_DOMAIN (PHOBIUS); TRANSMEMBRANE (PHOBIUS); TRANSMEMBRANE (PHOBIUS); CYTOPLASMIC_DOMAIN (PHOBIUS); TRANSMEMBRANE (PHOBIUS); IPR017850 (SUPERFAMILY); TMhelix (TMHMM); TMhelix (TMHMM); TMhelix (TMHMM)                                                                                                            |

|      |                                                                                    |       |                                                                         |     |           |        |         |                                                                                                                                                                                                                                                                                                                                                                                                                                                                                                                                                                |
|------|------------------------------------------------------------------------------------|-------|-------------------------------------------------------------------------|-----|-----------|--------|---------|----------------------------------------------------------------------------------------------------------------------------------------------------------------------------------------------------------------------------------------------------------------------------------------------------------------------------------------------------------------------------------------------------------------------------------------------------------------------------------------------------------------------------------------------------------------|
| 1388 | c35242_g1_i1_len_2699_path_2777_0_2698_1                                           | 428   | sel1l protein                                                           | 900 | 0         | 77.70% | 0.288   | Coil (COILS); IPR006597 (SMART); IPR006597 (PFAM); IPR011990 (G3DSA:1.25.40.GENE3D); IPR011990 (G3DSA:1.25.40.GENE3D); PTHR11102:SF55 (PANTHER); PTHR11102 (PANTHER); TRANSMEMBRANE (PHOBIUS); TRANSMEMBRANE (PHOBIUS); NON_CYTOPLASMIC_DOMAIN (PHOBIUS); SIGNAL_PEPTIDE_C_REGION (PHOBIUS); SIGNAL_PEPTIDE_N_REGION (PHOBIUS); SIGNAL_PEPTIDE_H_REGION (PHOBIUS); SIGNAL_PEPTIDE (PHOBIUS); NON_CYTOPLASMIC_DOMAIN (PHOBIUS); CYTOPLASMIC_DOMAIN (PHOBIUS); SSF81901 (SUPERFAMILY); SSF81901 (SUPERFAMILY); TMhelix (TMHMM); TMhelix (TMHMM); TMhelix (TMHMM) |
| 1389 | c35262_g1_i1_len_1476_path_109_0_1475_4                                            | 175   | reelin- partial                                                         | 492 | 3.71E-94  | 62.30% | 0.104   | G3DSA:2.10.25.10 (GENE3D); IPR013111 (PFAM); PTHR11841 (PANTHER); IPR013032 (PROSITE_PATTERNS); IPR013032 (PROSITE_PATTERNS); CYTOPLASMIC_DOMAIN (PHOBIUS); NON_CYTOPLASMIC_DOMAIN (PHOBIUS); TRANSMEMBRANE (PHOBIUS)                                                                                                                                                                                                                                                                                                                                          |
| 1390 | c35265_g3_i1_len_424_path_2618_0_423_4                                             | 8     | apical endosomal glycoprotein                                           | 141 | 3.22E-38  | 60.00% | 0.112   | IPR000998 (PFAM); PTHR23282 (PANTHER); IPR000998 (PROSITE_PROFILES); IPR000998 (PROSITE_PROFILES); IPR013320 (SUPERFAMILY); IPR013320 (SUPERFAMILY)                                                                                                                                                                                                                                                                                                                                                                                                            |
| 1391 | c35270_g1_i1_len_2507_path_1_0_220_222_221_221_223_222_439_441_440_2506_0          | 288   | trehalase-like isoform x1                                               | 836 | 0         | 69.40% | 0.163   | IPR001661 (PRINTS); IPR001661 (PFAM); PTHR23403:SF1 (PANTHER); IPR001661 (PANTHER); IPR018232 (PROSITE_PATTERNS); IPR018232 (PROSITE_PATTERNS); CYTOPLASMIC_DOMAIN (PHOBIUS); NON_CYTOPLASMIC_DOMAIN (PHOBIUS); TRANSMEMBRANE (PHOBIUS); CYTOPLASMIC_DOMAIN (PHOBIUS); TRANSMEMBRANE (PHOBIUS); IPR008928 (SUPERFAMILY)                                                                                                                                                                                                                                        |
| 1392 | c35275_g1_i1_len_1550_path_1584_0_1361_29_1362_1549_3                              | 186   | cyclin-c                                                                | 517 | 2.27E-164 | 90.90% | 0.102   | IPR013763 (SMART); IPR013763 (G3DSA:1.10.472.GENE3D); IPR006671 (PFAM); IPR015429 (PANTHER); NON_CYTOPLASMIC_DOMAIN (PHOBIUS); NON_CYTOPLASMIC_DOMAIN (PHOBIUS); CYTOPLASMIC_DOMAIN (PHOBIUS); TRANSMEMBRANE (PHOBIUS); TRANSMEMBRANE (PHOBIUS); TRANSMEMBRANE (PHOBIUS); CYTOPLASMIC_DOMAIN (PHOBIUS); CYTOPLASMIC_DOMAIN (PHOBIUS); IPR013763 (SUPERFAMILY); IPR013763 (SUPERFAMILY); TMhelix (TMHMM); TMhelix (TMHMM); TMhelix (TMHMM)                                                                                                                      |
| 1393 | c35329_g1_i1_len_1544_path_1572_0_17_15_90_18_1204_2775_1205_1205_2776_1206_1543_2 | 457   | serine threonine-protein phosphatase 2a catalytic subunit alpha isoform | 514 | 0         | 97.70% | 0.176   | Coil (COILS); IPR006186 (PRINTS); IPR006186 (SMART); IPR029052 (G3DSA:3.60.21.GENE3D); IPR004843 (PFAM); PTHR11668 (PANTHER); PTHR11668:SF216 (PANTHER); IPR006186 (PROSITE_PATTERNS); IPR029052 (SUPERFAMILY)                                                                                                                                                                                                                                                                                                                                                 |
| 1394 | c35347_g1_i1_len_981_path_1034_0_980_2                                             | 17078 | der p 3 allergen                                                        | 327 | 4.14E-60  | 60.80% | 0.886Y  | IPR001314 (PRINTS); IPR001254 (SMART); G3DSA:2.40.10.10 (GENE3D); G3DSA:2.40.10.10 (GENE3D); IPR001254 (PFAM); PTHR24276 (PANTHER); IPR018114 (PROSITE_PATTERNS); IPR018114 (PROSITE_PATTERNS); SIGNAL_PEPTIDE (PHOBIUS); SIGNAL_PEPTIDE_H_REGION (PHOBIUS); SIGNAL_PEPTIDE_C_REGION (PHOBIUS); NON_CYTOPLASMIC_DOMAIN (PHOBIUS); SIGNAL_PEPTIDE_N_REGION (PHOBIUS); IPR001254 (PROSITE_PROFILES); SignalP-noTM (SIGNALP_EUK); IPR009003 (SUPERFAMILY)                                                                                                         |
| 1395 | c35351_g1_i1_len_967_path_105_0_966_3                                              | 290   | venom allergen 3-like                                                   | 323 | 1.49E-48  | 55.00% | 0.785 Y | IPR001283 (PRINTS); IPR002413 (PRINTS); IPR014044 (SMART); IPR014044 (PFAM); IPR014044 (G3DSA:3.40.33.GENE3D); IPR001283 (PANTHER); IPR018244 (PROSITE_PATTERNS); IPR018244 (PROSITE_PATTERNS); SIGNAL_PEPTIDE (PHOBIUS); SIGNAL_PEPTIDE_C_REGION (PHOBIUS); SIGNAL_PEPTIDE_H_REGION (PHOBIUS); SIGNAL_PEPTIDE_N_REGION (PHOBIUS); NON_CYTOPLASMIC_DOMAIN (PHOBIUS); SignalP-TM (SIGNALP_GRAM_POSITIVE); SignalP-noTM (SIGNALP_EUK); SignalP-noTM (SIGNALP_GRAM_NEGATIVE); IPR014044 (SUPERFAMILY); TMhelix (TMHMM)                                            |
| 1396 | c35354_g1_i1_len_1720_path_1_0_1719_0                                              | 272   | atpase family aaa domain-containing protein 1-b                         | 574 | 7.38E-165 | 77.60% | 0.121   | IPR003593 (SMART); IPR003959 (PFAM); G3DSA:1.10.8.60 (GENE3D); IPR027417 (G3DSA:3.40.50.GENE3D); PTHR23074 (PANTHER); PTHR23074:SF20 (PANTHER); IPR003960 (PROSITE_PATTERNS); TRANSMEMBRANE (PHOBIUS); TRANSMEMBRANE (PHOBIUS); TRANSMEMBRANE (PHOBIUS); NON_CYTOPLASMIC_DOMAIN (PHOBIUS); CYTOPLASMIC_DOMAIN (PHOBIUS); NON_CYTOPLASMIC_DOMAIN (PHOBIUS); CYTOPLASMIC_DOMAIN (PHOBIUS); IPR027417 (SUPERFAMILY)                                                                                                                                               |

|      |                                                                                     |     |                                                                 |     |           |        |       |                                                                                                                                                                                                                                                                                                                                                                                                                                                                                                                                                                                                                     |
|------|-------------------------------------------------------------------------------------|-----|-----------------------------------------------------------------|-----|-----------|--------|-------|---------------------------------------------------------------------------------------------------------------------------------------------------------------------------------------------------------------------------------------------------------------------------------------------------------------------------------------------------------------------------------------------------------------------------------------------------------------------------------------------------------------------------------------------------------------------------------------------------------------------|
| 1397 | c35361_g1_i1_len_1896_path_1_0_1170_1172_1171_1759_4856_1760_1895_3                 | 132 | sparc-related modular calcium-binding protein 1-like            | 632 | 8.24E-68  | 62.00% | 0.177 | IPR000716 (SMART); IPR000716 (PFAM); IPR000716 (G3DSA:4.10.800.GENE3D); IPR019577 (PFAM); IPR011992 (G3DSA:1.10.238.GENE3D); PTHR12352 (PANTHER); PTHR12352:SF3 (PANTHER); IPR000716 (PROSITE_PATTERNS); IPR018247 (PROSITE_PATTERNS); CYTOPLASMIC_DOMAIN (PHOBIUS); TRANSMEMBRANE (PHOBIUS); TRANSMEMBRANE (PHOBIUS); NON_CYTOPLASMIC_DOMAIN (PHOBIUS); NON_CYTOPLASMIC_DOMAIN (PHOBIUS); TRANSMEMBRANE (PHOBIUS); NON_CYTOPLASMIC_DOMAIN (PHOBIUS); TRANSMEMBRANE (PHOBIUS); CYTOPLASMIC_DOMAIN (PHOBIUS); IPR000716 (PROSITE_PROFILES); IPR000716 (SUPERFAMILY); SSF47473 (SUPERFAMILY); TMhelix (TMHMM)         |
| 1398 | c35361_g1_i2_len_2439_path_1_0_1170_1172_1171_1759_1761_1760_2438_3                 | 154 | sparc-related modular calcium-binding protein 1-like isoform x2 | 813 | 2.99E-119 | 56.20% | 0.107 | IPR000716 (SMART); IPR000716 (G3DSA:4.10.800.GENE3D); IPR019577 (PFAM); IPR011992 (G3DSA:1.10.238.GENE3D); IPR000716 (PFAM); PTHR12352:SF3 (PANTHER); PTHR12352 (PANTHER); IPR000716 (PROSITE_PATTERNS); IPR018247 (PROSITE_PATTERNS); IPR000716 (PROSITE_PATTERNS); IPR018247 (PROSITE_PATTERNS); TRANSMEMBRANE (PHOBIUS); TRANSMEMBRANE (PHOBIUS); NON_CYTOPLASMIC_DOMAIN (PHOBIUS); CYTOPLASMIC_DOMAIN (PHOBIUS); NON_CYTOPLASMIC_DOMAIN (PHOBIUS); IPR000716 (PROSITE_PROFILES); IPR000716 (PROSITE_PROFILES); SSF47473 (SUPERFAMILY); IPR000716 (SUPERFAMILY); SSF47473 (SUPERFAMILY); IPR000716 (SUPERFAMILY) |
| 1399 | c35366_g1_i1_len_545_path_1064_0_363_23_31_364_544_5                                | 53  | beta- -n-acetylgalactosaminyltransferase bre-4-like             | 181 | 8.23E-21  | 57.40% | 0.257 | IPR003859 (PRINTS); IPR029044 (G3DSA:3.90.550.GENE3D); IPR027791 (PFAM); PTHR19300:SF30 (PANTHER); IPR003859 (PANTHER); TRANSMEMBRANE (PHOBIUS); TRANSMEMBRANE (PHOBIUS); NON_CYTOPLASMIC_DOMAIN (PHOBIUS); NON_CYTOPLASMIC_DOMAIN (PHOBIUS); CYTOPLASMIC_DOMAIN (PHOBIUS); IPR029044 (SUPERFAMILY); TMhelix (TMHMM)                                                                                                                                                                                                                                                                                                |
| 1400 | c35366_g1_i2_len_1086_path_1064_0_363_1_428_364_550_1615_551_1085_3                 | 103 | beta- -n-acetylgalactosaminyltransferase bre-4-like             | 362 | 1.12E-47  | 56.80% | 0.13  | IPR003859 (PRINTS); IPR029044 (G3DSA:3.90.550.GENE3D); IPR027995 (PFAM); IPR027791 (PFAM); PTHR19300:SF30 (PANTHER); IPR003859 (PANTHER); TRANSMEMBRANE (PHOBIUS); CYTOPLASMIC_DOMAIN (PHOBIUS); TRANSMEMBRANE (PHOBIUS); NON_CYTOPLASMIC_DOMAIN (PHOBIUS); NON_CYTOPLASMIC_DOMAIN (PHOBIUS); IPR029044 (SUPERFAMILY); TMhelix (TMHMM); TMhelix (TMHMM)                                                                                                                                                                                                                                                             |
| 1401 | c35366_g1_i3_len_1665_path_1064_0_363_1_428_364_550_3108_551_1129_1615_1130_1_664_3 | 137 | beta- -n-acetylgalactosaminyltransferase bre-4                  | 555 | 4.96E-66  | 58.10% | 0.13  | IPR003859 (PRINTS); IPR029044 (G3DSA:3.90.550.GENE3D); IPR027791 (PFAM); IPR027995 (PFAM); IPR003859 (PANTHER); TRANSMEMBRANE (PHOBIUS); TRANSMEMBRANE (PHOBIUS); NON_CYTOPLASMIC_DOMAIN (PHOBIUS); CYTOPLASMIC_DOMAIN (PHOBIUS); NON_CYTOPLASMIC_DOMAIN (PHOBIUS); IPR029044 (SUPERFAMILY); TMhelix (TMHMM); TMhelix (TMHMM)                                                                                                                                                                                                                                                                                       |
| 1402 | c3538_g1_i1_len_700_path_1_0_74_76_75_6_99_5                                        | 15  | 5 -nucleotidase-like                                            | 233 | 4.71E-32  | 67.10% | 0.14  | IPR004843 (PFAM); IPR029052 (G3DSA:3.60.21.GENE3D); PTHR11575:SF21 (PANTHER); IPR006179 (PANTHER); IPR006146 (PROSITE_PATTERNS); NON_CYTOPLASMIC_DOMAIN (PHOBIUS); CYTOPLASMIC_DOMAIN (PHOBIUS); TRANSMEMBRANE (PHOBIUS); IPR029052 (SUPERFAMILY); TMhelix (TMHMM)                                                                                                                                                                                                                                                                                                                                                  |
| 1403 | c35392_g1_i1_len_1122_path_1150_0_675_1_824_676_696_1845_697_1121_1                 | 54  | neural ectodermal development factor imp-12                     | 374 | 1.88E-44  | 51.60% | 0.11  | IPR003598 (SMART); IPR003599 (SMART); IPR013783 (G3DSA:2.60.40.GENE3D); PF13895 (PFAM); IPR013783 (G3DSA:2.60.40.GENE3D); IPR013098 (PFAM); PTHR10489 (PANTHER); TRANSMEMBRANE (PHOBIUS); NON_CYTOPLASMIC_DOMAIN (PHOBIUS); CYTOPLASMIC_DOMAIN (PHOBIUS); IPR007110 (PROSITE_PROFILES); IPR007110 (PROSITE_PROFILES); SSF48726 (SUPERFAMILY); SSF48726 (SUPERFAMILY); TMhelix (TMHMM)                                                                                                                                                                                                                               |
| 1404 | c35397_g1_i1_len_2045_path_1_0_1287_760_7_1288_1309_1311_1310_2044_4                | 246 | receptor-type tyrosine-protein phosphatase kappa                | 682 | 1.10E-150 | 57.10% | 0.13  | Coil (COILS); IPR000242 (PRINTS); IPR003595 (SMART); IPR000242 (SMART); IPR000242 (PFAM); IPR029021 (G3DSA:3.90.190.GENE3D); IPR029021 (G3DSA:3.90.190.GENE3D); PTHR19134 (PANTHER); IPR016130 (PROSITE_PATTERNS); CYTOPLASMIC_DOMAIN (PHOBIUS); TRANSMEMBRANE (PHOBIUS); NON_CYTOPLASMIC_DOMAIN (PHOBIUS); IPR000387 (PROSITE_PROFILES); IPR000242 (PROSITE_PROFILES); IPR000387 (PROSITE_PROFILES); IPR000242 (PROSITE_PROFILES); IPR029021 (SUPERFAMILY); IPR029021 (SUPERFAMILY); TMhelix (TMHMM)                                                                                                               |



|      |                                                                                                |     |                                                                   |     |           |        |       |                                                                                                                                                                                                                                                                                                                                                                                                                                               |
|------|------------------------------------------------------------------------------------------------|-----|-------------------------------------------------------------------|-----|-----------|--------|-------|-----------------------------------------------------------------------------------------------------------------------------------------------------------------------------------------------------------------------------------------------------------------------------------------------------------------------------------------------------------------------------------------------------------------------------------------------|
| 1405 | c35397_g2_i1_len_1770_path_4045_0_1769_0                                                       | 107 | cre-let-805 protein                                               | 590 | 3.28E-18  | 42.20% | 0.176 | IPR003961 (SMART); IPR013783 (G3DSA:2.60.40.GENE3D); IPR022041 (PFAM); IPR013783 (G3DSA:2.60.40.GENE3D); IPR003961 (PROSITE_PROFILES); IPR003961 (PROSITE_PROFILES); IPR003961 (PROSITE_PROFILES); IPR003961 (SUPERFAMILY); IPR003961 (SUPERFAMILY)                                                                                                                                                                                           |
| 1406 | c3542_g1_i1_len_2351_path_1_0_2350_0                                                           | 238 | sortilin-related receptor-like                                    | 784 | 8.74E-12  | 43.50% | 0.121 | IPR002172 (PRINTS); IPR000998 (SMART); IPR002172 (SMART); IPR002172 (PFAM); IPR000998 (PFAM); IPR002172 (G3DSA:4.10.400.GENE3D); IPR002172 (G3DSA:4.10.400.GENE3D); PTHR23282 (PANTHER); PTHR23282:SF75 (PANTHER); IPR000998 (PROSITE_PROFILES); IPR000998 (PROSITE_PROFILES); IPR002172 (PROSITE_PROFILES); IPR002172 (PROSITE_PROFILES); IPR002172 (SUPERFAMILY); IPR013320 (SUPERFAMILY); IPR002172 (SUPERFAMILY); IPR013320 (SUPERFAMILY) |
| 1407 | c35485_g2_i1_len_1535_path_1759_0_1454_24_1455_1534_4                                          | 98  | protein o-linked-mannose beta- -n-acetylglucosaminyltransferase 1 | 512 | 0         | 84.10% | 0.111 | IPR004139 (PFAM); IPR029044 (G3DSA:3.90.550.GENE3D); IPR004139 (PANTHER); PTHR10468:SF4 (PANTHER); CYTOPLASMIC_DOMAIN (PHOBIUS); TRANSMEMBRANE (PHOBIUS); NON_CYTOPLASMIC_DOMAIN (PHOBIUS); IPR029044 (SUPERFAMILY); TMhelix (TMHMM)                                                                                                                                                                                                          |
| 1408 | c35485_g2_i2_len_1685_path_1759_0_1454_3211_1455_1604_24_1605_1684_4                           | 104 | protein o-linked-mannose beta- -n-acetylglucosaminyltransferase 1 | 562 | 0         | 84.10% | 0.112 | IPR004139 (PFAM); IPR029044 (G3DSA:3.90.550.GENE3D); PTHR10468:SF4 (PANTHER); IPR004139 (PANTHER); CYTOPLASMIC_DOMAIN (PHOBIUS); NON_CYTOPLASMIC_DOMAIN (PHOBIUS); TRANSMEMBRANE (PHOBIUS); IPR029044 (SUPERFAMILY); TMhelix (TMHMM)                                                                                                                                                                                                          |
| 1409 | c35534_g1_i1_len_712_path_886_0_532_141_6_533_581_74_582_711_2                                 | 39  | integrin alpha-8                                                  | 237 | 4.66E-42  | 55.10% | 0.141 | IPR000413 (PRINTS); IPR013519 (SMART); G3DSA:2.60.40.1460 (GENE3D); IPR013649 (PFAM); G3DSA:2.130.10.130 (GENE3D); IPR013517 (PFAM); PTHR23220 (PANTHER); IPR013519 (PROSITE_PROFILES); IPR013519 (PROSITE_PROFILES); SSF69179 (SUPERFAMILY); SSF69318 (SUPERFAMILY)                                                                                                                                                                          |
| 1410 | c35554_g1_i2_len_2114_path_481_0_1714_2_40_1715_2113_5                                         | 141 | protein                                                           | 704 | 2.42E-140 | 49.80% | 0.129 | IPR007074 (PFAM); IPR029044 (G3DSA:3.90.550.GENE3D); PTHR13627:SF24 (PANTHER); PTHR13627 (PANTHER); TRANSMEMBRANE (PHOBIUS); CYTOPLASMIC_DOMAIN (PHOBIUS); NON_CYTOPLASMIC_DOMAIN (PHOBIUS); IPR029044 (SUPERFAMILY); TMhelix (TMHMM)                                                                                                                                                                                                         |
| 1411 | c35602_g1_i1_len_630_path_608_0_629_5                                                          | 30  | spermatogenesis-associated protein 20                             | 210 | 2.62E-62  | 81.30% | 0.128 | IPR012336 (G3DSA:3.40.30.GENE3D); IPR004879 (PFAM); PTHR12145:SF11 (PANTHER); PTHR12145 (PANTHER); IPR012336 (SUPERFAMILY)                                                                                                                                                                                                                                                                                                                    |
| 1412 | c35602_g2_i1_len_2049_path_1215_0_119_1_335_120_2048_2                                         | 179 | spermatogenesis-associated protein 20                             | 683 | 0         | 71.30% | 0.11  | IPR024705 (PIRSF); IPR012341 (G3DSA:1.50.10.GENE3D); IPR004879 (PFAM); PTHR12145:SF11 (PANTHER); PTHR12145 (PANTHER); IPR008928 (SUPERFAMILY)                                                                                                                                                                                                                                                                                                 |
| 1413 | c35609_g1_i1_len_772_path_1617_0_683_23_01_684_727_2301_728_771_0                              | 26  | serine protease 45 isoform x2                                     | 258 | 2.57E-09  | 78.00% | 0.174 | G3DSA:2.40.10.10 (GENE3D); IPR001254 (PFAM); PTHR24265 (PANTHER); TRANSMEMBRANE (PHOBIUS); NON_CYTOPLASMIC_DOMAIN (PHOBIUS); TRANSMEMBRANE (PHOBIUS); CYTOPLASMIC_DOMAIN (PHOBIUS); CYTOPLASMIC_DOMAIN (PHOBIUS); IPR001254 (PROSITE_PROFILES); IPR009003 (SUPERFAMILY)                                                                                                                                                                       |
| 1414 | c35609_g2_i1_len_595_path_1103_0_245_13_49_246_256_788_257_594_4                               | 25  | urokinase-type plasminogen activator                              | 198 | 1.75E-46  | 56.10% | 0.127 | IPR001314 (PRINTS); IPR001254 (SMART); G3DSA:2.40.10.10 (GENE3D); IPR001254 (PFAM); G3DSA:2.40.10.10 (GENE3D); G3DSA:2.40.10.10 (GENE3D); PTHR24265 (PANTHER); IPR018114 (PROSITE_PATTERNS); IPR018114 (PROSITE_PATTERNS); IPR001254 (PROSITE_PROFILES); IPR009003 (SUPERFAMILY)                                                                                                                                                              |
| 1415 | c35609_g2_i2_len_501_path_1103_0_245_33_51_246_500_3                                           | 12  | urokinase-type plasminogen activator                              | 167 | 3.26E-36  | 56.30% | 0.161 | IPR001254 (SMART); G3DSA:2.40.10.10 (GENE3D); IPR001254 (PFAM); G3DSA:2.40.10.10 (GENE3D); PTHR24265 (PANTHER); IPR018114 (PROSITE_PATTERNS); IPR018114 (PROSITE_PATTERNS); IPR001254 (PROSITE_PROFILES); IPR009003 (SUPERFAMILY)                                                                                                                                                                                                             |
| 1416 | c35609_g2_i3_len_574_path_552_0_235_788_236_573_4                                              | 17  | trypsin-1- partial                                                | 191 | 7.30E-42  | 55.90% | 0.127 | IPR001314 (PRINTS); IPR001254 (SMART); G3DSA:2.40.10.10 (GENE3D); G3DSA:2.40.10.10 (GENE3D); IPR001254 (PFAM); PTHR24265 (PANTHER); IPR018114 (PROSITE_PATTERNS); IPR001254 (PROSITE_PROFILES); IPR009003 (SUPERFAMILY)                                                                                                                                                                                                                       |
| 1417 | c35635_g1_i1_len_470_path_1017_0_57_86_58_182_938_183_210_239_211_228_29_229_268_536_269_469_5 | 12  | ubiquitin isoform cra_e                                           | 156 | 9.77E-69  | 99.10% | 0.211 | IPR019956 (PRINTS); IPR000626 (SMART); IPR000626 (PFAM); G3DSA:3.10.20.90 (GENE3D); G3DSA:3.10.20.90 (GENE3D); PTHR10666 (PANTHER); IPR019954 (PROSITE_PATTERNS); IPR000626 (PROSITE_PROFILES); IPR000626 (PROSITE_PROFILES); IPR029071 (SUPERFAMILY); IPR029071 (SUPERFAMILY)                                                                                                                                                                |

|      |                                                                                               |     |                                                    |     |          |        |       |                                                                                                                                                                                                                                                                                                                                                                                                                                                                                                                                                                                 |
|------|-----------------------------------------------------------------------------------------------|-----|----------------------------------------------------|-----|----------|--------|-------|---------------------------------------------------------------------------------------------------------------------------------------------------------------------------------------------------------------------------------------------------------------------------------------------------------------------------------------------------------------------------------------------------------------------------------------------------------------------------------------------------------------------------------------------------------------------------------|
| 1418 | c35638_g1_i1_len_1896_path_1_0_22_24_23_1895_2                                                | 469 | methyltransferase-like protein 23                  | 632 | 3.82E-85 | 80.30% | 0.18  | IPR000582 (PRINTS); IPR002110 (SMART); IPR000504 (SMART); IPR012677 (G3DSA:3.30.70.GENE3D); IPR020683 (G3DSA:1.25.40.GENE3D); IPR000582 (PFAM); IPR000504 (PFAM); IPR014352 (G3DSA:1.20.80.GENE3D); IPR029063 (G3DSA:3.40.50.GENE3D); IPR019410 (PFAM); IPR020683 (PFAM); PTHR24119 (PANTHER); PTHR24119:SF0 (PANTHER); IPR000504 (PROSITE_PROFILES); IPR002110 (PROSITE_PROFILES); IPR000582 (PROSITE_PROFILES); IPR020683 (PROSITE_PROFILES); IPR000582 (SUPERFAMILY); IPR029063 (SUPERFAMILY); SSF54928 (SUPERFAMILY); IPR020683 (SUPERFAMILY)                               |
| 1419 | c35638_g1_i2_len_1974_path_1999_0_100_24_101_1973_2                                           | 491 | methyltransferase-like protein 23                  | 658 | 3.57E-93 | 76.80% | 0.109 | IPR000582 (PRINTS); IPR000504 (SMART); IPR002110 (SMART); IPR019410 (PFAM); IPR029063 (G3DSA:3.40.50.GENE3D); IPR012677 (G3DSA:3.30.70.GENE3D); IPR000504 (PFAM); IPR020683 (PFAM); IPR020683 (G3DSA:1.25.40.GENE3D); IPR000582 (PFAM); IPR014352 (G3DSA:1.20.80.GENE3D); PTHR24119 (PANTHER); PTHR24119:SF0 (PANTHER); IPR000504 (PROSITE_PROFILES); IPR002110 (PROSITE_PROFILES); IPR020683 (PROSITE_PROFILES); IPR002110 (PROSITE_PROFILES); IPR000582 (PROSITE_PROFILES); IPR020683 (SUPERFAMILY); IPR000582 (SUPERFAMILY); SSF54928 (SUPERFAMILY); IPR029063 (SUPERFAMILY) |
| 1420 | c35657_g1_i1_len_1077_path_157_0_884_1036_885_932_1036_933_980_1036_981_1028_1036_1029_1076_3 | 103 | low-density lipoprotein receptor-related protein 2 | 359 | 6.01E-24 | 58.10% | 0.096 | IPR002172 (PRINTS); IPR002172 (SMART); IPR002172 (G3DSA:4.10.400.GENE3D); IPR002172 (PFAM); PTHR10529 (PANTHER); IPR023415 (PROSITE_PATTERNS); CYTOPLASMIC_DOMAIN (PHOBIUS); TRANSMEMBRANE (PHOBIUS); NON_CYTOPLASMIC_DOMAIN (PHOBIUS); IPR002172 (PROSITE_PROFILES); IPR002172 (PROSITE_PROFILES); IPR002172 (PROSITE_PROFILES); SignalP-TM (SIGNALP_GRAM_POSITIVE); IPR002172 (SUPERFAMILY); IPR002172 (SUPERFAMILY); IPR002172 (SUPERFAMILY); TMhelix (TMHMM)                                                                                                                |
| 1421 | c35657_g1_i1_len_1077_path_157_0_884_1036_885_932_1036_933_980_1036_981_1028_1036_1029_1076_5 | 103 | ---NA---                                           | 359 |          |        | 0.106 | no IPS match                                                                                                                                                                                                                                                                                                                                                                                                                                                                                                                                                                    |
| 1422 | c35681_g1_i1_len_993_path_53_0_992_4                                                          | 102 | dipeptidyl peptidase 1 isoform x1                  | 331 | 1.15E-83 | 83.90% | 0.101 | IPR000668 (SMART); IPR000668 (PFAM); G3DSA:3.90.70.10 (GENE3D); G3DSA:2.40.50.170 (GENE3D); IPR013128 (PANTHER); PTHR12411:SF314 (PANTHER); IPR025661 (PROSITE_PATTERNS); IPR025660 (PROSITE_PATTERNS); NON_CYTOPLASMIC_DOMAIN (PHOBIUS); TRANSMEMBRANE (PHOBIUS); CYTOPLASMIC_DOMAIN (PHOBIUS); SSF54001 (SUPERFAMILY); TMhelix (TMHMM)                                                                                                                                                                                                                                        |
| 1423 | c35681_g2_i1_len_898_path_2964_0_897_2                                                        | 64  | cathepsin c                                        | 299 | 8.26E-96 | 66.30% | 0.253 | G3DSA:3.90.70.10 (GENE3D); IPR014882 (PFAM); IPR000668 (PFAM); IPR014882 (G3DSA:2.40.128.GENE3D); PTHR12411:SF314 (PANTHER); IPR013128 (PANTHER); IPR000169 (PROSITE_PATTERNS); NON_CYTOPLASMIC_DOMAIN (PHOBIUS); TRANSMEMBRANE (PHOBIUS); CYTOPLASMIC_DOMAIN (PHOBIUS); IPR014882 (SUPERFAMILY); SSF54001 (SUPERFAMILY); TMhelix (TMHMM)                                                                                                                                                                                                                                       |
| 1424 | c35695_g1_i1_len_1871_path_143_0_239_382_240_259_142_260_1748_1888_1749_1809_1888_1810_1870_0 | 153 | retinol dehydrogenase 13-like                      | 624 | 4.20E-89 | 66.70% | 0.179 | IPR002198 (PRINTS); IPR002347 (PRINTS); IPR016040 (G3DSA:3.40.50.GENE3D); IPR002198 (PFAM); PTHR24320 (PANTHER); IPR020904 (PROSITE_PATTERNS); TRANSMEMBRANE (PHOBIUS); TRANSMEMBRANE (PHOBIUS); NON_CYTOPLASMIC_DOMAIN (PHOBIUS); CYTOPLASMIC_DOMAIN (PHOBIUS); NON_CYTOPLASMIC_DOMAIN (PHOBIUS); SSF51735 (SUPERFAMILY); TMhelix (TMHMM); TMhelix (TMHMM)                                                                                                                                                                                                                     |

|      |                                                                                                        |      |                                                                                                              |      |           |        |         |                                                                                                                                                                                                                                                                                                                                                                                                                                                                                                                                                                                                                                                                                                                                                                                                      |
|------|--------------------------------------------------------------------------------------------------------|------|--------------------------------------------------------------------------------------------------------------|------|-----------|--------|---------|------------------------------------------------------------------------------------------------------------------------------------------------------------------------------------------------------------------------------------------------------------------------------------------------------------------------------------------------------------------------------------------------------------------------------------------------------------------------------------------------------------------------------------------------------------------------------------------------------------------------------------------------------------------------------------------------------------------------------------------------------------------------------------------------------|
| 1425 | c35719_g1_i1_len_3237_path_105_0_251_35_7_252_3236_5                                                   | 355  | serine threonine-protein kinase pim-3                                                                        | 1079 | 2.94E-128 | 76.90% | 0.115   | IPR002290 (SMART); G3DSA:1.10.510.10 (GENE3D); IPR000719 (PFAM); G3DSA:3.30.200.20 (GENE3D); PTHR22984:SF1 (PANTHER); PTHR22984 (PANTHER); IPR017441 (PROSITE_PATTERNS); IPR008271 (PROSITE_PATTERNS); NON_CYTOPLASMIC_DOMAIN (PHOBIUS); TRANSMEMBRANE (PHOBIUS); CYTOPLASMIC_DOMAIN (PHOBIUS); TRANSMEMBRANE (PHOBIUS); TRANSMEMBRANE (PHOBIUS); TRANSMEMBRANE (PHOBIUS); CYTOPLASMIC_DOMAIN (PHOBIUS); TRANSMEMBRANE (PHOBIUS); NON_CYTOPLASMIC_DOMAIN (PHOBIUS); TRANSMEMBRANE (PHOBIUS); CYTOPLASMIC_DOMAIN (PHOBIUS); CYTOPLASMIC_DOMAIN (PHOBIUS); NON_CYTOPLASMIC_DOMAIN (PHOBIUS); IPR000719 (PROSITE_PROFILES); IPR011009 (SUPERFAMILY); TMhelix (TMHMM); TMhelix (TMHMM); TMhelix (TMHMM); TMhelix (TMHMM); TMhelix (TMHMM); TMhelix (TMHMM)                                               |
| 1426 | c35733_g1_i1_len_2862_path_157_0_2861_5                                                                | 455  | leucine-rich repeat and immunoglobulin-like domain-containing nogo receptor-interacting protein 3 isoform x2 | 954  | 1.16E-136 | 64.70% | 0.117   | Coil (COILS); IPR003598 (SMART); IPR003599 (SMART); IPR013783 (G3DSA:2.60.40.GENE3D); G3DSA:3.80.10.10 (GENE3D); IPR013098 (PFAM); PTHR24373:SF38 (PANTHER); PTHR24373 (PANTHER); CYTOPLASMIC_DOMAIN (PHOBIUS); NON_CYTOPLASMIC_DOMAIN (PHOBIUS); CYTOPLASMIC_DOMAIN (PHOBIUS); TRANSMEMBRANE (PHOBIUS); TRANSMEMBRANE (PHOBIUS); IPR007110 (PROSITE_PROFILES); IPR001611 (PROSITE_PROFILES); SSF52058 (SUPERFAMILY); SSF48726 (SUPERFAMILY); TMhelix (TMHMM); TMhelix (TMHMM)                                                                                                                                                                                                                                                                                                                       |
| 1427 | c35769_g1_i1_len_1347_path_185_0_899_10_80_900_917_80_918_1346_5                                       | 770  | projectin short variant                                                                                      | 449  | 5.01E-40  | 49.60% | 0.101   | IPR003599 (SMART); IPR003598 (SMART); IPR013783 (G3DSA:2.60.40.GENE3D); IPR013098 (PFAM); IPR013783 (G3DSA:2.60.40.GENE3D); IPR013783 (G3DSA:2.60.40.GENE3D); PTHR19897 (PANTHER); TRANSMEMBRANE (PHOBIUS); CYTOPLASMIC_DOMAIN (PHOBIUS); NON_CYTOPLASMIC_DOMAIN (PHOBIUS); IPR007110 (PROSITE_PROFILES); IPR007110 (PROSITE_PROFILES); SSF48726 (SUPERFAMILY); SSF48726 (SUPERFAMILY); SSF48726 (SUPERFAMILY); TMhelix (TMHMM)                                                                                                                                                                                                                                                                                                                                                                      |
| 1428 | c35775_g1_i1_len_797_path_207_0_796_3                                                                  | 6163 | epididymal secretory protein e1                                                                              | 266  | 1.32E-28  | 59.00% | 0.111   | IPR003172 (SMART); IPR003172 (G3DSA:2.60.40.GENE3D); IPR003172 (PFAM); PTHR11306 (PANTHER); IPR014756 (SUPERFAMILY)                                                                                                                                                                                                                                                                                                                                                                                                                                                                                                                                                                                                                                                                                  |
| 1429 | c35843_g1_i1_len_697_path_1007_0_29_103_7_30_34_1042_35_498_1505_499_565_1571_566_597_1505_598_664_1_2 | 284  | thioredoxin 1                                                                                                | 232  | 4.53E-50  | 83.30% | 0.375 Y | PR00421 (PRINTS); IPR013766 (PFAM); IPR012336 (G3DSA:3.40.30.GENE3D); IPR005746 (TIGRFAM); IPR005746 (PANTHER); IPR017937 (PROSITE_PATTERNS); NON_CYTOPLASMIC_DOMAIN (PHOBIUS); SIGNAL_PEPTIDE_H_REGION (PHOBIUS); SIGNAL_PEPTIDE_C_REGION (PHOBIUS); SIGNAL_PEPTIDE (PHOBIUS); SIGNAL_PEPTIDE_N_REGION (PHOBIUS); IPR012336 (PROSITE_PROFILES); IPR012336 (SUPERFAMILY)                                                                                                                                                                                                                                                                                                                                                                                                                             |
| 1430 | c35892_g1_i1_len_1290_path_157_0_21_179_22_1289_0                                                      | 238  | leucine-rich repeat-containing protein partial                                                               | 430  | 4.69E-53  | 47.20% | 0.228   | IPR003591 (SMART); IPR000483 (SMART); IPR026906 (PFAM); G3DSA:3.80.10.10 (GENE3D); IPR001611 (PFAM); G3DSA:3.80.10.10 (GENE3D); PTHR24373 (PANTHER); PTHR24373:SF100 (PANTHER); IPR001611 (PROSITE_PROFILES); SSF52058 (SUPERFAMILY)                                                                                                                                                                                                                                                                                                                                                                             |
| 1431 | c35892_g1_i2_len_1974_path_2173_0_229_1_79_230_1497_3667_1498_1524_104_1525_1_973_1                    | 408  | leucine-rich repeat-containing protein partial                                                               | 658  | 2.35E-51  | 48.80% | 0.117   | IPR000483 (SMART); IPR003591 (SMART); IPR001611 (PFAM); G3DSA:3.80.10.10 (GENE3D); G3DSA:3.80.10.10 (GENE3D); IPR026906 (PFAM); PTHR24373:SF100 (PANTHER); PTHR24373 (PANTHER); CYTOPLASMIC_DOMAIN (PHOBIUS); TRANSMEMBRANE (PHOBIUS); TRANSMEMBRANE (PHOBIUS); NON_CYTOPLASMIC_DOMAIN (PHOBIUS); TRANSMEMBRANE (PHOBIUS); TRANSMEMBRANE (PHOBIUS); NON_CYTOPLASMIC_DOMAIN (PHOBIUS); NON_CYTOPLASMIC_DOMAIN (PHOBIUS); CYTOPLASMIC_DOMAIN (PHOBIUS); NON_CYTOPLASMIC_DOMAIN (PHOBIUS); IPR001611 (PROSITE_PROFILES); SSF52058 (SUPERFAMILY); TMhelix (TMHMM); TMhelix (TMHMM); TMhelix (TMHMM); TMhelix (TMHMM) |

|      |                                                                                     |     |                                               |     |           |        |        |                                                                                                                                                                                                                                                                                                                                                                                                                                                                                                                                                                                                                                                                                                                                                                                                     |
|------|-------------------------------------------------------------------------------------|-----|-----------------------------------------------|-----|-----------|--------|--------|-----------------------------------------------------------------------------------------------------------------------------------------------------------------------------------------------------------------------------------------------------------------------------------------------------------------------------------------------------------------------------------------------------------------------------------------------------------------------------------------------------------------------------------------------------------------------------------------------------------------------------------------------------------------------------------------------------------------------------------------------------------------------------------------------------|
| 1432 | c35900_g3_i1_len_2217_path_3879_0_2216_2                                            | 144 | midnolin-b-like isoform x1                    | 739 | 3.15E-59  | 68.10% | 0.338  | PTHR23010 (PANTHER); PTHR23010:SF0 (PANTHER)                                                                                                                                                                                                                                                                                                                                                                                                                                                                                                                                                                                                                                                                                                                                                        |
| 1433 | c35952_g2_i1_len_1610_path_433_0_1003_1_436_1004_1408_272_1409_1409_432_1410_1609_3 | 94  | multiple inositol polyphosphate phosphatase 1 | 537 | 3.48E-119 | 59.40% | 0.636Y | IPR000560 (PFAM); IPR029033 (G3DSA:3.40.50.GENE3D); PTHR20963:SF8 (PANTHER); PTHR20963 (PANTHER); TRANSMEMBRANE (PHOBIUS); CYTOPLASMIC_DOMAIN (PHOBIUS); SIGNAL_PEPTIDE_N_REGION (PHOBIUS); SIGNAL_PEPTIDE_C_REGION (PHOBIUS); SIGNAL_PEPTIDE (PHOBIUS); SIGNAL_PEPTIDE_H_REGION (PHOBIUS); NON_CYTOPLASMIC_DOMAIN (PHOBIUS); TRANSMEMBRANE (PHOBIUS); NON_CYTOPLASMIC_DOMAIN (PHOBIUS); SignalP-TM (SIGNALP_GRAM_POSITIVE); SignalP-noTM (SIGNALP_GRAM_NEGATIVE); SignalP-noTM (SIGNALP_EUK); IPR029033 (SUPERFAMILY)                                                                                                                                                                                                                                                                              |
| 1434 | c35952_g2_i3_len_1205_path_433_0_1003_2_72_1004_1004_432_1005_1204_3                | 78  | multiple inositol polyphosphate phosphatase 1 | 402 | 1.75E-89  | 59.70% | 0.628Y | IPR000560 (PFAM); IPR029033 (G3DSA:3.40.50.GENE3D); PTHR20963 (PANTHER); PTHR20963:SF8 (PANTHER); SIGNAL_PEPTIDE_C_REGION (PHOBIUS); SIGNAL_PEPTIDE_N_REGION (PHOBIUS); SIGNAL_PEPTIDE_H_REGION (PHOBIUS); SIGNAL_PEPTIDE (PHOBIUS); NON_CYTOPLASMIC_DOMAIN (PHOBIUS); SignalP-noTM (SIGNALP_EUK); IPR029033 (SUPERFAMILY)                                                                                                                                                                                                                                                                                                                                                                                                                                                                          |
| 1435 | c35962_g1_i1_len_1860_path_2261_0_939_3_199_940_975_3235_976_1121_245_1122_18_59_5  | 341 | protein shifted isoform x1                    | 620 | 0         | 81.40% | 0.143  | IPR013309 (PRINTS); IPR003306 (SMART); IPR000742 (SMART); IPR013032 (PFAM); IPR003306 (PFAM); G3DSA:2.10.25.10 (GENE3D); G3DSA:2.10.25.10 (GENE3D); PTHR24838 (PANTHER); PTHR24838:SF276 (PANTHER); IPR013032 (PROSITE_PATTERNS); TRANSMEMBRANE (PHOBIUS); NON_CYTOPLASMIC_DOMAIN (PHOBIUS); CYTOPLASMIC_DOMAIN (PHOBIUS); IPR003306 (PRODOM); IPR000742 (PROSITE_PROFILES); IPR000742 (PROSITE_PROFILES); IPR000742 (PROSITE_PROFILES); IPR003306 (PROSITE_PROFILES); IPR000742 (PROSITE_PROFILES); SSF57196 (SUPERFAMILY); SSF57196 (SUPERFAMILY) |
| 1436 | c35962_g1_i2_len_1824_path_2261_0_939_3_235_940_1085_245_1086_1823_5                | 330 | wnt inhibitory factor 1                       | 608 | 0         | 83.00% | 0.143  | IPR013309 (PRINTS); IPR003306 (SMART); IPR000742 (SMART); IPR003306 (PFAM); IPR013032 (PFAM); G3DSA:2.170.300.10 (GENE3D); PTHR24838 (PANTHER); PTHR24838:SF276 (PANTHER); IPR013032 (PROSITE_PATTERNS); TRANSMEMBRANE (PHOBIUS); CYTOPLASMIC_DOMAIN (PHOBIUS); NON_CYTOPLASMIC_DOMAIN (PHOBIUS); IPR003306 (PRODOM); IPR000742 (PROSITE_PROFILES); IPR000742 (PROSITE_PROFILES); IPR000742 (PROSITE_PROFILES); IPR003306 (PROSITE_PROFILES); IPR000742 (PROSITE_PROFILES); IPR000742 (PROSITE_PROFILES); SSF57196 (SUPERFAMILY); SSF57196 (SUPERFAMILY)                          |
| 1437 | c35962_g1_i3_len_918_path_65_0_179_245_180_917_5                                    | 108 | protein shifted                               | 306 | 1.83E-47  | 87.30% | 0.143  | IPR003306 (SMART); IPR003306 (PFAM); PTHR24838:SF276 (PANTHER); PTHR24838 (PANTHER); TRANSMEMBRANE (PHOBIUS); CYTOPLASMIC_DOMAIN (PHOBIUS); NON_CYTOPLASMIC_DOMAIN (PHOBIUS); IPR003306 (PRODOM); IPR003306 (PROSITE_PROFILES)                                                                                                                                                                                                                                                                                                                                                                                                                                                                                                                                                                      |
| 1438 | c36001_g1_i1_len_1266_path_53_0_963_244_0_964_1265_3                                | 257 | epidermal retinol dehydrogenase 2-like        | 422 | 1.01E-75  | 70.20% | 0.216  | IPR002198 (PRINTS); IPR002347 (PRINTS); IPR002198 (PFAM); IPR016040 (G3DSA:3.40.50.GENE3D); PTHR24316:SF289 (PANTHER); PTHR24316 (PANTHER); SSF51735 (SUPERFAMILY)                                                                                                                                                                                                                                                                                                                                                                                                                                                                                                                                                                                                                                  |
| 1439 | c36001_g1_i2_len_1345_path_53_0_963_101_7_964_1344_4                                | 334 | epidermal retinol dehydrogenase 2             | 448 | 1.90E-105 | 71.30% | 0.215  | IPR002347 (PRINTS); IPR002198 (PRINTS); IPR016040 (G3DSA:3.40.50.GENE3D); IPR002198 (PFAM); PTHR24316:SF289 (PANTHER); PTHR24316 (PANTHER); NON_CYTOPLASMIC_DOMAIN (PHOBIUS); TRANSMEMBRANE (PHOBIUS); CYTOPLASMIC_DOMAIN (PHOBIUS); SSF51735 (SUPERFAMILY); TMhelix (TMHMM)                                                                                                                                                                                                                                                                                                                                                                                                                                                                                                                        |

|      |                                                                           |     |                                                                                                                                                                            |      |           |        |       |                                                                                                                                                                                                                                                                                                                                                                                                                                                                                                                                                                                                                                                                                                                                                                                                                                                                                                                                                                                                                                                                                                            |
|------|---------------------------------------------------------------------------|-----|----------------------------------------------------------------------------------------------------------------------------------------------------------------------------|------|-----------|--------|-------|------------------------------------------------------------------------------------------------------------------------------------------------------------------------------------------------------------------------------------------------------------------------------------------------------------------------------------------------------------------------------------------------------------------------------------------------------------------------------------------------------------------------------------------------------------------------------------------------------------------------------------------------------------------------------------------------------------------------------------------------------------------------------------------------------------------------------------------------------------------------------------------------------------------------------------------------------------------------------------------------------------------------------------------------------------------------------------------------------------|
| 1440 | c36017_g1_i1_len_4740_path_4868_0_4739_2                                  | 562 | sodium calcium exchanger 3-like isoform x1                                                                                                                                 | 1580 | 0         | 76.90% | 0.123 | IPR004836 (PRINTS); IPR003644 (SMART); IPR004837 (PFAM); IPR003644 (PFAM); IPR004836 (TIGRFAM); PTHR11878 (PANTHER); TRANSMEMBRANE (PHOBIUS); CYTOPLASMIC_DOMAIN (PHOBIUS); TRANSMEMBRANE (PHOBIUS); TRANSMEMBRANE (PHOBIUS); NON_CYTOPLASMIC_DOMAIN (PHOBIUS); TRANSMEMBRANE (PHOBIUS); NON_CYTOPLASMIC_DOMAIN (PHOBIUS); NON_CYTOPLASMIC_DOMAIN (PHOBIUS); CYTOPLASMIC_DOMAIN (PHOBIUS); CYTOPLASMIC_DOMAIN (PHOBIUS); CYTOPLASMIC_DOMAIN (PHOBIUS); NON_CYTOPLASMIC_DOMAIN (PHOBIUS); TRANSMEMBRANE (PHOBIUS); CYTOPLASMIC_DOMAIN (PHOBIUS); TRANSMEMBRANE (PHOBIUS); TRANSMEMBRANE (PHOBIUS); TRANSMEMBRANE (PHOBIUS); TRANSMEMBRANE (PHOBIUS); CYTOPLASMIC_DOMAIN (PHOBIUS); NON_CYTOPLASMIC_DOMAIN (PHOBIUS); CYTOPLASMIC_DOMAIN (PHOBIUS); NON_CYTOPLASMIC_DOMAIN (PHOBIUS); TRANSMEMBRANE (PHOBIUS); TRANSMEMBRANE (PHOBIUS); TRANSMEMBRANE (PHOBIUS); SSF141072 (SUPERFAMILY); SSF141072 (SUPERFAMILY); TMhelix (TMHMM); TMhelix (TMHMM) |
| 1441 | c36049_g1_i1_len_1864_path_105_0_1863_5                                   | 186 | ankyrin sam and basic leucine zipper domain-containing protein 1-like                                                                                                      | 621  | 1.49E-130 | 61.10% | 0.099 | IPR002110 (SMART); IPR001660 (SMART); IPR021129 (PFAM); IPR013761 (G3DSA:1.10.150.GENE3D); IPR020683 (G3DSA:1.25.40.GENE3D); IPR020683 (PFAM); PTHR24157 (PANTHER); IPR002110 (PROSITE_PROFILES); IPR001660 (PROSITE_PROFILES); IPR002110 (PROSITE_PROFILES); IPR020683 (PROSITE_PROFILES); IPR020683 (SUPERFAMILY); IPR013761 (SUPERFAMILY)                                                                                                                                                                                                                                                                                                                                                                                                                                                                                                                                                                                                                                                                                                                                                               |
| 1442 | c36090_g1_i1_len_625_path_153_0_301_455_302_393_546_394_396_127_397_624_3 | 81  | bola-like protein 3                                                                                                                                                        | 209  | 4.69E-32  | 75.40% | 0.183 | IPR002634 (PFAM); G3DSA:3.30.70.1500 (GENE3D); PTHR12735:SF4 (PANTHER); PTHR12735 (PANTHER); IPR002634 (SUPERFAMILY)                                                                                                                                                                                                                                                                                                                                                                                                                                                                                                                                                                                                                                                                                                                                                                                                                                                                                                                                                                                       |
| 1443 | c36112_g1_i1_len_2451_path_105_0_2450_4                                   | 258 | cytochrome p450 partial                                                                                                                                                    | 817  | 1.24E-108 | 58.80% | 0.122 | IPR001128 (PRINTS); IPR002401 (PRINTS); IPR001128 (G3DSA:1.10.630.GENE3D); IPR001128 (PFAM); PTHR24302:SF7 (PANTHER); PTHR24302 (PANTHER); IPR017972 (PROSITE_PATTERNS); TRANSMEMBRANE (PHOBIUS); CYTOPLASMIC_DOMAIN (PHOBIUS); NON_CYTOPLASMIC_DOMAIN (PHOBIUS); NON_CYTOPLASMIC_DOMAIN (PHOBIUS); TRANSMEMBRANE (PHOBIUS); CYTOPLASMIC_DOMAIN (PHOBIUS); TRANSMEMBRANE (PHOBIUS); IPR001128 (SUPERFAMILY); TMhelix (TMHMM); TMhelix (TMHMM); TMhelix (TMHMM)                                                                                                                                                                                                                                                                                                                                                                                                                                                                                                                                                                                                                                             |
| 1444 | c36123_g1_i1_len_662_path_3323_0_113_89_7_114_174_958_175_661_1           | 51  | zinc finger protein 271 (zinc finger protein 7) (zinc finger protein znfphe133) (epstein-barr virus-induced zinc finger protein) (znf-eb) (ct-zfp48) (zinc finger protein) | 221  | 2.77E-21  | 53.40% | 0.099 | IPR015880 (SMART); PF13465 (PFAM); IPR013087 (G3DSA:3.30.160.GENE3D); IPR013087 (G3DSA:3.30.160.GENE3D); PF13894 (PFAM); PTHR24409:SF13 (PANTHER); PTHR24409 (PANTHER); IPR007087 (PROSITE_PATTERNS); IPR007087 (PROSITE_PATTERNS); IPR007087 (PROSITE_PATTERNS); IPR007087 (PROSITE_PATTERNS); IPR007087 (PROSITE_PROFILES); IPR007087 (PROSITE_PROFILES); IPR007087 (PROSITE_PROFILES); IPR007087 (PROSITE_PROFILES); SSF57667 (SUPERFAMILY); SSF57667 (SUPERFAMILY)                                                                                                                                                                                                                                                                                                                                                                                                                                                                                                                                                                                                                                     |
| 1445 | c36129_g1_i1_len_2154_path_3323_0_1746_5070_1747_1777_402_1778_2153_1     | 300 | venom carboxylesterase-6 isoform x2                                                                                                                                        | 718  | 9.88E-138 | 58.20% | 0.144 | IPR002018 (PFAM); IPR029058 (G3DSA:3.40.50.GENE3D); PTHR11559 (PANTHER); IPR019819 (PROSITE_PATTERNS); IPR019826 (PROSITE_PATTERNS); NON_CYTOPLASMIC_DOMAIN (PHOBIUS); TRANSMEMBRANE (PHOBIUS); CYTOPLASMIC_DOMAIN (PHOBIUS); TRANSMEMBRANE (PHOBIUS); NON_CYTOPLASMIC_DOMAIN (PHOBIUS); IPR029058 (SUPERFAMILY)                                                                                                                                                                                                                                                                                                                                                                                                                                                                                                                                                                                                                                                                                                                                                                                           |
| 1446 | c36129_g2_i1_len_1196_path_6342_0_604_5_070_605_635_5100_636_1195_2       | 81  | venom carboxylesterase-6                                                                                                                                                   | 398  | 4.12E-40  | 53.20% | 0.101 | IPR029058 (G3DSA:3.40.50.GENE3D); IPR002018 (PFAM); PTHR11559 (PANTHER); IPR029058 (SUPERFAMILY)                                                                                                                                                                                                                                                                                                                                                                                                                                                                                                                                                                                                                                                                                                                                                                                                                                                                                                                                                                                                           |
| 1447 | c36146_g1_i1_len_3784_path_557_0_513_53_1_514_3783_3                      | 524 | uncharacterized family 31 glucosidase k1a1161 isoform x5                                                                                                                   | 1262 | 0         | 62.10% | 0.122 | IPR000322 (PFAM); IPR013785 (G3DSA:3.20.20.GENE3D); PTHR22762 (PANTHER); PTHR22762:SF73 (PANTHER); TRANSMEMBRANE (PHOBIUS); NON_CYTOPLASMIC_DOMAIN (PHOBIUS); CYTOPLASMIC_DOMAIN (PHOBIUS); IPR017853 (SUPERFAMILY); SSF51011 (SUPERFAMILY); TMhelix (TMHMM)                                                                                                                                                                                                                                                                                                                                                                                                                                                                                                                                                                                                                                                                                                                                                                                                                                               |



|      |                                                                                       |       |                                                   |      |           |        |         |                                                                                                                                                                                                                                                                                                                                                                                                                                                                                                                                                                                                                                                                                                                                                                                                                                        |
|------|---------------------------------------------------------------------------------------|-------|---------------------------------------------------|------|-----------|--------|---------|----------------------------------------------------------------------------------------------------------------------------------------------------------------------------------------------------------------------------------------------------------------------------------------------------------------------------------------------------------------------------------------------------------------------------------------------------------------------------------------------------------------------------------------------------------------------------------------------------------------------------------------------------------------------------------------------------------------------------------------------------------------------------------------------------------------------------------------|
| 1448 | c36169_g1_i1_len_1422_path_53_0_770_824_771_783_2956_784_1421_0                       | 16211 | trypsin-like serine proteinase 2                  | 474  | 9.15E-61  | 56.70% | 0.103   | IPR001314 (PRINTS); IPR001254 (SMART); IPR001254 (PFAM); G3DSA:2.40.10.10 (GENE3D); G3DSA:2.40.10.10 (GENE3D); G3DSA:2.40.10.10 (GENE3D); PTHR24276 (PANTHER); IPR018114 (PROSITE_PATTERNS); IPR018114 (PROSITE_PATTERNS); CYTOPLASMIC_DOMAIN (PHOBIUS); CYTOPLASMIC_DOMAIN (PHOBIUS); TRANSMEMBRANE (PHOBIUS); NON_CYTOPLASMIC_DOMAIN (PHOBIUS); IPR001254 (PROSITE_PROFILES); IPR009003 (SUPERFAMILY); TMhelix (TMHMM); TMhelix (TMHMM)                                                                                                                                                                                                                                                                                                                                                                                              |
| 1452 | c3617_g1_i1_len_1141_path_1144_0_1140_0                                               | 79    | dehydrogenase reductase sdr family member 11-like | 381  | 8.71E-105 | 74.50% | 0.285   | IPR002347 (PRINTS); IPR002198 (PRINTS); IPR016040 (G3DSA:3.40.50.GENE3D); IPR002198 (PFAM); PTHR24322:SF310 (PANTHER); PTHR24322 (PANTHER); SSF51735 (SUPERFAMILY)                                                                                                                                                                                                                                                                                                                                                                                                                                                                                                                                                                                                                                                                     |
| 1449 | c36173_g1_i1_len_2071_path_2099_0_2070_0                                              | 148   | glutamate-rich wd repeat-containing protein 1     | 691  | 0         | 72.40% | 0.107   | IPR020472 (PRINTS); IPR001680 (SMART); IPR001680 (PFAM); IPR015943 (G3DSA:2.130.10.GENE3D); IPR022052 (PFAM); PTHR22850:SF6 (PANTHER); PTHR22850 (PANTHER); IPR019775 (PROSITE_PATTERNS); NON_CYTOPLASMIC_DOMAIN (PHOBIUS); TRANSMEMBRANE (PHOBIUS); TRANSMEMBRANE (PHOBIUS); CYTOPLASMIC_DOMAIN (PHOBIUS); NON_CYTOPLASMIC_DOMAIN (PHOBIUS); IPR001680 (PROSITE_PROFILES); IPR001680 (PROSITE_PROFILES); IPR017986 (PROSITE_PROFILES); IPR001680 (PROSITE_PROFILES); IPR017986 (SUPERFAMILY)                                                                                                                                                                                                                                                                                                                                          |
| 1450 | c36178_g1_i2_len_1592_path_211_0_644_85_6_645_1396_4619_1397_1591_2                   | 114   | tolloid-like protein 2 isoform x2                 | 530  | 0         | 83.50% | 0.099   | IPR000742 (SMART); IPR000859 (SMART); IPR001881 (SMART); IPR000859 (G3DSA:2.60.120.GENE3D); PF14670 (PFAM); IPR000859 (PFAM); IPR015446 (PIRSF); IPR001881 (PFAM); G3DSA:2.10.25.10 (GENE3D); IPR000859 (G3DSA:2.60.120.GENE3D); G3DSA:2.10.25.10 (GENE3D); PTHR10127 (PANTHER); PTHR10127:SF304 (PANTHER); IPR000152 (PROSITE_PATTERNS); IPR018097 (PROSITE_PATTERNS); IPR018097 (PROSITE_PATTERNS); IPR013032 (PROSITE_PATTERNS); IPR013032 (PROSITE_PATTERNS); IPR000152 (PROSITE_PATTERNS); IPR000742 (PROSITE_PROFILES); IPR000859 (PROSITE_PROFILES); IPR000859 (PROSITE_PROFILES); IPR000859 (PROSITE_PROFILES); IPR000859 (PROSITE_PROFILES); IPR000742 (PROSITE_PROFILES); SSF57196 (SUPERFAMILY); IPR000859 (SUPERFAMILY); SSF57196 (SUPERFAMILY); IPR000859 (SUPERFAMILY); IPR000859 (SUPERFAMILY); IPR000859 (SUPERFAMILY) |
| 1451 | c36178_g1_i3_len_2119_path_211_0_644_85_6_645_1396_1608_1397_1950_210_1951_2_118_2    | 146   | tolloid-like protein 2 isoform x2                 | 706  | 0         | 82.60% | 0.099   | IPR001881 (SMART); IPR000859 (SMART); IPR000742 (SMART); IPR001881 (PFAM); IPR000859 (G3DSA:2.60.120.GENE3D); G3DSA:2.10.25.10 (GENE3D); IPR000859 (G3DSA:2.60.120.GENE3D); PF14670 (PFAM); G3DSA:2.10.25.10 (GENE3D); IPR000859 (PFAM); PTHR10127 (PANTHER); PTHR10127:SF304 (PANTHER); IPR018097 (PROSITE_PATTERNS); IPR013032 (PROSITE_PATTERNS); IPR018097 (PROSITE_PATTERNS); IPR000152 (PROSITE_PATTERNS); IPR000152 (PROSITE_PATTERNS); IPR013032 (PROSITE_PATTERNS); IPR000859 (PROSITE_PROFILES); IPR000859 (PROSITE_PROFILES); IPR000859 (PROSITE_PROFILES); IPR000859 (PROSITE_PROFILES); IPR000742 (PROSITE_PROFILES); IPR000742 (PROSITE_PROFILES); SSF57196 (SUPERFAMILY); IPR000859 (SUPERFAMILY); IPR000859 (SUPERFAMILY); IPR000859 (SUPERFAMILY); SSF57196 (SUPERFAMILY); IPR000859 (SUPERFAMILY)                    |
| 1453 | c36194_g1_i1_len_958_path_1_0_154_156_1_55_178_180_179_249_251_250_252_254_25_3_957_2 | 754   | aael003561- partial                               | 319  | 9.72E-26  | 49.90% | 0.641 Y | IPR001211 (PRINTS); IPR016090 (SMART); IPR016090 (G3DSA:1.20.90.GENE3D); IPR016090 (PFAM); IPR001211 (PANTHER); IPR013090 (PROSITE_PATTERNS); NON_CYTOPLASMIC_DOMAIN (PHOBIUS); SIGNAL_PEPTIDE (PHOBIUS); SIGNAL_PEPTIDE_H_REGION (PHOBIUS); SIGNAL_PEPTIDE_N_REGION (PHOBIUS); SIGNAL_PEPTIDE_C_REGION (PHOBIUS); SignalP-noTM (SIGNALP_EUK); IPR016090 (SUPERFAMILY)                                                                                                                                                                                                                                                                                                                                                                                                                                                                 |
| 1454 | c36210_g1_i1_len_4027_path_53_0_671_812_2_672_692_725_693_4026_1                      | 1271  | coatomer subunit alpha                            | 1342 | 0         | 87.60% | 0.128   | IPR020472 (PRINTS); IPR001680 (SMART); IPR016391 (PIRSF); IPR010714 (PFAM); IPR006692 (PFAM); IPR015943 (G3DSA:2.130.10.GENE3D); IPR001680 (PFAM); PTHR19876 (PANTHER); IPR019775 (PROSITE_PATTERNS); IPR001680 (PROSITE_PROFILES); IPR001680 (PROSITE_PROFILES); IPR001680 (PROSITE_PROFILES); IPR017986 (PROSITE_PROFILES); SSF82171 (SUPERFAMILY); IPR017986 (SUPERFAMILY)                                                                                                                                                                                                                                                                                                                                                                                                                                                          |

|      |                                                                                                         |      |  |                                         |      |          |        |       |                                                                                                                                                                                                                                                                                                                                                                                                                                                                                                                                                                                                                                                                                                                                                                                                                                                                                 |
|------|---------------------------------------------------------------------------------------------------------|------|--|-----------------------------------------|------|----------|--------|-------|---------------------------------------------------------------------------------------------------------------------------------------------------------------------------------------------------------------------------------------------------------------------------------------------------------------------------------------------------------------------------------------------------------------------------------------------------------------------------------------------------------------------------------------------------------------------------------------------------------------------------------------------------------------------------------------------------------------------------------------------------------------------------------------------------------------------------------------------------------------------------------|
| 1455 | c36210_g1_i2_len_4006_path_53_0_671_725_672_4005_1                                                      | 1267 |  | coatomer subunit alpha                  | 1335 | 0        | 87.50% | 0.128 | IPR020472 (PRINTS); IPR001680 (SMART); IPR010714 (PFAM); IPR006692 (PFAM); IPR001680 (PFAM); IPR015943 (G3DSA:2.130.10.GENE3D); IPR016391 (PIRSF); PTHR19876 (PANTHER); IPR019775 (PROSITE_PATTERNS); IPR001680 (PROSITE_PROFILES); IPR001680 (PROSITE_PROFILES); IPR001680 (PROSITE_PROFILES); IPR001680 (PROSITE_PROFILES); IPR001680 (PROSITE_PROFILES); SSF82171 (SUPERFAMILY); IPR017986 (SUPERFAMILY)                                                                                                                                                                                                                                                                                                                                                                                                                                                                     |
| 1456 | c36228_g1_i1_len_2239_path_77_0_129_460_4_130_130_4605_131_150_4625_151_162_4_579_163_170_246_171_223_4 | 99   |  | calcium activated chlorine              | 746  | 3.95E-49 | 45.20% | 0.101 | IPR013783 (G3DSA:2.60.40.GENE3D); IPR015394 (PFAM); PTHR10579:SF43 (PANTHER); PTHR10579 (PANTHER); NON_CYTOPLASMIC_DOMAIN (PHOBIUS); CYTOPLASMIC_DOMAIN (PHOBIUS); NON_CYTOPLASMIC_DOMAIN (PHOBIUS); TRANSMEMBRANE (PHOBIUS); TRANSMEMBRANE (PHOBIUS); TRANSMEMBRANE (PHOBIUS); CYTOPLASMIC_DOMAIN (PHOBIUS); TRANSMEMBRANE (PHOBIUS); CYTOPLASMIC_DOMAIN (PHOBIUS); TMhelix (TMHMM); TMhelix (TMHMM)                                                                                                                                                                                                                                                                                                                                                                                                                                                                           |
| 1457 | c36265_g1_i1_len_822_path_1_0_278_280_2_79_279_281_280_821_0                                            | 9372 |  | unnamed protein product                 | 274  | 1.85E-09 | 73.90% | 0.128 | no IPS match                                                                                                                                                                                                                                                                                                                                                                                                                                                                                                                                                                                                                                                                                                                                                                                                                                                                    |
| 1458 | c36352_g1_i1_len_1063_path_1001_0_609_5_2_610_634_1920_635_967_1794_968_1062_3                          | 39   |  | zinc finger protein 420-like isoform x1 | 355  | 8.43E-62 | 58.10% | 0.111 | IPR015880 (SMART); IPR007087 (PFAM); IPR013087 (G3DSA:3.30.160.GENE3D); PF13894 (PFAM); PF13465 (PFAM); IPR013087 (G3DSA:3.30.160.GENE3D); PF13912 (PFAM); IPR013087 (G3DSA:3.30.160.GENE3D); PTHR24409 (PANTHER); PTHR24409:SF13 (PANTHER); IPR007087 (PROSITE_PATTERNS); IPR007087 (PROSITE_PROFILES); SSF57667 (SUPERFAMILY); SSF57667 (SUPERFAMILY); SSF57667 (SUPERFAMILY) |
| 1459 | c36352_g1_i2_len_330_path_1_0_50_52_51_75_1635_76_234_1794_235_329_3                                    | 8    |  | gastrula zinc finger protein            | 110  | 2.52E-22 | 64.40% | 0.109 | IPR015880 (SMART); PF13894 (PFAM); IPR013087 (G3DSA:3.30.160.GENE3D); IPR013087 (G3DSA:3.30.160.GENE3D); PF13465 (PFAM); PTHR24409 (PANTHER); PTHR24409:SF13 (PANTHER); IPR007087 (PROSITE_PATTERNS); IPR007087 (PROSITE_PATTERNS); IPR007087 (PROSITE_PATTERNS); IPR007087 (PROSITE_PROFILES); IPR007087 (PROSITE_PROFILES); IPR007087 (PROSITE_PROFILES); IPR007087 (PROSITE_PROFILES); SSF57667 (SUPERFAMILY); SSF57667 (SUPERFAMILY)                                                                                                                                                                                                                                                                                                                                                                                                                                        |
| 1460 | c36356_g1_i1_len_1919_path_1897_0_1918_2                                                                | 183  |  | integrin-linked protein kinase          | 639  | 0        | 86.90% | 0.182 | IPR002110 (SMART); IPR020683 (G3DSA:1.25.40.GENE3D); G3DSA:1.10.510.10 (GENE3D); IPR001245 (PFAM); IPR002110 (PFAM); G3DSA:3.30.200.20 (GENE3D); IPR020683 (PFAM); IPR020683 (G3DSA:1.25.40.GENE3D); PTHR23257:SF30 (PANTHER); PTHR23257 (PANTHER); CYTOPLASMIC_DOMAIN (PHOBIUS); TRANSMEMBRANE (PHOBIUS); NON_CYTOPLASMIC_DOMAIN (PHOBIUS); IPR020683 (PROSITE_PROFILES); IPR002110 (PROSITE_PROFILES); IPR000719 (PROSITE_PROFILES); IPR002110 (PROSITE_PROFILES); IPR002110 (PROSITE_PROFILES); IPR011009 (SUPERFAMILY); IPR020683 (SUPERFAMILY); TMhelix (TMHMM)                                                                                                                                                                                                                                                                                                            |
| 1461 | c36358_g1_i1_len_927_path_905_0_926_0                                                                   | 329  |  | neuferricin -like protein               | 309  | 1.28E-74 | 66.50% | 0.163 | IPR001199 (G3DSA:3.10.120.GENE3D); IPR001199 (PFAM); PTHR10281:SF4 (PANTHER); PTHR10281 (PANTHER); TRANSMEMBRANE (PHOBIUS); CYTOPLASMIC_DOMAIN (PHOBIUS); NON_CYTOPLASMIC_DOMAIN (PHOBIUS); IPR001199 (SUPERFAMILY); TMhelix (TMHMM)                                                                                                                                                                                                                                                                                                                                                                                                                                                                                                                                                                                                                                            |
| 1462 | c36384_g1_i1_len_899_path_233_0_622_70_623_674_232_675_898_2                                            | 206  |  | micos complex subunit mic27             | 299  | 5.07E-27 | 54.70% | 0.181 | IPR019166 (PFAM); PTHR14564 (PANTHER); PTHR14564:SF1 (PANTHER); NON_CYTOPLASMIC_DOMAIN (PHOBIUS); TRANSMEMBRANE (PHOBIUS); CYTOPLASMIC_DOMAIN (PHOBIUS); NON_CYTOPLASMIC_DOMAIN (PHOBIUS); CYTOPLASMIC_DOMAIN (PHOBIUS); TRANSMEMBRANE (PHOBIUS); TRANSMEMBRANE (PHOBIUS); TMhelix (TMHMM)                                                                                                                                                                                                                                                                                                                                                                                                                                                                                                                                                                                      |
| 1463 | c36384_g1_i2_len_944_path_233_0_622_25_623_667_70_668_719_232_720_943_2                                 | 180  |  | micos complex subunit mic27             | 314  | 6.93E-28 | 52.90% | 0.181 | IPR019166 (PFAM); PTHR14564 (PANTHER); PTHR14564:SF1 (PANTHER); NON_CYTOPLASMIC_DOMAIN (PHOBIUS); NON_CYTOPLASMIC_DOMAIN (PHOBIUS); TRANSMEMBRANE (PHOBIUS); CYTOPLASMIC_DOMAIN (PHOBIUS); TRANSMEMBRANE (PHOBIUS); CYTOPLASMIC_DOMAIN (PHOBIUS); TRANSMEMBRANE (PHOBIUS); TMhelix (TMHMM)                                                                                                                                                                                                                                                                                                                                                                                                                                                                                                                                                                                      |

|      |                                                                                                 |      |                                                                          |      |          |        |       |                                                                                                                                                                                                                                                                                                                                                                                                                                                                                                                                                                                                                                                                                                                                                                                                                                                                                                                                                                                                                                                                                                                                                                                                                                                         |
|------|-------------------------------------------------------------------------------------------------|------|--------------------------------------------------------------------------|------|----------|--------|-------|---------------------------------------------------------------------------------------------------------------------------------------------------------------------------------------------------------------------------------------------------------------------------------------------------------------------------------------------------------------------------------------------------------------------------------------------------------------------------------------------------------------------------------------------------------------------------------------------------------------------------------------------------------------------------------------------------------------------------------------------------------------------------------------------------------------------------------------------------------------------------------------------------------------------------------------------------------------------------------------------------------------------------------------------------------------------------------------------------------------------------------------------------------------------------------------------------------------------------------------------------------|
| 1464 | c36411_g1_i1_len_360_path_111_0_122_880_123_167_279_168_192_304_193_205_317_206_359_3           | 3459 | cathepsin partial                                                        | 120  | 1.39E-38 | 67.40% | 0.111 | IPR013201 (SMART); IPR013201 (PFAM); IPR000668 (PFAM); G3DSA:3.90.70.10 (GENE3D); IPR013128 (PANTHER); IPR000169 (PROSITE_PATTERNS); SSF54001 (SUPERFAMILY)                                                                                                                                                                                                                                                                                                                                                                                                                                                                                                                                                                                                                                                                                                                                                                                                                                                                                                                                                                                                                                                                                             |
| 1465 | c36418_g2_i1_len_922_path_495_0_492_988_493_520_2517_521_921_1                                  | 47   | von willebrand factor type egf and pentraxin domain-containing protein 1 | 307  | 2.71E-06 | 45.00% | 0.111 | IPR000436 (SMART); G3DSA:2.10.70.10 (GENE3D); IPR000436 (PFAM); G3DSA:2.10.70.10 (GENE3D); PTHR19325 (PANTHER); IPR000436 (PROSITE_PROFILES); SignalP-TM (SIGNALP_GRAM_POSITIVE); IPR000436 (SUPERFAMILY)                                                                                                                                                                                                                                                                                                                                                                                                                                                                                                                                                                                                                                                                                                                                                                                                                                                                                                                                                                                                                                               |
| 1466 | c36418_g3_i1_len_1113_path_1942_0_547_9_88_548_575_4404_576_1112_2                              | 68   | von willebrand factor type egf and pentraxin domain-containing protein 1 | 371  | 5.08E-09 | 42.50% | 0.224 | IPR000436 (SMART); IPR000436 (PFAM); G3DSA:2.10.70.10 (GENE3D); G3DSA:2.10.70.10 (GENE3D); PTHR19325:SF331 (PANTHER); PTHR19325 (PANTHER); IPR001368 (PROSITE_PATTERNS); IPR000436 (PROSITE_PROFILES); IPR000436 (PROSITE_PROFILES); SignalP-TM (SIGNALP_GRAM_POSITIVE); IPR000436 (SUPERFAMILY); IPR000436 (SUPERFAMILY)                                                                                                                                                                                                                                                                                                                                                                                                                                                                                                                                                                                                                                                                                                                                                                                                                                                                                                                               |
| 1467 | c36441_g1_i1_len_1361_path_1556_0_607_2_160_608_642_120_643_1360_2                              | 224  | protein spaetzle                                                         | 453  | 7.29E-31 | 53.20% | 0.256 | PTHR23199 (PANTHER); CYTOPLASMIC_DOMAIN (PHOBIUS); TRANSMEMBRANE (PHOBIUS); NON_CYTOPLASMIC_DOMAIN (PHOBIUS); IPR029034 (SUPERFAMILY); TMhelix (TMHMM)                                                                                                                                                                                                                                                                                                                                                                                                                                                                                                                                                                                                                                                                                                                                                                                                                                                                                                                                                                                                                                                                                                  |
| 1468 | c36552_g1_i1_len_3381_path_3471_0_281_7_764_282_282_3820_283_1873_5410_1874_1874_24_1875_3380_2 | 529  | basement membrane-specific heparan sulfate proteoglycan core protein     | 1127 | 0        | 68.60% | 0.161 | IPR003599 (SMART); IPR000742 (SMART); IPR003598 (SMART); IPR001791 (SMART); IPR001881 (SMART); IPR013783 (G3DSA:2.60.40.GENE3D); IPR013320 (G3DSA:2.60.120.GENE3D); IPR013320 (G3DSA:2.60.120.GENE3D); G3DSA:2.10.25.10 (GENE3D); IPR013320 (G3DSA:2.60.120.GENE3D); IPR000742 (PFAM); G3DSA:2.10.25.10 (GENE3D); IPR001791 (PFAM); IPR001791 (PFAM); PF13895 (PFAM); G3DSA:2.10.25.10 (GENE3D); PTHR10574:SF247 (PANTHER); PTHR10574 (PANTHER); IPR013032 (PROSITE_PATTERNS); IPR013032 (PROSITE_PATTERNS); IPR013032 (PROSITE_PATTERNS); IPR013032 (PROSITE_PATTERNS); IPR000152 (PROSITE_PATTERNS); CYTOPLASMIC_DOMAIN (PHOBIUS); NON_CYTOPLASMIC_DOMAIN (PHOBIUS); NON_CYTOPLASMIC_DOMAIN (PHOBIUS); TRANSMEMBRANE (PHOBIUS); TRANSMEMBRANE (PHOBIUS); IPR000742 (PROSITE_PROFILES); IPR001791 (PROSITE_PROFILES); IPR000742 (PROSITE_PROFILES); IPR001791 (PROSITE_PROFILES); IPR007110 (PROSITE_PROFILES); IPR001791 (PROSITE_PROFILES); IPR007110 (PROSITE_PROFILES); IPR000742 (PROSITE_PROFILES); SSF48726 (SUPERFAMILY); SSF48726 (SUPERFAMILY); IPR013320 (SUPERFAMILY); SSF57196 (SUPERFAMILY); IPR013320 (SUPERFAMILY); SSF57196 (SUPERFAMILY); TMhelix (TMHMM); TMhelix (TMHMM); TMhelix (TMHMM);                                         |
| 1469 | c36552_g1_i2_len_3447_path_3471_0_281_3_753_282_348_3820_349_1939_5410_1940_1940_24_1941_3446_2 | 552  | basement membrane-specific heparan sulfate proteoglycan core protein     | 1149 | 0        | 68.20% | 0.161 | IPR001881 (SMART); IPR003599 (SMART); IPR001791 (SMART); IPR000742 (SMART); IPR003598 (SMART); G3DSA:2.10.25.10 (GENE3D); IPR000742 (PFAM); IPR013320 (G3DSA:2.60.120.GENE3D); IPR001791 (PFAM); IPR013320 (G3DSA:2.60.120.GENE3D); G3DSA:2.10.25.10 (GENE3D); IPR013783 (G3DSA:2.60.40.GENE3D); G3DSA:2.10.25.10 (GENE3D); IPR013783 (G3DSA:2.60.40.GENE3D); IPR013320 (G3DSA:2.60.120.GENE3D); PF13895 (PFAM); IPR001791 (PFAM); PTHR10574:SF247 (PANTHER); PTHR10574 (PANTHER); IPR013032 (PROSITE_PATTERNS); IPR013032 (PROSITE_PATTERNS); IPR013032 (PROSITE_PATTERNS); IPR013032 (PROSITE_PATTERNS); IPR000152 (PROSITE_PATTERNS); IPR013032 (PROSITE_PATTERNS); IPR013032 (PROSITE_PATTERNS); NON_CYTOPLASMIC_DOMAIN (PHOBIUS); CYTOPLASMIC_DOMAIN (PHOBIUS); TRANSMEMBRANE (PHOBIUS); TRANSMEMBRANE (PHOBIUS); NON_CYTOPLASMIC_DOMAIN (PHOBIUS); IPR000742 (PROSITE_PROFILES); IPR001791 (PROSITE_PROFILES); IPR000742 (PROSITE_PROFILES); IPR001791 (PROSITE_PROFILES); IPR000742 (PROSITE_PROFILES); IPR007110 (PROSITE_PROFILES); IPR001791 (PROSITE_PROFILES); SSF48726 (SUPERFAMILY); IPR013320 (SUPERFAMILY); SSF57196 (SUPERFAMILY); SSF48726 (SUPERFAMILY); IPR013320 (SUPERFAMILY); TMhelix (TMHMM); TMhelix (TMHMM); TMhelix (TMHMM); |

|      |                                                                                                        |     |                                                                      |      |          |        |        |                                                                                                                                                                                                                                                                                                                                                                                                                                                                                                                                                                                                                                                                                                                                                                                                                                                                                                                                                                                                                                                                                                                                                                           |
|------|--------------------------------------------------------------------------------------------------------|-----|----------------------------------------------------------------------|------|----------|--------|--------|---------------------------------------------------------------------------------------------------------------------------------------------------------------------------------------------------------------------------------------------------------------------------------------------------------------------------------------------------------------------------------------------------------------------------------------------------------------------------------------------------------------------------------------------------------------------------------------------------------------------------------------------------------------------------------------------------------------------------------------------------------------------------------------------------------------------------------------------------------------------------------------------------------------------------------------------------------------------------------------------------------------------------------------------------------------------------------------------------------------------------------------------------------------------------|
| 1470 | c36552_g1_i3_len_3580_path_6893_0_414_3_753_415_481_3820_482_2072_5410_2073_2073_24_2074_3579_0        | 542 | basement membrane-specific heparan sulfate proteoglycan core protein | 1194 | 0        | 70.10% | 0.15   | IPR000742 (SMART); IPR001791 (SMART); IPR003599 (SMART); IPR003598 (SMART); IPR001881 (SMART); PF13895 (PFAM); IPR013783 (G3DSA:2.60.40.GENE3D); IPR000742 (PFAM); IPR013320 (G3DSA:2.60.120.GENE3D); IPR013320 (G3DSA:2.60.120.GENE3D); IPR013320 (G3DSA:2.60.120.GENE3D); IPR001791 (PFAM); G3DSA:2.10.25.10 (GENE3D); IPR001791 (PFAM); G3DSA:2.170.300.10 (GENE3D); PTHR10574 (PANTHER); PTHR10574:SF247 (PANTHER); IPR013032 (PROSITE_PATTERNS); IPR013032 (PROSITE_PATTERNS); IPR013032 (PROSITE_PATTERNS); IPR000152 (PROSITE_PATTERNS); IPR013032 (PROSITE_PATTERNS); TRANSMEMBRANE (PHOBIUS); NON_CYTOPLASMIC_DOMAIN (PHOBIUS); TRANSMEMBRANE (PHOBIUS); CYTOPLASMIC_DOMAIN (PHOBIUS); NON_CYTOPLASMIC_DOMAIN (PHOBIUS); IPR007110 (PROSITE_PROFILES); IPR001791 (PROSITE_PROFILES); IPR001791 (PROSITE_PROFILES); IPR000742 (PROSITE_PROFILES); IPR000742 (PROSITE_PROFILES); IPR000742 (PROSITE_PROFILES); IPR001791 (PROSITE_PROFILES); IPR013320 (SUPERFAMILY); SSF57196 (SUPERFAMILY); IPR013320 (SUPERFAMILY); SSF57196 (SUPERFAMILY); IPR013320 (SUPERFAMILY); SSF48726 (SUPERFAMILY); TMhelix (TMHMM); TMhelix (TMHMM); TMhelix (TMHMM); TMhelix (TMHMM) |
| 1471 | c36558_g1_i1_len_2550_path_2563_0_686_1_8_687_2549_0                                                   | 165 | protein turtle                                                       | 850  | 2.92E-67 | 49.80% | 0.103  | IPR003598 (SMART); IPR003961 (SMART); IPR003599 (SMART); IPR013098 (PFAM); PF13895 (PFAM); IPR013783 (G3DSA:2.60.40.GENE3D); IPR003961 (PFAM); IPR013783 (G3DSA:2.60.40.GENE3D); IPR013783 (G3DSA:2.60.40.GENE3D); IPR013783 (G3DSA:2.60.40.GENE3D); PTHR10489:SF510 (PANTHER); PTHR10489 (PANTHER); TRANSMEMBRANE (PHOBIUS); NON_CYTOPLASMIC_DOMAIN (PHOBIUS); CYTOPLASMIC_DOMAIN (PHOBIUS); NON_CYTOPLASMIC_DOMAIN (PHOBIUS); TRANSMEMBRANE (PHOBIUS); TRANSMEMBRANE (PHOBIUS); NON_CYTOPLASMIC_DOMAIN (PHOBIUS); CYTOPLASMIC_DOMAIN (PHOBIUS); IPR003961 (PROSITE_PROFILES); IPR007110 (PROSITE_PROFILES); IPR007110 (PROSITE_PROFILES); IPR003961 (PROSITE_PROFILES); IPR003961 (SUPERFAMILY); SSF48726 (SUPERFAMILY); TMhelix (TMHMM); TMhelix (TMHMM); TMhelix (TMHMM)                                                                                                                                                                                                                                                                                                                                                                                              |
| 1472 | c36600_g1_i1_len_621_path_91_0_246_1049_247_273_1049_274_300_1076_301_307_34_2_308_485_519_486_512_5_1 | 193 | keratin-associated protein 5-4-like isoform x1                       | 207  | 5.86E-24 | 46.50% | 0.101  | no IPS match                                                                                                                                                                                                                                                                                                                                                                                                                                                                                                                                                                                                                                                                                                                                                                                                                                                                                                                                                                                                                                                                                                                                                              |
| 1473 | c36609_g2_i1_len_1422_path_587_0_1421_4                                                                | 127 | g-protein coupled receptor mth2                                      | 474  | 3.06E-44 | 64.40% | 0.198  | IPR000832 (PFAM); PTHR12011 (PANTHER); PTHR12011:SF164 (PANTHER); TRANSMEMBRANE (PHOBIUS); TRANSMEMBRANE (PHOBIUS); CYTOPLASMIC_DOMAIN (PHOBIUS); CYTOPLASMIC_DOMAIN (PHOBIUS); TRANSMEMBRANE (PHOBIUS); NON_CYTOPLASMIC_DOMAIN (PHOBIUS); NON_CYTOPLASMIC_DOMAIN (PHOBIUS); CYTOPLASMIC_DOMAIN (PHOBIUS); TRANSMEMBRANE (PHOBIUS); IPR017981 (PROSITE_PROFILES); TMhelix (TMHMM); TMhelix (TMHMM); TMhelix (TMHMM); TMhelix (TMHMM)                                                                                                                                                                                                                                                                                                                                                                                                                                                                                                                                                                                                                                                                                                                                      |
| 1474 | c36625_g1_i1_len_621_path_649_0_620_3                                                                  | 280 | mucin- partial                                                       | 207  | 7.44E-06 | 37.00% | 0.153  | TMhelix (TMHMM); TMhelix (TMHMM)                                                                                                                                                                                                                                                                                                                                                                                                                                                                                                                                                                                                                                                                                                                                                                                                                                                                                                                                                                                                                                                                                                                                          |
| 1475 | c36625_g2_i1_len_987_path_1386_0_25_340_7_26_29_1485_30_976_3397_977_986_1                             | 661 | ---NA---                                                             | 329  |          |        | 0.186  | TMhelix (TMHMM); TMhelix (TMHMM); TMhelix (TMHMM)                                                                                                                                                                                                                                                                                                                                                                                                                                                                                                                                                                                                                                                                                                                                                                                                                                                                                                                                                                                                                                                                                                                         |
| 1476 | c36638_g1_i1_len_373_path_1_0_372_4                                                                    | 132 | zinc metalloproteinase dpy-31                                        | 124  | 7.22E-11 | 52.90% | 0.837Y | IPR001506 (PFAM); IPR024079 (G3DSA:3.40.390.GENE3D); PTHR10127 (PANTHER); NON_CYTOPLASMIC_DOMAIN (PHOBIUS); SIGNAL_PEPTIDE_H_REGION (PHOBIUS); SIGNAL_PEPTIDE (PHOBIUS); SIGNAL_PEPTIDE_N_REGION (PHOBIUS); SIGNAL_PEPTIDE_C_REGION (PHOBIUS); SignalP-noTM (SIGNALP_EUK); SSF55486 (SUPERFAMILY)                                                                                                                                                                                                                                                                                                                                                                                                                                                                                                                                                                                                                                                                                                                                                                                                                                                                         |
| 1477 | c36638_g2_i1_len_672_path_1480_0_671_0                                                                 | 596 | zinc metalloproteinase nas-13                                        | 224  | 5.12E-28 | 61.80% | 0.3    | IPR001506 (PRINTS); IPR001506 (PFAM); IPR024079 (G3DSA:3.40.390.GENE3D); PTHR10127 (PANTHER); SSF55486 (SUPERFAMILY)                                                                                                                                                                                                                                                                                                                                                                                                                                                                                                                                                                                                                                                                                                                                                                                                                                                                                                                                                                                                                                                      |
| 1478 | c36647_g1_i1_len_1175_path_187_0_1135_4_0_1136_1174_0                                                  | 901 | kcp_halai ame: full=bpti kunitz domain-containing partial            | 392  | 2.12E-27 | 60.20% | 0.122  | IPR002223 (PRINTS); IPR002223 (SMART); IPR002223 (G3DSA:4.10.410.GENE3D); IPR002223 (G3DSA:4.10.410.GENE3D); IPR002223 (PFAM); PTHR10083 (PANTHER); IPR020901 (PROSITE_PATTERNS); IPR020901 (PROSITE_PATTERNS); IPR002223 (PROSITE_PROFILES); IPR002223 (PROSITE_PROFILES); IPR002223 (SUPERFAMILY); IPR002223 (SUPERFAMILY)                                                                                                                                                                                                                                                                                                                                                                                                                                                                                                                                                                                                                                                                                                                                                                                                                                              |

|      |                                                                                                     |      |                                                          |     |           |        |         |                                                                                                                                                                                                                                                                                                                                                                                                                                                                                                          |
|------|-----------------------------------------------------------------------------------------------------|------|----------------------------------------------------------|-----|-----------|--------|---------|----------------------------------------------------------------------------------------------------------------------------------------------------------------------------------------------------------------------------------------------------------------------------------------------------------------------------------------------------------------------------------------------------------------------------------------------------------------------------------------------------------|
| 1479 | c36656_g1_i1_len_2228_path_2356_0_237_1_238_238_130_239_262_26_263_2227_2                           | 270  | bone morphogenetic protein 2-like                        | 742 | 1.09E-17  | 51.90% | 0.118   | IPR001839 (SMART); IPR029034 (G3DSA:2.10.90.GENE3D); IPR001839 (PFAM); PTHR11848:SF126 (PANTHER); IPR015615 (PANTHER); IPR017948 (PROSITE_PATTERNS); IPR001839 (PROSITE_PROFILES); IPR029034 (SUPERFAMILY)                                                                                                                                                                                                                                                                                               |
| 1480 | c36662_g1_i1_len_1271_path_1299_0_1270_5                                                            | 156  | 3-hydroxybutyrate dehydrogenase type 2                   | 423 | 1.36E-119 | 81.00% | 0.117   | IPR002347 (PRINTS); IPR002198 (PRINTS); IPR016040 (G3DSA:3.40.50.GENE3D); IPR002198 (PFAM); PTHR24321:SF3 (PANTHER); PTHR24321 (PANTHER); IPR020904 (PROSITE_PATTERNS); CYTOPLASMIC_DOMAIN (PHOBIUS); TRANSMEMBRANE (PHOBIUS); NON_CYTOPLASMIC_DOMAIN (PHOBIUS); SSF51735 (SUPERFAMILY); TMhelix (TMHMM)                                                                                                                                                                                                 |
| 1481 | c36667_g1_i1_len_1652_path_1681_0_257_1_940_258_1651_5                                              | 298  | isocitrate dehydrogenase                                 | 550 | 1.41E-180 | 82.60% | 0.113   | Coil (COILS); IPR004434 (TIGRFAM); IPR024084 (PFAM); IPR024084 (G3DSA:3.40.718.GENE3D); IPR001804 (PANTHER); PTHR11835:SF42 (PANTHER); CYTOPLASMIC_DOMAIN (PHOBIUS); NON_CYTOPLASMIC_DOMAIN (PHOBIUS); TRANSMEMBRANE (PHOBIUS); SSF53659 (SUPERFAMILY)                                                                                                                                                                                                                                                   |
| 1482 | c36673_g1_i1_len_2595_path_53_0_2594_1                                                              | 1549 | chorion peroxidase-like                                  | 865 | 2.18E-132 | 55.20% | 0.814Y  | IPR019791 (PRINTS); IPR019791 (G3DSA:1.10.640.GENE3D); IPR019791 (PFAM); PTHR11475 (PANTHER); TRANSMEMBRANE (PHOBIUS); NON_CYTOPLASMIC_DOMAIN (PHOBIUS); NON_CYTOPLASMIC_DOMAIN (PHOBIUS); CYTOPLASMIC_DOMAIN (PHOBIUS); SIGNAL_PEPTIDE_H_REGION (PHOBIUS); SIGNAL_PEPTIDE_C_REGION (PHOBIUS); SIGNAL_PEPTIDE_N_REGION (PHOBIUS); SIGNAL_PEPTIDE (PHOBIUS); TRANSMEMBRANE (PHOBIUS); IPR019791 (PROSITE_PROFILES); SignalP-noTM (SIGNALP_EUK); IPR010255 (SUPERFAMILY); TMhelix (TMHMM); TMhelix (TMHMM) |
| 1483 | c36696_g1_i1_len_1533_path_1598_0_467_3_101_468_494_2066_495_572_2144_573_967_2538_968_1000_58_10_4 | 946  | scp-like extracellular domain containing protein 1       | 511 | 3.13E-43  | 52.90% | 0.652 Y | IPR001283 (PRINTS); IPR002413 (PRINTS); IPR014044 (SMART); IPR002172 (SMART); IPR014044 (PFAM); IPR002172 (G3DSA:4.10.400.GENE3D); IPR002172 (PFAM); IPR014044 (G3DSA:3.40.33.GENE3D); IPR001283 (PANTHER); IPR023415 (PROSITE_PATTERNS); TRANSMEMBRANE (PHOBIUS); CYTOPLASMIC_DOMAIN (PHOBIUS); NON_CYTOPLASMIC_DOMAIN (PHOBIUS); IPR002172 (PROSITE_PROFILES); SignalP-noTM (SIGNALP_EUK); IPR014044 (SUPERFAMILY); IPR002172 (SUPERFAMILY)                                                            |
| 1484 | c36696_g1_i2_len_597_path_1598_0_467_31_01_468_494_2066_495_572_3245_573_583_3440_584_596_4         | 124  | low-density lipoprotein receptor-related protein partial | 199 | 4.60E-07  | 63.67% | 0.101   | IPR002172 (SMART); IPR002172 (G3DSA:4.10.400.GENE3D); IPR002172 (PFAM); IPR023415 (PROSITE_PATTERNS); IPR002172 (PROSITE_PROFILES); IPR002172 (SUPERFAMILY)                                                                                                                                                                                                                                                                                                                                              |
| 1485 | c36696_g1_i3_len_570_path_1598_0_467_20_66_468_545_3245_546_556_3440_557_569_4                      | 141  | low-density lipoprotein receptor-related protein partial | 190 | 3.76E-07  | 62.00% | 0.104   | IPR002172 (SMART); IPR002172 (G3DSA:4.10.400.GENE3D); IPR002172 (PFAM); IPR023415 (PROSITE_PATTERNS); IPR002172 (PROSITE_PROFILES); IPR002172 (SUPERFAMILY)                                                                                                                                                                                                                                                                                                                                              |
| 1486 | c36696_g1_i4_len_1506_path_1598_0_467_2_066_468_545_2144_546_940_2538_941_973_58_974_1505_4         | 1228 | scp-like extracellular domain containing protein 1       | 502 | 2.47E-43  | 52.90% | 0.652 Y | IPR002413 (PRINTS); IPR001283 (PRINTS); IPR014044 (SMART); IPR002172 (SMART); IPR014044 (PFAM); IPR002172 (PFAM); IPR014044 (G3DSA:3.40.33.GENE3D); IPR002172 (G3DSA:4.10.400.GENE3D); IPR001283 (PANTHER); IPR023415 (PROSITE_PATTERNS); TRANSMEMBRANE (PHOBIUS); NON_CYTOPLASMIC_DOMAIN (PHOBIUS); CYTOPLASMIC_DOMAIN (PHOBIUS); IPR002172 (PROSITE_PROFILES); SignalP-noTM (SIGNALP_EUK); IPR002172 (SUPERFAMILY); IPR014044 (SUPERFAMILY)                                                            |
| 1487 | c36702_g1_i1_len_1253_path_509_0_168_12_9_169_347_306_348_1252_3                                    | 697  | annexin b10-like                                         | 418 | 8.71E-117 | 71.10% | 0.145   | Coil (COILS); IPR001464 (PRINTS); IPR018502 (SMART); IPR018502 (G3DSA:1.10.220.GENE3D); IPR018502 (G3DSA:1.10.220.GENE3D); IPR018502 (PFAM); IPR018502 (G3DSA:1.10.220.GENE3D); IPR018502 (G3DSA:1.10.220.GENE3D); PTHR10502 (PANTHER); IPR018252 (PROSITE_PATTERNS); IPR018252 (PROSITE_PATTERNS); TRANSMEMBRANE (PHOBIUS); NON_CYTOPLASMIC_DOMAIN (PHOBIUS); CYTOPLASMIC_DOMAIN (PHOBIUS); SSF47874 (SUPERFAMILY)                                                                                      |
| 1488 | c36702_g1_i2_len_1253_path_509_0_168_67_7_169_347_306_348_1252_3                                    | 746  | annexin b10-like                                         | 418 | 5.37E-118 | 70.90% | 0.145   | IPR001464 (PRINTS); IPR018502 (SMART); IPR018502 (PFAM); IPR018502 (G3DSA:1.10.220.GENE3D); IPR018502 (G3DSA:1.10.220.GENE3D); IPR018502 (G3DSA:1.10.220.GENE3D); IPR018502 (G3DSA:1.10.220.GENE3D); PTHR10502 (PANTHER); IPR018252 (PROSITE_PATTERNS); IPR018252 (PROSITE_PATTERNS); NON_CYTOPLASMIC_DOMAIN (PHOBIUS); TRANSMEMBRANE (PHOBIUS); CYTOPLASMIC_DOMAIN (PHOBIUS); SSF47874 (SUPERFAMILY)                                                                                                    |



|      |                                                                                                      |      |                                                              |      |           |        |        |                                                                                                                                                                                                                                                                                                                                                                                                                                                                                                                                           |
|------|------------------------------------------------------------------------------------------------------|------|--------------------------------------------------------------|------|-----------|--------|--------|-------------------------------------------------------------------------------------------------------------------------------------------------------------------------------------------------------------------------------------------------------------------------------------------------------------------------------------------------------------------------------------------------------------------------------------------------------------------------------------------------------------------------------------------|
| 1489 | c36771_g1_i1_len_2751_path_157_0_2390_2542_2391_2417_2542_2418_2444_5290_2445_2750_3                 | 219  | hypothetical protein DAPPUDRAFT_304103                       | 917  | 0         | 60.20% | 0.164  | Coil (COILS); IPR018497 (PRINTS); IPR024079 (G3DSA:3.40.390.GENE3D); IPR018497 (PFAM); IPR008753 (PFAM); IPR000718 (PANTHER); PTHR11733:SF111 (PANTHER); TRANSMEMBRANE (PHOBIUS); NON_CYTOPLASMIC_DOMAIN (PHOBIUS); CYTOPLASMIC_DOMAIN (PHOBIUS); SSF55486 (SUPERFAMILY); TMhelix (TMHMM)                                                                                                                                                                                                                                                 |
| 1490 | c36781_g1_i1_len_717_path_1063_0_98_1162_99_166_25_167_278_137_279_319_348_320_343_372_344_716_4     | 27   | coagulation factor x                                         | 239  | 4.56E-22  | 58.60% | 0.147  | IPR001314 (PRINTS); IPR001254 (SMART); G3DSA:2.40.10.10 (GENE3D); IPR001254 (PFAM); G3DSA:2.40.10.10 (GENE3D); PTHR24265 (PANTHER); IPR018114 (PROSITE_PATTERNS); NON_CYTOPLASMIC_DOMAIN (PHOBIUS); TRANSMEMBRANE (PHOBIUS); TRANSMEMBRANE (PHOBIUS); CYTOPLASMIC_DOMAIN (PHOBIUS); CYTOPLASMIC_DOMAIN (PHOBIUS); IPR001254 (PROSITE_PROFILES); IPR009003 (SUPERFAMILY); TMhelix (TMHMM)                                                                                                                                                  |
| 1491 | c36784_g1_i1_len_1325_path_331_0_74_40675_75_142_76_223_3462_224_316_1295_317_317_236_318_502_1479_0 | 177  | tropinone reductase 2-like                                   | 442  | 1.38E-121 | 76.40% | 0.482Y | IPR002198 (PRINTS); IPR002347 (PRINTS); IPR013968 (SMART); IPR002198 (PFAM); IPR016040 (G3DSA:3.40.50.GENE3D); PTHR24322:SF111 (PANTHER); PTHR24322 (PANTHER); IPR020904 (PROSITE_PATTERNS); NON_CYTOPLASMIC_DOMAIN (PHOBIUS); CYTOPLASMIC_DOMAIN (PHOBIUS); TRANSMEMBRANE (PHOBIUS); SignalP-noTM (SIGNALP_EUK); SSF51735 (SUPERFAMILY)                                                                                                                                                                                                  |
| 1492 | c36784_g1_i3_len_1083_path_331_0_74_1295_75_75_236_76_260_1479_261_353_1272_354_1082_1               | 174  | tropinone reductase 2-like                                   | 361  | 3.72E-122 | 76.50% | 0.34   | IPR002347 (PRINTS); IPR002198 (PRINTS); IPR013968 (SMART); IPR016040 (G3DSA:3.40.50.GENE3D); IPR002198 (PFAM); PTHR24322:SF111 (PANTHER); PTHR24322 (PANTHER); IPR020904 (PROSITE_PATTERNS); NON_CYTOPLASMIC_DOMAIN (PHOBIUS); CYTOPLASMIC_DOMAIN (PHOBIUS); TRANSMEMBRANE (PHOBIUS); SSF51735 (SUPERFAMILY); TMhelix (TMHMM); TMhelix (TMHMM)                                                                                                                                                                                            |
| 1493 | c36784_g1_i4_len_1100_path_143_0_92_23693_277_1479_278_370_1272_371_1099_0                           | 154  | tropinone reductase 2-like                                   | 367  | 1.30E-122 | 76.40% | 0.335  | IPR002198 (PRINTS); IPR002347 (PRINTS); IPR013968 (SMART); IPR002198 (PFAM); IPR016040 (G3DSA:3.40.50.GENE3D); PTHR24322:SF111 (PANTHER); PTHR24322 (PANTHER); IPR020904 (PROSITE_PATTERNS); NON_CYTOPLASMIC_DOMAIN (PHOBIUS); TRANSMEMBRANE (PHOBIUS); TRANSMEMBRANE (PHOBIUS); CYTOPLASMIC_DOMAIN (PHOBIUS); NON_CYTOPLASMIC_DOMAIN (PHOBIUS); TRANSMEMBRANE (PHOBIUS); CYTOPLASMIC_DOMAIN (PHOBIUS); SSF51735 (SUPERFAMILY); TMhelix (TMHMM); TMhelix (TMHMM)                                                                          |
| 1494 | c36784_g1_i5_len_990_path_331_0_74_129575_75_236_76_260_1272_261_989_1                               | 116  | tropinone reductase 2-like                                   | 330  | 1.97E-102 | 69.40% | 0.34   | IPR002347 (PRINTS); IPR002198 (PRINTS); IPR002198 (PFAM); IPR016040 (G3DSA:3.40.50.GENE3D); IPR016040 (G3DSA:3.40.50.GENE3D); PF13561 (PFAM); PTHR24322 (PANTHER); PTHR24322:SF111 (PANTHER); IPR020904 (PROSITE_PATTERNS); CYTOPLASMIC_DOMAIN (PHOBIUS); TRANSMEMBRANE (PHOBIUS); NON_CYTOPLASMIC_DOMAIN (PHOBIUS); SSF51735 (SUPERFAMILY); TMhelix (TMHMM); TMhelix (TMHMM)                                                                                                                                                             |
| 1495 | c36790_g1_i1_len_1301_path_1479_0_1300_1                                                             | 173  | d-aspartate oxidase                                          | 434  | 3.82E-142 | 74.10% | 0.19   | G3DSA:3.30.9.10 (GENE3D); IPR006076 (PFAM); G3DSA:3.50.50.60 (GENE3D); PTHR11530:SF2 (PANTHER); IPR023209 (PANTHER); SSF54373 (SUPERFAMILY); SSF51971 (SUPERFAMILY)                                                                                                                                                                                                                                                                                                                                                                       |
| 1496 | c36798_g1_i1_len_1337_path_1465_0_1336_3                                                             | 2591 | guanine nucleotide-binding protein subunit beta-like protein | 446  | 0         | 93.20% | 0.172  | IPR020472 (PRINTS); IPR001680 (SMART); IPR001680 (PFAM); IPR015943 (G3DSA:2.130.10.GENE3D); PTHR19868 (PANTHER); PTHR19868:SF0 (PANTHER); IPR019775 (PROSITE_PATTERNS); IPR019775 (PROSITE_PATTERNS); IPR019775 (PROSITE_PATTERNS); IPR019775 (PROSITE_PATTERNS); IPR019775 (PROSITE_PATTERNS); IPR001680 (PROSITE_PROFILES); IPR017986 (PROSITE_PROFILES); IPR001680 (PROSITE_PROFILES); IPR001680 (PROSITE_PROFILES); IPR001680 (PROSITE_PROFILES); IPR001680 (PROSITE_PROFILES); IPR001680 (PROSITE_PROFILES); IPR017986 (SUPERFAMILY) |
| 1497 | c36808_g1_i1_len_3164_path_3142_0_3163_4                                                             | 1102 | transitional endoplasmic reticulum atpase ter94              | 1048 | 0         | 94.80% | 0.126  | IPR003593 (SMART); IPR004201 (SMART); IPR003338 (SMART); G3DSA:1.10.8.60 (GENE3D); G3DSA:2.40.40.20 (GENE3D); IPR005938 (TIGRFAM); IPR027417 (G3DSA:3.40.50.GENE3D); IPR004201 (PFAM); IPR027417 (G3DSA:3.40.50.GENE3D); IPR003338 (PFAM); IPR029067 (G3DSA:3.10.330.GENE3D); IPR015415 (PFAM); IPR003959 (PFAM); PTHR23077 (PANTHER); PTHR23077:SF69 (PANTHER); IPR003960 (PROSITE_PATTERNS); IPR003960 (PROSITE_PATTERNS); IPR029067 (SUPERFAMILY); IPR009010 (SUPERFAMILY); IPR027417 (SUPERFAMILY); IPR027417 (SUPERFAMILY)           |

|      |                                                                                                     |      |                                                                               |      |           |        |         |                                                                                                                                                                                                                                                                                                                                                                                                                                                                                                                                                                            |
|------|-----------------------------------------------------------------------------------------------------|------|-------------------------------------------------------------------------------|------|-----------|--------|---------|----------------------------------------------------------------------------------------------------------------------------------------------------------------------------------------------------------------------------------------------------------------------------------------------------------------------------------------------------------------------------------------------------------------------------------------------------------------------------------------------------------------------------------------------------------------------------|
| 1498 | c36810_g1_i1_len_3306_path_162_0_3305_4                                                             | 2322 | transforming growth factor-beta-induced protein ig-h3                         | 1102 | 0         | 55.80% | 0.182   | Coil (COILS); IPR000782 (SMART); IPR000782 (PFAM); IPR000782 (G3DSA:2.30.180.GENE3D); PTHR10900:SF73 (PANTHER); PTHR10900 (PANTHER); CYTOPLASMIC_DOMAIN (PHOBIUS); TRANSMEMBRANE (PHOBIUS); TRANSMEMBRANE (PHOBIUS); NON_CYTOPLASMIC_DOMAIN (PHOBIUS); TRANSMEMBRANE (PHOBIUS); CYTOPLASMIC_DOMAIN (PHOBIUS); NON_CYTOPLASMIC_DOMAIN (PHOBIUS); IPR000782 (PROSITE_PROFILES); IPR000782 (PROSITE_PROFILES); IPR000782 (PROSITE_PROFILES); IPR000782 (PROSITE_PROFILES); IPR000782 (SUPERFAMILY); IPR000782 (SUPERFAMILY); IPR000782 (SUPERFAMILY); IPR000782 (SUPERFAMILY) |
| 1499 | c36824_g1_i1_len_1601_path_3115_0_1600_3                                                            | 72   | laccase 1                                                                     | 534  | 0         | 68.70% | 0.303   | IPR01117 (PFAM); IPR011707 (PFAM); IPR008972 (G3DSA:2.60.40.GENE3D); IPR008972 (G3DSA:2.60.40.GENE3D); PTHR11709:SF33 (PANTHER); PTHR11709 (PANTHER); IPR008972 (SUPERFAMILY); IPR008972 (SUPERFAMILY)                                                                                                                                                                                                                                                                                                                                                                     |
| 1500 | c36824_g2_i1_len_766_path_744_0_765_2                                                               | 29   | low quality protein: laccase-1-like                                           | 255  | 2.51E-46  | 74.90% | 0.124   | IPR008972 (G3DSA:2.60.40.GENE3D); IPR011706 (PFAM); PTHR11709 (PANTHER); PTHR11709:SF33 (PANTHER); IPR002355 (PROSITE_PATTERNS); IPR008972 (SUPERFAMILY)                                                                                                                                                                                                                                                                                                                                                                                                                   |
| 1501 | c36830_g2_i1_len_1820_path_2204_0_1819_1                                                            | 1177 | peptidyl-prolyl cis-trans isomerase b                                         | 607  | 8.16E-108 | 86.30% | 0.489Y  | IPR002130 (PRINTS); IPR002130 (PFAM); IPR029000 (G3DSA:2.40.100.GENE3D); PTHR11071:SF63 (PANTHER); IPR024936 (PANTHER); IPR020892 (PROSITE_PATTERNS); TRANSMEMBRANE (PHOBIUS); NON_CYTOPLASMIC_DOMAIN (PHOBIUS); TRANSMEMBRANE (PHOBIUS); CYTOPLASMIC_DOMAIN (PHOBIUS); NON_CYTOPLASMIC_DOMAIN (PHOBIUS); IPR002130 (PROSITE_PROFILES); IPR029000 (SUPERFAMILY); TMhelix (TMHMM); TMhelix (TMHMM)                                                                                                                                                                          |
| 1502 | c36842_g1_i1_len_476_path_2336_0_475_1                                                              | 91   | low quality protein: hemocytin-like                                           | 159  | 7.10E-14  | 49.50% | 0.126   | IPR01846 (PFAM); G3DSA:2.10.25.10 (GENE3D); IPR01846 (PROSITE_PROFILES)                                                                                                                                                                                                                                                                                                                                                                                                                                                                                                    |
| 1503 | c36848_g1_i1_len_1312_path_1290_0_1311_2                                                            | 1021 | membrane glycoprotein lig-                                                    | 437  | 1.98E-18  | 47.00% | 0.137   | IPR003591 (SMART); G3DSA:3.80.10.10 (GENE3D); IPR001611 (PFAM); PTHR24365 (PANTHER); TRANSMEMBRANE (PHOBIUS); NON_CYTOPLASMIC_DOMAIN (PHOBIUS); CYTOPLASMIC_DOMAIN (PHOBIUS); IPR001611 (PROSITE_PROFILES); IPR001611 (PROSITE_PROFILES); IPR001611 (PROSITE_PROFILES); IPR001611 (PROSITE_PROFILES); IPR001611 (PROSITE_PROFILES); SSF52058 (SUPERFAMILY)                                                                                                                                                                                                                 |
| 1504 | c36849_g1_i1_len_1095_path_143_0_502_64_3_503_522_2464_523_1094_0                                   | 2404 | glycosyl-phosphatidylinositol-linked carbonic anhydrase                       | 365  | 2.87E-85  | 63.40% | 0.127   | IPR001148 (SMART); IPR001148 (G3DSA:3.10.200.GENE3D); IPR001148 (PFAM); IPR023561 (PANTHER); IPR018338 (PROSITE_PATTERNS); IPR001148 (PROSITE_PROFILES); IPR001148 (SUPERFAMILY)                                                                                                                                                                                                                                                                                                                                                                                           |
| 1505 | c36850_g1_i1_len_1750_path_1928_0_1749_1                                                            | 2289 | von willebrand factor type egf and pentraxin domain-containing protein 1-like | 583  | 2.72E-10  | 41.80% | 0.098   | Coil (COILS); IPR000436 (SMART); G3DSA:2.10.70.10 (GENE3D); IPR000436 (PFAM); G3DSA:2.10.70.10 (GENE3D); IPR000436 (PROSITE_PROFILES); IPR000436 (PROSITE_PROFILES); IPR000436 (SUPERFAMILY); IPR000436 (SUPERFAMILY)                                                                                                                                                                                                                                                                                                                                                      |
| 1506 | c36861_g1_i1_len_1942_path_1_0_1941_0                                                               | 199  | katanin p60 atpase-containing subunit a-like 1-like isoform x2                | 648  | 0         | 82.10% | 0.383 Y | IPR003593 (SMART); IPR015415 (PFAM); IPR027417 (G3DSA:3.40.50.GENE3D); G3DSA:1.10.8.60 (GENE3D); IPR003959 (PFAM); PTHR23074 (PANTHER); PTHR23074:SF65 (PANTHER); IPR003960 (PROSITE_PATTERNS); SIGNAL_PEPTIDE (PHOBIUS); SIGNAL_PEPTIDE_H_REGION (PHOBIUS); NON_CYTOPLASMIC_DOMAIN (PHOBIUS); CYTOPLASMIC_DOMAIN (PHOBIUS); TRANSMEMBRANE (PHOBIUS); TRANSMEMBRANE (PHOBIUS); SIGNAL_PEPTIDE_N_REGION (PHOBIUS); NON_CYTOPLASMIC_DOMAIN (PHOBIUS); SIGNAL_PEPTIDE_C_REGION (PHOBIUS); IPR028596 (HAMAP); IPR027417 (SUPERFAMILY); TMhelix (TMHMM)                         |
| 1507 | c36875_g1_i1_len_679_path_890_0_56_947_57_92_983_93_408_1299_409_409_1300_4_10_516_1405_517_554_1_4 | 105  | lipophorin receptor isoform e                                                 | 226  | 2.73E-12  | 58.00% | 0.106   | IPR002172 (PRINTS); IPR002172 (SMART); IPR002172 (PFAM); IPR002172 (G3DSA:4.10.400.GENE3D); IPR002172 (G3DSA:4.10.400.GENE3D); PTHR10529:SF208 (PANTHER); PTHR10529 (PANTHER); IPR023415 (PROSITE_PATTERNS); IPR002172 (PROSITE_PROFILES); IPR002172 (PROSITE_PROFILES); IPR002172 (SUPERFAMILY); IPR002172 (SUPERFAMILY)                                                                                                                                                                                                                                                  |

|      |                                                                                                               |     |                                            |      |           |        |        |                                                                                                                                                                                                                                                                                                                                                                                                                                                                                                                                                                                                                                                                                                                                                                                                            |
|------|---------------------------------------------------------------------------------------------------------------|-----|--------------------------------------------|------|-----------|--------|--------|------------------------------------------------------------------------------------------------------------------------------------------------------------------------------------------------------------------------------------------------------------------------------------------------------------------------------------------------------------------------------------------------------------------------------------------------------------------------------------------------------------------------------------------------------------------------------------------------------------------------------------------------------------------------------------------------------------------------------------------------------------------------------------------------------------|
| 1508 | c36882_g2_i1_len_1589_path_4786_0_347_1<br>490_348_366_5152_367_539_2521_540_158<br>8_5                       | 749 | adiponectin receptor protein               | 529  | 5.29E-170 | 84.10% | 0.282  | IPR004254 (PFAM); PTHR20855:SF15 (PANTHER); IPR004254 (PANTHER); TRANSMEMBRANE (PHOBIUS); NON_CYTOPLASMIC_DOMAIN (PHOBIUS); TRANSMEMBRANE (PHOBIUS); NON_CYTOPLASMIC_DOMAIN (PHOBIUS); NON_CYTOPLASMIC_DOMAIN (PHOBIUS); TRANSMEMBRANE (PHOBIUS); TRANSMEMBRANE (PHOBIUS); CYTOPLASMIC_DOMAIN (PHOBIUS); TRANSMEMBRANE (PHOBIUS); CYTOPLASMIC_DOMAIN (PHOBIUS); TRANSMEMBRANE (PHOBIUS); NON_CYTOPLASMIC_DOMAIN (PHOBIUS); TRANSMEMBRANE (PHOBIUS); NON_CYTOPLASMIC_DOMAIN (PHOBIUS); CYTOPLASMIC_DOMAIN (PHOBIUS); CYTOPLASMIC_DOMAIN (PHOBIUS); CYTOPLASMIC_DOMAIN (PHOBIUS); TRANSMEMBRANE (PHOBIUS); TRANSMEMBRANE (PHOBIUS); TMhelix (TMHMM); TMhelix (TMHMM) |
| 1509 | c36882_g2_i2_len_1618_path_1113_0_376_1<br>490_377_395_5152_396_568_2521_569_161<br>7_5                       | 631 | adiponectin receptor protein               | 539  | 2.79E-150 | 84.00% | 0.282  | IPR004254 (PFAM); IPR004254 (PANTHER); PTHR20855:SF15 (PANTHER); TRANSMEMBRANE (PHOBIUS); TRANSMEMBRANE (PHOBIUS); NON_CYTOPLASMIC_DOMAIN (PHOBIUS); CYTOPLASMIC_DOMAIN (PHOBIUS); TRANSMEMBRANE (PHOBIUS); TRANSMEMBRANE (PHOBIUS); TRANSMEMBRANE (PHOBIUS); NON_CYTOPLASMIC_DOMAIN (PHOBIUS); NON_CYTOPLASMIC_DOMAIN (PHOBIUS); CYTOPLASMIC_DOMAIN (PHOBIUS); TRANSMEMBRANE (PHOBIUS); NON_CYTOPLASMIC_DOMAIN (PHOBIUS); NON_CYTOPLASMIC_DOMAIN (PHOBIUS); CYTOPLASMIC_DOMAIN (PHOBIUS); CYTOPLASMIC_DOMAIN (PHOBIUS); TRANSMEMBRANE (PHOBIUS); TRANSMEMBRANE (PHOBIUS); TMhelix (TMHMM); TMhelix (TMHMM); TMhelix (TMHMM); TMhelix (TMHMM); TMhelix (TMHMM); TMhelix (TMHMM)                                                                                                                            |
| 1510 | c36882_g2_i3_len_1879_path_6347_0_21_51<br>52_22_194_1888_195_803_2496_804_804_1<br>089_805_829_2521_830_18_4 | 650 | adiponectin receptor protein               | 626  | 1.50E-19  | 77.70% | 0.122  | IPR004254 (PFAM); PTHR20855:SF15 (PANTHER); IPR004254 (PANTHER); NON_CYTOPLASMIC_DOMAIN (PHOBIUS); TRANSMEMBRANE (PHOBIUS); NON_CYTOPLASMIC_DOMAIN (PHOBIUS); TRANSMEMBRANE (PHOBIUS); CYTOPLASMIC_DOMAIN (PHOBIUS); TRANSMEMBRANE (PHOBIUS); TRANSMEMBRANE (PHOBIUS); NON_CYTOPLASMIC_DOMAIN (PHOBIUS); CYTOPLASMIC_DOMAIN (PHOBIUS); TMhelix (TMHMM); TMhelix (TMHMM); TMhelix (TMHMM); TMhelix (TMHMM)                                                                                                                                                                                                                                                                                                                                                                                                  |
| 1511 | c36882_g2_i3_len_1879_path_6347_0_21_51<br>52_22_194_1888_195_803_2496_804_804_1<br>089_805_829_2521_830_18_5 | 650 | adiponectin receptor protein               | 626  | 1.90E-108 | 84.20% | 0.282  | IPR004254 (PFAM); PTHR20855:SF15 (PANTHER); IPR004254 (PANTHER); CYTOPLASMIC_DOMAIN (PHOBIUS); TRANSMEMBRANE (PHOBIUS); CYTOPLASMIC_DOMAIN (PHOBIUS); TRANSMEMBRANE (PHOBIUS); TRANSMEMBRANE (PHOBIUS); NON_CYTOPLASMIC_DOMAIN (PHOBIUS); CYTOPLASMIC_DOMAIN (PHOBIUS); TRANSMEMBRANE (PHOBIUS); NON_CYTOPLASMIC_DOMAIN (PHOBIUS); TRANSMEMBRANE (PHOBIUS); NON_CYTOPLASMIC_DOMAIN (PHOBIUS); TRANSMEMBRANE (PHOBIUS); CYTOPLASMIC_DOMAIN (PHOBIUS); TMhelix (TMHMM); TMhelix (TMHMM)                                                                                                                                                                              |
| 1512 | c36907_g1_i1_len_1662_path_1_0_39_41_40<br>_40_42_41_1661_5                                                   | 177 | deoxyribonuclease-1                        | 554  | 5.27E-81  | 61.60% | 0.743Y | IPR016202 (PRINTS); IPR016202 (SMART); IPR005135 (PFAM); IPR005135 (G3DSA:3.60.10.GENE3D); IPR016202 (PANTHER); SIGNAL_PEPTIDE (PHOBIUS); NON_CYTOPLASMIC_DOMAIN (PHOBIUS); SIGNAL_PEPTIDE_C_REGION (PHOBIUS); SIGNAL_PEPTIDE_N_REGION (PHOBIUS); SIGNAL_PEPTIDE_H_REGION (PHOBIUS); CYTOPLASMIC_DOMAIN (PHOBIUS); TRANSMEMBRANE (PHOBIUS); SignalP-noTM (SIGNALP_EUK); IPR005135 (SUPERFAMILY)                                                                                                                                                                                                                                                                                                                                                                                                            |
| 1513 | c36911_g1_i1_len_3284_path_3298_0_2768_<br>6736_2769_2779_6079_2780_2781_36_2782<br>_3283_2                   | 720 | retinoid-inducible serine carboxypeptidase | 1087 | 1.59E-141 | 67.10% | 0.15   | IPR001563 (PRINTS); IPR001563 (PFAM); IPR029058 (G3DSA:3.40.50.GENE3D); IPR001563 (PANTHER); PTHR11802:SF3 (PANTHER); IPR018202 (PROSITE_PATTERNS); TRANSMEMBRANE (PHOBIUS); CYTOPLASMIC_DOMAIN (PHOBIUS); TRANSMEMBRANE (PHOBIUS); TRANSMEMBRANE (PHOBIUS); NON_CYTOPLASMIC_DOMAIN (PHOBIUS); CYTOPLASMIC_DOMAIN (PHOBIUS); NON_CYTOPLASMIC_DOMAIN (PHOBIUS); NON_CYTOPLASMIC_DOMAIN (PHOBIUS); TRANSMEMBRANE (PHOBIUS); IPR029058 (SUPERFAMILY); TMhelix (TMHMM); TMhelix (TMHMM); TMhelix (TMHMM); TMhelix (TMHMM)                                                                                                                                                                                                                                                                                      |

|      |                                                                                 |      |                                                 |      |          |        |       |                                                                                                                                                                                                                                                                                                                                                                                                                                                                                                                                                                                                                                                                                                                                                                                                                                                                                                                                             |
|------|---------------------------------------------------------------------------------|------|-------------------------------------------------|------|----------|--------|-------|---------------------------------------------------------------------------------------------------------------------------------------------------------------------------------------------------------------------------------------------------------------------------------------------------------------------------------------------------------------------------------------------------------------------------------------------------------------------------------------------------------------------------------------------------------------------------------------------------------------------------------------------------------------------------------------------------------------------------------------------------------------------------------------------------------------------------------------------------------------------------------------------------------------------------------------------|
| 1514 | c36914_g1_i1_len_1631_path_925_0_755_16_81_756_785_1862_786_802_2002_803_1630_1 | 191  | af425264_1lysozyme precursor                    | 544  | 3.07E-37 | 65.30% | 0.108 | IPR000974 (PRINTS); IPR001916 (PRINTS); IPR001916 (SMART); IPR001916 (PFAM); G3DSA:1.10.530.10 (GENE3D); PTHR11407 (PANTHER); TRANSMEMBRANE (PHOBIUS); NON_CYTOPLASMIC_DOMAIN (PHOBIUS); TRANSMEMBRANE (PHOBIUS); NON_CYTOPLASMIC_DOMAIN (PHOBIUS); TRANSMEMBRANE (PHOBIUS); CYTOPLASMIC_DOMAIN (PHOBIUS); CYTOPLASMIC_DOMAIN (PHOBIUS); CYTOPLASMIC_DOMAIN (PHOBIUS); TRANSMEMBRANE (PHOBIUS); IPR001916 (PROSITE_PROFILES); IPR023346 (SUPERFAMILY); TMhelix (TMHMM); TMhelix (TMHMM)                                                                                                                                                                                                                                                                                                                                                                                                                                                     |
| 1515 | c36914_g1_i2_len_872_path_925_0_755_168_1_756_785_1711_786_856_2941_857_871_1   | 217  | af425264_1lysozyme precursor                    | 291  | 1.76E-35 | 65.40% | 0.108 | IPR001916 (PRINTS); IPR000974 (PRINTS); IPR001916 (SMART); G3DSA:1.10.530.10 (GENE3D); IPR001916 (PFAM); PTHR11407 (PANTHER); IPR001916 (PROSITE_PROFILES); IPR023346 (SUPERFAMILY)                                                                                                                                                                                                                                                                                                                                                                                                                                                                                                                                                                                                                                                                                                                                                         |
| 1516 | c36922_g1_i1_len_1306_path_53_0_599_651_600_618_670_619_1305_5                  | 1348 | macrophage migration inhibitory factor          | 435  | 3.90E-37 | 69.80% | 0.126 | G3DSA:3.30.429.10 (GENE3D); IPR001398 (PFAM); PTHR11954:SF6 (PANTHER); IPR001398 (PANTHER); TRANSMEMBRANE (PHOBIUS); CYTOPLASMIC_DOMAIN (PHOBIUS); NON_CYTOPLASMIC_DOMAIN (PHOBIUS); IPR001398 (PRODOM); IPR014347 (SUPERFAMILY); TMhelix (TMHMM); TMhelix (TMHMM)                                                                                                                                                                                                                                                                                                                                                                                                                                                                                                                                                                                                                                                                          |
| 1517 | c36932_g1_i1_len_1849_path_129_0_268_63_269_281_76_282_1848_1                   | 123  | low quality protein: cubilin                    | 616  | 2.56E-38 | 47.20% | 0.116 | IPR000859 (SMART); IPR000859 (G3DSA:2.60.120.GENE3D); IPR000859 (G3DSA:2.60.120.GENE3D); IPR000859 (PFAM); IPR002035 (G3DSA:3.40.50.GENE3D); IPR002035 (PFAM); PTHR10127 (PANTHER); IPR000859 (PROSITE_PROFILES); IPR000859 (PROSITE_PROFILES); IPR000859 (PROSITE_PROFILES); IPR002035 (PROSITE_PROFILES); IPR002035 (SUPERFAMILY); IPR000859 (SUPERFAMILY); IPR000859 (SUPERFAMILY); IPR000859 (SUPERFAMILY)                                                                                                                                                                                                                                                                                                                                                                                                                                                                                                                              |
| 1518 | c36953_g1_i2_len_1446_path_1524_0_932_2_455_933_1445_0                          | 375  | 3-hydroxyisobutyrate dehydrogenase              | 482  | 2.49E-63 | 54.90% | 0.14  | IPR006115 (PFAM); IPR013328 (G3DSA:1.10.1040.GENE3D); IPR029154 (PFAM); IPR016040 (G3DSA:3.40.50.GENE3D); PTHR22981:SF7 (PANTHER); PTHR22981 (PANTHER); IPR029752 (PROSITE_PATTERNS); SSF51735 (SUPERFAMILY); IPR008927 (SUPERFAMILY)                                                                                                                                                                                                                                                                                                                                                                                                                                                                                                                                                                                                                                                                                                       |
| 1519 | c36957_g1_i1_len_3282_path_1_0_2099_210_1_2100_3281_1                           | 569  | methylmalonate-semialdehyde dehydrogenase       | 1094 | 0        | 87.60% | 0.127 | IPR016162 (G3DSA:3.40.605.GENE3D); IPR015590 (PFAM); IPR016163 (G3DSA:3.40.309.GENE3D); IPR010061 (TIGRFAM); IPR010061 (PTHR11699:PANTHER); PTHR11699 (PANTHER); IPR016160 (PROSITE_PATTERNS); TRANSMEMBRANE (PHOBIUS); CYTOPLASMIC_DOMAIN (PHOBIUS); NON_CYTOPLASMIC_DOMAIN (PHOBIUS); NON_CYTOPLASMIC_DOMAIN (PHOBIUS); TRANSMEMBRANE (PHOBIUS); TRANSMEMBRANE (PHOBIUS); NON_CYTOPLASMIC_DOMAIN (PHOBIUS); TRANSMEMBRANE (PHOBIUS); IPR016161 (SUPERFAMILY); TMhelix (TMHMM); TMhelix (TMHMM); TMhelix (TMHMM)                                                                                                                                                                                                                                                                                                                                                                                                                           |
| 1520 | c36967_g1_i1_len_3095_path_3622_0_3094_4                                        | 911  | 26s proteasome non-atpase regulatory subunit 10 | 1032 | 6.57E-75 | 71.30% | 0.142 | IPR002110 (PRINTS); IPR002110 (SMART); IPR020683 (PFAM); IPR020683 (G3DSA:1.25.40.GENE3D); IPR020683 (G3DSA:1.25.40.GENE3D); PTHR24199 (PANTHER); TRANSMEMBRANE (PHOBIUS); NON_CYTOPLASMIC_DOMAIN (PHOBIUS); TRANSMEMBRANE (PHOBIUS); NON_CYTOPLASMIC_DOMAIN (PHOBIUS); TRANSMEMBRANE (PHOBIUS); CYTOPLASMIC_DOMAIN (PHOBIUS); CYTOPLASMIC_DOMAIN (PHOBIUS); CYTOPLASMIC_DOMAIN (PHOBIUS); TRANSMEMBRANE (PHOBIUS); NON_CYTOPLASMIC_DOMAIN (PHOBIUS); NON_CYTOPLASMIC_DOMAIN (PHOBIUS); TRANSMEMBRANE (PHOBIUS); TRANSMEMBRANE (PHOBIUS); CYTOPLASMIC_DOMAIN (PHOBIUS); TRANSMEMBRANE (PHOBIUS); TRANSMEMBRANE (PHOBIUS); CYTOPLASMIC_DOMAIN (PHOBIUS); IPR002110 (PROSITE_PROFILES); IPR002110 (PROSITE_PROFILES); IPR002110 (PROSITE_PROFILES); IPR002110 (PROSITE_PROFILES); IPR020683 (PROSITE_PROFILES); IPR020683 (SUPERFAMILY); TMhelix (TMHMM); TMhelix (TMHMM); TMhelix (TMHMM); TMhelix (TMHMM); TMhelix (TMHMM); TMhelix (TMHMM) |





|      |                                                                                                        |     |                                         |      |           |        |        |                                                                                                                                                                                                                                                                                                                                                                                                                                                                                                                                                                                                                              |
|------|--------------------------------------------------------------------------------------------------------|-----|-----------------------------------------|------|-----------|--------|--------|------------------------------------------------------------------------------------------------------------------------------------------------------------------------------------------------------------------------------------------------------------------------------------------------------------------------------------------------------------------------------------------------------------------------------------------------------------------------------------------------------------------------------------------------------------------------------------------------------------------------------|
| 1529 | c37085_g1_i1_len_2337_path_209_0_2336_0                                                                | 389 | aquaporin 1                             | 779  | 3.99E-103 | 72.70% | 0.119  | IPR000425 (PRINTS); IPR000425 (PFAM); IPR000425 (TIGRFAM); IPR023271 (G3DSA:1.20.1080.GENE3D); IPR000425 (PANTHER); TRANSMEMBRANE (PHOBIUS); CYTOPLASMIC_DOMAIN (PHOBIUS); CYTOPLASMIC_DOMAIN (PHOBIUS); TRANSMEMBRANE (PHOBIUS); NON_CYTOPLASMIC_DOMAIN (PHOBIUS); NON_CYTOPLASMIC_DOMAIN (PHOBIUS); TRANSMEMBRANE (PHOBIUS); TRANSMEMBRANE (PHOBIUS); CYTOPLASMIC_DOMAIN (PHOBIUS); IPR023271 (SUPERFAMILY); TMhelix (TMHMM); TMhelix (TMHMM); TMhelix (TMHMM); TMhelix (TMHMM); TMhelix (TMHMM); TMhelix (TMHMM); TMhelix (TMHMM)                                                                                         |
| 1530 | c37090_g1_i1_len_838_path_816_0_755_157_2_756_756_1573_757_837_4                                       | 54  | dnaj homolog subfamily c member 30-like | 279  | 6.53E-26  | 54.20% | 0.134  | IPR001623 (PRINTS); IPR001623 (SMART); IPR001623 (PFAM); IPR001623 (G3DSA:1.10.287.GENE3D); PTHR24078 (PANTHER); PTHR24078:SF171 (PANTHER); IPR018253 (PROSITE_PATTERNS); IPR001623 (PROSITE_PROFILES); IPR001623 (SUPERFAMILY)                                                                                                                                                                                                                                                                                                                                                                                              |
| 1531 | c37109_g1_i2_len_2559_path_2537_0_863_3_401_864_884_3422_885_2200_4738_2201_2_558_3                    | 206 | amyloid beta a4 protein                 | 853  | 4.02E-78  | 53.60% | 0.102  | IPR002223 (PRINTS); IPR002223 (SMART); IPR000716 (SMART); IPR002223 (PFAM); IPR000716 (PFAM); IPR002223 (G3DSA:4.10.410.GENE3D); IPR002223 (G3DSA:4.10.410.GENE3D); IPR000716 (G3DSA:4.10.800.GENE3D); PTHR10083 (PANTHER); IPR000716 (PROSITE_PATTERNS); IPR000716 (PROSITE_PATTERNS); IPR020901 (PROSITE_PATTERNS); CYTOPLASMIC_DOMAIN (PHOBIUS); NON_CYTOPLASMIC_DOMAIN (PHOBIUS); TRANSMEMBRANE (PHOBIUS); IPR002223 (PROSITE_PROFILES); IPR000716 (PROSITE_PROFILES); IPR000716 (PROSITE_PROFILES); IPR002223 (SUPERFAMILY); IPR002223 (SUPERFAMILY); IPR000716 (SUPERFAMILY); IPR000716 (SUPERFAMILY); TMhelix (TMHMM) |
| 1532 | c37137_g1_i1_len_3014_path_6082_0_1799_7881_1800_1808_3612_1809_1854_7934_18_55_2006_509_2007_2068_1_0 | 239 | agap000815-pa-like protein              | 1005 | 5.69E-98  | 59.50% | 0.131  | IPR015812 (PRINTS); G3DSA:1.20.5.100 (GENE3D); IPR014836 (PFAM); G3DSA:2.10.25.10 (GENE3D); IPR012896 (PFAM); G3DSA:2.10.25.10 (GENE3D); IPR015812 (PANTHER); PTHR10082:SF16 (PANTHER); IPR015812 (PROSITE_PATTERNS); IPR015812 (PROSITE_PATTERNS); IPR015812 (PROSITE_PATTERNS); CYTOPLASMIC_DOMAIN (PHOBIUS); TRANSMEMBRANE (PHOBIUS); NON_CYTOPLASMIC_DOMAIN (PHOBIUS); IPR012896 (SUPERFAMILY); SSF57196 (SUPERFAMILY); TMhelix (TMHMM); TMhelix (TMHMM)                                                                                                                                                                 |
| 1533 | c37137_g1_i2_len_2496_path_6082_0_1799_3603_1800_1808_3612_1809_1854_325_185_5_2038_509_2039_2100_81_0 | 147 | agap000815-pa-like protein              | 832  | 2.12E-98  | 59.50% | 0.131  | IPR015812 (PRINTS); G3DSA:1.20.5.100 (GENE3D); G3DSA:2.10.25.10 (GENE3D); IPR012896 (PFAM); IPR014836 (PFAM); G3DSA:2.10.25.10 (GENE3D); IPR015812 (PANTHER); PTHR10082:SF16 (PANTHER); IPR015812 (PROSITE_PATTERNS); IPR015812 (PROSITE_PATTERNS); IPR015812 (PROSITE_PATTERNS); NON_CYTOPLASMIC_DOMAIN (PHOBIUS); CYTOPLASMIC_DOMAIN (PHOBIUS); TRANSMEMBRANE (PHOBIUS); SSF57196 (SUPERFAMILY); IPR012896 (SUPERFAMILY); TMhelix (TMHMM); TMhelix (TMHMM)                                                                                                                                                                 |
| 1534 | c37192_g1_i1_len_900_path_1191_0_118_10_8_119_180_1370_181_899_2                                       | 136 | u8-agatoxin-ao1a-like isoform x2        | 300  | 4.22E-35  | 73.00% | 0.672Y | IPR004169 (PFAM); NON_CYTOPLASMIC_DOMAIN (PHOBIUS); SIGNAL_PEPTIDE_H_REGION (PHOBIUS); TRANSMEMBRANE (PHOBIUS); TRANSMEMBRANE (PHOBIUS); SIGNAL_PEPTIDE_N_REGION (PHOBIUS); SIGNAL_PEPTIDE_C_REGION (PHOBIUS); NON_CYTOPLASMIC_DOMAIN (PHOBIUS); CYTOPLASMIC_DOMAIN (PHOBIUS); SIGNAL_PEPTIDE (PHOBIUS); SignalP-TM (SIGNALP_GRAM_NEGATIVE); SignalP-TM (SIGNALP_EUK); SSF57059 (SUPERFAMILY); TMhelix (TMHMM); TMhelix (TMHMM)                                                                                                                                                                                              |
| 1535 | c37192_g1_i2_len_927_path_1191_0_118_10_8_119_180_2083_181_207_1370_208_926_2                          | 116 | u8-agatoxin-ao1a-like isoform x1        | 309  | 2.72E-41  | 75.90% | 0.648Y | IPR004169 (PFAM); SIGNAL_PEPTIDE (PHOBIUS); SIGNAL_PEPTIDE_H_REGION (PHOBIUS); SIGNAL_PEPTIDE_N_REGION (PHOBIUS); TRANSMEMBRANE (PHOBIUS); NON_CYTOPLASMIC_DOMAIN (PHOBIUS); SIGNAL_PEPTIDE_C_REGION (PHOBIUS); NON_CYTOPLASMIC_DOMAIN (PHOBIUS); TRANSMEMBRANE (PHOBIUS); CYTOPLASMIC_DOMAIN (PHOBIUS); SignalP-TM (SIGNALP_EUK); SignalP-TM (SIGNALP_GRAM_NEGATIVE); SSF57059 (SUPERFAMILY); TMhelix (TMHMM); TMhelix (TMHMM)                                                                                                                                                                                              |

|      |                                                                                                       |     |                                                     |      |           |        |        |                                                                                                                                                                                                                                                                                                                                                                                                                                                                                                                                                                                                                                                                                                                                                                                                    |
|------|-------------------------------------------------------------------------------------------------------|-----|-----------------------------------------------------|------|-----------|--------|--------|----------------------------------------------------------------------------------------------------------------------------------------------------------------------------------------------------------------------------------------------------------------------------------------------------------------------------------------------------------------------------------------------------------------------------------------------------------------------------------------------------------------------------------------------------------------------------------------------------------------------------------------------------------------------------------------------------------------------------------------------------------------------------------------------------|
| 1536 | c37192_g1_i3_len_1011_path_1191_0_118_2_4_119_202_108_203_264_2083_265_291_13_70_292_1010_2           | 110 | u8-agatoxin-ao1a-like isoform x1                    | 337  | 9.80E-38  | 69.70% | 0.594Y | IPR004169 (PFAM); NON_CYTOPLASMIC_DOMAIN (PHOBIUS); CYTOPLASMIC_DOMAIN (PHOBIUS); TRANSMEMBRANE (PHOBIUS); TRANSMEMBRANE (PHOBIUS); SIGNAL_PEPTIDE_N_REGION (PHOBIUS); SIGNAL_PEPTIDE_C_REGION (PHOBIUS); SIGNAL_PEPTIDE_H_REGION (PHOBIUS); SIGNAL_PEPTIDE (PHOBIUS); NON_CYTOPLASMIC_DOMAIN (PHOBIUS); SignalP-TM (SIGNALP_EUK); SSF57059 (SUPERFAMILY); TMhelix (TMHMM); TMhelix (TMHMM)                                                                                                                                                                                                                                                                                                                                                                                                        |
| 1537 | c37192_g1_i4_len_984_path_1191_0_118_24_119_202_108_203_264_1370_265_983_2                            | 124 | u16-lycotoxin-ls1b-like isoform x2                  | 328  | 1.59E-31  | 67.30% | 0.594Y | IPR004169 (PFAM); SIGNAL_PEPTIDE_N_REGION (PHOBIUS); SIGNAL_PEPTIDE_H_REGION (PHOBIUS); SIGNAL_PEPTIDE_C_REGION (PHOBIUS); CYTOPLASMIC_DOMAIN (PHOBIUS); SIGNAL_PEPTIDE (PHOBIUS); NON_CYTOPLASMIC_DOMAIN (PHOBIUS); TRANSMEMBRANE (PHOBIUS); TRANSMEMBRANE (PHOBIUS); NON_CYTOPLASMIC_DOMAIN (PHOBIUS); SignalP-TM (SIGNALP_EUK); SSF57059 (SUPERFAMILY); TMhelix (TMHMM); TMhelix (TMHMM)                                                                                                                                                                                                                                                                                                                                                                                                        |
| 1538 | c37208_g1_i1_len_1978_path_53_0_33_87_3_4_1977_5                                                      | 479 | sphingomyelin phosphodiesterase                     | 659  | 1.53E-177 | 62.80% | 0.221  | IPR008139 (SMART); IPR029052 (G3DSA:3.60.21.GENE3D); IPR011160 (PIRSF); IPR004843 (PFAM); IPR007856 (PFAM); IPR011001 (G3DSA:1.10.225.GENE3D); PTHR10340:SF13 (PANTHER); PTHR10340 (PANTHER); CYTOPLASMIC_DOMAIN (PHOBIUS); NON_CYTOPLASMIC_DOMAIN (PHOBIUS); TRANSMEMBRANE (PHOBIUS); IPR008139 (PROSITE_PROFILES); IPR011001 (SUPERFAMILY); IPR029052 (SUPERFAMILY); TMhelix (TMHMM)                                                                                                                                                                                                                                                                                                                                                                                                             |
| 1539 | c37267_g1_i1_len_3154_path_3132_0_716_3_849_717_743_3876_744_1209_4342_1210_3_153_3                   | 357 | dipeptidyl aminopeptidase-like protein 6 isoform x1 | 1052 | 0         | 62.10% | 0.106  | IPR001375 (PFAM); IPR002469 (G3DSA:2.140.10.GENE3D); IPR002469 (PFAM); IPR029058 (G3DSA:3.40.50.GENE3D); PTHR11731:SF22 (PANTHER); PTHR11731 (PANTHER); CYTOPLASMIC_DOMAIN (PHOBIUS); TRANSMEMBRANE (PHOBIUS); NON_CYTOPLASMIC_DOMAIN (PHOBIUS); NON_CYTOPLASMIC_DOMAIN (PHOBIUS); TRANSMEMBRANE (PHOBIUS); SSF82171 (SUPERFAMILY); IPR029058 (SUPERFAMILY); TMhelix (TMHMM)                                                                                                                                                                                                                                                                                                                                                                                                                       |
| 1540 | c37267_g1_i2_len_3127_path_3132_0_716_3_876_717_1182_4342_1183_3126_3                                 | 322 | dipeptidyl aminopeptidase-like protein 6 isoform x1 | 1043 | 0         | 61.20% | 0.106  | IPR001375 (PFAM); IPR002469 (G3DSA:2.140.10.GENE3D); IPR002469 (PFAM); IPR029058 (G3DSA:3.40.50.GENE3D); PTHR11731:SF22 (PANTHER); PTHR11731 (PANTHER); CYTOPLASMIC_DOMAIN (PHOBIUS); TRANSMEMBRANE (PHOBIUS); NON_CYTOPLASMIC_DOMAIN (PHOBIUS); TRANSMEMBRANE (PHOBIUS); NON_CYTOPLASMIC_DOMAIN (PHOBIUS); SSF82171 (SUPERFAMILY); IPR029058 (SUPERFAMILY); TMhelix (TMHMM)                                                                                                                                                                                                                                                                                                                                                                                                                       |
| 1541 | c37305_g1_i1_len_2060_path_117_0_1410_1_528_1411_1568_1686_1569_1992_4555_199_3_1993_4466_1994_2059_3 | 335 | lissencephaly-1 homolog                             | 687  | 0         | 90.70% | 0.1    | Coil (COILS); IPR020472 (PRINTS); IPR001680 (SMART); IPR006594 (SMART); IPR015943 (G3DSA:2.130.10.GENE3D); IPR001680 (PFAM); IPR006594 (PFAM); PTHR22847 (PANTHER); IPR019775 (PROSITE_PATTERNS); IPR019775 (PROSITE_PATTERNS); IPR019775 (PROSITE_PATTERNS); IPR019775 (PROSITE_PATTERNS); IPR019775 (PROSITE_PATTERNS); IPR019775 (PROSITE_PATTERNS); TRANSMEMBRANE (PHOBIUS); CYTOPLASMIC_DOMAIN (PHOBIUS); NON_CYTOPLASMIC_DOMAIN (PHOBIUS); IPR017986 (PROSITE_PROFILES); IPR001680 (PROSITE_PROFILES); IPR006594 (PROSITE_PROFILES); IPR001680 (PROSITE_PROFILES); IPR001680 (PROSITE_PROFILES); IPR001680 (PROSITE_PROFILES); IPR001680 (PROSITE_PROFILES); IPR017252 (HAMAP); IPR001680 (PROSITE_PROFILES); IPR001680 (PROSITE_PROFILES); IPR017986 (SUPERFAMILY); SSF109925 (SUPERFAMILY) |
| 1542 | c37305_g1_i3_len_2077_path_117_0_1410_1_528_1411_1568_1686_1569_1992_4555_199_3_1993_2110_1994_2076_5 | 352 | lissencephaly-1 homolog                             | 692  | 0         | 90.90% | 0.174  | Coil (COILS); IPR020472 (PRINTS); IPR001680 (SMART); IPR006594 (SMART); IPR015943 (G3DSA:2.130.10.GENE3D); IPR001680 (PFAM); IPR006594 (PFAM); PTHR22847 (PANTHER); IPR019775 (PROSITE_PATTERNS); IPR019775 (PROSITE_PATTERNS); IPR019775 (PROSITE_PATTERNS); IPR019775 (PROSITE_PATTERNS); IPR019775 (PROSITE_PATTERNS); IPR019775 (PROSITE_PATTERNS); TRANSMEMBRANE (PHOBIUS); NON_CYTOPLASMIC_DOMAIN (PHOBIUS); CYTOPLASMIC_DOMAIN (PHOBIUS); IPR001680 (PROSITE_PROFILES); IPR001680 (PROSITE_PROFILES); IPR017986 (PROSITE_PROFILES); IPR001680 (PROSITE_PROFILES); IPR001680 (PROSITE_PROFILES); IPR001680 (PROSITE_PROFILES); IPR001680 (PROSITE_PROFILES); IPR001680 (PROSITE_PROFILES); IPR001680 (PROSITE_PROFILES); IPR017252 (HAMAP); SSF109925 (SUPERFAMILY); IPR017986 (SUPERFAMILY) |

|      |                                                                                                      |     |                                                        |     |           |        |         |                                                                                                                                                                                                                                                                                                                                                                                                                                                                                                                                                                                                                                                                                                                                                                                                                                                                                                            |
|------|------------------------------------------------------------------------------------------------------|-----|--------------------------------------------------------|-----|-----------|--------|---------|------------------------------------------------------------------------------------------------------------------------------------------------------------------------------------------------------------------------------------------------------------------------------------------------------------------------------------------------------------------------------------------------------------------------------------------------------------------------------------------------------------------------------------------------------------------------------------------------------------------------------------------------------------------------------------------------------------------------------------------------------------------------------------------------------------------------------------------------------------------------------------------------------------|
| 1543 | c37321_g3_i1_len_619_path_2095_0_618_0                                                               | 22  | ankyrin repeat and socs box protein 16-like isoform x2 | 207 | 1.97E-89  | 84.10% | 0.101   | IPR002110 (SMART); IPR020683 (G3DSA:1.25.40.GENE3D); IPR002110 (PFAM); IPR020683 (PFAM); IPR020683 (G3DSA:1.25.40.GENE3D); PTHR24133 (PANTHER); IPR002110 (PROSITE_PROFILES); IPR002110 (PROSITE_PROFILES); IPR020683 (PROSITE_PROFILES); IPR020683 (SUPERFAMILY)                                                                                                                                                                                                                                                                                                                                                                                                                                                                                                                                                                                                                                          |
| 1544 | c37334_g2_i1_len_1025_path_6237_0_917_8_419_918_1024_5                                               | 165 | endoplasmic reticulum resident protein 29              | 341 | 3.67E-83  | 72.60% | 0.184   | Coil (COILS); IPR012883 (PFAM); IPR011679 (G3DSA:1.20.1150.GENE3D); IPR012336 (G3DSA:3.40.30.GENE3D); IPR011679 (PFAM); PTHR12211 (PANTHER); PTHR12211:SF0 (PANTHER); IPR012336 (SUPERFAMILY); IPR011679 (SUPERFAMILY)                                                                                                                                                                                                                                                                                                                                                                                                                                                                                                                                                                                                                                                                                     |
| 1545 | c37334_g2_i2_len_1049_path_6237_0_917_7_155_918_1048_5                                               | 181 | endoplasmic reticulum resident protein 29              | 349 | 1.42E-95  | 70.80% | 0.767 Y | Coil (COILS); IPR011679 (PFAM); IPR012883 (PFAM); IPR011679 (G3DSA:1.20.1150.GENE3D); IPR012336 (G3DSA:3.40.30.GENE3D); PTHR12211:SF0 (PANTHER); PTHR12211 (PANTHER); SIGNAL_PEPTIDE (PHOBIUS); NON_CYTOPLASMIC_DOMAIN (PHOBIUS); SIGNAL_PEPTIDE_H_REGION (PHOBIUS); SIGNAL_PEPTIDE_N_REGION (PHOBIUS); SIGNAL_PEPTIDE_C_REGION (PHOBIUS); SignalP-TM (SIGNALP_GRAM_POSITIVE); SignalP-noTM (SIGNALP_GRAM_NEGATIVE); SignalP-noTM (SIGNALP_EUK); IPR012336 (SUPERFAMILY); IPR011679 (SUPERFAMILY)                                                                                                                                                                                                                                                                                                                                                                                                          |
| 1546 | c37376_g3_i1_len_1680_path_4335_0_157_2_040_158_950_69_951_1679_0                                    | 34  | diuretic hormone 44 receptor                           | 560 | 1.58E-126 | 68.30% | 0.202   | IPR002001 (PRINTS); IPR000832 (PRINTS); IPR001879 (SMART); IPR001879 (PFAM); IPR000832 (PFAM); PTHR12011 (PANTHER); NON_CYTOPLASMIC_DOMAIN (PHOBIUS); TRANSMEMBRANE (PHOBIUS); TRANSMEMBRANE (PHOBIUS); NON_CYTOPLASMIC_DOMAIN (PHOBIUS); NON_CYTOPLASMIC_DOMAIN (PHOBIUS); CYTOPLASMIC_DOMAIN (PHOBIUS); TRANSMEMBRANE (PHOBIUS); TRANSMEMBRANE (PHOBIUS); NON_CYTOPLASMIC_DOMAIN (PHOBIUS); TRANSMEMBRANE (PHOBIUS); CYTOPLASMIC_DOMAIN (PHOBIUS); TRANSMEMBRANE (PHOBIUS); CYTOPLASMIC_DOMAIN (PHOBIUS); CYTOPLASMIC_DOMAIN (PHOBIUS); IPR017981 (PROSITE_PROFILES); IPR001879 (PROSITE_PROFILES); SSF111418 (SUPERFAMILY); SSF81321 (SUPERFAMILY); TMhelix (TMHMM); TMhelix (TMHMM); TMhelix (TMHMM); TMhelix (TMHMM); TMhelix (TMHMM); TMhelix (TMHMM)                                                                                                                                                |
| 1547 | c37376_g3_i2_len_1878_path_4335_0_157_2_040_158_950_2832_951_1022_2904_1023_1031_2913_1032_1148_6_0  | 55  | diuretic hormone receptor-like isoform x1              | 626 | 1.75E-152 | 69.30% | 0.202   | IPR002001 (PRINTS); IPR000832 (PRINTS); IPR001879 (SMART); IPR000832 (PFAM); IPR001879 (PFAM); PTHR12011 (PANTHER); NON_CYTOPLASMIC_DOMAIN (PHOBIUS); TRANSMEMBRANE (PHOBIUS); TRANSMEMBRANE (PHOBIUS); TRANSMEMBRANE (PHOBIUS); CYTOPLASMIC_DOMAIN (PHOBIUS); TRANSMEMBRANE (PHOBIUS); TRANSMEMBRANE (PHOBIUS); TRANSMEMBRANE (PHOBIUS); NON_CYTOPLASMIC_DOMAIN (PHOBIUS); NON_CYTOPLASMIC_DOMAIN (PHOBIUS); TRANSMEMBRANE (PHOBIUS); CYTOPLASMIC_DOMAIN (PHOBIUS); CYTOPLASMIC_DOMAIN (PHOBIUS); NON_CYTOPLASMIC_DOMAIN (PHOBIUS); NON_CYTOPLASMIC_DOMAIN (PHOBIUS); TRANSMEMBRANE (PHOBIUS); CYTOPLASMIC_DOMAIN (PHOBIUS); TRANSMEMBRANE (PHOBIUS); IPR001879 (PROSITE_PROFILES); IPR017981 (PROSITE_PROFILES); SSF111418 (SUPERFAMILY); SSF81321 (SUPERFAMILY); TMhelix (TMHMM); TMhelix (TMHMM) |
| 1548 | c37391_g1_i1_len_2514_path_53_0_2513_4                                                               | 671 | laccase 2                                              | 838 | 0         | 62.10% | 0.17    | IPR001117 (PFAM); IPR008972 (G3DSA:2.60.40.GENE3D); IPR011707 (PFAM); IPR008972 (G3DSA:2.60.40.GENE3D); IPR011706 (PFAM); IPR008972 (G3DSA:2.60.40.GENE3D); PTHR11709:SF33 (PANTHER); PTHR11709 (PANTHER); IPR002355 (PROSITE_PATTERNS); NON_CYTOPLASMIC_DOMAIN (PHOBIUS); TRANSMEMBRANE (PHOBIUS); NON_CYTOPLASMIC_DOMAIN (PHOBIUS); TRANSMEMBRANE (PHOBIUS); CYTOPLASMIC_DOMAIN (PHOBIUS); CYTOPLASMIC_DOMAIN (PHOBIUS); TRANSMEMBRANE (PHOBIUS); IPR008972 (SUPERFAMILY); IPR008972 (SUPERFAMILY); IPR008972 (SUPERFAMILY); TMhelix (TMHMM); TMhelix (TMHMM); TMhelix (TMHMM); TMhelix (TMHMM)                                                                                                                                                                                                                                                                                                          |
| 1549 | c37395_g1_i1_len_2866_path_2819_0_2151_4971_2152_2793_5613_2794_2817_5613_2818_2841_5613_2842_2865_1 | 619 | hypoxia up-regulated protein 1 isoform x1              | 955 | 0         | 71.00% | 0.221   | Coil (COILS); Coil (COILS); IPR013126 (PRINTS); G3DSA:3.30.420.40 (GENE3D); IPR029047 (G3DSA:2.60.34.GENE3D); G3DSA:3.30.30.30 (GENE3D); G3DSA:3.30.420.40 (GENE3D); IPR013126 (PFAM); G3DSA:3.90.640.10 (GENE3D); IPR029048 (G3DSA:1.20.1270.GENE3D); PTHR19375 (PANTHER); PTHR19375:SF90 (PANTHER); IPR029048 (SUPERFAMILY); SSF53067 (SUPERFAMILY); SSF53067 (SUPERFAMILY)                                                                                                                                                                                                                                                                                                                                                                                                                                                                                                                              |

|      |                                                                                                       |      |                                                            |     |          |        |       |                                                                                                                                                                                                                                                                                                                                                                                                                                                               |
|------|-------------------------------------------------------------------------------------------------------|------|------------------------------------------------------------|-----|----------|--------|-------|---------------------------------------------------------------------------------------------------------------------------------------------------------------------------------------------------------------------------------------------------------------------------------------------------------------------------------------------------------------------------------------------------------------------------------------------------------------|
| 1550 | c37433_g1_i1_len_2025_path_201_0_118_39_84_119_119_320_120_1631_1830_1632_18_84_114_1885_1912_114_0   | 4666 | phosphoglycerate kinase                                    | 675 | 0        | 87.40% | 0.111 | IPR001576 (PRINTS); IPR015824 (G3DSA:3.40.50.GENE3D); IPR015901 (G3DSA:3.40.50.GENE3D); IPR001576 (PFAM); IPR001576 (PANTHER); PTHR11406:SF6 (PANTHER); IPR015911 (PROSITE_PATTERNS); TRANSMEMBRANE (PHOBIUS); NON_CYTOPLASMIC_DOMAIN (PHOBIUS); CYTOPLASMIC_DOMAIN (PHOBIUS); NON_CYTOPLASMIC_DOMAIN (PHOBIUS); TRANSMEMBRANE (PHOBIUS); IPR001576 (HAMAP); IPR001576 (SUPERFAMILY)                                                                          |
| 1551 | c37490_g1_i1_len_1662_path_1640_0_176_1_817_177_1027_2668_1028_1661_0                                 | 154  | fasciclin-2 isoform x3                                     | 554 | 1.48E-28 | 46.20% | 0.106 | IPR003599 (SMART); IPR003598 (SMART); IPR013783 (G3DSA:2.60.40.GENE3D); IPR013783 (G3DSA:2.60.40.GENE3D); IPR013098 (PFAM); IPR013783 (G3DSA:2.60.40.GENE3D); PTHR10489 (PANTHER); NON_CYTOPLASMIC_DOMAIN (PHOBIUS); TRANSMEMBRANE (PHOBIUS); CYTOPLASMIC_DOMAIN (PHOBIUS); IPR007110 (PROSITE_PROFILES); IPR007110 (PROSITE_PROFILES); IPR007110 (PROSITE_PROFILES); SSF48726 (SUPERFAMILY); SSF48726 (SUPERFAMILY); SSF48726 (SUPERFAMILY); TMhelix (TMHMM) |
| 1552 | c37495_g1_i1_len_380_path_335_0_247_205_248_262_205_263_277_596_278_292_220_293_304_622_305_328_107_1 | 20   | transmembrane protease serine partial                      | 127 | 1.97E-06 | 76.90% | 0.103 | G3DSA:2.40.10.10 (GENE3D); IPR009003 (SUPERFAMILY)                                                                                                                                                                                                                                                                                                                                                                                                            |
| 1553 | c37495_g2_i1_len_389_path_16_0_21_38_22_38_58_39_388_0                                                | 17   | serine protease snake                                      | 130 | 2.25E-10 | 58.70% | 0.16  | G3DSA:2.40.10.10 (GENE3D); G3DSA:2.40.10.10 (GENE3D); IPR001254 (PFAM); PTHR24260 (PANTHER); IPR018114 (PROSITE_PATTERNS); IPR009003 (SUPERFAMILY)                                                                                                                                                                                                                                                                                                            |
| 1554 | c37504_g1_i1_len_725_path_2757_0_125_54_6_126_127_548_128_724_0                                       | 66   | neuroparsin 1 precursor                                    | 242 | 6.01E-19 | 60.60% | 0.252 | IPR010850 (PFAM); IPR011390 (PANTHER); CYTOPLASMIC_DOMAIN (PHOBIUS); NON_CYTOPLASMIC_DOMAIN (PHOBIUS); SIGNAL_PEPTIDE_N_REGION (PHOBIUS); NON_CYTOPLASMIC_DOMAIN (PHOBIUS); TRANSMEMBRANE (PHOBIUS); SIGNAL_PEPTIDE (PHOBIUS); SIGNAL_PEPTIDE_H_REGION (PHOBIUS); SIGNAL_PEPTIDE_C_REGION (PHOBIUS); TRANSMEMBRANE (PHOBIUS); IPR010850 (PRODOM); IPR009030 (SUPERFAMILY); TMhelix (TMHMM); TMhelix (TMHMM)                                                   |
| 1555 | c37504_g1_i2_len_1144_path_1_0_543_545_544_544_546_545_546_548_547_1143_2                             | 99   | neuroparsin 1 precursor                                    | 381 | 1.29E-18 | 61.20% | 0.112 | IPR010850 (PFAM); IPR011390 (PANTHER); NON_CYTOPLASMIC_DOMAIN (PHOBIUS); TRANSMEMBRANE (PHOBIUS); TRANSMEMBRANE (PHOBIUS); NON_CYTOPLASMIC_DOMAIN (PHOBIUS); TRANSMEMBRANE (PHOBIUS); CYTOPLASMIC_DOMAIN (PHOBIUS); CYTOPLASMIC_DOMAIN (PHOBIUS); IPR010850 (PRODOM); IPR009030 (SUPERFAMILY); TMhelix (TMHMM); TMhelix (TMHMM)                                                                                                                               |
| 1556 | c37504_g1_i3_len_737_path_2243_0_139_54_8_140_736_0                                                   | 44   | neuroparsin 1 precursor                                    | 246 | 4.41E-19 | 62.40% | 0.123 | IPR010850 (PFAM); IPR011390 (PANTHER); TRANSMEMBRANE (PHOBIUS); NON_CYTOPLASMIC_DOMAIN (PHOBIUS); CYTOPLASMIC_DOMAIN (PHOBIUS); TRANSMEMBRANE (PHOBIUS); CYTOPLASMIC_DOMAIN (PHOBIUS); TRANSMEMBRANE (PHOBIUS); TRANSMEMBRANE (PHOBIUS); NON_CYTOPLASMIC_DOMAIN (PHOBIUS); NON_CYTOPLASMIC_DOMAIN (PHOBIUS); IPR010850 (PRODOM); IPR009030 (SUPERFAMILY); TMhelix (TMHMM); TMhelix (TMHMM); TMhelix (TMHMM); TMhelix (TMHMM)                                  |
| 1557 | c37507_g2_i1_len_2162_path_4773_0_2135_95_2136_2149_109_2150_2161_4                                   | 201  | PREDICTED: uncharacterized protein LOC105267282 isoform X1 | 721 | 0        | 61.60% | 0.111 | IPR005018 (SMART); IPR005018 (PFAM); PTHR22979:SF15 (PANTHER); PTHR22979 (PANTHER); TRANSMEMBRANE (PHOBIUS); NON_CYTOPLASMIC_DOMAIN (PHOBIUS); CYTOPLASMIC_DOMAIN (PHOBIUS); IPR005018 (PROSITE_PROFILES); IPR005018 (PROSITE_PROFILES); TMhelix (TMHMM)                                                                                                                                                                                                      |
| 1558 | c37522_g2_i1_len_637_path_1859_0_290_21_49_291_311_1200_312_636_5                                     | 288  | hemagglutinin amebocyte aggregation factor-like            | 212 | 6.03E-38 | 60.00% | 0.162 | PF14704 (PFAM); IPR026645 (PANTHER); CYTOPLASMIC_DOMAIN (PHOBIUS); NON_CYTOPLASMIC_DOMAIN (PHOBIUS); TRANSMEMBRANE (PHOBIUS); TMhelix (TMHMM)                                                                                                                                                                                                                                                                                                                 |
| 1559 | c37523_g1_i2_len_549_path_424_0_285_710_286_296_721_297_422_721_423_548_3                             | 25   | ---NA---                                                   | 183 |          |        | 0.105 | PR01217 (PRINTS)                                                                                                                                                                                                                                                                                                                                                                                                                                              |
| 1560 | c37534_g1_i1_len_633_path_875_0_399_127_4_400_408_654_409_460_831_461_503_874_504_632_4               | 22   | zinc finger protein 648                                    | 211 | 1.40E-13 | 63.40% | 0.103 | IPR015880 (SMART); IPR013087 (G3DSA:3.30.160.GENE3D); IPR013087 (G3DSA:3.30.160.GENE3D); PF13465 (PFAM); PTHR24409:SF14 (PANTHER); PTHR24409 (PANTHER); IPR007087 (PROSITE_PATTERNS); IPR007087 (PROSITE_PATTERNS); IPR007087 (PROSITE_PATTERNS); IPR007087 (PROSITE_PATTERNS); IPR007087 (PROSITE_PATTERNS); SSF57667 (SUPERFAMILY); SSF57667 (SUPERFAMILY)                                                                                                  |
| 1561 | c37534_g2_i1_len_307_path_285_0_306_2                                                                 | 3    | zinc finger protein                                        | 102 | 6.82E-17 | 59.00% | 0.104 | IPR015880 (SMART); PF13894 (PFAM); IPR013087 (G3DSA:3.30.160.GENE3D); PF13465 (PFAM); IPR013087 (G3DSA:3.30.160.GENE3D); IPR013087 (G3DSA:3.30.160.GENE3D); PTHR24409:SF13 (PANTHER); PTHR24409 (PANTHER); IPR007087 (PROSITE_PATTERNS); IPR007087 (PROSITE_PATTERNS); IPR007087 (PROSITE_PATTERNS); IPR007087 (PROSITE_PATTERNS); IPR007087 (PROSITE_PATTERNS); SSF57667 (SUPERFAMILY); SSF57667 (SUPERFAMILY)                                               |

|      |                                                                                                       |      |                                                                                          |     |           |        |        |                                                                                                                                                                                                                                                                                                                                                                                                                                                                                                                                                                                                                                                                                                                                                                                                                                                                                                                                                                  |
|------|-------------------------------------------------------------------------------------------------------|------|------------------------------------------------------------------------------------------|-----|-----------|--------|--------|------------------------------------------------------------------------------------------------------------------------------------------------------------------------------------------------------------------------------------------------------------------------------------------------------------------------------------------------------------------------------------------------------------------------------------------------------------------------------------------------------------------------------------------------------------------------------------------------------------------------------------------------------------------------------------------------------------------------------------------------------------------------------------------------------------------------------------------------------------------------------------------------------------------------------------------------------------------|
| 1562 | c37552_g1_i1_len_1743_path_1821_0_126_1948_127_1742_2                                                 | 408  | iron zinc purple acid phosphatase-like protein                                           | 576 | 0         | 73.90% | 0.208  | IPR004843 (PFAM); IPR015914 (G3DSA:2.60.40.GENE3D); IPR029052 (G3DSA:3.60.21.GENE3D); IPR025733 (PFAM); PTHR22953:SF9 (PANTHER); PTHR22953 (PANTHER); IPR008963 (SUPERFAMILY); IPR029052 (SUPERFAMILY)                                                                                                                                                                                                                                                                                                                                                                                                                                                                                                                                                                                                                                                                                                                                                           |
| 1563 | c37552_g1_i2_len_1646_path_3683_0_29_1948_30_1645_1                                                   | 322  | purple acid phosphatase                                                                  | 544 | 0         | 73.60% | 0.848Y | IPR015914 (G3DSA:2.60.40.GENE3D); IPR004843 (PFAM); IPR029052 (G3DSA:3.60.21.GENE3D); IPR025733 (PFAM); PTHR22953:SF9 (PANTHER); PTHR22953 (PANTHER); SignalP-noTM (SIGNALP_EUK); IPR008963 (SUPERFAMILY); IPR029052 (SUPERFAMILY)                                                                                                                                                                                                                                                                                                                                                                                                                                                                                                                                                                                                                                                                                                                               |
|      |                                                                                                       |      |                                                                                          |     |           |        |        | IPR001713 (PRINTS); IPR000010 (SMART); IPR015880 (SMART); PF13894 (PFAM); IPR013087 (G3DSA:3.30.160.GENE3D); IPR007087 (PFAM); G3DSA:3.10.450.10 (GENE3D); IPR013087 (G3DSA:3.30.160.GENE3D); IPR013087 (G3DSA:3.30.160.GENE3D); PF13465 (PFAM); IPR000010 (PFAM); PTHR24409 (PANTHER); PTHR24409:SF14 (PANTHER); IPR007087 (PROSITE_PATTERNS); IPR007087 (PROSITE_PATTERNS); IPR007087 (PROSITE_PATTERNS); IPR007087 (PROSITE_PATTERNS); IPR018073 (PROSITE_PATTERNS); IPR007087 (PROSITE_PATTERNS); IPR007087 (PROSITE_PATTERNS); IPR007087 (PROSITE_PATTERNS); IPR007087 (PROSITE_PROFILES); SSF57667 (SUPERFAMILY); SSF57667 (SUPERFAMILY); SSF57667 (SUPERFAMILY); SSF54403 (SUPERFAMILY); SSF57667 (SUPERFAMILY); SSF57667 (SUPERFAMILY) |
| 1564 | c37574_g1_i1_len_2700_path_1_0_128_130_129_2699_1                                                     | 1065 | gastrula zinc finger                                                                     | 900 | 8.02E-52  | 51.80% | 0.102  | IPR000436 (SMART); G3DSA:2.10.70.10 (GENE3D); G3DSA:2.10.70.10 (GENE3D); IPR000436 (PFAM); G3DSA:2.10.70.10 (GENE3D); PTHR19325 (PANTHER); IPR000436 (PROSITE_PROFILES); IPR000436 (PROSITE_PROFILES); IPR000436 (PROSITE_PROFILES); IPR000436 (SUPERFAMILY); IPR000436 (SUPERFAMILY); IPR000436 (SUPERFAMILY)                                                                                                                                                                                                                                                                                                                                                                                                                                                                                                                                                                                                                                                   |
| 1565 | c37580_g1_i1_len_1411_path_206_0_27_234_28_91_298_92_94_298_95_97_298_98_100_298_101_103_298_104_10_4 | 1124 | von willebrand factor type egf and pentraxin domain-containing protein 1-like isoform x1 | 470 | 1.60E-12  | 42.80% | 0.101  | IPR000436 (SMART); G3DSA:2.10.70.10 (GENE3D); G3DSA:2.10.70.10 (GENE3D); IPR000436 (PFAM); G3DSA:2.10.70.10 (GENE3D); PTHR19325 (PANTHER); IPR000436 (PROSITE_PROFILES); IPR000436 (PROSITE_PROFILES); IPR000436 (SUPERFAMILY); IPR000436 (SUPERFAMILY); IPR000436 (SUPERFAMILY)                                                                                                                                                                                                                                                                                                                                                                                                                                                                                                                                                                                                                                                                                 |
| 1566 | c37580_g1_i2_len_1454_path_1_0_204_206_205_232_1560_233_267_1186_268_297_1216_298_311_1230_312_351_4  | 1382 | von willebrand factor type egf and pentraxin domain-containing protein 1-like            | 485 | 2.29E-13  | 40.00% | 0.101  | IPR000436 (SMART); G3DSA:2.10.70.10 (GENE3D); G3DSA:2.10.70.10 (GENE3D); IPR000436 (PFAM); G3DSA:2.10.70.10 (GENE3D); PTHR19325 (PANTHER); IPR000436 (PROSITE_PROFILES); IPR000436 (PROSITE_PROFILES); IPR000436 (PROSITE_PROFILES); IPR000436 (SUPERFAMILY); IPR000436 (SUPERFAMILY); IPR000436 (SUPERFAMILY)                                                                                                                                                                                                                                                                                                                                                                                                                                                                                                                                                                                                                                                   |
| 1567 | c37585_g1_i2_len_1534_path_807_0_45_118_46_286_2215_287_1153_3081_1154_1171_990_1172_1533_0           | 549  | sparc                                                                                    | 512 | 2.26E-114 | 77.30% | 0.287  | Coil (COILS); Coil (COILS); IPR003645 (SMART); IPR019577 (PFAM); G3DSA:3.30.60.30 (GENE3D); IPR011992 (G3DSA:1.10.238.GENE3D); PTHR13866 (PANTHER); PTHR13866:SF14 (PANTHER); IPR018247 (PROSITE_PATTERNS); IPR001999 (PROSITE_PATTERNS); CYTOPLASMIC_DOMAIN (PHOBIUS); NON_CYTOPLASMIC_DOMAIN (PHOBIUS); TRANSMEMBRANE (PHOBIUS); NON_CYTOPLASMIC_DOMAIN (PHOBIUS); TRANSMEMBRANE (PHOBIUS); SSF100895 (SUPERFAMILY); SSF47473 (SUPERFAMILY); TMhelix (TMHMM); TMhelix (TMHMM)                                                                                                                                                                                                                                                                                                                                                                                                                                                                                  |
| 1568 | c37626_g4_i1_len_2798_path_4489_0_555_5043_556_2797_1                                                 | 338  | thromboxane a synthase-like protein                                                      | 933 | 5.22E-139 | 59.60% | 0.192  | IPR001128 (PRINTS); IPR002401 (PRINTS); IPR001128 (G3DSA:1.10.630.GENE3D); IPR001128 (PFAM); PTHR24292:SF24 (PANTHER); PTHR24292 (PANTHER); IPR017972 (PROSITE_PATTERNS); TRANSMEMBRANE (PHOBIUS); TRANSMEMBRANE (PHOBIUS); CYTOPLASMIC_DOMAIN (PHOBIUS); TRANSMEMBRANE (PHOBIUS); NON_CYTOPLASMIC_DOMAIN (PHOBIUS); NON_CYTOPLASMIC_DOMAIN (PHOBIUS); TRANSMEMBRANE (PHOBIUS); CYTOPLASMIC_DOMAIN (PHOBIUS); NON_CYTOPLASMIC_DOMAIN (PHOBIUS); IPR001128 (SUPERFAMILY); TMhelix (TMHMM)                                                                                                                                                                                                                                                                                                                                                                                                                                                                         |



|      |                                                                                                       |      |                                                                                                                                         |     |           |        |       |                                                                                                                                                                                                                                                                                                                                                                                                                                                                                                                                                                                              |
|------|-------------------------------------------------------------------------------------------------------|------|-----------------------------------------------------------------------------------------------------------------------------------------|-----|-----------|--------|-------|----------------------------------------------------------------------------------------------------------------------------------------------------------------------------------------------------------------------------------------------------------------------------------------------------------------------------------------------------------------------------------------------------------------------------------------------------------------------------------------------------------------------------------------------------------------------------------------------|
| 1569 | c37654_g1_i1_len_1824_path_4433_0_158_4_592_159_1688_6122_1689_1713_6296_1714_1823_1                  | 118  | sodium calcium exchanger partial                                                                                                        | 608 | 1.70E-173 | 78.30% | 0.104 | IPR004836 (PRINTS); IPR003644 (SMART); IPR004837 (PFAM); IPR003644 (PFAM); PTHR11878 (PANTHER); CYTOPLASMIC_DOMAIN (PHOBIUS); TRANSMEMBRANE (PHOBIUS); NON_CYTOPLASMIC_DOMAIN (PHOBIUS); TRANSMEMBRANE (PHOBIUS); TRANSMEMBRANE (PHOBIUS); NON_CYTOPLASMIC_DOMAIN (PHOBIUS); NON_CYTOPLASMIC_DOMAIN (PHOBIUS); CYTOPLASMIC_DOMAIN (PHOBIUS); CYTOPLASMIC_DOMAIN (PHOBIUS); TRANSMEMBRANE (PHOBIUS); NON_CYTOPLASMIC_DOMAIN (PHOBIUS); TRANSMEMBRANE (PHOBIUS); SSF141072 (SUPERFAMILY); TMhelix (TMHMM); TMhelix (TMHMM); TMhelix (TMHMM); TMhelix (TMHMM); TMhelix (TMHMM); TMhelix (TMHMM) |
| 1570 | c37654_g1_i2_len_1817_path_4433_0_158_4_592_159_1688_6122_1689_1713_6147_1714_1791_6122_1792_1816_1   | 158  | sodium calcium exchanger partial                                                                                                        | 606 | 4.75E-173 | 78.30% | 0.104 | IPR004836 (PRINTS); IPR003644 (SMART); IPR004837 (PFAM); IPR003644 (PFAM); PTHR11878 (PANTHER); NON_CYTOPLASMIC_DOMAIN (PHOBIUS); NON_CYTOPLASMIC_DOMAIN (PHOBIUS); TRANSMEMBRANE (PHOBIUS); CYTOPLASMIC_DOMAIN (PHOBIUS); TRANSMEMBRANE (PHOBIUS); NON_CYTOPLASMIC_DOMAIN (PHOBIUS); TRANSMEMBRANE (PHOBIUS); CYTOPLASMIC_DOMAIN (PHOBIUS); CYTOPLASMIC_DOMAIN (PHOBIUS); TRANSMEMBRANE (PHOBIUS); NON_CYTOPLASMIC_DOMAIN (PHOBIUS); SSF141072 (SUPERFAMILY); TMhelix (TMHMM); TMhelix (TMHMM); TMhelix (TMHMM); TMhelix (TMHMM); TMhelix (TMHMM); TMhelix (TMHMM)                          |
| 1571 | c37665_g1_i1_len_1388_path_129_0_249_37_7_250_1387_1                                                  | 1693 | cphe_pseag ame: full=cyanophycinase ame: full=extracellular cgpase short=cphepa ame: full=extracellular cyanophycinase flags: precursor | 463 | 1.82E-85  | 51.10% | 0.246 | IPR005320 (PFAM); IPR029062 (G3DSA:3.40.50.GENE3D); IPR029062 (SUPERFAMILY); TMhelix (TMHMM)                                                                                                                                                                                                                                                                                                                                                                                                                                                                                                 |
| 1572 | c37665_g1_i2_len_1415_path_129_0_249_29_10_250_276_377_277_1414_1                                     | 1336 | cphe_pseag ame: full=cyanophycinase ame: full=extracellular cgpase short=cphepa ame: full=extracellular cyanophycinase flags: precursor | 472 | 6.24E-83  | 50.40% | 0.246 | IPR029062 (G3DSA:3.40.50.GENE3D); IPR005320 (PFAM); IPR029062 (SUPERFAMILY); TMhelix (TMHMM)                                                                                                                                                                                                                                                                                                                                                                                                                                                                                                 |
| 1573 | c37670_g1_i1_len_227_path_166_0_13_180_14_24_287_25_40_303_41_76_303_77_112_1045_113_192_72_193_226_4 | 27   | 3d domain protein                                                                                                                       | 76  | 8.96E-09  | 60.80% | 0.105 | no IPS match                                                                                                                                                                                                                                                                                                                                                                                                                                                                                                                                                                                 |
| 1574 | c37670_g1_i2_len_263_path_166_0_13_180_14_24_287_25_40_303_41_76_303_77_112_303_113_148_1045_149_22_4 | 213  | carbohydrate-binding module family 48 protein                                                                                           | 88  | 9.32E-12  | 60.70% | 0.105 | no IPS match                                                                                                                                                                                                                                                                                                                                                                                                                                                                                                                                                                                 |
| 1575 | c37681_g2_i1_len_1354_path_1_0_1190_119_2_1191_1271_3973_1272_1274_3977_1275_1353_1                   | 179  | prolyl 3-hydroxylase partial                                                                                                            | 451 | 6.67E-122 | 66.30% | 0.255 | IPR011990 (G3DSA:1.25.40.GENE3D); PTHR13986 (PANTHER); PTHR13986:SF8 (PANTHER); TRANSMEMBRANE (PHOBIUS); NON_CYTOPLASMIC_DOMAIN (PHOBIUS); CYTOPLASMIC_DOMAIN (PHOBIUS)                                                                                                                                                                                                                                                                                                                                                                                                                      |
| 1576 | c37681_g2_i2_len_1463_path_1_0_1190_362_6_1191_1462_1                                                 | 155  | prolyl 3-hydroxylase partial                                                                                                            | 488 | 4.61E-127 | 65.40% | 0.255 | Coil (COILS); IPR011990 (G3DSA:1.25.40.GENE3D); PTHR13986:SF8 (PANTHER); PTHR13986 (PANTHER); CYTOPLASMIC_DOMAIN (PHOBIUS); TRANSMEMBRANE (PHOBIUS); NON_CYTOPLASMIC_DOMAIN (PHOBIUS)                                                                                                                                                                                                                                                                                                                                                                                                        |
| 1577 | c37684_g2_i1_len_1784_path_3448_0_1783_5                                                              | 110  | wd repeat-containing protein 61                                                                                                         | 594 | 3.32E-172 | 81.70% | 0.104 | IPR001680 (SMART); IPR015943 (G3DSA:2.130.10.GENE3D); IPR001680 (PFAM); IPR015943 (G3DSA:2.130.10.GENE3D); PTHR22841 (PANTHER); IPR019775 (PROSITE_PATTERNS); IPR001680 (PROSITE_PROFILES); IPR001680 (PROSITE_PROFILES); IPR001680 (PROSITE_PROFILES); IPR001680 (PROSITE_PROFILES); IPR017986 (SUPERFAMILY)                                                                                                                                                                                                                                                                                |
| 1578 | c37720_g1_i1_len_598_path_1731_0_597_5                                                                | 116  | serine protease hepsin                                                                                                                  | 199 | 4.46E-09  | 66.40% | 0.11  | IPR001254 (PFAM); G3DSA:2.40.10.10 (GENE3D); PTHR24265 (PANTHER); IPR009003 (SUPERFAMILY)                                                                                                                                                                                                                                                                                                                                                                                                                                                                                                    |
| 1579 | c37720_g3_i1_len_861_path_2331_0_189_10_58_190_860_4                                                  | 115  | transmembrane protease serine partial                                                                                                   | 287 | 6.22E-34  | 51.00% | 0.323 | IPR001314 (PRINTS); IPR001254 (SMART); G3DSA:2.40.10.10 (GENE3D); G3DSA:2.40.10.10 (GENE3D); IPR001254 (PFAM); G3DSA:2.40.10.10 (GENE3D); PTHR24265 (PANTHER); IPR018114 (PROSITE_PATTERNS); IPR001254 (PROSITE_PROFILES); IPR009003 (SUPERFAMILY)                                                                                                                                                                                                                                                                                                                                           |
| 1580 | c37720_g3_i2_len_1131_path_2331_0_189_7_88_190_459_1058_460_1130_4                                    | 116  | transmembrane protease serine 2-like                                                                                                    | 377 | 2.86E-18  | 52.80% | 0.323 | IPR001314 (PRINTS); IPR001254 (SMART); G3DSA:2.40.10.10 (GENE3D); G3DSA:2.40.10.10 (GENE3D); IPR001254 (PFAM); G3DSA:2.40.10.10 (GENE3D); PTHR24265 (PANTHER); IPR018114 (PROSITE_PATTERNS); IPR001254 (PROSITE_PROFILES); IPR009003 (SUPERFAMILY)                                                                                                                                                                                                                                                                                                                                           |

|      |                                                                                        |       |                                                     |      |           |        |         |                                                                                                                                                                                                                                                                                                                                                                                                                                                                                                                                                                                                                                                                                                                                                                                                                                           |
|------|----------------------------------------------------------------------------------------|-------|-----------------------------------------------------|------|-----------|--------|---------|-------------------------------------------------------------------------------------------------------------------------------------------------------------------------------------------------------------------------------------------------------------------------------------------------------------------------------------------------------------------------------------------------------------------------------------------------------------------------------------------------------------------------------------------------------------------------------------------------------------------------------------------------------------------------------------------------------------------------------------------------------------------------------------------------------------------------------------------|
| 1581 | c37725_g1_i1_len_2184_path_105_0_405_51_1_406_2183_1                                   | 484   | probable chitinase 3                                | 728  | 4.68E-133 | 57.40% | 0.112   | IPR011583 (SMART); IPR002557 (SMART); IPR002557 (G3DSA:2.170.140.GENE3D); IPR029070 (G3DSA:3.10.50.GENE3D); IPR013781 (G3DSA:3.20.20.GENE3D); IPR002557 (PFAM); IPR001223 (PFAM); PTHR11177 (PANTHER); PTHR11177:SF112 (PANTHER); IPR001579 (PROSITE_PATTERNS); TRANSMEMBRANE (PHOBIUS); CYTOPLASMIC_DOMAIN (PHOBIUS); NON_CYTOPLASMIC_DOMAIN (PHOBIUS); TRANSMEMBRANE (PHOBIUS); TRANSMEMBRANE (PHOBIUS); CYTOPLASMIC_DOMAIN (PHOBIUS); IPR002557 (PROSITE_PROFILES); IPR017853 (SUPERFAMILY); IPR002557 (SUPERFAMILY); IPR029070 (SUPERFAMILY); TMhelix (TMHMM); TMhelix (TMHMM); TMhelix (TMHMM); TMhelix (TMHMM)                                                                                                                                                                                                                      |
| 1582 | c37726_g1_i1_len_1490_path_1617_0_99_32_0_100_224_448_225_536_760_537_1489_0           | 260   | venom protease-like                                 | 497  | 8.39E-113 | 58.70% | 0.163   | IPR001314 (PRINTS); IPR001254 (SMART); IPR006604 (SMART); IPR001254 (PFAM); G3DSA:2.40.10.10 (GENE3D); IPR022700 (PFAM); G3DSA:2.40.10.10 (GENE3D); PTHR24268 (PANTHER); PTHR24268:SF97 (PANTHER); IPR018114 (PROSITE_PATTERNS); IPR018114 (PROSITE_PATTERNS); CYTOPLASMIC_DOMAIN (PHOBIUS); TRANSMEMBRANE (PHOBIUS); NON_CYTOPLASMIC_DOMAIN (PHOBIUS); IPR001254 (PROSITE_PROFILES); IPR009003 (SUPERFAMILY); TMhelix (TMHMM)                                                                                                                                                                                                                                                                                                                                                                                                            |
| 1583 | c37726_g1_i2_len_1660_path_53_0_266_320_267_391_445_392_394_448_395_706_760_707_1659_2 | 286   | venom protease-like                                 | 553  | 1.45E-111 | 58.70% | 0.129   | IPR001314 (PRINTS); IPR001254 (SMART); IPR006604 (SMART); G3DSA:2.40.10.10 (GENE3D); IPR022700 (PFAM); IPR001254 (PFAM); G3DSA:2.40.10.10 (GENE3D); PTHR24268 (PANTHER); PTHR24268:SF97 (PANTHER); IPR018114 (PROSITE_PATTERNS); IPR018114 (PROSITE_PATTERNS); TRANSMEMBRANE (PHOBIUS); CYTOPLASMIC_DOMAIN (PHOBIUS); TRANSMEMBRANE (PHOBIUS); NON_CYTOPLASMIC_DOMAIN (PHOBIUS); NON_CYTOPLASMIC_DOMAIN (PHOBIUS); IPR001254 (PROSITE_PROFILES); IPR009003 (SUPERFAMILY); TMhelix (TMHMM); TMhelix (TMHMM)                                                                                                                                                                                                                                                                                                                                |
| 1584 | c37727_g1_i1_len_1657_path_1734_0_1039_2774_1040_1048_2783_1049_1174_3523_11_75_1656_2 | 458   | 46 kda fk506-binding nuclear protein                | 552  | 6.42E-47  | 73.40% | 0.454 Y | Coil (COILS); G3DSA:3.10.50.40 (GENE3D); IPR001179 (PFAM); IPR023566 (PANTHER); IPR001179 (PROSITE_PROFILES); SignalP-noTM (SIGNALP_EUK); IPR024057 (SUPERFAMILY); SSF54534 (SUPERFAMILY)                                                                                                                                                                                                                                                                                                                                                                                                                                                                                                                                                                                                                                                 |
| 1585 | c37781_g2_i1_len_8422_path_8225_0_1783_5822_1784_4331_5822_4332_6879_1564_68_80_8421_3 | 1169  | centrosomin-like protein                            | 2808 | 2.26E-86  | 51.40% | 0.226   | Coil (COILS); IPR012943 (PFAM); PTHR13895:SF14 (PANTHER); PTHR13895 (PANTHER)                                                                                                                                                                                                                                                                                                                                                                                                                                                                                                                                                                                                                               |
| 1586 | c37803_g1_i1_len_9545_path_1_0_9544_3                                                  | 43640 | low quality protein: hemocytin-like                 | 3182 | 3.07E-65  | 39.70% | 0.415 Y | IPR001846 (SMART); IPR014853 (SMART); PTHR11339 (PANTHER); PTHR11339:SF25 (PANTHER); IPR001007 (PROSITE_PATTERNS); IPR001007 (PROSITE_PATTERNS); TRANSMEMBRANE (PHOBIUS); CYTOPLASMIC_DOMAIN (PHOBIUS); CYTOPLASMIC_DOMAIN (PHOBIUS); TRANSMEMBRANE (PHOBIUS); NON_CYTOPLASMIC_DOMAIN (PHOBIUS); IPR006207 (PROSITE_PROFILES); IPR001846 (PROSITE_PROFILES); IPR001846 (PROSITE_PROFILES); IPR002919 (SUPERFAMILY); TMhelix (TMHMM)                                                                                                                                                                                                                                                                                                                                                                                                       |
| 1587 | c37804_g2_i1_len_3488_path_3818_0_1638_5455_1639_3487_2                                | 565   | cadherin egf lag seven-pass g-type receptor partial | 1162 | 5.00E-107 | 42.60% | 0.303   | IPR000203 (SMART); IPR000203 (PFAM); IPR000832 (PFAM); IPR022624 (PFAM); PTHR12011:SF74 (PANTHER); PTHR12011 (PANTHER); CYTOPLASMIC_DOMAIN (PHOBIUS); TRANSMEMBRANE (PHOBIUS); TRANSMEMBRANE (PHOBIUS); TRANSMEMBRANE (PHOBIUS); CYTOPLASMIC_DOMAIN (PHOBIUS); CYTOPLASMIC_DOMAIN (PHOBIUS); TRANSMEMBRANE (PHOBIUS); NON_CYTOPLASMIC_DOMAIN (PHOBIUS); TRANSMEMBRANE (PHOBIUS); TRANSMEMBRANE (PHOBIUS); CYTOPLASMIC_DOMAIN (PHOBIUS); NON_CYTOPLASMIC_DOMAIN (PHOBIUS); NON_CYTOPLASMIC_DOMAIN (PHOBIUS); NON_CYTOPLASMIC_DOMAIN (PHOBIUS); TRANSMEMBRANE (PHOBIUS); TRANSMEMBRANE (PHOBIUS); TRANSMEMBRANE (PHOBIUS); TRANSMEMBRANE (PHOBIUS); NON_CYTOPLASMIC_DOMAIN (PHOBIUS); SSF81321 (SUPERFAMILY); IPR013320 (SUPERFAMILY); TMhelix (TMHMM); TMhelix (TMHMM); TMhelix (TMHMM); TMhelix (TMHMM); TMhelix (TMHMM); TMhelix (TMHMM) |

|      |                                                                                                         |      |                                      |     |          |        |         |                                                                                                                                                                                                                                                                                                                                                                                                                                                                                                                                                                                                                                                                                                                                                                                                                                                                                                                             |
|------|---------------------------------------------------------------------------------------------------------|------|--------------------------------------|-----|----------|--------|---------|-----------------------------------------------------------------------------------------------------------------------------------------------------------------------------------------------------------------------------------------------------------------------------------------------------------------------------------------------------------------------------------------------------------------------------------------------------------------------------------------------------------------------------------------------------------------------------------------------------------------------------------------------------------------------------------------------------------------------------------------------------------------------------------------------------------------------------------------------------------------------------------------------------------------------------|
| 1588 | c37815_g1_i1_len_2027_path_105_0_2026_4                                                                 | 266  | btb poz domain-containing protein 17 | 676 | 0        | 75.30% | 0.28    | IPR000210 (SMART); IPR011705 (SMART); IPR013069 (PFAM); IPR011705 (PFAM); G3DSA:3.30.710.10 (GENE3D); PTHR24410:SF9 (PANTHER); PTHR24410 (PANTHER); TRANSMEMBRANE (PHOBIUS); NON_CYTOPLASMIC_DOMAIN (PHOBIUS); CYTOPLASMIC_DOMAIN (PHOBIUS); IPR000210 (PROSITE_PROFILES); IPR011333 (SUPERFAMILY); TMhelix (TMHMM)                                                                                                                                                                                                                                                                                                                                                                                                                                                                                                                                                                                                         |
| 1589 | c37821_g1_i1_len_2827_path_3361_0_222_4_42_223_2207_5568_2208_2216_6971_2217_2231_6986_2232_2241_635_0  | 3341 | plasma alpha-l-fucosidase            | 943 | 0        | 78.10% | 0.705 Y | IPR016286 (PRINTS); IPR000933 (SMART); IPR000933 (PFAM); IPR013780 (G3DSA:2.60.40.GENE3D); IPR013781 (G3DSA:3.20.20.GENE3D); IPR000933 (PANTHER); PTHR10030:SF26 (PANTHER); IPR018526 (PROSITE_PATTERNS); CYTOPLASMIC_DOMAIN (PHOBIUS); CYTOPLASMIC_DOMAIN (PHOBIUS); NON_CYTOPLASMIC_DOMAIN (PHOBIUS); SIGNAL_PEPTIDE_N_REGION (PHOBIUS); SIGNAL_PEPTIDE (PHOBIUS); NON_CYTOPLASMIC_DOMAIN (PHOBIUS); TRANSMEMBRANE (PHOBIUS); NON_CYTOPLASMIC_DOMAIN (PHOBIUS); CYTOPLASMIC_DOMAIN (PHOBIUS); TRANSMEMBRANE (PHOBIUS); SIGNAL_PEPTIDE_C_REGION (PHOBIUS); TRANSMEMBRANE (PHOBIUS); SIGNAL_PEPTIDE_H_REGION (PHOBIUS); TRANSMEMBRANE (PHOBIUS); TRANSMEMBRANE (PHOBIUS); CYTOPLASMIC_DOMAIN (PHOBIUS); NON_CYTOPLASMIC_DOMAIN (PHOBIUS); SignalP-noTM (SIGNALP_EUK); IPR017853 (SUPERFAMILY); TMhelix (TMHMM); TMhelix (TMHMM); TMhelix (TMHMM); TMhelix (TMHMM); TMhelix (TMHMM)                                          |
| 1590 | c37821_g1_i2_len_2824_path_222_0_219_44_2_220_2204_5568_2205_2213_6971_2214_2_228_6986_2229_2238_6355_0 | 3046 | plasma alpha-l-fucosidase            | 942 | 0        | 78.80% | 0.414 Y | IPR016286 (PRINTS); IPR000933 (SMART); IPR000933 (PFAM); IPR013781 (G3DSA:3.20.20.GENE3D); IPR013780 (G3DSA:2.60.40.GENE3D); IPR000933 (PANTHER); PTHR10030:SF26 (PANTHER); IPR018526 (PROSITE_PATTERNS); NON_CYTOPLASMIC_DOMAIN (PHOBIUS); NON_CYTOPLASMIC_DOMAIN (PHOBIUS); CYTOPLASMIC_DOMAIN (PHOBIUS); TRANSMEMBRANE (PHOBIUS); NON_CYTOPLASMIC_DOMAIN (PHOBIUS); TRANSMEMBRANE (PHOBIUS); CYTOPLASMIC_DOMAIN (PHOBIUS); TRANSMEMBRANE (PHOBIUS); NON_CYTOPLASMIC_DOMAIN (PHOBIUS); TRANSMEMBRANE (PHOBIUS); TRANSMEMBRANE (PHOBIUS); TRANSMEMBRANE (PHOBIUS); NON_CYTOPLASMIC_DOMAIN (PHOBIUS); CYTOPLASMIC_DOMAIN (PHOBIUS); CYTOPLASMIC_DOMAIN (PHOBIUS); TRANSMEMBRANE (PHOBIUS); TRANSMEMBRANE (PHOBIUS); TRANSMEMBRANE (PHOBIUS); CYTOPLASMIC_DOMAIN (PHOBIUS); SignalP-TM (SIGNALP_GRAM_POSITIVE); IPR017853 (SUPERFAMILY); TMhelix (TMHMM); TMhelix (TMHMM); TMhelix (TMHMM); TMhelix (TMHMM); TMhelix (TMHMM) |
| 1591 | c37827_g1_i1_len_1768_path_1846_0_1767_2                                                                | 1992 | cytosolic non-specific dipeptidase   | 589 | 0        | 81.50% | 0.142   | IPR011650 (PFAM); G3DSA:3.40.630.10 (GENE3D); IPR011650 (G3DSA:3.30.70.GENE3D); IPR002933 (PFAM); PTHR11014:SF51 (PANTHER); PTHR11014 (PANTHER); IPR001261 (PROSITE_PATTERNS); CYTOPLASMIC_DOMAIN (PHOBIUS); NON_CYTOPLASMIC_DOMAIN (PHOBIUS); TRANSMEMBRANE (PHOBIUS); SSF53187 (SUPERFAMILY); TMhelix (TMHMM)                                                                                                                                                                                                                                                                                                                                                                                                                                                                                                                                                                                                             |
| 1592 | c37858_g1_i1_len_1286_path_53_0_756_810_757_793_4658_794_1285_5                                         | 968  | contactin associated protein         | 428 | 1.94E-19 | 50.30% | 0.189   | Coil (COILS); IPR014716 (G3DSA:3.90.215.GENE3D); IPR001073 (PFAM); IPR002181 (PFAM); IPR008983 (G3DSA:2.60.120.GENE3D); PTHR22923 (PANTHER); PTHR22923:SF49 (PANTHER); NON_CYTOPLASMIC_DOMAIN (PHOBIUS); CYTOPLASMIC_DOMAIN (PHOBIUS); TRANSMEMBRANE (PHOBIUS); TRANSMEMBRANE (PHOBIUS); CYTOPLASMIC_DOMAIN (PHOBIUS); IPR001073 (PROSITE_PROFILES); IPR002181 (SUPERFAMILY); IPR008983 (SUPERFAMILY); TMhelix (TMHMM)                                                                                                                                                                                                                                                                                                                                                                                                                                                                                                      |
| 1593 | c37861_g1_i1_len_1081_path_1349_0_994_7_1_995_1080_4                                                    | 144  | superoxide dismutase                 | 360 | 4.40E-63 | 67.80% | 0.113   | IPR001424 (PRINTS); IPR001424 (G3DSA:2.60.40.GENE3D); IPR001424 (PFAM); IPR001424 (G3DSA:2.60.40.GENE3D); PTHR10003 (PANTHER); IPR018152 (PROSITE_PATTERNS); IPR018152 (PROSITE_PATTERNS); IPR001424 (SUPERFAMILY); IPR001424 (SUPERFAMILY)                                                                                                                                                                                                                                                                                                                                                                                                                                                                                                                                                                                                                                                                                 |
| 1594 | c37861_g1_i2_len_1154_path_1349_0_994_2_342_995_1077_23_1078_1153_5                                     | 224  | superoxide dismutase                 | 384 | 1.21E-63 | 68.70% | 0.189   | IPR001424 (PRINTS); IPR001424 (PFAM); IPR001424 (G3DSA:2.60.40.GENE3D); IPR001424 (G3DSA:2.60.40.GENE3D); PTHR10003 (PANTHER); IPR018152 (PROSITE_PATTERNS); IPR018152 (PROSITE_PATTERNS); CYTOPLASMIC_DOMAIN (PHOBIUS); TRANSMEMBRANE (PHOBIUS); NON_CYTOPLASMIC_DOMAIN (PHOBIUS); SignalP-TM (SIGNALP_GRAM_POSITIVE); IPR001424 (SUPERFAMILY); IPR001424 (SUPERFAMILY); TMhelix (TMHMM)                                                                                                                                                                                                                                                                                                                                                                                                                                                                                                                                   |

|      |                                                                                                 |      |                                                       |      |           |        |        |                                                                                                                                                                                                                                                                                                                                                                                                                                                                                                                                                                                                      |
|------|-------------------------------------------------------------------------------------------------|------|-------------------------------------------------------|------|-----------|--------|--------|------------------------------------------------------------------------------------------------------------------------------------------------------------------------------------------------------------------------------------------------------------------------------------------------------------------------------------------------------------------------------------------------------------------------------------------------------------------------------------------------------------------------------------------------------------------------------------------------------|
| 1595 | c37876_g1_i1_len_3999_path_1_0_94_96_95_113_115_114_1884_1886_1885_2072_2074_2073_3998_0        | 839  | sucrase- intestinal-like                              | 1333 | 0         | 61.60% | 0.122  | IPR000322 (PFAM); PTHR22762:SF7 (PANTHER); PTHR22762 (PANTHER); IPR030458 (PROSITE_PATTERNS); IPR030459 (PROSITE_PATTERNS); TRANSMEMBRANE (PHOBIUS); NON_CYTOPLASMIC_DOMAIN (PHOBIUS); TRANSMEMBRANE (PHOBIUS); CYTOPLASMIC_DOMAIN (PHOBIUS); CYTOPLASMIC_DOMAIN (PHOBIUS); TRANSMEMBRANE (PHOBIUS); NON_CYTOPLASMIC_DOMAIN (PHOBIUS); IPR017853 (SUPERFAMILY); SSF51011 (SUPERFAMILY); IPR011013 (SUPERFAMILY); TMhelix (TMHMM)                                                                                                                                                                     |
| 1596 | c37880_g1_i1_len_600_path_1047_0_2_1050_3_42_1787_43_160_1208_161_314_205_315_469_360_470_599_4 | 17   | zinc finger protein 420-like                          | 200  | 9.95E-29  | 57.40% | 0.098  | IPR015880 (SMART); IPR013087 (G3DSA:3.30.160.GENE3D); PF13912 (PFAM); IPR013087 (G3DSA:3.30.160.GENE3D); IPR007087 (PFAM); PF13465 (PFAM); PTHR24409 (PANTHER); PTHR24409:SF13 (PANTHER); IPR007087 (PROSITE_PATTERNS); IPR007087 (PROSITE_PATTERNS); IPR007087 (PROSITE_PATTERNS); IPR007087 (PROSITE_PATTERNS); IPR007087 (PROSITE_PROFILES); IPR007087 (PROSITE_PROFILES); IPR007087 (PROSITE_PROFILES); IPR007087 (PROSITE_PROFILES); IPR007527 (PROSITE_PROFILES); IPR007087 (PROSITE_PROFILES); SSF57667 (SUPERFAMILY); SSF57667 (SUPERFAMILY); SSF57667 (SUPERFAMILY); SSF57667 (SUPERFAMILY) |
| 1597 | c37880_g1_i2_len_560_path_1090_0_117_1208_118_271_1359_272_429_360_430_559_4                    | 21   | zinc finger protein 420-like                          | 187  | 7.64E-30  | 58.80% | 0.098  | IPR015880 (SMART); IPR013087 (G3DSA:3.30.160.GENE3D); IPR013087 (G3DSA:3.30.160.GENE3D); PF13465 (PFAM); PF13912 (PFAM); PTHR24409:SF13 (PANTHER); PTHR24409 (PANTHER); IPR007087 (PROSITE_PATTERNS); IPR007087 (PROSITE_PATTERNS); IPR007087 (PROSITE_PATTERNS); IPR007087 (PROSITE_PATTERNS); IPR007527 (PROSITE_PROFILES); IPR007087 (PROSITE_PROFILES); IPR007087 (PROSITE_PROFILES); IPR007087 (PROSITE_PROFILES); IPR007087 (PROSITE_PROFILES); IPR007087 (PROSITE_PROFILES); SSF57667 (SUPERFAMILY); SSF57667 (SUPERFAMILY); SSF57667 (SUPERFAMILY)                                           |
| 1600 | c3794_g1_i1_len_414_path_1_0_413_0                                                              | 47   | dnaja4 protein                                        | 138  | 1.57E-36  | 95.10% | 0.148  | IPR001623 (PRINTS); IPR001623 (SMART); IPR001623 (PFAM); IPR001623 (G3DSA:1.10.287.GENE3D); PTHR24076 (PANTHER); PTHR24076:SF75 (PANTHER); IPR018253 (PROSITE_PATTERNS); IPR001623 (PROSITE_PROFILES); IPR001623 (SUPERFAMILY)                                                                                                                                                                                                                                                                                                                                                                       |
| 1598 | c37942_g1_i1_len_159_path_1082_0_158_2                                                          | 41   | hemagglutinin amebocyte aggregation factor-like       | 53   | 5.84E-09  | 63.10% | 0.189  | PF14704 (PFAM); IPR026645 (PANTHER)                                                                                                                                                                                                                                                                                                                                                                                                                                                                                                                                                                  |
| 1599 | c37942_g2_i1_len_450_path_1220_0_449_1                                                          | 815  | hemagglutinin amebocyte aggregation factor-like       | 150  | 6.20E-17  | 66.80% | 0.129  | PF14704 (PFAM); IPR026645 (PANTHER); CYTOPLASMIC_DOMAIN (PHOBIUS); TRANSMEMBRANE (PHOBIUS); NON_CYTOPLASMIC_DOMAIN (PHOBIUS)                                                                                                                                                                                                                                                                                                                                                                                                                                                                         |
| 1601 | c37955_g1_i1_len_1490_path_1518_0_1489_2                                                        | 2253 | epidermal retinol dehydrogenase 2-like isoform x2     | 496  | 1.38E-111 | 71.70% | 0.123  | Coil (COILS); IPR002347 (PRINTS); IPR002198 (PRINTS); IPR002198 (PFAM); IPR016040 (G3DSA:3.40.50.GENE3D); PTHR24316 (PANTHER); PTHR24316:SF289 (PANTHER); CYTOPLASMIC_DOMAIN (PHOBIUS); TRANSMEMBRANE (PHOBIUS); CYTOPLASMIC_DOMAIN (PHOBIUS); NON_CYTOPLASMIC_DOMAIN (PHOBIUS); TRANSMEMBRANE (PHOBIUS); NON_CYTOPLASMIC_DOMAIN (PHOBIUS); TRANSMEMBRANE (PHOBIUS); SSF51735 (SUPERFAMILY); TMhelix (TMHMM)                                                                                                                                                                                         |
| 1602 | c37995_g1_i1_len_977_path_1_0_49_53_50_862_866_863_976_4                                        | 359  | thioredoxin-dependent peroxide reductase              | 326  | 5.30E-127 | 84.70% | 0.172  | IPR019479 (PFAM); IPR000866 (PFAM); IPR012336 (G3DSA:3.40.30.GENE3D); PTHR10681 (PANTHER); PTHR10681:SF101 (PANTHER); IPR012336 (PROSITE_PROFILES); IPR012336 (SUPERFAMILY)                                                                                                                                                                                                                                                                                                                                                                                                                          |
| 1603 | c38024_g1_i1_len_3260_path_3288_0_3259_1                                                        | 2308 | peroxidasin homolog                                   | 1087 | 8.64E-118 | 54.50% | 0.418Y | Coil (COILS); IPR019791 (PRINTS); IPR019791 (PFAM); IPR019791 (G3DSA:1.10.640.GENE3D); PTHR11475 (PANTHER); CYTOPLASMIC_DOMAIN (PHOBIUS); TRANSMEMBRANE (PHOBIUS); TRANSMEMBRANE (PHOBIUS); TRANSMEMBRANE (PHOBIUS); CYTOPLASMIC_DOMAIN (PHOBIUS); NON_CYTOPLASMIC_DOMAIN (PHOBIUS); NON_CYTOPLASMIC_DOMAIN (PHOBIUS); TRANSMEMBRANE (PHOBIUS); TRANSMEMBRANE (PHOBIUS); IPR019791 (PROSITE_PROFILES); IPR010255 (SUPERFAMILY); TMhelix (TMHMM); TMhelix (TMHMM); TMhelix (TMHMM)                                                                                                                    |
| 1604 | c38034_g1_i2_len_903_path_207_0_199_406_200_382_129_383_546_750_547_548_104_549_902_1           | 7367 | snaclec stejaggregin-a subunit beta-1-like isoform x2 | 301  | 1.83E-13  | 47.10% | 0.285  | IPR001304 (SMART); IPR016186 (G3DSA:3.10.100.GENE3D); IPR001304 (PFAM); PTHR22802 (PANTHER); TRANSMEMBRANE (PHOBIUS); TRANSMEMBRANE (PHOBIUS); NON_CYTOPLASMIC_DOMAIN (PHOBIUS); NON_CYTOPLASMIC_DOMAIN (PHOBIUS); CYTOPLASMIC_DOMAIN (PHOBIUS); TRANSMEMBRANE (PHOBIUS); CYTOPLASMIC_DOMAIN (PHOBIUS); IPR001304 (PROSITE_PROFILES); IPR016187 (SUPERFAMILY); TMhelix (TMHMM)                                                                                                                                                                                                                       |

|      |                                                                                                               |       |                                                               |     |           |        |         |                                                                                                                                                                                                                                                                                                                                                                                                                                                                                                                                                                                  |
|------|---------------------------------------------------------------------------------------------------------------|-------|---------------------------------------------------------------|-----|-----------|--------|---------|----------------------------------------------------------------------------------------------------------------------------------------------------------------------------------------------------------------------------------------------------------------------------------------------------------------------------------------------------------------------------------------------------------------------------------------------------------------------------------------------------------------------------------------------------------------------------------|
| 1605 | c38039_g1_i1_len_731_path_3458_0_199_36<br>58_200_240_3697_241_256_154_257_298_3<br>752_299_730_2             | 19104 | nidogen-2 isoform x5                                          | 243 | 1.07E-22  | 54.70% | 0.266   | IPR000716 (SMART); IPR000716 (PFAM); IPR000716 (G3DSA:4.10.800.GENE3D); IPR022339 (PANTHER); IPR000716 (PROSITE_PATTERNS); IPR000716 (PROSITE_PATTERNS); IPR000716 (PROSITE_PROFILES); IPR000716 (PROSITE_PROFILES); IPR000716 (SUPERFAMILY); IPR000716 (SUPERFAMILY)                                                                                                                                                                                                                                                                                                            |
| 1606 | c38039_g1_i2_len_1498_path_4161_0_161_3<br>658_162_202_138_203_218_154_219_260_1<br>541_261_590_1871_591_14_0 | 6564  | nidogen-2 isoform x3                                          | 500 | 5.71E-20  | 52.60% | 0.735 Y | IPR000716 (SMART); IPR000716 (PFAM); IPR000716 (G3DSA:4.10.800.GENE3D); IPR022339 (PANTHER); IPR000716 (PROSITE_PATTERNS); IPR000716 (PROSITE_PATTERNS); SIGNAL_PEPTIDE_H_REGION (PHOBIUS); SIGNAL_PEPTIDE_C_REGION (PHOBIUS); SIGNAL_PEPTIDE (PHOBIUS); NON_CYTOPLASMIC_DOMAIN (PHOBIUS); SIGNAL_PEPTIDE_N_REGION (PHOBIUS); IPR000716 (PROSITE_PROFILES); IPR000716 (PROSITE_PROFILES); SignalP-noTM (SIGNALP_EUK); IPR000716 (SUPERFAMILY); IPR000716 (SUPERFAMILY)                                                                                                           |
| 1607 | c38055_g2_i1_len_859_path_1_0_620_1532_621_858_4                                                              | 48    | protein bowel                                                 | 286 | 2.56E-106 | 80.60% | 0.102   | IPR015880 (SMART); IPR013087 (G3DSA:3.30.160.GENE3D); PF13894 (PFAM); IPR013087 (G3DSA:3.30.160.GENE3D); IPR007087 (PFAM); IPR013087 (G3DSA:3.30.160.GENE3D); PF13465 (PFAM); PTHR14196 (PANTHER); PTHR14196:SF0 (PANTHER); IPR007087 (PROSITE_PATTERNS); IPR007087 (PROSITE_PATTERNS); IPR007087 (PROSITE_PATTERNS); IPR007087 (PROSITE_PATTERNS); IPR007087 (PROSITE_PROFILES); IPR007087 (PROSITE_PROFILES); IPR007087 (PROSITE_PROFILES); IPR007087 (PROSITE_PROFILES); IPR007087 (PROSITE_PROFILES); SSF57667 (SUPERFAMILY); SSF57667 (SUPERFAMILY); SSF57667 (SUPERFAMILY) |
| 1608 | c38096_g1_i2_len_2020_path_1455_0_130_1<br>586_131_154_3129_155_424_3399_425_426<br>3401_427_901_3876_9_0     | 319   | flavin-containing monooxygenase fmo gs-ox3                    | 674 | 1.03E-142 | 64.80% | 0.183   | IPR000960 (PRINTS); IPR020946 (PFAM); G3DSA:3.50.50.60 (GENE3D); G3DSA:3.50.50.60 (GENE3D); PTHR23023:SF4 (PANTHER); PTHR23023 (PANTHER); SSF51905 (SUPERFAMILY); SSF51905 (SUPERFAMILY)                                                                                                                                                                                                                                                                                                                                                                                         |
| 1609 | c38096_g1_i3_len_1111_path_1455_0_130_1<br>586_131_154_3129_155_424_3399_425_426<br>3401_427_901_7265_9_0     | 170   | flavin-containing monooxygenase fmo gs-ox4-like isoform x1    | 371 | 1.57E-89  | 66.20% | 0.183   | IPR000960 (PRINTS); G3DSA:3.50.50.60 (GENE3D); IPR020946 (PFAM); G3DSA:3.50.50.60 (GENE3D); PTHR23023:SF4 (PANTHER); PTHR23023 (PANTHER); SSF51905 (SUPERFAMILY)                                                                                                                                                                                                                                                                                                                                                                                                                 |
| 1610 | c38096_g2_i1_len_1543_path_2909_0_196_1<br>586_197_220_1610_221_1542_0                                        | 150   | flavin-containing monooxygenase fmo gs-ox4-like isoform x1    | 515 | 5.92E-134 | 62.90% | 0.424 Y | IPR000960 (PRINTS); IPR020946 (PFAM); G3DSA:3.50.50.60 (GENE3D); G3DSA:3.50.50.60 (GENE3D); PTHR23023:SF4 (PANTHER); PTHR23023 (PANTHER); SSF51905 (SUPERFAMILY); SSF51905 (SUPERFAMILY)                                                                                                                                                                                                                                                                                                                                                                                         |
| 1611 | c38101_g2_i1_len_2160_path_2238_0_2159_5                                                                      | 303   | angiotensin-converting enzyme-like                            | 720 | 0         | 71.20% | 0.499Y  | IPR001548 (PRINTS); IPR001548 (PFAM); IPR001548 (PANTHER); CYTOPLASMIC_DOMAIN (PHOBIUS); NON_CYTOPLASMIC_DOMAIN (PHOBIUS); TRANSMEMBRANE (PHOBIUS); SignalP-noTM (SIGNALP_EUK); SSF55486 (SUPERFAMILY)                                                                                                                                                                                                                                                                                                                                                                           |
| 1612 | c38113_g1_i1_len_2012_path_4194_0_316_5<br>23_317_687_892_688_723_4913_724_785_1<br>027_786_1393_5581_13_0    | 263   | mam and ldl-receptor class a domain-containing protein 2-like | 671 | 3.87E-13  | 40.80% | 0.357 Y | IPR002172 (PRINTS); IPR000998 (SMART); IPR002172 (SMART); IPR002172 (G3DSA:4.10.400.GENE3D); IPR002172 (G3DSA:4.10.400.GENE3D); IPR002172 (PFAM); IPR000998 (PFAM); IPR002172 (G3DSA:4.10.400.GENE3D); PTHR23282:SF75 (PANTHER); PTHR23282 (PANTHER); IPR002172 (PROSITE_PROFILES); IPR002172 (PROSITE_PROFILES); IPR000998 (PROSITE_PROFILES); IPR000998 (PROSITE_PROFILES); IPR013320 (SUPERFAMILY); IPR002172 (SUPERFAMILY); IPR013320 (SUPERFAMILY)                                                                                                                          |
| 1613 | c38125_g1_i1_len_632_path_3135_0_73_320<br>9_74_146_2573_147_631_4                                            | 47    | complement c1q tumor necrosis factor-related protein 4        | 211 | 1.47E-11  | 47.60% | 0.139   | IPR001073 (SMART); IPR008983 (G3DSA:2.60.120.GENE3D); IPR001073 (PFAM); PTHR22923 (PANTHER); PTHR22923:SF49 (PANTHER); IPR001073 (PROSITE_PROFILES); IPR008983 (SUPERFAMILY)                                                                                                                                                                                                                                                                                                                                                                                                     |
| 1614 | c38125_g2_i1_len_1228_path_3535_0_1227_0                                                                      | 80    | contactin associated protein 1                                | 410 | 1.60E-64  | 55.70% | 0.653 Y | Coil (COILS); IPR000885 (PFAM); IPR014716 (G3DSA:3.90.215.GENE3D); PTHR10127 (PANTHER); PTHR10127:SF575 (PANTHER); NON_CYTOPLASMIC_DOMAIN (PHOBIUS); SIGNAL_PEPTIDE_H_REGION (PHOBIUS); SIGNAL_PEPTIDE_N_REGION (PHOBIUS); SIGNAL_PEPTIDE (PHOBIUS); SIGNAL_PEPTIDE_C_REGION (PHOBIUS); SignalP-noTM (SIGNALP_EUK); IPR002181 (SUPERFAMILY)                                                                                                                                                                                                                                      |
| 1615 | c38146_g1_i1_len_1810_path_245_0_679_36<br>_680_1809_2                                                        | 220   | leucine-rich repeat-containing protein 59                     | 603 | 9.09E-63  | 65.50% | 0.119   | Coil (COILS); Coil (COILS); IPR003591 (SMART); IPR001611 (PFAM); G3DSA:3.80.10.10 (GENE3D); PTHR23155 (PANTHER); TRANSMEMBRANE (PHOBIUS); NON_CYTOPLASMIC_DOMAIN (PHOBIUS); CYTOPLASMIC_DOMAIN (PHOBIUS); CYTOPLASMIC_DOMAIN (PHOBIUS); TRANSMEMBRANE (PHOBIUS); CYTOPLASMIC_DOMAIN (PHOBIUS); NON_CYTOPLASMIC_DOMAIN (PHOBIUS); TRANSMEMBRANE (PHOBIUS); TRANSMEMBRANE (PHOBIUS); IPR001611 (PROSITE_PROFILES); IPR001611 (PROSITE_PROFILES); IPR001611 (PROSITE_PROFILES); SSF52058 (SUPERFAMILY); TMhelix (TMHMM); TMhelix (TMHMM); TMhelix (TMHMM)                           |



|      |                                                                                                         |      |                                                 |      |           |        |       |                                                                                                                                                                                                                                                                                                                                                                                                                                                                                                                                                                                                  |
|------|---------------------------------------------------------------------------------------------------------|------|-------------------------------------------------|------|-----------|--------|-------|--------------------------------------------------------------------------------------------------------------------------------------------------------------------------------------------------------------------------------------------------------------------------------------------------------------------------------------------------------------------------------------------------------------------------------------------------------------------------------------------------------------------------------------------------------------------------------------------------|
| 1616 | c38149_g1_i1_len_1001_path_243_0_278_52_2_279_303_547_304_405_648_406_406_219_407_867_1103_868_91_3     | 1409 | kazal-type serine protease inhibitor 1 serpin   | 334  | 1.38E-08  | 62.20% | 0.262 | IPR002350 (SMART); IPR002350 (PFAM); G3DSA:3.30.60.30 (GENE3D); IPR002350 (PROSITE_PATTERNS); TRANSMEMBRANE (PHOBIUS); CYTOPLASMIC_DOMAIN (PHOBIUS); TRANSMEMBRANE (PHOBIUS); CYTOPLASMIC_DOMAIN (PHOBIUS); NON_CYTOPLASMIC_DOMAIN (PHOBIUS); IPR002350 (PROSITE_PROFILES); SSF100895 (SUPERFAMILY); TMhelix (TMHMM); TMhelix (TMHMM); TMhelix (TMHMM)                                                                                                                                                                                                                                           |
| 1617 | c38149_g1_i2_len_957_path_243_0_278_522_279_303_547_304_405_648_406_406_219_407_867_144_868_956_4       | 833  | kazal-type serine protease inhibitor 1 serpin   | 319  | 7.23E-09  | 61.83% | 0.301 | IPR002350 (SMART); G3DSA:3.30.60.30 (GENE3D); IPR002350 (PFAM); IPR002350 (PROSITE_PATTERNS); TRANSMEMBRANE (PHOBIUS); SIGNAL_PEPTIDE_N_REGION (PHOBIUS); SIGNAL_PEPTIDE (PHOBIUS); CYTOPLASMIC_DOMAIN (PHOBIUS); SIGNAL_PEPTIDE_H_REGION (PHOBIUS); TRANSMEMBRANE (PHOBIUS); SIGNAL_PEPTIDE_C_REGION (PHOBIUS); NON_CYTOPLASMIC_DOMAIN (PHOBIUS); TRANSMEMBRANE (PHOBIUS); CYTOPLASMIC_DOMAIN (PHOBIUS); NON_CYTOPLASMIC_DOMAIN (PHOBIUS); IPR002350 (PROSITE_PROFILES); SSF100895 (SUPERFAMILY); TMhelix (TMHMM); TMhelix (TMHMM); TMhelix (TMHMM)                                             |
| 1618 | c38156_g1_i1_len_2165_path_2256_0_807_2_4_808_955_3288_956_1135_3468_1136_119_6_3468_1197_1257_3529_1_5 | 297  | cyclin-dependent kinase 11b-like isoform x4     | 721  | 1.36E-132 | 91.50% | 0.097 | Coil (COILS); Coil (COILS); IPR002290 (SMART); G3DSA:1.10.510.10 (GENE3D); G3DSA:3.30.200.20 (GENE3D); IPR000719 (PFAM); PTHR24056 (PANTHER); PTHR24056:SF107 (PANTHER); IPR008271 (PROSITE_PATTERNS); IPR000719 (PROSITE_PROFILES); IPR011009 (SUPERFAMILY)                                                                                                                                                                                                                                                                                                                                     |
| 1619 | c38156_g1_i2_len_2243_path_2256_0_807_3_063_808_882_24_883_1030_3285_1031_103_3_3288_1034_1213_3468_1_5 | 310  | cyclin-dependent kinase 11b-like isoform x4     | 747  | 1.00E-132 | 92.10% | 0.097 | Coil (COILS); Coil (COILS); IPR002290 (SMART); IPR000719 (PFAM); G3DSA:3.30.200.20 (GENE3D); G3DSA:1.10.510.10 (GENE3D); PTHR24056:SF107 (PANTHER); PTHR24056 (PANTHER); IPR008271 (PROSITE_PATTERNS); IPR000719 (PROSITE_PROFILES); IPR011009 (SUPERFAMILY)                                                                                                                                                                                                                                                                                                                                     |
| 1620 | c38177_g1_i1_len_2014_path_1_0_1876_187_8_1877_2013_1                                                   | 204  | 5 -nucleotidase                                 | 671  | 0         | 76.30% | 0.289 | IPR006179 (PRINTS); IPR008334 (G3DSA:3.90.780.GENE3D); IPR004843 (PFAM); IPR008334 (PFAM); IPR029052 (G3DSA:3.60.21.GENE3D); PTHR11575:SF7 (PANTHER); IPR006179 (PANTHER); IPR008334 (SUPERFAMILY); IPR029052 (SUPERFAMILY)                                                                                                                                                                                                                                                                                                                                                                      |
| 1621 | c38177_g1_i2_len_2116_path_1_0_1876_405_2_1877_1978_1878_1979_2115_1                                    | 172  | 5 -nucleotidase                                 | 705  | 0         | 76.40% | 0.289 | IPR006179 (PRINTS); IPR008334 (PFAM); IPR008334 (G3DSA:3.90.780.GENE3D); IPR029052 (G3DSA:3.60.21.GENE3D); IPR004843 (PFAM); PTHR11575:SF7 (PANTHER); IPR006179 (PANTHER); IPR008334 (SUPERFAMILY); IPR029052 (SUPERFAMILY)                                                                                                                                                                                                                                                                                                                                                                      |
| 1622 | c38185_g2_i1_len_3141_path_905_0_1188_9_05_1189_2377_3598_2378_3140_5                                   | 496  | harmonin isoform x2                             | 1047 | 8.31E-42  | 59.40% | 0.097 | Coil (COILS); Coil (COILS); Coil (COILS); IPR001478 (SMART); IPR001478 (G3DSA:2.30.42.GENE3D); IPR001478 (PFAM); IPR001478 (G3DSA:2.30.42.GENE3D); PTHR23116 (PANTHER); IPR001478 (PROSITE_PROFILES); IPR001478 (PROSITE_PROFILES); IPR001478 (SUPERFAMILY); IPR001478 (SUPERFAMILY)                                                                                                                                                                                                                                                                                                             |
| 1623 | c38192_g1_i1_len_2134_path_2292_0_1889_4179_1890_1905_186_1906_2133_0                                   | 131  | blastula protease 10-like                       | 712  | 4.44E-48  | 50.00% | 0.12  | IPR001506 (PRINTS); IPR000859 (SMART); IPR024079 (G3DSA:3.40.390.GENE3D); IPR000859 (PFAM); IPR000859 (G3DSA:2.60.120.GENE3D); IPR001506 (PFAM); IPR000859 (G3DSA:2.60.120.GENE3D); PTHR10127:SF580 (PANTHER); PTHR10127 (PANTHER); IPR000859 (PROSITE_PROFILES); SSF55486 (SUPERFAMILY); IPR000859 (SUPERFAMILY); IPR000859 (SUPERFAMILY)                                                                                                                                                                                                                                                       |
| 1624 | c38196_g1_i1_len_2470_path_2685_0_1607_4288_1608_1626_148_1627_2469_5                                   | 333  | n-acetylglucosamine-6-sulfatase-like isoform x1 | 823  | 9.88E-171 | 59.50% | 0.13  | IPR017849 (G3DSA:3.40.720.GENE3D); IPR000917 (PFAM); PTHR10342 (PANTHER); PTHR10342:SF208 (PANTHER); IPR024607 (PROSITE_PATTERNS); CYTOPLASMIC_DOMAIN (PHOBIUS); TRANSMEMBRANE (PHOBIUS); NON_CYTOPLASMIC_DOMAIN (PHOBIUS); IPR017850 (SUPERFAMILY); TMhelix (TMHMM)                                                                                                                                                                                                                                                                                                                             |
| 1625 | c38200_g1_i1_len_5308_path_1_0_5307_4                                                                   | 1741 | ring finger protein nhl-1                       | 1769 | 0         | 74.10% | 0.238 | Coil (COILS); Coil (COILS); IPR001841 (SMART); IPR013083 (G3DSA:3.30.40.GENE3D); IPR011042 (G3DSA:2.120.10.GENE3D); IPR001258 (PFAM); IPR018957 (PFAM); PTHR24103 (PANTHER); PTHR24103:SF230 (PANTHER); TRANSMEMBRANE (PHOBIUS); NON_CYTOPLASMIC_DOMAIN (PHOBIUS); CYTOPLASMIC_DOMAIN (PHOBIUS); IPR001841 (PROSITE_PROFILES); IPR013017 (PROSITE_PROFILES); IPR013017 (PROSITE_PROFILES); IPR000315 (PROSITE_PROFILES); IPR013017 (PROSITE_PROFILES); IPR013017 (PROSITE_PROFILES); IPR013017 (PROSITE_PROFILES); IPR013017 (PROSITE_PROFILES); SSF101898 (SUPERFAMILY); SSF57850 (SUPERFAMILY) |

|      |                                                                                                         |      |                                                   |     |           |        |         |                                                                                                                                                                                                                                                                                                                                                                                                                                                                                                                                       |
|------|---------------------------------------------------------------------------------------------------------|------|---------------------------------------------------|-----|-----------|--------|---------|---------------------------------------------------------------------------------------------------------------------------------------------------------------------------------------------------------------------------------------------------------------------------------------------------------------------------------------------------------------------------------------------------------------------------------------------------------------------------------------------------------------------------------------|
| 1626 | c38204_g1_i1_len_1756_path_1734_0_1217_3746_1218_1218_3747_1219_1225_2960_12_26_1234_2969_1235_14_0     | 1781 | phospholipid-hydroperoxide glutathione peroxidase | 586 | 2.78E-81  | 80.70% | 0.163   | IPR000889 (PRINTS); IPR012336 (G3DSA:3.40.30.GENE3D); IPR000889 (PFAM); IPR000889 (PANTHER); IPR029760 (PROSITE_PATTERNS); TRANSMEMBRANE (PHOBIUS); CYTOPLASMIC_DOMAIN (PHOBIUS); TRANSMEMBRANE (PHOBIUS); TRANSMEMBRANE (PHOBIUS); NON_CYTOPLASMIC_DOMAIN (PHOBIUS); CYTOPLASMIC_DOMAIN (PHOBIUS); NON_CYTOPLASMIC_DOMAIN (PHOBIUS); IPR000889 (PROSITE_PROFILES); IPR012336 (SUPERFAMILY)                                                                                                                                           |
| 1627 | c38204_g1_i2_len_1742_path_1734_0_1217_3746_1218_1218_3747_1219_1225_2960_12_26_1234_2969_1235_14_0     | 1781 | phospholipid-hydroperoxide glutathione peroxidase | 581 | 2.47E-81  | 80.70% | 0.163   | IPR000889 (PRINTS); IPR000889 (PFAM); IPR012336 (G3DSA:3.40.30.GENE3D); IPR000889 (PANTHER); IPR029760 (PROSITE_PATTERNS); TRANSMEMBRANE (PHOBIUS); NON_CYTOPLASMIC_DOMAIN (PHOBIUS); NON_CYTOPLASMIC_DOMAIN (PHOBIUS); TRANSMEMBRANE (PHOBIUS); TRANSMEMBRANE (PHOBIUS); CYTOPLASMIC_DOMAIN (PHOBIUS); CYTOPLASMIC_DOMAIN (PHOBIUS); IPR000889 (PROSITE_PROFILES); IPR012336 (SUPERFAMILY)                                                                                                                                           |
| 1628 | c38209_g1_i1_len_766_path_2681_0_14_300_0_15_29_628_30_509_1108_510_653_1252_654_765_4                  | 48   | aael012165- partial                               | 255 | 8.77E-86  | 73.40% | 0.559Y  | IPR016162 (G3DSA:3.40.605.GENE3D); IPR015590 (PFAM); PTHR11699 (PANTHER); PTHR11699:SF15 (PANTHER); IPR029510 (PROSITE_PATTERNS); NON_CYTOPLASMIC_DOMAIN (PHOBIUS); SIGNAL_PEPTIDE_N_REGION (PHOBIUS); SIGNAL_PEPTIDE_H_REGION (PHOBIUS); SIGNAL_PEPTIDE (PHOBIUS); SIGNAL_PEPTIDE_C_REGION (PHOBIUS); SignalP-noTM (SIGNALP_EUK); IPR016161 (SUPERFAMILY)                                                                                                                                                                            |
| 1629 | c38209_g1_i2_len_1307_path_2735_0_23_81_24_555_3000_556_570_628_571_1050_110_8_1051_1194_1252_1195_1_4  | 94   | aldehyde dimeric nadp-preferring isoform x2       | 436 | 2.40E-176 | 76.90% | 0.559 Y | IPR012394 (PIRSF); IPR016163 (G3DSA:3.40.309.GENE3D); IPR016162 (G3DSA:3.40.605.GENE3D); IPR015590 (PFAM); PTHR11699 (PANTHER); PTHR11699:SF116 (PANTHER); IPR029510 (PROSITE_PATTERNS); NON_CYTOPLASMIC_DOMAIN (PHOBIUS); SIGNAL_PEPTIDE_N_REGION (PHOBIUS); SIGNAL_PEPTIDE_C_REGION (PHOBIUS); SIGNAL_PEPTIDE_H_REGION (PHOBIUS); SIGNAL_PEPTIDE (PHOBIUS); SignalP-noTM (SIGNALP_EUK); IPR016161 (SUPERFAMILY)                                                                                                                     |
| 1630 | c38209_g1_i3_len_1363_path_1_0_79_81_80_611_3000_612_626_628_627_1106_1108_1_107_1250_1252_1251_1362_4  | 116  | aldehyde dimeric nadp-preferring isoform x3       | 454 | 0         | 77.80% | 0.559 Y | IPR012394 (PIRSF); IPR015590 (PFAM); IPR016162 (G3DSA:3.40.605.GENE3D); IPR016163 (G3DSA:3.40.309.GENE3D); PTHR11699 (PANTHER); PTHR11699:SF15 (PANTHER); IPR029510 (PROSITE_PATTERNS); SIGNAL_PEPTIDE_H_REGION (PHOBIUS); NON_CYTOPLASMIC_DOMAIN (PHOBIUS); SIGNAL_PEPTIDE (PHOBIUS); SIGNAL_PEPTIDE_N_REGION (PHOBIUS); SIGNAL_PEPTIDE_C_REGION (PHOBIUS); SignalP-noTM (SIGNALP_EUK); IPR016161 (SUPERFAMILY)                                                                                                                      |
| 1631 | c38209_g1_i4_len_1219_path_1_0_79_81_80_611_3000_612_626_628_627_1106_1252_1_107_1218_4                 | 84   | aldehyde dimeric nadp-preferring isoform x3       | 406 | 2.43E-172 | 80.00% | 0.568 Y | IPR016163 (G3DSA:3.40.309.GENE3D); IPR015590 (PFAM); IPR012394 (PIRSF); IPR016162 (G3DSA:3.40.605.GENE3D); PTHR11699:SF15 (PANTHER); PTHR11699 (PANTHER); IPR029510 (PROSITE_PATTERNS); SIGNAL_PEPTIDE_H_REGION (PHOBIUS); SIGNAL_PEPTIDE_N_REGION (PHOBIUS); SIGNAL_PEPTIDE (PHOBIUS); SIGNAL_PEPTIDE_C_REGION (PHOBIUS); NON_CYTOPLASMIC_DOMAIN (PHOBIUS); SignalP-noTM (SIGNALP_EUK); IPR016161 (SUPERFAMILY)                                                                                                                      |
| 1632 | c38209_g1_i5_len_745_path_1_0_79_81_80_611_3000_612_626_2874_627_744_4                                  | 48   | aldehyde dimeric nadp-preferring isoform x4       | 248 | 1.00E-98  | 83.50% | 0.143   | IPR015590 (PFAM); IPR016163 (G3DSA:3.40.309.GENE3D); PTHR11699:SF15 (PANTHER); PTHR11699 (PANTHER); IPR016161 (SUPERFAMILY)                                                                                                                                                                                                                                                                                                                                                                                                           |
| 1633 | c38211_g1_i1_len_2566_path_559_0_2565_1                                                                 | 288  | tensin isoform x11                                | 855 | 5.17E-143 | 61.20% | 0.121   | IPR029021 (G3DSA:3.90.190.GENE3D); IPR014020 (PFAM); G3DSA:2.60.40.1110 (GENE3D); PTHR12583:SF7 (PANTHER); PTHR12583 (PANTHER); IPR029023 (PROSITE_PROFILES); IPR014020 (PROSITE_PROFILES); IPR029021 (SUPERFAMILY); IPR000008 (SUPERFAMILY)                                                                                                                                                                                                                                                                                          |
| 1634 | c38245_g1_i1_len_1518_path_1_0_377_379_378_390_392_391_749_751_750_774_776_775_1098_3086_1099_2         | 1950 | zinc metalloproteinase nas-14-like                | 506 | 1.18E-48  | 58.40% | 0.183   | IPR001506 (PRINTS); IPR006026 (SMART); IPR002557 (SMART); IPR002557 (PFAM); IPR024079 (G3DSA:3.40.390.GENE3D); IPR002557 (G3DSA:2.170.140.GENE3D); IPR001506 (PFAM); PTHR10127 (PANTHER); NON_CYTOPLASMIC_DOMAIN (PHOBIUS); NON_CYTOPLASMIC_DOMAIN (PHOBIUS); CYTOPLASMIC_DOMAIN (PHOBIUS); TRANSMEMBRANE (PHOBIUS); CYTOPLASMIC_DOMAIN (PHOBIUS); TRANSMEMBRANE (PHOBIUS); TRANSMEMBRANE (PHOBIUS); IPR002557 (PROSITE_PROFILES); IPR002557 (SUPERFAMILY); SSF55486 (SUPERFAMILY); TMhelix (TMHMM); TMhelix (TMHMM); TMhelix (TMHMM) |
| 1635 | c38274_g2_i1_len_973_path_1830_0_319_15_4_320_353_2854_354_483_2319_484_507_3_069_508_525_2361_526_97_1 | 387  | cathepsin I-like                                  | 324 | 5.13E-136 | 76.60% | 0.12    | IPR000668 (PRINTS); IPR013201 (SMART); IPR000668 (SMART); IPR000668 (PFAM); IPR013201 (PFAM); G3DSA:3.90.70.10 (GENE3D); IPR013128 (PANTHER); PTHR12411:SF57 (PANTHER); IPR000169 (PROSITE_PATTERNS); SSF54001 (SUPERFAMILY)                                                                                                                                                                                                                                                                                                          |

|      |                                                                                                      |     |                                            |      |           |        |       |                                                                                                                                                                                                                                                                                                                                                                                                                  |
|------|------------------------------------------------------------------------------------------------------|-----|--------------------------------------------|------|-----------|--------|-------|------------------------------------------------------------------------------------------------------------------------------------------------------------------------------------------------------------------------------------------------------------------------------------------------------------------------------------------------------------------------------------------------------------------|
| 1636 | c38283_g1_i1_len_1959_path_1937_0_1958_3                                                             | 199 | biotinidase                                | 653  | 1.30E-75  | 50.40% | 0.209 | IPR003010 (G3DSA:3.60.110.GENE3D); IPR003010 (PFAM); IPR012101 (PANTHER); PTHR10609:SF14 (PANTHER); CYTOPLASMIC_DOMAIN (PHOBIUS); TRANSMEMBRANE (PHOBIUS); NON_CYTOPLASMIC_DOMAIN (PHOBIUS); IPR003010 (PROSITE_PROFILES); IPR003010 (SUPERFAMILY); TMhelix (TMHMM)                                                                                                                                              |
| 1637 | c38285_g1_i1_len_1897_path_1875_0_1896_2                                                             | 92  | c-type mannose receptor 2-like             | 632  | 1.33E-12  | 51.50% | 0.263 | IPR001304 (SMART); IPR001304 (PFAM); IPR016186 (G3DSA:3.10.100.GENE3D); PTHR22802 (PANTHER); NON_CYTOPLASMIC_DOMAIN (PHOBIUS); TRANSMEMBRANE (PHOBIUS); TRANSMEMBRANE (PHOBIUS); NON_CYTOPLASMIC_DOMAIN (PHOBIUS); CYTOPLASMIC_DOMAIN (PHOBIUS); TRANSMEMBRANE (PHOBIUS); CYTOPLASMIC_DOMAIN (PHOBIUS); IPR001304 (PROSITE_PROFILES); IPR016187 (SUPERFAMILY); TMhelix (TMHMM); TMhelix (TMHMM); TMhelix (TMHMM) |
| 1638 | c38299_g1_i1_len_610_path_687_0_21_709_22_514_3461_515_609_4                                         | 165 | acidic phospholipase a2 pa4 isoform x2     | 203  | 9.03E-28  | 54.70% | 0.193 | IPR016090 (G3DSA:1.20.90.GENE3D); IPR001211 (PFAM); PTHR12253:SF13 (PANTHER); PTHR12253 (PANTHER); IPR013090 (PROSITE_PATTERNS); NON_CYTOPLASMIC_DOMAIN (PHOBIUS); TRANSMEMBRANE (PHOBIUS); CYTOPLASMIC_DOMAIN (PHOBIUS); IPR016090 (SUPERFAMILY); TMhelix (TMHMM)                                                                                                                                               |
| 1639 | c38299_g1_i2_len_1238_path_598_0_27_235_1_28_649_709_650_1142_3461_1143_1237_4                       | 408 | acidic phospholipase a2 pa4 isoform x2     | 413  | 2.62E-43  | 56.90% | 0.193 | IPR001211 (PFAM); IPR016090 (G3DSA:1.20.90.GENE3D); PTHR12253 (PANTHER); IPR013090 (PROSITE_PATTERNS); NON_CYTOPLASMIC_DOMAIN (PHOBIUS); TRANSMEMBRANE (PHOBIUS); CYTOPLASMIC_DOMAIN (PHOBIUS); IPR016090 (SUPERFAMILY); TMhelix (TMHMM)                                                                                                                                                                         |
| 1640 | c38331_g1_i1_len_2189_path_2167_0_1153_3321_1154_1384_3552_1385_2188_5                               | 948 | pancreatic lipase-related protein partial  | 729  | 5.67E-102 | 55.30% | 0.129 | IPR000734 (PRINTS); IPR013818 (PFAM); IPR029058 (G3DSA:3.40.50.GENE3D); PTHR11610:SF41 (PANTHER); IPR000734 (PANTHER); NON_CYTOPLASMIC_DOMAIN (PHOBIUS); CYTOPLASMIC_DOMAIN (PHOBIUS); TRANSMEMBRANE (PHOBIUS); CYTOPLASMIC_DOMAIN (PHOBIUS); TRANSMEMBRANE (PHOBIUS); IPR029058 (SUPERFAMILY); TMhelix (TMHMM)                                                                                                  |
| 1641 | c38331_g1_i2_len_1958_path_2167_0_1153_3552_1154_1957_5                                              | 771 | pancreatic lipase-related protein partial  | 652  | 2.18E-63  | 47.30% | 0.129 | IPR000734 (PRINTS); IPR029058 (G3DSA:3.40.50.GENE3D); IPR013818 (PFAM); IPR000734 (PANTHER); PTHR11610:SF41 (PANTHER); CYTOPLASMIC_DOMAIN (PHOBIUS); NON_CYTOPLASMIC_DOMAIN (PHOBIUS); TRANSMEMBRANE (PHOBIUS); TRANSMEMBRANE (PHOBIUS); CYTOPLASMIC_DOMAIN (PHOBIUS); IPR029058 (SUPERFAMILY); TMhelix (TMHMM)                                                                                                  |
| 1642 | c38338_g1_i1_len_531_path_263_0_156_420_157_530_4                                                    | 54  | platelet-activating factor acetylhydrolase | 177  | 2.50E-06  | 68.80% | 0.123 | IPR005065 (PFAM)                                                                                                                                                                                                                                                                                                                                                                                                 |
| 1643 | c38338_g1_i2_len_1486_path_1979_0_1111_420_1112_1485_4                                               | 348 | platelet-activating factor acetylhydrolase | 495  | 3.61E-102 | 57.20% | 0.123 | Coil (COILS); IPR029058 (G3DSA:3.40.50.GENE3D); IPR005065 (PFAM); IPR005065 (PANTHER); IPR029058 (SUPERFAMILY)                                                                                                                                                                                                                                                                                                   |
| 1644 | c38381_g2_i1_len_3331_path_7073_0_2581_9655_2582_2604_9678_2605_3330_0                               | 322 | glutamyl aminopeptidase                    | 1111 | 0         | 63.50% | 0.297 | IPR014782 (PRINTS); G3DSA:1.10.390.10 (GENE3D); IPR024571 (PFAM); IPR014782 (PFAM); IPR001930 (PANTHER); PTHR11533:SF165 (PANTHER); CYTOPLASMIC_DOMAIN (PHOBIUS); TRANSMEMBRANE (PHOBIUS); NON_CYTOPLASMIC_DOMAIN (PHOBIUS); SSF63737 (SUPERFAMILY); SSF55486 (SUPERFAMILY); TMhelix (TMHMM)                                                                                                                     |
| 1645 | c38385_g1_i1_len_2155_path_2245_0_1039_6919_1040_2154_5                                              | 304 | venom carboxylesterase-6                   | 718  | 1.17E-37  | 52.40% | 0.247 | IPR029058 (G3DSA:3.40.50.GENE3D); IPR002018 (PFAM); PTHR11559 (PANTHER); PTHR11559:SF153 (PANTHER); NON_CYTOPLASMIC_DOMAIN (PHOBIUS); CYTOPLASMIC_DOMAIN (PHOBIUS); TRANSMEMBRANE (PHOBIUS); IPR029058 (SUPERFAMILY)                                                                                                                                                                                             |
| 1646 | c38385_g1_i3_len_2267_path_2245_0_1039_3285_1040_1722_3968_1723_1917_5768_1918_1930_4176_1931_2266_3 | 402 | esterase fe4                               | 756  | 1.79E-145 | 58.10% | 0.208 | IPR029058 (G3DSA:3.40.50.GENE3D); IPR002018 (PFAM); PTHR11559 (PANTHER); IPR019819 (PROSITE_PATTERNS); IPR019826 (PROSITE_PATTERNS); TRANSMEMBRANE (PHOBIUS); NON_CYTOPLASMIC_DOMAIN (PHOBIUS); CYTOPLASMIC_DOMAIN (PHOBIUS); IPR029058 (SUPERFAMILY)                                                                                                                                                            |

|      |                                                                                                         |      |                                                          |      |           |        |         |                                                                                                                                                                                                                                                                                                                                                                                                                                                                                                                                                                                                                                                                      |
|------|---------------------------------------------------------------------------------------------------------|------|----------------------------------------------------------|------|-----------|--------|---------|----------------------------------------------------------------------------------------------------------------------------------------------------------------------------------------------------------------------------------------------------------------------------------------------------------------------------------------------------------------------------------------------------------------------------------------------------------------------------------------------------------------------------------------------------------------------------------------------------------------------------------------------------------------------|
| 1647 | c38470_g1_i1_len_3338_path_140_0_23_164_24_47_315_48_1003_86_1004_3337_4                                | 663  | 12 kda fk506-binding protein                             | 1113 | 8.10E-59  | 90.10% | 0.313   | G3DSA:3.10.50.40 (GENE3D); IPR001179 (PFAM); PTHR10516:SF272 (PANTHER); IPR023566 (PANTHER); TRANSMEMBRANE (PHOBIUS); NON_CYTOPLASMIC_DOMAIN (PHOBIUS); NON_CYTOPLASMIC_DOMAIN (PHOBIUS); CYTOPLASMIC_DOMAIN (PHOBIUS); TRANSMEMBRANE (PHOBIUS); TRANSMEMBRANE (PHOBIUS); TRANSMEMBRANE (PHOBIUS); CYTOPLASMIC_DOMAIN (PHOBIUS); CYTOPLASMIC_DOMAIN (PHOBIUS); NON_CYTOPLASMIC_DOMAIN (PHOBIUS); NON_CYTOPLASMIC_DOMAIN (PHOBIUS); TRANSMEMBRANE (PHOBIUS); CYTOPLASMIC_DOMAIN (PHOBIUS); TRANSMEMBRANE (PHOBIUS); TRANSMEMBRANE (PHOBIUS); IPR001179 (PROSITE_PROFILES); SSF54534 (SUPERFAMILY); TMhelix (TMHMM); TMhelix (TMHMM); TMhelix (TMHMM); TMhelix (TMHMM) |
| 1648 | c38483_g1_i1_len_2448_path_53_0_14_68_1_5_550_604_551_2402_2454_2403_2417_245_4_2418_2432_2454_2433_2_4 | 1628 | superoxide dismutase soluble                             | 816  | 1.14E-42  | 54.60% | 0.105   | IPR001424 (PRINTS); IPR001424 (PFAM); IPR001424 (G3DSA:2.60.40.GENE3D); PTHR10003 (PANTHER); IPR018152 (PROSITE_PATTERNS); NON_CYTOPLASMIC_DOMAIN (PHOBIUS); TRANSMEMBRANE (PHOBIUS); CYTOPLASMIC_DOMAIN (PHOBIUS); NON_CYTOPLASMIC_DOMAIN (PHOBIUS); TRANSMEMBRANE (PHOBIUS); IPR001424 (SUPERFAMILY); TMhelix (TMHMM); TMhelix (TMHMM)                                                                                                                                                                                                                                                                                                                             |
| 1649 | c38483_g1_i2_len_2521_path_4933_0_87_68_88_623_604_624_2475_2454_2476_2490_2_454_2491_2505_2454_2506_4  | 1634 | superoxide dismutase soluble                             | 840  | 1.54E-42  | 54.60% | 0.105   | IPR001424 (PRINTS); IPR001424 (PFAM); IPR001424 (G3DSA:2.60.40.GENE3D); PTHR10003 (PANTHER); IPR018152 (PROSITE_PATTERNS); NON_CYTOPLASMIC_DOMAIN (PHOBIUS); CYTOPLASMIC_DOMAIN (PHOBIUS); TRANSMEMBRANE (PHOBIUS); TRANSMEMBRANE (PHOBIUS); NON_CYTOPLASMIC_DOMAIN (PHOBIUS); TRANSMEMBRANE (PHOBIUS); IPR001424 (SUPERFAMILY); TMhelix (TMHMM); TMhelix (TMHMM); TMhelix (TMHMM)                                                                                                                                                                                                                                                                                   |
| 1650 | c38485_g1_i1_len_1739_path_2871_0_1144_4834_1145_1325_587_1326_1738_1                                   | 175  | delta-1-pyrroline-5-carboxylate mitochondrial isoform x1 | 580  | 0         | 79.70% | 0.344 Y | IPR015590 (PFAM); IPR016162 (G3DSA:3.40.605.GENE3D); IPR016163 (G3DSA:3.40.309.GENE3D); PTHR11699 (PANTHER); PTHR11699:SF18 (PANTHER); IPR016160 (PROSITE_PATTERNS); NON_CYTOPLASMIC_DOMAIN (PHOBIUS); SIGNAL_PEPTIDE_C_REGION (PHOBIUS); SIGNAL_PEPTIDE (PHOBIUS); SIGNAL_PEPTIDE_H_REGION (PHOBIUS); SIGNAL_PEPTIDE_N_REGION (PHOBIUS); IPR016161 (SUPERFAMILY)                                                                                                                                                                                                                                                                                                    |
| 1651 | c38485_g1_i2_len_1883_path_2871_0_1144_4834_1145_1325_4193_1326_1818_4683_18_19_1837_22_1838_1882_1     | 254  | delta-1-pyrroline-5-carboxylate mitochondrial            | 628  | 0         | 80.30% | 0.344 Y | IPR016162 (G3DSA:3.40.605.GENE3D); IPR016163 (G3DSA:3.40.309.GENE3D); IPR005931 (TIGRFAM); IPR015590 (PFAM); PTHR11699:SF18 (PANTHER); PTHR11699 (PANTHER); IPR016160 (PROSITE_PATTERNS); NON_CYTOPLASMIC_DOMAIN (PHOBIUS); SIGNAL_PEPTIDE_N_REGION (PHOBIUS); SIGNAL_PEPTIDE_C_REGION (PHOBIUS); SIGNAL_PEPTIDE_H_REGION (PHOBIUS); SIGNAL_PEPTIDE (PHOBIUS); IPR016161 (SUPERFAMILY)                                                                                                                                                                                                                                                                               |
| 1652 | c38485_g1_i3_len_1864_path_2871_0_1144_4834_1145_1325_4193_1326_1818_22_1819_1863_1                     | 248  | pyrroline-5-carboxylate dehydrogenase                    | 621  | 0         | 80.50% | 0.344 Y | IPR016163 (G3DSA:3.40.309.GENE3D); IPR015590 (PFAM); IPR005931 (TIGRFAM); IPR016162 (G3DSA:3.40.605.GENE3D); PTHR11699 (PANTHER); PTHR11699:SF18 (PANTHER); IPR016160 (PROSITE_PATTERNS); SIGNAL_PEPTIDE (PHOBIUS); SIGNAL_PEPTIDE_N_REGION (PHOBIUS); NON_CYTOPLASMIC_DOMAIN (PHOBIUS); SIGNAL_PEPTIDE_H_REGION (PHOBIUS); SIGNAL_PEPTIDE_C_REGION (PHOBIUS); IPR016161 (SUPERFAMILY)                                                                                                                                                                                                                                                                               |
| 1653 | c38487_g1_i1_len_1503_path_91_0_794_71_795_1502_4                                                       | 590  | acid ceramidase                                          | 501  | 1.90E-158 | 71.90% | 0.209   | Coil (COILS); IPR029130 (PFAM); IPR029132 (PFAM); TRANSMEMBRANE (PHOBIUS); CYTOPLASMIC_DOMAIN (PHOBIUS); NON_CYTOPLASMIC_DOMAIN (PHOBIUS); TMhelix (TMHMM)                                                                                                                                                                                                                                                                                                                                                                                                                                                                                                           |
| 1654 | c38494_g2_i1_len_1410_path_1678_0_276_1_954_277_549_2225_550_560_2236_561_584_2260_585_990_2666_991_1   | 202  | peptidyl-prolyl cis-trans isomerase-like isoform x1      | 470  | 1.35E-50  | 53.90% | 0.218   | IPR002130 (PFAM); IPR029000 (G3DSA:2.40.100.GENE3D); PTHR11071:SF209 (PANTHER); IPR024936 (PANTHER); IPR002130 (PROSITE_PROFILES); IPR029000 (SUPERFAMILY)                                                                                                                                                                                                                                                                                                                                                                                                                                                                                                           |
| 1655 | c38494_g2_i2_len_1035_path_1678_0_276_1_954_277_549_7532_550_560_2236_561_584_7566_585_1034_1           | 134  | peptidyl-prolyl cis-trans isomerase a2                   | 345  | 1.01E-45  | 53.20% | 0.218   | IPR029000 (G3DSA:2.40.100.GENE3D); IPR002130 (PFAM); PTHR11071:SF202 (PANTHER); IPR024936 (PANTHER); IPR002130 (PROSITE_PROFILES); IPR029000 (SUPERFAMILY)                                                                                                                                                                                                                                                                                                                                                                                                                                                                                                           |
| 1656 | c38500_g1_i1_len_1375_path_157_0_1185_4_106_1186_1374_2                                                 | 250  | serpin 3                                                 | 458  | 2.15E-84  | 59.70% | 0.115   | IPR023796 (SMART); IPR023796 (PFAM); G3DSA:2.30.39.10 (GENE3D); G3DSA:3.30.497.10 (GENE3D); IPR000215 (PANTHER); PTHR11461:SF52 (PANTHER); IPR023795 (PROSITE_PATTERNS); CYTOPLASMIC_DOMAIN (PHOBIUS); NON_CYTOPLASMIC_DOMAIN (PHOBIUS); TRANSMEMBRANE (PHOBIUS); IPR023796 (SUPERFAMILY); TMhelix (TMHMM)                                                                                                                                                                                                                                                                                                                                                           |

|      |                                                                                                            |     |                                              |     |           |        |         |                                                                                                                                                                                                                                                                                                                                                                                                                                                                                                                                                                                                                                                                                                                                                                                                                                                                                                             |
|------|------------------------------------------------------------------------------------------------------------|-----|----------------------------------------------|-----|-----------|--------|---------|-------------------------------------------------------------------------------------------------------------------------------------------------------------------------------------------------------------------------------------------------------------------------------------------------------------------------------------------------------------------------------------------------------------------------------------------------------------------------------------------------------------------------------------------------------------------------------------------------------------------------------------------------------------------------------------------------------------------------------------------------------------------------------------------------------------------------------------------------------------------------------------------------------------|
| 1657 | c38500_g1_i2_len_1835_path_157_0_1185_1<br>337_1186_1834_2                                                 | 618 | serpin 3                                     | 611 | 3.68E-82  | 58.90% | 0.115   | IPR023796 (SMART); G3DSA:3.30.497.10 (GENE3D); G3DSA:2.30.39.10 (GENE3D); IPR023796 (PFAM); IPR000215 (PANTHER); PTHR11461:SF52 (PANTHER); IPR023795 (PROSITE_PATTERNS); CYTOPLASMIC_DOMAIN (PHOBIUS); NON_CYTOPLASMIC_DOMAIN (PHOBIUS); TRANSMEMBRANE (PHOBIUS); IPR023796 (SUPERFAMILY); TMhelix (TMHMM)                                                                                                                                                                                                                                                                                                                                                                                                                                                                                                                                                                                                  |
| 1658 | c38530_g1_i1_len_2213_path_6927_0_1075_<br>8001_1076_2212_2                                                | 727 | latrophilin cirl-like isoform x1             | 737 | 2.49E-178 | 59.50% | 0.351 Y | Coil (COILS); IPR000832 (PFAM); PTHR12011:SF258 (PANTHER); PTHR12011 (PANTHER); IPR017983 (PROSITE_PATTERNS); TRANSMEMBRANE (PHOBIUS); TRANSMEMBRANE (PHOBIUS); TRANSMEMBRANE (PHOBIUS); CYTOPLASMIC_DOMAIN (PHOBIUS); TRANSMEMBRANE (PHOBIUS); TRANSMEMBRANE (PHOBIUS); NON_CYTOPLASMIC_DOMAIN (PHOBIUS); CYTOPLASMIC_DOMAIN (PHOBIUS); CYTOPLASMIC_DOMAIN (PHOBIUS); NON_CYTOPLASMIC_DOMAIN (PHOBIUS); NON_CYTOPLASMIC_DOMAIN (PHOBIUS); CYTOPLASMIC_DOMAIN (PHOBIUS); IPR017981 (PROSITE_PROFILES); TMhelix (TMHMM); TMhelix (TMHMM); TMhelix (TMHMM); TMhelix (TMHMM)                                                                                                                                                                                                                                                                                                                                   |
| 1659 | c38530_g2_i1_len_2001_path_2192_0_1735_<br>3928_1736_1759_4639_1760_1860_4740_18<br>61_2000_5              | 185 | latrophilin cirl-like isoform x1             | 667 | 0         | 67.20% | 0.127   | IPR000203 (SMART); IPR001879 (SMART); IPR000203 (PFAM); IPR000922 (PFAM); IPR022624 (PFAM); IPR001879 (PFAM); IPR000832 (PFAM); PTHR12011 (PANTHER); PTHR12011:SF217 (PANTHER); NON_CYTOPLASMIC_DOMAIN (PHOBIUS); TRANSMEMBRANE (PHOBIUS); TRANSMEMBRANE (PHOBIUS); NON_CYTOPLASMIC_DOMAIN (PHOBIUS); CYTOPLASMIC_DOMAIN (PHOBIUS); TRANSMEMBRANE (PHOBIUS); CYTOPLASMIC_DOMAIN (PHOBIUS); IPR000922 (PROSITE_PROFILES); IPR017981 (PROSITE_PROFILES); IPR000203 (PROSITE_PROFILES); IPR001879 (PROSITE_PROFILES); TMhelix (TMHMM); TMhelix (TMHMM); TMhelix (TMHMM)                                                                                                                                                                                                                                                                                                                                        |
| 1660 | c38530_g2_i2_len_2214_path_2192_0_1735_<br>3928_1736_1759_9849_1760_1760_3953_17<br>61_2213_5              | 198 | latrophilin cirl-like isoform x1             | 738 | 0         | 64.70% | 0.102   | IPR000203 (SMART); IPR001879 (SMART); IPR000832 (PFAM); IPR001879 (PFAM); IPR000203 (PFAM); IPR022624 (PFAM); PTHR12011:SF217 (PANTHER); PTHR12011 (PANTHER); NON_CYTOPLASMIC_DOMAIN (PHOBIUS); TRANSMEMBRANE (PHOBIUS); TRANSMEMBRANE (PHOBIUS); CYTOPLASMIC_DOMAIN (PHOBIUS); NON_CYTOPLASMIC_DOMAIN (PHOBIUS); TRANSMEMBRANE (PHOBIUS); NON_CYTOPLASMIC_DOMAIN (PHOBIUS); TRANSMEMBRANE (PHOBIUS); CYTOPLASMIC_DOMAIN (PHOBIUS); CYTOPLASMIC_DOMAIN (PHOBIUS); IPR017981 (PROSITE_PROFILES); IPR001879 (PROSITE_PROFILES); IPR000203 (PROSITE_PROFILES); TMhelix (TMHMM); TMhelix (TMHMM); TMhelix (TMHMM); TMhelix (TMHMM); TMhelix (TMHMM); TMhelix (TMHMM)                                                                                                                                                                                                                                            |
| 1661 | c38535_g1_i1_len_1146_path_1224_0_373_1<br>594_374_387_1608_388_1028_2249_1029_<br>1054_2275_1055_1145_5   | 84  | i-type lysozyme                              | 382 | 1.93E-35  | 64.50% | 0.12    | IPR008597 (PFAM); IPR008597 (PANTHER); IPR018247 (PROSITE_PATTERNS); TRANSMEMBRANE (PHOBIUS); NON_CYTOPLASMIC_DOMAIN (PHOBIUS); CYTOPLASMIC_DOMAIN (PHOBIUS); TMhelix (TMHMM); TMhelix (TMHMM)                                                                                                                                                                                                                                                                                                                                                                                                                                                                                                                                                                                                                                                                                                              |
| 1662 | c38535_g1_i2_len_1120_path_1224_0_373_1<br>594_374_387_1608_388_1028_2275_1029_<br>1119_3                  | 70  | i-type lysozyme                              | 374 | 1.69E-35  | 65.30% | 0.183   | IPR008597 (PFAM); IPR008597 (PANTHER); IPR018247 (PROSITE_PATTERNS); TRANSMEMBRANE (PHOBIUS); NON_CYTOPLASMIC_DOMAIN (PHOBIUS); CYTOPLASMIC_DOMAIN (PHOBIUS); TRANSMEMBRANE (PHOBIUS); CYTOPLASMIC_DOMAIN (PHOBIUS); TMhelix (TMHMM); TMhelix (TMHMM)                                                                                                                                                                                                                                                                                                                                                                                                                                                                                                                                                                                                                                                       |
| 1663 | c38544_g1_i1_len_2797_path_3016_0_543_3<br>557_544_545_171_546_1980_4990_1981_2<br>004_70_2005_2672_48_2_3 | 731 | leucine-rich repeat-containing protein let-4 | 933 | 2.36E-150 | 69.30% | 0.161   | IPR003591 (SMART); SM00365 (SMART); G3DSA:3.80.10.10 (GENE3D); IPR001611 (PFAM); G3DSA:3.80.10.10 (GENE3D); IPR001611 (PFAM); PTHR24373:SF98 (PANTHER); PTHR24373 (PANTHER); CYTOPLASMIC_DOMAIN (PHOBIUS); CYTOPLASMIC_DOMAIN (PHOBIUS); TRANSMEMBRANE (PHOBIUS); NON_CYTOPLASMIC_DOMAIN (PHOBIUS); TRANSMEMBRANE (PHOBIUS); TRANSMEMBRANE (PHOBIUS); CYTOPLASMIC_DOMAIN (PHOBIUS); TRANSMEMBRANE (PHOBIUS); CYTOPLASMIC_DOMAIN (PHOBIUS); TRANSMEMBRANE (PHOBIUS); NON_CYTOPLASMIC_DOMAIN (PHOBIUS); NON_CYTOPLASMIC_DOMAIN (PHOBIUS); TRANSMEMBRANE (PHOBIUS); IPR001611 (PROSITE_PROFILES); SSF52058 (SUPERFAMILY); TMhelix (TMHMM); TMhelix (TMHMM); TMhelix (TMHMM); TMhelix (TMHMM) |



|      |                                                                                                          |      |                                                      |      |           |        |         |                                                                                                                                                                                                                                                                                                                                                                                                                                                                                                                                                                                                                                                                                                                                                                                                                                                                                                                                           |
|------|----------------------------------------------------------------------------------------------------------|------|------------------------------------------------------|------|-----------|--------|---------|-------------------------------------------------------------------------------------------------------------------------------------------------------------------------------------------------------------------------------------------------------------------------------------------------------------------------------------------------------------------------------------------------------------------------------------------------------------------------------------------------------------------------------------------------------------------------------------------------------------------------------------------------------------------------------------------------------------------------------------------------------------------------------------------------------------------------------------------------------------------------------------------------------------------------------------------|
| 1664 | c38544_g1_i3_len_2773_path_3016_0_543_3<br>557_544_545_171__546_1980_70_1981_264<br>8_48_2649_2772_3     | 695  | leucine-rich repeat-containing protein 70 isoform x1 | 925  | 1.44E-152 | 69.90% | 0.161   | IPR003591 (SMART); SM00365 (SMART); G3DSA:3.80.10.10 (GENE3D); IPR001611 (PFAM); G3DSA:3.80.10.10 (GENE3D); IPR001611 (PFAM); PTHR24373 (PANTHER); PTHR24373:SF98 (PANTHER); NON_CYTOPLASMIC_DOMAIN (PHOBIUS); TRANSMEMBRANE (PHOBIUS); NON_CYTOPLASMIC_DOMAIN (PHOBIUS); CYTOPLASMIC_DOMAIN (PHOBIUS); CYTOPLASMIC_DOMAIN (PHOBIUS); CYTOPLASMIC_DOMAIN (PHOBIUS); CYTOPLASMIC_DOMAIN (PHOBIUS); TRANSMEMBRANE (PHOBIUS); CYTOPLASMIC_DOMAIN (PHOBIUS); TRANSMEMBRANE (PHOBIUS); TRANSMEMBRANE (PHOBIUS); TRANSMEMBRANE (PHOBIUS); TRANSMEMBRANE (PHOBIUS); NON_CYTOPLASMIC_DOMAIN (PHOBIUS); IPR001611 (PROSITE_PROFILES); SSF52058 (SUPERFAMILY); TMhelix (TMHMM); TMhelix (TMHMM); TMhelix (TMHMM); TMhelix (TMHMM) |
| 1665 | c38559_g1_i1_len_3628_path_105_0_200_30<br>4_201_224_328_225_3627_1                                      | 506  | insulin-degrading enzyme                             | 1209 | 0         | 76.50% | 0.254   | Coil (COILS); IPR007863 (PFAM); IPR011237 (G3DSA:3.30.830.GENE3D); IPR011237 (G3DSA:3.30.830.GENE3D); IPR011237 (G3DSA:3.30.830.GENE3D); PTHR11851 (PANTHER); PTHR11851:SF85 (PANTHER); IPR001431 (PROSITE_PATTERNS); IPR011249 (SUPERFAMILY); IPR011249 (SUPERFAMILY); IPR011249 (SUPERFAMILY); IPR011249 (SUPERFAMILY)                                                                                                                                                                                                                                                                                                                                                                                                                                                                                                                                                                                                                  |
| 1666 | c38580_g1_i1_len_1567_path_1595_0_685_2<br>279_686_1120_2714_1121_1122_2716__11<br>23_1513_3107_1514_1_0 | 2454 | epoxide hydrolase 4                                  | 523  | 2.90E-102 | 62.10% | 0.098   | IPR000639 (PRINTS); IPR000073 (PFAM); IPR029058 (G3DSA:3.40.50.GENE3D); PTHR10992:SF721 (PANTHER); PTHR10992 (PANTHER); TRANSMEMBRANE (PHOBIUS); CYTOPLASMIC_DOMAIN (PHOBIUS); TRANSMEMBRANE (PHOBIUS); NON_CYTOPLASMIC_DOMAIN (PHOBIUS); NON_CYTOPLASMIC_DOMAIN (PHOBIUS); IPR029058 (SUPERFAMILY); TMhelix (TMHMM); TMhelix (TMHMM)                                                                                                                                                                                                                                                                                                                                                                                                                                                                                                                                                                                                     |
| 1667 | c38587_g1_i1_len_859_path_105_0_858_3                                                                    | 834  | cre-nas-7 protein                                    | 287  | 7.58E-34  | 53.90% | 0.891 Y | IPR001506 (PRINTS); IPR006026 (SMART); IPR024079 (G3DSA:3.40.390.GENE3D); IPR001506 (PFAM); PTHR10127 (PANTHER); TRANSMEMBRANE (PHOBIUS); SIGNAL_PEPTIDE (PHOBIUS); NON_CYTOPLASMIC_DOMAIN (PHOBIUS); CYTOPLASMIC_DOMAIN (PHOBIUS); SIGNAL_PEPTIDE_N_REGION (PHOBIUS); SIGNAL_PEPTIDE_C_REGION (PHOBIUS); SIGNAL_PEPTIDE_H_REGION (PHOBIUS); SignalP-noTM (SIGNALP_EUK); SSF55486 (SUPERFAMILY); TMhelix (TMHMM); TMhelix (TMHMM)                                                                                                                                                                                                                                                                                                                                                                                                                                                                                                         |
| 1669 | c3859_g1_i1_len_1279_path_1_0_329_331_3<br>30_1278_5                                                     | 7814 | hemagglutinin amebocyte aggregation factor-like      | 426  | 1.74E-40  | 60.30% | 0.217   | PF14704 (PFAM); IPR026645 (PANTHER); CYTOPLASMIC_DOMAIN (PHOBIUS); TRANSMEMBRANE (PHOBIUS); NON_CYTOPLASMIC_DOMAIN (PHOBIUS); TMhelix (TMHMM)                                                                                                                                                                                                                                                                                                                                                                                                                                                                                                                                                                                                                                                                                                                                                                                             |
| 1668 | c38597_g1_i1_len_2272_path_209_0_2271_1                                                                  | 1567 | von willebrand factor like 1                         | 757  | 5.51E-21  | 40.50% | 0.101   | TRANSMEMBRANE (PHOBIUS); CYTOPLASMIC_DOMAIN (PHOBIUS); NON_CYTOPLASMIC_DOMAIN (PHOBIUS); IPR001007 (PROSITE_PROFILES); IPR006207 (PROSITE_PROFILES); TMhelix (TMHMM)                                                                                                                                                                                                                                                                                                                                                                                                                                                                                                                                                                                                                                                                                                                                                                      |
| 1670 | c38613_g1_i1_len_2514_path_305_0_11_317<br>12_28_5627_29_30_5629_31_34_5633_35_<br>36_3027_37_2513_5     | 162  | hemicentin-1 isoform x2                              | 838  | 4.93E-81  | 58.60% | 0.249   | IPR003598 (SMART); IPR013783 (G3DSA:2.60.40.GENE3D); IPR013783 (G3DSA:2.60.40.GENE3D); PF13927 (PFAM); PTHR11640:SF6 (PANTHER); PTHR11640 (PANTHER); NON_CYTOPLASMIC_DOMAIN (PHOBIUS); CYTOPLASMIC_DOMAIN (PHOBIUS); NON_CYTOPLASMIC_DOMAIN (PHOBIUS); CYTOPLASMIC_DOMAIN (PHOBIUS); TRANSMEMBRANE (PHOBIUS); TRANSMEMBRANE (PHOBIUS); TRANSMEMBRANE (PHOBIUS); IPR007110 (PROSITE_PROFILES); IPR007110 (PROSITE_PROFILES); SSF48726 (SUPERFAMILY); SSF48726 (SUPERFAMILY); TMhelix (TMHMM)                                                                                                                                                                                                                                                                                                                                                                                                                                               |
| 1671 | c38616_g1_i1_len_1686_path_203_0_60_263<br>61_63_202_64_1685_2                                           | 618  | alpha-aminoadipic semialdehyde dehydrogenase         | 562  | 0         | 83.70% | 0.129   | IPR016163 (G3DSA:3.40.309.GENE3D); IPR016162 (G3DSA:3.40.605.GENE3D); IPR015590 (PFAM); PTHR11699 (PANTHER); PTHR11699:SF144 (PANTHER); IPR029510 (PROSITE_PATTERNS); IPR016161 (SUPERFAMILY)                                                                                                                                                                                                                                                                                                                                                                                                                                                                                                                                                                                                                                                                                                                                             |

|      |                                                                                                     |      |                             |      |   |        |        |                                                                                                                                                                                                                                                                                                                                                                                                                                                                                                                                                                                                                                                                                                                                                                                                                                                                                                                                                                                                                                                                                                                                |
|------|-----------------------------------------------------------------------------------------------------|------|-----------------------------|------|---|--------|--------|--------------------------------------------------------------------------------------------------------------------------------------------------------------------------------------------------------------------------------------------------------------------------------------------------------------------------------------------------------------------------------------------------------------------------------------------------------------------------------------------------------------------------------------------------------------------------------------------------------------------------------------------------------------------------------------------------------------------------------------------------------------------------------------------------------------------------------------------------------------------------------------------------------------------------------------------------------------------------------------------------------------------------------------------------------------------------------------------------------------------------------|
| 1672 | c38634_g1_i1_len_2109_path_22_0_1407_1430_1408_1489_1512_1490_2108_2                                | 7489 | protein disulfide-isomerase | 696  | 0 | 80.70% | 0.668Y | PR00421 (PRINTS); IPR013766 (PFAM); IPR005788 (TIGRFAM); IPR012336 (G3DSA:3.40.30.GENE3D); IPR005792 (TIGRFAM); PF13848 (PFAM); IPR012336 (G3DSA:3.40.30.GENE3D); PTHR18929 (PANTHER); PTHR18929:SF48 (PANTHER); IPR017937 (PROSITE_PATTERNS); IPR017937 (PROSITE_PATTERNS); SIGNAL_PEPTIDE_H_REGION (PHOBIUS); SIGNAL_PEPTIDE_C_REGION (PHOBIUS); NON_CYTOPLASMIC_DOMAIN (PHOBIUS); SIGNAL_PEPTIDE (PHOBIUS); SIGNAL_PEPTIDE_N_REGION (PHOBIUS); IPR012336 (PROSITE_PROFILES); IPR012336 (PROSITE_PROFILES); SignalP-noTM (SIGNALP_EUK); IPR012336 (SUPERFAMILY); IPR012336 (SUPERFAMILY); IPR012336 (SUPERFAMILY); IPR012336 (SUPERFAMILY)                                                                                                                                                                                                                                                                                                                                                                                                                                                                                   |
| 1673 | c38634_g1_i2_len_2166_path_22_0_1407_6940_1408_1473_7006_1474_1497_10648_1498_1546_1512_1547_2165_2 | 7180 | disulfide isomerase         | 715  | 0 | 80.20% | 0.668Y | PR00421 (PRINTS); IPR005792 (TIGRFAM); IPR012336 (G3DSA:3.40.30.GENE3D); IPR013766 (PFAM); PF13848 (PFAM); IPR005788 (TIGRFAM); IPR012336 (G3DSA:3.40.30.GENE3D); PTHR18929 (PANTHER); PTHR18929:SF48 (PANTHER); IPR017937 (PROSITE_PATTERNS); IPR017937 (PROSITE_PATTERNS); SIGNAL_PEPTIDE_N_REGION (PHOBIUS); SIGNAL_PEPTIDE (PHOBIUS); NON_CYTOPLASMIC_DOMAIN (PHOBIUS); SIGNAL_PEPTIDE_H_REGION (PHOBIUS); SIGNAL_PEPTIDE_C_REGION (PHOBIUS); IPR012336 (PROSITE_PROFILES); IPR012336 (PROSITE_PROFILES); SignalP-noTM (SIGNALP_EUK); IPR012336 (SUPERFAMILY); IPR012336 (SUPERFAMILY); IPR012336 (SUPERFAMILY); IPR012336 (SUPERFAMILY)                                                                                                                                                                                                                                                                                                                                                                                                                                                                                   |
| 1674 | c38687_g1_i1_len_4629_path_1_0_2056_2058_2057_2362_2397_2363_4284_4319_4285_4287_4322_4288_4628_3   | 812  | fasciclin-2 isoform x2      | 1543 | 0 | 58.70% | 0.166  | IPR009138 (PRINTS); IPR003599 (SMART); IPR003598 (SMART); IPR003961 (SMART); IPR013783 (G3DSA:2.60.40.GENE3D); IPR013783 (G3DSA:2.60.40.GENE3D); IPR013783 (G3DSA:2.60.40.GENE3D); PF13927 (PFAM); IPR013783 (G3DSA:2.60.40.GENE3D); PF13895 (PFAM); IPR003961 (PFAM); IPR013098 (PFAM); IPR013783 (G3DSA:2.60.40.GENE3D); PTHR10489 (PANTHER); PTHR10489:SF556 (PANTHER); NON_CYTOPLASMIC_DOMAIN (PHOBIUS); NON_CYTOPLASMIC_DOMAIN (PHOBIUS); TRANSMEMBRANE (PHOBIUS); TRANSMEMBRANE (PHOBIUS); TRANSMEMBRANE (PHOBIUS); TRANSMEMBRANE (PHOBIUS); NON_CYTOPLASMIC_DOMAIN (PHOBIUS); TRANSMEMBRANE (PHOBIUS); CYTOPLASMIC_DOMAIN (PHOBIUS); NON_CYTOPLASMIC_DOMAIN (PHOBIUS); CYTOPLASMIC_DOMAIN (PHOBIUS); CYTOPLASMIC_DOMAIN (PHOBIUS); IPR007110 (PROSITE_PROFILES); IPR003961 (PROSITE_PROFILES); IPR007110 (PROSITE_PROFILES); IPR007110 (PROSITE_PROFILES); IPR007110 (PROSITE_PROFILES); IPR007110 (PROSITE_PROFILES); IPR003961 (PROSITE_PROFILES); SSF48726 (SUPERFAMILY); SSF48726 (SUPERFAMILY); SSF48726 (SUPERFAMILY); SSF48726 (SUPERFAMILY); TMhelix (TMHMM); TMhelix (TMHMM); TMhelix (TMHMM); TMhelix (TMHMM) |
| 1675 | c38687_g1_i2_len_2716_path_9279_0_415_9695_416_416_2364_417_448_2396_449_449_2397_450_2371_4319_3   | 481  | fascilin 2-like protein     | 906  | 0 | 59.70% | 0.166  | IPR009138 (PRINTS); IPR003599 (SMART); IPR003961 (SMART); IPR003598 (SMART); IPR013783 (G3DSA:2.60.40.GENE3D); IPR013783 (G3DSA:2.60.40.GENE3D); IPR013783 (G3DSA:2.60.40.GENE3D); PF13895 (PFAM); IPR003961 (PFAM); IPR013098 (PFAM); IPR013783 (G3DSA:2.60.40.GENE3D); IPR013783 (G3DSA:2.60.40.GENE3D); PF13927 (PFAM); PTHR10489:SF556 (PANTHER); PTHR10489 (PANTHER); NON_CYTOPLASMIC_DOMAIN (PHOBIUS); TRANSMEMBRANE (PHOBIUS); CYTOPLASMIC_DOMAIN (PHOBIUS); IPR007110 (PROSITE_PROFILES); IPR007110 (PROSITE_PROFILES); IPR007110 (PROSITE_PROFILES); IPR003961 (PROSITE_PROFILES); IPR003961 (PROSITE_PROFILES); IPR007110 (PROSITE_PROFILES); IPR007110 (PROSITE_PROFILES); SSF48726 (SUPERFAMILY); SSF48726 (SUPERFAMILY); SSF48726 (SUPERFAMILY); SSF48726 (SUPERFAMILY)                                                                                                                                                                                                                                                                                                                                           |

|      |                                                                                                   |      |                                                |      |           |        |       |                                                                                                                                                                                                                                                                                                                                                                                                                                                                                                                                                                                                                                                                                                                                                                                                                                                                                                                                                                                                                                                                                                                                                                                                              |
|------|---------------------------------------------------------------------------------------------------|------|------------------------------------------------|------|-----------|--------|-------|--------------------------------------------------------------------------------------------------------------------------------------------------------------------------------------------------------------------------------------------------------------------------------------------------------------------------------------------------------------------------------------------------------------------------------------------------------------------------------------------------------------------------------------------------------------------------------------------------------------------------------------------------------------------------------------------------------------------------------------------------------------------------------------------------------------------------------------------------------------------------------------------------------------------------------------------------------------------------------------------------------------------------------------------------------------------------------------------------------------------------------------------------------------------------------------------------------------|
| 1676 | c38687_g1_i3_len_4662_path_1_0_2056_2058_2057_2362_2364_2363_2394_2396_2395_2395_2397_2396_4317_3 | 837  | fasciclin- partial                             | 1554 | 0         | 58.10% | 0.166 | IPR009138 (PRINTS); IPR003598 (SMART); IPR003961 (SMART); IPR003599 (SMART); IPR003961 (PFAM); IPR013783 (G3DSA:2.60.40.GENE3D); IPR013783 (G3DSA:2.60.40.GENE3D); PF13927 (PFAM); IPR013783 (G3DSA:2.60.40.GENE3D); IPR013098 (PFAM); IPR013783 (G3DSA:2.60.40.GENE3D); PF13895 (PFAM); IPR013783 (G3DSA:2.60.40.GENE3D); IPR013783 (G3DSA:2.60.40.GENE3D); PTHR10489:SF556 (PANTHER); PTHR10489 (PANTHER); NON_CYTOPLASMIC_DOMAIN (PHOBIUS); NON_CYTOPLASMIC_DOMAIN (PHOBIUS); TRANSMEMBRANE (PHOBIUS); CYTOPLASMIC_DOMAIN (PHOBIUS); TRANSMEMBRANE (PHOBIUS); NON_CYTOPLASMIC_DOMAIN (PHOBIUS); NON_CYTOPLASMIC_DOMAIN (PHOBIUS); CYTOPLASMIC_DOMAIN (PHOBIUS); TRANSMEMBRANE (PHOBIUS); TRANSMEMBRANE (PHOBIUS); TRANSMEMBRANE (PHOBIUS); TRANSMEMBRANE (PHOBIUS); IPR007110 (PROSITE_PROFILES); IPR007110 (PROSITE_PROFILES); IPR003961 (PROSITE_PROFILES); IPR007110 (PROSITE_PROFILES); IPR003961 (PROSITE_PROFILES); IPR007110 (PROSITE_PROFILES); IPR007110 (PROSITE_PROFILES); SSF48726 (SUPERFAMILY); SSF48726 (SUPERFAMILY); IPR003961 (SUPERFAMILY); SSF48726 (SUPERFAMILY); SSF48726 (SUPERFAMILY); SSF48726 (SUPERFAMILY); TMhelix (TMHMM); TMhelix (TMHMM); TMhelix (TMHMM); TMhelix (TMHMM) |
| 1677 | c38687_g1_i4_len_2683_path_9279_0_415_2396_416_416_2397_417_2338_4319_2339_2341_4322_2342_2682_3  | 466  | fascilin 2-like protein                        | 895  | 0         | 59.40% | 0.166 | IPR009138 (PRINTS); IPR003961 (SMART); IPR003598 (SMART); IPR003599 (SMART); IPR013098 (PFAM); IPR003961 (PFAM); IPR013783 (G3DSA:2.60.40.GENE3D); PF13927 (PFAM); IPR013783 (G3DSA:2.60.40.GENE3D); PF13895 (PFAM); IPR013783 (G3DSA:2.60.40.GENE3D); IPR013783 (G3DSA:2.60.40.GENE3D); IPR013783 (G3DSA:2.60.40.GENE3D); PTHR10489 (PANTHER); PTHR10489:SF556 (PANTHER); NON_CYTOPLASMIC_DOMAIN (PHOBIUS); TRANSMEMBRANE (PHOBIUS); CYTOPLASMIC_DOMAIN (PHOBIUS); IPR007110 (PROSITE_PROFILES); IPR007110 (PROSITE_PROFILES); IPR007110 (PROSITE_PROFILES); IPR003961 (PROSITE_PROFILES); IPR007110 (PROSITE_PROFILES); IPR007110 (PROSITE_PROFILES); IPR003961 (PROSITE_PROFILES); SSF48726 (SUPERFAMILY); SSF48726 (SUPERFAMILY); SSF48726 (SUPERFAMILY); SSF48726 (SUPERFAMILY); IPR003961 (SUPERFAMILY); SSF48726 (SUPERFAMILY)                                                                                                                                                                                                                                                                                                                                                                        |
| 1678 | c38706_g1_i1_len_2137_path_2052_0_1967_4210_1968_2030_4020_2031_2136_5                            | 250  | peptidyl-prolyl cis-trans isomerase fkbp4-like | 712  | 0         | 73.80% | 0.107 | Coil (COILS); IPR019734 (SMART); G3DSA:3.10.50.40 (GENE3D); IPR023114 (G3DSA:1.10.150.GENE3D); IPR001440 (PFAM); IPR011990 (G3DSA:1.25.40.GENE3D); IPR001179 (PFAM); G3DSA:3.10.50.40 (GENE3D); PF13414 (PFAM); IPR023566 (PANTHER); PTHR10516:SF274 (PANTHER); NON_CYTOPLASMIC_DOMAIN (PHOBIUS); TRANSMEMBRANE (PHOBIUS); CYTOPLASMIC_DOMAIN (PHOBIUS); IPR013026 (PROSITE_PROFILES); IPR019734 (PROSITE_PROFILES); IPR013026 (PROSITE_PROFILES); IPR001179 (PROSITE_PROFILES); IPR019734 (PROSITE_PROFILES); SSF54534 (SUPERFAMILY); SSF54534 (SUPERFAMILY); SSF48452 (SUPERFAMILY); TMhelix (TMHMM)                                                                                                                                                                                                                                                                                                                                                                                                                                                                                                                                                                                                       |
| 1679 | c38706_g1_i2_len_2074_path_2052_0_1967_4020_1968_2073_5                                           | 250  | peptidyl-prolyl cis-trans isomerase fkbp4-like | 691  | 0         | 73.80% | 0.11  | Coil (COILS); IPR019734 (SMART); IPR011990 (G3DSA:1.25.40.GENE3D); IPR001440 (PFAM); G3DSA:3.10.50.40 (GENE3D); IPR023114 (G3DSA:1.10.150.GENE3D); IPR001179 (PFAM); G3DSA:3.10.50.40 (GENE3D); PF13414 (PFAM); IPR023566 (PANTHER); PTHR10516:SF274 (PANTHER); NON_CYTOPLASMIC_DOMAIN (PHOBIUS); TRANSMEMBRANE (PHOBIUS); CYTOPLASMIC_DOMAIN (PHOBIUS); IPR019734 (PROSITE_PROFILES); IPR019734 (PROSITE_PROFILES); IPR013026 (PROSITE_PROFILES); IPR001179 (PROSITE_PROFILES); IPR001179 (PROSITE_PROFILES); IPR019734 (PROSITE_PROFILES); IPR013026 (PROSITE_PROFILES); SignalP-TM (SIGNALP_GRAM_POSITIVE); SSF54534 (SUPERFAMILY); SSF48452 (SUPERFAMILY); SSF54534 (SUPERFAMILY); TMhelix (TMHMM)                                                                                                                                                                                                                                                                                                                                                                                                                                                                                                       |
| 1680 | c38707_g1_i1_len_1444_path_1_0_1443_5                                                             | 1457 | thioredoxin peroxidase                         | 481  | 1.90E-117 | 88.20% | 0.104 | IPR019479 (PFAM); IPR012336 (G3DSA:3.40.30.GENE3D); IPR000866 (PFAM); PTHR10681 (PANTHER); PTHR10681:SF101 (PANTHER); IPR012336 (PROSITE_PROFILES); IPR012336 (SUPERFAMILY)                                                                                                                                                                                                                                                                                                                                                                                                                                                                                                                                                                                                                                                                                                                                                                                                                                                                                                                                                                                                                                  |

|      |                                                                                                               |       |                                            |      |           |        |       |                                                                                                                                                                                                                                                                                                                                                                                                                                                                                                                                                                                                                                                              |
|------|---------------------------------------------------------------------------------------------------------------|-------|--------------------------------------------|------|-----------|--------|-------|--------------------------------------------------------------------------------------------------------------------------------------------------------------------------------------------------------------------------------------------------------------------------------------------------------------------------------------------------------------------------------------------------------------------------------------------------------------------------------------------------------------------------------------------------------------------------------------------------------------------------------------------------------------|
| 1681 | c38806_g1_i2_len_6682_path_9297_0_867_1<br>5778_868_897_10165_898_6293_15558_629<br>4_6483_1609_6484_6491_1_1 | 2169  | myosin heavy non-muscle-like               | 2227 | 0         | 89.10% | 0.187 | Coil (COILS); Coil (COILS); Coil (COILS); Coil (COILS); Coil (COILS); Coil (COILS);<br>Coil (COILS); Coil (COILS); Coil (COILS); Coil (COILS); Coil (COILS); Coil (COILS);<br>Coil (COILS); IPR001609 (PRINTS); IPR001609 (SMART); IPR027401<br>(G3DSA:4.10.270.GENE3D); IPR004009 (PFAM); IPR001609 (PFAM);<br>G3DSA:1.20.5.340 (GENE3D); IPR002928 (PFAM); PTHR13140 (PANTHER);<br>PTHR13140:SF301 (PANTHER); IPR000048 (PROSITE_PROFILES); IPR001609<br>(PROSITE_PROFILES); SSF90257 (SUPERFAMILY); SSF90257 (SUPERFAMILY);<br>SSF90257 (SUPERFAMILY); SSF57997 (SUPERFAMILY); IPR027417<br>(SUPERFAMILY); SSF90257 (SUPERFAMILY)                         |
| 1682 | c38806_g1_i3_len_6652_path_9297_0_867_1<br>0165_868_6263_15558_6264_6453_1609_64<br>54_6461_15558_6462_6651_1 | 2157  | myosin heavy non-muscle-like isoform 2     | 2217 | 0         | 89.60% | 0.187 | Coil (COILS); Coil (COILS); Coil (COILS); Coil (COILS); Coil (COILS); Coil (COILS);<br>Coil (COILS); Coil (COILS); Coil (COILS); Coil (COILS); Coil (COILS); Coil (COILS);<br>Coil (COILS); IPR001609 (PRINTS); IPR001609 (SMART); IPR002928 (PFAM);<br>IPR001609 (PFAM); IPR004009 (PFAM); IPR027401 (G3DSA:4.10.270.GENE3D);<br>G3DSA:1.20.5.340 (GENE3D); PTHR13140 (PANTHER); PTHR13140:SF301<br>(PANTHER); IPR000048 (PROSITE_PROFILES); IPR001609<br>(PROSITE_PROFILES); SSF90257 (SUPERFAMILY); SSF90257 (SUPERFAMILY);<br>IPR027417 (SUPERFAMILY); SSF90257 (SUPERFAMILY); SSF90257<br>(SUPERFAMILY); SSF90257 (SUPERFAMILY); SSF57997 (SUPERFAMILY) |
| 1683 | c38809_g1_i1_len_747_path_4711_0_746_2                                                                        | 129   | membrane metallo-endopeptidase-like 1-like | 249  | 2.06E-28  | 54.70% | 0.133 | IPR008753 (PFAM); G3DSA:1.10.1380.10 (GENE3D); IPR000718 (PANTHER);<br>NON_CYTOPLASMIC_DOMAIN (PHOBIUS); TRANSMEMBRANE (PHOBIUS);<br>CYTOPLASMIC_DOMAIN (PHOBIUS); SSF55486 (SUPERFAMILY)                                                                                                                                                                                                                                                                                                                                                                                                                                                                    |
| 1684 | c38809_g2_i1_len_2276_path_53_0_684_738<br>685_2275_1                                                         | 320   | membrane metallo-endopeptidase-like 1-like | 759  | 9.70E-163 | 62.20% | 0.123 | IPR018497 (PRINTS); IPR018497 (PFAM); IPR008753 (PFAM); IPR024079<br>(G3DSA:3.40.390.GENE3D); IPR000718 (PANTHER); SSF55486 (SUPERFAMILY)                                                                                                                                                                                                                                                                                                                                                                                                                                                                                                                    |
| 1685 | c38812_g2_i1_len_3652_path_206_0_557_76<br>2_558_599_804_600_1255_1459_1256_125<br>8_98_1259_1913_211_5       | 434   | membrane metallo-endopeptidase-like 1      | 1217 | 1.02E-99  | 47.50% | 0.098 | IPR018497 (PRINTS); IPR018497 (PFAM); IPR008753 (PFAM); IPR024079<br>(G3DSA:3.40.390.GENE3D); IPR000718 (PANTHER); SSF55486 (SUPERFAMILY)                                                                                                                                                                                                                                                                                                                                                                                                                                                                                                                    |
| 1686 | c38819_g1_i1_len_1853_path_103_0_1852_4                                                                       | 11265 | cre-nas-15 protein                         | 618  | 1.06E-60  | 57.90% | 0.229 | IPR001506 (PRINTS); IPR006026 (SMART); IPR024079<br>(G3DSA:3.40.390.GENE3D); IPR001506 (PFAM); PTHR10127 (PANTHER);<br>NON_CYTOPLASMIC_DOMAIN (PHOBIUS); TRANSMEMBRANE (PHOBIUS);<br>TRANSMEMBRANE (PHOBIUS); NON_CYTOPLASMIC_DOMAIN (PHOBIUS);<br>TRANSMEMBRANE (PHOBIUS); CYTOPLASMIC_DOMAIN (PHOBIUS);<br>CYTOPLASMIC_DOMAIN (PHOBIUS); SSF55486 (SUPERFAMILY); TMhelix<br>(TMHMM); TMhelix (TMHMM)                                                                                                                                                                                                                                                       |
| 1687 | c38843_g1_i2_len_1756_path_53_0_853_905<br>854_1018_1070_1019_1374_1426_1375_17<br>55_0                       | 226   | abhydrolase domain-containing protein 16a  | 586  | 0         | 68.90% | 0.118 | IPR029059 (PFAM); IPR029058 (G3DSA:3.40.50.GENE3D); PTHR12277<br>(PANTHER); PTHR12277:SF44 (PANTHER); TRANSMEMBRANE (PHOBIUS);<br>NON_CYTOPLASMIC_DOMAIN (PHOBIUS); NON_CYTOPLASMIC_DOMAIN<br>(PHOBIUS); CYTOPLASMIC_DOMAIN (PHOBIUS); TRANSMEMBRANE<br>(PHOBIUS); IPR029058 (SUPERFAMILY); TMhelix (TMHMM); TMhelix (TMHMM)                                                                                                                                                                                                                                                                                                                                 |
| 1688 | c38846_g1_i1_len_2915_path_53_0_2914_0                                                                        | 10690 | cathepsin d                                | 972  | 0         | 80.50% | 0.164 | IPR001461 (PRINTS); IPR021109 (G3DSA:2.40.70.GENE3D); IPR012848 (PFAM);<br>IPR021109 (G3DSA:2.40.70.GENE3D); IPR001461 (PFAM); IPR001461<br>(PANTHER); PTHR13683:SF230 (PANTHER); IPR001969 (PROSITE_PATTERNS);<br>IPR001969 (PROSITE_PATTERNS); TRANSMEMBRANE (PHOBIUS);<br>NON_CYTOPLASMIC_DOMAIN (PHOBIUS); NON_CYTOPLASMIC_DOMAIN<br>(PHOBIUS); CYTOPLASMIC_DOMAIN (PHOBIUS); TRANSMEMBRANE<br>(PHOBIUS); CYTOPLASMIC_DOMAIN (PHOBIUS); TRANSMEMBRANE<br>(PHOBIUS); IPR021109 (SUPERFAMILY); TMhelix (TMHMM); TMhelix (TMHMM);<br>TMhelix (TMHMM)                                                                                                        |

|      |                                                                                                    |      |  |                              |      |           |        |       |                                                                                                                                                                                                                                                                                                                                                                                                                                                                                                                                                                                                                                                                                                                                                                                                                                                          |
|------|----------------------------------------------------------------------------------------------------|------|--|------------------------------|------|-----------|--------|-------|----------------------------------------------------------------------------------------------------------------------------------------------------------------------------------------------------------------------------------------------------------------------------------------------------------------------------------------------------------------------------------------------------------------------------------------------------------------------------------------------------------------------------------------------------------------------------------------------------------------------------------------------------------------------------------------------------------------------------------------------------------------------------------------------------------------------------------------------------------|
| 1689 | c38867_g1_i1_len_3690_path_3902_0_1154_5057_1155_1157_5060__1158_3505_134_35_06_3689_2             | 331  |  | zinc finger protein 676-like | 1230 | 2.13E-75  | 60.70% | 0.146 | Coil (COILS); IPR015880 (SMART); IPR013087 (G3DSA:3.30.160.GENE3D); PF13894 (PFAM); IPR013087 (G3DSA:3.30.160.GENE3D); IPR013087 (G3DSA:3.30.160.GENE3D); IPR007087 (PFAM); PF13465 (PFAM); IPR013087 (G3DSA:3.30.160.GENE3D); PTHR24409 (PANTHER); IPR007087 (PROSITE_PATTERNS); IPR007087 (PROSITE_PROFILES); SSF57667 (SUPERFAMILY); SSF57667 (SUPERFAMILY); SSF57667 (SUPERFAMILY) |
| 1690 | c38876_g1_i1_len_2885_path_225_0_2459_2_678_2460_2468_68_2469_2741_5996_2742_2758_2976_2759_2884_4 | 1695 |  | moxd1 homolog 2              | 962  | 1.42E-124 | 56.20% | 0.239 | IPR000945 (PRINTS); IPR005018 (SMART); IPR000323 (G3DSA:2.60.120.GENE3D); PF03712 (PFAM); IPR015920 (G3DSA:2.60.40.GENE3D); IPR005018 (PFAM); IPR014784 (G3DSA:2.60.120.GENE3D); IPR000323 (PFAM); IPR000945 (PANTHER); PTHR10157-SF23 (PANTHER); NON_CYTOPLASMIC_DOMAIN (PHOBIUS); TRANSMEMBRANE (PHOBIUS); TRANSMEMBRANE (PHOBIUS); CYTOPLASMIC_DOMAIN (PHOBIUS); TRANSMEMBRANE (PHOBIUS); TRANSMEMBRANE (PHOBIUS); NON_CYTOPLASMIC_DOMAIN (PHOBIUS); CYTOPLASMIC_DOMAIN (PHOBIUS); CYTOPLASMIC_DOMAIN (PHOBIUS); IPR005018 (PROSITE_PROFILES); IPR008977 (SUPERFAMILY); SSF49344 (SUPERFAMILY); IPR008977 (SUPERFAMILY); TMhelix (TMHMM); TMhelix (TMHMM)                                                                                                                                                                                             |
| 1691 | c38902_g1_i1_len_1516_path_1494_0_574_2_069_575_1515_2                                             | 411  |  | late trypsin                 | 505  | 6.58E-48  | 55.70% | 0.304 | IPR001314 (PRINTS); IPR001254 (SMART); IPR001254 (PFAM); G3DSA:2.40.10.10 (GENE3D); G3DSA:2.40.10.10 (GENE3D); G3DSA:2.40.10.10 (GENE3D); PTHR24268 (PANTHER); IPR018114 (PROSITE_PATTERNS); IPR018114 (PROSITE_PATTERNS); TRANSMEMBRANE (PHOBIUS); CYTOPLASMIC_DOMAIN (PHOBIUS); CYTOPLASMIC_DOMAIN (PHOBIUS); TRANSMEMBRANE (PHOBIUS); NON_CYTOPLASMIC_DOMAIN (PHOBIUS); IPR001254 (PROSITE_PROFILES); IPR009003 (SUPERFAMILY)                                                                                                                                                                                                                                                                                                                                                                                                                         |
| 1692 | c38905_g4_i1_len_2359_path_1785_0_1342_3128_1343_2358_4                                            | 286  |  | striatin- partial            | 773  | 0         | 75.40% | 0.1   | Coil (COILS); IPR020472 (PRINTS); IPR001680 (SMART); IPR001680 (PFAM); IPR013258 (PFAM); IPR015943 (G3DSA:2.130.10.GENE3D); PTHR15653 (PANTHER); IPR019775 (PROSITE_PATTERNS); IPR019775 (PROSITE_PATTERNS); CYTOPLASMIC_DOMAIN (PHOBIUS); NON_CYTOPLASMIC_DOMAIN (PHOBIUS); TRANSMEMBRANE (PHOBIUS); IPR001680 (PROSITE_PROFILES); IPR001680 (PROSITE_PROFILES); IPR017986 (PROSITE_PROFILES); IPR001680 (PROSITE_PROFILES); IPR001680 (PROSITE_PROFILES); IPR017986 (SUPERFAMILY); TMhelix (TMHMM)                                                                                                                                                                                                                                                                                                                                                     |
| 1693 | c38905_g4_i2_len_2476_path_1785_0_1342_9176_1343_1459_3128_1460_2475_4                             | 296  |  | striatin-3-like isoform x1   | 812  | 0         | 73.40% | 0.1   | Coil (COILS); IPR020472 (PRINTS); IPR001680 (SMART); IPR013258 (PFAM); IPR001680 (PFAM); IPR015943 (G3DSA:2.130.10.GENE3D); PTHR15653 (PANTHER); IPR019775 (PROSITE_PATTERNS); IPR019775 (PROSITE_PATTERNS); NON_CYTOPLASMIC_DOMAIN (PHOBIUS); TRANSMEMBRANE (PHOBIUS); CYTOPLASMIC_DOMAIN (PHOBIUS); IPR001680 (PROSITE_PROFILES); IPR001680 (PROSITE_PROFILES); IPR001680 (PROSITE_PROFILES); IPR017986 (PROSITE_PROFILES); IPR001680 (PROSITE_PROFILES); IPR017986 (SUPERFAMILY); TMhelix (TMHMM)                                                                                                                                                                                                                                                                                                                                                     |



|      |                                                                                                     |      |                                                                                   |      |           |        |         |                                                                                                                                                                                                                                                                                                                                                                                                                                                                                                                                                                                                                                                                                                                                                                                         |
|------|-----------------------------------------------------------------------------------------------------|------|-----------------------------------------------------------------------------------|------|-----------|--------|---------|-----------------------------------------------------------------------------------------------------------------------------------------------------------------------------------------------------------------------------------------------------------------------------------------------------------------------------------------------------------------------------------------------------------------------------------------------------------------------------------------------------------------------------------------------------------------------------------------------------------------------------------------------------------------------------------------------------------------------------------------------------------------------------------------|
| 1694 | c38933_g1_i1_len_3472_path_121_0_1196_1_317_1197_1205_34_1206_3471_1                                | 6313 | ferritin 1-like protein a                                                         | 1157 | 4.13E-43  | 65.40% | 0.167   | IPR012347 (G3DSA:1.20.1260.GENE3D); IPR008331 (PFAM); PTHR11431:SF29 (PANTHER); IPR001519 (PANTHER); NON_CYTOPLASMIC_DOMAIN (PHOBIUS); TRANSMEMBRANE (PHOBIUS); NON_CYTOPLASMIC_DOMAIN (PHOBIUS); TRANSMEMBRANE (PHOBIUS); CYTOPLASMIC_DOMAIN (PHOBIUS); TRANSMEMBRANE (PHOBIUS); TRANSMEMBRANE (PHOBIUS); CYTOPLASMIC_DOMAIN (PHOBIUS); NON_CYTOPLASMIC_DOMAIN (PHOBIUS); TRANSMEMBRANE (PHOBIUS); CYTOPLASMIC_DOMAIN (PHOBIUS); IPR009040 (PROSITE_PROFILES); IPR009078 (SUPERFAMILY); TMhelix (TMHMM); TMhelix (TMHMM); TMhelix (TMHMM); TMhelix (TMHMM);                                                                                                                                                                                                                            |
| 1695 | c38943_g1_i1_len_3300_path_5335_0_2690_8024_2691_3087_77_3088_3299_3                                | 907  | a disintegrin and metalloproteinase with thrombospondin motifs 18 isoform x1      | 1100 | 1.74E-101 | 66.80% | 0.128   | IPR024079 (G3DSA:3.40.390.GENE3D); PTHR13723:SF148 (PANTHER); PTHR13723 (PANTHER); CYTOPLASMIC_DOMAIN (PHOBIUS); TRANSMEMBRANE (PHOBIUS); TRANSMEMBRANE (PHOBIUS); NON_CYTOPLASMIC_DOMAIN (PHOBIUS); NON_CYTOPLASMIC_DOMAIN (PHOBIUS); CYTOPLASMIC_DOMAIN (PHOBIUS); TRANSMEMBRANE (PHOBIUS); IPR001590 (PROSITE_PROFILES); SSF55486 (SUPERFAMILY); TMhelix (TMHMM); TMhelix (TMHMM); TMhelix (TMHMM)                                                                                                                                                                                                                                                                                                                                                                                   |
| 1696 | c38943_g1_i2_len_4894_path_5335_0_2690_10214_2691_2702_8024_2703_3099_8420_3100_3227_8548_3228_3_4  | 1149 | a disintegrin and metalloproteinase with thrombospondin motifs 16-like isoform x3 | 1631 | 0         | 65.20% | 0.114   | IPR024079 (G3DSA:3.40.390.GENE3D); PF13582 (PFAM); PTHR13723 (PANTHER); PTHR13723:SF148 (PANTHER); CYTOPLASMIC_DOMAIN (PHOBIUS); NON_CYTOPLASMIC_DOMAIN (PHOBIUS); NON_CYTOPLASMIC_DOMAIN (PHOBIUS); TRANSMEMBRANE (PHOBIUS); TRANSMEMBRANE (PHOBIUS); IPR001590 (PROSITE_PROFILES); SSF55486 (SUPERFAMILY); TMhelix (TMHMM); TMhelix (TMHMM)                                                                                                                                                                                                                                                                                                                                                                                                                                           |
| 1697 | c38943_g1_i3_len_4882_path_5335_0_2690_8024_2691_3087_8420_3088_3215_8548_3_216_3270_8603_3271_36_4 | 1201 | a disintegrin and metalloproteinase with thrombospondin motifs 16-like isoform x3 | 1627 | 0         | 65.70% | 0.114   | PF13582 (PFAM); IPR024079 (G3DSA:3.40.390.GENE3D); PTHR13723 (PANTHER); PTHR13723:SF148 (PANTHER); CYTOPLASMIC_DOMAIN (PHOBIUS); NON_CYTOPLASMIC_DOMAIN (PHOBIUS); TRANSMEMBRANE (PHOBIUS); NON_CYTOPLASMIC_DOMAIN (PHOBIUS); TRANSMEMBRANE (PHOBIUS); IPR001590 (PROSITE_PROFILES); SSF55486 (SUPERFAMILY); TMhelix (TMHMM); TMhelix (TMHMM)                                                                                                                                                                                                                                                                                                                                                                                                                                           |
| 1698 | c38949_g1_i1_len_1486_path_1_0_498_500_499_503_505_504_1485_2                                       | 932  | trypsinogen 2                                                                     | 495  | 4.14E-68  | 59.00% | 0.882 Y | IPR001314 (PRINTS); IPR001254 (SMART); G3DSA:2.40.10.10 (GENE3D); G3DSA:2.40.10.10 (GENE3D); IPR001254 (PFAM); G3DSA:2.40.10.10 (GENE3D); PTHR24265 (PANTHER); IPR018114 (PROSITE_PATTERNS); IPR018114 (PROSITE_PATTERNS); TRANSMEMBRANE (PHOBIUS); SIGNAL_PEPTIDE_N_REGION (PHOBIUS); SIGNAL_PEPTIDE (PHOBIUS); TRANSMEMBRANE (PHOBIUS); SIGNAL_PEPTIDE_H_REGION (PHOBIUS); SIGNAL_PEPTIDE_C_REGION (PHOBIUS); NON_CYTOPLASMIC_DOMAIN (PHOBIUS); NON_CYTOPLASMIC_DOMAIN (PHOBIUS); CYTOPLASMIC_DOMAIN (PHOBIUS); TRANSMEMBRANE (PHOBIUS); CYTOPLASMIC_DOMAIN (PHOBIUS); IPR001254 (PROSITE_PROFILES); SignalP-noTM (SIGNALP_GRAM_NEGATIVE); SignalP-noTM (SIGNALP_EUK); SignalP-TM (SIGNALP_GRAM_POSITIVE); IPR009003 (SUPERFAMILY); TMhelix (TMHMM); TMhelix (TMHMM); TMhelix (TMHMM) |
| 1699 | c38958_g1_i2_len_1698_path_1676_0_211_1_888_212_1264_2941_1265_1288_2965_1289_1377_3054_1378_1697_2 | 284  | bola-like protein 2-like                                                          | 566  | 1.16E-33  | 83.20% | 0.237   | IPR002634 (G3DSA:3.30.300.GENE3D); IPR002634 (PFAM); PTHR12735 (PANTHER); PTHR12735:SF2 (PANTHER); TRANSMEMBRANE (PHOBIUS); NON_CYTOPLASMIC_DOMAIN (PHOBIUS); CYTOPLASMIC_DOMAIN (PHOBIUS); TRANSMEMBRANE (PHOBIUS); TRANSMEMBRANE (PHOBIUS); CYTOPLASMIC_DOMAIN (PHOBIUS); IPR002634 (SUPERFAMILY)                                                                                                                                                                                                                                                                                                                                                                                                                                                                                     |
| 1700 | c38987_g1_i1_len_1434_path_1412_0_1433_1                                                            | 274  | #NAME?                                                                            | 478  | 1.19E-138 | 77.90% | 0.16    | IPR002347 (PRINTS); IPR016040 (G3DSA:3.40.50.GENE3D); PF13561 (PFAM); PTHR24315 (PANTHER); PTHR24315:SF2 (PANTHER); SSF51735 (SUPERFAMILY)                                                                                                                                                                                                                                                                                                                                                                                                                                                                                                                                                                                                                                              |
| 1701 | c38994_g1_i1_len_8051_path_139_0_5837_5_975_5838_6085_6223_6086_6874_7012_68_75_7403_86_7404_8050_2 | 1969 | muscle m-line assembly protein unc- partial                                       | 2683 | 1.64E-71  | 43.80% | 0.1     | Coil (COILS); Coil (COILS); IPR003599 (SMART); IPR003598 (SMART); IPR013098 (PFAM); IPR013783 (G3DSA:2.60.40.GENE3D); IPR020675 (PANTHER); TRANSMEMBRANE (PHOBIUS); NON_CYTOPLASMIC_DOMAIN (PHOBIUS); TRANSMEMBRANE (PHOBIUS); TRANSMEMBRANE (PHOBIUS); CYTOPLASMIC_DOMAIN (PHOBIUS); NON_CYTOPLASMIC_DOMAIN (PHOBIUS); TRANSMEMBRANE (PHOBIUS); CYTOPLASMIC_DOMAIN (PHOBIUS); NON_CYTOPLASMIC_DOMAIN (PHOBIUS); IPR007110 (PROSITE_PROFILES); SSF48726 (SUPERFAMILY)                                                                                                                                                                                                                                                                                                                   |
| 1702 | c39004_g1_i1_len_735_path_1015_0_144_11_58_145_734_1                                                | 1629 | carboxypeptidase b-like                                                           | 245  | 1.11E-71  | 66.70% | 0.146   | IPR000834 (SMART); IPR000834 (PFAM); G3DSA:3.40.630.10 (GENE3D); PTHR11705 (PANTHER); NON_CYTOPLASMIC_DOMAIN (PHOBIUS); CYTOPLASMIC_DOMAIN (PHOBIUS); TRANSMEMBRANE (PHOBIUS); SSF53187 (SUPERFAMILY); TMhelix (TMHMM)                                                                                                                                                                                                                                                                                                                                                                                                                                                                                                                                                                  |

|      |                                                                                                        |      |                                                           |      |           |        |         |                                                                                                                                                                                                                                                                                                                                                                                                                                                                                                                                                                                                         |
|------|--------------------------------------------------------------------------------------------------------|------|-----------------------------------------------------------|------|-----------|--------|---------|---------------------------------------------------------------------------------------------------------------------------------------------------------------------------------------------------------------------------------------------------------------------------------------------------------------------------------------------------------------------------------------------------------------------------------------------------------------------------------------------------------------------------------------------------------------------------------------------------------|
| 1703 | c39004_g1_i2_len_1365_path_1717_0_774_158_775_1364_1                                                   | 2573 | carboxypeptidase b-like                                   | 455  | 3.33E-120 | 64.20% | 0.25    | IPR000834 (PRINTS); IPR000834 (SMART); G3DSA:3.40.630.10 (GENE3D); IPR003146 (PFAM); IPR000834 (PFAM); IPR003146 (G3DSA:3.30.70.GENE3D); PTHR11705 (PANTHER); IPR000834 (PROSITE_PATTERNS); SSF53187 (SUPERFAMILY); IPR009020 (SUPERFAMILY)                                                                                                                                                                                                                                                                                                                                                             |
| 1704 | c39022_g1_i1_len_2028_path_275_0_415_68_8_416_423_222_424_2027_1                                       | 1365 | kielin chordin-like protein                               | 676  | 2.20E-27  | 39.20% | 0.784Y  | IPR001846 (SMART); G3DSA:2.10.70.10 (GENE3D); IPR001846 (PFAM); PTHR11339 (PANTHER); CYTOPLASMIC_DOMAIN (PHOBIUS); TRANSMEMBRANE (PHOBIUS); SIGNAL_PEPTIDE_C_REGION (PHOBIUS); CYTOPLASMIC_DOMAIN (PHOBIUS); SIGNAL_PEPTIDE_N_REGION (PHOBIUS); TRANSMEMBRANE (PHOBIUS); TRANSMEMBRANE (PHOBIUS); SIGNAL_PEPTIDE_H_REGION (PHOBIUS); SIGNAL_PEPTIDE (PHOBIUS); NON_CYTOPLASMIC_DOMAIN (PHOBIUS); NON_CYTOPLASMIC_DOMAIN (PHOBIUS); IPR001846 (PROSITE_PROFILES); SignalP-noTM (SIGNALP_GRAM_NEGATIVE); SignalP-noTM (SIGNALP_EUK); SignalP-TM (SIGNALP_GRAM_POSITIVE); TMhelix (TMHMM); TMhelix (TMHMM) |
| 1705 | c39025_g1_i1_len_4391_path_255_0_3581_3_828_3582_3584_46_3585_4291_4537_4292_4324_4537_4325_4357_453_1 | 8431 | von willebrand factor a domain-containing protein 7       | 1464 | 4.19E-88  | 44.90% | 0.11    | PF13519 (PFAM); PTHR14905 (PANTHER); NON_CYTOPLASMIC_DOMAIN (PHOBIUS); TRANSMEMBRANE (PHOBIUS); TRANSMEMBRANE (PHOBIUS); NON_CYTOPLASMIC_DOMAIN (PHOBIUS); CYTOPLASMIC_DOMAIN (PHOBIUS); IPR002035 (SUPERFAMILY); TMhelix (TMHMM); TMhelix (TMHMM)                                                                                                                                                                                                                                                                                                                                                      |
| 1706 | c39028_g1_i1_len_1208_path_1256_0_730_1_987_731_752_2009_753_1055_2624_1056_1207_0                     | 1213 | granulins- partial                                        | 403  | 3.58E-38  | 51.30% | 0.552Y  | IPR000118 (SMART); IPR000118 (PFAM); PTHR12274:SF1 (PANTHER); PTHR12274 (PANTHER); IPR000118 (PROSITE_PATTERNS); IPR000118 (PROSITE_PATTERNS); CYTOPLASMIC_DOMAIN (PHOBIUS); TRANSMEMBRANE (PHOBIUS); NON_CYTOPLASMIC_DOMAIN (PHOBIUS); TRANSMEMBRANE (PHOBIUS); NON_CYTOPLASMIC_DOMAIN (PHOBIUS); TRANSMEMBRANE (PHOBIUS); CYTOPLASMIC_DOMAIN (PHOBIUS); SignalP-noTM (SIGNALP_EUK); SSF57277 (SUPERFAMILY); TMhelix (TMHMM); TMhelix (TMHMM)                                                                                                                                                          |
| 1707 | c39028_g1_i2_len_1278_path_1256_0_730_1_987_731_752_2009_753_1055_2312_1056_1277_0                     | 1239 | granulins- partial                                        | 426  | 3.74E-38  | 51.80% | 0.552 Y | IPR000118 (SMART); IPR000118 (PFAM); PTHR12274:SF1 (PANTHER); PTHR12274 (PANTHER); IPR000118 (PROSITE_PATTERNS); IPR000118 (PROSITE_PATTERNS); CYTOPLASMIC_DOMAIN (PHOBIUS); CYTOPLASMIC_DOMAIN (PHOBIUS); NON_CYTOPLASMIC_DOMAIN (PHOBIUS); TRANSMEMBRANE (PHOBIUS); TRANSMEMBRANE (PHOBIUS); NON_CYTOPLASMIC_DOMAIN (PHOBIUS); TRANSMEMBRANE (PHOBIUS); SignalP-noTM (SIGNALP_EUK); SSF57277 (SUPERFAMILY); TMhelix (TMHMM)                                                                                                                                                                           |
| 1708 | c39031_g1_i1_len_680_path_658_0_62_2082_63_113_2125_114_120_2132_121_144_803_145_184_2219_185_212_8_5  | 30   | zinc finger protein gfi-1                                 | 226  | 1.85E-35  | 57.00% | 0.152   | IPR015880 (SMART); PF13912 (PFAM); IPR013087 (G3DSA:3.30.160.GENE3D); PF13465 (PFAM); IPR013087 (G3DSA:3.30.160.GENE3D); IPR013087 (G3DSA:3.30.160.GENE3D); PTHR24409 (PANTHER); IPR007087 (PROSITE_PATTERNS); IPR007087 (PROSITE_PATTERNS); IPR007087 (PROSITE_PATTERNS); IPR007087 (PROSITE_PATTERNS); IPR007087 (PROSITE_PROFILES); IPR007087 (PROSITE_PROFILES); IPR007087 (PROSITE_PROFILES); IPR007087 (PROSITE_PROFILES); SSF57667 (SUPERFAMILY); SSF57667 (SUPERFAMILY); SSF57667 (SUPERFAMILY)                                                                                                 |
| 1709 | c39036_g3_i1_len_2446_path_6815_0_2264_9076_2265_2266_9078_2267_2445_1                                 | 304  | er degradation-enhancing alpha-mannosidase-like protein 2 | 815  | 0         | 76.70% | 0.098   | IPR001382 (PRINTS); IPR001382 (G3DSA:1.50.10.GENE3D); IPR001382 (PFAM); PTHR11742:SF37 (PANTHER); IPR001382 (PANTHER); IPR001382 (SUPERFAMILY)                                                                                                                                                                                                                                                                                                                                                                                                                                                          |
| 1710 | c39039_g1_i2_len_1754_path_852_0_402_54_82_403_405_3007_406_1586_4187_1587_17_53_1                     | 482  | cytochrome p450 2j2                                       | 585  | 3.96E-104 | 58.60% | 0.122   | Coil (COILS); IPR001128 (PRINTS); IPR002401 (PRINTS); IPR001128 (PFAM); IPR001128 (G3DSA:1.10.630.GENE3D); PTHR24300 (PANTHER); NON_CYTOPLASMIC_DOMAIN (PHOBIUS); CYTOPLASMIC_DOMAIN (PHOBIUS); TRANSMEMBRANE (PHOBIUS); IPR001128 (SUPERFAMILY)                                                                                                                                                                                                                                                                                                                                                        |
| 1711 | c39039_g1_i3_len_1767_path_852_0_402_54_69_403_414_5481_415_415_5482_416_418_3007_419_1599_4187_1600_2 | 479  | cytochrome p450 2j2-like                                  | 589  | 1.42E-104 | 58.60% | 0.133   | Coil (COILS); IPR001128 (PRINTS); IPR002401 (PRINTS); IPR001128 (G3DSA:1.10.630.GENE3D); IPR001128 (PFAM); PTHR24300 (PANTHER); NON_CYTOPLASMIC_DOMAIN (PHOBIUS); TRANSMEMBRANE (PHOBIUS); TRANSMEMBRANE (PHOBIUS); NON_CYTOPLASMIC_DOMAIN (PHOBIUS); CYTOPLASMIC_DOMAIN (PHOBIUS); IPR001128 (SUPERFAMILY); TMhelix (TMHMM); TMhelix (TMHMM)                                                                                                                                                                                                                                                           |
| 1712 | c39042_g1_i1_len_1091_path_1819_0_105_3_05_106_127_696_128_467_368_468_746_2_560_747_1090_5            | 491  | peroxiredoxin partial                                     | 363  | 2.40E-115 | 83.50% | 0.189   | IPR000866 (PFAM); G3DSA:3.30.1020.10 (GENE3D); IPR012336 (G3DSA:3.40.30.GENE3D); IPR019479 (PFAM); PTHR10681:SF77 (PANTHER); PTHR10681 (PANTHER); CYTOPLASMIC_DOMAIN (PHOBIUS); TRANSMEMBRANE (PHOBIUS); NON_CYTOPLASMIC_DOMAIN (PHOBIUS); IPR012336 (PROSITE_PROFILES); IPR012336 (SUPERFAMILY); TMhelix (TMHMM)                                                                                                                                                                                                                                                                                       |

[illegible]

|      |                                                                                                               |     |                           |      |   |        |       |                                                                                                                                                                                                                                                                                                                                                                                                                                                                                                                                                                                                                                                                                                                                                                                                                                                                                                                                                                                                                                                                                                                                                                                                                                        |
|------|---------------------------------------------------------------------------------------------------------------|-----|---------------------------|------|---|--------|-------|----------------------------------------------------------------------------------------------------------------------------------------------------------------------------------------------------------------------------------------------------------------------------------------------------------------------------------------------------------------------------------------------------------------------------------------------------------------------------------------------------------------------------------------------------------------------------------------------------------------------------------------------------------------------------------------------------------------------------------------------------------------------------------------------------------------------------------------------------------------------------------------------------------------------------------------------------------------------------------------------------------------------------------------------------------------------------------------------------------------------------------------------------------------------------------------------------------------------------------------|
| 1717 | c39048_g1_i3_len_5023_path_209_0_1307_1<br>1116_1308_1309_1518_1310_1623_11139_1<br>624_1624_11140_1625_162_3 | 555 | neuroglian-like isoform 2 | 1675 | 0 | 77.50% | 0.292 | IPR003961 (SMART); IPR003598 (SMART); IPR003599 (SMART); PF13895 (PFAM); IPR003961 (PFAM); IPR013783 (G3DSA:2.60.40.GENE3D); IPR013098 (PFAM); IPR026966 (PFAM); PTHR10489 (PANTHER); PTHR10489:SF553 (PANTHER); TRANSMEMBRANE (PHOBIUS); CYTOPLASMIC_DOMAIN (PHOBIUS); TRANSMEMBRANE (PHOBIUS); CYTOPLASMIC_DOMAIN (PHOBIUS); NON_CYTOPLASMIC_DOMAIN (PHOBIUS); TRANSMEMBRANE (PHOBIUS); NON_CYTOPLASMIC_DOMAIN (PHOBIUS); IPR007110 (PROSITE_PROFILES); IPR003961 (PROSITE_PROFILES); IPR007110 (PROSITE_PROFILES); IPR007110 (PROSITE_PROFILES); IPR003961 (PROSITE_PROFILES); IPR007110 (PROSITE_PROFILES); IPR003961 (PROSITE_PROFILES); IPR007110 (PROSITE_PROFILES); IPR003961 (PROSITE_PROFILES); IPR007110 (PROSITE_PROFILES); IPR007110 (PROSITE_PROFILES); SSF48726 (SUPERFAMILY); IPR003961 (SUPERFAMILY); SSF48726 (SUPERFAMILY); SSF48726 (SUPERFAMILY); SSF48726 (SUPERFAMILY); SSF48726 (SUPERFAMILY); IPR003961 (SUPERFAMILY); IPR003961 (SUPERFAMILY); TMhelix (TMHMM) |
| 1718 | c39048_g1_i4_len_5130_path_209_0_1307_1<br>1116_1308_1309_1518_1310_1623_11139_1<br>624_1624_11140_1625_162_5 | 588 | neuroglian-like isoform 2 | 1710 | 0 | 77.50% | 0.148 | IPR003598 (SMART); IPR003599 (SMART); IPR003961 (SMART); IPR013783 (G3DSA:2.60.40.GENE3D); IPR013783 (G3DSA:2.60.40.GENE3D); IPR013783 (G3DSA:2.60.40.GENE3D); IPR013783 (G3DSA:2.60.40.GENE3D); IPR013098 (PFAM); IPR013783 (G3DSA:2.60.40.GENE3D); IPR013783 (G3DSA:2.60.40.GENE3D); IPR013783 (G3DSA:2.60.40.GENE3D); IPR013783 (G3DSA:2.60.40.GENE3D); PF13895 (PFAM); IPR013783 (G3DSA:2.60.40.GENE3D); IPR003961 (PFAM); IPR026966 (PFAM); PTHR10489:SF553 (PANTHER); PTHR10489 (PANTHER); TRANSMEMBRANE (PHOBIUS); NON_CYTOPLASMIC_DOMAIN (PHOBIUS); CYTOPLASMIC_DOMAIN (PHOBIUS); TRANSMEMBRANE (PHOBIUS); NON_CYTOPLASMIC_DOMAIN (PHOBIUS); IPR007110 (PROSITE_PROFILES); IPR003961 (PROSITE_PROFILES); IPR007110 (PROSITE_PROFILES); IPR003961 (PROSITE_PROFILES); IPR007110 (PROSITE_PROFILES); IPR003961 (PROSITE_PROFILES); IPR007110 (PROSITE_PROFILES); IPR003961 (PROSITE_PROFILES); IPR007110 (PROSITE_PROFILES); IPR007110 (PROSITE_PROFILES); SSF48726 (SUPERFAMILY); IPR003961 (SUPERFAMILY); IPR003961 (SUPERFAMILY); SSF48726 (SUPERFAMILY); SSF48726 (SUPERFAMILY); SSF48726 (SUPERFAMILY); SSF48726 (SUPERFAMILY); SSF48726 (SUPERFAMILY); IPR003961 (SUPERFAMILY); SSF48726 (SUPERFAMILY); TMhelix (TMHMM)    |
| 1719 | c39048_g1_i5_len_3584_path_51_0_77_1113<br>9_78_78_11140_79_79_25_80_3437_5190_3438_3583_5                    | 412 | neuroglian isoform x3     | 1194 | 0 | 78.00% | 0.148 | IPR003961 (SMART); IPR003599 (SMART); IPR003598 (SMART); IPR013783 (G3DSA:2.60.40.GENE3D); PF13895 (PFAM); IPR013783 (G3DSA:2.60.40.GENE3D); IPR013783 (G3DSA:2.60.40.GENE3D); IPR013783 (G3DSA:2.60.40.GENE3D); IPR013783 (G3DSA:2.60.40.GENE3D); IPR003961 (PFAM); IPR013783 (G3DSA:2.60.40.GENE3D); IPR013783 (G3DSA:2.60.40.GENE3D); IPR013098 (PFAM); IPR013783 (G3DSA:2.60.40.GENE3D); PTHR10489:SF553 (PANTHER); PTHR10489 (PANTHER); IPR003961 (PROSITE_PROFILES); IPR003961 (PROSITE_PROFILES); IPR007110 (PROSITE_PROFILES); IPR007110 (PROSITE_PROFILES); IPR007110 (PROSITE_PROFILES); IPR003961 (PROSITE_PROFILES); IPR003961 (PROSITE_PROFILES); IPR007110 (PROSITE_PROFILES); IPR003961 (PROSITE_PROFILES); IPR007110 (PROSITE_PROFILES); IPR003961 (SUPERFAMILY); SSF48726 (SUPERFAMILY); SSF48726 (SUPERFAMILY); SSF48726 (SUPERFAMILY); SSF48726 (SUPERFAMILY); SSF48726 (SUPERFAMILY); IPR003961 (SUPERFAMILY); IPR003961 (SUPERFAMILY); SSF48726 (SUPERFAMILY)                                                                                                                                                                                                                                                     |

|      |                                                                                                       |      |                                                          |      |           |        |        |                                                                                                                                                                                                                                                                                                                                                                                                                                                                                                                                                                                                                                                                                                                                                                                                                                                                                                                                                                                                                         |
|------|-------------------------------------------------------------------------------------------------------|------|----------------------------------------------------------|------|-----------|--------|--------|-------------------------------------------------------------------------------------------------------------------------------------------------------------------------------------------------------------------------------------------------------------------------------------------------------------------------------------------------------------------------------------------------------------------------------------------------------------------------------------------------------------------------------------------------------------------------------------------------------------------------------------------------------------------------------------------------------------------------------------------------------------------------------------------------------------------------------------------------------------------------------------------------------------------------------------------------------------------------------------------------------------------------|
| 1720 | c39048_g1_i6_len_4812_path_209_0_1307_25__1308_4665_5190_4666_4811_5                                  | 544  | neuroglian isoform x1                                    | 1604 | 0         | 77.80% | 0.148  | IPR003961 (SMART); IPR003599 (SMART); IPR003598 (SMART); IPR003961 (PFAM); IPR013783 (G3DSA:2.60.40.GENE3D); IPR013783 (G3DSA:2.60.40.GENE3D); IPR013783 (G3DSA:2.60.40.GENE3D); IPR013783 (G3DSA:2.60.40.GENE3D); IPR013783 (G3DSA:2.60.40.GENE3D); IPR013098 (PFAM); IPR013783 (G3DSA:2.60.40.GENE3D); IPR013783 (G3DSA:2.60.40.GENE3D); PF13895 (PFAM); PTHR10489 (PANTHER); PTHR10489:SF553 (PANTHER); NON_CYTOPLASMIC_DOMAIN (PHOBIUS); CYTOPLASMIC_DOMAIN (PHOBIUS); TRANSMEMBRANE (PHOBIUS); TRANSMEMBRANE (PHOBIUS); NON_CYTOPLASMIC_DOMAIN (PHOBIUS); IPR003961 (PROSITE_PROFILES); IPR007110 (PROSITE_PROFILES); IPR007110 (PROSITE_PROFILES); IPR007110 (PROSITE_PROFILES); IPR007110 (PROSITE_PROFILES); IPR003961 (PROSITE_PROFILES); IPR007110 (PROSITE_PROFILES); IPR007110 (PROSITE_PROFILES); IPR003961 (PROSITE_PROFILES); SSF48726 (SUPERFAMILY); IPR003961 (SUPERFAMILY); SSF48726 (SUPERFAMILY); IPR003961 (SUPERFAMILY); SSF48726 (SUPERFAMILY); IPR003961 (SUPERFAMILY); SSF48726 (SUPERFAMILY); |
| 1721 | c39061_g3_i1_len_619_path_60_0_20_2841_21_21_82_22_618_5                                              | 2507 | vp302_lycmc ame: full=venom protein 302 flags: precursor | 206  | 2.42E-14  | 56.20% | 0.779Y | PTHR14186:SF8 (PANTHER); IPR011390 (PANTHER); NON_CYTOPLASMIC_DOMAIN (PHOBIUS); SIGNAL_PEPTIDE_H_REGION (PHOBIUS); SIGNAL_PEPTIDE_C_REGION (PHOBIUS); SIGNAL_PEPTIDE_N_REGION (PHOBIUS); SIGNAL_PEPTIDE (PHOBIUS); IPR000867 (PROSITE_PROFILES); SignalP-noTM (SIGNALP_EUK); SignalP-noTM (SIGNALP_GRAM_NEGATIVE); SignalP-TM (SIGNALP_GRAM_POSITIVE); IPR009030 (SUPERFAMILY)                                                                                                                                                                                                                                                                                                                                                                                                                                                                                                                                                                                                                                          |
| 1722 | c39063_g2_i2_len_1070_path_1895_0_1044_6329_1045_1045_6330_1046_1046_6331_1047_1069_0                 | 525  | aminoacylase-1                                           | 357  | 6.94E-153 | 75.30% | 0.101  | IPR010159 (TIGRFAM); G3DSA:3.40.630.10 (GENE3D); IPR010159 (PIRSF); IPR011650 (G3DSA:3.30.70.GENE3D); IPR011650 (PFAM); IPR002933 (PFAM); PTHR11014 (PANTHER); PTHR11014:SF8 (PANTHER); IPR001261 (PROSITE_PATTERNS); IPR001261 (PROSITE_PATTERNS); SSF53187 (SUPERFAMILY); IPR011650 (SUPERFAMILY)                                                                                                                                                                                                                                                                                                                                                                                                                                                                                                                                                                                                                                                                                                                     |
| 1723 | c39063_g2_i3_len_1483_path_1895_0_1044_6329_1045_1045_6330_1046_1046_2938_1047_1482_0                 | 735  | aminoacylase-1                                           | 495  | 0         | 75.60% | 0.101  | IPR011650 (PFAM); G3DSA:3.40.630.10 (GENE3D); IPR010159 (TIGRFAM); IPR010159 (PIRSF); IPR002933 (PFAM); IPR011650 (G3DSA:3.30.70.GENE3D); PTHR11014 (PANTHER); PTHR11014:SF8 (PANTHER); IPR001261 (PROSITE_PATTERNS); IPR001261 (PROSITE_PATTERNS); TRANSMEMBRANE (PHOBIUS); NON_CYTOPLASMIC_DOMAIN (PHOBIUS); CYTOPLASMIC_DOMAIN (PHOBIUS); NON_CYTOPLASMIC_DOMAIN (PHOBIUS); TRANSMEMBRANE (PHOBIUS); SSF53187 (SUPERFAMILY); IPR011650 (SUPERFAMILY); TMhelix (TMHMM); TMhelix (TMHMM)                                                                                                                                                                                                                                                                                                                                                                                                                                                                                                                               |
| 1724 | c39076_g1_i1_len_744_path_1018_0_147_1166_148_157_1176_158_208_1227_209_253_1272_254_443_1462_444_4_1 | 84   | spindolin-related protein                                | 248  | 6.70E-40  | 56.60% | 0.103  | G3DSA:2.70.50.50 (GENE3D); IPR004302 (PFAM); IPR009030 (SUPERFAMILY); IPR014756 (SUPERFAMILY)                                                                                                                                                                                                                                                                                                                                                                                                                                                                                                                                                                                                                                                                                                                                                                                                                                                                                                                           |
| 1725 | c39079_g1_i1_len_1754_path_2229_0_902_3132_903_1594_4528_1595_1753_0                                  | 278  | 24-dehydrocholesterol reductase                          | 585  | 0         | 78.80% | 0.11   | IPR016169 (G3DSA:3.30.465.GENE3D); IPR006094 (PFAM); PTHR10801 (PANTHER); TRANSMEMBRANE (PHOBIUS); CYTOPLASMIC_DOMAIN (PHOBIUS); TRANSMEMBRANE (PHOBIUS); CYTOPLASMIC_DOMAIN (PHOBIUS); NON_CYTOPLASMIC_DOMAIN (PHOBIUS); IPR016166 (PROSITE_PROFILES); IPR016166 (SUPERFAMILY); TMhelix (TMHMM)                                                                                                                                                                                                                                                                                                                                                                                                                                                                                                                                                                                                                                                                                                                        |
| 1726 | c39079_g1_i2_len_2251_path_2229_0_902_3132_903_1594_3824_1595_2250_0                                  | 633  | delta -sterol reductase                                  | 751  | 0         | 78.60% | 0.11   | IPR006094 (PFAM); IPR016169 (G3DSA:3.30.465.GENE3D); PTHR10801 (PANTHER); TRANSMEMBRANE (PHOBIUS); TRANSMEMBRANE (PHOBIUS); TRANSMEMBRANE (PHOBIUS); CYTOPLASMIC_DOMAIN (PHOBIUS); NON_CYTOPLASMIC_DOMAIN (PHOBIUS); TRANSMEMBRANE (PHOBIUS); CYTOPLASMIC_DOMAIN (PHOBIUS); TRANSMEMBRANE (PHOBIUS); NON_CYTOPLASMIC_DOMAIN (PHOBIUS); CYTOPLASMIC_DOMAIN (PHOBIUS); IPR016166 (PROSITE_PROFILES); IPR016166 (SUPERFAMILY); IPR016164 (SUPERFAMILY); TMhelix (TMHMM)                                                                                                                                                                                                                                                                                                                                                                                                                                                                                                                                                    |
| 1727 | c39087_g1_i1_len_1009_path_327_0_118_445_119_127_292_128_176_2455_177_1008_0                          | 3208 | trypsinogen h2_1g                                        | 337  | 1.85E-58  | 57.10% | 0.420Y | IPR001314 (PRINTS); IPR001254 (SMART); IPR001254 (PFAM); G3DSA:2.40.10.10 (GENE3D); G3DSA:2.40.10.10 (GENE3D); PTHR24265 (PANTHER); NON_CYTOPLASMIC_DOMAIN (PHOBIUS); CYTOPLASMIC_DOMAIN (PHOBIUS); TRANSMEMBRANE (PHOBIUS); IPR001254 (PROSITE_PROFILES); IPR009003 (SUPERFAMILY); TMhelix (TMHMM)                                                                                                                                                                                                                                                                                                                                                                                                                                                                                                                                                                                                                                                                                                                     |



|      |                                                                                                    |       |                                   |      |           |        |         |                                                                                                                                                                                                                                                                                                                                                                                                                                                                                                                                                                                                                                                                                                                                          |
|------|----------------------------------------------------------------------------------------------------|-------|-----------------------------------|------|-----------|--------|---------|------------------------------------------------------------------------------------------------------------------------------------------------------------------------------------------------------------------------------------------------------------------------------------------------------------------------------------------------------------------------------------------------------------------------------------------------------------------------------------------------------------------------------------------------------------------------------------------------------------------------------------------------------------------------------------------------------------------------------------------|
| 1728 | c39099_g1_i1_len_1196_path_1424_0_1195_4                                                           | 118   | membrane glycoprotein lig-        | 399  | 1.34E-21  | 44.00% | 0.327   | G3DSA:3.80.10.10 (GENE3D); PTHR24367 (PANTHER); PTHR24367:SF251 (PANTHER); SIGNAL_PEPTIDE_C_REGION (PHOBIUS); SIGNAL_PEPTIDE_H_REGION (PHOBIUS); SIGNAL_PEPTIDE_N_REGION (PHOBIUS); NON_CYTOPLASMIC_DOMAIN (PHOBIUS); SIGNAL_PEPTIDE (PHOBIUS); IPR001611 (PROSITE_PROFILES); IPR001611 (PROSITE_PROFILES); SSF52058 (SUPERFAMILY)                                                                                                                                                                                                                                                                                                                                                                                                       |
| 1765 | c391_g1_i1_len_3638_path_3666_0_3637_0                                                             | 637   | transducin beta-like protein 2    | 1213 | 9.15E-143 | 69.20% | 0.15    | Coil (COILS); IPR001680 (SMART); IPR015943 (G3DSA:2.130.10.GENE3D); IPR001680 (PFAM); PTHR22847:SF380 (PANTHER); PTHR22847 (PANTHER); IPR019775 (PROSITE_PATTERNS); CYTOPLASMIC_DOMAIN (PHOBIUS); TRANSMEMBRANE (PHOBIUS); TRANSMEMBRANE (PHOBIUS); TRANSMEMBRANE (PHOBIUS); TRANSMEMBRANE (PHOBIUS); NON_CYTOPLASMIC_DOMAIN (PHOBIUS); TRANSMEMBRANE (PHOBIUS); NON_CYTOPLASMIC_DOMAIN (PHOBIUS); TRANSMEMBRANE (PHOBIUS); CYTOPLASMIC_DOMAIN (PHOBIUS); TRANSMEMBRANE (PHOBIUS); CYTOPLASMIC_DOMAIN (PHOBIUS); IPR017986 (PROSITE_PROFILES); IPR001680 (PROSITE_PROFILES); IPR001680 (PROSITE_PROFILES); IPR017986 (SUPERFAMILY); TMhelix (TMHMM); TMhelix (TMHMM); TMhelix (TMHMM); TMhelix (TMHMM); TMhelix (TMHMM); TMhelix (TMHMM) |
| 1729 | c39100_g1_i1_len_1783_path_75_0_1113_1188_1114_1125_74_1126_1782_5                                 | 13718 | dermatopontin 2                   | 594  | 9.11E-38  | 59.10% | 0.161   | PF14704 (PFAM); IPR026645 (PANTHER); SIGNAL_PEPTIDE_H_REGION (PHOBIUS); NON_CYTOPLASMIC_DOMAIN (PHOBIUS); SIGNAL_PEPTIDE_N_REGION (PHOBIUS); SIGNAL_PEPTIDE_C_REGION (PHOBIUS); SIGNAL_PEPTIDE (PHOBIUS); TMhelix (TMHMM)                                                                                                                                                                                                                                                                                                                                                                                                                                                                                                                |
| 1730 | c39105_g1_i1_len_2913_path_9784_0_93_9877_94_2763_6516_2764_2912_5                                 | 670   | cd109 antigen-like isoform x2     | 971  | 0         | 75.40% | 0.103   | IPR009048 (G3DSA:2.60.40.GENE3D); IPR001599 (PFAM); IPR011626 (PFAM); IPR008930 (G3DSA:1.50.10.GENE3D); IPR009048 (PFAM); IPR019565 (PFAM); PTHR11412 (PANTHER); PTHR11412:SF84 (PANTHER); IPR019742 (PROSITE_PATTERNS); NON_CYTOPLASMIC_DOMAIN (PHOBIUS); TRANSMEMBRANE (PHOBIUS); CYTOPLASMIC_DOMAIN (PHOBIUS); TRANSMEMBRANE (PHOBIUS); NON_CYTOPLASMIC_DOMAIN (PHOBIUS); IPR009048 (SUPERFAMILY); IPR008930 (SUPERFAMILY); IPR014756 (SUPERFAMILY); TMhelix (TMHMM); TMhelix (TMHMM)                                                                                                                                                                                                                                                 |
| 1731 | c39105_g2_i1_len_2609_path_6089_0_211_2921_212_2189_4899_2190_2285_4995_2286_2286_4996_2287_2359_5 | 194   | cd109 antigen-like isoform x2     | 869  | 0         | 70.20% | 0.732Y  | IPR002890 (PFAM); IPR011625 (PFAM); PTHR11412 (PANTHER); PTHR11412:SF84 (PANTHER); TRANSMEMBRANE (PHOBIUS); SIGNAL_PEPTIDE_C_REGION (PHOBIUS); SIGNAL_PEPTIDE_N_REGION (PHOBIUS); TRANSMEMBRANE (PHOBIUS); SIGNAL_PEPTIDE (PHOBIUS); CYTOPLASMIC_DOMAIN (PHOBIUS); NON_CYTOPLASMIC_DOMAIN (PHOBIUS); NON_CYTOPLASMIC_DOMAIN (PHOBIUS); SIGNAL_PEPTIDE_H_REGION (PHOBIUS); SignalP-noTM (SIGNALP_EUK); TMhelix (TMHMM); TMhelix (TMHMM)                                                                                                                                                                                                                                                                                                   |
| 1732 | c39105_g2_i2_len_2439_path_6089_0_211_2921_212_2189_5069_2190_2282_5162_2283_2438_3                | 185   | cd109 antigen-like isoform x2     | 813  | 0         | 70.20% | 0.463 Y | IPR011625 (PFAM); IPR002890 (PFAM); PTHR11412 (PANTHER); PTHR11412:SF84 (PANTHER); SignalP-noTM (SIGNALP_EUK)                                                                                                                                                                                                                                                                                                                                                                                                                                                                                                                                                                                                                            |
| 1733 | c39105_g2_i3_len_2442_path_6089_0_211_2921_212_2189_4899_2190_2285_5162_2286_2441_3                | 187   | cd109 antigen-like isoform x2     | 814  | 0         | 70.10% | 0.452 Y | IPR002890 (PFAM); IPR011625 (PFAM); PTHR11412 (PANTHER); PTHR11412:SF84 (PANTHER); TRANSMEMBRANE (PHOBIUS); CYTOPLASMIC_DOMAIN (PHOBIUS); NON_CYTOPLASMIC_DOMAIN (PHOBIUS); SignalP-noTM (SIGNALP_EUK); TMhelix (TMHMM)                                                                                                                                                                                                                                                                                                                                                                                                                                                                                                                  |
| 1734 | c39105_g2_i5_len_2263_path_6089_0_211_2921_212_2189_4996_2190_2262_4                               | 172   | cd109 antigen-like isoform x2     | 754  | 0         | 70.10% | 0.278   | IPR002890 (PFAM); IPR011625 (PFAM); PTHR11412:SF84 (PANTHER); PTHR11412 (PANTHER)                                                                                                                                                                                                                                                                                                                                                                                                                                                                                                                                                                                                                                                        |
| 1735 | c39106_g1_i1_len_3094_path_53_0_3093_0                                                             | 545   | neutral alpha-glucosidase ab-like | 1032 | 0         | 71.60% | 0.179   | IPR025887 (PFAM); IPR000322 (PFAM); PTHR22762:SF54 (PANTHER); PTHR22762 (PANTHER); SSF51011 (SUPERFAMILY); IPR017853 (SUPERFAMILY); IPR011013 (SUPERFAMILY)                                                                                                                                                                                                                                                                                                                                                                                                                                                                                                                                                                              |

|      |                                                                                                         |     |                                                           |      |           |        |         |                                                                                                                                                                                                                                                                                                                                                                                                                                                                                                                                                            |
|------|---------------------------------------------------------------------------------------------------------|-----|-----------------------------------------------------------|------|-----------|--------|---------|------------------------------------------------------------------------------------------------------------------------------------------------------------------------------------------------------------------------------------------------------------------------------------------------------------------------------------------------------------------------------------------------------------------------------------------------------------------------------------------------------------------------------------------------------------|
| 1736 | c39109_g1_i1_len_1977_path_2022_0_1598_3621_1599_1742_3765_1743_1934_4096_1935_1976_3                   | 560 | prostaglandin g h synthase 2-like isoform x3              | 659  | 0         | 70.20% | 0.689 Y | IPR019791 (PRINTS); IPR019791 (G3DSA:1.10.640.GENE3D); G3DSA:2.10.25.10 (GENE3D); IPR019791 (PFAM); PTHR11903 (PANTHER); PTHR11903:SF10 (PANTHER); SIGNAL_PEPTIDE (PHOBIUS); SIGNAL_PEPTIDE_C_REGION (PHOBIUS); SIGNAL_PEPTIDE_N_REGION (PHOBIUS); NON_CYTOPLASMIC_DOMAIN (PHOBIUS); SIGNAL_PEPTIDE_H_REGION (PHOBIUS); IPR000742 (PROSITE_PROFILES); IPR019791 (PROSITE_PROFILES); SignalP-noTM (SIGNALP_GRAM_NEGATIVE); SignalP-noTM (SIGNALP_EUK); SignalP-TM (SIGNALP_GRAM_POSITIVE); SSF57196 (SUPERFAMILY); IPR010255 (SUPERFAMILY); TMhelix (TMHMM) |
| 1737 | c39109_g1_i2_len_1833_path_2022_0_1598_3765_1599_1790_4096_1791_1832_3                                  | 478 | prostaglandin g h synthase 2-like isoform x3              | 611  | 0         | 65.30% | 0.689 Y | IPR019791 (PRINTS); IPR019791 (PFAM); IPR019791 (G3DSA:1.10.640.GENE3D); G3DSA:2.10.25.10 (GENE3D); PTHR11903 (PANTHER); PTHR11903:SF10 (PANTHER); SIGNAL_PEPTIDE (PHOBIUS); NON_CYTOPLASMIC_DOMAIN (PHOBIUS); SIGNAL_PEPTIDE_C_REGION (PHOBIUS); SIGNAL_PEPTIDE_N_REGION (PHOBIUS); SIGNAL_PEPTIDE_H_REGION (PHOBIUS); IPR000742 (PROSITE_PROFILES); IPR019791 (PROSITE_PROFILES); SignalP-noTM (SIGNALP_EUK); SignalP-noTM (SIGNALP_GRAM_NEGATIVE); SignalP-TM (SIGNALP_GRAM_POSITIVE); IPR010255 (SUPERFAMILY); SSF57196 (SUPERFAMILY); TMhelix (TMHMM) |
| 1738 | c39109_g1_i3_len_1888_path_2022_0_1598_3765_1599_1790_3957_1791_1887_4                                  | 504 | prostaglandin g h synthase 2-like isoform x3              | 629  | 0         | 65.30% | 0.369 Y | IPR019791 (PRINTS); G3DSA:2.10.25.10 (GENE3D); IPR019791 (PFAM); IPR019791 (G3DSA:1.10.640.GENE3D); PTHR11903:SF10 (PANTHER); PTHR11903 (PANTHER); NON_CYTOPLASMIC_DOMAIN (PHOBIUS); TRANSMEMBRANE (PHOBIUS); CYTOPLASMIC_DOMAIN (PHOBIUS); IPR000742 (PROSITE_PROFILES); IPR019791 (PROSITE_PROFILES); SignalP-TM (SIGNALP_GRAM_POSITIVE); SSF57196 (SUPERFAMILY); IPR010255 (SUPERFAMILY); TMhelix (TMHMM)                                                                                                                                               |
| 1739 | c39109_g1_i4_len_2032_path_2022_0_1598_3621_1599_1742_3765_1743_1934_3957_1935_2031_4                   | 588 | prostaglandin g h synthase 2-like isoform x3              | 677  | 0         | 70.20% | 0.369 Y | IPR019791 (PRINTS); IPR019791 (PFAM); IPR019791 (G3DSA:1.10.640.GENE3D); G3DSA:2.10.25.10 (GENE3D); PTHR11903 (PANTHER); PTHR11903:SF10 (PANTHER); NON_CYTOPLASMIC_DOMAIN (PHOBIUS); TRANSMEMBRANE (PHOBIUS); CYTOPLASMIC_DOMAIN (PHOBIUS); IPR000742 (PROSITE_PROFILES); IPR019791 (PROSITE_PROFILES); SignalP-TM (SIGNALP_GRAM_POSITIVE); SSF57196 (SUPERFAMILY); IPR010255 (SUPERFAMILY); TMhelix (TMHMM)                                                                                                                                               |
| 1740 | c39112_g1_i1_len_3458_path_1_0_303_7038_304_323_325_324_3457_3                                          | 306 | complement c1s subcomponent                               | 1153 | 4.16E-10  | 43.40% | 0.106   | IPR000859 (SMART); IPR000859 (G3DSA:2.60.120.GENE3D); IPR000859 (PFAM); NON_CYTOPLASMIC_DOMAIN (PHOBIUS); TRANSMEMBRANE (PHOBIUS); CYTOPLASMIC_DOMAIN (PHOBIUS); IPR000859 (PROSITE_PROFILES); IPR000859 (SUPERFAMILY); IPR000859 (SUPERFAMILY); TMhelix (TMHMM); TMhelix (TMHMM)                                                                                                                                                                                                                                                                          |
| 1741 | c39113_g1_i1_len_2099_path_3166_0_445_3_612_446_764_3931_765_765_3932_766_113_7_4304_1138_1314_4481_1_0 | 562 | peptidyl-prolyl cis-trans isomerase cyp11 isoform x1      | 700  | 1.38E-147 | 72.40% | 0.133   | Coil (COILS); Coil (COILS); IPR002130 (PRINTS); IPR002130 (PFAM); IPR029000 (G3DSA:2.40.100.GENE3D); PTHR11071:SF229 (PANTHER); IPR024936 (PANTHER); IPR020892 (PROSITE_PATTERNS); IPR002130 (PROSITE_PROFILES); IPR029000 (SUPERFAMILY)                                                                                                                                                                                                                                                                                                                   |
| 1742 | c39113_g1_i2_len_1687_path_3166_0_445_3_612_446_764_3931_765_765_3932_766_113_7_4304_1138_1314_3932_1_0 | 565 | peptidyl-prolyl cis-trans isomerase cyp11 isoform x1      | 563  | 4.51E-146 | 72.10% | 0.133   | Coil (COILS); IPR002130 (PRINTS); IPR002130 (PFAM); IPR029000 (G3DSA:2.40.100.GENE3D); PTHR11071:SF229 (PANTHER); IPR024936 (PANTHER); IPR020892 (PROSITE_PATTERNS); IPR002130 (PROSITE_PROFILES); IPR029000 (SUPERFAMILY)                                                                                                                                                                                                                                                                                                                                 |
| 1743 | c39113_g1_i3_len_2215_path_3166_0_445_6_396_446_561_3612_562_880_3931_881_881_3932_882_1253_4304_125_0  | 525 | peptidyl-prolyl cis-trans isomerase cyp11-like isoform x2 | 739  | 2.00E-68  | 88.60% | 0.133   | Coil (COILS); Coil (COILS); Coil (COILS); IPR002130 (PRINTS); IPR002130 (PFAM); IPR029000 (G3DSA:2.40.100.GENE3D); PTHR11071:SF229 (PANTHER); IPR024936 (PANTHER); IPR020892 (PROSITE_PATTERNS); NON_CYTOPLASMIC_DOMAIN (PHOBIUS); TRANSMEMBRANE (PHOBIUS); TRANSMEMBRANE (PHOBIUS); NON_CYTOPLASMIC_DOMAIN (PHOBIUS); CYTOPLASMIC_DOMAIN (PHOBIUS); TRANSMEMBRANE (PHOBIUS); CYTOPLASMIC_DOMAIN (PHOBIUS); IPR002130 (PROSITE_PROFILES); IPR029000 (SUPERFAMILY)                                                                                          |
| 1744 | c39113_g1_i3_len_2215_path_3166_0_445_6_396_446_561_3612_562_880_3931_881_881_3932_882_1253_4304_125_2  | 525 | peptidyl-prolyl cis-trans isomerase g isoform x3          | 738  | 2.19E-61  | 62.40% | 0.135   | Coil (COILS); Coil (COILS); IPR002130 (PFAM); IPR029000 (G3DSA:2.40.100.GENE3D); PTHR11071:SF229 (PANTHER); IPR024936 (PANTHER); IPR002130 (PROSITE_PROFILES); IPR029000 (SUPERFAMILY)                                                                                                                                                                                                                                                                                                                                                                     |

|      |                                                                                                        |      |                                                         |      |           |         |       |                                                                                                                                                                                                                                                                                                                                                                                                                                                                                                |
|------|--------------------------------------------------------------------------------------------------------|------|---------------------------------------------------------|------|-----------|---------|-------|------------------------------------------------------------------------------------------------------------------------------------------------------------------------------------------------------------------------------------------------------------------------------------------------------------------------------------------------------------------------------------------------------------------------------------------------------------------------------------------------|
| 1745 | c39128_g1_i1_len_2799_path_213_0_417_63_0_418_420_212_421_1789_1998_1790_1816_104_1817_2401_2609_4     | 5379 | meprin a                                                | 933  | 2.22E-78  | 52.00%  | 0.17  | IPR001506 (PRINTS); IPR000859 (SMART); IPR006026 (SMART); IPR001506 (PFAM); IPR000859 (G3DSA:2.60.120.GENE3D); IPR000859 (G3DSA:2.60.120.GENE3D); IPR024079 (G3DSA:3.40.390.GENE3D); IPR000859 (PFAM); PTHR10127:SF580 (PANTHER); PTHR10127 (PANTHER); TRANSMEMBRANE (PHOBIUS); CYTOPLASMIC_DOMAIN (PHOBIUS); NON_CYTOPLASMIC_DOMAIN (PHOBIUS); IPR000859 (PROSITE_PROFILES); SSF55486 (SUPERFAMILY); IPR000859 (SUPERFAMILY); IPR000859 (SUPERFAMILY)                                         |
| 1746 | c39131_g1_i1_len_805_path_1_0_41_43_42_396_1892_397_409_411_410_653_655_654_657_659_658_663_2_1        | 64   | galectin partial                                        | 268  | 2.21E-59  | 69.30%  | 0.108 | IPR001079 (SMART); IPR001079 (SMART); IPR013320 (G3DSA:2.60.120.GENE3D); IPR001079 (PFAM); PTHR11346 (PANTHER); IPR001079 (PROSITE_PROFILES); IPR013320 (SUPERFAMILY)                                                                                                                                                                                                                                                                                                                          |
| 1747 | c39145_g1_i1_len_251_path_2723_0_22_274_8_23_121_295_122_154_328_155_227_175_228_250_4                 | 669  | ubiquitin family protein                                | 84   | 3.07E-51  | 100.00% | 0.201 | IPR019956 (PRINTS); IPR000626 (SMART); G3DSA:3.10.20.90 (GENE3D); IPR000626 (PFAM); PTHR10666 (PANTHER); IPR019954 (PROSITE_PATTERNS); IPR000626 (PROSITE_PROFILES); IPR029071 (SUPERFAMILY)                                                                                                                                                                                                                                                                                                   |
| 1748 | c39145_g1_i2_len_894_path_779_0_785_767_786_797_328_798_870_175_871_893_4                              | 348  | polyubiquitin-c-like isoform 2                          | 298  | 1.34E-110 | 98.90%  | 0.201 | IPR019956 (PRINTS); IPR000626 (SMART); G3DSA:3.10.20.90 (GENE3D); IPR000626 (PFAM); PTHR10666 (PANTHER); IPR019954 (PROSITE_PATTERNS); IPR019954 (PROSITE_PATTERNS); TRANSMEMBRANE (PHOBIUS); CYTOPLASMIC_DOMAIN (PHOBIUS); NON_CYTOPLASMIC_DOMAIN (PHOBIUS); IPR000626 (PROSITE_PROFILES); IPR000626 (PROSITE_PROFILES); IPR029071 (SUPERFAMILY); IPR029071 (SUPERFAMILY)                                                                                                                     |
| 1749 | c39153_g1_i1_len_1241_path_7174_0_1083_264_1084_1108_157_1109_1215_264_1216_1240_5                     | 343  | bile salt-activated lipase isoform x4                   | 413  | 5.16E-11  | 40.50%  | 0.104 | no IPS match                                                                                                                                                                                                                                                                                                                                                                                                                                                                                   |
| 1750 | c39153_g2_i1_len_4395_path_264_0_24_828_1_25_3284_384_3285_3395_11650_3396_43_22_1121_4323_4349_1112_4 | 1149 | bile salt-activated lipase isoform x1                   | 1465 | 6.99E-19  | 45.17%  | 0.119 | TRANSMEMBRANE (PHOBIUS); TRANSMEMBRANE (PHOBIUS); NON_CYTOPLASMIC_DOMAIN (PHOBIUS); CYTOPLASMIC_DOMAIN (PHOBIUS); NON_CYTOPLASMIC_DOMAIN (PHOBIUS); TMhelix (TMHMM)                                                                                                                                                                                                                                                                                                                            |
| 1751 | c39170_g2_i1_len_2337_path_4217_0_659_3_6_660_1220_7059_1221_1222_3108_1223_1404_62_1405_1405_328_4    | 6350 | nuclease-sensitive element-binding protein 1 isoform x4 | 779  | 7.49E-57  | 77.00%  | 0.102 | IPR002059 (PRINTS); IPR011129 (SMART); IPR002059 (PFAM); IPR012340 (G3DSA:2.40.50.GENE3D); PTHR11544 (PANTHER); IPR019844 (PROSITE_PATTERNS); TRANSMEMBRANE (PHOBIUS); TRANSMEMBRANE (PHOBIUS); NON_CYTOPLASMIC_DOMAIN (PHOBIUS); TRANSMEMBRANE (PHOBIUS); NON_CYTOPLASMIC_DOMAIN (PHOBIUS); CYTOPLASMIC_DOMAIN (PHOBIUS); CYTOPLASMIC_DOMAIN (PHOBIUS); IPR012340 (SUPERFAMILY); TMhelix (TMHMM)                                                                                              |
| 1752 | c39170_g2_i2_len_2493_path_4217_0_659_3_6_660_1220_7059_1221_1222_6803_1223_1227_2957_1228_1251_2_4    | 6335 | nuclease-sensitive element-binding protein 1 isoform x4 | 831  | 6.54E-57  | 77.00%  | 0.102 | IPR002059 (PRINTS); IPR011129 (SMART); IPR002059 (PFAM); IPR012340 (G3DSA:2.40.50.GENE3D); PTHR11544 (PANTHER); IPR019844 (PROSITE_PATTERNS); CYTOPLASMIC_DOMAIN (PHOBIUS); TRANSMEMBRANE (PHOBIUS); NON_CYTOPLASMIC_DOMAIN (PHOBIUS); CYTOPLASMIC_DOMAIN (PHOBIUS); TRANSMEMBRANE (PHOBIUS); TRANSMEMBRANE (PHOBIUS); IPR012340 (SUPERFAMILY); TMhelix (TMHMM)                                                                                                                                |
| 1753 | c39170_g2_i3_len_2376_path_4217_0_659_3_6_660_1220_3067_1221_1261_3108_1262_1443_62_1444_1444_328_4    | 7081 | nuclease-sensitive element-binding protein 1 isoform x4 | 792  | 9.60E-57  | 75.40%  | 0.102 | IPR002059 (PRINTS); IPR011129 (SMART); IPR002059 (PFAM); IPR012340 (G3DSA:2.40.50.GENE3D); PTHR11544 (PANTHER); IPR019844 (PROSITE_PATTERNS); TRANSMEMBRANE (PHOBIUS); NON_CYTOPLASMIC_DOMAIN (PHOBIUS); CYTOPLASMIC_DOMAIN (PHOBIUS); TRANSMEMBRANE (PHOBIUS); CYTOPLASMIC_DOMAIN (PHOBIUS); TRANSMEMBRANE (PHOBIUS); NON_CYTOPLASMIC_DOMAIN (PHOBIUS); IPR012340 (SUPERFAMILY); TMhelix (TMHMM)                                                                                              |
| 1754 | c39170_g2_i4_len_1979_path_2243_0_713_2_957_714_737_2981_738_823_3067_824_864_3108_865_1046_62_1047_4  | 3648 | nuclease-sensitive element-binding protein 1 isoform x4 | 660  | 3.52E-57  | 75.40%  | 0.102 | IPR002059 (PRINTS); IPR011129 (SMART); IPR012340 (G3DSA:2.40.50.GENE3D); IPR002059 (PFAM); PTHR11544 (PANTHER); IPR019844 (PROSITE_PATTERNS); TRANSMEMBRANE (PHOBIUS); NON_CYTOPLASMIC_DOMAIN (PHOBIUS); NON_CYTOPLASMIC_DOMAIN (PHOBIUS); CYTOPLASMIC_DOMAIN (PHOBIUS); CYTOPLASMIC_DOMAIN (PHOBIUS); TRANSMEMBRANE (PHOBIUS); NON_CYTOPLASMIC_DOMAIN (PHOBIUS); TRANSMEMBRANE (PHOBIUS); TRANSMEMBRANE (PHOBIUS); IPR012340 (SUPERFAMILY); TMhelix (TMHMM); TMhelix (TMHMM); TMhelix (TMHMM) |

|      |                                                                                                           |      |                                                                       |     |          |        |       |                                                                                                                                                                                                                                                                                                                                                                                                             |
|------|-----------------------------------------------------------------------------------------------------------|------|-----------------------------------------------------------------------|-----|----------|--------|-------|-------------------------------------------------------------------------------------------------------------------------------------------------------------------------------------------------------------------------------------------------------------------------------------------------------------------------------------------------------------------------------------------------------------|
| 1755 | c39170_g2_i5_len_2394_path_4217_0_659_3<br>6_660_1220_3067_1221_1261_3108_1262_1443_44_1444_1461_62_4     | 6437 | nuclease-sensitive element-binding protein 1 isoform x4               | 798 | 8.84E-57 | 75.40% | 0.102 | IPR002059 (PRINTS); IPR011129 (SMART); IPR002059 (PFAM); IPR012340 (G3DSA:2.40.50.GENE3D); PTHR11544 (PANTHER); IPR019844 (PROSITE_PATTERNS); CYTOPLASMIC_DOMAIN (PHOBIUS); NON_CYTOPLASMIC_DOMAIN (PHOBIUS); CYTOPLASMIC_DOMAIN (PHOBIUS); TRANSMEMBRANE (PHOBIUS); NON_CYTOPLASMIC_DOMAIN (PHOBIUS); TRANSMEMBRANE (PHOBIUS); TRANSMEMBRANE (PHOBIUS); IPR012340 (SUPERFAMILY); TMhelix (TMHMM)           |
| 1756 | c39170_g2_i6_len_2394_path_4217_0_659_3<br>6_660_1220_3067_1221_1261_3108_1262_1443_62_1444_1444_328_4    | 6431 | nuclease-sensitive element-binding protein 1 isoform x4               | 798 | 9.01E-57 | 75.40% | 0.102 | IPR002059 (PRINTS); IPR011129 (SMART); IPR012340 (G3DSA:2.40.50.GENE3D); IPR002059 (PFAM); PTHR11544 (PANTHER); IPR019844 (PROSITE_PATTERNS); TRANSMEMBRANE (PHOBIUS); TRANSMEMBRANE (PHOBIUS); NON_CYTOPLASMIC_DOMAIN (PHOBIUS); TRANSMEMBRANE (PHOBIUS); CYTOPLASMIC_DOMAIN (PHOBIUS); CYTOPLASMIC_DOMAIN (PHOBIUS); NON_CYTOPLASMIC_DOMAIN (PHOBIUS); IPR012340 (SUPERFAMILY); TMhelix (TMHMM)           |
| 1757 | c39170_g2_i7_len_2412_path_4217_0_659_3<br>6_660_1220_3067_1221_1261_3108_1262_1443_44_1444_1461_62_4     | 6437 | nuclease-sensitive element-binding protein 1 isoform x3               | 804 | 9.69E-57 | 75.40% | 0.102 | IPR002059 (PRINTS); IPR011129 (SMART); IPR012340 (G3DSA:2.40.50.GENE3D); IPR002059 (PFAM); PTHR11544 (PANTHER); IPR019844 (PROSITE_PATTERNS); NON_CYTOPLASMIC_DOMAIN (PHOBIUS); TRANSMEMBRANE (PHOBIUS); CYTOPLASMIC_DOMAIN (PHOBIUS); CYTOPLASMIC_DOMAIN (PHOBIUS); TRANSMEMBRANE (PHOBIUS); NON_CYTOPLASMIC_DOMAIN (PHOBIUS); TRANSMEMBRANE (PHOBIUS); IPR012340 (SUPERFAMILY); TMhelix (TMHMM)           |
| 1758 | c39170_g2_i8_len_2355_path_4217_0_659_3<br>6_660_1220_7059_1221_1222_3108_1223_1404_44_1405_1422_62_4     | 5798 | nuclease-sensitive element-binding protein 1 isoform x4               | 785 | 7.52E-57 | 77.00% | 0.102 | IPR002059 (PRINTS); IPR011129 (SMART); IPR012340 (G3DSA:2.40.50.GENE3D); IPR002059 (PFAM); PTHR11544 (PANTHER); IPR019844 (PROSITE_PATTERNS); TRANSMEMBRANE (PHOBIUS); CYTOPLASMIC_DOMAIN (PHOBIUS); TRANSMEMBRANE (PHOBIUS); CYTOPLASMIC_DOMAIN (PHOBIUS); NON_CYTOPLASMIC_DOMAIN (PHOBIUS); TRANSMEMBRANE (PHOBIUS); NON_CYTOPLASMIC_DOMAIN (PHOBIUS); IPR012340 (SUPERFAMILY); TMhelix (TMHMM)           |
| 1759 | c39184_g1_i1_len_1346_path_1220_0_522_1<br>743_523_527_1748_528_726_252_727_746_272_747_756_252_757_776_1 | 582  | extensin-1-like isoform x1                                            | 449 | 2.65E-08 | 50.00% | 0.121 | no IPS match                                                                                                                                                                                                                                                                                                                                                                                                |
| 1760 | c39184_g1_i2_len_1399_path_1220_0_522_1<br>743_523_527_1748_528_726_252_727_746_272_747_756_252_757_776_1 | 759  | extensin-1-like isoform x1                                            | 466 | 3.32E-08 | 49.30% | 0.121 | no IPS match                                                                                                                                                                                                                                                                                                                                                                                                |
| 1761 | c39190_g1_i1_len_2165_path_4078_0_408_1<br>519_409_485_1574_486_2140_1502_2141_2164_3                     | 1337 | serine threonine-protein phosphatase alpha-2 isoform                  | 722 | 0        | 98.00% | 0.099 | IPR006186 (PRINTS); IPR006186 (SMART); IPR004843 (PFAM); IPR029052 (G3DSA:3.60.21.GENE3D); PTHR11668 (PANTHER); PTHR11668:SF213 (PANTHER); IPR006186 (PROSITE_PATTERNS); NON_CYTOPLASMIC_DOMAIN (PHOBIUS); CYTOPLASMIC_DOMAIN (PHOBIUS); NON_CYTOPLASMIC_DOMAIN (PHOBIUS); TRANSMEMBRANE (PHOBIUS); CYTOPLASMIC_DOMAIN (PHOBIUS); TRANSMEMBRANE (PHOBIUS); TRANSMEMBRANE (PHOBIUS); IPR029052 (SUPERFAMILY) |
| 1762 | c39190_g1_i2_len_2483_path_4078_0_408_1<br>519_409_485_1574_486_2140_6214_2141_2482_3                     | 1492 | serine threonine-protein phosphatase alpha-2 isoform                  | 828 | 0        | 97.30% | 0.116 | IPR006186 (PRINTS); IPR006186 (SMART); IPR029052 (G3DSA:3.60.21.GENE3D); IPR004843 (PFAM); PTHR11668:SF213 (PANTHER); PTHR11668 (PANTHER); IPR006186 (PROSITE_PATTERNS); NON_CYTOPLASMIC_DOMAIN (PHOBIUS); CYTOPLASMIC_DOMAIN (PHOBIUS); TRANSMEMBRANE (PHOBIUS); TRANSMEMBRANE (PHOBIUS); TRANSMEMBRANE (PHOBIUS); CYTOPLASMIC_DOMAIN (PHOBIUS); IPR029052 (SUPERFAMILY)                                   |
| 1763 | c39196_g1_i1_len_2316_path_697_0_116_49<br>3_117_319_696_320_841_1333_842_925_2_46_926_2315_1             | 1177 | alpha-n-acetylgalactosaminidase isoform x4                            | 772 | 0        | 85.80% | 0.107 | Coil (COILS); IPR002241 (PRINTS); IPR013785 (G3DSA:3.20.20.GENE3D); IPR000111 (PFAM); IPR013780 (G3DSA:2.60.40.GENE3D); PTHR11452:SF23 (PANTHER); PTHR11452 (PANTHER); IPR000111 (PROSITE_PATTERNS); CYTOPLASMIC_DOMAIN (PHOBIUS); NON_CYTOPLASMIC_DOMAIN (PHOBIUS); TRANSMEMBRANE (PHOBIUS); SSF51011 (SUPERFAMILY); IPR017853 (SUPERFAMILY); TMhelix (TMHMM)                                              |
| 1764 | c39196_g1_i2_len_2113_path_697_0_116_69<br>6_117_638_1333_639_722_246_723_2112_2                          | 1169 | alpha-n-acetylgalactosaminidase isoform x4                            | 704 | 0        | 85.80% | 0.143 | IPR002241 (PRINTS); IPR013780 (G3DSA:2.60.40.GENE3D); IPR013785 (G3DSA:3.20.20.GENE3D); IPR000111 (PFAM); PTHR11452 (PANTHER); PTHR11452:SF23 (PANTHER); IPR000111 (PROSITE_PATTERNS); TRANSMEMBRANE (PHOBIUS); NON_CYTOPLASMIC_DOMAIN (PHOBIUS); CYTOPLASMIC_DOMAIN (PHOBIUS); IPR017853 (SUPERFAMILY); SSF51011 (SUPERFAMILY); TMhelix (TMHMM)                                                            |
| 1766 | c39205_g2_i1_len_1002_path_1140_0_1001_1                                                                  | 149  | mam and ldl-receptor class a domain-containing protein c10orf112-like | 334 | 3.88E-08 | 51.50% | 0.138 | IPR000998 (SMART); IPR000998 (PFAM); PTHR23282 (PANTHER); PTHR23282:SF75 (PANTHER); IPR000998 (PROSITE_PROFILES); IPR013320 (SUPERFAMILY)                                                                                                                                                                                                                                                                   |

|      |                                                                                                         |      |                                                             |      |           |        |       |                                                                                                                                                                                                                                                                                                                                                                                                                                                                                                                                                                                                                                                                      |
|------|---------------------------------------------------------------------------------------------------------|------|-------------------------------------------------------------|------|-----------|--------|-------|----------------------------------------------------------------------------------------------------------------------------------------------------------------------------------------------------------------------------------------------------------------------------------------------------------------------------------------------------------------------------------------------------------------------------------------------------------------------------------------------------------------------------------------------------------------------------------------------------------------------------------------------------------------------|
| 1767 | c39209_g1_i1_len_1159_path_473_0_105_57_8_106_950_1419_951_1055_1523_1056_1057_23_1058_1158_0           | 443  | mesencephalic astrocyte-derived neurotrophic factor homolog | 387  | 1.20E-76  | 84.80% | 0.144 | IPR019345 (PFAM); IPR011001 (G3DSA:1.10.225.GENE3D); PTHR12990 (PANTHER); PTHR12990:SF5 (PANTHER); TRANSMEMBRANE (PHOBIUS); CYTOPLASMIC_DOMAIN (PHOBIUS); NON_CYTOPLASMIC_DOMAIN (PHOBIUS); SSF68906 (SUPERFAMILY); TMhelix (TMHMM)                                                                                                                                                                                                                                                                                                                                                                                                                                  |
| 1768 | c39243_g1_i1_len_2305_path_207_0_275_48_3_276_629_837_630_1732_1935_1733_2018_1935_2019_2304_1          | 238  | dnaj homolog subfamily c member 7                           | 768  | 0         | 74.80% | 0.104 | IPR001623 (PRINTS); IPR001623 (SMART); IPR019734 (SMART); IPR011990 (G3DSA:1.25.40.GENE3D); IPR011990 (G3DSA:1.25.40.GENE3D); IPR013105 (PFAM); IPR019734 (PFAM); IPR001623 (PFAM); PF13414 (PFAM); IPR001623 (G3DSA:1.10.287.GENE3D); PTHR24078 (PANTHER); PTHR24078:SF140 (PANTHER); IPR018253 (PROSITE_PATTERNS); IPR019734 (PROSITE_PROFILES); IPR001623 (PROSITE_PROFILES); IPR019734 (PROSITE_PROFILES); IPR019734 (PROSITE_PROFILES); IPR013026 (PROSITE_PROFILES); IPR019734 (PROSITE_PROFILES); IPR019734 (PROSITE_PROFILES); IPR019734 (PROSITE_PROFILES); SSF48452 (SUPERFAMILY); SSF48452 (SUPERFAMILY); IPR001623 (SUPERFAMILY); SSF48452 (SUPERFAMILY) |
| 1769 | c39243_g1_i2_len_2128_path_4279_0_98_48_3_99_452_837_453_1555_1935_1556_1841_1935_1842_2127_1           | 238  | dnaj homolog subfamily c member 7                           | 709  | 0         | 73.60% | 0.104 | IPR001623 (PRINTS); IPR019734 (SMART); IPR001623 (SMART); IPR019734 (PFAM); PF13414 (PFAM); IPR001623 (G3DSA:1.10.287.GENE3D); IPR011990 (G3DSA:1.25.40.GENE3D); IPR013105 (PFAM); IPR011990 (G3DSA:1.25.40.GENE3D); IPR001623 (PFAM); PTHR24078 (PANTHER); PTHR24078:SF140 (PANTHER); IPR018253 (PROSITE_PATTERNS); IPR019734 (PROSITE_PROFILES); IPR019734 (PROSITE_PROFILES); IPR019734 (PROSITE_PROFILES); IPR019734 (PROSITE_PROFILES); IPR013026 (PROSITE_PROFILES); IPR019734 (PROSITE_PROFILES); IPR019734 (PROSITE_PROFILES); IPR019734 (PROSITE_PROFILES); SSF48452 (SUPERFAMILY); SSF48452 (SUPERFAMILY); IPR001623 (SUPERFAMILY); SSF48452 (SUPERFAMILY) |
| 1770 | c39248_g2_i2_len_597_path_1084_0_39_112_4_40_83_25_84_205_147_206_229_3668_23_0_232_174_233_251_193_2_2 | 33   | cre-ptr-16 protein                                          | 199  | 6.39E-17  | 62.00% | 0.137 | PTHR11660:SF46 (PANTHER); PTHR11660 (PANTHER)                                                                                                                                                                                                                                                                                                                                                                                                                                                                                                                                                                                                                        |
| 1771 | c39255_g1_i1_len_2051_path_2187_0_1345_4245_1346_1471_3525_1472_1670_3723_1_671_1690_147_1691_205_0     | 347  | protein tumorous imaginal mitochondrial-like isoform x2     | 684  | 0         | 75.00% | 0.23  | IPR001623 (PRINTS); IPR001623 (SMART); IPR002939 (PFAM); IPR001305 (PFAM); IPR001305 (G3DSA:2.10.230.GENE3D); G3DSA:2.60.260.20 (GENE3D); IPR001623 (PFAM); IPR001623 (G3DSA:1.10.287.GENE3D); PTHR24078 (PANTHER); PTHR24078:SF79 (PANTHER); IPR018253 (PROSITE_PATTERNS); CYTOPLASMIC_DOMAIN (PHOBIUS); NON_CYTOPLASMIC_DOMAIN (PHOBIUS); TRANSMEMBRANE (PHOBIUS); IPR012724 (HAMAP); IPR001305 (PROSITE_PROFILES); IPR001623 (PROSITE_PROFILES); IPR008971 (SUPERFAMILY); IPR001305 (SUPERFAMILY); IPR001623 (SUPERFAMILY); IPR008971 (SUPERFAMILY); TMhelix (TMHMM)                                                                                              |
| 1772 | c39255_g1_i2_len_1925_path_2187_0_1345_3525_1346_1544_3723_1545_1564_147_15_65_1924_0                   | 370  | protein tumorous imaginal mitochondrial-like isoform x2     | 642  | 0         | 74.90% | 0.23  | IPR001623 (PRINTS); IPR001623 (SMART); IPR002939 (PFAM); IPR001623 (PFAM); IPR001623 (G3DSA:1.10.287.GENE3D); G3DSA:2.60.260.20 (GENE3D); IPR001305 (PFAM); IPR001305 (G3DSA:2.10.230.GENE3D); PTHR24078 (PANTHER); PTHR24078:SF79 (PANTHER); IPR018253 (PROSITE_PATTERNS); CYTOPLASMIC_DOMAIN (PHOBIUS); TRANSMEMBRANE (PHOBIUS); NON_CYTOPLASMIC_DOMAIN (PHOBIUS); IPR001623 (PROSITE_PROFILES); IPR012724 (HAMAP); IPR001305 (PROSITE_PROFILES); IPR001623 (SUPERFAMILY); IPR008971 (SUPERFAMILY); IPR008971 (SUPERFAMILY); IPR001305 (SUPERFAMILY); TMhelix (TMHMM)                                                                                              |
| 1773 | c39275_g1_i1_len_2244_path_2295_0_2243_4                                                                | 1000 | catalase                                                    | 748  | 0         | 84.60% | 0.153 | IPR018028 (PRINTS); IPR011614 (SMART); IPR010582 (PFAM); IPR011614 (PFAM); IPR011614 (G3DSA:2.40.180.GENE3D); IPR018028 (PANTHER); IPR002226 (PROSITE_PATTERNS); IPR024708 (PROSITE_PATTERNS); IPR018028 (PROSITE_PROFILES); IPR020835 (SUPERFAMILY)                                                                                                                                                                                                                                                                                                                                                                                                                 |
| 1774 | c39300_g1_i1_len_2180_path_2258_0_1603_4746_1604_2179_2                                                 | 268  | alkaline phosphatase                                        | 726  | 5.72E-172 | 64.40% | 0.116 | IPR001952 (PRINTS); IPR001952 (SMART); IPR001952 (PFAM); IPR017849 (G3DSA:3.40.720.GENE3D); PTHR11596 (PANTHER); IPR018299 (PROSITE_PATTERNS); IPR017850 (SUPERFAMILY)                                                                                                                                                                                                                                                                                                                                                                                                                                                                                               |
| 1775 | c39302_g1_i1_len_3137_path_4862_0_1087_8248_1088_1088_5946_1089_3136_3                                  | 386  | peptidyl-prolyl cis-trans mitochondrial                     | 1046 | 2.40E-137 | 56.40% | 0.175 | IPR001841 (SMART); IPR013083 (G3DSA:3.30.40.GENE3D); IPR029000 (G3DSA:2.40.100.GENE3D); IPR002130 (PFAM); IPR024936 (PANTHER); IPR017907 (PROSITE_PATTERNS); NON_CYTOPLASMIC_DOMAIN (PHOBIUS); TRANSMEMBRANE (PHOBIUS); NON_CYTOPLASMIC_DOMAIN (PHOBIUS); TRANSMEMBRANE (PHOBIUS); CYTOPLASMIC_DOMAIN (PHOBIUS); IPR000315 (PROSITE_PROFILES); IPR001841 (PROSITE_PROFILES); IPR002130 (PROSITE_PROFILES); IPR029000 (SUPERFAMILY); SSF57850 (SUPERFAMILY); SSF57845 (SUPERFAMILY)                                                                                                                                                                                   |



|      |                                                                                                  |      |                                                       |      |           |        |       |                                                                                                                                                                                                                                                                                                                                                                                                                                                                                                                                                                                                                                                                                                             |
|------|--------------------------------------------------------------------------------------------------|------|-------------------------------------------------------|------|-----------|--------|-------|-------------------------------------------------------------------------------------------------------------------------------------------------------------------------------------------------------------------------------------------------------------------------------------------------------------------------------------------------------------------------------------------------------------------------------------------------------------------------------------------------------------------------------------------------------------------------------------------------------------------------------------------------------------------------------------------------------------|
| 1776 | c39309_g1_i1_len_554_path_2199_0_84_175_5_85_553_4                                               | 63   | cationic trypsin-3-like                               | 185  | 5.66E-17  | 60.60% | 0.335 | IPR001254 (SMART); IPR001254 (PFAM); G3DSA:2.40.10.10 (GENE3D); G3DSA:2.40.10.10 (GENE3D); PTHR24276 (PANTHER); IPR018114 (PROSITE_PATTERNS); TRANSMEMBRANE (PHOBIUS); CYTOPLASMIC_DOMAIN (PHOBIUS); NON_CYTOPLASMIC_DOMAIN (PHOBIUS); IPR001254 (PROSITE_PROFILES); SignalP-TM (SIGNALP_GRAM_POSITIVE); IPR009003 (SUPERFAMILY); TMhelix (TMHMM)                                                                                                                                                                                                                                                                                                                                                           |
| 1777 | c39309_g1_i2_len_1098_path_1126_0_628_1_755_629_1097_4                                           | 230  | trypsin 3                                             | 366  | 4.11E-57  | 61.00% | 0.335 | IPR001314 (PRINTS); IPR001254 (SMART); G3DSA:2.40.10.10 (GENE3D); IPR001254 (PFAM); G3DSA:2.40.10.10 (GENE3D); G3DSA:2.40.10.10 (GENE3D); PTHR24265 (PANTHER); IPR018114 (PROSITE_PATTERNS); NON_CYTOPLASMIC_DOMAIN (PHOBIUS); CYTOPLASMIC_DOMAIN (PHOBIUS); TRANSMEMBRANE (PHOBIUS); TRANSMEMBRANE (PHOBIUS); CYTOPLASMIC_DOMAIN (PHOBIUS); IPR001254 (PROSITE_PROFILES); SignalP-TM (SIGNALP_GRAM_POSITIVE); IPR009003 (SUPERFAMILY); TMhelix (TMHMM)                                                                                                                                                                                                                                                     |
| 1778 | c39316_g1_i1_len_2531_path_2609_0_1294_3900_1295_2530_4                                          | 7693 | scp-like extracellular domain containing protein 1    | 844  | 1.65E-67  | 61.60% | 0.295 | IPR001283 (PRINTS); IPR002413 (PRINTS); IPR014044 (SMART); IPR014044 (PFAM); IPR014044 (G3DSA:3.40.33.GENE3D); IPR001283 (PANTHER); PTHR10334:SF174 (PANTHER); IPR018244 (PROSITE_PATTERNS); IPR018244 (PROSITE_PATTERNS); TRANSMEMBRANE (PHOBIUS); CYTOPLASMIC_DOMAIN (PHOBIUS); TRANSMEMBRANE (PHOBIUS); NON_CYTOPLASMIC_DOMAIN (PHOBIUS); CYTOPLASMIC_DOMAIN (PHOBIUS); NON_CYTOPLASMIC_DOMAIN (PHOBIUS); TRANSMEMBRANE (PHOBIUS); IPR000998 (PROSITE_PROFILES); IPR014044 (SUPERFAMILY); IPR013320 (SUPERFAMILY); TMhelix (TMHMM); TMhelix (TMHMM)                                                                                                                                                      |
| 1779 | c39335_g1_i1_len_1254_path_1381_0_1051_2826_1052_1253_4                                          | 396  | aldose reductase                                      | 418  | 2.92E-153 | 77.60% | 0.2   | IPR020471 (PRINTS); IPR023210 (PFAM); IPR023210 (G3DSA:3.20.20.GENE3D); PTHR11732:SF202 (PANTHER); IPR001395 (PANTHER); IPR018170 (PROSITE_PATTERNS); IPR018170 (PROSITE_PATTERNS); IPR018170 (PROSITE_PATTERNS); IPR023210 (SUPERFAMILY)                                                                                                                                                                                                                                                                                                                                                                                                                                                                   |
| 1780 | c39336_g3_i1_len_5750_path_6686_0_2168_374_2169_3412_727_3413_3580_12894_3_581_5690_12200_5691_4 | 1937 | lethal giant larvae protein homolog 1-like isoform x4 | 1917 | 0         | 67.80% | 0.175 | Coil (COILS); Coil (COILS); IPR000664 (PRINTS); IPR001680 (SMART); IPR015943 (G3DSA:2.130.10.GENE3D); IPR013905 (PFAM); IPR013577 (PFAM); PTHR10241 (PANTHER); PTHR10241:SF28 (PANTHER); IPR019775 (PROSITE_PATTERNS); IPR019775 (PROSITE_PATTERNS); TRANSMEMBRANE (PHOBIUS); TRANSMEMBRANE (PHOBIUS); TRANSMEMBRANE (PHOBIUS); CYTOPLASMIC_DOMAIN (PHOBIUS); TRANSMEMBRANE (PHOBIUS); NON_CYTOPLASMIC_DOMAIN (PHOBIUS); NON_CYTOPLASMIC_DOMAIN (PHOBIUS); CYTOPLASMIC_DOMAIN (PHOBIUS); NON_CYTOPLASMIC_DOMAIN (PHOBIUS); IPR001680 (PROSITE_PROFILES); IPR017986 (PROSITE_PROFILES); IPR017986 (SUPERFAMILY); IPR017986 (SUPERFAMILY); TMhelix (TMHMM); TMhelix (TMHMM); TMhelix (TMHMM); TMhelix (TMHMM) |
| 1781 | c39336_g3_i2_len_5582_path_6686_0_2168_374_2169_3412_12894_3413_5522_12200_5523_5543_420_5544_4  | 2001 | lethal giant larvae protein homolog 1-like isoform x5 | 1861 | 0         | 71.00% | 0.175 | Coil (COILS); Coil (COILS); IPR000664 (PRINTS); IPR001680 (SMART); IPR013577 (PFAM); IPR013905 (PFAM); IPR015943 (G3DSA:2.130.10.GENE3D); PTHR10241 (PANTHER); PTHR10241:SF28 (PANTHER); IPR019775 (PROSITE_PATTERNS); IPR019775 (PROSITE_PATTERNS); TRANSMEMBRANE (PHOBIUS); TRANSMEMBRANE (PHOBIUS); TRANSMEMBRANE (PHOBIUS); CYTOPLASMIC_DOMAIN (PHOBIUS); TRANSMEMBRANE (PHOBIUS); NON_CYTOPLASMIC_DOMAIN (PHOBIUS); CYTOPLASMIC_DOMAIN (PHOBIUS); NON_CYTOPLASMIC_DOMAIN (PHOBIUS); IPR017986 (PROSITE_PROFILES); IPR001680 (PROSITE_PROFILES); IPR017986 (SUPERFAMILY); IPR017986 (SUPERFAMILY); TMhelix (TMHMM); TMhelix (TMHMM); TMhelix (TMHMM); TMhelix (TMHMM)                                   |
| 1782 | c39348_g1_i1_len_2722_path_155_0_1483_1_639_1484_2393_2544_2394_2395_154_239_6_2721_0            | 352  | dnaj homolog subfamily b member 11                    | 908  | 0         | 84.10% | 0.231 | IPR001623 (PRINTS); IPR001623 (SMART); IPR002939 (PFAM); IPR001623 (PFAM); G3DSA:2.60.260.20 (GENE3D); IPR001623 (G3DSA:1.10.287.GENE3D); G3DSA:2.60.260.20 (GENE3D); PTHR24077 (PANTHER); PTHR24077:SF210 (PANTHER); IPR018253 (PROSITE_PATTERNS); CYTOPLASMIC_DOMAIN (PHOBIUS); CYTOPLASMIC_DOMAIN (PHOBIUS); TRANSMEMBRANE (PHOBIUS); NON_CYTOPLASMIC_DOMAIN (PHOBIUS); NON_CYTOPLASMIC_DOMAIN (PHOBIUS); TRANSMEMBRANE (PHOBIUS); TRANSMEMBRANE (PHOBIUS); IPR001623 (PROSITE_PROFILES); SignalP-TM (SIGNALP_GRAM_POSITIVE); IPR008971 (SUPERFAMILY); IPR008971 (SUPERFAMILY); IPR001623 (SUPERFAMILY); TMhelix (TMHMM); TMhelix (TMHMM); TMhelix (TMHMM)                                               |

|      |                                                                                                        |      |                                                |     |           |        |         |                                                                                                                                                                                                                                                                                                                                                                                                                                                                                                                                                                                  |
|------|--------------------------------------------------------------------------------------------------------|------|------------------------------------------------|-----|-----------|--------|---------|----------------------------------------------------------------------------------------------------------------------------------------------------------------------------------------------------------------------------------------------------------------------------------------------------------------------------------------------------------------------------------------------------------------------------------------------------------------------------------------------------------------------------------------------------------------------------------|
| 1783 | c39359_g1_i1_len_2332_path_2825_0_2031_30_2032_2063_30_2064_2095_5106_2096_2_100_399_2101_2331_0       | 977  | iron zinc purple acid phosphatase-like protein | 778 | 0         | 74.90% | 0.22    | IPR015914 (G3DSA:2.60.40.GENE3D); IPR004843 (PFAM); IPR029052 (G3DSA:3.60.21.GENE3D); IPR025733 (PFAM); PTHR22953:SF9 (PANTHER); PTHR22953 (PANTHER); CYTOPLASMIC_DOMAIN (PHOBIUS); TRANSMEMBRANE (PHOBIUS); CYTOPLASMIC_DOMAIN (PHOBIUS); NON_CYTOPLASMIC_DOMAIN (PHOBIUS); TRANSMEMBRANE (PHOBIUS); NON_CYTOPLASMIC_DOMAIN (PHOBIUS); IPR008963 (SUPERFAMILY); IPR029052 (SUPERFAMILY); TMhelix (TMHMM)                                                                                                                                                                        |
| 1784 | c39359_g1_i2_len_2364_path_2825_0_2031_30_2032_2063_30_2064_2095_30_2096_212_7_5106_2128_2132_399_21_0 | 1035 | iron zinc purple acid phosphatase-like protein | 788 | 0         | 74.70% | 0.22    | IPR025733 (PFAM); IPR015914 (G3DSA:2.60.40.GENE3D); IPR029052 (G3DSA:3.60.21.GENE3D); IPR004843 (PFAM); PTHR22953 (PANTHER); PTHR22953:SF9 (PANTHER); CYTOPLASMIC_DOMAIN (PHOBIUS); TRANSMEMBRANE (PHOBIUS); NON_CYTOPLASMIC_DOMAIN (PHOBIUS); CYTOPLASMIC_DOMAIN (PHOBIUS); TRANSMEMBRANE (PHOBIUS); NON_CYTOPLASMIC_DOMAIN (PHOBIUS); IPR029052 (SUPERFAMILY); IPR008963 (SUPERFAMILY); TMhelix (TMHMM)                                                                                                                                                                        |
| 1785 | c39376_g1_i1_len_1552_path_53_0_121_175_122_140_194_141_372_3425_373_525_57_7_526_1551_0               | 341  | 3-hydroxyisobutyrate dehydrogenase             | 518 | 9.18E-65  | 55.40% | 0.434Y  | IPR029154 (PFAM); IPR013328 (G3DSA:1.10.1040.GENE3D); IPR006115 (PFAM); IPR016040 (G3DSA:3.40.50.GENE3D); PTHR22981 (PANTHER); PTHR22981:SF7 (PANTHER); IPR029752 (PROSITE_PATTERNS); IPR008927 (SUPERFAMILY); SSF51735 (SUPERFAMILY)                                                                                                                                                                                                                                                                                                                                            |
| 1786 | c39376_g1_i2_len_1399_path_53_0_121_175_122_140_194_141_372_577_373_1398_0                             | 252  | 3-hydroxyisobutyrate dehydrogenase             | 467 | 1.38E-56  | 55.10% | 0.434 Y | IPR029154 (PFAM); IPR016040 (G3DSA:3.40.50.GENE3D); IPR006115 (PFAM); IPR013328 (G3DSA:1.10.1040.GENE3D); PTHR22981 (PANTHER); PTHR22981:SF7 (PANTHER); IPR008927 (SUPERFAMILY); SSF51735 (SUPERFAMILY)                                                                                                                                                                                                                                                                                                                                                                          |
| 1787 | c39389_g1_i1_len_219_path_269_0_27_297_28_87_938_88_91_942_92_94_361_95_97_3_64_98_121_154_122_218_0   | 7    | ankyrin repeat domain-containing protein 2     | 73  | 1.02E-13  | 61.00% | 0.118   | IPR002110 (SMART); IPR020683 (G3DSA:1.25.40.GENE3D); IPR020683 (PFAM); PTHR24193 (PANTHER); IPR002110 (PROSITE_PROFILES); IPR020683 (PROSITE_PROFILES); IPR002110 (PROSITE_PROFILES); IPR020683 (SUPERFAMILY)                                                                                                                                                                                                                                                                                                                                                                    |
| 1788 | c39398_g1_i1_len_1300_path_2991_0_190_1_911_191_369_2087_370_414_298_415_478_2195_479_521_2238_522_5_3 | 78   | phospholipase b-like 2                         | 434 | 2.30E-160 | 72.50% | 0.101   | IPR007000 (PFAM); IPR007000 (PANTHER); PTHR12370:SF3 (PANTHER)                                                                                                                                                                                                                                                                                                                                                                                                                                                                                                                   |
| 1789 | c39398_g1_i2_len_1341_path_1680_0_19_21_20_231_1911_232_410_253_411_455_298_456_519_3396_520_562_22_3  | 86   | phospholipase b-like 2                         | 447 | 1.10E-159 | 72.80% | 0.101   | IPR007000 (PFAM); PTHR12370:SF3 (PANTHER); IPR007000 (PANTHER)                                                                                                                                                                                                                                                                                                                                                                                                                                                                                                                   |
| 1790 | c39401_g1_i1_len_1232_path_1842_0_529_1_30_530_638_2804_639_666_53_667_1231_5                          | 469  | calponin transgelin                            | 410 | 1.94E-89  | 86.40% | 0.464 Y | IPR003096 (PRINTS); IPR001997 (PRINTS); IPR001715 (SMART); IPR001715 (PFAM); IPR000557 (PFAM); IPR001715 (G3DSA:1.10.418.GENE3D); PTHR18959 (PANTHER); PTHR18959:SF51 (PANTHER); IPR001715 (PROSITE_PROFILES); IPR000557 (PROSITE_PROFILES); SignalP-noTM (SIGNALP_EUK); IPR001715 (SUPERFAMILY)                                                                                                                                                                                                                                                                                 |
| 1791 | c39401_g1_i2_len_1564_path_1842_0_529_2_367_530_861_130_862_970_2804_971_998_53_999_1563_5             | 819  | calponin transgelin                            | 521 | 6.28E-88  | 86.40% | 0.464 Y | IPR001997 (PRINTS); IPR003096 (PRINTS); IPR001715 (SMART); IPR001715 (PFAM); IPR001715 (G3DSA:1.10.418.GENE3D); IPR000557 (PFAM); PTHR18959:SF51 (PANTHER); PTHR18959 (PANTHER); TRANSMEMBRANE (PHOBIUS); CYTOPLASMIC_DOMAIN (PHOBIUS); TRANSMEMBRANE (PHOBIUS); NON_CYTOPLASMIC_DOMAIN (PHOBIUS); TRANSMEMBRANE (PHOBIUS); NON_CYTOPLASMIC_DOMAIN (PHOBIUS); CYTOPLASMIC_DOMAIN (PHOBIUS); IPR001715 (PROSITE_PROFILES); IPR000557 (PROSITE_PROFILES); SignalP-noTM (SIGNALP_EUK); IPR001715 (SUPERFAMILY)                                                                      |
| 1792 | c39403_g1_i1_len_2553_path_2177_0_1552_2022_1553_1588_964_1589_2114_1490_211_5_2138_4274_2139_2552_3   | 319  | alkaline phosphatase 4-like                    | 851 | 7.26E-156 | 64.20% | 0.519Y  | IPR001952 (PRINTS); IPR001952 (SMART); IPR017849 (G3DSA:3.40.720.GENE3D); IPR001952 (PFAM); PTHR11596 (PANTHER); IPR018299 (PROSITE_PATTERNS); SIGNAL_PEPTIDE_H_REGION (PHOBIUS); NON_CYTOPLASMIC_DOMAIN (PHOBIUS); CYTOPLASMIC_DOMAIN (PHOBIUS); NON_CYTOPLASMIC_DOMAIN (PHOBIUS); SIGNAL_PEPTIDE (PHOBIUS); TRANSMEMBRANE (PHOBIUS); CYTOPLASMIC_DOMAIN (PHOBIUS); TRANSMEMBRANE (PHOBIUS); SIGNAL_PEPTIDE_N_REGION (PHOBIUS); SIGNAL_PEPTIDE_C_REGION (PHOBIUS); TRANSMEMBRANE (PHOBIUS); SignalP-TM (SIGNALP_EUK); IPR017850 (SUPERFAMILY); TMhelix (TMHMM); TMhelix (TMHMM) |
| 1793 | c39403_g2_i1_len_1035_path_1921_0_100_2_022_101_136_3761_137_626_1490_627_650_1514_651_1034_3          | 51   | alkaline tissue-nonspecific isozyme-like       | 345 | 1.62E-96  | 64.40% | 0.167   | IPR001952 (PRINTS); IPR001952 (SMART); IPR001952 (PFAM); IPR017849 (G3DSA:3.40.720.GENE3D); PTHR11596 (PANTHER); IPR018299 (PROSITE_PATTERNS); IPR017850 (SUPERFAMILY)                                                                                                                                                                                                                                                                                                                                                                                                           |

|      |                                                                                                       |      |                                                         |     |          |        |       |                                                                                                                                                                                                                                                                                                                                                                                                                                                                                                                                                                                                                                                                                                                                                                                                                                  |
|------|-------------------------------------------------------------------------------------------------------|------|---------------------------------------------------------|-----|----------|--------|-------|----------------------------------------------------------------------------------------------------------------------------------------------------------------------------------------------------------------------------------------------------------------------------------------------------------------------------------------------------------------------------------------------------------------------------------------------------------------------------------------------------------------------------------------------------------------------------------------------------------------------------------------------------------------------------------------------------------------------------------------------------------------------------------------------------------------------------------|
| 1794 | c39418_g1_i1_len_2875_path_3257_0_1680_5054_1681_2065_5436_2066_2083_95_2084_2874_0                   | 1249 | proactivator polypeptide                                | 959 | 0        | 52.20% | 0.207 | IPR008373 (PRINTS); IPR003119 (SMART); IPR008139 (SMART); IPR007856 (PFAM); IPR011001 (G3DSA:1.10.225.GENE3D); IPR011001 (G3DSA:1.10.225.GENE3D); IPR008138 (PFAM); IPR011001 (G3DSA:1.10.225.GENE3D); IPR003119 (PFAM); IPR011001 (G3DSA:1.10.225.GENE3D); PTHR11480 (PANTHER); PTHR11480:SF3 (PANTHER); TRANSMEMBRANE (PHOBIUS); NON_CYTOPLASMIC_DOMAIN (PHOBIUS); CYTOPLASMIC_DOMAIN (PHOBIUS); IPR008139 (PROSITE_PROFILES); IPR003119 (PROSITE_PROFILES); IPR008139 (PROSITE_PROFILES); IPR008139 (PROSITE_PROFILES); IPR008139 (PROSITE_PROFILES); IPR003119 (PROSITE_PROFILES); IPR008139 (PROSITE_PROFILES); IPR011001 (SUPERFAMILY); IPR011001 (SUPERFAMILY); IPR011001 (SUPERFAMILY); IPR011001 (SUPERFAMILY); IPR011001 (SUPERFAMILY); IPR011001 (SUPERFAMILY); IPR011001 (SUPERFAMILY)                               |
| 1795 | c39418_g1_i2_len_2995_path_3257_0_1680_4934_1681_1800_5054_1801_2185_5436_2186_2203_95_2204_2994_0    | 1401 | proactivator polypeptide-like                           | 999 | 0        | 54.80% | 0.207 | IPR008373 (PRINTS); IPR003119 (SMART); IPR008139 (SMART); IPR011001 (G3DSA:1.10.225.GENE3D); IPR011001 (G3DSA:1.10.225.GENE3D); IPR007856 (PFAM); IPR008138 (PFAM); IPR011001 (G3DSA:1.10.225.GENE3D); IPR003119 (PFAM); IPR011001 (G3DSA:1.10.225.GENE3D); PTHR11480 (PANTHER); PTHR11480:SF3 (PANTHER); CYTOPLASMIC_DOMAIN (PHOBIUS); TRANSMEMBRANE (PHOBIUS); NON_CYTOPLASMIC_DOMAIN (PHOBIUS); IPR008139 (PROSITE_PROFILES); IPR008139 (PROSITE_PROFILES); IPR003119 (PROSITE_PROFILES); IPR008139 (PROSITE_PROFILES); IPR008139 (PROSITE_PROFILES); IPR003119 (PROSITE_PROFILES); IPR008139 (PROSITE_PROFILES); IPR008139 (PROSITE_PROFILES); IPR011001 (SUPERFAMILY); IPR011001 (SUPERFAMILY); IPR011001 (SUPERFAMILY); IPR011001 (SUPERFAMILY); IPR011001 (SUPERFAMILY); IPR011001 (SUPERFAMILY); IPR011001 (SUPERFAMILY) |
| 1796 | c39420_g1_i1_len_2009_path_2501_0_1252_23_1253_1425_196_1426_2008_5                                   | 1494 | fk506-binding protein 2 isoform x2                      | 669 | 9.26E-94 | 78.50% | 0.234 | G3DSA:3.10.50.40 (GENE3D); IPR001179 (PFAM); IPR011992 (G3DSA:1.10.238.GENE3D); IPR011992 (PFAM); PTHR10516:SF252 (PANTHER); IPR023566 (PANTHER); IPR018247 (PROSITE_PATTERNS); IPR018247 (PROSITE_PATTERNS); SIGNAL_PEPTIDE_C_REGION (PHOBIUS); NON_CYTOPLASMIC_DOMAIN (PHOBIUS); CYTOPLASMIC_DOMAIN (PHOBIUS); SIGNAL_PEPTIDE_H_REGION (PHOBIUS); TRANSMEMBRANE (PHOBIUS); TRANSMEMBRANE (PHOBIUS); SIGNAL_PEPTIDE_N_REGION (PHOBIUS); TRANSMEMBRANE (PHOBIUS); SIGNAL_PEPTIDE (PHOBIUS); NON_CYTOPLASMIC_DOMAIN (PHOBIUS); IPR002048 (PROSITE_PROFILES); IPR001179 (PROSITE_PROFILES); IPR002048 (PROSITE_PROFILES); SSF47473 (SUPERFAMILY); SSF54534 (SUPERFAMILY); TMhelix (TMHMM); TMhelix (TMHMM); TMhelix (TMHMM)                                                                                                        |
| 1797 | c39420_g1_i2_len_1836_path_2501_0_1252_196_1253_1835_5                                                | 1749 | fk506-binding protein 2 isoform x2                      | 612 | 8.41E-98 | 79.60% | 0.234 | IPR001179 (PFAM); G3DSA:3.10.50.40 (GENE3D); IPR011992 (G3DSA:1.10.238.GENE3D); IPR011992 (PFAM); PTHR10516:SF252 (PANTHER); IPR023566 (PANTHER); IPR018247 (PROSITE_PATTERNS); IPR018247 (PROSITE_PATTERNS); SIGNAL_PEPTIDE (PHOBIUS); NON_CYTOPLASMIC_DOMAIN (PHOBIUS); NON_CYTOPLASMIC_DOMAIN (PHOBIUS); TRANSMEMBRANE (PHOBIUS); NON_CYTOPLASMIC_DOMAIN (PHOBIUS); TRANSMEMBRANE (PHOBIUS); SIGNAL_PEPTIDE_H_REGION (PHOBIUS); SIGNAL_PEPTIDE_N_REGION (PHOBIUS); CYTOPLASMIC_DOMAIN (PHOBIUS); SIGNAL_PEPTIDE_C_REGION (PHOBIUS); TRANSMEMBRANE (PHOBIUS); TRANSMEMBRANE (PHOBIUS); CYTOPLASMIC_DOMAIN (PHOBIUS); IPR001179 (PROSITE_PROFILES); IPR002048 (PROSITE_PROFILES); IPR002048 (PROSITE_PROFILES); SSF47473 (SUPERFAMILY); SSF54534 (SUPERFAMILY); TMhelix (TMHMM); TMhelix (TMHMM); TMhelix (TMHMM)               |
| 1798 | c39421_g1_i1_len_848_path_276_0_36_313_37_70_2307_71_88_682_89_250_455_251_271_476_272_797_2463_798_5 | 202  | translocase of inner mitochondrial membrane 8 homolog b | 282 | 7.06E-32 | 78.30% | 0.103 | IPR004217 (PFAM); IPR004217 (G3DSA:1.10.287.GENE3D); PTHR21535:SF25 (PANTHER); PTHR21535 (PANTHER); CYTOPLASMIC_DOMAIN (PHOBIUS); TRANSMEMBRANE (PHOBIUS); NON_CYTOPLASMIC_DOMAIN (PHOBIUS); IPR004217 (SUPERFAMILY); TMhelix (TMHMM)                                                                                                                                                                                                                                                                                                                                                                                                                                                                                                                                                                                            |

|      |                                                                                                       |      |                                                        |      |          |        |         |                                                                                                                                                                                                                                                                                                                                                                                                                                                                                                                                                                   |
|------|-------------------------------------------------------------------------------------------------------|------|--------------------------------------------------------|------|----------|--------|---------|-------------------------------------------------------------------------------------------------------------------------------------------------------------------------------------------------------------------------------------------------------------------------------------------------------------------------------------------------------------------------------------------------------------------------------------------------------------------------------------------------------------------------------------------------------------------|
| 1799 | c39438_g4_i2_len_3687_path_4310_0_990_1_4316_991_1636_10412_1637_1777_5947_1778_2129_6299_2130_4      | 509  | serine threonine-protein kinase mark2-like isoform x10 | 1229 | 0        | 72.40% | 0.184   | IPR015940 (SMART); IPR002290 (SMART); IPR000719 (PFAM); G3DSA:1.10.8.10 (GENE3D); G3DSA:1.10.510.10 (GENE3D); G3DSA:3.30.200.20 (GENE3D); IPR028375 (G3DSA:3.30.310.GENE3D); PTHR24346 (PANTHER); IPR008271 (PROSITE_PATTERNS); IPR017441 (PROSITE_PATTERNS); IPR000719 (PROSITE_PROFILES); IPR015940 (PROSITE_PROFILES); IPR011009 (SUPERFAMILY); IPR028375 (SUPERFAMILY)                                                                                                                                                                                        |
| 1800 | c39438_g4_i3_len_1804_path_321_0_231_55_3_232_246_6299_247_404_6457_405_1714_7767_1715_1803_4         | 175  | serine threonine-protein kinase mark2-like isoform x10 | 601  | 0        | 87.70% | 0.184   | IPR002290 (SMART); IPR015940 (SMART); G3DSA:3.30.200.20 (GENE3D); G3DSA:1.10.8.10 (GENE3D); G3DSA:1.10.510.10 (GENE3D); IPR000719 (PFAM); PTHR24346 (PANTHER); IPR017441 (PROSITE_PATTERNS); IPR008271 (PROSITE_PATTERNS); IPR015940 (PROSITE_PROFILES); IPR000719 (PROSITE_PROFILES); IPR011009 (SUPERFAMILY)                                                                                                                                                                                                                                                    |
| 1801 | c39438_g4_i4_len_3561_path_4310_0_990_1_4316_991_1636_5947_1637_1988_553_19_89_2003_6299_2004_2_4     | 552  | serine threonine-protein kinase mark2-like isoform x10 | 1187 | 0        | 74.80% | 0.184   | IPR015940 (SMART); IPR002290 (SMART); IPR028375 (G3DSA:3.30.310.GENE3D); G3DSA:1.10.510.10 (GENE3D); G3DSA:3.30.200.20 (GENE3D); G3DSA:1.10.8.10 (GENE3D); IPR000719 (PFAM); PTHR24346 (PANTHER); IPR008271 (PROSITE_PATTERNS); IPR017441 (PROSITE_PATTERNS); IPR015940 (PROSITE_PROFILES); IPR000719 (PROSITE_PROFILES); IPR028375 (SUPERFAMILY); IPR011009 (SUPERFAMILY)                                                                                                                                                                                        |
| 1802 | c39438_g4_i5_len_3546_path_4310_0_990_1_4316_991_1636_5947_1637_1988_6299_1_989_2146_6457_2147_4      | 558  | serine threonine-protein kinase mark2-like isoform x10 | 1182 | 0        | 74.10% | 0.184   | IPR015940 (SMART); IPR002290 (SMART); G3DSA:1.10.510.10 (GENE3D); IPR028375 (G3DSA:3.30.310.GENE3D); G3DSA:3.30.200.20 (GENE3D); G3DSA:1.10.8.10 (GENE3D); IPR000719 (PFAM); PTHR24346 (PANTHER); IPR008271 (PROSITE_PATTERNS); IPR017441 (PROSITE_PATTERNS); IPR000719 (PROSITE_PROFILES); IPR015940 (PROSITE_PROFILES); IPR028375 (SUPERFAMILY); IPR011009 (SUPERFAMILY)                                                                                                                                                                                        |
| 1803 | c39451_g1_i1_len_1341_path_1269_0_637_2_523_638_813_1905_814_1022_2111_1023_1_028_118_1029_1340_2     | 5361 | secreted salivary gland                                | 447  | 1.63E-28 | 46.40% | 0.706 Y | IPR004991 (PFAM); IPR023307 (G3DSA:2.170.15.GENE3D); SIGNAL_PEPTIDE_N_REGION (PHOBIUS); SIGNAL_PEPTIDE (PHOBIUS); SIGNAL_PEPTIDE_H_REGION (PHOBIUS); NON_CYTOPLASMIC_DOMAIN (PHOBIUS); TRANSMEMBRANE (PHOBIUS); CYTOPLASMIC_DOMAIN (PHOBIUS); SIGNAL_PEPTIDE_C_REGION (PHOBIUS); SignalP-noTM (SIGNALP_EUK); SSF56973 (SUPERFAMILY)                                                                                                                                                                                                                               |
| 1804 | c39452_g1_i1_len_395_path_5496_0_11_948_12_70_5202_71_100_7796_101_115_7723_116_128_7960_129_140_79_3 | 8    | zinc finger and btb domain-containing protein          | 132  | 2.74E-14 | 55.10% | 0.109   | IPR015880 (SMART); IPR013087 (G3DSA:3.30.160.GENE3D); PF13465 (PFAM); IPR013087 (G3DSA:3.30.160.GENE3D); PTHR24409 (PANTHER); PTHR24409:SF14 (PANTHER); IPR007087 (PROSITE_PATTERNS); IPR007087 (PROSITE_PATTERNS); IPR007087 (PROSITE_PROFILES); IPR007087 (PROSITE_PROFILES); IPR007087 (PROSITE_PROFILES); SSF57667 (SUPERFAMILY); SSF57667 (SUPERFAMILY)                                                                                                                                                                                                      |
| 1805 | c39452_g1_i2_len_360_path_7298_0_8_716_9_32_740_33_110_818_111_359_3                                  | 2    | zinc c2h2 type                                         | 120  | 1.45E-11 | 59.10% | 0.109   | IPR015880 (SMART); IPR013087 (G3DSA:3.30.160.GENE3D); PF13909 (PFAM); IPR007087 (PFAM); IPR013087 (G3DSA:3.30.160.GENE3D); PTHR24409:SF14 (PANTHER); PTHR24409 (PANTHER); IPR007087 (PROSITE_PATTERNS); IPR007087 (PROSITE_PATTERNS); IPR007087 (PROSITE_PROFILES); IPR007087 (PROSITE_PROFILES); IPR007087 (PROSITE_PROFILES); SSF57667 (SUPERFAMILY)                                                                                                                                                                                                            |
| 1806 | c39452_g1_i3_len_1004_path_410_0_5_416_6_29_440_30_305_716_306_329_7330_330_359_7359_360_438_3908_4_3 | 41   | zinc finger protein                                    | 335  | 1.26E-30 | 53.60% | 0.109   | IPR015880 (SMART); IPR013087 (G3DSA:3.30.160.GENE3D); IPR013087 (G3DSA:3.30.160.GENE3D); IPR007087 (PFAM); IPR013087 (G3DSA:3.30.160.GENE3D); PF13465 (PFAM); PTHR24409 (PANTHER); PTHR24409:SF14 (PANTHER); IPR007087 (PROSITE_PATTERNS); IPR007087 (PROSITE_PATTERNS); IPR007087 (PROSITE_PATTERNS); IPR007087 (PROSITE_PATTERNS); IPR007087 (PROSITE_PROFILES); IPR007087 (PROSITE_PROFILES); IPR007087 (PROSITE_PROFILES); IPR007087 (PROSITE_PROFILES); IPR007087 (PROSITE_PROFILES); SSF57667 (SUPERFAMILY); SSF57667 (SUPERFAMILY); SSF57667 (SUPERFAMILY) |

|      |                                                                                                         |      |                                                                                                                                                                             |     |           |        |       |                                                                                                                                                                                                                                                                                                                                                                                                                                                                                                                                                                                                                                                                                                                                                                                             |
|------|---------------------------------------------------------------------------------------------------------|------|-----------------------------------------------------------------------------------------------------------------------------------------------------------------------------|-----|-----------|--------|-------|---------------------------------------------------------------------------------------------------------------------------------------------------------------------------------------------------------------------------------------------------------------------------------------------------------------------------------------------------------------------------------------------------------------------------------------------------------------------------------------------------------------------------------------------------------------------------------------------------------------------------------------------------------------------------------------------------------------------------------------------------------------------------------------------|
| 1807 | c39452_g1_i4_len_805_path_4721_0_480_52_02_481_510_5595_511_538_7960_539_550_7990_551_555_818_556_80_3  | 33   | zinc finger protein 271 (zinc finger protein 7) (zinc finger protein znfpheX133) (epstein-barr virus-induced zinc finger protein) (znf-eb) (ct-zfp48) (zinc finger protein) | 269 | 1.30E-44  | 57.90% | 0.109 | IPR015880 (SMART); IPR013087 (G3DSA:3.30.160.GENE3D); IPR013087 (G3DSA:3.30.160.GENE3D); PF13465 (PFAM); PF13894 (PFAM); IPR013087 (G3DSA:3.30.160.GENE3D); PTHR24409 (PANTHER); PTHR24409:SF14 (PANTHER); IPR007087 (PROSITE_PATTERNS); IPR007087 (PROSITE_PATTERNS); IPR007087 (PROSITE_PATTERNS); IPR007087 (PROSITE_PATTERNS); IPR007087 (PROSITE_PATTERNS); IPR007087 (PROSITE_PATTERNS); IPR007087 (PROSITE_PROFILES); SSF57667 (SUPERFAMILY); SSF57667 (SUPERFAMILY); SSF57667 (SUPERFAMILY)           |
| 1808 | c39452_g3_i1_len_592_path_819_0_31_851_32_192_2145_193_216_2379_217_591_4                               | 11   | mds1 and evi1 complex locus protein evi1                                                                                                                                    | 197 | 7.20E-16  | 51.80% | 0.099 | IPR015880 (SMART); IPR013087 (G3DSA:3.30.160.GENE3D); PF13465 (PFAM); IPR013087 (G3DSA:3.30.160.GENE3D); PF13894 (PFAM); PTHR24409 (PANTHER); IPR007087 (PROSITE_PATTERNS); IPR007087 (PROSITE_PATTERNS); IPR007087 (PROSITE_PROFILES); IPR007087 (PROSITE_PROFILES); SSF57667 (SUPERFAMILY)                                                                                                                                                                                                                                                                                                                                                                                                                                                                                                |
| 1809 | c39452_g7_i1_len_214_path_7072_0_213_3                                                                  | 1    | zinc finger protein                                                                                                                                                         | 72  | 4.22E-11  | 64.70% | 0.098 | IPR015880 (SMART); IPR013087 (G3DSA:3.30.160.GENE3D); PF13894 (PFAM); IPR013087 (G3DSA:3.30.160.GENE3D); PF13465 (PFAM); PTHR24409:SF13 (PANTHER); PTHR24409 (PANTHER); IPR007087 (PROSITE_PATTERNS); IPR007087 (PROSITE_PATTERNS); IPR007087 (PROSITE_PROFILES); IPR007087 (PROSITE_PROFILES); SSF57667 (SUPERFAMILY)                                                                                                                                                                                                                                                                                                                                                                                                                                                                      |
| 1810 | c39460_g1_i1_len_2588_path_2655_0_1945_4599_1946_1947_4601_1948_2587_1                                  | 314  | nicotinamide phosphoribosyltransferase-like                                                                                                                                 | 863 | 0         | 81.60% | 0.177 | G3DSA:3.20.140.10 (GENE3D); IPR007229 (PFAM); IPR016471 (PTHR11098:PANTHER); IPR007229 (PANTHER); NON_CYTOPLASMIC_DOMAIN (PHOBIUS); NON_CYTOPLASMIC_DOMAIN (PHOBIUS); CYTOPLASMIC_DOMAIN (PHOBIUS); TRANSMEMBRANE (PHOBIUS); TRANSMEMBRANE (PHOBIUS); IPR002638 (SUPERFAMILY); TMhelix (TMHMM)                                                                                                                                                                                                                                                                                                                                                                                                                                                                                              |
| 1811 | c39462_g1_i1_len_2409_path_2912_0_567_2_5_568_782_240_783_2065_4971_2066_208_2_4988_2083_2408_0         | 1035 | nicotinic acetylcholine receptor subunit alpha10                                                                                                                            | 803 | 1.22E-105 | 59.90% | 0.166 | IPR006201 (PRINTS); IPR027361 (G3DSA:1.20.120.GENE3D); IPR006029 (PFAM); IPR006202 (PFAM); IPR006202 (G3DSA:2.70.170.GENE3D); PTHR18945:SF490 (PANTHER); IPR006201 (PANTHER); NON_CYTOPLASMIC_DOMAIN (PHOBIUS); TRANSMEMBRANE (PHOBIUS); CYTOPLASMIC_DOMAIN (PHOBIUS); CYTOPLASMIC_DOMAIN (PHOBIUS); NON_CYTOPLASMIC_DOMAIN (PHOBIUS); TRANSMEMBRANE (PHOBIUS); NON_CYTOPLASMIC_DOMAIN (PHOBIUS); TRANSMEMBRANE (PHOBIUS); CYTOPLASMIC_DOMAIN (PHOBIUS); TRANSMEMBRANE (PHOBIUS); CYTOPLASMIC_DOMAIN (PHOBIUS); TRANSMEMBRANE (PHOBIUS); TRANSMEMBRANE (PHOBIUS); IPR006029 (SUPERFAMILY); IPR006202 (SUPERFAMILY); TMhelix (TMHMM); TMhelix (TMHMM)                 |
| 1812 | c39462_g1_i2_len_2406_path_2912_0_567_3_479_568_779_240_780_2062_4971_2063_2_079_4988_2080_2405_0       | 1038 | nicotinic acetylcholine receptor subunit alpha10                                                                                                                            | 802 | 1.08E-104 | 59.10% | 0.166 | IPR006201 (PRINTS); IPR027361 (G3DSA:1.20.120.GENE3D); IPR006202 (PFAM); IPR006029 (PFAM); IPR006202 (G3DSA:2.70.170.GENE3D); IPR006201 (PANTHER); PTHR18945:SF490 (PANTHER); TRANSMEMBRANE (PHOBIUS); NON_CYTOPLASMIC_DOMAIN (PHOBIUS); CYTOPLASMIC_DOMAIN (PHOBIUS); TRANSMEMBRANE (PHOBIUS); TRANSMEMBRANE (PHOBIUS); CYTOPLASMIC_DOMAIN (PHOBIUS); TRANSMEMBRANE (PHOBIUS); NON_CYTOPLASMIC_DOMAIN (PHOBIUS); TRANSMEMBRANE (PHOBIUS); CYTOPLASMIC_DOMAIN (PHOBIUS); TRANSMEMBRANE (PHOBIUS); CYTOPLASMIC_DOMAIN (PHOBIUS); TRANSMEMBRANE (PHOBIUS); TRANSMEMBRANE (PHOBIUS); IPR006029 (SUPERFAMILY); IPR006202 (SUPERFAMILY); TMhelix (TMHMM); TMhelix (TMHMM) |
| 1813 | c39468_g2_i1_len_1199_path_535_0_78_297_7_79_79_397_80_216_534_217_250_646_25_1_255_651_256_1171_3068_0 | 550  | low quality protein: galectin-4                                                                                                                                             | 400 | 1.78E-51  | 50.50% | 0.117 | IPR001079 (SMART); IPR001079 (PFAM); IPR013320 (G3DSA:2.60.120.GENE3D); IPR013320 (G3DSA:2.60.120.GENE3D); PTHR11346 (PANTHER); IPR001079 (PROSITE_PROFILES); IPR001079 (PROSITE_PROFILES); IPR013320 (SUPERFAMILY); IPR013320 (SUPERFAMILY)                                                                                                                                                                                                                                                                                                                                                                                                                                                                                                                                                |





|      |                                                                                                        |       |                                                  |      |           |        |       |                                                                                                                                                                                                                                                                                                                                                                                                                                                                                                                                                                                                                                                                                                                                                                                                                                                                                                           |
|------|--------------------------------------------------------------------------------------------------------|-------|--------------------------------------------------|------|-----------|--------|-------|-----------------------------------------------------------------------------------------------------------------------------------------------------------------------------------------------------------------------------------------------------------------------------------------------------------------------------------------------------------------------------------------------------------------------------------------------------------------------------------------------------------------------------------------------------------------------------------------------------------------------------------------------------------------------------------------------------------------------------------------------------------------------------------------------------------------------------------------------------------------------------------------------------------|
| 1822 | c39513_g1_i1_len_1743_path_2112_0_1017_193_1018_1160_336_1161_1742_0                                   | 147   | ves g 5 allergen                                 | 581  | 1.78E-42  | 49.30% | 0.239 | IPR001283 (PRINTS); IPR002413 (PRINTS); IPR014044 (SMART); IPR014044 (G3DSA:3.40.33.GENE3D); IPR014044 (PFAM); IPR001283 (PANTHER); IPR018244 (PROSITE_PATTERNS); NON_CYTOPLASMIC_DOMAIN (PHOBIUS); TRANSMEMBRANE (PHOBIUS); CYTOPLASMIC_DOMAIN (PHOBIUS); TRANSMEMBRANE (PHOBIUS); NON_CYTOPLASMIC_DOMAIN (PHOBIUS); TRANSMEMBRANE (PHOBIUS); CYTOPLASMIC_DOMAIN (PHOBIUS); IPR014044 (SUPERFAMILY); TMhelix (TMHMM); TMhelix (TMHMM); TMhelix (TMHMM)                                                                                                                                                                                                                                                                                                                                                                                                                                                   |
| 1823 | c39513_g1_i2_len_1600_path_2112_0_1017_336_1018_1599_0                                                 | 155   | ves g 5 allergen                                 | 534  | 3.02E-42  | 49.20% | 0.239 | IPR001283 (PRINTS); IPR002413 (PRINTS); IPR014044 (SMART); IPR014044 (PFAM); IPR014044 (G3DSA:3.40.33.GENE3D); IPR001283 (PANTHER); IPR018244 (PROSITE_PATTERNS); TRANSMEMBRANE (PHOBIUS); CYTOPLASMIC_DOMAIN (PHOBIUS); TRANSMEMBRANE (PHOBIUS); CYTOPLASMIC_DOMAIN (PHOBIUS); TRANSMEMBRANE (PHOBIUS); NON_CYTOPLASMIC_DOMAIN (PHOBIUS); NON_CYTOPLASMIC_DOMAIN (PHOBIUS); IPR014044 (SUPERFAMILY); TMhelix (TMHMM); TMhelix (TMHMM); TMhelix (TMHMM)                                                                                                                                                                                                                                                                                                                                                                                                                                                   |
| 1824 | c39521_g1_i1_len_2045_path_169_0_1821_1_991_1822_1823_1993_1824_1863_2032_1864_1866_147_1867_1896_20_5 | 12412 | vitelline membrane outer layer protein 1 homolog | 681  | 1.69E-38  | 55.10% | 0.158 | IPR000742 (SMART); IPR020864 (SMART); IPR020864 (PFAM); IPR005515 (PFAM); IPR005515 (G3DSA:2.100.10.GENE3D); IPR023413 (G3DSA:2.40.155.GENE3D); IPR005515 (PANTHER); IPR013032 (PROSITE_PATTERNS); IPR000152 (PROSITE_PATTERNS); IPR000742 (PROSITE_PROFILES); IPR020864 (PROSITE_PROFILES); IPR005515 (SUPERFAMILY); SSF57196 (SUPERFAMILY)                                                                                                                                                                                                                                                                                                                                                                                                                                                                                                                                                              |
| 1825 | c39534_g1_i1_len_5007_path_105_0_2155_1_0343_2156_5006_4                                               | 951   | calnexin                                         | 1669 | 0         | 73.50% | 0.185 | Coil (COILS); IPR001580 (PRINTS); IPR013320 (G3DSA:2.60.120.GENE3D); IPR001580 (PFAM); IPR009033 (G3DSA:2.10.250.GENE3D); PTHR11073:SF1 (PANTHER); IPR001580 (PANTHER); IPR018124 (PROSITE_PATTERNS); IPR018124 (PROSITE_PATTERNS); IPR018124 (PROSITE_PATTERNS); TRANSMEMBRANE (PHOBIUS); CYTOPLASMIC_DOMAIN (PHOBIUS); CYTOPLASMIC_DOMAIN (PHOBIUS); NON_CYTOPLASMIC_DOMAIN (PHOBIUS); CYTOPLASMIC_DOMAIN (PHOBIUS); TRANSMEMBRANE (PHOBIUS); TRANSMEMBRANE (PHOBIUS); NON_CYTOPLASMIC_DOMAIN (PHOBIUS); TRANSMEMBRANE (PHOBIUS); NON_CYTOPLASMIC_DOMAIN (PHOBIUS); NON_CYTOPLASMIC_DOMAIN (PHOBIUS); TRANSMEMBRANE (PHOBIUS); TRANSMEMBRANE (PHOBIUS); CYTOPLASMIC_DOMAIN (PHOBIUS); TRANSMEMBRANE (PHOBIUS); IPR013320 (SUPERFAMILY); IPR009033 (SUPERFAMILY); TMhelix (TMHMM); TMhelix (TMHMM) |
| 1826 | c39536_g2_i1_len_1105_path_2191_0_14_18_04_15_633_2823_634_658_2112_659_797_906_798_831_940_832_8_2    | 71    | alcohol dehydrogenase                            | 368  | 4.62E-111 | 67.70% | 0.205 | IPR020471 (PRINTS); IPR020471 (PIRSF); IPR023210 (G3DSA:3.20.20.GENE3D); IPR023210 (PFAM); IPR001395 (PANTHER); PTHR11732:SF183 (PANTHER); IPR018170 (PROSITE_PATTERNS); IPR018170 (PROSITE_PATTERNS); IPR023210 (SUPERFAMILY)                                                                                                                                                                                                                                                                                                                                                                                                                                                                                                                                                                                                                                                                            |
| 1827 | c39556_g2_i2_len_881_path_1209_0_47_125_7_48_49_1259_50_389_1599_390_603_181_3_604_880_4               | 1665  | apolipoprotein d-like                            | 294  | 6.60E-14  | 45.70% | 0.125 | IPR012674 (G3DSA:2.40.128.GENE3D); IPR000566 (PFAM); PTHR10612:SF10 (PANTHER); PTHR10612 (PANTHER); IPR011038 (SUPERFAMILY)                                                                                                                                                                                                                                                                                                                                                                                                                                                                                                                                                                                                                                                                                                                                                                               |
| 1828 | c39559_g3_i1_len_3216_path_5941_0_8_597_3_9_56_17915_57_61_17920_62_77_6042_7_8_3215_0                 | 3290  | sarcalumenin isoform x2                          | 1072 | 0         | 81.30% | 0.104 | IPR027417 (G3DSA:3.40.50.GENE3D); IPR006073 (PFAM); PTHR11216:SF66 (PANTHER); PTHR11216 (PANTHER); NON_CYTOPLASMIC_DOMAIN (PHOBIUS); TRANSMEMBRANE (PHOBIUS); NON_CYTOPLASMIC_DOMAIN (PHOBIUS); CYTOPLASMIC_DOMAIN (PHOBIUS); TRANSMEMBRANE (PHOBIUS); IPR030381 (PROSITE_PROFILES); IPR027417 (SUPERFAMILY); TMhelix (TMHMM)                                                                                                                                                                                                                                                                                                                                                                                                                                                                                                                                                                             |
| 1829 | c39564_g1_i1_len_1962_path_1_0_207_209_208_208_210_209_1961_4                                          | 47087 | probable chitinase 3-like                        | 654  | 1.89E-169 | 64.30% | 0.289 | IPR011583 (SMART); IPR002557 (SMART); IPR029070 (G3DSA:3.10.50.GENE3D); IPR001223 (PFAM); IPR013781 (G3DSA:3.20.20.GENE3D); IPR002557 (G3DSA:2.170.140.GENE3D); IPR002557 (PFAM); PTHR11177:SF112 (PANTHER); PTHR11177 (PANTHER); TRANSMEMBRANE (PHOBIUS); NON_CYTOPLASMIC_DOMAIN (PHOBIUS); CYTOPLASMIC_DOMAIN (PHOBIUS); IPR002557 (PROSITE_PROFILES); IPR029070 (SUPERFAMILY); IPR002557 (SUPERFAMILY); IPR017853 (SUPERFAMILY)                                                                                                                                                                                                                                                                                                                                                                                                                                                                        |

|      |                                                                                                         |      |                                     |      |           |        |       |                                                                                                                                                                                                                                                                                                                                                                                                                                                                                                                                                                                                                                                                                                                                                                                                                                                                                                                                                                                            |
|------|---------------------------------------------------------------------------------------------------------|------|-------------------------------------|------|-----------|--------|-------|--------------------------------------------------------------------------------------------------------------------------------------------------------------------------------------------------------------------------------------------------------------------------------------------------------------------------------------------------------------------------------------------------------------------------------------------------------------------------------------------------------------------------------------------------------------------------------------------------------------------------------------------------------------------------------------------------------------------------------------------------------------------------------------------------------------------------------------------------------------------------------------------------------------------------------------------------------------------------------------------|
| 1830 | c39578_g1_i1_len_2747_path_1_0_222_224_223_959_961_960_969_971_970_2746_5                               | 1476 | heat shock 70 kda protein cognate 5 | 915  | 0         | 89.00% | 0.164 | Coil (COILS); IPR013126 (PRINTS); G3DSA:3.30.420.40 (GENE3D); IPR029047 (G3DSA:2.60.34.GENE3D); IPR029048 (G3DSA:1.20.1270.GENE3D); G3DSA:3.90.640.10 (GENE3D); IPR013126 (PFAM); G3DSA:3.30.420.40 (GENE3D); IPR012725 (TIGRFAM); G3DSA:3.30.30.30 (GENE3D); PTHR19375 (PANTHER); PTHR19375:SF173 (PANTHER); IPR018181 (PROSITE_PATTERNS); IPR018181 (PROSITE_PATTERNS); IPR012725 (HAMAP); IPR029047 (SUPERFAMILY); SSF53067 (SUPERFAMILY); SSF53067 (SUPERFAMILY)                                                                                                                                                                                                                                                                                                                                                                                                                                                                                                                       |
| 1831 | c39582_g1_i1_len_815_path_927_0_178_110_6_179_181_1109_182_563_1491_564_621_1_548_622_633_101_634_673_0 | 86   | protein creg1                       | 272  | 2.65E-72  | 75.70% | 0.17  | IPR012349 (G3DSA:2.30.110.GENE3D); PF13883 (PFAM); PTHR13343 (PANTHER); PTHR13343:SF12 (PANTHER); IPR012349 (SUPERFAMILY)                                                                                                                                                                                                                                                                                                                                                                                                                                                                                                                                                                                                                                                                                                                                                                                                                                                                  |
| 1832 | c39587_g1_i1_len_2512_path_3216_0_231_3_447_232_434_713_435_1047_198_1048_20_09_5217_2010_2029_688_0    | 1037 | glucose dehydrogenase               | 838  | 0         | 65.90% | 0.135 | IPR000172 (PFAM); G3DSA:3.50.50.60 (GENE3D); IPR007867 (PFAM); PTHR11552 (PANTHER); PTHR11552:SF77 (PANTHER); IPR000172 (PROSITE_PATTERNS); IPR000172 (PROSITE_PATTERNS); TRANSMEMBRANE (PHOBIUS); TRANSMEMBRANE (PHOBIUS); NON_CYTOPLASMIC_DOMAIN (PHOBIUS); CYTOPLASMIC_DOMAIN (PHOBIUS); NON_CYTOPLASMIC_DOMAIN (PHOBIUS); SSF51905 (SUPERFAMILY); SSF54373 (SUPERFAMILY); TMhelix (TMHMM)                                                                                                                                                                                                                                                                                                                                                                                                                                                                                                                                                                                              |
| 1833 | c39587_g1_i2_len_1543_path_119_0_78_198_79_1040_5217_1041_1060_688_1061_154_2_0                         | 584  | glucose dehydrogenase               | 515  | 3.52E-78  | 63.50% | 0.192 | IPR007867 (PFAM); G3DSA:3.30.560.10 (GENE3D); PTHR11552 (PANTHER); PTHR11552:SF77 (PANTHER); SSF51905 (SUPERFAMILY); SSF54373 (SUPERFAMILY)                                                                                                                                                                                                                                                                                                                                                                                                                                                                                                                                                                                                                                                                                                                                                                                                                                                |
| 1834 | c39587_g1_i3_len_2309_path_3216_0_231_7_13_232_844_198_845_1806_5217_1807_18_26_688_1827_2308_1         | 915  | glucose dehydrogenase               | 770  | 7.87E-161 | 65.80% | 0.289 | G3DSA:3.50.50.60 (GENE3D); IPR007867 (PFAM); IPR000172 (PFAM); PTHR11552:SF77 (PANTHER); PTHR11552 (PANTHER); IPR000172 (PROSITE_PATTERNS); IPR000172 (PROSITE_PATTERNS); SSF54373 (SUPERFAMILY); SSF51905 (SUPERFAMILY)                                                                                                                                                                                                                                                                                                                                                                                                                                                                                                                                                                                                                                                                                                                                                                   |
| 1835 | c39596_g1_i1_len_2347_path_2582_0_2167_4955_2168_2346_5                                                 | 441  | serine protease                     | 782  | 1.61E-27  | 64.10% | 0.287 | IPR001254 (SMART); IPR001254 (PFAM); G3DSA:2.40.10.10 (GENE3D); PTHR24256 (PANTHER); IPR001254 (PROSITE_PROFILES); IPR009003 (SUPERFAMILY)                                                                                                                                                                                                                                                                                                                                                                                                                                                                                                                                                                                                                                                                                                                                                                                                                                                 |
| 1836 | c39596_g1_i2_len_2554_path_2582_0_2167_4748_2168_2374_4955_2375_2553_5                                  | 596  | anionic trypsin-like                | 851  | 8.85E-40  | 53.30% | 0.298 | IPR001314 (PRINTS); IPR001254 (SMART); G3DSA:2.40.10.10 (GENE3D); IPR001254 (PFAM); G3DSA:2.40.10.10 (GENE3D); PTHR24256 (PANTHER); IPR001254 (PROSITE_PROFILES); IPR009003 (SUPERFAMILY)                                                                                                                                                                                                                                                                                                                                                                                                                                                                                                                                                                                                                                                                                                                                                                                                  |
| 1837 | c39624_g1_i1_len_5386_path_1721_0_1593_1672_1594_1683_3404_1684_1704_3425_1_705_2119_3840_2120_21_5     | 546  | laminin subunit alpha               | 1795 | 0         | 57.00% | 0.111 | Coil (COILS); Coil (COILS); Coil (COILS); IPR001791 (SMART); IPR013320 (G3DSA:2.60.120.GENE3D); IPR001791 (PFAM); IPR013320 (G3DSA:2.60.120.GENE3D); IPR010307 (PFAM); IPR013320 (G3DSA:2.60.120.GENE3D); IPR013320 (G3DSA:2.60.120.GENE3D); IPR009254 (PFAM); PTHR10574:SF39 (PANTHER); PTHR10574 (PANTHER); CYTOPLASMIC_DOMAIN (PHOBIUS); NON_CYTOPLASMIC_DOMAIN (PHOBIUS); TRANSMEMBRANE (PHOBIUS); CYTOPLASMIC_DOMAIN (PHOBIUS); TRANSMEMBRANE (PHOBIUS); TRANSMEMBRANE (PHOBIUS); CYTOPLASMIC_DOMAIN (PHOBIUS); NON_CYTOPLASMIC_DOMAIN (PHOBIUS); TRANSMEMBRANE (PHOBIUS); NON_CYTOPLASMIC_DOMAIN (PHOBIUS); TRANSMEMBRANE (PHOBIUS); PD936484 (PRODOM); IPR001791 (PROSITE_PROFILES); IPR001791 (PROSITE_PROFILES); IPR001791 (PROSITE_PROFILES); IPR001791 (PROSITE_PROFILES); IPR001791 (PROSITE_PROFILES); IPR013320 (SUPERFAMILY); IPR013320 (SUPERFAMILY); IPR013320 (SUPERFAMILY); IPR013320 (SUPERFAMILY); TMhelix (TMHMM); TMhelix (TMHMM); TMhelix (TMHMM); TMhelix (TMHMM) |
| 1838 | c39624_g1_i2_len_4627_path_837_0_834_16_72_835_924_12646_925_945_3425_946_13_60_3840_1361_1383_386_5    | 389  | laminin subunit alpha               | 1542 | 0         | 57.00% | 0.111 | Coil (COILS); Coil (COILS); Coil (COILS); IPR001791 (SMART); IPR013320 (G3DSA:2.60.120.GENE3D); IPR010307 (PFAM); IPR013320 (G3DSA:2.60.120.GENE3D); IPR009254 (PFAM); IPR013320 (G3DSA:2.60.120.GENE3D); IPR013320 (G3DSA:2.60.120.GENE3D); IPR013320 (G3DSA:2.60.120.GENE3D); IPR001791 (PFAM); PTHR10574:SF39 (PANTHER); PTHR10574 (PANTHER); PD936484 (PRODOM); IPR001791 (PROSITE_PROFILES); IPR001791 (PROSITE_PROFILES); IPR001791 (PROSITE_PROFILES); IPR001791 (PROSITE_PROFILES); IPR001791 (PROSITE_PROFILES); IPR013320 (SUPERFAMILY); IPR013320 (SUPERFAMILY); IPR013320 (SUPERFAMILY); IPR013320 (SUPERFAMILY)                                                                                                                                                                                                                                                                                                                                                               |

|      |                                                                                                     |      |                                                 |      |          |        |         |                                                                                                                                                                                                                                                                                                                                                                                                                                                                                                                                                                                                                                                                                                                                                              |
|------|-----------------------------------------------------------------------------------------------------|------|-------------------------------------------------|------|----------|--------|---------|--------------------------------------------------------------------------------------------------------------------------------------------------------------------------------------------------------------------------------------------------------------------------------------------------------------------------------------------------------------------------------------------------------------------------------------------------------------------------------------------------------------------------------------------------------------------------------------------------------------------------------------------------------------------------------------------------------------------------------------------------------------|
| 1839 | c39626_g1_i1_len_1482_path_1963_0_977_1_68_978_1481_4                                               | 261  | low affinity immunoglobulin epsilon fc receptor | 494  | 6.69E-17 | 51.00% | 0.891 Y | IPR001304 (SMART); IPR001304 (PFAM); IPR016186 (G3DSA:3.10.100.GENE3D); PTHR22803 (PANTHER); SIGNAL_PEPTIDE_H_REGION (PHOBIUS); SIGNAL_PEPTIDE (PHOBIUS); SIGNAL_PEPTIDE_N_REGION (PHOBIUS); SIGNAL_PEPTIDE_C_REGION (PHOBIUS); NON_CYTOPLASMIC_DOMAIN (PHOBIUS); IPR001304 (PROSITE_PROFILES); SignalP-noTM (SIGNALP_EUK); IPR016187 (SUPERFAMILY)                                                                                                                                                                                                                                                                                                                                                                                                          |
| 1840 | c39626_g1_i2_len_567_path_105_0_62_168_63_566_4                                                     | 15   | low affinity immunoglobulin epsilon fc receptor | 189  | 6.27E-18 | 50.70% | 0.891 Y | IPR001304 (SMART); IPR001304 (PFAM); IPR016186 (G3DSA:3.10.100.GENE3D); PTHR22803 (PANTHER); NON_CYTOPLASMIC_DOMAIN (PHOBIUS); SIGNAL_PEPTIDE (PHOBIUS); SIGNAL_PEPTIDE_N_REGION (PHOBIUS); SIGNAL_PEPTIDE_H_REGION (PHOBIUS); SIGNAL_PEPTIDE_C_REGION (PHOBIUS); IPR001304 (PROSITE_PROFILES); SignalP-noTM (SIGNALP_EUK); IPR016187 (SUPERFAMILY)                                                                                                                                                                                                                                                                                                                                                                                                          |
| 1841 | c39626_g1_i3_len_567_path_285_0_62_168_63_566_4                                                     | 19   | low affinity immunoglobulin epsilon fc receptor | 189  | 6.08E-18 | 50.70% | 0.891 Y | IPR001304 (SMART); IPR016186 (G3DSA:3.10.100.GENE3D); IPR001304 (PFAM); PTHR22803 (PANTHER); SIGNAL_PEPTIDE_N_REGION (PHOBIUS); SIGNAL_PEPTIDE_H_REGION (PHOBIUS); SIGNAL_PEPTIDE (PHOBIUS); SIGNAL_PEPTIDE_C_REGION (PHOBIUS); NON_CYTOPLASMIC_DOMAIN (PHOBIUS); IPR001304 (PROSITE_PROFILES); SignalP-noTM (SIGNALP_EUK); IPR016187 (SUPERFAMILY)                                                                                                                                                                                                                                                                                                                                                                                                          |
| 1842 | c39642_g1_i2_len_1093_path_1303_0_154_2_572_155_175_144_176_591_1888_592_664_166_665_667_1963_668_3 | 285  | protein spaetzle                                | 365  | 6.31E-28 | 51.90% | 0.152   | PTHR23199 (PANTHER); NON_CYTOPLASMIC_DOMAIN (PHOBIUS); CYTOPLASMIC_DOMAIN (PHOBIUS); TRANSMEMBRANE (PHOBIUS); NON_CYTOPLASMIC_DOMAIN (PHOBIUS); TRANSMEMBRANE (PHOBIUS); IPR029034 (SUPERFAMILY); TMhelix (TMHMM); TMhelix (TMHMM)                                                                                                                                                                                                                                                                                                                                                                                                                                                                                                                           |
| 1843 | c39642_g1_i3_len_1020_path_1303_0_154_2_572_155_175_144_176_591_166_592_594_1963_595_1019_5         | 223  | protein spaetzle                                | 340  | 3.18E-22 | 56.60% | 0.109   | PTHR23199 (PANTHER); CYTOPLASMIC_DOMAIN (PHOBIUS); TRANSMEMBRANE (PHOBIUS); NON_CYTOPLASMIC_DOMAIN (PHOBIUS); IPR029034 (SUPERFAMILY); TMhelix (TMHMM)                                                                                                                                                                                                                                                                                                                                                                                                                                                                                                                                                                                                       |
| 1844 | c39648_g1_i1_len_1398_path_387_0_267_65_4_268_311_317_312_361_746_362_382_202_383_1397_2            | 8621 | venom allergen 3-like                           | 466  | 3.47E-44 | 52.20% | 0.326   | IPR002413 (PRINTS); IPR001283 (PRINTS); IPR014044 (SMART); IPR014044 (G3DSA:3.40.33.GENE3D); IPR014044 (PFAM); IPR001283 (PANTHER); IPR018244 (PROSITE_PATTERNS); TRANSMEMBRANE (PHOBIUS); NON_CYTOPLASMIC_DOMAIN (PHOBIUS); CYTOPLASMIC_DOMAIN (PHOBIUS); TRANSMEMBRANE (PHOBIUS); NON_CYTOPLASMIC_DOMAIN (PHOBIUS); IPR014044 (SUPERFAMILY); TMhelix (TMHMM); TMhelix (TMHMM); TMhelix (TMHMM)                                                                                                                                                                                                                                                                                                                                                             |
| 1845 | c39660_g1_i1_len_4786_path_5148_0_107_5_256_108_4745_12176_4746_4755_12220_4_756_4785_0             | 788  | dystroglycan isoform x1                         | 1596 | 0        | 61.20% | 0.492 Y | IPR006644 (SMART); IPR027468 (G3DSA:3.30.70.GENE3D); IPR008465 (PFAM); IPR008009 (PFAM); IPR013783 (G3DSA:2.60.40.GENE3D); PTHR21559:SF16 (PANTHER); PTHR21559 (PANTHER); TRANSMEMBRANE (PHOBIUS); TRANSMEMBRANE (PHOBIUS); NON_CYTOPLASMIC_DOMAIN (PHOBIUS); NON_CYTOPLASMIC_DOMAIN (PHOBIUS); CYTOPLASMIC_DOMAIN (PHOBIUS); TRANSMEMBRANE (PHOBIUS); CYTOPLASMIC_DOMAIN (PHOBIUS); CYTOPLASMIC_DOMAIN (PHOBIUS); TRANSMEMBRANE (PHOBIUS); TRANSMEMBRANE (PHOBIUS); IPR030398 (PROSITE_PROFILES); IPR030398 (PROSITE_PROFILES); SignalP-noTM (SIGNALP_EUK); IPR027468 (SUPERFAMILY); IPR015919 (SUPERFAMILY); IPR015919 (SUPERFAMILY); IPR015919 (SUPERFAMILY); IPR015919 (SUPERFAMILY); TMhelix (TMHMM); TMhelix (TMHMM); TMhelix (TMHMM); TMhelix (TMHMM) |
| 1846 | c39660_g1_i2_len_5591_path_10855_0_496_12187_497_912_5256_913_5550_12176_55_51_5560_12220_5561_55_1 | 889  | dystroglycan isoform x1                         | 1864 | 0        | 61.30% | 0.13    | IPR006644 (SMART); IPR008009 (PFAM); IPR013783 (G3DSA:2.60.40.GENE3D); IPR008465 (PFAM); IPR027468 (G3DSA:3.30.70.GENE3D); PTHR21559 (PANTHER); PTHR21559:SF16 (PANTHER); CYTOPLASMIC_DOMAIN (PHOBIUS); NON_CYTOPLASMIC_DOMAIN (PHOBIUS); NON_CYTOPLASMIC_DOMAIN (PHOBIUS); CYTOPLASMIC_DOMAIN (PHOBIUS); TRANSMEMBRANE (PHOBIUS); TRANSMEMBRANE (PHOBIUS); CYTOPLASMIC_DOMAIN (PHOBIUS); TRANSMEMBRANE (PHOBIUS); NON_CYTOPLASMIC_DOMAIN (PHOBIUS); IPR030398 (PROSITE_PROFILES); IPR030398 (PROSITE_PROFILES); IPR015919 (SUPERFAMILY); IPR015919 (SUPERFAMILY); IPR015919 (SUPERFAMILY); IPR015919 (SUPERFAMILY); IPR027468 (SUPERFAMILY); TMhelix (TMHMM); TMhelix (TMHMM); TMhelix (TMHMM); TMhelix (TMHMM)                                             |
| 1847 | c39662_g1_i1_len_829_path_1147_0_290_20_11_291_311_46_312_828_3                                     | 492  | hemagglutinin amebocyte aggregation factor-like | 277  | 7.65E-10 | 74.10% | 0.115   | PF14704 (PFAM); IPR026645 (PANTHER); NON_CYTOPLASMIC_DOMAIN (PHOBIUS); CYTOPLASMIC_DOMAIN (PHOBIUS); TRANSMEMBRANE (PHOBIUS)                                                                                                                                                                                                                                                                                                                                                                                                                                                                                                                                                                                                                                 |

[illegible]



|      |                                                                                                        |      |                                                                                   |      |          |        |       |                                                                                                                                                                                                                                                                                                                                                                                                                                                                                                                                                                                                                                                                                      |
|------|--------------------------------------------------------------------------------------------------------|------|-----------------------------------------------------------------------------------|------|----------|--------|-------|--------------------------------------------------------------------------------------------------------------------------------------------------------------------------------------------------------------------------------------------------------------------------------------------------------------------------------------------------------------------------------------------------------------------------------------------------------------------------------------------------------------------------------------------------------------------------------------------------------------------------------------------------------------------------------------|
| 1855 | c39736_g1_i1_len_2724_path_2702_0_2723_0                                                               | 2103 | tissue factor pathway inhibitor 2                                                 | 908  | 4.20E-33 | 62.80% | 0.124 | Coil (COILS); IPR002223 (PRINTS); IPR002223 (SMART); IPR002223 (G3DSA:4.10.410.GENE3D); IPR002223 (G3DSA:4.10.410.GENE3D); IPR002223 (PFAM); PTHR10083 (PANTHER); IPR020901 (PROSITE_PATTERNS); IPR020901 (PROSITE_PATTERNS); CYTOPLASMIC_DOMAIN (PHOBIUS); TRANSMEMBRANE (PHOBIUS); TRANSMEMBRANE (PHOBIUS); NON_CYTOPLASMIC_DOMAIN (PHOBIUS); CYTOPLASMIC_DOMAIN (PHOBIUS); TRANSMEMBRANE (PHOBIUS); NON_CYTOPLASMIC_DOMAIN (PHOBIUS); TRANSMEMBRANE (PHOBIUS); NON_CYTOPLASMIC_DOMAIN (PHOBIUS); IPR002223 (PROSITE_PROFILES); IPR002223 (PROSITE_PROFILES); IPR002223 (SUPERFAMILY); IPR002223 (SUPERFAMILY); TMhelix (TMHMM); TMhelix (TMHMM); TMhelix (TMHMM); TMhelix (TMHMM) |
| 1857 | c39750_g1_i1_len_6586_path_8171_0_366_1_82_367_6585_3                                                  | 1460 | cyclin-dependent kinase 12 isoform x1                                             | 2196 | 0        | 76.80% | 0.133 | Coil (COILS); IPR002290 (SMART); G3DSA:3.30.200.20 (GENE3D); IPR000719 (PFAM); G3DSA:1.10.510.10 (GENE3D); PTHR24056 (PANTHER); PTHR24056:SF125 (PANTHER); IPR017441 (PROSITE_PATTERNS); IPR008271 (PROSITE_PATTERNS); IPR000719 (PROSITE_PROFILES); IPR011009 (SUPERFAMILY)                                                                                                                                                                                                                                                                                                                                                                                                         |
| 1858 | c39750_g1_i2_len_6348_path_53_0_128_182_129_6347_3                                                     | 1424 | cyclin-dependent kinase 12 isoform x1                                             | 2116 | 0        | 76.90% | 0.133 | Coil (COILS); IPR002290 (SMART); G3DSA:3.30.200.20 (GENE3D); G3DSA:1.10.510.10 (GENE3D); IPR000719 (PFAM); PTHR24056:SF125 (PANTHER); PTHR24056 (PANTHER); IPR008271 (PROSITE_PATTERNS); IPR017441 (PROSITE_PATTERNS); IPR000719 (PROSITE_PROFILES); IPR011009 (SUPERFAMILY)                                                                                                                                                                                                                                                                                                                                                                                                         |
| 1859 | c39753_g1_i2_len_1034_path_1555_0_186_2_20_187_289_1843_290_309_371_310_764_4_59_765_836_29_837_1033_2 | 115  | protein them6                                                                     | 344  | 6.25E-32 | 55.60% | 0.101 | PF13279 (PFAM); IPR029069 (G3DSA:3.10.129.GENE3D); PTHR12475 (PANTHER); NON_CYTOPLASMIC_DOMAIN (PHOBIUS); TRANSMEMBRANE (PHOBIUS); CYTOPLASMIC_DOMAIN (PHOBIUS); TRANSMEMBRANE (PHOBIUS); TRANSMEMBRANE (PHOBIUS); CYTOPLASMIC_DOMAIN (PHOBIUS); IPR029069 (SUPERFAMILY); TMhelix (TMHMM)                                                                                                                                                                                                                                                                                                                                                                                            |
| 1860 | c39769_g1_i1_len_3123_path_261_0_2365_6_771_2366_2389_2641_2390_3122_2                                 | 793  | gels_homam ame: full= cytoplasmic ame: full=actin-depolymerizing factor short=adf | 1041 | 0        | 73.50% | 0.138 | Coil (COILS); IPR007122 (PRINTS); IPR007122 (SMART); IPR029006 (G3DSA:3.40.20.GENE3D); IPR029006 (G3DSA:3.40.20.GENE3D); IPR029006 (G3DSA:3.40.20.GENE3D); IPR007123 (PFAM); IPR007122 (PANTHER); TRANSMEMBRANE (PHOBIUS); CYTOPLASMIC_DOMAIN (PHOBIUS); NON_CYTOPLASMIC_DOMAIN (PHOBIUS); SSF55753 (SUPERFAMILY); SSF55753 (SUPERFAMILY); SSF55753 (SUPERFAMILY); SSF55753 (SUPERFAMILY); TMhelix (TMHMM); TMhelix (TMHMM)                                                                                                                                                                                                                                                          |
| 1861 | c39769_g1_i2_len_3179_path_261_0_2365_6_771_2366_2389_6591_2390_2445_2641_244_6_3178_2                 | 799  | gels_homam ame: full= cytoplasmic ame: full=actin-depolymerizing factor short=adf | 1059 | 0        | 73.50% | 0.138 | IPR007122 (PRINTS); IPR007122 (SMART); IPR029006 (G3DSA:3.40.20.GENE3D); IPR029006 (G3DSA:3.40.20.GENE3D); IPR007123 (PFAM); IPR029006 (G3DSA:3.40.20.GENE3D); IPR007122 (PANTHER); TRANSMEMBRANE (PHOBIUS); TRANSMEMBRANE (PHOBIUS); NON_CYTOPLASMIC_DOMAIN (PHOBIUS); CYTOPLASMIC_DOMAIN (PHOBIUS); NON_CYTOPLASMIC_DOMAIN (PHOBIUS); SSF55753 (SUPERFAMILY); SSF55753 (SUPERFAMILY); SSF55753 (SUPERFAMILY); SSF55753 (SUPERFAMILY); TMhelix (TMHMM); TMhelix (TMHMM)                                                                                                                                                                                                             |
| 1862 | c39786_g1_i1_len_276_path_647_0_2_650_3_45_914_46_51_5953_52_60_3557_61_89_4_822_90_243_6164_244_262_4 | 285  | ---NA---                                                                          | 92   |          |        | 0.321 | TMhelix (TMHMM)                                                                                                                                                                                                                                                                                                                                                                                                                                                                                                                                                                                                                                                                      |
| 1863 | c39786_g3_i2_len_338_path_703_0_167_871_168_210_914_211_216_5953_217_225_355_7_226_254_3586_255_260_3  | 16   | muc19_human ame: full=mucin-19 short=muc-19 flags: partial                        | 113  | 8.77E-06 | 47.00% | 0.153 | TMhelix (TMHMM); TMhelix (TMHMM)                                                                                                                                                                                                                                                                                                                                                                                                                                                                                                                                                                                                                                                     |
| 1864 | c39786_g3_i4_len_720_path_703_0_167_871_168_210_914_211_216_5953_217_225_355_7_226_254_3586_255_260_4  | 595  | low quality protein: mucin-19                                                     | 240  | 5.45E-14 | 44.90% | 0.207 | SSF141571 (SUPERFAMILY); TMhelix (TMHMM); TMhelix (TMHMM); TMhelix (TMHMM); TMhelix (TMHMM); TMhelix (TMHMM); TMhelix (TMHMM)                                                                                                                                                                                                                                                                                                                                                                                                                                                                                                                                                        |

|      |                                                                                                       |      |                                             |      |           |        |        |                                                                                                                                                                                                                                                                                                                                                                                                                                                                                                                                                                                                |
|------|-------------------------------------------------------------------------------------------------------|------|---------------------------------------------|------|-----------|--------|--------|------------------------------------------------------------------------------------------------------------------------------------------------------------------------------------------------------------------------------------------------------------------------------------------------------------------------------------------------------------------------------------------------------------------------------------------------------------------------------------------------------------------------------------------------------------------------------------------------|
| 1865 | c39792_g1_i1_len_3494_path_3522_0_1030_4553_1031_2054_5575_2055_2072_5593_2073_3493_2                 | 3283 | beta-hexosaminidase subunit beta isoform x1 | 1164 | 0         | 69.80% | 0.360Y | IPR025705 (PRINTS); IPR029019 (PFAM); IPR013781 (G3DSA:3.20.20.GENE3D); IPR015883 (PFAM); IPR029018 (G3DSA:3.30.379.GENE3D); PTHR22600 (PANTHER); PTHR22600:SF7 (PANTHER); TRANSMEMBRANE (PHOBIUS); CYTOPLASMIC_DOMAIN (PHOBIUS); CYTOPLASMIC_DOMAIN (PHOBIUS); TRANSMEMBRANE (PHOBIUS); NON_CYTOPLASMIC_DOMAIN (PHOBIUS); TRANSMEMBRANE (PHOBIUS); NON_CYTOPLASMIC_DOMAIN (PHOBIUS); TRANSMEMBRANE (PHOBIUS); NON_CYTOPLASMIC_DOMAIN (PHOBIUS); IPR029018 (SUPERFAMILY); IPR017853 (SUPERFAMILY); TMhelix (TMHMM)                                                                             |
| 1866 | c39806_g1_i1_len_1804_path_2097_0_181_2299_182_373_253_374_374_254_375_1803_3                         | 1273 | superoxide dismutase                        | 595  | 2.30E-79  | 84.90% | 0.165  | IPR001424 (PRINTS); IPR001424 (G3DSA:2.60.40.GENE3D); IPR001424 (PFAM); PTHR10003:SF33 (PANTHER); PTHR10003 (PANTHER); IPR018152 (PROSITE_PATTERNS); IPR018152 (PROSITE_PATTERNS); CYTOPLASMIC_DOMAIN (PHOBIUS); TRANSMEMBRANE (PHOBIUS); NON_CYTOPLASMIC_DOMAIN (PHOBIUS); IPR001424 (SUPERFAMILY)                                                                                                                                                                                                                                                                                            |
| 1867 | c39806_g1_i2_len_1825_path_2097_0_181_2277_182_203_2299_204_395_254_396_1824_3                        | 1377 | superoxide dismutase                        | 602  | 2.71E-79  | 84.90% | 0.165  | IPR001424 (PRINTS); IPR001424 (PFAM); IPR001424 (G3DSA:2.60.40.GENE3D); PTHR10003:SF33 (PANTHER); PTHR10003 (PANTHER); IPR018152 (PROSITE_PATTERNS); IPR018152 (PROSITE_PATTERNS); TRANSMEMBRANE (PHOBIUS); CYTOPLASMIC_DOMAIN (PHOBIUS); CYTOPLASMIC_DOMAIN (PHOBIUS); NON_CYTOPLASMIC_DOMAIN (PHOBIUS); TRANSMEMBRANE (PHOBIUS); IPR001424 (SUPERFAMILY)                                                                                                                                                                                                                                     |
| 1868 | c39828_g1_i1_len_4563_path_3827_0_4562_4                                                              | 4393 | low quality protein: hemocytin-like         | 1521 | 0         | 54.00% | 0.106  | IPR001846 (SMART); IPR006207 (SMART); IPR014853 (SMART); IPR001007 (SMART); IPR002919 (PFAM); G3DSA:2.10.25.10 (GENE3D); IPR001846 (PFAM); IPR014853 (PFAM); PTHR11339:SF25 (PANTHER); PTHR11339 (PANTHER); IPR001007 (PROSITE_PATTERNS); TRANSMEMBRANE (PHOBIUS); CYTOPLASMIC_DOMAIN (PHOBIUS); NON_CYTOPLASMIC_DOMAIN (PHOBIUS); TRANSMEMBRANE (PHOBIUS); NON_CYTOPLASMIC_DOMAIN (PHOBIUS); IPR006207 (PROSITE_PROFILES); IPR001846 (PROSITE_PROFILES); IPR001007 (PROSITE_PROFILES); IPR001846 (PROSITE_PROFILES); IPR002919 (SUPERFAMILY); IPR002919 (SUPERFAMILY); SSF57603 (SUPERFAMILY) |
| 1869 | c39828_g2_i1_len_1083_path_2368_0_26_2395_27_120_2489_121_144_2513_145_216_2585_217_251_13207_252_3_3 | 118  | low quality protein: hemocytin-like         | 361  | 2.82E-62  | 59.30% | 0.106  | IPR000421 (SMART); IPR000421 (PFAM); IPR008979 (G3DSA:2.60.120.GENE3D); IPR002172 (G3DSA:4.10.400.GENE3D); PTHR24543 (PANTHER); IPR000421 (PROSITE_PATTERNS); IPR000421 (PROSITE_PATTERNS); IPR000421 (PROSITE_PROFILES); IPR002172 (SUPERFAMILY); IPR008979 (SUPERFAMILY)                                                                                                                                                                                                                                                                                                                     |
| 1870 | c39828_g2_i2_len_1702_path_1752_0_615_2368_616_642_13573_643_736_2489_737_760_13690_761_835_2585_83_3 | 527  | low quality protein: hemocytin-like         | 568  | 2.57E-102 | 55.80% | 0.106  | IPR002172 (SMART); IPR000421 (SMART); IPR008979 (G3DSA:2.60.120.GENE3D); IPR000421 (PFAM); IPR002172 (G3DSA:4.10.400.GENE3D); PTHR24543 (PANTHER); IPR000421 (PROSITE_PATTERNS); IPR000421 (PROSITE_PATTERNS); IPR000421 (PROSITE_PROFILES); IPR002172 (SUPERFAMILY); IPR002172 (SUPERFAMILY); IPR008979 (SUPERFAMILY)                                                                                                                                                                                                                                                                         |
| 1871 | c39831_g1_i1_len_3132_path_3260_0_1277_4536_1278_3131_4                                               | 248  | protein canopy 4                            | 1044 | 3.04E-83  | 79.60% | 0.179  | IPR021852 (PFAM); PTHR15382 (PANTHER); TRANSMEMBRANE (PHOBIUS); TRANSMEMBRANE (PHOBIUS); TRANSMEMBRANE (PHOBIUS); CYTOPLASMIC_DOMAIN (PHOBIUS); TRANSMEMBRANE (PHOBIUS); TRANSMEMBRANE (PHOBIUS); TRANSMEMBRANE (PHOBIUS); CYTOPLASMIC_DOMAIN (PHOBIUS); NON_CYTOPLASMIC_DOMAIN (PHOBIUS); NON_CYTOPLASMIC_DOMAIN (PHOBIUS); NON_CYTOPLASMIC_DOMAIN (PHOBIUS); CYTOPLASMIC_DOMAIN (PHOBIUS); NON_CYTOPLASMIC_DOMAIN (PHOBIUS); TRANSMEMBRANE (PHOBIUS); CYTOPLASMIC_DOMAIN (PHOBIUS); TMhelix (TMHMM)                                                                                          |
| 1872 | c39845_g1_i1_len_2103_path_53_0_46_140_47_2102_5                                                      | 243  | maltase 2-like                              | 701  | 0         | 65.60% | 0.19   | IPR006589 (SMART); IPR013781 (G3DSA:3.20.20.GENE3D); IPR006047 (PFAM); G3DSA:3.90.400.10 (GENE3D); PTHR10357:SF76 (PANTHER); IPR015902 (PANTHER); IPR017853 (SUPERFAMILY)                                                                                                                                                                                                                                                                                                                                                                                                                      |
| 1873 | c39845_g1_i2_len_2143_path_53_0_46_100_47_86_140_87_2142_5                                            | 263  | maltase 2-like                              | 714  | 0         | 65.60% | 0.19   | IPR006589 (SMART); G3DSA:3.90.400.10 (GENE3D); IPR006047 (PFAM); IPR013781 (G3DSA:3.20.20.GENE3D); PTHR10357:SF76 (PANTHER); IPR015902 (PANTHER); IPR017853 (SUPERFAMILY)                                                                                                                                                                                                                                                                                                                                                                                                                      |
| 1874 | c39867_g1_i1_len_6456_path_209_0_6455_0                                                               | 1532 | titin- partial                              | 2152 | 5.65E-25  | 59.80% | 0.098  | IPR003599 (SMART); IPR003598 (SMART); IPR013783 (G3DSA:2.60.40.GENE3D); IPR013098 (PFAM); IPR013783 (G3DSA:2.60.40.GENE3D); IPR007110 (PROSITE_PROFILES); IPR007110 (PROSITE_PROFILES); SSF48726 (SUPERFAMILY); SSF48726 (SUPERFAMILY)                                                                                                                                                                                                                                                                                                                                                         |

|      |                                                                                                               |     |                                |      |           |        |         |                                                                                                                                                                                                                                                                                                                                                                                                                                                                                                                                                                                                                                                                                      |
|------|---------------------------------------------------------------------------------------------------------------|-----|--------------------------------|------|-----------|--------|---------|--------------------------------------------------------------------------------------------------------------------------------------------------------------------------------------------------------------------------------------------------------------------------------------------------------------------------------------------------------------------------------------------------------------------------------------------------------------------------------------------------------------------------------------------------------------------------------------------------------------------------------------------------------------------------------------|
| 1875 | c39869_g2_i1_len_3883_path_11256_0_3_10<br>670_4_47_11277_48_91_11277_92_135_680<br>9_136_518_7192_519_5_3    | 645 | integrin alpha-8-like          | 1295 | 9.03E-165 | 48.80% | 0.135   | IPR000413 (PRINTS); IPR013519 (SMART); G3DSA:2.60.40.1510 (GENE3D); G3DSA:1.20.5.930 (GENE3D); PF13517 (PFAM); G3DSA:2.130.10.130 (GENE3D); G3DSA:2.60.40.1460 (GENE3D); IPR013649 (PFAM); G3DSA:2.60.40.1530 (GENE3D); PTHR23220:SF71 (PANTHER); PTHR23220 (PANTHER); NON_CYTOPLASMIC_DOMAIN (PHOBIUS); CYTOPLASMIC_DOMAIN (PHOBIUS); TRANSMEMBRANE (PHOBIUS); IPR013519 (PROSITE_PROFILES); IPR013519 (PROSITE_PROFILES); IPR013519 (PROSITE_PROFILES); IPR013519 (PROSITE_PROFILES); IPR013519 (PROSITE_PROFILES); SSF69179 (SUPERFAMILY); SSF69318 (SUPERFAMILY); SSF69179 (SUPERFAMILY); SSF69179 (SUPERFAMILY); TMhelix (TMHMM); TMhelix (TMHMM)                               |
| 1876 | c39869_g2_i3_len_3927_path_11256_0_3_10<br>670_4_47_11277_48_91_11277_92_135_112<br>77_136_179_6809__180_3    | 633 | integrin alpha-8-like          | 1309 | 9.31E-165 | 48.80% | 0.135   | IPR000413 (PRINTS); IPR013519 (SMART); IPR013649 (PFAM); PF13517 (PFAM); G3DSA:2.60.40.1510 (GENE3D); G3DSA:2.60.40.1530 (GENE3D); G3DSA:2.60.40.1460 (GENE3D); G3DSA:1.20.5.930 (GENE3D); G3DSA:2.130.10.130 (GENE3D); PTHR23220 (PANTHER); PTHR23220:SF71 (PANTHER); CYTOPLASMIC_DOMAIN (PHOBIUS); NON_CYTOPLASMIC_DOMAIN (PHOBIUS); TRANSMEMBRANE (PHOBIUS); IPR013519 (PROSITE_PROFILES); IPR013519 (PROSITE_PROFILES); IPR013519 (PROSITE_PROFILES); IPR013519 (PROSITE_PROFILES); IPR013519 (PROSITE_PROFILES); IPR013519 (PROSITE_PROFILES); SSF69179 (SUPERFAMILY); SSF69318 (SUPERFAMILY); SSF69179 (SUPERFAMILY); SSF69179 (SUPERFAMILY); TMhelix (TMHMM); TMhelix (TMHMM) |
| 1877 | c39874_g1_i1_len_1755_path_2031_0_270_2<br>301_271_287_2030_288_1154_3184_1155_1<br>184_505_1185_1354_324_1_0 | 361 | cytochrome p450 2j6            | 585  | 7.37E-116 | 59.20% | 0.115   | IPR002401 (PRINTS); IPR001128 (PRINTS); IPR001128 (PFAM); IPR001128 (G3DSA:1.10.630.GENE3D); PTHR24300 (PANTHER); IPR017972 (PROSITE_PATTERNS); NON_CYTOPLASMIC_DOMAIN (PHOBIUS); CYTOPLASMIC_DOMAIN (PHOBIUS); TRANSMEMBRANE (PHOBIUS); CYTOPLASMIC_DOMAIN (PHOBIUS); TRANSMEMBRANE (PHOBIUS); IPR001128 (SUPERFAMILY); TMhelix (TMHMM)                                                                                                                                                                                                                                                                                                                                             |
| 1878 | c39874_g2_i1_len_2390_path_8426_0_920_3<br>184_921_950_3213_951_2117_36_2118_238<br>9_0                       | 436 | aael002067- partial            | 797  | 1.51E-123 | 58.50% | 0.421 Y | IPR002401 (PRINTS); IPR001128 (PRINTS); IPR001128 (G3DSA:1.10.630.GENE3D); IPR001128 (PFAM); PTHR24300 (PANTHER); IPR017972 (PROSITE_PATTERNS); SIGNAL_PEPTIDE_H_REGION (PHOBIUS); SIGNAL_PEPTIDE_C_REGION (PHOBIUS); TRANSMEMBRANE (PHOBIUS); TRANSMEMBRANE (PHOBIUS); NON_CYTOPLASMIC_DOMAIN (PHOBIUS); NON_CYTOPLASMIC_DOMAIN (PHOBIUS); CYTOPLASMIC_DOMAIN (PHOBIUS); SIGNAL_PEPTIDE_N_REGION (PHOBIUS); CYTOPLASMIC_DOMAIN (PHOBIUS); SIGNAL_PEPTIDE (PHOBIUS); TRANSMEMBRANE (PHOBIUS); IPR001128 (SUPERFAMILY)                                                                                                                                                                |
| 1879 | c39879_g2_i1_len_2238_path_4351_0_54_44<br>06_55_886_5236_887_1664_6014__1665_2<br>058_6408_2059_2059_2       | 674 | lysine--trna ligase isoform x2 | 746  | 0         | 86.20% | 0.108   | Coil (COILS); IPR018149 (PRINTS); G3DSA:3.30.930.10 (GENE3D); IPR004364 (PFAM); IPR002313 (TIGRFAM); IPR004365 (PFAM); IPR012340 (G3DSA:2.40.50.GENE3D); PTHR22594:SF4 (PANTHER); IPR018150 (PANTHER); CYTOPLASMIC_DOMAIN (PHOBIUS); NON_CYTOPLASMIC_DOMAIN (PHOBIUS); TRANSMEMBRANE (PHOBIUS); NON_CYTOPLASMIC_DOMAIN (PHOBIUS); TRANSMEMBRANE (PHOBIUS); IPR006195 (PROSITE_PROFILES); IPR002313 (HAMAP); SSF55681 (SUPERFAMILY); IPR012340 (SUPERFAMILY); TMhelix (TMHMM); TMhelix (TMHMM)                                                                                                                                                                                        |
| 1880 | c39879_g2_i2_len_2222_path_9159_0_38_44<br>06_39_870_5236_871_1648_6014__1649_2<br>042_6408_2043_2043_1       | 574 | lysine--trna ligase isoform x1 | 741  | 0         | 86.30% | 0.115   | Coil (COILS); IPR018149 (PRINTS); G3DSA:3.30.930.10 (GENE3D); IPR002313 (TIGRFAM); IPR004364 (PFAM); IPR004365 (PFAM); IPR012340 (G3DSA:2.40.50.GENE3D); PTHR22594:SF4 (PANTHER); IPR018150 (PANTHER); NON_CYTOPLASMIC_DOMAIN (PHOBIUS); TRANSMEMBRANE (PHOBIUS); CYTOPLASMIC_DOMAIN (PHOBIUS); NON_CYTOPLASMIC_DOMAIN (PHOBIUS); TRANSMEMBRANE (PHOBIUS); IPR006195 (PROSITE_PROFILES); IPR002313 (HAMAP); SSF55681 (SUPERFAMILY); IPR012340 (SUPERFAMILY); TMhelix (TMHMM); TMhelix (TMHMM)                                                                                                                                                                                        |
| 1881 | c39879_g2_i3_len_998_path_4351_0_54_440<br>6_55_886_11730_887_997_2                                           | 277 | lysyl-trna synthetase          | 332  | 6.38E-146 | 83.20% | 0.108   | Coil (COILS); IPR018149 (PRINTS); IPR004364 (PFAM); G3DSA:3.30.930.10 (GENE3D); IPR012340 (G3DSA:2.40.50.GENE3D); IPR004365 (PFAM); PTHR22594:SF4 (PANTHER); IPR018150 (PANTHER); IPR006195 (PROSITE_PROFILES); SSF55681 (SUPERFAMILY); IPR012340 (SUPERFAMILY)                                                                                                                                                                                                                                                                                                                                                                                                                      |

|      |                                                                                                         |      |                              |      |           |        |         |                                                                                                                                                                                                                                                                                                                                                                                                                                                                                                                                                                                                                                                                                                                                                                                                                                                                                                                                                                                                                                                                            |
|------|---------------------------------------------------------------------------------------------------------|------|------------------------------|------|-----------|--------|---------|----------------------------------------------------------------------------------------------------------------------------------------------------------------------------------------------------------------------------------------------------------------------------------------------------------------------------------------------------------------------------------------------------------------------------------------------------------------------------------------------------------------------------------------------------------------------------------------------------------------------------------------------------------------------------------------------------------------------------------------------------------------------------------------------------------------------------------------------------------------------------------------------------------------------------------------------------------------------------------------------------------------------------------------------------------------------------|
| 1882 | c39881_g3_i2_len_2305_path_441_0_203_64_5_204_413_853_414_609_1048_610_667_11_05_668_676_68_677_2304_2  | 257  | vitellogenin receptor        | 768  | 1.50E-70  | 48.60% | 0.116   | IPR002172 (PRINTS); IPR002172 (SMART); IPR000033 (SMART); IPR002172 (G3DSA:4.10.400.GENE3D); IPR002172 (G3DSA:4.10.400.GENE3D); IPR002172 (PFAM); IPR011042 (G3DSA:2.120.10.GENE3D); PF14670 (PFAM); G3DSA:2.10.25.10 (GENE3D); IPR002172 (G3DSA:4.10.400.GENE3D); PTHR10529 (PANTHER); PTHR10529:SF222 (PANTHER); IPR023415 (PROSITE_PATTERNS); IPR023415 (PROSITE_PATTERNS); IPR023415 (PROSITE_PATTERNS); IPR023415 (PROSITE_PATTERNS); IPR023415 (PROSITE_PATTERNS); NON_CYTOPLASMIC_DOMAIN (PHOBIUS); TRANSMEMBRANE (PHOBIUS); CYTOPLASMIC_DOMAIN (PHOBIUS); IPR002172 (PROSITE_PROFILES); IPR002172 (PROSITE_PROFILES); IPR002172 (PROSITE_PROFILES); IPR000033 (PROSITE_PROFILES); IPR000033 (PROSITE_PROFILES); IPR002172 (PROSITE_PROFILES); IPR000033 (PROSITE_PROFILES); IPR002172 (PROSITE_PROFILES); IPR000033 (PROSITE_PROFILES); IPR002172 (PROSITE_PROFILES); IPR002172 (SUPERFAMILY); SSF63825 (SUPERFAMILY); IPR002172 (SUPERFAMILY); IPR002172 (SUPERFAMILY); IPR002172 (SUPERFAMILY); IPR002172 (SUPERFAMILY); SSF57196 (SUPERFAMILY); TMhelix (TMHMM) |
| 1883 | c39884_g1_i1_len_1022_path_6065_0_1021_1                                                                | 160  | pacifastin light chain       | 341  | 1.54E-35  | 42.90% | 0.859Y  | IPR006552 (SMART); IPR008037 (PFAM); NON_CYTOPLASMIC_DOMAIN (PHOBIUS); TRANSMEMBRANE (PHOBIUS); CYTOPLASMIC_DOMAIN (PHOBIUS); IPR020862 (PROSITE_PROFILES); IPR020862 (PROSITE_PROFILES); IPR020862 (PROSITE_PROFILES); IPR001190 (PROSITE_PROFILES); IPR020862 (PROSITE_PROFILES); IPR020862 (PROSITE_PROFILES); IPR020862 (PROSITE_PROFILES); IPR020862 (PROSITE_PROFILES); SignalP-noTM (SIGNALP_EUK); IPR008037 (SUPERFAMILY); IPR008037 (SUPERFAMILY); IPR008037 (SUPERFAMILY); IPR008037 (SUPERFAMILY); IPR008037 (SUPERFAMILY); IPR008037 (SUPERFAMILY)                                                                                                                                                                                                                                                                                                                                                                                                                                                                                                             |
| 1884 | c39884_g2_i1_len_2615_path_629_0_708_59_44_709_733_1363_734_1291_278_1292_131_6_1944_1317_1815_2443_1_2 | 942  | pacifastin light chain       | 871  | 2.93E-32  | 46.70% | 0.134   | IPR001007 (SMART); IPR002223 (SMART); IPR008037 (PFAM); IPR002223 (G3DSA:4.10.410.GENE3D); IPR002223 (G3DSA:4.10.410.GENE3D); IPR002223 (PFAM); PTHR10083 (PANTHER); IPR020862 (PROSITE_PROFILES); IPR001007 (PROSITE_PROFILES); IPR020862 (PROSITE_PROFILES); IPR020862 (PROSITE_PROFILES); IPR020862 (PROSITE_PROFILES); IPR020862 (PROSITE_PROFILES); IPR020862 (PROSITE_PROFILES); IPR020862 (PROSITE_PROFILES); IPR002223 (PROSITE_PROFILES); IPR020862 (PROSITE_PROFILES); IPR002223 (PROSITE_PROFILES); IPR001190 (PROSITE_PROFILES); IPR008037 (SUPERFAMILY); IPR008037 (SUPERFAMILY); IPR008037 (SUPERFAMILY); IPR002223 (SUPERFAMILY); IPR008037 (SUPERFAMILY); IPR002223 (SUPERFAMILY); IPR008037 (SUPERFAMILY); IPR008037 (SUPERFAMILY); IPR008037 (SUPERFAMILY); IPR008037 (SUPERFAMILY)                                                                                                                                                                                                                                                                      |
| 1885 | c39884_g3_i1_len_302_path_1_0_276_278_2_77_301_1                                                        | 56   | pacifastin light chain       | 101  | 2.92E-13  | 48.30% | 0.219   | IPR008037 (PFAM); IPR020862 (PROSITE_PROFILES); IPR020862 (PROSITE_PROFILES); IPR008037 (SUPERFAMILY)                                                                                                                                                                                                                                                                                                                                                                                                                                                                                                                                                                                                                                                                                                                                                                                                                                                                                                                                                                      |
| 1886 | c39901_g1_i1_len_3065_path_4585_0_1023_5608_1024_1033_2760_1034_1277_5858_12_78_1300_254_1301_1543_6_2  | 1633 | meprin a                     | 1021 | 1.21E-71  | 50.10% | 0.785 Y | IPR001506 (PRINTS); IPR000859 (SMART); IPR006026 (SMART); IPR024079 (G3DSA:3.40.390.GENE3D); IPR001506 (PFAM); IPR000859 (PFAM); IPR000859 (G3DSA:2.60.120.GENE3D); IPR000859 (G3DSA:2.60.120.GENE3D); PTHR10127:SF580 (PANTHER); PTHR10127 (PANTHER); CYTOPLASMIC_DOMAIN (PHOBIUS); NON_CYTOPLASMIC_DOMAIN (PHOBIUS); SIGNAL_PEPTIDE_C_REGION (PHOBIUS); TRANSMEMBRANE (PHOBIUS); NON_CYTOPLASMIC_DOMAIN (PHOBIUS); SIGNAL_PEPTIDE_H_REGION (PHOBIUS); SIGNAL_PEPTIDE (PHOBIUS); SIGNAL_PEPTIDE_N_REGION (PHOBIUS); TRANSMEMBRANE (PHOBIUS); IPR000859 (PROSITE_PROFILES); SignalP-noTM (SIGNALP_EUK); IPR000859 (SUPERFAMILY); SSF55486 (SUPERFAMILY)                                                                                                                                                                                                                                                                                                                                                                                                                    |
| 1887 | c39912_g1_i1_len_2709_path_1_0_2086_208_8_2087_2087_2089_2088_2398_2400_2399_2415_2417_2416_2708_2      | 1131 | integral membrane protein 2c | 903  | 1.56E-117 | 67.30% | 0.137   | IPR007084 (SMART); IPR007084 (PFAM); PTHR10962:SF1 (PANTHER); PTHR10962 (PANTHER); TRANSMEMBRANE (PHOBIUS); CYTOPLASMIC_DOMAIN (PHOBIUS); NON_CYTOPLASMIC_DOMAIN (PHOBIUS); TRANSMEMBRANE (PHOBIUS); TRANSMEMBRANE (PHOBIUS); NON_CYTOPLASMIC_DOMAIN (PHOBIUS); CYTOPLASMIC_DOMAIN (PHOBIUS); IPR007084 (PROSITE_PROFILES); TMhelix (TMHMM); TMhelix (TMHMM); TMhelix (TMHMM)                                                                                                                                                                                                                                                                                                                                                                                                                                                                                                                                                                                                                                                                                              |

|      |                                                                                                      |      |                                                           |      |           |        |        |                                                                                                                                                                                                                                                                                                                                                                                                                                                                                                                                                                                                                                                                                                                                                                                                                                                                                                                                                                                                                      |
|------|------------------------------------------------------------------------------------------------------|------|-----------------------------------------------------------|------|-----------|--------|--------|----------------------------------------------------------------------------------------------------------------------------------------------------------------------------------------------------------------------------------------------------------------------------------------------------------------------------------------------------------------------------------------------------------------------------------------------------------------------------------------------------------------------------------------------------------------------------------------------------------------------------------------------------------------------------------------------------------------------------------------------------------------------------------------------------------------------------------------------------------------------------------------------------------------------------------------------------------------------------------------------------------------------|
| 1888 | c39921_g1_i1_len_2452_path_3813_0_845_2_82_846_1747_1182_1748_1762_1197_1763_1975_1410_1976_1998_1   | 654  | golgi-associated plant pathogenesis-related protein 1     | 817  | 1.48E-155 | 62.20% | 0.151  | IPR001283 (PRINTS); IPR014044 (SMART); IPR014044 (G3DSA:3.40.33.GENE3D); IPR014044 (PFAM); IPR001283 (PANTHER); PTHR10334:SF189 (PANTHER); IPR018244 (PROSITE_PATTERNS); IPR018244 (PROSITE_PATTERNS); IPR014044 (SUPERFAMILY); IPR014044 (SUPERFAMILY)                                                                                                                                                                                                                                                                                                                                                                                                                                                                                                                                                                                                                                                                                                                                                              |
| 1889 | c39925_g2_i1_len_12677_path_13128_0_249_11372_250_1166_14293_1167_1169_1429_6_1170_1662_3289_1663_0  | 6262 | phd and ring finger domain-containing protein 1           | 4226 | 3.79E-99  | 54.20% | 0.131  | Coil (COILS); Coil (COILS); IPR001841 (SMART); IPR001965 (SMART); IPR013083 (G3DSA:3.30.40.GENE3D); IPR013083 (G3DSA:3.30.40.GENE3D); IPR019787 (PFAM); IPR001841 (PFAM); PTHR15242 (PANTHER); PTHR15242:SF1 (PANTHER); IPR017907 (PROSITE_PATTERNS); IPR019786 (PROSITE_PATTERNS); TRANSMEMBRANE (PHOBIUS); NON_CYTOPLASMIC_DOMAIN (PHOBIUS); TRANSMEMBRANE (PHOBIUS); TRANSMEMBRANE (PHOBIUS); NON_CYTOPLASMIC_DOMAIN (PHOBIUS); NON_CYTOPLASMIC_DOMAIN (PHOBIUS); NON_CYTOPLASMIC_DOMAIN (PHOBIUS); CYTOPLASMIC_DOMAIN (PHOBIUS); NON_CYTOPLASMIC_DOMAIN (PHOBIUS); CYTOPLASMIC_DOMAIN (PHOBIUS); NON_CYTOPLASMIC_DOMAIN (PHOBIUS); TRANSMEMBRANE (PHOBIUS); TRANSMEMBRANE (PHOBIUS); CYTOPLASMIC_DOMAIN (PHOBIUS); CYTOPLASMIC_DOMAIN (PHOBIUS); TRANSMEMBRANE (PHOBIUS); TRANSMEMBRANE (PHOBIUS); CYTOPLASMIC_DOMAIN (PHOBIUS); IPR001841 (PROSITE_PROFILES); IPR019787 (PROSITE_PROFILES); IPR011011 (SUPERFAMILY); SSF57850 (SUPERFAMILY); TMhelix (TMHMM); TMhelix (TMHMM); TMhelix (TMHMM); TMhelix (TMHMM) |
| 1890 | c39925_g2_i1_len_12677_path_13128_0_249_11372_250_1166_14293_1167_1169_1429_6_1170_1662_3289_1663_2  | 6262 | ring and phd-finger domain-containing protein<br>kiaa1542 | 4225 | 1.05E-20  | 42.50% | 0.176  | Coil (COILS); Coil (COILS); Coil (COILS)                                                                                                                                                                                                                                                                                                                                                                                                                                                                                                                                                                                                                                                                                                                                                                                                                                                                                                                                                                             |
| 1891 | c39932_g3_i1_len_3594_path_5465_0_171_5_637_172_195_10554_196_1186_4268_1187_3593_5                  | 1139 | agap007053-pa-like protein                                | 1198 | 2.19E-70  | 50.30% | 0.162  | Coil (COILS); IPR000716 (SMART); IPR000716 (PFAM); IPR000716 (G3DSA:4.10.800.GENE3D); PTHR12352 (PANTHER); PTHR12352:SF9 (PANTHER); CYTOPLASMIC_DOMAIN (PHOBIUS); CYTOPLASMIC_DOMAIN (PHOBIUS); TRANSMEMBRANE (PHOBIUS); CYTOPLASMIC_DOMAIN (PHOBIUS); TRANSMEMBRANE (PHOBIUS); CYTOPLASMIC_DOMAIN (PHOBIUS); NON_CYTOPLASMIC_DOMAIN (PHOBIUS); NON_CYTOPLASMIC_DOMAIN (PHOBIUS); NON_CYTOPLASMIC_DOMAIN (PHOBIUS); TRANSMEMBRANE (PHOBIUS); TRANSMEMBRANE (PHOBIUS); TRANSMEMBRANE (PHOBIUS); NON_CYTOPLASMIC_DOMAIN (PHOBIUS); IPR000716 (PROSITE_PROFILES); IPR000716 (PROSITE_PROFILES); IPR000716 (PROSITE_PROFILES); IPR000716 (SUPERFAMILY); IPR000716 (SUPERFAMILY); IPR000716 (SUPERFAMILY); TMhelix (TMHMM); TMhelix (TMHMM); TMhelix (TMHMM)                                                                                                                                                                                                                                                              |
| 1892 | c39944_g1_i1_len_2044_path_1_0_246_4751_247_1247_1249_1248_1258_1260_1259_1_410_4613_1411_1422_14_1  | 999  | hemolymph juvenile hormone binding protein                | 681  | 2.93E-40  | 51.10% | 0.389Y | IPR010562 (SMART); IPR010562 (PFAM); PTHR11008 (PANTHER); PTHR11008:SF9 (PANTHER); TRANSMEMBRANE (PHOBIUS); CYTOPLASMIC_DOMAIN (PHOBIUS); NON_CYTOPLASMIC_DOMAIN (PHOBIUS); IPR020234 (PRODOM); TMhelix (TMHMM)                                                                                                                                                                                                                                                                                                                                                                                                                                                                                                                                                                                                                                                                                                                                                                                                      |
| 1893 | c39944_g1_i2_len_1971_path_4381_0_173_4_751_174_1174_1249_1175_1185_1260_118_6_1337_1412_1338_1349_0 | 1146 | hemolymph juvenile hormone binding protein                | 657  | 1.56E-40  | 51.00% | 0.316  | IPR010562 (SMART); IPR010562 (PFAM); PTHR11008 (PANTHER); PTHR11008:SF9 (PANTHER); NON_CYTOPLASMIC_DOMAIN (PHOBIUS); TRANSMEMBRANE (PHOBIUS); CYTOPLASMIC_DOMAIN (PHOBIUS); IPR020234 (PRODOM)                                                                                                                                                                                                                                                                                                                                                                                                                                                                                                                                                                                                                                                                                                                                                                                                                       |
| 1894 | c39950_g3_i1_len_980_path_6855_0_191_15_91_192_196_7144_197_217_1617_218_979_2                       | 268  | apolipoprotein d-like                                     | 326  | 2.74E-42  | 60.40% | 0.346Y | IPR003057 (PRINTS); IPR000566 (PFAM); IPR012674 (G3DSA:2.40.128.GENE3D); PTHR10612 (PANTHER); PTHR10612:SF7 (PANTHER); CYTOPLASMIC_DOMAIN (PHOBIUS); NON_CYTOPLASMIC_DOMAIN (PHOBIUS); TRANSMEMBRANE (PHOBIUS); IPR011038 (SUPERFAMILY); TMhelix (TMHMM)                                                                                                                                                                                                                                                                                                                                                                                                                                                                                                                                                                                                                                                                                                                                                             |



|      |                                                                                                       |      |                       |      |          |        |       |                                                                                                                                                                                                                                                                                                                                                                                                                                                                                                                                                                                                                                                                                                                                                                                                                                                                                                                                                                                                                                                                              |
|------|-------------------------------------------------------------------------------------------------------|------|-----------------------|------|----------|--------|-------|------------------------------------------------------------------------------------------------------------------------------------------------------------------------------------------------------------------------------------------------------------------------------------------------------------------------------------------------------------------------------------------------------------------------------------------------------------------------------------------------------------------------------------------------------------------------------------------------------------------------------------------------------------------------------------------------------------------------------------------------------------------------------------------------------------------------------------------------------------------------------------------------------------------------------------------------------------------------------------------------------------------------------------------------------------------------------|
| 1895 | c39950_g4_i1_len_2120_path_1387_0_180_1_568_181_203_1591_204_208_7144_209_229_4805_230_333_4908_334_2 | 314  | apolipoprotein d-like | 706  | 1.11E-56 | 62.20% | 0.322 | IPR003057 (PRINTS); IPR000566 (PFAM); IPR012674 (G3DSA:2.40.128.GENE3D); PTHR10612 (PANTHER); PTHR10612:SF7 (PANTHER); IPR022272 (PROSITE_PATTERNS); NON_CYTOPLASMIC_DOMAIN (PHOBIUS); TRANSMEMBRANE (PHOBIUS); TRANSMEMBRANE (PHOBIUS); NON_CYTOPLASMIC_DOMAIN (PHOBIUS); CYTOPLASMIC_DOMAIN (PHOBIUS); TRANSMEMBRANE (PHOBIUS); TRANSMEMBRANE (PHOBIUS); CYTOPLASMIC_DOMAIN (PHOBIUS); NON_CYTOPLASMIC_DOMAIN (PHOBIUS); TRANSMEMBRANE (PHOBIUS); CYTOPLASMIC_DOMAIN (PHOBIUS); IPR011038 (SUPERFAMILY); TMhelix (TMHMM); TMhelix (TMHMM); TMhelix (TMHMM); TMhelix (TMHMM)                                                                                                                                                                                                                                                                                                                                                                                                                                                                                                |
| 1896 | c39951_g1_i1_len_2306_path_287_0_48_336_49_71_359_72_76_364_77_1286_5323_12_87_2237_2516_2238_223_1   | 1781 | 5 -nucleotidase-like  | 769  | 3.42E-96 | 54.20% | 0.115 | IPR006179 (PRINTS); IPR029052 (G3DSA:3.60.21.GENE3D); IPR008334 (PFAM); IPR008334 (G3DSA:3.90.780.GENE3D); PTHR11575:SF21 (PANTHER); IPR006179 (PANTHER); CYTOPLASMIC_DOMAIN (PHOBIUS); TRANSMEMBRANE (PHOBIUS); NON_CYTOPLASMIC_DOMAIN (PHOBIUS); IPR008334 (SUPERFAMILY); IPR029052 (SUPERFAMILY); TMhelix (TMHMM)                                                                                                                                                                                                                                                                                                                                                                                                                                                                                                                                                                                                                                                                                                                                                         |
| 1897 | c39956_g1_i1_len_6397_path_8371_0_3206_667_3207_4885_21734_4886_4887_2532_4_888_4936_2581_4937_61_5   | 7441 | titin- partial        | 2132 | 0        | 58.50% | 0.101 | Coil (COILS); PR00014 (PRINTS); IPR003961 (SMART); IPR003598 (SMART); IPR003599 (SMART); IPR013783 (G3DSA:2.60.40.GENE3D); IPR013783 (G3DSA:2.60.40.GENE3D); IPR003961 (PFAM); IPR013098 (PFAM); IPR013783 (G3DSA:2.60.40.GENE3D); IPR013783 (G3DSA:2.60.40.GENE3D); IPR013783 (G3DSA:2.60.40.GENE3D); PTHR19897 (PANTHER); PTHR19897:SF146 (PANTHER); TRANSMEMBRANE (PHOBIUS); NON_CYTOPLASMIC_DOMAIN (PHOBIUS); TRANSMEMBRANE (PHOBIUS); NON_CYTOPLASMIC_DOMAIN (PHOBIUS); CYTOPLASMIC_DOMAIN (PHOBIUS); TRANSMEMBRANE (PHOBIUS); CYTOPLASMIC_DOMAIN (PHOBIUS); IPR007110 (PROSITE_PROFILES); IPR007110 (PROSITE_PROFILES); IPR003961 (PROSITE_PROFILES); IPR007110 (PROSITE_PROFILES); IPR003961 (PROSITE_PROFILES); IPR003961 (PROSITE_PROFILES); IPR007110 (PROSITE_PROFILES); IPR003961 (PROSITE_PROFILES); SSF48726 (SUPERFAMILY); IPR003961 (SUPERFAMILY); SSF48726 (SUPERFAMILY); SSF48726 (SUPERFAMILY); IPR003961 (SUPERFAMILY); SSF48726 (SUPERFAMILY); IPR003961 (SUPERFAMILY); TMhelix (TMHMM); TMhelix (TMHMM); TMhelix (TMHMM)                               |
| 1898 | c39956_g1_i2_len_3492_path_8371_0_3206_517_3207_3491_4                                                | 4086 | titin- partial        | 1164 | 0        | 69.70% | 0.11  | PR00014 (PRINTS); IPR003599 (SMART); IPR003961 (SMART); IPR013783 (G3DSA:2.60.40.GENE3D); IPR013783 (G3DSA:2.60.40.GENE3D); IPR003961 (PFAM); IPR013783 (G3DSA:2.60.40.GENE3D); IPR013098 (PFAM); PTHR19897 (PANTHER); PTHR19897:SF142 (PANTHER); NON_CYTOPLASMIC_DOMAIN (PHOBIUS); CYTOPLASMIC_DOMAIN (PHOBIUS); CYTOPLASMIC_DOMAIN (PHOBIUS); NON_CYTOPLASMIC_DOMAIN (PHOBIUS); TRANSMEMBRANE (PHOBIUS); TRANSMEMBRANE (PHOBIUS); IPR003961 (PROSITE_PROFILES); IPR007110 (PROSITE_PROFILES); IPR003961 (PROSITE_PROFILES); IPR003961 (PROSITE_PROFILES); IPR003961 (PROSITE_PROFILES); SSF48726 (SUPERFAMILY); IPR003961 (SUPERFAMILY); IPR003961 (SUPERFAMILY); TMhelix (TMHMM); TMhelix (TMHMM)                                                                                                                                                                                                                                                                                                                                                                         |
| 1899 | c39956_g1_i3_len_6346_path_8371_0_3206_667_3207_4885_2581_4886_6139_14786_6_140_6165_14811_6166_6_5   | 7434 | titin- partial        | 2115 | 0        | 58.50% | 0.101 | Coil (COILS); PR00014 (PRINTS); IPR003961 (SMART); IPR003599 (SMART); IPR003598 (SMART); IPR013783 (G3DSA:2.60.40.GENE3D); IPR003961 (PFAM); IPR013783 (G3DSA:2.60.40.GENE3D); IPR013098 (PFAM); IPR013783 (G3DSA:2.60.40.GENE3D); IPR013783 (G3DSA:2.60.40.GENE3D); IPR013783 (G3DSA:2.60.40.GENE3D); PTHR19897 (PANTHER); PTHR19897:SF146 (PANTHER); NON_CYTOPLASMIC_DOMAIN (PHOBIUS); CYTOPLASMIC_DOMAIN (PHOBIUS); TRANSMEMBRANE (PHOBIUS); TRANSMEMBRANE (PHOBIUS); NON_CYTOPLASMIC_DOMAIN (PHOBIUS); TRANSMEMBRANE (PHOBIUS); CYTOPLASMIC_DOMAIN (PHOBIUS); IPR007110 (PROSITE_PROFILES); IPR003961 (PROSITE_PROFILES); IPR003961 (PROSITE_PROFILES); IPR007110 (PROSITE_PROFILES); IPR003961 (PROSITE_PROFILES); IPR003961 (PROSITE_PROFILES); IPR003961 (PROSITE_PROFILES); IPR007110 (PROSITE_PROFILES); IPR007110 (PROSITE_PROFILES); IPR003961 (SUPERFAMILY); IPR003961 (SUPERFAMILY); SSF48726 (SUPERFAMILY); SSF48726 (SUPERFAMILY); SSF48726 (SUPERFAMILY); SSF48726 (SUPERFAMILY); IPR003961 (SUPERFAMILY); TMhelix (TMHMM); TMhelix (TMHMM); TMhelix (TMHMM) |

|      |                                                                                                        |      |                              |      |          |        |         |                                                                                                                                                                                                                                                                                                                                                                                                                                                                                                                                                                                                                                                                                                                                                                                                                                                                                                                                                                                                                                                                                                                                                                                                                                                                                                                                                                                                                                                                                                   |
|------|--------------------------------------------------------------------------------------------------------|------|------------------------------|------|----------|--------|---------|---------------------------------------------------------------------------------------------------------------------------------------------------------------------------------------------------------------------------------------------------------------------------------------------------------------------------------------------------------------------------------------------------------------------------------------------------------------------------------------------------------------------------------------------------------------------------------------------------------------------------------------------------------------------------------------------------------------------------------------------------------------------------------------------------------------------------------------------------------------------------------------------------------------------------------------------------------------------------------------------------------------------------------------------------------------------------------------------------------------------------------------------------------------------------------------------------------------------------------------------------------------------------------------------------------------------------------------------------------------------------------------------------------------------------------------------------------------------------------------------------|
| 1900 | c39956_g1_i4_len_8215_path_8371_0_3206_667_3207_4885_21734_4886_4887_714_4888_6705_2532_6706_675_5     | 8038 | titin- partial               | 2738 | 0        | 60.40% | 0.101   | Coil (COILS); PR00014 (PRINTS); IPR003599 (SMART); IPR001452 (SMART); IPR003961 (SMART); IPR003598 (SMART); IPR013098 (PFAM); G3DSA:2.30.30.40 (GENE3D); IPR001452 (PFAM); IPR013783 (G3DSA:2.60.40.GENE3D); IPR013783 (G3DSA:2.60.40.GENE3D); IPR013783 (G3DSA:2.60.40.GENE3D); IPR013783 (G3DSA:2.60.40.GENE3D); IPR013783 (G3DSA:2.60.40.GENE3D); IPR013783 (G3DSA:2.60.40.GENE3D); IPR003961 (PFAM); IPR013783 (G3DSA:2.60.40.GENE3D); PTHR19897 (PANTHER); CYTOPLASMIC_DOMAIN (PHOBIUS); NON_CYTOPLASMIC_DOMAIN (PHOBIUS); CYTOPLASMIC_DOMAIN (PHOBIUS); NON_CYTOPLASMIC_DOMAIN (PHOBIUS); TRANSMEMBRANE (PHOBIUS); TRANSMEMBRANE (PHOBIUS); IPR001452 (PROSITE_PROFILES); IPR007110 (PROSITE_PROFILES); IPR007110 (PROSITE_PROFILES); IPR007110 (PROSITE_PROFILES); IPR003961 (PROSITE_PROFILES); IPR007110 (PROSITE_PROFILES); IPR007110 (PROSITE_PROFILES); IPR007110 (PROSITE_PROFILES); IPR003961 (PROSITE_PROFILES); IPR003961 (PROSITE_PROFILES); IPR007110 (PROSITE_PROFILES); IPR003961 (PROSITE_PROFILES); IPR007110 (PROSITE_PROFILES); IPR003961 (PROSITE_PROFILES); IPR007110 (PROSITE_PROFILES); SSF48726 (SUPERFAMILY); SSF48726 (SUPERFAMILY); SSF48726 (SUPERFAMILY); SSF48726 (SUPERFAMILY); SSF48726 (SUPERFAMILY); IPR003961 (SUPERFAMILY); IPR001452 (SUPERFAMILY); SSF48726 (SUPERFAMILY); SSF48726 (SUPERFAMILY); IPR003961 (SUPERFAMILY); SSF48726 (SUPERFAMILY); IPR003961 (SUPERFAMILY); SSF48726 (SUPERFAMILY); TMhelix (TMHMM); TMhelix (TMHMM); TMhelix (TMHMM) |
| 1901 | c39956_g1_i5_len_6682_path_8371_0_3206_466_3207_3257_517_3258_3542_667_3543_5221_2581_5222_6475_5      | 7648 | titin- partial               | 2227 | 0        | 69.00% | 0.101   | Coil (COILS); PR00014 (PRINTS); IPR003599 (SMART); IPR003961 (SMART); IPR003598 (SMART); IPR013783 (G3DSA:2.60.40.GENE3D); IPR013783 (G3DSA:2.60.40.GENE3D); IPR013098 (PFAM); IPR013783 (G3DSA:2.60.40.GENE3D); IPR013783 (G3DSA:2.60.40.GENE3D); IPR013783 (G3DSA:2.60.40.GENE3D); IPR003961 (PFAM); IPR013783 (G3DSA:2.60.40.GENE3D); PTHR19897:SF146 (PANTHER); PTHR19897 (PANTHER); TRANSMEMBRANE (PHOBIUS); TRANSMEMBRANE (PHOBIUS); NON_CYTOPLASMIC_DOMAIN (PHOBIUS); NON_CYTOPLASMIC_DOMAIN (PHOBIUS); TRANSMEMBRANE (PHOBIUS); CYTOPLASMIC_DOMAIN (PHOBIUS); CYTOPLASMIC_DOMAIN (PHOBIUS); IPR007110 (PROSITE_PROFILES); IPR007110 (PROSITE_PROFILES); IPR007110 (PROSITE_PROFILES); IPR003961 (PROSITE_PROFILES); IPR007110 (PROSITE_PROFILES); IPR003961 (PROSITE_PROFILES); IPR007110 (PROSITE_PROFILES); IPR003961 (PROSITE_PROFILES); IPR007110 (PROSITE_PROFILES); IPR003961 (PROSITE_PROFILES); IPR007110 (PROSITE_PROFILES); SSF48726 (SUPERFAMILY); IPR003961 (SUPERFAMILY); SSF48726 (SUPERFAMILY); SSF48726 (SUPERFAMILY); IPR003961 (SUPERFAMILY); SSF48726 (SUPERFAMILY); IPR003961 (SUPERFAMILY); SSF48726 (SUPERFAMILY); TMhelix (TMHMM); TMhelix (TMHMM); TMhelix (TMHMM)                                                                                                                                                                                                                                                                                                |
| 1902 | c39980_g1_i1_len_1313_path_1747_0_501_2_241_502_505_320_506_763_2500_764_788_2525_789_956_104_957_10_0 | 4190 | mite allergen lep d partial  | 438  | 3.86E-18 | 49.60% | 0.567Y  | PTHR11008:SF13 (PANTHER); PTHR11008 (PANTHER); IPR020234 (PRODOM); SignalP-noTM (SIGNALP_EUK)                                                                                                                                                                                                                                                                                                                                                                                                                                                                                                                                                                                                                                                                                                                                                                                                                                                                                                                                                                                                                                                                                                                                                                                                                                                                                                                                                                                                     |
| 1903 | c39980_g1_i2_len_1260_path_1747_0_501_2_241_502_505_320_506_763_3040_764_788_2525_789_956_2690_957_9_0 | 4271 | mite allergen lep d partial  | 420  | 2.19E-18 | 49.60% | 0.567 Y | PTHR11008 (PANTHER); PTHR11008:SF13 (PANTHER); IPR020234 (PRODOM); SignalP-noTM (SIGNALP_EUK)                                                                                                                                                                                                                                                                                                                                                                                                                                                                                                                                                                                                                                                                                                                                                                                                                                                                                                                                                                                                                                                                                                                                                                                                                                                                                                                                                                                                     |
| 1904 | c39990_g1_i1_len_1266_path_251_0_82_334_83_84_229_85_978_1417_979_1265_1                               | 166  | adiponectin receptor protein | 422  | 1.26E-90 | 67.00% | 0.168   | IPR004254 (PFAM); PTHR20855:SF15 (PANTHER); IPR004254 (PANTHER); NON_CYTOPLASMIC_DOMAIN (PHOBIUS); NON_CYTOPLASMIC_DOMAIN (PHOBIUS); CYTOPLASMIC_DOMAIN (PHOBIUS); TRANSMEMBRANE (PHOBIUS); TRANSMEMBRANE (PHOBIUS); TRANSMEMBRANE (PHOBIUS); TRANSMEMBRANE (PHOBIUS); CYTOPLASMIC_DOMAIN (PHOBIUS); CYTOPLASMIC_DOMAIN (PHOBIUS); NON_CYTOPLASMIC_DOMAIN (PHOBIUS); TRANSMEMBRANE (PHOBIUS); TMhelix (TMHMM); TMhelix (TMHMM); TMhelix (TMHMM); TMhelix (TMHMM)                                                                                                                                                                                                                                                                                                                                                                                                                                                                                                                                                                                                                                                                                                                                                                                                                                                                                                                                                                                                                                  |

|      |                                                                                                      |      |                                                 |      |           |        |         |                                                                                                                                                                                                                                                                                                                                                                                                                                                                                                                                                                                                |
|------|------------------------------------------------------------------------------------------------------|------|-------------------------------------------------|------|-----------|--------|---------|------------------------------------------------------------------------------------------------------------------------------------------------------------------------------------------------------------------------------------------------------------------------------------------------------------------------------------------------------------------------------------------------------------------------------------------------------------------------------------------------------------------------------------------------------------------------------------------------|
| 1905 | c39990_g1_i2_len_1389_path_3107_0_11_33_4_12_13_229_14_907_1225_908_1101_1417_1102_1388_2            | 294  | adiponectin receptor protein                    | 463  | 1.07E-151 | 70.80% | 0.097   | IPR004254 (PFAM); IPR004254 (PANTHER); PTHR20855:SF15 (PANTHER); CYTOPLASMIC_DOMAIN (PHOBIUS); CYTOPLASMIC_DOMAIN (PHOBIUS); TRANSMEMBRANE (PHOBIUS); TRANSMEMBRANE (PHOBIUS); TRANSMEMBRANE (PHOBIUS); NON_CYTOPLASMIC_DOMAIN (PHOBIUS); NON_CYTOPLASMIC_DOMAIN (PHOBIUS); TRANSMEMBRANE (PHOBIUS); TRANSMEMBRANE (PHOBIUS); NON_CYTOPLASMIC_DOMAIN (PHOBIUS); NON_CYTOPLASMIC_DOMAIN (PHOBIUS); TRANSMEMBRANE (PHOBIUS); TRANSMEMBRANE (PHOBIUS); CYTOPLASMIC_DOMAIN (PHOBIUS); TMhelix (TMHMM); TMhelix (TMHMM); TMhelix (TMHMM); TMhelix (TMHMM); TMhelix (TMHMM)                          |
| 1906 | c39990_g1_i3_len_1460_path_251_0_82_334_83_84_229_85_978_1225_979_1172_1417_1173_1459_1              | 295  | adiponectin receptor protein                    | 487  | 1.98E-151 | 70.70% | 0.168   | IPR004254 (PFAM); IPR004254 (PANTHER); PTHR20855:SF15 (PANTHER); NON_CYTOPLASMIC_DOMAIN (PHOBIUS); TRANSMEMBRANE (PHOBIUS); CYTOPLASMIC_DOMAIN (PHOBIUS); TRANSMEMBRANE (PHOBIUS); NON_CYTOPLASMIC_DOMAIN (PHOBIUS); TRANSMEMBRANE (PHOBIUS); CYTOPLASMIC_DOMAIN (PHOBIUS); TRANSMEMBRANE (PHOBIUS); CYTOPLASMIC_DOMAIN (PHOBIUS); TRANSMEMBRANE (PHOBIUS); TRANSMEMBRANE (PHOBIUS); NON_CYTOPLASMIC_DOMAIN (PHOBIUS); CYTOPLASMIC_DOMAIN (PHOBIUS); TRANSMEMBRANE (PHOBIUS); TMhelix (TMHMM); TMhelix (TMHMM); TMhelix (TMHMM); TMhelix (TMHMM); TMhelix (TMHMM)                              |
| 1907 | c40007_g1_i1_len_5313_path_1_0_2034_2036_2035_2141_2143_2142_5312_4                                  | 994  | angiotensin-converting enzyme                   | 1771 | 0         | 63.80% | 0.145   | IPR001548 (PRINTS); IPR001548 (PFAM); IPR001548 (PANTHER); PTHR10514:SF17 (PANTHER); TRANSMEMBRANE (PHOBIUS); TRANSMEMBRANE (PHOBIUS); TRANSMEMBRANE (PHOBIUS); CYTOPLASMIC_DOMAIN (PHOBIUS); TRANSMEMBRANE (PHOBIUS); CYTOPLASMIC_DOMAIN (PHOBIUS); NON_CYTOPLASMIC_DOMAIN (PHOBIUS); TRANSMEMBRANE (PHOBIUS); NON_CYTOPLASMIC_DOMAIN (PHOBIUS); TRANSMEMBRANE (PHOBIUS); NON_CYTOPLASMIC_DOMAIN (PHOBIUS); TRANSMEMBRANE (PHOBIUS); NON_CYTOPLASMIC_DOMAIN (PHOBIUS); TRANSMEMBRANE (PHOBIUS); CYTOPLASMIC_DOMAIN (PHOBIUS); SSF55486 (SUPERFAMILY); SSF55486 (SUPERFAMILY); TMhelix (TMHMM) |
| 1908 | c40015_g1_i2_len_1308_path_395_0_38_307_39_261_656_262_276_671_277_316_711_317_333_728_334_464_858_0 | 2606 | hemagglutinin amebocyte aggregation factor-like | 436  | 5.58E-39  | 62.20% | 0.227   | PF14704 (PFAM); IPR026645 (PANTHER); TRANSMEMBRANE (PHOBIUS); NON_CYTOPLASMIC_DOMAIN (PHOBIUS); CYTOPLASMIC_DOMAIN (PHOBIUS); TRANSMEMBRANE (PHOBIUS); NON_CYTOPLASMIC_DOMAIN (PHOBIUS); TRANSMEMBRANE (PHOBIUS); NON_CYTOPLASMIC_DOMAIN (PHOBIUS); CYTOPLASMIC_DOMAIN (PHOBIUS); TRANSMEMBRANE (PHOBIUS); TMhelix (TMHMM); TMhelix (TMHMM); TMhelix (TMHMM)                                                                                                                                                                                                                                   |
| 1909 | c40015_g2_i1_len_1487_path_3359_0_49_34_08_50_53_126_54_187_3542_188_201_3271_202_479_104_480_1486_2 | 8917 | dermatopontin 2                                 | 495  | 2.13E-36  | 58.90% | 0.189   | Coil (COILS); PF14704 (PFAM); IPR026645 (PANTHER); TRANSMEMBRANE (PHOBIUS); CYTOPLASMIC_DOMAIN (PHOBIUS); TRANSMEMBRANE (PHOBIUS); CYTOPLASMIC_DOMAIN (PHOBIUS); NON_CYTOPLASMIC_DOMAIN (PHOBIUS); TRANSMEMBRANE (PHOBIUS); NON_CYTOPLASMIC_DOMAIN (PHOBIUS); TRANSMEMBRANE (PHOBIUS); TRANSMEMBRANE (PHOBIUS); CYTOPLASMIC_DOMAIN (PHOBIUS); TMhelix (TMHMM); TMhelix (TMHMM)                                                                                                                                                                                                                 |
| 1910 | c40018_g1_i1_len_1954_path_317_0_662_976_663_689_1003_690_1011_1322_1012_1016_30_1017_1953_4         | 3872 | membrane glycoprotein lig-                      | 651  | 1.08E-19  | 47.80% | 0.434 Y | IPR003591 (SMART); G3DSA:3.80.10.10 (GENE3D); IPR001611 (PFAM); PTHR24365 (PANTHER); NON_CYTOPLASMIC_DOMAIN (PHOBIUS); SIGNAL_PEPTIDE_H_REGION (PHOBIUS); SIGNAL_PEPTIDE_C_REGION (PHOBIUS); SIGNAL_PEPTIDE_N_REGION (PHOBIUS); SIGNAL_PEPTIDE (PHOBIUS); SignalP-TM (SIGNALP_GRAM_POSITIVE); SSF52058 (SUPERFAMILY)                                                                                                                                                                                                                                                                           |

|      |                                                                                                       |      |                                              |      |          |        |        |                                                                                                                                                                                                                                                                                                                                                                                                                                                                                                                                                                                                                                                                                                                                              |
|------|-------------------------------------------------------------------------------------------------------|------|----------------------------------------------|------|----------|--------|--------|----------------------------------------------------------------------------------------------------------------------------------------------------------------------------------------------------------------------------------------------------------------------------------------------------------------------------------------------------------------------------------------------------------------------------------------------------------------------------------------------------------------------------------------------------------------------------------------------------------------------------------------------------------------------------------------------------------------------------------------------|
| 1911 | c40021_g1_i1_len_5279_path_5458_0_1364_6820_1365_5278_3                                               | 894  | puromycin-sensitive aminopeptidase-like      | 1760 | 0        | 78.80% | 0.235  | Coil (COILS); IPR014782 (PRINTS); G3DSA:1.10.390.10 (GENE3D); IPR024571 (PFAM); IPR014782 (PFAM); IPR001930 (PANTHER); PTHR11533:SF163 (PANTHER); TRANSMEMBRANE (PHOBIUS); TRANSMEMBRANE (PHOBIUS); NON_CYTOPLASMIC_DOMAIN (PHOBIUS); CYTOPLASMIC_DOMAIN (PHOBIUS); NON_CYTOPLASMIC_DOMAIN (PHOBIUS); CYTOPLASMIC_DOMAIN (PHOBIUS); NON_CYTOPLASMIC_DOMAIN (PHOBIUS); TRANSMEMBRANE (PHOBIUS); TRANSMEMBRANE (PHOBIUS); TRANSMEMBRANE (PHOBIUS); NON_CYTOPLASMIC_DOMAIN (PHOBIUS); TRANSMEMBRANE (PHOBIUS); CYTOPLASMIC_DOMAIN (PHOBIUS); TRANSMEMBRANE (PHOBIUS); CYTOPLASMIC_DOMAIN (PHOBIUS); NON_CYTOPLASMIC_DOMAIN (PHOBIUS); TRANSMEMBRANE (PHOBIUS); SSF63737 (SUPERFAMILY); SSF55486 (SUPERFAMILY); TMhelix (TMHMM); TMhelix (TMHMM) |
| 1912 | c40030_g1_i1_len_2174_path_2574_0_82_26_57_83_295_2870_296_1267_3841_1268_12_78_420_1279_1398_3970_2  | 225  | 3-hydroxyisobutyrate dehydrogenase           | 724  | 4.09E-74 | 57.10% | 0.133  | IPR013328 (G3DSA:1.10.1040.GENE3D); IPR029154 (PFAM); IPR006115 (PFAM); IPR016040 (G3DSA:3.40.50.GENE3D); PTHR22981:SF7 (PANTHER); PTHR22981 (PANTHER); IPR029752 (PROSITE_PATTERNS); NON_CYTOPLASMIC_DOMAIN (PHOBIUS); CYTOPLASMIC_DOMAIN (PHOBIUS); TRANSMEMBRANE (PHOBIUS); IPR008927 (SUPERFAMILY); SSF51735 (SUPERFAMILY); TMhelix (TMHMM)                                                                                                                                                                                                                                                                                                                                                                                              |
| 1913 | c40032_g1_i1_len_368_path_6619_0_125_38_11_126_153_6355_154_165_3851_166_367_0                        | 36   | glucose dehydrogenase                        | 123  | 1.86E-30 | 75.30% | 0.212  | IPR000172 (PFAM); G3DSA:3.30.560.10 (GENE3D); PTHR11552 (PANTHER); PTHR11552:SF77 (PANTHER); IPR000172 (PROSITE_PATTERNS); SSF51905 (SUPERFAMILY)                                                                                                                                                                                                                                                                                                                                                                                                                                                                                                                                                                                            |
| 1914 | c40032_g1_i2_len_3148_path_3149_0_133_3_306_134_134_3307_135_638_3811_639_666_3839_667_678_3851_679_0 | 1695 | glucose dehydrogenase                        | 1050 | 0        | 68.40% | 0.363Y | IPR000172 (PFAM); G3DSA:3.50.50.60 (GENE3D); IPR007867 (PFAM); PTHR11552 (PANTHER); PTHR11552:SF77 (PANTHER); IPR000172 (PROSITE_PATTERNS); NON_CYTOPLASMIC_DOMAIN (PHOBIUS); TRANSMEMBRANE (PHOBIUS); CYTOPLASMIC_DOMAIN (PHOBIUS); TRANSMEMBRANE (PHOBIUS); CYTOPLASMIC_DOMAIN (PHOBIUS); SignalP-TM (SIGNALP_GRAM_POSITIVE); SSF51905 (SUPERFAMILY); SSF54373 (SUPERFAMILY); TMhelix (TMHMM)                                                                                                                                                                                                                                                                                                                                              |
| 1915 | c40032_g1_i3_len_3171_path_3149_0_133_7_660_134_150_3300_151_156_3306_157_157_3307_158_661_3811_662_2 | 1779 | glucose dehydrogenase                        | 1057 | 0        | 68.40% | 0.204  | G3DSA:3.50.50.60 (GENE3D); IPR007867 (PFAM); IPR000172 (PFAM); PTHR11552 (PANTHER); PTHR11552:SF77 (PANTHER); IPR000172 (PROSITE_PATTERNS); TRANSMEMBRANE (PHOBIUS); CYTOPLASMIC_DOMAIN (PHOBIUS); CYTOPLASMIC_DOMAIN (PHOBIUS); NON_CYTOPLASMIC_DOMAIN (PHOBIUS); TRANSMEMBRANE (PHOBIUS); SSF51905 (SUPERFAMILY); SSF54373 (SUPERFAMILY); TMhelix (TMHMM)                                                                                                                                                                                                                                                                                                                                                                                  |
| 1916 | c40042_g1_i1_len_3058_path_383_0_26_206_27_1874_50_1875_2724_3101_2725_2741_290_2742_2837_3212_2_0    | 840  | n-acetylated-alpha-linked acidic dipeptidase | 1020 | 0        | 60.00% | 0.255  | G3DSA:3.40.630.10 (GENE3D); G3DSA:3.50.30.30 (GENE3D); IPR003137 (PFAM); IPR007365 (G3DSA:1.20.930.GENE3D); IPR007484 (PFAM); IPR007365 (PFAM); PTHR10404 (PANTHER); NON_CYTOPLASMIC_DOMAIN (PHOBIUS); NON_CYTOPLASMIC_DOMAIN (PHOBIUS); TRANSMEMBRANE (PHOBIUS); CYTOPLASMIC_DOMAIN (PHOBIUS); TRANSMEMBRANE (PHOBIUS); CYTOPLASMIC_DOMAIN (PHOBIUS); TRANSMEMBRANE (PHOBIUS); CYTOPLASMIC_DOMAIN (PHOBIUS); TRANSMEMBRANE (PHOBIUS); SSF53187 (SUPERFAMILY); SSF52025 (SUPERFAMILY); IPR007365 (SUPERFAMILY); TMhelix (TMHMM); TMhelix (TMHMM); TMhelix (TMHMM); TMhelix (TMHMM)                                                                                                                                                           |

|      |                                                                                             |      |                                           |      |           |        |       |                                                                                                                                                                                                                                                                                                                                                                                                                                                                                                                                                                                                                                                                                                                                                                                                                                                                                                                                                                                                                                                                                                                                               |
|------|---------------------------------------------------------------------------------------------|------|-------------------------------------------|------|-----------|--------|-------|-----------------------------------------------------------------------------------------------------------------------------------------------------------------------------------------------------------------------------------------------------------------------------------------------------------------------------------------------------------------------------------------------------------------------------------------------------------------------------------------------------------------------------------------------------------------------------------------------------------------------------------------------------------------------------------------------------------------------------------------------------------------------------------------------------------------------------------------------------------------------------------------------------------------------------------------------------------------------------------------------------------------------------------------------------------------------------------------------------------------------------------------------|
| 1917 | c40059_g1_i1_len_10188_path_365_0_10187_2                                                   | 2258 | multiple ankyrin repeats single kh domain | 3396 | 0         | 61.80% | 0.245 | Coil (COILS); Coil (COILS); Coil (COILS); Coil (COILS); Coil (COILS); IPR002110 (PRINTS); IPR004087 (SMART); IPR002110 (SMART); IPR020683 (G3DSA:1.25.40.GENE3D); IPR004088 (PFAM); IPR004088 (G3DSA:3.30.1370.GENE3D); IPR020683 (G3DSA:1.25.40.GENE3D); IPR020683 (PFAM); PTHR23206 (PANTHER); CYTOPLASMIC_DOMAIN (PHOBIUS); TRANSMEMBRANE (PHOBIUS); TRANSMEMBRANE (PHOBIUS); NON_CYTOPLASMIC_DOMAIN (PHOBIUS); TRANSMEMBRANE (PHOBIUS); NON_CYTOPLASMIC_DOMAIN (PHOBIUS); CYTOPLASMIC_DOMAIN (PHOBIUS); IPR002110 (PROSITE_PROFILES); IPR004088 (PROSITE_PROFILES); IPR002110 (PROSITE_PROFILES); IPR002110 (PROSITE_PROFILES); IPR020683 (PROSITE_PROFILES); IPR002110 (PROSITE_PROFILES); IPR020683 (PROSITE_PROFILES); IPR002110 (PROSITE_PROFILES); IPR002110 (PROSITE_PROFILES); IPR002110 (PROSITE_PROFILES); IPR002110 (PROSITE_PROFILES); IPR002110 (PROSITE_PROFILES); IPR002110 (PROSITE_PROFILES); IPR020683 (SUPERFAMILY); IPR004088 (SUPERFAMILY); IPR020683 (SUPERFAMILY); TMhelix (TMHMM); TMhelix (TMHMM)                                                                                                                 |
| 1918 | c4006_g1_i1_len_142_path_255_0_141_0                                                        | 1    | papilin- partial                          | 48   | 1.48E-09  | 69.20% | 0.123 | PTHR13723 (PANTHER)<br>IPR002352 (PRINTS); IPR001304 (SMART); IPR016186 (G3DSA:3.10.100.GENE3D); IPR016186 (G3DSA:3.10.100.GENE3D); IPR001304 (PFAM); IPR016186 (G3DSA:3.10.100.GENE3D); IPR016186 (G3DSA:3.10.100.GENE3D); IPR016186 (G3DSA:3.10.100.GENE3D); PTHR22803:SF16 (PANTHER); PTHR22803 (PANTHER); IPR018378 (PROSITE_PATTERNS); IPR018378 (PROSITE_PATTERNS); IPR018378 (PROSITE_PATTERNS); IPR018378 (PROSITE_PATTERNS); IPR018378 (PROSITE_PATTERNS); IPR018378 (PROSITE_PATTERNS); NON_CYTOPLASMIC_DOMAIN (PHOBIUS); TRANSMEMBRANE (PHOBIUS); CYTOPLASMIC_DOMAIN (PHOBIUS); IPR001304 (PROSITE_PROFILES); IPR016187 (SUPERFAMILY); TMhelix (TMHMM) |
| 1919 | c40088_g1_i1_len_4640_path_4917_0_329_9_724_330_4639_3                                      | 1049 | macrophage mannose receptor 1             | 1547 | 7.61E-171 | 49.90% | 0.107 | IPR029154 (PFAM); IPR016040 (G3DSA:3.40.50.GENE3D); IPR013328 (G3DSA:1.10.1040.GENE3D); PTHR22981 (PANTHER); PTHR22981:SF7 (PANTHER); IPR008927 (SUPERFAMILY)<br>IPR002290 (SMART); G3DSA:3.30.200.20 (GENE3D); IPR000719 (PFAM); G3DSA:1.10.510.10 (GENE3D); PTHR22961:SF4 (PANTHER); IPR024104 (PANTHER); TRANSMEMBRANE (PHOBIUS); TRANSMEMBRANE (PHOBIUS); NON_CYTOPLASMIC_DOMAIN (PHOBIUS); NON_CYTOPLASMIC_DOMAIN (PHOBIUS); CYTOPLASMIC_DOMAIN (PHOBIUS); IPR000719 (PROSITE_PROFILES); IPR011009 (SUPERFAMILY)                                                                                                                                                                                                                                                                                                                                                                                                                                                                                                                                                                                                                         |
| 1920 | c40112_g5_i2_len_1078_path_1819_0_958_2_778_959_1077_0                                      | 40   | 3-hydroxyisobutyrate dehydrogenase        | 360  | 1.70E-46  | 58.60% | 0.142 | IPR015880 (SMART); PF13465 (PFAM); IPR013087 (G3DSA:3.30.160.GENE3D); IPR013087 (G3DSA:3.30.160.GENE3D); PTHR23223 (PANTHER); PTHR23223:SF21 (PANTHER); IPR007087 (PROSITE_PATTERNS); IPR007087 (PROSITE_PATTERNS); IPR007087 (PROSITE_PATTERNS); NON_CYTOPLASMIC_DOMAIN (PHOBIUS); CYTOPLASMIC_DOMAIN (PHOBIUS); TRANSMEMBRANE (PHOBIUS); TRANSMEMBRANE (PHOBIUS); TRANSMEMBRANE (PHOBIUS); NON_CYTOPLASMIC_DOMAIN (PHOBIUS); NON_CYTOPLASMIC_DOMAIN (PHOBIUS); CYTOPLASMIC_DOMAIN (PHOBIUS); IPR007087 (PROSITE_PROFILES); IPR007087 (PROSITE_PROFILES); IPR007087 (PROSITE_PROFILES); SSF57667 (SUPERFAMILY); SSF57667 (SUPERFAMILY); TMhelix (TMHMM); TMhelix (TMHMM); TMhelix (TMHMM); TMhelix (TMHMM)                                                                                                                                                                                                                                                                                                                                                                                                                                   |
| 1921 | c40113_g2_i1_len_3255_path_4435_0_992_5_424_993_1412_9954_1413_1436_567_1437_3254_5         | 769  | tribbles homolog 2                        | 1085 | 6.57E-121 | 72.20% | 0.134 |                                                                                                                                                                                                                                                                                                                                                                                                                                                                                                                                                                                                                                                                                                                                                                                                                                                                                                                                                                                                                                                                                                                                               |
| 1922 | c40121_g2_i1_len_2500_path_6961_0_118_7_974_119_125_6306_126_504_596_505_528_620_529_2499_3 | 1288 | krueppel-like factor 10                   | 834  | 2.05E-71  | 63.10% | 0.158 |                                                                                                                                                                                                                                                                                                                                                                                                                                                                                                                                                                                                                                                                                                                                                                                                                                                                                                                                                                                                                                                                                                                                               |



|      |                                                                                                               |      |                                                                      |      |           |        |        |                                                                                                                                                                                                                                                                                                                                                                                                                                                                                                                                                                                                                                                                                                                                                                                                                             |
|------|---------------------------------------------------------------------------------------------------------------|------|----------------------------------------------------------------------|------|-----------|--------|--------|-----------------------------------------------------------------------------------------------------------------------------------------------------------------------------------------------------------------------------------------------------------------------------------------------------------------------------------------------------------------------------------------------------------------------------------------------------------------------------------------------------------------------------------------------------------------------------------------------------------------------------------------------------------------------------------------------------------------------------------------------------------------------------------------------------------------------------|
| 1923 | c40137_g1_i1_len_1650_path_5096_0_3_530<br>2_4_6_3269_7_11_5894_12_29_3292_30_41<br>4_5958_415_428_39_429_1_4 | 98   | low-density lipoprotein receptor-related protein 2                   | 550  | 2.50E-33  | 49.80% | 0.143  | IPR002172 (PRINTS); IPR002172 (SMART); IPR002172 (G3DSA:4.10.400.GENE3D); IPR002172 (PFAM); IPR002172 (G3DSA:4.10.400.GENE3D); IPR002172 (G3DSA:4.10.400.GENE3D); PTHR10529 (PANTHER); IPR023415 (PROSITE_PATTERNS); IPR023415 (PROSITE_PATTERNS); IPR023415 (PROSITE_PATTERNS); TRANSMEMBRANE (PHOBIUS); NON_CYTOPLASMIC_DOMAIN (PHOBIUS); TRANSMEMBRANE (PHOBIUS); NON_CYTOPLASMIC_DOMAIN (PHOBIUS); CYTOPLASMIC_DOMAIN (PHOBIUS); IPR002172 (PROSITE_PROFILES); IPR002172 (PROSITE_PROFILES); IPR002172 (PROSITE_PROFILES); IPR002172 (PROSITE_PROFILES); IPR002172 (PROSITE_PROFILES); IPR002172 (PROSITE_PROFILES); IPR002172 (SUPERFAMILY); IPR002172 (SUPERFAMILY); IPR002172 (SUPERFAMILY); TMhelix (TMHMM); TMhelix (TMHMM)                                                                                        |
| 1924 | c40138_g1_i1_len_3814_path_3191_0_284_1<br>528_285_359_10952_360_425_3613_426_56<br>6_3138_567_2287_11073_2_4 | 600  | contactin-associated 4 isoform x1                                    | 1271 | 0         | 61.10% | 0.360Y | IPR000742 (SMART); IPR001791 (SMART); G3DSA:2.10.25.10 (GENE3D); IPR013320 (G3DSA:2.60.120.GENE3D); IPR001791 (PFAM); IPR013320 (G3DSA:2.60.120.GENE3D); G3DSA:2.10.25.10 (GENE3D); IPR013320 (G3DSA:2.60.120.GENE3D); PTHR10127:SF346 (PANTHER); PTHR10127 (PANTHER); NON_CYTOPLASMIC_DOMAIN (PHOBIUS); CYTOPLASMIC_DOMAIN (PHOBIUS); TRANSMEMBRANE (PHOBIUS); IPR000742 (PROSITE_PROFILES); IPR000742 (PROSITE_PROFILES); IPR000742 (PROSITE_PROFILES); IPR001791 (PROSITE_PROFILES); IPR001791 (PROSITE_PROFILES); IPR001791 (PROSITE_PROFILES); IPR001791 (PROSITE_PROFILES); IPR013320 (SUPERFAMILY); IPR013320 (SUPERFAMILY); IPR013320 (SUPERFAMILY); TMhelix (TMHMM)                                                                                                                                                |
| 1925 | c40151_g1_i1_len_1738_path_724_0_17_76<br>18_60_785_61_84_809_85_630_1355_631_<br>668_1393_669_1135_3         | 510  | serpin b8                                                            | 580  | 1.51E-107 | 60.50% | 0.179  | IPR023796 (SMART); IPR023796 (PFAM); G3DSA:2.30.39.10 (GENE3D); G3DSA:3.30.497.10 (GENE3D); PTHR11461:SF124 (PANTHER); IPR000215 (PANTHER); IPR023795 (PROSITE_PATTERNS); NON_CYTOPLASMIC_DOMAIN (PHOBIUS); TRANSMEMBRANE (PHOBIUS); TRANSMEMBRANE (PHOBIUS); TRANSMEMBRANE (PHOBIUS); CYTOPLASMIC_DOMAIN (PHOBIUS); NON_CYTOPLASMIC_DOMAIN (PHOBIUS); CYTOPLASMIC_DOMAIN (PHOBIUS); IPR023796 (SUPERFAMILY)                                                                                                                                                                                                                                                                                                                                                                                                                |
| 1926 | c40158_g2_i1_len_6583_path_195_0_356_55<br>2_357_1069_1264_1070_1078_150_1079_<br>2261_14788_2262_226_1       | 1653 | chromodomain-helicase-dna-binding protein mi-2<br>homolog isoform x2 | 2194 | 0         | 84.00% | 0.466Y | Coil (COILS); Coil (COILS); Coil (COILS); Coil (COILS); IPR001650 (SMART); IPR014001 (SMART); IPR001650 (PFAM); IPR009463 (PFAM); IPR000330 (PFAM); IPR027417 (G3DSA:3.40.50.GENE3D); IPR027417 (G3DSA:3.40.50.GENE3D); IPR009462 (PFAM); IPR012957 (PFAM); PTHR10799 (PANTHER); PTHR10799:SF460 (PANTHER); IPR002464 (PROSITE_PATTERNS); SIGNAL_PEPTIDE (PHOBIUS); NON_CYTOPLASMIC_DOMAIN (PHOBIUS); TRANSMEMBRANE (PHOBIUS); NON_CYTOPLASMIC_DOMAIN (PHOBIUS); SIGNAL_PEPTIDE_N_REGION (PHOBIUS); SIGNAL_PEPTIDE_H_REGION (PHOBIUS); SIGNAL_PEPTIDE_C_REGION (PHOBIUS); CYTOPLASMIC_DOMAIN (PHOBIUS); TRANSMEMBRANE (PHOBIUS); IPR001650 (PROSITE_PROFILES); IPR014001 (PROSITE_PROFILES); SignalP-noTM (SIGNALP_EUK); IPR027417 (SUPERFAMILY); IPR027417 (SUPERFAMILY)                                                   |
| 1927 | c40158_g2_i2_len_6619_path_195_0_356_55<br>2_357_1069_1264_1070_1078_150_1079_<br>2261_2455_2262_6_0          | 1675 | chromodomain-helicase-dna-binding protein mi-2<br>homolog isoform x5 | 2207 | 0         | 79.70% | 0.133  | Coil (COILS); Coil (COILS); Coil (COILS); Coil (COILS); Coil (COILS); IPR001965 (SMART); IPR000953 (SMART); IPR001650 (SMART); IPR014001 (SMART); IPR027417 (G3DSA:3.40.50.GENE3D); IPR013083 (G3DSA:3.30.40.GENE3D); IPR027417 (G3DSA:3.40.50.GENE3D); IPR023780 (PFAM); IPR012958 (PFAM); IPR009463 (PFAM); IPR001650 (PFAM); G3DSA:2.40.50.40 (GENE3D); IPR019787 (PFAM); IPR000330 (PFAM); IPR012957 (PFAM); IPR009462 (PFAM); PTHR10799 (PANTHER); PTHR10799:SF460 (PANTHER); IPR002464 (PROSITE_PATTERNS); IPR019787 (PROSITE_PROFILES); IPR014001 (PROSITE_PROFILES); IPR019787 (PROSITE_PROFILES); IPR001650 (PROSITE_PROFILES); IPR000953 (PROSITE_PROFILES); IPR011011 (SUPERFAMILY); IPR011011 (SUPERFAMILY); IPR027417 (SUPERFAMILY); IPR027417 (SUPERFAMILY); IPR016197 (SUPERFAMILY); IPR016197 (SUPERFAMILY) |

|      |                                                                                                   |      |                                                                      |      |   |        |       |                                                                                                                                                                                                                                                                                                                                                                                                                                                                                                                                                                                                                                                                                                                                                                                                                                                                                                                      |
|------|---------------------------------------------------------------------------------------------------|------|----------------------------------------------------------------------|------|---|--------|-------|----------------------------------------------------------------------------------------------------------------------------------------------------------------------------------------------------------------------------------------------------------------------------------------------------------------------------------------------------------------------------------------------------------------------------------------------------------------------------------------------------------------------------------------------------------------------------------------------------------------------------------------------------------------------------------------------------------------------------------------------------------------------------------------------------------------------------------------------------------------------------------------------------------------------|
| 1928 | c40158_g2_i3_len_6650_path_195_0_356_55<br>2_357_1069_1264_1070_1078_150_1079_2261_2455_2262_6_0  | 1663 | chromodomain-helicase-dna-binding protein mi-2<br>homolog isoform x5 | 2217 | 0 | 79.50% | 0.133 | Coil (COILS); Coil (COILS); Coil (COILS); Coil (COILS); Coil (COILS); IPR000953 (SMART); IPR014001 (SMART); IPR001650 (SMART); IPR001965 (SMART); G3DSA:2.40.50.40 (GENE3D); IPR023780 (PFAM); IPR001650 (PFAM); IPR013083 (G3DSA:3.30.40.GENE3D); IPR012957 (PFAM); IPR027417 (G3DSA:3.40.50.GENE3D); IPR009462 (PFAM); IPR027417 (G3DSA:3.40.50.GENE3D); IPR019787 (PFAM); IPR012958 (PFAM); IPR009463 (PFAM); IPR000330 (PFAM); PTHR10799 (PANTHER); PTHR10799:SF460 (PANTHER); IPR002464 (PROSITE_PATTERNS); IPR019787 (PROSITE_PROFILES); IPR000953 (PROSITE_PROFILES); IPR001650 (PROSITE_PROFILES); IPR014001 (PROSITE_PROFILES); IPR019787 (PROSITE_PROFILES); IPR027417 (SUPERFAMILY); IPR011011 (SUPERFAMILY); IPR016197 (SUPERFAMILY); IPR016197 (SUPERFAMILY); IPR027417 (SUPERFAMILY); IPR011011 (SUPERFAMILY)                                                                                          |
| 1929 | c40158_g2_i4_len_6689_path_195_0_356_55<br>2_357_1069_1264_1070_1078_150_1079_2261_2455_2262_6_0  | 1704 | chromodomain-helicase-dna-binding protein mi-2<br>homolog isoform x5 | 2230 | 0 | 79.50% | 0.133 | Coil (COILS); Coil (COILS); Coil (COILS); Coil (COILS); Coil (COILS); IPR014001 (SMART); IPR001965 (SMART); IPR001650 (SMART); IPR000953 (SMART); IPR027417 (G3DSA:3.40.50.GENE3D); IPR000330 (PFAM); IPR013083 (G3DSA:3.30.40.GENE3D); IPR023780 (PFAM); IPR027417 (G3DSA:3.40.50.GENE3D); IPR012958 (PFAM); IPR009463 (PFAM); IPR012957 (PFAM); IPR009462 (PFAM); IPR001650 (PFAM); IPR019787 (PFAM); G3DSA:2.40.50.40 (GENE3D); PTHR10799 (PANTHER); PTHR10799:SF460 (PANTHER); IPR002464 (PROSITE_PATTERNS); TRANSMEMBRANE (PHOBIUS); CYTOPLASMIC_DOMAIN (PHOBIUS); NON_CYTOPLASMIC_DOMAIN (PHOBIUS); IPR014001 (PROSITE_PROFILES); IPR019787 (PROSITE_PROFILES); IPR000953 (PROSITE_PROFILES); IPR001650 (PROSITE_PROFILES); IPR019787 (PROSITE_PROFILES); IPR011011 (SUPERFAMILY); IPR016197 (SUPERFAMILY); IPR027417 (SUPERFAMILY); IPR011011 (SUPERFAMILY); IPR016197 (SUPERFAMILY); IPR027417 (SUPERFAMILY) |
| 1930 | c40158_g2_i5_len_6726_path_195_0_356_55<br>2_357_1069_1264_1070_1078_150_1079_2261_2455_2262_6_0  | 1704 | chromodomain-helicase-dna-binding protein mi-2<br>homolog isoform x5 | 2242 | 0 | 79.50% | 0.133 | Coil (COILS); Coil (COILS); Coil (COILS); Coil (COILS); Coil (COILS); IPR000953 (SMART); IPR014001 (SMART); IPR001965 (SMART); IPR001650 (SMART); G3DSA:2.40.50.40 (GENE3D); IPR027417 (G3DSA:3.40.50.GENE3D); IPR001650 (PFAM); IPR023780 (PFAM); IPR009463 (PFAM); IPR013083 (G3DSA:3.30.40.GENE3D); IPR000330 (PFAM); IPR009462 (PFAM); IPR012958 (PFAM); IPR012957 (PFAM); IPR027417 (G3DSA:3.40.50.GENE3D); IPR019787 (PFAM); PTHR10799 (PANTHER); PTHR10799:SF460 (PANTHER); IPR002464 (PROSITE_PATTERNS); IPR019787 (PROSITE_PROFILES); IPR019787 (PROSITE_PROFILES); IPR000953 (PROSITE_PROFILES); IPR014001 (PROSITE_PROFILES); IPR001650 (PROSITE_PROFILES); IPR016197 (SUPERFAMILY); IPR027417 (SUPERFAMILY); IPR011011 (SUPERFAMILY); IPR016197 (SUPERFAMILY); IPR027417 (SUPERFAMILY); IPR011011 (SUPERFAMILY)                                                                                          |
| 1931 | c40174_g1_i1_len_3531_path_4461_0_77_91<br>0_78_2850_266_2851_2871_408_2872_353_0_1               | 1745 | c-1-tetrahydrofolate cytoplasmic                                     | 1177 | 0 | 83.30% | 0.202 | Coil (COILS); IPR000672 (PRINTS); IPR020631 (PFAM); G3DSA:3.30.1510.10 (GENE3D); G3DSA:3.10.410.10 (GENE3D); G3DSA:3.40.192.10 (GENE3D); IPR016040 (G3DSA:3.40.50.GENE3D); IPR000559 (PFAM); IPR027417 (G3DSA:3.40.50.GENE3D); IPR020630 (PFAM); PTHR10025 (PANTHER); IPR020867 (PROSITE_PATTERNS); IPR020867 (PROSITE_PATTERNS); IPR020628 (PROSITE_PATTERNS); IPR020628 (PROSITE_PATTERNS); TRANSMEMBRANE (PHOBIUS); NON_CYTOPLASMIC_DOMAIN (PHOBIUS); CYTOPLASMIC_DOMAIN (PHOBIUS); IPR000559 (HAMAP); IPR000672 (HAMAP); SSF51735 (SUPERFAMILY); SSF53223 (SUPERFAMILY); IPR027417 (SUPERFAMILY)                                                                                                                                                                                                                                                                                                                 |
| 1932 | c40174_g1_i2_len_3639_path_4461_0_77_91<br>0_78_2850_158_2851_2958_266_2959_297_9_408_2980_3638_1 | 1709 | c-1-tetrahydrofolate cytoplasmic                                     | 1213 | 0 | 80.00% | 0.202 | Coil (COILS); IPR000672 (PRINTS); IPR016040 (G3DSA:3.40.50.GENE3D); IPR020631 (PFAM); IPR020630 (PFAM); IPR027417 (G3DSA:3.40.50.GENE3D); G3DSA:3.40.192.10 (GENE3D); G3DSA:3.10.410.10 (GENE3D); G3DSA:3.30.1510.10 (GENE3D); IPR000559 (PFAM); PTHR10025 (PANTHER); IPR020628 (PROSITE_PATTERNS); IPR020867 (PROSITE_PATTERNS); IPR020867 (PROSITE_PATTERNS); IPR020628 (PROSITE_PATTERNS); TRANSMEMBRANE (PHOBIUS); CYTOPLASMIC_DOMAIN (PHOBIUS); NON_CYTOPLASMIC_DOMAIN (PHOBIUS); IPR000559 (HAMAP); IPR000672 (HAMAP); SSF53223 (SUPERFAMILY); IPR027417 (SUPERFAMILY); SSF51735 (SUPERFAMILY)                                                                                                                                                                                                                                                                                                                 |

|      |                                                                                                       |      |                                                                  |      |           |        |         |                                                                                                                                                                                                                                                                                                                                                                                                                                                                                                                                                                                                                                                              |
|------|-------------------------------------------------------------------------------------------------------|------|------------------------------------------------------------------|------|-----------|--------|---------|--------------------------------------------------------------------------------------------------------------------------------------------------------------------------------------------------------------------------------------------------------------------------------------------------------------------------------------------------------------------------------------------------------------------------------------------------------------------------------------------------------------------------------------------------------------------------------------------------------------------------------------------------------------|
| 1933 | c40174_g1_i3_len_3702_path_661_0_248_91_0_249_3021_387_3022_3042_408_3043_3701_1                      | 1660 | c-1-tetrahydrofolate cytoplasmic                                 | 1234 | 0         | 83.30% | 0.198   | Coil (COILS); IPR000672 (PRINTS); G3DSA:3.30.1510.10 (GENE3D); G3DSA:3.10.410.10 (GENE3D); IPR016040 (G3DSA:3.40.50.GENE3D); IPR020631 (PFAM); IPR020630 (PFAM); IPR027417 (G3DSA:3.40.50.GENE3D); IPR000559 (PFAM); G3DSA:3.40.192.10 (GENE3D); PTHR10025 (PANTHER); IPR020867 (PROSITE_PATTERNS); IPR020628 (PROSITE_PATTERNS); IPR020628 (PROSITE_PATTERNS); IPR020867 (PROSITE_PATTERNS); CYTOPLASMIC_DOMAIN (PHOBIUS); TRANSMEMBRANE (PHOBIUS); NON_CYTOPLASMIC_DOMAIN (PHOBIUS); IPR000672 (HAMAP); IPR000559 (HAMAP); IPR027417 (SUPERFAMILY); SSF51735 (SUPERFAMILY); SSF53223 (SUPERFAMILY)                                                         |
| 1934 | c40176_g1_i2_len_2341_path_4818_0_189_8004_190_246_5063_247_328_5145_329_362_8172_363_364_5180_365_5  | 140  | PREDICTED: uncharacterized protein LOC103578371 isoform X4       | 780  | 3.48E-10  | 51.20% | 0.496Y  | IPR002172 (PRINTS); IPR003609 (SMART); IPR002172 (SMART); IPR002172 (PFAM); G3DSA:3.50.4.10 (GENE3D); IPR002172 (G3DSA:4.10.400.GENE3D); G3DSA:3.50.4.10 (GENE3D); IPR003014 (PFAM); IPR002172 (G3DSA:4.10.400.GENE3D); PTHR10529 (PANTHER); IPR023415 (PROSITE_PATTERNS); CYTOPLASMIC_DOMAIN (PHOBIUS); TRANSMEMBRANE (PHOBIUS); NON_CYTOPLASMIC_DOMAIN (PHOBIUS); IPR003609 (PROSITE_PROFILES); IPR002172 (PROSITE_PROFILES); IPR003609 (PROSITE_PROFILES); IPR003609 (PROSITE_PROFILES); IPR002172 (PROSITE_PROFILES); IPR003609 (PROSITE_PROFILES); SignalP-noTM (SIGNALP_EUK); IPR002172 (SUPERFAMILY); SSF57414 (SUPERFAMILY); IPR002172 (SUPERFAMILY) |
| 1935 | c40176_g2_i1_len_902_path_7297_0_99_7396_100_116_6840_117_319_5145_320_353_8172_354_355_7821_356_51_3 | 39   | serine protease p153                                             | 301  | 2.89E-09  | 50.10% | 0.111   | IPR002172 (SMART); IPR002172 (G3DSA:4.10.400.GENE3D); IPR003014 (PFAM); G3DSA:3.50.4.10 (GENE3D); IPR002172 (PFAM); IPR002172 (PROSITE_PROFILES); IPR003609 (PROSITE_PROFILES); IPR003609 (PROSITE_PROFILES); IPR002172 (SUPERFAMILY)                                                                                                                                                                                                                                                                                                                                                                                                                        |
| 1936 | c40176_g3_i1_len_153_path_3681_0_102_8186_103_113_5324_114_126_5337_127_138_8206_139_152_3            | 1    | ---NA---                                                         | 51   |           |        | 0.104   | IPR002172 (SMART); IPR002172 (PFAM); IPR002172 (G3DSA:4.10.400.GENE3D); IPR023415 (PROSITE_PATTERNS); IPR002172 (PROSITE_PROFILES); IPR002172 (SUPERFAMILY)                                                                                                                                                                                                                                                                                                                                                                                                                                                                                                  |
| 1937 | c40179_g1_i1_len_2459_path_2905_0_121_3027_122_219_3125_220_270_3175_271_566_3466_567_816_275_81_5    | 225  | ectonucleotide pyrophosphatase phosphodiesterase family member 6 | 819  | 1.34E-105 | 54.80% | 0.355 Y | Coil (COILS); IPR002591 (PFAM); IPR017849 (G3DSA:3.40.720.GENE3D); IPR024873 (PANTHER); CYTOPLASMIC_DOMAIN (PHOBIUS); TRANSMEMBRANE (PHOBIUS); NON_CYTOPLASMIC_DOMAIN (PHOBIUS); IPR017850 (SUPERFAMILY)                                                                                                                                                                                                                                                                                                                                                                                                                                                     |
| 1938 | c40179_g1_i2_len_2454_path_2905_0_121_8748_122_122_3027_123_220_3125_221_271_3175_272_567_3466_568_5  | 211  | ectonucleotide pyrophosphatase phosphodiesterase family member 6 | 818  | 7.05E-106 | 54.60% | 0.355 Y | IPR017849 (G3DSA:3.40.720.GENE3D); IPR002591 (PFAM); IPR024873 (PANTHER); CYTOPLASMIC_DOMAIN (PHOBIUS); TRANSMEMBRANE (PHOBIUS); NON_CYTOPLASMIC_DOMAIN (PHOBIUS); TRANSMEMBRANE (PHOBIUS); CYTOPLASMIC_DOMAIN (PHOBIUS); TRANSMEMBRANE (PHOBIUS); NON_CYTOPLASMIC_DOMAIN (PHOBIUS); IPR017850 (SUPERFAMILY)                                                                                                                                                                                                                                                                                                                                                 |
| 1939 | c40179_g2_i1_len_954_path_5600_0_144_3125_145_195_575_196_953_5                                       | 36   | ectonucleotide pyrophosphatase phosphodiesterase family member 6 | 318  | 2.75E-71  | 54.50% | 0.128   | IPR002591 (PFAM); IPR017849 (G3DSA:3.40.720.GENE3D); IPR024873 (PANTHER); CYTOPLASMIC_DOMAIN (PHOBIUS); NON_CYTOPLASMIC_DOMAIN (PHOBIUS); TRANSMEMBRANE (PHOBIUS); IPR017850 (SUPERFAMILY)                                                                                                                                                                                                                                                                                                                                                                                                                                                                   |
| 1940 | c40181_g1_i1_len_302_path_2634_0_33_2667_34_68_2203_69_81_2714_82_116_503_117_181_568_182_301_2       | 73   | hypothetical protein LOTGIDRAFT_133595                           | 100  | 5.74E-06  | 72.00% | 0.096   | PF14704 (PFAM); NON_CYTOPLASMIC_DOMAIN (PHOBIUS); TRANSMEMBRANE (PHOBIUS); CYTOPLASMIC_DOMAIN (PHOBIUS)                                                                                                                                                                                                                                                                                                                                                                                                                                                                                                                                                      |
| 1941 | c40181_g2_i1_len_548_path_259_0_59_31960_111_1355_112_140_3685_141_165_415_166_179_429_180_233_205_3  | 93   | hemagglutinin amebocyte aggregation factor-like                  | 183  | 2.91E-26  | 58.80% | 0.393 Y | PF14704 (PFAM); IPR026645 (PANTHER); TRANSMEMBRANE (PHOBIUS); SIGNAL_PEPTIDE_N_REGION (PHOBIUS); CYTOPLASMIC_DOMAIN (PHOBIUS); SIGNAL_PEPTIDE (PHOBIUS); NON_CYTOPLASMIC_DOMAIN (PHOBIUS); SIGNAL_PEPTIDE_H_REGION (PHOBIUS); SIGNAL_PEPTIDE_C_REGION (PHOBIUS); TMhelix (TMHMM)                                                                                                                                                                                                                                                                                                                                                                             |
| 1942 | c40181_g2_i2_len_410_path_1264_0_8_12739_39_319_40_91_1355_92_120_3685_121_145_1408_146_159_429_16_5  | 105  | hemagglutinin amebocyte aggregation factor-like                  | 136  | 3.63E-24  | 59.80% | 0.213   | PF14704 (PFAM); IPR026645 (PANTHER)                                                                                                                                                                                                                                                                                                                                                                                                                                                                                                                                                                                                                          |
| 1943 | c40207_g1_i1_len_2079_path_2375_0_153_2528_154_204_202_205_849_91_850_1004_3376_1005_1016_3388_1017_3 | 848  | probable cytochrome p450 49a1                                    | 693  | 2.50E-143 | 62.70% | 0.14    | IPR001128 (PRINTS); IPR002401 (PRINTS); IPR001128 (PFAM); IPR001128 (G3DSA:1.10.630.GENE3D); PTHR24305 (PANTHER); PTHR24305:SF49 (PANTHER); IPR017972 (PROSITE_PATTERNS); IPR001128 (SUPERFAMILY)                                                                                                                                                                                                                                                                                                                                                                                                                                                            |

|      |                                                                                                      |      |                                                        |      |           |        |         |                                                                                                                                                                                                                                                                                                                                                                                                                                                                                                                                                                                                                                                                |
|------|------------------------------------------------------------------------------------------------------|------|--------------------------------------------------------|------|-----------|--------|---------|----------------------------------------------------------------------------------------------------------------------------------------------------------------------------------------------------------------------------------------------------------------------------------------------------------------------------------------------------------------------------------------------------------------------------------------------------------------------------------------------------------------------------------------------------------------------------------------------------------------------------------------------------------------|
| 1944 | c40209_g1_i1_len_2111_path_2089_0_756_2_846_757_758_2848_759_2110_4                                  | 1686 | leucine-rich repeat neuronal protein 3-like isoform x1 | 704  | 1.48E-105 | 54.80% | 0.194   | IPR000483 (SMART); IPR003591 (SMART); G3DSA:3.80.10.10 (GENE3D); G3DSA:3.80.10.10 (GENE3D); IPR001611 (PFAM); PTHR24373 (PANTHER); CYTOPLASMIC_DOMAIN (PHOBIUS); TRANSMEMBRANE (PHOBIUS); CYTOPLASMIC_DOMAIN (PHOBIUS); TRANSMEMBRANE (PHOBIUS); NON_CYTOPLASMIC_DOMAIN (PHOBIUS); IPR001611 (PROSITE_PROFILES); IPR001611 (PROSITE_PROFILES); IPR001611 (PROSITE_PROFILES); IPR001611 (PROSITE_PROFILES); IPR001611 (PROSITE_PROFILES); IPR001611 (PROSITE_PROFILES); SSF52058 (SUPERFAMILY); TMhelix (TMHMM); TMhelix (TMHMM)                                                                                                                                |
| 1945 | c40211_g1_i1_len_3204_path_173_0_206_38_0_207_207_381_208_1839_2010_1840_184_9_147_1850_3203_3       | 423  | peroxinectin                                           | 1068 | 0         | 62.00% | 0.16    | IPR019791 (PRINTS); IPR019791 (G3DSA:1.10.640.GENE3D); IPR019791 (PFAM); PTHR11475 (PANTHER); NON_CYTOPLASMIC_DOMAIN (PHOBIUS); CYTOPLASMIC_DOMAIN (PHOBIUS); TRANSMEMBRANE (PHOBIUS); IPR019791 (PROSITE_PROFILES); IPR010255 (SUPERFAMILY); TMhelix (TMHMM)                                                                                                                                                                                                                                                                                                                                                                                                  |
| 1946 | c40216_g2_i1_len_1607_path_2095_0_1558_3646_1559_1598_7603_1599_1606_1                               | 466  | di-n-acetylchitobiase                                  | 536  | 5.71E-94  | 59.40% | 0.341 Y | IPR011583 (SMART); IPR001223 (PFAM); IPR013781 (G3DSA:3.20.20.GENE3D); PTHR11177 (PANTHER); PTHR11177:SF146 (PANTHER); IPR001579 (PROSITE_PATTERNS); TRANSMEMBRANE (PHOBIUS); TRANSMEMBRANE (PHOBIUS); CYTOPLASMIC_DOMAIN (PHOBIUS); NON_CYTOPLASMIC_DOMAIN (PHOBIUS); NON_CYTOPLASMIC_DOMAIN (PHOBIUS); IPR017853 (SUPERFAMILY); TMhelix (TMHMM)                                                                                                                                                                                                                                                                                                              |
| 1947 | c40218_g1_i1_len_1138_path_1456_0_111_1_567_112_118_84_119_952_2883_953_964_2417_965_1054_3103_10_4  | 143  | marginal zone b- and b1-cell-specific                  | 379  | 1.37E-43  | 56.20% | 0.202   | PTHR15881:SF1 (PANTHER); PTHR15881 (PANTHER)                                                                                                                                                                                                                                                                                                                                                                                                                                                                                                                                                                                                                   |
| 1948 | c40218_g1_i2_len_1131_path_1456_0_111_1_567_112_118_84_119_952_2883_953_964_2417_965_1054_2696_10_3  | 145  | marginal zone b- and b1-cell-specific protein          | 377  | 1.13E-43  | 55.90% | 0.237   | PTHR15881 (PANTHER); PTHR15881:SF1 (PANTHER)                                                                                                                                                                                                                                                                                                                                                                                                                                                                                                                                                                                                                   |
| 1949 | c40218_g1_i3_len_1151_path_1456_0_111_1_567_112_118_84_119_952_2405_953_964_2417_965_1054_3103_10_5  | 161  | marginal zone b- and b1-cell-specific                  | 383  | 9.75E-43  | 56.40% | 0.182   | PTHR15881 (PANTHER); PTHR15881:SF1 (PANTHER)                                                                                                                                                                                                                                                                                                                                                                                                                                                                                                                                                                                                                   |
| 1950 | c40222_g1_i1_len_1743_path_259_0_1041_4_652_1042_1042_1299_1043_1239_1495_124_0_1251_141_1252_1742_0 | 1189 | hypothetical protein CHLREDRAFT_179663                 | 581  | 8.60E-18  | 39.33% | 0.371 Y | Coil (COILS); IPR006796 (PFAM); CYTOPLASMIC_DOMAIN (PHOBIUS); TRANSMEMBRANE (PHOBIUS); CYTOPLASMIC_DOMAIN (PHOBIUS); TRANSMEMBRANE (PHOBIUS); CYTOPLASMIC_DOMAIN (PHOBIUS); NON_CYTOPLASMIC_DOMAIN (PHOBIUS); TRANSMEMBRANE (PHOBIUS); CYTOPLASMIC_DOMAIN (PHOBIUS); TRANSMEMBRANE (PHOBIUS); NON_CYTOPLASMIC_DOMAIN (PHOBIUS); TRANSMEMBRANE (PHOBIUS); PD936484 (PRODOM); TMhelix (TMHMM); TMhelix (TMHMM); TMhelix (TMHMM); TMhelix (TMHMM); TMhelix (TMHMM); TMhelix (TMHMM)                                                                                                                                                                               |
| 1951 | c40224_g1_i1_len_2314_path_3630_0_2313_1                                                             | 801  | chitinase 2                                            | 771  | 5.19E-130 | 57.20% | 0.106   | IPR011583 (SMART); IPR002557 (SMART); IPR002557 (G3DSA:2.170.140.GENE3D); IPR001223 (PFAM); IPR013781 (G3DSA:3.20.20.GENE3D); IPR002557 (PFAM); IPR029070 (G3DSA:3.10.50.GENE3D); PTHR11177:SF112 (PANTHER); PTHR11177 (PANTHER); IPR001579 (PROSITE_PATTERNS); TRANSMEMBRANE (PHOBIUS); CYTOPLASMIC_DOMAIN (PHOBIUS); TRANSMEMBRANE (PHOBIUS); NON_CYTOPLASMIC_DOMAIN (PHOBIUS); TRANSMEMBRANE (PHOBIUS); NON_CYTOPLASMIC_DOMAIN (PHOBIUS); IPR002557 (PROSITE_PROFILES); IPR002557 (PROSITE_PROFILES); IPR029070 (SUPERFAMILY); IPR017853 (SUPERFAMILY); IPR002557 (SUPERFAMILY); IPR002557 (SUPERFAMILY); TMhelix (TMHMM); TMhelix (TMHMM); TMhelix (TMHMM) |
| 1952 | c40229_g1_i1_len_3064_path_102_0_45_148_46_2235_6654_2236_3063_0                                     | 1703 | protein ambp                                           | 1022 | 7.47E-27  | 55.20% | 0.128   | IPR002223 (PRINTS); IPR002223 (SMART); IPR002223 (G3DSA:4.10.410.GENE3D); IPR002223 (PFAM); IPR002223 (G3DSA:4.10.410.GENE3D); PTHR10083 (PANTHER); IPR020901 (PROSITE_PATTERNS); IPR020901 (PROSITE_PATTERNS); CYTOPLASMIC_DOMAIN (PHOBIUS); NON_CYTOPLASMIC_DOMAIN (PHOBIUS); TRANSMEMBRANE (PHOBIUS); IPR002223 (PROSITE_PROFILES); IPR002223 (PROSITE_PROFILES); IPR002223 (SUPERFAMILY); IPR002223 (SUPERFAMILY); TMhelix (TMHMM)                                                                                                                                                                                                                         |

|      |                                                                                                         |      |                                                           |      |          |        |         |                                                                                                                                                                                                                                                                                                                                                                                                                                                                                                         |
|------|---------------------------------------------------------------------------------------------------------|------|-----------------------------------------------------------|------|----------|--------|---------|---------------------------------------------------------------------------------------------------------------------------------------------------------------------------------------------------------------------------------------------------------------------------------------------------------------------------------------------------------------------------------------------------------------------------------------------------------------------------------------------------------|
| 1953 | c40229_g1_i2_len_3071_path_149_0_52_148_53_2242_6654_2243_3070_1                                        | 1798 | protein ambp                                              | 1024 | 7.44E-27 | 55.30% | 0.146   | IPR002223 (PRINTS); IPR002223 (SMART); IPR002223 (G3DSA:4.10.410.GENE3D); IPR002223 (G3DSA:4.10.410.GENE3D); IPR002223 (PFAM); PTHR10083 (PANTHER); IPR020901 (PROSITE_PATTERNS); IPR020901 (PROSITE_PATTERNS); NON_CYTOPLASMIC_DOMAIN (PHOBIUS); TRANSMEMBRANE (PHOBIUS); CYTOPLASMIC_DOMAIN (PHOBIUS); IPR002223 (PROSITE_PROFILES); IPR002223 (PROSITE_PROFILES); IPR002223 (SUPERFAMILY); IPR002223 (SUPERFAMILY); TMhelix (TMHMM)                                                                  |
| 1954 | c40230_g1_i1_len_2981_path_6288_0_14_67_09_15_33_6728_34_2766_2754_2767_2780_6842_2781_2801_6578_280_5  | 951  | hemocyte protein-glutamine gamma-glutamyltransferase-like | 993  | 0        | 67.80% | 0.101   | Coil (COILS); IPR002931 (SMART); IPR002931 (PFAM); IPR002931 (G3DSA:3.90.260.GENE3D); IPR013783 (G3DSA:2.60.40.GENE3D); IPR001102 (PFAM); IPR013783 (G3DSA:2.60.40.GENE3D); IPR008958 (PFAM); IPR013783 (G3DSA:2.60.40.GENE3D); PTHR11590:SF40 (PANTHER); IPR023608 (PANTHER); IPR013808 (PROSITE_PATTERNS); NON_CYTOPLASMIC_DOMAIN (PHOBIUS); CYTOPLASMIC_DOMAIN (PHOBIUS); TRANSMEMBRANE (PHOBIUS); SSF54001 (SUPERFAMILY); IPR008958 (SUPERFAMILY); IPR008958 (SUPERFAMILY); IPR014756 (SUPERFAMILY) |
| 1955 | c40233_g1_i1_len_1357_path_827_0_160_98_7_161_253_224_254_278_1101_279_280_54_281_373_1193_374_378_0    | 152  | squamous cell carcinoma antigen 2                         | 453  | 7.94E-77 | 53.40% | 0.335   | IPR023796 (SMART); G3DSA:2.30.39.10 (GENE3D); IPR023796 (PFAM); G3DSA:3.30.497.10 (GENE3D); IPR000215 (PANTHER); IPR023795 (PROSITE_PATTERNS); IPR023796 (SUPERFAMILY)                                                                                                                                                                                                                                                                                                                                  |
| 1956 | c40233_g1_i2_len_1217_path_827_0_160_98_7_161_253_224_254_278_1101_279_280_54_281_373_1193_374_378_0    | 140  | serine proteinase inhibitor b3                            | 406  | 5.24E-76 | 53.60% | 0.335   | IPR023796 (SMART); G3DSA:3.30.497.10 (GENE3D); IPR023796 (PFAM); G3DSA:2.30.39.10 (GENE3D); IPR000215 (PANTHER); IPR023795 (PROSITE_PATTERNS); IPR023796 (SUPERFAMILY)                                                                                                                                                                                                                                                                                                                                  |
| 1957 | c40236_g1_i1_len_1698_path_6046_0_32_98_13_33_34_27_35_69_9842_70_132_7803_13_3_156_7827_157_168_6208_1 | 1860 | factor d-like protein                                     | 566  | 2.56E-79 | 50.80% | 0.112   | IPR001314 (PRINTS); IPR001254 (SMART); G3DSA:2.40.10.10 (GENE3D); IPR001254 (PFAM); G3DSA:2.40.10.10 (GENE3D); G3DSA:2.40.10.10 (GENE3D); PTHR24268:SF95 (PANTHER); PTHR24268 (PANTHER); IPR018114 (PROSITE_PATTERNS); IPR001254 (PROSITE_PROFILES); IPR009003 (SUPERFAMILY)                                                                                                                                                                                                                            |
| 1958 | c40237_g1_i12_len_1589_path_4829_0_625_5455_626_816_4828_817_912_9661_913_91_5_5742_916_1077_5904_10_3  | 756  | aspartyl asparaginyl beta-hydroxylase                     | 530  | 1.02E-13 | 69.80% | 0.222   | Coil (COILS); NON_CYTOPLASMIC_DOMAIN (PHOBIUS); TRANSMEMBRANE (PHOBIUS); TRANSMEMBRANE (PHOBIUS); CYTOPLASMIC_DOMAIN (PHOBIUS); NON_CYTOPLASMIC_DOMAIN (PHOBIUS); TRANSMEMBRANE (PHOBIUS); CYTOPLASMIC_DOMAIN (PHOBIUS); TMhelix (TMHMM); TMhelix (TMHMM)                                                                                                                                                                                                                                               |
| 1959 | c40237_g1_i7_len_1436_path_4829_0_625_5455_626_816_4828_817_912_9661_913_915_5742_916_1077_6057_107_3   | 570  | glutamic acid-rich protein                                | 479  | 2.58E-07 | 61.00% | 0.222   | Coil (COILS); CYTOPLASMIC_DOMAIN (PHOBIUS); NON_CYTOPLASMIC_DOMAIN (PHOBIUS); CYTOPLASMIC_DOMAIN (PHOBIUS); NON_CYTOPLASMIC_DOMAIN (PHOBIUS); TRANSMEMBRANE (PHOBIUS); TRANSMEMBRANE (PHOBIUS); TRANSMEMBRANE (PHOBIUS); TMhelix (TMHMM); TMhelix (TMHMM)                                                                                                                                                                                                                                               |
| 1960 | c40238_g1_i2_len_924_path_869_0_188_105_8_189_232_1102_233_248_851_249_257_11_26_258_263_5963_264_274_4 | 683  | ---NA---                                                  | 308  |          |        | 0.620 Y | IPR008197 (PRINTS); IPR008197 (SMART); IPR008197 (G3DSA:4.10.75.GENE3D); IPR008197 (PFAM); NON_CYTOPLASMIC_DOMAIN (PHOBIUS); SIGNAL_PEPTIDE (PHOBIUS); SIGNAL_PEPTIDE_H_REGION (PHOBIUS); SIGNAL_PEPTIDE_C_REGION (PHOBIUS); SIGNAL_PEPTIDE_N_REGION (PHOBIUS); IPR008197 (PROSITE_PROFILES); IPR008197 (PROSITE_PROFILES); SignalIP-TM (SIGNALP_EUK); IPR008197 (SUPERFAMILY); TMhelix (TMHMM)                                                                                                         |
| 1961 | c40238_g1_i4_len_1095_path_5072_0_366_5436_367_389_558_390_541_1058_542_585_5935_586_619_5963_620_6_5   | 333  | hypothetical protein LOTGIDRAFT_159529                    | 365  | 2.03E-07 | 68.00% | 0.259   | IPR008197 (PRINTS); IPR008197 (SMART); IPR008197 (G3DSA:4.10.75.GENE3D); IPR008197 (PFAM); NON_CYTOPLASMIC_DOMAIN (PHOBIUS); TRANSMEMBRANE (PHOBIUS); NON_CYTOPLASMIC_DOMAIN (PHOBIUS); CYTOPLASMIC_DOMAIN (PHOBIUS); TRANSMEMBRANE (PHOBIUS); IPR008197 (PROSITE_PROFILES); IPR008197 (SUPERFAMILY); TMhelix (TMHMM)                                                                                                                                                                                   |
| 1962 | c40256_g2_i1_len_2522_path_561_0_2521_2                                                                 | 951  | beta-galactosidase-1-like protein 2                       | 840  | 0        | 61.10% | 0.151   | IPR001944 (PRINTS); IPR001944 (PFAM); IPR008979 (G3DSA:2.60.120.GENE3D); IPR013781 (G3DSA:3.20.20.GENE3D); PTHR23421:SF66 (PANTHER); IPR001944 (PANTHER); IPR019801 (PROSITE_PATTERNS); IPR008979 (SUPERFAMILY); IPR017853 (SUPERFAMILY)                                                                                                                                                                                                                                                                |



|      |                                                                                             |      |                                                |      |           |        |        |                                                                                                                                                                                                                                                                                                                                                                                                                                                                                                                                                                                                                                                                                                                                                                                                                                                                                                 |
|------|---------------------------------------------------------------------------------------------|------|------------------------------------------------|------|-----------|--------|--------|-------------------------------------------------------------------------------------------------------------------------------------------------------------------------------------------------------------------------------------------------------------------------------------------------------------------------------------------------------------------------------------------------------------------------------------------------------------------------------------------------------------------------------------------------------------------------------------------------------------------------------------------------------------------------------------------------------------------------------------------------------------------------------------------------------------------------------------------------------------------------------------------------|
| 1963 | c40260_g1_i1_len_4835_path_5572_0_1205_516_1206_4834_2                                      | 2080 | I-aminoadipate-semialdehyde dehydrogenase-like | 1611 | 0         | 67.70% | 0.106  | IPR002347 (PRINTS); IPR002198 (PRINTS); IPR013968 (SMART); IPR013120 (PFAM); G3DSA:3.40.50.980 (GENE3D); IPR010080 (TIGRFAM); IPR010071 (TIGRFAM); IPR000873 (PFAM); G3DSA:3.30.300.30 (GENE3D); IPR016040 (G3DSA:3.40.50.GENE3D); IPR025110 (PFAM); G3DSA:3.40.50.980 (GENE3D); IPR002198 (PFAM); IPR009081 (PFAM); IPR016040 (G3DSA:3.40.50.GENE3D); G3DSA:2.30.38.10 (GENE3D); IPR009081 (G3DSA:1.10.1200.GENE3D); PTHR24095:SF141 (PANTHER); PTHR24095 (PANTHER); IPR020904 (PROSITE_PATTERNS); CYTOPLASMIC_DOMAIN (PHOBIUS); TRANSMEMBRANE (PHOBIUS); CYTOPLASMIC_DOMAIN (PHOBIUS); NON_CYTOPLASMIC_DOMAIN (PHOBIUS); TRANSMEMBRANE (PHOBIUS); NON_CYTOPLASMIC_DOMAIN (PHOBIUS); TRANSMEMBRANE (PHOBIUS); IPR009081 (PROSITE_PROFILES); SSF51735 (SUPERFAMILY); SSF56801 (SUPERFAMILY); IPR009081 (SUPERFAMILY); SSF51735 (SUPERFAMILY); TMhelix (TMHMM); TMhelix (TMHMM); TMhelix (TMHMM) |
| 1964 | c40260_g1_i2_len_3808_path_337_0_178_516_179_3807_1                                         | 1740 | I-aminoadipate-semialdehyde dehydrogenase-like | 1269 | 0         | 67.30% | 0.125  | IPR002347 (PRINTS); IPR002198 (PRINTS); IPR013968 (SMART); G3DSA:2.30.38.10 (GENE3D); IPR016040 (G3DSA:3.40.50.GENE3D); G3DSA:3.30.300.30 (GENE3D); IPR013120 (PFAM); IPR009081 (G3DSA:1.10.1200.GENE3D); IPR010080 (TIGRFAM); IPR025110 (PFAM); IPR002198 (PFAM); IPR009081 (PFAM); IPR000873 (PFAM); IPR016040 (G3DSA:3.40.50.GENE3D); PTHR24095 (PANTHER); PTHR24095:SF141 (PANTHER); IPR020904 (PROSITE_PATTERNS); TRANSMEMBRANE (PHOBIUS); TRANSMEMBRANE (PHOBIUS); CYTOPLASMIC_DOMAIN (PHOBIUS); NON_CYTOPLASMIC_DOMAIN (PHOBIUS); NON_CYTOPLASMIC_DOMAIN (PHOBIUS); CYTOPLASMIC_DOMAIN (PHOBIUS); TRANSMEMBRANE (PHOBIUS); IPR009081 (PROSITE_PROFILES); SSF56801 (SUPERFAMILY); SSF51735 (SUPERFAMILY); SSF51735 (SUPERFAMILY); IPR009081 (SUPERFAMILY); TMhelix (TMHMM); TMhelix (TMHMM); TMhelix (TMHMM)                                                                              |
| 1965 | c40268_g1_i1_len_1028_path_1_0_22_6057_23_47_49_48_97_99_98_342_344_343_741_5472_742_1027_2 | 259  | growth differentiation factor 8-like           | 342  | 4.17E-36  | 57.40% | 0.419Y | IPR001111 (PFAM); IPR015615 (PANTHER); PTHR11848:SF126 (PANTHER); CYTOPLASMIC_DOMAIN (PHOBIUS); NON_CYTOPLASMIC_DOMAIN (PHOBIUS); TRANSMEMBRANE (PHOBIUS); TRANSMEMBRANE (PHOBIUS); TMhelix (TMHMM); TMhelix (TMHMM)                                                                                                                                                                                                                                                                                                                                                                                                                                                                                                                                                                                                                                                                            |
| 1966 | c40268_g1_i2_len_2521_path_1_0_22_6057_23_47_49_48_97_99_98_342_344_343_741_743_742_2520_2  | 640  | growth differentiation factor 8-like           | 840  | 7.07E-110 | 64.30% | 0.419Y | IPR001839 (SMART); IPR029034 (G3DSA:2.10.90.GENE3D); IPR001111 (PFAM); IPR001839 (PFAM); IPR015615 (PANTHER); PTHR11848:SF126 (PANTHER); IPR017948 (PROSITE_PATTERNS); TRANSMEMBRANE (PHOBIUS); TRANSMEMBRANE (PHOBIUS); NON_CYTOPLASMIC_DOMAIN (PHOBIUS); TRANSMEMBRANE (PHOBIUS); TRANSMEMBRANE (PHOBIUS); TRANSMEMBRANE (PHOBIUS); NON_CYTOPLASMIC_DOMAIN (PHOBIUS); CYTOPLASMIC_DOMAIN (PHOBIUS); CYTOPLASMIC_DOMAIN (PHOBIUS); TRANSMEMBRANE (PHOBIUS); CYTOPLASMIC_DOMAIN (PHOBIUS); CYTOPLASMIC_DOMAIN (PHOBIUS); NON_CYTOPLASMIC_DOMAIN (PHOBIUS); NON_CYTOPLASMIC_DOMAIN (PHOBIUS); IPR001839 (PROSITE_PROFILES); IPR029034 (SUPERFAMILY); TMhelix (TMHMM); TMhelix (TMHMM); TMhelix (TMHMM); TMhelix (TMHMM)                                                                                                                                                                          |
| 1967 | c40296_g3_i1_len_1193_path_7883_0_1192_1                                                    | 3231 | cathepsin I precursor                          | 398  | 2.80E-24  | 87.90% | 0.106  | G3DSA:2.40.50.170 (GENE3D); IPR000668 (PFAM); PTHR12411:SF265 (PANTHER); IPR013128 (PANTHER); IPR025661 (PROSITE_PATTERNS); TRANSMEMBRANE (PHOBIUS); NON_CYTOPLASMIC_DOMAIN (PHOBIUS); CYTOPLASMIC_DOMAIN (PHOBIUS); CYTOPLASMIC_DOMAIN (PHOBIUS); TRANSMEMBRANE (PHOBIUS); TRANSMEMBRANE (PHOBIUS); NON_CYTOPLASMIC_DOMAIN (PHOBIUS); SSF54001 (SUPERFAMILY); TMhelix (TMHMM)                                                                                                                                                                                                                                                                                                                                                                                                                                                                                                                  |
| 1968 | c40298_g2_i1_len_862_path_1979_0_16_1996_17_861_3                                           | 170  | gtp-binding protein sar1                       | 288  | 2.78E-126 | 93.10% | 0.132  | IPR006689 (PRINTS); IPR024156 (SMART); IPR006687 (SMART); IPR027417 (G3DSA:3.40.50.GENE3D); IPR006689 (PFAM); IPR005225 (TIGRFAM); PTHR11711 (PANTHER); PTHR11711:SF133 (PANTHER); TRANSMEMBRANE (PHOBIUS); CYTOPLASMIC_DOMAIN (PHOBIUS); NON_CYTOPLASMIC_DOMAIN (PHOBIUS); IPR006687 (PROSITE_PROFILES); IPR027417 (SUPERFAMILY)                                                                                                                                                                                                                                                                                                                                                                                                                                                                                                                                                               |

|      |                                                                                                        |      |                                                             |      |           |        |       |                                                                                                                                                                                                                                                                                                                                                                                                                                                                                                                                                                                                                                                                                                                            |
|------|--------------------------------------------------------------------------------------------------------|------|-------------------------------------------------------------|------|-----------|--------|-------|----------------------------------------------------------------------------------------------------------------------------------------------------------------------------------------------------------------------------------------------------------------------------------------------------------------------------------------------------------------------------------------------------------------------------------------------------------------------------------------------------------------------------------------------------------------------------------------------------------------------------------------------------------------------------------------------------------------------------|
| 1969 | c40298_g2_i2_len_2450_path_1041_0_909_1_951_910_933_7467_934_1342_7875_1343_1348_2031_1349_1466_2558_3 | 421  | gtp-binding protein sar1                                    | 817  | 3.28E-128 | 93.40% | 0.132 | IPR006689 (PRINTS); IPR006687 (SMART); IPR024156 (SMART); IPR006689 (PFAM); IPR005225 (TIGRFAM); IPR027417 (G3DSA:3.40.50.GENE3D); PTHR11711 (PANTHER); PTHR11711:SF133 (PANTHER); NON_CYTOPLASMIC_DOMAIN (PHOBIUS); NON_CYTOPLASMIC_DOMAIN (PHOBIUS); CYTOPLASMIC_DOMAIN (PHOBIUS); TRANSMEMBRANE (PHOBIUS); NON_CYTOPLASMIC_DOMAIN (PHOBIUS); TRANSMEMBRANE (PHOBIUS); CYTOPLASMIC_DOMAIN (PHOBIUS); TRANSMEMBRANE (PHOBIUS); IPR006687 (PROSITE_PROFILES); IPR027417 (SUPERFAMILY); TMhelix (TMHMM); TMhelix (TMHMM); TMhelix (TMHMM); TMhelix (TMHMM); TMhelix (TMHMM)                                                                                                                                                 |
| 1970 | c40299_g1_i1_len_4155_path_1_0_3541_3543_3542_4154_4                                                   | 6275 | map kinase-interacting serine threonine-protein kinase 1    | 1385 | 0         | 78.30% | 0.302 | IPR002290 (SMART); IPR000719 (PFAM); G3DSA:1.10.510.10 (GENE3D); G3DSA:3.30.200.20 (GENE3D); PTHR24349 (PANTHER); IPR008271 (PROSITE_PATTERNS); TRANSMEMBRANE (PHOBIUS); CYTOPLASMIC_DOMAIN (PHOBIUS); TRANSMEMBRANE (PHOBIUS); NON_CYTOPLASMIC_DOMAIN (PHOBIUS); TRANSMEMBRANE (PHOBIUS); NON_CYTOPLASMIC_DOMAIN (PHOBIUS); TRANSMEMBRANE (PHOBIUS); CYTOPLASMIC_DOMAIN (PHOBIUS); CYTOPLASMIC_DOMAIN (PHOBIUS); TRANSMEMBRANE (PHOBIUS); TRANSMEMBRANE (PHOBIUS); NON_CYTOPLASMIC_DOMAIN (PHOBIUS); CYTOPLASMIC_DOMAIN (PHOBIUS); TRANSMEMBRANE (PHOBIUS); IPR000719 (PROSITE_PROFILES); SignalP-TM (SIGNALP_GRAM_POSITIVE); IPR011009 (SUPERFAMILY); TMhelix (TMHMM); TMhelix (TMHMM); TMhelix (TMHMM); TMhelix (TMHMM) |
| 1971 | c40308_g1_i1_len_2898_path_257_0_1742_1_998_1743_1758_2014_1759_2559_232_256_0_2773_6445_2774_2777_2   | 869  | hemocyte protein-glutamine gamma- partial                   | 966  | 0         | 70.40% | 0.335 | IPR002931 (SMART); IPR001102 (PFAM); IPR013783 (G3DSA:2.60.40.GENE3D); IPR002931 (PFAM); IPR013783 (G3DSA:2.60.40.GENE3D); IPR002931 (G3DSA:3.90.260.GENE3D); IPR013783 (G3DSA:2.60.40.GENE3D); IPR008958 (PFAM); PTHR11590:SF40 (PANTHER); IPR023608 (PANTHER); IPR008958 (SUPERFAMILY); IPR008958 (SUPERFAMILY); SSF54001 (SUPERFAMILY); IPR014756 (SUPERFAMILY)                                                                                                                                                                                                                                                                                                                                                         |
| 1972 | c40310_g1_i3_len_438_path_1807_0_28_132_0_29_59_2687_60_65_1357_66_76_1368_77_113_1405_114_230_1520_3  | 23   | zinc finger                                                 | 146  | 3.30E-30  | 57.80% | 0.136 | IPR015880 (SMART); IPR013087 (G3DSA:3.30.160.GENE3D); PF13912 (PFAM); PF13465 (PFAM); IPR013087 (G3DSA:3.30.160.GENE3D); PTHR24409 (PANTHER); IPR007087 (PROSITE_PATTERNS); IPR007087 (PROSITE_PATTERNS); IPR007087 (PROSITE_PATTERNS); IPR007087 (PROSITE_PATTERNS); IPR007087 (PROSITE_PROFILES); IPR007087 (PROSITE_PROFILES); IPR007087 (PROSITE_PROFILES); IPR007087 (PROSITE_PROFILES); SSF57667 (SUPERFAMILY); SSF57667 (SUPERFAMILY); SSF57667 (SUPERFAMILY)                                                                                                                                                                                                                                                       |
| 1973 | c40325_g1_i1_len_3007_path_1_0_502_504_503_1923_1925_1924_2276_2278_2277_22_77_2279_2278_2939_2        | 2058 | pdz and lim domain protein zasp-like                        | 1002 | 6.22E-35  | 53.40% | 0.108 | IPR001478 (SMART); IPR001478 (G3DSA:2.30.42.GENE3D); IPR001478 (PFAM); PTHR24214:SF29 (PANTHER); PTHR24214 (PANTHER); CYTOPLASMIC_DOMAIN (PHOBIUS); NON_CYTOPLASMIC_DOMAIN (PHOBIUS); TRANSMEMBRANE (PHOBIUS); IPR001478 (PROSITE_PROFILES); IPR001478 (SUPERFAMILY)                                                                                                                                                                                                                                                                                                                                                                                                                                                       |
| 1974 | c40325_g1_i2_len_3049_path_1_0_502_6249_503_544_504_545_1965_1925_1966_2318_2278_2319_2319_2279_2      | 1938 | pdz and lim domain protein zasp-like                        | 1016 | 7.84E-35  | 54.00% | 0.108 | IPR001478 (SMART); IPR001478 (G3DSA:2.30.42.GENE3D); IPR001478 (PFAM); PTHR24214 (PANTHER); PTHR24214:SF29 (PANTHER); NON_CYTOPLASMIC_DOMAIN (PHOBIUS); CYTOPLASMIC_DOMAIN (PHOBIUS); TRANSMEMBRANE (PHOBIUS); IPR001478 (PROSITE_PROFILES); IPR001478 (SUPERFAMILY)                                                                                                                                                                                                                                                                                                                                                                                                                                                       |
| 1975 | c40328_g1_i1_len_3855_path_2574_0_1770_4359_1771_1890_9738_1891_1911_4502_1912_1937_5986_1938_1938_5   | 710  | ectonucleoside triphosphate diphosphohydrolase 5 isoform x2 | 1285 | 1.04E-154 | 67.10% | 0.134 | IPR000407 (PFAM); PTHR11782:SF30 (PANTHER); IPR000407 (PANTHER); CYTOPLASMIC_DOMAIN (PHOBIUS); TRANSMEMBRANE (PHOBIUS); NON_CYTOPLASMIC_DOMAIN (PHOBIUS); CYTOPLASMIC_DOMAIN (PHOBIUS); CYTOPLASMIC_DOMAIN (PHOBIUS); TRANSMEMBRANE (PHOBIUS); NON_CYTOPLASMIC_DOMAIN (PHOBIUS); TRANSMEMBRANE (PHOBIUS); TRANSMEMBRANE (PHOBIUS); TRANSMEMBRANE (PHOBIUS); CYTOPLASMIC_DOMAIN (PHOBIUS); NON_CYTOPLASMIC_DOMAIN (PHOBIUS); TRANSMEMBRANE (PHOBIUS); CYTOPLASMIC_DOMAIN (PHOBIUS); TRANSMEMBRANE (PHOBIUS); TRANSMEMBRANE (PHOBIUS); NON_CYTOPLASMIC_DOMAIN (PHOBIUS); TMhelix (TMHMM); TMhelix (TMHMM); TMhelix (TMHMM)                                                                                                   |

|      |                                                                                                        |      |                                                             |      |           |        |         |                                                                                                                                                                                                                                                                                                                                                                                                                                                                                           |
|------|--------------------------------------------------------------------------------------------------------|------|-------------------------------------------------------------|------|-----------|--------|---------|-------------------------------------------------------------------------------------------------------------------------------------------------------------------------------------------------------------------------------------------------------------------------------------------------------------------------------------------------------------------------------------------------------------------------------------------------------------------------------------------|
| 1976 | c40328_g1_i2_len_3873_path_2574_0_1770_4343_1771_1786_4359_1787_1906_9738_1907_1927_4500_1928_1929_5   | 789  | ectonucleoside triphosphate diphosphohydrolase 5 isoform x2 | 1291 | 1.91E-154 | 67.10% | 0.134   | IPR000407 (PFAM); IPR000407 (PANTHER); PTHR11782:SF30 (PANTHER); NON_CYTOPLASMIC_DOMAIN (PHOBIUS); TRANSMEMBRANE (PHOBIUS); TRANSMEMBRANE (PHOBIUS); TRANSMEMBRANE (PHOBIUS); CYTOPLASMIC_DOMAIN (PHOBIUS); NON_CYTOPLASMIC_DOMAIN (PHOBIUS); NON_CYTOPLASMIC_DOMAIN (PHOBIUS); CYTOPLASMIC_DOMAIN (PHOBIUS); TRANSMEMBRANE (PHOBIUS); TRANSMEMBRANE (PHOBIUS); CYTOPLASMIC_DOMAIN (PHOBIUS); CYTOPLASMIC_DOMAIN (PHOBIUS); TMhelix (TMHMM); TMhelix (TMHMM); TMhelix (TMHMM)             |
| 1977 | c40329_g3_i1_len_1839_path_8793_0_474_9_268_475_1170_20156_1171_1172_11742_1173_1838_4                 | 92   | maltase- partial                                            | 613  | 4.57E-138 | 55.70% | 0.109   | IPR000322 (PFAM); PTHR22762 (PANTHER); PTHR22762:SF7 (PANTHER); IPR011013 (SUPERFAMILY); IPR017853 (SUPERFAMILY)                                                                                                                                                                                                                                                                                                                                                                          |
| 1978 | c40329_g3_i3_len_3326_path_10938_0_108_9268_109_804_20156_805_806_1427_807_1379_20204_1380_3115_202_3  | 387  | maltase- partial                                            | 1109 | 4.44E-63  | 64.80% | 0.412 Y | IPR000322 (PFAM); PTHR22762:SF7 (PANTHER); PTHR22762 (PANTHER); TRANSMEMBRANE (PHOBIUS); NON_CYTOPLASMIC_DOMAIN (PHOBIUS); CYTOPLASMIC_DOMAIN (PHOBIUS); CYTOPLASMIC_DOMAIN (PHOBIUS); TRANSMEMBRANE (PHOBIUS); NON_CYTOPLASMIC_DOMAIN (PHOBIUS); TRANSMEMBRANE (PHOBIUS); TRANSMEMBRANE (PHOBIUS); IPR017853 (SUPERFAMILY); IPR011013 (SUPERFAMILY)                                                                                                                                      |
| 1979 | c40329_g3_i4_len_3692_path_8793_0_474_9_268_475_1170_20156_1171_1172_1427_1173_1745_20204_1746_3481_3  | 418  | maltase- partial                                            | 1231 | 2.52E-101 | 59.50% | 0.412Y  | IPR000322 (PFAM); PTHR22762:SF7 (PANTHER); PTHR22762 (PANTHER); TRANSMEMBRANE (PHOBIUS); CYTOPLASMIC_DOMAIN (PHOBIUS); NON_CYTOPLASMIC_DOMAIN (PHOBIUS); CYTOPLASMIC_DOMAIN (PHOBIUS); TRANSMEMBRANE (PHOBIUS); CYTOPLASMIC_DOMAIN (PHOBIUS); TRANSMEMBRANE (PHOBIUS); IPR017853 (SUPERFAMILY); IPR011013 (SUPERFAMILY)                                                                                                                                                                   |
| 1980 | c40333_g1_i4_len_686_path_335_0_56_2782_57_60_2742_61_77_667_78_85_47_86_95_973_96_685_4               | 772  | pacifastin light chain                                      | 229  | 8.54E-16  | 51.60% | 0.474Y  | IPR008197 (PRINTS); IPR008197 (SMART); IPR008037 (PFAM); IPR008197 (G3DSA:4.10.75.GENE3D); IPR008197 (PFAM); IPR020862 (PROSITE_PROFILES); IPR008197 (PROSITE_PROFILES); IPR020862 (PROSITE_PROFILES); IPR020862 (PROSITE_PROFILES); IPR008037 (SUPERFAMILY); IPR008037 (SUPERFAMILY); IPR008197 (SUPERFAMILY); IPR008037 (SUPERFAMILY); TMhelix (TMHMM)                                                                                                                                  |
| 1981 | c40338_g1_i1_len_1352_path_4233_0_53_17_39_54_88_1774_89_146_1832_147_185_328_8_186_239_1925_240_271_5 | 4409 | mite allergen lep d partial                                 | 450  | 9.29E-13  | 47.70% | 0.105   | PTHR11008:SF13 (PANTHER); PTHR11008 (PANTHER); NON_CYTOPLASMIC_DOMAIN (PHOBIUS); TRANSMEMBRANE (PHOBIUS); CYTOPLASMIC_DOMAIN (PHOBIUS); CYTOPLASMIC_DOMAIN (PHOBIUS); TRANSMEMBRANE (PHOBIUS); TRANSMEMBRANE (PHOBIUS); NON_CYTOPLASMIC_DOMAIN (PHOBIUS); TRANSMEMBRANE (PHOBIUS); IPR020234 (PRODOM); TMhelix (TMHMM); TMhelix (TMHMM); TMhelix (TMHMM)                                                                                                                                  |
| 1982 | c40347_g1_i3_len_1960_path_2755_0_1717_4472_1718_1815_189_1816_1890_4644_1891_1920_6450_1921_1929_4_1  | 98   | sco- partial                                                | 653  | 8.71E-85  | 49.30% | 0.103   | IPR000421 (SMART); IPR008979 (G3DSA:2.60.120.GENE3D); IPR002919 (PFAM); G3DSA:2.10.25.10 (GENE3D); IPR025155 (PFAM); IPR000421 (PFAM); PTHR24543 (PANTHER); IPR000421 (PROSITE_PATTERNS); IPR000421 (PROSITE_PROFILES); IPR008979 (SUPERFAMILY)                                                                                                                                                                                                                                           |
| 1983 | c40347_g1_i5_len_1902_path_2755_0_1717_391_1718_1901_1                                                 | 75   | sco- partial                                                | 634  | 6.96E-89  | 50.60% | 0.103   | IPR000421 (SMART); G3DSA:2.10.25.10 (GENE3D); IPR000421 (PFAM); IPR025155 (PFAM); IPR008979 (G3DSA:2.60.120.GENE3D); IPR002919 (PFAM); PTHR24543:SF244 (PANTHER); PTHR24543 (PANTHER); IPR000421 (PROSITE_PATTERNS); IPR000421 (PROSITE_PROFILES); IPR008979 (SUPERFAMILY)                                                                                                                                                                                                                |
| 1984 | c40348_g1_i1_len_3417_path_127_0_217_34_5_218_249_377_250_319_446_320_331_37_332_2122_7034_2123_2_0    | 4145 | aldehyde dehydrogenase 2 family                             | 1139 | 0         | 83.10% | 0.121   | IPR016162 (G3DSA:3.40.605.GENE3D); IPR015590 (PFAM); IPR016163 (G3DSA:3.40.309.GENE3D); PTHR11699 (PANTHER); PTHR11699:SF145 (PANTHER); IPR016160 (PROSITE_PATTERNS); IPR029510 (PROSITE_PATTERNS); TRANSMEMBRANE (PHOBIUS); TRANSMEMBRANE (PHOBIUS); CYTOPLASMIC_DOMAIN (PHOBIUS); NON_CYTOPLASMIC_DOMAIN (PHOBIUS); NON_CYTOPLASMIC_DOMAIN (PHOBIUS); CYTOPLASMIC_DOMAIN (PHOBIUS); TRANSMEMBRANE (PHOBIUS); IPR016161 (SUPERFAMILY); TMhelix (TMHMM); TMhelix (TMHMM); TMhelix (TMHMM) |
| 1985 | c40352_g1_i1_len_931_path_1_0_164_166_1_65_930_5                                                       | 1101 | aminoacylase-1 isoform x2                                   | 310  | 7.97E-69  | 69.40% | 0.251   | IPR002933 (PFAM); G3DSA:3.40.630.10 (GENE3D); PTHR11014 (PANTHER); PTHR11014:SF8 (PANTHER); IPR001261 (PROSITE_PATTERNS); IPR001261 (PROSITE_PATTERNS); CYTOPLASMIC_DOMAIN (PHOBIUS); TRANSMEMBRANE (PHOBIUS); NON_CYTOPLASMIC_DOMAIN (PHOBIUS); SSF53187 (SUPERFAMILY)                                                                                                                                                                                                                   |

|      |                                                                                                            |       |                                                                                                                      |     |           |        |         |                                                                                                                                                                                                                                                                                                                                                                                                                                                                                                                                                                         |
|------|------------------------------------------------------------------------------------------------------------|-------|----------------------------------------------------------------------------------------------------------------------|-----|-----------|--------|---------|-------------------------------------------------------------------------------------------------------------------------------------------------------------------------------------------------------------------------------------------------------------------------------------------------------------------------------------------------------------------------------------------------------------------------------------------------------------------------------------------------------------------------------------------------------------------------|
| 1986 | c40352_g1_i2_len_1792_path_5047_0_185_5<br>233_186_212_5260_213_236_5284_237_252_5300_253_293_5341_294_5   | 1957  | aminoacylase-1 isoform x1                                                                                            | 597 | 1.60E-152 | 69.30% | 0.251   | IPR002933 (PFAM); IPR010159 (TIGRFAM); IPR011650 (PFAM); G3DSA:3.40.630.10 (GENE3D); IPR011650 (G3DSA:3.30.70.GENE3D); PTHR11014 (PANTHER); PTHR11014:SF8 (PANTHER); IPR001261 (PROSITE_PATTERNS); IPR001261 (PROSITE_PATTERNS); CYTOPLASMIC_DOMAIN (PHOBIUS); NON_CYTOPLASMIC_DOMAIN (PHOBIUS); TRANSMEMBRANE (PHOBIUS); SSF53187 (SUPERFAMILY); IPR011650 (SUPERFAMILY)                                                                                                                                                                                               |
| 1987 | c40352_g1_i3_len_2163_path_2714_0_683_3<br>398_684_725_6240_726_762_3477_763_109_5_3806_1096_1108_3819_1_5 | 2058  | aminoacylase-1 isoform x1                                                                                            | 721 | 2.65E-151 | 68.90% | 0.251   | IPR010159 (TIGRFAM); G3DSA:3.40.630.10 (GENE3D); IPR002933 (PFAM); IPR011650 (G3DSA:3.30.70.GENE3D); IPR011650 (PFAM); PTHR11014 (PANTHER); PTHR11014:SF8 (PANTHER); IPR001261 (PROSITE_PATTERNS); IPR001261 (PROSITE_PATTERNS); TRANSMEMBRANE (PHOBIUS); TRANSMEMBRANE (PHOBIUS); CYTOPLASMIC_DOMAIN (PHOBIUS); CYTOPLASMIC_DOMAIN (PHOBIUS); NON_CYTOPLASMIC_DOMAIN (PHOBIUS); IPR011650 (SUPERFAMILY); SSF53187 (SUPERFAMILY); TMhelix (TMHMM)                                                                                                                       |
| 1988 | c40357_g1_i1_len_1305_path_3671_0_741_4<br>411_742_890_4560_891_928_4597_929_104_9_2129_1050_1090_4758_1_0 | 1513  | cathepsin I                                                                                                          | 435 | 0         | 80.90% | 0.124   | IPR000668 (PRINTS); IPR013201 (SMART); IPR000668 (SMART); IPR013201 (PFAM); G3DSA:3.90.70.10 (GENE3D); IPR000668 (PFAM); IPR013128 (PANTHER); PTHR12411:SF57 (PANTHER); IPR000169 (PROSITE_PATTERNS); IPR025660 (PROSITE_PATTERNS); IPR025661 (PROSITE_PATTERNS); CYTOPLASMIC_DOMAIN (PHOBIUS); TRANSMEMBRANE (PHOBIUS); CYTOPLASMIC_DOMAIN (PHOBIUS); TRANSMEMBRANE (PHOBIUS); NON_CYTOPLASMIC_DOMAIN (PHOBIUS); TRANSMEMBRANE (PHOBIUS); NON_CYTOPLASMIC_DOMAIN (PHOBIUS); SSF54001 (SUPERFAMILY); TMhelix (TMHMM)                                                    |
| 1989 | c40357_g1_i2_len_1868_path_3671_0_741_8<br>942_742_890_4560_891_928_129_929_980_181_981_1867_0             | 1064  | cathepsin I                                                                                                          | 623 | 3.79E-171 | 79.50% | 0.124   | IPR000668 (PRINTS); IPR000668 (SMART); IPR013201 (SMART); IPR013201 (PFAM); IPR000668 (PFAM); G3DSA:3.90.70.10 (GENE3D); PTHR12411:SF57 (PANTHER); IPR013128 (PANTHER); IPR025660 (PROSITE_PATTERNS); IPR025661 (PROSITE_PATTERNS); IPR000169 (PROSITE_PATTERNS); NON_CYTOPLASMIC_DOMAIN (PHOBIUS); NON_CYTOPLASMIC_DOMAIN (PHOBIUS); CYTOPLASMIC_DOMAIN (PHOBIUS); TRANSMEMBRANE (PHOBIUS); CYTOPLASMIC_DOMAIN (PHOBIUS); TRANSMEMBRANE (PHOBIUS); TRANSMEMBRANE (PHOBIUS); SSF54001 (SUPERFAMILY); TMhelix (TMHMM); TMhelix (TMHMM); TMhelix (TMHMM); TMhelix (TMHMM) |
| 1990 | c40357_g2_i1_len_1969_path_129_0_51_206<br>0_52_120_2129_121_161_5216_162_586_56_39_587_1139_6189_114_1    | 1029  | cathepsin I                                                                                                          | 656 | 2.53E-25  | 86.50% | 0.148   | IPR000668 (PFAM); G3DSA:2.40.50.170 (GENE3D); PTHR12411:SF54 (PANTHER); IPR013128 (PANTHER); IPR025660 (PROSITE_PATTERNS); IPR025661 (PROSITE_PATTERNS); CYTOPLASMIC_DOMAIN (PHOBIUS); TRANSMEMBRANE (PHOBIUS); NON_CYTOPLASMIC_DOMAIN (PHOBIUS); SSF54001 (SUPERFAMILY)                                                                                                                                                                                                                                                                                                |
| 1991 | c40357_g2_i2_len_1999_path_129_0_51_206<br>0_52_120_2129_121_161_5216_162_586_91_60_587_616_5639_617_1     | 1027  | cathepsin I                                                                                                          | 666 | 2.67E-25  | 86.50% | 0.148   | IPR000668 (PFAM); G3DSA:2.40.50.170 (GENE3D); PTHR12411:SF54 (PANTHER); IPR013128 (PANTHER); IPR025660 (PROSITE_PATTERNS); IPR025661 (PROSITE_PATTERNS); CYTOPLASMIC_DOMAIN (PHOBIUS); NON_CYTOPLASMIC_DOMAIN (PHOBIUS); TRANSMEMBRANE (PHOBIUS); SSF54001 (SUPERFAMILY)                                                                                                                                                                                                                                                                                                |
| 1992 | c40379_g1_i1_len_1284_path_3249_0_331_3<br>37_332_370_2697_371_554_558_555_704_7_08_705_841_4200_842_128_3 | 102   | huga_polan ame: full=hyaluronidase short=hya ame: full=hyaluronoglucosaminidase ame: allergen=pol a 2 flags: partial | 428 | 1.84E-70  | 56.30% | 0.341 Y | IPR018155 (PRINTS); IPR018155 (PFAM); IPR013785 (G3DSA:3.20.20.GENE3D); IPR018155 (PANTHER); PTHR11769:SF8 (PANTHER); NON_CYTOPLASMIC_DOMAIN (PHOBIUS); TRANSMEMBRANE (PHOBIUS); CYTOPLASMIC_DOMAIN (PHOBIUS); IPR017853 (SUPERFAMILY); TMhelix (TMHMM)                                                                                                                                                                                                                                                                                                                 |
| 1993 | c40379_g1_i2_len_1184_path_105_0_231_33<br>7_232_270_376_271_454_558_455_604_311_3_605_741_4200_742_1183_3 | 151   | hyaluronidase-like                                                                                                   | 395 | 3.81E-74  | 56.90% | 0.341 Y | IPR018155 (PRINTS); IPR018155 (PFAM); IPR013785 (G3DSA:3.20.20.GENE3D); PTHR11769:SF8 (PANTHER); IPR018155 (PANTHER); NON_CYTOPLASMIC_DOMAIN (PHOBIUS); CYTOPLASMIC_DOMAIN (PHOBIUS); TRANSMEMBRANE (PHOBIUS); IPR017853 (SUPERFAMILY); TMhelix (TMHMM)                                                                                                                                                                                                                                                                                                                 |
| 1994 | c40385_g1_i1_len_1983_path_1_0_781_783_782_817_819_818_848_13343_849_877_879_878_1727_13282_1728_17_4      | 19078 | pancreatic triacylglycerol lipase-like                                                                               | 661 | 6.53E-106 | 58.30% | 0.374 Y | IPR000734 (PRINTS); IPR002331 (PRINTS); IPR029058 (G3DSA:3.40.50.GENE3D); IPR001024 (G3DSA:2.60.60.GENE3D); IPR013818 (PFAM); IPR000734 (PANTHER); IPR008976 (SUPERFAMILY); IPR029058 (SUPERFAMILY)                                                                                                                                                                                                                                                                                                                                                                     |
| 1995 | c40385_g1_i2_len_2267_path_10048_0_11_1<br>0060_12_1065_783_1066_1101_12893_1102_1132_13343_1133_1161_4_4  | 3306  | inactive pancreatic lipase-related protein 1                                                                         | 756 | 7.76E-104 | 57.70% | 0.368 Y | IPR002331 (PRINTS); IPR000734 (PRINTS); IPR029058 (G3DSA:3.40.50.GENE3D); IPR001024 (G3DSA:2.60.60.GENE3D); IPR013818 (PFAM); IPR000734 (PANTHER); IPR001024 (PROSITE_PROFILES); IPR029058 (SUPERFAMILY); IPR008976 (SUPERFAMILY)                                                                                                                                                                                                                                                                                                                                       |

|      |                                                                                                        |      |                                                      |      |           |        |         |                                                                                                                                                                                                                                                                                                                                                                                                                                                                                                                                       |
|------|--------------------------------------------------------------------------------------------------------|------|------------------------------------------------------|------|-----------|--------|---------|---------------------------------------------------------------------------------------------------------------------------------------------------------------------------------------------------------------------------------------------------------------------------------------------------------------------------------------------------------------------------------------------------------------------------------------------------------------------------------------------------------------------------------------|
| 1996 | c40385_g2_i1_len_2073_path_5751_0_1611_5345_1612_1635_7384_1636_1864_13255_1_865_1900_13282_1901_190_5 | 8567 | pancreatic triacylglycerol lipase-like               | 691  | 4.23E-99  | 56.90% | 0.837 Y | IPR002331 (PRINTS); IPR000734 (PRINTS); IPR029058 (G3DSA:3.40.50.GENE3D); IPR001024 (G3DSA:2.60.60.GENE3D); IPR013818 (PFAM); IPR000734 (PANTHER); SIGNAL_PEPTIDE_N_REGION (PHOBIUS); SIGNAL_PEPTIDE_C_REGION (PHOBIUS); SIGNAL_PEPTIDE_H_REGION (PHOBIUS); TRANSMEMBRANE (PHOBIUS); NON_CYTOPLASMIC_DOMAIN (PHOBIUS); CYTOPLASMIC_DOMAIN (PHOBIUS); SIGNAL_PEPTIDE (PHOBIUS); SignalP-noTM (SIGNALP_GRAM_NEGATIVE); SignalP-TM (SIGNALP_GRAM_POSITIVE); SignalP-noTM (SIGNALP_EUK); IPR008976 (SUPERFAMILY); IPR029058 (SUPERFAMILY) |
| 1997 | c40396_g1_i1_len_2037_path_53_0_1205_12_59_1206_1218_1272_1219_1435_1489_1436_1464_4773_1465_1565_16_3 | 9337 | sjchgc02838 protein                                  | 679  | 1.97E-124 | 51.40% | 0.426 Y | IPR001547 (PFAM); IPR013781 (G3DSA:3.20.20.GENE3D); PTHR31308 (PANTHER); SIGNAL_PEPTIDE_H_REGION (PHOBIUS); SIGNAL_PEPTIDE (PHOBIUS); NON_CYTOPLASMIC_DOMAIN (PHOBIUS); SIGNAL_PEPTIDE_C_REGION (PHOBIUS); SIGNAL_PEPTIDE_N_REGION (PHOBIUS); SignalP-TM (SIGNALP_GRAM_POSITIVE); IPR017853 (SUPERFAMILY); TMhelix (TMHMM)                                                                                                                                                                                                            |
| 1998 | c40399_g1_i1_len_3829_path_4458_0_493_4_952_494_1301_5759_1302_1326_50_1327_2173_9055_2174_3828_2      | 735  | cytosolic phospholipase a2-like isoform x5           | 1276 | 0         | 60.10% | 0.101   | Coil (COILS); IPR000008 (SMART); IPR002642 (SMART); IPR002642 (PFAM); IPR000008 (G3DSA:2.60.40.GENE3D); IPR000008 (PFAM); G3DSA:3.40.1090.10 (GENE3D); PTHR10728 (PANTHER); PTHR10728:SF13 (PANTHER); IPR000008 (PROSITE_PROFILES); IPR002642 (PROSITE_PROFILES); IPR000008 (SUPERFAMILY); IPR016035 (SUPERFAMILY); IPR016035 (SUPERFAMILY)                                                                                                                                                                                           |
| 1999 | c40411_g1_i1_len_2677_path_157_0_2670_2_826_2671_2676_2                                                | 516  | allene oxide synthase-lipoxygenase                   | 892  | 0         | 65.60% | 0.132   | Coil (COILS); IPR013819 (PRINTS); IPR001024 (SMART); IPR013819 (PFAM); IPR001024 (G3DSA:2.60.60.GENE3D); IPR001024 (PFAM); G3DSA:1.20.245.10 (GENE3D); PTHR11771:SF43 (PANTHER); IPR000907 (PANTHER); IPR020834 (PROSITE_PATTERNS); IPR001024 (PROSITE_PROFILES); IPR013819 (PROSITE_PROFILES); IPR008976 (SUPERFAMILY); IPR013819 (SUPERFAMILY)                                                                                                                                                                                      |
| 2000 | c40412_g1_i1_len_2874_path_2419_0_1954_8682_1955_1959_77_1960_2395_513_2396_2873_1                     | 807  | von willebrand domain-containing protein             | 958  | 0         | 56.80% | 0.109   | Coil (COILS); IPR002035 (SMART); IPR013694 (SMART); IPR002035 (G3DSA:3.40.50.GENE3D); IPR013694 (PFAM); PF13768 (PFAM); PTHR10338:SF95 (PANTHER); PTHR10338 (PANTHER); TRANSMEMBRANE (PHOBIUS); NON_CYTOPLASMIC_DOMAIN (PHOBIUS); CYTOPLASMIC_DOMAIN (PHOBIUS); TRANSMEMBRANE (PHOBIUS); NON_CYTOPLASMIC_DOMAIN (PHOBIUS); IPR013694 (PROSITE_PROFILES); IPR002035 (PROSITE_PROFILES); IPR002035 (SUPERFAMILY)                                                                                                                        |
| 2001 | c40412_g1_i2_len_3088_path_2419_0_1954_8682_1955_1959_4370_1960_3087_1                                 | 986  | von willebrand domain-containing protein             | 1029 | 0         | 57.40% | 0.109   | Coil (COILS); IPR013694 (SMART); IPR002035 (SMART); IPR002035 (G3DSA:3.40.50.GENE3D); PF13768 (PFAM); IPR013694 (PFAM); PTHR10338 (PANTHER); PTHR10338:SF95 (PANTHER); IPR013694 (PROSITE_PROFILES); IPR002035 (PROSITE_PROFILES); IPR002035 (SUPERFAMILY)                                                                                                                                                                                                                                                                            |
| 2002 | c40412_g1_i3_len_2433_path_2419_0_1954_513_1955_2432_1                                                 | 732  | von willebrand domain-containing protein             | 811  | 0         | 59.80% | 0.109   | Coil (COILS); IPR013694 (SMART); IPR002035 (SMART); IPR002035 (G3DSA:3.40.50.GENE3D); PF13768 (PFAM); IPR013694 (PFAM); PTHR10338:SF95 (PANTHER); PTHR10338 (PANTHER); TRANSMEMBRANE (PHOBIUS); CYTOPLASMIC_DOMAIN (PHOBIUS); NON_CYTOPLASMIC_DOMAIN (PHOBIUS); TRANSMEMBRANE (PHOBIUS); NON_CYTOPLASMIC_DOMAIN (PHOBIUS); IPR013694 (PROSITE_PROFILES); IPR002035 (PROSITE_PROFILES); IPR002035 (SUPERFAMILY)                                                                                                                        |
| 2003 | c40415_g1_i1_len_761_path_3743_0_59_380_2_60_193_5402_194_195_3937_196_760_3                           | 174  | na(+) h(+) exchange regulatory cofactor nhe-rf2      | 254  | 1.87E-56  | 73.60% | 0.161   | IPR001478 (SMART); IPR001478 (G3DSA:2.30.42.GENE3D); IPR001478 (PFAM); PTHR14191 (PANTHER); IPR001478 (PROSITE_PROFILES); IPR001478 (SUPERFAMILY)                                                                                                                                                                                                                                                                                                                                                                                     |
| 2004 | c40415_g1_i3_len_2002_path_1_0_384_386_385_1219_3074_1220_1434_5402_1435_143_6_3937_1437_2001_3        | 499  | na(+) h(+) exchange regulatory cofactor nhe-rf2-like | 668  | 2.24E-61  | 60.60% | 0.161   | IPR001478 (SMART); IPR001478 (G3DSA:2.30.42.GENE3D); IPR001478 (PFAM); PTHR14191 (PANTHER); IPR001478 (PROSITE_PROFILES); IPR001478 (SUPERFAMILY)                                                                                                                                                                                                                                                                                                                                                                                     |
| 2005 | c40415_g1_i4_len_1724_path_1_0_384_386_385_1219_3074_1220_1434_5402_1435_143_6_3290_1437_1663_3517_1_4 | 655  | na+ h+ exchange regulatory cofactor nhe-rf2          | 575  | 1.50E-08  | 65.00% | 0.108   | no IPS match                                                                                                                                                                                                                                                                                                                                                                                                                                                                                                                          |
| 2006 | c40422_g1_i1_len_1269_path_1192_0_524_4_535_525_1112_4427_1113_1190_4427_1191_1268_4                   | 490  | hypothetical protein CHLREDRAFT_179663               | 423  | 1.02E-14  | 36.00% | 0.101   | NON_CYTOPLASMIC_DOMAIN (PHOBIUS); CYTOPLASMIC_DOMAIN (PHOBIUS); TRANSMEMBRANE (PHOBIUS); PD936484 (PRODOM); TMhelix (TMHMM)                                                                                                                                                                                                                                                                                                                                                                                                           |
| 2007 | c40438_g1_i1_len_850_path_2600_0_198_17_77_199_225_3016_226_394_1978_395_431_399_432_486_454_487_513_4 | 1053 | u24-ctenitoxin- partial                              | 283  | 2.16E-14  | 47.40% | 0.268   | IPR000716 (SMART); IPR000716 (G3DSA:4.10.800.GENE3D); IPR000716 (PFAM); IPR000716 (PROSITE_PATTERNS); NON_CYTOPLASMIC_DOMAIN (PHOBIUS); SIGNAL_PEPTIDE_C_REGION (PHOBIUS); SIGNAL_PEPTIDE_N_REGION (PHOBIUS); SIGNAL_PEPTIDE_H_REGION (PHOBIUS); SIGNAL_PEPTIDE (PHOBIUS); IPR000716 (PROSITE_PROFILES); IPR000716 (PROSITE_PROFILES); SignalP-TM (SIGNALP_GRAM_POSITIVE); IPR000716 (SUPERFAMILY); IPR000716 (SUPERFAMILY)                                                                                                           |



|      |                                                                                                        |      |                                                |      |          |        |       |                                                                                                                                                                                                                                                                                                                                                                                                                                                                                     |
|------|--------------------------------------------------------------------------------------------------------|------|------------------------------------------------|------|----------|--------|-------|-------------------------------------------------------------------------------------------------------------------------------------------------------------------------------------------------------------------------------------------------------------------------------------------------------------------------------------------------------------------------------------------------------------------------------------------------------------------------------------|
| 2008 | c40438_g1_i2_len_957_path_1478_0_298_17_77_299_325_3479_326_501_1978_502_538_2014_539_593_454_594_62_4 | 2498 | u24-ctenitoxin- partial                        | 319  | 2.45E-14 | 46.50% | 0.268 | IPR000716 (SMART); IPR000716 (G3DSA:4.10.800.GENE3D); IPR000716 (PFAM); IPR000716 (G3DSA:4.10.800.GENE3D); PTHR12352 (PANTHER); IPR000716 (PROSITE_PATTERNS); SIGNAL_PEPTIDE (PHOBIUS); SIGNAL_PEPTIDE_C_REGION (PHOBIUS); SIGNAL_PEPTIDE_N_REGION (PHOBIUS); SIGNAL_PEPTIDE_H_REGION (PHOBIUS); NON_CYTOPLASMIC_DOMAIN (PHOBIUS); IPR000716 (PROSITE_PROFILES); IPR000716 (PROSITE_PROFILES); SignalP-TM (SIGNALP_GRAM_POSITIVE); IPR000716 (SUPERFAMILY); IPR000716 (SUPERFAMILY) |
| 2009 | c40460_g1_i1_len_1178_path_2642_0_1177_1                                                               | 57   | zinc finger protein 431-like isoform x2        | 393  | 1.88E-33 | 54.80% | 0.099 | IPR015880 (SMART); IPR013087 (G3DSA:3.30.160.GENE3D); PF13912 (PFAM); IPR013087 (G3DSA:3.30.160.GENE3D); PF13465 (PFAM); IPR013087 (G3DSA:3.30.160.GENE3D); PTHR24409 (PANTHER); IPR007087 (PROSITE_PATTERNS); IPR007087 (PROSITE_PATTERNS); IPR007087 (PROSITE_PATTERNS); IPR007087 (PROSITE_PROFILES); IPR007087 (PROSITE_PROFILES); IPR007087 (PROSITE_PROFILES); SSF57667 (SUPERFAMILY); SSF57667 (SUPERFAMILY)                                                                 |
| 2010 | c40476_g2_i1_len_1795_path_9032_0_1794_2                                                               | 2797 | retinal dehydrogenase 1-like                   | 598  | 0        | 80.00% | 0.27  | IPR016163 (G3DSA:3.40.309.GENE3D); IPR015590 (PFAM); IPR016162 (G3DSA:3.40.605.GENE3D); PTHR11699 (PANTHER); PTHR11699:SF145 (PANTHER); IPR016160 (PROSITE_PATTERNS); IPR029510 (PROSITE_PATTERNS); IPR016161 (SUPERFAMILY)                                                                                                                                                                                                                                                         |
| 2011 | c40478_g1_i1_len_2104_path_3984_0_1530_5511_1531_2035_6740_2036_2036_6741_2_037_2103_3                 | 486  | iron zinc purple acid phosphatase-like protein | 702  | 0        | 75.50% | 0.217 | IPR029052 (G3DSA:3.60.21.GENE3D); IPR004843 (PFAM); IPR025733 (PFAM); IPR015914 (G3DSA:2.60.40.GENE3D); PTHR22953 (PANTHER); PTHR22953:SF9 (PANTHER); TRANSMEMBRANE (PHOBIUS); NON_CYTOPLASMIC_DOMAIN (PHOBIUS); CYTOPLASMIC_DOMAIN (PHOBIUS); IPR008963 (SUPERFAMILY); IPR029052 (SUPERFAMILY); TMhelix (TMHMM)                                                                                                                                                                    |
| 2012 | c40478_g1_i2_len_595_path_6057_0_21_551_1_22_526_6740_527_527_6741_528_594_3                           | 85   | iron zinc purple acid phosphatase-like partial | 199  | 3.67E-59 | 70.70% | 0.217 | IPR015914 (G3DSA:2.60.40.GENE3D); IPR018946 (PFAM); IPR003961 (PFAM); IPR029052 (G3DSA:3.60.21.GENE3D); PTHR22953:SF9 (PANTHER); PTHR22953 (PANTHER); IPR008963 (SUPERFAMILY)                                                                                                                                                                                                                                                                                                       |
| 2013 | c40478_g1_i3_len_2105_path_3984_0_1530_5511_1531_2035_1181_2036_2104_4                                 | 456  | iron zinc purple acid phosphatase-like protein | 702  | 0        | 75.30% | 0.243 | IPR029052 (G3DSA:3.60.21.GENE3D); IPR025733 (PFAM); IPR004843 (PFAM); IPR015914 (G3DSA:2.60.40.GENE3D); PTHR22953:SF9 (PANTHER); PTHR22953 (PANTHER); CYTOPLASMIC_DOMAIN (PHOBIUS); NON_CYTOPLASMIC_DOMAIN (PHOBIUS); TRANSMEMBRANE (PHOBIUS); TRANSMEMBRANE (PHOBIUS); CYTOPLASMIC_DOMAIN (PHOBIUS); IPR008963 (SUPERFAMILY); IPR029052 (SUPERFAMILY); TMhelix (TMHMM); TMhelix (TMHMM)                                                                                            |
| 2014 | c40484_g1_i1_len_3629_path_5927_0_194_6_122_195_789_9035_790_1922_10168_1923_1924_10170_1925_3628_2    | 639  | supervillin-like isoform x1                    | 1209 | 0        | 64.00% | 0.118 | Coil (COILS); IPR007122 (PRINTS); IPR007122 (SMART); IPR029006 (G3DSA:3.40.20.GENE3D); IPR029006 (G3DSA:3.40.20.GENE3D); IPR007123 (PFAM); IPR015628 (PTHR11977:PANTHER); IPR007122 (PANTHER); SSF55753 (SUPERFAMILY); SSF55753 (SUPERFAMILY); SSF55753 (SUPERFAMILY); SSF55753 (SUPERFAMILY)                                                                                                                                                                                       |
| 2015 | c40484_g1_i2_len_5456_path_6175_0_1278_7700_1279_2021_6122_2022_2616_9035_2_617_3749_10168_3750_3_2    | 760  | supervillin-like isoform x1                    | 1818 | 0        | 63.10% | 0.107 | Coil (COILS); Coil (COILS); IPR007122 (SMART); IPR007123 (PFAM); IPR029006 (G3DSA:3.40.20.GENE3D); IPR029006 (G3DSA:3.40.20.GENE3D); IPR007122 (PANTHER); IPR015628 (PTHR11977:PANTHER); SSF55753 (SUPERFAMILY); SSF55753 (SUPERFAMILY); SSF55753 (SUPERFAMILY); SSF55753 (SUPERFAMILY)                                                                                                                                                                                             |
| 2016 | c40484_g1_i3_len_3568_path_20700_0_728_9035_729_1861_10168_1862_1863_10170_1864_3567_1                 | 611  | supervillin-like isoform x1                    | 1189 | 0        | 66.30% | 0.098 | Coil (COILS); IPR007122 (PRINTS); IPR007122 (SMART); IPR029006 (G3DSA:3.40.20.GENE3D); IPR007123 (PFAM); IPR029006 (G3DSA:3.40.20.GENE3D); IPR015628 (PTHR11977:PANTHER); IPR007122 (PANTHER); SSF55753 (SUPERFAMILY); SSF55753 (SUPERFAMILY); SSF55753 (SUPERFAMILY); SSF55753 (SUPERFAMILY)                                                                                                                                                                                       |
| 2017 | c40484_g1_i4_len_5702_path_6175_0_1278_7454_1279_1524_7700_1525_2267_6122_22_68_2862_9035_2863_39_2    | 784  | supervillin-like isoform x1                    | 1900 | 0        | 63.40% | 0.107 | Coil (COILS); Coil (COILS); IPR007122 (SMART); IPR029006 (G3DSA:3.40.20.GENE3D); IPR007123 (PFAM); IPR029006 (G3DSA:3.40.20.GENE3D); IPR015628 (PTHR11977:PANTHER); IPR007122 (PANTHER); SSF55753 (SUPERFAMILY); SSF55753 (SUPERFAMILY); SSF55753 (SUPERFAMILY); SSF55753 (SUPERFAMILY)                                                                                                                                                                                             |

|      |                                                                                                              |     |                               |      |           |        |       |                                                                                                                                                                                                                                                                                                                                                                                                                                                                                                                                                                                                                                                                                                                                                                                                                                   |
|------|--------------------------------------------------------------------------------------------------------------|-----|-------------------------------|------|-----------|--------|-------|-----------------------------------------------------------------------------------------------------------------------------------------------------------------------------------------------------------------------------------------------------------------------------------------------------------------------------------------------------------------------------------------------------------------------------------------------------------------------------------------------------------------------------------------------------------------------------------------------------------------------------------------------------------------------------------------------------------------------------------------------------------------------------------------------------------------------------------|
| 2018 | c40485_g1_i1_len_2566_path_4325_0_90_71<br>20_91_101_4426_102_187_4511_188_200_9<br>0_201_277_4599_278_292_1 | 166 | latrophilin- partial          | 855  | 9.00E-62  | 49.10% | 0.098 | IPR001879 (SMART); IPR000203 (SMART); IPR001879 (PFAM); IPR000203 (PFAM); IPR000832 (PFAM); IPR022624 (PFAM); PTHR12011 (PANTHER); NON_CYTOPLASMIC_DOMAIN (PHOBIUS); TRANSMEMBRANE (PHOBIUS); TRANSMEMBRANE (PHOBIUS); NON_CYTOPLASMIC_DOMAIN (PHOBIUS); CYTOPLASMIC_DOMAIN (PHOBIUS); TRANSMEMBRANE (PHOBIUS); CYTOPLASMIC_DOMAIN (PHOBIUS); IPR001879 (PROSITE_PROFILES); IPR017981 (PROSITE_PROFILES); IPR000203 (PROSITE_PROFILES); SSF111418 (SUPERFAMILY); TMhelix (TMHMM); TMhelix (TMHMM); TMhelix (TMHMM)                                                                                                                                                                                                                                                                                                                |
| 2019 | c40485_g1_i1_len_2566_path_4325_0_90_71<br>20_91_101_4426_102_187_4511_188_200_9<br>0_201_277_4599_278_292_2 | 166 | latrophilin-3-like isoform x1 | 855  | 2.32E-19  | 61.30% | 0.12  | IPR000832 (PFAM); PTHR12011 (PANTHER); PTHR12011:SF222 (PANTHER); NON_CYTOPLASMIC_DOMAIN (PHOBIUS); CYTOPLASMIC_DOMAIN (PHOBIUS); NON_CYTOPLASMIC_DOMAIN (PHOBIUS); TRANSMEMBRANE (PHOBIUS); NON_CYTOPLASMIC_DOMAIN (PHOBIUS); TRANSMEMBRANE (PHOBIUS); TRANSMEMBRANE (PHOBIUS); CYTOPLASMIC_DOMAIN (PHOBIUS); TRANSMEMBRANE (PHOBIUS); TRANSMEMBRANE (PHOBIUS); NON_CYTOPLASMIC_DOMAIN (PHOBIUS); IPR017981 (PROSITE_PROFILES); TMhelix (TMHMM); TMhelix (TMHMM); TMhelix (TMHMM)                                                                                                                                                                                                                                                                                                                                                |
| 2020 | c40485_g1_i2_len_2688_path_4325_0_90_71<br>20_91_101_4426_102_187_4511_188_200_9<br>0_201_277_4599_278_292_1 | 186 | latrophilin- partial          | 896  | 7.73E-100 | 52.00% | 0.098 | IPR000832 (PRINTS); IPR000203 (SMART); IPR001879 (SMART); IPR001879 (PFAM); IPR022624 (PFAM); IPR000203 (PFAM); IPR000832 (PFAM); PTHR12011 (PANTHER); TRANSMEMBRANE (PHOBIUS); TRANSMEMBRANE (PHOBIUS); TRANSMEMBRANE (PHOBIUS); TRANSMEMBRANE (PHOBIUS); CYTOPLASMIC_DOMAIN (PHOBIUS); NON_CYTOPLASMIC_DOMAIN (PHOBIUS); TRANSMEMBRANE (PHOBIUS); NON_CYTOPLASMIC_DOMAIN (PHOBIUS); CYTOPLASMIC_DOMAIN (PHOBIUS); NON_CYTOPLASMIC_DOMAIN (PHOBIUS); CYTOPLASMIC_DOMAIN (PHOBIUS); NON_CYTOPLASMIC_DOMAIN (PHOBIUS); TRANSMEMBRANE (PHOBIUS); TRANSMEMBRANE (PHOBIUS); IPR001879 (PROSITE_PROFILES); IPR017981 (PROSITE_PROFILES); IPR000203 (PROSITE_PROFILES); SSF111418 (SUPERFAMILY); TMhelix (TMHMM); TMhelix (TMHMM) |
| 2021 | c40485_g1_i3_len_3315_path_3596_0_379_3<br>976_380_406_4003_407_675_7154_676_68<br>2_4279_683_717_4314_7_1   | 233 | latrophilin- partial          | 1105 | 1.79E-98  | 52.20% | 0.147 | IPR000832 (PRINTS); IPR000203 (SMART); IPR001879 (SMART); IPR001879 (PFAM); IPR000203 (PFAM); IPR000832 (PFAM); PTHR12011 (PANTHER); TRANSMEMBRANE (PHOBIUS); CYTOPLASMIC_DOMAIN (PHOBIUS); NON_CYTOPLASMIC_DOMAIN (PHOBIUS); CYTOPLASMIC_DOMAIN (PHOBIUS); NON_CYTOPLASMIC_DOMAIN (PHOBIUS); TRANSMEMBRANE (PHOBIUS); NON_CYTOPLASMIC_DOMAIN (PHOBIUS); TRANSMEMBRANE (PHOBIUS); TRANSMEMBRANE (PHOBIUS); TRANSMEMBRANE (PHOBIUS); IPR000203 (PROSITE_PROFILES); IPR001879 (PROSITE_PROFILES); IPR017981 (PROSITE_PROFILES); SSF111418 (SUPERFAMILY); TMhelix (TMHMM); TMhelix (TMHMM); TMhelix (TMHMM); TMhelix (TMHMM); TMhelix (TMHMM); TMhelix (TMHMM)                                                                                                                                                                       |



[illegible]

|      |                                                                                                       |      |                                                               |      |          |        |        |                                                                                                                                                                                                                                                                                                                                                                                                                                                                                                                                                                                            |                                                                                                                                                                                                                                                                                                                                                                                                                                                                                                                                                                                                                                                                                                                                                                                                                                                                                                                                                                                                                                                                                                                                                                                                                                                                                                                                                                                                                                                                                                                                                                                                                                                                                                                                                                                                                                                                                                                                                        |
|------|-------------------------------------------------------------------------------------------------------|------|---------------------------------------------------------------|------|----------|--------|--------|--------------------------------------------------------------------------------------------------------------------------------------------------------------------------------------------------------------------------------------------------------------------------------------------------------------------------------------------------------------------------------------------------------------------------------------------------------------------------------------------------------------------------------------------------------------------------------------------|--------------------------------------------------------------------------------------------------------------------------------------------------------------------------------------------------------------------------------------------------------------------------------------------------------------------------------------------------------------------------------------------------------------------------------------------------------------------------------------------------------------------------------------------------------------------------------------------------------------------------------------------------------------------------------------------------------------------------------------------------------------------------------------------------------------------------------------------------------------------------------------------------------------------------------------------------------------------------------------------------------------------------------------------------------------------------------------------------------------------------------------------------------------------------------------------------------------------------------------------------------------------------------------------------------------------------------------------------------------------------------------------------------------------------------------------------------------------------------------------------------------------------------------------------------------------------------------------------------------------------------------------------------------------------------------------------------------------------------------------------------------------------------------------------------------------------------------------------------------------------------------------------------------------------------------------------------|
|      |                                                                                                       |      |                                                               |      |          |        |        |                                                                                                                                                                                                                                                                                                                                                                                                                                                                                                                                                                                            | TRANSMEMBRANE (PHOBIUS); TRANSMEMBRANE (PHOBIUS);<br>TRANSMEMBRANE (PHOBIUS); TRANSMEMBRANE (PHOBIUS);<br>CYTOPLASMIC_DOMAIN (PHOBIUS); CYTOPLASMIC_DOMAIN (PHOBIUS);<br>TRANSMEMBRANE (PHOBIUS); TRANSMEMBRANE (PHOBIUS);<br>NON_CYTOPLASMIC_DOMAIN (PHOBIUS); CYTOPLASMIC_DOMAIN<br>(PHOBIUS); CYTOPLASMIC_DOMAIN (PHOBIUS); CYTOPLASMIC_DOMAIN<br>(PHOBIUS); NON_CYTOPLASMIC_DOMAIN (PHOBIUS);<br>NON_CYTOPLASMIC_DOMAIN (PHOBIUS); NON_CYTOPLASMIC_DOMAIN<br>(PHOBIUS); TRANSMEMBRANE (PHOBIUS); CYTOPLASMIC_DOMAIN<br>(PHOBIUS); NON_CYTOPLASMIC_DOMAIN (PHOBIUS);<br>NON_CYTOPLASMIC_DOMAIN (PHOBIUS); NON_CYTOPLASMIC_DOMAIN<br>(PHOBIUS); TRANSMEMBRANE (PHOBIUS); SIGNAL_PEPTIDE_N_REGION<br>(PHOBIUS); CYTOPLASMIC_DOMAIN (PHOBIUS); TRANSMEMBRANE<br>(PHOBIUS); NON_CYTOPLASMIC_DOMAIN (PHOBIUS);<br>NON_CYTOPLASMIC_DOMAIN (PHOBIUS); CYTOPLASMIC_DOMAIN<br>(PHOBIUS); TRANSMEMBRANE (PHOBIUS); CYTOPLASMIC_DOMAIN<br>(PHOBIUS); TRANSMEMBRANE (PHOBIUS); NON_CYTOPLASMIC_DOMAIN<br>(PHOBIUS); CYTOPLASMIC_DOMAIN (PHOBIUS); CYTOPLASMIC_DOMAIN<br>(PHOBIUS); TRANSMEMBRANE (PHOBIUS); TRANSMEMBRANE (PHOBIUS);<br>TRANSMEMBRANE (PHOBIUS); NON_CYTOPLASMIC_DOMAIN (PHOBIUS);<br>NON_CYTOPLASMIC_DOMAIN (PHOBIUS); CYTOPLASMIC_DOMAIN<br>(PHOBIUS); TRANSMEMBRANE (PHOBIUS); TRANSMEMBRANE (PHOBIUS);<br>CYTOPLASMIC_DOMAIN (PHOBIUS); TRANSMEMBRANE (PHOBIUS);<br>CYTOPLASMIC_DOMAIN (PHOBIUS); CYTOPLASMIC_DOMAIN (PHOBIUS);<br>SIGNAL_PEPTIDE_H_REGION (PHOBIUS); NON_CYTOPLASMIC_DOMAIN<br>(PHOBIUS); TRANSMEMBRANE (PHOBIUS); TRANSMEMBRANE (PHOBIUS);<br>TRANSMEMBRANE (PHOBIUS); CYTOPLASMIC_DOMAIN (PHOBIUS);<br>NON_CYTOPLASMIC_DOMAIN (PHOBIUS); CYTOPLASMIC_DOMAIN<br>(PHOBIUS); TRANSMEMBRANE (PHOBIUS); TRANSMEMBRANE (PHOBIUS);<br>NON_CYTOPLASMIC_DOMAIN (PHOBIUS); SIGNAL_PEPTIDE_C_REGION<br>(PHOBIUS); TRANSMEMBRANE (PHOBIUS); TRANSMEMBRANE (PHOBIUS);<br><del>TRANSMEMBRANE (PHOBIUS); TRANSMEMBRANE (PHOBIUS);</del> |
| 2024 | c40493_g2_i4_len_7556_path_11261_0_125_11386_126_522_6042_523_607_11866_608_620_26682_621_632_11890_4 | 6008 | PREDICTED: acrosin-like                                       | 2519 | 3.59E-09 | 43.75% | 0.355Y |                                                                                                                                                                                                                                                                                                                                                                                                                                                                                                                                                                                            |                                                                                                                                                                                                                                                                                                                                                                                                                                                                                                                                                                                                                                                                                                                                                                                                                                                                                                                                                                                                                                                                                                                                                                                                                                                                                                                                                                                                                                                                                                                                                                                                                                                                                                                                                                                                                                                                                                                                                        |
| 2025 | c40494_g2_i1_len_1329_path_16986_0_1016_18003_1017_1019_18006_1020_1220_1820_7_1221_1274_18207_1275_0 | 287  | tpa: low quality protein: transglutaminase                    | 443  | 9.30E-07 | 45.00% | 0.119  | no IPS match                                                                                                                                                                                                                                                                                                                                                                                                                                                                                                                                                                               |                                                                                                                                                                                                                                                                                                                                                                                                                                                                                                                                                                                                                                                                                                                                                                                                                                                                                                                                                                                                                                                                                                                                                                                                                                                                                                                                                                                                                                                                                                                                                                                                                                                                                                                                                                                                                                                                                                                                                        |
| 2026 | c40495_g1_i1_len_1461_path_1405_0_620_2_026_621_623_2029_624_653_5517_654_655_3026_656_1460_3         | 330  | low-density lipoprotein receptor-related protein 4 isoform x2 | 487  | 7.02E-16 | 57.20% | 0.207  | IPR002172 (PRINTS); IPR002172 (SMART); IPR002172 (G3DSA:4.10.400.GENE3D); IPR002172 (G3DSA:4.10.400.GENE3D); IPR002172 (PFAM); PTHR10529 (PANTHER); IPR023415 (PROSITE_PATTERNS); IPR023415 (PROSITE_PATTERNS); TRANSMEMBRANE (PHOBIUS); NON_CYTOPLASMIC_DOMAIN (PHOBIUS); TRANSMEMBRANE (PHOBIUS); CYTOPLASMIC_DOMAIN (PHOBIUS); TRANSMEMBRANE (PHOBIUS); NON_CYTOPLASMIC_DOMAIN (PHOBIUS); CYTOPLASMIC_DOMAIN (PHOBIUS); IPR002172 (PROSITE_PROFILES); IPR002172 (PROSITE_PROFILES); IPR002172 (SUPERFAMILY); IPR002172 (SUPERFAMILY); TMhelix (TMHMM); TMhelix (TMHMM); TMhelix (TMHMM) |                                                                                                                                                                                                                                                                                                                                                                                                                                                                                                                                                                                                                                                                                                                                                                                                                                                                                                                                                                                                                                                                                                                                                                                                                                                                                                                                                                                                                                                                                                                                                                                                                                                                                                                                                                                                                                                                                                                                                        |
| 2027 | c40495_g1_i2_len_1427_path_1405_0_620_2_026_621_623_2029_624_653_5517_654_655_2061_656_1426_5         | 609  | scp-like extracellular domain containing protein 1            | 475  | 6.76E-37 | 49.60% | 0.1    | IPR002413 (PRINTS); IPR001283 (PRINTS); IPR014044 (SMART); IPR002172 (SMART); IPR002172 (G3DSA:4.10.400.GENE3D); IPR002172 (PFAM); IPR014044 (G3DSA:3.40.33.GENE3D); IPR014044 (PFAM); IPR002172 (G3DSA:4.10.400.GENE3D); IPR001283 (PANTHER); IPR018244 (PROSITE_PATTERNS); IPR023415 (PROSITE_PATTERNS); IPR023415 (PROSITE_PATTERNS); NON_CYTOPLASMIC_DOMAIN (PHOBIUS); CYTOPLASMIC_DOMAIN (PHOBIUS); TRANSMEMBRANE (PHOBIUS); IPR002172 (PROSITE_PROFILES); IPR002172 (PROSITE_PROFILES); IPR002172 (SUPERFAMILY); IPR014044 (SUPERFAMILY); IPR002172 (SUPERFAMILY); TMhelix (TMHMM)   |                                                                                                                                                                                                                                                                                                                                                                                                                                                                                                                                                                                                                                                                                                                                                                                                                                                                                                                                                                                                                                                                                                                                                                                                                                                                                                                                                                                                                                                                                                                                                                                                                                                                                                                                                                                                                                                                                                                                                        |
| 2028 | c40495_g1_i3_len_929_path_5237_0_155_55_17_156_157_2061_158_928_5                                     | 171  | scp-like extracellular domain containing protein 1            | 309  | 5.08E-38 | 49.10% | 0.1    | IPR001283 (PRINTS); IPR002413 (PRINTS); IPR014044 (SMART); IPR014044 (G3DSA:3.40.33.GENE3D); IPR014044 (PFAM); IPR001283 (PANTHER); IPR018244 (PROSITE_PATTERNS); IPR014044 (SUPERFAMILY)                                                                                                                                                                                                                                                                                                                                                                                                  |                                                                                                                                                                                                                                                                                                                                                                                                                                                                                                                                                                                                                                                                                                                                                                                                                                                                                                                                                                                                                                                                                                                                                                                                                                                                                                                                                                                                                                                                                                                                                                                                                                                                                                                                                                                                                                                                                                                                                        |





|      |                                                                                                         |      |                                               |      |           |        |        |  |                                                                                                                                                                                                                                                                                                                                                                                                                                                                                                                                                                                                                                                                                                                                                                                                                                                                                                                                                                                                                                                                                                                |
|------|---------------------------------------------------------------------------------------------------------|------|-----------------------------------------------|------|-----------|--------|--------|--|----------------------------------------------------------------------------------------------------------------------------------------------------------------------------------------------------------------------------------------------------------------------------------------------------------------------------------------------------------------------------------------------------------------------------------------------------------------------------------------------------------------------------------------------------------------------------------------------------------------------------------------------------------------------------------------------------------------------------------------------------------------------------------------------------------------------------------------------------------------------------------------------------------------------------------------------------------------------------------------------------------------------------------------------------------------------------------------------------------------|
|      |                                                                                                         |      |                                               |      |           |        |        |  | Coil (COILS); Coil (COILS); Coil (COILS); Coil (COILS); Coil (COILS); Coil (COILS);<br>Coil (COILS); Coil (COILS); Coil (COILS); Coil (COILS); Coil (COILS); Coil (COILS);<br>Coil (COILS); IPR003108 (SMART); IPR002048 (SMART); IPR018159 (SMART);<br>IPR002017 (PFAM); IPR003108 (PFAM); IPR003108 (G3DSA:3.30.920.GENE3D);<br>IPR011992 (PFAM); G3DSA:1.20.58.60 (GENE3D); G3DSA:1.20.58.60 (GENE3D);<br>G3DSA:1.20.58.60 (GENE3D); IPR011992 (G3DSA:1.10.238.GENE3D);<br>G3DSA:1.20.58.60 (GENE3D); G3DSA:1.20.58.60 (GENE3D); PTHR11915<br>(PANTHER); PTHR11915:SF212 (PANTHER); IPR018247 (PROSITE_PATTERNS);<br>IPR002048 (PROSITE_PROFILES); IPR003108 (PROSITE_PROFILES);<br>IPR002048 (PROSITE_PROFILES); SSF46966 (SUPERFAMILY); IPR003108<br>(SUPERFAMILY); SSF46966 (SUPERFAMILY); SSF46966 (SUPERFAMILY);<br>SSF46966 (SUPERFAMILY); SSF46966 (SUPERFAMILY); SSF46966<br>(SUPERFAMILY); SSF46966 (SUPERFAMILY); SSF46966 (SUPERFAMILY);<br>SSF46966 (SUPERFAMILY); SSF46966 (SUPERFAMILY); SSF46966<br>(SUPERFAMILY); SSF47473 (SUPERFAMILY); SSF46966 (SUPERFAMILY);<br>SSF46966 (SUPERFAMILY) |
| 2036 | c40548_g1_i8_len_9989_path_11401_0_6447_17848_6448_6516_1841_6517_6618_18016__6619_7142_18540__1        | 5511 | microtubule-actin cross-linking factor 1-like | 3330 | 0         | 74.80% | 0.1    |  |                                                                                                                                                                                                                                                                                                                                                                                                                                                                                                                                                                                                                                                                                                                                                                                                                                                                                                                                                                                                                                                                                                                |
| 2037 | c40557_g1_i1_len_2018_path_2877_0_81_18_1_82_208_464_209_2017_2                                         | 647  | cytochrome p450 partial                       | 672  | 1.83E-131 | 59.50% | 0.104  |  | IPR001128 (PRINTS); IPR002401 (PRINTS); IPR001128<br>(G3DSA:1.10.630.GENE3D); IPR001128 (PFAM); PTHR24292:SF24 (PANTHER);<br>PTHR24292 (PANTHER); IPR017972 (PROSITE_PATTERNS);<br>TRANSMEMBRANE (PHOBIUS); TRANSMEMBRANE (PHOBIUS);<br>CYTOPLASMIC_DOMAIN (PHOBIUS); CYTOPLASMIC_DOMAIN (PHOBIUS);<br>NON_CYTOPLASMIC_DOMAIN (PHOBIUS); IPR001128 (SUPERFAMILY); TMhelix<br>(TMHMM)                                                                                                                                                                                                                                                                                                                                                                                                                                                                                                                                                                                                                                                                                                                           |
| 2038 | c40557_g1_i2_len_2174_path_2877_0_81_18_1_82_208_308_209_269_369_270_276_376_277_364_464_365_2173_2     | 677  | cytochrome p450 partial                       | 724  | 8.46E-131 | 59.70% | 0.104  |  | IPR002401 (PRINTS); IPR001128 (PRINTS); IPR001128 (PFAM); IPR001128<br>(G3DSA:1.10.630.GENE3D); PTHR24292 (PANTHER); PTHR24292:SF24<br>(PANTHER); IPR017972 (PROSITE_PATTERNS); TRANSMEMBRANE<br>(PHOBIUS); NON_CYTOPLASMIC_DOMAIN (PHOBIUS); TRANSMEMBRANE<br>(PHOBIUS); CYTOPLASMIC_DOMAIN (PHOBIUS); CYTOPLASMIC_DOMAIN<br>(PHOBIUS); IPR001128 (SUPERFAMILY); TMhelix (TMHMM)                                                                                                                                                                                                                                                                                                                                                                                                                                                                                                                                                                                                                                                                                                                              |
| 2039 | c40557_g1_i3_len_1891_path_2877_0_81_46_4_82_1890_1                                                     | 673  | cytochrome p450 partial                       | 630  | 5.12E-132 | 59.60% | 0.267  |  | IPR002401 (PRINTS); IPR001128 (PRINTS); IPR001128 (PFAM); IPR001128<br>(G3DSA:1.10.630.GENE3D); PTHR24292 (PANTHER); PTHR24292:SF24<br>(PANTHER); IPR017972 (PROSITE_PATTERNS); TRANSMEMBRANE<br>(PHOBIUS); NON_CYTOPLASMIC_DOMAIN (PHOBIUS);<br>CYTOPLASMIC_DOMAIN (PHOBIUS); TRANSMEMBRANE (PHOBIUS);<br>CYTOPLASMIC_DOMAIN (PHOBIUS); NON_CYTOPLASMIC_DOMAIN<br>(PHOBIUS); TRANSMEMBRANE (PHOBIUS); IPR001128 (SUPERFAMILY);<br>TMhelix (TMHMM)                                                                                                                                                                                                                                                                                                                                                                                                                                                                                                                                                                                                                                                             |
| 2040 | c40567_g1_i2_len_1510_path_1605_0_488_2_094_489_491_2097_492_561_2167_562_564_2170_565_1093_2699_109_4  | 1493 | protein kiaa1199-like                         | 503  | 4.96E-20  | 44.30% | 0.134  |  | IPR025155 (PFAM); TRANSMEMBRANE (PHOBIUS);<br>NON_CYTOPLASMIC_DOMAIN (PHOBIUS); CYTOPLASMIC_DOMAIN<br>(PHOBIUS); TMhelix (TMHMM); TMhelix (TMHMM); TMhelix (TMHMM)                                                                                                                                                                                                                                                                                                                                                                                                                                                                                                                                                                                                                                                                                                                                                                                                                                                                                                                                             |
| 2041 | c40567_g2_i1_len_1668_path_5333_0_469_5_798_470_470_3708_471_1095_2699_1096_1_138_4240_1139_1374_3833_4 | 1069 | cartilage intermediate layer protein 2-like   | 556  | 5.65E-18  | 43.60% | 0.28   |  | IPR025155 (PFAM); NON_CYTOPLASMIC_DOMAIN (PHOBIUS);<br>CYTOPLASMIC_DOMAIN (PHOBIUS); TRANSMEMBRANE (PHOBIUS); TMhelix<br>(TMHMM)                                                                                                                                                                                                                                                                                                                                                                                                                                                                                                                                                                                                                                                                                                                                                                                                                                                                                                                                                                               |
| 2042 | c40575_g1_i1_len_2074_path_2102_0_169_2_272_170_197_2300__198_703_5320_704_70_6_2809_707_1447_35_1      | 1477 | spermine oxidase                              | 691  | 3.69E-116 | 51.60% | 0.388Y |  | G3DSA:3.50.50.60 (GENE3D); IPR002937 (PFAM); IPR011032<br>(G3DSA:3.90.180.GENE3D); G3DSA:3.90.660.10 (GENE3D); PTHR10742<br>(PANTHER); PTHR10742:SF255 (PANTHER); CYTOPLASMIC_DOMAIN<br>(PHOBIUS); NON_CYTOPLASMIC_DOMAIN (PHOBIUS); TRANSMEMBRANE<br>(PHOBIUS); NON_CYTOPLASMIC_DOMAIN (PHOBIUS); TRANSMEMBRANE<br>(PHOBIUS); SSF51905 (SUPERFAMILY); SSF54373 (SUPERFAMILY); TMhelix<br>(TMHMM)                                                                                                                                                                                                                                                                                                                                                                                                                                                                                                                                                                                                                                                                                                              |
| 2043 | c40575_g1_i2_len_2111_path_2102_0_169_2_272_170_197_2300__198_703_2806_704_70_6_2809_707_1447_55_1      | 1244 | spermine oxidase                              | 704  | 6.17E-74  | 49.80% | 0.388Y |  | IPR002937 (PFAM); IPR011032 (G3DSA:3.90.180.GENE3D); G3DSA:3.50.50.60<br>(GENE3D); PTHR10742 (PANTHER); PTHR10742:SF255 (PANTHER);<br>CYTOPLASMIC_DOMAIN (PHOBIUS); TRANSMEMBRANE (PHOBIUS);<br>TRANSMEMBRANE (PHOBIUS); NON_CYTOPLASMIC_DOMAIN (PHOBIUS);<br>NON_CYTOPLASMIC_DOMAIN (PHOBIUS); SSF51905 (SUPERFAMILY); TMhelix<br>(TMHMM)                                                                                                                                                                                                                                                                                                                                                                                                                                                                                                                                                                                                                                                                                                                                                                     |
| 2044 | c40575_g1_i3_len_1992_path_4723_0_87_22_72_88_115_2300__116_621_2806_622_624_2809_625_1365_3548_0       | 1491 | spermine oxidase                              | 664  | 2.23E-117 | 51.50% | 0.105  |  | IPR002937 (PFAM); G3DSA:3.90.660.10 (GENE3D); G3DSA:3.50.50.60<br>(GENE3D); PTHR10742:SF255 (PANTHER); PTHR10742 (PANTHER);<br>NON_CYTOPLASMIC_DOMAIN (PHOBIUS); TRANSMEMBRANE (PHOBIUS);<br>TRANSMEMBRANE (PHOBIUS); CYTOPLASMIC_DOMAIN (PHOBIUS);<br>NON_CYTOPLASMIC_DOMAIN (PHOBIUS); SSF51905 (SUPERFAMILY);<br>SSF54373 (SUPERFAMILY); TMhelix (TMHMM)                                                                                                                                                                                                                                                                                                                                                                                                                                                                                                                                                                                                                                                                                                                                                    |

|      |                                                                                                               |       |                                 |      |           |        |       |                                                                                                                                                                                                                                                                                                                                                                                                                                                                                                                                                          |
|------|---------------------------------------------------------------------------------------------------------------|-------|---------------------------------|------|-----------|--------|-------|----------------------------------------------------------------------------------------------------------------------------------------------------------------------------------------------------------------------------------------------------------------------------------------------------------------------------------------------------------------------------------------------------------------------------------------------------------------------------------------------------------------------------------------------------------|
| 2045 | c40578_g1_i1_len_1726_path_6447_0_517_6<br>960_518_652_1052_653_1053_654_757<br>_8357_758_762_7196_763_0      | 66705 | cathepsin partial               | 576  | 2.69E-143 | 74.50% | 0.105 | IPR000668 (PRINTS); IPR000668 (SMART); IPR013201 (SMART); G3DSA:3.90.70.10 (GENE3D); IPR000668 (PFAM); IPR013201 (PFAM); PTHR12411:SF57 (PANTHER); IPR013128 (PANTHER); IPR025660 (PROSITE_PATTERNS); IPR000169 (PROSITE_PATTERNS); IPR025661 (PROSITE_PATTERNS); NON_CYTOPLASMIC_DOMAIN (PHOBIUS); TRANSMEMBRANE (PHOBIUS); CYTOPLASMIC_DOMAIN (PHOBIUS); SSF54001 (SUPERFAMILY)                                                                                                                                                                        |
| 2046 | c40578_g1_i2_len_2364_path_6447_0_517_6<br>960_518_652_1052_653_1053_654_757<br>_4509_758_800_4552_801_0      | 63087 | cathepsin partial               | 788  | 2.42E-138 | 73.30% | 0.105 | IPR000668 (PRINTS); IPR000668 (SMART); IPR013201 (SMART); G3DSA:3.90.70.10 (GENE3D); IPR013201 (PFAM); IPR000668 (PFAM); PTHR12411:SF57 (PANTHER); IPR013128 (PANTHER); IPR025660 (PROSITE_PATTERNS); IPR025661 (PROSITE_PATTERNS); IPR000169 (PROSITE_PATTERNS); TRANSMEMBRANE (PHOBIUS); NON_CYTOPLASMIC_DOMAIN (PHOBIUS); TRANSMEMBRANE (PHOBIUS); NON_CYTOPLASMIC_DOMAIN (PHOBIUS); CYTOPLASMIC_DOMAIN (PHOBIUS); SSF54001 (SUPERFAMILY)                                                                                                             |
| 2047 | c40583_g1_i1_len_2771_path_10171_0_1081<br>_9094_1082_1107_7434_1108_1512_1454_1<br>513_1536_7862_1537_1543_4 | 3909  | chitin-binding protein          | 924  | 6.16E-69  | 41.10% | 0.098 | IPR002557 (SMART); IPR002557 (G3DSA:2.170.140.GENE3D); IPR002557 (PFAM); PTHR23301 (PANTHER); PTHR23301:SF0 (PANTHER); CYTOPLASMIC_DOMAIN (PHOBIUS); TRANSMEMBRANE (PHOBIUS); NON_CYTOPLASMIC_DOMAIN (PHOBIUS); IPR002557 (PROSITE_PROFILES); IPR002557 (PROSITE_PROFILES); IPR002557 (PROSITE_PROFILES); IPR002557 (PROSITE_PROFILES); IPR002557 (PROSITE_PROFILES); IPR002557 (PROSITE_PROFILES); IPR002557 (SUPERFAMILY); IPR002557 (SUPERFAMILY); IPR002557 (SUPERFAMILY); IPR002557 (SUPERFAMILY); IPR002557 (SUPERFAMILY); IPR002557 (SUPERFAMILY) |
| 2048 | c40598_g1_i1_len_1928_path_2235_0_1157_3392_1158_1169_172_1170_1452_4560_14_53_1526_3754_1527_153_1           | 421   | hypothetical protein L798_00519 | 643  | 1.08E-69  | 50.80% | 0.248 | IPR008930 (G3DSA:1.50.10.GENE3D); IPR002157 (PFAM); IPR002157 (PANTHER); PTHR10559:SF12 (PANTHER); CYTOPLASMIC_DOMAIN (PHOBIUS); TRANSMEMBRANE (PHOBIUS); NON_CYTOPLASMIC_DOMAIN (PHOBIUS); IPR008930 (SUPERFAMILY); TMhelix (TMHMM)                                                                                                                                                                                                                                                                                                                     |
| 2049 | c40598_g1_i2_len_1941_path_2235_0_1157_3392_1158_1169_172_1170_1452_4560_14_53_1526_3754_1527_153_1           | 457   | hypothetical protein L798_00519 | 647  | 1.01E-69  | 50.80% | 0.248 | IPR002157 (PFAM); IPR008930 (G3DSA:1.50.10.GENE3D); IPR002157 (PANTHER); PTHR10559:SF12 (PANTHER); CYTOPLASMIC_DOMAIN (PHOBIUS); TRANSMEMBRANE (PHOBIUS); NON_CYTOPLASMIC_DOMAIN (PHOBIUS); IPR008930 (SUPERFAMILY); TMhelix (TMHMM)                                                                                                                                                                                                                                                                                                                     |
| 2050 | c40600_g1_i1_len_3335_path_3769_0_3334_1                                                                      | 5274  | serine proteinase stubble       | 1112 | 2.03E-103 | 61.90% | 0.233 | Coil (COILS); IPR001314 (PRINTS); IPR001254 (SMART); G3DSA:2.40.10.10 (GENE3D); G3DSA:2.40.10.10 (GENE3D); IPR001254 (PFAM); PTHR24268 (PANTHER); PTHR24268:SF95 (PANTHER); IPR018114 (PROSITE_PATTERNS); CYTOPLASMIC_DOMAIN (PHOBIUS); TRANSMEMBRANE (PHOBIUS); TRANSMEMBRANE (PHOBIUS); CYTOPLASMIC_DOMAIN (PHOBIUS); TRANSMEMBRANE (PHOBIUS); NON_CYTOPLASMIC_DOMAIN (PHOBIUS); NON_CYTOPLASMIC_DOMAIN (PHOBIUS); TRANSMEMBRANE (PHOBIUS); CYTOPLASMIC_DOMAIN (PHOBIUS); IPR001254 (PROSITE_PROFILES); IPR009003 (SUPERFAMILY)                        |
| 2051 | c40606_g1_i2_len_1803_path_2171_0_288_2<br>459_289_297_1892_298_565_1383_566_680<br>_2847_681_839_3006_840_4  | 583   | fasciclin-3 isoform x2          | 601  | 9.29E-41  | 47.80% | 0.256 | IPR003599 (SMART); IPR013783 (G3DSA:2.60.40.GENE3D); IPR013098 (PFAM); IPR013162 (PFAM); IPR013783 (G3DSA:2.60.40.GENE3D); PTHR11640:SF52 (PANTHER); PTHR11640 (PANTHER); CYTOPLASMIC_DOMAIN (PHOBIUS); NON_CYTOPLASMIC_DOMAIN (PHOBIUS); TRANSMEMBRANE (PHOBIUS); IPR007110 (PROSITE_PROFILES); IPR007110 (PROSITE_PROFILES); SSF48726 (SUPERFAMILY); SSF48726 (SUPERFAMILY); TMhelix (TMHMM)                                                                                                                                                           |
| 2052 | c40606_g1_i3_len_1599_path_1021_0_361_1<br>383_362_476_2847_477_635_3006_636_759<br>_8386_760_760_5076_761_4  | 295   | fasciclin-3 isoform x1          | 533  | 1.67E-55  | 48.10% | 0.256 | Coil (COILS); IPR003599 (SMART); IPR013783 (G3DSA:2.60.40.GENE3D); IPR013098 (PFAM); IPR013162 (PFAM); IPR013783 (G3DSA:2.60.40.GENE3D); PTHR11640:SF52 (PANTHER); PTHR11640 (PANTHER); NON_CYTOPLASMIC_DOMAIN (PHOBIUS); CYTOPLASMIC_DOMAIN (PHOBIUS); TRANSMEMBRANE (PHOBIUS); IPR007110 (PROSITE_PROFILES); IPR007110 (PROSITE_PROFILES); SSF48726 (SUPERFAMILY); SSF48726 (SUPERFAMILY); TMhelix (TMHMM)                                                                                                                                             |
| 2053 | c40608_g1_i1_len_3572_path_53_0_187_241<br>_188_191_245_192_3571_2                                            | 6550  | preamylyase 1                   | 1183 | 0         | 76.60% | 0.1   | Coil (COILS); IPR006046 (PRINTS); IPR006048 (SMART); IPR006589 (SMART); IPR006048 (PFAM); IPR006047 (PFAM); IPR013780 (G3DSA:2.60.40.GENE3D); IPR013781 (G3DSA:3.20.20.GENE3D); PTHR10357:SF116 (PANTHER); IPR015902 (PANTHER); NON_CYTOPLASMIC_DOMAIN (PHOBIUS); CYTOPLASMIC_DOMAIN (PHOBIUS); TRANSMEMBRANE (PHOBIUS); IPR017853 (SUPERFAMILY); SSF51011 (SUPERFAMILY); TMhelix (TMHMM)                                                                                                                                                                |

|      |                                                                                                        |      |                                                         |      |          |        |       |                                                                                                                                                                                                                                                                                                                                                                                                                                                                                                                                                                                                                                                                                                                                                                                                                                                                                                                       |
|------|--------------------------------------------------------------------------------------------------------|------|---------------------------------------------------------|------|----------|--------|-------|-----------------------------------------------------------------------------------------------------------------------------------------------------------------------------------------------------------------------------------------------------------------------------------------------------------------------------------------------------------------------------------------------------------------------------------------------------------------------------------------------------------------------------------------------------------------------------------------------------------------------------------------------------------------------------------------------------------------------------------------------------------------------------------------------------------------------------------------------------------------------------------------------------------------------|
| 2054 | c40616_g1_i1_len_545_path_201_0_178_380_179_213_4307_214_226_4320_227_342_44_36_343_374_4468_375_402_2 | 96   | plasminogen precursor                                   | 181  | 5.27E-22 | 58.60% | 0.179 | PR00018 (PRINTS); IPR000001 (SMART); G3DSA:2.40.20.10 (GENE3D); IPR000001 (PFAM); PTHR24272 (PANTHER); IPR018056 (PROSITE_PATTERNS); IPR000001 (PROSITE_PROFILES); IPR013806 (SUPERFAMILY)                                                                                                                                                                                                                                                                                                                                                                                                                                                                                                                                                                                                                                                                                                                            |
| 2055 | c40616_g2_i1_len_3206_path_4320_0_115_7_640_116_147_4468_148_175_4495_176_984_5301_985_1044_74_10_0    | 628  | plasminogen-like isoform x1                             | 1069 | 3.41E-95 | 49.50% | 0.112 | PR00018 (PRINTS); IPR000001 (SMART); IPR000001 (PFAM); G3DSA:2.40.20.10 (GENE3D); IPR022041 (PFAM); PTHR24259 (PANTHER); PTHR24259:SF70 (PANTHER); IPR018056 (PROSITE_PATTERNS); IPR018056 (PROSITE_PATTERNS); IPR018056 (PROSITE_PATTERNS); IPR018056 (PROSITE_PATTERNS); CYTOPLASMIC_DOMAIN (PHOBIUS); NON_CYTOPLASMIC_DOMAIN (PHOBIUS); TRANSMEMBRANE (PHOBIUS); TRANSMEMBRANE (PHOBIUS); NON_CYTOPLASMIC_DOMAIN (PHOBIUS); IPR000001 (PROSITE_PROFILES); IPR000001 (PROSITE_PROFILES); IPR000001 (PROSITE_PROFILES); IPR000001 (PROSITE_PROFILES); IPR013806 (SUPERFAMILY); IPR013806 (SUPERFAMILY); IPR013806 (SUPERFAMILY); IPR013806 (SUPERFAMILY); TMhelix (TMHMM); TMhelix (TMHMM)                                                                                                                                                                                                                           |
| 2056 | c40616_g2_i2_len_3146_path_4320_0_115_7_640_116_147_4468_148_175_4495_176_984_74_985_1737_6112_17_0    | 618  | plasminogen-like isoform x1                             | 1049 | 6.31E-98 | 51.70% | 0.112 | PR00018 (PRINTS); IPR000001 (SMART); IPR022041 (PFAM); IPR000001 (PFAM); G3DSA:2.40.20.10 (GENE3D); PTHR24259 (PANTHER); PTHR24259:SF70 (PANTHER); IPR018056 (PROSITE_PATTERNS); IPR018056 (PROSITE_PATTERNS); IPR018056 (PROSITE_PATTERNS); IPR018056 (PROSITE_PATTERNS); NON_CYTOPLASMIC_DOMAIN (PHOBIUS); TRANSMEMBRANE (PHOBIUS); TRANSMEMBRANE (PHOBIUS); NON_CYTOPLASMIC_DOMAIN (PHOBIUS); CYTOPLASMIC_DOMAIN (PHOBIUS); IPR000001 (PROSITE_PROFILES); IPR000001 (PROSITE_PROFILES); IPR000001 (PROSITE_PROFILES); IPR000001 (PROSITE_PROFILES); IPR013806 (SUPERFAMILY); IPR013806 (SUPERFAMILY); IPR013806 (SUPERFAMILY); IPR013806 (SUPERFAMILY); TMhelix (TMHMM); TMhelix (TMHMM)                                                                                                                                                                                                                           |
| 2057 | c40627_g1_i1_len_2002_path_1982_0_153_2_136_154_177_2160_178_470_2451_471_47_4_2455_475_1756_3735_4    | 3777 | glycosyl-phosphatidylinositol-linked carbonic anhydrase | 667  | 1.71E-67 | 57.90% | 0.122 | IPR001148 (SMART); IPR001148 (PFAM); IPR001148 (G3DSA:3.10.200.GENE3D); IPR023561 (PANTHER); IPR018338 (PROSITE_PATTERNS); CYTOPLASMIC_DOMAIN (PHOBIUS); TRANSMEMBRANE (PHOBIUS); NON_CYTOPLASMIC_DOMAIN (PHOBIUS); TRANSMEMBRANE (PHOBIUS); NON_CYTOPLASMIC_DOMAIN (PHOBIUS); IPR001148 (PROSITE_PROFILES); IPR001148 (SUPERFAMILY)                                                                                                                                                                                                                                                                                                                                                                                                                                                                                                                                                                                  |
| 2058 | c40674_g1_i1_len_546_path_1797_0_97_123_2_98_167_902_168_218_953_219_222_957_223_243_978_244_287_276_1 | 2965 | serine protease inhibitor dipetalogastin-like           | 182  | 8.40E-16 | 51.30% | 0.299 | IPR002350 (SMART); G3DSA:3.30.60.30 (GENE3D); IPR002350 (PFAM); PTHR10913:SF46 (PANTHER); PTHR10913 (PANTHER); IPR002350 (PROSITE_PROFILES); IPR002350 (PROSITE_PROFILES); SSF100895 (SUPERFAMILY); SSF100895 (SUPERFAMILY)                                                                                                                                                                                                                                                                                                                                                                                                                                                                                                                                                                                                                                                                                           |
| 2059 | c40682_g1_i1_len_3471_path_105_0_387_49_3_388_393_499_394_539_645_540_548_654_549_911_1017_912_91_3    | 3451 | agap011476-pa-like protein                              | 1157 | 5.22E-73 | 44.80% | 0.21  | TRANSMEMBRANE (PHOBIUS); CYTOPLASMIC_DOMAIN (PHOBIUS); TRANSMEMBRANE (PHOBIUS); TRANSMEMBRANE (PHOBIUS); NON_CYTOPLASMIC_DOMAIN (PHOBIUS); CYTOPLASMIC_DOMAIN (PHOBIUS); NON_CYTOPLASMIC_DOMAIN (PHOBIUS); TRANSMEMBRANE (PHOBIUS); TRANSMEMBRANE (PHOBIUS); TRANSMEMBRANE (PHOBIUS); NON_CYTOPLASMIC_DOMAIN (PHOBIUS); CYTOPLASMIC_DOMAIN (PHOBIUS); TMhelix (TMHMM); TMhelix (TMHMM)                                                                                                                                                                                                                                                                                                                                                                                                                                                                                                                                |
| 2060 | c40689_g1_i1_len_3510_path_151_0_91_783_2_92_148_150_149_3509_1                                        | 3248 | heat shock 70 kda protein cognate 4                     | 1170 | 0        | 93.90% | 0.155 | Coil (COILS); IPR013126 (PRINTS); IPR013126 (PFAM); G3DSA:3.30.420.40 (GENE3D); G3DSA:3.30.30.30 (GENE3D); G3DSA:3.90.640.10 (GENE3D); IPR029048 (G3DSA:1.20.1270.GENE3D); IPR029047 (G3DSA:2.60.34.GENE3D); G3DSA:3.30.420.40 (GENE3D); PTHR19375:SF142 (PANTHER); PTHR19375 (PANTHER); IPR018181 (PROSITE_PATTERNS); IPR018181 (PROSITE_PATTERNS); IPR018181 (PROSITE_PATTERNS); TRANSMEMBRANE (PHOBIUS); CYTOPLASMIC_DOMAIN (PHOBIUS); TRANSMEMBRANE (PHOBIUS); TRANSMEMBRANE (PHOBIUS); TRANSMEMBRANE (PHOBIUS); NON_CYTOPLASMIC_DOMAIN (PHOBIUS); CYTOPLASMIC_DOMAIN (PHOBIUS); NON_CYTOPLASMIC_DOMAIN (PHOBIUS); TRANSMEMBRANE (PHOBIUS); TRANSMEMBRANE (PHOBIUS); TRANSMEMBRANE (PHOBIUS); NON_CYTOPLASMIC_DOMAIN (PHOBIUS); CYTOPLASMIC_DOMAIN (PHOBIUS); SSF53067 (SUPERFAMILY); IPR029048 (SUPERFAMILY); SSF53067 (SUPERFAMILY); IPR029047 (SUPERFAMILY); TMhelix (TMHMM); TMhelix (TMHMM); TMhelix (TMHMM) |

[illegible]



|      |                                                                                                         |      |                                                      |      |           |        |       |                                                                                                                                                                                                                                                                                                                                                                                                                                                                                                                                                                                                                                                                                                                                                                                                                                                                                                                                 |
|------|---------------------------------------------------------------------------------------------------------|------|------------------------------------------------------|------|-----------|--------|-------|---------------------------------------------------------------------------------------------------------------------------------------------------------------------------------------------------------------------------------------------------------------------------------------------------------------------------------------------------------------------------------------------------------------------------------------------------------------------------------------------------------------------------------------------------------------------------------------------------------------------------------------------------------------------------------------------------------------------------------------------------------------------------------------------------------------------------------------------------------------------------------------------------------------------------------|
| 2065 | c40722_g1_i1_len_1521_path_1441_0_217_1_659_218_219_1661_220_314_7006_315_326_7018_327_361_1800_362_2   | 3116 | techylectin-5b isoform                               | 507  | 1.20E-61  | 64.90% | 0.103 | IPR002181 (SMART); IPR014716 (G3DSA:3.90.215.GENE3D); IPR014715 (G3DSA:4.10.530.GENE3D); IPR002181 (PFAM); PTHR19143 (PANTHER); IPR020837 (PROSITE_PATTERNS); NON_CYTOPLASMIC_DOMAIN (PHOBIUS); TRANSMEMBRANE (PHOBIUS); CYTOPLASMIC_DOMAIN (PHOBIUS); IPR002181 (PROSITE_PROFILES); IPR002181 (SUPERFAMILY); TMhelix (TMHMM)                                                                                                                                                                                                                                                                                                                                                                                                                                                                                                                                                                                                   |
| 2066 | c40722_g1_i2_len_1777_path_159_0_458_61_8_459_486_6658_487_501_1951_502_569_9_3_570_576_100_577_631_2_1 | 2643 | tl5a_tactr ame: full=techylectin-5a flags: precursor | 592  | 1.50E-61  | 64.90% | 0.187 | Coil (COILS); IPR002181 (SMART); IPR002181 (PFAM); IPR014716 (G3DSA:3.90.215.GENE3D); IPR014715 (G3DSA:4.10.530.GENE3D); PTHR19143 (PANTHER); IPR020837 (PROSITE_PATTERNS); TRANSMEMBRANE (PHOBIUS); CYTOPLASMIC_DOMAIN (PHOBIUS); NON_CYTOPLASMIC_DOMAIN (PHOBIUS); TRANSMEMBRANE (PHOBIUS); NON_CYTOPLASMIC_DOMAIN (PHOBIUS); TRANSMEMBRANE (PHOBIUS); CYTOPLASMIC_DOMAIN (PHOBIUS); IPR002181 (PROSITE_PROFILES); IPR002181 (SUPERFAMILY); TMhelix (TMHMM); TMhelix (TMHMM); TMhelix (TMHMM)                                                                                                                                                                                                                                                                                                                                                                                                                                 |
| 2067 | c40722_g1_i3_len_1793_path_1441_0_217_6_745_218_219_1661_220_314_6877_315_326_7018_327_361_1431_362_2   | 2359 | techylectin-5b isoform                               | 597  | 1.92E-60  | 64.30% | 0.11  | Coil (COILS); IPR002181 (SMART); IPR014715 (G3DSA:4.10.530.GENE3D); IPR014716 (G3DSA:3.90.215.GENE3D); IPR002181 (PFAM); PTHR19143 (PANTHER); IPR020837 (PROSITE_PATTERNS); TRANSMEMBRANE (PHOBIUS); CYTOPLASMIC_DOMAIN (PHOBIUS); NON_CYTOPLASMIC_DOMAIN (PHOBIUS); TRANSMEMBRANE (PHOBIUS); NON_CYTOPLASMIC_DOMAIN (PHOBIUS); TRANSMEMBRANE (PHOBIUS); CYTOPLASMIC_DOMAIN (PHOBIUS); IPR002181 (PROSITE_PROFILES); IPR002181 (SUPERFAMILY); TMhelix (TMHMM); TMhelix (TMHMM)                                                                                                                                                                                                                                                                                                                                                                                                                                                  |
| 2068 | c40730_g1_i2_len_4337_path_3438_0_2277_5716_2278_2295_5734_2296_2344_5783_23_45_2354_5793_2355_2505_3   | 1704 | agap005608-pa-like protein                           | 1446 | 1.49E-138 | 75.30% | 0.13  | Coil (COILS); Coil (COILS); IPR011992 (G3DSA:1.10.238.GENE3D); IPR011992 (PFAM); PTHR19237:SF20 (PANTHER); PTHR19237 (PANTHER); IPR018247 (PROSITE_PATTERNS); TRANSMEMBRANE (PHOBIUS); CYTOPLASMIC_DOMAIN (PHOBIUS); TRANSMEMBRANE (PHOBIUS); NON_CYTOPLASMIC_DOMAIN (PHOBIUS); CYTOPLASMIC_DOMAIN (PHOBIUS); TRANSMEMBRANE (PHOBIUS); TRANSMEMBRANE (PHOBIUS); TRANSMEMBRANE (PHOBIUS); CYTOPLASMIC_DOMAIN (PHOBIUS); TRANSMEMBRANE (PHOBIUS); CYTOPLASMIC_DOMAIN (PHOBIUS); TRANSMEMBRANE (PHOBIUS); NON_CYTOPLASMIC_DOMAIN (PHOBIUS); NON_CYTOPLASMIC_DOMAIN (PHOBIUS); TRANSMEMBRANE (PHOBIUS); CYTOPLASMIC_DOMAIN (PHOBIUS); TRANSMEMBRANE (PHOBIUS); NON_CYTOPLASMIC_DOMAIN (PHOBIUS); NON_CYTOPLASMIC_DOMAIN (PHOBIUS); TRANSMEMBRANE (PHOBIUS); IPR002048 (PROSITE_PROFILES); IPR002048 (PROSITE_PROFILES); SSF47473 (SUPERFAMILY); TMhelix (TMHMM); TMhelix (TMHMM); TMhelix (TMHMM); TMhelix (TMHMM); TMhelix (TMHMM) |
| 2069 | c40730_g1_i3_len_1330_path_6923_0_98_10_524_99_100_7599_101_1329_3                                      | 473  | ef-hand protein nucb1                                | 444  | 5.85E-150 | 74.20% | 0.13  | Coil (COILS); Coil (COILS); IPR011992 (G3DSA:1.10.238.GENE3D); IPR011992 (PFAM); PTHR19237 (PANTHER); PTHR19237:SF20 (PANTHER); IPR018247 (PROSITE_PATTERNS); CYTOPLASMIC_DOMAIN (PHOBIUS); TRANSMEMBRANE (PHOBIUS); NON_CYTOPLASMIC_DOMAIN (PHOBIUS); IPR002048 (PROSITE_PROFILES); IPR002048 (PROSITE_PROFILES); SSF47473 (SUPERFAMILY)                                                                                                                                                                                                                                                                                                                                                                                                                                                                                                                                                                                       |
| 2070 | c40753_g1_i9_len_7459_path_17798_0_2366_13395_2367_3151_21078_3152_4019_156_21_4020_4020_21946_40_3     | 5415 | protein disulfide-isomerase                          | 2487 | 0         | 77.10% | 0.127 | Coil (COILS); Coil (COILS); Coil (COILS); Coil (COILS); IPR010893 (PFAM); IPR012336 (G3DSA:3.40.30.GENE3D); IPR013766 (PFAM); PTHR19991 (PANTHER); CYTOPLASMIC_DOMAIN (PHOBIUS); NON_CYTOPLASMIC_DOMAIN (PHOBIUS); TRANSMEMBRANE (PHOBIUS); TRANSMEMBRANE (PHOBIUS); CYTOPLASMIC_DOMAIN (PHOBIUS); NON_CYTOPLASMIC_DOMAIN (PHOBIUS); CYTOPLASMIC_DOMAIN (PHOBIUS); TRANSMEMBRANE (PHOBIUS); TRANSMEMBRANE (PHOBIUS); IPR012336 (PROSITE_PROFILES); IPR012336 (PROSITE_PROFILES); IPR012336 (SUPERFAMILY); TMhelix (TMHMM); TMhelix (TMHMM); TMhelix (TMHMM)       |

|      |                                                                                                      |      |                                         |      |           |        |         |                                                                                                                                                                                                                                                                                                                                                                                                                                                                                                                                                                        |
|------|------------------------------------------------------------------------------------------------------|------|-----------------------------------------|------|-----------|--------|---------|------------------------------------------------------------------------------------------------------------------------------------------------------------------------------------------------------------------------------------------------------------------------------------------------------------------------------------------------------------------------------------------------------------------------------------------------------------------------------------------------------------------------------------------------------------------------|
| 2071 | c40772_g2_i1_len_2111_path_6657_0_48_63_38_49_50_4194_51_89_6744_90_2110_5                           | 767  | cytochrome p450                         | 703  | 0         | 69.50% | 0.134   | Coil (COILS); IPR002401 (PRINTS); IPR001128 (PRINTS); IPR001128 (G3DSA:1.10.630.GENE3D); IPR001128 (PFAM); PTHR24290 (PANTHER); PTHR24290:SF0 (PANTHER); IPR017972 (PROSITE_PATTERNS); CYTOPLASMIC_DOMAIN (PHOBIUS); NON_CYTOPLASMIC_DOMAIN (PHOBIUS); TRANSMEMBRANE (PHOBIUS); CYTOPLASMIC_DOMAIN (PHOBIUS); TRANSMEMBRANE (PHOBIUS); IPR001128 (SUPERFAMILY); TMhelix (TMHMM)                                                                                                                                                                                        |
| 2072 | c40783_g1_i1_len_3133_path_635_0_148_78_3_149_154_399_155_759_7127_760_967_1_604_968_1358_1994_2     | 5149 | group 3 secretory phospholipase partial | 1044 | 2.19E-76  | 54.80% | 0.14    | Coil (COILS); IPR016090 (G3DSA:1.20.90.GENE3D); IPR001211 (PFAM); PTHR12253 (PANTHER); TRANSMEMBRANE (PHOBIUS); CYTOPLASMIC_DOMAIN (PHOBIUS); TRANSMEMBRANE (PHOBIUS); NON_CYTOPLASMIC_DOMAIN (PHOBIUS); NON_CYTOPLASMIC_DOMAIN (PHOBIUS); IPR016090 (SUPERFAMILY)                                                                                                                                                                                                                                                                                                     |
| 2073 | c40783_g1_i2_len_3136_path_635_0_148_78_3_149_154_399_155_759_1393_760_970_1_604_971_1361_1994_2     | 5734 | group 3 secretory phospholipase partial | 1045 | 1.17E-82  | 56.30% | 0.14    | Coil (COILS); IPR016090 (G3DSA:1.20.90.GENE3D); IPR001211 (PFAM); PTHR12253 (PANTHER); NON_CYTOPLASMIC_DOMAIN (PHOBIUS); NON_CYTOPLASMIC_DOMAIN (PHOBIUS); TRANSMEMBRANE (PHOBIUS); CYTOPLASMIC_DOMAIN (PHOBIUS); TRANSMEMBRANE (PHOBIUS); IPR016090 (SUPERFAMILY)                                                                                                                                                                                                                                                                                                     |
| 2074 | c40789_g1_i1_len_2516_path_2789_0_514_5_533_515_556_3304_557_1548_4294_1549_1553_4299_1554_1718_4_2  | 1698 | prophenoloxidase activating factor      | 838  | 7.35E-125 | 67.70% | 0.211   | IPR001314 (PRINTS); IPR001254 (SMART); IPR001254 (PFAM); G3DSA:2.40.10.10 (GENE3D); G3DSA:2.40.10.10 (GENE3D); PTHR24268:SF95 (PANTHER); PTHR24268 (PANTHER); IPR018114 (PROSITE_PATTERNS); CYTOPLASMIC_DOMAIN (PHOBIUS); NON_CYTOPLASMIC_DOMAIN (PHOBIUS); TRANSMEMBRANE (PHOBIUS); TRANSMEMBRANE (PHOBIUS); NON_CYTOPLASMIC_DOMAIN (PHOBIUS); CYTOPLASMIC_DOMAIN (PHOBIUS); TRANSMEMBRANE (PHOBIUS); TRANSMEMBRANE (PHOBIUS); CYTOPLASMIC_DOMAIN (PHOBIUS); IPR001254 (PROSITE_PROFILES); IPR009003 (SUPERFAMILY); TMhelix (TMHMM); TMhelix (TMHMM); TMhelix (TMHMM) |
| 2075 | c40789_g1_i2_len_2474_path_2789_0_514_3_304_515_1506_4294_1507_1511_4299_151_2_1676_4459_1677_1677_2 | 1759 | prophenoloxidase activating factor      | 824  | 4.83E-125 | 67.70% | 0.211   | IPR001314 (PRINTS); IPR001254 (SMART); IPR001254 (PFAM); G3DSA:2.40.10.10 (GENE3D); G3DSA:2.40.10.10 (GENE3D); PTHR24268 (PANTHER); PTHR24268:SF95 (PANTHER); IPR018114 (PROSITE_PATTERNS); TRANSMEMBRANE (PHOBIUS); TRANSMEMBRANE (PHOBIUS); NON_CYTOPLASMIC_DOMAIN (PHOBIUS); TRANSMEMBRANE (PHOBIUS); NON_CYTOPLASMIC_DOMAIN (PHOBIUS); CYTOPLASMIC_DOMAIN (PHOBIUS); CYTOPLASMIC_DOMAIN (PHOBIUS); TRANSMEMBRANE (PHOBIUS); CYTOPLASMIC_DOMAIN (PHOBIUS); IPR001254 (PROSITE_PROFILES); IPR009003 (SUPERFAMILY); TMhelix (TMHMM); TMhelix (TMHMM); TMhelix (TMHMM) |
| 2076 | c40794_g1_i1_len_3446_path_1_0_162_164_163_2665_2667_2666_2666_2668_2667_34_45_1                     | 1176 | chorion peroxidase-like                 | 1149 | 0         | 61.20% | 0.175   | IPR019791 (PRINTS); IPR019791 (G3DSA:1.10.640.GENE3D); IPR019791 (PFAM); PTHR11475 (PANTHER); TRANSMEMBRANE (PHOBIUS); NON_CYTOPLASMIC_DOMAIN (PHOBIUS); CYTOPLASMIC_DOMAIN (PHOBIUS); IPR019791 (PROSITE_PROFILES); IPR010255 (SUPERFAMILY)                                                                                                                                                                                                                                                                                                                           |
| 2077 | c40794_g1_i2_len_3330_path_6991_0_46_16_4_47_2549_2667_2550_2550_2668_2551_3_329_2                   | 1138 | chorion peroxidase-like                 | 1110 | 0         | 61.20% | 0.366 Y | IPR019791 (PRINTS); IPR019791 (G3DSA:1.10.640.GENE3D); IPR019791 (PFAM); PTHR11475 (PANTHER); NON_CYTOPLASMIC_DOMAIN (PHOBIUS); SIGNAL_PEPTIDE (PHOBIUS); TRANSMEMBRANE (PHOBIUS); SIGNAL_PEPTIDE_H_REGION (PHOBIUS); CYTOPLASMIC_DOMAIN (PHOBIUS); SIGNAL_PEPTIDE_N_REGION (PHOBIUS); SIGNAL_PEPTIDE_C_REGION (PHOBIUS); IPR019791 (PROSITE_PROFILES); IPR010255 (SUPERFAMILY)                                                                                                                                                                                        |
| 2078 | c40817_g3_i1_len_383_path_395_0_297_693_298_382_1                                                    | 29   | cda2 isoform a                          | 128  | 4.00E-60  | 85.30% | 0.196   | IPR002172 (SMART); IPR002557 (PFAM); IPR002557 (G3DSA:2.170.140.GENE3D); IPR002172 (G3DSA:4.10.400.GENE3D); IPR002172 (PFAM); PTHR11177:SF106 (PANTHER); PTHR11177 (PANTHER); IPR023415 (PROSITE_PATTERNS); IPR002172 (PROSITE_PROFILES); IPR002557 (PROSITE_PROFILES); IPR002172 (SUPERFAMILY); IPR002557 (SUPERFAMILY)                                                                                                                                                                                                                                               |
| 2079 | c40821_g1_i1_len_1790_path_28_0_1_779_2_10_7674_11_31_944_32_61_974_62_1288_6736_1289_1295_6743_3    | 4056 | meprin a                                | 597  | 8.81E-78  | 53.70% | 0.630 Y | IPR001506 (PRINTS); IPR000859 (SMART); IPR006026 (SMART); IPR001506 (PFAM); IPR000859 (G3DSA:2.60.120.GENE3D); IPR024079 (G3DSA:3.40.390.GENE3D); IPR000859 (PFAM); PTHR10127 (PANTHER); PTHR10127:SF580 (PANTHER); SIGNAL_PEPTIDE_H_REGION (PHOBIUS); SIGNAL_PEPTIDE (PHOBIUS); NON_CYTOPLASMIC_DOMAIN (PHOBIUS); SIGNAL_PEPTIDE_C_REGION (PHOBIUS); SIGNAL_PEPTIDE_N_REGION (PHOBIUS); IPR000859 (PROSITE_PROFILES); SignalP-noTM (SIGNALP_EUK); IPR000859 (SUPERFAMILY); SSF55486 (SUPERFAMILY)                                                                     |

|      |                                                                                                        |      |                                                                                                             |      |          |        |       |   |                                                                                                                                                                                                                                                                                                                                                                                                                                                                                                                                                                                                                                                                                                                                                              |
|------|--------------------------------------------------------------------------------------------------------|------|-------------------------------------------------------------------------------------------------------------|------|----------|--------|-------|---|--------------------------------------------------------------------------------------------------------------------------------------------------------------------------------------------------------------------------------------------------------------------------------------------------------------------------------------------------------------------------------------------------------------------------------------------------------------------------------------------------------------------------------------------------------------------------------------------------------------------------------------------------------------------------------------------------------------------------------------------------------------|
| 2080 | c40821_g1_i2_len_1829_path_28_0_1_779_2_10_7674_11_31_974_32_1258_6736_1259_1265_6743_1266_16_3        | 4281 | meprin a                                                                                                    | 610  | 9.38E-78 | 53.90% | 0.638 | Y | IPR001506 (PRINTS); IPR006026 (SMART); IPR000859 (SMART); IPR000859 (PFAM); IPR024079 (G3DSA:3.40.390.GENE3D); IPR001506 (PFAM); IPR000859 (G3DSA:2.60.120.GENE3D); PTHR10127 (PANTHER); PTHR10127:SF580 (PANTHER); SIGNAL_PEPTIDE_H_REGION (PHOBIUS); NON_CYTOPLASMIC_DOMAIN (PHOBIUS); SIGNAL_PEPTIDE_C_REGION (PHOBIUS); SIGNAL_PEPTIDE_N_REGION (PHOBIUS); SIGNAL_PEPTIDE (PHOBIUS); IPR000859 (PROSITE_PROFILES); SignalP-noTM (SIGNALP_EUK); IPR000859 (SUPERFAMILY); SSF55486 (SUPERFAMILY)                                                                                                                                                                                                                                                           |
| 2081 | c40821_g1_i3_len_1859_path_28_0_1_779_2_10_7674_11_31_944_32_61_974_62_1288_6736_1289_1295_6743_3      | 4370 | meprin a                                                                                                    | 620  | 2.02E-77 | 53.70% | 0.638 | Y | IPR001506 (PRINTS); IPR000859 (SMART); IPR006026 (SMART); IPR000859 (PFAM); IPR001506 (PFAM); IPR024079 (G3DSA:3.40.390.GENE3D); IPR000859 (G3DSA:2.60.120.GENE3D); PTHR10127:SF580 (PANTHER); PTHR10127 (PANTHER); NON_CYTOPLASMIC_DOMAIN (PHOBIUS); SIGNAL_PEPTIDE_C_REGION (PHOBIUS); SIGNAL_PEPTIDE (PHOBIUS); SIGNAL_PEPTIDE_N_REGION (PHOBIUS); SIGNAL_PEPTIDE_H_REGION (PHOBIUS); IPR000859 (PROSITE_PROFILES); SignalP-noTM (SIGNALP_EUK); IPR000859 (SUPERFAMILY); SSF55486 (SUPERFAMILY)                                                                                                                                                                                                                                                           |
| 2082 | c40821_g2_i1_len_1333_path_7523_0_0_752_4_1_23_4243_24_43_631_44_45_633_46_96_684_97_101_4268_102_12_0 | 4621 | ---NA---                                                                                                    | 445  |          |        | 0.112 |   | no IPS match                                                                                                                                                                                                                                                                                                                                                                                                                                                                                                                                                                                                                                                                                                                                                 |
| 2083 | c40821_g2_i2_len_1281_path_177_0_22_200_23_42_631_43_44_684_45_49_4268_50_12_33_5445_1234_1280_2       | 4589 | ---NA---                                                                                                    | 427  |          |        | 0.129 |   | no IPS match                                                                                                                                                                                                                                                                                                                                                                                                                                                                                                                                                                                                                                                                                                                                                 |
| 2084 | c40822_g1_i1_len_1956_path_1127_0_176_1_304_177_272_1400_273_347_1475_348_441_1569_442_482_1610_483_1  | 1165 | heat shock protein 70                                                                                       | 652  | 0        | 90.30% | 0.102 |   | Coil (COILS); IPR013126 (PRINTS); G3DSA:3.30.30.30 (GENE3D); G3DSA:3.30.420.40 (GENE3D); G3DSA:3.90.640.10 (GENE3D); IPR029048 (G3DSA:1.20.1270.GENE3D); G3DSA:3.30.420.40 (GENE3D); IPR029047 (G3DSA:2.60.34.GENE3D); IPR013126 (PFAM); PTHR19375:SF142 (PANTHER); PTHR19375 (PANTHER); IPR018181 (PROSITE_PATTERNS); SSF53067 (SUPERFAMILY); SSF53067 (SUPERFAMILY); IPR029047 (SUPERFAMILY); IPR029048 (SUPERFAMILY)                                                                                                                                                                                                                                                                                                                                      |
| 2085 | c40822_g2_i1_len_363_path_497_0_362_3                                                                  | 70   | heat shock cognate 71 kda protein                                                                           | 121  | 2.07E-23 | 93.80% | 0.179 |   | IPR013126 (PRINTS); IPR013126 (PFAM); G3DSA:3.30.420.40 (GENE3D); PTHR19375:SF155 (PANTHER); PTHR19375 (PANTHER); IPR018181 (PROSITE_PATTERNS); SSF53067 (SUPERFAMILY)                                                                                                                                                                                                                                                                                                                                                                                                                                                                                                                                                                                       |
| 2086 | c40825_g1_i1_len_3004_path_6912_0_74_64_6_75_2143_2714_2144_2150_104_2151_2_843_26_2844_2859_34_0      | 1075 | villin-1-like isoform x1                                                                                    | 1002 | 0        | 66.30% | 0.168 |   | IPR007122 (PRINTS); IPR007122 (SMART); IPR003128 (SMART); IPR029006 (G3DSA:3.40.20.GENE3D); IPR029006 (G3DSA:3.40.20.GENE3D); IPR007123 (PFAM); IPR029006 (G3DSA:3.40.20.GENE3D); IPR003128 (PFAM); IPR003128 (G3DSA:1.10.950.GENE3D); IPR007122 (PANTHER); TRANSMEMBRANE (PHOBIUS); NON_CYTOPLASMIC_DOMAIN (PHOBIUS); CYTOPLASMIC_DOMAIN (PHOBIUS); IPR003128 (PROSITE_PROFILES); SSF55753 (SUPERFAMILY); SSF55753 (SUPERFAMILY); SSF55753 (SUPERFAMILY); SSF55753 (SUPERFAMILY); SSF55753 (SUPERFAMILY); IPR003128 (SUPERFAMILY); TMhelix (TMHMM)                                                                                                                                                                                                          |
| 2087 | c40825_g1_i2_len_3082_path_493_0_152_64_6_153_2221_2714_2222_2228_104_2229_2921_26_2922_2937_3_0       | 1095 | villin-1-like isoform x1                                                                                    | 1028 | 0        | 66.30% | 0.209 |   | IPR007122 (PRINTS); IPR007122 (SMART); IPR003128 (SMART); IPR029006 (G3DSA:3.40.20.GENE3D); IPR007123 (PFAM); IPR029006 (G3DSA:3.40.20.GENE3D); IPR003128 (G3DSA:1.10.950.GENE3D); IPR003128 (PFAM); IPR029006 (G3DSA:3.40.20.GENE3D); IPR007122 (PANTHER); TRANSMEMBRANE (PHOBIUS); NON_CYTOPLASMIC_DOMAIN (PHOBIUS); CYTOPLASMIC_DOMAIN (PHOBIUS); IPR003128 (PROSITE_PROFILES); SSF55753 (SUPERFAMILY); SSF55753 (SUPERFAMILY); SSF55753 (SUPERFAMILY); SSF55753 (SUPERFAMILY); SSF55753 (SUPERFAMILY); IPR003128 (SUPERFAMILY); TMhelix (TMHMM)                                                                                                                                                                                                          |
| 2088 | c40827_g1_i1_len_3258_path_7645_0_157_3_12_158_2183_2338_2184_2200_2355_2201_2827_2982_2828_2833_1     | 585  | a chain structural studies of protein tyrosine phosphatase beta catalytic domain in complex with inhibitors | 1086 | 1.07E-75 | 57.90% | 0.105 |   | IPR000242 (PRINTS); IPR003961 (SMART); IPR003595 (SMART); IPR000242 (SMART); IPR013783 (G3DSA:2.60.40.GENE3D); IPR029021 (G3DSA:3.90.190.GENE3D); IPR000242 (PFAM); IPR013783 (G3DSA:2.60.40.GENE3D); IPR013783 (G3DSA:2.60.40.GENE3D); IPR003961 (PFAM); IPR013783 (G3DSA:2.60.40.GENE3D); PTHR19134 (PANTHER); IPR016130 (PROSITE_PATTERNS); CYTOPLASMIC_DOMAIN (PHOBIUS); NON_CYTOPLASMIC_DOMAIN (PHOBIUS); TRANSMEMBRANE (PHOBIUS); IPR003961 (PROSITE_PROFILES); IPR003961 (PROSITE_PROFILES); IPR003961 (PROSITE_PROFILES); IPR000242 (PROSITE_PROFILES); IPR000387 (PROSITE_PROFILES); IPR003961 (PROSITE_PROFILES); IPR003961 (PROSITE_PROFILES); IPR003961 (SUPERFAMILY); IPR029021 (SUPERFAMILY); IPR003961 (SUPERFAMILY); IPR003961 (SUPERFAMILY) |

|      |                                                                                                               |      |                                 |      |          |        |        |                                                                                                                                                                                                                                                                                                                                                                                                                                                                                                                                                                                                                                                                                                                                                                                                                                                                                                                                                                                                                                                                                                                                                                                 |
|------|---------------------------------------------------------------------------------------------------------------|------|---------------------------------|------|----------|--------|--------|---------------------------------------------------------------------------------------------------------------------------------------------------------------------------------------------------------------------------------------------------------------------------------------------------------------------------------------------------------------------------------------------------------------------------------------------------------------------------------------------------------------------------------------------------------------------------------------------------------------------------------------------------------------------------------------------------------------------------------------------------------------------------------------------------------------------------------------------------------------------------------------------------------------------------------------------------------------------------------------------------------------------------------------------------------------------------------------------------------------------------------------------------------------------------------|
| 2089 | c40831_g2_i1_len_3132_path_3669_0_661_4<br>76_662_697_4364_698_713_4380_714_787_<br>4453_788_1292_4958_1293_1 | 1173 | microneme protein partial       | 1035 | 4.83E-28 | 38.40% | 0.450Y | IPR000742 (SMART); IPR001881 (SMART); G3DSA:2.10.25.10 (GENE3D); G3DSA:2.10.25.10 (GENE3D); IPR001881 (PFAM); G3DSA:2.10.25.10 (GENE3D); G3DSA:2.10.25.10 (GENE3D); G3DSA:2.10.25.10 (GENE3D); IPR024731 (PFAM); G3DSA:2.10.25.10 (GENE3D); PTHR24034 (PANTHER); PTHR24034:SF36 (PANTHER); IPR013032 (PROSITE_PATTERNS); IPR000152 (PROSITE_PATTERNS); IPR000152 (PROSITE_PATTERNS); IPR013032 (PROSITE_PATTERNS); IPR013032 (PROSITE_PATTERNS); IPR013032 (PROSITE_PATTERNS); IPR013032 (PROSITE_PATTERNS); IPR013032 (PROSITE_PATTERNS); IPR000152 (PROSITE_PATTERNS); IPR000152 (PROSITE_PATTERNS); IPR013032 (PROSITE_PATTERNS); IPR013032 (PROSITE_PATTERNS); CYTOPLASMIC_DOMAIN (PHOBIUS); NON_CYTOPLASMIC_DOMAIN (PHOBIUS); TRANSMEMBRANE (PHOBIUS); PD968187 (PRODOM); IPR000742 (PROSITE_PROFILES); SSF57196 (SUPERFAMILY); IPR009030 (SUPERFAMILY); IPR009030 (SUPERFAMILY); TMhelix (TMHMM)                                                        |
| 2090 | c40834_g1_i1_len_333_path_2486_0_65_366<br>6_66_186_2667_187_196_4566_197_224_38<br>9_225_289_454_290_332_1   | 5    | cytolysin src-1-like isoform x2 | 111  | 1.64E-17 | 56.60% | 0.201  | IPR015926 (G3DSA:2.60.270.GENE3D); IPR015926 (SUPERFAMILY)                                                                                                                                                                                                                                                                                                                                                                                                                                                                                                                                                                                                                                                                                                                                                                                                                                                                                                                                                                                                                                                                                                                      |
| 2091 | c40834_g2_i1_len_1079_path_2297_0_72_23<br>70_73_75_2373_76_158_2456_159_160_245<br>8_161_188_4427_189_333_1  | 96   | cytolysin src-1-like isoform x2 | 360  | 4.89E-25 | 51.30% | 0.11   | IPR009104 (PFAM); IPR015926 (G3DSA:2.60.270.GENE3D); TRANSMEMBRANE (PHOBIUS); NON_CYTOPLASMIC_DOMAIN (PHOBIUS); CYTOPLASMIC_DOMAIN (PHOBIUS); IPR015926 (SUPERFAMILY); TMhelix (TMHMM)                                                                                                                                                                                                                                                                                                                                                                                                                                                                                                                                                                                                                                                                                                                                                                                                                                                                                                                                                                                          |
| 2092 | c40834_g2_i2_len_672_path_3229_0_149_24<br>56_150_151_2458_152_179_2486_180_245_<br>2552_246_300_1417_301_3_1 | 71   | cytolysin src-1-like isoform x2 | 224  | 1.31E-23 | 52.80% | 0.101  | IPR015926 (G3DSA:2.60.270.GENE3D); IPR015926 (SUPERFAMILY)                                                                                                                                                                                                                                                                                                                                                                                                                                                                                                                                                                                                                                                                                                                                                                                                                                                                                                                                                                                                                                                                                                                      |
| 2093 | c40838_g1_i1_len_3240_path_12569_0_49_2<br>36_50_81_268_82_135_322_136_137_324_1<br>38_162_12849_163_179_36_2 | 1002 | nidogen-2 isoform x1            | 1080 | 0        | 61.90% | 0.135  | IPR002223 (PRINTS); IPR000033 (SMART); IPR000742 (SMART); IPR002223 (SMART); IPR011042 (G3DSA:2.120.10.GENE3D); IPR024731 (PFAM); IPR000033 (PFAM); IPR002223 (G3DSA:4.10.410.GENE3D); IPR002223 (PFAM); G3DSA:2.10.25.10 (GENE3D); IPR023413 (G3DSA:2.40.155.GENE3D); PTHR10529 (PANTHER); IPR013032 (PROSITE_PATTERNS); IPR020901 (PROSITE_PATTERNS); IPR013032 (PROSITE_PATTERNS); TRANSMEMBRANE (PHOBIUS); NON_CYTOPLASMIC_DOMAIN (PHOBIUS); CYTOPLASMIC_DOMAIN (PHOBIUS); IPR000742 (PROSITE_PROFILES); IPR000033 (PROSITE_PROFILES); IPR000742 (PROSITE_PROFILES); IPR000742 (PROSITE_PROFILES); IPR000742 (PROSITE_PROFILES); IPR000742 (PROSITE_PROFILES); IPR000742 (PROSITE_PROFILES); IPR000033 (PROSITE_PROFILES); IPR000033 (PROSITE_PROFILES); IPR000033 (PROSITE_PROFILES); IPR000033 (PROSITE_PROFILES); IPR000742 (PROSITE_PROFILES); IPR002223 (SUPERFAMILY); IPR009030 (SUPERFAMILY); SSF63825 (SUPERFAMILY) |

|      |                                                                                                               |       |                                                                                                               |      |           |        |       |                                                                                                                                                                                                                                                                                                                                                                                                                                                                                                                                                                                                                                                                                                                                                                                                                                                                                                                                                                                                                                                                                                                                                                                                         |
|------|---------------------------------------------------------------------------------------------------------------|-------|---------------------------------------------------------------------------------------------------------------|------|-----------|--------|-------|---------------------------------------------------------------------------------------------------------------------------------------------------------------------------------------------------------------------------------------------------------------------------------------------------------------------------------------------------------------------------------------------------------------------------------------------------------------------------------------------------------------------------------------------------------------------------------------------------------------------------------------------------------------------------------------------------------------------------------------------------------------------------------------------------------------------------------------------------------------------------------------------------------------------------------------------------------------------------------------------------------------------------------------------------------------------------------------------------------------------------------------------------------------------------------------------------------|
| 2094 | c40838_g1_i2_len_3230_path_25_0_46_72_4<br>7_86_112_87_101_127_102_137_163_138_2<br>10_236_211_242_268_243_1  | 1016  | nidogen-2 isoform x1                                                                                          | 1077 | 0         | 61.20% | 0.1   | IPR002223 (PRINTS); IPR000742 (SMART); IPR002223 (SMART); IPR000033 (SMART); IPR002223 (PFAM); IPR002223 (G3DSA:4.10.410.GENE3D); IPR024731 (PFAM); G3DSA:2.10.25.10 (GENE3D); IPR000033 (PFAM); IPR023413 (G3DSA:2.40.155.GENE3D); IPR011042 (G3DSA:2.120.10.GENE3D); PTHR10529 (PANTHER); IPR013032 (PROSITE_PATTERNS); IPR020901 (PROSITE_PATTERNS); IPR013032 (PROSITE_PATTERNS); TRANSMEMBRANE (PHOBIUS); NON_CYTOPLASMIC_DOMAIN (PHOBIUS); CYTOPLASMIC_DOMAIN (PHOBIUS); IPR000742 (PROSITE_PROFILES); IPR000033 (PROSITE_PROFILES); IPR000742 (PROSITE_PROFILES); SSF63825 (SUPERFAMILY); SSF57196 (SUPERFAMILY); IPR009030 (SUPERFAMILY); IPR002223 (SUPERFAMILY) |
| 2095 | c40838_g1_i3_len_2827_path_12690_0_20_7<br>56_21_886_1622_887_909_1645_910_237<br>0_3106_2371_2373_31_1       | 997   | nidogen- partial                                                                                              | 942  | 0         | 65.80% | 0.111 | IPR000742 (SMART); IPR000033 (SMART); IPR000033 (PFAM); IPR011042 (G3DSA:2.120.10.GENE3D); IPR024731 (PFAM); IPR023413 (G3DSA:2.40.155.GENE3D); G3DSA:2.10.25.10 (GENE3D); PTHR10529 (PANTHER); IPR013032 (PROSITE_PATTERNS); IPR013032 (PROSITE_PATTERNS); IPR013032 (PROSITE_PATTERNS); IPR013032 (PROSITE_PATTERNS); IPR013032 (PROSITE_PATTERNS); NON_CYTOPLASMIC_DOMAIN (PHOBIUS); TRANSMEMBRANE (PHOBIUS); CYTOPLASMIC_DOMAIN (PHOBIUS); IPR000033 (PROSITE_PROFILES); IPR000742 (PROSITE_PROFILES); IPR000742 (PROSITE_PROFILES); IPR000033 (PROSITE_PROFILES); IPR000742 (PROSITE_PROFILES); IPR000033 (PROSITE_PROFILES); IPR000742 (PROSITE_PROFILES); IPR000033 (PROSITE_PROFILES); IPR000742 (PROSITE_PROFILES); IPR000033 (PROSITE_PROFILES); SSF63825 (SUPERFAMILY)                                                                                                                                                                                                                                                                                                                                                                                                                       |
| 2096 | c40840_g1_i1_len_3911_path_4393_0_1317_<br>5703_1318_1340_516_1341_2204_6586_22<br>05_2211_6593_2212_5        | 1416  | neutral and basic amino acid transport protein rbat                                                           | 1303 | 2.09E-160 | 56.50% | 0.182 | IPR006589 (SMART); IPR013780 (G3DSA:2.60.40.GENE3D); IPR006047 (PFAM); G3DSA:3.90.400.10 (GENE3D); IPR013781 (G3DSA:3.20.20.GENE3D); PTHR10357:SF77 (PANTHER); IPR015902 (PANTHER); TRANSMEMBRANE (PHOBIUS); CYTOPLASMIC_DOMAIN (PHOBIUS); TRANSMEMBRANE (PHOBIUS); CYTOPLASMIC_DOMAIN (PHOBIUS); CYTOPLASMIC_DOMAIN (PHOBIUS); NON_CYTOPLASMIC_DOMAIN (PHOBIUS); TRANSMEMBRANE (PHOBIUS); NON_CYTOPLASMIC_DOMAIN (PHOBIUS); TRANSMEMBRANE (PHOBIUS); IPR017853 (SUPERFAMILY); TMhelix (TMHMM)                                                                                                                                                                                                                                                                                                                                                                                                                                                                                                                                                                                                                                                                                                          |
| 2097 | c40841_g1_i1_len_652_path_6206_0_12_622<br>9_13_13_6220_14_210_3883_211_213_3886<br>_214_308_3645_309_335_5_3 | 5084  | brasiliensin precursor                                                                                        | 218  | 1.49E-26  | 50.10% | 0.106 | IPR002350 (SMART); IPR002350 (PFAM); G3DSA:3.30.60.30 (GENE3D); PTHR10913:SF46 (PANTHER); PTHR10913 (PANTHER); IPR002350 (PROSITE_PROFILES); IPR002350 (PROSITE_PROFILES); IPR002350 (PROSITE_PROFILES); IPR002350 (PROSITE_PROFILES); SSF100895 (SUPERFAMILY); SSF100895 (SUPERFAMILY); SSF100895 (SUPERFAMILY)                                                                                                                                                                                                                                                                                                                                                                                                                                                                                                                                                                                                                                                                                                                                                                                                                                                                                        |
| 2098 | c40841_g2_i1_len_1681_path_1991_0_1325_<br>3317_1326_1336_3328_1337_1358_6112_13<br>59_1359_3351_1360_1362_5  | 12103 | kazal-type protease inhibitor                                                                                 | 560  | 3.25E-10  | 53.80% | 0.115 | IPR002350 (SMART); IPR002350 (PFAM); IPR002350 (PFAM); G3DSA:3.30.60.30 (GENE3D); CYTOPLASMIC_DOMAIN (PHOBIUS); TRANSMEMBRANE (PHOBIUS); CYTOPLASMIC_DOMAIN (PHOBIUS); NON_CYTOPLASMIC_DOMAIN (PHOBIUS); TRANSMEMBRANE (PHOBIUS); IPR002350 (PROSITE_PROFILES); IPR002350 (PROSITE_PROFILES); SSF100895 (SUPERFAMILY); SSF100895 (SUPERFAMILY)                                                                                                                                                                                                                                                                                                                                                                                                                                                                                                                                                                                                                                                                                                                                                                                                                                                          |
| 2099 | c40856_g1_i1_len_4997_path_8043_0_1631_<br>23818_1632_2746_10784_2747_4319_1234<br>6_4320_4443_298_44_1       | 1465  | annu_scham ame: full=annulin ame: full=protein-glutamine gamma-glutamyltransferase ame: full=transglutaminase | 1666 | 0         | 74.00% | 0.107 | IPR002931 (SMART); IPR013783 (G3DSA:2.60.40.GENE3D); IPR001102 (PFAM); IPR002931 (G3DSA:3.90.260.GENE3D); IPR002931 (PFAM); IPR013783 (G3DSA:2.60.40.GENE3D); IPR008958 (PFAM); IPR013783 (G3DSA:2.60.40.GENE3D); IPR023608 (PANTHER); PTHR11590:SF16 (PANTHER); TRANSMEMBRANE (PHOBIUS); NON_CYTOPLASMIC_DOMAIN (PHOBIUS); TRANSMEMBRANE (PHOBIUS); CYTOPLASMIC_DOMAIN (PHOBIUS); NON_CYTOPLASMIC_DOMAIN (PHOBIUS); TRANSMEMBRANE (PHOBIUS); TRANSMEMBRANE (PHOBIUS); NON_CYTOPLASMIC_DOMAIN (PHOBIUS); IPR008958 (SUPERFAMILY); IPR008958 (SUPERFAMILY); IPR014756 (SUPERFAMILY); SSF54001 (SUPERFAMILY)                                                                                                                                                                                                                                                                                                                                                                                                                                                                                                                                                                                              |



|      |                                                                                                         |     |                                                      |     |           |        |       |                                                                                                                                                                                                                                                                                                                                                                                                                                                                                                                                                                                                           |
|------|---------------------------------------------------------------------------------------------------------|-----|------------------------------------------------------|-----|-----------|--------|-------|-----------------------------------------------------------------------------------------------------------------------------------------------------------------------------------------------------------------------------------------------------------------------------------------------------------------------------------------------------------------------------------------------------------------------------------------------------------------------------------------------------------------------------------------------------------------------------------------------------------|
| 2100 | c40856_g6_i1_len_1320_path_801_0_204_10_06_205_232_5058_233_1319_3                                      | 395 | gamma-interferon-inducible lysosomal thiol reductase | 440 | 1.50E-48  | 57.20% | 0.197 | IPR004911 (PFAM); IPR004911 (PANTHER); PTHR13234:SF8 (PANTHER); CYTOPLASMIC_DOMAIN (PHOBIUS); NON_CYTOPLASMIC_DOMAIN (PHOBIUS); TRANSMEMBRANE (PHOBIUS); NON_CYTOPLASMIC_DOMAIN (PHOBIUS); TRANSMEMBRANE (PHOBIUS); TRANSMEMBRANE (PHOBIUS); CYTOPLASMIC_DOMAIN (PHOBIUS); TMhelix (TMHMM); TMhelix (TMHMM)                                                                                                                                                                                                                                                                                               |
| 2101 | c40858_g1_i1_len_1866_path_1947_0_17_19_65_18_616_5384_617_683_7265_684_685_7267_686_1842_7481_2        | 507 | cytochrome p450                                      | 622 | 9.56E-165 | 73.60% | 0.164 | IPR002401 (PRINTS); IPR001128 (PRINTS); IPR001128 (G3DSA:1.10.630.GENE3D); IPR001128 (PFAM); PTHR24290 (PANTHER); PTHR24290:SF0 (PANTHER); IPR017972 (PROSITE_PATTERNS); NON_CYTOPLASMIC_DOMAIN (PHOBIUS); CYTOPLASMIC_DOMAIN (PHOBIUS); NON_CYTOPLASMIC_DOMAIN (PHOBIUS); TRANSMEMBRANE (PHOBIUS); TRANSMEMBRANE (PHOBIUS); IPR001128 (SUPERFAMILY)                                                                                                                                                                                                                                                      |
| 2102 | c40858_g1_i2_len_2024_path_844_0_841_72_65_842_843_7267_844_2000_7481_2001_2_023_1                      | 358 | cytochrome p450                                      | 675 | 5.97E-64  | 76.50% | 0.125 | IPR001128 (PRINTS); IPR002401 (PRINTS); IPR001128 (G3DSA:1.10.630.GENE3D); IPR001128 (PFAM); PTHR24290 (PANTHER); PTHR24290:SF0 (PANTHER); IPR017972 (PROSITE_PATTERNS); TRANSMEMBRANE (PHOBIUS); TRANSMEMBRANE (PHOBIUS); TRANSMEMBRANE (PHOBIUS); CYTOPLASMIC_DOMAIN (PHOBIUS); NON_CYTOPLASMIC_DOMAIN (PHOBIUS); TRANSMEMBRANE (PHOBIUS); NON_CYTOPLASMIC_DOMAIN (PHOBIUS); CYTOPLASMIC_DOMAIN (PHOBIUS); TRANSMEMBRANE (PHOBIUS); CYTOPLASMIC_DOMAIN (PHOBIUS); NON_CYTOPLASMIC_DOMAIN (PHOBIUS); TRANSMEMBRANE (PHOBIUS); IPR001128 (SUPERFAMILY); TMhelix (TMHMM); TMhelix (TMHMM); TMhelix (TMHMM) |
| 2103 | c40858_g1_i3_len_2426_path_4376_0_279_4_656_280_300_4677_301_409_1965_410_10_08_5384_1009_1075_726_1    | 658 | cytochrome p450                                      | 800 | 0         | 70.90% | 0.198 | IPR001128 (PRINTS); IPR002401 (PRINTS); IPR001128 (G3DSA:1.10.630.GENE3D); IPR001128 (PFAM); PTHR24290 (PANTHER); PTHR24290:SF0 (PANTHER); IPR017972 (PROSITE_PATTERNS); CYTOPLASMIC_DOMAIN (PHOBIUS); TRANSMEMBRANE (PHOBIUS); CYTOPLASMIC_DOMAIN (PHOBIUS); TRANSMEMBRANE (PHOBIUS); NON_CYTOPLASMIC_DOMAIN (PHOBIUS); TRANSMEMBRANE (PHOBIUS); NON_CYTOPLASMIC_DOMAIN (PHOBIUS); IPR001128 (SUPERFAMILY); TMhelix (TMHMM)                                                                                                                                                                              |
| 2104 | c40858_g1_i4_len_2189_path_4376_0_279_4_656_280_300_4677_301_409_1965_410_10_08_7267_1009_2165_1        | 562 | cytochrome p450                                      | 730 | 0         | 67.30% | 0.198 | IPR002401 (PRINTS); IPR001128 (PRINTS); IPR001128 (G3DSA:1.10.630.GENE3D); IPR001128 (PFAM); PTHR24290 (PANTHER); PTHR24290:SF0 (PANTHER); IPR017972 (PROSITE_PATTERNS); CYTOPLASMIC_DOMAIN (PHOBIUS); TRANSMEMBRANE (PHOBIUS); TRANSMEMBRANE (PHOBIUS); NON_CYTOPLASMIC_DOMAIN (PHOBIUS); NON_CYTOPLASMIC_DOMAIN (PHOBIUS); TRANSMEMBRANE (PHOBIUS); CYTOPLASMIC_DOMAIN (PHOBIUS); IPR001128 (SUPERFAMILY); TMhelix (TMHMM)                                                                                                                                                                              |
| 2105 | c40861_g1_i1_len_2866_path_8242_0_158_2_5_159_444_311_445_469_8695_470_548_87_74_549_595_1655_596_994_4 | 628 | epithelial chloride channel partial                  | 955 | 0         | 52.50% | 0.114 | IPR002035 (SMART); IPR015394 (PFAM); IPR013642 (PFAM); IPR013783 (G3DSA:2.60.40.GENE3D); PF13519 (PFAM); IPR002035 (G3DSA:3.40.50.GENE3D); PTHR10579 (PANTHER); PTHR10579:SF8 (PANTHER); IPR002035 (PROSITE_PROFILES); IPR002035 (SUPERFAMILY); IPR003961 (SUPERFAMILY); TMhelix (TMHMM)                                                                                                                                                                                                                                                                                                                  |
| 2106 | c40861_g1_i2_len_724_path_12477_0_28_12_506_29_43_964_44_142_1063_143_187_105_61_188_528_14246_529_53_4 | 113 | calcium-activated chloride channel regulator 4-like  | 241 | 6.00E-30  | 62.10% | 0.138 | IPR013642 (PFAM); PTHR10579 (PANTHER); PTHR10579:SF8 (PANTHER)                                                                                                                                                                                                                                                                                                                                                                                                                                                                                                                                            |
| 2107 | c40861_g1_i3_len_2753_path_8242_0_158_2_5_159_444_311_445_469_8695_470_548_87_74_549_595_1655_596_994_5 | 630 | epithelial chloride channel partial                  | 917 | 0         | 52.50% | 0.149 | IPR002035 (SMART); IPR002035 (G3DSA:3.40.50.GENE3D); PF13519 (PFAM); IPR013783 (G3DSA:2.60.40.GENE3D); IPR015394 (PFAM); IPR013642 (PFAM); PTHR10579:SF8 (PANTHER); PTHR10579 (PANTHER); IPR002035 (PROSITE_PROFILES); IPR002035 (SUPERFAMILY); IPR003961 (SUPERFAMILY); TMhelix (TMHMM)                                                                                                                                                                                                                                                                                                                  |
| 2108 | c40861_g1_i4_len_2884_path_8242_0_158_2_5_159_444_311_445_469_8695_470_548_87_74_549_595_1655_596_994_4 | 655 | epithelial chloride channel partial                  | 961 | 0         | 52.50% | 0.138 | IPR002035 (SMART); IPR013642 (PFAM); PF13519 (PFAM); IPR015394 (PFAM); IPR002035 (G3DSA:3.40.50.GENE3D); IPR013783 (G3DSA:2.60.40.GENE3D); PTHR10579:SF8 (PANTHER); PTHR10579 (PANTHER); IPR002035 (PROSITE_PROFILES); IPR003961 (SUPERFAMILY); IPR002035 (SUPERFAMILY)                                                                                                                                                                                                                                                                                                                                   |

|      |                                                                                                         |       |                                                     |      |           |         |         |                                                                                                                                                                                                                                                                                                                                                                                                                                                                                                                                                                                                                                 |
|------|---------------------------------------------------------------------------------------------------------|-------|-----------------------------------------------------|------|-----------|---------|---------|---------------------------------------------------------------------------------------------------------------------------------------------------------------------------------------------------------------------------------------------------------------------------------------------------------------------------------------------------------------------------------------------------------------------------------------------------------------------------------------------------------------------------------------------------------------------------------------------------------------------------------|
| 2109 | c40861_g2_i1_len_3852_path_7153_0_1088_8242_1089_1247_8400_1248_1518_311_1519_1543_13056_1544_1622_3    | 1051  | calcium-activated chloride channel regulator 4-like | 1284 | 0         | 53.60%  | 0.128   | IPR002035 (SMART); IPR003961 (SMART); IPR015394 (PFAM); IPR002035 (G3DSA:3.40.50.GENE3D); IPR013783 (G3DSA:2.60.40.GENE3D); PF13519 (PFAM); IPR013642 (PFAM); PTHR10579 (PANTHER); PTHR10579:SF8 (PANTHER); TRANSMEMBRANE (PHOBIUS); TRANSMEMBRANE (PHOBIUS); NON_CYTOPLASMIC_DOMAIN (PHOBIUS); CYTOPLASMIC_DOMAIN (PHOBIUS); CYTOPLASMIC_DOMAIN (PHOBIUS); IPR002035 (PROSITE_PROFILES); IPR003961 (SUPERFAMILY); IPR002035 (SUPERFAMILY); TMhelix (TMHMM); TMhelix (TMHMM)                                                                                                                                                    |
| 2110 | c40865_g1_i1_len_351_path_5759_0_67_137_0_68_220_236_221_238_1756_239_273_782_7_274_313_5087_314_325_2  | 139   | ubiquitin isoform cra_e                             | 117  | 1.19E-56  | 100.00% | 0.245   | IPR019956 (PRINTS); IPR000626 (SMART); IPR000626 (PFAM); G3DSA:3.10.20.90 (GENE3D); G3DSA:3.10.20.90 (GENE3D); PTHR10666 (PANTHER); IPR019954 (PROSITE_PATTERNS); IPR000626 (PROSITE_PROFILES); IPR029071 (SUPERFAMILY)                                                                                                                                                                                                                                                                                                                                                                                                         |
| 2111 | c40865_g1_i2_len_594_path_5759_0_67_137_0_68_220_236_221_238_8569_239_241_857_2_242_249_264_250_593_2   | 2645  | ubiquitin-40s ribosomal protein s27a-like           | 198  | 2.54E-94  | 96.10%  | 0.245   | IPR019956 (PRINTS); IPR000626 (SMART); IPR002906 (PFAM); G3DSA:3.10.20.90 (GENE3D); IPR000626 (PFAM); PTHR10666:SF99 (PANTHER); PTHR10666 (PANTHER); IPR019954 (PROSITE_PATTERNS); IPR000626 (PROSITE_PROFILES); IPR029071 (SUPERFAMILY); IPR011332 (SUPERFAMILY)                                                                                                                                                                                                                                                                                                                                                               |
| 2112 | c40865_g4_i1_len_306_path_5046_0_40_508_7_41_52_3912_53_196_30_197_202_8339_2_03_208_42_209_248_82_24_2 | 381   | polyubiquitin-b- partial                            | 102  | 7.85E-64  | 100.00% | 0.214   | IPR019956 (PRINTS); IPR000626 (SMART); G3DSA:3.10.20.90 (GENE3D); IPR000626 (PFAM); G3DSA:3.10.20.90 (GENE3D); PTHR10666 (PANTHER); IPR019954 (PROSITE_PATTERNS); IPR000626 (PROSITE_PROFILES); IPR029071 (SUPERFAMILY)                                                                                                                                                                                                                                                                                                                                                                                                         |
| 2113 | c40865_g6_i1_len_780_path_3380_0_56_236_57_74_1756_75_109_4398_110_212_2833_213_241_2862_242_779_0      | 1195  | ubiquitin c                                         | 260  | 1.20E-82  | 99.40%  | 0.113   | IPR019956 (PRINTS); IPR000626 (SMART); G3DSA:3.10.20.90 (GENE3D); IPR000626 (PFAM); PTHR10666 (PANTHER); IPR019954 (PROSITE_PATTERNS); NON_CYTOPLASMIC_DOMAIN (PHOBIUS); TRANSMEMBRANE (PHOBIUS); CYTOPLASMIC_DOMAIN (PHOBIUS); IPR000626 (PROSITE_PROFILES); IPR000626 (PROSITE_PROFILES); IPR029071 (SUPERFAMILY); IPR029071 (SUPERFAMILY); TMhelix (TMHMM); TMhelix (TMHMM)                                                                                                                                                                                                                                                  |
| 2114 | c40865_g7_i1_len_321_path_2657_0_175_28_33_176_204_4952_205_274_8339_275_280_42_281_320_2               | 132   | ubiquitin-40s ribosomal protein partial             | 107  | 5.30E-44  | 96.80%  | 0.418Y  | IPR019956 (PRINTS); IPR000626 (SMART); IPR000626 (PFAM); G3DSA:3.10.20.90 (GENE3D); PTHR10666 (PANTHER); IPR019954 (PROSITE_PATTERNS); IPR000626 (PROSITE_PROFILES); IPR029071 (SUPERFAMILY)                                                                                                                                                                                                                                                                                                                                                                                                                                    |
| 2115 | c40871_g8_i1_len_1672_path_29264_0_872_42099_873_873_30137_874_874_24327_875_1049_30308_1050_1074_2_2   | 1227  | thioredoxin peroxidase                              | 557  | 5.78E-134 | 87.40%  | 0.694 Y | IPR019479 (PFAM); IPR012336 (G3DSA:3.40.30.GENE3D); IPR000866 (PFAM); PTHR10681 (PANTHER); PTHR10681:SF101 (PANTHER); NON_CYTOPLASMIC_DOMAIN (PHOBIUS); TRANSMEMBRANE (PHOBIUS); SIGNAL_PEPTIDE_C_REGION (PHOBIUS); SIGNAL_PEPTIDE_N_REGION (PHOBIUS); CYTOPLASMIC_DOMAIN (PHOBIUS); SIGNAL_PEPTIDE (PHOBIUS); TRANSMEMBRANE (PHOBIUS); NON_CYTOPLASMIC_DOMAIN (PHOBIUS); SIGNAL_PEPTIDE_H_REGION (PHOBIUS); IPR012336 (PROSITE_PROFILES); SignalP-noTM (SIGNALP_EUK); SignalP-noTM (SIGNALP_GRAM_NEGATIVE); SignalP-TM (SIGNALP_GRAM_POSITIVE); IPR012336 (SUPERFAMILY); TMhelix (TMHMM); TMhelix (TMHMM); TMhelix (TMHMM)     |
| 2116 | c40871_g8_i2_len_1476_path_29264_0_872_42099_873_873_30137_874_874_24327_875_1049_23874_1050_1383_2_2   | 1085  | thioredoxin peroxidase                              | 492  | 4.97E-136 | 87.40%  | 0.694Y  | IPR019479 (PFAM); IPR000866 (PFAM); IPR012336 (G3DSA:3.40.30.GENE3D); PTHR10681 (PANTHER); PTHR10681:SF101 (PANTHER); SIGNAL_PEPTIDE_H_REGION (PHOBIUS); CYTOPLASMIC_DOMAIN (PHOBIUS); SIGNAL_PEPTIDE_N_REGION (PHOBIUS); TRANSMEMBRANE (PHOBIUS); NON_CYTOPLASMIC_DOMAIN (PHOBIUS); SIGNAL_PEPTIDE (PHOBIUS); NON_CYTOPLASMIC_DOMAIN (PHOBIUS); TRANSMEMBRANE (PHOBIUS); SIGNAL_PEPTIDE_C_REGION (PHOBIUS); TRANSMEMBRANE (PHOBIUS); CYTOPLASMIC_DOMAIN (PHOBIUS); IPR012336 (PROSITE_PROFILES); SignalP-TM (SIGNALP_GRAM_POSITIVE); SignalP-noTM (SIGNALP_GRAM_NEGATIVE); SignalP-noTM (SIGNALP_EUK); IPR012336 (SUPERFAMILY) |
| 2117 | c40872_g1_i1_len_1768_path_661_0_953_25_954_957_29_958_1105_489_1106_1127_51_1_1128_1160_4425_1161_1_4  | 13508 | anti-lipopolysaccharide factor isoform 7            | 589  | 1.35E-28  | 64.00%  | 0.11    | IPR024509 (PFAM); NON_CYTOPLASMIC_DOMAIN (PHOBIUS); CYTOPLASMIC_DOMAIN (PHOBIUS); TRANSMEMBRANE (PHOBIUS); NON_CYTOPLASMIC_DOMAIN (PHOBIUS); TRANSMEMBRANE (PHOBIUS); CYTOPLASMIC_DOMAIN (PHOBIUS); TRANSMEMBRANE (PHOBIUS); IPR024716 (PRODOM); TMhelix (TMHMM); TMhelix (TMHMM); TMhelix (TMHMM); TMhelix (TMHMM)                                                                                                                                                                                                                                                                                                             |

|      |                                                                                                   |        |                                                                   |      |           |        |       |                                                                                                                                                                                                                                                                                                                                                                                                                                                                                                                                                                                                                                                                                                                                                                                                                                      |
|------|---------------------------------------------------------------------------------------------------|--------|-------------------------------------------------------------------|------|-----------|--------|-------|--------------------------------------------------------------------------------------------------------------------------------------------------------------------------------------------------------------------------------------------------------------------------------------------------------------------------------------------------------------------------------------------------------------------------------------------------------------------------------------------------------------------------------------------------------------------------------------------------------------------------------------------------------------------------------------------------------------------------------------------------------------------------------------------------------------------------------------|
| 2118 | c40873_g1_i1_len_5679_path_7989_0_5678_4                                                          | 260520 | vitellogenin fused with superoxide dismutase                      | 1893 | 0         | 45.70% | 0.177 | IPR001747 (SMART); IPR001846 (SMART); IPR015816 (G3DSA:2.30.230.GENE3D); IPR001747 (PFAM); IPR001846 (PFAM); IPR015818 (G3DSA:2.20.80.GENE3D); IPR011030 (G3DSA:1.25.10.GENE3D); IPR015255 (PFAM); PTHR23345:SF1 (PANTHER); PTHR23345 (PANTHER); TRANSMEMBRANE (PHOBIUS); CYTOPLASMIC_DOMAIN (PHOBIUS); TRANSMEMBRANE (PHOBIUS); TRANSMEMBRANE (PHOBIUS); TRANSMEMBRANE (PHOBIUS); CYTOPLASMIC_DOMAIN (PHOBIUS); NON_CYTOPLASMIC_DOMAIN (PHOBIUS); CYTOPLASMIC_DOMAIN (PHOBIUS); NON_CYTOPLASMIC_DOMAIN (PHOBIUS); TRANSMEMBRANE (PHOBIUS); IPR001747 (PROSITE_PROFILES); IPR001846 (PROSITE_PROFILES); IPR015819 (SUPERFAMILY); IPR015819 (SUPERFAMILY); IPR011030 (SUPERFAMILY); TMhelix (TMHMM); TMhelix (TMHMM); TMhelix (TMHMM)                                                                                                 |
| 2119 | c40883_g1_i1_len_3576_path_443_0_759_35_2_760_1156_1591_1157_1177_8515__1178_2229_2661_2230_228_1 | 741    | hypothetical protein DAPPUDRAFT_321105                            | 1192 | 0         | 64.70% | 0.144 | IPR002223 (PRINTS); IPR002223 (SMART); IPR000884 (SMART); IPR002223 (G3DSA:4.10.410.GENE3D); IPR000884 (PFAM); IPR002223 (PFAM); IPR002861 (PFAM); G3DSA:2.20.100.10 (GENE3D); G3DSA:2.20.100.10 (GENE3D); IPR009465 (PFAM); PTHR11311 (PANTHER); IPR020901 (PROSITE_PATTERNS); CYTOPLASMIC_DOMAIN (PHOBIUS); TRANSMEMBRANE (PHOBIUS); CYTOPLASMIC_DOMAIN (PHOBIUS); NON_CYTOPLASMIC_DOMAIN (PHOBIUS); TRANSMEMBRANE (PHOBIUS); IPR000884 (PROSITE_PROFILES); IPR000884 (PROSITE_PROFILES); IPR002223 (PROSITE_PROFILES); IPR000884 (PROSITE_PROFILES); IPR009465 (PROSITE_PROFILES); IPR000884 (PROSITE_PROFILES); IPR002861 (PROSITE_PROFILES); IPR000884 (PROSITE_PROFILES); IPR000884 (SUPERFAMILY); IPR000884 (SUPERFAMILY); IPR000884 (SUPERFAMILY); IPR000884 (SUPERFAMILY); IPR000884 (SUPERFAMILY); IPR002223 (SUPERFAMILY) |
| 2120 | c40883_g1_i2_len_3520_path_443_0_759_35_2_760_1156_1591_1157_1177_8515__1178_2229_423_2230_3519_1 | 670    | spondin-1 isoform x1                                              | 1173 | 0         | 66.30% | 0.144 | IPR002223 (PRINTS); IPR002223 (SMART); IPR000884 (SMART); G3DSA:2.20.100.10 (GENE3D); IPR009465 (PFAM); IPR002223 (G3DSA:4.10.410.GENE3D); IPR002861 (PFAM); IPR002223 (PFAM); G3DSA:2.20.100.10 (GENE3D); IPR000884 (PFAM); PTHR11311 (PANTHER); IPR020901 (PROSITE_PATTERNS); TRANSMEMBRANE (PHOBIUS); CYTOPLASMIC_DOMAIN (PHOBIUS); TRANSMEMBRANE (PHOBIUS); CYTOPLASMIC_DOMAIN (PHOBIUS); TRANSMEMBRANE (PHOBIUS); CYTOPLASMIC_DOMAIN (PHOBIUS); NON_CYTOPLASMIC_DOMAIN (PHOBIUS); TRANSMEMBRANE (PHOBIUS); IPR000884 (PROSITE_PROFILES); IPR000884 (PROSITE_PROFILES); IPR009465 (PROSITE_PROFILES); IPR002861 (PROSITE_PROFILES); IPR000884 (PROSITE_PROFILES); IPR002223 (PROSITE_PROFILES); IPR000884 (SUPERFAMILY); IPR002223 (SUPERFAMILY); IPR000884 (SUPERFAMILY); IPR000884 (SUPERFAMILY)                               |
| 2121 | c40883_g1_i2_len_3520_path_443_0_759_35_2_760_1156_1591_1157_1177_8515__1178_2229_423_2230_3519_2 | 670    | perq amino acid-rich with gyf domain-containing protein 2-like    | 1173 | 2.88E-23  | 60.60% | 0.262 | IPR000884 (SMART); G3DSA:2.20.100.10 (GENE3D); IPR000884 (PFAM); TRANSMEMBRANE (PHOBIUS); NON_CYTOPLASMIC_DOMAIN (PHOBIUS); CYTOPLASMIC_DOMAIN (PHOBIUS); IPR000884 (PROSITE_PROFILES); IPR000884 (SUPERFAMILY)                                                                                                                                                                                                                                                                                                                                                                                                                                                                                                                                                                                                                      |
| 2122 | c40886_g2_i1_len_5092_path_9769_0_283_2_8_284_2899_2644_2900_2903_2648__2904_3883_3628__3884_0    | 839    | tyrosine-protein phosphatase non-receptor type 13-like isoform x3 | 1698 | 3.14E-140 | 52.50% | 0.114 | IPR001478 (SMART); IPR001478 (G3DSA:2.30.42.GENE3D); IPR001478 (G3DSA:2.30.42.GENE3D); IPR001478 (PFAM); IPR001478 (G3DSA:2.30.42.GENE3D); PTHR19964 (PANTHER); PTHR19964:SF32 (PANTHER); TRANSMEMBRANE (PHOBIUS); NON_CYTOPLASMIC_DOMAIN (PHOBIUS); TRANSMEMBRANE (PHOBIUS); TRANSMEMBRANE (PHOBIUS); NON_CYTOPLASMIC_DOMAIN (PHOBIUS); CYTOPLASMIC_DOMAIN (PHOBIUS); NON_CYTOPLASMIC_DOMAIN (PHOBIUS); CYTOPLASMIC_DOMAIN (PHOBIUS); TRANSMEMBRANE (PHOBIUS); IPR001478 (PROSITE_PROFILES); IPR001478 (PROSITE_PROFILES); IPR001478 (PROSITE_PROFILES); IPR001478 (SUPERFAMILY); IPR001478 (SUPERFAMILY); IPR001478 (SUPERFAMILY)                                                                                                                                                                                                  |

|      |                                                                                                        |      |                                                                   |      |           |        |       |                                                                                                                                                                                                                                                                                                                                                                                                                                                                                                                                                                                                                                                                                                                                                            |
|------|--------------------------------------------------------------------------------------------------------|------|-------------------------------------------------------------------|------|-----------|--------|-------|------------------------------------------------------------------------------------------------------------------------------------------------------------------------------------------------------------------------------------------------------------------------------------------------------------------------------------------------------------------------------------------------------------------------------------------------------------------------------------------------------------------------------------------------------------------------------------------------------------------------------------------------------------------------------------------------------------------------------------------------------------|
| 2123 | c40886_g2_i2_len_4836_path_1_0_26_28_2_7_2642_2644_2643_2646_2648_2647_3626_11122_3627_3627_3_1        | 828  | tyrosine-protein phosphatase non-receptor type 13-like isoform x3 | 1612 | 2.84E-141 | 52.70% | 0.17  | IPR001478 (SMART); IPR001478 (G3DSA:2.30.42.GENE3D); IPR001478 (G3DSA:2.30.42.GENE3D); IPR001478 (G3DSA:2.30.42.GENE3D); IPR001478 (PFAM); PTHR19964:SF32 (PANTHER); PTHR19964 (PANTHER); NON_CYTOPLASMIC_DOMAIN (PHOBIUS); TRANSMEMBRANE (PHOBIUS); NON_CYTOPLASMIC_DOMAIN (PHOBIUS); CYTOPLASMIC_DOMAIN (PHOBIUS); TRANSMEMBRANE (PHOBIUS); NON_CYTOPLASMIC_DOMAIN (PHOBIUS); TRANSMEMBRANE (PHOBIUS); TRANSMEMBRANE (PHOBIUS); TRANSMEMBRANE (PHOBIUS); CYTOPLASMIC_DOMAIN (PHOBIUS); CYTOPLASMIC_DOMAIN (PHOBIUS); CYTOPLASMIC_DOMAIN (PHOBIUS); IPR001478 (PROSITE_PROFILES); IPR001478 (PROSITE_PROFILES); IPR001478 (PROSITE_PROFILES); IPR001478 (SUPERFAMILY); IPR001478 (SUPERFAMILY); IPR001478 (SUPERFAMILY); TMhelix (TMHMM); TMhelix (TMHMM) |
| 2124 | c40895_g2_i3_len_2862_path_4_0_167_172_168_254_10096_255_436_441_437_471_101_62_472_490_10181_491_50_4 | 693  | von willebrand factor-like                                        | 954  | 8.65E-17  | 42.20% | 0.11  | Coil (COILS); Coil (COILS); PR01217 (PRINTS); IPR001846 (SMART); IPR001846 (PFAM); G3DSA:2.10.70.10 (GENE3D); IPR014853 (PFAM); PTHR11339 (PANTHER); CYTOPLASMIC_DOMAIN (PHOBIUS); TRANSMEMBRANE (PHOBIUS); NON_CYTOPLASMIC_DOMAIN (PHOBIUS); NON_CYTOPLASMIC_DOMAIN (PHOBIUS); TRANSMEMBRANE (PHOBIUS); IPR000436 (PROSITE_PROFILES); IPR001846 (PROSITE_PROFILES); IPR000436 (PROSITE_PROFILES); SignalP-TM (SIGNALP_GRAM_POSITIVE); IPR000436 (SUPERFAMILY); TMhelix (TMHMM)                                                                                                                                                                                                                                                                            |
| 2127 | c40906_g1_i1_len_3867_path_11569_0_1475_6276_1476_1833_3092_1834_2059_3318_2060_2082_3341_208_5        | 8464 | cellulosome anchoring protein cohesin region                      | 1289 | 4.57E-10  | 46.40% | 0.114 | Coil (COILS); Coil (COILS); Coil (COILS); PR01217 (PRINTS); TRANSMEMBRANE (PHOBIUS); CYTOPLASMIC_DOMAIN (PHOBIUS); NON_CYTOPLASMIC_DOMAIN (PHOBIUS); CYTOPLASMIC_DOMAIN (PHOBIUS); TRANSMEMBRANE (PHOBIUS); NON_CYTOPLASMIC_DOMAIN (PHOBIUS); TRANSMEMBRANE (PHOBIUS); TMhelix (TMHMM); TMhelix (TMHMM)                                                                                                                                                                                                                                                                                                                                                                                                                                                    |
| 2125 | c40906_g1_i11_len_4029_path_11569_0_147_5_6276_1476_1833_3092_1834_2059_3318_2060_2082_3341_20_5       | 8854 | cellulosome anchoring protein cohesin region                      | 1343 | 3.53E-10  | 45.60% | 0.114 | Coil (COILS); Coil (COILS); Coil (COILS); PR01217 (PRINTS); TRANSMEMBRANE (PHOBIUS); NON_CYTOPLASMIC_DOMAIN (PHOBIUS); CYTOPLASMIC_DOMAIN (PHOBIUS); NON_CYTOPLASMIC_DOMAIN (PHOBIUS); TRANSMEMBRANE (PHOBIUS); CYTOPLASMIC_DOMAIN (PHOBIUS); TRANSMEMBRANE (PHOBIUS); TMhelix (TMHMM); TMhelix (TMHMM)                                                                                                                                                                                                                                                                                                                                                                                                                                                    |
| 2126 | c40906_g1_i12_len_4032_path_11569_0_147_5_6276_1476_1833_3092_1834_2059_3318_2060_2082_3341_20_5       | 8502 | cellulosome anchoring protein cohesin region                      | 1344 | 3.94E-10  | 45.60% | 0.114 | Coil (COILS); Coil (COILS); Coil (COILS); PR01217 (PRINTS); TRANSMEMBRANE (PHOBIUS); NON_CYTOPLASMIC_DOMAIN (PHOBIUS); CYTOPLASMIC_DOMAIN (PHOBIUS); TRANSMEMBRANE (PHOBIUS); NON_CYTOPLASMIC_DOMAIN (PHOBIUS); TRANSMEMBRANE (PHOBIUS); TMhelix (TMHMM); TMhelix (TMHMM)                                                                                                                                                                                                                                                                                                                                                                                                                                                                                  |
| 2128 | c40906_g1_i2_len_4632_path_11569_0_1475_6276_1476_1833_3092_1834_2059_3318_2060_2082_3341_208_5        | 8669 | cellulosome anchoring protein cohesin region                      | 1544 | 9.60E-12  | 45.20% | 0.11  | Coil (COILS); Coil (COILS); PR01217 (PRINTS); NON_CYTOPLASMIC_DOMAIN (PHOBIUS); TRANSMEMBRANE (PHOBIUS); TRANSMEMBRANE (PHOBIUS); TRANSMEMBRANE (PHOBIUS); NON_CYTOPLASMIC_DOMAIN (PHOBIUS); TRANSMEMBRANE (PHOBIUS); TRANSMEMBRANE (PHOBIUS); CYTOPLASMIC_DOMAIN (PHOBIUS); TRANSMEMBRANE (PHOBIUS); CYTOPLASMIC_DOMAIN (PHOBIUS); TRANSMEMBRANE (PHOBIUS); CYTOPLASMIC_DOMAIN (PHOBIUS); TRANSMEMBRANE (PHOBIUS); NON_CYTOPLASMIC_DOMAIN (PHOBIUS); CYTOPLASMIC_DOMAIN (PHOBIUS); NON_CYTOPLASMIC_DOMAIN (PHOBIUS); NON_CYTOPLASMIC_DOMAIN (PHOBIUS); TRANSMEMBRANE (PHOBIUS); TMhelix (TMHMM); TMhelix (TMHMM); TMhelix (TMHMM); TMhelix (TMHMM); TMhelix (TMHMM); TMhelix (TMHMM)                                                                      |
| 2129 | c40906_g1_i3_len_4098_path_11569_0_1475_6276_1476_1833_3092_1834_2059_3318_2060_2082_3341_208_5        | 8535 | cellulosome anchoring protein cohesin region                      | 1366 | 3.21E-10  | 45.60% | 0.114 | Coil (COILS); Coil (COILS); PR01217 (PRINTS); CYTOPLASMIC_DOMAIN (PHOBIUS); TRANSMEMBRANE (PHOBIUS); NON_CYTOPLASMIC_DOMAIN (PHOBIUS); NON_CYTOPLASMIC_DOMAIN (PHOBIUS); CYTOPLASMIC_DOMAIN (PHOBIUS); TRANSMEMBRANE (PHOBIUS); TRANSMEMBRANE (PHOBIUS); TMhelix (TMHMM); TMhelix (TMHMM); TMhelix (TMHMM)                                                                                                                                                                                                                                                                                                                                                                                                                                                 |

[illegible]



|      |                                                                                                      |      |                                                           |      |          |        |         |                                                                                                                                                                                                                                                                                                                                                                                                                                                                                                                                                                                                                                                                                                                                                                                                                                                                                                                                                                                                         |
|------|------------------------------------------------------------------------------------------------------|------|-----------------------------------------------------------|------|----------|--------|---------|---------------------------------------------------------------------------------------------------------------------------------------------------------------------------------------------------------------------------------------------------------------------------------------------------------------------------------------------------------------------------------------------------------------------------------------------------------------------------------------------------------------------------------------------------------------------------------------------------------------------------------------------------------------------------------------------------------------------------------------------------------------------------------------------------------------------------------------------------------------------------------------------------------------------------------------------------------------------------------------------------------|
| 2135 | c40906_g1_i9_len_4521_path_11569_0_1475_6276_1476_1833_3092_1834_2059_3318_2060_2082_3341_208_5      | 8716 | cellulosome anchoring protein cohesin region              | 1507 | 2.36E-11 | 45.00% | 0.11    | Coil (COILS); Coil (COILS); Coil (COILS); PR01217 (PRINTS); TRANSMEMBRANE (PHOBIUS); TRANSMEMBRANE (PHOBIUS); NON_CYTOPLASMIC_DOMAIN (PHOBIUS); NON_CYTOPLASMIC_DOMAIN (PHOBIUS); CYTOPLASMIC_DOMAIN (PHOBIUS); TRANSMEMBRANE (PHOBIUS); TRANSMEMBRANE (PHOBIUS); TRANSMEMBRANE (PHOBIUS); NON_CYTOPLASMIC_DOMAIN (PHOBIUS); NON_CYTOPLASMIC_DOMAIN (PHOBIUS); TRANSMEMBRANE (PHOBIUS); CYTOPLASMIC_DOMAIN (PHOBIUS); TRANSMEMBRANE (PHOBIUS); CYTOPLASMIC_DOMAIN (PHOBIUS); CYTOPLASMIC_DOMAIN (PHOBIUS); TRANSMEMBRANE (PHOBIUS); TMhelix (TMHMM); TMhelix (TMHMM)                                                                                                                                                                                                                                                                                                                              |
| 2136 | c40913_g3_i1_len_3085_path_1048_0_82_10_73_83_161_1152_162_198_7504_199_519_1_287_520_1011_8315_10_5 | 755  | kielin chordin-like protein isoform x1                    | 1028 | 9.64E-42 | 50.30% | 0.102   | IPR002223 (PRINTS); IPR002223 (SMART); IPR003961 (SMART); IPR002350 (SMART); IPR003645 (SMART); IPR000742 (SMART); G3DSA:3.30.60.30 (GENE3D); IPR013783 (G3DSA:2.60.40.GENE3D); IPR002223 (G3DSA:4.10.410.GENE3D); IPR002223 (G3DSA:4.10.410.GENE3D); IPR002223 (PFAM); G3DSA:2.170.300.10 (GENE3D); IPR002350 (PFAM); IPR003961 (PFAM); PTHR10083 (PANTHER); IPR013032 (PROSITE_PATTERNS); IPR020901 (PROSITE_PATTERNS); IPR020901 (PROSITE_PATTERNS); IPR020901 (PROSITE_PATTERNS); IPR013032 (PROSITE_PATTERNS); IPR002223 (PROSITE_PROFILES); IPR003961 (PROSITE_PROFILES); IPR000742 (PROSITE_PROFILES); IPR002350 (PROSITE_PROFILES); IPR003961 (PROSITE_PROFILES); IPR002223 (PROSITE_PROFILES); IPR002223 (PROSITE_PROFILES); IPR000742 (PROSITE_PROFILES); IPR003961 (PROSITE_PROFILES); SSF57196 (SUPERFAMILY); IPR002223 (SUPERFAMILY); IPR002223 (SUPERFAMILY); IPR002223 (SUPERFAMILY); IPR002223 (SUPERFAMILY); IPR003961 (SUPERFAMILY); SSF100895 (SUPERFAMILY); IPR003961 (SUPERFAMILY) |
| 2137 | c40913_g3_i2_len_2595_path_1257_0_29_12_87_30_521_8315_522_2594_5                                    | 509  | kunitz bovine pancreatic trypsin inhibitor domain protein | 865  | 4.11E-38 | 41.00% | 0.102   | IPR002223 (PRINTS); IPR003645 (SMART); IPR002223 (SMART); IPR003961 (SMART); IPR002350 (SMART); IPR002223 (G3DSA:4.10.410.GENE3D); IPR002223 (PFAM); IPR013783 (G3DSA:2.60.40.GENE3D); IPR003961 (PFAM); G3DSA:3.30.60.30 (GENE3D); IPR002350 (PFAM); IPR002223 (G3DSA:4.10.410.GENE3D); PTHR10083 (PANTHER); IPR020901 (PROSITE_PATTERNS); IPR020901 (PROSITE_PATTERNS); IPR020901 (PROSITE_PATTERNS); IPR020901 (PROSITE_PATTERNS); IPR013032 (PROSITE_PATTERNS); IPR002223 (PROSITE_PROFILES); IPR002223 (PROSITE_PROFILES); IPR003961 (PROSITE_PROFILES); IPR000742 (PROSITE_PROFILES); IPR002350 (PROSITE_PROFILES); IPR003961 (PROSITE_PROFILES); IPR002223 (PROSITE_PROFILES); IPR002223 (PROSITE_PROFILES); IPR003961 (PROSITE_PROFILES); IPR003961 (SUPERFAMILY); SSF100895 (SUPERFAMILY); IPR002223 (SUPERFAMILY); IPR003961 (SUPERFAMILY); SSF57196 (SUPERFAMILY); IPR002223 (SUPERFAMILY); IPR002223 (SUPERFAMILY); IPR002223 (SUPERFAMILY)                                                 |
| 2138 | c40913_g3_i3_len_1161_path_1048_0_82_10_73_83_161_1152_162_198_7504_199_519_1_287_520_1011_25_1012_4 | 317  | kielin chordin-like protein isoform x1                    | 387  | 5.60E-44 | 51.60% | 0.224   | IPR000742 (SMART); IPR002350 (SMART); G3DSA:2.10.25.10 (GENE3D); IPR002350 (PFAM); G3DSA:3.30.60.30 (GENE3D); G3DSA:2.10.25.10 (GENE3D); PTHR10913 (PANTHER); PTHR10913:SF45 (PANTHER); IPR013032 (PROSITE_PATTERNS); IPR013032 (PROSITE_PATTERNS); TRANSMEMBRANE (PHOBIUS); NON_CYTOPLASMIC_DOMAIN (PHOBIUS); CYTOPLASMIC_DOMAIN (PHOBIUS); IPR002350 (PROSITE_PROFILES); IPR000742 (PROSITE_PROFILES); IPR000742 (PROSITE_PROFILES); SSF57196 (SUPERFAMILY); SSF57196 (SUPERFAMILY); SSF100895 (SUPERFAMILY)                                                                                                                                                                                                                                                                                                                                                                                                                                                                                          |
| 2139 | c40920_g1_i1_len_3184_path_313_0_3069_3_373_3070_3096_7782_3097_3156_3373_315_7_3183_0               | 1212 | beta-lactamase-like protein 2-like                        | 1062 | 3.26E-55 | 50.50% | 0.367 Y | IPR001466 (PFAM); IPR012338 (G3DSA:3.40.710.GENE3D); PTHR22935 (PANTHER); PTHR22935:SF64 (PANTHER); CYTOPLASMIC_DOMAIN (PHOBIUS); TRANSMEMBRANE (PHOBIUS); NON_CYTOPLASMIC_DOMAIN (PHOBIUS); IPR012338 (SUPERFAMILY)                                                                                                                                                                                                                                                                                                                                                                                                                                                                                                                                                                                                                                                                                                                                                                                    |

|      |                                                                                                               |       |                                        |      |           |        |         |                                                                                                                                                                                                                                                                                                                                                                                                                                                                                                                                                                                                                                                                                                                           |
|------|---------------------------------------------------------------------------------------------------------------|-------|----------------------------------------|------|-----------|--------|---------|---------------------------------------------------------------------------------------------------------------------------------------------------------------------------------------------------------------------------------------------------------------------------------------------------------------------------------------------------------------------------------------------------------------------------------------------------------------------------------------------------------------------------------------------------------------------------------------------------------------------------------------------------------------------------------------------------------------------------|
| 2140 | c40928_g3_i1_len_2641_path_7718_0_535_2<br>1590_536_548_8266_549_606_8324_607_63<br>8_8356_639_693_8411_694_1 | 6572  | 14-3-3 protein zeta isoform x1         | 880  | 6.55E-165 | 96.40% | 0.131   | Coil (COILS); Coil (COILS); IPR000308 (PRINTS); IPR023410 (SMART); G3DSA:1.20.190.20 (GENE3D); IPR023410 (PFAM); IPR000308 (PANTHER); IPR023409 (PROSITE_PATTERNS); IPR023409 (PROSITE_PATTERNS); NON_CYTOPLASMIC_DOMAIN (PHOBIUS); TRANSMEMBRANE (PHOBIUS); TRANSMEMBRANE (PHOBIUS); CYTOPLASMIC_DOMAIN (PHOBIUS); NON_CYTOPLASMIC_DOMAIN (PHOBIUS); IPR023410 (SUPERFAMILY); TMhelix (TMHMM); TMhelix (TMHMM); TMhelix (TMHMM)                                                                                                                                                                                                                                                                                          |
| 2141 | c40941_g3_i1_len_3871_path_2241_0_48_22<br>90_49_72_23997_73_589_29692_590_590_2<br>9631_591_604_29645_605_3  | 2596  | hypothetical protein DAPPUDRAFT_200882 | 1291 | 0         | 60.50% | 0.107   | IPR018497 (PRINTS); IPR024079 (G3DSA:3.40.390.GENE3D); IPR008753 (PFAM); IPR018497 (PFAM); IPR000718 (PANTHER); PTHR11733:SF111 (PANTHER); NON_CYTOPLASMIC_DOMAIN (PHOBIUS); NON_CYTOPLASMIC_DOMAIN (PHOBIUS); TRANSMEMBRANE (PHOBIUS); TRANSMEMBRANE (PHOBIUS); TRANSMEMBRANE (PHOBIUS); TRANSMEMBRANE (PHOBIUS); NON_CYTOPLASMIC_DOMAIN (PHOBIUS); CYTOPLASMIC_DOMAIN (PHOBIUS); CYTOPLASMIC_DOMAIN (PHOBIUS); SSF55486 (SUPERFAMILY); TMhelix (TMHMM); TMhelix (TMHMM); TMhelix (TMHMM); TMhelix (TMHMM); TMhelix (TMHMM)                                                                                                                                                                                              |
| 2142 | c40943_g1_i1_len_1482_path_5599_0_633_3<br>684_634_938_1589_939_1052_1702_1053_1<br>099_956_1100_1124_1773_4  | 2594  | pacifastin light chain                 | 494  | 4.42E-16  | 51.50% | 0.125   | IPR008037 (PFAM); NON_CYTOPLASMIC_DOMAIN (PHOBIUS); NON_CYTOPLASMIC_DOMAIN (PHOBIUS); TRANSMEMBRANE (PHOBIUS); TRANSMEMBRANE (PHOBIUS); TRANSMEMBRANE (PHOBIUS); CYTOPLASMIC_DOMAIN (PHOBIUS); CYTOPLASMIC_DOMAIN (PHOBIUS); TRANSMEMBRANE (PHOBIUS); TRANSMEMBRANE (PHOBIUS); TRANSMEMBRANE (PHOBIUS); CYTOPLASMIC_DOMAIN (PHOBIUS); IPR020862 (PROSITE_PROFILES); IPR020862 (PROSITE_PROFILES); IPR008037 (SUPERFAMILY); IPR008037 (SUPERFAMILY); IPR008037 (SUPERFAMILY); TMhelix (TMHMM); TMhelix (TMHMM); TMhelix (TMHMM); TMhelix (TMHMM)                                                                                                                                                                           |
| 2143 | c40943_g1_i2_len_1462_path_5599_0_633_3<br>684_634_938_1589_939_1052_1702_1053_1<br>099_956_1100_1124_1773_5  | 2532  | pacifastin light chain                 | 487  | 4.18E-16  | 50.90% | 0.226   | IPR008037 (PFAM); SIGNAL_PEPTIDE_N_REGION (PHOBIUS); TRANSMEMBRANE (PHOBIUS); TRANSMEMBRANE (PHOBIUS); TRANSMEMBRANE (PHOBIUS); CYTOPLASMIC_DOMAIN (PHOBIUS); CYTOPLASMIC_DOMAIN (PHOBIUS); SIGNAL_PEPTIDE_C_REGION (PHOBIUS); NON_CYTOPLASMIC_DOMAIN (PHOBIUS); TRANSMEMBRANE (PHOBIUS); CYTOPLASMIC_DOMAIN (PHOBIUS); NON_CYTOPLASMIC_DOMAIN (PHOBIUS); SIGNAL_PEPTIDE_H_REGION (PHOBIUS); NON_CYTOPLASMIC_DOMAIN (PHOBIUS); TRANSMEMBRANE (PHOBIUS); SIGNAL_PEPTIDE (PHOBIUS); IPR020862 (PROSITE_PROFILES); IPR020862 (PROSITE_PROFILES); IPR020862 (PROSITE_PROFILES); IPR008037 (SUPERFAMILY); IPR008037 (SUPERFAMILY); IPR008037 (SUPERFAMILY); TMhelix (TMHMM); TMhelix (TMHMM); TMhelix (TMHMM); TMhelix (TMHMM) |
| 2144 | c40943_g2_i1_len_1173_path_1009_0_370_7<br>555_371_376_1384_377_378_1386_379_414<br>_7584_415_431_42_432_58_5 | 1512  | pacifastin light chain                 | 391  | 7.04E-16  | 51.10% | 0.425Y  | IPR008037 (PFAM); NON_CYTOPLASMIC_DOMAIN (PHOBIUS); CYTOPLASMIC_DOMAIN (PHOBIUS); TRANSMEMBRANE (PHOBIUS); IPR020862 (PROSITE_PROFILES); IPR020862 (PROSITE_PROFILES); IPR020862 (PROSITE_PROFILES); IPR008037 (SUPERFAMILY); IPR008037 (SUPERFAMILY); TMhelix (TMHMM)                                                                                                                                                                                                                                                                                                                                                                                                                                                    |
| 2145 | c40947_g1_i1_len_908_path_3739_0_31_377<br>0_32_36_230_37_80_3818_81_103_3841_10<br>4_344_5872_345_350_1135_3 | 26544 | trypsinogen 2                          | 303  | 3.39E-101 | 70.50% | 0.803 Y | IPR001314 (PRINTS); IPR001254 (SMART); G3DSA:2.40.10.10 (GENE3D); G3DSA:2.40.10.10 (GENE3D); IPR001254 (PFAM); PTHR24264 (PANTHER); IPR018114 (PROSITE_PATTERNS); SIGNAL_PEPTIDE (PHOBIUS); NON_CYTOPLASMIC_DOMAIN (PHOBIUS); SIGNAL_PEPTIDE_N_REGION (PHOBIUS); SIGNAL_PEPTIDE_H_REGION (PHOBIUS); SIGNAL_PEPTIDE_C_REGION (PHOBIUS); IPR001254 (PROSITE_PROFILES); SignalP-noTM (SIGNALP_EUK); SignalP-TM (SIGNALP_GRAM_POSITIVE); SignalP-noTM (SIGNALP_GRAM_NEGATIVE); IPR009003 (SUPERFAMILY)                                                                                                                                                                                                                        |
| 2146 | c40947_g1_i2_len_916_path_3739_0_31_377<br>0_32_36_230_37_80_3818_81_103_3841_10<br>4_344_3219_345_363_5941_5 | 20101 | trypsin 3                              | 305  | 1.84E-105 | 71.90% | 0.753Y  | IPR001314 (PRINTS); IPR001254 (SMART); G3DSA:2.40.10.10 (GENE3D); IPR001254 (PFAM); G3DSA:2.40.10.10 (GENE3D); PTHR24276 (PANTHER); IPR018114 (PROSITE_PATTERNS); IPR018114 (PROSITE_PATTERNS); SIGNAL_PEPTIDE_H_REGION (PHOBIUS); NON_CYTOPLASMIC_DOMAIN (PHOBIUS); SIGNAL_PEPTIDE_N_REGION (PHOBIUS); SIGNAL_PEPTIDE_C_REGION (PHOBIUS); SIGNAL_PEPTIDE (PHOBIUS); IPR001254 (PROSITE_PROFILES); SignalP-noTM (SIGNALP_EUK); SignalP-TM (SIGNALP_GRAM_POSITIVE); SignalP-noTM (SIGNALP_GRAM_NEGATIVE); IPR009003 (SUPERFAMILY); TMhelix (TMHMM)                                                                                                                                                                         |

|      |                                                                                                        |       |                                           |      |           |        |         |                                                                                                                                                                                                                                                                                                                                                                                                                                                                                                                                                                                                                                                          |
|------|--------------------------------------------------------------------------------------------------------|-------|-------------------------------------------|------|-----------|--------|---------|----------------------------------------------------------------------------------------------------------------------------------------------------------------------------------------------------------------------------------------------------------------------------------------------------------------------------------------------------------------------------------------------------------------------------------------------------------------------------------------------------------------------------------------------------------------------------------------------------------------------------------------------------------|
| 2147 | c40947_g1_i3_len_1324_path_2469_0_752_3_219_753_771_5941_772_777_3243_778_784_364_785_817_4785_818_1_5 | 17711 | trypsinogen 2                             | 441  | 3.09E-105 | 72.30% | 0.753 Y | IPR001314 (PRINTS); IPR001254 (SMART); IPR001254 (PFAM); G3DSA:2.40.10.10 (GENE3D); G3DSA:2.40.10.10 (GENE3D); PTHR24265 (PANTHER); IPR018114 (PROSITE_PATTERNS); IPR018114 (PROSITE_PATTERNS); TRANSMEMBRANE (PHOBIUS); SIGNAL_PEPTIDE (PHOBIUS); NON_CYTOPLASMIC_DOMAIN (PHOBIUS); SIGNAL_PEPTIDE_N_REGION (PHOBIUS); SIGNAL_PEPTIDE_H_REGION (PHOBIUS); CYTOPLASMIC_DOMAIN (PHOBIUS); SIGNAL_PEPTIDE_C_REGION (PHOBIUS); IPR001254 (PROSITE_PROFILES); SignalP-noTM (SIGNALP_EUK); SignalP-TM (SIGNALP_GRAM_POSITIVE); SignalP-noTM (SIGNALP_GRAM_NEGATIVE); IPR009003 (SUPERFAMILY); TMhelix (TMHMM)                                                 |
| 2148 | c40953_g3_i1_len_1971_path_1822_0_250_2_073_251_342_6737_343_361_6105_362_371_6115_372_374_6788_375_5  | 855   | apolipoprotein d                          | 657  | 1.05E-08  | 45.00% | 0.099   | IPR012674 (G3DSA:2.40.128.GENE3D); IPR000566 (PFAM); PTHR10612 (PANTHER); PTHR10612:SF7 (PANTHER); IPR022272 (PROSITE_PATTERNS); TRANSMEMBRANE (PHOBIUS); TRANSMEMBRANE (PHOBIUS); TRANSMEMBRANE (PHOBIUS); NON_CYTOPLASMIC_DOMAIN (PHOBIUS); NON_CYTOPLASMIC_DOMAIN (PHOBIUS); CYTOPLASMIC_DOMAIN (PHOBIUS); CYTOPLASMIC_DOMAIN (PHOBIUS); TRANSMEMBRANE (PHOBIUS); NON_CYTOPLASMIC_DOMAIN (PHOBIUS); IPR011038 (SUPERFAMILY)                                                                                                                                                                                                                           |
| 2149 | c40964_g1_i1_len_3530_path_150_0_32_77_33_81_4906_82_343_5168_344_3529_3                               | 930   | glucose-6-phosphate isomerase             | 1177 | 0         | 87.70% | 0.105   | IPR001672 (PRINTS); G3DSA:3.40.50.10490 (GENE3D); IPR001672 (PFAM); IPR023096 (G3DSA:1.10.1390.GENE3D); PTHR11469:SF4 (PANTHER); IPR001672 (PANTHER); IPR018189 (PROSITE_PATTERNS); IPR018189 (PROSITE_PATTERNS); TRANSMEMBRANE (PHOBIUS); TRANSMEMBRANE (PHOBIUS); CYTOPLASMIC_DOMAIN (PHOBIUS); TRANSMEMBRANE (PHOBIUS); CYTOPLASMIC_DOMAIN (PHOBIUS); TRANSMEMBRANE (PHOBIUS); NON_CYTOPLASMIC_DOMAIN (PHOBIUS); NON_CYTOPLASMIC_DOMAIN (PHOBIUS); CYTOPLASMIC_DOMAIN (PHOBIUS); NON_CYTOPLASMIC_DOMAIN (PHOBIUS); TRANSMEMBRANE (PHOBIUS); IPR001672 (PROSITE_PROFILES); IPR001672 (HAMAP); SSF53697 (SUPERFAMILY); TMhelix (TMHMM); TMhelix (TMHMM) |
| 2150 | c40972_g16_i1_len_2015_path_6245_0_80_6_326_81_83_6329_84_1811_8057_1812_185_0_5793_1851_1861_3891_0   | 896   | phosphatidylethanolamine-binding protein  | 672  | 1.17E-90  | 79.90% | 0.125   | IPR008914 (G3DSA:3.90.280.GENE3D); IPR008914 (PFAM); PTHR11362 (PANTHER); IPR008914 (SUPERFAMILY)                                                                                                                                                                                                                                                                                                                                                                                                                                                                                                                                                        |
| 2151 | c40973_g1_i1_len_2249_path_8887_0_323_2_583_324_625_2885_626_630_2890_631_67_9_2939_680_707_2967_7_4   | 1296  | cell recognition protein caspr4 isoform 5 | 750  | 2.17E-69  | 52.00% | 0.127   | Coil (COILS); IPR001073 (SMART); IPR000885 (PFAM); IPR001073 (PFAM); IPR014716 (G3DSA:3.90.215.GENE3D); IPR008983 (G3DSA:2.60.120.GENE3D); PTHR10127 (PANTHER); PTHR10127:SF575 (PANTHER); CYTOPLASMIC_DOMAIN (PHOBIUS); NON_CYTOPLASMIC_DOMAIN (PHOBIUS); TRANSMEMBRANE (PHOBIUS); IPR001073 (PROSITE_PROFILES); IPR002181 (PROSITE_PROFILES); IPR002181 (SUPERFAMILY); IPR002181 (SUPERFAMILY); IPR008983 (SUPERFAMILY); TMhelix (TMHMM); TMhelix (TMHMM)                                                                                                                                                                                              |
| 2152 | c40973_g1_i2_len_2082_path_17592_0_36_2_461_37_99_2524_100_105_2530_106_132_2_557_133_158_2583_159_5   | 1224  | contactin associated protein 1            | 694  | 7.92E-69  | 51.90% | 0.255   | Coil (COILS); IPR001073 (SMART); IPR014716 (G3DSA:3.90.215.GENE3D); IPR008983 (G3DSA:2.60.120.GENE3D); IPR000885 (PFAM); IPR001073 (PFAM); PTHR10127:SF575 (PANTHER); PTHR10127 (PANTHER); TRANSMEMBRANE (PHOBIUS); NON_CYTOPLASMIC_DOMAIN (PHOBIUS); CYTOPLASMIC_DOMAIN (PHOBIUS); CYTOPLASMIC_DOMAIN (PHOBIUS); CYTOPLASMIC_DOMAIN (PHOBIUS); TRANSMEMBRANE (PHOBIUS); TRANSMEMBRANE (PHOBIUS); NON_CYTOPLASMIC_DOMAIN (PHOBIUS); IPR002181 (PROSITE_PROFILES); IPR001073 (PROSITE_PROFILES); IPR002181 (SUPERFAMILY); IPR002181 (SUPERFAMILY); IPR008983 (SUPERFAMILY); TMhelix (TMHMM); TMhelix (TMHMM); TMhelix (TMHMM)                             |
| 2153 | c40973_g1_i3_len_2084_path_17592_0_36_2_461_37_99_2524_100_105_2530_106_132_2_557_133_158_2583_159_4   | 1280  | cell recognition protein caspr4 isoform 5 | 695  | 1.22E-69  | 52.20% | 0.127   | Coil (COILS); IPR001073 (SMART); IPR000885 (PFAM); IPR008983 (G3DSA:2.60.120.GENE3D); IPR014716 (G3DSA:3.90.215.GENE3D); IPR001073 (PFAM); PTHR10127 (PANTHER); PTHR10127:SF575 (PANTHER); NON_CYTOPLASMIC_DOMAIN (PHOBIUS); TRANSMEMBRANE (PHOBIUS); CYTOPLASMIC_DOMAIN (PHOBIUS); TRANSMEMBRANE (PHOBIUS); NON_CYTOPLASMIC_DOMAIN (PHOBIUS); IPR002181 (PROSITE_PROFILES); IPR001073 (PROSITE_PROFILES); IPR002181 (SUPERFAMILY); IPR002181 (SUPERFAMILY); IPR008983 (SUPERFAMILY); TMhelix (TMHMM); TMhelix (TMHMM); TMhelix (TMHMM)                                                                                                                  |

|      |                                                                                                     |    |                                         |     |          |        |         |                                                                                                                                                                                                                                                                                                                                                                                                                                                                                                                                                                                                                                                  |
|------|-----------------------------------------------------------------------------------------------------|----|-----------------------------------------|-----|----------|--------|---------|--------------------------------------------------------------------------------------------------------------------------------------------------------------------------------------------------------------------------------------------------------------------------------------------------------------------------------------------------------------------------------------------------------------------------------------------------------------------------------------------------------------------------------------------------------------------------------------------------------------------------------------------------|
| 2154 | c40981_g1_i1_len_1043_path_821_0_56_878_57_116_2465_117_133_2482_134_176_396_177_264_484_265_552_5  | 39 | zinc finger protein 699-like isoform x1 | 347 | 1.61E-22 | 62.00% | 0.102   | IPR015880 (SMART); IPR007087 (PFAM); PF13465 (PFAM); IPR013087 (G3DSA:3.30.160.GENE3D); IPR013087 (G3DSA:3.30.160.GENE3D); IPR013087 (G3DSA:3.30.160.GENE3D); IPR013087 (G3DSA:3.30.160.GENE3D); PTHR24409 (PANTHER); PTHR24409:SF14 (PANTHER); IPR007087 (PROSITE_PATTERNS); IPR007087 (PROSITE_PATTERNS); IPR007087 (PROSITE_PATTERNS); IPR007087 (PROSITE_PROFILES); IPR007087 (PROSITE_PROFILES); IPR007087 (PROSITE_PROFILES); IPR026590 (PROSITE_PROFILES); IPR007087 (PROSITE_PROFILES); SSF57667 (SUPERFAMILY); SSF57667 (SUPERFAMILY)                                                                                                   |
| 2155 | c40981_g1_i4_len_900_path_1196_0_205_87_8_206_265_5380_266_282_2482_283_325_2_523_326_413_484_414_4 | 21 | zinc finger protein 77 isoform x1       | 300 | 2.86E-31 | 59.90% | 0.596 Y | IPR015880 (SMART); IPR013087 (G3DSA:3.30.160.GENE3D); PF13465 (PFAM); IPR013087 (G3DSA:3.30.160.GENE3D); IPR013087 (G3DSA:3.30.160.GENE3D); PF13894 (PFAM); IPR007087 (PFAM); IPR013087 (G3DSA:3.30.160.GENE3D); PTHR24409 (PANTHER); PTHR24409:SF14 (PANTHER); IPR007087 (PROSITE_PATTERNS); IPR007087 (PROSITE_PATTERNS); IPR007087 (PROSITE_PATTERNS); IPR007087 (PROSITE_PATTERNS); IPR007087 (PROSITE_PROFILES); IPR007087 (PROSITE_PROFILES); IPR007087 (PROSITE_PROFILES); IPR007087 (PROSITE_PROFILES); IPR007087 (PROSITE_PROFILES); SignalP-noTM (SIGNALP_EUK); SSF57667 (SUPERFAMILY); SSF57667 (SUPERFAMILY); SSF57667 (SUPERFAMILY) |
| 2156 | c40981_g2_i1_len_418_path_1871_0_231_21_03_232_256_1035_257_417_4                                   | 11 | zinc finger protein 699-like            | 139 | 1.52E-23 | 62.30% | 0.101   | IPR015880 (SMART); IPR013087 (G3DSA:3.30.160.GENE3D); PF13465 (PFAM); IPR013087 (G3DSA:3.30.160.GENE3D); PF13894 (PFAM); PTHR24409 (PANTHER); PTHR24409:SF13 (PANTHER); IPR007087 (PROSITE_PATTERNS); IPR007087 (PROSITE_PATTERNS); IPR007087 (PROSITE_PATTERNS); IPR007087 (PROSITE_PATTERNS); IPR007087 (PROSITE_PROFILES); IPR007087 (PROSITE_PROFILES); IPR007087 (PROSITE_PROFILES); IPR007087 (PROSITE_PROFILES); SSF57667 (SUPERFAMILY); SSF57667 (SUPERFAMILY)                                                                                                                                                                           |

|  |                                                                                                               |       |                             |      |           |        |       |                                                                                                                                                                                                                                                                                                                                                                                                                                                                                                                                                                                                                                                                                                                                                                                                                                                                                                                                                                                                                                                                                                                                                                                                                                                                                                                                                                                                                                                                                                                                                                                                                                                                                                                                                                                                                                                                                                                                                                                                                                                                                                                                                                                                                                                                                                                                                                                    |
|--|---------------------------------------------------------------------------------------------------------------|-------|-----------------------------|------|-----------|--------|-------|------------------------------------------------------------------------------------------------------------------------------------------------------------------------------------------------------------------------------------------------------------------------------------------------------------------------------------------------------------------------------------------------------------------------------------------------------------------------------------------------------------------------------------------------------------------------------------------------------------------------------------------------------------------------------------------------------------------------------------------------------------------------------------------------------------------------------------------------------------------------------------------------------------------------------------------------------------------------------------------------------------------------------------------------------------------------------------------------------------------------------------------------------------------------------------------------------------------------------------------------------------------------------------------------------------------------------------------------------------------------------------------------------------------------------------------------------------------------------------------------------------------------------------------------------------------------------------------------------------------------------------------------------------------------------------------------------------------------------------------------------------------------------------------------------------------------------------------------------------------------------------------------------------------------------------------------------------------------------------------------------------------------------------------------------------------------------------------------------------------------------------------------------------------------------------------------------------------------------------------------------------------------------------------------------------------------------------------------------------------------------------|
|  | c40983_g1_i1_len_12655_path_2321_0_1055<br>1_28820__10552_12309_14604_12310_1231<br>1_711_12312_12359_146_2   | 17356 | twitchin isoform x4         | 4218 | 0         | 80.90% | 0.101 | (SMART); IPR002290 (SMART); IPR003599 (SMART); IPR013783 (G3DSA:2.60.40.GENE3D); IPR013783 (G3DSA:2.60.40.GENE3D); G3DSA:1.10.510.10 (GENE3D); IPR013783 (G3DSA:2.60.40.GENE3D); IPR013783 (G3DSA:2.60.40.GENE3D); G3DSA:3.30.200.20 (GENE3D); IPR000719 (PFAM); IPR013098 (PFAM); IPR013783 (G3DSA:2.60.40.GENE3D); IPR013783 (G3DSA:2.60.40.GENE3D); IPR013783 (G3DSA:2.60.40.GENE3D); IPR013783 (G3DSA:2.60.40.GENE3D); IPR003961 (PFAM); IPR013783 (G3DSA:2.60.40.GENE3D); IPR013783 (G3DSA:2.60.40.GENE3D); IPR013783 (G3DSA:2.60.40.GENE3D); PTHR19897-SF155 (PANTHER); PTHR19897 (PANTHER); IPR017441 (PROSITE_PATTERNS); IPR008271 (PROSITE_PATTERNS); TRANSMEMBRANE (PHOBIUS); TRANSMEMBRANE (PHOBIUS); CYTOPLASMIC_DOMAIN (PHOBIUS); NON_CYTOPLASMIC_DOMAIN (PHOBIUS); NON_CYTOPLASMIC_DOMAIN (PHOBIUS); IPR003961 (PROSITE_PROFILES); IPR003961 (PROSITE_PROFILES); IPR003961 (PROSITE_PROFILES); IPR003961 (PROSITE_PROFILES); IPR003961 (PROSITE_PROFILES); IPR007110 (PROSITE_PROFILES); IPR007110 (PROSITE_PROFILES); IPR003961 (PROSITE_PROFILES); IPR003961 (PROSITE_PROFILES); IPR007110 (PROSITE_PROFILES); IPR003961 (PROSITE_PROFILES); IPR000719 (PROSITE_PROFILES); IPR003961 (PROSITE_PROFILES); IPR003961 (PROSITE_PROFILES); IPR003961 (PROSITE_PROFILES); IPR007110 (PROSITE_PROFILES); IPR007110 (PROSITE_PROFILES); IPR007110 (PROSITE_PROFILES); IPR003961 (PROSITE_PROFILES); IPR007110 (PROSITE_PROFILES); IPR007110 (PROSITE_PROFILES); IPR003961 (PROSITE_PROFILES); IPR007110 (PROSITE_PROFILES); IPR007110 (PROSITE_PROFILES); IPR003961 (SUPERFAMILY); IPR011009 (SUPERFAMILY); IPR003961 (SUPERFAMILY); SSF48726 (SUPERFAMILY); IPR003961 (SUPERFAMILY); SSF48726 (SUPERFAMILY); IPR003961 (SUPERFAMILY); IPR003961 (SUPERFAMILY); IPR003961 (SUPERFAMILY); IPR003961 (SUPERFAMILY); SSF48726 (SUPERFAMILY); SSF48726 (SUPERFAMILY); IPR003599 (SMART); IPR003598 (SMART); IPR013783 (G3DSA:2.60.40.GENE3D); IPR013783 (G3DSA:2.60.40.GENE3D); IPR013783 (G3DSA:2.60.40.GENE3D); IPR013098 (PFAM); PTHR19897 (PANTHER); NON_CYTOPLASMIC_DOMAIN (PHOBIUS); CYTOPLASMIC_DOMAIN (PHOBIUS); TRANSMEMBRANE (PHOBIUS); TRANSMEMBRANE (PHOBIUS); IPR007110 (PROSITE_PROFILES); IPR007110 (PROSITE_PROFILES); IPR007110 (PROSITE_PROFILES); SSF48726 (SUPERFAMILY); SSF48726 (SUPERFAMILY); SSF48726 (SUPERFAMILY); TMhelix (TMHMM); TMhelix (TMHMM) |
|  | c40983_g1_i2_len_2405_path_28171_0_301_<br>28820__302_2059_14604_2060_2061_711_2<br>062_2109_14651_2110_2_0   | 11442 | twitchin isoform x2         | 802  | 7.56E-133 | 76.20% | 0.125 | IPR029058 (G3DSA:3.40.50.GENE3D); IPR002018 (PFAM); PTHR11559 (PANTHER); CYTOPLASMIC_DOMAIN (PHOBIUS); TRANSMEMBRANE (PHOBIUS); CYTOPLASMIC_DOMAIN (PHOBIUS); TRANSMEMBRANE (PHOBIUS); TRANSMEMBRANE (PHOBIUS); NON_CYTOPLASMIC_DOMAIN (PHOBIUS); NON_CYTOPLASMIC_DOMAIN (PHOBIUS); TRANSMEMBRANE (PHOBIUS); NON_CYTOPLASMIC_DOMAIN (PHOBIUS); IPR029058 (SUPERFAMILY); TMhelix (TMHMM); TMhelix (TMHMM); TMhelix (TMHMM)                                                                                                                                                                                                                                                                                                                                                                                                                                                                                                                                                                                                                                                                                                                                                                                                                                                                                                                                                                                                                                                                                                                                                                                                                                                                                                                                                                                                                                                                                                                                                                                                                                                                                                                                                                                                                                                                                                                                                          |
|  | c40984_g1_i4_len_630_path_3268_0_45_761<br>9_46_58_179_59_177_298_178_201_2687_2<br>02_286_2770_287_314_800_0 | 42    | carboxyl cholinesterase 5as | 210  | 7.77E-10  | 72.30% | 0.251 | IPR023612 (PRINTS); IPR013856 (PFAM); IPR013856 (G3DSA:3.10.170.GENE3D); G3DSA:1.10.390.10 (GENE3D); IPR011096 (PFAM); IPR025711 (PFAM); IPR001570 (PFAM); CYTOPLASMIC_DOMAIN (PHOBIUS); TRANSMEMBRANE (PHOBIUS); NON_CYTOPLASMIC_DOMAIN (PHOBIUS); SSF55486 (SUPERFAMILY); TMhelix (TMHMM)                                                                                                                                                                                                                                                                                                                                                                                                                                                                                                                                                                                                                                                                                                                                                                                                                                                                                                                                                                                                                                                                                                                                                                                                                                                                                                                                                                                                                                                                                                                                                                                                                                                                                                                                                                                                                                                                                                                                                                                                                                                                                        |
|  | c41001_g1_i1_len_564_path_1238_0_210_47<br>93_211_278_1517_279_322_3731_323_563_<br>0                         | 51    | hemagglutinin               | 188  | 2.58E-42  | 67.60% | 0.098 | IPR001570 (PFAM); G3DSA:1.10.390.10 (GENE3D); SSF55486 (SUPERFAMILY)                                                                                                                                                                                                                                                                                                                                                                                                                                                                                                                                                                                                                                                                                                                                                                                                                                                                                                                                                                                                                                                                                                                                                                                                                                                                                                                                                                                                                                                                                                                                                                                                                                                                                                                                                                                                                                                                                                                                                                                                                                                                                                                                                                                                                                                                                                               |
|  | c41001_g1_i2_len_1756_path_1_0_252_254_<br>253_408_410__409_648_650_649_660_662_<br>661_795_797_796_820_8_1   | 887   | hemagglutinin proteinase    | 585  | 1.24E-101 | 54.70% | 0.125 | IPR023612 (PRINTS); IPR013856 (PFAM); IPR013856 (G3DSA:3.10.170.GENE3D); G3DSA:1.10.390.10 (GENE3D); IPR011096 (PFAM); IPR025711 (PFAM); IPR001570 (PFAM); CYTOPLASMIC_DOMAIN (PHOBIUS); TRANSMEMBRANE (PHOBIUS); NON_CYTOPLASMIC_DOMAIN (PHOBIUS); SSF55486 (SUPERFAMILY); TMhelix (TMHMM)                                                                                                                                                                                                                                                                                                                                                                                                                                                                                                                                                                                                                                                                                                                                                                                                                                                                                                                                                                                                                                                                                                                                                                                                                                                                                                                                                                                                                                                                                                                                                                                                                                                                                                                                                                                                                                                                                                                                                                                                                                                                                        |



[illegible]

|      |                                                                                                            |       |                                             |      |           |        |       |                                                                                                                                                                                                                                                                                                                                                                                                                                                                                                                                                                                                                                                                                                                                                                                                                                                                                                                 |
|------|------------------------------------------------------------------------------------------------------------|-------|---------------------------------------------|------|-----------|--------|-------|-----------------------------------------------------------------------------------------------------------------------------------------------------------------------------------------------------------------------------------------------------------------------------------------------------------------------------------------------------------------------------------------------------------------------------------------------------------------------------------------------------------------------------------------------------------------------------------------------------------------------------------------------------------------------------------------------------------------------------------------------------------------------------------------------------------------------------------------------------------------------------------------------------------------|
| 2166 | c41047_g1_i2_len_5318_path_207_0_150_35<br>8_151_2000_102_2001_3354_206__3355_40<br>29_23028_4030_4031_2_1 | 5435  | muscle m-line assembly protein unc-89       | 1773 | 0         | 75.60% | 0.291 | IPR003599 (SMART); IPR003598 (SMART); IPR003961 (SMART); G3DSA:3.30.200.20 (GENE3D); G3DSA:1.10.510.10 (GENE3D); G3DSA:1.10.510.10 (GENE3D); IPR000719 (PFAM); IPR013783 (G3DSA:2.60.40.GENE3D); IPR013098 (PFAM); IPR003961 (PFAM); G3DSA:3.30.200.20 (GENE3D); IPR013783 (G3DSA:2.60.40.GENE3D); IPR013783 (G3DSA:2.60.40.GENE3D); IPR020675 (PANTHER); PTHR22964:SF45 (PANTHER); IPR017441 (PROSITE_PATTERNS); CYTOPLASMIC_DOMAIN (PHOBIUS); NON_CYTOPLASMIC_DOMAIN (PHOBIUS); TRANSMEMBRANE (PHOBIUS); NON_CYTOPLASMIC_DOMAIN (PHOBIUS); TRANSMEMBRANE (PHOBIUS); IPR000719 (PROSITE_PROFILES); IPR003961 (PROSITE_PROFILES); IPR007110 (PROSITE_PROFILES); IPR000719 (PROSITE_PROFILES); IPR007110 (PROSITE_PROFILES); IPR003961 (SUPERFAMILY); IPR011009 (SUPERFAMILY); SSF48726 (SUPERFAMILY); SSF48726 (SUPERFAMILY); IPR011009 (SUPERFAMILY); SSF48726 (SUPERFAMILY); TMhelix (TMHMM); TMhelix (TMHMM) |
| 2167 | c41057_g1_i1_len_17457_path_48298_0_40_49592_41_42_6455_43_4679_11092_4680_14322_20735_14323_174_3         | 16841 | nesprin-1 isoform x4                        | 5819 | 0         | 69.60% | 0.111 | Coil (COILS); IPR018159 (SMART); G3DSA:1.20.58.60 (GENE3D); G3DSA:1.20.58.60 (GENE3D); G3DSA:1.20.58.60 (GENE3D); G3DSA:1.20.58.60 (GENE3D); SSF46966 (SUPERFAMILY); SSF46966 (SUPERFAMILY)                                                                                                                                                                                                                                                                                                                                                       |
| 2168 | c41057_g1_i3_len_20799_path_1_0_1905_19_07_1906_3567_3569_3568_3683_3685_3684_3687_3689_3688_3721_37_3     | 24783 | nesprin-1 isoform x3                        | 6933 | 6.36E-166 | 73.40% | 0.142 | Coil (COILS); Coil (COILS); Coil (COILS); Coil (COILS); Coil (COILS); Coil (COILS); IPR018159 (SMART); SSF46966 (SUPERFAMILY); SSF46966 (SUPERFAMILY)                                                                                                                                                                                                                                                                                                                                                                                                                                                                                                                                                                                                                                                                                                                                                           |
| 2169 | c41057_g1_i4_len_14388_path_48298_0_40_49592_41_42_6455_43_4679_11092_4680_14322_48157_14323_143_3         | 16479 | nesprin-1 isoform x3                        | 4796 | 4.08E-166 | 73.20% | 0.142 | Coil (COILS); Coil (COILS); Coil (COILS); Coil (COILS); Coil (COILS); Coil (COILS); IPR018159 (SMART); SSF46966 (SUPERFAMILY); SSF46966 (SUPERFAMILY)                                                                                                                                                                                                                                                                                                                                                                                                                                                                                                                                                                                                                                                                                                                                                           |
| 2170 | c41070_g2_i1_len_1696_path_731_0_29_760_30_371_13458_372_1670_8548_1671_169_5_0                            | 571   | nac-alpha domain-containing protein 1       | 566  | 7.93E-09  | 43.56% | 0.106 | Coil (COILS); TRANSMEMBRANE (PHOBIUS); CYTOPLASMIC_DOMAIN (PHOBIUS); NON_CYTOPLASMIC_DOMAIN (PHOBIUS)                                                                                                                                                                                                                                                                                                                                                                                                                                                                                                                                                                                                                                                                                                                                                                                                           |
| 2171 | c41070_g2_i3_len_2093_path_11260_0_121_13322_122_125_11386_126_323_11584_324_324_6621_325_512_2440_1       | 1631  | von willebrand factor type a domain protein | 698  | 1.39E-16  | 47.30% | 0.196 | TRANSMEMBRANE (PHOBIUS); CYTOPLASMIC_DOMAIN (PHOBIUS); NON_CYTOPLASMIC_DOMAIN (PHOBIUS); TMhelix (TMHMM)                                                                                                                                                                                                                                                                                                                                                                                                                                                                                                                                                                                                                                                                                                                                                                                                        |
| 2172 | c41070_g2_i4_len_1932_path_6458_0_29_17_3_30_163_6621_164_351_2440_352_353_69_99_354_607_13458_608_2       | 2056  | von willebrand factor type a domain protein | 644  | 1.23E-16  | 47.30% | 0.14  | TRANSMEMBRANE (PHOBIUS); NON_CYTOPLASMIC_DOMAIN (PHOBIUS); CYTOPLASMIC_DOMAIN (PHOBIUS)                                                                                                                                                                                                                                                                                                                                                                                                                                                                                                                                                                                                                                                                                                                                                                                                                         |
| 2173 | c41070_g2_i5_len_4057_path_6458_0_29_17_3_30_163_6621_164_351_6808_352_543_24_40_544_545_6999_546_799_2    | 3823  | neurofilament heavy polypeptide             | 1352 | 1.93E-33  | 44.90% | 0.14  | Coil (COILS); TRANSMEMBRANE (PHOBIUS); TRANSMEMBRANE (PHOBIUS); NON_CYTOPLASMIC_DOMAIN (PHOBIUS); CYTOPLASMIC_DOMAIN (PHOBIUS); NON_CYTOPLASMIC_DOMAIN (PHOBIUS); CYTOPLASMIC_DOMAIN (PHOBIUS); TRANSMEMBRANE (PHOBIUS); TRANSMEMBRANE (PHOBIUS); NON_CYTOPLASMIC_DOMAIN (PHOBIUS); CYTOPLASMIC_DOMAIN (PHOBIUS); TRANSMEMBRANE (PHOBIUS)                                                                                                                                                                                                                                                                                                                                                                                                                                                                                                                                                                       |
| 2174 | c41070_g2_i6_len_945_path_12998_0_216_6_999_217_470_11873_471_914_731_915_944_0                            | 400   | lpxtg-motif cell wall anchor domain protein | 315  | 9.78E-10  | 42.60% | 0.196 | no IPS match                                                                                                                                                                                                                                                                                                                                                                                                                                                                                                                                                                                                                                                                                                                                                                                                                                                                                                    |
| 2175 | c41078_g1_i1_len_2243_path_2583_0_257_2_841_258_277_2861_278_305_7154_306_329_8234_330_382_2966_383_1      | 268   | thromboxane a synthase-like protein         | 748  | 1.49E-116 | 56.20% | 0.11  | IPR001128 (PRINTS); IPR002401 (PRINTS); IPR001128 (G3DSA:1.10.630.GENE3D); IPR001128 (PFAM); PTHR24292 (PANTHER); PTHR24292:SF24 (PANTHER); IPR017972 (PROSITE_PATTERNS); TRANSMEMBRANE (PHOBIUS); TRANSMEMBRANE (PHOBIUS); CYTOPLASMIC_DOMAIN (PHOBIUS); TRANSMEMBRANE (PHOBIUS); NON_CYTOPLASMIC_DOMAIN (PHOBIUS); CYTOPLASMIC_DOMAIN (PHOBIUS); NON_CYTOPLASMIC_DOMAIN (PHOBIUS); IPR001128 (SUPERFAMILY); TMhelix (TMHMM); TMhelix (TMHMM)                                                                                                                                                                                                                                                                                                                                                                                                                                                                  |
| 2176 | c41078_g1_i2_len_2240_path_2583_0_257_4_915_258_277_2861_278_305_2889_306_382_2966_383_400_2984_401_1      | 244   | cytochrome p450 partial                     | 747  | 1.93E-109 | 56.80% | 0.11  | IPR001128 (PRINTS); IPR002401 (PRINTS); IPR001128 (G3DSA:1.10.630.GENE3D); IPR001128 (PFAM); PTHR24292 (PANTHER); IPR017972 (PROSITE_PATTERNS); TRANSMEMBRANE (PHOBIUS); NON_CYTOPLASMIC_DOMAIN (PHOBIUS); TRANSMEMBRANE (PHOBIUS); CYTOPLASMIC_DOMAIN (PHOBIUS); NON_CYTOPLASMIC_DOMAIN (PHOBIUS); CYTOPLASMIC_DOMAIN (PHOBIUS); TRANSMEMBRANE (PHOBIUS); IPR001128 (SUPERFAMILY); TMhelix (TMHMM); TMhelix (TMHMM)                                                                                                                                                                                                                                                                                                                                                                                                                                                                                            |

Supplementary Table 7

|      |                                                                                                               |       |                                            |      |           |        |         |                                                                                                                                                                                                                                                                                                                                                                                                                                                                                                                                                                                                                                                |
|------|---------------------------------------------------------------------------------------------------------------|-------|--------------------------------------------|------|-----------|--------|---------|------------------------------------------------------------------------------------------------------------------------------------------------------------------------------------------------------------------------------------------------------------------------------------------------------------------------------------------------------------------------------------------------------------------------------------------------------------------------------------------------------------------------------------------------------------------------------------------------------------------------------------------------|
| 2181 | c41079_g1_i6_len_2680_path_33_0_27_60_2<br>8_147_180_148_512_11717_513_523_686_<br>_524_1002_2400_1003_3      | 6125  | projectin short variant                    | 894  | 0         | 75.10% | 0.276   | Coil (COILS); IPR003598 (SMART); IPR003598 (SMART); IPR013783 (G3DSA:2.60.40.GENE3D); IPR013783 (G3DSA:2.60.40.GENE3D); IPR013783 (G3DSA:2.60.40.GENE3D); IPR013783 (G3DSA:2.60.40.GENE3D); IPR013098 (PFAM); PTHR19897 (PANTHER); PTHR19897:SF155 (PANTHER); IPR007110 (PROSITE_PROFILES); IPR007110 (PROSITE_PROFILES); IPR007110 (PROSITE_PROFILES); IPR007110 (PROSITE_PROFILES); SSF48726 (SUPERFAMILY); SSF48726 (SUPERFAMILY); SSF48726 (SUPERFAMILY); SSF48726 (SUPERFAMILY); SSF48726 (SUPERFAMILY); SSF48726 (SUPERFAMILY)                                                                                                           |
| 2182 | c41079_g1_i7_len_2809_path_33_0_27_60_2<br>8_147_435_148_273_11353_274_276_180_<br>277_641_11717_642_652_3    | 6123  | muscle m-line assembly protein unc-89-like | 937  | 0         | 75.30% | 0.276   | Coil (COILS); Coil (COILS); IPR003598 (SMART); IPR003599 (SMART); IPR013783 (G3DSA:2.60.40.GENE3D); IPR013783 (G3DSA:2.60.40.GENE3D); IPR013783 (G3DSA:2.60.40.GENE3D); IPR013098 (PFAM); IPR013783 (G3DSA:2.60.40.GENE3D); PTHR19897 (PANTHER); PTHR19897:SF155 (PANTHER); IPR007110 (PROSITE_PROFILES); IPR007110 (PROSITE_PROFILES); IPR007110 (PROSITE_PROFILES); IPR007110 (PROSITE_PROFILES); IPR007110 (PROSITE_PROFILES); SSF48726 (SUPERFAMILY); SSF48726 (SUPERFAMILY); SSF48726 (SUPERFAMILY); SSF48726 (SUPERFAMILY); SSF48726 (SUPERFAMILY); SSF48726 (SUPERFAMILY)                                                               |
| 2183 | c41079_g1_i8_len_2698_path_33_0_27_60_2<br>8_147_180_148_512_11717_513_523_686_<br>_524_1002_2400_1003_3      | 6021  | projectin short variant                    | 900  | 0         | 73.60% | 0.276   | Coil (COILS); IPR003598 (SMART); IPR003599 (SMART); IPR013783 (G3DSA:2.60.40.GENE3D); IPR013783 (G3DSA:2.60.40.GENE3D); IPR013098 (PFAM); IPR013783 (G3DSA:2.60.40.GENE3D); IPR013783 (G3DSA:2.60.40.GENE3D); PTHR19897 (PANTHER); PTHR19897:SF155 (PANTHER); IPR007110 (PROSITE_PROFILES); IPR007110 (PROSITE_PROFILES); IPR007110 (PROSITE_PROFILES); IPR007110 (PROSITE_PROFILES); IPR007110 (PROSITE_PROFILES); SSF48726 (SUPERFAMILY); SSF48726 (SUPERFAMILY); SSF48726 (SUPERFAMILY); SSF48726 (SUPERFAMILY); SSF48726 (SUPERFAMILY); SSF48726 (SUPERFAMILY)                                                                             |
| 2184 | c41089_g1_i1_len_2262_path_3267_0_134_3<br>401_135_165_2662_166_219_3485_220_240<br>_3506_241_268_3534_269_1  | 2921  | cytochrome p450 2j6-like                   | 754  | 2.66E-105 | 55.80% | 0.114   | IPR002401 (PRINTS); IPR001128 (PRINTS); IPR001128 (PFAM); IPR001128 (G3DSA:1.10.630.GENE3D); PTHR24300 (PANTHER); IPR017972 (PROSITE_PATTERNS); CYTOPLASMIC_DOMAIN (PHOBIUS); NON_CYTOPLASMIC_DOMAIN (PHOBIUS); TRANSMEMBRANE (PHOBIUS); TRANSMEMBRANE (PHOBIUS); CYTOPLASMIC_DOMAIN (PHOBIUS); NON_CYTOPLASMIC_DOMAIN (PHOBIUS); TRANSMEMBRANE (PHOBIUS); IPR001128 (SUPERFAMILY); TMhelix (TMHMM); TMhelix (TMHMM)                                                                                                                                                                                                                           |
| 2185 | c41089_g1_i2_len_2262_path_3267_0_134_2<br>631_135_165_2662_166_219_8768_220_240<br>_3506_241_268_8024_269_1  | 1848  | cytochrome p450 2j6-like                   | 754  | 5.66E-108 | 56.80% | 0.107   | IPR002401 (PRINTS); IPR001128 (PRINTS); IPR001128 (PFAM); IPR001128 (G3DSA:1.10.630.GENE3D); PTHR24300 (PANTHER); IPR017972 (PROSITE_PATTERNS); CYTOPLASMIC_DOMAIN (PHOBIUS); NON_CYTOPLASMIC_DOMAIN (PHOBIUS); CYTOPLASMIC_DOMAIN (PHOBIUS); TRANSMEMBRANE (PHOBIUS); TRANSMEMBRANE (PHOBIUS); IPR001128 (SUPERFAMILY); TMhelix (TMHMM); TMhelix (TMHMM)                                                                                                                                                                                                                                                                                      |
| 2186 | c41099_g3_i1_len_928_path_3576_0_57_363<br>4_58_376_10181_377_378_728_379_413_10<br>210_414_414_10211_415_4_0 | 70    | mariner mos1 transposase                   | 310  | 7.64E-26  | 58.30% | 0.171   | PTHR23345 (PANTHER); PTHR23345:SF1 (PANTHER); IPR001846 (PROSITE_PROFILES)                                                                                                                                                                                                                                                                                                                                                                                                                                                                                                                                                                     |
| 2187 | c41101_g1_i1_len_4153_path_6091_0_113_5<br>186_114_892_6981_893_894_4626_895_3<br>286_1368_3287_3287_2        | 15211 | ferritin 2 light chain homologue           | 1384 | 9.29E-33  | 54.10% | 0.352 Y | IPR008331 (PFAM); IPR012347 (G3DSA:1.20.1260.GENE3D); IPR001519 (PANTHER); PTHR11431:SF28 (PANTHER); TRANSMEMBRANE (PHOBIUS); NON_CYTOPLASMIC_DOMAIN (PHOBIUS); CYTOPLASMIC_DOMAIN (PHOBIUS); TRANSMEMBRANE (PHOBIUS); TRANSMEMBRANE (PHOBIUS); NON_CYTOPLASMIC_DOMAIN (PHOBIUS); NON_CYTOPLASMIC_DOMAIN (PHOBIUS); CYTOPLASMIC_DOMAIN (PHOBIUS); NON_CYTOPLASMIC_DOMAIN (PHOBIUS); CYTOPLASMIC_DOMAIN (PHOBIUS); TRANSMEMBRANE (PHOBIUS); TRANSMEMBRANE (PHOBIUS); TRANSMEMBRANE (PHOBIUS); TRANSMEMBRANE (PHOBIUS); TRANSMEMBRANE (PHOBIUS); TRANSMEMBRANE (PHOBIUS); IPR009040 (PROSITE_PROFILES); IPR009078 (SUPERFAMILY); TMhelix (TMHMM) |

|      |                                                                                                               |       |                                     |      |          |        |        |                                                                                                                                                                                                                                                                                                                                                                                                                                                                                                                                                                                                                                                                                                                                |
|------|---------------------------------------------------------------------------------------------------------------|-------|-------------------------------------|------|----------|--------|--------|--------------------------------------------------------------------------------------------------------------------------------------------------------------------------------------------------------------------------------------------------------------------------------------------------------------------------------------------------------------------------------------------------------------------------------------------------------------------------------------------------------------------------------------------------------------------------------------------------------------------------------------------------------------------------------------------------------------------------------|
| 2188 | c41101_g1_i2_len_4395_path_4831_0_355_5<br>186_356_1134_6981_1135_1136_4626__11<br>37_3528_1368_3529_3_1      | 15083 | ferritin 2 light chain homologue    | 1465 | 1.36E-32 | 54.20% | 0.470Y | IPR008331 (PFAM); IPR012347 (G3DSA:1.20.1260.GENE3D); PTHR11431:SF28 (PANTHER); IPR001519 (PANTHER); CYTOPLASMIC_DOMAIN (PHOBIUS); NON_CYTOPLASMIC_DOMAIN (PHOBIUS); NON_CYTOPLASMIC_DOMAIN (PHOBIUS); CYTOPLASMIC_DOMAIN (PHOBIUS); TRANSMEMBRANE (PHOBIUS); NON_CYTOPLASMIC_DOMAIN (PHOBIUS); CYTOPLASMIC_DOMAIN (PHOBIUS); NON_CYTOPLASMIC_DOMAIN (PHOBIUS); CYTOPLASMIC_DOMAIN (PHOBIUS); TRANSMEMBRANE (PHOBIUS); NON_CYTOPLASMIC_DOMAIN (PHOBIUS); TRANSMEMBRANE (PHOBIUS); TRANSMEMBRANE (PHOBIUS); TRANSMEMBRANE (PHOBIUS); CYTOPLASMIC_DOMAIN (PHOBIUS); TRANSMEMBRANE (PHOBIUS); TRANSMEMBRANE (PHOBIUS); TRANSMEMBRANE (PHOBIUS); IPR009040 (PROSITE_PROFILES); SignalP-noTM (SIGNALP_EUK); IPR009078 (SUPERFAMILY) |
| 2189 | c41104_g1_i1_len_9451_path_9778_0_3319_<br>13096_3320_3344_13121_3345_9450_1                                  | 4119  | low quality protein: hemocytin-like | 3150 | 4.86E-69 | 42.20% | 0.267  | IPR001846 (SMART); IPR001007 (SMART); PTHR11339 (PANTHER); IPR001007 (PROSITE_PATTERNS); IPR001007 (PROSITE_PATTERNS); PD968187 (PRODOM); IPR006207 (PROSITE_PROFILES); IPR001846 (PROSITE_PROFILES); IPR001007 (PROSITE_PROFILES); IPR001007 (PROSITE_PROFILES); IPR001846 (PROSITE_PROFILES); IPR002919 (SUPERFAMILY); IPR002919 (SUPERFAMILY)                                                                                                                                                                                                                                                                                                                                                                               |
| 2190 | c41111_g2_i1_len_1336_path_1124_0_1121_<br>2246_1122_1239_18022_1240_1257_18022_<br>1258_1275_18022_1276_12_3 | 1906  | alpha-l-fucosidase                  | 446  | 7.26E-08 | 55.10% | 0.104  | TRANSMEMBRANE (PHOBIUS); CYTOPLASMIC_DOMAIN (PHOBIUS); NON_CYTOPLASMIC_DOMAIN (PHOBIUS); CYTOPLASMIC_DOMAIN (PHOBIUS); TRANSMEMBRANE (PHOBIUS); TMhelix (TMHMM); TMhelix (TMHMM)                                                                                                                                                                                                                                                                                                                                                                                                                                                                                                                                               |
| 2191 | c41111_g2_i1_len_1336_path_1124_0_1121_<br>2246_1122_1239_18022_1240_1257_18022_<br>1258_1275_18022_1276_12_4 | 1906  | hypothetical protein                | 445  | 2.73E-08 | 51.25% | 0.107  | NON_CYTOPLASMIC_DOMAIN (PHOBIUS); TRANSMEMBRANE (PHOBIUS); CYTOPLASMIC_DOMAIN (PHOBIUS); NON_CYTOPLASMIC_DOMAIN (PHOBIUS); TRANSMEMBRANE (PHOBIUS); TRANSMEMBRANE (PHOBIUS); CYTOPLASMIC_DOMAIN (PHOBIUS); TMhelix (TMHMM)                                                                                                                                                                                                                                                                                                                                                                                                                                                                                                     |
| 2192 | c41111_g2_i2_len_1318_path_1124_0_1121_<br>2246_1122_1239_18022_1240_1257_18022_<br>1258_1275_18038_1276_12_3 | 1922  | ---NA---                            | 440  |          |        | 0.105  | TRANSMEMBRANE (PHOBIUS); CYTOPLASMIC_DOMAIN (PHOBIUS); NON_CYTOPLASMIC_DOMAIN (PHOBIUS); TRANSMEMBRANE (PHOBIUS); CYTOPLASMIC_DOMAIN (PHOBIUS); TMhelix (TMHMM); TMhelix (TMHMM)                                                                                                                                                                                                                                                                                                                                                                                                                                                                                                                                               |
| 2193 | c41111_g2_i2_len_1318_path_1124_0_1121_<br>2246_1122_1239_18022_1240_1257_18022_<br>1258_1275_18038_1276_12_4 | 1922  | hypothetical protein                | 439  | 1.25E-06 | 54.00% | 0.105  | CYTOPLASMIC_DOMAIN (PHOBIUS); TRANSMEMBRANE (PHOBIUS); NON_CYTOPLASMIC_DOMAIN (PHOBIUS); NON_CYTOPLASMIC_DOMAIN (PHOBIUS); TRANSMEMBRANE (PHOBIUS); TRANSMEMBRANE (PHOBIUS); CYTOPLASMIC_DOMAIN (PHOBIUS); TMhelix (TMHMM)                                                                                                                                                                                                                                                                                                                                                                                                                                                                                                     |
| 2194 | c41113_g1_i1_len_5501_path_5479_0_1972_<br>7452_1973_1984_7464_1985_3143_8623_3<br>144_3146_8626_3147_32_1    | 4943  | vitellogenin 2                      | 1834 | 0        | 44.90% | 0.138  | IPR001747 (SMART); IPR001846 (SMART); IPR015816 (G3DSA:2.30.230.GENE3D); IPR001846 (PFAM); IPR001747 (PFAM); IPR015255 (PFAM); IPR011030 (G3DSA:1.25.10.GENE3D); PTHR23345:SF1 (PANTHER); PTHR23345 (PANTHER); NON_CYTOPLASMIC_DOMAIN (PHOBIUS); CYTOPLASMIC_DOMAIN (PHOBIUS); TRANSMEMBRANE (PHOBIUS); TRANSMEMBRANE (PHOBIUS); IPR001846 (PROSITE_PROFILES); IPR001747 (PROSITE_PROFILES); IPR011030 (SUPERFAMILY); IPR015819 (SUPERFAMILY); IPR015819 (SUPERFAMILY); TMhelix (TMHMM); TMhelix (TMHMM)                                                                                                                                                                                                                       |
| 2195 | c41113_g1_i2_len_5285_path_5479_0_1972_<br>7452_1973_1984_7464_1985_3143_8623_3<br>144_3146_8626_3147_32_1    | 3335  | vitellogenin 2                      | 1762 | 0        | 44.90% | 0.138  | IPR001846 (SMART); IPR001747 (SMART); IPR015816 (G3DSA:2.30.230.GENE3D); IPR015255 (PFAM); IPR001747 (PFAM); IPR001846 (PFAM); IPR011030 (G3DSA:1.25.10.GENE3D); PTHR23345 (PANTHER); PTHR23345:SF1 (PANTHER); IPR001846 (PROSITE_PROFILES); IPR001747 (PROSITE_PROFILES); IPR011030 (SUPERFAMILY); IPR015819 (SUPERFAMILY); IPR015819 (SUPERFAMILY)                                                                                                                                                                                                                                                                                                                                                                           |



|  |                                                                                                            |      |                                                  |      |   |        |       |                                                                                                                                                                                                                                                                                                                                                                                                                                                                                                                                                                                                                                                                                                                                                                                                                                                                                                                                                                                                                                                                                                                                                                                                                                                                                                                                                                                                                                                                                                                                                                                                                                                                                                                                      |
|--|------------------------------------------------------------------------------------------------------------|------|--------------------------------------------------|------|---|--------|-------|--------------------------------------------------------------------------------------------------------------------------------------------------------------------------------------------------------------------------------------------------------------------------------------------------------------------------------------------------------------------------------------------------------------------------------------------------------------------------------------------------------------------------------------------------------------------------------------------------------------------------------------------------------------------------------------------------------------------------------------------------------------------------------------------------------------------------------------------------------------------------------------------------------------------------------------------------------------------------------------------------------------------------------------------------------------------------------------------------------------------------------------------------------------------------------------------------------------------------------------------------------------------------------------------------------------------------------------------------------------------------------------------------------------------------------------------------------------------------------------------------------------------------------------------------------------------------------------------------------------------------------------------------------------------------------------------------------------------------------------|
|  | c41124_g3_i1_len_9227_path_30602_0_2144<br>_10445_2145_2258_10559_2259_4373_126<br>74_4374_4386_12687_43_0 | 5328 | myosin light chain smooth muscle                 | 3076 | 0 | 58.50% | 0.114 | Coil (COILS); IPR003599 (SMART); IPR002290 (SMART); IPR003961 (SMART);<br>IPR003598 (SMART); IPR013106 (SMART); G3DSA:1.10.510.10 (GENE3D);<br>IPR013783 (G3DSA:2.60.40.GENE3D); IPR013098 (PFAM); IPR013783<br>(G3DSA:2.60.40.GENE3D); IPR013783 (G3DSA:2.60.40.GENE3D); IPR013783<br>(G3DSA:2.60.40.GENE3D); IPR013783 (G3DSA:2.60.40.GENE3D); IPR013783<br>(G3DSA:2.60.40.GENE3D); IPR013783 (G3DSA:2.60.40.GENE3D); IPR013783<br>(G3DSA:2.60.40.GENE3D); G3DSA:3.30.200.20 (GENE3D); IPR000719 (PFAM);<br>IPR003961 (PFAM); IPR020675 (PANTHER); PTHR22964:SF56 (PANTHER);<br>IPR008271 (PROSITE_PATTERNS); IPR017441 (PROSITE_PATTERNS);<br>TRANSMEMBRANE (PHOBIUS); NON_CYTOPLASMIC_DOMAIN (PHOBIUS);<br>NON_CYTOPLASMIC_DOMAIN (PHOBIUS); CYTOPLASMIC_DOMAIN<br>(PHOBIUS); TRANSMEMBRANE (PHOBIUS); IPR007110 (PROSITE_PROFILES);<br>IPR007110 (PROSITE_PROFILES); IPR007110 (PROSITE_PROFILES);<br>IPR007110 (PROSITE_PROFILES); IPR007110 (PROSITE_PROFILES);<br>IPR007110 (PROSITE_PROFILES); IPR007110 (PROSITE_PROFILES);<br>IPR003961 (PROSITE_PROFILES); IPR007110 (PROSITE_PROFILES);<br>IPR003961 (PROSITE_PROFILES); IPR000719 (PROSITE_PROFILES);<br>IPR007110 (PROSITE_PROFILES); SSF48726 (SUPERFAMILY); SSF48726<br>(SUPERFAMILY); SSF48726 (SUPERFAMILY); SSF48726 (SUPERFAMILY);<br>SSF48726 (SUPERFAMILY); SSF48726 (SUPERFAMILY); SSF48726<br>(SUPERFAMILY); IPR003961 (SUPERFAMILY); SSF48726 (SUPERFAMILY);<br>SSF48726 (SUPERFAMILY); SSF48726 (SUPERFAMILY); SSF48726<br>(SUPERFAMILY); SSF48726 (SUPERFAMILY); IPR011009 (SUPERFAMILY);<br>SSF48726 (SUPERFAMILY); SSF48726 (SUPERFAMILY); TMhelix (TMHMM);<br>TMhelix (TMHMM)                                                                         |
|  | c41124_g3_i2_len_8912_path_30602_0_2144<br>_10559_2145_4259_12674_4260_4272_126<br>87_4273_4296_12711_42_0 | 5183 | muscle m-line assembly protein unc-89 isoform x2 | 2971 | 0 | 57.30% | 0.114 | Coil (COILS); IPR003961 (SMART); IPR003598 (SMART); IPR002290 (SMART);<br>IPR013106 (SMART); IPR003599 (SMART); IPR013783<br>(G3DSA:2.60.40.GENE3D); IPR000719 (PFAM); IPR013783<br>(G3DSA:2.60.40.GENE3D); IPR013783 (G3DSA:2.60.40.GENE3D);<br>G3DSA:3.30.200.20 (GENE3D); IPR013783 (G3DSA:2.60.40.GENE3D);<br>IPR013783 (G3DSA:2.60.40.GENE3D); IPR013098 (PFAM); IPR003961 (PFAM);<br>IPR013783 (G3DSA:2.60.40.GENE3D); G3DSA:1.10.510.10 (GENE3D);<br>IPR013783 (G3DSA:2.60.40.GENE3D); IPR013783 (G3DSA:2.60.40.GENE3D);<br>IPR020675 (PANTHER); PTHR22964:SF56 (PANTHER); IPR008271<br>(PROSITE_PATTERNS); IPR017441 (PROSITE_PATTERNS);<br>NON_CYTOPLASMIC_DOMAIN (PHOBIUS); TRANSMEMBRANE (PHOBIUS);<br>NON_CYTOPLASMIC_DOMAIN (PHOBIUS); TRANSMEMBRANE (PHOBIUS);<br>CYTOPLASMIC_DOMAIN (PHOBIUS); IPR007110 (PROSITE_PROFILES);<br>IPR003961 (PROSITE_PROFILES); IPR007110 (PROSITE_PROFILES);<br>IPR007110 (PROSITE_PROFILES); IPR007110 (PROSITE_PROFILES);<br>IPR007110 (PROSITE_PROFILES); IPR003961 (PROSITE_PROFILES);<br>IPR007110 (PROSITE_PROFILES); IPR007110 (PROSITE_PROFILES);<br>IPR007110 (PROSITE_PROFILES); IPR007110 (PROSITE_PROFILES);<br>IPR007110 (PROSITE_PROFILES); IPR007110 (PROSITE_PROFILES);<br>IPR007110 (PROSITE_PROFILES); IPR000719 (PROSITE_PROFILES);<br>SSF48726 (SUPERFAMILY); SSF48726 (SUPERFAMILY); SSF48726<br>(SUPERFAMILY); SSF48726 (SUPERFAMILY); IPR011009 (SUPERFAMILY);<br>SSF48726 (SUPERFAMILY); IPR003961 (SUPERFAMILY); SSF48726<br>(SUPERFAMILY); SSF48726 (SUPERFAMILY); SSF48726 (SUPERFAMILY);<br>SSF48726 (SUPERFAMILY); SSF48726 (SUPERFAMILY); SSF48726<br>(SUPERFAMILY); SSF48726 (SUPERFAMILY); SSF48726 (SUPERFAMILY);<br>TMhelix (TMHMM); TMhelix (TMHMM) |

|  |                                                                                                            |      |                                                  |      |   |        |       |                                                                                                                                                                                                                                                                                                                                                                                                                                                                                                                                                                                                                                                                                                                                                                                                                                                                                                                                                                                                                                                                                                                                                                                                                                                                                                                                                                                                                                                                                                                                                                                                                                                   |
|--|------------------------------------------------------------------------------------------------------------|------|--------------------------------------------------|------|---|--------|-------|---------------------------------------------------------------------------------------------------------------------------------------------------------------------------------------------------------------------------------------------------------------------------------------------------------------------------------------------------------------------------------------------------------------------------------------------------------------------------------------------------------------------------------------------------------------------------------------------------------------------------------------------------------------------------------------------------------------------------------------------------------------------------------------------------------------------------------------------------------------------------------------------------------------------------------------------------------------------------------------------------------------------------------------------------------------------------------------------------------------------------------------------------------------------------------------------------------------------------------------------------------------------------------------------------------------------------------------------------------------------------------------------------------------------------------------------------------------------------------------------------------------------------------------------------------------------------------------------------------------------------------------------------|
|  | c41124_g3_i3_len_8996_path_30602_0_2144<br>_10445_2145_2258_10559_2259_4373_126<br>74_4374_4386_12687_43_0 | 5245 | muscle m-line assembly protein unc-89 isoform x2 | 2999 | 0 | 56.30% | 0.114 | Coil (COILS); IPR003599 (SMART); IPR013106 (SMART); IPR003961 (SMART);<br>IPR003598 (SMART); IPR002290 (SMART); IPR013783<br>(G3DSA:2.60.40.GENE3D); G3DSA:1.10.510.10 (GENE3D); IPR013783<br>(G3DSA:2.60.40.GENE3D); IPR013783 (G3DSA:2.60.40.GENE3D); IPR013783<br>(G3DSA:2.60.40.GENE3D); IPR013783 (G3DSA:2.60.40.GENE3D); IPR003961<br>(PFAM); IPR000719 (PFAM); G3DSA:3.30.200.20 (GENE3D); IPR013783<br>(G3DSA:2.60.40.GENE3D); IPR013098 (PFAM); IPR013783<br>(G3DSA:2.60.40.GENE3D); IPR013783 (G3DSA:2.60.40.GENE3D); IPR020675<br>(PANTHER); PTHR22964:SF56 (PANTHER); IPR008271 (PROSITE_PATTERNS);<br>IPR017441 (PROSITE_PATTERNS); TRANSMEMBRANE (PHOBIUS);<br>CYTOPLASMIC_DOMAIN (PHOBIUS); NON_CYTOPLASMIC_DOMAIN<br>(PHOBIUS); TRANSMEMBRANE (PHOBIUS); NON_CYTOPLASMIC_DOMAIN<br>(PHOBIUS); IPR000719 (PROSITE_PROFILES); IPR007110<br>(PROSITE_PROFILES); IPR003961 (PROSITE_PROFILES); IPR007110<br>(PROSITE_PROFILES); IPR007110 (PROSITE_PROFILES); IPR007110<br>(PROSITE_PROFILES); IPR007110 (PROSITE_PROFILES); IPR007110<br>(PROSITE_PROFILES); IPR003961 (PROSITE_PROFILES); IPR007110<br>(PROSITE_PROFILES); IPR007110 (PROSITE_PROFILES); IPR007110<br>(PROSITE_PROFILES); IPR007110 (PROSITE_PROFILES); SSF48726<br>(SUPERFAMILY); SSF48726 (SUPERFAMILY); SSF48726 (SUPERFAMILY);<br>SSF48726 (SUPERFAMILY); SSF48726 (SUPERFAMILY); SSF48726<br>(SUPERFAMILY); SSF48726 (SUPERFAMILY); SSF48726 (SUPERFAMILY);<br>SSF48726 (SUPERFAMILY); SSF48726 (SUPERFAMILY); SSF48726<br>(SUPERFAMILY); SSF48726 (SUPERFAMILY); IPR003961 (SUPERFAMILY);<br>IPR011009 (SUPERFAMILY); SSF48726 (SUPERFAMILY); TMhelix (TMHMM) |
|  | c41124_g3_i4_len_9026_path_30602_0_2144<br>_10445_2145_2258_10559_2259_4373_126<br>74_4374_4386_12687_43_0 | 5346 | muscle m-line assembly protein unc-89 isoform x1 | 3009 | 0 | 56.50% | 0.114 | Coil (COILS); IPR003599 (SMART); IPR003961 (SMART); IPR013106 (SMART);<br>IPR003598 (SMART); IPR002290 (SMART); G3DSA:3.30.200.20 (GENE3D);<br>IPR013783 (G3DSA:2.60.40.GENE3D); IPR003961 (PFAM); IPR000719 (PFAM);<br>IPR013098 (PFAM); IPR013783 (G3DSA:2.60.40.GENE3D); IPR013783<br>(G3DSA:2.60.40.GENE3D); IPR013783 (G3DSA:2.60.40.GENE3D); IPR013783<br>(G3DSA:2.60.40.GENE3D); IPR013783 (G3DSA:2.60.40.GENE3D); IPR013783<br>(G3DSA:2.60.40.GENE3D); G3DSA:1.10.510.10 (GENE3D); IPR013783<br>(G3DSA:2.60.40.GENE3D); IPR020675 (PANTHER); PTHR22964:SF56<br>(PANTHER); IPR017441 (PROSITE_PATTERNS); IPR008271<br>(PROSITE_PATTERNS); TRANSMEMBRANE (PHOBIUS);<br>CYTOPLASMIC_DOMAIN (PHOBIUS); NON_CYTOPLASMIC_DOMAIN<br>(PHOBIUS); TRANSMEMBRANE (PHOBIUS); NON_CYTOPLASMIC_DOMAIN<br>(PHOBIUS); IPR007110 (PROSITE_PROFILES); IPR000719<br>(PROSITE_PROFILES); IPR007110 (PROSITE_PROFILES); IPR007110<br>(PROSITE_PROFILES); IPR007110 (PROSITE_PROFILES); IPR007110<br>(PROSITE_PROFILES); IPR007110 (PROSITE_PROFILES); IPR007110<br>(PROSITE_PROFILES); IPR003961 (PROSITE_PROFILES); IPR007110<br>(PROSITE_PROFILES); IPR007110 (PROSITE_PROFILES); IPR003961<br>(PROSITE_PROFILES); IPR007110 (PROSITE_PROFILES); SSF48726<br>(SUPERFAMILY); SSF48726 (SUPERFAMILY); SSF48726 (SUPERFAMILY);<br>SSF48726 (SUPERFAMILY); SSF48726 (SUPERFAMILY); SSF48726<br>(SUPERFAMILY); IPR011009 (SUPERFAMILY); SSF48726 (SUPERFAMILY);<br>IPR003961 (SUPERFAMILY); SSF48726 (SUPERFAMILY); SSF48726<br>(SUPERFAMILY); SSF48726 (SUPERFAMILY); SSF48726 (SUPERFAMILY);<br>SSF48726 (SUPERFAMILY); SSF48726 (SUPERFAMILY); TMhelix (TMHMM) |

|  |                                                                                                      |      |                                                  |      |   |        |       |   |                                                                                                                                                                                                                                                                                                                                                                                                                                                                                                                                                                                                                                                                                                                                                                                                                                                                                                                                                                                                                                                                                                                                                                                                                                                                                                                                                                                                                                                                                                                                                                                |
|--|------------------------------------------------------------------------------------------------------|------|--------------------------------------------------|------|---|--------|-------|---|--------------------------------------------------------------------------------------------------------------------------------------------------------------------------------------------------------------------------------------------------------------------------------------------------------------------------------------------------------------------------------------------------------------------------------------------------------------------------------------------------------------------------------------------------------------------------------------------------------------------------------------------------------------------------------------------------------------------------------------------------------------------------------------------------------------------------------------------------------------------------------------------------------------------------------------------------------------------------------------------------------------------------------------------------------------------------------------------------------------------------------------------------------------------------------------------------------------------------------------------------------------------------------------------------------------------------------------------------------------------------------------------------------------------------------------------------------------------------------------------------------------------------------------------------------------------------------|
|  | c41124_g3_i5_len_9627_path_30602_0_2144_10445_2145_2258_10559_2259_4373_12674_4374_4386_12687_43_0   | 5214 | muscle m-line assembly protein unc-89 isoform x2 | 3209 | 0 | 56.00% | 0.114 |   | Coil (COILS); IPR002290 (SMART); IPR003599 (SMART); IPR013106 (SMART); IPR003961 (SMART); IPR003598 (SMART); IPR013783 (G3DSA:2.60.40.GENE3D); IPR013783 (G3DSA:2.60.40.GENE3D); IPR000719 (PFAM); IPR013098 (PFAM); G3DSA:1.10.510.10 (GENE3D); IPR013783 (G3DSA:2.60.40.GENE3D); PTHR22964:SF56 (PANTHER); IPR020675 (PANTHER); IPR017441 (PROSITE_PATTERNS); IPR008271 (PROSITE_PATTERNS); NON_CYTOPLASMIC_DOMAIN (PHOBIUS); NON_CYTOPLASMIC_DOMAIN (PHOBIUS); TRANSMEMBRANE (PHOBIUS); CYTOPLASMIC_DOMAIN (PHOBIUS); TRANSMEMBRANE (PHOBIUS); TRANSMEMBRANE (PHOBIUS); CYTOPLASMIC_DOMAIN (PHOBIUS); IPR007110 (PROSITE_PROFILES); IPR000719 (PROSITE_PROFILES); IPR007110 (PROSITE_PROFILES); IPR007110 (PROSITE_PROFILES); IPR003961 (PROSITE_PROFILES); IPR007110 (PROSITE_PROFILES); SSF48726 (SUPERFAMILY); SSF48726 (SUPERFAMILY); IPR003961 (SUPERFAMILY); SSF48726 (SUPERFAMILY); SSF48726 (SUPERFAMILY); SSF48726 (SUPERFAMILY); SSF48726 (SUPERFAMILY); SSF48726 (SUPERFAMILY); IPR011009 (SUPERFAMILY); SSF48726 (SUPERFAMILY); SSF48726 (SUPERFAMILY); SSF48726 (SUPERFAMILY); TMhelix (TMHMM); TMhelix (TMHMM); TMhelix (TMHMM) |
|  | c41126_g1_i1_len_6399_path_239_0_3382_3618_3383_5179_5413_5180_5180_5414_5181_5562_14950_5563_5771_0 | 3152 | protein mesh isoform x2                          | 2133 | 0 | 70.70% | 0.341 | Y | IPR005533 (SMART); IPR000436 (SMART); IPR001846 (SMART); IPR003886 (SMART); IPR005533 (PFAM); G3DSA:2.10.70.10 (GENE3D); IPR001846 (PFAM); IPR013783 (G3DSA:2.60.40.GENE3D); IPR000436 (PFAM); IPR003886 (PFAM); IPR002909 (PFAM); PTHR13802:SF41 (PANTHER); PTHR13802 (PANTHER); TRANSMEMBRANE (PHOBIUS); CYTOPLASMIC_DOMAIN (PHOBIUS); TRANSMEMBRANE (PHOBIUS); CYTOPLASMIC_DOMAIN (PHOBIUS); TRANSMEMBRANE (PHOBIUS); NON_CYTOPLASMIC_DOMAIN (PHOBIUS); CYTOPLASMIC_DOMAIN (PHOBIUS); TRANSMEMBRANE (PHOBIUS); TRANSMEMBRANE (PHOBIUS); NON_CYTOPLASMIC_DOMAIN (PHOBIUS); TRANSMEMBRANE (PHOBIUS); NON_CYTOPLASMIC_DOMAIN (PHOBIUS); NON_CYTOPLASMIC_DOMAIN (PHOBIUS); IPR005533 (PROSITE_PROFILES); IPR000436 (PROSITE_PROFILES); IPR001846 (PROSITE_PROFILES); IPR000436 (SUPERFAMILY); IPR014756 (SUPERFAMILY); TMhelix (TMHMM); TMhelix (TMHMM); TMhelix (TMHMM)                                                                                                                                                                                                                                                                                                                                                                                                                                                                                                                                                                                                                                                                                                        |
|  | c41126_g1_i2_len_3770_path_239_0_3382_13629_3383_3769_0                                              | 1335 | protein mesh isoform x1                          | 1257 | 0 | 69.70% | 0.341 | Y | IPR001846 (SMART); IPR000436 (SMART); IPR005533 (SMART); IPR003886 (SMART); IPR001846 (PFAM); IPR005533 (PFAM); G3DSA:2.10.70.10 (GENE3D); IPR013783 (G3DSA:2.60.40.GENE3D); IPR002909 (PFAM); IPR000436 (PFAM); IPR003886 (PFAM); PTHR13802:SF41 (PANTHER); PTHR13802 (PANTHER); CYTOPLASMIC_DOMAIN (PHOBIUS); TRANSMEMBRANE (PHOBIUS); CYTOPLASMIC_DOMAIN (PHOBIUS); TRANSMEMBRANE (PHOBIUS); NON_CYTOPLASMIC_DOMAIN (PHOBIUS); IPR000436 (PROSITE_PROFILES); IPR005533 (PROSITE_PROFILES); IPR001846 (PROSITE_PROFILES); IPR003886 (PROSITE_PROFILES); IPR014756 (SUPERFAMILY); IPR000436 (SUPERFAMILY); TMhelix (TMHMM)                                                                                                                                                                                                                                                                                                                                                                                                                                                                                                                                                                                                                                                                                                                                                                                                                                                                                                                                                    |

[illegible]

|      |                                                                                                               |      |                              |      |           |        |       |                                                                                                                                                                                                                                                                                                                                                                                                                                                                                                                                                                                                                                                                                                                                                                                                                                                                                                                                                                                                                                                                                                                                                                                                                                                                                                                                                                  |
|------|---------------------------------------------------------------------------------------------------------------|------|------------------------------|------|-----------|--------|-------|------------------------------------------------------------------------------------------------------------------------------------------------------------------------------------------------------------------------------------------------------------------------------------------------------------------------------------------------------------------------------------------------------------------------------------------------------------------------------------------------------------------------------------------------------------------------------------------------------------------------------------------------------------------------------------------------------------------------------------------------------------------------------------------------------------------------------------------------------------------------------------------------------------------------------------------------------------------------------------------------------------------------------------------------------------------------------------------------------------------------------------------------------------------------------------------------------------------------------------------------------------------------------------------------------------------------------------------------------------------|
| 2205 | c41130_g1_i6_len_6103_path_6838_0_705_1<br>3048_706_802_22_803_928_14222_929_929<br>_14223_930_931_13146_93_1 | 3105 | lim domain-binding protein 3 | 2034 | 4.62E-104 | 70.00% | 0.144 | IPR006643 (SMART); IPR001781 (SMART); IPR001478 (SMART); IPR001478 (G3DSA:2.30.42.GENE3D); IPR001781 (PFAM); IPR001781 (G3DSA:2.10.110.GENE3D); IPR001781 (G3DSA:2.10.110.GENE3D); IPR001781 (G3DSA:2.10.110.GENE3D); IPR001478 (PFAM); PTHR24214 (PANTHER); PTHR24214:SF29 (PANTHER); IPR001781 (PROSITE_PATTERNS); IPR001781 (PROSITE_PATTERNS); NON_CYTOPLASMIC_DOMAIN (PHOBIUS); TRANSMEMBRANE (PHOBIUS); TRANSMEMBRANE (PHOBIUS); TRANSMEMBRANE (PHOBIUS); NON_CYTOPLASMIC_DOMAIN (PHOBIUS); TRANSMEMBRANE (PHOBIUS); NON_CYTOPLASMIC_DOMAIN (PHOBIUS); CYTOPLASMIC_DOMAIN (PHOBIUS); CYTOPLASMIC_DOMAIN (PHOBIUS); NON_CYTOPLASMIC_DOMAIN (PHOBIUS); TRANSMEMBRANE (PHOBIUS); TRANSMEMBRANE (PHOBIUS); NON_CYTOPLASMIC_DOMAIN (PHOBIUS); CYTOPLASMIC_DOMAIN (PHOBIUS); CYTOPLASMIC_DOMAIN (PHOBIUS); NON_CYTOPLASMIC_DOMAIN (PHOBIUS); TRANSMEMBRANE (PHOBIUS); TRANSMEMBRANE (PHOBIUS); CYTOPLASMIC_DOMAIN (PHOBIUS); CYTOPLASMIC_DOMAIN (PHOBIUS); TRANSMEMBRANE (PHOBIUS); NON_CYTOPLASMIC_DOMAIN (PHOBIUS); IPR001781 (PROSITE_PROFILES); IPR001478 (PROSITE_PROFILES); IPR001781 (PROSITE_PROFILES); SSF57716 (SUPERFAMILY); SSF57716 (SUPERFAMILY); SSF57716 (SUPERFAMILY); TMhelix (TMHMM); TMhelix (TMHMM) |
| 2206 | c41130_g1_i7_len_5770_path_6838_0_705_7<br>544_706_866_14223_867_868_7706_869_10<br>10_7848_1011_1161_596_1_1 | 3249 | lim domain-binding protein 3 | 1923 | 5.52E-103 | 74.50% | 0.144 | IPR001478 (SMART); IPR006643 (SMART); IPR001781 (SMART); IPR001478 (PFAM); IPR001781 (G3DSA:2.10.110.GENE3D); IPR001781 (G3DSA:2.10.110.GENE3D); IPR001781 (PFAM); IPR001781 (G3DSA:2.10.110.GENE3D); IPR001478 (G3DSA:2.30.42.GENE3D); PTHR24214 (PANTHER); PTHR24214:SF29 (PANTHER); IPR001781 (PROSITE_PATTERNS); IPR001781 (PROSITE_PATTERNS); NON_CYTOPLASMIC_DOMAIN (PHOBIUS); CYTOPLASMIC_DOMAIN (PHOBIUS); TRANSMEMBRANE (PHOBIUS); NON_CYTOPLASMIC_DOMAIN (PHOBIUS); CYTOPLASMIC_DOMAIN (PHOBIUS); CYTOPLASMIC_DOMAIN (PHOBIUS); TRANSMEMBRANE (PHOBIUS); NON_CYTOPLASMIC_DOMAIN (PHOBIUS); TRANSMEMBRANE (PHOBIUS); NON_CYTOPLASMIC_DOMAIN (PHOBIUS); TRANSMEMBRANE (PHOBIUS); CYTOPLASMIC_DOMAIN (PHOBIUS); TRANSMEMBRANE (PHOBIUS); TRANSMEMBRANE (PHOBIUS); NON_CYTOPLASMIC_DOMAIN (PHOBIUS); TRANSMEMBRANE (PHOBIUS); NON_CYTOPLASMIC_DOMAIN (PHOBIUS); CYTOPLASMIC_DOMAIN (PHOBIUS); TRANSMEMBRANE (PHOBIUS); CYTOPLASMIC_DOMAIN (PHOBIUS); IPR001478 (PROSITE_PROFILES); IPR001781 (PROSITE_PROFILES); IPR001781 (PROSITE_PROFILES); SSF57716 (SUPERFAMILY); SSF57716 (SUPERFAMILY); IPR001478 (SUPERFAMILY); TMhelix (TMHMM); TMhelix (TMHMM)                                                           |



|  |                                                                                                               |      |                              |      |           |        |       |                                                                                                                                                                                                                                                                                                                                                                                                                                                                                                                                                                                                                                                                                                                                                                                                                                                                                                                                                                                                                                                                                                                                                                                                                                                                                                      |
|--|---------------------------------------------------------------------------------------------------------------|------|------------------------------|------|-----------|--------|-------|------------------------------------------------------------------------------------------------------------------------------------------------------------------------------------------------------------------------------------------------------------------------------------------------------------------------------------------------------------------------------------------------------------------------------------------------------------------------------------------------------------------------------------------------------------------------------------------------------------------------------------------------------------------------------------------------------------------------------------------------------------------------------------------------------------------------------------------------------------------------------------------------------------------------------------------------------------------------------------------------------------------------------------------------------------------------------------------------------------------------------------------------------------------------------------------------------------------------------------------------------------------------------------------------------|
|  | c41130_g1_i8_len_5842_path_6838_0_705_7<br>544_706_866_14223_867_868_7706_869_10<br>10_7848_1011_1161_596_1_1 | 3220 | lim domain-binding protein 3 | 1947 | 6.23E-103 | 74.50% | 0.144 | IPR006643 (SMART); IPR001478 (SMART); IPR001781 (SMART); IPR001478 (G3DSA:2.30.42.GENE3D); IPR001781 (G3DSA:2.10.110.GENE3D); IPR001781 (G3DSA:2.10.110.GENE3D); IPR001781 (G3DSA:2.10.110.GENE3D); IPR001478 (PFAM); IPR001781 (PFAM); PTHR24214:SF29 (PANTHER); PTHR24214 (PANTHER); IPR001781 (PROSITE_PATTERNS); IPR001781 (PROSITE_PATTERNS); NON_CYTOPLASMIC_DOMAIN (PHOBIUS); CYTOPLASMIC_DOMAIN (PHOBIUS); TRANSMEMBRANE (PHOBIUS); TRANSMEMBRANE (PHOBIUS); CYTOPLASMIC_DOMAIN (PHOBIUS); TRANSMEMBRANE (PHOBIUS); TRANSMEMBRANE (PHOBIUS); TRANSMEMBRANE (PHOBIUS); TRANSMEMBRANE (PHOBIUS); NON_CYTOPLASMIC_DOMAIN (PHOBIUS); CYTOPLASMIC_DOMAIN (PHOBIUS); CYTOPLASMIC_DOMAIN (PHOBIUS); NON_CYTOPLASMIC_DOMAIN (PHOBIUS); NON_CYTOPLASMIC_DOMAIN (PHOBIUS); TRANSMEMBRANE (PHOBIUS); NON_CYTOPLASMIC_DOMAIN (PHOBIUS); NON_CYTOPLASMIC_DOMAIN (PHOBIUS); TRANSMEMBRANE (PHOBIUS); TRANSMEMBRANE (PHOBIUS); CYTOPLASMIC_DOMAIN (PHOBIUS); TRANSMEMBRANE (PHOBIUS); TRANSMEMBRANE (PHOBIUS); IPR001781 (PROSITE_PROFILES); IPR001478 (PROSITE_PROFILES); SSF57716 (SUPERFAMILY); IPR001478 (SUPERFAMILY); SSF57716 (SUPERFAMILY); TMhelix (TMHMM); TMhelix (TMHMM) |
|  | c41130_g1_i9_len_5733_path_6838_0_705_7<br>544_706_866_14223_867_868_7706_869_10<br>10_7848_1011_1161_596_1_1 | 3002 | lim domain-binding protein 3 | 1911 | 2.94E-102 | 72.40% | 0.144 | IPR001781 (SMART); IPR001478 (SMART); IPR006643 (SMART); IPR001781 (G3DSA:2.10.110.GENE3D); IPR001478 (G3DSA:2.30.42.GENE3D); IPR001781 (G3DSA:2.10.110.GENE3D); IPR001781 (G3DSA:2.10.110.GENE3D); IPR001781 (PFAM); IPR001478 (PFAM); PTHR24214 (PANTHER); PTHR24214:SF29 (PANTHER); IPR001781 (PROSITE_PATTERNS); IPR001781 (PROSITE_PATTERNS); NON_CYTOPLASMIC_DOMAIN (PHOBIUS); NON_CYTOPLASMIC_DOMAIN (PHOBIUS); TRANSMEMBRANE (PHOBIUS); TRANSMEMBRANE (PHOBIUS); CYTOPLASMIC_DOMAIN (PHOBIUS); CYTOPLASMIC_DOMAIN (PHOBIUS); TRANSMEMBRANE (PHOBIUS); NON_CYTOPLASMIC_DOMAIN (PHOBIUS); TRANSMEMBRANE (PHOBIUS); NON_CYTOPLASMIC_DOMAIN (PHOBIUS); CYTOPLASMIC_DOMAIN (PHOBIUS); NON_CYTOPLASMIC_DOMAIN (PHOBIUS); CYTOPLASMIC_DOMAIN (PHOBIUS); TRANSMEMBRANE (PHOBIUS); TRANSMEMBRANE (PHOBIUS); IPR001781 (PROSITE_PROFILES); IPR001781 (PROSITE_PROFILES); IPR001781 (PROSITE_PROFILES); IPR001478 (PROSITE_PROFILES); IPR001478 (SUPERFAMILY); SSF57716 (SUPERFAMILY); SSF57716 (SUPERFAMILY); TMhelix (TMHMM); TMhelix (TMHMM); TMhelix (TMHMM); TMhelix (TMHMM)                                                                                                                                                                                                                       |
|  | c41135_g1_i1_len_555_path_32257_0_2_753<br>55_3_8_75361_9_15_75368_16_20_75373_2<br>1_25_75378_26_30_75388_0  | 25   | ---NA---                     | 185  |           |        | 0.1   | no IPS match                                                                                                                                                                                                                                                                                                                                                                                                                                                                                                                                                                                                                                                                                                                                                                                                                                                                                                                                                                                                                                                                                                                                                                                                                                                                                         |

[illegible]

[illegible]



|      |                                                                                                               |      |             |                                           |      |          |        |       |                                                                                                                                                                                                                                                                                                                                                                                                                                                                                                                                                                                                                                                                                                                                                                                                                                                                                                    |
|------|---------------------------------------------------------------------------------------------------------------|------|-------------|-------------------------------------------|------|----------|--------|-------|----------------------------------------------------------------------------------------------------------------------------------------------------------------------------------------------------------------------------------------------------------------------------------------------------------------------------------------------------------------------------------------------------------------------------------------------------------------------------------------------------------------------------------------------------------------------------------------------------------------------------------------------------------------------------------------------------------------------------------------------------------------------------------------------------------------------------------------------------------------------------------------------------|
| 2229 | c41222_g1_i3_len_8758_path_9512_0_189_9<br>701_190_211_411_212_285_9796_286_759_<br>_10268__760_1368_6_5      | 6095 |             | centromeric protein                       | 2919 | 0        | 56.00% | 0.102 | Coil (COILS); Coil (COILS); Coil (COILS); Coil (COILS); Coil (COILS); Coil (COILS);<br>Coil (COILS); Coil (COILS); Coil (COILS); Coil (COILS); Coil (COILS); Coil (COILS);<br>Coil (COILS); Coil (COILS); Coil (COILS); Coil (COILS); Coil (COILS); Coil (COILS);<br>Coil (COILS); Coil (COILS); Coil (COILS); Coil (COILS); Coil (COILS); Coil (COILS);<br>Coil (COILS); IPR027881 (PFAM); CYTOPLASMIC_DOMAIN (PHOBIUS); TRANSMEMBRANE (PHOBIUS); NON_CYTOPLASMIC_DOMAIN (PHOBIUS)                                                                                                                                                                                                                                                                                                                                                                                                                |
| 2230 | c41222_g1_i4_len_8614_path_9512_0_189_9<br>701_190_211_411_212_285_9796_286_759_<br>_10268__760_1368_6_5      | 5952 |             | centromeric protein                       | 2871 | 0        | 56.20% | 0.102 | Coil (COILS); Coil (COILS); Coil (COILS); Coil (COILS); Coil (COILS); Coil (COILS);<br>Coil (COILS); Coil (COILS); Coil (COILS); Coil (COILS); Coil (COILS); Coil (COILS);<br>Coil (COILS); Coil (COILS); Coil (COILS); Coil (COILS); Coil (COILS); Coil (COILS);<br>Coil (COILS); Coil (COILS); Coil (COILS); Coil (COILS); Coil (COILS); Coil (COILS);<br>IPR027881 (PFAM); TRANSMEMBRANE (PHOBIUS); CYTOPLASMIC_DOMAIN (PHOBIUS); NON_CYTOPLASMIC_DOMAIN (PHOBIUS)                                                                                                                                                                                                                                                                                                                                                                                                                              |
| 2231 | c41222_g1_i5_len_8755_path_9512_0_189_9<br>701_190_211_411_212_285_9796_286_759_<br>_10268__760_1368_63_5     | 6143 |             | centromeric protein                       | 2918 | 0        | 56.20% | 0.102 | Coil (COILS); Coil (COILS); Coil (COILS); Coil (COILS); Coil (COILS); Coil (COILS);<br>Coil (COILS); Coil (COILS); Coil (COILS); Coil (COILS); Coil (COILS); Coil (COILS);<br>Coil (COILS); Coil (COILS); Coil (COILS); Coil (COILS); Coil (COILS); Coil (COILS);<br>Coil (COILS); Coil (COILS); Coil (COILS); Coil (COILS); Coil (COILS); Coil (COILS);<br>IPR027881 (PFAM); TRANSMEMBRANE (PHOBIUS); NON_CYTOPLASMIC_DOMAIN (PHOBIUS); CYTOPLASMIC_DOMAIN (PHOBIUS)                                                                                                                                                                                                                                                                                                                                                                                                                              |
| 2232 | c41231_g1_i1_len_1461_path_781_0_461_12<br>43_462_550_4219_551_575_4244_576_609_<br>4013_610_636_4040_637_8_3 | 315  | tlf5a_tactr | ame: full=techylectin-5a flags: precursor | 487  | 2.44E-63 | 63.80% | 0.127 | IPR002181 (SMART); IPR014716 (G3DSA:3.90.215.GENE3D); IPR014715 (G3DSA:4.10.530.GENE3D); IPR002181 (PFAM); PTHR19143 (PANTHER); IPR020837 (PROSITE_PATTERNS); NON_CYTOPLASMIC_DOMAIN (PHOBIUS); TRANSMEMBRANE (PHOBIUS); CYTOPLASMIC_DOMAIN (PHOBIUS); IPR002181 (PROSITE_PROFILES); IPR002181 (SUPERFAMILY); TMhelix (TMHMM)                                                                                                                                                                                                                                                                                                                                                                                                                                                                                                                                                                      |
| 2233 | c41231_g1_i3_len_2404_path_8813_0_75_14<br>658_76_162_8972_163_194_9003_195_198_<br>8262_199_1188_1243_1189_3 | 519  | tlf5a_tactr | ame: full=techylectin-5a flags: precursor | 802  | 7.31E-63 | 62.90% | 0.127 | IPR002181 (SMART); IPR002181 (PFAM); IPR014716 (G3DSA:3.90.215.GENE3D); IPR014715 (G3DSA:4.10.530.GENE3D); PTHR19143 (PANTHER); IPR020837 (PROSITE_PATTERNS); TRANSMEMBRANE (PHOBIUS); NON_CYTOPLASMIC_DOMAIN (PHOBIUS); CYTOPLASMIC_DOMAIN (PHOBIUS); TRANSMEMBRANE (PHOBIUS); NON_CYTOPLASMIC_DOMAIN (PHOBIUS); CYTOPLASMIC_DOMAIN (PHOBIUS); TRANSMEMBRANE (PHOBIUS); IPR002181 (PROSITE_PROFILES); IPR002181 (SUPERFAMILY); TMhelix (TMHMM)                                                                                                                                                                                                                                                                                                                                                                                                                                                    |
| 2234 | c41231_g1_i4_len_2191_path_8813_0_75_14<br>658_76_162_8972_163_194_9003_195_198_<br>8262_199_1188_1243_1189_3 | 535  | tlf5a_tactr | ame: full=techylectin-5a flags: precursor | 731  | 5.23E-63 | 63.20% | 0.127 | IPR002181 (SMART); IPR014716 (G3DSA:3.90.215.GENE3D); IPR002181 (PFAM); IPR014715 (G3DSA:4.10.530.GENE3D); PTHR19143 (PANTHER); IPR020837 (PROSITE_PATTERNS); TRANSMEMBRANE (PHOBIUS); CYTOPLASMIC_DOMAIN (PHOBIUS); TRANSMEMBRANE (PHOBIUS); NON_CYTOPLASMIC_DOMAIN (PHOBIUS); NON_CYTOPLASMIC_DOMAIN (PHOBIUS); CYTOPLASMIC_DOMAIN (PHOBIUS); TRANSMEMBRANE (PHOBIUS); IPR002181 (PROSITE_PROFILES); IPR002181 (SUPERFAMILY); TMhelix (TMHMM)                                                                                                                                                                                                                                                                                                                                                                                                                                                    |
| 2235 | c41238_g4_i1_len_3372_path_10962_0_316_<br>11279_317_2875_13904_2876_3218_6186_<br>1_3219_3371_5              | 3521 |             | low quality protein: titin-like           | 1124 | 0        | 72.20% | 0.166 | Coil (COILS); IPR003599 (SMART); IPR003598 (SMART); IPR013783 (G3DSA:2.60.40.GENE3D); IPR013098 (PFAM); IPR013783 (G3DSA:2.60.40.GENE3D); IPR013783 (G3DSA:2.60.40.GENE3D); IPR013783 (G3DSA:2.60.40.GENE3D); PTHR19897 (PANTHER); PTHR19897:SF149 (PANTHER); NON_CYTOPLASMIC_DOMAIN (PHOBIUS); CYTOPLASMIC_DOMAIN (PHOBIUS); CYTOPLASMIC_DOMAIN (PHOBIUS); TRANSMEMBRANE (PHOBIUS); TRANSMEMBRANE (PHOBIUS); TRANSMEMBRANE (PHOBIUS); NON_CYTOPLASMIC_DOMAIN (PHOBIUS); CYTOPLASMIC_DOMAIN (PHOBIUS); CYTOPLASMIC_DOMAIN (PHOBIUS); NON_CYTOPLASMIC_DOMAIN (PHOBIUS); TRANSMEMBRANE (PHOBIUS); TRANSMEMBRANE (PHOBIUS); IPR007110 (PROSITE_PROFILES); IPR007110 (PROSITE_PROFILES); IPR007110 (PROSITE_PROFILES); IPR007110 (PROSITE_PROFILES); SSF48726 (SUPERFAMILY); SSF48726 (SUPERFAMILY); SSF48726 (SUPERFAMILY); SSF48726 (SUPERFAMILY); TMhelix (TMHMM); TMhelix (TMHMM); TMhelix (TMHMM) |



Supplementary Table 7

|      |                                                                                                               |     |                                                 |     |           |        |       |                                                                                                                                                                                                                                                                                                                                                                                                                                                                                                                  |
|------|---------------------------------------------------------------------------------------------------------------|-----|-------------------------------------------------|-----|-----------|--------|-------|------------------------------------------------------------------------------------------------------------------------------------------------------------------------------------------------------------------------------------------------------------------------------------------------------------------------------------------------------------------------------------------------------------------------------------------------------------------------------------------------------------------|
| 2240 | c41246_g5_i1_len_675_path_22060_0_13_22<br>074_14_17_22078_18_23_22084_24_25_220<br>86_26_29_22090_30_32_96_3 | 31  | zinc finger protein                             | 225 | 1.39E-17  | 55.90% | 0.1   | IPR015880 (SMART); IPR013087 (G3DSA:3.30.160.GENE3D); PF13465 (PFAM); IPR013087 (G3DSA:3.30.160.GENE3D); PTHR24409:SF14 (PANTHER); PTHR24409 (PANTHER); IPR007087 (PROSITE_PATTERNS); IPR007087 (PROSITE_PATTERNS); IPR007087 (PROSITE_PATTERNS); IPR007087 (PROSITE_PROFILES); IPR007087 (PROSITE_PROFILES); IPR007087 (PROSITE_PROFILES); SSF57667 (SUPERFAMILY); SSF57667 (SUPERFAMILY)                                                                                                                       |
| 2241 | c41246_g5_i2_len_639_path_22060_0_13_22<br>074_14_17_22078_18_23_22093_24_25_137<br>1_26_37_1383_38_45_1182_3 | 37  | zinc c2h2 type domain-containing protein        | 213 | 3.34E-16  | 54.50% | 0.101 | IPR015880 (SMART); IPR013087 (G3DSA:3.30.160.GENE3D); IPR013087 (G3DSA:3.30.160.GENE3D); PF13465 (PFAM); PTHR24409 (PANTHER); PTHR24409:SF14 (PANTHER); IPR007087 (PROSITE_PATTERNS); IPR007087 (PROSITE_PATTERNS); IPR007087 (PROSITE_PATTERNS); IPR007087 (PROSITE_PROFILES); IPR007087 (PROSITE_PROFILES); IPR007087 (PROSITE_PROFILES); SSF57667 (SUPERFAMILY); SSF57667 (SUPERFAMILY)                                                                                                                       |
| 2242 | c41251_g5_i9_len_1896_path_16911_0_72_1<br>6984_73_1823_8148_1824_1824_18735_182<br>5_1825_9152_1826_1837_1_1 | 665 | mitochondrial-processing peptidase subunit beta | 632 | 0         | 84.60% | 0.179 | IPR007863 (PFAM); IPR011237 (G3DSA:3.30.830.GENE3D); IPR011765 (PFAM); IPR011237 (G3DSA:3.30.830.GENE3D); PTHR11851:SF103 (PANTHER); PTHR11851 (PANTHER); IPR001431 (PROSITE_PATTERNS); SignalP-TM (SIGNALP_GRAM_POSITIVE); IPR011249 (SUPERFAMILY); IPR011249 (SUPERFAMILY)                                                                                                                                                                                                                                     |
| 2243 | c41267_g3_i1_len_1702_path_6274_0_306_6<br>581_307_1373_4136_1374_1397_4160_1398<br>1531_4294_1532_1557_33_2  | 390 | nucleolar protein 56                            | 567 | 0         | 87.50% | 0.25  | Coil (COILS); IPR012976 (SMART); IPR012974 (PFAM); IPR002687 (PFAM); IPR012976 (PFAM); PTHR10894:SF0 (PANTHER); PTHR10894 (PANTHER); IPR002687 (PROSITE_PROFILES); SSF89124 (SUPERFAMILY)                                                                                                                                                                                                                                                                                                                        |
| 2244 | c41269_g2_i1_len_1066_path_6263_0_935_2<br>706_936_1065_0                                                     | 441 | phospholipase a2-like                           | 356 | 1.42E-39  | 62.00% | 0.149 | IPR016090 (G3DSA:1.20.90.GENE3D); IPR001211 (PFAM); PTHR12253 (PANTHER); IPR013090 (PROSITE_PATTERNS); NON_CYTOPLASMIC_DOMAIN (PHOBIUS); CYTOPLASMIC_DOMAIN (PHOBIUS); TRANSMEMBRANE (PHOBIUS); IPR016090 (SUPERFAMILY)                                                                                                                                                                                                                                                                                          |
| 2245 | c41271_g1_i1_len_2199_path_5779_0_453_2<br>425_454_545_2517_546_606_6383_607_620<br>_2361_621_682_6458_683_0  | 188 | probable cytochrome p450 49a1                   | 733 | 7.30E-133 | 61.30% | 0.129 | IPR001128 (PRINTS); IPR002401 (PRINTS); IPR001128 (PFAM); IPR001128 (G3DSA:1.10.630.GENE3D); PTHR24305:SF49 (PANTHER); PTHR24305 (PANTHER); IPR017972 (PROSITE_PATTERNS); NON_CYTOPLASMIC_DOMAIN (PHOBIUS); NON_CYTOPLASMIC_DOMAIN (PHOBIUS); TRANSMEMBRANE (PHOBIUS); TRANSMEMBRANE (PHOBIUS); CYTOPLASMIC_DOMAIN (PHOBIUS); IPR001128 (SUPERFAMILY); TMhelix (TMHMM)                                                                                                                                           |
| 2246 | c41271_g1_i2_len_2224_path_5779_0_453_6<br>232_454_545_2517_546_606_2347_607_620<br>_2361_621_682_8193_683_0  | 260 | probable cytochrome p450 49a1-like              | 742 | 2.29E-137 | 61.30% | 0.129 | IPR001128 (PRINTS); IPR002401 (PRINTS); IPR001128 (G3DSA:1.10.630.GENE3D); IPR001128 (PFAM); PTHR24305:SF49 (PANTHER); PTHR24305 (PANTHER); IPR017972 (PROSITE_PATTERNS); CYTOPLASMIC_DOMAIN (PHOBIUS); NON_CYTOPLASMIC_DOMAIN (PHOBIUS); TRANSMEMBRANE (PHOBIUS); IPR001128 (SUPERFAMILY); TMhelix (TMHMM)                                                                                                                                                                                                      |
| 2247 | c41271_g1_i4_len_587_path_1006_0_221_12<br>28_222_262_7343_263_300_9411_301_311_<br>7389_312_351_2815_352_4_0 | 36  | cytochrome p450 partial                         | 196 | 2.01E-35  | 66.90% | 0.145 | IPR002401 (PRINTS); IPR001128 (PFAM); IPR001128 (G3DSA:1.10.630.GENE3D); PTHR24305 (PANTHER); PTHR24305:SF49 (PANTHER); IPR001128 (SUPERFAMILY)                                                                                                                                                                                                                                                                                                                                                                  |
| 2248 | c41272_g1_i1_len_967_path_7695_0_24_401<br>3_25_90_4079_91_130_4119_131_340_107<br>56_341_353_4339_354_3_4    | 159 | g-protein coupled receptor mth2 isoform x1      | 322 | 1.41E-41  | 57.50% | 0.159 | IPR000832 (PFAM); PTHR12011 (PANTHER); PTHR12011:SF164 (PANTHER); TRANSMEMBRANE (PHOBIUS); CYTOPLASMIC_DOMAIN (PHOBIUS); NON_CYTOPLASMIC_DOMAIN (PHOBIUS); CYTOPLASMIC_DOMAIN (PHOBIUS); TRANSMEMBRANE (PHOBIUS); TRANSMEMBRANE (PHOBIUS); NON_CYTOPLASMIC_DOMAIN (PHOBIUS); NON_CYTOPLASMIC_DOMAIN (PHOBIUS); CYTOPLASMIC_DOMAIN (PHOBIUS); TRANSMEMBRANE (PHOBIUS); TRANSMEMBRANE (PHOBIUS); IPR017981 (PROSITE_PROFILES); TMhelix (TMHMM); TMhelix (TMHMM); TMhelix (TMHMM); TMhelix (TMHMM); TMhelix (TMHMM) |

|      |                                                                                                               |     |                                                 |      |          |        |       |                                                                                                                                                                                                                                                                                                                                                                                                                                                                                                                                                                                                                                                                                                                                                                                                                                                                                                                                                                                                                                                                                           |
|------|---------------------------------------------------------------------------------------------------------------|-----|-------------------------------------------------|------|----------|--------|-------|-------------------------------------------------------------------------------------------------------------------------------------------------------------------------------------------------------------------------------------------------------------------------------------------------------------------------------------------------------------------------------------------------------------------------------------------------------------------------------------------------------------------------------------------------------------------------------------------------------------------------------------------------------------------------------------------------------------------------------------------------------------------------------------------------------------------------------------------------------------------------------------------------------------------------------------------------------------------------------------------------------------------------------------------------------------------------------------------|
| 2249 | c41272_g1_i2_len_3737_path_7695_0_24_40<br>13_25_90_4079_91_130_4119__131_340_10<br>756_341_353_4339_354_5    | 449 | g-protein coupled receptor mth2-like isoform x2 | 1245 | 2.22E-88 | 54.00% | 0.14  | IPR023311 (G3DSA:2.170.180.GENE3D); IPR000832 (PFAM); IPR010596 (PFAM); PTHR12011:SF164 (PANTHER); PTHR12011 (PANTHER); NON_CYTOPLASMIC_DOMAIN (PHOBIUS); CYTOPLASMIC_DOMAIN (PHOBIUS); TRANSMEMBRANE (PHOBIUS); TRANSMEMBRANE (PHOBIUS); NON_CYTOPLASMIC_DOMAIN (PHOBIUS); TRANSMEMBRANE (PHOBIUS); TRANSMEMBRANE (PHOBIUS); CYTOPLASMIC_DOMAIN (PHOBIUS); NON_CYTOPLASMIC_DOMAIN (PHOBIUS); NON_CYTOPLASMIC_DOMAIN (PHOBIUS); NON_CYTOPLASMIC_DOMAIN (PHOBIUS); CYTOPLASMIC_DOMAIN (PHOBIUS); CYTOPLASMIC_DOMAIN (PHOBIUS); CYTOPLASMIC_DOMAIN (PHOBIUS); TRANSMEMBRANE (PHOBIUS); TRANSMEMBRANE (PHOBIUS); TRANSMEMBRANE (PHOBIUS); TRANSMEMBRANE (PHOBIUS); TRANSMEMBRANE (PHOBIUS); TRANSMEMBRANE (PHOBIUS); IPR017981 (PROSITE_PROFILES); SSF63877 (SUPERFAMILY); SSF63877 (SUPERFAMILY); TMhelix (TMHMM); TMhelix (TMHMM); TMhelix (TMHMM); TMhelix (TMHMM); TMhelix (TMHMM); TMhelix (TMHMM);                                                                                                                                                                                     |
| 2250 | c41290_g1_i1_len_452_path_15739_0_85_32<br>694_86_109_17539_110_419_15538_420_42<br>7_8970_428_451_4          | 20  | enteropeptidase isoform 2 precursor             | 151  | 2.70E-32 | 64.60% | 0.126 | IPR001254 (SMART); G3DSA:2.40.10.10 (GENE3D); IPR001254 (PFAM); PTHR24256 (PANTHER); IPR018114 (PROSITE_PATTERNS); IPR001254 (PROSITE_PROFILES); IPR009003 (SUPERFAMILY)                                                                                                                                                                                                                                                                                                                                                                                                                                                                                                                                                                                                                                                                                                                                                                                                                                                                                                                  |
| 2251 | c41290_g2_i1_len_2407_path_1_0_1148_115<br>0_1149_1176_15278_1177_1411_1404_1412<br>_1435_1428_1436_1447_14_3 | 246 | urokinase-type plasminogen activator            | 803  | 6.12E-61 | 56.70% | 0.117 | IPR001314 (PRINTS); IPR002172 (SMART); IPR001254 (SMART); G3DSA:2.40.10.10 (GENE3D); G3DSA:2.40.10.10 (GENE3D); IPR002172 (PFAM); IPR002172 (G3DSA:4.10.400.GENE3D); G3DSA:2.40.10.10 (GENE3D); IPR001254 (PFAM); PTHR24265 (PANTHER); IPR018114 (PROSITE_PATTERNS); IPR018114 (PROSITE_PATTERNS); TRANSMEMBRANE (PHOBIUS); TRANSMEMBRANE (PHOBIUS); NON_CYTOPLASMIC_DOMAIN (PHOBIUS); CYTOPLASMIC_DOMAIN (PHOBIUS); TRANSMEMBRANE (PHOBIUS); NON_CYTOPLASMIC_DOMAIN (PHOBIUS); CYTOPLASMIC_DOMAIN (PHOBIUS); IPR001254 (PROSITE_PROFILES); IPR002172 (PROSITE_PROFILES); IPR009003 (SUPERFAMILY); IPR002172 (SUPERFAMILY); TMhelix (TMHMM)                                                                                                                                                                                                                                                                                                                                                                                                                                               |
| 2252 | c41290_g2_i2_len_2656_path_11643_0_358<br>12002_359_433_12076_434_459_8487_460<br>513_32463_514_1829_1347_4   | 212 | urokinase-type plasminogen activator            | 885  | 8.52E-57 | 55.10% | 0.108 | IPR001314 (PRINTS); IPR001254 (SMART); G3DSA:2.40.10.10 (GENE3D); G3DSA:2.40.10.10 (GENE3D); IPR001254 (PFAM); G3DSA:2.40.10.10 (GENE3D); PTHR24265 (PANTHER); IPR018114 (PROSITE_PATTERNS); IPR018114 (PROSITE_PATTERNS); IPR001254 (PROSITE_PROFILES); IPR009003 (SUPERFAMILY)                                                                                                                                                                                                                                                                                                                                                                                                                                                                                                                                                                                                                                                                                                                                                                                                          |
| 2253 | c41290_g2_i3_len_2285_path_1_0_1148_115<br>0_1149_1176_15278_1177_1411_1404_1412<br>_1435_1428_1436_1447_14_4 | 252 | urokinase-type plasminogen activator            | 762  | 1.68E-53 | 53.90% | 0.108 | IPR001314 (PRINTS); IPR001254 (SMART); IPR001254 (PFAM); G3DSA:2.40.10.10 (GENE3D); G3DSA:2.40.10.10 (GENE3D); G3DSA:2.40.10.10 (GENE3D); PTHR24265 (PANTHER); IPR018114 (PROSITE_PATTERNS); IPR018114 (PROSITE_PATTERNS); TRANSMEMBRANE (PHOBIUS); NON_CYTOPLASMIC_DOMAIN (PHOBIUS); CYTOPLASMIC_DOMAIN (PHOBIUS); TRANSMEMBRANE (PHOBIUS); CYTOPLASMIC_DOMAIN (PHOBIUS); TRANSMEMBRANE (PHOBIUS); NON_CYTOPLASMIC_DOMAIN (PHOBIUS); IPR001254 (PROSITE_PROFILES); IPR009003 (SUPERFAMILY); TMhelix (TMHMM)                                                                                                                                                                                                                                                                                                                                                                                                                                                                                                                                                                              |
| 2254 | c41290_g2_i5_len_4402_path_1_0_1148_115<br>0_1149_1176_15278_1177_1411_1404_1412<br>_1435_1428_1436_1447_14_3 | 420 | urokinase-type plasminogen activator            | 1468 | 8.15E-59 | 56.00% | 0.172 | IPR002172 (PRINTS); IPR003609 (SMART); IPR001254 (SMART); IPR002172 (SMART); IPR003014 (PFAM); IPR002172 (PFAM); IPR002172 (G3DSA:4.10.400.GENE3D); G3DSA:2.40.10.10 (GENE3D); G3DSA:2.40.10.10 (GENE3D); G3DSA:2.40.10.10 (GENE3D); IPR002172 (G3DSA:4.10.400.GENE3D); IPR001254 (PFAM); G3DSA:3.50.4.10 (GENE3D); PTHR24265 (PANTHER); IPR018114 (PROSITE_PATTERNS); IPR018114 (PROSITE_PATTERNS); IPR023415 (PROSITE_PATTERNS); TRANSMEMBRANE (PHOBIUS); NON_CYTOPLASMIC_DOMAIN (PHOBIUS); TRANSMEMBRANE (PHOBIUS); CYTOPLASMIC_DOMAIN (PHOBIUS); CYTOPLASMIC_DOMAIN (PHOBIUS); TRANSMEMBRANE (PHOBIUS); NON_CYTOPLASMIC_DOMAIN (PHOBIUS); TRANSMEMBRANE (PHOBIUS); CYTOPLASMIC_DOMAIN (PHOBIUS); IPR003609 (PROSITE_PROFILES); IPR002172 (PROSITE_PROFILES); IPR003609 (PROSITE_PROFILES); IPR002172 (PROSITE_PROFILES); IPR003609 (PROSITE_PROFILES); IPR002172 (PROSITE_PROFILES); IPR001254 (PROSITE_PROFILES); IPR003609 (PROSITE_PROFILES); IPR002172 (SUPERFAMILY); IPR002172 (SUPERFAMILY); IPR002172 (SUPERFAMILY); IPR009003 (SUPERFAMILY); TMhelix (TMHMM); TMhelix (TMHMM) |

|      |                                                                                                        |     |                                      |      |          |        |       |                                                                                                                                                                                                                                                                                                                                                                                                                                                                                                                                                                                                                                                                                                                                                                                                                                                                                                                                                                                   |
|------|--------------------------------------------------------------------------------------------------------|-----|--------------------------------------|------|----------|--------|-------|-----------------------------------------------------------------------------------------------------------------------------------------------------------------------------------------------------------------------------------------------------------------------------------------------------------------------------------------------------------------------------------------------------------------------------------------------------------------------------------------------------------------------------------------------------------------------------------------------------------------------------------------------------------------------------------------------------------------------------------------------------------------------------------------------------------------------------------------------------------------------------------------------------------------------------------------------------------------------------------|
| 2255 | c41290_g2_i7_len_1986_path_1_0_1148_115_0_1149_1176_15278_1177_1411_1404_1412_1435_1428_1436_1447_14_5 | 174 | urokinase-type plasminogen activator | 662  | 1.88E-56 | 55.00% | 0.105 | IPR001314 (PRINTS); IPR001254 (SMART); IPR002172 (G3DSA:4.10.400.GENE3D); G3DSA:2.40.10.10 (GENE3D); G3DSA:2.40.10.10 (GENE3D); G3DSA:2.40.10.10 (GENE3D); IPR002172 (PFAM); IPR001254 (PFAM); PTHR24265 (PANTHER); IPR018114 (PROSITE_PATTERNS); NON_CYTOPLASMIC_DOMAIN (PHOBIUS); TRANSMEMBRANE (PHOBIUS); TRANSMEMBRANE (PHOBIUS); CYTOPLASMIC_DOMAIN (PHOBIUS); NON_CYTOPLASMIC_DOMAIN (PHOBIUS); CYTOPLASMIC_DOMAIN (PHOBIUS); TRANSMEMBRANE (PHOBIUS); IPR001254 (PROSITE_PROFILES); IPR002172 (PROSITE_PROFILES); IPR002172 (SUPERFAMILY); IPR009003 (SUPERFAMILY); TMhelix (TMHMM)                                                                                                                                                                                                                                                                                                                                                                                        |
| 2256 | c41290_g3_i1_len_2939_path_24287_0_59_1_5982_60_185_24469_186_201_8710_202_5_25_24801_526_539_2481_5   | 670 | urokinase-type plasminogen activator | 979  | 1.07E-58 | 48.20% | 0.1   | IPR002172 (PRINTS); IPR003609 (SMART); IPR001254 (SMART); IPR002172 (SMART); IPR002172 (PFAM); IPR002172 (G3DSA:4.10.400.GENE3D); IPR001254 (PFAM); IPR002172 (G3DSA:4.10.400.GENE3D); G3DSA:2.40.10.10 (GENE3D); G3DSA:2.40.10.10 (GENE3D); IPR002172 (G3DSA:4.10.400.GENE3D); PTHR24265 (PANTHER); IPR023415 (PROSITE_PATTERNS); IPR018114 (PROSITE_PATTERNS); IPR018114 (PROSITE_PATTERNS); CYTOPLASMIC_DOMAIN (PHOBIUS); NON_CYTOPLASMIC_DOMAIN (PHOBIUS); TRANSMEMBRANE (PHOBIUS); CYTOPLASMIC_DOMAIN (PHOBIUS); TRANSMEMBRANE (PHOBIUS); IPR001254 (PROSITE_PROFILES); IPR002172 (PROSITE_PROFILES); IPR003609 (PROSITE_PROFILES); IPR002172 (PROSITE_PROFILES); IPR002172 (PROSITE_PROFILES); IPR003609 (PROSITE_PROFILES); IPR003609 (PROSITE_PROFILES); IPR009003 (SUPERFAMILY); IPR002172 (SUPERFAMILY); IPR002172 (SUPERFAMILY); IPR002172 (SUPERFAMILY); TMhelix (TMHMM); TMhelix (TMHMM)                                                                             |
| 2257 | c41290_g3_i2_len_3125_path_24287_0_59_1_5982_60_185_24469_186_201_8710_202_5_25_24801_526_539_2481_5   | 642 | urokinase-type plasminogen activator | 1041 | 2.36E-58 | 46.30% | 0.1   | IPR002172 (PRINTS); IPR002172 (SMART); IPR003609 (SMART); IPR001254 (SMART); G3DSA:2.40.10.10 (GENE3D); IPR001254 (PFAM); IPR002172 (G3DSA:4.10.400.GENE3D); IPR002172 (G3DSA:4.10.400.GENE3D); G3DSA:2.40.10.10 (GENE3D); IPR002172 (PFAM); IPR002172 (G3DSA:4.10.400.GENE3D); PTHR24265 (PANTHER); IPR023415 (PROSITE_PATTERNS); IPR018114 (PROSITE_PATTERNS); IPR018114 (PROSITE_PATTERNS); CYTOPLASMIC_DOMAIN (PHOBIUS); NON_CYTOPLASMIC_DOMAIN (PHOBIUS); TRANSMEMBRANE (PHOBIUS); TRANSMEMBRANE (PHOBIUS); TRANSMEMBRANE (PHOBIUS); CYTOPLASMIC_DOMAIN (PHOBIUS); NON_CYTOPLASMIC_DOMAIN (PHOBIUS); IPR002172 (PROSITE_PROFILES); IPR003609 (PROSITE_PROFILES); IPR002172 (PROSITE_PROFILES); IPR002172 (PROSITE_PROFILES); IPR001254 (PROSITE_PROFILES); IPR003609 (PROSITE_PROFILES); IPR003609 (PROSITE_PROFILES); IPR002172 (SUPERFAMILY); IPR009003 (SUPERFAMILY); IPR002172 (SUPERFAMILY); IPR002172 (SUPERFAMILY); TMhelix (TMHMM); TMhelix (TMHMM); TMhelix (TMHMM) |
| 2258 | c41290_g3_i3_len_711_path_30431_0_23_25_438_24_389_25801_390_448_21094_449_4_57_20894_458_544_3321_3   | 161 | complement component factor i        | 237  | 4.09E-21 | 53.30% | 0.114 | IPR001314 (PRINTS); IPR002172 (SMART); IPR002172 (G3DSA:4.10.400.GENE3D); IPR002172 (PFAM); G3DSA:2.40.10.10 (GENE3D); G3DSA:2.40.10.10 (GENE3D); IPR001254 (PFAM); PTHR24265 (PANTHER); PTHR24265:SF76 (PANTHER); IPR023415 (PROSITE_PATTERNS); IPR018114 (PROSITE_PATTERNS); IPR003609 (PROSITE_PROFILES); IPR001254 (PROSITE_PROFILES); IPR002172 (PROSITE_PROFILES); IPR002172 (SUPERFAMILY); IPR009003 (SUPERFAMILY)                                                                                                                                                                                                                                                                                                                                                                                                                                                                                                                                                         |
| 2259 | c41290_g4_i1_len_1130_path_19551_0_875_1150_876_903_1178_904_1129_4                                    | 102 | adhesive serine protease             | 377  | 5.55E-21 | 62.90% | 0.279 | IPR001254 (SMART); IPR001254 (PFAM); G3DSA:2.40.10.10 (GENE3D); PTHR24256 (PANTHER); IPR018114 (PROSITE_PATTERNS); TRANSMEMBRANE (PHOBIUS); CYTOPLASMIC_DOMAIN (PHOBIUS); NON_CYTOPLASMIC_DOMAIN (PHOBIUS); IPR001254 (PROSITE_PROFILES); IPR009003 (SUPERFAMILY); TMhelix (TMHMM)                                                                                                                                                                                                                                                                                                                                                                                                                                                                                                                                                                                                                                                                                                |

|      |                                                                                                         |      |                                               |      |           |        |       |                                                                                                                                                                                                                                                                                                                                                                                                                                                                                                                                                                            |
|------|---------------------------------------------------------------------------------------------------------|------|-----------------------------------------------|------|-----------|--------|-------|----------------------------------------------------------------------------------------------------------------------------------------------------------------------------------------------------------------------------------------------------------------------------------------------------------------------------------------------------------------------------------------------------------------------------------------------------------------------------------------------------------------------------------------------------------------------------|
| 2260 | c41306_g9_i1_len_3450_path_6053_0_2341_1704_2342_3167_32093_3168_3177_32103_3178_3181_32107_3182_31_5   | 1897 | torsin- partial                               | 1150 | 4.40E-104 | 66.80% | 0.212 | Coil (COILS); IPR010448 (PFAM); IPR027417 (G3DSA:3.40.50.GENE3D); IPR010448 (PANTHER); TRANSMEMBRANE (PHOBIUS); NON_CYTOPLASMIC_DOMAIN (PHOBIUS); TRANSMEMBRANE (PHOBIUS); NON_CYTOPLASMIC_DOMAIN (PHOBIUS); TRANSMEMBRANE (PHOBIUS); NON_CYTOPLASMIC_DOMAIN (PHOBIUS); TRANSMEMBRANE (PHOBIUS); CYTOPLASMIC_DOMAIN (PHOBIUS); NON_CYTOPLASMIC_DOMAIN (PHOBIUS); TRANSMEMBRANE (PHOBIUS); CYTOPLASMIC_DOMAIN (PHOBIUS); TRANSMEMBRANE (PHOBIUS); IPR027417 (SUPERFAMILY); TMhelix (TMHMM); TMhelix (TMHMM); TMhelix (TMHMM); TMhelix (TMHMM); TMhelix (TMHMM)              |
| 2261 | c41306_g9_i3_len_1111_path_1684_0_19_17_04_20_845_32093_846_855_32103_856_859_32107_860_861_32109_86_3  | 393  | torsin-1b-like isoform x1                     | 371  | 1.47E-77  | 66.90% | 0.2   | IPR001270 (PRINTS); IPR010448 (PFAM); IPR027417 (G3DSA:3.40.50.GENE3D); IPR010448 (PANTHER); TRANSMEMBRANE (PHOBIUS); NON_CYTOPLASMIC_DOMAIN (PHOBIUS); CYTOPLASMIC_DOMAIN (PHOBIUS); TRANSMEMBRANE (PHOBIUS); NON_CYTOPLASMIC_DOMAIN (PHOBIUS); IPR027417 (SUPERFAMILY)                                                                                                                                                                                                                                                                                                   |
| 2262 | c41306_g9_i5_len_3433_path_6053_0_2341_1704_2342_3167_32093_3168_3177_32103_3178_3181_32107_3182_31_3   | 1897 | torsin- partial                               | 1145 | 7.02E-104 | 66.80% | 0.2   | Coil (COILS); IPR027417 (G3DSA:3.40.50.GENE3D); IPR010448 (PFAM); IPR010448 (PANTHER); TRANSMEMBRANE (PHOBIUS); TRANSMEMBRANE (PHOBIUS); NON_CYTOPLASMIC_DOMAIN (PHOBIUS); TRANSMEMBRANE (PHOBIUS); NON_CYTOPLASMIC_DOMAIN (PHOBIUS); TRANSMEMBRANE (PHOBIUS); CYTOPLASMIC_DOMAIN (PHOBIUS); CYTOPLASMIC_DOMAIN (PHOBIUS); NON_CYTOPLASMIC_DOMAIN (PHOBIUS); TRANSMEMBRANE (PHOBIUS); TRANSMEMBRANE (PHOBIUS); NON_CYTOPLASMIC_DOMAIN (PHOBIUS); CYTOPLASMIC_DOMAIN (PHOBIUS); IPR027417 (SUPERFAMILY); TMhelix (TMHMM); TMhelix (TMHMM); TMhelix (TMHMM); TMhelix (TMHMM) |
| 2263 | c41328_g1_i1_len_2313_path_4288_0_384_4_673_385_413_4702_414_478_4766_479_494_1390_495_556_4843_557_4   | 1180 | amine oxidase                                 | 771  | 7.40E-167 | 65.00% | 0.118 | IPR001613 (PRINTS); G3DSA:3.90.660.10 (GENE3D); IPR016040 (G3DSA:3.40.50.GENE3D); IPR002937 (PFAM); PF13450 (PFAM); G3DSA:1.10.405.10 (GENE3D); PTHR10742:SF253 (PANTHER); PTHR10742 (PANTHER); NON_CYTOPLASMIC_DOMAIN (PHOBIUS); CYTOPLASMIC_DOMAIN (PHOBIUS); TRANSMEMBRANE (PHOBIUS); SSF51905 (SUPERFAMILY); SSF54373 (SUPERFAMILY)                                                                                                                                                                                                                                    |
| 2264 | c41328_g1_i2_len_2604_path_4288_0_384_4_673_385_413_4702_414_478_4766_479_494_1390_495_556_4843_557_4   | 1010 | amine oxidase                                 | 868  | 5.17E-166 | 65.10% | 0.103 | IPR001613 (PRINTS); PF13450 (PFAM); G3DSA:3.90.660.10 (GENE3D); IPR016040 (G3DSA:3.40.50.GENE3D); G3DSA:1.10.405.10 (GENE3D); IPR002937 (PFAM); PTHR10742:SF253 (PANTHER); PTHR10742 (PANTHER); TRANSMEMBRANE (PHOBIUS); NON_CYTOPLASMIC_DOMAIN (PHOBIUS); CYTOPLASMIC_DOMAIN (PHOBIUS); SSF54373 (SUPERFAMILY); SSF51905 (SUPERFAMILY)                                                                                                                                                                                                                                    |
| 2265 | c41328_g1_i3_len_2326_path_4288_0_384_8_381_385_426_4702_427_491_1374_492_507_1390_508_569_4843_570_4   | 1184 | amine oxidase                                 | 775  | 8.92E-167 | 65.10% | 0.118 | IPR001613 (PRINTS); IPR016040 (G3DSA:3.40.50.GENE3D); PF13450 (PFAM); G3DSA:3.90.660.10 (GENE3D); IPR002937 (PFAM); G3DSA:1.10.405.10 (GENE3D); PTHR10742:SF253 (PANTHER); PTHR10742 (PANTHER); CYTOPLASMIC_DOMAIN (PHOBIUS); NON_CYTOPLASMIC_DOMAIN (PHOBIUS); TRANSMEMBRANE (PHOBIUS); TRANSMEMBRANE (PHOBIUS); NON_CYTOPLASMIC_DOMAIN (PHOBIUS); SSF54373 (SUPERFAMILY); SSF51905 (SUPERFAMILY); TMhelix (TMHMM); TMhelix (TMHMM)                                                                                                                                       |
| 2266 | c41335_g1_i1_len_2793_path_27212_0_504_29462_505_567_27778_568_640_27850_641_650_17224_651_2052_220_1   | 294  | cadherin egf lag seven-pass g-type receptor 2 | 931  | 7.68E-18  | 41.00% | 0.285 | IPR002126 (SMART); IPR002126 (G3DSA:2.60.40.GENE3D); IPR002126 (G3DSA:2.60.40.GENE3D); PTHR24027 (PANTHER); SIGNAL_PEPTIDE_N_REGION (PHOBIUS); SIGNAL_PEPTIDE (PHOBIUS); SIGNAL_PEPTIDE_C_REGION (PHOBIUS); SIGNAL_PEPTIDE_H_REGION (PHOBIUS); NON_CYTOPLASMIC_DOMAIN (PHOBIUS); IPR002126 (PROSITE_PROFILES); IPR002126 (PROSITE_PROFILES); IPR015919 (SUPERFAMILY); IPR015919 (SUPERFAMILY); TMhelix (TMHMM)                                                                                                                                                             |
| 2267 | c41335_g2_i1_len_2638_path_22083_0_61_2_2144_62_808_22891_809_811_22894_812_1_556_16558_1557_2369_169_0 | 1324 | protocadherin fat partial                     | 880  | 9.11E-14  | 45.00% | 0.303 | IPR002126 (PRINTS); IPR002126 (SMART); IPR002126 (G3DSA:2.60.40.GENE3D); IPR002126 (G3DSA:2.60.40.GENE3D); IPR002126 (PFAM); IPR002126 (G3DSA:2.60.40.GENE3D); PTHR24027 (PANTHER); NON_CYTOPLASMIC_DOMAIN (PHOBIUS); CYTOPLASMIC_DOMAIN (PHOBIUS); NON_CYTOPLASMIC_DOMAIN (PHOBIUS); TRANSMEMBRANE (PHOBIUS); TRANSMEMBRANE (PHOBIUS); IPR002126 (PROSITE_PROFILES); IPR002126 (PROSITE_PROFILES); IPR015919 (SUPERFAMILY); IPR015919 (SUPERFAMILY); TMhelix (TMHMM); TMhelix (TMHMM)                                                                                     |







|      |                                                                                                         |      |                                |     |           |        |       |                                                                                                                                                                                                                                                                                                                                                                                                                                                                                                                                     |
|------|---------------------------------------------------------------------------------------------------------|------|--------------------------------|-----|-----------|--------|-------|-------------------------------------------------------------------------------------------------------------------------------------------------------------------------------------------------------------------------------------------------------------------------------------------------------------------------------------------------------------------------------------------------------------------------------------------------------------------------------------------------------------------------------------|
| 2276 | c41368_g19_i1_len_2321_path_23295_0_255_23546_256_258_17316_259_440_23725__4_41_2294_43102_2295_22_0    | 793  | cathepsin I-associated protein | 774 | 1.96E-78  | 60.90% | 0.298 | IPR000782 (SMART); IPR000782 (G3DSA:2.30.180.GENE3D); IPR000782 (PFAM); IPR000782 (G3DSA:2.30.180.GENE3D); PTHR10900 (PANTHER); TRANSMEMBRANE (PHOBIUS); NON_CYTOPLASMIC_DOMAIN (PHOBIUS); TRANSMEMBRANE (PHOBIUS); CYTOPLASMIC_DOMAIN (PHOBIUS); TRANSMEMBRANE (PHOBIUS); NON_CYTOPLASMIC_DOMAIN (PHOBIUS); CYTOPLASMIC_DOMAIN (PHOBIUS); IPR000782 (PROSITE_PROFILES); IPR000782 (PROSITE_PROFILES); IPR000782 (SUPERFAMILY); IPR000782 (SUPERFAMILY); IPR000782 (SUPERFAMILY); TMhelix (TMHMM); TMhelix (TMHMM); TMhelix (TMHMM) |
| 2277 | c41381_g1_i2_len_2480_path_598_0_352_95_1_353_366_965_367_367_966_368_595_235_95_596_606_23606_607_61_5 | 3839 | trypsinogen 2                  | 826 | 1.82E-69  | 61.70% | 0.111 | IPR001314 (PRINTS); IPR001254 (SMART); G3DSA:2.40.10.10 (GENE3D); G3DSA:2.40.10.10 (GENE3D); G3DSA:2.40.10.10 (GENE3D); IPR001254 (PFAM); PTHR24265 (PANTHER); IPR018114 (PROSITE_PATTERNS); IPR018114 (PROSITE_PATTERNS); TRANSMEMBRANE (PHOBIUS); CYTOPLASMIC_DOMAIN (PHOBIUS); CYTOPLASMIC_DOMAIN (PHOBIUS); NON_CYTOPLASMIC_DOMAIN (PHOBIUS); TRANSMEMBRANE (PHOBIUS); IPR001254 (PROSITE_PROFILES); IPR009003 (SUPERFAMILY); TMhelix (TMHMM)                                                                                   |
| 2278 | c41381_g1_i6_len_2521_path_7891_0_212_8_104_213_228_23318_229_236_8128_237_26_4_23328_265_285_23350_2_5 | 3764 | trypsinogen 2                  | 840 | 3.38E-65  | 61.80% | 0.111 | IPR001314 (PRINTS); IPR001254 (SMART); G3DSA:2.40.10.10 (GENE3D); IPR001254 (PFAM); G3DSA:2.40.10.10 (GENE3D); G3DSA:2.40.10.10 (GENE3D); PTHR24265 (PANTHER); IPR018114 (PROSITE_PATTERNS); IPR018114 (PROSITE_PATTERNS); CYTOPLASMIC_DOMAIN (PHOBIUS); NON_CYTOPLASMIC_DOMAIN (PHOBIUS); TRANSMEMBRANE (PHOBIUS); IPR001254 (PROSITE_PROFILES); IPR009003 (SUPERFAMILY); TMhelix (TMHMM)                                                                                                                                          |
| 2279 | c41381_g1_i9_len_2484_path_7891_0_212_8_104_213_228_23318_229_236_8128_237_26_4_23328_265_285_19468_2_5 | 3685 | trypsinogen 2                  | 828 | 4.10E-69  | 61.70% | 0.111 | IPR001314 (PRINTS); IPR001254 (SMART); G3DSA:2.40.10.10 (GENE3D); G3DSA:2.40.10.10 (GENE3D); G3DSA:2.40.10.10 (GENE3D); IPR001254 (PFAM); PTHR24265 (PANTHER); IPR018114 (PROSITE_PATTERNS); IPR018114 (PROSITE_PATTERNS); CYTOPLASMIC_DOMAIN (PHOBIUS); TRANSMEMBRANE (PHOBIUS); CYTOPLASMIC_DOMAIN (PHOBIUS); TRANSMEMBRANE (PHOBIUS); NON_CYTOPLASMIC_DOMAIN (PHOBIUS); IPR001254 (PROSITE_PROFILES); IPR009003 (SUPERFAMILY); TMhelix (TMHMM); TMhelix (TMHMM)                                                                  |
| 2280 | c41392_g2_i1_len_1334_path_17723_0_1274_2376_1275_1333_3                                                | 539  | gamma-glutamyl hydrolase       | 445 | 9.27E-100 | 65.80% | 0.183 | IPR029062 (G3DSA:3.40.50.GENE3D); IPR011697 (PFAM); IPR015527 (PANTHER); IPR015527 (PROSITE_PROFILES); IPR029062 (SUPERFAMILY)                                                                                                                                                                                                                                                                                                                                                                                                      |
| 2281 | c41392_g2_i2_len_1498_path_17723_0_1274_24682_1275_1279_10622_1280_1497_5                               | 503  | gamma-glutamyl hydrolase       | 499 | 2.56E-99  | 66.10% | 0.203 | IPR011697 (PFAM); IPR029062 (G3DSA:3.40.50.GENE3D); IPR015527 (PANTHER); IPR015527 (PROSITE_PROFILES); IPR029062 (SUPERFAMILY)                                                                                                                                                                                                                                                                                                                                                                                                      |
| 2282 | c41392_g2_i3_len_1377_path_17723_0_1274_24682_1275_1279_2338_1280_1317_2376_1318_1376_4                 | 485  | gamma-glutamyl hydrolase       | 459 | 1.45E-99  | 66.10% | 0.128 | IPR029062 (G3DSA:3.40.50.GENE3D); IPR011697 (PFAM); IPR015527 (PANTHER); IPR015527 (PROSITE_PROFILES); IPR029062 (SUPERFAMILY)                                                                                                                                                                                                                                                                                                                                                                                                      |

|  |                                                                                                               |       |                                   |      |           |        |        |                                                                                                                                                                                                                                                                                                                                                                                                                                                                                                                                                                                                                                                                                                                                                                                                                                                                                                                                                                                                                                                                                                                                                                                                                                                                                                                                                                                                                                               |
|--|---------------------------------------------------------------------------------------------------------------|-------|-----------------------------------|------|-----------|--------|--------|-----------------------------------------------------------------------------------------------------------------------------------------------------------------------------------------------------------------------------------------------------------------------------------------------------------------------------------------------------------------------------------------------------------------------------------------------------------------------------------------------------------------------------------------------------------------------------------------------------------------------------------------------------------------------------------------------------------------------------------------------------------------------------------------------------------------------------------------------------------------------------------------------------------------------------------------------------------------------------------------------------------------------------------------------------------------------------------------------------------------------------------------------------------------------------------------------------------------------------------------------------------------------------------------------------------------------------------------------------------------------------------------------------------------------------------------------|
|  | c41394_g2_i1_len_6022_path_2077_0_296_1<br>9816_297_399_19861_400_400_19862_401_<br>401_19863_402_411_19873_4 | 13902 | pacifastin light chain            | 2007 | 5.30E-58  | 45.00% | 0.269  | IPR002223 (PRINTS); IPR003645 (SMART); IPR006552 (SMART); IPR002223 (SMART); IPR008037 (PFAM); IPR002223 (PFAM); IPR002223 (G3DSA:4.10.410.GENE3D); IPR002223 (G3DSA:4.10.410.GENE3D); PTHR10083 (PANTHER); IPR020901 (PROSITE_PATTERNS); IPR020901 (PROSITE_PATTERNS); TRANSMEMBRANE (PHOBIUS); NON_CYTOPLASMIC_DOMAIN (PHOBIUS); TRANSMEMBRANE (PHOBIUS); CYTOPLASMIC_DOMAIN (PHOBIUS); CYTOPLASMIC_DOMAIN (PHOBIUS); NON_CYTOPLASMIC_DOMAIN (PHOBIUS); CYTOPLASMIC_DOMAIN (PHOBIUS); TRANSMEMBRANE (PHOBIUS); TRANSMEMBRANE (PHOBIUS); TRANSMEMBRANE (PHOBIUS); CYTOPLASMIC_DOMAIN (PHOBIUS); NON_CYTOPLASMIC_DOMAIN (PHOBIUS); IPR020862 (PROSITE_PROFILES); IPR002223 (PROSITE_PROFILES); IPR020862 (PROSITE_PROFILES); IPR002223 (PROSITE_PROFILES); IPR001190 (PROSITE_PROFILES); IPR002223 (PROSITE_PROFILES); IPR020862 (PROSITE_PROFILES); IPR020862 (PROSITE_PROFILES); IPR020862 (PROSITE_PROFILES); IPR002223 (SUPERFAMILY); IPR008037 (SUPERFAMILY); IPR002223 (SUPERFAMILY); IPR008037 (SUPERFAMILY); IPR008037 (SUPERFAMILY); IPR002223 (SUPERFAMILY); IPR008037 (SUPERFAMILY); IPR008037 (SUPERFAMILY); IPR008037 (SUPERFAMILY); IPR008037 (SUPERFAMILY); IPR008037 (TMhelix (TMHMM)); TMhelix (TMHMM); TMhelix (TMHMM); TMhelix (TMHMM) |
|  | c41421_g5_i2_len_2744_path_3018_0_140_3<br>159_141_143_3162_144_190_18135_191_22<br>4_18163_225_246_18185_2_4 | 14360 | perlucin 6                        | 915  | 3.64E-12  | 44.50% | 0.429Y | IPR001304 (SMART); IPR001304 (PFAM); IPR016186 (G3DSA:3.10.100.GENE3D); PTHR22802 (PANTHER); CYTOPLASMIC_DOMAIN (PHOBIUS); TRANSMEMBRANE (PHOBIUS); NON_CYTOPLASMIC_DOMAIN (PHOBIUS); IPR001304 (PROSITE_PROFILES); IPR016187 (SUPERFAMILY) Coil (COILS); IPR003593 (SMART); IPR005937 (TIGRFAM); IPR003959 (PFAM); G3DSA:1.10.8.60 (GENE3D); IPR027417 (G3DSA:3.40.50.GENE3D); PTHR23073.SF12 (PANTHER); PTHR23073 (PANTHER); IPR003960 (PROSITE_PATTERNS); NON_CYTOPLASMIC_DOMAIN (PHOBIUS); TRANSMEMBRANE (PHOBIUS); CYTOPLASMIC_DOMAIN (PHOBIUS); TRANSMEMBRANE (PHOBIUS); CYTOPLASMIC_DOMAIN (PHOBIUS); IPR027417 (SUPERFAMILY)                                                                                                                                                                                                                                                                                                                                                                                                                                                                                                                                                                                                                                                                                                                                                                                                          |
|  | c41452_g3_i1_len_1404_path_7135_0_1403_<br>4                                                                  | 147   | 26s protease regulatory subunit 8 | 468  | 0         | 97.10% | 0.1    | IPR023796 (SMART); G3DSA:3.30.497.10 (GENE3D); G3DSA:2.30.39.10 (GENE3D); IPR023796 (PFAM); IPR000215 (PANTHER); IPR023795 (PROSITE_PATTERNS); NON_CYTOPLASMIC_DOMAIN (PHOBIUS); CYTOPLASMIC_DOMAIN (PHOBIUS); NON_CYTOPLASMIC_DOMAIN (PHOBIUS); TRANSMEMBRANE (PHOBIUS); TRANSMEMBRANE (PHOBIUS); IPR023796 (SUPERFAMILY); TMhelix (TMHMM); TMhelix (TMHMM)                                                                                                                                                                                                                                                                                                                                                                                                                                                                                                                                                                                                                                                                                                                                                                                                                                                                                                                                                                                                                                                                                  |
|  | c41454_g5_i1_len_1657_path_3717_0_221_4<br>115_222_1293_35855_1294_1295_35857_12<br>96_1296_5190_1297_1656_2  | 127   | serpin 3                          | 552  | 3.62E-104 | 65.10% | 0.14   | IPR023796 (SMART); G3DSA:3.30.497.10 (GENE3D); G3DSA:2.30.39.10 (GENE3D); IPR023795 (PROSITE_PATTERNS); NON_CYTOPLASMIC_DOMAIN (PHOBIUS); CYTOPLASMIC_DOMAIN (PHOBIUS); NON_CYTOPLASMIC_DOMAIN (PHOBIUS); TRANSMEMBRANE (PHOBIUS); TRANSMEMBRANE (PHOBIUS); IPR023796 (SUPERFAMILY); TMhelix (TMHMM); TMhelix (TMHMM)                                                                                                                                                                                                                                                                                                                                                                                                                                                                                                                                                                                                                                                                                                                                                                                                                                                                                                                                                                                                                                                                                                                         |
|  | c41454_g5_i2_len_1838_path_3717_0_221_3<br>939_222_397_4115_398_1469_35855_1470_<br>1471_35857_1472_1472_75_1 | 131   | serpin 3                          | 613  | 1.70E-97  | 63.60% | 0.181  | G3DSA:2.30.39.10 (GENE3D); IPR000215 (PANTHER); IPR023795 (PROSITE_PATTERNS); IPR023796 (SUPERFAMILY)                                                                                                                                                                                                                                                                                                                                                                                                                                                                                                                                                                                                                                                                                                                                                                                                                                                                                                                                                                                                                                                                                                                                                                                                                                                                                                                                         |
|  | c41454_g5_i3_len_1833_path_3717_0_221_3<br>939_222_397_4115_398_1469_35855_1470_<br>1471_35857_1472_1472_51_1 | 142   | serpin 3                          | 611  | 1.82E-104 | 64.40% | 0.181  | IPR023796 (SMART); G3DSA:3.30.497.10 (GENE3D); IPR023796 (PFAM); G3DSA:2.30.39.10 (GENE3D); IPR000215 (PANTHER); IPR023795 (PROSITE_PATTERNS); IPR023796 (SUPERFAMILY)                                                                                                                                                                                                                                                                                                                                                                                                                                                                                                                                                                                                                                                                                                                                                                                                                                                                                                                                                                                                                                                                                                                                                                                                                                                                        |
|  | c41454_g5_i4_len_1761_path_3717_0_221_3<br>939_222_397_4115_398_1469_35855_1470_<br>1471_21297_1472_1760_1    | 125   | serpin 3                          | 587  | 1.07E-98  | 63.70% | 0.181  | IPR023796 (SMART); IPR023796 (PFAM); G3DSA:2.30.39.10 (GENE3D); G3DSA:3.30.497.10 (GENE3D); IPR000215 (PANTHER); PTHR11461.SF52 (PANTHER); IPR023795 (PROSITE_PATTERNS); IPR023796 (SUPERFAMILY)                                                                                                                                                                                                                                                                                                                                                                                                                                                                                                                                                                                                                                                                                                                                                                                                                                                                                                                                                                                                                                                                                                                                                                                                                                              |

|      |                                                                                                         |       |                                                         |      |           |        |       |                                                                                                                                                                                                                                                                                                                                                                                                                                                                                                                        |
|------|---------------------------------------------------------------------------------------------------------|-------|---------------------------------------------------------|------|-----------|--------|-------|------------------------------------------------------------------------------------------------------------------------------------------------------------------------------------------------------------------------------------------------------------------------------------------------------------------------------------------------------------------------------------------------------------------------------------------------------------------------------------------------------------------------|
| 2290 | c41471_g8_i1_len_9865_path_34383_0_1_17_617_2_143_17759_144_9864_3                                      | 7231  | lipophorin precursor                                    | 3289 | 0         | 44.30% | 0.124 | Coil (COILS); IPR001846 (SMART); IPR009454 (PFAM); IPR011030 (G3DSA:1.25.10.GENE3D); IPR001747 (PFAM); IPR015817 (G3DSA:2.20.50.GENE3D); IPR015255 (PFAM); IPR001846 (PFAM); IPR015818 (G3DSA:2.20.80.GENE3D); IPR014853 (PFAM); PTHR23345 (PANTHER); CYTOPLASMIC_DOMAIN (PHOBIUS); TRANSMEMBRANE (PHOBIUS); NON_CYTOPLASMIC_DOMAIN (PHOBIUS); TRANSMEMBRANE (PHOBIUS); NON_CYTOPLASMIC_DOMAIN (PHOBIUS); IPR001747 (PROSITE_PROFILES); IPR001846 (PROSITE_PROFILES); IPR011030 (SUPERFAMILY); IPR015819 (SUPERFAMILY) |
| 2291 | c41473_g1_i1_len_9142_path_12739_0_87_1_2827_88_170_12910_171_264_13003_265_3_36_3170_337_470_13207_4_1 | 91294 | low quality protein: hemocytin-like                     | 3047 | 5.80E-45  | 38.90% | 0.154 | PTHR11339 (PANTHER); PTHR11339:SF25 (PANTHER); CYTOPLASMIC_DOMAIN (PHOBIUS); SIGNAL_PEPTIDE (PHOBIUS); NON_CYTOPLASMIC_DOMAIN (PHOBIUS); SIGNAL_PEPTIDE_N_REGION (PHOBIUS); TRANSMEMBRANE (PHOBIUS); SIGNAL_PEPTIDE_H_REGION (PHOBIUS); SIGNAL_PEPTIDE_C_REGION (PHOBIUS); IPR006207 (PROSITE_PROFILES); IPR001846 (PROSITE_PROFILES); IPR001007 (PROSITE_PROFILES); IPR002919 (SUPERFAMILY); TMhelix (TMHMM)                                                                                                          |
| 2292 | c41504_g1_i1_len_2910_path_2128_0_21_18_842_22_45_2174_46_62_2191_63_121_2250_122_125_2254_126_282_2_4  | 1510  | gag-like protein                                        | 970  | 2.36E-14  | 45.40% | 0.143 | Coil (COILS); Coil (COILS); Coil (COILS); Coil (COILS); IPR001878 (SMART); IPR001878 (G3DSA:4.10.60.GENE3D); TRANSMEMBRANE (PHOBIUS); CYTOPLASMIC_DOMAIN (PHOBIUS); NON_CYTOPLASMIC_DOMAIN (PHOBIUS)                                                                                                                                                                                                                                                                                                                   |
| 2293 | c41586_g1_i1_len_1355_path_1333_0_1354_5                                                                | 48    | rna polymerase ii-associated protein 3                  | 451  | 6.14E-70  | 61.30% | 0.103 | Coil (COILS); Coil (COILS); IPR019734 (SMART); IPR001440 (PFAM); IPR011990 (G3DSA:1.25.40.GENE3D); PF13414 (PFAM); PTHR22904 (PANTHER); PTHR22904:SF292 (PANTHER); IPR019734 (PROSITE_PROFILES); IPR019734 (PROSITE_PROFILES); IPR019734 (PROSITE_PROFILES); IPR013026 (PROSITE_PROFILES); SSF48452 (SUPERFAMILY)                                                                                                                                                                                                      |
| 2294 | c41669_g1_i1_len_1665_path_1643_0_1664_1                                                                | 238   | macrophage mannose receptor 1-like                      | 555  | 1.20E-52  | 46.50% | 0.101 | IPR001304 (SMART); IPR016186 (G3DSA:3.10.100.GENE3D); IPR001304 (PFAM); IPR016186 (G3DSA:3.10.100.GENE3D); PTHR22803:SF16 (PANTHER); PTHR22803 (PANTHER); IPR018378 (PROSITE_PATTERNS); NON_CYTOPLASMIC_DOMAIN (PHOBIUS); TRANSMEMBRANE (PHOBIUS); CYTOPLASMIC_DOMAIN (PHOBIUS); IPR001304 (PROSITE_PROFILES); IPR001304 (PROSITE_PROFILES); IPR016187 (SUPERFAMILY); IPR016187 (SUPERFAMILY); IPR016187 (SUPERFAMILY); TMhelix (TMHMM); TMhelix (TMHMM)                                                               |
| 2295 | c41688_g1_i1_len_383_path_361_0_382_3                                                                   | 27    | folistatin-related protein 5-like                       | 128  | 3.93E-60  | 85.10% | 0.099 | PTHR10913 (PANTHER); PTHR10913:SF14 (PANTHER)                                                                                                                                                                                                                                                                                                                                                                                                                                                                          |
| 2296 | c41720_g1_i1_len_881_path_859_0_880_0                                                                   | 41    | plexin domain-containing protein 2-like                 | 294  | 9.37E-44  | 48.50% | 0.144 | IPR016201 (SMART); G3DSA:3.30.1680.10 (GENE3D); PTHR13055:SF12 (PANTHER); PTHR13055 (PANTHER); TRANSMEMBRANE (PHOBIUS); CYTOPLASMIC_DOMAIN (PHOBIUS); NON_CYTOPLASMIC_DOMAIN (PHOBIUS); TMhelix (TMHMM); TMhelix (TMHMM)                                                                                                                                                                                                                                                                                               |
| 2297 | c41721_g1_i1_len_266_path_244_0_265_2                                                                   | 4     | receptor-type tyrosine-protein phosphatase beta-partial | 88   | 3.37E-14  | 75.30% | 0.107 | IPR000242 (PRINTS); IPR029021 (G3DSA:3.90.190.GENE3D); IPR000242 (PFAM); PTHR19134:SF251 (PANTHER); PTHR19134 (PANTHER); IPR000242 (PROSITE_PROFILES); IPR000387 (PROSITE_PROFILES); IPR029021 (SUPERFAMILY)                                                                                                                                                                                                                                                                                                           |
| 2298 | c41729_g1_i1_len_458_path_1_0_457_0                                                                     | 12    | xanthine dehydrogenase oxidase                          | 153  | 5.73E-71  | 82.30% | 0.108 | IPR008274 (G3DSA:3.30.365.GENE3D); IPR008274 (G3DSA:3.30.365.GENE3D); IPR008274 (PFAM); PTHR11908:SF32 (PANTHER); PTHR11908 (PANTHER); IPR022407 (PROSITE_PATTERNS); IPR008274 (SUPERFAMILY)                                                                                                                                                                                                                                                                                                                           |
| 2299 | c41764_g1_i1_len_2028_path_2006_0_2027_0                                                                | 133   | isoform e                                               | 676  | 0         | 90.50% | 0.135 | IPR002290 (SMART); IPR000719 (PFAM); G3DSA:1.10.510.10 (GENE3D); G3DSA:3.30.200.20 (GENE3D); IPR013543 (PFAM); G3DSA:3.10.450.50 (GENE3D); IPR020636 (PANTHER); PTHR24347:SF108 (PANTHER); IPR017441 (PROSITE_PATTERNS); IPR008271 (PROSITE_PATTERNS); TRANSMEMBRANE (PHOBIUS); CYTOPLASMIC_DOMAIN (PHOBIUS); NON_CYTOPLASMIC_DOMAIN (PHOBIUS); IPR000719 (PROSITE_PROFILES); IPR011009 (SUPERFAMILY); SSF54427 (SUPERFAMILY)                                                                                          |
| 2300 | c41788_g1_i1_len_945_path_923_0_944_2                                                                   | 48    | isoform b                                               | 315  | 8.43E-42  | 52.90% | 0.149 | IPR000483 (SMART); G3DSA:3.80.10.10 (GENE3D); PTHR24365 (PANTHER); PTHR24365:SF269 (PANTHER); NON_CYTOPLASMIC_DOMAIN (PHOBIUS); CYTOPLASMIC_DOMAIN (PHOBIUS); TRANSMEMBRANE (PHOBIUS); SSF52058 (SUPERFAMILY); SSF52058 (SUPERFAMILY); TMhelix (TMHMM)                                                                                                                                                                                                                                                                 |
| 2301 | c41862_g1_i1_len_2315_path_2319_0_2314_4                                                                | 301   | alpha-2-macroglobulin-like protein 1                    | 772  | 2.05E-145 | 60.50% | 0.189 | IPR011626 (PFAM); IPR009048 (G3DSA:2.60.40.GENE3D); IPR009048 (PFAM); IPR008930 (G3DSA:1.50.10.GENE3D); PTHR11412 (PANTHER); IPR009048 (SUPERFAMILY); IPR008930 (SUPERFAMILY)                                                                                                                                                                                                                                                                                                                                          |
| 2302 | c41895_g1_i1_len_505_path_483_0_504_3                                                                   | 13    | preproneuropeptide f i                                  | 169  | 2.46E-17  | 64.13% | 0.299 | IPR020392 (PROSITE_PATTERNS); IPR001955 (PROSITE_PROFILES)                                                                                                                                                                                                                                                                                                                                                                                                                                                             |



|      |                                                             |      |                                                             |     |           |        |       |                                                                                                                                                                                                                                                                                                                                                                                                                                                                                                                                                                                                                                                                                                                                               |
|------|-------------------------------------------------------------|------|-------------------------------------------------------------|-----|-----------|--------|-------|-----------------------------------------------------------------------------------------------------------------------------------------------------------------------------------------------------------------------------------------------------------------------------------------------------------------------------------------------------------------------------------------------------------------------------------------------------------------------------------------------------------------------------------------------------------------------------------------------------------------------------------------------------------------------------------------------------------------------------------------------|
| 2303 | c41904_g1_i1_len_1459_path_1_0_1458_3                       | 2756 | lipase 3                                                    | 487 | 1.08E-141 | 67.30% | 0.164 | IPR029058 (G3DSA:3.40.50.GENE3D); IPR000073 (PFAM); IPR006693 (PFAM); PTHR11005 (PANTHER); PTHR11005:SF6 (PANTHER); NON_CYTOPLASMIC_DOMAIN (PHOBIUS); TRANSMEMBRANE (PHOBIUS); CYTOPLASMIC_DOMAIN (PHOBIUS); IPR029058 (SUPERFAMILY); TMhelix (TMHMM)                                                                                                                                                                                                                                                                                                                                                                                                                                                                                         |
| 2304 | c41924_g1_i1_len_816_path_1_0_815_3                         | 16   | e3 ubiquitin-protein ligase mib1                            | 272 | 7.09E-166 | 92.90% | 0.135 | IPR002110 (PRINTS); IPR002110 (SMART); IPR020683 (G3DSA:1.25.40.GENE3D); IPR002110 (PFAM); IPR020683 (PFAM); PTHR24202:SF52 (PANTHER); PTHR24202 (PANTHER); IPR002110 (PROSITE_PROFILES); IPR020683 (PROSITE_PROFILES); IPR002110 (PROSITE_PROFILES); IPR002110 (PROSITE_PROFILES); IPR002110 (PROSITE_PROFILES); IPR020683 (SUPERFAMILY)                                                                                                                                                                                                                                                                                                                                                                                                     |
| 2305 | c41946_g1_i1_len_273_path_251_0_272_2                       | 2203 | cytotoxic t lymphocyte-associated protein 2 alpha precursor | 91  | 2.37E-09  | 58.50% | 0.311 | G3DSA:3.90.70.10 (GENE3D); IPR013201 (PFAM); PTHR12411:SF289 (PANTHER); IPR013128 (PANTHER); TRANSMEMBRANE (PHOBIUS); CYTOPLASMIC_DOMAIN (PHOBIUS); NON_CYTOPLASMIC_DOMAIN (PHOBIUS); SSF54001 (SUPERFAMILY); TMhelix (TMHMM)                                                                                                                                                                                                                                                                                                                                                                                                                                                                                                                 |
| 2306 | c41950_g1_i1_len_306_path_284_0_305_1                       | 4    | gastrula zinc finger                                        | 102 | 6.15E-28  | 68.90% | 0.103 | IPR015880 (SMART); IPR013087 (G3DSA:3.30.160.GENE3D); IPR013087 (G3DSA:3.30.160.GENE3D); PF13912 (PFAM); PF13465 (PFAM); PTHR24409 (PANTHER); IPR007087 (PROSITE_PATTERNS); IPR007087 (PROSITE_PATTERNS); IPR007087 (PROSITE_PROFILES); IPR007087 (PROSITE_PROFILES); IPR007087 (PROSITE_PROFILES); SSF57667 (SUPERFAMILY); SSF57667 (SUPERFAMILY)                                                                                                                                                                                                                                                                                                                                                                                            |
| 2307 | c42008_g1_i1_len_2433_path_2411_0_2432_1                    | 148  | protein kinase c isoform x1                                 | 811 | 0         | 78.60% | 0.149 | IPR020454 (PRINTS); IPR002219 (SMART); IPR002290 (SMART); IPR000008 (SMART); IPR000961 (SMART); IPR000008 (PFAM); IPR014376 (PIRSF); IPR017892 (PFAM); G3DSA:3.30.60.20 (GENE3D); IPR002219 (PFAM); G3DSA:1.10.510.10 (GENE3D); G3DSA:3.30.200.20 (GENE3D); IPR000719 (PFAM); IPR000008 (G3DSA:2.60.40.GENE3D); PTHR24357 (PANTHER); PTHR24357:SF52 (PANTHER); IPR008271 (PROSITE_PATTERNS); IPR002219 (PROSITE_PATTERNS); IPR002219 (PROSITE_PATTERNS); IPR017441 (PROSITE_PATTERNS); IPR000961 (PROSITE_PROFILES); IPR002219 (PROSITE_PROFILES); IPR000008 (PROSITE_PROFILES); IPR000719 (PROSITE_PROFILES); IPR002219 (PROSITE_PROFILES); IPR000008 (SUPERFAMILY); SSF57889 (SUPERFAMILY); SSF57889 (SUPERFAMILY); IPR011009 (SUPERFAMILY) |
| 2308 | c42064_g1_i1_len_371_path_1_0_370_0                         | 10   | zinc c2h2 type domain-containing protein                    | 124 | 2.69E-22  | 61.30% | 0.106 | IPR015880 (SMART); IPR013087 (G3DSA:3.30.160.GENE3D); PF13465 (PFAM); IPR013087 (G3DSA:3.30.160.GENE3D); PTHR24409 (PANTHER); IPR007087 (PROSITE_PATTERNS); IPR007087 (PROSITE_PATTERNS); IPR007087 (PROSITE_PROFILES); IPR007087 (PROSITE_PROFILES); IPR007087 (PROSITE_PROFILES); SSF57667 (SUPERFAMILY); SSF57667 (SUPERFAMILY)                                                                                                                                                                                                                                                                                                                                                                                                            |
| 2309 | c42066_g1_i1_len_341_path_1_0_166_168_167_253_168_254_340_0 | 4    | zinc finger protein 501-like                                | 114 | 4.86E-21  | 69.90% | 0.126 | IPR015880 (SMART); IPR013087 (G3DSA:3.30.160.GENE3D); PF13465 (PFAM); IPR013087 (G3DSA:3.30.160.GENE3D); PTHR24409 (PANTHER); IPR007087 (PROSITE_PATTERNS); IPR007087 (PROSITE_PATTERNS); IPR007087 (PROSITE_PROFILES); IPR007087 (PROSITE_PROFILES); IPR007087 (PROSITE_PROFILES); SSF57667 (SUPERFAMILY); SSF57667 (SUPERFAMILY)                                                                                                                                                                                                                                                                                                                                                                                                            |
| 2310 | c42077_g1_i1_len_516_path_1_0_515_2                         | 14   | peroxisomal biogenesis aaa atpase pex1                      | 172 | 1.35E-95  | 88.90% | 0.114 | IPR003593 (SMART); IPR027417 (G3DSA:3.40.50.GENE3D); IPR003959 (PFAM); PTHR23077 (PANTHER); IPR025653 (PTHR23077:PANTHER); IPR003960 (PROSITE_PATTERNS); IPR027417 (SUPERFAMILY)                                                                                                                                                                                                                                                                                                                                                                                                                                                                                                                                                              |
| 2311 | c42116_g1_i1_len_377_path_1_0_376_0                         | 7    | thioredoxin-related transmembrane protein 2 homolog         | 126 | 3.31E-54  | 81.70% | 0.261 | IPR013766 (PFAM); IPR012336 (G3DSA:3.40.30.GENE3D); PTHR15853 (PANTHER); CYTOPLASMIC_DOMAIN (PHOBIUS); NON_CYTOPLASMIC_DOMAIN (PHOBIUS); TRANSMEMBRANE (PHOBIUS); IPR012336 (PROSITE_PROFILES); IPR012336 (SUPERFAMILY); TMhelix (TMHMM)                                                                                                                                                                                                                                                                                                                                                                                                                                                                                                      |
| 2312 | c42252_g1_i1_len_762_path_740_0_761_1                       | 20   | tyrosine-protein kinase btk29a isoform x3                   | 254 | 2.18E-157 | 93.00% | 0.11  | IPR001245 (PRINTS); IPR020635 (SMART); IPR016253 (PIRSF); G3DSA:3.30.200.20 (GENE3D); IPR001245 (PFAM); G3DSA:1.10.510.10 (GENE3D); PTHR24418:SF162 (PANTHER); PTHR24418 (PANTHER); IPR017441 (PROSITE_PATTERNS); IPR008266 (PROSITE_PATTERNS); IPR000719 (PROSITE_PROFILES); IPR011009 (SUPERFAMILY)                                                                                                                                                                                                                                                                                                                                                                                                                                         |

|      |                                          |     |                                                |     |           |        |        |                                                                                                                                                                                                                                                                                                                                                                                                                                                                                                                                                                                                                                                                |
|------|------------------------------------------|-----|------------------------------------------------|-----|-----------|--------|--------|----------------------------------------------------------------------------------------------------------------------------------------------------------------------------------------------------------------------------------------------------------------------------------------------------------------------------------------------------------------------------------------------------------------------------------------------------------------------------------------------------------------------------------------------------------------------------------------------------------------------------------------------------------------|
| 2313 | c42331_g1_i1_len_2029_path_2007_0_2028_5 | 196 | sphingomyelin phosphodiesterase                | 676 | 1.13E-175 | 62.40% | 0.568Y | IPR004843 (PFAM); IPR011001 (G3DSA:1.10.225.GENE3D); IPR029052 (G3DSA:3.60.21.GENE3D); IPR011160 (PIRSF); PTHR10340 (PANTHER); PTHR10340:SF13 (PANTHER); SIGNAL_PEPTIDE_C_REGION (PHOBIUS); SIGNAL_PEPTIDE_H_REGION (PHOBIUS); NON_CYTOPLASMIC_DOMAIN (PHOBIUS); CYTOPLASMIC_DOMAIN (PHOBIUS); TRANSMEMBRANE (PHOBIUS); SIGNAL_PEPTIDE (PHOBIUS); SIGNAL_PEPTIDE_N_REGION (PHOBIUS); IPR008139 (PROSITE_PROFILES); SignalP-TM (SIGNALP_EUK); SignalP-TM (SIGNALP_GRAM_POSITIVE); IPR011001 (SUPERFAMILY); IPR029052 (SUPERFAMILY); TMhelix (TMHMM)                                                                                                             |
| 2314 | c42337_g1_i1_len_322_path_300_0_321_3    | 6   | protein lap1-like                              | 108 | 1.38E-35  | 78.10% | 0.099  | IPR003591 (SMART); IPR001611 (PFAM); G3DSA:3.80.10.10 (GENE3D); IPR025875 (PFAM); PTHR23155:SF466 (PANTHER); PTHR23155 (PANTHER); IPR001611 (PROSITE_PROFILES); IPR001611 (PROSITE_PROFILES); IPR001611 (PROSITE_PROFILES); IPR001611 (PROSITE_PROFILES); IPR001611 (PROSITE_PROFILES); SSF52075 (SUPERFAMILY)                                                                                                                                                                                                                                                                                                                                                 |
| 2315 | c42477_g1_i1_len_877_path_1_0_876_0      | 28  | irregular chiasm c-roughest protein isoform x1 | 293 | 8.00E-129 | 78.10% | 0.099  | IPR003598 (SMART); IPR013162 (PFAM); PF13895 (PFAM); IPR013783 (G3DSA:2.60.40.GENE3D); IPR013783 (G3DSA:2.60.40.GENE3D); IPR013783 (G3DSA:2.60.40.GENE3D); PTHR11640:SF54 (PANTHER); PTHR11640 (PANTHER); IPR007110 (PROSITE_PROFILES); IPR007110 (PROSITE_PROFILES); SSF48726 (SUPERFAMILY); SSF48726 (SUPERFAMILY); SSF48726 (SUPERFAMILY)                                                                                                                                                                                                                                                                                                                   |
| 2316 | c42528_g1_i1_len_954_path_932_0_953_3    | 41  | zinc finger protein 350-like isoform x1        | 318 | 2.12E-56  | 80.00% | 0.107  | IPR015880 (SMART); IPR013087 (G3DSA:3.30.160.GENE3D); PF13465 (PFAM); IPR013087 (G3DSA:3.30.160.GENE3D); IPR013087 (G3DSA:3.30.160.GENE3D); IPR013087 (G3DSA:3.30.160.GENE3D); IPR007087 (PFAM); PTHR24409 (PANTHER); IPR007087 (PROSITE_PATTERNS); IPR007087 (PROSITE_PATTERNS); IPR007087 (PROSITE_PATTERNS); IPR007087 (PROSITE_PATTERNS); IPR007087 (PROSITE_PATTERNS); IPR007087 (PROSITE_PROFILES); IPR007087 (PROSITE_PROFILES); IPR007087 (PROSITE_PROFILES); IPR007087 (PROSITE_PROFILES); IPR007087 (PROSITE_PROFILES); IPR007087 (PROSITE_PROFILES); SSF57667 (SUPERFAMILY); SSF57667 (SUPERFAMILY); SSF57667 (SUPERFAMILY); SSF57667 (SUPERFAMILY) |
| 2317 | c42536_g1_i1_len_602_path_580_0_601_4    | 18  | eph receptor tyrosine                          | 201 | 3.53E-135 | 93.60% | 0.141  | IPR001245 (PRINTS); IPR020635 (SMART); G3DSA:1.10.510.10 (GENE3D); IPR013761 (G3DSA:1.1.10.150.GENE3D); IPR001245 (PFAM); PTHR24416:SF263 (PANTHER); PTHR24416 (PANTHER); IPR008266 (PROSITE_PATTERNS); IPR000719 (PROSITE_PROFILES); IPR001660 (PROSITE_PROFILES); IPR013761 (SUPERFAMILY); IPR011009 (SUPERFAMILY)                                                                                                                                                                                                                                                                                                                                           |
| 2318 | c42556_g1_i1_len_976_path_1_0_975_1      | 47  | zinc finger protein partial                    | 325 | 2.11E-115 | 73.20% | 0.335  | IPR015880 (SMART); IPR007087 (PFAM); PF13465 (PFAM); IPR013087 (G3DSA:3.30.160.GENE3D); IPR013087 (G3DSA:3.30.160.GENE3D); IPR013087 (G3DSA:3.30.160.GENE3D); PTHR24409 (PANTHER); IPR007087 (PROSITE_PATTERNS); IPR007087 (PROSITE_PATTERNS); IPR007087 (PROSITE_PATTERNS); IPR007087 (PROSITE_PATTERNS); IPR007087 (PROSITE_PROFILES); IPR007087 (PROSITE_PROFILES); IPR007087 (PROSITE_PROFILES); IPR007087 (PROSITE_PROFILES); IPR007087 (PROSITE_PROFILES); SSF57667 (SUPERFAMILY); SSF57667 (SUPERFAMILY); SSF57667 (SUPERFAMILY); SSF57667 (SUPERFAMILY)                                                                                                |
| 2319 | c42764_g1_i1_len_394_path_1_0_393_5      | 4   | melanotransferrin isoform x2                   | 131 | 3.69E-31  | 63.10% | 0.114  | IPR001156 (SMART); G3DSA:3.40.190.10 (GENE3D); IPR001156 (PFAM); PTHR11485 (PANTHER); IPR018195 (PROSITE_PATTERNS); IPR001156 (PROSITE_PROFILES); SSF53850 (SUPERFAMILY)                                                                                                                                                                                                                                                                                                                                                                                                                                                                                       |
| 2320 | c42813_g1_i1_len_1305_path_1_0_1304_0    | 47  | c4b-binding protein beta                       | 435 | 6.52E-159 | 62.50% | 0.122  | IPR000436 (SMART); IPR000436 (PFAM); G3DSA:2.10.70.10 (GENE3D); PTHR19325 (PANTHER); PTHR19325:SF230 (PANTHER); IPR000436 (PROSITE_PROFILES); IPR000436 (SUPERFAMILY); IPR000436 (SUPERFAMILY); IPR000436 (SUPERFAMILY); IPR000436 (SUPERFAMILY); IPR000436 (SUPERFAMILY)                                                                                                                                      |

|      |                                          |    |                                                                                                 |     |           |        |       |                                                                                                                                                                                                                                                                                                                                                                                                                                                                                                                                                                                                                                                                         |
|------|------------------------------------------|----|-------------------------------------------------------------------------------------------------|-----|-----------|--------|-------|-------------------------------------------------------------------------------------------------------------------------------------------------------------------------------------------------------------------------------------------------------------------------------------------------------------------------------------------------------------------------------------------------------------------------------------------------------------------------------------------------------------------------------------------------------------------------------------------------------------------------------------------------------------------------|
| 2321 | c42819_g1_i1_len_987_path_1_0_986_5      | 28 | g-protein coupled receptor mth2                                                                 | 329 | 4.32E-93  | 65.50% | 0.207 | IPR000832 (PRINTS); IPR000832 (PFAM); PTHR12011:SF244 (PANTHER); PTHR12011 (PANTHER); TRANSMEMBRANE (PHOBIUS); CYTOPLASMIC_DOMAIN (PHOBIUS); CYTOPLASMIC_DOMAIN (PHOBIUS); NON_CYTOPLASMIC_DOMAIN (PHOBIUS); TRANSMEMBRANE (PHOBIUS); TRANSMEMBRANE (PHOBIUS); CYTOPLASMIC_DOMAIN (PHOBIUS); TRANSMEMBRANE (PHOBIUS); TRANSMEMBRANE (PHOBIUS); CYTOPLASMIC_DOMAIN (PHOBIUS); TRANSMEMBRANE (PHOBIUS); TRANSMEMBRANE (PHOBIUS); NON_CYTOPLASMIC_DOMAIN (PHOBIUS); NON_CYTOPLASMIC_DOMAIN (PHOBIUS); NON_CYTOPLASMIC_DOMAIN (PHOBIUS); IPR017981 (PROSITE_PROFILES); TMhelix (TMHMM); TMhelix (TMHMM); TMhelix (TMHMM); TMhelix (TMHMM); TMhelix (TMHMM); TMhelix (TMHMM) |
| 2322 | c42862_g1_i1_len_312_path_1_0_311_4      | 6  | syntaxin-binding protein 5-like                                                                 | 104 | 1.19E-50  | 88.30% | 0.126 | IPR015943 (G3DSA:2.130.10.GENE3D); IPR001680 (PFAM); PTHR10241:SF22 (PANTHER); PTHR10241 (PANTHER); IPR019775 (PROSITE_PATTERNS)                                                                                                                                                                                                                                                                                                                                                                                                                                                                                                                                        |
| 2323 | c42872_g1_i1_len_1098_path_1076_0_1097_2 | 47 | interleukin-1 receptor-associated kinase 4                                                      | 366 | 3.12E-109 | 67.20% | 0.102 | IPR002290 (SMART); G3DSA:1.10.510.10 (GENE3D); G3DSA:3.30.200.20 (GENE3D); IPR000719 (PFAM); PTHR24419:SF0 (PANTHER); PTHR24419 (PANTHER); IPR017441 (PROSITE_PATTERNS); IPR008271 (PROSITE_PATTERNS); IPR000719 (PROSITE_PROFILES); IPR011009 (SUPERFAMILY)                                                                                                                                                                                                                                                                                                                                                                                                            |
| 2324 | c42952_g1_i1_len_318_path_1_0_317_5      | 6  | vitellogenin partial                                                                            | 106 | 2.85E-24  | 64.70% | 0.105 | no IPS match                                                                                                                                                                                                                                                                                                                                                                                                                                                                                                                                                                                                                                                            |
| 2325 | c42986_g1_i1_len_315_path_293_0_314_1    | 6  | laminin a                                                                                       | 105 | 2.25E-47  | 87.60% | 0.1   | IPR008211 (SMART); IPR008211 (PFAM); PTHR10574:SF39 (PANTHER); PTHR10574 (PANTHER); IPR008211 (PROSITE_PROFILES)                                                                                                                                                                                                                                                                                                                                                                                                                                                                                                                                                        |
| 2326 | c43000_g1_i1_len_989_path_967_0_988_2    | 73 | probable cytosolic iron-sulfur protein assembly protein ciao1 isoform x1                        | 329 | 9.13E-154 | 82.60% | 0.135 | IPR020472 (PRINTS); IPR001680 (SMART); IPR001680 (PFAM); IPR015943 (G3DSA:2.130.10.GENE3D); PTHR19920:SF0 (PANTHER); PTHR19920 (PANTHER); IPR019775 (PROSITE_PATTERNS); IPR028608 (HAMAP); IPR001680 (PROSITE_PROFILES); IPR001680 (PROSITE_PROFILES); IPR017986 (PROSITE_PROFILES); IPR001680 (PROSITE_PROFILES); IPR001680 (PROSITE_PROFILES); IPR001680 (PROSITE_PROFILES); IPR017986 (SUPERFAMILY)                                                                                                                                                                                                                                                                  |
| 2327 | c43022_g1_i1_len_399_path_1_0_398_1      | 19 | senseless- isoform a                                                                            | 133 | 5.10E-20  | 53.00% | 0.101 | IPR015880 (SMART); PF13465 (PFAM); PF13912 (PFAM); IPR013087 (G3DSA:3.30.160.GENE3D); IPR013087 (G3DSA:3.30.160.GENE3D); IPR013087 (G3DSA:3.30.160.GENE3D); PTHR24409:SF14 (PANTHER); PTHR24409 (PANTHER); IPR007087 (PROSITE_PATTERNS); IPR007087 (PROSITE_PATTERNS); IPR007087 (PROSITE_PATTERNS); IPR007087 (PROSITE_PATTERNS); IPR007087 (PROSITE_PROFILES); IPR007087 (PROSITE_PROFILES); IPR007087 (PROSITE_PROFILES); SSF57667 (SUPERFAMILY); SSF57667 (SUPERFAMILY)                                                                                                                                                                                             |
| 2328 | c43024_g1_i1_len_748_path_726_0_747_1    | 11 | taf5-like rna polymerase ii p300 cbp-associated factor-associated factor 65 kda subunit partial | 249 | 8.39E-71  | 73.80% | 0.101 | IPR020472 (PRINTS); IPR001680 (SMART); IPR001680 (PFAM); IPR015943 (G3DSA:2.130.10.GENE3D); PTHR19879:SF3 (PANTHER); PTHR19879 (PANTHER); IPR019775 (PROSITE_PATTERNS); IPR019775 (PROSITE_PATTERNS); IPR001680 (PROSITE_PROFILES); IPR001680 (PROSITE_PROFILES); IPR017986 (PROSITE_PROFILES); IPR001680 (PROSITE_PROFILES); IPR017986 (SUPERFAMILY)                                                                                                                                                                                                                                                                                                                   |
| 2329 | c43157_g1_i1_len_732_path_710_0_731_1    | 20 | basement membrane-specific heparan sulfate proteoglycan core protein isoform x13                | 244 | 1.43E-67  | 65.10% | 0.114 | IPR018031 (SMART); G3DSA:2.10.25.10 (GENE3D); IPR000034 (PFAM); PTHR10574:SF252 (PANTHER); PTHR10574 (PANTHER); IPR000034 (PROSITE_PROFILES)                                                                                                                                                                                                                                                                                                                                                                                                                                                                                                                            |
| 2330 | c43182_g2_i1_len_565_path_829_0_564_0    | 11 | krueppel-like factor 13                                                                         | 189 | 1.37E-12  | 62.70% | 0.101 | IPR015880 (SMART); PF13894 (PFAM); IPR013087 (G3DSA:3.30.160.GENE3D); IPR013087 (G3DSA:3.30.160.GENE3D); IPR007087 (PFAM); PTHR24409 (PANTHER); IPR007087 (PROSITE_PATTERNS); IPR007087 (PROSITE_PATTERNS); CYTOPLASMIC_DOMAIN (PHOBIUS); CYTOPLASMIC_DOMAIN (PHOBIUS); NON_CYTOPLASMIC_DOMAIN (PHOBIUS); TRANSMEMBRANE (PHOBIUS); IPR007087 (PROSITE_PROFILES); IPR007087 (PROSITE_PROFILES); SSF57667 (SUPERFAMILY)                                                                                                                                                                                                                                                   |
| 2331 | c43200_g1_i1_len_659_path_1_0_658_4      | 59 | apolipoprotein d-like                                                                           | 220 | 4.52E-34  | 56.60% | 0.21  | IPR000566 (PFAM); IPR012674 (G3DSA:2.40.128.GENE3D); PTHR10612:SF7 (PANTHER); PTHR10612 (PANTHER); NON_CYTOPLASMIC_DOMAIN (PHOBIUS); CYTOPLASMIC_DOMAIN (PHOBIUS); TRANSMEMBRANE (PHOBIUS); IPR011038 (SUPERFAMILY)                                                                                                                                                                                                                                                                                                                                                                                                                                                     |
| 2332 | c43208_g1_i1_len_414_path_1_0_413_0      | 8  | dorsal-ventral patterning protein partial                                                       | 138 | 3.25E-31  | 62.20% | 0.21  | IPR001007 (SMART); IPR001007 (PFAM); PTHR11339 (PANTHER); PTHR11339:SF223 (PANTHER); SSF57603 (SUPERFAMILY)                                                                                                                                                                                                                                                                                                                                                                                                                                                                                                                                                             |

|      |                                          |    |                                                                                        |     |           |        |       |                                                                                                                                                                                                                                                                                                                                                                                                                                                                   |
|------|------------------------------------------|----|----------------------------------------------------------------------------------------|-----|-----------|--------|-------|-------------------------------------------------------------------------------------------------------------------------------------------------------------------------------------------------------------------------------------------------------------------------------------------------------------------------------------------------------------------------------------------------------------------------------------------------------------------|
| 2333 | c43222_g1_i1_len_400_path_23_0_399_5     | 6  | hyaluronidase-1 isoform x2                                                             | 133 | 2.60E-12  | 61.90% | 0.1   | IPR013785 (G3DSA:3.20.20.GENE3D); IPR018155 (PFAM); PTHR11769:SF8 (PANTHER); IPR018155 (PANTHER); IPR017853 (SUPERFAMILY)                                                                                                                                                                                                                                                                                                                                         |
| 2334 | c43248_g1_i1_len_1603_path_1_0_1602_1    | 67 | acyl- -binding domain-containing protein 5 isoform x2                                  | 534 | 2.76E-49  | 44.10% | 0.171 | Coil (COILS); IPR000582 (PRINTS); IPR000582 (PFAM); IPR014352 (G3DSA:1.20.80.GENE3D); PTHR23310:SF14 (PANTHER); PTHR23310 (PANTHER); CYTOPLASMIC_DOMAIN (PHOBIUS); TRANSMEMBRANE (PHOBIUS); NON_CYTOPLASMIC_DOMAIN (PHOBIUS); IPR000582 (PROSITE_PROFILES); IPR000582 (SUPERFAMILY); TMhelix (TMHMM)                                                                                                                                                              |
| 2335 | c43297_g1_i1_len_639_path_617_0_638_5    | 19 | sortilin-related receptor-like                                                         | 213 | 6.25E-12  | 45.60% | 0.109 | IPR002172 (PRINTS); IPR002172 (SMART); IPR002172 (PFAM); IPR002172 (G3DSA:4.10.400.GENE3D); PTHR10529 (PANTHER); IPR023415 (PROSITE_PATTERNS); IPR002172 (PROSITE_PROFILES); IPR002172 (PROSITE_PROFILES); IPR002172 (SUPERFAMILY); IPR002172 (SUPERFAMILY)                                                                                                                                                                                                       |
| 2336 | c43299_g1_i1_len_501_path_1_0_500_3      | 10 | achain crystal structure of engineered northeast structural genomics consortium target | 167 | 7.06E-12  | 61.20% | 0.106 | IPR002110 (SMART); IPR020683 (G3DSA:1.25.40.GENE3D); IPR020683 (PFAM); PTHR24193 (PANTHER); IPR020683 (PROSITE_PROFILES); IPR002110 (PROSITE_PROFILES); IPR002110 (PROSITE_PROFILES); IPR020683 (SUPERFAMILY)                                                                                                                                                                                                                                                     |
| 2337 | c43331_g1_i1_len_279_path_1_0_278_4      | 4  | transmembrane protein 2                                                                | 93  | 2.36E-07  | 72.00% | 0.111 | PTHR12277 (PANTHER); PTHR12277:SF48 (PANTHER)                                                                                                                                                                                                                                                                                                                                                                                                                     |
| 2338 | c43371_g1_i1_len_694_path_1_0_693_3      | 14 | ecto-nox disulfide-thiol exchanger 2-like isoform x4                                   | 232 | 5.54E-06  | 53.00% | 0.1   | PTHR16001 (PANTHER)                                                                                                                                                                                                                                                                                                                                                                                                                                               |
| 2339 | c43384_g1_i1_len_355_path_333_0_354_0    | 10 | retinol dehydrogenase 14                                                               | 119 | 2.94E-25  | 78.20% | 0.157 | IPR002198 (PFAM); IPR016040 (G3DSA:3.40.50.GENE3D); PTHR24320 (PANTHER); PTHR24320:SF36 (PANTHER); NON_CYTOPLASMIC_DOMAIN (PHOBIUS); TRANSMEMBRANE (PHOBIUS); CYTOPLASMIC_DOMAIN (PHOBIUS); SSF51735 (SUPERFAMILY); TMhelix (TMHMM)                                                                                                                                                                                                                               |
| 2341 | c4350_g1_i1_len_1025_path_1003_0_1024_4  | 58 | copper chaperone for superoxide dismutase                                              | 342 | 3.07E-113 | 77.00% | 0.111 | IPR001424 (PRINTS); G3DSA:3.30.70.100 (GENE3D); IPR001424 (G3DSA:2.60.40.GENE3D); IPR006121 (PFAM); IPR001424 (PFAM); PTHR10003 (PANTHER); IPR018152 (PROSITE_PATTERNS); TRANSMEMBRANE (PHOBIUS); NON_CYTOPLASMIC_DOMAIN (PHOBIUS); CYTOPLASMIC_DOMAIN (PHOBIUS); IPR006121 (PROSITE_PROFILES); IPR001424 (SUPERFAMILY); IPR006121 (SUPERFAMILY)                                                                                                                  |
| 2340 | c43503_g1_i1_len_293_path_271_0_292_3    | 4  | insulin-like growth factor-binding protein complex acid labile subunit                 | 98  | 1.99E-37  | 73.70% | 0.115 | IPR000483 (SMART); G3DSA:3.80.10.10 (GENE3D); PTHR24365 (PANTHER); SSF52058 (SUPERFAMILY)                                                                                                                                                                                                                                                                                                                                                                         |
| 2342 | c43522_g1_i1_len_344_path_1_0_343_0      | 6  | carboxypeptidase b-like                                                                | 115 | 1.45E-27  | 66.30% | 0.102 | IPR000834 (PRINTS); IPR000834 (PFAM); G3DSA:3.40.630.10 (GENE3D); PTHR11705 (PANTHER); IPR000834 (PROSITE_PATTERNS); SSF53187 (SUPERFAMILY)                                                                                                                                                                                                                                                                                                                       |
| 2343 | c43546_g1_i1_len_511_path_1_0_510_3      | 9  | laminin a                                                                              | 171 | 3.24E-76  | 80.30% | 0.105 | PR00011 (PRINTS); IPR002049 (SMART); IPR002049 (PFAM); G3DSA:2.10.25.10 (GENE3D); G3DSA:2.10.25.10 (GENE3D); PTHR10574:SF231 (PANTHER); PTHR10574 (PANTHER); IPR002049 (PROSITE_PATTERNS); IPR002049 (PROSITE_PATTERNS); IPR002049 (PROSITE_PATTERNS); IPR002049 (PROSITE_PATTERNS); IPR002049 (PROSITE_PROFILES); IPR002049 (PROSITE_PROFILES); IPR002049 (PROSITE_PROFILES); SSF57196 (SUPERFAMILY); SSF57196 (SUPERFAMILY); SSF57196 (SUPERFAMILY)             |
| 2344 | c43555_g1_i1_len_388_path_366_0_387_5    | 7  | dehydrogenase reductase sdr family protein 7-like isoform x1                           | 129 | 3.32E-23  | 68.90% | 0.262 | IPR002198 (PFAM); IPR016040 (G3DSA:3.40.50.GENE3D); PTHR24322:SF308 (PANTHER); PTHR24322 (PANTHER); NON_CYTOPLASMIC_DOMAIN (PHOBIUS); TRANSMEMBRANE (PHOBIUS); CYTOPLASMIC_DOMAIN (PHOBIUS); SSF51735 (SUPERFAMILY); TMhelix (TMHMM)                                                                                                                                                                                                                              |
| 2345 | c43556_g1_i1_len_901_path_1_0_900_1      | 63 | twitchin isoform x4                                                                    | 300 | 2.07E-141 | 82.60% | 0.108 | PR00014 (PRINTS); IPR003961 (SMART); IPR013783 (G3DSA:2.60.40.GENE3D); IPR013098 (PFAM); IPR013783 (G3DSA:2.60.40.GENE3D); IPR003961 (PFAM); IPR013783 (G3DSA:2.60.40.GENE3D); IPR013783 (G3DSA:2.60.40.GENE3D); PTHR19897:SF155 (PANTHER); PTHR19897 (PANTHER); IPR003961 (PROSITE_PROFILES); IPR003961 (PROSITE_PROFILES); IPR003961 (PROSITE_PROFILES); IPR003961 (PROSITE_PROFILES); IPR003961 (SUPERFAMILY); SSF48726 (SUPERFAMILY); IPR003961 (SUPERFAMILY) |
| 2346 | c43665_g1_i1_len_1374_path_1352_0_1373_1 | 54 | map kinase-activated protein kinase 2                                                  | 458 | 0         | 85.80% | 0.115 | IPR002290 (SMART); G3DSA:3.30.200.20 (GENE3D); G3DSA:1.10.510.10 (GENE3D); IPR027442 (G3DSA:4.10.1170.GENE3D); IPR000719 (PFAM); PTHR24349:SF64 (PANTHER); PTHR24349 (PANTHER); IPR017441 (PROSITE_PATTERNS); IPR008271 (PROSITE_PATTERNS); NON_CYTOPLASMIC_DOMAIN (PHOBIUS); TRANSMEMBRANE (PHOBIUS); CYTOPLASMIC_DOMAIN (PHOBIUS); IPR000719 (PROSITE_PROFILES); IPR011009 (SUPERFAMILY)                                                                        |

|      |                                          |     |                                                     |     |           |        |        |                                                                                                                                                                                                                                                                                                                                                                                                                                                                                                                                                                                                                                                                                            |
|------|------------------------------------------|-----|-----------------------------------------------------|-----|-----------|--------|--------|--------------------------------------------------------------------------------------------------------------------------------------------------------------------------------------------------------------------------------------------------------------------------------------------------------------------------------------------------------------------------------------------------------------------------------------------------------------------------------------------------------------------------------------------------------------------------------------------------------------------------------------------------------------------------------------------|
| 2347 | c43688_g1_i1_len_1297_path_1_0_1296_4    | 43  | papilin isoform x2                                  | 432 | 3.82E-138 | 65.10% | 0.119  | IPR002223 (PRINTS); IPR002223 (SMART); IPR002223 (G3DSA:4.10.410.GENE3D); IPR002223 (G3DSA:4.10.410.GENE3D); IPR002223 (G3DSA:4.10.410.GENE3D); IPR002223 (G3DSA:4.10.410.GENE3D); IPR002223 (PFAM); PTHR10083 (PANTHER); IPR020901 (PROSITE_PATTERNS); IPR020901 (PROSITE_PATTERNS); IPR020901 (PROSITE_PATTERNS); IPR020901 (PROSITE_PATTERNS); IPR020901 (PROSITE_PATTERNS); IPR002223 (PROSITE_PROFILES); IPR002223 (PROSITE_PROFILES); IPR002223 (PROSITE_PROFILES); IPR002223 (PROSITE_PROFILES); IPR002223 (PROSITE_PROFILES); IPR002223 (SUPERFAMILY); IPR002223 (SUPERFAMILY); IPR002223 (SUPERFAMILY); IPR002223 (SUPERFAMILY); IPR002223 (SUPERFAMILY); IPR002223 (SUPERFAMILY) |
| 2348 | c43701_g1_i1_len_306_path_1_0_305_5      | 4   | leucine-rich repeat-containing protein partial      | 102 | 6.92E-28  | 72.00% | 0.096  | IPR003591 (SMART); IPR001611 (PFAM); IPR001611 (PFAM); G3DSA:3.80.10.10 (GENE3D); PTHR23155:SF424 (PANTHER); PTHR23155 (PANTHER); IPR001611 (PROSITE_PROFILES); IPR001611 (PROSITE_PROFILES); IPR001611 (PROSITE_PROFILES); IPR001611 (PROSITE_PROFILES); IPR001611 (PROSITE_PROFILES); SSF52075 (SUPERFAMILY)                                                                                                                                                                                                                                                                                                                                                                             |
| 2349 | c43720_g1_i1_len_325_path_1_0_324_0      | 10  | slit homolog 2                                      | 109 | 1.79E-39  | 77.50% | 0.102  | IPR001611 (PFAM); IPR001611 (PFAM); G3DSA:3.80.10.10 (GENE3D); PTHR24365:SF249 (PANTHER); PTHR24365 (PANTHER); SSF52075 (SUPERFAMILY)                                                                                                                                                                                                                                                                                                                                                                                                                                                                                                                                                      |
| 2350 | c43725_g1_i1_len_378_path_1_0_377_4      | 6   | dbh-like monooxygenase protein 1                    | 126 | 1.81E-16  | 66.30% | 0.860Y | IPR005018 (PFAM); PTHR10157:SF23 (PANTHER); IPR000945 (PANTHER); SIGNAL_PEPTIDE (PHOBIUS); SIGNAL_PEPTIDE_N_REGION (PHOBIUS); SIGNAL_PEPTIDE_C_REGION (PHOBIUS); SIGNAL_PEPTIDE_H_REGION (PHOBIUS); NON_CYTOPLASMIC_DOMAIN (PHOBIUS); IPR005018 (PROSITE_PROFILES); SignalP-TM (SIGNALP_GRAM_NEGATIVE); SignalP-TM (SIGNALP_GRAM_POSITIVE); SignalP-noTM (SIGNALP_EUK); TMhelix (TMHMM)                                                                                                                                                                                                                                                                                                    |
| 2351 | c43795_g1_i1_len_1185_path_1163_0_1184_1 | 34  | leucine-rich transmembrane                          | 395 | 3.41E-53  | 52.00% | 0.113  | Coil (COILS); IPR000483 (SMART); G3DSA:3.80.10.10 (GENE3D); TRANSMEMBRANE (PHOBIUS); NON_CYTOPLASMIC_DOMAIN (PHOBIUS); CYTOPLASMIC_DOMAIN (PHOBIUS); SSF52058 (SUPERFAMILY); TMhelix (TMHMM)                                                                                                                                                                                                                                                                                                                                                                                                                                                                                               |
| 2352 | c43844_g1_i1_len_563_path_541_0_562_2    | 17  | endo-b- -glucanase                                  | 187 | 3.16E-62  | 76.50% | 0.163  | IPR001701 (PFAM); IPR012341 (G3DSA:1.50.10.GENE3D); PTHR22298:SF17 (PANTHER); PTHR22298 (PANTHER); IPR018221 (PROSITE_PATTERNS); IPR008928 (SUPERFAMILY)                                                                                                                                                                                                                                                                                                                                                                                                                                                                                                                                   |
| 2353 | c43910_g1_i1_len_2072_path_10_0_2071_5   | 155 | ankyrin repeat and mynd domain-containing protein 2 | 690 | 7.14E-139 | 68.20% | 0.099  | Coil (COILS); Coil (COILS); IPR002110 (SMART); IPR002893 (PFAM); IPR020683 (PFAM); IPR020683 (G3DSA:1.25.40.GENE3D); PTHR24150 (PANTHER); IPR002893 (PROSITE_PATTERNS); TRANSMEMBRANE (PHOBIUS); NON_CYTOPLASMIC_DOMAIN (PHOBIUS); CYTOPLASMIC_DOMAIN (PHOBIUS); IPR002110 (PROSITE_PROFILES); IPR002893 (PROSITE_PROFILES); IPR020683 (PROSITE_PROFILES); IPR002110 (PROSITE_PROFILES); SSF144232 (SUPERFAMILY); IPR020683 (SUPERFAMILY); TMhelix (TMHMM)                                                                                                                                                                                                                                 |
| 2354 | c43929_g1_i1_len_292_path_270_0_291_0    | 4   | zinc finger protein 345                             | 98  | 1.39E-15  | 58.60% | 0.1    | IPR015880 (SMART); PF13465 (PFAM); IPR013087 (G3DSA:3.30.160.GENE3D); PTHR24409 (PANTHER); PTHR24409:SF13 (PANTHER); IPR007087 (PROSITE_PATTERNS); IPR007087 (PROSITE_PATTERNS); IPR007087 (PROSITE_PROFILES); IPR007087 (PROSITE_PROFILES); SSF57667 (SUPERFAMILY); SSF57667 (SUPERFAMILY)                                                                                                                                                                                                                                                                                                                                                                                                |
| 2355 | c43994_g1_i1_len_466_path_1_0_465_3      | 6   | wd repeat and socs box-containing protein partial   | 156 | 2.03E-55  | 71.00% | 0.152  | IPR020472 (PRINTS); IPR001680 (SMART); IPR001680 (PFAM); IPR015943 (G3DSA:2.130.10.GENE3D); PTHR15622:SF2 (PANTHER); PTHR15622 (PANTHER); IPR019775 (PROSITE_PATTERNS); IPR019775 (PROSITE_PATTERNS); IPR001680 (PROSITE_PROFILES); IPR001680 (PROSITE_PROFILES); IPR017986 (PROSITE_PROFILES); IPR001680 (PROSITE_PROFILES); IPR017986 (SUPERFAMILY)                                                                                                                                                                                                                                                                                                                                      |
| 2356 | c44071_g1_i1_len_303_path_281_0_302_4    | 25  | zinc finger protein 235-like                        | 101 | 2.49E-22  | 66.90% | 0.101  | IPR015880 (SMART); PF13465 (PFAM); IPR013087 (G3DSA:3.30.160.GENE3D); IPR007087 (PFAM); IPR013087 (G3DSA:3.30.160.GENE3D); IPR013087 (G3DSA:3.30.160.GENE3D); PTHR24409 (PANTHER); IPR007087 (PROSITE_PATTERNS); IPR007087 (PROSITE_PATTERNS); IPR007087 (PROSITE_PROFILES); IPR007087 (PROSITE_PROFILES); IPR007087 (PROSITE_PROFILES); SSF57667 (SUPERFAMILY); SSF57667 (SUPERFAMILY)                                                                                                                                                                                                                                                                                                    |
| 2357 | c44099_g1_i1_len_1651_path_1629_0_1650_2 | 69  | tyrosine-protein kinase abl                         | 550 | 1.98E-133 | 59.30% | 0.148  | IPR001245 (PFAM); G3DSA:1.10.510.10 (GENE3D); PTHR24418 (PANTHER); PTHR24418:SF87 (PANTHER); IPR000719 (PROSITE_PROFILES); IPR011009 (SUPERFAMILY)                                                                                                                                                                                                                                                                                                                                                                                                                                                                                                                                         |



|      |                                                                     |     |                                                              |     |           |        |         |                                                                                                                                                                                                                                                                                                                                               |
|------|---------------------------------------------------------------------|-----|--------------------------------------------------------------|-----|-----------|--------|---------|-----------------------------------------------------------------------------------------------------------------------------------------------------------------------------------------------------------------------------------------------------------------------------------------------------------------------------------------------|
| 2358 | c44114_g1_i1_len_1258_path_1236_0_1257_1                            | 146 | glutaminy-peptide cyclotransferase-like                      | 414 | 6.44E-116 | 68.90% | 0.188   | G3DSA:3.40.630.10 (GENE3D); IPR007484 (PFAM); PTHR12283 (PANTHER); CYTOPLASMIC_DOMAIN (PHOBIUS); TRANSMEMBRANE (PHOBIUS); NON_CYTOPLASMIC_DOMAIN (PHOBIUS); SSF53187 (SUPERFAMILY)                                                                                                                                                            |
| 2359 | c44135_g1_i1_len_649_path_1_0_648_3                                 | 29  | acid sphingomyelinase-like phosphodiesterase 3b              | 217 | 3.88E-37  | 61.80% | 0.125   | IPR004843 (PFAM); IPR029052 (G3DSA:3.60.21.GENE3D); PTHR10340:SF14 (PANTHER); PTHR10340 (PANTHER); TRANSMEMBRANE (PHOBIUS); NON_CYTOPLASMIC_DOMAIN (PHOBIUS); CYTOPLASMIC_DOMAIN (PHOBIUS); IPR029052 (SUPERFAMILY); TMhelix (TMHMM)                                                                                                          |
| 2360 | c44167_g1_i1_len_616_path_594_0_615_0                               | 10  | lymphokine-activated killer t-cell-originated protein kinase | 206 | 5.36E-21  | 61.60% | 0.13    | G3DSA:1.10.510.10 (GENE3D); IPR000719 (PFAM); PTHR26266 (PANTHER); PTHR26266:SF76 (PANTHER); IPR000719 (PROSITE_PROFILES); IPR011009 (SUPERFAMILY)                                                                                                                                                                                            |
| 2361 | c44238_g1_i1_len_2719_path_2697_0_2718_2                            | 230 | epithelial chloride channel                                  | 906 | 7.69E-33  | 44.80% | 0.11    | IPR015394 (PFAM); PTHR10579:SF8 (PANTHER); PTHR10579 (PANTHER); CYTOPLASMIC_DOMAIN (PHOBIUS); TRANSMEMBRANE (PHOBIUS); TRANSMEMBRANE (PHOBIUS); NON_CYTOPLASMIC_DOMAIN (PHOBIUS); CYTOPLASMIC_DOMAIN (PHOBIUS); TMhelix (TMHMM)                                                                                                               |
| 2362 | c44309_g1_i1_len_589_path_567_0_588_0                               | 23  | group xiaa secretory phospholipase a2                        | 197 | 1.36E-53  | 62.40% | 0.411 Y | IPR010711 (PFAM); IPR016090 (G3DSA:1.20.90.GENE3D); IPR010711 (PANTHER); PTHR12824:SF8 (PANTHER); IPR013090 (PROSITE_PATTERNS); SIGNAL_PEPTIDE (PHOBIUS); SIGNAL_PEPTIDE_N_REGION (PHOBIUS); NON_CYTOPLASMIC_DOMAIN (PHOBIUS); SIGNAL_PEPTIDE_H_REGION (PHOBIUS); SIGNAL_PEPTIDE_C_REGION (PHOBIUS); IPR016090 (SUPERFAMILY); TMhelix (TMHMM) |
| 2363 | c44331_g1_i1_len_1352_path_1_0_1263_1265_1264_1307_1265_1308_1351_4 | 36  | leucine-rich repeat-containing protein 15                    | 451 | 4.34E-22  | 47.30% | 0.336   | IPR003591 (SMART); G3DSA:3.80.10.10 (GENE3D); IPR001611 (PFAM); PTHR24373 (PANTHER); PTHR24373:SF112 (PANTHER); TRANSMEMBRANE (PHOBIUS); NON_CYTOPLASMIC_DOMAIN (PHOBIUS); NON_CYTOPLASMIC_DOMAIN (PHOBIUS); CYTOPLASMIC_DOMAIN (PHOBIUS); TRANSMEMBRANE (PHOBIUS); SSF52058 (SUPERFAMILY)                                                    |
| 2364 | c44336_g1_i1_len_375_path_1_0_374_5                                 | 12  | heat shock protein partial                                   | 125 | 9.35E-57  | 85.90% | 0.26    | IPR013126 (PRINTS); IPR013126 (PFAM); IPR029047 (G3DSA:2.60.34.GENE3D); PTHR19375:SF142 (PANTHER); PTHR19375 (PANTHER); IPR029047 (SUPERFAMILY)                                                                                                                                                                                               |
| 2365 | c44343_g1_i1_len_339_path_317_0_338_2                               | 7   | signal cub and egf-like domain-containing protein partial    | 113 | 4.63E-22  | 60.30% | 0.111   | IPR000742 (SMART); IPR001881 (SMART); IPR026823 (PFAM); G3DSA:2.10.25.10 (GENE3D); G3DSA:2.10.25.10 (GENE3D); PF14670 (PFAM); PTHR24034 (PANTHER); IPR018097 (PROSITE_PATTERNS); IPR013032 (PROSITE_PATTERNS); IPR000152 (PROSITE_PATTERNS); IPR000152 (PROSITE_PATTERNS); SSF57196 (SUPERFAMILY); SSF57196 (SUPERFAMILY)                     |
| 2366 | c44359_g1_i1_len_269_path_247_0_268_4                               | 4   | serine threonine-protein kinase plk1-like                    | 90  | 2.79E-36  | 76.80% | 0.267   | G3DSA:1.10.510.10 (GENE3D); IPR000719 (PFAM); PTHR24345 (PANTHER); IPR000719 (PROSITE_PROFILES); IPR011009 (SUPERFAMILY)                                                                                                                                                                                                                      |
| 2367 | c44400_g1_i1_len_288_path_119_0_287_0                               | 21  | zinc finger protein 431-like isoform x5                      | 96  | 2.63E-24  | 68.10% | 0.104   | IPR015880 (SMART); PF13465 (PFAM); IPR013087 (G3DSA:3.30.160.GENE3D); IPR013087 (G3DSA:3.30.160.GENE3D); IPR013087 (G3DSA:3.30.160.GENE3D); PTHR24409 (PANTHER); IPR007087 (PROSITE_PATTERNS); IPR007087 (PROSITE_PROFILES); SSF57667 (SUPERFAMILY)                                                                                           |
| 2368 | c44412_g1_i1_len_687_path_665_0_686_1                               | 27  | macrophage mannose receptor 1-like                           | 229 | 8.86E-47  | 54.90% | 0.125   | IPR002352 (PRINTS); IPR001304 (SMART); IPR016186 (G3DSA:3.10.100.GENE3D); IPR016186 (G3DSA:3.10.100.GENE3D); IPR001304 (PFAM); PTHR22803 (PANTHER); PTHR22803:SF16 (PANTHER); IPR018378 (PROSITE_PATTERNS); IPR001304 (PROSITE_PROFILES); IPR001304 (PROSITE_PROFILES); IPR016187 (SUPERFAMILY); IPR016187 (SUPERFAMILY)                      |
| 2369 | c44477_g1_i1_len_201_path_275_0_200_1                               | 4   | cd4-specific ankyrin repeat protein                          | 67  | 3.57E-11  | 66.20% | 0.146   | IPR002110 (PRINTS); IPR002110 (SMART); IPR020683 (G3DSA:1.25.40.GENE3D); IPR020683 (PFAM); PTHR24182 (PANTHER); IPR020683 (PROSITE_PROFILES); IPR002110 (PROSITE_PROFILES); IPR002110 (PROSITE_PROFILES); IPR020683 (SUPERFAMILY)                                                                                                             |
| 2370 | c44537_g1_i1_len_836_path_814_0_835_3                               | 23  | trypsin- partial                                             | 279 | 1.29E-90  | 67.20% | 0.119   | IPR001314 (PRINTS); IPR001254 (SMART); G3DSA:2.40.10.10 (GENE3D); G3DSA:2.40.10.10 (GENE3D); G3DSA:2.40.10.10 (GENE3D); PTHR24258 (PANTHER); PTHR24258:SF4 (PANTHER); IPR018114 (PROSITE_PATTERNS); IPR001254 (PROSITE_PROFILES); IPR009003 (SUPERFAMILY)                                                                                     |
| 2371 | c44550_g1_i1_len_168_path_6_0_167_3                                 | 0   | 70-kda heat shock partial                                    | 56  | 8.68E-25  | 89.90% | 0.199   | IPR013126 (PFAM); IPR029047 (G3DSA:2.60.34.GENE3D); PTHR19375 (PANTHER); PTHR19375:SF156 (PANTHER); IPR029047 (SUPERFAMILY)                                                                                                                                                                                                                   |
| 2372 | c44579_g1_i1_len_242_path_220_0_241_0                               | 4   | bone morphogenetic protein 10                                | 81  | 1.93E-23  | 73.00% | 0.106   | IPR001839 (SMART); IPR029034 (G3DSA:2.10.90.GENE3D); IPR001839 (PFAM); IPR015615 (PANTHER); PTHR11848:SF146 (PANTHER); IPR017948 (PROSITE_PATTERNS); IPR001839 (PROSITE_PROFILES); IPR029034 (SUPERFAMILY)                                                                                                                                    |

|      |                                                       |     |                                                      |     |           |        |         |                                                                                                                                                                                                                                                                                                                                                                                                                                                           |
|------|-------------------------------------------------------|-----|------------------------------------------------------|-----|-----------|--------|---------|-----------------------------------------------------------------------------------------------------------------------------------------------------------------------------------------------------------------------------------------------------------------------------------------------------------------------------------------------------------------------------------------------------------------------------------------------------------|
| 2373 | c44675_g1_i1_len_559_path_537_0_558_3                 | 18  | peroxisomal biogenesis factor 7                      | 187 | 7.77E-83  | 74.00% | 0.102   | IPR020472 (PRINTS); IPR001680 (SMART); IPR015943 (G3DSA:2.130.10.GENE3D); IPR001680 (PFAM); PTHR22850 (PANTHER); PTHR22850:SF98 (PANTHER); IPR019775 (PROSITE_PATTERNS); IPR019775 (PROSITE_PATTERNS); IPR017986 (PROSITE_PROFILES); IPR001680 (PROSITE_PROFILES); IPR001680 (PROSITE_PROFILES); IPR001680 (PROSITE_PROFILES); IPR001680 (PROSITE_PROFILES); IPR017986 (SUPERFAMILY)                                                                      |
| 2374 | c44759_g1_i1_len_531_path_509_0_530_4                 | 18  | peptidyl-prolyl cis-trans isomerase cwc27 homolog    | 177 | 3.19E-91  | 90.70% | 0.113   | IPR002130 (PRINTS); IPR002130 (PFAM); IPR029000 (G3DSA:2.40.100.GENE3D); IPR024936 (PANTHER); PTHR11071:SF152 (PANTHER); IPR020892 (PROSITE_PATTERNS); IPR002130 (PROSITE_PROFILES); IPR029000 (SUPERFAMILY)                                                                                                                                                                                                                                              |
| 2375 | c44800_g1_i1_len_338_path_1_0_337_4                   | 3   | zinc finger protein 227                              | 113 | 1.75E-34  | 70.90% | 0.114   | IPR015880 (SMART); PF13465 (PFAM); IPR013087 (G3DSA:3.30.160.GENE3D); IPR013087 (G3DSA:3.30.160.GENE3D); IPR013087 (G3DSA:3.30.160.GENE3D); PTHR24409 (PANTHER); IPR007087 (PROSITE_PATTERNS); IPR007087 (PROSITE_PATTERNS); IPR007087 (PROSITE_PATTERNS); IPR007087 (PROSITE_PROFILES); IPR007087 (PROSITE_PROFILES); IPR007087 (PROSITE_PROFILES); IPR007087 (PROSITE_PROFILES); SSF57667 (SUPERFAMILY); SSF57667 (SUPERFAMILY)                         |
| 2376 | c4482_g1_i1_len_1055_path_1033_0_429_14_63_430_1054_1 | 31  | plexin b                                             | 352 | 1.39E-127 | 85.30% | 0.103   | IPR013548 (PFAM); PTHR22625 (PANTHER); PTHR22625:SF31 (PANTHER); IPR008936 (SUPERFAMILY)                                                                                                                                                                                                                                                                                                                                                                  |
| 2377 | c44863_g1_i1_len_183_path_1_0_182_0                   | 1   | plexin b                                             | 61  | 9.35E-33  | 95.10% | 0.125   | IPR013548 (PFAM); PTHR22625 (PANTHER); IPR008936 (SUPERFAMILY)                                                                                                                                                                                                                                                                                                                                                                                            |
| 2378 | c44907_g1_i1_len_824_path_802_0_823_5                 | 33  | urokinase-type plasminogen activator                 | 274 | 4.12E-49  | 55.20% | 0.203   | IPR001314 (PRINTS); IPR001254 (SMART); G3DSA:2.40.10.10 (GENE3D); IPR001254 (PFAM); G3DSA:2.40.10.10 (GENE3D); PTHR24265 (PANTHER); IPR018114 (PROSITE_PATTERNS); IPR001254 (PROSITE_PROFILES); IPR009003 (SUPERFAMILY)                                                                                                                                                                                                                                   |
| 2379 | c4498_g1_i1_len_996_path_25_0_22_48_23_995_5          | 55  | syntaxin-12                                          | 332 | 2.15E-97  | 72.50% | 0.224   | IPR006011 (SMART); IPR000727 (SMART); PF14523 (PFAM); IPR000727 (PFAM); G3DSA:1.20.58.70 (GENE3D); PTHR19957:SF87 (PANTHER); PTHR19957 (PANTHER); IPR006012 (PROSITE_PATTERNS); TRANSMEMBRANE (PHOBIUS); NON_CYTOPLASMIC_DOMAIN (PHOBIUS); CYTOPLASMIC_DOMAIN (PHOBIUS); IPR000727 (PROSITE_PROFILES); IPR010989 (SUPERFAMILY); TMhelix (TMHMM)                                                                                                           |
| 2380 | c4498_g1_i2_len_1334_path_49_0_360_48_3_61_1333_5     | 88  | syntaxin-12                                          | 444 | 4.34E-96  | 72.40% | 0.224   | IPR000727 (SMART); IPR006011 (SMART); G3DSA:1.20.58.70 (GENE3D); IPR000727 (PFAM); PF14523 (PFAM); PTHR19957 (PANTHER); PTHR19957:SF87 (PANTHER); IPR006012 (PROSITE_PATTERNS); TRANSMEMBRANE (PHOBIUS); CYTOPLASMIC_DOMAIN (PHOBIUS); NON_CYTOPLASMIC_DOMAIN (PHOBIUS); TRANSMEMBRANE (PHOBIUS); NON_CYTOPLASMIC_DOMAIN (PHOBIUS); IPR000727 (PROSITE_PROFILES); IPR010989 (SUPERFAMILY); TMhelix (TMHMM); TMhelix (TMHMM)                               |
| 2381 | c45032_g1_i1_len_480_path_458_0_479_0                 | 10  | wnt-receptor frizzled-like protein variant 2         | 160 | 1.36E-76  | 87.20% | 0.460 Y | IPR020067 (SMART); IPR020067 (G3DSA:1.10.2000.GENE3D); IPR020067 (PFAM); IPR015526 (PANTHER); IPR026561 (PTHR11309:PANTHER); SIGNAL_PEPTIDE (PHOBIUS); SIGNAL_PEPTIDE_N_REGION (PHOBIUS); SIGNAL_PEPTIDE_H_REGION (PHOBIUS); NON_CYTOPLASMIC_DOMAIN (PHOBIUS); SIGNAL_PEPTIDE_C_REGION (PHOBIUS); IPR020067 (PROSITE_PROFILES); SignalP-noTM (SIGNALP_EUK); IPR020067 (SUPERFAMILY)                                                                       |
| 2382 | c45124_g1_i1_len_1417_path_1_0_1416_2                 | 45  | receptor-type tyrosine-protein phosphatase beta-like | 472 | 1.31E-70  | 56.00% | 0.14    | IPR000242 (PRINTS); IPR003595 (SMART); IPR000242 (SMART); IPR013783 (G3DSA:2.60.40.GENE3D); IPR000242 (PFAM); IPR029021 (G3DSA:3.90.190.GENE3D); PTHR19134 (PANTHER); IPR016130 (PROSITE_PATTERNS); NON_CYTOPLASMIC_DOMAIN (PHOBIUS); TRANSMEMBRANE (PHOBIUS); CYTOPLASMIC_DOMAIN (PHOBIUS); IPR000387 (PROSITE_PROFILES); IPR000242 (PROSITE_PROFILES); IPR003961 (PROSITE_PROFILES); IPR003961 (SUPERFAMILY); IPR029021 (SUPERFAMILY); TMhelix (TMHMM)  |
| 2383 | c4522_g1_i1_len_1903_path_5623_0_125_38_69_126_1902_3 | 178 | beta- -glucan-binding protein precursor              | 635 | 3.14E-176 | 60.90% | 0.727 Y | IPR001747 (SMART); IPR001747 (PFAM); IPR015816 (G3DSA:2.30.230.GENE3D); IPR011030 (G3DSA:1.25.10.GENE3D); PTHR23345:SF11 (PANTHER); PTHR23345 (PANTHER); NON_CYTOPLASMIC_DOMAIN (PHOBIUS); SIGNAL_PEPTIDE (PHOBIUS); SIGNAL_PEPTIDE_N_REGION (PHOBIUS); SIGNAL_PEPTIDE_H_REGION (PHOBIUS); SIGNAL_PEPTIDE_C_REGION (PHOBIUS); IPR001747 (PROSITE_PROFILES); SignalP-noTM (SIGNALP_EUK); IPR015819 (SUPERFAMILY); IPR011030 (SUPERFAMILY); TMhelix (TMHMM) |

|      |                                                            |     |                                                                      |     |           |        |        |                                                                                                                                                                                                                                                                                                                                                                                                                                                                                                                                                                                        |
|------|------------------------------------------------------------|-----|----------------------------------------------------------------------|-----|-----------|--------|--------|----------------------------------------------------------------------------------------------------------------------------------------------------------------------------------------------------------------------------------------------------------------------------------------------------------------------------------------------------------------------------------------------------------------------------------------------------------------------------------------------------------------------------------------------------------------------------------------|
| 2384 | c4522_g1_i2_len_2834_path_2812_0_1056_3<br>869_1057_2833_3 | 243 | dlp hdl-bgbp precursor                                               | 945 | 0         | 63.60% | 0.727Y | Coil (COILS); IPR001747 (SMART); IPR015816 (G3DSA:2.30.230.GENE3D); IPR015818 (G3DSA:2.20.80.GENE3D); IPR001747 (PFAM); IPR015255 (PFAM); IPR011030 (G3DSA:1.25.10.GENE3D); IPR015817 (G3DSA:2.20.50.GENE3D); PTHR23345 (PANTHER); PTHR23345:SF11 (PANTHER); SIGNAL_PEPTIDE_C_REGION (PHOBIUS); SIGNAL_PEPTIDE_N_REGION (PHOBIUS); SIGNAL_PEPTIDE (PHOBIUS); SIGNAL_PEPTIDE_H_REGION (PHOBIUS); NON_CYTOPLASMIC_DOMAIN (PHOBIUS); IPR001747 (PROSITE_PROFILES); SignalP-noTM (SIGNALP_EUK); IPR015819 (SUPERFAMILY); IPR015819 (SUPERFAMILY); IPR011030 (SUPERFAMILY); TMhelix (TMHMM) |
| 2385 | c45244_g1_i1_len_337_path_315_0_336_1                      | 6   | hemacentin- partial                                                  | 112 | 5.88E-39  | 75.50% | 0.255  | IPR023413 (G3DSA:2.40.155.GENE3D); IPR006605 (PFAM); PTHR19897:SF158 (PANTHER); PTHR19897 (PANTHER); IPR006605 (PROSITE_PROFILES); IPR009017 (SUPERFAMILY)                                                                                                                                                                                                                                                                                                                                                                                                                             |
| 2386 | c45300_g1_i1_len_340_path_1_0_339_1                        | 9   | laminin subunit gamma- partial                                       | 113 | 2.21E-48  | 78.60% | 0.105  | IPR008211 (SMART); IPR008979 (G3DSA:2.60.120.GENE3D); IPR008211 (PFAM); PTHR10574:SF231 (PANTHER); PTHR10574 (PANTHER); IPR008211 (PROSITE_PROFILES)                                                                                                                                                                                                                                                                                                                                                                                                                                   |
| 2387 | c4542_g1_i1_len_150_path_128_0_149_2                       | 2   | vitellogenin partial                                                 | 50  | 8.67E-17  | 77.80% | 0.099  | IPR001846 (PFAM); IPR001846 (PROSITE_PROFILES)                                                                                                                                                                                                                                                                                                                                                                                                                                                                                                                                         |
| 2388 | c4542_g2_i1_len_405_path_637_0_404_4                       | 14  | vitellogenin partial                                                 | 135 | 5.05E-39  | 65.40% | 0.101  | no IPS match                                                                                                                                                                                                                                                                                                                                                                                                                                                                                                                                                                           |
| 2389 | c45450_g1_i1_len_318_path_296_0_317_3                      | 10  | neuroligin- y-linked isoform x1                                      | 106 | 1.92E-46  | 84.40% | 0.145  | IPR029058 (G3DSA:3.40.50.GENE3D); IPR002018 (PFAM); PTHR11559:SF157 (PANTHER); PTHR11559 (PANTHER); NON_CYTOPLASMIC_DOMAIN (PHOBIUS); CYTOPLASMIC_DOMAIN (PHOBIUS); TRANSMEMBRANE (PHOBIUS); IPR029058 (SUPERFAMILY)                                                                                                                                                                                                                                                                                                                                                                   |
| 2390 | c45473_g1_i1_len_1481_path_1_0_1480_4                      | 92  | #NAME?                                                               | 494 | 0         | 77.20% | 0.115  | IPR001830 (PFAM); IPR023214 (G3DSA:3.40.50.GENE3D); IPR003337 (TIGRFAM); G3DSA:3.40.50.2000 (GENE3D); IPR006379 (TIGRFAM); IPR003337 (PFAM); PTHR10788 (PANTHER); PTHR10788:SF6 (PANTHER); SSF53756 (SUPERFAMILY); IPR023214 (SUPERFAMILY)                                                                                                                                                                                                                                                                                                                                             |
| 2391 | c45484_g1_i1_len_292_path_270_0_291_0                      | 6   | basement membrane-specific heparan sulfate proteoglycan core protein | 98  | 5.14E-32  | 66.10% | 0.106  | IPR013783 (G3DSA:2.60.40.GENE3D); SSF48726 (SUPERFAMILY)                                                                                                                                                                                                                                                                                                                                                                                                                                                                                                                               |
| 2392 | c45485_g1_i1_len_797_path_1_0_796_2                        | 57  | tyrosine-protein kinase dnt-like                                     | 265 | 6.87E-114 | 83.10% | 0.116  | IPR001245 (PRINTS); IPR020635 (SMART); G3DSA:1.10.510.10 (GENE3D); G3DSA:3.30.200.20 (GENE3D); IPR001245 (PFAM); IPR016253 (PIRSF); PTHR24416 (PANTHER); PTHR24416:SF256 (PANTHER); IPR008266 (PROSITE_PATTERNS); IPR000719 (PROSITE_PROFILES); IPR011009 (SUPERFAMILY); TMhelix (TMHMM)                                                                                                                                                                                                                                                                                               |
| 2393 | c45488_g1_i1_len_695_path_1_0_694_1                        | 27  | c-type lectin domain family 4 member g-like isoform x2               | 232 | 1.97E-09  | 46.60% | 0.109  | IPR001304 (SMART); IPR001304 (PFAM); IPR016186 (G3DSA:3.10.100.GENE3D); PTHR22802 (PANTHER); IPR001304 (PROSITE_PROFILES); IPR016187 (SUPERFAMILY)                                                                                                                                                                                                                                                                                                                                                                                                                                     |
| 2394 | c4561_g1_i1_len_414_path_1025_0_169_317_170_413_3          | 14  | trafficking protein particle complex subunit 1-like isoform x3       | 138 | 5.03E-08  | 71.00% | 0.252  | IPR007233 (PFAM)                                                                                                                                                                                                                                                                                                                                                                                                                                                                                                                                                                       |
| 2395 | c4561_g1_i2_len_560_path_1_0_315_317_316_559_3             | 26  | trafficking protein particle complex subunit 1                       | 187 | 9.68E-74  | 87.70% | 0.252  | G3DSA:3.30.450.70 (GENE3D); IPR007233 (PFAM); PTHR23249:SF16 (PANTHER); IPR007233 (PANTHER); IPR011012 (SUPERFAMILY)                                                                                                                                                                                                                                                                                                                                                                                                                                                                   |
| 2396 | c45627_g1_i1_len_405_path_1_0_404_0                        | 14  | neural- partial                                                      | 135 | 3.31E-32  | 59.80% | 0.109  | G3DSA:2.10.25.10 (GENE3D); IPR000742 (PROSITE_PROFILES)                                                                                                                                                                                                                                                                                                                                                                                                                                                                                                                                |
| 2397 | c45684_g1_i1_len_646_path_624_0_645_4                      | 15  | CG4553                                                               | 215 | 3.28E-29  | 62.70% | 0.151  | Coil (COILS); Coil (COILS); IPR010487 (PFAM); PTHR21133 (PANTHER); PTHR21133:SF0 (PANTHER)                                                                                                                                                                                                                                                                                                                                                                                                                                                                                             |
| 2398 | c45751_g1_i1_len_627_path_1_0_626_4                        | 10  | 45 kda calcium-binding protein                                       | 209 | 1.77E-83  | 72.20% | 0.107  | IPR002048 (SMART); IPR011992 (G3DSA:1.10.238.GENE3D); IPR028974 (G3DSA:4.10.1080.GENE3D); IPR011992 (G3DSA:1.10.238.GENE3D); IPR011992 (PFAM); IPR011992 (G3DSA:1.10.238.GENE3D); PF13833 (PFAM); PTHR10827 (PANTHER); IPR027240 (PTHR10827:PANTHER); IPR018247 (PROSITE_PATTERNS); IPR002048 (PROSITE_PROFILES); IPR002048 (PROSITE_PROFILES); IPR002048 (PROSITE_PROFILES); SSF47473 (SUPERFAMILY)                                                                                                                                                                                   |
| 2399 | c45805_g1_i1_len_592_path_570_0_591_3                      | 14  | aldehyde dehydrogenase 16 member a1                                  | 198 | 9.72E-82  | 75.40% | 0.15   | IPR016162 (G3DSA:3.40.605.GENE3D); IPR015590 (PFAM); IPR016163 (G3DSA:3.40.309.GENE3D); PTHR11699 (PANTHER); PTHR11699:SF98 (PANTHER); IPR016161 (SUPERFAMILY); IPR016161 (SUPERFAMILY)                                                                                                                                                                                                                                                                                                                                                                                                |

|      |                                         |     |                                                                      |     |          |        |       |                                                                                                                                                                                                                                                                                                                                                                                                                                                                                                                                                                                                                                                                                                                                                   |
|------|-----------------------------------------|-----|----------------------------------------------------------------------|-----|----------|--------|-------|---------------------------------------------------------------------------------------------------------------------------------------------------------------------------------------------------------------------------------------------------------------------------------------------------------------------------------------------------------------------------------------------------------------------------------------------------------------------------------------------------------------------------------------------------------------------------------------------------------------------------------------------------------------------------------------------------------------------------------------------------|
| 2400 | c4581_g1_i1_len_1977_path_1955_0_1976_1 | 116 | frizzled 4                                                           | 659 | 0        | 72.90% | 0.143 | IPR000539 (PRINTS); IPR020067 (SMART); IPR020067 (PFAM); IPR000539 (PFAM); IPR020067 (G3DSA:1.10.2000.GENE3D); IPR026551 (PTHR11309:PANTHER); IPR015526 (PANTHER); CYTOPLASMIC_DOMAIN (PHOBIUS); TRANSMEMBRANE (PHOBIUS); CYTOPLASMIC_DOMAIN (PHOBIUS); NON_CYTOPLASMIC_DOMAIN (PHOBIUS); CYTOPLASMIC_DOMAIN (PHOBIUS); TRANSMEMBRANE (PHOBIUS); NON_CYTOPLASMIC_DOMAIN (PHOBIUS); TRANSMEMBRANE (PHOBIUS); NON_CYTOPLASMIC_DOMAIN (PHOBIUS); CYTOPLASMIC_DOMAIN (PHOBIUS); TRANSMEMBRANE (PHOBIUS); IPR017981 (PROSITE_PROFILES); IPR020067 (PROSITE_PROFILES); IPR020067 (SUPERFAMILY); TMhelix (TMHMM); TMhelix (TMHMM) |
| 2401 | c45933_g1_i1_len_352_path_1_0_351_4     | 8   | voltage-gated sodium channel                                         | 117 | 1.07E-53 | 82.30% | 0.102 | IPR028814 (PTHR10037:PANTHER); PTHR10037 (PANTHER)                                                                                                                                                                                                                                                                                                                                                                                                                                                                                                                                                                                                                                                                                                |
| 2402 | c45943_g1_i1_len_348_path_1_0_347_1     | 7   | aael005869- partial                                                  | 116 | 1.34E-24 | 60.40% | 0.117 | IPR014784 (G3DSA:2.60.120.GENE3D); PF03712 (PFAM); IPR000945 (PANTHER); IPR014783 (PROSITE_PATTERNS); IPR008977 (SUPERFAMILY)                                                                                                                                                                                                                                                                                                                                                                                                                                                                                                                                                                                                                     |
| 2403 | c46054_g1_i1_len_377_path_355_0_376_0   | 7   | reelin- partial                                                      | 126 | 4.08E-29 | 67.70% | 0.096 | PTHR11841 (PANTHER)                                                                                                                                                                                                                                                                                                                                                                                                                                                                                                                                                                                                                                                                                                                               |
| 2404 | c46146_g1_i1_len_989_path_1_0_988_3     | 44  | tyrosine-protein kinase hopscotch                                    | 330 | 1.29E-90 | 66.00% | 0.152 | IPR001245 (PRINTS); IPR020635 (SMART); G3DSA:1.10.510.10 (GENE3D); IPR001245 (PFAM); G3DSA:3.30.200.20 (GENE3D); PTHR24418 (PANTHER); IPR017441 (PROSITE_PATTERNS); IPR008266 (PROSITE_PATTERNS); IPR000719 (PROSITE_PROFILES); IPR011009 (SUPERFAMILY)                                                                                                                                                                                                                                                                                                                                                                                                                                                                                           |
| 2405 | c46180_g1_i1_len_270_path_1_0_269_4     | 8   | sec14 domain and spectrin repeat-containing protein 1                | 90  | 2.11E-28 | 84.10% | 0.103 | IPR013783 (G3DSA:2.60.40.GENE3D); IPR013098 (PFAM); PTHR19897 (PANTHER); PTHR19897:SF148 (PANTHER); IPR007110 (PROSITE_PROFILES); SSF48726 (SUPERFAMILY)                                                                                                                                                                                                                                                                                                                                                                                                                                                                                                                                                                                          |
| 2406 | c46188_g1_i1_len_1315_path_1_0_1314_5   | 62  | ankyrin repeat protein partial                                       | 438 | 4.62E-24 | 50.30% | 0.103 | IPR002110 (SMART); IPR020683 (G3DSA:1.25.40.GENE3D); IPR020683 (PFAM); PTHR24198 (PANTHER); IPR002110 (PROSITE_PROFILES); IPR002110 (PROSITE_PROFILES); IPR020683 (PROSITE_PROFILES); IPR002110 (PROSITE_PROFILES); IPR020683 (SUPERFAMILY)                                                                                                                                                                                                                                                                                                                                                                                                                                                                                                       |
| 2407 | c46192_g1_i1_len_347_path_325_0_346_1   | 8   | xanthine partial                                                     | 116 | 7.21E-16 | 68.50% | 0.156 | IPR008274 (G3DSA:3.30.365.GENE3D); PTHR11908:SF65 (PANTHER); PTHR11908 (PANTHER); IPR008274 (SUPERFAMILY)                                                                                                                                                                                                                                                                                                                                                                                                                                                                                                                                                                                                                                         |
| 2408 | c46283_g1_i1_len_215_path_232_0_214_4   | 2   | von willebrand factor d and egf domain-containing partial            | 72  | 2.90E-24 | 80.10% | 0.153 | IPR000742 (SMART); G3DSA:2.10.25.10 (GENE3D); IPR013032 (PROSITE_PATTERNS); IPR013032 (PROSITE_PATTERNS); IPR000742 (PROSITE_PROFILES); IPR000742 (PROSITE_PROFILES); SSF57196 (SUPERFAMILY); SSF57196 (SUPERFAMILY)                                                                                                                                                                                                                                                                                                                                                                                                                                                                                                                              |
| 2409 | c46354_g1_i1_len_469_path_1_0_468_1     | 9   | c-type mannose receptor 2-like                                       | 156 | 8.65E-15 | 48.60% | 0.107 | IPR016186 (G3DSA:3.10.100.GENE3D); IPR001304 (PFAM); IPR016186 (G3DSA:3.10.100.GENE3D); PTHR22803 (PANTHER); IPR001304 (PROSITE_PROFILES); IPR001304 (PROSITE_PROFILES); IPR016187 (SUPERFAMILY); IPR016187 (SUPERFAMILY)                                                                                                                                                                                                                                                                                                                                                                                                                                                                                                                         |
| 2410 | c46367_g1_i1_len_629_path_607_0_628_0   | 10  | zinc finger protein 658b-like                                        | 210 | 2.24E-31 | 58.00% | 0.1   | IPR015880 (SMART); IPR013087 (G3DSA:3.30.160.GENE3D); IPR013087 (G3DSA:3.30.160.GENE3D); PF13465 (PFAM); PF13894 (PFAM); IPR013087 (G3DSA:3.30.160.GENE3D); PTHR24409 (PANTHER); IPR007087 (PROSITE_PATTERNS); IPR007087 (PROSITE_PATTERNS); IPR007087 (PROSITE_PATTERNS); IPR007087 (PROSITE_PATTERNS); IPR007087 (PROSITE_PATTERNS); TRANSMEMBRANE (PHOBIUS); CYTOPLASMIC_DOMAIN (PHOBIUS); NON_CYTOPLASMIC_DOMAIN (PHOBIUS); IPR007087 (PROSITE_PROFILES); IPR007087 (PROSITE_PROFILES); IPR007087 (PROSITE_PROFILES); IPR007087 (PROSITE_PROFILES); IPR007087 (PROSITE_PROFILES); SSF57667 (SUPERFAMILY); SSF57667 (SUPERFAMILY); SSF57667 (SUPERFAMILY)                                                                                      |
| 2411 | c46376_g1_i1_len_320_path_1_0_319_3     | 6   | membrane-associated guanylate ww and pdz domain-containing protein 2 | 107 | 2.27E-56 | 85.00% | 0.134 | G3DSA:3.30.63.10 (GENE3D); IPR008145 (PFAM); PTHR10316 (PANTHER); PTHR10316:SF40 (PANTHER); IPR020590 (PROSITE_PATTERNS); IPR008144 (PROSITE_PROFILES); IPR027417 (SUPERFAMILY)                                                                                                                                                                                                                                                                                                                                                                                                                                                                                                                                                                   |
| 2412 | c46386_g1_i1_len_231_path_1_0_230_0     | 7   | chaperone                                                            | 77  | 2.37E-30 | 85.10% | 0.111 | G3DSA:3.30.420.40 (GENE3D); IPR013126 (PFAM); PTHR19375:SF155 (PANTHER); PTHR19375 (PANTHER); SSF53067 (SUPERFAMILY)                                                                                                                                                                                                                                                                                                                                                                                                                                                                                                                                                                                                                              |
| 2413 | c46530_g1_i1_len_801_path_779_0_800_5   | 36  | lactase-phlorizin hydrolase-like                                     | 267 | 2.50E-98 | 69.80% | 0.173 | IPR001360 (PFAM); IPR013781 (G3DSA:3.20.20.GENE3D); IPR001360 (PANTHER); IPR017853 (SUPERFAMILY)                                                                                                                                                                                                                                                                                                                                                                                                                                                                                                                                                                                                                                                  |
| 2414 | c46549_g1_i1_len_431_path_409_0_430_4   | 14  | ---NA---                                                             | 144 |          |        | 0.135 | Coil (COILS); IPR016186 (G3DSA:3.10.100.GENE3D); IPR016187 (SUPERFAMILY)                                                                                                                                                                                                                                                                                                                                                                                                                                                                                                                                                                                                                                                                          |

|      |                                                                    |     |                                                              |     |           |        |         |                                                                                                                                                                                                                                                                                                                                                                                                                                                                                                                                                                                                                                                                                                         |
|------|--------------------------------------------------------------------|-----|--------------------------------------------------------------|-----|-----------|--------|---------|---------------------------------------------------------------------------------------------------------------------------------------------------------------------------------------------------------------------------------------------------------------------------------------------------------------------------------------------------------------------------------------------------------------------------------------------------------------------------------------------------------------------------------------------------------------------------------------------------------------------------------------------------------------------------------------------------------|
| 2415 | c46551_g1_i1_len_1028_path_1006_0_1027_2                           | 32  | plexin-a4                                                    | 342 | 0         | 83.50% | 0.099   | IPR016201 (SMART); IPR015943 (G3DSA:2.130.10.GENE3D); G3DSA:3.30.1680.10 (GENE3D); IPR002165 (PFAM); IPR001627 (PFAM); PTHR22625 (PANTHER); PTHR22625:SF16 (PANTHER); IPR001627 (PROSITE_PROFILES); IPR016201 (SUPERFAMILY); IPR001627 (SUPERFAMILY)                                                                                                                                                                                                                                                                                                                                                                                                                                                    |
| 2416 | c46572_g1_i1_len_282_path_260_0_281_4                              | 4   | laminin beta 1                                               | 94  | 6.58E-27  | 73.70% | 0.117   | Coil (COILS); IPR001800 (SUPERFAMILY)                                                                                                                                                                                                                                                                                                                                                                                                                                                                                                                                                                                                                                                                   |
| 2417 | c4659_g1_i1_len_2081_path_1_0_845_847_8_46_2080_4                  | 231 | uncharacterized threonine-rich gpi-anchored glyco isoform x7 | 694 | 0         | 90.60% | 0.271   | Coil (COILS); IPR002290 (SMART); G3DSA:1.10.510.10 (GENE3D); IPR024678 (PFAM); IPR000719 (PFAM); G3DSA:3.30.200.20 (GENE3D); PTHR13902 (PANTHER); IPR008271 (PROSITE_PATTERNS); IPR000719 (PROSITE_PROFILES); IPR011009 (SUPERFAMILY)                                                                                                                                                                                                                                                                                                                                                                                                                                                                   |
| 2418 | c46668_g1_i1_len_551_path_529_0_550_1                              | 24  | wd repeat-containing protein 5                               | 184 | 8.14E-114 | 98.00% | 0.114   | IPR020472 (PRINTS); IPR001680 (SMART); IPR001680 (PFAM); IPR015943 (G3DSA:2.130.10.GENE3D); PTHR22847 (PANTHER); PTHR22847:SF308 (PANTHER); IPR019775 (PROSITE_PATTERNS); IPR001680 (PROSITE_PROFILES); IPR017986 (PROSITE_PROFILES); IPR001680 (PROSITE_PROFILES); IPR001680 (PROSITE_PROFILES); IPR017986 (SUPERFAMILY)                                                                                                                                                                                                                                                                                                                                                                               |
| 2419 | c46897_g1_i1_len_276_path_1_0_32_34_33_113_34_114_194_34_195_275_5 | 15  | hypothetical protein CAPTEDRAFT_145620                       | 92  | 1.45E-14  | 51.90% | 0.093   | no IPS match                                                                                                                                                                                                                                                                                                                                                                                                                                                                                                                                                                                                                                                                                            |
| 2420 | c46934_g1_i1_len_296_path_1_0_295_2                                | 7   | hemiceitin-2 isoform x2                                      | 98  | 2.16E-14  | 58.80% | 0.115   | IPR003598 (SMART); IPR003599 (SMART); PF13895 (PFAM); IPR013783 (G3DSA:2.60.40.GENE3D); PTHR19897:SF158 (PANTHER); PTHR19897 (PANTHER); IPR007110 (PROSITE_PROFILES); SSF48726 (SUPERFAMILY)                                                                                                                                                                                                                                                                                                                                                                                                                                                                                                            |
| 2421 | c47099_g1_i1_len_757_path_1_0_756_1                                | 32  | carbohydrate sulfotransferase 11-like                        | 252 | 6.91E-16  | 48.00% | 0.405 Y | IPR005331 (PFAM); IPR018011 (PANTHER); PTHR12137:SF29 (PANTHER); TRANSMEMBRANE (PHOBIUS); NON_CYTOPLASMIC_DOMAIN (PHOBIUS); CYTOPLASMIC_DOMAIN (PHOBIUS); TMhelix (TMHMM)                                                                                                                                                                                                                                                                                                                                                                                                                                                                                                                               |
| 2422 | c47191_g1_i1_len_350_path_29_0_349_3                               | 5   | voltage-gated sodium partial                                 | 117 | 1.82E-54  | 92.50% | 0.121   | IPR027359 (G3DSA:1.20.120.GENE3D); IPR005821 (PFAM); PTHR10037 (PANTHER); IPR028814 (PTHR10037:PANTHER); NON_CYTOPLASMIC_DOMAIN (PHOBIUS); TRANSMEMBRANE (PHOBIUS); CYTOPLASMIC_DOMAIN (PHOBIUS); TRANSMEMBRANE (PHOBIUS); TRANSMEMBRANE (PHOBIUS); NON_CYTOPLASMIC_DOMAIN (PHOBIUS); CYTOPLASMIC_DOMAIN (PHOBIUS); SSF81324 (SUPERFAMILY); TMhelix (TMHMM); TMhelix (TMHMM); TMhelix (TMHMM)                                                                                                                                                                                                                                                                                                           |
| 2423 | c47316_g1_i1_len_347_path_325_0_346_4                              | 4   | sodium channel protein para isoform x5                       | 116 | 5.35E-58  | 86.00% | 0.116   | IPR001696 (PRINTS); IPR028814 (PTHR10037:PANTHER); PTHR10037 (PANTHER); CYTOPLASMIC_DOMAIN (PHOBIUS); NON_CYTOPLASMIC_DOMAIN (PHOBIUS); TRANSMEMBRANE (PHOBIUS); TMhelix (TMHMM)                                                                                                                                                                                                                                                                                                                                                                                                                                                                                                                        |
| 2424 | c47494_g1_i1_len_366_path_1_0_365_0                                | 8   | hyaluronidase ph-20                                          | 122 | 7.77E-28  | 66.80% | 0.099   | Coil (COILS); IPR018155 (PRINTS); IPR013785 (G3DSA:3.20.20.GENE3D); IPR018155 (PFAM); PTHR11769:SF8 (PANTHER); IPR018155 (PANTHER); IPR017853 (SUPERFAMILY)                                                                                                                                                                                                                                                                                                                                                                                                                                                                                                                                             |
| 2425 | c47554_g1_i1_len_1583_path_3_0_1582_1                              | 138 | f-box wd repeat-containing protein 7                         | 528 | 0         | 87.90% | 0.102   | IPR020472 (PRINTS); IPR001810 (SMART); IPR001680 (SMART); G3DSA:1.20.1280.50 (GENE3D); IPR001680 (PFAM); IPR015943 (G3DSA:2.130.10.GENE3D); IPR015943 (G3DSA:2.130.10.GENE3D); IPR001810 (PFAM); PTHR22844 (PANTHER); PTHR22844:SF116 (PANTHER); IPR019775 (PROSITE_PATTERNS); IPR019775 (PROSITE_PATTERNS); IPR019775 (PROSITE_PATTERNS); IPR019775 (PROSITE_PATTERNS); IPR019775 (PROSITE_PATTERNS); IPR001680 (PROSITE_PROFILES); IPR001680 (PROSITE_PROFILES); IPR001680 (PROSITE_PROFILES); IPR001680 (PROSITE_PROFILES); IPR001680 (PROSITE_PROFILES); IPR017986 (PROSITE_PROFILES); IPR001810 (PROSITE_PROFILES); IPR001680 (PROSITE_PROFILES); IPR017986 (SUPERFAMILY); IPR001810 (SUPERFAMILY) |
| 2426 | c47779_g1_i1_len_713_path_691_0_712_0                              | 26  | nucleoporin seh1 isoform x2                                  | 238 | 4.75E-140 | 90.60% | 0.105   | IPR001680 (SMART); IPR001680 (PFAM); IPR015943 (G3DSA:2.130.10.GENE3D); PTHR11024 (PANTHER); PTHR11024:SF3 (PANTHER); IPR001680 (PROSITE_PROFILES); IPR017986 (PROSITE_PROFILES); IPR017986 (SUPERFAMILY)                                                                                                                                                                                                                                                                                                                                                                                                                                                                                               |
| 2427 | c47871_g1_i1_len_400_path_378_0_399_1                              | 8   | polypeptide n-acetylgalactosaminyltransferase partial        | 133 | 2.28E-69  | 83.00% | 0.104   | IPR000772 (PFAM); G3DSA:2.80.10.50 (GENE3D); PTHR11675:SF24 (PANTHER); PTHR11675 (PANTHER); IPR000772 (PROSITE_PROFILES); IPR000772 (SUPERFAMILY); IPR029044 (SUPERFAMILY)                                                                                                                                                                                                                                                                                                                                                                                                                                                                                                                              |
| 2428 | c47887_g1_i1_len_340_path_318_0_339_4                              | 4   | 14-3-3 family protein                                        | 113 | 1.68E-40  | 75.60% | 0.115   | IPR000308 (PRINTS); IPR023410 (SMART); G3DSA:1.20.190.20 (GENE3D); IPR023410 (PFAM); IPR000308 (PANTHER); IPR023410 (SUPERFAMILY)                                                                                                                                                                                                                                                                                                                                                                                                                                                                                                                                                                       |
| 2429 | c47985_g1_i1_len_407_path_411_0_406_1                              | 9   | er degradation-enhancing alpha-mannosidase-like 3            | 136 | 6.06E-35  | 90.70% | 0.149   | IPR001382 (PRINTS); IPR001382 (G3DSA:1.50.10.GENE3D); IPR001382 (PFAM); PTHR11742:SF38 (PANTHER); IPR001382 (PANTHER); CYTOPLASMIC_DOMAIN (PHOBIUS); TRANSMEMBRANE (PHOBIUS); NON_CYTOPLASMIC_DOMAIN (PHOBIUS); IPR001382 (SUPERFAMILY)                                                                                                                                                                                                                                                                                                                                                                                                                                                                 |



|      |                                          |     |                                                              |     |           |        |        |                                                                                                                                                                                                                                                                                                                                                                                                                                                                                                                            |
|------|------------------------------------------|-----|--------------------------------------------------------------|-----|-----------|--------|--------|----------------------------------------------------------------------------------------------------------------------------------------------------------------------------------------------------------------------------------------------------------------------------------------------------------------------------------------------------------------------------------------------------------------------------------------------------------------------------------------------------------------------------|
| 2430 | c48007_g1_i1_len_464_path_1_0_463_5      | 6   | xanthine dehydrogenase oxidase                               | 154 | 9.40E-51  | 69.30% | 0.126  | IPR005107 (SMART); G3DSA:3.30.390.50 (GENE3D); IPR005107 (PFAM); PTHR11908:SF32 (PANTHER); PTHR11908 (PANTHER); IPR005107 (SUPERFAMILY)                                                                                                                                                                                                                                                                                                                                                                                    |
| 2431 | c48076_g1_i1_len_473_path_451_0_472_2    | 12  | death-associated protein kinase partial                      | 157 | 2.57E-47  | 83.60% | 0.132  | IPR002290 (SMART); IPR000719 (PFAM); G3DSA:3.30.200.20 (GENE3D); IPR020675 (PANTHER); IPR020676 (PTHR22964:PANTHER); IPR017441 (PROSITE_PATTERNS); IPR000719 (PROSITE_PROFILES); IPR011009 (SUPERFAMILY)                                                                                                                                                                                                                                                                                                                   |
| 2432 | c48128_g1_i1_len_2193_path_2171_0_2192_5 | 263 | glycoside catalytic core                                     | 731 | 5.97E-94  | 53.40% | 0.642Y | Coil (COILS); IPR013781 (G3DSA:3.20.20.GENE3D); IPR001547 (PFAM); PTHR31308 (PANTHER); NON_CYTOPLASMIC_DOMAIN (PHOBIUS); CYTOPLASMIC_DOMAIN (PHOBIUS); SIGNAL_PEPTIDE_H_REGION (PHOBIUS); TRANSMEMBRANE (PHOBIUS); SIGNAL_PEPTIDE (PHOBIUS); SIGNAL_PEPTIDE_C_REGION (PHOBIUS); CYTOPLASMIC_DOMAIN (PHOBIUS); SIGNAL_PEPTIDE_N_REGION (PHOBIUS); TRANSMEMBRANE (PHOBIUS); NON_CYTOPLASMIC_DOMAIN (PHOBIUS); TRANSMEMBRANE (PHOBIUS); SignalP-noTM (SIGNALP_EUK); IPR017853 (SUPERFAMILY); TMhelix (TMHMM); TMhelix (TMHMM) |
| 2433 | c48169_g1_i1_len_978_path_1_0_977_2      | 60  | dnak protein                                                 | 326 | 4.34E-141 | 79.00% | 0.101  | Coil (COILS); Coil (COILS); IPR013126 (PRINTS); IPR013126 (PFAM); IPR029047 (G3DSA:2.60.34.GENE3D); IPR029048 (G3DSA:1.20.1270.GENE3D); G3DSA:3.30.420.40 (GENE3D); PTHR19375 (PANTHER); PTHR19375:SF142 (PANTHER); IPR029047 (SUPERFAMILY); IPR029048 (SUPERFAMILY); SSF53067 (SUPERFAMILY)                                                                                                                                                                                                                               |
| 2434 | c48577_g1_i1_len_900_path_878_0_899_0    | 21  | serine-aspartate repeat protein f                            | 300 | 5.14E-18  | 51.30% | 0.186  | NON_CYTOPLASMIC_DOMAIN (PHOBIUS); CYTOPLASMIC_DOMAIN (PHOBIUS); NON_CYTOPLASMIC_DOMAIN (PHOBIUS); TRANSMEMBRANE (PHOBIUS); TRANSMEMBRANE (PHOBIUS); TMhelix (TMHMM); TMhelix (TMHMM)                                                                                                                                                                                                                                                                                                                                       |
| 2435 | c48577_g1_i1_len_900_path_878_0_899_4    | 21  | aael005189- partial                                          | 300 | 1.38E-96  | 66.00% | 0.099  | IPR003598 (SMART); IPR003599 (SMART); IPR008160 (PFAM); IPR013098 (PFAM); IPR013783 (G3DSA:2.60.40.GENE3D); PTHR19831 (PANTHER); PTHR19831:SF50 (PANTHER); IPR007110 (PROSITE_PROFILES); IPR007110 (PROSITE_PROFILES); SSF48726 (SUPERFAMILY); SSF48726 (SUPERFAMILY)                                                                                                                                                                                                                                                      |
| 2436 | c48631_g1_i1_len_602_path_1_0_601_5      | 20  | mitochondrial cardiolipin hydrolase-like                     | 200 | 1.27E-45  | 72.40% | 0.182  | IPR025202 (PFAM); G3DSA:3.30.870.10 (GENE3D); PTHR21248 (PANTHER); CYTOPLASMIC_DOMAIN (PHOBIUS); CYTOPLASMIC_DOMAIN (PHOBIUS); TRANSMEMBRANE (PHOBIUS); TRANSMEMBRANE (PHOBIUS); NON_CYTOPLASMIC_DOMAIN (PHOBIUS); IPR001736 (PROSITE_PROFILES); SSF56024 (SUPERFAMILY); TMhelix (TMHMM)                                                                                                                                                                                                                                   |
| 2437 | c48685_g1_i1_len_312_path_290_0_311_5    | 4   | interference hedgehog-like                                   | 104 | 5.67E-19  | 60.00% | 0.126  | IPR013098 (PFAM); IPR013783 (G3DSA:2.60.40.GENE3D); PTHR10489 (PANTHER); IPR007110 (PROSITE_PROFILES); SSF48726 (SUPERFAMILY)                                                                                                                                                                                                                                                                                                                                                                                              |
| 2438 | c48691_g1_i1_len_360_path_1_0_359_1      | 6   | carboxypeptidase b                                           | 120 | 4.82E-39  | 67.80% | 0.116  | IPR000834 (PRINTS); IPR000834 (SMART); G3DSA:3.40.630.10 (GENE3D); IPR000834 (PFAM); PTHR11705 (PANTHER); IPR000834 (PROSITE_PATTERNS); SSF53187 (SUPERFAMILY)                                                                                                                                                                                                                                                                                                                                                             |
| 2439 | c48714_g1_i1_len_324_path_302_0_323_4    | 9   | serine threonine-protein kinase sbk1                         | 108 | 3.11E-47  | 80.50% | 0.11   | G3DSA:1.10.510.10 (GENE3D); IPR000719 (PFAM); PTHR24359:SF18 (PANTHER); PTHR24359 (PANTHER); IPR008271 (PROSITE_PATTERNS); IPR000719 (PROSITE_PROFILES); IPR011009 (SUPERFAMILY)                                                                                                                                                                                                                                                                                                                                           |
| 2440 | c48842_g1_i1_len_397_path_455_0_396_0    | 7   | tyrosine-protein kinase src64b                               | 133 | 1.24E-64  | 86.60% | 0.125  | IPR001245 (PRINTS); IPR020635 (SMART); G3DSA:3.30.200.20 (GENE3D); IPR001245 (PFAM); G3DSA:1.10.510.10 (GENE3D); PTHR24418 (PANTHER); IPR008266 (PROSITE_PATTERNS); IPR000719 (PROSITE_PROFILES); IPR011009 (SUPERFAMILY)                                                                                                                                                                                                                                                                                                  |
| 2441 | c49004_g1_i1_len_397_path_1_0_396_1      | 8   | xanthine dehydrogenase oxidase                               | 132 | 5.72E-58  | 79.20% | 0.149  | IPR002888 (G3DSA:1.10.150.GENE3D); IPR002888 (PFAM); IPR012675 (G3DSA:3.10.20.GENE3D); PTHR11908 (PANTHER); PTHR11908:SF65 (PANTHER); IPR002888 (SUPERFAMILY); IPR001041 (SUPERFAMILY)                                                                                                                                                                                                                                                                                                                                     |
| 2442 | c49201_g1_i1_len_323_path_301_0_322_1    | 4   | mitogen-activated protein kinase kinase kinase 15 isoform x1 | 108 | 6.29E-64  | 97.00% | 0.103  | IPR002290 (SMART); IPR000719 (PFAM); G3DSA:1.10.510.10 (GENE3D); PTHR11584:SF371 (PANTHER); PTHR11584 (PANTHER); IPR008271 (PROSITE_PATTERNS); IPR000719 (PROSITE_PROFILES); IPR011009 (SUPERFAMILY)                                                                                                                                                                                                                                                                                                                       |
| 2443 | c49292_g1_i1_len_545_path_523_0_544_2    | 16  | laminin subunit alpha-like                                   | 181 | 2.02E-73  | 74.30% | 0.099  | no IPS match                                                                                                                                                                                                                                                                                                                                                                                                                                                                                                               |
| 2444 | c49306_g1_i1_len_244_path_1_0_243_5      | 4   | chaperone protein                                            | 81  | 5.73E-21  | 74.30% | 0.103  | IPR001623 (SMART); IPR001623 (PFAM); IPR001623 (G3DSA:1.10.287.GENE3D); PTHR24077 (PANTHER); IPR001623 (PROSITE_PROFILES); IPR001623 (SUPERFAMILY)                                                                                                                                                                                                                                                                                                                                                                         |
| 2445 | c49422_g1_i1_len_1533_path_1_0_1532_0    | 87  | adenylate cyclase type partial                               | 511 | 1.23E-27  | 77.00% | 0.256  | IPR001054 (G3DSA:3.30.70.GENE3D); IPR001054 (PFAM); PTHR11920:SF16 (PANTHER); PTHR11920 (PANTHER); IPR018297 (PROSITE_PATTERNS); IPR001054 (PROSITE_PROFILES); IPR029787 (SUPERFAMILY)                                                                                                                                                                                                                                                                                                                                     |
| 2446 | c49731_g1_i1_len_513_path_1_0_512_0      | 9   | aldehyde oxidase                                             | 171 | 8.75E-49  | 70.40% | 0.116  | IPR008274 (G3DSA:3.30.365.GENE3D); IPR008274 (G3DSA:3.30.365.GENE3D); IPR008274 (PFAM); PTHR11908:SF65 (PANTHER); PTHR11908 (PANTHER); IPR008274 (SUPERFAMILY)                                                                                                                                                                                                                                                                                                                                                             |

|      |                                                               |     |                                                                                                                                 |     |           |        |       |                                                                                                                                                                                                                                                                                                                                                                                         |
|------|---------------------------------------------------------------|-----|---------------------------------------------------------------------------------------------------------------------------------|-----|-----------|--------|-------|-----------------------------------------------------------------------------------------------------------------------------------------------------------------------------------------------------------------------------------------------------------------------------------------------------------------------------------------------------------------------------------------|
| 2447 | c49764_g1_i1_len_444_path_422_0_443_3                         | 6   | aminopeptidase n                                                                                                                | 148 | 3.77E-55  | 76.20% | 0.098 | G3DSA:1.10.390.10 (GENE3D); IPR001930 (PANTHER); PTHR11533:SF148 (PANTHER); SSF55486 (SUPERFAMILY)                                                                                                                                                                                                                                                                                      |
| 2448 | c49781_g1_i1_len_596_path_574_0_595_4                         | 19  | neuroendocrine convertase 2                                                                                                     | 199 | 3.75E-125 | 91.00% | 0.102 | IPR015500 (PRINTS); IPR000209 (PFAM); IPR000209 (G3DSA:3.40.50.GENE3D); IPR015500 (PANTHER); PTHR10795:SF11 (PANTHER); IPR022398 (PROSITE_PATTERNS); IPR023827 (PROSITE_PATTERNS); IPR000209 (SUPERFAMILY)                                                                                                                                                                              |
| 2449 | c49830_g1_i1_len_312_path_290_0_311_3                         | 8   | transducin beta-like protein 3                                                                                                  | 104 | 6.40E-33  | 73.90% | 0.17  | IPR001680 (SMART); IPR001680 (PFAM); IPR015943 (G3DSA:2.130.10.GENE3D); PTHR19854 (PANTHER); PTHR19854:SF15 (PANTHER); IPR019775 (PROSITE_PATTERNS); IPR019775 (PROSITE_PATTERNS); IPR001680 (PROSITE_PROFILES); IPR001680 (PROSITE_PROFILES); IPR017986 (PROSITE_PROFILES); IPR017986 (SUPERFAMILY)                                                                                    |
| 2450 | c49944_g1_i1_len_409_path_387_0_408_2                         | 6   | polypeptide n-acetylgalactosaminyltransferase 5 isoform x2                                                                      | 136 | 8.49E-62  | 83.00% | 0.102 | IPR000772 (SMART); IPR000772 (PFAM); G3DSA:2.80.10.50 (GENE3D); PTHR11675:SF39 (PANTHER); PTHR11675 (PANTHER); IPR000772 (PROSITE_PROFILES); IPR000772 (SUPERFAMILY)                                                                                                                                                                                                                    |
| 2451 | c49986_g1_i1_len_233_path_211_0_232_1                         | 3   | chemosensory protein                                                                                                            | 78  | 1.04E-07  | 55.50% | 0.188 | IPR005055 (PFAM); IPR005055 (G3DSA:1.10.2080.GENE3D); IPR005055 (PANTHER); IPR005055 (SUPERFAMILY)                                                                                                                                                                                                                                                                                      |
| 2452 | c50058_g1_i1_len_279_path_257_0_278_4                         | 8   | ankyrin repeat domain-containing protein 54                                                                                     | 93  | 5.32E-32  | 76.90% | 0.109 | IPR002110 (SMART); IPR020683 (PFAM); IPR020683 (G3DSA:1.25.40.GENE3D); PTHR24197:SF33 (PANTHER); PTHR24197 (PANTHER); IPR002110 (PROSITE_PROFILES); IPR002110 (PROSITE_PROFILES); IPR020683 (PROSITE_PROFILES); IPR020683 (SUPERFAMILY)                                                                                                                                                 |
| 2453 | c50194_g1_i1_len_573_path_573_0_572_5                         | 20  | glyceraldehyde-3-phosphate type i family protein                                                                                | 191 | 1.30E-81  | 76.10% | 0.102 | IPR020831 (PRINTS); IPR020828 (SMART); IPR020829 (PFAM); IPR020828 (PFAM); G3DSA:3.30.360.10 (GENE3D); IPR016040 (G3DSA:3.40.50.GENE3D); PTHR10836:SF31 (PANTHER); IPR020831 (PANTHER); IPR020830 (PROSITE_PATTERNS); SSF55347 (SUPERFAMILY); SSF51735 (SUPERFAMILY)                                                                                                                    |
| 2454 | c50227_g1_i1_len_1135_path_1_0_192_194_193_663_194_664_1134_2 | 35  | c protein immunoglobulin-a-binding beta antigen                                                                                 | 378 | 2.43E-14  | 35.60% | 0.125 | no IPS match                                                                                                                                                                                                                                                                                                                                                                            |
| 2455 | c50227_g1_i1_len_1135_path_1_0_192_194_193_663_194_664_1134_3 | 35  | preprotachykinin a                                                                                                              | 379 | 3.50E-48  | 54.60% | 0.103 | no IPS match                                                                                                                                                                                                                                                                                                                                                                            |
| 2457 | c5047_g1_i1_len_151_path_337_0_150_1                          | 3   | serine protease nudel                                                                                                           | 50  | 3.14E-21  | 82.10% | 0.119 | IPR002172 (G3DSA:4.10.400.GENE3D); IPR002172 (SUPERFAMILY)                                                                                                                                                                                                                                                                                                                              |
| 2456 | c50477_g1_i1_len_1174_path_1184_0_1173_2                      | 36  | stromal cell-derived factor 2                                                                                                   | 391 | 3.42E-52  | 77.40% | 0.111 | IPR016093 (SMART); G3DSA:2.80.10.50 (GENE3D); IPR027005 (PANTHER); CYTOPLASMIC_DOMAIN (PHOBIUS); NON_CYTOPLASMIC_DOMAIN (PHOBIUS); TRANSMEMBRANE (PHOBIUS); IPR016093 (PROSITE_PROFILES); IPR016093 (PROSITE_PROFILES); IPR016093 (SUPERFAMILY)                                                                                                                                         |
| 2461 | c506_g1_i1_len_1624_path_53_0_1623_1                          | 152 | periodic tryptophan protein 1 homolog                                                                                           | 541 | 1.43E-151 | 64.20% | 0.121 | IPR020472 (PRINTS); IPR001680 (SMART); IPR001680 (PFAM); IPR015943 (G3DSA:2.130.10.GENE3D); PTHR14091 (PANTHER); IPR019775 (PROSITE_PATTERNS); IPR019775 (PROSITE_PATTERNS); IPR017986 (PROSITE_PROFILES); IPR001680 (PROSITE_PROFILES); IPR001680 (PROSITE_PROFILES); IPR001680 (PROSITE_PROFILES); IPR017986 (SUPERFAMILY)                                                            |
| 2458 | c50616_g1_i1_len_954_path_932_0_953_0                         | 13  | fukutin-related protein                                                                                                         | 318 | 6.97E-107 | 64.20% | 0.275 | IPR007074 (PFAM); PTHR13627:SF25 (PANTHER); PTHR13627 (PANTHER)                                                                                                                                                                                                                                                                                                                         |
| 2460 | c5062_g1_i1_len_481_path_1_0_480_4                            | 11  | low-density lipoprotein receptor-related protein 4-like                                                                         | 160 | 6.37E-06  | 63.00% | 0.11  | IPR002172 (SMART); IPR002172 (PFAM); IPR002172 (G3DSA:4.10.400.GENE3D); IPR002172 (PROSITE_PROFILES); IPR002172 (SUPERFAMILY)                                                                                                                                                                                                                                                           |
| 2459 | c50625_g1_i1_len_324_path_1_0_323_3                           | 6   | zinc finger                                                                                                                     | 108 | 5.40E-44  | 67.40% | 0.147 | IPR015880 (SMART); IPR007087 (PFAM); IPR013087 (G3DSA:3.30.160.GENE3D); PF13465 (PFAM); IPR013087 (G3DSA:3.30.160.GENE3D); IPR013087 (G3DSA:3.30.160.GENE3D); PTHR24409 (PANTHER); IPR007087 (PROSITE_PATTERNS); IPR007087 (PROSITE_PATTERNS); IPR007087 (PROSITE_PROFILES); IPR007087 (PROSITE_PROFILES); SSF57667 (SUPERFAMILY); SSF57667 (SUPERFAMILY)                               |
| 2462 | c50784_g1_i1_len_413_path_1_0_412_0                           | 3   | d chain coupling of remote alternating-access transport mechanisms for protons and substrates in the multidrug efflux pump acrb | 138 | 3.30E-14  | 54.10% | 0.241 | IPR002110 (SMART); IPR020683 (PFAM); IPR020683 (G3DSA:1.25.40.GENE3D); PTHR24193 (PANTHER); IPR002110 (PROSITE_PROFILES); IPR002110 (PROSITE_PROFILES); IPR020683 (PROSITE_PROFILES); IPR020683 (SUPERFAMILY)                                                                                                                                                                           |
| 2463 | c50796_g1_i1_len_331_path_1_0_330_2                           | 10  | zinc finger protein 282                                                                                                         | 110 | 1.31E-19  | 57.10% | 0.125 | IPR015880 (SMART); IPR013087 (G3DSA:3.30.160.GENE3D); IPR013087 (G3DSA:3.30.160.GENE3D); IPR007087 (PFAM); PF13465 (PFAM); IPR013087 (G3DSA:3.30.160.GENE3D); PTHR24409 (PANTHER); IPR007087 (PROSITE_PATTERNS); IPR007087 (PROSITE_PATTERNS); IPR007087 (PROSITE_PROFILES); IPR007087 (PROSITE_PROFILES); IPR007087 (PROSITE_PROFILES); SSF57667 (SUPERFAMILY); SSF57667 (SUPERFAMILY) |

|      |                                                                                                        |    |                                                                       |     |           |        |       |                                                                                                                                                                                                                                                                                                                                                                                                                                                                                                            |
|------|--------------------------------------------------------------------------------------------------------|----|-----------------------------------------------------------------------|-----|-----------|--------|-------|------------------------------------------------------------------------------------------------------------------------------------------------------------------------------------------------------------------------------------------------------------------------------------------------------------------------------------------------------------------------------------------------------------------------------------------------------------------------------------------------------------|
| 2464 | c508_g1_i2_len_758_path_1_0_497_499_498_757_2                                                          | 14 | lipophorin receptor                                                   | 252 | 1.31E-84  | 76.70% | 0.187 | IPR000033 (SMART); G3DSA:2.10.25.10 (GENE3D); IPR011042 (G3DSA:2.120.10.GENE3D); IPR000033 (PFAM); PF14670 (PFAM); PTHR10529:SF208 (PANTHER); PTHR10529 (PANTHER); IPR000033 (PROSITE_PROFILES); IPR000033 (PROSITE_PROFILES); IPR000033 (PROSITE_PROFILES); IPR000033 (PROSITE_PROFILES); SSF57196 (SUPERFAMILY); SSF63825 (SUPERFAMILY); IPR002347 (PRINTS); IPR002198 (PFAM); IPR016040 (G3DSA:3.40.50.GENE3D); PTHR24322:SF247 (PANTHER); PTHR24322 (PANTHER); SSF51735 (SUPERFAMILY); TMhelix (TMHMM) |
| 2465 | c50920_g1_i1_len_337_path_1_0_336_3                                                                    | 5  | hydroxybutyrate dehydrogenase                                         | 113 | 4.64E-40  | 73.20% | 0.107 | Coil (COILS); IPR003137 (PFAM); G3DSA:3.50.30.30 (GENE3D); SSF52025 (SUPERFAMILY)                                                                                                                                                                                                                                                                                                                                                                                                                          |
| 2466 | c50954_g1_i1_len_817_path_795_0_816_1                                                                  | 10 | er degradation-enhancing alpha-mannosidase-like 3                     | 272 | 7.95E-42  | 68.80% | 0.102 | IPR001623 (PRINTS); IPR001623 (SMART); IPR001623 (PFAM); IPR001623 (G3DSA:1.10.287.GENE3D); PTHR24078 (PANTHER); PTHR24078:SF159 (PANTHER); IPR001623 (PROSITE_PROFILES); IPR001623 (SUPERFAMILY)                                                                                                                                                                                                                                                                                                          |
| 2467 | c51108_g1_i1_len_876_path_1_0_875_5                                                                    | 22 | dnaj homolog subfamily c member 11                                    | 292 | 1.54E-137 | 80.90% | 0.103 | G3DSA:2.10.70.10 (GENE3D); SSF57603 (SUPERFAMILY); SSF57603 (SUPERFAMILY)                                                                                                                                                                                                                                                                                                                                                                                                                                  |
| 2468 | c51137_g1_i1_len_642_path_1_0_320_1_321_641_2                                                          | 19 | kielin chordin-like protein                                           | 214 | 6.50E-17  | 41.20% | 0.133 | IPR001254 (PFAM); G3DSA:2.40.10.10 (GENE3D); PTHR24260 (PANTHER); IPR001254 (PROSITE_PROFILES); IPR009003 (SUPERFAMILY)                                                                                                                                                                                                                                                                                                                                                                                    |
| 2469 | c51355_g1_i1_len_279_path_1_0_278_0                                                                    | 8  | serine protease                                                       | 93  | 1.50E-16  | 58.60% | 0.101 | IPR005390 (PRINTS); IPR000276 (PRINTS); IPR000276 (PFAM); G3DSA:1.20.1070.10 (GENE3D); PTHR24243:SF28 (PANTHER); PTHR24243 (PANTHER); IPR000276 (PROSITE_PATTERNS); CYTOPLASMIC_DOMAIN (PHOBIUS); TRANSMEMBRANE (PHOBIUS); NON_CYTOPLASMIC_DOMAIN (PHOBIUS); TRANSMEMBRANE (PHOBIUS); NON_CYTOPLASMIC_DOMAIN (PHOBIUS); IPR017452 (PROSITE_PROFILES); SSF81321 (SUPERFAMILY); TMhelix (TMHMM); TMhelix (TMHMM); TMhelix (TMHMM)                                                                            |
| 2470 | c5141_g2_i1_len_371_path_349_0_370_5                                                                   | 6  | neuromedin-u receptor 1                                               | 123 | 6.55E-64  | 90.70% | 0.21  | IPR002791 (PFAM); PTHR12260:SF1 (PANTHER); PTHR12260 (PANTHER); TRANSMEMBRANE (PHOBIUS); CYTOPLASMIC_DOMAIN (PHOBIUS); NON_CYTOPLASMIC_DOMAIN (PHOBIUS); TMhelix (TMHMM)                                                                                                                                                                                                                                                                                                                                   |
| 2471 | c51469_g1_i1_len_310_path_1_0_309_1                                                                    | 6  | upf0364 protein c6orf211 homolog                                      | 103 | 1.06E-22  | 76.10% | 0.123 | IPR003595 (SMART); IPR000242 (PFAM); IPR029021 (G3DSA:3.90.190.GENE3D); IPR029021 (G3DSA:3.90.190.GENE3D); PTHR19134 (PANTHER); PTHR19134:SF277 (PANTHER); IPR000387 (PROSITE_PROFILES); IPR000242 (PROSITE_PROFILES); IPR029021 (SUPERFAMILY); IPR029021 (SUPERFAMILY)                                                                                                                                                                                                                                    |
| 2472 | c5154_g1_i1_len_357_path_179_0_51_178_5_2_77_114_78_141_178_142_167_114_168_2_31_178_232_257_255_258_2 | 4  | rho gtpase-activating protein 39 isoform x2                           | 119 | 1.09E-07  | 54.00% | 0.232 | IPR003598 (SMART); IPR003599 (SMART); IPR013783 (G3DSA:2.60.40.GENE3D); IPR013098 (PFAM); IPR013783 (G3DSA:2.60.40.GENE3D); PTHR10489 (PANTHER); IPR007110 (PROSITE_PROFILES); IPR007110 (PROSITE_PROFILES); SSF48726 (SUPERFAMILY); SSF48726 (SUPERFAMILY)                                                                                                                                                                                                                                                |
| 2473 | c51642_g1_i1_len_404_path_1_0_403_3                                                                    | 27 | tyrosine-protein phosphatase 69d                                      | 135 | 7.78E-54  | 81.40% | 0.143 | IPR004254 (PANTHER); PTHR20855:SF15 (PANTHER); CYTOPLASMIC_DOMAIN (PHOBIUS); CYTOPLASMIC_DOMAIN (PHOBIUS); TRANSMEMBRANE (PHOBIUS); TRANSMEMBRANE (PHOBIUS); TMhelix (TMHMM); TMhelix (TMHMM)                                                                                                                                                                                                                                                                                                              |
| 2474 | c51692_g1_i1_len_628_path_1_0_627_4                                                                    | 10 | fasciclin- partial                                                    | 209 | 3.81E-20  | 48.60% | 0.22  | IPR004254 (PFAM); IPR004254 (PANTHER); PTHR20855:SF15 (PANTHER); NON_CYTOPLASMIC_DOMAIN (PHOBIUS); CYTOPLASMIC_DOMAIN (PHOBIUS); TRANSMEMBRANE (PHOBIUS); TRANSMEMBRANE (PHOBIUS); TMhelix (TMHMM); TMhelix (TMHMM)                                                                                                                                                                                                                                                                                        |
| 2475 | c5172_g1_i1_len_481_path_1_0_407_1137_4_08_480_5                                                       | 13 | adiponectin receptor protein                                          | 160 | 9.53E-14  | 81.60% | 0.236 | IPR004254 (PFAM); IPR004254 (PANTHER); PTHR20855:SF15 (PANTHER); NON_CYTOPLASMIC_DOMAIN (PHOBIUS); CYTOPLASMIC_DOMAIN (PHOBIUS); TRANSMEMBRANE (PHOBIUS); TRANSMEMBRANE (PHOBIUS); TMhelix (TMHMM); TMhelix (TMHMM)                                                                                                                                                                                                                                                                                        |
| 2476 | c5172_g1_i2_len_543_path_1_0_407_409_40_8_542_4                                                        | 19 | adiponectin receptor protein                                          | 181 | 1.42E-41  | 90.30% | 0.304 | G3DSA:2.20.100.10 (GENE3D); PTHR13723 (PANTHER)                                                                                                                                                                                                                                                                                                                                                                                                                                                            |
| 2477 | c51845_g1_i1_len_291_path_1_0_290_5                                                                    | 4  | a disintegrin and metalloproteinase with thrombospondin motifs 7-like | 97  | 7.62E-42  | 76.70% | 0.113 | IPR013126 (PRINTS); G3DSA:3.30.420.40 (GENE3D); IPR013126 (PFAM); G3DSA:3.30.30.30 (GENE3D); PTHR19375 (PANTHER); PTHR19375:SF137 (PANTHER); IPR018181 (PROSITE_PATTERNS); SSF53067 (SUPERFAMILY)                                                                                                                                                                                                                                                                                                          |
| 2478 | c51948_g1_i1_len_275_path_253_0_274_3                                                                  | 6  | dnak protein                                                          | 92  | 1.29E-38  | 88.50% | 0.13  | IPR000209 (PFAM); IPR000209 (G3DSA:3.40.50.GENE3D); IPR015500 (PANTHER); PTHR10795:SF9 (PANTHER); IPR022398 (PROSITE_PATTERNS); IPR000209 (SUPERFAMILY)                                                                                                                                                                                                                                                                                                                                                    |
| 2479 | c51999_g1_i1_len_406_path_384_0_405_0                                                                  | 7  | proprotein convertase subtilisin kexin type 7 isoform x2              | 136 | 2.34E-63  | 82.50% | 0.134 |                                                                                                                                                                                                                                                                                                                                                                                                                                                                                                            |

|      |                                                                                 |     |                                                            |     |           |        |        |                                                                                                                                                                                                                                                                                                                                                                                                                                                                                                                                      |
|------|---------------------------------------------------------------------------------|-----|------------------------------------------------------------|-----|-----------|--------|--------|--------------------------------------------------------------------------------------------------------------------------------------------------------------------------------------------------------------------------------------------------------------------------------------------------------------------------------------------------------------------------------------------------------------------------------------------------------------------------------------------------------------------------------------|
| 2480 | c5201_g1_i1_len_477_path_53_0_20_26_21_227_282_228_248_26_249_455_282_456_476_5 | 23  | polyubiquitin-b-like isoform 1                             | 159 | 1.40E-106 | 99.00% | 0.102  | IPR019956 (PRINTS); IPR000626 (SMART); IPR000626 (PFAM); G3DSA:3.10.20.90 (GENE3D); G3DSA:3.10.20.90 (GENE3D); PTHR10666 (PANTHER); IPR019954 (PROSITE_PATTERNS); IPR019954 (PROSITE_PATTERNS); IPR000626 (PROSITE_PROFILES); IPR000626 (PROSITE_PROFILES); IPR029071 (SUPERFAMILY); IPR029071 (SUPERFAMILY); IPR029071 (SUPERFAMILY)                                                                                                                                                                                                |
| 2481 | c52214_g1_i1_len_347_path_325_0_346_5                                           | 6   | zinc finger protein 708-like                               | 115 | 7.10E-17  | 57.10% | 0.099  | IPR015880 (SMART); PF12874 (PFAM); IPR013087 (G3DSA:3.30.160.GENE3D); IPR013087 (G3DSA:3.30.160.GENE3D); PF13912 (PFAM); IPR007087 (PFAM); PTHR24409 (PANTHER); PTHR24409:SF14 (PANTHER); IPR007087 (PROSITE_PATTERNS); IPR007087 (PROSITE_PATTERNS); IPR007087 (PROSITE_PROFILES); IPR007087 (PROSITE_PROFILES); IPR007087 (PROSITE_PROFILES); IPR007087 (PROSITE_PROFILES); SSF57667 (SUPERFAMILY); SSF57667 (SUPERFAMILY)                                                                                                         |
| 2482 | c52403_g1_i1_len_532_path_1_0_531_3                                             | 14  | slit-like partial                                          | 178 | 4.84E-56  | 60.20% | 0.112  | PR00019 (PRINTS); IPR003591 (SMART); IPR001611 (PFAM); IPR001611 (PFAM); G3DSA:3.80.10.10 (GENE3D); PTHR24365 (PANTHER); IPR001611 (PROSITE_PROFILES); IPR001611 (PROSITE_PROFILES); IPR001611 (PROSITE_PROFILES); IPR001611 (PROSITE_PROFILES); IPR001611 (PROSITE_PROFILES); SSF52058 (SUPERFAMILY)                                                                                                                                                                                                                                |
| 2483 | c52698_g1_i1_len_368_path_346_0_367_0                                           | 6   | zinc finger protein                                        | 123 | 4.23E-25  | 58.50% | 0.123  | IPR015880 (SMART); PF13465 (PFAM); PF13894 (PFAM); IPR013087 (G3DSA:3.30.160.GENE3D); IPR013087 (G3DSA:3.30.160.GENE3D); IPR013087 (G3DSA:3.30.160.GENE3D); IPR013087 (G3DSA:3.30.160.GENE3D); PTHR24409 (PANTHER); IPR007087 (PROSITE_PATTERNS); IPR007087 (PROSITE_PATTERNS); IPR007087 (PROSITE_PROFILES); IPR007087 (PROSITE_PROFILES); IPR007087 (PROSITE_PROFILES); SSF57667 (SUPERFAMILY); SSF57667 (SUPERFAMILY)                                                                                                             |
| 2484 | c52781_g1_i1_len_261_path_1_0_260_1                                             | 5   | adp-ribosylation factor-like protein 4a                    | 87  | 2.20E-41  | 92.30% | 0.163  | IPR006689 (PFAM); IPR027417 (G3DSA:3.40.50.GENE3D); PTHR11711:SF121 (PANTHER); PTHR11711 (PANTHER); IPR027417 (SUPERFAMILY)                                                                                                                                                                                                                                                                                                                                                                                                          |
| 2485 | c52805_g1_i1_len_258_path_236_0_257_4                                           | 4   | aael010835- partial                                        | 86  | 1.42E-48  | 95.50% | 0.104  | IPR001245 (PRINTS); IPR000719 (PFAM); G3DSA:1.10.510.10 (GENE3D); PTHR23257 (PANTHER); IPR027258 (PTHR23257:PANTHER); IPR008271 (PROSITE_PATTERNS); IPR000719 (PROSITE_PROFILES); IPR011009 (SUPERFAMILY)                                                                                                                                                                                                                                                                                                                            |
| 2486 | c53028_g1_i1_len_340_path_1_0_339_1                                             | 11  | zonadhesion-like partial                                   | 113 | 1.71E-11  | 51.20% | 0.113  | IPR000998 (PFAM); PTHR23282:SF75 (PANTHER); PTHR23282 (PANTHER); CYTOPLASMIC_DOMAIN (PHOBIUS); TRANSMEMBRANE (PHOBIUS); NON_CYTOPLASMIC_DOMAIN (PHOBIUS); IPR000998 (PROSITE_PROFILES); IPR013320 (SUPERFAMILY)                                                                                                                                                                                                                                                                                                                      |
| 2487 | c53142_g1_i1_len_429_path_407_0_428_4                                           | 10  | low-density lipoprotein receptor-related protein 4-like    | 143 | 4.90E-11  | 50.20% | 0.13   | IPR002172 (PRINTS); IPR002172 (SMART); IPR002172 (PFAM); IPR002172 (G3DSA:4.10.400.GENE3D); IPR002172 (G3DSA:4.10.400.GENE3D); PTHR10529 (PANTHER); IPR023415 (PROSITE_PATTERNS); IPR002172 (PROSITE_PROFILES); IPR002172 (PROSITE_PROFILES); IPR002172 (SUPERFAMILY); IPR002172 (SUPERFAMILY)                                                                                                                                                                                                                                       |
| 2488 | c53247_g1_i1_len_572_path_1_0_571_4                                             | 32  | carboxypeptidase n subunit 2                               | 191 | 7.38E-33  | 57.40% | 0.2    | IPR003591 (SMART); IPR001611 (PFAM); IPR001611 (PFAM); G3DSA:3.80.10.10 (GENE3D); PTHR24365 (PANTHER); SSF52058 (SUPERFAMILY)                                                                                                                                                                                                                                                                                                                                                                                                        |
| 2489 | c53370_g1_i1_len_343_path_1_0_342_5                                             | 16  | plexin domain-containing protein 2                         | 114 | 1.56E-45  | 82.50% | 0.118  | PTHR13055:SF12 (PANTHER); PTHR13055 (PANTHER)                                                                                                                                                                                                                                                                                                                                                                                                                                                                                        |
| 2490 | c53492_g1_i1_len_823_path_801_0_822_1                                           | 739 | ecdysteroid-regulated 16 kda protein                       | 274 | 1.17E-17  | 54.20% | 0.450Y | IPR003172 (SMART); IPR003172 (G3DSA:2.60.40.GENE3D); IPR003172 (PFAM); PTHR11306 (PANTHER); SignalP-noTM (SIGNALP_EUK); IPR014756 (SUPERFAMILY)                                                                                                                                                                                                                                                                                                                                                                                      |
| 2491 | c53513_g1_i1_len_231_path_1_0_230_0                                             | 2   | uncharacterized mitochondrial protein g00810-like          | 77  | 4.96E-12  | 70.90% | 0.131  | PTHR11439 (PANTHER)                                                                                                                                                                                                                                                                                                                                                                                                                                                                                                                  |
| 2492 | c53564_g1_i1_len_504_path_482_0_503_2                                           | 11  | reticulocalbin-2                                           | 168 | 2.56E-27  | 87.40% | 0.101  | IPR011992 (G3DSA:1.10.238.GENE3D); PTHR10827:SF48 (PANTHER); PTHR10827 (PANTHER); IPR018247 (PROSITE_PATTERNS); IPR002048 (PROSITE_PROFILES); SSF47473 (SUPERFAMILY)                                                                                                                                                                                                                                                                                                                                                                 |
| 2493 | c53650_g1_i1_len_271_path_1_0_270_1                                             | 4   | de-cadherin isoform x1                                     | 90  | 2.65E-32  | 81.40% | 0.099  | IPR002126 (G3DSA:2.60.40.GENE3D); PTHR24026:SF39 (PANTHER); PTHR24026 (PANTHER); IPR002126 (PROSITE_PROFILES); IPR015919 (SUPERFAMILY)                                                                                                                                                                                                                                                                                                                                                                                               |
| 2494 | c5366_g1_i1_len_1794_path_1817_0_1645_3463_1646_1669_3665_1670_1793_0           | 72  | PREDICTED: uncharacterized protein LOC105185459 isoform X3 | 598 | 4.08E-07  | 49.00% | 0.1    | IPR002172 (PRINTS); IPR002172 (SMART); IPR003609 (SMART); IPR002172 (G3DSA:4.10.400.GENE3D); IPR002172 (PFAM); G3DSA:3.50.4.10 (GENE3D); IPR003014 (PFAM); PTHR10529:SF208 (PANTHER); PTHR10529 (PANTHER); IPR023415 (PROSITE_PATTERNS); IPR002172 (PROSITE_PROFILES); IPR002172 (PROSITE_PROFILES); IPR003609 (PROSITE_PROFILES); IPR003609 (PROSITE_PROFILES); IPR003609 (PROSITE_PROFILES); IPR003609 (PROSITE_PROFILES); IPR003609 (PROSITE_PROFILES); IPR002172 (SUPERFAMILY); IPR002172 (SUPERFAMILY); IPR002172 (SUPERFAMILY) |

|      |                                        |    |                                                                          |     |          |        |        |                                                                                                                                                                                                                                                                                                                                                                                                                |
|------|----------------------------------------|----|--------------------------------------------------------------------------|-----|----------|--------|--------|----------------------------------------------------------------------------------------------------------------------------------------------------------------------------------------------------------------------------------------------------------------------------------------------------------------------------------------------------------------------------------------------------------------|
| 2495 | c53721_g1_i1_len_442_path_420_0_441_0  | 16 | low quality protein: sco-spondin                                         | 148 | 1.13E-19 | 52.70% | 0.104  | IPR002172 (PRINTS); IPR002172 (SMART); IPR002172 (PFAM); IPR002172 (G3DSA:4.10.400.GENE3D); IPR002172 (G3DSA:4.10.400.GENE3D); IPR002172 (G3DSA:4.10.400.GENE3D); PTHR10529 (PANTHER); PTHR10529:SF208 (PANTHER); IPR002172 (PROSITE_PROFILES); IPR002172 (PROSITE_PROFILES); IPR002172 (PROSITE_PROFILES); IPR002172 (SUPERFAMILY); IPR002172 (SUPERFAMILY); IPR002172 (SUPERFAMILY); IPR002172 (SUPERFAMILY) |
| 2496 | c53853_g1_i1_len_290_path_1_0_289_3    | 6  | tgf-beta receptor type-1                                                 | 97  | 4.22E-54 | 94.40% | 0.263  | IPR000719 (PFAM); G3DSA:1.10.510.10 (GENE3D); IPR000333 (PANTHER); IPR008271 (PROSITE_PATTERNS); IPR000719 (PROSITE_PROFILES); IPR011009 (SUPERFAMILY)                                                                                                                                                                                                                                                         |
| 2497 | c5402_g2_i1_len_322_path_1_0_321_4     | 8  | angiogenic factor with g patch and fha domains 1-like                    | 107 | 2.29E-16 | 63.00% | 0.127  | no IPS match                                                                                                                                                                                                                                                                                                                                                                                                   |
| 2498 | c5406_g2_i1_len_146_path_211_0_145_2   | 1  | polypeptide n-acetylgalactosaminyltransferase 9                          | 48  | 3.34E-22 | 91.80% | 0.173  | PTHR11675 (PANTHER)                                                                                                                                                                                                                                                                                                                                                                                            |
| 2499 | c54144_g1_i1_len_356_path_334_0_355_3  | 19 | low-density lipoprotein receptor-related protein 2                       | 119 | 1.04E-57 | 85.90% | 0.115  | IPR000033 (SMART); IPR011042 (G3DSA:2.120.10.GENE3D); IPR000033 (PFAM); PTHR10529:SF210 (PANTHER); PTHR10529 (PANTHER); IPR000033 (PROSITE_PROFILES); IPR000033 (PROSITE_PROFILES); IPR000033 (PROSITE_PROFILES); SSF63825 (SUPERFAMILY)                                                                                                                                                                       |
| 2500 | c54183_g1_i1_len_687_path_665_0_686_0  | 18 | serine protease                                                          | 229 | 7.95E-57 | 81.10% | 0.109  | IPR001254 (SMART); G3DSA:2.40.10.10 (GENE3D); IPR001254 (PFAM); PTHR24256 (PANTHER); PTHR24256:SF103 (PANTHER); IPR018114 (PROSITE_PATTERNS); IPR001254 (PROSITE_PROFILES); IPR009003 (SUPERFAMILY)                                                                                                                                                                                                            |
| 2501 | c54206_g1_i1_len_256_path_234_0_255_3  | 4  | vacuolar-sorting protein snf8-like                                       | 86  | 2.20E-22 | 93.00% | 0.176  | Coil (COILS); IPR007286 (PFAM); PTHR12806:SF0 (PANTHER); IPR007286 (PANTHER)                                                                                                                                                                                                                                                                                                                                   |
| 2502 | c54301_g1_i1_len_466_path_444_0_465_4  | 15 | retinol dehydrogenase 11-like                                            | 155 | 8.71E-58 | 71.60% | 0.390Y | IPR002347 (PRINTS); IPR002198 (PFAM); IPR016040 (G3DSA:3.40.50.GENE3D); PTHR24316:SF305 (PANTHER); PTHR24316 (PANTHER); CYTOPLASMIC_DOMAIN (PHOBIUS); NON_CYTOPLASMIC_DOMAIN (PHOBIUS); TRANSMEMBRANE (PHOBIUS); SSF51735 (SUPERFAMILY); TMhelix (TMHMM)                                                                                                                                                       |
| 2503 | c54416_g1_i1_len_256_path_1_0_255_0    | 8  | mam and ldl-receptor class a domain-containing protein 1                 | 86  | 2.62E-13 | 57.90% | 0.102  | IPR000998 (PFAM); IPR002172 (G3DSA:4.10.400.GENE3D); IPR000998 (PROSITE_PROFILES); IPR013320 (SUPERFAMILY)                                                                                                                                                                                                                                                                                                     |
| 2504 | c54527_g1_i1_len_301_path_1_0_300_4    | 8  | ankyrin repeat-containing protein                                        | 100 | 4.91E-56 | 87.80% | 0.175  | IPR002110 (SMART); IPR020683 (G3DSA:1.25.40.GENE3D); IPR020683 (PFAM); PTHR24198 (PANTHER); IPR002110 (PROSITE_PROFILES); IPR020683 (PROSITE_PROFILES); IPR002110 (PROSITE_PROFILES); IPR020683 (SUPERFAMILY)                                                                                                                                                                                                  |
| 2505 | c54538_g1_i1_len_312_path_1_0_311_0    | 10 | zinc finger protein 492-like                                             | 104 | 1.89E-29 | 74.00% | 0.13   | IPR015880 (SMART); IPR013087 (G3DSA:3.30.160.GENE3D); IPR013087 (G3DSA:3.30.160.GENE3D); PF13465 (PFAM); IPR013087 (G3DSA:3.30.160.GENE3D); PTHR24409:SF13 (PANTHER); PTHR24409 (PANTHER); IPR007087 (PROSITE_PATTERNS); IPR007087 (PROSITE_PROFILES); IPR007087 (PROSITE_PROFILES); SSF57667 (SUPERFAMILY)                                                                                                    |
| 2506 | c54741_g1_i1_len_150_path_128_0_149_4  | 2  | chemosensory protein                                                     | 50  | 6.70E-18 | 84.60% | 0.152  | IPR005055 (G3DSA:1.10.2080.GENE3D); IPR005055 (PFAM); IPR005055 (PANTHER); PTHR11257:SF4 (PANTHER); IPR005055 (SUPERFAMILY)                                                                                                                                                                                                                                                                                    |
| 2507 | c5496_g2_i1_len_359_path_553_0_358_2   | 3  | peptidylglycine alpha-hydroxylating monooxygenase                        | 119 | 7.40E-63 | 83.50% | 0.11   | IPR000323 (PFAM); PF03712 (PFAM); IPR014784 (G3DSA:2.60.120.GENE3D); IPR000323 (G3DSA:2.60.120.GENE3D); PTHR10680 (PANTHER); IPR014783 (PROSITE_PATTERNS); IPR008977 (SUPERFAMILY); IPR008977 (SUPERFAMILY)                                                                                                                                                                                                    |
| 2508 | c55149_g1_i1_len_740_path_1_0_739_4    | 10 | low quality protein: de-cadherin                                         | 247 | 2.62E-58 | 63.20% | 0.1    | IPR002126 (PRINTS); IPR002126 (SMART); IPR002126 (G3DSA:2.60.40.GENE3D); IPR002126 (PFAM); IPR002126 (G3DSA:2.60.40.GENE3D); PTHR24027:SF276 (PANTHER); PTHR24027 (PANTHER); IPR002126 (PROSITE_PROFILES); IPR002126 (PROSITE_PROFILES); IPR015919 (SUPERFAMILY); IPR015919 (SUPERFAMILY)                                                                                                                      |
| 2509 | c55870_g1_i1_len_251_path_1_0_250_3    | 2  | von willebrand factor type egf and pentraxin domain-containing protein 1 | 84  | 4.26E-15 | 60.90% | 0.129  | IPR011641 (PFAM); IPR009030 (SUPERFAMILY)                                                                                                                                                                                                                                                                                                                                                                      |
| 2510 | c5589_g2_i1_len_1062_path_743_0_1061_5 | 50 | atrial natriuretic peptide-converting enzyme-like                        | 354 | 2.90E-46 | 61.60% | 0.1    | Coil (COILS); IPR002172 (SMART); IPR020067 (SMART); IPR002172 (G3DSA:4.10.400.GENE3D); IPR020067 (G3DSA:1.10.2000.GENE3D); IPR020067 (PFAM); IPR002172 (PFAM); PTHR10529:SF209 (PANTHER); PTHR10529 (PANTHER); IPR023415 (PROSITE_PATTERNS); IPR002172 (PROSITE_PROFILES); IPR020067 (PROSITE_PROFILES); IPR020067 (SUPERFAMILY); IPR002172 (SUPERFAMILY)                                                      |
| 2511 | c56015_g1_i1_len_363_path_1_0_362_3    | 8  | snare domain containing protein                                          | 121 | 8.01E-18 | 74.80% | 0.164  | Coil (COILS); IPR000727 (SMART); IPR000727 (PFAM); G3DSA:1.20.5.110 (GENE3D); PTHR19957 (PANTHER); IPR028669 (PTHR19957:PANTHER); IPR006012 (PROSITE_PATTERNS); IPR000727 (PROSITE_PROFILES); IPR010989 (SUPERFAMILY)                                                                                                                                                                                          |



|      |                                                     |     |                                                   |     |          |        |         |                                                                                                                                                                                                                                                                                                                                                                                                                                                                                                                                |
|------|-----------------------------------------------------|-----|---------------------------------------------------|-----|----------|--------|---------|--------------------------------------------------------------------------------------------------------------------------------------------------------------------------------------------------------------------------------------------------------------------------------------------------------------------------------------------------------------------------------------------------------------------------------------------------------------------------------------------------------------------------------|
| 2512 | c56015_g1_i1_len_363_path_1_0_362_5                 | 8   | protein isoform partial                           | 121 | 1.22E-08 | 67.80% | 0.106   | G3DSA:1.20.58.70 (GENE3D); IPR010989 (SUPERFAMILY)                                                                                                                                                                                                                                                                                                                                                                                                                                                                             |
| 2513 | c56108_g1_i1_len_361_path_1_0_360_1                 | 4   | glycosyltransferase 1 domain-containing protein 1 | 120 | 1.98E-30 | 74.70% | 0.136   | G3DSA:3.40.50.2000 (GENE3D); IPR001296 (PFAM); PTHR12526:SF331 (PANTHER); PTHR12526 (PANTHER); SSF53756 (SUPERFAMILY)<br>PR00019 (PRINTS); IPR003591 (SMART); SM00364 (SMART); IPR001611 (PFAM); G3DSA:3.80.10.10 (GENE3D); IPR001611 (PFAM); IPR025875 (PFAM); PTHR23155 (PANTHER); IPR027036 (PTHR23155:PANTHER); IPR001611 (PROSITE_PROFILES); IPR001611 (PROSITE_PROFILES); IPR001611 (PROSITE_PROFILES); IPR001611 (PROSITE_PROFILES); IPR001611 (PROSITE_PROFILES); IPR001611 (PROSITE_PROFILES); SSF52058 (SUPERFAMILY) |
| 2514 | c56161_g1_i1_len_408_path_386_0_407_4               | 6   | leucine-rich repeat protein soc-2 homolog         | 136 | 1.04E-72 | 93.10% | 0.213   | IPR002172 (G3DSA:4.10.400.GENE3D); IPR002172 (PFAM); PTHR11177 (PANTHER); PTHR11177:SF136 (PANTHER); IPR002172 (PROSITE_PROFILES); IPR011330 (SUPERFAMILY); IPR002172 (SUPERFAMILY)                                                                                                                                                                                                                                                                                                                                            |
| 2515 | c56357_g1_i1_len_379_path_1_0_378_2                 | 5   | chitin deacetylase 1                              | 126 | 1.59E-78 | 97.90% | 0.103   | IPR015880 (SMART); PF13465 (PFAM); IPR013087 (G3DSA:3.30.160.GENE3D); IPR013087 (G3DSA:3.30.160.GENE3D); PTHR23223 (PANTHER); PTHR23223:SF146 (PANTHER); IPR007087 (PROSITE_PATTERNS); IPR007087 (PROSITE_PROFILES); IPR007087 (PROSITE_PROFILES); SSF57667 (SUPERFAMILY)                                                                                                                                                                                                                                                      |
| 2516 | c56540_g1_i1_len_401_path_379_0_400_1               | 27  | krueppel-like factor 15                           | 134 | 2.71E-23 | 90.90% | 0.103   | IPR000668 (SMART); G3DSA:3.90.70.10 (GENE3D); IPR000668 (PFAM); IPR013128 (PANTHER); PTHR12411:SF287 (PANTHER); SSF54001 (SUPERFAMILY)                                                                                                                                                                                                                                                                                                                                                                                         |
| 2517 | c56629_g1_i1_len_479_path_1_0_478_4                 | 6   | cysteine protease and a protease                  | 160 | 3.49E-41 | 68.30% | 0.134   | IPR001245 (PFAM); G3DSA:1.10.510.10 (GENE3D); PTHR24418 (PANTHER); PTHR24418:SF190 (PANTHER); IPR011009 (SUPERFAMILY)                                                                                                                                                                                                                                                                                                                                                                                                          |
| 2518 | c56730_g1_i1_len_158_path_136_0_157_2               | 1   | tyrosine-protein kinase src42a                    | 52  | 3.49E-29 | 94.60% | 0.104   | IPR000242 (PRINTS); IPR003595 (SMART); IPR029021 (G3DSA:3.90.190.GENE3D); IPR000242 (PFAM); PTHR19134 (PANTHER); IPR016130 (PROSITE_PATTERNS); IPR000387 (PROSITE_PROFILES); IPR000242 (PROSITE_PROFILES); IPR029021 (SUPERFAMILY)                                                                                                                                                                                                                                                                                             |
| 2519 | c56863_g1_i1_len_250_path_228_0_249_1               | 4   | tyrosine-protein phosphatase 10d-like             | 83  | 5.18E-21 | 82.50% | 0.131   | IPR028820 (PTHR10037:PANTHER); PTHR10037 (PANTHER)                                                                                                                                                                                                                                                                                                                                                                                                                                                                             |
| 2520 | c57049_g1_i1_len_359_path_337_0_358_5               | 4   | sodium channel protein 60e-like isoform x7        | 119 | 5.50E-45 | 83.80% | 0.149   | IPR002172 (SMART); IPR002172 (G3DSA:4.10.400.GENE3D); IPR002172 (PROSITE_PROFILES); SignalP-TM (SIGNALP_GRAM_POSITIVE); IPR002172 (SUPERFAMILY)                                                                                                                                                                                                                                                                                                                                                                                |
| 2521 | c57066_g1_i1_len_265_path_243_0_264_4               | 4   | ---NA---                                          | 88  |          |        | 0.105   | PF14828 (PFAM); PTHR11339:SF223 (PANTHER); PTHR11339 (PANTHER)                                                                                                                                                                                                                                                                                                                                                                                                                                                                 |
| 2522 | c57205_g1_i1_len_256_path_1_0_255_3                 | 4   | dorsal-ventral patterning protein sog             | 86  | 2.44E-27 | 76.60% | 0.105   | IPR013783 (G3DSA:2.60.40.GENE3D); IPR013098 (PFAM); PF13895 (PFAM); IPR007110 (PROSITE_PROFILES); SSF48726 (SUPERFAMILY); SSF48726 (SUPERFAMILY)                                                                                                                                                                                                                                                                                                                                                                               |
| 2523 | c57447_g1_i1_len_349_path_327_0_348_4               | 5   | frazzled protein                                  | 116 | 2.60E-08 | 50.30% | 0.106   | IPR015880 (SMART); IPR013087 (G3DSA:3.30.160.GENE3D); PF13465 (PFAM); IPR013087 (G3DSA:3.30.160.GENE3D); PTHR24409:SF14 (PANTHER); PTHR24409 (PANTHER); IPR007087 (PROSITE_PATTERNS); IPR007087 (PROSITE_PROFILES); SSF57667 (SUPERFAMILY)                                                                                                                                                                                                                                                                                     |
| 2524 | c57448_g1_i1_len_267_path_245_0_266_0               | 4   | zinc finger protein 39-like isoform x1            | 89  | 2.56E-13 | 61.40% | 0.103   | IPR003598 (SMART); IPR013098 (PFAM); IPR013783 (G3DSA:2.60.40.GENE3D); IPR013783 (G3DSA:2.60.40.GENE3D); PF13895 (PFAM); PTHR11475:SF58 (PANTHER); PTHR11475 (PANTHER); IPR007110 (PROSITE_PROFILES); SSF48726 (SUPERFAMILY); SSF48726 (SUPERFAMILY)                                                                                                                                                                                                                                                                           |
| 2525 | c57458_g1_i1_len_451_path_1_0_450_4                 | 9   | pdgf vegf receptor                                | 150 | 4.18E-15 | 50.80% | 0.099   | IPR000961 (SMART); IPR002290 (SMART); G3DSA:1.10.510.10 (GENE3D); IPR017892 (PFAM); IPR000719 (PFAM); G3DSA:3.30.200.20 (GENE3D); PTHR24351:SF68 (PANTHER); PTHR24351 (PANTHER); IPR008271 (PROSITE_PATTERNS); IPR017441 (PROSITE_PATTERNS); IPR000719 (PROSITE_PROFILES); IPR000961 (PROSITE_PROFILES); IPR011009 (SUPERFAMILY)                                                                                                                                                                                               |
| 2526 | c57476_g1_i1_len_981_path_959_0_980_3               | 14  | ribosomal protein s6 kinase alpha- partial        | 327 | 0        | 92.10% | 0.141   | Coil (COILS); IPR010326 (PFAM); IPR010326 (PANTHER); PTHR21292:SF1 (PANTHER)                                                                                                                                                                                                                                                                                                                                                                                                                                                   |
| 2527 | c5769_g1_i1_len_2387_path_1_0_1291_1293_1292_2386_1 | 219 | exocyst complex component 3                       | 796 | 0        | 74.20% | 0.103   | IPR019734 (SMART); IPR011990 (G3DSA:1.25.40.GENE3D); IPR013105 (PFAM); PF13414 (PFAM); PTHR24078 (PANTHER); IPR013026 (PROSITE_PROFILES); IPR019734 (PROSITE_PROFILES); IPR019734 (PROSITE_PROFILES); IPR019734 (PROSITE_PROFILES); SignalP-noTM (SIGNALP_EUK); SSF48452 (SUPERFAMILY)                                                                                                                                                                                                                                         |
| 2528 | c58028_g1_i1_len_470_path_448_0_469_2               | 8   | dnaj homolog subfamily c member 3-like            | 156 | 1.70E-51 | 73.10% | 0.452 Y | TRANSMEMBRANE (PHOBIUS); CYTOPLASMIC_DOMAIN (PHOBIUS); NON_CYTOPLASMIC_DOMAIN (PHOBIUS); CYTOPLASMIC_DOMAIN (PHOBIUS); TRANSMEMBRANE (PHOBIUS); TMhelix (TMHMM); TMhelix (TMHMM)                                                                                                                                                                                                                                                                                                                                               |
| 2529 | c58475_g1_i1_len_352_path_1_0_351_0                 | 4   | partner of bursicon                               | 118 | 1.14E-14 | 71.50% | 0.23    |                                                                                                                                                                                                                                                                                                                                                                                                                                                                                                                                |

|      |                                                                      |     |                                                                     |     |           |        |        |                                                                                                                                                                                                                                                                                                                                                                                                                                                                                                |
|------|----------------------------------------------------------------------|-----|---------------------------------------------------------------------|-----|-----------|--------|--------|------------------------------------------------------------------------------------------------------------------------------------------------------------------------------------------------------------------------------------------------------------------------------------------------------------------------------------------------------------------------------------------------------------------------------------------------------------------------------------------------|
| 2530 | c58587_g1_i1_len_406_path_384_0_405_0                                | 7   | gastrula zinc finger                                                | 136 | 3.13E-30  | 59.60% | 0.102  | IPR015880 (SMART); IPR013087 (G3DSA:3.30.160.GENE3D); IPR013087 (G3DSA:3.30.160.GENE3D); PF13465 (PFAM); IPR013087 (G3DSA:3.30.160.GENE3D); PTHR24409 (PANTHER); IPR007087 (PROSITE_PATTERNS); IPR007087 (PROSITE_PATTERNS); IPR007087 (PROSITE_PATTERNS); IPR007087 (PROSITE_PATTERNS); IPR007087 (PROSITE_PROFILES); IPR007087 (PROSITE_PROFILES); IPR007087 (PROSITE_PROFILES); IPR007087 (PROSITE_PROFILES); IPR007087 (PROSITE_PROFILES); SSF57667 (SUPERFAMILY); SSF57667 (SUPERFAMILY); |
| 2531 | c5874_g1_i1_len_532_path_510_0_531_1                                 | 15  | serine protease easter-like isoform x1                              | 177 | 3.00E-25  | 53.40% | 0.311  | IPR006604 (SMART); IPR022700 (PFAM); G3DSA:2.40.10.10 (GENE3D); IPR001254 (PFAM); PTHR24260 (PANTHER); PTHR24260:SF3 (PANTHER); IPR018114 (PROSITE_PATTERNS); SIGNAL_PEPTIDE (PHOBIUS); SIGNAL_PEPTIDE_N_REGION (PHOBIUS); SIGNAL_PEPTIDE_H_REGION (PHOBIUS); NON_CYTOPLASMIC_DOMAIN (PHOBIUS); SIGNAL_PEPTIDE_C_REGION (PHOBIUS); IPR009003 (SUPERFAMILY); TMhelix (TMHMM)                                                                                                                    |
| 2532 | c58845_g1_i1_len_288_path_1_0_287_4                                  | 5   | ecto-nox disulfide-thiol exchanger partial                          | 96  | 9.95E-47  | 85.80% | 0.102  | Coil (COILS); IPR012677 (G3DSA:3.30.70.GENE3D); PF13893 (PFAM); PTHR16001 (PANTHER); IPR000504 (PROSITE_PROFILES); SSF54928 (SUPERFAMILY)                                                                                                                                                                                                                                                                                                                                                      |
| 2533 | c5892_g1_i1_len_625_path_974_0_244_372_245_624_2                     | 29  | heat shock protein 70                                               | 208 | 7.10E-138 | 98.90% | 0.224  | Coil (COILS); IPR013126 (PRINTS); IPR029047 (G3DSA:2.60.34.GENE3D); IPR013126 (PFAM); IPR029048 (G3DSA:1.20.1270.GENE3D); PTHR19375:SF142 (PANTHER); PTHR19375 (PANTHER); IPR029047 (SUPERFAMILY); IPR029048 (SUPERFAMILY)                                                                                                                                                                                                                                                                     |
| 2534 | c59522_g1_i1_len_427_path_405_0_426_3                                | 8   | polypeptide n-acetylgalactosaminyltransferase 35a                   | 143 | 4.35E-26  | 66.90% | 0.113  | PTHR11675:SF14 (PANTHER); PTHR11675 (PANTHER)                                                                                                                                                                                                                                                                                                                                                                                                                                                  |
| 2535 | c59536_g1_i1_len_145_path_1_0_144_4                                  | 1   | hypothetical protein L798_13682, partial                            | 48  | 7.42E-13  | 73.30% | 0.122  | G3DSA:2.10.25.10 (GENE3D); PF14670 (PFAM); SSF57196 (SUPERFAMILY)                                                                                                                                                                                                                                                                                                                                                                                                                              |
| 2536 | c59604_g1_i1_len_259_path_237_0_258_0                                | 4   | plexin domain-containing protein 2                                  | 87  | 9.21E-32  | 78.00% | 0.105  | PTHR13055:SF12 (PANTHER); PTHR13055 (PANTHER)                                                                                                                                                                                                                                                                                                                                                                                                                                                  |
| 2537 | c5974_g1_i1_len_316_path_294_0_315_3                                 | 4   | fibrillin-2-like                                                    | 106 | 2.55E-45  | 80.60% | 0.126  | IPR001881 (SMART); IPR000742 (SMART); G3DSA:2.10.25.10 (GENE3D); IPR001881 (PFAM); G3DSA:2.10.25.10 (GENE3D); G3DSA:2.10.25.10 (GENE3D); IPR011398 (PANTHER); PTHR24039:SF20 (PANTHER); IPR013032 (PROSITE_PATTERNS); IPR000152 (PROSITE_PATTERNS); IPR000152 (PROSITE_PATTERNS); IPR018097 (PROSITE_PATTERNS); IPR000152 (PROSITE_PATTERNS); IPR013032 (PROSITE_PATTERNS); IPR000742 (PROSITE_PROFILES); IPR000742 (PROSITE_PROFILES); IPR009030 (SUPERFAMILY)                                |
| 2538 | c5974_g2_i1_len_144_path_708_0_143_0                                 | 1   | fibrillin-1- partial                                                | 48  | 4.86E-09  | 72.20% | 0.124  | IPR017878 (G3DSA:3.90.290.GENE3D); IPR017878 (PFAM); IPR017878 (SUPERFAMILY)                                                                                                                                                                                                                                                                                                                                                                                                                   |
| 2539 | c5983_g1_i1_len_589_path_567_0_588_4                                 | 12  | a disintegrin and metalloproteinase with thrombospondin motifs 18   | 196 | 1.04E-29  | 57.10% | 0.104  | IPR006586 (SMART); IPR024079 (G3DSA:3.40.390.GENE3D); IPR001590 (PFAM); PTHR13723 (PANTHER); IPR001590 (PROSITE_PROFILES); SSF55486 (SUPERFAMILY)                                                                                                                                                                                                                                                                                                                                              |
| 2540 | c6059_g1_i1_len_1735_path_1905_0_1676_4_6_1677_1734_4                | 98  | mitochondrial import inner membrane translocase subunit tim8 a-like | 578 | 1.39E-19  | 80.90% | 0.137  | IPR004217 (PFAM); IPR004217 (G3DSA:1.10.287.GENE3D); PTHR21535 (PANTHER); IPR004217 (SUPERFAMILY)                                                                                                                                                                                                                                                                                                                                                                                              |
| 2541 | c6059_g1_i2_len_1883_path_1905_0_1676_3_581_1677_1824_46_1825_1882_5 | 102 | mitochondrial import inner membrane translocase subunit tim8 a      | 627 | 3.00E-30  | 82.20% | 0.411Y | IPR004217 (PFAM); IPR004217 (G3DSA:1.10.287.GENE3D); PTHR21535 (PANTHER); IPR004217 (SUPERFAMILY)                                                                                                                                                                                                                                                                                                                                                                                              |
| 2542 | c60825_g1_i1_len_378_path_1_0_377_4                                  | 8   | de-cadherin- partial                                                | 126 | 3.72E-20  | 58.30% | 0.11   | IPR002126 (G3DSA:2.60.40.GENE3D); PTHR24027 (PANTHER); PTHR24027:SF285 (PANTHER); IPR015919 (SUPERFAMILY)                                                                                                                                                                                                                                                                                                                                                                                      |
| 2543 | c6091_g1_i1_len_1396_path_10_0_1395_4                                | 195 | ras-related protein rab-8a isoform x2                               | 465 | 3.32E-135 | 95.90% | 0.128  | IPR001806 (PRINTS); IPR024156 (SMART); IPR002041 (SMART); IPR020849 (SMART); IPR003579 (SMART); IPR003578 (SMART); IPR005225 (TIGRFAM); IPR027417 (G3DSA:3.40.50.GENE3D); IPR001806 (PFAM); PTHR24073:SF22 (PANTHER); PTHR24073 (PANTHER); PS51419 (PROSITE_PROFILES); IPR027417 (SUPERFAMILY)                                                                                                                                                                                                 |
| 2544 | c60959_g1_i1_len_260_path_1_0_259_1                                  | 2   | leucine-rich repeat-containing protein 17                           | 87  | 9.45E-10  | 62.80% | 0.103  | G3DSA:3.80.10.10 (GENE3D); IPR001611 (PFAM); PTHR24365:SF233 (PANTHER); PTHR24365 (PANTHER); SSF52058 (SUPERFAMILY)                                                                                                                                                                                                                                                                                                                                                                            |
| 2545 | c6100_g2_i1_len_1379_path_271_0_1378_1                               | 33  | calcium-activated chloride channel regulator 1-like                 | 460 | 1.45E-101 | 53.70% | 0.136  | IPR002035 (SMART); IPR015394 (PFAM); IPR002035 (G3DSA:3.40.50.GENE3D); PF13519 (PFAM); PTHR10579 (PANTHER); PTHR10579:SF8 (PANTHER); IPR002035 (PROSITE_PROFILES); IPR002035 (SUPERFAMILY)                                                                                                                                                                                                                                                                                                     |
| 2546 | c61025_g1_i1_len_177_path_1_0_176_1                                  | 2   | dnak protein                                                        | 59  | 4.25E-25  | 91.70% | 0.128  | IPR013126 (PFAM); G3DSA:3.30.420.40 (GENE3D); G3DSA:3.90.640.10 (GENE3D); PTHR19375 (PANTHER); SSF53067 (SUPERFAMILY)                                                                                                                                                                                                                                                                                                                                                                          |
| 2547 | c6109_g1_i1_len_1295_path_1_0_527_529_5_28_605_607_606_1294_2        | 129 | annexin b9-like isoform x2                                          | 431 | 6.21E-128 | 72.80% | 0.231  | IPR001464 (PRINTS); IPR002391 (PRINTS); IPR018502 (SMART); IPR018502 (PFAM); IPR018502 (G3DSA:1.10.220.GENE3D); IPR018502 (G3DSA:1.10.220.GENE3D); IPR018502 (G3DSA:1.10.220.GENE3D); PTHR10502 (PANTHER); IPR018252 (PROSITE_PATTERNS); IPR018252 (PROSITE_PATTERNS); SSF47874 (SUPERFAMILY)                                                                                                                                                                                                  |

|      |                                                                  |     |                                                                                     |     |           |        |       |                                                                                                                                                                                                                                                                                                                                                                                                                                                                                                                                                                                                                                                                                                                                                                                                                                                                                                             |
|------|------------------------------------------------------------------|-----|-------------------------------------------------------------------------------------|-----|-----------|--------|-------|-------------------------------------------------------------------------------------------------------------------------------------------------------------------------------------------------------------------------------------------------------------------------------------------------------------------------------------------------------------------------------------------------------------------------------------------------------------------------------------------------------------------------------------------------------------------------------------------------------------------------------------------------------------------------------------------------------------------------------------------------------------------------------------------------------------------------------------------------------------------------------------------------------------|
| 2548 | c6117_g1_i1_len_1175_path_1153_0_512_166_513_513_1667_514_1174_0 | 52  | dentin sialophosphoprotein isoform x1                                               | 392 | 9.81E-116 | 64.20% | 0.099 | IPR015880 (SMART); PF13465 (PFAM); IPR013087 (G3DSA:3.30.160.GENE3D); IPR013087 (G3DSA:3.30.160.GENE3D); IPR013087 (G3DSA:3.30.160.GENE3D); PTHR24409:SF14 (PANTHER); PTHR24409 (PANTHER); IPR007087 (PROSITE_PATTERNS); IPR007087 (PROSITE_PROFILES); SSF57667 (SUPERFAMILY); SSF57667 (SUPERFAMILY); SSF57667 (SUPERFAMILY); SSF57667 (SUPERFAMILY); SSF57667 (SUPERFAMILY) |
| 2549 | c6127_g1_i1_len_854_path_53_0_853_5                              | 873 | Adrenodoxin, mitochondrial                                                          | 284 | 3.88E-52  | 76.90% | 0.123 | IPR001055 (PRINTS); IPR012675 (G3DSA:3.10.20.GENE3D); IPR001041 (PFAM); PTHR23426:SF21 (PANTHER); PTHR23426 (PANTHER); IPR018298 (PROSITE_PATTERNS); IPR001041 (PROSITE_PROFILES); IPR001041 (SUPERFAMILY)                                                                                                                                                                                                                                                                                                                                                                                                                                                                                                                                                                                                                                                                                                  |
| 2550 | c6130_g1_i1_len_143_path_1_0_142_3                               | 2   | reelin isoform x2                                                                   | 48  | 1.63E-11  | 66.60% | 0.107 | G3DSA:2.10.25.10 (GENE3D); IPR013032 (PROSITE_PATTERNS); IPR000742 (PROSITE_PROFILES); SSF57196 (SUPERFAMILY)                                                                                                                                                                                                                                                                                                                                                                                                                                                                                                                                                                                                                                                                                                                                                                                               |
| 2551 | c6130_g2_i1_len_871_path_1089_0_870_5                            | 30  | low quality protein: reelin-like                                                    | 290 | 2.16E-60  | 57.70% | 0.206 | IPR011040 (G3DSA:2.120.10.GENE3D); PTHR11841 (PANTHER); IPR011040 (SUPERFAMILY)                                                                                                                                                                                                                                                                                                                                                                                                                                                                                                                                                                                                                                                                                                                                                                                                                             |
| 2552 | c6131_g1_i1_len_1255_path_53_0_1254_4                            | 489 | estradiol 17-beta-dehydrogenase 8                                                   | 418 | 1.17E-88  | 72.40% | 0.273 | IPR002198 (PRINTS); IPR002347 (PRINTS); IPR013968 (SMART); IPR002198 (PFAM); IPR016040 (G3DSA:3.40.50.GENE3D); PTHR24316:SF254 (PANTHER); PTHR24316 (PANTHER); IPR020904 (PROSITE_PATTERNS); SSF51735 (SUPERFAMILY)                                                                                                                                                                                                                                                                                                                                                                                                                                                                                                                                                                                                                                                                                         |
| 2553 | c6141_g1_i1_len_1215_path_2593_0_13_141_5_14_1214_5              | 38  | cytochrome p450 2j2-like                                                            | 405 | 2.33E-112 | 61.40% | 0.129 | IPR002401 (PRINTS); IPR001128 (PRINTS); IPR001128 (G3DSA:1.10.630.GENE3D); IPR001128 (PFAM); PTHR24300 (PANTHER); IPR017972 (PROSITE_PATTERNS); IPR001128 (SUPERFAMILY)                                                                                                                                                                                                                                                                                                                                                                                                                                                                                                                                                                                                                                                                                                                                     |
| 2555 | c6166_g1_i1_len_1485_path_1_0_1484_4                             | 54  | disintegrin and metalloproteinase domain-containing protein 10-like                 | 495 | 0         | 78.30% | 0.105 | IPR001762 (SMART); IPR024079 (G3DSA:3.40.390.GENE3D); PF13688 (PFAM); IPR001762 (G3DSA:4.10.70.GENE3D); IPR001762 (PFAM); PTHR11905:SF4 (PANTHER); PTHR11905 (PANTHER); IPR001762 (PROSITE_PROFILES); IPR001590 (PROSITE_PROFILES); IPR001762 (SUPERFAMILY); SSF55486 (SUPERFAMILY)                                                                                                                                                                                                                                                                                                                                                                                                                                                                                                                                                                                                                         |
| 2556 | c6166_g2_i1_len_444_path_2925_0_443_3                            | 22  | disintegrin and metalloproteinase domain-containing protein 10 isoform x3           | 148 | 4.65E-46  | 67.90% | 0.157 | PTHR11905:SF4 (PANTHER); PTHR11905 (PANTHER); CYTOPLASMIC_DOMAIN (PHOBIUS); NON_CYTOPLASMIC_DOMAIN (PHOBIUS); TRANSMEMBRANE (PHOBIUS); TMhelix (TMHMM)                                                                                                                                                                                                                                                                                                                                                                                                                                                                                                                                                                                                                                                                                                                                                      |
| 2554 | c61666_g1_i1_len_250_path_1_0_249_2                              | 4   | leucine-rich transmembrane                                                          | 83  | 4.54E-14  | 66.00% | 0.116 | PR00019 (PRINTS); IPR003591 (SMART); IPR001611 (PFAM); G3DSA:3.80.10.10 (GENE3D); PTHR24365 (PANTHER); IPR001611 (PROSITE_PROFILES); IPR001611 (PROSITE_PROFILES); IPR001611 (PROSITE_PROFILES); SSF52058 (SUPERFAMILY)                                                                                                                                                                                                                                                                                                                                                                                                                                                                                                                                                                                                                                                                                     |
| 2557 | c62039_g1_i1_len_259_path_237_0_258_1                            | 8   | tyrosine-protein phosphatase                                                        | 86  | 5.41E-37  | 83.80% | 0.132 | IPR000242 (PFAM); IPR029021 (G3DSA:3.90.190.GENE3D); PTHR19134 (PANTHER); IPR000242 (PROSITE_PROFILES); IPR029021 (SUPERFAMILY)                                                                                                                                                                                                                                                                                                                                                                                                                                                                                                                                                                                                                                                                                                                                                                             |
| 2558 | c6209_g1_i1_len_1308_path_1286_0_1307_2                          | 102 | twitchin isoform x4                                                                 | 436 | 0         | 83.70% | 0.116 | PR00014 (PRINTS); IPR003599 (SMART); IPR003961 (SMART); IPR013783 (G3DSA:2.60.40.GENE3D); IPR003961 (PFAM); IPR013098 (PFAM); IPR013783 (G3DSA:2.60.40.GENE3D); IPR013783 (G3DSA:2.60.40.GENE3D); IPR013783 (G3DSA:2.60.40.GENE3D); IPR013783 (G3DSA:2.60.40.GENE3D); PTHR19897:SF155 (PANTHER); PTHR19897 (PANTHER); IPR003961 (PROSITE_PROFILES); IPR003961 (PROSITE_PROFILES); IPR003961 (PROSITE_PROFILES); IPR007110 (PROSITE_PROFILES); SSF48726 (SUPERFAMILY); IPR003961 (SUPERFAMILY); SSF48726 (SUPERFAMILY); IPR003961 (SUPERFAMILY)                                                                                                                                                                                                                                                                                                                                                              |
| 2559 | c6215_g1_i1_len_309_path_1_0_308_1                               | 10  | von willebrand factor type egf and pentraxin domain-containing protein 1 isoform x2 | 103 | 2.69E-14  | 54.50% | 0.1   | IPR000436 (SMART); G3DSA:2.10.70.10 (GENE3D); G3DSA:2.10.70.10 (GENE3D); IPR000436 (PFAM); PTHR19325 (PANTHER); IPR000436 (PROSITE_PROFILES); IPR000436 (PROSITE_PROFILES); IPR000436 (SUPERFAMILY); IPR000436 (SUPERFAMILY)                                                                                                                                                                                                                                                                                                                                                                                                                                                                                                                                                                                                                                                                                |



[illegible]



|      |                                                  |      |                                                                             |     |           |        |       |                                                                                                                                                                                                                                                                                                                                                                                                                                                                                                                                                                                                                                                                      |
|------|--------------------------------------------------|------|-----------------------------------------------------------------------------|-----|-----------|--------|-------|----------------------------------------------------------------------------------------------------------------------------------------------------------------------------------------------------------------------------------------------------------------------------------------------------------------------------------------------------------------------------------------------------------------------------------------------------------------------------------------------------------------------------------------------------------------------------------------------------------------------------------------------------------------------|
| 2576 | c6636_g1_i1_len_540_path_568_0_539_2             | 24   | zinc finger protein 26-like                                                 | 180 | 5.94E-22  | 56.30% | 0.113 | IPR015880 (SMART); PF13912 (PFAM); IPR013087 (G3DSA:3.30.160.GENE3D); PF13465 (PFAM); IPR013087 (G3DSA:3.30.160.GENE3D); PTHR24409 (PANTHER); PTHR24409:SF13 (PANTHER); IPR007087 (PROSITE_PATTERNS); IPR007087 (PROSITE_PATTERNS); IPR007087 (PROSITE_PATTERNS); IPR007087 (PROSITE_PROFILES); IPR007087 (PROSITE_PROFILES); IPR007087 (PROSITE_PROFILES); SSF57667 (SUPERFAMILY); SSF57667 (SUPERFAMILY)                                                                                                                                                                                                                                                           |
| 2577 | c6637_g1_i1_len_610_path_53_0_609_2              | 17   | glutamyl aminopeptidase-like                                                | 203 | 3.86E-17  | 54.20% | 0.138 | IPR014782 (PFAM); IPR001930 (PANTHER); PTHR11533:SF165 (PANTHER); NON_CYTOPLASMIC_DOMAIN (PHOBIUS); TRANSMEMBRANE (PHOBIUS); CYTOPLASMIC_DOMAIN (PHOBIUS); SSF63737 (SUPERFAMILY); TMhelix (TMHMM)                                                                                                                                                                                                                                                                                                                                                                                                                                                                   |
| 2578 | c6663_g1_i1_len_373_path_221_0_249_121_250_372_1 | 11   | insulin-like growth factor-binding protein complex acid labile subunit-like | 124 | 1.34E-20  | 57.40% | 0.108 | IPR003591 (SMART); G3DSA:3.80.10.10 (GENE3D); IPR001611 (PFAM); IPR001611 (PFAM); PTHR24365 (PANTHER); SSF52058 (SUPERFAMILY)                                                                                                                                                                                                                                                                                                                                                                                                                                                                                                                                        |
| 2579 | c6703_g2_i1_len_156_path_354_0_155_0             | 2    | ankyrin repeat domain-containing protein 27-like                            | 52  | 2.01E-14  | 73.70% | 0.223 | IPR002110 (SMART); IPR020683 (PFAM); IPR020683 (G3DSA:1.25.40.GENE3D); IPR020683 (PROSITE_PROFILES); IPR002110 (PROSITE_PROFILES); IPR020683 (SUPERFAMILY)                                                                                                                                                                                                                                                                                                                                                                                                                                                                                                           |
| 2580 | c672_g1_i1_len_1810_path_53_0_1809_5             | 1208 | ras-related protein rab-1a                                                  | 603 | 4.37E-130 | 93.90% | 0.154 | IPR001806 (PRINTS); IPR020849 (SMART); IPR003578 (SMART); IPR024156 (SMART); IPR002041 (SMART); IPR003579 (SMART); IPR001806 (PFAM); IPR027417 (G3DSA:3.40.50.GENE3D); IPR005225 (TIGRFAM); PTHR24073 (PANTHER); PTHR24073:SF455 (PANTHER); NON_CYTOPLASMIC_DOMAIN (PHOBIUS); TRANSMEMBRANE (PHOBIUS); TRANSMEMBRANE (PHOBIUS); CYTOPLASMIC_DOMAIN (PHOBIUS); NON_CYTOPLASMIC_DOMAIN (PHOBIUS); PS51419 (PROSITE_PROFILES); IPR027417 (SUPERFAMILY); TMhelix (TMHMM); TMhelix (TMHMM)                                                                                                                                                                                |
| 2581 | c6795_g1_i1_len_2263_path_2291_0_2262_5          | 176  | cytochrome p450 cyp44                                                       | 754 | 0         | 65.70% | 0.305 | IPR002401 (PRINTS); IPR001128 (PRINTS); IPR001128 (PFAM); IPR001128 (G3DSA:1.10.630.GENE3D); PTHR24292:SF0 (PANTHER); PTHR24292 (PANTHER); IPR017972 (PROSITE_PATTERNS); IPR001128 (SUPERFAMILY)                                                                                                                                                                                                                                                                                                                                                                                                                                                                     |
| 2582 | c68270_g1_i1_len_851_path_1_0_850_2              | 31   | gastrula zinc finger                                                        | 283 | 9.27E-68  | 56.70% | 0.097 | IPR015880 (SMART); IPR013087 (G3DSA:3.30.160.GENE3D); PF13465 (PFAM); IPR013087 (G3DSA:3.30.160.GENE3D); PF13912 (PFAM); IPR013087 (G3DSA:3.30.160.GENE3D); IPR013087 (G3DSA:3.30.160.GENE3D); IPR007087 (PFAM); PTHR24409 (PANTHER); IPR007087 (PROSITE_PATTERNS); IPR007087 (PROSITE_PATTERNS); IPR007087 (PROSITE_PATTERNS); IPR007087 (PROSITE_PROFILES); IPR007087 (PROSITE_PROFILES); IPR007087 (PROSITE_PROFILES); IPR007087 (PROSITE_PROFILES); IPR007087 (PROSITE_PROFILES); IPR007087 (PROSITE_PROFILES); SSF57667 (SUPERFAMILY); SSF57667 (SUPERFAMILY); SSF57667 (SUPERFAMILY)                                                                           |
| 2583 | c68271_g1_i1_len_1148_path_1_0_1147_4            | 114  | tho complex subunit 3                                                       | 383 | 0         | 87.00% | 0.104 | IPR020472 (PRINTS); IPR001680 (SMART); IPR015943 (G3DSA:2.130.10.GENE3D); IPR015943 (G3DSA:2.130.10.GENE3D); IPR011659 (PFAM); IPR001680 (PFAM); PTHR22839 (PANTHER); IPR019775 (PROSITE_PATTERNS); TRANSMEMBRANE (PHOBIUS); CYTOPLASMIC_DOMAIN (PHOBIUS); NON_CYTOPLASMIC_DOMAIN (PHOBIUS); IPR017986 (PROSITE_PROFILES); IPR001680 (PROSITE_PROFILES); IPR001680 (PROSITE_PROFILES); IPR001680 (PROSITE_PROFILES); IPR017986 (SUPERFAMILY); TMhelix (TMHMM)                                                                                                                                                                                                        |
| 2584 | c68459_g1_i1_len_2322_path_1_0_2321_3            | 101  | fez family zinc finger protein 2                                            | 774 | 0         | 76.50% | 0.15  | Coil (COILS); IPR015880 (SMART); PF13912 (PFAM); IPR013087 (G3DSA:3.30.160.GENE3D); PF13465 (PFAM); IPR013087 (G3DSA:3.30.160.GENE3D); IPR013087 (G3DSA:3.30.160.GENE3D); IPR007087 (PFAM); IPR013087 (G3DSA:3.30.160.GENE3D); PTHR24409 (PANTHER); IPR007087 (PROSITE_PATTERNS); IPR007087 (PROSITE_PATTERNS); IPR007087 (PROSITE_PATTERNS); IPR007087 (PROSITE_PATTERNS); IPR007087 (PROSITE_PATTERNS); IPR007087 (PROSITE_PROFILES); IPR007087 (PROSITE_PROFILES); IPR007087 (PROSITE_PROFILES); IPR007087 (PROSITE_PROFILES); IPR007087 (PROSITE_PROFILES); IPR007087 (PROSITE_PROFILES); SSF57667 (SUPERFAMILY); SSF57667 (SUPERFAMILY); SSF57667 (SUPERFAMILY) |

|      |                                                   |    |                                                                           |     |          |        |         |                                                                                                                                                                                                                                                                                                                                                                                                                                        |
|------|---------------------------------------------------|----|---------------------------------------------------------------------------|-----|----------|--------|---------|----------------------------------------------------------------------------------------------------------------------------------------------------------------------------------------------------------------------------------------------------------------------------------------------------------------------------------------------------------------------------------------------------------------------------------------|
| 2585 | c68472_g1_i1_len_1541_path_1_0_1540_4             | 82 | neuroendocrine partial                                                    | 514 | 1.76E-86 | 61.20% | 0.106   | IPR000209 (G3DSA:3.40.50.GENE3D); IPR000209 (PFAM); IPR002884 (PFAM); IPR008979 (G3DSA:2.60.120.GENE3D); IPR015500 (PANTHER); PTHR10795:SF340 (PANTHER); IPR023828 (PROSITE_PATTERNS); CYTOPLASMIC_DOMAIN (PHOBIUS); TRANSMEMBRANE (PHOBIUS); TRANSMEMBRANE (PHOBIUS); NON_CYTOPLASMIC_DOMAIN (PHOBIUS); NON_CYTOPLASMIC_DOMAIN (PHOBIUS); IPR008979 (SUPERFAMILY); IPR000209 (SUPERFAMILY); TMhelix (TMHMM); TMhelix (TMHMM)          |
| 2586 | c68487_g1_i1_len_358_path_1_0_357_3               | 8  | kn motif and ankyrin repeat domain-containing protein 1                   | 120 | 6.05E-46 | 77.60% | 0.165   | IPR002110 (SMART); IPR020683 (G3DSA:1.25.40.GENE3D); IPR020683 (PFAM); PTHR24168:SF19 (PANTHER); PTHR24168 (PANTHER); IPR002110 (PROSITE_PROFILES); IPR020683 (PROSITE_PROFILES); IPR002110 (PROSITE_PROFILES); IPR020683 (SUPERFAMILY)                                                                                                                                                                                                |
| 2587 | c68577_g1_i1_len_733_path_711_0_732_1             | 18 | agap008807-pa-like protein                                                | 244 | 2.46E-48 | 57.50% | 0.618 Y | IPR015816 (G3DSA:2.30.230.GENE3D); IPR001747 (PFAM); PTHR23345:SF11 (PANTHER); PTHR23345 (PANTHER); SIGNAL_PEPTIDE_H_REGION (PHOBIUS); NON_CYTOPLASMIC_DOMAIN (PHOBIUS); SIGNAL_PEPTIDE_N_REGION (PHOBIUS); SIGNAL_PEPTIDE_C_REGION (PHOBIUS); SIGNAL_PEPTIDE (PHOBIUS); IPR001747 (PROSITE_PROFILES); SignalP-noTM (SIGNALP_EUK); IPR015819 (SUPERFAMILY)                                                                             |
| 2588 | c68638_g1_i1_len_1676_path_1_0_1675_5             | 58 | zinc finger and btb domain-containing protein 24                          | 558 | 9.00E-67 | 55.70% | 0.139   | IPR015880 (SMART); IPR013087 (G3DSA:3.30.160.GENE3D); IPR013087 (G3DSA:3.30.160.GENE3D); PF13465 (PFAM); PF13894 (PFAM); PTHR24409 (PANTHER); PTHR24409:SF14 (PANTHER); IPR007087 (PROSITE_PATTERNS); IPR007087 (PROSITE_PATTERNS); IPR007087 (PROSITE_PROFILES); IPR007087 (PROSITE_PROFILES); IPR007087 (PROSITE_PROFILES); IPR007087 (PROSITE_PROFILES); SSF57667 (SUPERFAMILY); SSF57667 (SUPERFAMILY)                             |
| 2589 | c68643_g1_i1_len_1071_path_1049_0_1070_3          | 84 | complement c1q tumor necrosis factor-related protein 6 precursor          | 357 | 1.08E-19 | 52.20% | 0.122   | Coil (COILS); IPR001073 (PRINTS); IPR001073 (SMART); IPR008983 (G3DSA:2.60.120.GENE3D); IPR001073 (PFAM); PTHR22923:SF51 (PANTHER); PTHR22923 (PANTHER); TRANSMEMBRANE (PHOBIUS); CYTOPLASMIC_DOMAIN (PHOBIUS); NON_CYTOPLASMIC_DOMAIN (PHOBIUS); IPR001073 (PROSITE_PROFILES); IPR008983 (SUPERFAMILY); TMhelix (TMHMM)                                                                                                               |
| 2590 | c68671_g1_i1_len_809_path_1_0_808_2               | 32 | dehydrogenase reductase sdr family member on chromosome x-like isoform x1 | 269 | 3.02E-72 | 62.30% | 0.114   | IPR016040 (G3DSA:3.40.50.GENE3D); IPR002198 (PFAM); PTHR24320 (PANTHER); SSF51735 (SUPERFAMILY)                                                                                                                                                                                                                                                                                                                                        |
| 2591 | c68672_g1_i1_len_271_path_249_0_270_3             | 5  | transient receptor potential channel pyrexia-like                         | 91  | 1.78E-19 | 68.30% | 0.115   | IPR002110 (SMART); IPR020683 (G3DSA:1.25.40.GENE3D); IPR020683 (PFAM); PF13857 (PFAM); PTHR24188 (PANTHER); IPR020683 (PROSITE_PROFILES); IPR002110 (PROSITE_PROFILES); IPR002110 (PROSITE_PROFILES); IPR020683 (SUPERFAMILY)                                                                                                                                                                                                          |
| 2592 | c6874_g1_i1_len_324_path_494_0_164_1010_165_323_1 | 18 | zinc finger protein                                                       | 108 | 8.60E-11 | 63.10% | 0.104   | IPR015880 (SMART); IPR013087 (G3DSA:3.30.160.GENE3D); PF13465 (PFAM); IPR013087 (G3DSA:3.30.160.GENE3D); PTHR24409:SF14 (PANTHER); PTHR24409 (PANTHER); IPR007087 (PROSITE_PATTERNS); IPR007087 (PROSITE_PATTERNS); IPR007087 (PROSITE_PROFILES); IPR007087 (PROSITE_PROFILES); SSF57667 (SUPERFAMILY)                                                                                                                                 |
| 2593 | c68764_g1_i1_len_724_path_702_0_723_4             | 12 | envelope partial                                                          | 241 | 2.54E-19 | 43.00% | 0.136   | IPR013755 (G3DSA:3.30.387.GENE3D); IPR013754 (G3DSA:2.60.98.GENE3D); IPR011998 (PFAM); IPR011998 (SUPERFAMILY)                                                                                                                                                                                                                                                                                                                         |
| 2594 | c68789_g1_i1_len_529_path_1_0_528_1               | 12 | zinc finger protein 846 isoform x2                                        | 176 | 1.97E-39 | 58.50% | 0.103   | IPR015880 (SMART); PF13465 (PFAM); IPR013087 (G3DSA:3.30.160.GENE3D); IPR013087 (G3DSA:3.30.160.GENE3D); PF13894 (PFAM); PTHR24409 (PANTHER); IPR007087 (PROSITE_PATTERNS); IPR007087 (PROSITE_PATTERNS); IPR007087 (PROSITE_PATTERNS); IPR007087 (PROSITE_PROFILES); IPR007087 (PROSITE_PROFILES); IPR007087 (PROSITE_PROFILES); IPR007087 (PROSITE_PROFILES); SSF57667 (SUPERFAMILY); SSF57667 (SUPERFAMILY); SSF57667 (SUPERFAMILY) |
| 2595 | c6880_g1_i1_len_1452_path_1430_0_1451_2           | 84 | low quality protein: cubilin                                              | 484 | 4.20E-81 | 54.50% | 0.22    | IPR000859 (SMART); IPR000859 (G3DSA:2.60.120.GENE3D); IPR000859 (PFAM); IPR000859 (G3DSA:2.60.120.GENE3D); PTHR10127:SF569 (PANTHER); PTHR10127 (PANTHER); IPR000859 (PROSITE_PROFILES); IPR000859 (PROSITE_PROFILES); IPR000859 (PROSITE_PROFILES); IPR000859 (SUPERFAMILY); IPR000859 (SUPERFAMILY); IPR000859 (SUPERFAMILY); IPR000859 (SUPERFAMILY)                                                                                |

|      |                                                                                  |      |                                                                          |     |          |        |        |                                                                                                                                                                                                                                                                                                                                                                                                                                                                                                                                                                                                                                                                                                          |
|------|----------------------------------------------------------------------------------|------|--------------------------------------------------------------------------|-----|----------|--------|--------|----------------------------------------------------------------------------------------------------------------------------------------------------------------------------------------------------------------------------------------------------------------------------------------------------------------------------------------------------------------------------------------------------------------------------------------------------------------------------------------------------------------------------------------------------------------------------------------------------------------------------------------------------------------------------------------------------------|
| 2596 | c68834_g1_i1_len_705_path_1_0_704_3                                              | 27   | cub and sushi domain-containing protein 3-like                           | 235 | 1.11E-08 | 47.20% | 0.201  | IPR000859 (SMART); IPR000859 (PFAM); IPR000859 (G3DSA:2.60.120.GENE3D); PTHR22991:SF23 (PANTHER); PTHR22991 (PANTHER); NON_CYTOPLASMIC_DOMAIN (PHOBIUS); TRANSMEMBRANE (PHOBIUS); CYTOPLASMIC_DOMAIN (PHOBIUS); NON_CYTOPLASMIC_DOMAIN (PHOBIUS); TRANSMEMBRANE (PHOBIUS); IPR000859 (PROSITE_PROFILES); IPR000859 (SUPERFAMILY); TMhelix (TMHMM)                                                                                                                                                                                                                                                                                                                                                        |
| 2597 | c68861_g1_i1_len_2686_path_1_0_2685_4                                            | 3379 | heat shock 70 kda protein cognate 3                                      | 895 | 0        | 93.90% | 0.15   | Coil (COILS); Coil (COILS); IPR013126 (PRINTS); IPR029047 (G3DSA:2.60.34.GENE3D); G3DSA:3.30.30.30 (GENE3D); IPR029048 (G3DSA:1.20.1270.GENE3D); G3DSA:3.90.640.10 (GENE3D); G3DSA:3.30.420.40 (GENE3D); IPR013126 (PFAM); G3DSA:3.30.420.40 (GENE3D); PTHR19375:SF157 (PANTHER); PTHR19375 (PANTHER); IPR018181 (PROSITE_PATTERNS); IPR018181 (PROSITE_PATTERNS); IPR018181 (PROSITE_PATTERNS); TRANSMEMBRANE (PHOBIUS); NON_CYTOPLASMIC_DOMAIN (PHOBIUS); TRANSMEMBRANE (PHOBIUS); CYTOPLASMIC_DOMAIN (PHOBIUS); NON_CYTOPLASMIC_DOMAIN (PHOBIUS); IPR029048 (SUPERFAMILY); SSF53067 (SUPERFAMILY); SSF53067 (SUPERFAMILY); IPR029047 (SUPERFAMILY); TMhelix (TMHMM); TMhelix (TMHMM); TMhelix (TMHMM) |
| 2598 | c68881_g1_i1_len_449_path_1_0_448_1                                              | 4    | probable serine carboxypeptidase cpvl isoform x2                         | 150 | 1.60E-22 | 71.30% | 0.109  | IPR029058 (G3DSA:3.40.50.GENE3D); IPR001563 (PFAM); PTHR11802:SF30 (PANTHER); IPR001563 (PANTHER); IPR029058 (SUPERFAMILY)                                                                                                                                                                                                                                                                                                                                                                                                                                                                                                                                                                               |
| 2599 | c68985_g1_i1_len_1327_path_1305_0_1326_0                                         | 60   | #NAME?                                                                   | 443 | 0        | 81.70% | 0.125  | G3DSA:3.40.50.2000 (GENE3D); IPR001830 (PFAM); G3DSA:3.40.50.2000 (GENE3D); PTHR10788:SF6 (PANTHER); PTHR10788 (PANTHER); SSF53756 (SUPERFAMILY)                                                                                                                                                                                                                                                                                                                                                                                                                                                                                                                                                         |
| 2600 | c69004_g1_i1_len_1639_path_1617_0_1638_2                                         | 98   | carbohydrate sulfotransferase 11-like                                    | 546 | 1.38E-66 | 55.30% | 0.374Y | IPR005331 (PFAM); IPR018011 (PANTHER); CYTOPLASMIC_DOMAIN (PHOBIUS); NON_CYTOPLASMIC_DOMAIN (PHOBIUS); TRANSMEMBRANE (PHOBIUS); TMhelix (TMHMM); TMhelix (TMHMM)                                                                                                                                                                                                                                                                                                                                                                                                                                                                                                                                         |
| 2601 | c69037_g1_i1_len_1276_path_1254_0_1275_3                                         | 2260 | histone 1o                                                               | 426 | 2.51E-29 | 71.80% | 0.126  | IPR005819 (PRINTS); IPR005818 (SMART); IPR005818 (PFAM); IPR011991 (G3DSA:1.10.10.GENE3D); PTHR11467 (PANTHER); TRANSMEMBRANE (PHOBIUS); CYTOPLASMIC_DOMAIN (PHOBIUS); NON_CYTOPLASMIC_DOMAIN (PHOBIUS); IPR005818 (PROSITE_PROFILES); SSF46785 (SUPERFAMILY)                                                                                                                                                                                                                                                                                                                                                                                                                                            |
| 2602 | c69072_g1_i1_len_2236_path_1_0_2235_0                                            | 143  | transcription initiation factor tfiid subunit 5                          | 746 | 0        | 83.40% | 0.108  | IPR020472 (PRINTS); IPR001680 (SMART); IPR015943 (G3DSA:2.130.10.GENE3D); IPR007582 (PFAM); IPR001680 (PFAM); PTHR19879 (PANTHER); IPR019775 (PROSITE_PATTERNS); IPR019775 (PROSITE_PATTERNS); IPR017986 (PROSITE_PROFILES); IPR006594 (PROSITE_PROFILES); IPR001680 (PROSITE_PROFILES); IPR001680 (PROSITE_PROFILES); IPR001680 (PROSITE_PROFILES); IPR001680 (PROSITE_PROFILES); SSF160897 (SUPERFAMILY); IPR017986 (SUPERFAMILY)                                                                                                                                                                                                                                                                      |
| 2603 | c69092_g1_i1_len_426_path_404_0_425_0                                            | 7    | r-spondin- partial                                                       | 142 | 1.07E-13 | 59.50% | 0.109  | G3DSA:2.20.100.10 (GENE3D); IPR000884 (PROSITE_PROFILES); IPR000884 (SUPERFAMILY)                                                                                                                                                                                                                                                                                                                                                                                                                                                                                                                                                                                                                        |
| 2604 | c69098_g1_i1_len_955_path_3_0_954_3                                              | 23   | von willebrand factor type egf and pentraxin domain-containing protein 1 | 319 | 5.03E-13 | 42.60% | 0.12   | IPR000436 (SMART); IPR000562 (SMART); IPR000562 (PFAM); IPR000436 (PFAM); IPR000562 (G3DSA:2.10.10.GENE3D); G3DSA:2.10.70.10 (GENE3D); PTHR19325:SF330 (PANTHER); PTHR19325 (PANTHER); IPR000436 (PROSITE_PROFILES); IPR000436 (PROSITE_PROFILES); IPR000562 (PROSITE_PROFILES); IPR000436 (SUPERFAMILY); IPR013806 (SUPERFAMILY)                                                                                                                                                                                                                                                                                                                                                                        |
| 2605 | c69106_g1_i1_len_331_path_1_0_330_5                                              | 11   | habp2-prov protein                                                       | 110 | 1.40E-19 | 58.50% | 0.2    | IPR001314 (PRINTS); G3DSA:2.40.10.10 (GENE3D); G3DSA:2.40.10.10 (GENE3D); IPR001254 (PFAM); PTHR24265 (PANTHER); IPR018114 (PROSITE_PATTERNS); IPR001254 (PROSITE_PROFILES); IPR009003 (SUPERFAMILY)                                                                                                                                                                                                                                                                                                                                                                                                                                                                                                     |
| 2609 | c692_g1_i1_len_1697_path_1619_0_434_46_435_1450_3068_1451_1573_3068_1574_169_6_5 | 63   | low-density lipoprotein receptor-related protein 2                       | 565 | 4.88E-23 | 64.20% | 0.103  | IPR002172 (PRINTS); IPR002172 (SMART); IPR002172 (PFAM); IPR002172 (G3DSA:4.10.400.GENE3D); IPR002172 (G3DSA:4.10.400.GENE3D); PTHR10529 (PANTHER); IPR023415 (PROSITE_PATTERNS); IPR023415 (PROSITE_PATTERNS); NON_CYTOPLASMIC_DOMAIN (PHOBIUS); CYTOPLASMIC_DOMAIN (PHOBIUS); TRANSMEMBRANE (PHOBIUS); IPR002172 (PROSITE_PROFILES); IPR002172 (PROSITE_PROFILES); IPR002172 (SUPERFAMILY); IPR002172 (SUPERFAMILY)                                                                                                                                                                                                                                                                                    |
| 2606 | c6924_g1_i1_len_828_path_1_0_430_432_43_1_827_0                                  | 40   | serine protease easter                                                   | 276 | 3.22E-45 | 61.30% | 0.107  | IPR001314 (PRINTS); IPR001254 (SMART); IPR001254 (PFAM); G3DSA:2.40.10.10 (GENE3D); PTHR24268 (PANTHER); IPR018114 (PROSITE_PATTERNS); IPR001254 (PROSITE_PROFILES); IPR009003 (SUPERFAMILY)                                                                                                                                                                                                                                                                                                                                                                                                                                                                                                             |

|      |                                                                          |     |                                                                                                                                                                            |      |           |        |       |                                                                                                                                                                                                                                                                                                                                                                                                                                                                                                                                                                                                                                                                                         |
|------|--------------------------------------------------------------------------|-----|----------------------------------------------------------------------------------------------------------------------------------------------------------------------------|------|-----------|--------|-------|-----------------------------------------------------------------------------------------------------------------------------------------------------------------------------------------------------------------------------------------------------------------------------------------------------------------------------------------------------------------------------------------------------------------------------------------------------------------------------------------------------------------------------------------------------------------------------------------------------------------------------------------------------------------------------------------|
| 2607 | c69251_g1_i1_len_680_path_1_0_679_5                                      | 23  | tyrosine-protein kinase hopscotch                                                                                                                                          | 226  | 1.98E-60  | 67.80% | 0.117 | IPR001245 (PRINTS); IPR020635 (SMART); IPR001245 (PFAM); G3DSA:1.10.510.10 (GENE3D); PTHR24418:SF206 (PANTHER); PTHR24418 (PANTHER); IPR000719 (PROSITE_PROFILES); IPR011009 (SUPERFAMILY) IPR000242 (PRINTS); IPR003595 (SMART); IPR000242 (SMART); IPR000242 (PFAM); IPR029021 (G3DSA:3.90.190.GENE3D); PTHR19134 (PANTHER); IPR016130 (PROSITE_PATTERNS); IPR000387 (PROSITE_PROFILES); IPR000242 (PROSITE_PROFILES); IPR029021 (SUPERFAMILY)                                                                                                                                                                                                                                        |
| 2608 | c69276_g1_i1_len_1014_path_1_0_1013_4                                    | 33  | receptor-type tyrosine-protein phosphatase eta-partial                                                                                                                     | 338  | 5.93E-56  | 65.80% | 0.159 | Coil (COILS); IPR015880 (SMART); PF13465 (PFAM); IPR007087 (PFAM); IPR013087 (G3DSA:3.30.160.GENE3D); PF13912 (PFAM); IPR013087 (G3DSA:3.30.160.GENE3D); IPR013087 (G3DSA:3.30.160.GENE3D); PTHR24409 (PANTHER); IPR007087 (PROSITE_PATTERNS); IPR007087 (PROSITE_PATTERNS); IPR007087 (PROSITE_PATTERNS); IPR007087 (PROSITE_PATTERNS); IPR007087 (PROSITE_PATTERNS); IPR007087 (PROSITE_PATTERNS); IPR007087 (PROSITE_PROFILES); IPR007087 (PROSITE_PROFILES); IPR007087 (PROSITE_PROFILES); IPR007087 (PROSITE_PROFILES); IPR007087 (PROSITE_PROFILES); IPR007087 (PROSITE_PROFILES); SSF57667 (SUPERFAMILY); SSF57667 (SUPERFAMILY); SSF57667 (SUPERFAMILY); SSF57667 (SUPERFAMILY) |
| 2610 | c69379_g1_i1_len_1556_path_1534_0_1555_2                                 | 46  | isoform cra_a                                                                                                                                                              | 518  | 1.63E-50  | 56.10% | 0.097 | IPR003599 (SMART); IPR003598 (SMART); IPR013783 (G3DSA:2.60.40.GENE3D); IPR013098 (PFAM); IPR010909 (PFAM); IPR013783 (G3DSA:2.60.40.GENE3D); PTHR10489 (PANTHER); TRANSMEMBRANE (PHOBIUS); NON_CYTOPLASMIC_DOMAIN (PHOBIUS); CYTOPLASMIC_DOMAIN (PHOBIUS); IPR007110 (PROSITE_PROFILES); IPR007110 (PROSITE_PROFILES); IPR010909 (PROSITE_PROFILES); SSF48726 (SUPERFAMILY); SSF48726 (SUPERFAMILY); TMhelix (TMHMM); TMhelix (TMHMM)                                                                                                                                                                                                                                                  |
| 2611 | c6941_g1_i1_len_1521_path_47_0_38_85_39_518_46_519_1397_1443_1398_1520_1 | 96  | papilin isoform x2                                                                                                                                                         | 507  | 2.87E-107 | 63.20% | 0.14  | IPR003598 (SMART); IPR003599 (SMART); IPR013783 (G3DSA:2.60.40.GENE3D); IPR010909 (PFAM); IPR013098 (PFAM); PTHR10489 (PANTHER); TRANSMEMBRANE (PHOBIUS); CYTOPLASMIC_DOMAIN (PHOBIUS); IPR010909 (PROSITE_PROFILES); IPR007110 (PROSITE_PROFILES); SSF48726 (SUPERFAMILY); TMhelix (TMHMM); TMhelix (TMHMM)                                                                                                                                                                                                                                                                                                                                                                            |
| 2612 | c6941_g1_i2_len_1041_path_47_0_38_46__3_9_917_1443_918_1040_1            | 55  | papilin-like isoform x8                                                                                                                                                    | 347  | 1.60E-55  | 67.20% | 0.129 | IPR003598 (SMART); IPR003599 (SMART); IPR013783 (G3DSA:2.60.40.GENE3D); IPR010909 (PFAM); IPR013098 (PFAM); PTHR10489 (PANTHER); TRANSMEMBRANE (PHOBIUS); CYTOPLASMIC_DOMAIN (PHOBIUS); IPR010909 (PROSITE_PROFILES); IPR007110 (PROSITE_PROFILES); SSF48726 (SUPERFAMILY); TMhelix (TMHMM); TMhelix (TMHMM)                                                                                                                                                                                                                                                                                                                                                                            |
| 2613 | c69424_g1_i1_len_564_path_1_0_563_4                                      | 12  | zinc finger protein 271 (zinc finger protein 7) (zinc finger protein znfpheX133) (epstein-barr virus-induced zinc finger protein) (znf-eB) (ct-zfp48) (zinc finger protein | 188  | 2.06E-25  | 58.00% | 0.105 | IPR015880 (SMART); IPR007087 (PFAM); IPR013087 (G3DSA:3.30.160.GENE3D); PF13465 (PFAM); PF13894 (PFAM); IPR013087 (G3DSA:3.30.160.GENE3D); PTHR24409 (PANTHER); IPR007087 (PROSITE_PATTERNS); IPR007087 (PROSITE_PATTERNS); IPR007087 (PROSITE_PATTERNS); IPR007087 (PROSITE_PATTERNS); IPR007087 (PROSITE_PROFILES); IPR007087 (PROSITE_PROFILES); IPR007087 (PROSITE_PROFILES); IPR007087 (PROSITE_PROFILES); SSF57667 (SUPERFAMILY); SSF57667 (SUPERFAMILY); SSF57667 (SUPERFAMILY); SSF57667 (SUPERFAMILY)                                                                                                                                                                          |
| 2614 | c69430_g1_i1_len_3614_path_1_0_3613_2                                    | 195 | collagen alpha-1 chain                                                                                                                                                     | 1204 | 0         | 66.20% | 0.099 | IPR001442 (SMART); IPR001442 (G3DSA:2.170.240.GENE3D); IPR001442 (PFAM); IPR008160 (PFAM); PTHR24023 (PANTHER); PTHR24023:SF397 (PANTHER); IPR001442 (PROSITE_PROFILES); IPR016187 (SUPERFAMILY); IPR016187 (SUPERFAMILY)                                                                                                                                                                                                                                                                                                                                                                                                                                                               |
| 2615 | c69430_g1_i1_len_3614_path_1_0_3613_4                                    | 195 | mucin 17-like protein                                                                                                                                                      | 1205 | 3.19E-116 | 43.20% | 0.219 | no IPS match                                                                                                                                                                                                                                                                                                                                                                                                                                                                                                                                                                                                                                                                            |
| 2616 | c69431_g1_i1_len_604_path_1_0_603_1                                      | 16  | peptidyl-alpha-hydroxyglycine alpha-amidating lyase 2-like                                                                                                                 | 201  | 5.55E-25  | 63.20% | 0.239 | PTHR10680 (PANTHER)                                                                                                                                                                                                                                                                                                                                                                                                                                                                                                                                                                                                                                                                     |
| 2617 | c69434_g1_i1_len_349_path_327_0_348_1                                    | 4   | tubulointerstitial nephritis antigen-like                                                                                                                                  | 116  | 4.50E-34  | 64.40% | 0.254 | IPR001212 (PFAM); PTHR12411:SF15 (PANTHER); IPR013128 (PANTHER); IPR001212 (PROSITE_PATTERNS)                                                                                                                                                                                                                                                                                                                                                                                                                                                                                                                                                                                           |
| 2618 | c69451_g1_i1_len_358_path_336_0_357_1                                    | 6   | protein fam132a-like isoform x1                                                                                                                                            | 119  | 1.64E-25  | 64.50% | 0.121 | IPR006052 (PFAM); IPR008983 (G3DSA:2.60.120.GENE3D); PTHR24019:SF9 (PANTHER); PTHR24019 (PANTHER); IPR001073 (PROSITE_PROFILES); IPR008983 (SUPERFAMILY)                                                                                                                                                                                                                                                                                                                                                                                                                                                                                                                                |
| 2619 | c69458_g1_i1_len_540_path_518_0_539_5                                    | 13  | transcriptional repressor ctcf                                                                                                                                             | 180  | 5.88E-108 | 89.50% | 0.1   | IPR015880 (SMART); IPR013087 (G3DSA:3.30.160.GENE3D); IPR013087 (G3DSA:3.30.160.GENE3D); PF13465 (PFAM); IPR007087 (PFAM); PTHR24375 (PANTHER); PTHR24375:SF1 (PANTHER); IPR007087 (PROSITE_PATTERNS); IPR007087 (PROSITE_PATTERNS); IPR007087 (PROSITE_PATTERNS); IPR007087 (PROSITE_PROFILES); IPR007087 (PROSITE_PROFILES); IPR007087 (PROSITE_PROFILES); IPR007087 (PROSITE_PROFILES); SSF57667 (SUPERFAMILY); SSF57667 (SUPERFAMILY); SSF57667 (SUPERFAMILY)                                                                                                                                                                                                                       |

|      |                                                  |      |                                                               |     |           |        |         |                                                                                                                                                                                                                                                                                                                                                                                                                                                       |
|------|--------------------------------------------------|------|---------------------------------------------------------------|-----|-----------|--------|---------|-------------------------------------------------------------------------------------------------------------------------------------------------------------------------------------------------------------------------------------------------------------------------------------------------------------------------------------------------------------------------------------------------------------------------------------------------------|
| 2620 | c69476_g1_i1_len_361_path_1_0_360_0              | 5    | gamma-glutamyltranspeptidase 1-like                           | 121 | 5.02E-39  | 79.60% | 0.139   | IPR000101 (PRINTS); IPR000101 (PFAM); IPR000101 (PANTHER); PTHR11686:SF8 (PANTHER); IPR029055 (SUPERFAMILY)                                                                                                                                                                                                                                                                                                                                           |
| 2621 | c6953_g1_i1_len_894_path_922_0_893_3             | 62   | abnormal spindle-like microcephaly-associated protein homolog | 298 | 4.35E-88  | 65.10% | 0.129   | PR00014 (PRINTS); IPR003599 (SMART); IPR003598 (SMART); IPR013783 (G3DSA:2.60.40.GENE3D); IPR013783 (G3DSA:2.60.40.GENE3D); IPR013783 (G3DSA:2.60.40.GENE3D); IPR003961 (PFAM); IPR013098 (PFAM); PTHR19900 (PANTHER); PTHR19900:SF44 (PANTHER); IPR007110 (PROSITE_PROFILES); IPR003961 (PROSITE_PROFILES); IPR007110 (PROSITE_PROFILES); SSF48726 (SUPERFAMILY); IPR003961 (SUPERFAMILY); SSF48726 (SUPERFAMILY)                                    |
| 2622 | c69644_g1_i1_len_293_path_271_0_292_2            | 3    | agrin-like isoform x6                                         | 97  | 3.46E-23  | 61.80% | 0.103   | IPR002350 (SMART); G3DSA:3.30.60.30 (GENE3D); IPR002350 (PFAM); PTHR10913 (PANTHER); PTHR10913:SF45 (PANTHER); IPR002350 (PROSITE_PROFILES); SSF100895 (SUPERFAMILY)                                                                                                                                                                                                                                                                                  |
| 2623 | c69660_g1_i1_len_399_path_377_0_398_4            | 6    | cbpb_astas ame: full=carboxypeptidase b                       | 133 | 4.28E-44  | 67.20% | 0.108   | IPR000834 (SMART); IPR000834 (PFAM); G3DSA:3.40.630.10 (GENE3D); PTHR11705 (PANTHER); SSF53187 (SUPERFAMILY)                                                                                                                                                                                                                                                                                                                                          |
| 2624 | c69661_g1_i1_len_422_path_1_0_421_0              | 7    | 5 -nucleotidase                                               | 141 | 7.19E-55  | 76.40% | 0.096   | IPR006179 (PRINTS); IPR008334 (G3DSA:3.90.550.GENE3D); IPR029052 (G3DSA:3.60.21.GENE3D); PTHR11575:SF21 (PANTHER); IPR006179 (PANTHER); IPR029052 (SUPERFAMILY); IPR008334 (SUPERFAMILY)                                                                                                                                                                                                                                                              |
| 2625 | c69691_g1_i1_len_422_path_1_0_421_4              | 8    | exostosin- partial                                            | 141 | 1.58E-68  | 84.20% | 0.147   | IPR015338 (PFAM); IPR029044 (G3DSA:3.90.550.GENE3D); PTHR11062 (PANTHER); IPR027673 (PTHR11062:PANTHER); IPR029044 (SUPERFAMILY)                                                                                                                                                                                                                                                                                                                      |
| 2626 | c69696_g1_i1_len_373_path_351_0_372_1            | 7    | aldehyde dehydrogenase family 16 member a1-like               | 124 | 1.68E-59  | 89.60% | 0.1     | IPR016162 (G3DSA:3.40.605.GENE3D); IPR015590 (PFAM); IPR016163 (G3DSA:3.40.309.GENE3D); PTHR11699 (PANTHER); PTHR11699:SF98 (PANTHER); IPR029510 (PROSITE_PATTERNS); IPR016161 (SUPERFAMILY)                                                                                                                                                                                                                                                          |
| 2627 | c6983_g1_i1_len_1657_path_1635_0_1656_5          | 3013 | clotting factor b-like                                        | 552 | 2.00E-66  | 60.30% | 0.299   | IPR001314 (PRINTS); IPR001254 (SMART); IPR001254 (PFAM); G3DSA:2.40.10.10 (GENE3D); G3DSA:2.40.10.10 (GENE3D); G3DSA:2.40.10.10 (GENE3D); PTHR24256 (PANTHER); IPR018114 (PROSITE_PATTERNS); IPR018114 (PROSITE_PATTERNS); NON_CYTOPLASMIC_DOMAIN (PHOBIUS); SIGNAL_PEPTIDE (PHOBIUS); SIGNAL_PEPTIDE_C_REGION (PHOBIUS); SIGNAL_PEPTIDE_N_REGION (PHOBIUS); SIGNAL_PEPTIDE_H_REGION (PHOBIUS); IPR001254 (PROSITE_PROFILES); IPR009003 (SUPERFAMILY) |
| 2628 | c69915_g1_i1_len_880_path_1_0_879_1              | 27   | maguk p55 subfamily member 7 isoform x2                       | 293 | 8.47E-152 | 79.30% | 0.111   | IPR004172 (SMART); IPR001452 (SMART); IPR001478 (SMART); IPR001478 (PFAM); IPR011511 (PFAM); IPR014775 (PFAM); G3DSA:2.30.30.40 (GENE3D); IPR001478 (G3DSA:2.30.42.GENE3D); PTHR23122:SF14 (PANTHER); PTHR23122 (PANTHER); IPR001478 (PROSITE_PROFILES); IPR004172 (PROSITE_PROFILES); IPR001452 (PROSITE_PROFILES); IPR001478 (SUPERFAMILY); IPR001452 (SUPERFAMILY); SSF101288 (SUPERFAMILY)                                                        |
| 2629 | c69969_g1_i1_len_1124_path_1102_0_1123_0         | 35   | insulin-like receptor                                         | 375 | 3.58E-116 | 64.50% | 0.11    | IPR006212 (SMART); IPR000494 (G3DSA:3.80.20.GENE3D); IPR000494 (G3DSA:3.80.20.GENE3D); G3DSA:2.10.220.10 (GENE3D); IPR006211 (PFAM); G3DSA:2.10.220.10 (GENE3D); IPR013783 (G3DSA:2.60.40.GENE3D); IPR000494 (PFAM); PTHR24416 (PANTHER); IPR028792 (PTHR24416:PANTHER); IPR009030 (SUPERFAMILY); SSF52058 (SUPERFAMILY)                                                                                                                              |
| 2630 | c69970_g1_i1_len_1261_path_1239_0_1260_5         | 64   | perlucin-like protein                                         | 420 | 6.32E-19  | 53.30% | 0.108   | IPR001304 (SMART); IPR001304 (PFAM); IPR016186 (G3DSA:3.10.100.GENE3D); PTHR22802 (PANTHER); IPR018378 (PROSITE_PATTERNS); CYTOPLASMIC_DOMAIN (PHOBIUS); TRANSMEMBRANE (PHOBIUS); NON_CYTOPLASMIC_DOMAIN (PHOBIUS); CYTOPLASMIC_DOMAIN (PHOBIUS); TRANSMEMBRANE (PHOBIUS); IPR001304 (PROSITE_PROFILES); IPR016187 (SUPERFAMILY); TMhelix (TMHMM); TMhelix (TMHMM)                                                                                    |
| 2631 | c70054_g1_i1_len_756_path_734_0_755_1            | 23   | protein toll                                                  | 252 | 9.15E-33  | 50.50% | 0.411 Y | IPR003591 (SMART); G3DSA:3.80.10.10 (GENE3D); IPR001611 (PFAM); PTHR24365:SF249 (PANTHER); PTHR24365 (PANTHER); TRANSMEMBRANE (PHOBIUS); CYTOPLASMIC_DOMAIN (PHOBIUS); NON_CYTOPLASMIC_DOMAIN (PHOBIUS); SSF52058 (SUPERFAMILY); TMhelix (TMHMM)                                                                                                                                                                                                      |
| 2632 | c70152_g1_i1_len_777_path_755_0_776_0            | 20   | gamma-glutamyltranspeptidase 1-like                           | 259 | 1.33E-48  | 54.50% | 0.285   | IPR000101 (PRINTS); IPR000101 (PFAM); IPR000101 (PANTHER); PTHR11686:SF18 (PANTHER); IPR029055 (SUPERFAMILY)                                                                                                                                                                                                                                                                                                                                          |
| 2633 | c70173_g1_i1_len_852_path_1_0_851_2              | 403  | hemagglutinin amebocyte aggregation factor-like               | 284 | 9.27E-30  | 57.60% | 0.446 Y | PF14704 (PFAM); IPR026645 (PANTHER); CYTOPLASMIC_DOMAIN (PHOBIUS); TRANSMEMBRANE (PHOBIUS); NON_CYTOPLASMIC_DOMAIN (PHOBIUS); TRANSMEMBRANE (PHOBIUS); CYTOPLASMIC_DOMAIN (PHOBIUS); TRANSMEMBRANE (PHOBIUS); NON_CYTOPLASMIC_DOMAIN (PHOBIUS)                                                                                                                                                                                                        |
| 2634 | c7030_g1_i1_len_774_path_353_0_340_728_341_773_4 | 22   | xylosylprotein beta4-                                         | 258 | 1.77E-108 | 71.50% | 0.123   | IPR003859 (PRINTS); IPR029044 (G3DSA:3.90.550.GENE3D); IPR027791 (PFAM); IPR027995 (PFAM); IPR003859 (PANTHER); IPR029044 (SUPERFAMILY)                                                                                                                                                                                                                                                                                                               |



[illegible]



|      |                                          |     |                                                |     |           |        |         |                                                                                                                                                                                                                                                                                                                                                                                                                                                                                                                                  |
|------|------------------------------------------|-----|------------------------------------------------|-----|-----------|--------|---------|----------------------------------------------------------------------------------------------------------------------------------------------------------------------------------------------------------------------------------------------------------------------------------------------------------------------------------------------------------------------------------------------------------------------------------------------------------------------------------------------------------------------------------|
| 2660 | c71796_g1_i1_len_714_path_1_0_713_0      | 12  | low quality protein: zinc finger protein gfi-1 | 238 | 8.53E-15  | 61.60% | 0.133   | IPR015880 (SMART); PF13465 (PFAM); IPR013087 (G3DSA:3.30.160.GENE3D); IPR013087 (G3DSA:3.30.160.GENE3D); PF13894 (PFAM); PTHR24409 (PANTHER); IPR007087 (PROSITE_PATTERNS); IPR007087 (PROSITE_PATTERNS); IPR007087 (PROSITE_PROFILES); IPR007087 (PROSITE_PROFILES); IPR007087 (PROSITE_PROFILES); SSF57667 (SUPERFAMILY)                                                                                                                                                                                                       |
| 2661 | c71801_g1_i1_len_501_path_479_0_500_3    | 16  | inversin- partial                              | 167 | 7.65E-51  | 71.60% | 0.360 Y | IPR002110 (SMART); IPR020683 (G3DSA:1.25.40.GENE3D); IPR020683 (PFAM); IPR020683 (G3DSA:1.25.40.GENE3D); IPR002110 (PFAM); PTHR24178 (PANTHER); SIGNAL_PEPTIDE_C_REGION (PHOBIUS); SIGNAL_PEPTIDE_N_REGION (PHOBIUS); SIGNAL_PEPTIDE (PHOBIUS); NON_CYTOPLASMIC_DOMAIN (PHOBIUS); SIGNAL_PEPTIDE_H_REGION (PHOBIUS); IPR002110 (PROSITE_PROFILES); IPR002110 (PROSITE_PROFILES); IPR002110 (PROSITE_PROFILES); IPR020683 (PROSITE_PROFILES); IPR002110 (PROSITE_PROFILES); IPR002110 (PROSITE_PROFILES); IPR020683 (SUPERFAMILY) |
| 2662 | c71870_g1_i1_len_816_path_794_0_815_2    | 19  | deleted in autism protein 1                    | 272 | 5.88E-58  | 55.30% | 0.121   | IPR022049 (PFAM); PTHR32073:SF7 (PANTHER); PTHR32073 (PANTHER); IPR020519 (PRODOM); IPR011009 (SUPERFAMILY)                                                                                                                                                                                                                                                                                                                                                                                                                      |
| 2663 | c72084_g1_i1_len_972_path_950_0_971_3    | 24  | 85 88 kda calcium-independent phospholipase a2 | 324 | 6.25E-75  | 64.10% | 0.234   | IPR002110 (PRINTS); IPR002110 (SMART); IPR020683 (PFAM); IPR020683 (G3DSA:1.25.40.GENE3D); PTHR24139 (PANTHER); PTHR24139:SF33 (PANTHER); IPR020683 (PROSITE_PROFILES); IPR002110 (PROSITE_PROFILES); IPR002110 (PROSITE_PROFILES); IPR020683 (SUPERFAMILY)                                                                                                                                                                                                                                                                      |
| 2664 | c72110_g1_i1_len_848_path_826_0_847_5    | 24  | neuroligin- y-linked                           | 282 | 2.87E-115 | 76.50% | 0.167   | IPR002018 (PFAM); IPR029058 (G3DSA:3.40.50.GENE3D); PTHR11559:SF157 (PANTHER); PTHR11559 (PANTHER); IPR029058 (SUPERFAMILY)                                                                                                                                                                                                                                                                                                                                                                                                      |
| 2665 | c72198_g1_i1_len_393_path_1_0_392_0      | 17  | lipophorin receptor                            | 131 | 2.88E-07  | 48.25% | 0.104   | IPR002172 (SMART); IPR002172 (G3DSA:4.10.400.GENE3D); IPR002172 (PFAM); IPR023415 (PROSITE_PATTERNS); NON_CYTOPLASMIC_DOMAIN (PHOBIUS); TRANSMEMBRANE (PHOBIUS); CYTOPLASMIC_DOMAIN (PHOBIUS); IPR002172 (PROSITE_PROFILES); IPR002172 (SUPERFAMILY); TMhelix (TMHMM)                                                                                                                                                                                                                                                            |
| 2666 | c72301_g1_i1_len_598_path_576_0_597_0    | 298 | histone h2a-like                               | 200 | 1.13E-79  | 97.30% | 0.246   | IPR002119 (PRINTS); IPR002119 (SMART); IPR007125 (PFAM); IPR009072 (G3DSA:1.10.20.GENE3D); PTHR23430:SF45 (PANTHER); PTHR23430 (PANTHER); IPR002119 (PROSITE_PATTERNS); IPR009072 (SUPERFAMILY)                                                                                                                                                                                                                                                                                                                                  |
| 2667 | c72365_g1_i1_len_315_path_1_0_314_1      | 6   | pancreatic triacylglycerol lipase-like         | 105 | 1.67E-43  | 79.60% | 0.212   | IPR000734 (PRINTS); IPR029058 (G3DSA:3.40.50.GENE3D); IPR013818 (PFAM); IPR000734 (PANTHER); PTHR11610:SF8 (PANTHER); IPR029058 (SUPERFAMILY)                                                                                                                                                                                                                                                                                                                                                                                    |
| 2668 | c72415_g1_i1_len_1102_path_1080_0_1101_1 | 33  | zinc finger protein 492-like                   | 367 | 2.55E-22  | 71.80% | 0.116   | IPR015880 (SMART); PF13465 (PFAM); IPR013087 (G3DSA:3.30.160.GENE3D); IPR013087 (G3DSA:3.30.160.GENE3D); PTHR24409 (PANTHER); IPR007087 (PROSITE_PATTERNS); IPR007087 (PROSITE_PATTERNS); TRANSMEMBRANE (PHOBIUS); NON_CYTOPLASMIC_DOMAIN (PHOBIUS); NON_CYTOPLASMIC_DOMAIN (PHOBIUS); CYTOPLASMIC_DOMAIN (PHOBIUS); TRANSMEMBRANE (PHOBIUS); CYTOPLASMIC_DOMAIN (PHOBIUS); IPR007087 (PROSITE_PROFILES); IPR007087 (PROSITE_PROFILES); SSF57667 (SUPERFAMILY); TMhelix (TMHMM); TMhelix (TMHMM); TMhelix (TMHMM)                |
| 2669 | c72512_g1_i1_len_350_path_328_0_349_1    | 10  | gastrula zinc finger                           | 117 | 3.97E-34  | 70.60% | 0.099   | IPR015880 (SMART); PF13912 (PFAM); IPR007087 (PFAM); IPR013087 (G3DSA:3.30.160.GENE3D); IPR013087 (G3DSA:3.30.160.GENE3D); IPR013087 (G3DSA:3.30.160.GENE3D); PF13465 (PFAM); PTHR24409 (PANTHER); IPR007087 (PROSITE_PATTERNS); IPR007087 (PROSITE_PATTERNS); IPR007087 (PROSITE_PATTERNS); IPR007087 (PROSITE_PATTERNS); IPR007087 (PROSITE_PROFILES); IPR007087 (PROSITE_PROFILES); IPR007087 (PROSITE_PROFILES); IPR007087 (PROSITE_PROFILES); SSF57667 (SUPERFAMILY); SSF57667 (SUPERFAMILY); SSF57667 (SUPERFAMILY)        |
| 2670 | c72540_g1_i1_len_333_path_313_0_332_4    | 3   | zinc finger and btb domain-containing protein  | 111 | 6.41E-17  | 59.60% | 0.098   | IPR015880 (SMART); IPR013087 (G3DSA:3.30.160.GENE3D); PF13465 (PFAM); IPR013087 (G3DSA:3.30.160.GENE3D); IPR013087 (G3DSA:3.30.160.GENE3D); PTHR24409 (PANTHER); IPR007087 (PFAM); PTHR24409 (PANTHER); PTHR24409:SF14 (PANTHER); IPR007087 (PROSITE_PATTERNS); IPR007087 (PROSITE_PATTERNS); IPR007087 (PROSITE_PATTERNS); IPR007087 (PROSITE_PROFILES); IPR007087 (PROSITE_PROFILES); IPR007087 (PROSITE_PROFILES); IPR007087 (PROSITE_PROFILES); SSF57667 (SUPERFAMILY); SSF57667 (SUPERFAMILY)                               |

|      |                                                                  |     |                                              |     |           |        |        |                                                                                                                                                                                                                                                                                                                                                                                                                                                                                                                                                                              |
|------|------------------------------------------------------------------|-----|----------------------------------------------|-----|-----------|--------|--------|------------------------------------------------------------------------------------------------------------------------------------------------------------------------------------------------------------------------------------------------------------------------------------------------------------------------------------------------------------------------------------------------------------------------------------------------------------------------------------------------------------------------------------------------------------------------------|
| 2671 | c72545_g1_i1_len_651_path_565_0_476_104_2_477_563_1042_564_650_4 | 28  | gastrula zinc finger protein - partial       | 217 | 2.68E-33  | 53.00% | 0.1    | IPR015880 (SMART); PF13894 (PFAM); IPR007087 (PFAM); IPR013087 (G3DSA:3.30.160.GENE3D); IPR013087 (G3DSA:3.30.160.GENE3D); PF13465 (PFAM); PTHR24409 (PANTHER); PTHR24409:SF14 (PANTHER); IPR007087 (PROSITE_PATTERNS); IPR007087 (PROSITE_PATTERNS); IPR007087 (PROSITE_PATTERNS); IPR007087 (PROSITE_PATTERNS); IPR007087 (PROSITE_PATTERNS); IPR007087 (PROSITE_PROFILES); IPR007087 (PROSITE_PROFILES); IPR007087 (PROSITE_PROFILES); IPR007087 (PROSITE_PROFILES); IPR007087 (PROSITE_PROFILES); SSF57667 (SUPERFAMILY); SSF57667 (SUPERFAMILY); SSF57667 (SUPERFAMILY) |
| 2672 | c7262_g1_i1_len_1914_path_1892_0_1913_1                          | 595 | dorsal-ventral patterning protein tolloid    | 638 | 0         | 79.50% | 0.192  | Coil (COILS); IPR001506 (PRINTS); IPR006026 (SMART); IPR000859 (SMART); IPR000859 (G3DSA:2.60.120.GENE3D); IPR001506 (PFAM); IPR024079 (G3DSA:3.40.390.GENE3D); IPR000859 (PFAM); PTHR10127:SF304 (PANTHER); PTHR10127 (PANTHER); IPR000859 (PROSITE_PROFILES); IPR000859 (PROSITE_PROFILES); SSF55486 (SUPERFAMILY); IPR000859 (SUPERFAMILY)                                                                                                                                                                                                                                |
| 2673 | c72656_g1_i1_len_596_path_1_0_595_5                              | 24  | gastrula zinc finger                         | 198 | 3.75E-23  | 63.50% | 0.107  | IPR015880 (SMART); IPR013087 (G3DSA:3.30.160.GENE3D); PF13465 (PFAM); IPR013087 (G3DSA:3.30.160.GENE3D); IPR013087 (G3DSA:3.30.160.GENE3D); PTHR24409 (PANTHER); IPR007087 (PROSITE_PATTERNS); IPR007087 (PROSITE_PATTERNS); IPR007087 (PROSITE_PATTERNS); IPR007087 (PROSITE_PROFILES); IPR007087 (PROSITE_PROFILES); IPR007087 (PROSITE_PROFILES); SSF57667 (SUPERFAMILY); SSF57667 (SUPERFAMILY)                                                                                                                                                                          |
| 2674 | c72720_g1_i1_len_264_path_1_0_263_0                              | 4   | cd4-specific ankyrin repeat protein          | 88  | 4.45E-13  | 60.80% | 0.113  | IPR002110 (SMART); IPR020683 (G3DSA:1.25.40.GENE3D); IPR020683 (PFAM); PTHR24182 (PANTHER); IPR002110 (PROSITE_PROFILES); IPR002110 (PROSITE_PROFILES); IPR020683 (PROSITE_PROFILES); IPR020683 (SUPERFAMILY)                                                                                                                                                                                                                                                                                                                                                                |
| 2675 | c72727_g1_i1_len_351_path_1_0_350_5                              | 9   | carboxypeptidase e                           | 117 | 4.40E-28  | 66.00% | 0.108  | PF13620 (PFAM); IPR014766 (G3DSA:2.60.40.GENE3D); PTHR11532 (PANTHER); IPR008969 (SUPERFAMILY)                                                                                                                                                                                                                                                                                                                                                                                                                                                                               |
| 2676 | c72856_g1_i1_len_428_path_406_0_427_0                            | 5   | transient receptor potential channel pyrexia | 143 | 1.12E-56  | 78.70% | 0.137  | IPR002110 (SMART); IPR020683 (G3DSA:1.25.40.GENE3D); IPR020683 (PFAM); PTHR24161 (PANTHER); IPR030288 (PTHR24161:PANTHER); IPR002110 (PROSITE_PROFILES); IPR020683 (PROSITE_PROFILES); IPR002110 (PROSITE_PROFILES); IPR020683 (SUPERFAMILY)                                                                                                                                                                                                                                                                                                                                 |
| 2677 | c72912_g1_i1_len_625_path_603_0_624_0                            | 30  | low quality protein: titin-like              | 209 | 3.86E-55  | 62.40% | 0.124  | IPR013783 (G3DSA:2.60.40.GENE3D); IPR013783 (G3DSA:2.60.40.GENE3D); IPR013783 (G3DSA:2.60.40.GENE3D); IPR013098 (PFAM); PTHR19897 (PANTHER); IPR007110 (PROSITE_PROFILES); SSF48726 (SUPERFAMILY); SSF48726 (SUPERFAMILY); SSF48726 (SUPERFAMILY)                                                                                                                                                                                                                                                                                                                            |
| 2678 | c7293_g1_i1_len_665_path_643_0_664_2                             | 71  | trypsinogen 2                                | 221 | 1.02E-73  | 66.60% | 0.888Y | IPR001314 (PRINTS); IPR001254 (SMART); G3DSA:2.40.10.10 (GENE3D); G3DSA:2.40.10.10 (GENE3D); IPR001254 (PFAM); G3DSA:2.40.10.10 (GENE3D); PTHR24276 (PANTHER); SIGNAL_PEPTIDE (PHOBIUS); SIGNAL_PEPTIDE_N_REGION (PHOBIUS); NON_CYTOPLASMIC_DOMAIN (PHOBIUS); SIGNAL_PEPTIDE_H_REGION (PHOBIUS); SIGNAL_PEPTIDE_C_REGION (PHOBIUS); IPR001254 (PROSITE_PROFILES); SignalP-noTM (SIGNALP_GRAM_NEGATIVE); SignalP-TM (SIGNALP_GRAM_POSITIVE); SignalP-noTM (SIGNALP_EUK); IPR009003 (SUPERFAMILY); TMhelix (TMHMM)                                                             |
| 2679 | c7293_g2_i1_len_219_path_1285_0_218_0                            | 13  | transmembrane protease serine 13             | 73  | 1.70E-14  | 75.90% | 0.106  | G3DSA:2.40.10.10 (GENE3D); IPR001254 (PFAM); PTHR24256 (PANTHER); IPR001254 (PROSITE_PROFILES); IPR009003 (SUPERFAMILY)                                                                                                                                                                                                                                                                                                                                                                                                                                                      |
| 2680 | c73016_g1_i1_len_798_path_776_0_797_1                            | 20  | zinc finger protein 316-like                 | 266 | 3.75E-12  | 67.30% | 0.191  | IPR015880 (SMART); IPR013087 (G3DSA:3.30.160.GENE3D); IPR013087 (G3DSA:3.30.160.GENE3D); PF13465 (PFAM); PTHR24409 (PANTHER); IPR007087 (PROSITE_PATTERNS); IPR007087 (PROSITE_PROFILES); IPR007087 (PROSITE_PROFILES); SSF57667 (SUPERFAMILY)                                                                                                                                                                                                                                                                                                                               |
| 2681 | c73107_g1_i1_len_810_path_1_0_809_1                              | 11  | GK10945                                      | 270 | 9.63E-20  | 76.60% | 0.1    | IPR001916 (PRINTS); IPR001916 (SMART); G3DSA:1.10.530.10 (GENE3D); IPR001916 (PFAM); PTHR11407 (PANTHER); IPR001916 (PROSITE_PROFILES); IPR023346 (SUPERFAMILY)                                                                                                                                                                                                                                                                                                                                                                                                              |
| 2682 | c73234_g1_i1_len_627_path_605_0_626_0                            | 14  | ephrin-b2 isoform x1                         | 209 | 6.94E-89  | 80.90% | 0.105  | IPR001799 (PRINTS); IPR001799 (PFAM); IPR008972 (G3DSA:2.60.40.GENE3D); IPR001799 (PANTHER); PTHR11304:SF29 (PANTHER); IPR001799 (PRODOM); IPR001799 (PROSITE_PROFILES); IPR008972 (SUPERFAMILY)                                                                                                                                                                                                                                                                                                                                                                             |
| 2683 | c73248_g1_i1_len_780_path_758_0_779_3                            | 44  | beta- -galactosyltransferase 7               | 260 | 1.88E-122 | 81.50% | 0.102  | IPR003859 (PRINTS); IPR027995 (PFAM); IPR027791 (PFAM); IPR029044 (G3DSA:3.90.550.GENE3D); IPR003859 (PANTHER); PTHR19300:SF1 (PANTHER); IPR029044 (SUPERFAMILY)                                                                                                                                                                                                                                                                                                                                                                                                             |

|      |                                                  |      |                                                                  |     |           |        |         |                                                                                                                                                                                                                                                                                                                                                                                                                                                                                                        |
|------|--------------------------------------------------|------|------------------------------------------------------------------|-----|-----------|--------|---------|--------------------------------------------------------------------------------------------------------------------------------------------------------------------------------------------------------------------------------------------------------------------------------------------------------------------------------------------------------------------------------------------------------------------------------------------------------------------------------------------------------|
| 2684 | c73295_g1_i1_len_1235_path_1_0_1234_5            | 39   | liver carboxylesterase 2-like                                    | 411 | 4.97E-24  | 50.60% | 0.109   | IPR002018 (PFAM); IPR029058 (G3DSA:3.40.50.GENE3D); PTHR11559 (PANTHER); PTHR11559:SF157 (PANTHER); CYTOPLASMIC_DOMAIN (PHOBIUS); NON_CYTOPLASMIC_DOMAIN (PHOBIUS); TRANSMEMBRANE (PHOBIUS); IPR029058 (SUPERFAMILY); TMhelix (TMHMM)                                                                                                                                                                                                                                                                  |
| 2685 | c73313_g1_i1_len_774_path_752_0_773_0            | 1436 | kazal-type serine proteinase inhibitor 3                         | 258 | 3.94E-24  | 56.90% | 0.504Y  | IPR002350 (SMART); IPR002350 (PFAM); IPR002350 (PFAM); G3DSA:3.30.60.30 (GENE3D); G3DSA:3.30.60.30 (GENE3D); PTHR10913:SF46 (PANTHER); PTHR10913 (PANTHER); NON_CYTOPLASMIC_DOMAIN (PHOBIUS); CYTOPLASMIC_DOMAIN (PHOBIUS); CYTOPLASMIC_DOMAIN (PHOBIUS); TRANSMEMBRANE (PHOBIUS); TRANSMEMBRANE (PHOBIUS); IPR002350 (PROSITE_PROFILES); IPR002350 (PROSITE_PROFILES); SignalIP-TM (SIGNALP_EUK); SSF100895 (SUPERFAMILY); SSF100895 (SUPERFAMILY); TMhelix (TMHMM); TMhelix (TMHMM); TMhelix (TMHMM) |
| 2686 | c73410_g1_i1_len_514_path_492_0_513_2            | 15   | carboxypeptidase b-like                                          | 171 | 1.30E-26  | 56.20% | 0.678Y  | G3DSA:3.40.630.10 (GENE3D); IPR003146 (G3DSA:3.30.70.GENE3D); IPR003146 (PFAM); PTHR11705 (PANTHER); NON_CYTOPLASMIC_DOMAIN (PHOBIUS); SIGNAL_PEPTIDE (PHOBIUS); SIGNAL_PEPTIDE_N_REGION (PHOBIUS); SIGNAL_PEPTIDE_H_REGION (PHOBIUS); SIGNAL_PEPTIDE_C_REGION (PHOBIUS); SignalP-noTM (SIGNALP_EUK); IPR009020 (SUPERFAMILY)                                                                                                                                                                          |
| 2687 | c73414_g1_i1_len_407_path_1_0_406_4              | 56   | protein                                                          | 136 | 3.34E-30  | 82.60% | 0.444 Y | no IPS match                                                                                                                                                                                                                                                                                                                                                                                                                                                                                           |
| 2688 | c73455_g1_i1_len_1052_path_1_0_1051_1            | 239  | ---NA---                                                         | 351 |           |        | 0.108   | Coil (COILS); TRANSMEMBRANE (PHOBIUS); CYTOPLASMIC_DOMAIN (PHOBIUS); NON_CYTOPLASMIC_DOMAIN (PHOBIUS)                                                                                                                                                                                                                                                                                                                                                                                                  |
| 2689 | c73458_g1_i1_len_783_path_761_0_782_0            | 27   | protein phosphatase 1 regulatory subunit 16a isoform x4          | 261 | 2.69E-105 | 77.60% | 0.103   | IPR002110 (SMART); IPR020683 (G3DSA:1.25.40.GENE3D); IPR020683 (PFAM); PTHR24186 (PANTHER); IPR002110 (PROSITE_PROFILES); IPR020683 (PROSITE_PROFILES); IPR002110 (PROSITE_PROFILES); IPR002110 (PROSITE_PROFILES); IPR020683 (SUPERFAMILY)                                                                                                                                                                                                                                                            |
| 2690 | c73536_g1_i1_len_201_path_1_0_200_4              | 2    | isoform a                                                        | 67  | 1.13E-25  | 89.90% | 0.139   | IPR024079 (G3DSA:3.40.390.GENE3D); PTHR11905 (PANTHER); PTHR11905:SF121 (PANTHER); SSF55486 (SUPERFAMILY)                                                                                                                                                                                                                                                                                                                                                                                              |
| 2691 | c73607_g1_i1_len_608_path_1_0_607_5              | 17   | leucine-rich repeat-containing protein 15-like                   | 202 | 8.45E-32  | 53.50% | 0.205   | IPR003591 (SMART); G3DSA:3.80.10.10 (GENE3D); G3DSA:3.80.10.10 (GENE3D); IPR001611 (PFAM); PTHR24373 (PANTHER); IPR001611 (PROSITE_PROFILES); IPR001611 (PROSITE_PROFILES); IPR001611 (PROSITE_PROFILES); IPR001611 (PROSITE_PROFILES); IPR001611 (PROSITE_PROFILES); IPR001611 (PROSITE_PROFILES); SSF52058 (SUPERFAMILY)                                                                                                                                                                             |
| 2692 | c73736_g1_i1_len_273_path_251_0_272_5            | 6    | leucine-rich repeat-containing protein 19-like isoform x1        | 91  | 9.53E-10  | 58.80% | 0.123   | PR00019 (PRINTS); IPR003591 (SMART); G3DSA:3.80.10.10 (GENE3D); IPR001611 (PFAM); PTHR24365:SF265 (PANTHER); PTHR24365 (PANTHER); IPR001611 (PROSITE_PROFILES); IPR001611 (PROSITE_PROFILES); SSF52058 (SUPERFAMILY)                                                                                                                                                                                                                                                                                   |
| 2693 | c73773_g1_i1_len_140_path_2_0_139_5              | 0    | very low-density lipoprotein receptor                            | 46  | 1.40E-07  | 71.40% | 0.111   | IPR002172 (SMART); IPR002172 (G3DSA:4.10.400.GENE3D); IPR002172 (PFAM); IPR023415 (PROSITE_PATTERNS); IPR002172 (PROSITE_PROFILES); IPR002172 (SUPERFAMILY)                                                                                                                                                                                                                                                                                                                                            |
| 2694 | c73784_g1_i1_len_352_path_1_0_351_4              | 11   | zinc finger and scan domain-containing protein 2-like isoform x1 | 117 | 1.15E-64  | 87.60% | 0.103   | IPR015880 (SMART); IPR013087 (G3DSA:3.30.160.GENE3D); IPR013087 (G3DSA:3.30.160.GENE3D); IPR013087 (G3DSA:3.30.160.GENE3D); PF13465 (PFAM); PTHR24409 (PANTHER); IPR007087 (PROSITE_PATTERNS); IPR007087 (PROSITE_PATTERNS); IPR007087 (PROSITE_PATTERNS); IPR007087 (PROSITE_PROFILES); IPR007087 (PROSITE_PROFILES); IPR007087 (PROSITE_PROFILES); SSF57667 (SUPERFAMILY); SSF57667 (SUPERFAMILY)                                                                                                    |
| 2695 | c73835_g1_i1_len_686_path_1_0_685_2              | 11   | pr domain zinc finger protein 4                                  | 228 | 2.73E-31  | 69.50% | 0.105   | IPR015880 (SMART); IPR013087 (G3DSA:3.30.160.GENE3D); PF13894 (PFAM); IPR013087 (G3DSA:3.30.160.GENE3D); IPR007087 (PFAM); IPR027775 (PANTHER); PTHR10032:SF157 (PANTHER); IPR007087 (PROSITE_PATTERNS); IPR007087 (PROSITE_PATTERNS); IPR007087 (PROSITE_PROFILES); IPR007087 (PROSITE_PROFILES); SSF57667 (SUPERFAMILY)                                                                                                                                                                              |
| 2696 | c73853_g1_i1_len_530_path_508_0_529_2            | 8    | papain family cysteine protease containing protein               | 176 | 5.66E-30  | 53.60% | 0.155   | IPR000668 (SMART); IPR000668 (PFAM); G3DSA:3.90.70.10 (GENE3D); IPR013128 (PANTHER); PTHR12411:SF316 (PANTHER); IPR025660 (PROSITE_PATTERNS); SSF54001 (SUPERFAMILY)                                                                                                                                                                                                                                                                                                                                   |
| 2697 | c73920_g1_i1_len_1204_path_1_0_1203_0            | 65   | ste20-related kinase adapter protein alpha                       | 402 | 1.39E-145 | 65.70% | 0.098   | G3DSA:3.30.200.20 (GENE3D); G3DSA:1.10.510.10 (GENE3D); IPR000719 (PFAM); PTHR24361:SF273 (PANTHER); PTHR24361 (PANTHER); IPR000719 (PROSITE_PROFILES); IPR011009 (SUPERFAMILY)                                                                                                                                                                                                                                                                                                                        |
| 2698 | c7398_g1_i2_len_294_path_272_0_175_448_176_293_3 | 8    | abl interactor 2 isoform x1                                      | 98  | 7.51E-39  | 86.60% | 0.099   | IPR001452 (PRINTS); IPR001452 (SMART); IPR001452 (PFAM); G3DSA:2.30.30.40 (GENE3D); IPR028457 (PANTHER); IPR001452 (PROSITE_PROFILES); IPR001452 (SUPERFAMILY)                                                                                                                                                                                                                                                                                                                                         |



[illegible]

|      |                                                    |      |                                                                    |     |           |        |        |                                                                                                                                                                                                                                                                                                                                                                                                                                                                                                                                                                                                                                   |
|------|----------------------------------------------------|------|--------------------------------------------------------------------|-----|-----------|--------|--------|-----------------------------------------------------------------------------------------------------------------------------------------------------------------------------------------------------------------------------------------------------------------------------------------------------------------------------------------------------------------------------------------------------------------------------------------------------------------------------------------------------------------------------------------------------------------------------------------------------------------------------------|
| 2713 | c75151_g1_i1_len_690_path_668_0_689_4              | 7    | zinc finger protein zfat-like                                      | 230 | 3.57E-28  | 62.90% | 0.719Y | IPR015880 (SMART); PF13894 (PFAM); PF13465 (PFAM); IPR013087 (G3DSA:3.30.160.GENE3D); IPR013087 (G3DSA:3.30.160.GENE3D); PTHR24409 (PANTHER); TRANSMEMBRANE (PHOBIUS); NON_CYTOPLASMIC_DOMAIN (PHOBIUS); CYTOPLASMIC_DOMAIN (PHOBIUS); IPR007087 (PROSITE_PROFILES); IPR007087 (PROSITE_PROFILES); SignalP-noTM (SIGNALP_EUK); SSF57667 (SUPERFAMILY); SSF57667 (SUPERFAMILY); TMhelix (TMHMM)                                                                                                                                                                                                                                    |
| 2714 | c75203_g1_i1_len_1022_path_1000_0_1021_3           | 31   | shootin-1                                                          | 341 | 1.70E-26  | 52.70% | 0.108  | Coil (COILS); Coil (COILS); Coil (COILS)                                                                                                                                                                                                                                                                                                                                                                                                                                                                                                                                                                                          |
| 2715 | c75245_g1_i1_len_818_path_1_0_817_5                | 24   | asparagine-rich zinc finger protein azf1-like isoform x2           | 272 | 5.90E-65  | 69.00% | 0.103  | IPR015880 (SMART); IPR013087 (G3DSA:3.30.160.GENE3D); IPR007087 (PFAM); PF13465 (PFAM); IPR013087 (G3DSA:3.30.160.GENE3D); IPR013087 (G3DSA:3.30.160.GENE3D); PTHR24409 (PANTHER); IPR007087 (PROSITE_PATTERNS); IPR007087 (PROSITE_PATTERNS); IPR007087 (PROSITE_PATTERNS); IPR007087 (PROSITE_PATTERNS); IPR007087 (PROSITE_PATTERNS); IPR007087 (PROSITE_PATTERNS); IPR007087 (PROSITE_PROFILES); IPR007087 (PROSITE_PROFILES); IPR007087 (PROSITE_PROFILES); IPR007087 (PROSITE_PROFILES); IPR007087 (PROSITE_PROFILES); IPR007087 (PROSITE_PROFILES); SSF57667 (SUPERFAMILY); SSF57667 (SUPERFAMILY); SSF57667 (SUPERFAMILY) |
| 2716 | c7546_g1_i1_len_801_path_1_0_800_5                 | 36   | down syndrome cell adhesion molecule-like protein dscam2           | 267 | 6.39E-136 | 84.30% | 0.102  | IPR003961 (SMART); IPR003599 (SMART); IPR003598 (SMART); IPR013098 (PFAM); IPR013783 (G3DSA:2.60.40.GENE3D); IPR003961 (PFAM); IPR013783 (G3DSA:2.60.40.GENE3D); PTHR10489 (PANTHER); PTHR10489:SF567 (PANTHER); IPR007110 (PROSITE_PROFILES); IPR003961 (PROSITE_PROFILES); IPR003961 (PROSITE_PROFILES); SSF48726 (SUPERFAMILY); IPR003961 (SUPERFAMILY)                                                                                                                                                                                                                                                                        |
| 2717 | c75553_g1_i1_len_296_path_1_0_295_4                | 13   | retinol dehydrogenase 14-like                                      | 99  | 6.23E-10  | 63.20% | 0.119  | PTHR24320 (PANTHER)                                                                                                                                                                                                                                                                                                                                                                                                                                                                                                                                                                                                               |
| 2718 | c75590_g1_i1_len_413_path_391_0_412_2              | 7    | mitogen-activated protein kinase-binding protein 1-like isoform x1 | 137 | 1.68E-63  | 86.80% | 0.137  | IPR001680 (SMART); IPR001680 (PFAM); IPR015943 (G3DSA:2.130.10.GENE3D); PTHR22847 (PANTHER); PTHR22847:SF332 (PANTHER); IPR017986 (PROSITE_PROFILES); IPR017986 (SUPERFAMILY)                                                                                                                                                                                                                                                                                                                                                                                                                                                     |
| 2719 | c75608_g1_i1_len_814_path_792_0_813_0              | 24   | cytochrome p450 18a1                                               | 272 | 1.12E-101 | 77.80% | 0.12   | IPR002401 (PRINTS); IPR001128 (PRINTS); IPR001128 (PFAM); IPR001128 (G3DSA:1.10.630.GENE3D); PTHR24300:SF116 (PANTHER); PTHR24300 (PANTHER); IPR017972 (PROSITE_PATTERNS); IPR001128 (SUPERFAMILY)                                                                                                                                                                                                                                                                                                                                                                                                                                |
| 2720 | c75665_g1_i1_len_494_path_472_0_493_1              | 8    | 17-beta-hydroxysteroid dehydrogenase 13-like                       | 165 | 1.49E-40  | 70.00% | 0.129  | IPR002347 (PRINTS); IPR002198 (PFAM); IPR016040 (G3DSA:3.40.50.GENE3D); PTHR24316 (PANTHER); PTHR24316:SF214 (PANTHER); TRANSMEMBRANE (PHOBIUS); CYTOPLASMIC_DOMAIN (PHOBIUS); NON_CYTOPLASMIC_DOMAIN (PHOBIUS); SSF51735 (SUPERFAMILY); TMhelix (TMHMM)                                                                                                                                                                                                                                                                                                                                                                          |
| 2721 | c75806_g1_i1_len_426_path_404_0_425_3              | 6    | gamma-glutamyl hydrolase-like                                      | 142 | 3.68E-20  | 69.50% | 0.111  | IPR029062 (G3DSA:3.40.50.GENE3D); IPR011697 (PFAM); IPR015527 (PANTHER); PTHR11315:SF2 (PANTHER); NON_CYTOPLASMIC_DOMAIN (PHOBIUS); TRANSMEMBRANE (PHOBIUS); CYTOPLASMIC_DOMAIN (PHOBIUS); IPR015527 (PROSITE_PROFILES); IPR029062 (SUPERFAMILY); TMhelix (TMHMM)                                                                                                                                                                                                                                                                                                                                                                 |
| 2722 | c75881_g1_i1_len_711_path_689_0_710_1              | 26   | dipeptidyl peptidase 9 isoform x1                                  | 237 | 1.17E-103 | 75.60% | 0.18   | IPR002469 (G3DSA:2.140.10.GENE3D); IPR002469 (PFAM); IPR029058 (G3DSA:3.40.50.GENE3D); PTHR11731 (PANTHER); PTHR11731:SF110 (PANTHER); IPR029058 (SUPERFAMILY); SSF82171 (SUPERFAMILY)                                                                                                                                                                                                                                                                                                                                                                                                                                            |
| 2723 | c7610_g1_i1_len_1554_path_41_0_1457_40_1458_1553_0 | 1804 | p-selectin- partial                                                | 518 | 4.21E-14  | 40.00% | 0.374Y | IPR000436 (SMART); G3DSA:2.10.70.10 (GENE3D); IPR000436 (PFAM); G3DSA:2.10.70.10 (GENE3D); G3DSA:2.10.70.10 (GENE3D); PTHR19325:SF321 (PANTHER); PTHR19325 (PANTHER); NON_CYTOPLASMIC_DOMAIN (PHOBIUS); TRANSMEMBRANE (PHOBIUS); CYTOPLASMIC_DOMAIN (PHOBIUS); IPR000436 (PROSITE_PROFILES); IPR000436 (PROSITE_PROFILES); IPR000436 (PROSITE_PROFILES); IPR000436 (PROSITE_PROFILES); IPR000436 (PROSITE_PROFILES); IPR000436 (SUPERFAMILY); TMhelix (TMHMM)                                                                                                                                                                     |
| 2724 | c76148_g1_i1_len_581_path_1_0_580_2                | 19   | transforming growth factor-beta-induced protein ig-h3-like         | 193 | 6.84E-83  | 65.40% | 0.102  | IPR000782 (SMART); IPR000782 (PFAM); IPR000782 (G3DSA:2.30.180.GENE3D); PTHR10900:SF73 (PANTHER); PTHR10900 (PANTHER); IPR011489 (PROSITE_PROFILES); IPR000782 (PROSITE_PROFILES); IPR000782 (SUPERFAMILY)                                                                                                                                                                                                                                                                                                                                                                                                                        |
| 2725 | c7622_g1_i1_len_317_path_295_0_76_372_7_7_316_4    | 10   | carboxypeptidase partial                                           | 106 | 7.65E-29  | 75.10% | 0.11   | G3DSA:3.40.630.10 (GENE3D); IPR000834 (PFAM); PTHR11705 (PANTHER); SSF53187 (SUPERFAMILY)                                                                                                                                                                                                                                                                                                                                                                                                                                                                                                                                         |
| 2726 | c7631_g1_i1_len_1191_path_1169_0_1190_2            | 168  | peroxisomal trans-2-enoyl- reductase-like                          | 397 | 1.05E-126 | 74.10% | 0.135  | IPR002347 (PRINTS); PF13561 (PFAM); IPR016040 (G3DSA:3.40.50.GENE3D); PTHR24317 (PANTHER); SSF51735 (SUPERFAMILY)                                                                                                                                                                                                                                                                                                                                                                                                                                                                                                                 |

|      |                                                   |     |                                                                     |     |           |        |       |                                                                                                                                                                                                                                                                                                                                                                                                                                                                                                                                                    |
|------|---------------------------------------------------|-----|---------------------------------------------------------------------|-----|-----------|--------|-------|----------------------------------------------------------------------------------------------------------------------------------------------------------------------------------------------------------------------------------------------------------------------------------------------------------------------------------------------------------------------------------------------------------------------------------------------------------------------------------------------------------------------------------------------------|
| 2727 | c76348_g1_i1_len_721_path_1_0_720_3               | 18  | plexin- partial                                                     | 241 | 3.91E-118 | 83.80% | 0.103 | Coil (COILS); IPR013548 (PFAM); PTHR22625 (PANTHER); PTHR22625:SF16 (PANTHER); TRANSMEMBRANE (PHOBIUS); CYTOPLASMIC_DOMAIN (PHOBIUS); NON_CYTOPLASMIC_DOMAIN (PHOBIUS); TMhelix (TMHMM)                                                                                                                                                                                                                                                                                                                                                            |
| 2728 | c76440_g1_i1_len_249_path_17_0_248_0              | 4   | esterase fe4                                                        | 83  | 1.15E-25  | 73.40% | 0.126 | IPR029058 (G3DSA:3.40.50.GENE3D); IPR002018 (PFAM); PTHR11559 (PANTHER); IPR019826 (PROSITE_PATTERNS); IPR029058 (SUPERFAMILY)                                                                                                                                                                                                                                                                                                                                                                                                                     |
| 2729 | c7661_g1_i1_len_1019_path_997_0_982_13_983_1018_4 | 618 | 27 kda hemolymph                                                    | 340 | 1.34E-30  | 49.50% | 0.203 | IPR009832 (PFAM); PTHR20997 (PANTHER); TRANSMEMBRANE (PHOBIUS); NON_CYTOPLASMIC_DOMAIN (PHOBIUS); CYTOPLASMIC_DOMAIN (PHOBIUS)                                                                                                                                                                                                                                                                                                                                                                                                                     |
| 2730 | c76639_g1_i1_len_360_path_338_0_359_0             | 9   | adp-dependent glucokinase-like                                      | 120 | 1.63E-38  | 73.20% | 0.176 | IPR029056 (G3DSA:3.40.1190.GENE3D); IPR007666 (PFAM); PTHR21208:SF1 (PANTHER); IPR007666 (PANTHER); IPR007666 (PROSITE_PROFILES); IPR029056 (SUPERFAMILY)                                                                                                                                                                                                                                                                                                                                                                                          |
| 2731 | c76653_g1_i1_len_534_path_512_0_533_1             | 10  | low-density lipoprotein receptor-related protein partial            | 178 | 1.62E-29  | 57.50% | 0.11  | IPR000859 (SMART); IPR002172 (SMART); IPR002172 (G3DSA:4.10.400.GENE3D); IPR000859 (G3DSA:2.60.120.GENE3D); IPR002172 (PFAM); IPR000859 (PFAM); PTHR10529 (PANTHER); PTHR10529:SF216 (PANTHER); IPR023415 (PROSITE_PATTERNS); IPR000859 (PROSITE_PROFILES); IPR002172 (PROSITE_PROFILES); IPR000859 (SUPERFAMILY); IPR002172 (SUPERFAMILY)                                                                                                                                                                                                         |
| 2732 | c76734_g1_i1_len_830_path_1_0_829_2               | 13  | sodium channel protein para                                         | 276 | 1.44E-137 | 89.50% | 0.118 | IPR010526 (PFAM); IPR005821 (PFAM); IPR027359 (G3DSA:1.20.120.GENE3D); PTHR10037 (PANTHER); IPR028814 (PTHR10037:PANTHER); CYTOPLASMIC_DOMAIN (PHOBIUS); TRANSMEMBRANE (PHOBIUS); TRANSMEMBRANE (PHOBIUS); TRANSMEMBRANE (PHOBIUS); CYTOPLASMIC_DOMAIN (PHOBIUS); TRANSMEMBRANE (PHOBIUS); TRANSMEMBRANE (PHOBIUS); CYTOPLASMIC_DOMAIN (PHOBIUS); NON_CYTOPLASMIC_DOMAIN (PHOBIUS); NON_CYTOPLASMIC_DOMAIN (PHOBIUS); NON_CYTOPLASMIC_DOMAIN (PHOBIUS); SSF81324 (SUPERFAMILY); TMhelix (TMHMM); TMhelix (TMHMM); TMhelix (TMHMM); TMhelix (TMHMM) |
| 2733 | c76810_g1_i1_len_328_path_1_0_327_1               | 9   | glycoside hydrolase family 1                                        | 109 | 8.42E-33  | 80.70% | 0.109 | IPR013781 (G3DSA:3.20.20.GENE3D); IPR001360 (PFAM); IPR001360 (PANTHER); IPR018120 (PROSITE_PATTERNS); IPR017853 (SUPERFAMILY)                                                                                                                                                                                                                                                                                                                                                                                                                     |
| 2734 | c77155_g1_i1_len_488_path_1_0_487_4               | 8   | vascular endothelial growth factor receptor 1-like                  | 163 | 2.73E-18  | 57.40% | 0.104 | G3DSA:1.10.510.10 (GENE3D); IPR001956 (G3DSA:2.60.40.GENE3D); IPR001245 (PFAM); PTHR24416:SF298 (PANTHER); PTHR24416 (PANTHER); IPR011009 (SUPERFAMILY)                                                                                                                                                                                                                                                                                                                                                                                            |
| 2735 | c77273_g1_i1_len_412_path_1_0_411_1               | 103 | glycosyl-phosphatidylinositol-linked carbonic anhydrase             | 137 | 1.28E-11  | 54.70% | 0.32  | IPR001148 (PFAM); IPR001148 (G3DSA:3.10.200.GENE3D); IPR023561 (PANTHER); SIGNAL_PEPTIDE_N_REGION (PHOBIUS); NON_CYTOPLASMIC_DOMAIN (PHOBIUS); SIGNAL_PEPTIDE_H_REGION (PHOBIUS); SIGNAL_PEPTIDE (PHOBIUS); SIGNAL_PEPTIDE_C_REGION (PHOBIUS); IPR001148 (PROSITE_PROFILES); IPR001148 (SUPERFAMILY)                                                                                                                                                                                                                                               |
| 2736 | c77400_g1_i1_len_249_path_227_0_248_1             | 4   | microtubule-associated serine threonine-protein kinase 3 isoform x3 | 83  | 1.25E-47  | 98.00% | 0.121 | IPR000719 (PFAM); G3DSA:1.10.510.10 (GENE3D); PTHR24356 (PANTHER); PTHR24356:SF36 (PANTHER); IPR008271 (PROSITE_PATTERNS); IPR000719 (PROSITE_PROFILES); IPR011009 (SUPERFAMILY)                                                                                                                                                                                                                                                                                                                                                                   |
| 2737 | c77544_g1_i1_len_356_path_334_0_355_2             | 7   | gastrula zinc finger protein                                        | 118 | 9.73E-23  | 59.30% | 0.098 | IPR015880 (SMART); IPR007087 (PFAM); PF13465 (PFAM); IPR013087 (G3DSA:3.30.160.GENE3D); IPR013087 (G3DSA:3.30.160.GENE3D); IPR013087 (G3DSA:3.30.160.GENE3D); PTHR24409:SF14 (PANTHER); PTHR24409 (PANTHER); IPR007087 (PROSITE_PATTERNS); IPR007087 (PROSITE_PATTERNS); IPR007087 (PROSITE_PATTERNS); IPR007087 (PROSITE_PATTERNS); IPR007087 (PROSITE_PROFILES); IPR007087 (PROSITE_PROFILES); IPR007087 (PROSITE_PROFILES); IPR007087 (PROSITE_PROFILES); SSF57667 (SUPERFAMILY); SSF57667 (SUPERFAMILY)                                        |
| 2738 | c77569_g1_i1_len_673_path_651_0_672_4             | 18  | otopettrin-2 isoform x1                                             | 224 | 2.42E-61  | 58.60% | 0.201 | IPR004878 (PFAM); IPR004878 (PANTHER); PTHR21522:SF37 (PANTHER); NON_CYTOPLASMIC_DOMAIN (PHOBIUS); CYTOPLASMIC_DOMAIN (PHOBIUS); NON_CYTOPLASMIC_DOMAIN (PHOBIUS); NON_CYTOPLASMIC_DOMAIN (PHOBIUS); CYTOPLASMIC_DOMAIN (PHOBIUS); TRANSMEMBRANE (PHOBIUS); TRANSMEMBRANE (PHOBIUS); TRANSMEMBRANE (PHOBIUS); TRANSMEMBRANE (PHOBIUS); TMhelix (TMHMM); TMhelix (TMHMM); TMhelix (TMHMM); TMhelix (TMHMM)                                                                                                                                          |
| 2739 | c77687_g1_i1_len_375_path_353_0_374_0             | 8   | ankyrin repeat-containing protein                                   | 125 | 1.10E-10  | 55.50% | 0.121 | IPR002110 (SMART); IPR020683 (PFAM); IPR020683 (G3DSA:1.25.40.GENE3D); PTHR24182 (PANTHER); IPR020683 (PROSITE_PROFILES); IPR002110 (PROSITE_PROFILES); IPR020683 (SUPERFAMILY)                                                                                                                                                                                                                                                                                                                                                                    |
| 2740 | c77816_g1_i1_len_452_path_430_0_451_2             | 8   | transport and golgi organization protein 1                          | 150 | 3.45E-16  | 63.70% | 0.32  | IPR011511 (PFAM); G3DSA:2.30.30.40 (GENE3D); IPR001452 (SUPERFAMILY)                                                                                                                                                                                                                                                                                                                                                                                                                                                                               |

|      |                                        |     |                                                                   |     |          |        |       |                                                                                                                                                                                                                                                                                                                                                                                                                                                                                                                                                                             |
|------|----------------------------------------|-----|-------------------------------------------------------------------|-----|----------|--------|-------|-----------------------------------------------------------------------------------------------------------------------------------------------------------------------------------------------------------------------------------------------------------------------------------------------------------------------------------------------------------------------------------------------------------------------------------------------------------------------------------------------------------------------------------------------------------------------------|
| 2741 | c77822_g1_i1_len_585_path_1_0_584_5    | 12  | zinc finger and btb domain-containing protein partial             | 195 | 1.04E-22 | 59.60% | 0.099 | IPR015880 (SMART); IPR013087 (G3DSA:3.30.160.GENE3D); PF13465 (PFAM); IPR007087 (PFAM); PF13894 (PFAM); IPR013087 (G3DSA:3.30.160.GENE3D); PTHR24409:SF14 (PANTHER); PTHR24409 (PANTHER); IPR007087 (PROSITE_PATTERNS); IPR007087 (PROSITE_PATTERNS); IPR007087 (PROSITE_PATTERNS); IPR007087 (PROSITE_PATTERNS); IPR007087 (PROSITE_PROFILES); IPR007087 (PROSITE_PROFILES); IPR007087 (PROSITE_PROFILES); IPR007087 (PROSITE_PROFILES); SSF57667 (SUPERFAMILY); SSF57667 (SUPERFAMILY);                                                                                   |
| 2742 | c77895_g1_i1_len_441_path_419_0_440_4  | 10  | zinc finger protein 235-like                                      | 147 | 2.54E-32 | 61.40% | 0.11  | IPR015880 (SMART); IPR007087 (PFAM); IPR013087 (G3DSA:3.30.160.GENE3D); IPR013087 (G3DSA:3.30.160.GENE3D); PF13465 (PFAM); IPR013087 (G3DSA:3.30.160.GENE3D); PTHR24409 (PANTHER); IPR007087 (PROSITE_PATTERNS); IPR007087 (PROSITE_PATTERNS); IPR007087 (PROSITE_PATTERNS); IPR007087 (PROSITE_PATTERNS); IPR007087 (PROSITE_PROFILES); IPR007087 (PROSITE_PROFILES); IPR007087 (PROSITE_PROFILES); IPR007087 (PROSITE_PROFILES); SSF57667 (SUPERFAMILY); SSF57667 (SUPERFAMILY);                                                                                          |
| 2743 | c77920_g1_i1_len_429_path_407_0_428_0  | 6   | maltase- intestinal isoform x2                                    | 143 | 5.02E-33 | 61.20% | 0.099 | PTHR22762 (PANTHER); PTHR22762:SF7 (PANTHER); IPR011013 (SUPERFAMILY)                                                                                                                                                                                                                                                                                                                                                                                                                                                                                                       |
| 2744 | c77989_g1_i1_len_500_path_1_0_499_4    | 14  | plexin-a4                                                         | 167 | 3.77E-66 | 77.40% | 0.101 | IPR002909 (SMART); IPR013783 (G3DSA:2.60.40.GENE3D); IPR013783 (G3DSA:2.60.40.GENE3D); IPR002909 (PFAM); PTHR22625 (PANTHER); PTHR22625:SF16 (PANTHER); IPR014756 (SUPERFAMILY); IPR014756 (SUPERFAMILY)                                                                                                                                                                                                                                                                                                                                                                    |
| 2745 | c7852_g1_i1_len_1593_path_131_0_1592_4 | 61  | zinc c2h2                                                         | 531 | 8.38E-55 | 76.90% | 0.153 | IPR015880 (SMART); PF13465 (PFAM); IPR013087 (G3DSA:3.30.160.GENE3D); IPR013087 (G3DSA:3.30.160.GENE3D); IPR013087 (G3DSA:3.30.160.GENE3D); PF13894 (PFAM); PTHR23223 (PANTHER); PTHR23223:SF130 (PANTHER); IPR007087 (PROSITE_PATTERNS); IPR007087 (PROSITE_PATTERNS); IPR007087 (PROSITE_PATTERNS); IPR007087 (PROSITE_PATTERNS); TRANSMEMBRANE (PHOBIUS); CYTOPLASMIC_DOMAIN (PHOBIUS); NON_CYTOPLASMIC_DOMAIN (PHOBIUS); IPR007087 (PROSITE_PROFILES); IPR007087 (PROSITE_PROFILES); IPR007087 (PROSITE_PROFILES); IPR007087 (PROSITE_PROFILES); SSF57667 (SUPERFAMILY) |
| 2746 | c78590_g1_i1_len_304_path_282_0_303_2  | 6   | zinc finger and btb domain-containing protein 49                  | 101 | 4.72E-13 | 62.20% | 0.099 | IPR015880 (SMART); PF13465 (PFAM); IPR013087 (G3DSA:3.30.160.GENE3D); IPR013087 (G3DSA:3.30.160.GENE3D); PTHR24409 (PANTHER); IPR007087 (PROSITE_PATTERNS); IPR007087 (PROSITE_PROFILES); IPR007087 (PROSITE_PROFILES); SSF57667 (SUPERFAMILY)                                                                                                                                                                                                                                                                                                                              |
| 2747 | c78598_g1_i1_len_496_path_1_0_495_5    | 8   | zinc finger                                                       | 165 | 1.52E-74 | 84.20% | 0.11  | IPR015880 (SMART); IPR013087 (G3DSA:3.30.160.GENE3D); IPR013087 (G3DSA:3.30.160.GENE3D); PF13894 (PFAM); IPR007087 (PFAM); PTHR23228 (PANTHER); PTHR23228:SF78 (PANTHER); IPR007087 (PROSITE_PATTERNS); IPR007087 (PROSITE_PATTERNS); IPR007087 (PROSITE_PROFILES); IPR007087 (PROSITE_PROFILES); IPR007087 (PROSITE_PROFILES); SSF57667 (SUPERFAMILY); SSF57667 (SUPERFAMILY)                                                                                                                                                                                              |
| 2748 | c78628_g1_i1_len_402_path_1_0_401_5    | 11  | bone morphogenetic protein receptor type-2                        | 134 | 3.31E-57 | 80.20% | 0.135 | G3DSA:1.10.510.10 (GENE3D); IPR000719 (PFAM); PTHR23255:SF52 (PANTHER); IPR000333 (PANTHER); IPR000719 (PROSITE_PROFILES); IPR011009 (SUPERFAMILY)                                                                                                                                                                                                                                                                                                                                                                                                                          |
| 2749 | c7879_g1_i1_len_1098_path_1_0_1097_2   | 184 | superoxide dismutase                                              | 366 | 5.85E-59 | 66.10% | 0.158 | IPR001424 (PRINTS); IPR001424 (G3DSA:2.60.40.GENE3D); IPR001424 (PFAM); PTHR10003 (PANTHER); IPR018152 (PROSITE_PATTERNS); IPR018152 (PROSITE_PATTERNS); IPR001424 (SUPERFAMILY)                                                                                                                                                                                                                                                                                                                                                                                            |
| 2750 | c78826_g1_i1_len_412_path_390_0_411_3  | 10  | zinc finger protein                                               | 138 | 1.20E-25 | 60.50% | 0.098 | IPR015880 (SMART); IPR013087 (G3DSA:3.30.160.GENE3D); IPR013087 (G3DSA:3.30.160.GENE3D); IPR007087 (PFAM); PF13894 (PFAM); PTHR24409 (PANTHER); PTHR24409:SF14 (PANTHER); IPR007087 (PROSITE_PATTERNS); IPR007087 (PROSITE_PATTERNS); IPR007087 (PROSITE_PATTERNS); IPR007087 (PROSITE_PROFILES); IPR007087 (PROSITE_PROFILES); IPR007087 (PROSITE_PROFILES); IPR007087 (PROSITE_PROFILES); SSF57667 (SUPERFAMILY); SSF57667 (SUPERFAMILY)                                                                                                                                  |
| 2751 | c78885_g1_i1_len_170_path_1_0_169_5    | 1   | ectonucleotide pyrophosphatase phosphodiesterase family member 3  | 56  | 5.74E-11 | 71.40% | 0.147 | IPR002591 (PFAM); IPR017849 (G3DSA:3.40.720.GENE3D); IPR024873 (PANTHER); IPR017850 (SUPERFAMILY)                                                                                                                                                                                                                                                                                                                                                                                                                                                                           |
| 2752 | c78996_g1_i1_len_412_path_1_0_411_5    | 8   | leucine-rich repeat and transmembrane domain-containing protein 1 | 137 | 9.02E-11 | 58.30% | 0.103 | PR00019 (PRINTS); IPR003591 (SMART); G3DSA:3.80.10.10 (GENE3D); IPR001611 (PFAM); IPR001611 (PFAM); PTHR24365 (PANTHER); IPR001611 (PROSITE_PROFILES); IPR001611 (PROSITE_PROFILES); IPR001611 (PROSITE_PROFILES); SSF52058 (SUPERFAMILY)                                                                                                                                                                                                                                                                                                                                   |

|      |                                                                        |     |                                                      |      |          |        |       |                                                                                                                                                                                                                                                                                                                                                                                                                                                                                                                                                                                                                                                           |
|------|------------------------------------------------------------------------|-----|------------------------------------------------------|------|----------|--------|-------|-----------------------------------------------------------------------------------------------------------------------------------------------------------------------------------------------------------------------------------------------------------------------------------------------------------------------------------------------------------------------------------------------------------------------------------------------------------------------------------------------------------------------------------------------------------------------------------------------------------------------------------------------------------|
| 2753 | c79020_g1_i1_len_484_path_1_0_483_4                                    | 16  | carbohydrate sulfotransferase 11 isoform x1          | 161  | 1.56E-28 | 57.30% | 0.123 | IPR005331 (PFAM); PTHR12137:SF29 (PANTHER); IPR018011 (PANTHER)                                                                                                                                                                                                                                                                                                                                                                                                                                                                                                                                                                                           |
| 2754 | c79204_g1_i1_len_324_path_1_0_323_1                                    | 6   | low quality protein: glypican-1                      | 108  | 6.30E-16 | 77.60% | 0.103 | IPR001863 (PFAM); PTHR10822:SF25 (PANTHER); IPR001863 (PANTHER)                                                                                                                                                                                                                                                                                                                                                                                                                                                                                                                                                                                           |
| 2755 | c79268_g1_i1_len_1274_path_1252_0_1273_4                               | 27  | lethal isoform a                                     | 425  | 5.56E-54 | 91.30% | 0.235 | IPR024084 (G3DSA:3.40.718.GENE3D); IPR024084 (PFAM); IPR001804 (PANTHER); PTHR11835:SF34 (PANTHER); IPR019818 (PROSITE_PATTERNS); TRANSMEMBRANE (PHOBIUS); NON_CYTOPLASMIC_DOMAIN (PHOBIUS); CYTOPLASMIC_DOMAIN (PHOBIUS); SSF53659 (SUPERFAMILY); TMhelix (TMHMM)                                                                                                                                                                                                                                                                                                                                                                                        |
| 2756 | c79392_g1_i1_len_256_path_1_0_255_4                                    | 2   | cre-lrp-1 protein                                    | 85   | 3.86E-13 | 76.10% | 0.12  | IPR000033 (PFAM); IPR011042 (G3DSA:2.120.10.GENE3D); IPR000033 (PROSITE_PROFILES)                                                                                                                                                                                                                                                                                                                                                                                                                                                                                                                                                                         |
| 2757 | c7943_g1_i1_len_3519_path_3497_0_1658_5_156_1659_1661_5159_1662_3518_5 | 218 | low-density lipoprotein receptor-related protein 2   | 1173 | 3.20E-13 | 53.00% | 0.101 | IPR002172 (PRINTS); IPR002172 (SMART); IPR000998 (SMART); IPR002172 (G3DSA:4.10.400.GENE3D); IPR002172 (G3DSA:4.10.400.GENE3D); IPR000998 (PFAM); IPR000859 (G3DSA:2.60.120.GENE3D); IPR002172 (PFAM); PTHR10529 (PANTHER); TRANSMEMBRANE (PHOBIUS); NON_CYTOPLASMIC_DOMAIN (PHOBIUS); CYTOPLASMIC_DOMAIN (PHOBIUS); TRANSMEMBRANE (PHOBIUS); NON_CYTOPLASMIC_DOMAIN (PHOBIUS); IPR000998 (PROSITE_PROFILES); IPR002172 (PROSITE_PROFILES); IPR000998 (PROSITE_PROFILES); IPR000998 (PROSITE_PROFILES); IPR000998 (PROSITE_PROFILES); IPR013320 (SUPERFAMILY); IPR013320 (SUPERFAMILY); IPR002172 (SUPERFAMILY); IPR013320 (SUPERFAMILY); TMhelix (TMHMM) |
| 2758 | c79458_g1_i1_len_310_path_1_0_309_0                                    | 5   | tyrosine-protein kinase dnt                          | 104  | 2.85E-41 | 78.70% | 0.1   | G3DSA:3.30.200.20 (GENE3D); IPR001245 (PFAM); PTHR24416 (PANTHER); PTHR24416:SF302 (PANTHER); IPR011009 (SUPERFAMILY)                                                                                                                                                                                                                                                                                                                                                                                                                                                                                                                                     |
| 2759 | c79460_g1_i1_len_362_path_360_0_361_0                                  | 2   | repetin                                              | 121  | 1.33E-08 | 47.78% | 0.101 | no IPS match                                                                                                                                                                                                                                                                                                                                                                                                                                                                                                                                                                                                                                              |
| 2760 | c79461_g1_i1_len_159_path_1_0_158_2                                    | 1   | xanthine dehydrogenase oxidase-like                  | 53   | 1.09E-18 | 85.00% | 0.127 | IPR008274 (PFAM); IPR008274 (G3DSA:3.30.365.GENE3D); PTHR11908 (PANTHER); PTHR11908:SF32 (PANTHER); IPR008274 (SUPERFAMILY)                                                                                                                                                                                                                                                                                                                                                                                                                                                                                                                               |
| 2761 | c79571_g1_i1_len_537_path_515_0_536_2                                  | 9   | zinc finger protein 239- partial                     | 179  | 4.44E-45 | 71.60% | 0.151 | IPR015880 (SMART); IPR013087 (G3DSA:3.30.160.GENE3D); PF13465 (PFAM); IPR013087 (G3DSA:3.30.160.GENE3D); IPR013087 (G3DSA:3.30.160.GENE3D); PTHR24409 (PANTHER); IPR007087 (PROSITE_PATTERNS); IPR007087 (PROSITE_PATTERNS); IPR007087 (PROSITE_PATTERNS); IPR007087 (PROSITE_PROFILES); IPR007087 (PROSITE_PROFILES); IPR007087 (PROSITE_PROFILES); IPR007087 (PROSITE_PROFILES); SSF57667 (SUPERFAMILY); SSF57667 (SUPERFAMILY)                                                                                                                                                                                                                         |
| 2763 | c7961_g1_i1_len_1506_path_1484_0_1505_0                                | 68  | endoplasmic reticulum resident protein 44 isoform x2 | 502  | 0        | 79.10% | 0.178 | IPR012336 (G3DSA:3.40.30.GENE3D); IPR013766 (PFAM); PF13848 (PFAM); IPR012336 (G3DSA:3.40.30.GENE3D); PTHR18929:SF49 (PANTHER); PTHR18929 (PANTHER); IPR012336 (PROSITE_PROFILES); IPR012336 (SUPERFAMILY); IPR012336 (SUPERFAMILY); IPR012336 (SUPERFAMILY)                                                                                                                                                                                                                                                                                                                                                                                              |
| 2762 | c79617_g1_i1_len_141_path_1_0_140_1                                    | 0   | 5 -nucleotidase-like                                 | 47   | 5.73E-12 | 82.70% | 0.142 | IPR029052 (G3DSA:3.60.21.GENE3D); PTHR11575:SF20 (PANTHER); IPR006179 (PANTHER); IPR029052 (SUPERFAMILY)                                                                                                                                                                                                                                                                                                                                                                                                                                                                                                                                                  |
| 2764 | c79739_g1_i1_len_684_path_662_0_683_1                                  | 25  | zinc finger protein 235                              | 228  | 2.80E-12 | 48.70% | 0.1   | IPR015880 (SMART); PF13894 (PFAM); IPR007087 (PFAM); IPR013087 (G3DSA:3.30.160.GENE3D); PTHR24409:SF14 (PANTHER); PTHR24409 (PANTHER); IPR007087 (PROSITE_PATTERNS); IPR007087 (PROSITE_PATTERNS); IPR007087 (PROSITE_PROFILES); IPR007087 (PROSITE_PROFILES); SSF57667 (SUPERFAMILY)                                                                                                                                                                                                                                                                                                                                                                     |
| 2765 | c7979_g1_i1_len_949_path_927_0_948_5                                   | 388 | poly -specific endoribonuclease homolog              | 316  | 4.92E-79 | 63.40% | 0.306 | IPR018998 (PFAM); PTHR12439 (PANTHER); SIGNAL_PEPTIDE (PHOBIUS); NON_CYTOPLASMIC_DOMAIN (PHOBIUS); SIGNAL_PEPTIDE_H_REGION (PHOBIUS); SIGNAL_PEPTIDE_C_REGION (PHOBIUS); SIGNAL_PEPTIDE_N_REGION (PHOBIUS); SSF142877 (SUPERFAMILY)                                                                                                                                                                                                                                                                                                                                                                                                                       |
| 2766 | c79826_g1_i1_len_752_path_730_0_751_5                                  | 16  | g-protein coupled receptor mth2                      | 250  | 2.17E-50 | 62.20% | 0.249 | IPR000832 (PFAM); PTHR12011:SF244 (PANTHER); PTHR12011 (PANTHER); TRANSMEMBRANE (PHOBIUS); NON_CYTOPLASMIC_DOMAIN (PHOBIUS); NON_CYTOPLASMIC_DOMAIN (PHOBIUS); NON_CYTOPLASMIC_DOMAIN (PHOBIUS); TRANSMEMBRANE (PHOBIUS); CYTOPLASMIC_DOMAIN (PHOBIUS); TRANSMEMBRANE (PHOBIUS); CYTOPLASMIC_DOMAIN (PHOBIUS); TRANSMEMBRANE (PHOBIUS); IPR017981 (PROSITE_PROFILES); SSF81321 (SUPERFAMILY); TMhelix (TMHMM); TMhelix (TMHMM); TMhelix (TMHMM); TMhelix (TMHMM)                                                                                                                                                                                          |





|      |                                                             |     |                                                                       |     |          |        |        |                                                                                                                                                                                                                                                                                                                                                                                                                                                      |
|------|-------------------------------------------------------------|-----|-----------------------------------------------------------------------|-----|----------|--------|--------|------------------------------------------------------------------------------------------------------------------------------------------------------------------------------------------------------------------------------------------------------------------------------------------------------------------------------------------------------------------------------------------------------------------------------------------------------|
| 2780 | c80978_g1_i1_len_268_path_1_0_6_8_7_93_8_94_180_8_181_267_4 | 1   | zinc c2h2 type                                                        | 89  | 8.70E-15 | 56.70% | 0.101  | IPR015880 (SMART); IPR013087 (G3DSA:3.30.160.GENE3D); PF13465 (PFAM); PTHR24409:SF13 (PANTHER); PTHR24409 (PANTHER); IPR007087 (PROSITE_PATTERNS); IPR007087 (PROSITE_PATTERNS); IPR007087 (PROSITE_PROFILES); IPR007087 (PROSITE_PROFILES); SSF57667 (SUPERFAMILY); SSF57667 (SUPERFAMILY)                                                                                                                                                          |
| 2781 | c81076_g1_i1_len_454_path_432_0_453_4                       | 13  | transcriptional repressor ctcf-like isoform x1                        | 151 | 1.02E-88 | 91.90% | 0.103  | IPR015880 (SMART); IPR013087 (G3DSA:3.30.160.GENE3D); IPR013087 (G3DSA:3.30.160.GENE3D); IPR013087 (G3DSA:3.30.160.GENE3D); PF13465 (PFAM); PTHR24375:SF1 (PANTHER); PTHR24375 (PANTHER); IPR007087 (PROSITE_PATTERNS); IPR007087 (PROSITE_PATTERNS); IPR007087 (PROSITE_PROFILES); IPR007087 (PROSITE_PROFILES); IPR007087 (PROSITE_PROFILES); IPR007087 (PROSITE_PROFILES); SSF57667 (SUPERFAMILY); SSF57667 (SUPERFAMILY); SSF57667 (SUPERFAMILY) |
| 2782 | c81114_g1_i1_len_293_path_271_0_292_1                       | 8   | de-cadherin isoform x1                                                | 98  | 8.96E-25 | 67.60% | 0.098  | IPR002126 (PRINTS); IPR002126 (G3DSA:2.60.40.GENE3D); PTHR24027 (PANTHER); PTHR24027:SF276 (PANTHER); IPR020894 (PROSITE_PATTERNS); IPR002126 (PROSITE_PROFILES); IPR015919 (SUPERFAMILY)                                                                                                                                                                                                                                                            |
| 2783 | c8117_g1_i1_len_748_path_39_0_31_70_32_32_19_33_747_2       | 24  | ---NA---                                                              | 249 |          |        | 0.344Y | no IPS match                                                                                                                                                                                                                                                                                                                                                                                                                                         |
| 2784 | c8135_g1_i1_len_312_path_479_0_18_481_1_9_311_2             | 7   | tyrosine-protein phosphatase partial                                  | 104 | 1.08E-48 | 91.30% | 0.144  | PR00014 (PRINTS); IPR003961 (SMART); IPR003961 (PFAM); IPR013783 (G3DSA:2.60.40.GENE3D); PTHR19134 (PANTHER); PTHR19134:SF204 (PANTHER); IPR003961 (PROSITE_PROFILES); IPR003961 (SUPERFAMILY)                                                                                                                                                                                                                                                       |
| 2785 | c8135_g1_i2_len_443_path_41_0_149_481_1_50_442_1            | 21  | tyrosine-protein phosphatase lar isoform x4                           | 148 | 2.05E-74 | 87.40% | 0.118  | PR00014 (PRINTS); IPR003961 (SMART); IPR003961 (PFAM); IPR013783 (G3DSA:2.60.40.GENE3D); IPR013783 (G3DSA:2.60.40.GENE3D); PTHR19134 (PANTHER); PTHR19134:SF204 (PANTHER); IPR003961 (PROSITE_PROFILES); IPR003961 (PROSITE_PROFILES); IPR003961 (SUPERFAMILY)                                                                                                                                                                                       |
| 2786 | c81464_g1_i1_len_441_path_419_0_440_1                       | 9   | transforming growth factor-beta-induced protein ig-h3-like isoform x6 | 147 | 8.63E-49 | 67.00% | 0.174  | IPR000782 (SMART); IPR000782 (PFAM); IPR000782 (G3DSA:2.30.180.GENE3D); PTHR10900 (PANTHER); IPR000782 (PROSITE_PROFILES); IPR000782 (SUPERFAMILY)                                                                                                                                                                                                                                                                                                   |
| 2787 | c81560_g1_i1_len_216_path_1_0_215_1                         | 2   | er degradation-enhancing alpha-mannosidase-like 3                     | 72  | 2.80E-39 | 92.20% | 0.111  | IPR001382 (G3DSA:1.50.10.GENE3D); IPR001382 (PFAM); PTHR11742:SF38 (PANTHER); IPR001382 (PANTHER); IPR001382 (SUPERFAMILY)                                                                                                                                                                                                                                                                                                                           |
| 2788 | c8169_g1_i1_len_1150_path_1178_0_827_52_828_1149_0          | 402 | otogelin- partial                                                     | 384 | 7.96E-17 | 38.60% | 0.202  | no IPS match                                                                                                                                                                                                                                                                                                                                                                                                                                         |
| 2789 | c81816_g1_i1_len_473_path_1_0_472_2                         | 18  | insulin degrading                                                     | 157 | 5.58E-48 | 72.90% | 0.139  | IPR007863 (PFAM); IPR011237 (G3DSA:3.30.830.GENE3D); PTHR11851:SF108 (PANTHER); PTHR11851 (PANTHER); IPR011249 (SUPERFAMILY)                                                                                                                                                                                                                                                                                                                         |
| 2790 | c81885_g1_i1_len_559_path_537_0_558_4                       | 8   | neurexin-4 isoform x2                                                 | 186 | 2.70E-81 | 78.20% | 0.185  | IPR000742 (PFAM); G3DSA:2.10.25.10 (GENE3D); IPR013320 (G3DSA:2.60.120.GENE3D); PTHR10127 (PANTHER); PTHR10127:SF556 (PANTHER); IPR001791 (PROSITE_PROFILES); IPR000742 (PROSITE_PROFILES); SSF57196 (SUPERFAMILY); IPR013320 (SUPERFAMILY)                                                                                                                                                                                                          |
| 2791 | c8224_g1_i1_len_1142_path_1120_0_1141_2                     | 85  | balbiani ring protein 3                                               | 380 | 6.84E-18 | 49.80% | 0.104  | IPR000072 (SMART); IPR000072 (PFAM); IPR004153 (PFAM); IPR029034 (G3DSA:2.10.90.GENE3D); PTHR11633:SF1 (PANTHER); PTHR11633 (PANTHER); TRANSMEMBRANE (PHOBIUS); CYTOPLASMIC_DOMAIN (PHOBIUS); NON_CYTOPLASMIC_DOMAIN (PHOBIUS); CYTOPLASMIC_DOMAIN (PHOBIUS); TRANSMEMBRANE (PHOBIUS); IPR000072 (PROSITE_PROFILES); IPR029034 (SUPERFAMILY); TMhelix (TMHMM)                                                                                        |

|      |                                                                      |    |                                                                                                                                                                            |     |           |        |       |                                                                                                                                                                                                                                                                                                                                                                                                                                                                                                                                                                                                                                                                                                                                                                                                                                                                                                                                                                                                    |
|------|----------------------------------------------------------------------|----|----------------------------------------------------------------------------------------------------------------------------------------------------------------------------|-----|-----------|--------|-------|----------------------------------------------------------------------------------------------------------------------------------------------------------------------------------------------------------------------------------------------------------------------------------------------------------------------------------------------------------------------------------------------------------------------------------------------------------------------------------------------------------------------------------------------------------------------------------------------------------------------------------------------------------------------------------------------------------------------------------------------------------------------------------------------------------------------------------------------------------------------------------------------------------------------------------------------------------------------------------------------------|
| 2792 | c82332_g1_i1_len_866_path_844_0_865_0                                | 19 | neurogenic locus protein partial                                                                                                                                           | 289 | 3.67E-125 | 74.80% | 0.102 | PR00010 (PRINTS); IPR001881 (SMART); IPR000742 (SMART); G3DSA:2.10.25.10 (GENE3D); G3DSA:2.10.25.10 (GENE3D); IPR000742 (PFAM); PTHR24044:SF216 (PANTHER); PTHR24044 (PANTHER); IPR013032 (PROSITE_PATTERNS); IPR013032 (PROSITE_PATTERNS); IPR013032 (PROSITE_PATTERNS); IPR013032 (PROSITE_PATTERNS); IPR018097 (PROSITE_PATTERNS); IPR013032 (PROSITE_PATTERNS); IPR000152 (PROSITE_PATTERNS); IPR013032 (PROSITE_PATTERNS); IPR013032 (PROSITE_PATTERNS); IPR013032 (PROSITE_PATTERNS); IPR018097 (PROSITE_PATTERNS); IPR013032 (PROSITE_PATTERNS); IPR000152 (PROSITE_PATTERNS); IPR013032 (PROSITE_PATTERNS); IPR000152 (PROSITE_PATTERNS); IPR000742 (PROSITE_PROFILES); SSF57196 (SUPERFAMILY); IPR009030 (SUPERFAMILY); SSF57196 (SUPERFAMILY); SSF57196 (SUPERFAMILY); |
| 2793 | c82333_g1_i1_len_437_path_1_0_436_4                                  | 6  | zinc finger protein 271 (zinc finger protein 7) (zinc finger protein znfphe133) (epstein-barr virus-induced zinc finger protein) (znf-eb) (ct-zfp48) (zinc finger protein) | 146 | 5.70E-26  | 53.20% | 0.103 | IPR015880 (SMART); IPR013087 (G3DSA:3.30.160.GENE3D); PF13465 (PFAM); PF13912 (PFAM); IPR013087 (G3DSA:3.30.160.GENE3D); IPR007087 (PFAM); PTHR24409 (PANTHER); IPR007087 (PROSITE_PATTERNS); IPR007087 (PROSITE_PATTERNS); IPR007087 (PROSITE_PATTERNS); IPR007087 (PROSITE_PATTERNS); IPR007087 (PROSITE_PROFILES); IPR007087 (PROSITE_PROFILES); IPR007087 (PROSITE_PROFILES); IPR007087 (PROSITE_PROFILES); SSF57667 (SUPERFAMILY); SSF57667 (SUPERFAMILY); SSF57667 (SUPERFAMILY);                                                                                                                                                                                                                                                                                                                                                                                                                                                                                                            |
| 2794 | c8251_g1_i1_len_1609_path_1639_0_1227_2_866_1228_1229_54_1230_1608_2 | 71 | probable g-protein coupled receptor 133 isoform x2                                                                                                                         | 536 | 1.79E-54  | 53.00% | 0.202 | IPR000832 (PFAM); PTHR12011:SF222 (PANTHER); PTHR12011 (PANTHER); TRANSMEMBRANE (PHOBIUS); TRANSMEMBRANE (PHOBIUS); NON_CYTOPLASMIC_DOMAIN (PHOBIUS); TRANSMEMBRANE (PHOBIUS); TRANSMEMBRANE (PHOBIUS); TRANSMEMBRANE (PHOBIUS); CYTOPLASMIC_DOMAIN (PHOBIUS); TRANSMEMBRANE (PHOBIUS); TRANSMEMBRANE (PHOBIUS); CYTOPLASMIC_DOMAIN (PHOBIUS); NON_CYTOPLASMIC_DOMAIN (PHOBIUS); CYTOPLASMIC_DOMAIN (PHOBIUS); TRANSMEMBRANE (PHOBIUS); NON_CYTOPLASMIC_DOMAIN (PHOBIUS); CYTOPLASMIC_DOMAIN (PHOBIUS); TRANSMEMBRANE (PHOBIUS); CYTOPLASMIC_DOMAIN (PHOBIUS); NON_CYTOPLASMIC_DOMAIN (PHOBIUS); IPR017981 (PROSITE_PROFILES); TMhelix (TMHMM); TMhelix (TMHMM); TMhelix (TMHMM); TMhelix (TMHMM); TMhelix (TMHMM); TMhelix (TMHMM);                                                                                                                                                                                                                                                               |
| 2795 | c82584_g1_i1_len_374_path_1_0_373_1                                  | 6  | ectonucleotide pyrophosphatase phosphodiesterase family member 5                                                                                                           | 125 | 4.64E-22  | 60.20% | 0.102 | IPR002591 (PFAM); IPR017849 (G3DSA:3.40.720.GENE3D); IPR024873 (PANTHER); PTHR10151:SF70 (PANTHER); IPR017850 (SUPERFAMILY)                                                                                                                                                                                                                                                                                                                                                                                                                                                                                                                                                                                                                                                                                                                                                                                                                                                                        |
| 2796 | c82758_g1_i1_len_517_path_1_0_516_4                                  | 6  | fras1-related extracellular matrix protein 1-like                                                                                                                          | 172 | 6.52E-19  | 50.30% | 0.115 | PTHR15036 (PANTHER)                                                                                                                                                                                                                                                                                                                                                                                                                                                                                                                                                                                                                                                                                                                                                                                                                                                                                                                                                                                |
| 2797 | c8297_g1_i1_len_336_path_1_0_335_4                                   | 9  | achain crystal structure of engineered northeast structural genomics consortium target                                                                                     | 112 | 1.13E-19  | 55.50% | 0.13  | IPR002110 (SMART); IPR020683 (G3DSA:1.25.40.GENE3D); IPR020683 (PFAM); PTHR24193 (PANTHER); IPR002110 (PROSITE_PROFILES); IPR020683 (PROSITE_PROFILES); IPR002110 (PROSITE_PROFILES); IPR020683 (SUPERFAMILY)                                                                                                                                                                                                                                                                                                                                                                                                                                                                                                                                                                                                                                                                                                                                                                                      |
| 2798 | c8308_g1_i1_len_378_path_356_0_377_4                                 | 8  | ring finger and spry domain-containing protein 1-like                                                                                                                      | 126 | 2.24E-15  | 82.00% | 0.108 | IPR001841 (SMART); IPR013083 (G3DSA:3.30.40.GENE3D); PF13920 (PFAM); IPR001841 (PROSITE_PROFILES); SSF57850 (SUPERFAMILY)                                                                                                                                                                                                                                                                                                                                                                                                                                                                                                                                                                                                                                                                                                                                                                                                                                                                          |
| 2799 | c8308_g2_i1_len_320_path_1008_0_319_5                                | 6  | ring finger and spry domain-containing protein 1-like                                                                                                                      | 106 | 2.71E-40  | 75.20% | 0.202 | IPR003877 (PFAM); PTHR13363 (PANTHER); IPR001870 (PROSITE_PROFILES); IPR013320 (SUPERFAMILY)                                                                                                                                                                                                                                                                                                                                                                                                                                                                                                                                                                                                                                                                                                                                                                                                                                                                                                       |
| 2800 | c8310_g1_i1_len_279_path_1_0_278_3                                   | 4  | zinc finger protein 195- partial                                                                                                                                           | 93  | 3.81E-24  | 66.10% | 0.112 | IPR015880 (SMART); IPR013087 (G3DSA:3.30.160.GENE3D); IPR013087 (G3DSA:3.30.160.GENE3D); PF13465 (PFAM); PTHR24409 (PANTHER); IPR007087 (PROSITE_PATTERNS); IPR007087 (PROSITE_PATTERNS); IPR007087 (PROSITE_PROFILES); IPR007087 (PROSITE_PROFILES); IPR007087 (PROSITE_PROFILES); SSF57667 (SUPERFAMILY); SSF57667 (SUPERFAMILY)                                                                                                                                                                                                                                                                                                                                                                                                                                                                                                                                                                                                                                                                 |
| 2801 | c832_g1_i1_len_485_path_61_0_91_60_92_4_84_1                         | 16 | glutamyl aminopeptidase-like                                                                                                                                               | 162 | 1.70E-19  | 53.20% | 0.263 | G3DSA:1.10.390.10 (GENE3D); IPR001930 (PANTHER); PTHR11533:SF165 (PANTHER); SSF55486 (SUPERFAMILY)                                                                                                                                                                                                                                                                                                                                                                                                                                                                                                                                                                                                                                                                                                                                                                                                                                                                                                 |

|      |                                                             |      |                                                                                                                                                                            |     |          |        |        |                                                                                                                                                                                                                                                                                                                                                                                                                                                                                         |
|------|-------------------------------------------------------------|------|----------------------------------------------------------------------------------------------------------------------------------------------------------------------------|-----|----------|--------|--------|-----------------------------------------------------------------------------------------------------------------------------------------------------------------------------------------------------------------------------------------------------------------------------------------------------------------------------------------------------------------------------------------------------------------------------------------------------------------------------------------|
| 2802 | c8331_g2_i1_len_673_path_217_0_672_1                        | 17   | fibronectin type-iii domain-containing protein 3a-like isoform x5                                                                                                          | 224 | 1.80E-78 | 74.10% | 0.111  | IPR00014 (PRINTS); IPR003961 (SMART); IPR013783 (G3DSA:2.60.40.GENE3D); IPR013783 (G3DSA:2.60.40.GENE3D); IPR003961 (PFAM); IPR013783 (G3DSA:2.60.40.GENE3D); PTHR19900 (PANTHER); PTHR19900:SF50 (PANTHER); IPR003961 (PROSITE_PROFILES); IPR003961 (PROSITE_PROFILES); IPR003961 (PROSITE_PROFILES); IPR003961 (PROSITE_PROFILES); IPR003961 (SUPERFAMILY); IPR003961 (SUPERFAMILY)                                                                                                   |
| 2803 | c83334_g1_i1_len_369_path_1_0_368_3                         | 10   | chemosensory protein                                                                                                                                                       | 123 | 2.24E-52 | 85.50% | 0.352Y | IPR005055 (G3DSA:1.10.2080.GENE3D); IPR005055 (PFAM); PTHR11257:SF4 (PANTHER); IPR005055 (PANTHER); SIGNAL_PEPTIDE (PHOBIUS); SIGNAL_PEPTIDE_C_REGION (PHOBIUS); NON_CYTOPLASMIC_DOMAIN (PHOBIUS); SIGNAL_PEPTIDE_H_REGION (PHOBIUS); SIGNAL_PEPTIDE_N_REGION (PHOBIUS); IPR005055 (SUPERFAMILY); TMhelix (TMHMM)                                                                                                                                                                       |
| 2804 | c83348_g1_i1_len_349_path_1_0_348_1                         | 4    | protein kinase domain-containing cytoplasmic isoform x2                                                                                                                    | 116 | 2.04E-21 | 54.00% | 0.099  | no IPS match                                                                                                                                                                                                                                                                                                                                                                                                                                                                            |
| 2805 | c83371_g1_i1_len_397_path_375_0_396_0                       | 14   | PREDICTED: uncharacterized protein LOC103569758                                                                                                                            | 133 | 2.06E-15 | 63.60% | 0.106  | IPR002172 (SMART); IPR002172 (G3DSA:4.10.400.GENE3D); TRANSMEMBRANE (PHOBIUS); CYTOPLASMIC_DOMAIN (PHOBIUS); NON_CYTOPLASMIC_DOMAIN (PHOBIUS); IPR002172 (SUPERFAMILY); TMhelix (TMHMM)                                                                                                                                                                                                                                                                                                 |
| 2806 | c83452_g1_i1_len_308_path_1_0_307_0                         | 4    | zinc finger protein 37-like                                                                                                                                                | 103 | 2.98E-17 | 64.90% | 0.11   | IPR015880 (SMART); IPR007087 (PFAM); PF13465 (PFAM); IPR013087 (G3DSA:3.30.160.GENE3D); IPR013087 (G3DSA:3.30.160.GENE3D); PTHR24409 (PANTHER); IPR007087 (PROSITE_PATTERNS); IPR007087 (PROSITE_PATTERNS); IPR007087 (PROSITE_PROFILES); IPR007087 (PROSITE_PROFILES); SSF57667 (SUPERFAMILY); SSF57667 (SUPERFAMILY)                                                                                                                                                                  |
| 2807 | c83760_g1_i1_len_543_path_521_0_542_3                       | 8    | zinc finger protein 683 isoform x2                                                                                                                                         | 181 | 3.75E-15 | 52.10% | 0.098  | IPR015880 (SMART); PF13465 (PFAM); IPR013087 (G3DSA:3.30.160.GENE3D); IPR013087 (G3DSA:3.30.160.GENE3D); PTHR24409 (PANTHER); PTHR24409:SF14 (PANTHER); IPR007087 (PROSITE_PATTERNS); IPR007087 (PROSITE_PATTERNS); IPR007087 (PROSITE_PROFILES); IPR007087 (PROSITE_PROFILES); SSF57667 (SUPERFAMILY)                                                                                                                                                                                  |
| 2808 | c83852_g1_i1_len_503_path_1_0_502_2                         | 8    | zinc finger protein 484-like                                                                                                                                               | 167 | 6.37E-47 | 63.20% | 0.119  | IPR015880 (SMART); IPR013087 (G3DSA:3.30.160.GENE3D); IPR013087 (G3DSA:3.30.160.GENE3D); IPR013087 (G3DSA:3.30.160.GENE3D); PF13465 (PFAM); PTHR24409 (PANTHER); IPR007087 (PROSITE_PATTERNS); IPR007087 (PROSITE_PATTERNS); IPR007087 (PROSITE_PATTERNS); IPR007087 (PROSITE_PATTERNS); IPR007087 (PROSITE_PROFILES); IPR007087 (PROSITE_PROFILES); IPR007087 (PROSITE_PROFILES); IPR007087 (PROSITE_PROFILES); SSF57667 (SUPERFAMILY); SSF57667 (SUPERFAMILY); SSF57667 (SUPERFAMILY) |
| 2809 | c83913_g1_i1_len_276_path_1_0_275_1                         | 5    | prenylcysteine oxidase                                                                                                                                                     | 92  | 1.32E-13 | 62.10% | 0.097  | IPR010795 (PFAM); IPR017046 (PANTHER)                                                                                                                                                                                                                                                                                                                                                                                                                                                   |
| 2810 | c8405_g1_i1_len_461_path_439_0_88_528_8_9_104_544_105_460_3 | 2782 | ribosomal protein s26                                                                                                                                                      | 154 | 2.07E-59 | 89.80% | 0.103  | IPR000892 (PFAM); IPR000892 (PANTHER); IPR000892 (PROSITE_PATTERNS)                                                                                                                                                                                                                                                                                                                                                                                                                     |
| 2811 | c84085_g1_i1_len_538_path_1_0_537_0                         | 15   | dnaj homolog subfamily c member 3                                                                                                                                          | 180 | 6.14E-73 | 74.00% | 0.103  | Coil (COILS); IPR019734 (SMART); IPR013105 (PFAM); IPR011990 (G3DSA:1.25.40.GENE3D); PF13414 (PFAM); IPR011990 (G3DSA:1.25.40.GENE3D); PTHR24078 (PANTHER); PTHR24078:SF132 (PANTHER); IPR019734 (PROSITE_PROFILES); IPR019734 (PROSITE_PROFILES); IPR013026 (PROSITE_PROFILES); IPR013026 (PROSITE_PROFILES); SSF48452 (SUPERFAMILY); SSF48452 (SUPERFAMILY)                                                                                                                           |
| 2812 | c84136_g1_i1_len_263_path_241_0_262_5                       | 6    | cadherin-related tumor suppressor                                                                                                                                          | 87  | 2.95E-27 | 71.10% | 0.099  | IPR002126 (PRINTS); IPR002126 (SMART); IPR002126 (PFAM); IPR002126 (G3DSA:2.60.40.GENE3D); PTHR24027:SF268 (PANTHER); PTHR24027 (PANTHER); IPR002126 (PROSITE_PROFILES); IPR015919 (SUPERFAMILY)                                                                                                                                                                                                                                                                                        |
| 2813 | c8414_g1_i1_len_294_path_1_0_293_0                          | 8    | zinc finger protein 271 (zinc finger protein 7) (zinc finger protein znfphe133) (epstein-barr virus-induced zinc finger protein) (znf-eb) (ct-zfp48) (zinc finger protein) | 98  | 5.17E-18 | 65.40% | 0.1    | IPR015880 (SMART); PF13465 (PFAM); IPR013087 (G3DSA:3.30.160.GENE3D); PF13894 (PFAM); IPR013087 (G3DSA:3.30.160.GENE3D); IPR013087 (G3DSA:3.30.160.GENE3D); PTHR24409 (PANTHER); IPR007087 (PROSITE_PATTERNS); IPR007087 (PROSITE_PATTERNS); IPR007087 (PROSITE_PATTERNS); IPR007087 (PROSITE_PROFILES); IPR007087 (PROSITE_PROFILES); SSF57667 (SUPERFAMILY); SSF57667 (SUPERFAMILY)                                                                                                   |
| 2814 | c8416_g2_i1_len_583_path_469_0_582_5                        | 16   | limbic system-associated membrane protein                                                                                                                                  | 194 | 4.31E-58 | 69.60% | 0.125  | IPR003598 (SMART); IPR003599 (SMART); IPR013098 (PFAM); IPR013783 (G3DSA:2.60.40.GENE3D); IPR013783 (G3DSA:2.60.40.GENE3D); PF13895 (PFAM); PTHR19831:SF47 (PANTHER); PTHR19831 (PANTHER); IPR007110 (PROSITE_PROFILES); IPR007110 (PROSITE_PROFILES); SSF48726 (SUPERFAMILY); SSF48726 (SUPERFAMILY)                                                                                                                                                                                   |





|      |                                                              |     |                                                                               |     |           |        |       |                                                                                                                                                                                                                                                                                                                                                                                                                                                                                                                                                                                                                                                    |
|------|--------------------------------------------------------------|-----|-------------------------------------------------------------------------------|-----|-----------|--------|-------|----------------------------------------------------------------------------------------------------------------------------------------------------------------------------------------------------------------------------------------------------------------------------------------------------------------------------------------------------------------------------------------------------------------------------------------------------------------------------------------------------------------------------------------------------------------------------------------------------------------------------------------------------|
| 2825 | c84918_g1_i1_len_403_path_381_0_402_0                        | 7   | cadherin- partial                                                             | 135 | 6.38E-49  | 78.80% | 0.13  | IPR002126 (PRINTS); IPR002126 (G3DSA:2.60.40.GENE3D); PTHR24027:SF45 (PANTHER); PTHR24027 (PANTHER); IPR020894 (PROSITE_PATTERNS); IPR002126 (PROSITE_PROFILES); IPR002126 (PROSITE_PROFILES); IPR015919 (SUPERFAMILY); IPR015919 (SUPERFAMILY)                                                                                                                                                                                                                                                                                                                                                                                                    |
| 2826 | c8513_g1_i1_len_1905_path_1883_0_1904_1                      | 137 | von willebrand factor a domain-containing protein 8                           | 635 | 0         | 74.60% | 0.175 | IPR011704 (PFAM); IPR027417 (G3DSA:3.40.50.GENE3D); PTHR21610 (PANTHER); PTHR21610:SF9 (PANTHER); IPR027417 (SUPERFAMILY); IPR027417 (SUPERFAMILY)                                                                                                                                                                                                                                                                                                                                                                                                                                                                                                 |
| 2827 | c8513_g2_i1_len_172_path_3914_0_171_4                        | 2   | von willebrand factor a domain-containing protein 8- partial                  | 57  | 1.24E-24  | 93.20% | 0.102 | IPR011704 (PFAM); PTHR21610:SF9 (PANTHER); PTHR21610 (PANTHER)                                                                                                                                                                                                                                                                                                                                                                                                                                                                                                                                                                                     |
| 2828 | c85247_g1_i1_len_338_path_1_0_337_0                          | 4   | villin-1-like isoform x2                                                      | 113 | 1.40E-41  | 73.10% | 0.101 | IPR007122 (PRINTS); IPR007122 (SMART); IPR029006 (G3DSA:3.40.20.GENE3D); IPR007123 (PFAM); IPR007122 (PANTHER); SSF55753 (SUPERFAMILY)                                                                                                                                                                                                                                                                                                                                                                                                                                                                                                             |
| 2829 | c85284_g1_i1_len_253_path_231_0_252_5                        | 6   | carboxypeptidase d                                                            | 84  | 2.78E-18  | 68.40% | 0.107 | PF13620 (PFAM); IPR014766 (G3DSA:2.60.40.GENE3D); PTHR11532 (PANTHER); IPR027062 (PTHR11532:PANTHER); IPR008969 (SUPERFAMILY) IPR002347 (PRINTS); IPR002198 (PRINTS); IPR002198 (PFAM); IPR016040 (G3DSA:3.40.50.GENE3D); PTHR24316 (PANTHER); PTHR24316:SF251 (PANTHER); IPR020904 (PROSITE_PATTERNS); SSF51735 (SUPERFAMILY)                                                                                                                                                                                                                                                                                                                     |
| 2830 | c8530_g1_i1_len_1549_path_1_0_1548_3                         | 248 | hydroxyacyl dehydrogenase                                                     | 517 | 1.00E-128 | 83.60% | 0.202 | IPR015880 (SMART); PF13465 (PFAM); IPR013087 (G3DSA:3.30.160.GENE3D); IPR013087 (G3DSA:3.30.160.GENE3D); PTHR23228 (PANTHER); PTHR23228:SF106 (PANTHER); IPR007087 (PROSITE_PATTERNS); IPR007087 (PROSITE_PROFILES); IPR007087 (PROSITE_PROFILES); SSF57667 (SUPERFAMILY)                                                                                                                                                                                                                                                                                                                                                                          |
| 2831 | c85818_g1_i1_len_201_path_1_0_200_4                          | 2   | zinc finger protein gfi- partial                                              | 67  | 1.86E-38  | 98.20% | 0.14  | IPR006589 (SMART); IPR013781 (G3DSA:3.20.20.GENE3D); IPR006047 (PFAM); IPR015902 (PANTHER); PTHR10357:SF77 (PANTHER); TRANSMEMBRANE (PHOBIUS); NON_CYTOPLASMIC_DOMAIN (PHOBIUS); TRANSMEMBRANE (PHOBIUS); CYTOPLASMIC_DOMAIN (PHOBIUS); CYTOPLASMIC_DOMAIN (PHOBIUS); IPR017853 (SUPERFAMILY); TMhelix (TMHMM); TMhelix (TMHMM)                                                                                                                                                                                                                                                                                                                    |
| 2832 | c8592_g1_i1_len_2087_path_2065_0_1583_3<br>649_1584_2086_5   | 169 | maltase partial                                                               | 695 | 7.71E-61  | 65.00% | 0.147 | IPR002110 (PRINTS); IPR002110 (SMART); IPR020683 (PFAM); IPR020683 (G3DSA:1.25.40.GENE3D); PTHR24188 (PANTHER); IPR002110 (PROSITE_PROFILES); IPR002110 (PROSITE_PROFILES); IPR002110 (PROSITE_PROFILES); IPR020683 (PROSITE_PROFILES); IPR020683 (SUPERFAMILY)                                                                                                                                                                                                                                                                                                                                                                                    |
| 2833 | c86240_g1_i1_len_376_path_1_0_375_4                          | 4   | achain crystal structure of artificial ankyrin repeat protein_ank 1d4         | 125 | 4.51E-14  | 59.10% | 0.232 | IPR025705 (PRINTS); IPR029018 (G3DSA:3.30.379.GENE3D); IPR029019 (PFAM); IPR015883 (PFAM); IPR013781 (G3DSA:3.20.20.GENE3D); PTHR22600 (PANTHER); PTHR22600:SF4 (PANTHER); CYTOPLASMIC_DOMAIN (PHOBIUS); NON_CYTOPLASMIC_DOMAIN (PHOBIUS); NON_CYTOPLASMIC_DOMAIN (PHOBIUS); TRANSMEMBRANE (PHOBIUS); TRANSMEMBRANE (PHOBIUS); IPR029018 (SUPERFAMILY); IPR017853 (SUPERFAMILY); TMhelix (TMHMM); TMhelix (TMHMM)                                                                                                                                                                                                                                  |
| 2834 | c8626_g1_i1_len_1178_path_1206_0_1177_1                      | 96  | beta-n-acetylglucosaminidase-like partial                                     | 393 | 1.39E-83  | 59.30% | 0.126 | IPR000668 (PRINTS); IPR000668 (SMART); IPR000010 (SMART); IPR013201 (SMART); IPR013201 (PFAM); G3DSA:3.10.450.10 (GENE3D); G3DSA:3.90.70.10 (GENE3D); IPR000010 (PFAM); IPR000668 (PFAM); IPR013128 (PANTHER); PTHR12411:SF316 (PANTHER); IPR025660 (PROSITE_PATTERNS); IPR018073 (PROSITE_PATTERNS); IPR018073 (PROSITE_PATTERNS); IPR000169 (PROSITE_PATTERNS); NON_CYTOPLASMIC_DOMAIN (PHOBIUS); NON_CYTOPLASMIC_DOMAIN (PHOBIUS); TRANSMEMBRANE (PHOBIUS); CYTOPLASMIC_DOMAIN (PHOBIUS); TRANSMEMBRANE (PHOBIUS); IPR020381 (PRODOM); SSF54401 (SUPERFAMILY); SSF54403 (SUPERFAMILY); SSF54403 (SUPERFAMILY); TMhelix (TMHMM); TMhelix (TMHMM) |
| 2835 | c8661_g1_i1_len_2206_path_1_0_2205_2                         | 105 | cysteine proteinase cg12163                                                   | 735 | 0         | 66.60% | 0.102 | IPR001245 (PRINTS); IPR020635 (SMART); G3DSA:1.10.510.10 (GENE3D); G3DSA:3.30.200.20 (GENE3D); IPR001245 (PFAM); PTHR24418 (PANTHER); PTHR24418:SF185 (PANTHER); IPR008266 (PROSITE_PATTERNS); IPR000719 (PROSITE_PROFILES); IPR011009 (SUPERFAMILY)                                                                                                                                                                                                                                                                                                                                                                                               |
| 2836 | c86626_g1_i1_len_329_path_307_0_328_0                        | 4   | tyrosine-protein kinase shark                                                 | 110 | 2.68E-46  | 82.80% | 0.108 | IPR001314 (PRINTS); IPR001254 (SMART); G3DSA:2.40.10.10 (GENE3D); G3DSA:2.40.10.10 (GENE3D); G3DSA:2.40.10.10 (GENE3D); IPR001254 (PFAM); PTHR24265 (PANTHER); IPR018114 (PROSITE_PATTERNS); IPR018114 (PROSITE_PATTERNS); IPR001254 (PROSITE_PROFILES); IPR009003 (SUPERFAMILY)                                                                                                                                                                                                                                                                                                                                                                   |
| 2837 | c8665_g1_i1_len_933_path_1_0_932_5                           | 88  | urokinase-type plasminogen activator                                          | 311 | 7.24E-66  | 54.10% | 0.1   | IPR003410 (PFAM); PTHR24273 (PANTHER); PTHR24273:SF29 (PANTHER); IPR003410 (PROSITE_PROFILES)                                                                                                                                                                                                                                                                                                                                                                                                                                                                                                                                                      |
| 2838 | c8679_g1_i1_len_831_path_1734_0_44_1778<br>45_67_70_68_830_3 | 36  | fibrillin-2 isoform x3                                                        | 277 | 3.62E-25  | 59.40% | 0.114 | IPR011641 (PFAM)                                                                                                                                                                                                                                                                                                                                                                                                                                                                                                                                                                                                                                   |
| 2839 | c8679_g1_i1_len_831_path_1734_0_44_1778<br>45_67_70_68_830_5 | 36  | von willebrand factor type egf and pentraxin domain-containing protein 1-like | 277 | 7.81E-08  | 44.60% | 0.145 |                                                                                                                                                                                                                                                                                                                                                                                                                                                                                                                                                                                                                                                    |

|      |                                                                      |     |                                                   |     |           |        |        |                                                                                                                                                                                                                                                                                                                                                                                                                                                                                                                                                                              |
|------|----------------------------------------------------------------------|-----|---------------------------------------------------|-----|-----------|--------|--------|------------------------------------------------------------------------------------------------------------------------------------------------------------------------------------------------------------------------------------------------------------------------------------------------------------------------------------------------------------------------------------------------------------------------------------------------------------------------------------------------------------------------------------------------------------------------------|
| 2840 | c87204_g2_i1_len_179_path_360_0_30_117_31_58_25_59_150_117_151_178_3 | 0   | protein orf34                                     | 60  | 2.89E-06  | 63.50% | 0.167  | no IPS match                                                                                                                                                                                                                                                                                                                                                                                                                                                                                                                                                                 |
| 2841 | c87461_g1_i1_len_194_path_1_0_193_1                                  | 1   | receptor protein tyrosine                         | 65  | 1.39E-26  | 80.70% | 0.123  | IPR000242 (PFAM); IPR029021 (G3DSA:3.90.190.GENE3D); IPR000242 (PROSITE_PROFILES); IPR029021 (SUPERFAMILY)                                                                                                                                                                                                                                                                                                                                                                                                                                                                   |
| 2842 | c87663_g1_i1_len_445_path_423_0_444_1                                | 6   | gastrula zinc finger protein - partial            | 148 | 8.62E-28  | 60.00% | 0.11   | IPR015880 (SMART); PF13913 (PFAM); IPR007087 (PFAM); IPR013087 (G3DSA:3.30.160.GENE3D); IPR013087 (G3DSA:3.30.160.GENE3D); PF13465 (PFAM); PTHR24409 (PANTHER); PTHR24409:SF14 (PANTHER); IPR007087 (PROSITE_PATTERNS); IPR007087 (PROSITE_PATTERNS); IPR007087 (PROSITE_PATTERNS); IPR007087 (PROSITE_PATTERNS); IPR007087 (PROSITE_PROFILES); IPR007087 (PROSITE_PROFILES); IPR007087 (PROSITE_PROFILES); IPR007087 (PROSITE_PROFILES); IPR007087 (PROSITE_PROFILES); IPR007087 (PROSITE_PROFILES); SSF57667 (SUPERFAMILY); SSF57667 (SUPERFAMILY); SSF57667 (SUPERFAMILY) |
| 2843 | c8769_g1_i1_len_1212_path_2794_0_1211_1                              | 45  | protein gdp2 homolog                              | 404 | 3.25E-157 | 75.80% | 0.187  | IPR002589 (SMART); G3DSA:3.40.220.10 (GENE3D); IPR002589 (PFAM); PTHR11106:SF59 (PANTHER); PTHR11106 (PANTHER); IPR002589 (PROSITE_PROFILES); SSF52949 (SUPERFAMILY)                                                                                                                                                                                                                                                                                                                                                                                                         |
| 2844 | c8774_g1_i1_len_403_path_1_0_402_0                                   | 8   | phosphatidylinositol phosphatase partial          | 135 | 7.39E-38  | 65.90% | 0.256  | IPR000242 (PRINTS); IPR000242 (SMART); IPR000242 (PFAM); IPR029021 (G3DSA:3.90.190.GENE3D); PTHR19134:SF251 (PANTHER); PTHR19134 (PANTHER); IPR016130 (PROSITE_PATTERNS); IPR000242 (PROSITE_PROFILES); IPR000387 (PROSITE_PROFILES); IPR029021 (SUPERFAMILY)                                                                                                                                                                                                                                                                                                                |
| 2845 | c8774_g2_i1_len_287_path_761_0_286_2                                 | 4   | receptor-type tyrosine-protein phosphatase mu     | 95  | 2.16E-17  | 66.40% | 0.106  | IPR000242 (PRINTS); IPR029021 (G3DSA:3.90.190.GENE3D); IPR000242 (PFAM); PTHR19134 (PANTHER); IPR000242 (PROSITE_PROFILES); IPR029021 (SUPERFAMILY)                                                                                                                                                                                                                                                                                                                                                                                                                          |
| 2846 | c87892_g1_i1_len_670_path_648_0_669_5                                | 12  | leucine-rich repeat-containing protein 15         | 223 | 1.01E-25  | 54.70% | 0.131  | PR00019 (PRINTS); IPR003591 (SMART); IPR001611 (PFAM); G3DSA:3.80.10.10 (GENE3D); IPR001611 (PFAM); PTHR24365 (PANTHER); IPR001611 (PROSITE_PROFILES); SSF52058 (SUPERFAMILY)                                                                                                                                                                                                            |
| 2847 | c87899_g1_i1_len_506_path_1_0_505_5                                  | 17  | translocation protein sec63 homolog               | 168 | 1.23E-73  | 80.60% | 0.788Y | IPR001623 (PRINTS); IPR001623 (SMART); IPR001623 (PFAM); IPR001623 (G3DSA:1.10.287.GENE3D); PTHR24075:SF0 (PANTHER); IPR027137 (PANTHER); NON_CYTOPLASMIC_DOMAIN (PHOBIUS); NON_CYTOPLASMIC_DOMAIN (PHOBIUS); TRANSMEMBRANE (PHOBIUS); CYTOPLASMIC_DOMAIN (PHOBIUS); TRANSMEMBRANE (PHOBIUS); IPR001623 (PROSITE_PROFILES); SignalP-noTM (SIGNALP_EUK); IPR001623 (SUPERFAMILY); TMhelix (TMHMM); TMhelix (TMHMM)                                                                                                                                                            |
| 2848 | c88033_g1_i1_len_150_path_128_0_149_0                                | 2   | suppressor of tumorigenicity 14 protein           | 50  | 2.29E-08  | 76.20% | 0.098  | IPR001254 (PFAM); G3DSA:2.40.10.10 (GENE3D); PTHR24265 (PANTHER); IPR009003 (SUPERFAMILY)                                                                                                                                                                                                                                                                                                                                                                                                                                                                                    |
| 2849 | c88063_g1_i1_len_306_path_284_0_305_1                                | 6   | aldehyde oxidase                                  | 102 | 9.83E-28  | 72.50% | 0.125  | IPR008274 (PFAM); IPR008274 (G3DSA:3.30.365.GENE3D); PTHR11908 (PANTHER); PTHR11908:SF65 (PANTHER); IPR008274 (SUPERFAMILY)                                                                                                                                                                                                                                                                                                                                                                                                                                                  |
| 2850 | c8825_g1_i1_len_303_path_1_0_302_3                                   | 7   | threonine synthase-like 2                         | 89  | 2.75E-14  | 71.10% | 0.14   | PTHR10314 (PANTHER); IPR027457 (PTHR10314:PANTHER)                                                                                                                                                                                                                                                                                                                                                                                                                                                                                                                           |
| 2851 | c88784_g1_i1_len_250_path_1_0_249_0                                  | 4   | arylsulfatase b-like                              | 84  | 1.64E-26  | 74.80% | 0.114  | IPR000917 (PFAM); IPR017849 (G3DSA:3.40.720.GENE3D); PTHR10342:SF206 (PANTHER); PTHR10342 (PANTHER); IPR017850 (SUPERFAMILY)                                                                                                                                                                                                                                                                                                                                                                                                                                                 |
| 2852 | c88792_g1_i1_len_275_path_253_0_274_1                                | 4   | peptidylglycine alpha-hydroxylating monooxygenase | 92  | 2.42E-24  | 75.80% | 0.281  | IPR000323 (PFAM); IPR000323 (G3DSA:2.60.120.GENE3D); PTHR10680 (PANTHER); SIGNAL_PEPTIDE_H_REGION (PHOBIUS); SIGNAL_PEPTIDE (PHOBIUS); NON_CYTOPLASMIC_DOMAIN (PHOBIUS); SIGNAL_PEPTIDE_N_REGION (PHOBIUS); SIGNAL_PEPTIDE_C_REGION (PHOBIUS); IPR008977 (SUPERFAMILY); TMhelix (TMHMM)                                                                                                                                                                                                                                                                                      |
| 2853 | c8889_g2_i1_len_821_path_1067_0_126_533_127_820_3                    | 43  | parkinson disease 7 domain-containing             | 274 | 9.37E-102 | 73.30% | 0.236  | IPR002818 (PFAM); IPR029062 (G3DSA:3.40.50.GENE3D); PTHR11019 (PANTHER); PTHR11019:SF71 (PANTHER); IPR029062 (SUPERFAMILY)                                                                                                                                                                                                                                                                                                                                                                                                                                                   |
| 2854 | c8889_g2_i2_len_1054_path_173_0_359_533_360_1053_3                   | 60  | parkinson disease 7 domain-containing             | 352 | 9.33E-101 | 73.00% | 0.236  | IPR002818 (PFAM); IPR029062 (G3DSA:3.40.50.GENE3D); PTHR11019 (PANTHER); PTHR11019:SF71 (PANTHER); IPR029062 (SUPERFAMILY)                                                                                                                                                                                                                                                                                                                                                                                                                                                   |
| 2855 | c8891_g1_i1_len_1988_path_1_0_1987_5                                 | 93  | glucose dehydrogenase                             | 662 | 0         | 66.90% | 0.156  | IPR007867 (PFAM); IPR000172 (PFAM); G3DSA:3.50.50.60 (GENE3D); IPR012132 (PIRSF); PTHR11552:SF77 (PANTHER); PTHR11552 (PANTHER); IPR000172 (PROSITE_PATTERNS); CYTOPLASMIC_DOMAIN (PHOBIUS); NON_CYTOPLASMIC_DOMAIN (PHOBIUS); TRANSMEMBRANE (PHOBIUS); SSF54373 (SUPERFAMILY); SSF51905 (SUPERFAMILY); TMhelix (TMHMM)                                                                                                                                                                                                                                                      |
| 2856 | c8903_g1_i1_len_1315_path_1_0_1314_1                                 | 655 | mitochondrial matrix protein p33                  | 438 | 1.24E-85  | 67.40% | 0.136  | IPR003428 (G3DSA:3.10.280.GENE3D); IPR003428 (PFAM); PTHR10826 (PANTHER); PTHR10826:SF1 (PANTHER); IPR003428 (SUPERFAMILY)                                                                                                                                                                                                                                                                                                                                                                                                                                                   |

|      |                                         |     |                                       |     |           |        |        |                                                                                                                                                                                                                                                                                                                                                                                                                                                                                                                                                                                                                                           |
|------|-----------------------------------------|-----|---------------------------------------|-----|-----------|--------|--------|-------------------------------------------------------------------------------------------------------------------------------------------------------------------------------------------------------------------------------------------------------------------------------------------------------------------------------------------------------------------------------------------------------------------------------------------------------------------------------------------------------------------------------------------------------------------------------------------------------------------------------------------|
| 2857 | c8906_g1_i1_len_1163_path_2113_0_1162_0 | 49  | aael008062- partial                   | 388 | 2.67E-164 | 76.00% | 0.103  | IPR028974 (G3DSA:4.10.1080.GENE3D); IPR023413 (G3DSA:2.40.155.GENE3D); IPR003367 (PFAM); IPR008859 (PFAM); IPR013320 (G3DSA:2.60.120.GENE3D); PTHR10199:SF76 (PANTHER); PTHR10199 (PANTHER); IPR013032 (PROSITE_PATTERNS); IPR017897 (PROSITE_PROFILES); IPR017897 (PROSITE_PROFILES); IPR017897 (PROSITE_PROFILES); IPR008859 (PROSITE_PROFILES); IPR017897 (PROSITE_PROFILES); IPR017897 (PROSITE_PROFILES); IPR000742 (PROSITE_PROFILES); IPR017897 (PROSITE_PROFILES); IPR017897 (PROSITE_PROFILES); IPR017897 (PROSITE_PROFILES); IPR013320 (SUPERFAMILY); IPR028974 (SUPERFAMILY); IPR028974 (SUPERFAMILY); IPR028974 (SUPERFAMILY) |
| 2858 | c8906_g2_i1_len_1079_path_1057_0_1078_5 | 63  | aael008062- partial                   | 359 | 7.50E-118 | 90.90% | 0.1    | IPR013320 (G3DSA:2.60.120.GENE3D); IPR008859 (PFAM); PTHR10199 (PANTHER); IPR008859 (PROSITE_PROFILES); IPR013320 (SUPERFAMILY)                                                                                                                                                                                                                                                                                                                                                                                                                                                                                                           |
| 2859 | c8907_g1_i1_len_729_path_713_0_728_5    | 28  | epidermal growth factor receptor      | 243 | 7.33E-144 | 91.30% | 0.713Y | IPR001245 (PRINTS); IPR020635 (SMART); G3DSA:4.10.1140.10 (GENE3D); G3DSA:1.10.510.10 (GENE3D); IPR001245 (PFAM); G3DSA:3.30.200.20 (GENE3D); PTHR24416:SF95 (PANTHER); PTHR24416 (PANTHER); IPR008266 (PROSITE_PATTERNS); IPR017441 (PROSITE_PATTERNS); SIGNAL_PEPTIDE_H_REGION (PHOBIUS); NON_CYTOPLASMIC_DOMAIN (PHOBIUS); SIGNAL_PEPTIDE (PHOBIUS); SIGNAL_PEPTIDE_C_REGION (PHOBIUS); SIGNAL_PEPTIDE_N_REGION (PHOBIUS); IPR000719 (PROSITE_PROFILES); SignalP-noTM (SIGNALP_EUK); IPR011009 (SUPERFAMILY)                                                                                                                           |
| 2860 | c8907_g2_i1_len_379_path_357_0_378_0    | 11  | epidermal growth factor receptor-like | 127 | 1.40E-37  | 66.20% | 0.104  | IPR006212 (SMART); G3DSA:2.10.220.10 (GENE3D); IPR009030 (SUPERFAMILY)                                                                                                                                                                                                                                                                                                                                                                                                                                                                                                                                                                    |
| 2861 | c89109_g1_i1_len_286_path_264_0_285_4   | 3   | endothelin-converting enzyme 1-like   | 95  | 3.32E-15  | 64.20% | 0.866Y | IPR008753 (PFAM); IPR000718 (PANTHER); NON_CYTOPLASMIC_DOMAIN (PHOBIUS); SIGNAL_PEPTIDE_H_REGION (PHOBIUS); SIGNAL_PEPTIDE (PHOBIUS); SIGNAL_PEPTIDE_C_REGION (PHOBIUS); SIGNAL_PEPTIDE_N_REGION (PHOBIUS); SignalP-noTM (SIGNALP_EUK); SignalP-TM (SIGNALP_GRAM_POSITIVE); SSF55486 (SUPERFAMILY)                                                                                                                                                                                                                                                                                                                                        |
| 2862 | c89151_g1_i1_len_267_path_1_0_266_1     | 4   | n-acetylgalactosaminyltransferase 7   | 89  | 2.99E-49  | 94.20% | 0.11   | IPR029044 (G3DSA:3.90.550.GENE3D); IPR027791 (PFAM); PTHR11675 (PANTHER); PTHR11675:SF15 (PANTHER); IPR029044 (SUPERFAMILY)                                                                                                                                                                                                                                                                                                                                                                                                                                                                                                               |
| 2863 | c89557_g1_i1_len_439_path_417_0_438_4   | 12  | protein ndnf-like                     | 146 | 2.56E-19  | 50.10% | 0.147  | IPR019326 (PFAM); IPR013783 (G3DSA:2.60.40.GENE3D); IPR013783 (G3DSA:2.60.40.GENE3D); SignalP-TM (SIGNALP_GRAM_POSITIVE)                                                                                                                                                                                                                                                                                                                                                                                                                                                                                                                  |
| 2864 | c8967_g1_i1_len_1672_path_1650_0_1671_1 | 183 | polycomb protein eed                  | 557 | 0         | 85.10% | 0.127  | IPR001680 (SMART); IPR001680 (PFAM); IPR015943 (G3DSA:2.130.10.GENE3D); PTHR10253 (PANTHER); IPR019775 (PROSITE_PATTERNS); IPR017986 (PROSITE_PROFILES); IPR001680 (PROSITE_PROFILES); IPR001680 (PROSITE_PROFILES); IPR017986 (SUPERFAMILY)                                                                                                                                                                                                                                                                                                                                                                                              |
| 2865 | c89844_g1_i1_len_390_path_1_0_389_2     | 7   | phospholipase b-like 2 isoform x1     | 130 | 6.03E-34  | 70.90% | 0.173  | IPR007000 (PFAM); PTHR12370:SF3 (PANTHER); IPR007000 (PANTHER)                                                                                                                                                                                                                                                                                                                                                                                                                                                                                                                                                                            |
| 2866 | c9009_g1_i1_len_447_path_475_0_446_0    | 10  | guanylate cyclase 32e-like isoform x1 | 149 | 3.22E-35  | 65.10% | 0.116  | G3DSA:3.40.50.2300 (GENE3D); IPR001828 (PFAM); PTHR11920:SF281 (PANTHER); PTHR11920 (PANTHER); IPR028082 (SUPERFAMILY)                                                                                                                                                                                                                                                                                                                                                                                                                                                                                                                    |
| 2867 | c9032_g1_i1_len_664_path_692_0_663_3    | 20  | aquaporin partial                     | 222 | 1.48E-30  | 68.10% | 0.409Y | IPR000425 (PRINTS); IPR023271 (G3DSA:1.20.1080.GENE3D); IPR000425 (PFAM); IPR000425 (PANTHER); TRANSMEMBRANE (PHOBIUS); TRANSMEMBRANE (PHOBIUS); CYTOPLASMIC_DOMAIN (PHOBIUS); NON_CYTOPLASMIC_DOMAIN (PHOBIUS); CYTOPLASMIC_DOMAIN (PHOBIUS); IPR023271 (SUPERFAMILY); TMhelix (TMHMM); TMhelix (TMHMM)                                                                                                                                                                                                                                                                                                                                  |
| 2868 | c90468_g1_i1_len_241_path_1_0_240_4     | 4   | zinc finger protein partial           | 80  | 1.25E-17  | 61.40% | 0.099  | IPR015880 (SMART); IPR007087 (PFAM); IPR013087 (G3DSA:3.30.160.GENE3D); PF13465 (PFAM); IPR013087 (G3DSA:3.30.160.GENE3D); IPR013087 (G3DSA:3.30.160.GENE3D); PTHR24409 (PANTHER); IPR007087 (PROSITE_PATTERNS); IPR007087 (PROSITE_PATTERNS); IPR007087 (PROSITE_PATTERNS); IPR007087 (PROSITE_PROFILES); IPR007087 (PROSITE_PROFILES); IPR007087 (PROSITE_PROFILES); IPR007087 (PROSITE_PROFILES); SSF57667 (SUPERFAMILY); SSF57667 (SUPERFAMILY)                                                                                                                                                                                       |
| 2869 | c9162_g2_i1_len_482_path_994_0_481_2    | 16  | growth differentiation factor 8-like  | 160 | 8.33E-22  | 65.30% | 0.115  | IPR001839 (SMART); IPR001839 (PFAM); IPR029034 (G3DSA:2.10.90.GENE3D); PTHR11848:SF126 (PANTHER); IPR015615 (PANTHER); IPR017948 (PROSITE_PATTERNS); IPR001839 (PROSITE_PROFILES); IPR029034 (SUPERFAMILY)                                                                                                                                                                                                                                                                                                                                                                                                                                |

|      |                                                          |      |                                                                     |      |           |        |       |                                                                                                                                                                                                                                                                                                                                                                                                                                                                                                                                                                                                                                                      |
|------|----------------------------------------------------------|------|---------------------------------------------------------------------|------|-----------|--------|-------|------------------------------------------------------------------------------------------------------------------------------------------------------------------------------------------------------------------------------------------------------------------------------------------------------------------------------------------------------------------------------------------------------------------------------------------------------------------------------------------------------------------------------------------------------------------------------------------------------------------------------------------------------|
| 2870 | c9177_g1_i1_len_2328_path_53_0_2327_0                    | 4432 | heat shock 70 kda protein cognate 4                                 | 776  | 0         | 94.10% | 0.156 | Coil (COILS); IPR013126 (PRINTS); G3DSA:3.30.420.40 (GENE3D); IPR013126 (PFAM); G3DSA:3.90.640.10 (GENE3D); IPR029048 (G3DSA:1.20.1270.GENE3D); IPR029047 (G3DSA:2.60.34.GENE3D); G3DSA:3.30.30.30 (GENE3D); G3DSA:3.30.420.40 (GENE3D); PTHR19375 (PANTHER); PTHR19375:SF142 (PANTHER); IPR018181 (PROSITE_PATTERNS); IPR018181 (PROSITE_PATTERNS); IPR018181 (PROSITE_PATTERNS); CYTOPLASMIC_DOMAIN (PHOBIUS); TRANSMEMBRANE (PHOBIUS); CYTOPLASMIC_DOMAIN (PHOBIUS); TRANSMEMBRANE (PHOBIUS); NON_CYTOPLASMIC_DOMAIN (PHOBIUS); IPR029047 (SUPERFAMILY); IPR029048 (SUPERFAMILY); SSF53067 (SUPERFAMILY); SSF53067 (SUPERFAMILY); TMhelix (TMHMM) |
| 2871 | c9195_g1_i1_len_1044_path_53_0_1043_4                    | 192  | d-dopachrome decarboxylase-a-like                                   | 348  | 1.09E-24  | 62.70% | 0.139 | IPR001398 (PFAM); G3DSA:3.30.429.10 (GENE3D); IPR001398 (PANTHER); PTHR11954:SF22 (PANTHER); TRANSMEMBRANE (PHOBIUS); CYTOPLASMIC_DOMAIN (PHOBIUS); NON_CYTOPLASMIC_DOMAIN (PHOBIUS); IPR001398 (PRODOM); IPR014347 (SUPERFAMILY); TMhelix (TMHMM)                                                                                                                                                                                                                                                                                                                                                                                                   |
| 2872 | c9201_g1_i1_len_139_path_343_0_138_3                     | 0    | angiotensin-converting enzyme-like                                  | 47   | 1.50E-08  | 77.20% | 0.11  | IPR001548 (PFAM); SSF55486 (SUPERFAMILY)                                                                                                                                                                                                                                                                                                                                                                                                                                                                                                                                                                                                             |
| 2873 | c9220_g1_i1_len_789_path_49_0_95_144_96_155_48_156_788_0 | 27   | c3orf33 protein                                                     | 263  | 9.22E-32  | 45.40% | 0.102 | IPR016071 (G3DSA:2.40.50.GENE3D); NON_CYTOPLASMIC_DOMAIN (PHOBIUS); CYTOPLASMIC_DOMAIN (PHOBIUS); TRANSMEMBRANE (PHOBIUS); IPR016071 (SUPERFAMILY); TMhelix (TMHMM)                                                                                                                                                                                                                                                                                                                                                                                                                                                                                  |
| 2874 | c9220_g1_i2_len_729_path_49_0_95_48_96_728_0             | 27   | c3orf33 protein                                                     | 243  | 3.49E-21  | 44.70% | 0.099 | IPR016071 (G3DSA:2.40.50.GENE3D); IPR016071 (SUPERFAMILY)                                                                                                                                                                                                                                                                                                                                                                                                                                                                                                                                                                                            |
| 2875 | c9250_g1_i1_len_801_path_829_0_800_2                     | 108  | 39s ribosomal protein mitochondrial                                 | 267  | 8.63E-107 | 73.00% | 0.102 | IPR008914 (G3DSA:3.90.280.GENE3D); IPR008914 (PFAM); PTHR11362 (PANTHER); PTHR11362:SF16 (PANTHER); IPR008914 (SUPERFAMILY)                                                                                                                                                                                                                                                                                                                                                                                                                                                                                                                          |
| 2876 | c92604_g1_i1_len_429_path_407_0_428_0                    | 10   | low quality protein: kinase d-interacting substrate of 220 kda-like | 143  | 1.03E-65  | 86.00% | 0.104 | IPR002110 (SMART); IPR002110 (PFAM); IPR020683 (PFAM); IPR020683 (G3DSA:1.25.40.GENE3D); PTHR24139:SF10 (PANTHER); PTHR24139 (PANTHER); IPR002110 (PROSITE_PROFILES); IPR002110 (PROSITE_PROFILES); IPR002110 (PROSITE_PROFILES); IPR020683 (PROSITE_PROFILES); IPR020683 (SUPERFAMILY)                                                                                                                                                                                                                                                                                                                                                              |
| 2877 | c9303_g1_i1_len_3930_path_3941_0_3574_3_4_3575_3929_1    | 258  | disks large 1 tumor suppressor isoform x7                           | 1310 | 0         | 85.40% | 0.108 | Coil (COILS); IPR001478 (SMART); IPR001452 (SMART); IPR008145 (SMART); IPR001478 (G3DSA:2.30.42.GENE3D); G3DSA:2.30.30.40 (GENE3D); G3DSA:3.30.63.10 (GENE3D); IPR001478 (PFAM); IPR011511 (PFAM); IPR027417 (G3DSA:3.40.50.GENE3D); IPR001478 (G3DSA:2.30.42.GENE3D); IPR008145 (PFAM); IPR016313 (PANTHER); IPR001478 (PROSITE_PROFILES); IPR001452 (PROSITE_PROFILES); IPR001478 (PROSITE_PROFILES); IPR001478 (PROSITE_PROFILES); IPR008144 (PROSITE_PROFILES); IPR027417 (SUPERFAMILY); IPR001478 (SUPERFAMILY); IPR001478 (SUPERFAMILY); IPR001452 (SUPERFAMILY); IPR001478 (SUPERFAMILY)                                                      |
| 2878 | c9326_g1_i1_len_2552_path_53_0_2551_1                    | 206  | ribosome biogenesis protein bop1 homolog                            | 851  | 0         | 73.60% | 0.105 | IPR012953 (SMART); IPR001680 (SMART); IPR015943 (G3DSA:2.130.10.GENE3D); IPR001680 (PFAM); IPR012953 (PFAM); PTHR17605 (PANTHER); IPR019775 (PROSITE_PATTERNS); IPR017986 (PROSITE_PROFILES); IPR017986 (PROSITE_PROFILES); IPR001680 (PROSITE_PROFILES); IPR028598 (HAMAP); IPR001680 (PROSITE_PROFILES); IPR017986 (SUPERFAMILY)                                                                                                                                                                                                                                                                                                                   |
| 2879 | c93742_g1_i1_len_204_path_1_0_203_1                      | 4    | ankyrin repeat and sterile alpha motif domain-containing protein 1b | 68   | 8.53E-27  | 93.20% | 0.111 | IPR002110 (SMART); IPR020683 (PFAM); IPR020683 (G3DSA:1.25.40.GENE3D); PTHR24174 (PANTHER); IPR002110 (PROSITE_PROFILES); IPR020683 (PROSITE_PROFILES); IPR002110 (PROSITE_PROFILES); IPR020683 (SUPERFAMILY)                                                                                                                                                                                                                                                                                                                                                                                                                                        |
| 2880 | c94018_g1_i1_len_157_path_135_0_156_0                    | 0    | low-density lipoprotein receptor-related protein 4-like             | 53   | 1.93E-09  | 68.30% | 0.103 | IPR002172 (SMART); IPR002172 (G3DSA:4.10.400.GENE3D); IPR002172 (PFAM); PTHR10529 (PANTHER); IPR023415 (PROSITE_PATTERNS); IPR002172 (PROSITE_PROFILES); IPR002172 (SUPERFAMILY)                                                                                                                                                                                                                                                                                                                                                                                                                                                                     |
| 2881 | c94804_g1_i1_len_846_path_1_0_845_3                      | 52   | succinate-semialdehyde mitochondrial                                | 282  | 2.96E-125 | 80.40% | 0.19  | IPR015590 (PFAM); IPR016162 (G3DSA:3.40.605.GENE3D); IPR016163 (G3DSA:3.40.309.GENE3D); PTHR11699 (PANTHER); PTHR11699:SF49 (PANTHER); IPR029510 (PROSITE_PATTERNS); IPR016161 (SUPERFAMILY)                                                                                                                                                                                                                                                                                                                                                                                                                                                         |
| 2882 | c94840_g1_i1_len_1521_path_1499_0_1520_1                 | 120  | sepiapterin reductase-like                                          | 507  | 2.92E-81  | 63.70% | 0.112 | IPR002347 (PRINTS); IPR016040 (G3DSA:3.40.50.GENE3D); IPR002198 (PFAM); IPR006393 (TIGRFAM); PTHR24318:SF1 (PANTHER); PTHR24318 (PANTHER); SSF51735 (SUPERFAMILY)                                                                                                                                                                                                                                                                                                                                                                                                                                                                                    |

|      |                                                               |     |                                               |     |          |        |        |                                                                                                                                                                                                                                                                                                                                                                                                                                                                                                                                                                                                                                                                                                                                                                                                                                                                                                                                                                                                                                                                                                                                                                                     |
|------|---------------------------------------------------------------|-----|-----------------------------------------------|-----|----------|--------|--------|-------------------------------------------------------------------------------------------------------------------------------------------------------------------------------------------------------------------------------------------------------------------------------------------------------------------------------------------------------------------------------------------------------------------------------------------------------------------------------------------------------------------------------------------------------------------------------------------------------------------------------------------------------------------------------------------------------------------------------------------------------------------------------------------------------------------------------------------------------------------------------------------------------------------------------------------------------------------------------------------------------------------------------------------------------------------------------------------------------------------------------------------------------------------------------------|
|      |                                                               |     |                                               |     |          |        |        | IPR002172 (PRINTS); IPR000033 (SMART); IPR002172 (SMART); IPR000742 (SMART); IPR002172 (G3DSA:4.10.400.GENE3D); IPR002172 (G3DSA:4.10.400.GENE3D); IPR002172 (G3DSA:4.10.400.GENE3D); IPR002172 (G3DSA:4.10.400.GENE3D); IPR002172 (G3DSA:4.10.400.GENE3D); IPR002172 (G3DSA:4.10.400.GENE3D); IPR011042 (G3DSA:2.120.10.GENE3D); IPR002172 (PFAM); G3DSA:2.10.25.10 (GENE3D); IPR000033 (PFAM); PTHR12106:SF7 (PANTHER); PTHR12106 (PANTHER); IPR023415 (PROSITE_PATTERNS); IPR002172 (PROSITE_PROFILES); IPR002172 (PROSITE_PROFILES); IPR002172 (PROSITE_PROFILES); IPR000033 (PROSITE_PROFILES); IPR002172 (PROSITE_PROFILES); IPR002172 (PROSITE_PROFILES); IPR000033 (PROSITE_PROFILES); IPR002172 (PROSITE_PROFILES); IPR002172 (PROSITE_PROFILES); IPR000033 (PROSITE_PROFILES); IPR002172 (SUPERFAMILY); IPR002172 (SUPERFAMILY); IPR002172 (SUPERFAMILY); SSF63825 (SUPERFAMILY); IPR002172 (SUPERFAMILY); IPR002172 (SUPERFAMILY); IPR002172 (SUPERFAMILY); IPR002172 (SUPERFAMILY); |
| 2883 | c94870_g1_i1_len_2225_path_1_0_2224_2                         | 127 | sortilin-related receptor-like                | 741 | 0        | 68.50% | 0.136  |                                                                                                                                                                                                                                                                                                                                                                                                                                                                                                                                                                                                                                                                                                                                                                                                                                                                                                                                                                                                                                                                                                                                                                                     |
| 2884 | c94924_g1_i1_len_399_path_377_0_398_0                         | 29  | dipeptidyl peptidase 9                        | 133 | 1.22E-72 | 91.70% | 0.189  | IPR029058 (G3DSA:3.40.50.GENE3D); IPR001375 (PFAM); PTHR11731 (PANTHER); PTHR11731:SF110 (PANTHER); IPR029058 (SUPERFAMILY) IPR000980 (PRINTS); IPR001245 (PRINTS); IPR020635 (SMART); IPR000980 (SMART); IPR000980 (PFAM); G3DSA:3.30.200.20 (GENE3D); IPR000980 (G3DSA:3.30.505.GENE3D); G3DSA:1.10.510.10 (GENE3D); IPR001245 (PFAM); PTHR24418 (PANTHER); PTHR24418:SF192 (PANTHER); IPR017441 (PROSITE_PATTERNS); IPR008266 (PROSITE_PATTERNS); IPR000719 (PROSITE_PROFILES); IPR000980 (PROSITE_PROFILES); IPR011009 (SUPERFAMILY); IPR000980 (SUPERFAMILY); TMhelix (TMHMM)                                                                                                                                                                                                                                                                                                                                                                                                                                                                                                                                                                                                  |
| 2885 | c94963_g1_i1_len_1710_path_1_0_1709_1                         | 143 | tyrosine-protein kinase csk-like isoform x1   | 570 | 0        | 86.00% | 0.322  | IPR000242 (PRINTS); IPR003595 (SMART); IPR000242 (SMART); IPR000242 (PFAM); IPR021613 (PFAM); IPR029021 (G3DSA:3.90.190.GENE3D); PTHR19134:SF2 (PANTHER); PTHR19134 (PANTHER); IPR016130 (PROSITE_PATTERNS); NON_CYTOPLASMIC_DOMAIN (PHOBIUS); TRANSMEMBRANE (PHOBIUS); CYTOPLASMIC_DOMAIN (PHOBIUS); IPR000387 (PROSITE_PROFILES); IPR000242 (PROSITE_PROFILES); IPR029021 (SUPERFAMILY); TMhelix (TMHMM)                                                                                                                                                                                                                                                                                                                                                                                                                                                                                                                                                                                                                                                                                                                                                                          |
| 2886 | c94972_g1_i1_len_2850_path_1_0_2849_0                         | 210 | receptor-type tyrosine-protein phosphatase n2 | 950 | 0        | 76.30% | 0.103  | IPR010562 (SMART); IPR010562 (PFAM); PTHR11008:SF9 (PANTHER); PTHR11008 (PANTHER); SIGNAL_PEPTIDE_C_REGION (PHOBIUS); NON_CYTOPLASMIC_DOMAIN (PHOBIUS); SIGNAL_PEPTIDE_H_REGION (PHOBIUS); SIGNAL_PEPTIDE (PHOBIUS); SIGNAL_PEPTIDE_N_REGION (PHOBIUS); SignalP-noTM (SIGNALP_EUK); SignalP-noTM (SIGNALP_GRAM_NEGATIVE)                                                                                                                                                                                                                                                                                                                                                                                                                                                                                                                                                                                                                                                                                                                                                                                                                                                            |
| 2887 | c94977_g1_i1_len_1042_path_1_0_835_837_836_938_837_939_1041_1 | 48  | protein takeout                               | 347 | 1.77E-69 | 56.70% | 0.827Y | Coil (COILS); IPR005123 (PFAM); PTHR14049:SF9 (PANTHER); PTHR14049 (PANTHER)                                                                                                                                                                                                                                                                                                                                                                                                                                                                                                                                                                                                                                                                                                                                                                                                                                                                                                                                                                                                                                                                                                        |
| 2888 | c95033_g1_i1_len_467_path_1_0_466_1                           | 15  | prolyl 3-hydroxylase 1-like                   | 156 | 3.39E-27 | 77.10% | 0.104  | IPR015816 (G3DSA:2.30.230.GENE3D); IPR011030 (G3DSA:1.25.10.GENE3D); IPR001747 (PFAM); PTHR23345 (PANTHER); IPR001747 (PROSITE_PROFILES); IPR011030 (SUPERFAMILY)                                                                                                                                                                                                                                                                                                                                                                                                                                                                                                                                                                                                                                                                                                                                                                                                                                                                                                                                                                                                                   |
| 2889 | c95036_g1_i1_len_838_path_1_0_837_5                           | 22  | Apolipoprotein, partial                       | 279 | 7.81E-50 | 53.70% | 0.113  | IPR006589 (SMART); IPR004193 (PFAM); IPR013781 (G3DSA:3.20.20.GENE3D); IPR013780 (G3DSA:2.60.40.GENE3D); IPR006048 (PFAM); IPR006047 (PFAM); IPR013783 (G3DSA:2.60.40.GENE3D); IPR006407 (PIRSF); IPR015902 (PANTHER); PTHR10357:SF110 (PANTHER); IPR017853 (SUPERFAMILY); IPR014756 (SUPERFAMILY); SSF51011 (SUPERFAMILY)                                                                                                                                                                                                                                                                                                                                                                                                                                                                                                                                                                                                                                                                                                                                                                                                                                                          |
| 2890 | c95043_g1_i1_len_2377_path_2355_0_2376_1                      | 138 | #NAME?                                        | 792 | 0        | 79.00% | 0.181  |                                                                                                                                                                                                                                                                                                                                                                                                                                                                                                                                                                                                                                                                                                                                                                                                                                                                                                                                                                                                                                                                                                                                                                                     |



[illegible]

|      |                                                                     |     |                                                              |     |           |        |        |                                                                                                                                                                                                                                                                                                                                                                                                                                                                                          |
|------|---------------------------------------------------------------------|-----|--------------------------------------------------------------|-----|-----------|--------|--------|------------------------------------------------------------------------------------------------------------------------------------------------------------------------------------------------------------------------------------------------------------------------------------------------------------------------------------------------------------------------------------------------------------------------------------------------------------------------------------------|
| 2899 | c95408_g1_i1_len_381_path_359_0_380_1                               | 6   | agap012439-pa-like protein                                   | 127 | 2.19E-24  | 63.70% | 0.102  | IPR002110 (SMART); IPR020683 (PFAM); IPR020683 (G3DSA:1.25.40.GENE3D); PTHR24131 (PANTHER); PTHR24131:SF6 (PANTHER); IPR020683 (PROSITE_PROFILES); IPR002110 (PROSITE_PROFILES); IPR020683 (SUPERFAMILY)                                                                                                                                                                                                                                                                                 |
| 2901 | c9541_g1_i1_len_721_path_749_0_720_0                                | 24  | peptidyl-prolyl cis-trans isomerase nima-interacting 1       | 241 | 2.41E-94  | 89.40% | 0.104  | Coil (COILS); IPR001202 (SMART); IPR001202 (PFAM); IPR000297 (PFAM); G3DSA:2.20.70.10 (GENE3D); G3DSA:3.10.50.40 (GENE3D); PTHR10657 (PANTHER); IPR023058 (PROSITE_PATTERNS); IPR001202 (PROSITE_PATTERNS); CYTOPLASMIC_DOMAIN (PHOBIUS); NON_CYTOPLASMIC_DOMAIN (PHOBIUS); CYTOPLASMIC_DOMAIN (PHOBIUS); TRANSMEMBRANE (PHOBIUS); TRANSMEMBRANE (PHOBIUS); IPR001202 (PROSITE_PROFILES); IPR000297 (PROSITE_PROFILES); SSF54534 (SUPERFAMILY); IPR001202 (SUPERFAMILY); TMhelix (TMHMM) |
| 2900 | c95417_g1_i1_len_882_path_860_0_881_0                               | 22  | macrophage mannose receptor 1-like                           | 294 | 9.96E-39  | 47.90% | 0.101  | IPR001304 (SMART); IPR001304 (PFAM); IPR016186 (G3DSA:3.10.100.GENE3D); IPR016186 (G3DSA:3.10.100.GENE3D); IPR016186 (G3DSA:3.10.100.GENE3D); PTHR22803:SF16 (PANTHER); PTHR22803 (PANTHER); IPR001304 (PROSITE_PROFILES); IPR001304 (PROSITE_PROFILES); IPR016187 (SUPERFAMILY); IPR016187 (SUPERFAMILY); IPR016187 (SUPERFAMILY)                                                                                                                                                       |
| 2902 | c95473_g1_i1_len_480_path_1_0_479_1                                 | 11  | endoplasmic reticulum aminopeptidase 1- partial              | 160 | 2.01E-40  | 64.10% | 0.111  | IPR014782 (PRINTS); IPR014782 (PFAM); IPR001930 (PANTHER); PTHR11533:SF165 (PANTHER); SSF63737 (SUPERFAMILY); SSF55486 (SUPERFAMILY)                                                                                                                                                                                                                                                                                                                                                     |
| 2903 | c95474_g1_i1_len_2108_path_2086_0_2107_1                            | 237 | counting factor associated protein d-like                    | 703 | 0         | 77.10% | 0.172  | IPR000668 (PRINTS); IPR000668 (SMART); IPR013201 (SMART); IPR013201 (PFAM); IPR000668 (PFAM); G3DSA:3.90.70.10 (GENE3D); IPR013128 (PANTHER); PTHR12411:SF284 (PANTHER); IPR025660 (PROSITE_PATTERNS); IPR000169 (PROSITE_PATTERNS); IPR025661 (PROSITE_PATTERNS); TRANSMEMBRANE (PHOBIUS); CYTOPLASMIC_DOMAIN (PHOBIUS); NON_CYTOPLASMIC_DOMAIN (PHOBIUS); SSF54001 (SUPERFAMILY); TMhelix (TMHMM)                                                                                      |
| 2904 | c95504_g1_i1_len_1703_path_1_0_1702_1                               | 58  | plexin- partial                                              | 568 | 0         | 92.80% | 0.392Y | G3DSA:3.10.20.90 (GENE3D); IPR013548 (PFAM); PTHR22625 (PANTHER); IPR008936 (SUPERFAMILY)                                                                                                                                                                                                                                                                                                                                                                                                |
| 2905 | c95654_g1_i1_len_1554_path_1_0_1553_2                               | 100 | hypothetical protein CRE_06355                               | 518 | 7.34E-07  | 44.00% | 0.211  | no IPS match                                                                                                                                                                                                                                                                                                                                                                                                                                                                             |
| 2906 | c95654_g1_i1_len_1554_path_1_0_1553_5                               | 100 | collagen and calcium-binding egf domain-containing protein 1 | 518 | 5.94E-100 | 52.80% | 0.277  | Coil (COILS); IPR001881 (SMART); IPR000742 (SMART); G3DSA:2.10.25.10 (GENE3D); PF14670 (PFAM); G3DSA:2.10.25.10 (GENE3D); IPR008160 (PFAM); PTHR24023 (PANTHER); IPR013032 (PROSITE_PATTERNS); SIGNAL_PEPTIDE (PHOBIUS); SIGNAL_PEPTIDE_C_REGION (PHOBIUS); SIGNAL_PEPTIDE_N_REGION (PHOBIUS); SIGNAL_PEPTIDE_H_REGION (PHOBIUS); NON_CYTOPLASMIC_DOMAIN (PHOBIUS); IPR000742 (PROSITE_PROFILES); SSF57196 (SUPERFAMILY)                                                                 |
| 2907 | c95709_g1_i1_len_1467_path_1_0_1334_1336_1335_1400_1336_1401_1466_1 | 123 | nucleolar protein 58-like                                    | 489 | 0         | 82.90% | 0.152  | IPR012976 (SMART); IPR002687 (PFAM); IPR012976 (PFAM); IPR012974 (PFAM); PTHR10894 (PANTHER); IPR002687 (PROSITE_PROFILES); SSF89124 (SUPERFAMILY)                                                                                                                                                                                                                                                                                                                                       |



|      |                                       |      |                                                                    |      |           |        |         |                                                                                                                                                                                                                                                                                                                                                                                                                         |
|------|---------------------------------------|------|--------------------------------------------------------------------|------|-----------|--------|---------|-------------------------------------------------------------------------------------------------------------------------------------------------------------------------------------------------------------------------------------------------------------------------------------------------------------------------------------------------------------------------------------------------------------------------|
| 2915 | c95901_g1_i1_len_3230_path_1_0_3229_3 | 831  | coatomer subunit beta                                              | 1077 | 0         | 84.30% | 0.123   | IPR020472 (PRINTS); IPR001680 (SMART); IPR001680 (PFAM); IPR016453 (PIRSF); IPR015943 (G3DSA:2.130.10.GENE3D); IPR006692 (PFAM); PTHR19876 (PANTHER); PTHR19876:SF2 (PANTHER); IPR001680 (PROSITE_PROFILES); IPR001680 (PROSITE_PROFILES); IPR001680 (PROSITE_PROFILES); IPR001680 (PROSITE_PROFILES); IPR001680 (PROSITE_PROFILES); IPR017986 (PROSITE_PROFILES); IPR017986 (SUPERFAMILY); IPR011044 (SUPERFAMILY)     |
| 2916 | c95969_g1_i1_len_730_path_1_0_729_3   | 143  | myotrophin-like isoform 2                                          | 244  | 5.47E-55  | 84.20% | 0.134   | IPR002110 (SMART); IPR020683 (PFAM); IPR020683 (G3DSA:1.25.40.GENE3D); PTHR24152 (PANTHER); NON_CYTOPLASMIC_DOMAIN (PHOBIUS); CYTOPLASMIC_DOMAIN (PHOBIUS); TRANSMEMBRANE (PHOBIUS); IPR002110 (PROSITE_PROFILES); IPR020683 (PROSITE_PROFILES); IPR020683 (SUPERFAMILY); TMhelix (TMHMM)                                                                                                                               |
| 2917 | c95985_g1_i1_len_489_path_1_0_488_2   | 7    | partitioning defective 3 homolog                                   | 163  | 5.42E-50  | 66.70% | 0.11    | IPR001478 (SMART); IPR001478 (G3DSA:2.30.42.GENE3D); IPR001478 (G3DSA:2.30.42.GENE3D); IPR001478 (PFAM); PTHR16484 (PANTHER); IPR001478 (PROSITE_PROFILES); IPR001478 (PROSITE_PROFILES); IPR001478 (SUPERFAMILY); IPR001478 (SUPERFAMILY)                                                                                                                                                                              |
| 2918 | c95988_g1_i1_len_561_path_539_0_560_4 | 94   | md-2-related lipid-recognition                                     | 187  | 3.60E-24  | 53.60% | 0.785 Y | IPR003172 (SMART); IPR003172 (PFAM); IPR003172 (G3DSA:2.60.40.GENE3D); PTHR11306 (PANTHER); PTHR11306:SF4 (PANTHER); SIGNAL_PEPTIDE_C_REGION (PHOBIUS); SIGNAL_PEPTIDE_H_REGION (PHOBIUS); SIGNAL_PEPTIDE_N_REGION (PHOBIUS); SIGNAL_PEPTIDE (PHOBIUS); NON_CYTOPLASMIC_DOMAIN (PHOBIUS); SignalP-TM (SIGNALP_GRAM_POSITIVE); SignalP-noTM (SIGNALP_GRAM_NEGATIVE); SignalP-noTM (SIGNALP_EUK); IPR014756 (SUPERFAMILY) |
| 2919 | c96020_g1_i1_len_622_path_1_0_621_4   | 22   | hemocyte protein-glutamine gamma-glutamyltransferase-like          | 207  | 5.18E-87  | 76.70% | 0.102   | IPR013783 (G3DSA:2.60.40.GENE3D); IPR002931 (PFAM); IPR002931 (G3DSA:3.90.260.GENE3D); PTHR11590:SF40 (PANTHER); IPR023608 (PANTHER); SSF54001 (SUPERFAMILY); IPR014756 (SUPERFAMILY)                                                                                                                                                                                                                                   |
| 2920 | c96045_g1_i1_len_2226_path_1_0_2225_2 | 91   | endoplasmic reticulum mannosyl-oligosaccharide - alpha-mannosidase | 742  | 0         | 79.70% | 0.101   | IPR001382 (PRINTS); IPR001382 (G3DSA:1.50.10.GENE3D); IPR001382 (PFAM); IPR001382 (PANTHER); PTHR11742:SF7 (PANTHER); IPR001382 (SUPERFAMILY)                                                                                                                                                                                                                                                                           |
| 2921 | c96312_g1_i1_len_837_path_1_0_836_5   | 20   | afadin isoform x1                                                  | 279  | 1.35E-78  | 66.60% | 0.111   | IPR001478 (SMART); IPR001478 (PFAM); IPR001478 (G3DSA:2.30.42.GENE3D); PTHR10398 (PANTHER); IPR001478 (PROSITE_PROFILES); IPR001478 (SUPERFAMILY)                                                                                                                                                                                                                                                                       |
| 2922 | c96315_g1_i1_len_283_path_261_0_282_5 | 10   | Idlr2-a protein                                                    | 94   | 1.20E-12  | 57.10% | 0.12    | IPR002172 (PRINTS); IPR002172 (SMART); IPR002172 (G3DSA:4.10.400.GENE3D); IPR002172 (PFAM); IPR002172 (G3DSA:4.10.400.GENE3D); PTHR10529 (PANTHER); IPR023415 (PROSITE_PATTERNS); IPR002172 (PROSITE_PROFILES); IPR002172 (PROSITE_PROFILES); SignalP-TM (SIGNALP_GRAM_POSITIVE); IPR002172 (SUPERFAMILY)                                                                                                               |
| 2923 | c96328_g1_i1_len_346_path_324_0_345_3 | 6    | hemicentin-1                                                       | 116  | 2.08E-38  | 71.20% | 0.108   | PR01705 (PRINTS); IPR000884 (SMART); IPR000884 (PFAM); G3DSA:2.20.100.10 (GENE3D); PTHR19897 (PANTHER); IPR000884 (PROSITE_PROFILES); IPR000884 (PROSITE_PROFILES); IPR000884 (SUPERFAMILY); IPR000884 (SUPERFAMILY)                                                                                                                                                                                                    |
| 2924 | c96343_g1_i1_len_725_path_1_0_724_3   | 9    | laminin subunit alpha-1                                            | 242  | 1.72E-54  | 59.10% | 0.107   | IPR001791 (SMART); IPR013320 (G3DSA:2.60.120.GENE3D); IPR001791 (PFAM); PTHR10574:SF148 (PANTHER); PTHR10574 (PANTHER); IPR001791 (PROSITE_PROFILES); IPR013320 (SUPERFAMILY)                                                                                                                                                                                                                                           |
| 2925 | c96448_g1_i1_len_491_path_1_0_490_5   | 10   | inversin protein                                                   | 163  | 2.07E-67  | 77.00% | 0.464 Y | IPR002110 (SMART); IPR020683 (PFAM); IPR020683 (G3DSA:1.25.40.GENE3D); IPR002110 (PFAM); IPR020683 (G3DSA:1.25.40.GENE3D); PF13637 (PFAM); PTHR24178 (PANTHER); IPR020683 (PROSITE_PROFILES); IPR002110 (PROSITE_PROFILES); IPR002110 (PROSITE_PROFILES); IPR002110 (PROSITE_PROFILES); IPR002110 (PROSITE_PROFILES); SignalP-noTM (SIGNALP_EUK); IPR020683 (SUPERFAMILY)                                               |
| 2926 | c96470_g1_i1_len_1804_path_1_0_1803_5 | 2962 | carboxypeptidase b-like                                            | 601  | 9.10E-123 | 62.60% | 0.184   | IPR000834 (PRINTS); IPR000834 (SMART); IPR003146 (PFAM); IPR000834 (PFAM); IPR003146 (G3DSA:3.30.70.GENE3D); G3DSA:3.40.630.10 (GENE3D); PTHR11705 (PANTHER); IPR000834 (PROSITE_PATTERNS); NON_CYTOPLASMIC_DOMAIN (PHOBIUS); NON_CYTOPLASMIC_DOMAIN (PHOBIUS); TRANSMEMBRANE (PHOBIUS); CYTOPLASMIC_DOMAIN (PHOBIUS); TRANSMEMBRANE (PHOBIUS); IPR009020 (SUPERFAMILY); SSF53187 (SUPERFAMILY)                         |

|      |                                          |     |                                                    |     |           |        |       |                                                                                                                                                                                                                                                                                                                                                                                                                                                                                                                                                                                                                                                                                                                                                                                                                                                                                                                                                                                                                                       |
|------|------------------------------------------|-----|----------------------------------------------------|-----|-----------|--------|-------|---------------------------------------------------------------------------------------------------------------------------------------------------------------------------------------------------------------------------------------------------------------------------------------------------------------------------------------------------------------------------------------------------------------------------------------------------------------------------------------------------------------------------------------------------------------------------------------------------------------------------------------------------------------------------------------------------------------------------------------------------------------------------------------------------------------------------------------------------------------------------------------------------------------------------------------------------------------------------------------------------------------------------------------|
| 2927 | c96482_g1_i1_len_1810_path_1_0_1809_4    | 80  | zinc finger protein 239-like isoform x2            | 603 | 2.94E-78  | 68.30% | 0.116 | IPR015880 (SMART); IPR013087 (G3DSA:3.30.160.GENE3D); PF13465 (PFAM); IPR013087 (G3DSA:3.30.160.GENE3D); IPR013087 (G3DSA:3.30.160.GENE3D); IPR007087 (PFAM); IPR013087 (G3DSA:3.30.160.GENE3D); PTHR24377 (PANTHER); IPR007087 (PROSITE_PATTERNS); CYTOPLASMIC_DOMAIN (PHOBIUS); TRANSMEMBRANE (PHOBIUS); NON_CYTOPLASMIC_DOMAIN (PHOBIUS); TRANSMEMBRANE (PHOBIUS); NON_CYTOPLASMIC_DOMAIN (PHOBIUS); NON_CYTOPLASMIC_DOMAIN (PHOBIUS); CYTOPLASMIC_DOMAIN (PHOBIUS); TRANSMEMBRANE (PHOBIUS); TRANSMEMBRANE (PHOBIUS); CYTOPLASMIC_DOMAIN (PHOBIUS); TRANSMEMBRANE (PHOBIUS); IPR007087 (PROSITE_PROFILES); IPR007087 (PROSITE_PROFILES); IPR007087 (PROSITE_PROFILES); IPR007087 (PROSITE_PROFILES); IPR007087 (PROSITE_PROFILES); IPR007087 (PROSITE_PROFILES); SSF57667 (SUPERFAMILY); SSF57667 (SUPERFAMILY) |
| 2928 | c96492_g1_i1_len_349_path_327_0_348_4    | 12  | fukutin-related protein                            | 116 | 3.65E-09  | 60.40% | 0.198 | no IPS match                                                                                                                                                                                                                                                                                                                                                                                                                                                                                                                                                                                                                                                                                                                                                                                                                                                                                                                                                                                                                          |
| 2929 | c96606_g1_i1_len_1822_path_1800_0_1821_3 | 121 | tyrosine-protein kinase src64b                     | 608 | 0         | 79.70% | 0.1   | IPR000980 (PRINTS); IPR001245 (PRINTS); IPR001452 (PRINTS); IPR000980 (SMART); IPR001452 (SMART); IPR020635 (SMART); G3DSA:2.30.30.40 (GENE3D); IPR000980 (G3DSA:3.30.505.GENE3D); G3DSA:3.30.200.20 (GENE3D); IPR001452 (PFAM); G3DSA:1.10.510.10 (GENE3D); IPR001245 (PFAM); IPR000980 (PFAM); PTHR24418 (PANTHER); PTHR24418:SF35 (PANTHER); IPR008266 (PROSITE_PATTERNS); IPR017441 (PROSITE_PATTERNS); IPR000719 (PROSITE_PROFILES); IPR001452 (PROSITE_PROFILES); IPR000980 (PROSITE_PROFILES); IPR000980 (SUPERFAMILY); IPR001452 (SUPERFAMILY); IPR011009 (SUPERFAMILY)                                                                                                                                                                                                                                                                                                                                                                                                                                                       |
| 2930 | c96634_g1_i1_len_481_path_459_0_480_1    | 13  | gastrula zinc finger protein                       | 160 | 1.20E-11  | 60.10% | 0.113 | IPR015880 (SMART); IPR007087 (PFAM); IPR013087 (G3DSA:3.30.160.GENE3D); IPR007087 (PROSITE_PATTERNS); IPR007087 (PROSITE_PROFILES); IPR007087 (PROSITE_PROFILES); SSF57667 (SUPERFAMILY)                                                                                                                                                                                                                                                                                                                                                                                                                                                                                                                                                                                                                                                                                                                                                                                                                                              |
| 2931 | c96701_g1_i1_len_1994_path_1972_0_1993_5 | 147 | membrane metallo-endopeptidase-like 1-like         | 664 | 0         | 78.30% | 0.106 | IPR018497 (PRINTS); IPR018497 (PFAM); IPR024079 (G3DSA:3.40.390.GENE3D); IPR008753 (PFAM); PTHR11733:SF113 (PANTHER); IPR000718 (PANTHER); SSF55486 (SUPERFAMILY)                                                                                                                                                                                                                                                                                                                                                                                                                                                                                                                                                                                                                                                                                                                                                                                                                                                                     |
| 2932 | c96810_g1_i1_len_504_path_482_0_503_0    | 15  | ribonuclease oy                                    | 168 | 2.65E-39  | 58.90% | 0.153 | IPR001568 (PFAM); IPR001568 (G3DSA:3.90.730.GENE3D); IPR001568 (PANTHER); IPR001568 (SUPERFAMILY)                                                                                                                                                                                                                                                                                                                                                                                                                                                                                                                                                                                                                                                                                                                                                                                                                                                                                                                                     |
| 2933 | c96829_g1_i1_len_1254_path_1232_0_1253_0 | 41  | cyclin-h                                           | 418 | 2.95E-157 | 81.70% | 0.128 | IPR013763 (SMART); IPR006671 (PFAM); IPR013763 (G3DSA:1.10.472.GENE3D); IPR013763 (G3DSA:1.10.472.GENE3D); IPR027081 (TIGRFAM); IPR027081 (PTHR10026:PANTHER); IPR015429 (PANTHER); IPR013763 (SUPERFAMILY); IPR013763 (SUPERFAMILY)                                                                                                                                                                                                                                                                                                                                                                                                                                                                                                                                                                                                                                                                                                                                                                                                  |
| 2934 | c96850_g1_i1_len_698_path_676_0_697_1    | 40  | zinc finger protein 271-like                       | 233 | 1.91E-18  | 66.60% | 0.111 | IPR015880 (SMART); IPR013087 (G3DSA:3.30.160.GENE3D); PF13465 (PFAM); PTHR24409 (PANTHER); IPR007087 (PROSITE_PATTERNS); IPR007087 (PROSITE_PATTERNS); IPR007087 (PROSITE_PROFILES); IPR007087 (PROSITE_PROFILES); SSF57667 (SUPERFAMILY); TMhelix (TMHMM)                                                                                                                                                                                                                                                                                                                                                                                                                                                                                                                                                                                                                                                                                                                                                                            |
| 2935 | c96892_g1_i1_len_427_path_1_0_426_0      | 12  | epidermal growth factor receptor                   | 143 | 1.55E-52  | 73.90% | 0.101 | IPR006212 (SMART); G3DSA:2.10.220.10 (GENE3D); IPR000494 (PFAM); IPR000494 (G3DSA:3.80.20.GENE3D); PF14843 (PFAM); PTHR24416:SF88 (PANTHER); PTHR24416 (PANTHER); IPR009030 (SUPERFAMILY); SSF52058 (SUPERFAMILY)                                                                                                                                                                                                                                                                                                                                                                                                                                                                                                                                                                                                                                                                                                                                                                                                                     |
| 2936 | c96922_g1_i1_len_486_path_1_0_485_0      | 9   | low-density lipoprotein receptor-related protein 2 | 162 | 1.50E-81  | 87.10% | 0.12  | IPR002172 (PRINTS); IPR002172 (SMART); IPR002172 (G3DSA:4.10.400.GENE3D); IPR002172 (G3DSA:4.10.400.GENE3D); IPR002172 (G3DSA:4.10.400.GENE3D); PTHR10529 (PANTHER); IPR023415 (PROSITE_PATTERNS); IPR023415 (PROSITE_PATTERNS); IPR002172 (PROSITE_PROFILES); IPR002172 (PROSITE_PROFILES); IPR002172 (PROSITE_PROFILES); IPR002172 (PROSITE_PROFILES); IPR002172 (SUPERFAMILY); IPR002172 (SUPERFAMILY); IPR002172 (SUPERFAMILY); IPR002172 (SUPERFAMILY)                                                                                                                                                                                                                                                                                                                                                                                                                                                                                                                                                                           |



|      |                                                                                                      |     |                                                                         |     |           |        |        |                                                                                                                                                                                                                                                                                                                                                                                                                                                                                                                                                                                                                                                                                                   |
|------|------------------------------------------------------------------------------------------------------|-----|-------------------------------------------------------------------------|-----|-----------|--------|--------|---------------------------------------------------------------------------------------------------------------------------------------------------------------------------------------------------------------------------------------------------------------------------------------------------------------------------------------------------------------------------------------------------------------------------------------------------------------------------------------------------------------------------------------------------------------------------------------------------------------------------------------------------------------------------------------------------|
| 2937 | c96935_g1_i1_len_868_path_846_0_867_0                                                                | 37  | iduronate 2- partial                                                    | 290 | 2.04E-119 | 78.70% | 0.532Y | IPR000917 (PFAM); IPR017849 (G3DSA:3.40.720.GENE3D); PTHR10342 (PANTHER); PTHR10342:SF185 (PANTHER); IPR024607 (PROSITE_PATTERNS); SIGNAL_PEPTIDE (PHOBIUS); NON_CYTOPLASMIC_DOMAIN (PHOBIUS); SIGNAL_PEPTIDE_C_REGION (PHOBIUS); SIGNAL_PEPTIDE_H_REGION (PHOBIUS); SIGNAL_PEPTIDE_N_REGION (PHOBIUS); SignalP-noTM (SIGNALP_EUK); IPR017850 (SUPERFAMILY)                                                                                                                                                                                                                                                                                                                                       |
| 2938 | c96956_g1_i1_len_672_path_650_0_671_0                                                                | 22  | gastrula zinc finger                                                    | 224 | 1.20E-68  | 63.40% | 0.106  | IPR015880 (SMART); IPR013087 (G3DSA:3.30.160.GENE3D); IPR013087 (G3DSA:3.30.160.GENE3D); IPR013087 (G3DSA:3.30.160.GENE3D); PF13465 (PFAM); PTHR24409 (PANTHER); IPR007087 (PROSITE_PATTERNS); IPR007087 (PROSITE_PATTERNS); IPR007087 (PROSITE_PATTERNS); IPR007087 (PROSITE_PATTERNS); IPR007087 (PROSITE_PATTERNS); IPR007087 (PROSITE_PATTERNS); IPR007087 (PROSITE_PROFILES); SSF57667 (SUPERFAMILY); SSF57667 (SUPERFAMILY); SSF57667 (SUPERFAMILY)                       |
| 2939 | c96990_g1_i1_len_619_path_597_0_618_1                                                                | 16  | caseinolytic peptidase b protein homolog                                | 206 | 3.36E-53  | 76.20% | 0.102  | IPR002110 (SMART); IPR020683 (G3DSA:1.25.40.GENE3D); IPR002110 (PFAM); IPR020683 (PFAM); PTHR24193 (PANTHER); IPR002110 (PROSITE_PROFILES); IPR020683 (PROSITE_PROFILES); IPR002110 (PROSITE_PROFILES); IPR020683 (SUPERFAMILY)                                                                                                                                                                                                                                                                                                                                                                                                                                                                   |
| 2940 | c96993_g1_i1_len_788_path_766_0_787_2                                                                | 22  | oxysterol-binding protein 1- partial                                    | 262 | 1.48E-79  | 74.60% | 0.1    | IPR002110 (PRINTS); IPR002110 (SMART); PF13637 (PFAM); IPR020683 (G3DSA:1.25.40.GENE3D); IPR020683 (PFAM); PTHR24142 (PANTHER); IPR002110 (PROSITE_PROFILES); IPR002110 (PROSITE_PROFILES); IPR020683 (PROSITE_PROFILES); IPR020683 (SUPERFAMILY)                                                                                                                                                                                                                                                                                                                                                                                                                                                 |
| 2941 | c97055_g1_i1_len_600_path_1_0_599_1                                                                  | 47  | xanthine dehydrogenase                                                  | 200 | 6.89E-84  | 83.80% | 0.184  | IPR008274 (G3DSA:3.30.365.GENE3D); IPR008274 (PFAM); PTHR11908 (PANTHER); PTHR11908:SF32 (PANTHER); IPR008274 (SUPERFAMILY)                                                                                                                                                                                                                                                                                                                                                                                                                                                                                                                                                                       |
| 2942 | c97098_g1_i1_len_303_path_281_0_302_0                                                                | 4   | beta-galactosidase-1-like protein 2                                     | 101 | 2.79E-28  | 71.90% | 0.123  | IPR013781 (G3DSA:3.20.20.GENE3D); IPR001944 (PFAM); PTHR23421:SF66 (PANTHER); IPR001944 (PANTHER); IPR017853 (SUPERFAMILY)                                                                                                                                                                                                                                                                                                                                                                                                                                                                                                                                                                        |
| 2943 | c97102_g1_i1_len_2653_path_2558_0_2524_5083_2525_2556_5083_2557_2588_5083_2589_2620_5083_2621_2652_0 | 273 | mucosa-associated lymphoid tissue lymphoma translocation protein 1-like | 885 | 2.67E-64  | 46.70% | 0.17   | IPR015917 (SMART); IPR003599 (SMART); IPR003598 (SMART); IPR011029 (G3DSA:1.10.533.GENE3D); IPR013783 (G3DSA:2.60.40.GENE3D); IPR013783 (G3DSA:2.60.40.GENE3D); IPR000488 (PFAM); IPR013098 (PFAM); PF13895 (PFAM); IPR011600 (PFAM); IPR029030 (G3DSA:3.40.50.GENE3D); PTHR22576:SF20 (PANTHER); PTHR22576 (PANTHER); CYTOPLASMIC_DOMAIN (PHOBIUS); TRANSMEMBRANE (PHOBIUS); NON_CYTOPLASMIC_DOMAIN (PHOBIUS); IPR007110 (PROSITE_PROFILES); IPR007110 (PROSITE_PROFILES); IPR007110 (PROSITE_PROFILES); IPR001309 (PROSITE_PROFILES); SSF52129 (SUPERFAMILY); SSF48726 (SUPERFAMILY); SSF48726 (SUPERFAMILY); IPR011029 (SUPERFAMILY); SSF48726 (SUPERFAMILY); TMhelix (TMHMM); TMhelix (TMHMM) |
| 2944 | c97146_g1_i1_len_700_path_678_0_699_1                                                                | 39  | PREDICTED: uncharacterized protein LOC105389730 isoform X2              | 233 | 7.69E-43  | 57.00% | 0.123  | IPR000859 (SMART); IPR000859 (G3DSA:2.60.120.GENE3D); IPR000859 (PFAM); IPR000859 (PROSITE_PROFILES); IPR000859 (SUPERFAMILY)                                                                                                                                                                                                                                                                                                                                                                                                                                                                                                                                                                     |
| 2945 | c97181_g1_i1_len_497_path_475_0_496_5                                                                | 12  | lipoprotein receptor                                                    | 165 | 7.06E-31  | 62.70% | 0.277  | IPR000832 (PFAM); PTHR12011:SF260 (PANTHER); PTHR12011 (PANTHER); TRANSMEMBRANE (PHOBIUS); CYTOPLASMIC_DOMAIN (PHOBIUS); NON_CYTOPLASMIC_DOMAIN (PHOBIUS); CYTOPLASMIC_DOMAIN (PHOBIUS); TRANSMEMBRANE (PHOBIUS); TRANSMEMBRANE (PHOBIUS); NON_CYTOPLASMIC_DOMAIN (PHOBIUS); IPR017981 (PROSITE_PROFILES); TMhelix (TMHMM); TMhelix (TMHMM); TMhelix (TMHMM)                                                                                                                                                                                                                                                                                                                                      |
| 2946 | c97248_g1_i1_len_598_path_1_0_597_0                                                                  | 29  | kielin chordin-like protein isoform x2                                  | 200 | 1.35E-35  | 57.70% | 0.108  | IPR002223 (G3DSA:4.10.410.GENE3D); G3DSA:2.10.25.10 (GENE3D); IPR013032 (PROSITE_PATTERNS); IPR000436 (PROSITE_PROFILES); IPR000742 (PROSITE_PROFILES); IPR002223 (SUPERFAMILY); SSF57196 (SUPERFAMILY)                                                                                                                                                                                                                                                                                                                                                                                                                                                                                           |
| 2947 | c97322_g1_i1_len_286_path_1_0_285_1                                                                  | 4   | ---NA---                                                                | 95  |           |        | 0.107  | IPR002172 (SMART); IPR002172 (PFAM); IPR002172 (G3DSA:4.10.400.GENE3D); IPR023415 (PROSITE_PATTERNS); IPR002172 (PROSITE_PROFILES); IPR002172 (SUPERFAMILY)                                                                                                                                                                                                                                                                                                                                                                                                                                                                                                                                       |
| 2948 | c97358_g1_i1_len_239_path_217_0_238_2                                                                | 2   | beta-adrenergic receptor kinase 2-like                                  | 79  | 4.32E-48  | 98.60% | 0.098  | G3DSA:1.10.510.10 (GENE3D); IPR000719 (PFAM); PTHR24355:SF17 (PANTHER); PTHR24355 (PANTHER); IPR008271 (PROSITE_PATTERNS); IPR000719 (PROSITE_PROFILES); IPR011009 (SUPERFAMILY)                                                                                                                                                                                                                                                                                                                                                                                                                                                                                                                  |
| 2949 | c97375_g1_i1_len_544_path_522_0_543_1                                                                | 22  | deoxyribonuclease-1-like 2-like                                         | 181 | 8.45E-46  | 66.20% | 0.101  | IPR016202 (PRINTS); IPR016202 (SMART); IPR005135 (G3DSA:3.60.10.GENE3D); IPR005135 (PFAM); IPR016202 (PANTHER); IPR005135 (SUPERFAMILY)                                                                                                                                                                                                                                                                                                                                                                                                                                                                                                                                                           |

|      |                                          |    |                                                               |     |           |        |       |                                                                                                                                                                                                                                                                                                                                                                                                                                                                                                                                                                                                                                                                                                                                                             |
|------|------------------------------------------|----|---------------------------------------------------------------|-----|-----------|--------|-------|-------------------------------------------------------------------------------------------------------------------------------------------------------------------------------------------------------------------------------------------------------------------------------------------------------------------------------------------------------------------------------------------------------------------------------------------------------------------------------------------------------------------------------------------------------------------------------------------------------------------------------------------------------------------------------------------------------------------------------------------------------------|
| 2950 | c97409_g1_i1_len_691_path_1_0_690_3      | 18 | u4 u6 small nuclear ribonucleoprotein prp4                    | 231 | 2.84E-114 | 87.10% | 0.191 | IPR020472 (PRINTS); IPR001680 (SMART); IPR001680 (PFAM); IPR015943 (G3DSA:2.130.10.GENE3D); IPR027106 (PANTHER); IPR019775 (PROSITE_PATTERNS); IPR019775 (PROSITE_PATTERNS); IPR001680 (PROSITE_PROFILES); IPR001680 (PROSITE_PROFILES); IPR001680 (PROSITE_PROFILES); IPR017986 (PROSITE_PROFILES); IPR001680 (PROSITE_PROFILES); IPR017986 (SUPERFAMILY)                                                                                                                                                                                                                                                                                                                                                                                                  |
| 2951 | c9743_g1_i1_len_494_path_1_0_493_4       | 6  | coronin-2b-like isoform x2                                    | 165 | 5.16E-96  | 90.80% | 0.101 | IPR001680 (SMART); IPR015943 (G3DSA:2.130.10.GENE3D); IPR001680 (PFAM); IPR015505 (PANTHER); IPR019775 (PROSITE_PATTERNS); IPR017986 (PROSITE_PROFILES); IPR001680 (PROSITE_PROFILES); IPR017986 (SUPERFAMILY)                                                                                                                                                                                                                                                                                                                                                                                                                                                                                                                                              |
| 2952 | c97464_g1_i1_len_316_path_1_0_315_2      | 8  | zinc finger protein 420-like                                  | 105 | 9.51E-18  | 62.40% | 0.106 | IPR015880 (SMART); IPR013087 (G3DSA:3.30.160.GENE3D); IPR013087 (G3DSA:3.30.160.GENE3D); PF13465 (PFAM); IPR013087 (G3DSA:3.30.160.GENE3D); PTHR24409 (PANTHER); PTHR24409:SF14 (PANTHER); IPR007087 (PROSITE_PATTERNS); IPR007087 (PROSITE_PATTERNS); IPR007087 (PROSITE_PATTERNS); IPR007087 (PROSITE_PATTERNS); IPR007087 (PROSITE_PROFILES); IPR007087 (PROSITE_PROFILES); SSF57667 (SUPERFAMILY); SSF57667 (SUPERFAMILY)                                                                                                                                                                                                                                                                                                                               |
| 2953 | c97540_g1_i1_len_1697_path_1_0_1696_5    | 79 | zinc finger protein 28 homolog                                | 565 | 1.46E-50  | 53.00% | 0.099 | IPR015880 (SMART); IPR007087 (PFAM); IPR013087 (G3DSA:3.30.160.GENE3D); IPR013087 (G3DSA:3.30.160.GENE3D); IPR013087 (G3DSA:3.30.160.GENE3D); PF12874 (PFAM); PF13465 (PFAM); PF13894 (PFAM); PTHR24409 (PANTHER); IPR007087 (PROSITE_PATTERNS); IPR007087 (PROSITE_PROFILES); SSF57667 (SUPERFAMILY); SSF57667 (SUPERFAMILY); SSF57667 (SUPERFAMILY) |
| 2954 | c97595_g1_i1_len_263_path_241_0_262_3    | 4  | partial                                                       | 88  | 1.85E-49  | 95.20% | 0.109 | IPR011614 (G3DSA:2.40.180.GENE3D); IPR011614 (PFAM); IPR018028 (PANTHER); IPR018028 (PROSITE_PROFILES); IPR020835 (SUPERFAMILY)                                                                                                                                                                                                                                                                                                                                                                                                                                                                                                                                                                                                                             |
| 2955 | c97642_g1_i1_len_438_path_416_0_437_2    | 20 | mam and ldl-receptor class a domain-containing protein 1-like | 146 | 8.22E-41  | 60.10% | 0.113 | IPR000998 (SMART); IPR000998 (PFAM); PTHR23282 (PANTHER); IPR000998 (PROSITE_PROFILES); IPR013320 (SUPERFAMILY)                                                                                                                                                                                                                                                                                                                                                                                                                                                                                                                                                                                                                                             |
| 2956 | c97650_g1_i1_len_716_path_694_0_715_2    | 32 | retinol dehydrogenase 13-like                                 | 238 | 6.04E-99  | 76.20% | 0.114 | IPR002347 (PRINTS); IPR002198 (PRINTS); IPR002198 (PFAM); IPR016040 (G3DSA:3.40.50.GENE3D); PTHR24320:SF55 (PANTHER); PTHR24320 (PANTHER); SSF51735 (SUPERFAMILY)                                                                                                                                                                                                                                                                                                                                                                                                                                                                                                                                                                                           |
| 2957 | c97706_g1_i1_len_1197_path_1175_0_1196_4 | 50 | peptidyl-prolyl cis-trans isomerase d                         | 399 | 7.08E-150 | 73.70% | 0.095 | Coil (COILS); IPR002130 (PRINTS); IPR019734 (SMART); IPR002130 (PFAM); IPR023114 (G3DSA:1.10.150.GENE3D); PF13414 (PFAM); IPR029000 (G3DSA:2.40.100.GENE3D); IPR011990 (G3DSA:1.25.40.GENE3D); IPR024936 (PANTHER); PTHR11071:SF78 (PANTHER); IPR020892 (PROSITE_PATTERNS); IPR013026 (PROSITE_PROFILES); IPR019734 (PROSITE_PROFILES); IPR002130 (PROSITE_PROFILES); IPR019734 (PROSITE_PROFILES); IPR029000 (SUPERFAMILY); SSF48452 (SUPERFAMILY)                                                                                                                                                                                                                                                                                                         |
| 2958 | c97747_g1_i1_len_384_path_362_0_383_3    | 6  | low-density lipoprotein                                       | 128 | 4.02E-59  | 77.20% | 0.117 | IPR000033 (SMART); IPR011042 (G3DSA:2.120.10.GENE3D); IPR000033 (PFAM); PTHR10529 (PANTHER); PTHR10529:SF222 (PANTHER); SSF63825 (SUPERFAMILY)                                                                                                                                                                                                                                                                                                                                                                                                                                                                                                                                                                                                              |
| 2959 | c97768_g1_i1_len_823_path_809_0_822_4    | 35 | pdz domain-containing protein 11                              | 274 | 1.74E-51  | 76.90% | 0.119 | IPR001478 (SMART); IPR001478 (PFAM); IPR001478 (G3DSA:2.30.42.GENE3D); PTHR14063 (PANTHER); TRANSMEMBRANE (PHOBIOUS); NON_CYTOPLASMIC_DOMAIN (PHOBIOUS); CYTOPLASMIC_DOMAIN (PHOBIOUS); IPR001478 (PROSITE_PROFILES); IPR001478 (SUPERFAMILY)                                                                                                                                                                                                                                                                                                                                                                                                                                                                                                               |
| 2960 | c97797_g1_i1_len_692_path_1_0_691_2      | 27 | hemagglutinin                                                 | 230 | 1.29E-43  | 59.50% | 0.109 | IPR023612 (PRINTS); G3DSA:1.10.390.10 (GENE3D); IPR013856 (PFAM); IPR013856 (G3DSA:3.10.170.GENE3D); SSF55486 (SUPERFAMILY)                                                                                                                                                                                                                                                                                                                                                                                                                                                                                                                                                                                                                                 |
| 2961 | c97978_g1_i1_len_266_path_1_0_265_5      | 3  | guanine nucleotide-binding protein subunit beta-5             | 88  | 5.28E-43  | 92.30% | 0.124 | IPR001680 (SMART); IPR001680 (PFAM); IPR015943 (G3DSA:2.130.10.GENE3D); PTHR19850:SF12 (PANTHER); IPR016346 (PANTHER); IPR019775 (PROSITE_PATTERNS); IPR001680 (PROSITE_PROFILES); IPR017986 (PROSITE_PROFILES); IPR001680 (PROSITE_PROFILES); IPR017986 (SUPERFAMILY)                                                                                                                                                                                                                                                                                                                                                                                                                                                                                      |
| 2962 | c98066_g1_i1_len_450_path_1_0_449_1      | 6  | contactin                                                     | 150 | 2.60E-24  | 54.60% | 0.124 | IPR003598 (SMART); PF13927 (PFAM); IPR013783 (G3DSA:2.60.40.GENE3D); IPR007110 (PROSITE_PROFILES); SSF48726 (SUPERFAMILY)                                                                                                                                                                                                                                                                                                                                                                                                                                                                                                                                                                                                                                   |

|      |                                       |     |                                                                               |     |           |        |       |                                                                                                                                                                                                                                                                                                                                                                                                                                                                                  |
|------|---------------------------------------|-----|-------------------------------------------------------------------------------|-----|-----------|--------|-------|----------------------------------------------------------------------------------------------------------------------------------------------------------------------------------------------------------------------------------------------------------------------------------------------------------------------------------------------------------------------------------------------------------------------------------------------------------------------------------|
| 2963 | c98082_g1_i1_len_364_path_1_0_363_0   | 5   | xanthine dehydrogenase oxidase isoform x2                                     | 122 | 1.36E-37  | 73.60% | 0.123 | G3DSA:3.30.390.50 (GENE3D); IPR002346 (PFAM); IPR016169 (G3DSA:3.30.465.GENE3D); PTHR11908 (PANTHER); PTHR11908:SF32 (PANTHER); IPR016166 (PROSITE_PROFILES); IPR016166 (SUPERFAMILY)                                                                                                                                                                                                                                                                                            |
| 2964 | c98153_g1_i1_len_624_path_602_0_623_0 | 21  | aminopeptidase n                                                              | 208 | 1.15E-71  | 73.10% | 0.116 | IPR024571 (PFAM); IPR001930 (PANTHER); PTHR11533:SF148 (PANTHER) IPR015880 (SMART); IPR013087 (G3DSA:3.30.160.GENE3D); PF13465 (PFAM); IPR013087 (G3DSA:3.30.160.GENE3D); PTHR23223 (PANTHER); PTHR23223:SF148 (PANTHER); IPR007087 (PROSITE_PATTERNS); IPR007087 (PROSITE_PROFILES); IPR007087 (PROSITE_PROFILES); SSF57667 (SUPERFAMILY)                                                                                                                                       |
| 2965 | c98159_g1_i1_len_761_path_739_0_760_0 | 21  | krueppel-like factor 3 isoform x1                                             | 254 | 4.16E-58  | 70.00% | 0.105 | IPR000782 (PFAM); IPR000782 (G3DSA:2.30.180.GENE3D); PTHR10900 (PANTHER); PTHR10900:SF73 (PANTHER); IPR000782 (PROSITE_PATTERNS); IPR000782 (PROSITE_PROFILES); IPR000782 (SUPERFAMILY)                                                                                                                                                                                                                                                                                          |
| 2966 | c98208_g1_i1_len_469_path_447_0_468_0 | 16  | transforming growth factor-beta-induced protein ig-h3-like                    | 157 | 1.21E-56  | 66.60% | 0.121 | IPR003959 (PFAM); IPR027417 (G3DSA:3.40.50.GENE3D); PTHR23074 (PANTHER); PTHR23074:SF74 (PANTHER); IPR027417 (SUPERFAMILY)                                                                                                                                                                                                                                                                                                                                                       |
| 2967 | c98259_g1_i1_len_258_path_1_0_257_2   | 7   | vacuolar protein sorting-associated protein 4-like                            | 86  | 2.48E-41  | 85.50% | 0.12  | IPR003598 (SMART); IPR013098 (PFAM); IPR013783 (G3DSA:2.60.40.GENE3D); PF13895 (PFAM); IPR013783 (G3DSA:2.60.40.GENE3D); PTHR11640 (PANTHER); PTHR11640:SF52 (PANTHER); IPR007110 (PROSITE_PROFILES); SSF48726 (SUPERFAMILY); SSF48726 (SUPERFAMILY)                                                                                                                                                                                                                             |
| 2968 | c98280_g1_i1_len_375_path_353_0_374_2 | 6   | irregular chiasm c-roughest protein isoform x1                                | 125 | 7.02E-39  | 66.90% | 0.15  | IPR001478 (SMART); IPR001478 (G3DSA:2.30.42.GENE3D); IPR001478 (G3DSA:2.30.42.GENE3D); IPR001478 (G3DSA:2.30.42.GENE3D); IPR001478 (PANTHER); PTHR10316 (PANTHER); PTHR10316:SF40 (PANTHER); IPR001478 (PROSITE_PROFILES); IPR001478 (PROSITE_PROFILES); IPR001478 (PROSITE_PROFILES); IPR001478 (SUPERFAMILY); IPR001478 (SUPERFAMILY)                                                                                                                                          |
| 2969 | c98299_g1_i1_len_1998_path_1_0_1997_3 | 119 | membrane-associated guanylate ww and pdz domain-containing protein 2          | 666 | 5.93E-166 | 77.70% | 0.1   | IPR000742 (SMART); G3DSA:2.10.25.10 (GENE3D); IPR013032 (PFAM); IPR000436 (PFAM); G3DSA:2.10.25.10 (GENE3D); G3DSA:2.10.70.10 (GENE3D); PTHR19325:SF43 (PANTHER); PTHR19325 (PANTHER); IPR013032 (PROSITE_PATTERNS); IPR013032 (PROSITE_PATTERNS); IPR013032 (PROSITE_PATTERNS); IPR000436 (PROSITE_PROFILES); IPR000742 (PROSITE_PROFILES); IPR000742 (PROSITE_PROFILES); IPR000742 (PROSITE_PROFILES); SSF57196 (SUPERFAMILY); IPR000436 (SUPERFAMILY); SSF57196 (SUPERFAMILY) |
| 2970 | c98338_g1_i1_len_525_path_503_0_524_4 | 19  | von willebrand factor type egf and pentraxin domain-containing protein 1-like | 168 | 1.08E-38  | 58.40% | 0.106 | IPR002401 (PRINTS); IPR001128 (PRINTS); IPR001128 (PFAM); IPR001128 (G3DSA:1.10.630.GENE3D); PTHR24300 (PANTHER); NON_CYTOPLASMIC_DOMAIN (PHOBIUS); CYTOPLASMIC_DOMAIN (PHOBIUS); TRANSMEMBRANE (PHOBIUS); IPR001128 (SUPERFAMILY); TMhelix (TMHMM)                                                                                                                                                                                                                              |
| 2971 | c98459_g1_i1_len_641_path_1_0_640_0   | 10  | cytochrome p450 2u1                                                           | 214 | 6.98E-46  | 63.20% | 0.117 | IPR002172 (PRINTS); IPR002172 (SMART); IPR002172 (PFAM); G3DSA:4.10.1220.10 (GENE3D); IPR002172 (G3DSA:4.10.400.GENE3D); G3DSA:2.10.25.10 (GENE3D); PTHR10529:SF222 (PANTHER); PTHR10529 (PANTHER); IPR023415 (PROSITE_PATTERNS); IPR023415 (PROSITE_PATTERNS); IPR002172 (PROSITE_PROFILES); IPR002172 (PROSITE_PROFILES); IPR002172 (SUPERFAMILY); SSF57196 (SUPERFAMILY)                                                                                                      |
| 2972 | c98506_g1_i1_len_389_path_1_0_388_4   | 7   | low-density lipoprotein                                                       | 130 | 1.38E-33  | 59.00% | 0.107 | IPR002172 (SUPERFAMILY)                                                                                                                                                                                                                                                                                                                                                                                                                                                          |
| 2973 | c98525_g1_i1_len_274_path_252_0_273_0 | 4   | neurexin-4 isoform x3                                                         | 92  | 5.74E-31  | 76.40% | 0.107 | IPR013320 (G3DSA:2.60.120.GENE3D); IPR013320 (SUPERFAMILY)                                                                                                                                                                                                                                                                                                                                                                                                                       |
| 2974 | c98527_g1_i1_len_324_path_1_0_323_1   | 6   | isoform b                                                                     | 108 | 2.08E-45  | 85.00% | 0.114 | PR00010 (PRINTS); IPR001881 (SMART); IPR000742 (SMART); G3DSA:2.10.25.10 (GENE3D); IPR000742 (PFAM); PTHR24049:SF6 (PANTHER); PTHR24049 (PANTHER); IPR013032 (PROSITE_PATTERNS); IPR013032 (PROSITE_PATTERNS); IPR013032 (PROSITE_PATTERNS); IPR000152 (PROSITE_PATTERNS); IPR000742 (PROSITE_PROFILES); IPR000742 (PROSITE_PROFILES); IPR000742 (PROSITE_PROFILES); SSF57196 (SUPERFAMILY); SSF57196 (SUPERFAMILY)                                                              |
| 2975 | c98533_g1_i1_len_925_path_1_0_924_4   | 110 | ---NA---                                                                      | 308 |           |        | 0.128 | CYTOPLASMIC_DOMAIN (PHOBIUS); TRANSMEMBRANE (PHOBIUS); NON_CYTOPLASMIC_DOMAIN (PHOBIUS)                                                                                                                                                                                                                                                                                                                                                                                          |
| 2976 | c98555_g1_i1_len_424_path_402_0_423_5 | 9   | thioredoxin 2                                                                 | 141 | 6.68E-33  | 71.20% | 0.114 | PR00421 (PRINTS); IPR012336 (G3DSA:3.40.30.GENE3D); IPR013766 (PFAM); PTHR10438:SF235 (PANTHER); IPR005746 (PANTHER); IPR012336 (PROSITE_PROFILES); IPR012336 (SUPERFAMILY)                                                                                                                                                                                                                                                                                                      |
| 2977 | c98592_g1_i1_len_236_path_1_0_235_2   | 3   | moxd1-like protein 1                                                          | 78  | 2.21E-12  | 65.10% | 0.108 | IPR000323 (G3DSA:2.60.120.GENE3D); IPR000323 (PFAM); PTHR10157:SF23 (PANTHER); IPR000945 (PANTHER); IPR008977 (SUPERFAMILY)                                                                                                                                                                                                                                                                                                                                                      |

|      |                                          |    |                                                                      |     |          |        |         |                                                                                                                                                                                                                                                                                                                                                                                                                                                                                                                                                                                                                                             |
|------|------------------------------------------|----|----------------------------------------------------------------------|-----|----------|--------|---------|---------------------------------------------------------------------------------------------------------------------------------------------------------------------------------------------------------------------------------------------------------------------------------------------------------------------------------------------------------------------------------------------------------------------------------------------------------------------------------------------------------------------------------------------------------------------------------------------------------------------------------------------|
| 2978 | c98630_g1_i1_len_762_path_1_0_761_2      | 20 | apolipoprotein d-like                                                | 254 | 8.97E-24 | 51.40% | 0.144   | IPR003057 (PRINTS); IPR012674 (G3DSA:2.40.128.GENE3D); IPR000566 (PFAM); PTHR10612 (PANTHER); IPR022272 (PROSITE_PATTERNS); NON_CYTOPLASMIC_DOMAIN (PHOBIUS); CYTOPLASMIC_DOMAIN (PHOBIUS); TRANSMEMBRANE (PHOBIUS); IPR011038 (SUPERFAMILY); TMhelix (TMHMM)                                                                                                                                                                                                                                                                                                                                                                               |
| 2979 | c98644_g1_i1_len_1598_path_1576_0_1597_5 | 56 | low-density lipoprotein receptor class a domain-containing protein 3 | 532 | 5.59E-80 | 51.70% | 0.853Y  | IPR003599 (SMART); IPR002172 (SMART); IPR002172 (G3DSA:4.10.400.GENE3D); IPR013783 (G3DSA:2.60.40.GENE3D); IPR002172 (PFAM); IPR013151 (PFAM); IPR023415 (PROSITE_PATTERNS); SIGNAL_PEPTIDE_N_REGION (PHOBIUS); CYTOPLASMIC_DOMAIN (PHOBIUS); SIGNAL_PEPTIDE_H_REGION (PHOBIUS); SIGNAL_PEPTIDE_C_REGION (PHOBIUS); TRANSMEMBRANE (PHOBIUS); NON_CYTOPLASMIC_DOMAIN (PHOBIUS); SIGNAL_PEPTIDE (PHOBIUS); IPR002172 (PROSITE_PROFILES); IPR007110 (PROSITE_PROFILES); SignalP-noTM (SIGNALP_EUK); SignalP-TM (SIGNALP_GRAM_POSITIVE); SignalP-noTM (SIGNALP_GRAM_NEGATIVE); SSF48726 (SUPERFAMILY); IPR002172 (SUPERFAMILY); TMhelix (TMHMM) |
| 2980 | c98660_g1_i1_len_904_path_1_0_903_3      | 86 | ankyrin repeat domain-containing protein 49-like                     | 302 | 5.34E-62 | 65.80% | 0.122   | IPR002110 (PRINTS); IPR002110 (SMART); IPR020683 (PFAM); IPR020683 (G3DSA:1.25.40.GENE3D); PTHR24144 (PANTHER); IPR002110 (PROSITE_PROFILES); IPR020683 (PROSITE_PROFILES); IPR002110 (PROSITE_PROFILES); IPR002110 (PROSITE_PROFILES); IPR020683 (SUPERFAMILY)                                                                                                                                                                                                                                                                                                                                                                             |
| 2981 | c98682_g1_i1_len_257_path_235_0_256_1    | 9  | hypothetical protein                                                 | 86  | 2.55E-06 | 51.00% | 0.104   | no IPS match                                                                                                                                                                                                                                                                                                                                                                                                                                                                                                                                                                                                                                |
| 2982 | c98682_g1_i1_len_257_path_235_0_256_5    | 9  | collagen alpha-1 chain isoform x1                                    | 85  | 2.28E-07 | 65.40% | 0.751 Y | IPR008160 (PFAM); PTHR24023 (PANTHER); PTHR24023:SF372 (PANTHER); SIGNAL_PEPTIDE_H_REGION (PHOBIUS); NON_CYTOPLASMIC_DOMAIN (PHOBIUS); SIGNAL_PEPTIDE_N_REGION (PHOBIUS); SIGNAL_PEPTIDE_C_REGION (PHOBIUS); SIGNAL_PEPTIDE (PHOBIUS); SignalP-TM (SIGNALP_GRAM_POSITIVE); SignalP-noTM (SIGNALP_EUK)                                                                                                                                                                                                                                                                                                                                       |
| 2983 | c98691_g1_i1_len_374_path_352_0_373_4    | 6  | zinc finger protein 345 isoform x3                                   | 125 | 2.16E-13 | 56.00% | 0.101   | IPR015880 (SMART); IPR013087 (G3DSA:3.30.160.GENE3D); IPR007087 (PFAM); PF13894 (PFAM); IPR013087 (G3DSA:3.30.160.GENE3D); PTHR24409 (PANTHER); IPR007087 (PROSITE_PATTERNS); IPR007087 (PROSITE_PATTERNS); IPR007087 (PROSITE_PROFILES); IPR007087 (PROSITE_PROFILES); SSF57667 (SUPERFAMILY)                                                                                                                                                                                                                                                                                                                                              |
| 2984 | c98731_g1_i1_len_704_path_1_0_703_3      | 20 | aldehyde dehydrogenase family 2 member mitochondrial-like            | 235 | 1.47E-94 | 70.90% | 0.107   | IPR015590 (PFAM); IPR016163 (G3DSA:3.40.309.GENE3D); IPR015657 (PTHR11699:PANTHER); PTHR11699 (PANTHER); IPR016161 (SUPERFAMILY)                                                                                                                                                                                                                                                                                                                                                                                                                                                                                                            |
| 2985 | c98857_g1_i1_len_394_path_1_0_393_1      | 4  | zinc finger protein 84-like                                          | 131 | 1.64E-11 | 53.80% | 0.104   | IPR015880 (SMART); IPR013087 (G3DSA:3.30.160.GENE3D); PTHR24409 (PANTHER); PTHR24409 (PANTHER); IPR007087 (PROSITE_PATTERNS); IPR007087 (PROSITE_PATTERNS); IPR007087 (PROSITE_PROFILES); IPR007087 (PROSITE_PROFILES); SSF57667 (SUPERFAMILY)                                                                                                                                                                                                                                                                                                                                                                                              |
| 2986 | c99099_g1_i1_len_297_path_1_0_296_0      | 6  | xanthine dehydrogenase                                               | 99  | 3.25E-39 | 83.70% | 0.11    | IPR008274 (G3DSA:3.30.365.GENE3D); IPR008274 (PFAM); PTHR11908:SF32 (PANTHER); PTHR11908 (PANTHER); IPR008274 (SUPERFAMILY)                                                                                                                                                                                                                                                                                                                                                                                                                                                                                                                 |
| 2987 | c99120_g1_i1_len_665_path_49_0_664_5     | 17 | upf0764 protein c16orf89 homolog                                     | 221 | 1.44E-27 | 50.20% | 0.135   | no IPS match                                                                                                                                                                                                                                                                                                                                                                                                                                                                                                                                                                                                                                |
| 2988 | c99159_g1_i1_len_649_path_1_0_648_3      | 14 | tyrosine-protein phosphatase non-receptor type 23                    | 217 | 1.88E-95 | 69.40% | 0.136   | IPR000242 (PRINTS); IPR000242 (SMART); IPR003595 (SMART); IPR000242 (PFAM); IPR029021 (G3DSA:3.90.190.GENE3D); PTHR19134 (PANTHER); IPR028770 (PTHR19134:PANTHER); IPR016130 (PROSITE_PATTERNS); IPR000387 (PROSITE_PROFILES); IPR000242 (PROSITE_PROFILES); IPR029021 (SUPERFAMILY)                                                                                                                                                                                                                                                                                                                                                        |
| 2989 | c99186_g1_i1_len_1275_path_1253_0_1274_1 | 35 | ankyrin repeat family a protein 2-like                               | 425 | 3.78E-73 | 68.30% | 0.199   | IPR002110 (SMART); IPR002110 (PFAM); IPR020683 (G3DSA:1.25.40.GENE3D); IPR020683 (PFAM); PTHR24124:SF6 (PANTHER); PTHR24124 (PANTHER); IPR002110 (PROSITE_PROFILES); IPR002110 (PROSITE_PROFILES); IPR002110 (PROSITE_PROFILES); IPR020683 (PROSITE_PROFILES); IPR020683 (SUPERFAMILY)                                                                                                                                                                                                                                                                                                                                                      |
| 2990 | c99239_g1_i1_len_577_path_555_0_576_0    | 12 | protocadherin fat 2                                                  | 193 | 1.14E-78 | 78.90% | 0.103   | IPR002126 (PRINTS); IPR002126 (SMART); IPR002126 (G3DSA:2.60.40.GENE3D); IPR002126 (PFAM); PTHR24026:SF40 (PANTHER); PTHR24026 (PANTHER); IPR020894 (PROSITE_PATTERNS); IPR002126 (PROSITE_PROFILES); IPR002126 (PROSITE_PROFILES); IPR015919 (SUPERFAMILY); IPR015919 (SUPERFAMILY)                                                                                                                                                                                                                                                                                                                                                        |
| 2991 | c99244_g1_i1_len_866_path_1_0_865_4      | 33 | lysosomal alpha-glucosidase-like                                     | 289 | 1.41E-62 | 66.10% | 0.162   | IPR000322 (PFAM); PTHR22762:SF7 (PANTHER); PTHR22762 (PANTHER); TRANSMEMBRANE (PHOBIUS); CYTOPLASMIC_DOMAIN (PHOBIUS); CYTOPLASMIC_DOMAIN (PHOBIUS); TRANSMEMBRANE (PHOBIUS); NON_CYTOPLASMIC_DOMAIN (PHOBIUS); SSF51011 (SUPERFAMILY); TMhelix (TMHMM); TMhelix (TMHMM)                                                                                                                                                                                                                                                                                                                                                                    |

[illegible]



Supplementary Table 8: Venom gland tissue transcriptome (Trinity contigs that match against secreted proteins [UniProtSL0243])

| Nr. | Contig name                                                    | Read Numbers | Blast result (evalue=10 <sup>-5</sup> , BlastP, Nr database)                                                                                                        | Seq. length | min. evalue | mean similarity | SignalP | InterProScan                                                                                                                                                                                                                                                                                                                                                                                                 |
|-----|----------------------------------------------------------------|--------------|---------------------------------------------------------------------------------------------------------------------------------------------------------------------|-------------|-------------|-----------------|---------|--------------------------------------------------------------------------------------------------------------------------------------------------------------------------------------------------------------------------------------------------------------------------------------------------------------------------------------------------------------------------------------------------------------|
| 1   | c100119_g1_i1_len_324_path_302_0_323_3                         | 2            | zinc finger protein 449 isoform x2                                                                                                                                  | 108         | 7.51E-15    | 69.10%          | 0.107   | IPR015880 (SMART); IPR013087 (G3DSA:3.30.160.GENE3D); PF13465 (PFAM); PTHR24409 (PANTHER); IPR007087 (PROSITE_PATTERNS); IPR007087 (PROSITE_PATTERNS); IPR007087 (PROSITE_PROFILES); IPR007087 (PROSITE_PROFILES); SSF57667 (SUPERFAMILY)                                                                                                                                                                    |
| 2   | c10019_g1_i1_len_1900_path_1_0_1899_4                          | 63           | spermine oxidase-like                                                                                                                                               | 629         | 1.03E-131   | 62.60%          | 0.171   | IPR001613 (PRINTS); IPR002937 (PFAM); G3DSA:3.50.50.60 (GENE3D); PTHR10742:SF255 (PANTHER); PTHR10742 (PANTHER); CYTOPLASMIC_DOMAIN (PHOBIUS); NON_CYTOPLASMIC_DOMAIN (PHOBIUS); CYTOPLASMIC_DOMAIN (PHOBIUS); NON_CYTOPLASMIC_DOMAIN (PHOBIUS); TRANSMEMBRANE (PHOBIUS); TRANSMEMBRANE (PHOBIUS); TRANSMEMBRANE (PHOBIUS); SSF54373 (SUPERFAMILY); SSF51905 (SUPERFAMILY); TMhelix (TMHMM); TMhelix (TMHMM) |
| 3   | c100216_g1_i1_len_1066_path_1044_0_1065_0                      | 8            | lrr receptor-like serine threonine-protein kinase fls2                                                                                                              | 349         | 1.09E-140   | 69.30%          | 0.392 Y | IPR013210 (PFAM); IPR001611 (PFAM); G3DSA:3.80.10.10 (GENE3D); PTHR24420 (PANTHER); SSF52058 (SUPERFAMILY)                                                                                                                                                                                                                                                                                                   |
| 4   | c10027_g1_i1_len_1364_path_1_0_284_2835_285_390_392_391_1363_1 | 12           | cathepsin partial                                                                                                                                                   | 455         | 1.01E-117   | 81.30%          | 0.129   | IPR000668 (PRINTS); IPR000668 (SMART); IPR000668 (PFAM); G3DSA:3.90.70.10 (GENE3D); IPR013128 (PANTHER); PTHR12411:SF265 (PANTHER); IPR025661 (PROSITE_PATTERNS); IPR000169 (PROSITE_PATTERNS); IPR025660 (PROSITE_PATTERNS); SSF54001 (SUPERFAMILY)                                                                                                                                                         |
| 5   | c100538_g1_i1_len_407_path_1_0_406_0                           | 2            | adp-ribosylation factor-like protein 4a                                                                                                                             | 136         | 1.11E-69    | 88.50%          | 0.111   | IPR006689 (PRINTS); IPR024156 (SMART); IPR006689 (PFAM); IPR027417 (G3DSA:3.40.50.GENE3D); PTHR11711 (PANTHER); PTHR11711:SF121 (PANTHER); IPR024156 (PROSITE_PROFILES); IPR027417 (SUPERFAMILY)                                                                                                                                                                                                             |
| 6   | c101178_g1_i1_len_678_path_656_0_677_4                         | 9            | amine oxidase                                                                                                                                                       | 226         | 4.93E-61    | 66.90%          | 0.13    | G3DSA:1.10.405.10 (GENE3D); PF13450 (PFAM); G3DSA:3.50.50.60 (GENE3D); PTHR10742 (PANTHER); PTHR10742:SF217 (PANTHER); SSF51905 (SUPERFAMILY)                                                                                                                                                                                                                                                                |
| 7   | c10145_g1_i1_len_1333_path_1_0_1332_4                          | 65           | follistatin-a isoform x2                                                                                                                                            | 439         | 7.69E-104   | 66.80%          | 0.17    | IPR003645 (SMART); IPR002350 (SMART); G3DSA:3.30.60.30 (GENE3D); IPR002350 (PFAM); IPR002350 (PFAM); PTHR10913:SF39 (PANTHER); PTHR10913 (PANTHER); IPR002350 (PROSITE_PROFILES); IPR002350 (PROSITE_PROFILES); IPR002350 (PROSITE_PROFILES); SSF100895 (SUPERFAMILY); SSF100895 (SUPERFAMILY); SSF100895 (SUPERFAMILY)                                                                                      |
| 8   | c1016_g1_i1_len_1732_path_1_0_1731_1                           | 798          | nucleolar protein 56                                                                                                                                                | 577         | 0           | 87.50%          | 0.192   | Coil (COILS); IPR012976 (SMART); IPR002687 (PFAM); IPR012974 (PFAM); IPR012976 (PFAM); PTHR10894 (PANTHER); PTHR10894:SF0 (PANTHER); IPR002687 (PROSITE_PROFILES); SSF89124 (SUPERFAMILY)                                                                                                                                                                                                                    |
| 9   | c101999_g1_i1_len_241_path_1_0_240_3                           | 0            | ncase_drops ame: full=neutral ceramidase short=n-cdase short=ncdase ame: full=acylsphingosine deacylase ame: full=n-acylsphingosine amidohydrolase flags: precursor | 81          | 6.35E-23    | 71.30%          | 0.109   | IPR006823 (PFAM); IPR006823 (PANTHER); PTHR12670:SF1 (PANTHER)                                                                                                                                                                                                                                                                                                                                               |
| 10  | c102093_g1_i1_len_383_path_1_0_382_1                           | 4            | collagen alpha-1 chain-like                                                                                                                                         | 128         | 5.00E-58    | 86.90%          | 0.146   | IPR000885 (SMART); IPR000885 (PFAM); PTHR24023:SF444 (PANTHER); PTHR24023 (PANTHER); IPR000885 (PRODOM); IPR000885 (PROSITE_PROFILES)                                                                                                                                                                                                                                                                        |
| 11  | c103722_g1_i1_len_387_path_1_0_386_0                           | 2            | hypothetical protein DAPPUDRAFT_101895                                                                                                                              | 129         | 1.18E-07    | 68.00%          | 0.1     | IPR001881 (SMART); G3DSA:2.10.25.10 (GENE3D); IPR001881 (PFAM); IPR018097 (PROSITE_PATTERNS); SSF57196 (SUPERFAMILY)                                                                                                                                                                                                                                                                                         |
| 12  | c103735_g1_i1_len_354_path_1_0_353_0                           | 2            | leukotriene a-4 hydrolase                                                                                                                                           | 118         | 1.99E-59    | 84.90%          | 0.142   | IPR014782 (PRINTS); IPR014782 (PFAM); G3DSA:1.10.390.10 (GENE3D); IPR001930 (PANTHER); PTHR11533:SF4 (PANTHER); SSF55486 (SUPERFAMILY)                                                                                                                                                                                                                                                                       |
| 13  | c104895_g1_i1_len_224_path_202_0_223_4                         | 2            | alanine dehydrogenase                                                                                                                                               | 75          | 4.04E-41    | 98.60%          | 0.13    | IPR007698 (SMART); IPR007698 (PFAM); IPR016040 (G3DSA:3.40.50.GENE3D); PTHR10160 (PANTHER); TRANSMEMBRANE (PHOBIUS); NON_CYTOPLASMIC_DOMAIN (PHOBIUS); CYTOPLASMIC_DOMAIN (PHOBIUS); SSF51735 (SUPERFAMILY)                                                                                                                                                                                                  |
| 14  | c10512_g1_i1_len_2062_path_53_0_2061_0                         | 91           | pyrroline-5-carboxylate dehydrogenase                                                                                                                               | 682         | 0           | 80.50%          | 0.317   | IPR016162 (G3DSA:3.40.605.GENE3D); IPR005931 (TIGRFAM); IPR016163 (G3DSA:3.40.309.GENE3D); IPR015590 (PFAM); PTHR11699 (PANTHER); PTHR11699:SF18 (PANTHER); IPR016160 (PROSITE_PATTERNS); CYTOPLASMIC_DOMAIN (PHOBIUS); TRANSMEMBRANE (PHOBIUS); NON_CYTOPLASMIC_DOMAIN (PHOBIUS); IPR016161 (SUPERFAMILY); TMhelix (TMHMM)                                                                                  |

|    |                                                                     |      |                                                               |     |           |         |       |                                                                                                                                                                                                                                                                                                                                                                                                                                                                                                          |
|----|---------------------------------------------------------------------|------|---------------------------------------------------------------|-----|-----------|---------|-------|----------------------------------------------------------------------------------------------------------------------------------------------------------------------------------------------------------------------------------------------------------------------------------------------------------------------------------------------------------------------------------------------------------------------------------------------------------------------------------------------------------|
| 15 | c10659_g1_i1_len_2017_path_43_0_948_42_949_2016_2                   | 128  | puromycin-sensitive aminopeptidase                            | 666 | 6.60E-106 | 79.70%  | 0.109 | Coil (COILS); IPR024571 (PFAM); IPR001930 (PANTHER); PTHR11533:SF163 (PANTHER); CYTOPLASMIC_DOMAIN (PHOBIUS); TRANSMEMBRANE (PHOBIUS); CYTOPLASMIC_DOMAIN (PHOBIUS); NON_CYTOPLASMIC_DOMAIN (PHOBIUS); TRANSMEMBRANE (PHOBIUS); TRANSMEMBRANE (PHOBIUS); NON_CYTOPLASMIC_DOMAIN (PHOBIUS); NON_CYTOPLASMIC_DOMAIN (PHOBIUS); TMhelix (TMHMM); TMhelix (TMHMM); TMhelix (TMHMM)                                                                                                                           |
| 16 | c10692_g1_i1_len_2878_path_2856_0_288_3145_289_2877_4               | 123  | fat-like cadherin-related tumor suppressor homolog isoform x1 | 959 | 2.00E-141 | 60.00%  | 0.105 | IPR001881 (SMART); IPR000742 (SMART); G3DSA:2.10.25.10 (GENE3D); IPR001881 (PFAM); PTHR24026 (PANTHER); PTHR24026:SF39 (PANTHER); IPR018097 (PROSITE_PATTERNS); IPR000152 (PROSITE_PATTERNS); CYTOPLASMIC_DOMAIN (PHOBIUS); CYTOPLASMIC_DOMAIN (PHOBIUS); NON_CYTOPLASMIC_DOMAIN (PHOBIUS); NON_CYTOPLASMIC_DOMAIN (PHOBIUS); TRANSMEMBRANE (PHOBIUS); TRANSMEMBRANE (PHOBIUS); TRANSMEMBRANE (PHOBIUS); IPR000742 (PROSITE_PROFILES); SSF57196 (SUPERFAMILY); TMhelix (TMHMM)                           |
| 17 | c1079_g1_i1_len_212_path_103_0_36_140_37_6_0_400_61_79_183_80_211_0 | 0    | probable chitinase 3                                          | 71  | 7.67E-12  | 64.90%  | 0.106 | IPR013781 (G3DSA:3.20.20.GENE3D)                                                                                                                                                                                                                                                                                                                                                                                                                                                                         |
| 18 | c1080_g1_i1_len_1123_path_53_0_1122_2                               | 51   | n-acetylglucosamine-1-phosphotransferase subunit gamma-like   | 374 | 1.13E-71  | 60.30%  | 0.136 | Coil (COILS); IPR009011 (G3DSA:2.70.130.GENE3D); PF13015 (PFAM); PTHR12630:SF6 (PANTHER); PTHR12630 (PANTHER); IPR009011 (SUPERFAMILY)                                                                                                                                                                                                                                                                                                                                                                   |
| 19 | c10833_g1_i1_len_1502_path_55_0_1501_4                              | 140  | tl5a_tactr ame: full=techylectin-5a flags: precursor          | 501 | 4.40E-54  | 60.50%  | 0.118 | Coil (COILS); IPR002181 (SMART); IPR002181 (PFAM); IPR014715 (G3DSA:4.10.530.GENE3D); IPR014716 (G3DSA:3.90.215.GENE3D); PTHR19143 (PANTHER); IPR020837 (PROSITE_PATTERNS); IPR002181 (PROSITE_PROFILES); IPR002181 (SUPERFAMILY)                                                                                                                                                                                                                                                                        |
| 20 | c108622_g1_i1_len_161_path_1_0_160_2                                | 0    | sparc-related modular calcium-binding protein 2-like          | 53  | 1.52E-07  | 72.50%  | 0.108 | IPR000716 (SMART); IPR000716 (PFAM); IPR000716 (G3DSA:4.10.800.GENE3D); IPR000716 (PROSITE_PATTERNS); IPR000716 (PROSITE_PROFILES); IPR000716 (SUPERFAMILY)                                                                                                                                                                                                                                                                                                                                              |
| 21 | c109580_g1_i1_len_587_path_573_0_586_1                              | 6281 | anopheles stephensi ubiquitin                                 | 189 | 2.60E-85  | 97.30%  | 0.106 | IPR019956 (PRINTS); IPR000626 (SMART); IPR001975 (PFAM); IPR000626 (PFAM); G3DSA:3.10.20.90 (GENE3D); PTHR10666 (PANTHER); IPR019954 (PROSITE_PATTERNS); IPR000626 (PROSITE_PROFILES); IPR011332 (SUPERFAMILY); IPR029071 (SUPERFAMILY)                                                                                                                                                                                                                                                                  |
| 22 | c109648_g1_i1_len_1383_path_5_0_1382_2                              | 3370 | adp-ribosylation factor-like protein 8b-a                     | 455 | 6.48E-124 | 97.70%  | 0.108 | IPR006689 (PRINTS); IPR006687 (SMART); IPR024156 (SMART); IPR003579 (SMART); IPR006689 (PFAM); IPR027417 (G3DSA:3.40.50.GENE3D); IPR005225 (TIGRFAM); PTHR11711 (PANTHER); PTHR11711:SF122 (PANTHER); IPR024156 (PROSITE_PROFILES); IPR027417 (SUPERFAMILY)                                                                                                                                                                                                                                              |
| 23 | c109726_g1_i1_len_438_path_416_0_437_3                              | 3    | tryptophan permease                                           | 146 | 3.06E-38  | 100.00% | 0.106 | IPR015422 (G3DSA:3.90.1150.GENE3D); IPR018227 (PFAM); PTHR32195 (PANTHER); PTHR32195:SF11 (PANTHER); IPR013061 (PROSITE_PATTERNS); CYTOPLASMIC_DOMAIN (PHOBIUS); TRANSMEMBRANE (PHOBIUS); NON_CYTOPLASMIC_DOMAIN (PHOBIUS); TRANSMEMBRANE (PHOBIUS); CYTOPLASMIC_DOMAIN (PHOBIUS); IPR015424 (SUPERFAMILY); TMhelix (TMHMM); TMhelix (TMHMM)                                                                                                                                                             |
| 24 | c109756_g1_i1_len_753_path_1_0_752_5                                | 13   | wnt10 protein                                                 | 251 | 2.32E-41  | 80.10%  | 0.135 | IPR005817 (PFAM); IPR005817 (PANTHER); PTHR12027:SF74 (PANTHER)                                                                                                                                                                                                                                                                                                                                                                                                                                          |
| 25 | c110003_g1_i1_len_1658_path_1636_0_1657_3                           | 42   | allatostatin precursor protein                                | 553 | 1.87E-29  | 54.70%  | 0.108 | IPR010276 (PFAM); CYTOPLASMIC_DOMAIN (PHOBIUS); CYTOPLASMIC_DOMAIN (PHOBIUS); TRANSMEMBRANE (PHOBIUS); TRANSMEMBRANE (PHOBIUS); NON_CYTOPLASMIC_DOMAIN (PHOBIUS); NON_CYTOPLASMIC_DOMAIN (PHOBIUS)                                                                                                                                                                                                                                                                                                       |
| 26 | c110042_g1_i1_len_1639_path_1617_0_1638_1                           | 45   | cation channel sperm-associated protein 2                     | 546 | 1.53E-75  | 55.00%  | 0.132 | Coil (COILS); IPR027359 (G3DSA:1.20.120.GENE3D); IPR005821 (PFAM); PTHR10037 (PANTHER); IPR028747 (PTHR10037:PANTHER); NON_CYTOPLASMIC_DOMAIN (PHOBIUS); TRANSMEMBRANE (PHOBIUS); NON_CYTOPLASMIC_DOMAIN (PHOBIUS); CYTOPLASMIC_DOMAIN (PHOBIUS); TRANSMEMBRANE (PHOBIUS); CYTOPLASMIC_DOMAIN (PHOBIUS); NON_CYTOPLASMIC_DOMAIN (PHOBIUS); TRANSMEMBRANE (PHOBIUS); TRANSMEMBRANE (PHOBIUS); SSF81324 (SUPERFAMILY); TMhelix (TMHMM); TMhelix (TMHMM); TMhelix (TMHMM); TMhelix (TMHMM); TMhelix (TMHMM) |
| 27 | c110109_g1_i1_len_1218_path_1196_0_1217_3                           | 29   | hypothetical protein DAPPUDRAFT_300634                        | 406 | 9.32E-47  | 63.10%  | 0.191 | IPR001916 (PRINTS); IPR001916 (SMART); IPR001916 (PFAM); G3DSA:1.10.530.10 (GENE3D); PTHR11407 (PANTHER); IPR019799 (PROSITE_PATTERNS); TRANSMEMBRANE (PHOBIUS); NON_CYTOPLASMIC_DOMAIN (PHOBIUS); CYTOPLASMIC_DOMAIN (PHOBIUS); IPR001916 (PROSITE_PROFILES); IPR023346 (SUPERFAMILY)                                                                                                                                                                                                                   |

|    |                                           |     |                                             |     |           |        |         |                                                                                                                                                                                                                                                                                                                                                                                                                                                                                                                                                                                                                                                                                                                                                                                                                                                                                                                                 |
|----|-------------------------------------------|-----|---------------------------------------------|-----|-----------|--------|---------|---------------------------------------------------------------------------------------------------------------------------------------------------------------------------------------------------------------------------------------------------------------------------------------------------------------------------------------------------------------------------------------------------------------------------------------------------------------------------------------------------------------------------------------------------------------------------------------------------------------------------------------------------------------------------------------------------------------------------------------------------------------------------------------------------------------------------------------------------------------------------------------------------------------------------------|
| 28 | c110167_g1_i1_len_1131_path_1_0_1130_4    | 28  | tyrosine-protein phosphatase lar isoform x1 | 377 | 1.03E-27  | 74.10% | 0.112   | IPR003961 (SMART); IPR003961 (PFAM); IPR013783 (G3DSA:2.60.40.GENE3D); PTHR19134:SF199 (PANTHER); PTHR19134 (PANTHER); CYTOPLASMIC_DOMAIN (PHOBIUS); TRANSMEMBRANE (PHOBIUS); NON_CYTOPLASMIC_DOMAIN (PHOBIUS); CYTOPLASMIC_DOMAIN (PHOBIUS); TRANSMEMBRANE (PHOBIUS); NON_CYTOPLASMIC_DOMAIN (PHOBIUS); TRANSMEMBRANE (PHOBIUS); IPR003961 (PROSITE_PROFILES); IPR003961 (SUPERFAMILY); TMhelix (TMHMM); TMhelix (TMHMM); TMhelix (TMHMM)                                                                                                                                                                                                                                                                                                                                                                                                                                                                                      |
| 29 | c110212_g1_i1_len_2727_path_20_0_2726_2   | 117 | fimbrial family protein                     | 909 | 3.82E-120 | 99.50% | 0.451 Y | IPR000259 (G3DSA:2.60.40.GENE3D); IPR000259 (PFAM); SIGNAL_PEPTIDE_N_REGION (PHOBIUS); SIGNAL_PEPTIDE_H_REGION (PHOBIUS); SIGNAL_PEPTIDE (PHOBIUS); NON_CYTOPLASMIC_DOMAIN (PHOBIUS); SIGNAL_PEPTIDE_C_REGION (PHOBIUS); SignalP-noTM (SIGNALP_EUK); IPR008966 (SUPERFAMILY)                                                                                                                                                                                                                                                                                                                                                                                                                                                                                                                                                                                                                                                    |
| 30 | c110231_g1_i1_len_293_path_1_0_292_3      | 1   | exocyst complex component 6                 | 98  | 1.21E-44  | 85.40% | 0.155   | IPR007225 (PANTHER)                                                                                                                                                                                                                                                                                                                                                                                                                                                                                                                                                                                                                                                                                                                                                                                                                                                                                                             |
| 31 | c110269_g1_i1_len_2468_path_1_0_2467_4    | 170 | mitogen-activated protein kinase 15-like    | 817 | 0         | 73.00% | 0.177   | IPR000719 (PFAM); G3DSA:3.30.200.20 (GENE3D); G3DSA:1.10.510.10 (GENE3D); PTHR24055:SF79 (PANTHER); PTHR24055 (PANTHER); IPR003527 (PROSITE_PATTERNS); IPR017441 (PROSITE_PATTERNS); TRANSMEMBRANE (PHOBIUS); CYTOPLASMIC_DOMAIN (PHOBIUS); NON_CYTOPLASMIC_DOMAIN (PHOBIUS); TRANSMEMBRANE (PHOBIUS); CYTOPLASMIC_DOMAIN (PHOBIUS); TRANSMEMBRANE (PHOBIUS); NON_CYTOPLASMIC_DOMAIN (PHOBIUS); IPR000719 (PROSITE_PROFILES); IPR011009 (SUPERFAMILY); TMhelix (TMHMM); TMhelix (TMHMM)                                                                                                                                                                                                                                                                                                                                                                                                                                         |
| 32 | c110337_g1_i1_len_1283_path_1261_0_1282_0 | 28  | dentin sialophosphoprotein isoform x1       | 428 | 1.09E-119 | 68.70% | 0.107   | IPR015880 (SMART); IPR013087 (G3DSA:3.30.160.GENE3D); PF13465 (PFAM); IPR013087 (G3DSA:3.30.160.GENE3D); IPR013087 (G3DSA:3.30.160.GENE3D); PTHR24409 (PANTHER); IPR007087 (PROSITE_PATTERNS); NON_CYTOPLASMIC_DOMAIN (PHOBIUS); CYTOPLASMIC_DOMAIN (PHOBIUS); TRANSMEMBRANE (PHOBIUS); IPR007087 (PROSITE_PROFILES); SSF57667 (SUPERFAMILY); SSF57667 (SUPERFAMILY); SSF57667 (SUPERFAMILY); SSF57667 (SUPERFAMILY); SSF57667 (SUPERFAMILY); TMhelix (TMHMM) |
| 33 | c110350_g1_i1_len_496_path_1_0_495_1      | 4   | venom serine protease 34-like               | 160 | 1.47E-13  | 53.80% | 0.154   | IPR001254 (PFAM); G3DSA:2.40.10.10 (GENE3D); PTHR24260 (PANTHER); IPR018114 (PROSITE_PATTERNS); IPR001254 (PROSITE_PROFILES); IPR009003 (SUPERFAMILY)                                                                                                                                                                                                                                                                                                                                                                                                                                                                                                                                                                                                                                                                                                                                                                           |
| 34 | c110372_g1_i1_len_544_path_1_0_543_2      | 4   | n-acetylmuramoyl-l-alanine amidase partial  | 181 | 1.69E-99  | 99.90% | 0.102   | IPR002508 (SMART); IPR003594 (G3DSA:3.30.565.GENE3D); IPR002508 (G3DSA:3.40.630.GENE3D); IPR002508 (PFAM); PTHR30404 (PANTHER); PTHR30404:SF0 (PANTHER); SSF53187 (SUPERFAMILY)                                                                                                                                                                                                                                                                                                                                                                                                                                                                                                                                                                                                                                                                                                                                                 |
| 35 | c110397_g1_i1_len_1015_path_1_0_1014_3    | 23  | c-binding                                   | 339 | 4.06E-08  | 57.20% | 0.103   | IPR001846 (PFAM); PTHR11339 (PANTHER); CYTOPLASMIC_DOMAIN (PHOBIUS); TRANSMEMBRANE (PHOBIUS); NON_CYTOPLASMIC_DOMAIN (PHOBIUS); TRANSMEMBRANE (PHOBIUS); NON_CYTOPLASMIC_DOMAIN (PHOBIUS); TRANSMEMBRANE (PHOBIUS); CYTOPLASMIC_DOMAIN (PHOBIUS); IPR001846 (PROSITE_PROFILES)                                                                                                                                                                                                                                                                                                                                                                                                                                                                                                                                                                                                                                                  |

|    |                                           |     |                                                       |     |           |        |       |                                                                                                                                                                                                                                                                                                                                                                                                                                                                                                                                                                                                                                                                                                                                                          |
|----|-------------------------------------------|-----|-------------------------------------------------------|-----|-----------|--------|-------|----------------------------------------------------------------------------------------------------------------------------------------------------------------------------------------------------------------------------------------------------------------------------------------------------------------------------------------------------------------------------------------------------------------------------------------------------------------------------------------------------------------------------------------------------------------------------------------------------------------------------------------------------------------------------------------------------------------------------------------------------------|
| 36 | c110402_g1_i1_len_2389_path_2367_0_2388_0 | 76  | guanine nucleotide-binding protein g g subunit beta-1 | 791 | 0         | 97.70% | 0.13  | Coil (COILS); IPR020472 (PRINTS); IPR001632 (PRINTS); IPR001680 (SMART); IPR015943 (G3DSA:2.130.10.GENE3D); IPR001680 (PFAM); IPR016346 (PANTHER); IPR019775 (PROSITE_PATTERNS); IPR019775 (PROSITE_PATTERNS); IPR019775 (PROSITE_PATTERNS); IPR019775 (PROSITE_PATTERNS); NON_CYTOPLASMIC_DOMAIN (PHOBIUS); CYTOPLASMIC_DOMAIN (PHOBIUS); TRANSMEMBRANE (PHOBIUS); CYTOPLASMIC_DOMAIN (PHOBIUS); NON_CYTOPLASMIC_DOMAIN (PHOBIUS); TRANSMEMBRANE (PHOBIUS); TRANSMEMBRANE (PHOBIUS); NON_CYTOPLASMIC_DOMAIN (PHOBIUS); IPR017986 (PROSITE_PROFILES); IPR001680 (PROSITE_PROFILES); IPR001680 (PROSITE_PROFILES); IPR001680 (PROSITE_PROFILES); IPR001680 (PROSITE_PROFILES); IPR017986 (SUPERFAMILY); TMhelix (TMHMM); TMhelix (TMHMM); TMhelix (TMHMM) |
| 37 | c110502_g1_i1_len_1555_path_1_0_1554_2    | 156 | lpxtg-motif cell wall anchor domain protein           | 512 | 9.50E-06  | 53.00% | 0.099 | NON_CYTOPLASMIC_DOMAIN (PHOBIUS); TRANSMEMBRANE (PHOBIUS); NON_CYTOPLASMIC_DOMAIN (PHOBIUS); TRANSMEMBRANE (PHOBIUS); CYTOPLASMIC_DOMAIN (PHOBIUS); TRANSMEMBRANE (PHOBIUS); CYTOPLASMIC_DOMAIN (PHOBIUS)                                                                                                                                                                                                                                                                                                                                                                                                                                                                                                                                                |
| 38 | c110615_g1_i1_len_894_path_1_0_893_0      | 6   | chorion peroxidase-like                               | 298 | 7.99E-100 | 69.60% | 0.117 | IPR019791 (PRINTS); IPR019791 (G3DSA:1.10.640.GENE3D); IPR019791 (PFAM); PTHR11475 (PANTHER); IPR019791 (PROSITE_PROFILES); IPR010255 (SUPERFAMILY)                                                                                                                                                                                                                                                                                                                                                                                                                                                                                                                                                                                                      |
| 39 | c110618_g1_i1_len_1064_path_1_0_1063_1    | 47  | peptidyl-prolyl cis-trans isomerase h                 | 355 | 1.96E-124 | 95.40% | 0.101 | IPR002130 (PRINTS); IPR002130 (PFAM); IPR029000 (G3DSA:2.40.100.GENE3D); IPR024936 (PANTHER); PTHR11071:SF58 (PANTHER); IPR020892 (PROSITE_PATTERNS); TRANSMEMBRANE (PHOBIUS); NON_CYTOPLASMIC_DOMAIN (PHOBIUS); NON_CYTOPLASMIC_DOMAIN (PHOBIUS); CYTOPLASMIC_DOMAIN (PHOBIUS); TRANSMEMBRANE (PHOBIUS); TRANSMEMBRANE (PHOBIUS); CYTOPLASMIC_DOMAIN (PHOBIUS); TRANSMEMBRANE (PHOBIUS); IPR002130 (PROSITE_PROFILES); IPR029000 (SUPERFAMILY); TMhelix (TMHMM); TMhelix (TMHMM); TMhelix (TMHMM)                                                                                                                                                                                                                                                       |
| 40 | c110641_g1_i1_len_1404_path_1_0_1403_3    | 27  | bone morphogenetic protein partial                    | 468 | 4.92E-34  | 67.30% | 0.103 | IPR001839 (SMART); IPR029034 (G3DSA:2.10.90.GENE3D); IPR001839 (PFAM); PTHR11848:SF131 (PANTHER); IPR015615 (PANTHER); IPR017948 (PROSITE_PATTERNS); CYTOPLASMIC_DOMAIN (PHOBIUS); NON_CYTOPLASMIC_DOMAIN (PHOBIUS); TRANSMEMBRANE (PHOBIUS); IPR001839 (PROSITE_PROFILES); IPR029034 (SUPERFAMILY); TMhelix (TMHMM)                                                                                                                                                                                                                                                                                                                                                                                                                                     |
| 41 | c110643_g1_i1_len_2255_path_1_0_2254_0    | 120 | glycoside catalytic core                              | 752 | 8.81E-94  | 54.00% | 0.16  | Coil (COILS); IPR001547 (PFAM); IPR013781 (G3DSA:3.20.20.GENE3D); PTHR31308 (PANTHER); TRANSMEMBRANE (PHOBIUS); CYTOPLASMIC_DOMAIN (PHOBIUS); TRANSMEMBRANE (PHOBIUS); TRANSMEMBRANE (PHOBIUS); CYTOPLASMIC_DOMAIN (PHOBIUS); NON_CYTOPLASMIC_DOMAIN (PHOBIUS); NON_CYTOPLASMIC_DOMAIN (PHOBIUS); IPR017853 (SUPERFAMILY)                                                                                                                                                                                                                                                                                                                                                                                                                                |
| 42 | c110660_g1_i1_len_959_path_46_0_958_1     | 52  | fibroblast growth factor receptor partial             | 314 | 7.01E-16  | 67.10% | 0.101 | IPR013783 (G3DSA:2.60.40.GENE3D); PTHR24416 (PANTHER); IPR028174 (PTHR24416:PANTHER); SSF48726 (SUPERFAMILY)                                                                                                                                                                                                                                                                                                                                                                                                                                                                                                                                                                                                                                             |
| 43 | c110704_g1_i1_len_1330_path_1_0_1329_1    | 47  | prophenol oxidase activating enzyme precursor         | 438 | 3.30E-48  | 52.10% | 0.156 | IPR001314 (PRINTS); IPR001254 (SMART); G3DSA:2.40.10.10 (GENE3D); G3DSA:2.40.10.10 (GENE3D); G3DSA:2.40.10.10 (GENE3D); IPR022700 (PFAM); IPR001254 (PFAM); PTHR24268:SF54 (PANTHER); PTHR24268 (PANTHER); IPR018114 (PROSITE_PATTERNS); TRANSMEMBRANE (PHOBIUS); CYTOPLASMIC_DOMAIN (PHOBIUS); NON_CYTOPLASMIC_DOMAIN (PHOBIUS); IPR001254 (PROSITE_PROFILES); IPR009003 (SUPERFAMILY); TMhelix (TMHMM)                                                                                                                                                                                                                                                                                                                                                 |
| 44 | c11097_g2_i1_len_586_path_681_0_585_1     | 4   | nedd4 family-interacting protein 1-like               | 195 | 4.51E-71  | 73.30% | 0.109 | IPR019325 (PFAM); PTHR13396 (PANTHER); TRANSMEMBRANE (PHOBIUS); CYTOPLASMIC_DOMAIN (PHOBIUS); TRANSMEMBRANE (PHOBIUS); CYTOPLASMIC_DOMAIN (PHOBIUS); NON_CYTOPLASMIC_DOMAIN (PHOBIUS); NON_CYTOPLASMIC_DOMAIN (PHOBIUS); TRANSMEMBRANE (PHOBIUS); NON_CYTOPLASMIC_DOMAIN (PHOBIUS); TRANSMEMBRANE (PHOBIUS); TMhelix (TMHMM); TMhelix (TMHMM); TMhelix (TMHMM)                                                                                                                                                                                                                                                                                                                                                                                           |

|    |                                                                |    |                                                                |     |           |        |       |                                                                                                                                                                                                                                                                                                                                                                                                                                                                                                                                                                      |
|----|----------------------------------------------------------------|----|----------------------------------------------------------------|-----|-----------|--------|-------|----------------------------------------------------------------------------------------------------------------------------------------------------------------------------------------------------------------------------------------------------------------------------------------------------------------------------------------------------------------------------------------------------------------------------------------------------------------------------------------------------------------------------------------------------------------------|
| 45 | c111109_g1_i1_len_622_path_600_0_621_0                         | 8  | leucine-rich repeats and immunoglobulin-like domains protein 1 | 208 | 2.15E-45  | 86.10% | 0.293 | IPR003598 (SMART); IPR003599 (SMART); IPR013098 (PFAM); IPR013783 (G3DSA:2.60.40.GENE3D); PTHR24367 (PANTHER); PTHR24367:SF245 (PANTHER); SIGNAL_PEPTIDE_C_REGION (PHOBIUS); SIGNAL_PEPTIDE_H_REGION (PHOBIUS); SIGNAL_PEPTIDE (PHOBIUS); NON_CYTOPLASMIC_DOMAIN (PHOBIUS); SIGNAL_PEPTIDE_N_REGION (PHOBIUS); IPR007110 (PROSITE_PROFILES); SignalP-noTM (SIGNALP_GRAM_NEGATIVE); SSF48726 (SUPERFAMILY); TMhelix (TMHMM)                                                                                                                                           |
| 46 | c111129_g1_i1_len_1087_path_1_0_876_878_877_981_878_982_1086_4 | 22 | type iv secretion protein rhs                                  | 362 | 3.21E-14  | 59.00% | 0.129 | CYTOPLASMIC_DOMAIN (PHOBIUS); TRANSMEMBRANE (PHOBIUS); TRANSMEMBRANE (PHOBIUS); NON_CYTOPLASMIC_DOMAIN (PHOBIUS); NON_CYTOPLASMIC_DOMAIN (PHOBIUS); TMhelix (TMHMM); TMhelix (TMHMM)                                                                                                                                                                                                                                                                                                                                                                                 |
| 47 | c111174_g1_i1_len_1187_path_1165_0_1186_4                      | 9  | formate dehydrogenase- large subunit                           | 396 | 0         | 99.00% | 0.212 | IPR006963 (SMART); G3DSA:2.20.25.90 (GENE3D); G3DSA:3.40.228.10 (GENE3D); IPR006656 (PFAM); G3DSA:3.40.50.740 (GENE3D); IPR006963 (PFAM); PTHR11615 (PANTHER); PTHR11615:SF38 (PANTHER); IPR027467 (PROSITE_PATTERNS); CYTOPLASMIC_DOMAIN (PHOBIUS); NON_CYTOPLASMIC_DOMAIN (PHOBIUS); TRANSMEMBRANE (PHOBIUS); IPR006963 (PROSITE_PROFILES); SSF53706 (SUPERFAMILY); TMhelix (TMHMM)                                                                                                                                                                                |
| 48 | c111229_g1_i1_len_459_path_1_0_458_3                           | 3  | krueppel-like factor 15                                        | 153 | 1.01E-56  | 78.00% | 0.104 | IPR015880 (SMART); IPR013087 (G3DSA:3.30.160.GENE3D); PF13465 (PFAM); IPR013087 (G3DSA:3.30.160.GENE3D); PTHR23223:SF146 (PANTHER); PTHR23223 (PANTHER); IPR007087 (PROSITE_PATTERNS); IPR007087 (PROSITE_PATTERNS); IPR007087 (PROSITE_PROFILES); IPR007087 (PROSITE_PROFILES); IPR007087 (PROSITE_PROFILES); SSF57667 (SUPERFAMILY)                                                                                                                                                                                                                                |
| 49 | c111250_g1_i1_len_886_path_864_0_885_0                         | 7  | attractin-like protein partial                                 | 296 | 3.70E-98  | 65.70% | 0.1   | IPR016201 (SMART); IPR002049 (SMART); IPR002049 (PFAM); IPR002165 (PFAM); G3DSA:2.10.25.10 (GENE3D); G3DSA:2.10.25.10 (GENE3D); PTHR10574 (PANTHER); PTHR10574:SF3 (PANTHER); SSF57196 (SUPERFAMILY)                                                                                                                                                                                                                                                                                                                                                                 |
| 50 | c111460_g1_i1_len_1592_path_1570_0_1591_1                      | 10 | outer membrane autotransporter barrel domain protein           | 531 | 0         | 99.90% | 0.291 | IPR006315 (TIGRFAM); IPR012332 (G3DSA:2.160.20.GENE3D); NON_CYTOPLASMIC_DOMAIN (PHOBIUS); TRANSMEMBRANE (PHOBIUS); TRANSMEMBRANE (PHOBIUS); NON_CYTOPLASMIC_DOMAIN (PHOBIUS); CYTOPLASMIC_DOMAIN (PHOBIUS); IPR011050 (SUPERFAMILY); TMhelix (TMHMM); TMhelix (TMHMM)                                                                                                                                                                                                                                                                                                |
| 51 | c111472_g1_i1_len_268_path_1_0_267_5                           | 0  | chondroitin sulfate synthase 1                                 | 89  | 9.24E-08  | 74.30% | 0.1   | CYTOPLASMIC_DOMAIN (PHOBIUS); NON_CYTOPLASMIC_DOMAIN (PHOBIUS); TRANSMEMBRANE (PHOBIUS); TMhelix (TMHMM)                                                                                                                                                                                                                                                                                                                                                                                                                                                             |
| 52 | c111500_g1_i1_len_2313_path_2291_0_2312_2                      | 20 | protein fem-1 homolog c isoform x1                             | 771 | 0         | 75.90% | 0.103 | IPR002110 (SMART); IPR020683 (PFAM); IPR020683 (G3DSA:1.25.40.GENE3D); PTHR24182 (PANTHER); PTHR24182:SF9 (PANTHER); TRANSMEMBRANE (PHOBIUS); TRANSMEMBRANE (PHOBIUS); NON_CYTOPLASMIC_DOMAIN (PHOBIUS); NON_CYTOPLASMIC_DOMAIN (PHOBIUS); CYTOPLASMIC_DOMAIN (PHOBIUS); TRANSMEMBRANE (PHOBIUS); CYTOPLASMIC_DOMAIN (PHOBIUS); IPR002110 (PROSITE_PROFILES); IPR002110 (PROSITE_PROFILES); IPR002110 (PROSITE_PROFILES); IPR002110 (PROSITE_PROFILES); IPR002110 (PROSITE_PROFILES); IPR002110 (PROSITE_PROFILES); IPR020683 (SUPERFAMILY); IPR020683 (SUPERFAMILY) |
| 53 | c111535_g1_i1_len_471_path_1_0_470_4                           | 21 | potassium:sodium hyperpolarization activated                   | 157 | 7.97E-08  | 61.60% | 0.133 | IPR013087 (G3DSA:3.30.160.GENE3D); PF13465 (PFAM); IPR007087 (PROSITE_PROFILES); SSF57667 (SUPERFAMILY)                                                                                                                                                                                                                                                                                                                                                                                                                                                              |
| 54 | c111547_g1_i1_len_1069_path_1_0_1068_5                         | 14 | hsp70 family protein                                           | 356 | 0         | 99.00% | 0.112 | IPR013126 (PRINTS); IPR013126 (PFAM); G3DSA:3.30.420.40 (GENE3D); IPR029047 (G3DSA:2.60.34.GENE3D); G3DSA:3.30.420.40 (GENE3D); PTHR19375:SF151 (PANTHER); PTHR19375 (PANTHER); IPR018181 (PROSITE_PATTERNS); IPR018181 (PROSITE_PATTERNS); SSF53067 (SUPERFAMILY); SSF53067 (SUPERFAMILY); IPR029047 (SUPERFAMILY)                                                                                                                                                                                                                                                  |
| 55 | c111638_g1_i1_len_1336_path_1314_0_1335_3                      | 27 | ecto-nox disulfide-thiol exchanger 2                           | 446 | 4.97E-112 | 77.10% | 0.114 | Coil (COILS); Coil (COILS); PTHR16001 (PANTHER)                                                                                                                                                                                                                                                                                                                                                                                                                                                                                                                      |
| 56 | c111841_g1_i1_len_827_path_805_0_826_4                         | 19 | neutral ceramidase                                             | 270 | 7.99E-61  | 65.00% | 0.108 | IPR006823 (PFAM); IPR006823 (PANTHER); PTHR12670:SF1 (PANTHER)                                                                                                                                                                                                                                                                                                                                                                                                                                                                                                       |
| 57 | c112063_g1_i1_len_1236_path_1214_0_1235_2                      | 44 | endothelin-converting enzyme 1-like                            | 412 | 2.59E-36  | 55.70% | 0.246 | G3DSA:1.10.1380.10 (GENE3D); IPR008753 (PFAM); IPR000718 (PANTHER); CYTOPLASMIC_DOMAIN (PHOBIUS); NON_CYTOPLASMIC_DOMAIN (PHOBIUS); TRANSMEMBRANE (PHOBIUS); SSF55486 (SUPERFAMILY); TMhelix (TMHMM)                                                                                                                                                                                                                                                                                                                                                                 |
| 58 | c112098_g1_i1_len_915_path_1_0_914_1                           | 6  | lysosomal alpha-mannosidase                                    | 305 | 2.49E-89  | 65.70% | 0.134 | G3DSA:2.70.98.30 (GENE3D); IPR013780 (G3DSA:2.60.40.GENE3D); IPR011682 (PFAM); PTHR11607 (PANTHER); PTHR11607:SF3 (PANTHER); IPR011013 (SUPERFAMILY)                                                                                                                                                                                                                                                                                                                                                                                                                 |



|    |                                           |    |                                                                 |     |           |        |       |                                                                                                                                                                                                                                                                                                                                                                                                                                                                                                                                            |
|----|-------------------------------------------|----|-----------------------------------------------------------------|-----|-----------|--------|-------|--------------------------------------------------------------------------------------------------------------------------------------------------------------------------------------------------------------------------------------------------------------------------------------------------------------------------------------------------------------------------------------------------------------------------------------------------------------------------------------------------------------------------------------------|
| 59 | c112161_g1_i1_len_745_path_723_0_744_0    | 9  | tissue factor pathway inhibitor 2                               | 249 | 9.52E-34  | 51.60% | 0.131 | IPR002223 (PRINTS); IPR002223 (SMART); IPR002223 (G3DSA:4.10.410.GENE3D); IPR002223 (G3DSA:4.10.410.GENE3D); IPR002223 (PFAM); PTHR10083 (PANTHER); IPR020901 (PROSITE_PATTERNS); IPR020901 (PROSITE_PATTERNS); NON_CYTOPLASMIC_DOMAIN (PHOBIUS); TRANSMEMBRANE (PHOBIUS); CYTOPLASMIC_DOMAIN (PHOBIUS); IPR002223 (PROSITE_PROFILES); IPR002223 (PROSITE_PROFILES); IPR002223 (SUPERFAMILY); IPR002223 (SUPERFAMILY); IPR002223 (SUPERFAMILY)                                                                                             |
| 60 | c112272_g1_i1_len_1408_path_1386_0_1407_0 | 23 | endothelin-converting enzyme 1 isoform x2                       | 470 | 1.89E-150 | 66.30% | 0.27  | IPR018497 (PRINTS); IPR018497 (PFAM); IPR024079 (G3DSA:3.40.390.GENE3D); IPR008753 (PFAM); IPR000718 (PANTHER); IPR029733 (PTHR11733:PANTHER); NON_CYTOPLASMIC_DOMAIN (PHOBIUS); TRANSMEMBRANE (PHOBIUS); CYTOPLASMIC_DOMAIN (PHOBIUS); SSF55486 (SUPERFAMILY); TMhelix (TMHMM)                                                                                                                                                                                                                                                            |
| 61 | c112359_g1_i1_len_573_path_551_0_572_0    | 4  | hypoxanthine partial                                            | 191 | 7.20E-136 | 99.70% | 0.138 | IPR008274 (G3DSA:3.30.365.GENE3D); IPR008274 (PFAM); IPR008274 (G3DSA:3.30.365.GENE3D); PTHR11908 (PANTHER); PTHR11908:SF64 (PANTHER); IPR008274 (SUPERFAMILY)                                                                                                                                                                                                                                                                                                                                                                             |
| 62 | c112607_g1_i1_len_1962_path_1_0_1961_2    | 50 | dual specificity mitogen-activated protein kinase kinase 4-like | 654 | 0         | 89.90% | 0.169 | IPR002290 (SMART); G3DSA:1.10.510.10 (GENE3D); IPR000719 (PFAM); G3DSA:3.30.200.20 (GENE3D); PTHR24360:SF46 (PANTHER); PTHR24360 (PANTHER); IPR008271 (PROSITE_PATTERNS); IPR017441 (PROSITE_PATTERNS); CYTOPLASMIC_DOMAIN (PHOBIUS); TRANSMEMBRANE (PHOBIUS); NON_CYTOPLASMIC_DOMAIN (PHOBIUS); IPR000719 (PROSITE_PROFILES); IPR011009 (SUPERFAMILY)                                                                                                                                                                                     |
| 63 | c112661_g1_i1_len_776_path_754_0_775_3    | 10 | histone h2a                                                     | 259 | 7.46E-79  | 99.90% | 0.334 | IPR002119 (PRINTS); IPR002119 (SMART); IPR009072 (G3DSA:1.10.20.GENE3D); IPR007125 (PFAM); PTHR23430:SF45 (PANTHER); PTHR23430 (PANTHER); IPR002119 (PROSITE_PATTERNS); IPR009072 (SUPERFAMILY)                                                                                                                                                                                                                                                                                                                                            |
| 64 | c112698_g1_i1_len_1031_path_1_0_1030_4    | 21 | beta-lactamase                                                  | 344 | 0         | 99.80% | 0.115 | IPR000871 (PRINTS); PF13354 (PFAM); IPR012338 (G3DSA:3.40.710.GENE3D); IPR023650 (PROSITE_PATTERNS); NON_CYTOPLASMIC_DOMAIN (PHOBIUS); TRANSMEMBRANE (PHOBIUS); CYTOPLASMIC_DOMAIN (PHOBIUS); IPR012338 (SUPERFAMILY)                                                                                                                                                                                                                                                                                                                      |
| 65 | c112765_g1_i1_len_830_path_1_0_829_1      | 14 | hemocytin isoform x1                                            | 271 | 3.28E-14  | 47.00% | 0.102 | IPR006207 (PROSITE_PROFILES)                                                                                                                                                                                                                                                                                                                                                                                                                                                                                                               |
| 66 | c113336_g1_i1_len_568_path_1_0_567_3      | 8  | zinc finger and btb domain-containing protein 17                | 190 | 1.37E-70  | 55.50% | 0.101 | IPR015880 (SMART); PF13465 (PFAM); PF13909 (PFAM); IPR013087 (G3DSA:3.30.160.GENE3D); IPR013087 (G3DSA:3.30.160.GENE3D); IPR013087 (G3DSA:3.30.160.GENE3D); IPR013087 (G3DSA:3.30.160.GENE3D); PTHR24409 (PANTHER); IPR007087 (PROSITE_PATTERNS); IPR007087 (PROSITE_PATTERNS); IPR007087 (PROSITE_PATTERNS); IPR007087 (PROSITE_PATTERNS); IPR007087 (PROSITE_PROFILES); IPR007087 (PROSITE_PROFILES); IPR007087 (PROSITE_PROFILES); IPR007087 (PROSITE_PROFILES); SSF57667 (SUPERFAMILY); SSF57667 (SUPERFAMILY); SSF57667 (SUPERFAMILY) |
| 67 | c113356_g1_i1_len_1660_path_1_0_1659_2    | 29 | low quality protein: otogelin                                   | 553 | 2.87E-17  | 43.70% | 0.12  | no IPS match                                                                                                                                                                                                                                                                                                                                                                                                                                                                                                                               |
| 68 | c113420_g1_i1_len_980_path_972_0_979_4    | 23 | rac protein kinase drac-                                        | 321 | 1.62E-155 | 85.80% | 0.157 | IPR000961 (SMART); IPR002290 (SMART); IPR017892 (PFAM); IPR000719 (PFAM); G3DSA:1.10.510.10 (GENE3D); PTHR24351:SF64 (PANTHER); PTHR24351 (PANTHER); IPR008271 (PROSITE_PATTERNS); IPR000719 (PROSITE_PROFILES); IPR000961 (PROSITE_PROFILES); IPR011009 (SUPERFAMILY)                                                                                                                                                                                                                                                                     |
| 69 | c113461_g1_i1_len_711_path_1_0_710_0      | 11 | epidermal growth factor-like protein 7                          | 237 | 1.20E-29  | 49.90% | 0.117 | Coil (COILS); Coil (COILS); IPR001881 (SMART); IPR000742 (SMART); IPR000742 (PFAM); IPR001881 (PFAM); G3DSA:2.10.25.10 (GENE3D); G3DSA:2.10.25.10 (GENE3D); PTHR14949 (PANTHER); PTHR14949:SF14 (PANTHER); IPR000152 (PROSITE_PATTERNS); IPR013032 (PROSITE_PATTERNS); IPR013032 (PROSITE_PATTERNS); IPR013032 (PROSITE_PATTERNS); IPR018097 (PROSITE_PATTERNS); IPR000742 (PROSITE_PROFILES); IPR000742 (PROSITE_PROFILES); SSF57196 (SUPERFAMILY); SSF57196 (SUPERFAMILY)                                                                |
| 70 | c113632_g1_i1_len_1331_path_1309_0_1330_0 | 82 | phospholipase lecithinase hemolysin                             | 438 | 1.94E-14  | 44.90% | 0.24  | TRANSMEMBRANE (PHOBIUS); NON_CYTOPLASMIC_DOMAIN (PHOBIUS); TRANSMEMBRANE (PHOBIUS); TRANSMEMBRANE (PHOBIUS); CYTOPLASMIC_DOMAIN (PHOBIUS); CYTOPLASMIC_DOMAIN (PHOBIUS); NON_CYTOPLASMIC_DOMAIN (PHOBIUS); NON_CYTOPLASMIC_DOMAIN (PHOBIUS); TRANSMEMBRANE (PHOBIUS); TMhelix (TMHMM); TMhelix (TMHMM)                                                                                                                                                                                                                                     |

|    |                                                        |    |                                                         |     |           |        |         |                                                                                                                                                                                                                                                                                                                                                                                                                                                                                                                      |
|----|--------------------------------------------------------|----|---------------------------------------------------------|-----|-----------|--------|---------|----------------------------------------------------------------------------------------------------------------------------------------------------------------------------------------------------------------------------------------------------------------------------------------------------------------------------------------------------------------------------------------------------------------------------------------------------------------------------------------------------------------------|
| 71 | c113786_g1_i1_len_516_path_1_0_515_3                   | 3  | netrin-g1 ligand                                        | 172 | 1.29E-70  | 78.20% | 0.133   | IPR003591 (SMART); G3DSA:3.80.10.10 (GENE3D); IPR001611 (PFAM); IPR026906 (PFAM); PTHR24367 (PANTHER); PTHR24367:SF227 (PANTHER); SSF52058 (SUPERFAMILY)                                                                                                                                                                                                                                                                                                                                                             |
| 72 | c113825_g1_i1_len_1318_path_1304_0_1317_0              | 71 | probable trna n6-adenosine threonylcarbamoyltransferase | 440 | 0         | 89.00% | 0.549 Y | IPR017861 (PRINTS); G3DSA:3.30.420.40 (GENE3D); IPR017861 (TIGRFAM); IPR000905 (PFAM); PTHR11735:SF6 (PANTHER); PTHR11735 (PANTHER); IPR017860 (PROSITE_PATTERNS); SignalP-noTM (SIGNALP_EUK); SSF53067 (SUPERFAMILY)                                                                                                                                                                                                                                                                                                |
| 73 | c114008_g1_i1_len_660_path_1_0_659_0                   | 7  | iron zinc purple acid phosphatase-like partial          | 220 | 6.44E-74  | 73.40% | 0.195   | IPR029052 (G3DSA:3.60.21.GENE3D); IPR018946 (PFAM); IPR015914 (G3DSA:2.60.40.GENE3D); PTHR22953:SF9 (PANTHER); PTHR22953 (PANTHER); TRANSMEMBRANE (PHOBIUS); NON_CYTOPLASMIC_DOMAIN (PHOBIUS); CYTOPLASMIC_DOMAIN (PHOBIUS); IPR029052 (SUPERFAMILY); IPR008963 (SUPERFAMILY); TMhelix (TMHMM)                                                                                                                                                                                                                       |
| 74 | c114019_g1_i1_len_1382_path_1_0_1381_0                 | 27 | multiple pdz domain                                     | 461 | 2.79E-109 | 77.10% | 0.113   | IPR001478 (SMART); IPR001478 (G3DSA:2.30.42.GENE3D); IPR001478 (PFAM); IPR001478 (G3DSA:2.30.42.GENE3D); PTHR19964:SF34 (PANTHER); PTHR19964 (PANTHER); TRANSMEMBRANE (PHOBIUS); CYTOPLASMIC_DOMAIN (PHOBIUS); NON_CYTOPLASMIC_DOMAIN (PHOBIUS); IPR001478 (PROSITE_PROFILES); IPR001478 (PROSITE_PROFILES); IPR001478 (SUPERFAMILY); IPR001478 (SUPERFAMILY); IPR001478 (SUPERFAMILY)                                                                                                                               |
| 75 | c114019_g1_i1_len_1382_path_1_0_1381_2                 | 27 | multiple pdz domain                                     | 460 | 5.42E-31  | 91.80% | 0.182   | IPR001478 (SMART); IPR001478 (PFAM); IPR001478 (G3DSA:2.30.42.GENE3D); PTHR19964:SF10 (PANTHER); PTHR19964 (PANTHER); TRANSMEMBRANE (PHOBIUS); NON_CYTOPLASMIC_DOMAIN (PHOBIUS); CYTOPLASMIC_DOMAIN (PHOBIUS); IPR001478 (PROSITE_PROFILES); IPR001478 (SUPERFAMILY)                                                                                                                                                                                                                                                 |
| 76 | c114035_g1_i1_len_1169_path_3_0_1168_5                 | 25 | zinc finger protein 282                                 | 378 | 4.26E-15  | 58.80% | 0.103   | IPR015880 (SMART); IPR007087 (PFAM); IPR013087 (G3DSA:3.30.160.GENE3D); IPR013087 (G3DSA:3.30.160.GENE3D); PTHR24409 (PANTHER); PTHR24409:SF14 (PANTHER); IPR007087 (PROSITE_PATTERNS); IPR007087 (PROSITE_PATTERNS); IPR007087 (PROSITE_PATTERNS); TRANSMEMBRANE (PHOBIUS); TRANSMEMBRANE (PHOBIUS); NON_CYTOPLASMIC_DOMAIN (PHOBIUS); CYTOPLASMIC_DOMAIN (PHOBIUS); CYTOPLASMIC_DOMAIN (PHOBIUS); IPR007087 (PROSITE_PROFILES); IPR007087 (PROSITE_PROFILES); IPR007087 (PROSITE_PROFILES); SSF57667 (SUPERFAMILY) |
| 77 | c114045_g1_i1_len_305_path_1_0_304_1                   | 0  | phenoloxidase subunit a3                                | 102 | 5.60E-13  | 57.00% | 0.138   | IPR005204 (PFAM); IPR005204 (G3DSA:1.20.1370.GENE3D); IPR008922 (G3DSA:1.10.1280.GENE3D); IPR005204 (SUPERFAMILY)                                                                                                                                                                                                                                                                                                                                                                                                    |
| 78 | c114240_g1_i1_len_1703_path_1_0_1702_2                 | 76 | 26s protease regulatory subunit 6b                      | 567 | 0         | 95.10% | 0.099   | Coil (COILS); IPR003593 (SMART); G3DSA:1.10.8.60 (GENE3D); IPR005937 (TIGRFAM); IPR003959 (PFAM); IPR027417 (G3DSA:3.40.50.GENE3D); PTHR23073 (PANTHER); PTHR23073:SF8 (PANTHER); IPR003960 (PROSITE_PATTERNS); IPR027417 (SUPERFAMILY)                                                                                                                                                                                                                                                                              |
| 79 | c1144_g1_i1_len_1014_path_3001_0_1012_4018_1013_1013_0 | 23 | group 3 secretory phospholipase a2                      | 338 | 1.19E-71  | 54.90% | 0.104   | Coil (COILS); IPR001211 (PFAM); IPR016090 (G3DSA:1.20.90.GENE3D); PTHR12253 (PANTHER); IPR016090 (SUPERFAMILY)                                                                                                                                                                                                                                                                                                                                                                                                       |
| 80 | c114450_g1_i1_len_796_path_1_0_795_0                   | 9  | vitellogenin- partial                                   | 260 | 1.46E-14  | 44.80% | 0.12    | PTHR23345 (PANTHER); PTHR23345:SF1 (PANTHER); IPR001846 (PROSITE_PROFILES)                                                                                                                                                                                                                                                                                                                                                                                                                                           |
| 81 | c114620_g1_i1_len_1094_path_1_0_1093_2                 | 27 | krueppel-like factor 13                                 | 364 | 2.62E-50  | 82.60% | 0.157   | IPR015880 (SMART); IPR013087 (G3DSA:3.30.160.GENE3D); IPR013087 (G3DSA:3.30.160.GENE3D); PF13465 (PFAM); PTHR23223 (PANTHER); IPR007087 (PROSITE_PATTERNS); IPR007087 (PROSITE_PATTERNS); CYTOPLASMIC_DOMAIN (PHOBIUS); TRANSMEMBRANE (PHOBIUS); NON_CYTOPLASMIC_DOMAIN (PHOBIUS); IPR007087 (PROSITE_PROFILES); IPR007087 (PROSITE_PROFILES); SSF57667 (SUPERFAMILY); TMhelix (TMHMM)                                                                                                                               |
| 82 | c11516_g1_i1_len_274_path_252_0_273_5                  | 0  | alpha-amylase                                           | 91  | 8.75E-58  | 99.40% | 0.158   | IPR013781 (G3DSA:3.20.20.GENE3D); IPR006047 (PFAM); IPR015902 (PANTHER); PTHR10357:SF11 (PANTHER); IPR017853 (SUPERFAMILY)                                                                                                                                                                                                                                                                                                                                                                                           |
| 83 | c11516_g2_i1_len_765_path_503_0_764_4                  | 7  | alpha-amylase                                           | 255 | 0         | 99.00% | 0.099   | IPR006589 (SMART); IPR013781 (G3DSA:3.20.20.GENE3D); IPR006047 (PFAM); IPR015902 (PANTHER); PTHR10357:SF11 (PANTHER); IPR017853 (SUPERFAMILY)                                                                                                                                                                                                                                                                                                                                                                        |
| 84 | c115247_g1_i1_len_317_path_295_0_316_1                 | 2  | aldehyde partial                                        | 106 | 3.67E-66  | 98.90% | 0.11    | IPR015590 (PFAM); IPR016162 (G3DSA:3.40.605.GENE3D); IPR015657 (PTHR11699:PANTHER); PTHR11699 (PANTHER); IPR016160 (PROSITE_PATTERNS); IPR029510 (PROSITE_PATTERNS); IPR016161 (SUPERFAMILY)                                                                                                                                                                                                                                                                                                                         |

|    |                                              |    |                                            |     |           |        |         |                                                                                                                                                                                                                                                                                                                                                                                                                                                                                                                                                                                                                              |
|----|----------------------------------------------|----|--------------------------------------------|-----|-----------|--------|---------|------------------------------------------------------------------------------------------------------------------------------------------------------------------------------------------------------------------------------------------------------------------------------------------------------------------------------------------------------------------------------------------------------------------------------------------------------------------------------------------------------------------------------------------------------------------------------------------------------------------------------|
| 85 | c115416_g1_i1_len_1100_path_1_0_1099_3       | 14 | u4 u6 small nuclear ribonucleoprotein prp4 | 367 | 0         | 83.90% | 0.122   | IPR020472 (PRINTS); IPR001680 (SMART); IPR015943 (G3DSA:2.130.10.GENE3D); IPR001680 (PFAM); IPR027106 (PANTHER); IPR019775 (PROSITE_PATTERNS); IPR001680 (PROSITE_PROFILES); IPR001680 (PROSITE_PROFILES); IPR017986 (PROSITE_PROFILES); IPR001680 (PROSITE_PROFILES); IPR001680 (PROSITE_PROFILES); IPR001680 (PROSITE_PROFILES); IPR017986 (SUPERFAMILY)                                                                                                                                                                                                                                                                   |
| 86 | c115766_g1_i1_len_869_path_1_0_868_1         | 15 | sortilin-related receptor-like             | 284 | 3.35E-79  | 66.40% | 0.104   | IPR002172 (PRINTS); IPR002172 (SMART); G3DSA:4.10.1220.10 (GENE3D); IPR002172 (G3DSA:4.10.400.GENE3D); IPR002172 (PFAM); IPR002172 (G3DSA:4.10.400.GENE3D); PTHR12106:SF7 (PANTHER); PTHR12106 (PANTHER); IPR023415 (PROSITE_PATTERNS); IPR023415 (PROSITE_PATTERNS); IPR023415 (PROSITE_PATTERNS); IPR023415 (PROSITE_PATTERNS); TRANSMEMBRANE (PHOBIUS); NON_CYTOPLASMIC_DOMAIN (PHOBIUS); CYTOPLASMIC_DOMAIN (PHOBIUS); IPR002172 (PROSITE_PROFILES); IPR002172 (PROSITE_PROFILES); IPR002172 (PROSITE_PROFILES); IPR002172 (PROSITE_PROFILES); IPR002172 (SUPERFAMILY); IPR002172 (SUPERFAMILY); IPR002172 (SUPERFAMILY) |
| 87 | c115833_g1_i1_len_1255_path_1_0_1254_1       | 65 | kunitz-like protease inhibitor             | 418 | 1.03E-40  | 55.50% | 0.142   | IPR002223 (PRINTS); IPR002223 (SMART); IPR002223 (PFAM); IPR002223 (G3DSA:4.10.410.GENE3D); IPR008037 (PFAM); IPR002223 (G3DSA:4.10.410.GENE3D); PTHR10083 (PANTHER); IPR020901 (PROSITE_PATTERNS); IPR020862 (PROSITE_PROFILES); IPR020862 (PROSITE_PROFILES); IPR002223 (PROSITE_PROFILES); IPR002223 (PROSITE_PROFILES); IPR020862 (PROSITE_PROFILES); IPR008037 (SUPERFAMILY); IPR008037 (SUPERFAMILY); IPR002223 (SUPERFAMILY); IPR008037 (SUPERFAMILY); IPR002223 (SUPERFAMILY)                                                                                                                                        |
| 88 | c115838_g1_i1_len_636_path_1_0_635_5         | 7  | 27 kda hemolymph                           | 212 | 1.20E-17  | 64.00% | 0.112   | IPR009832 (PFAM); CYTOPLASMIC_DOMAIN (PHOBIUS); NON_CYTOPLASMIC_DOMAIN (PHOBIUS); TRANSMEMBRANE (PHOBIUS); TMhelix (TMHMM); TMhelix (TMHMM)                                                                                                                                                                                                                                                                                                                                                                                                                                                                                  |
| 89 | c115841_g1_i1_len_992_path_1_0_991_0         | 6  | lipoprotein                                | 331 | 1.53E-107 | 99.40% | 0.117   | IPR000064 (PFAM); IPR000064 (G3DSA:3.90.1720.GENE3D); PTHR21666:SF194 (PANTHER); PTHR21666 (PANTHER); CYTOPLASMIC_DOMAIN (PHOBIUS); TRANSMEMBRANE (PHOBIUS); NON_CYTOPLASMIC_DOMAIN (PHOBIUS); SSF54001 (SUPERFAMILY)                                                                                                                                                                                                                                                                                                                                                                                                        |
| 90 | c115877_g1_i1_len_597_path_575_0_596_4       | 9  | catalase peroxidase partial                | 199 | 2.39E-138 | 99.90% | 0.104   | IPR002016 (PRINTS); G3DSA:1.10.420.10 (GENE3D); IPR002016 (PFAM); G3DSA:1.10.520.10 (GENE3D); PTHR30555 (PANTHER); PTHR30555:SF0 (PANTHER); IPR019793 (PROSITE_PATTERNS); IPR010255 (SUPERFAMILY)                                                                                                                                                                                                                                                                                                                                                                                                                            |
| 91 | c115912_g1_i1_len_479_path_459_0_478_2       | 3  | oocyte zinc finger protein 6               | 159 | 3.55E-18  | 61.10% | 0.184   | IPR015880 (SMART); IPR013087 (G3DSA:3.30.160.GENE3D); PF13894 (PFAM); PF13465 (PFAM); PF13912 (PFAM); IPR013087 (G3DSA:3.30.160.GENE3D); PTHR24409 (PANTHER); IPR007087 (PROSITE_PATTERNS); IPR007087 (PROSITE_PATTERNS); IPR007087 (PROSITE_PATTERNS); IPR007087 (PROSITE_PROFILES); IPR007087 (PROSITE_PROFILES); SSF57667 (SUPERFAMILY); SSF57667 (SUPERFAMILY)                                                                                                                                                                                                                                                           |
| 92 | c115984_g1_i1_len_1306_path_1284_0_1305_4    | 42 | protein spaetzle                           | 435 | 1.87E-28  | 54.30% | 0.114   | PTHR23199 (PANTHER); IPR029034 (SUPERFAMILY)                                                                                                                                                                                                                                                                                                                                                                                                                                                                                                                                                                                 |
| 93 | c11626_g1_i1_len_416_path_4_0_40_45_41_415_4 | 2  | dnaj homolog subfamily a member 2          | 139 | 8.10E-41  | 76.30% | 0.123   | IPR001623 (PRINTS); IPR001623 (SMART); IPR001623 (PFAM); IPR001623 (G3DSA:1.10.287.GENE3D); PTHR24076 (PANTHER); PTHR24076:SF1 (PANTHER); IPR018253 (PROSITE_PATTERNS); IPR001623 (PROSITE_PROFILES); IPR001623 (SUPERFAMILY)                                                                                                                                                                                                                                                                                                                                                                                                |
| 94 | c116301_g1_i1_len_531_path_509_0_530_3       | 6  | 3-hydroxy acid dehydrogenase               | 177 | 2.36E-46  | 98.70% | 0.369 Y | IPR002198 (PFAM); IPR016040 (G3DSA:3.40.50.GENE3D); PTHR24322:SF78 (PANTHER); PTHR24322 (PANTHER); SignalP-TM (SIGNALP_GRAM_NEGATIVE); SSF51735 (SUPERFAMILY)                                                                                                                                                                                                                                                                                                                                                                                                                                                                |
| 95 | c116313_g1_i1_len_916_path_1_0_915_5         | 8  | gamma-glutamyltransferase                  | 305 | 0         | 99.90% | 0.107   | IPR000101 (PRINTS); IPR000101 (TIGRFAM); IPR000101 (PFAM); IPR000101 (PANTHER); PTHR11686:SF9 (PANTHER); IPR029055 (SUPERFAMILY)                                                                                                                                                                                                                                                                                                                                                                                                                                                                                             |
| 96 | c1164_g1_i1_len_1496_path_1524_0_1495_5      | 96 | protein 60a                                | 492 | 3.06E-121 | 66.20% | 0.117   | IPR002405 (PRINTS); IPR001839 (SMART); IPR001111 (PFAM); IPR029034 (G3DSA:2.10.90.GENE3D); IPR001839 (PFAM); PTHR11848:SF54 (PANTHER); IPR015615 (PANTHER); IPR017948 (PROSITE_PATTERNS); NON_CYTOPLASMIC_DOMAIN (PHOBIUS); CYTOPLASMIC_DOMAIN (PHOBIUS); TRANSMEMBRANE (PHOBIUS); IPR001839 (PROSITE_PROFILES); IPR029034 (SUPERFAMILY); TMhelix (TMHMM)                                                                                                                                                                                                                                                                    |
| 97 | c116535_g1_i1_len_1204_path_1182_0_1203_4    | 17 | hypothetical protein BRAFLDRAFT_125057     | 401 | 1.52E-12  | 47.10% | 0.112   | no IPS match                                                                                                                                                                                                                                                                                                                                                                                                                                                                                                                                                                                                                 |

|     |                                                               |     |                                                   |     |          |        |       |                                                                                                                                                                                                                                                                                                                                                                                                                                                                                                                                                                                                                                                                                                                                                |
|-----|---------------------------------------------------------------|-----|---------------------------------------------------|-----|----------|--------|-------|------------------------------------------------------------------------------------------------------------------------------------------------------------------------------------------------------------------------------------------------------------------------------------------------------------------------------------------------------------------------------------------------------------------------------------------------------------------------------------------------------------------------------------------------------------------------------------------------------------------------------------------------------------------------------------------------------------------------------------------------|
| 98  | c1167_g1_i1_len_1190_path_1_0_683_2393_684_695_697_696_1189_4 | 37  | guanine nucleotide-binding protein subunit beta-5 | 391 | 5.14E-93 | 93.50% | 0.12  | IPR001680 (SMART); IPR001680 (PFAM); IPR015943 (G3DSA:2.130.10.GENE3D); IPR016346 (PANTHER); PTHR19850:SF12 (PANTHER); IPR019775 (PROSITE_PATTERNS); NON_CYTOPLASMIC_DOMAIN (PHOBIUS); TRANSMEMBRANE (PHOBIUS); CYTOPLASMIC_DOMAIN (PHOBIUS); IPR017986 (PROSITE_PROFILES); IPR001680 (PROSITE_PROFILES); IPR001680 (PROSITE_PROFILES); IPR001680 (PROSITE_PROFILES); IPR001680 (PROSITE_PROFILES); IPR017986 (SUPERFAMILY); TMhelix (TMHMM)                                                                                                                                                                                                                                                                                                   |
| 99  | c116829_g1_i1_len_551_path_1_0_550_0                          | 26  | 40s ribosomal protein s26                         | 178 | 2.70E-68 | 90.00% | 0.108 | IPR000892 (PFAM); IPR000892 (PANTHER); IPR000892 (PROSITE_PATTERNS)                                                                                                                                                                                                                                                                                                                                                                                                                                                                                                                                                                                                                                                                            |
| 100 | c117037_g1_i1_len_2578_path_2556_0_2577_5                     | 188 | atp-dependent zinc metalloprotease yme1 homolog   | 859 | 0        | 75.30% | 0.194 | IPR003593 (SMART); IPR005936 (TIGRFAM); IPR003959 (PFAM); IPR027417 (G3DSA:3.40.50.GENE3D); IPR000642 (PFAM); G3DSA:1.10.8.60 (GENE3D); PTHR23076:SF37 (PANTHER); PTHR23076 (PANTHER); IPR003960 (PROSITE_PATTERNS); TRANSMEMBRANE (PHOBIUS); NON_CYTOPLASMIC_DOMAIN (PHOBIUS); TRANSMEMBRANE (PHOBIUS); NON_CYTOPLASMIC_DOMAIN (PHOBIUS); TRANSMEMBRANE (PHOBIUS); CYTOPLASMIC_DOMAIN (PHOBIUS); CYTOPLASMIC_DOMAIN (PHOBIUS); IPR005936 (HAMAP); SSF140990 (SUPERFAMILY); IPR027417 (SUPERFAMILY); TMhelix (TMHMM); TMhelix (TMHMM)                                                                                                                                                                                                          |
| 101 | c117076_g1_i1_len_432_path_410_0_431_3                        | 2   | carbohydrate sulfotransferase partial             | 144 | 1.52E-52 | 70.50% | 0.099 | IPR005331 (PFAM); IPR018011 (PANTHER)                                                                                                                                                                                                                                                                                                                                                                                                                                                                                                                                                                                                                                                                                                          |
| 102 | c117203_g1_i1_len_1545_path_1_0_1544_4                        | 29  | transmembrane protease serine partial             | 515 | 7.00E-13 | 76.70% | 0.11  | IPR001254 (SMART); G3DSA:2.40.10.10 (GENE3D); IPR001254 (PFAM); PTHR24256 (PANTHER); TRANSMEMBRANE (PHOBIUS); NON_CYTOPLASMIC_DOMAIN (PHOBIUS); CYTOPLASMIC_DOMAIN (PHOBIUS); NON_CYTOPLASMIC_DOMAIN (PHOBIUS); TRANSMEMBRANE (PHOBIUS); IPR001254 (PROSITE_PROFILES); IPR009003 (SUPERFAMILY)                                                                                                                                                                                                                                                                                                                                                                                                                                                 |
| 103 | c117412_g1_i1_len_587_path_1_0_586_2                          | 3   | calumenin-like partial                            | 195 | 2.69E-95 | 79.40% | 0.108 | IPR002048 (SMART); IPR011992 (G3DSA:1.10.238.GENE3D); IPR011992 (PFAM); IPR002048 (PFAM); PTHR10827 (PANTHER); IPR018247 (PROSITE_PATTERNS); IPR018247 (PROSITE_PATTERNS); IPR002048 (PROSITE_PROFILES); IPR002048 (PROSITE_PROFILES); IPR002048 (PROSITE_PROFILES); IPR002048 (PROSITE_PROFILES); SSF47473 (SUPERFAMILY)                                                                                                                                                                                                                                                                                                                                                                                                                      |
| 104 | c117490_g1_i1_len_291_path_1_0_290_3                          | 2   | twitchin- partial                                 | 97  | 4.46E-50 | 92.20% | 0.191 | PR00014 (PRINTS); IPR003961 (SMART); IPR013783 (G3DSA:2.60.40.GENE3D); IPR003961 (PFAM); PTHR19897:SF142 (PANTHER); PTHR19897 (PANTHER); IPR003961 (PROSITE_PROFILES); IPR003961 (SUPERFAMILY)                                                                                                                                                                                                                                                                                                                                                                                                                                                                                                                                                 |
| 105 | c117563_g1_i1_len_1982_path_1960_0_1981_4                     | 93  | pleiotropic regulator 1                           | 640 | 0        | 81.40% | 0.251 | IPR020472 (PRINTS); IPR001680 (SMART); IPR001680 (PFAM); IPR015943 (G3DSA:2.130.10.GENE3D); PTHR19923 (PANTHER); PTHR19923:SF0 (PANTHER); IPR019775 (PROSITE_PATTERNS); IPR019775 (PROSITE_PATTERNS); IPR001680 (PROSITE_PROFILES); IPR017986 (PROSITE_PROFILES); IPR001680 (PROSITE_PROFILES); IPR001680 (PROSITE_PROFILES); IPR001680 (PROSITE_PROFILES); IPR001680 (PROSITE_PROFILES); IPR017986 (SUPERFAMILY)                                                                                                                                                                                                                                                                                                                              |
| 106 | c117605_g1_i1_len_2541_path_1_0_2540_3                        | 76  | translocation protein sec63 homolog               | 847 | 0        | 73.90% | 0.148 | IPR001623 (PRINTS); IPR004179 (SMART); IPR004179 (SMART); IPR001623 (SMART); IPR001623 (G3DSA:1.10.287.GENE3D); IPR000008 (G3DSA:2.60.40.GENE3D); IPR004179 (PFAM); IPR001623 (PFAM); G3DSA:1.10.150.20 (GENE3D); G3DSA:1.10.3380.10 (GENE3D); PTHR24075:SF0 (PANTHER); IPR027137 (PANTHER); NON_CYTOPLASMIC_DOMAIN (PHOBIUS); NON_CYTOPLASMIC_DOMAIN (PHOBIUS); TRANSMEMBRANE (PHOBIUS); CYTOPLASMIC_DOMAIN (PHOBIUS); TRANSMEMBRANE (PHOBIUS); NON_CYTOPLASMIC_DOMAIN (PHOBIUS); TRANSMEMBRANE (PHOBIUS); CYTOPLASMIC_DOMAIN (PHOBIUS); TRANSMEMBRANE (PHOBIUS); IPR001623 (PROSITE_PROFILES); SSF158702 (SUPERFAMILY); IPR001623 (SUPERFAMILY); IPR014756 (SUPERFAMILY); TMhelix (TMHMM); TMhelix (TMHMM); TMhelix (TMHMM); TMhelix (TMHMM) |
| 107 | c117718_g1_i1_len_1773_path_1751_0_1772_2                     | 59  | multiple inositol polyphosphate phosphatase 1     | 587 | 1.28E-71 | 59.50% | 0.192 | IPR000560 (PFAM); IPR029033 (G3DSA:3.40.50.GENE3D); PTHR20963 (PANTHER); PTHR20963:SF8 (PANTHER); TRANSMEMBRANE (PHOBIUS); TRANSMEMBRANE (PHOBIUS); NON_CYTOPLASMIC_DOMAIN (PHOBIUS); CYTOPLASMIC_DOMAIN (PHOBIUS); TRANSMEMBRANE (PHOBIUS); NON_CYTOPLASMIC_DOMAIN (PHOBIUS); CYTOPLASMIC_DOMAIN (PHOBIUS); IPR029033 (SUPERFAMILY); TMhelix (TMHMM); TMhelix (TMHMM); TMhelix (TMHMM)                                                                                                                                                                                                                                                                                                                                                        |

|     |                                                       |     |                                                                  |     |           |        |         |                                                                                                                                                                                                                                                                                                                                                                                                                                                                                                                                                                                                                                                                                                                                                                                                                                                                                    |
|-----|-------------------------------------------------------|-----|------------------------------------------------------------------|-----|-----------|--------|---------|------------------------------------------------------------------------------------------------------------------------------------------------------------------------------------------------------------------------------------------------------------------------------------------------------------------------------------------------------------------------------------------------------------------------------------------------------------------------------------------------------------------------------------------------------------------------------------------------------------------------------------------------------------------------------------------------------------------------------------------------------------------------------------------------------------------------------------------------------------------------------------|
| 108 | c117757_g1_i1_len_943_path_1_0_942_0                  | 21  | immunoglobulin-like and fibronectin type iii domain containing 7 | 310 | 7.71E-18  | 55.90% | 0.121   | IPR026966 (PFAM); PTHR10489 (PANTHER); PTHR10489:SF553 (PANTHER); NON_CYTOPLASMIC_DOMAIN (PHOBIUS); CYTOPLASMIC_DOMAIN (PHOBIUS); TRANSMEMBRANE (PHOBIUS); CYTOPLASMIC_DOMAIN (PHOBIUS); TRANSMEMBRANE (PHOBIUS); TMhelix (TMHMM); TMhelix (TMHMM)                                                                                                                                                                                                                                                                                                                                                                                                                                                                                                                                                                                                                                 |
| 109 | c117786_g1_i1_len_475_path_1_0_474_5                  | 4   | metabotropic gaba-b receptor subtype isoform b                   | 158 | 1.48E-21  | 96.10% | 0.175   | G3DSA:3.40.50.2300 (GENE3D); PTHR10519:SF3 (PANTHER); IPR002455 (PANTHER); TRANSMEMBRANE (PHOBIUS); NON_CYTOPLASMIC_DOMAIN (PHOBIUS); CYTOPLASMIC_DOMAIN (PHOBIUS); CYTOPLASMIC_DOMAIN (PHOBIUS); TRANSMEMBRANE (PHOBIUS); TRANSMEMBRANE (PHOBIUS); TRANSMEMBRANE (PHOBIUS); CYTOPLASMIC_DOMAIN (PHOBIUS); NON_CYTOPLASMIC_DOMAIN (PHOBIUS); IPR028082 (SUPERFAMILY); TMhelix (TMHMM)                                                                                                                                                                                                                                                                                                                                                                                                                                                                                              |
| 110 | c117844_g1_i1_len_899_path_877_0_898_1                | 12  | limbic system-associated membrane protein                        | 300 | 8.80E-40  | 56.00% | 0.477 Y | IPR003599 (SMART); IPR003598 (SMART); IPR013783 (G3DSA:2.60.40.GENE3D); IPR013783 (G3DSA:2.60.40.GENE3D); IPR013098 (PFAM); PF13895 (PFAM); PTHR19831 (PANTHER); PTHR19831:SF40 (PANTHER); IPR007110 (PROSITE_PROFILES); IPR007110 (PROSITE_PROFILES); SignalP-noTM (SIGNALP_EUK); SSF48726 (SUPERFAMILY); SSF48726 (SUPERFAMILY)                                                                                                                                                                                                                                                                                                                                                                                                                                                                                                                                                  |
| 111 | c11819_g1_i1_len_2411_path_4342_0_499_1909_500_2410_3 | 109 | krueppel-like factor 10                                          | 804 | 1.75E-65  | 63.20% | 0.669 Y | IPR015880 (SMART); IPR013087 (G3DSA:3.30.160.GENE3D); IPR013087 (G3DSA:3.30.160.GENE3D); PF13465 (PFAM); PTHR23223:SF21 (PANTHER); PTHR23223 (PANTHER); IPR007087 (PROSITE_PATTERNS); IPR007087 (PROSITE_PATTERNS); IPR007087 (PROSITE_PATTERNS); CYTOPLASMIC_DOMAIN (PHOBIUS); NON_CYTOPLASMIC_DOMAIN (PHOBIUS); NON_CYTOPLASMIC_DOMAIN (PHOBIUS); CYTOPLASMIC_DOMAIN (PHOBIUS); TRANSMEMBRANE (PHOBIUS); NON_CYTOPLASMIC_DOMAIN (PHOBIUS); SIGNAL_PEPTIDE_N_REGION (PHOBIUS); TRANSMEMBRANE (PHOBIUS); TRANSMEMBRANE (PHOBIUS); TRANSMEMBRANE (PHOBIUS); SIGNAL_PEPTIDE_H_REGION (PHOBIUS); SIGNAL_PEPTIDE_C_REGION (PHOBIUS); SIGNAL_PEPTIDE (PHOBIUS); IPR007087 (PROSITE_PROFILES); IPR007087 (PROSITE_PROFILES); IPR007087 (PROSITE_PROFILES); SignalP-noTM (SIGNALP_EUK); SSF57667 (SUPERFAMILY); SSF57667 (SUPERFAMILY); TMhelix (TMHMM); TMhelix (TMHMM); TMhelix (TMHMM) |
| 112 | c118315_g1_i1_len_729_path_6_0_728_5                  | 14  | proactivator polypeptide                                         | 243 | 2.32E-10  | 72.40% | 0.127   | IPR008139 (SMART); IPR008138 (PFAM); IPR011001 (G3DSA:1.10.225.GENE3D); PTHR11480:SF3 (PANTHER); PTHR11480 (PANTHER); NON_CYTOPLASMIC_DOMAIN (PHOBIUS); CYTOPLASMIC_DOMAIN (PHOBIUS); TRANSMEMBRANE (PHOBIUS); TRANSMEMBRANE (PHOBIUS); NON_CYTOPLASMIC_DOMAIN (PHOBIUS); IPR008139 (PROSITE_PROFILES); IPR011001 (SUPERFAMILY); TMhelix (TMHMM); TMhelix (TMHMM)                                                                                                                                                                                                                                                                                                                                                                                                                                                                                                                  |
| 113 | c118357_g1_i1_len_1092_path_1070_0_1091_1             | 24  | chondroitin sulfate synthase 1                                   | 364 | 2.98E-111 | 64.50% | 0.101   | IPR008428 (PFAM); IPR029044 (G3DSA:3.90.550.GENE3D); PTHR12369:SF11 (PANTHER); PTHR12369 (PANTHER); IPR029044 (SUPERFAMILY)                                                                                                                                                                                                                                                                                                                                                                                                                                                                                                                                                                                                                                                                                                                                                        |
| 114 | c118503_g1_i1_len_538_path_696_0_537_5                | 4   | exostosin-1-like isoform 1                                       | 179 | 1.87E-39  | 88.70% | 0.115   | IPR015338 (PFAM); IPR029044 (G3DSA:3.90.550.GENE3D); PTHR11062:SF7 (PANTHER); PTHR11062 (PANTHER); IPR029044 (SUPERFAMILY)                                                                                                                                                                                                                                                                                                                                                                                                                                                                                                                                                                                                                                                                                                                                                         |
| 115 | c11858_g1_i1_len_740_path_718_0_739_0                 | 6   | venom serine protease bi-vsp-like                                | 247 | 5.98E-45  | 67.00% | 0.149   | IPR001314 (PRINTS); IPR001254 (SMART); IPR001254 (PFAM); G3DSA:2.40.10.10 (GENE3D); G3DSA:2.40.10.10 (GENE3D); PTHR24268:SF97 (PANTHER); PTHR24268 (PANTHER); IPR018114 (PROSITE_PATTERNS); IPR001254 (PROSITE_PROFILES); IPR009003 (SUPERFAMILY)                                                                                                                                                                                                                                                                                                                                                                                                                                                                                                                                                                                                                                  |
| 116 | c11858_g2_i1_len_243_path_1435_0_242_2                | 0   | venom protease-like                                              | 81  | 1.99E-13  | 62.20% | 0.143   | IPR006604 (SMART); IPR022700 (PFAM)                                                                                                                                                                                                                                                                                                                                                                                                                                                                                                                                                                                                                                                                                                                                                                                                                                                |
| 117 | c118762_g1_i1_len_508_path_1_0_507_4                  | 2   | phosphoglycerate kinase                                          | 169 | 4.83E-93  | 99.90% | 0.101   | IPR015901 (G3DSA:3.40.50.GENE3D); IPR001576 (PFAM); IPR001576 (PANTHER); PTHR11406:SF0 (PANTHER); IPR001576 (SUPERFAMILY)                                                                                                                                                                                                                                                                                                                                                                                                                                                                                                                                                                                                                                                                                                                                                          |
| 118 | c11884_g1_i1_len_440_path_828_0_78_411_79_439_2       | 85  | probable chitinase 3                                             | 146 | 7.78E-28  | 69.90% | 0.114   | IPR013781 (G3DSA:3.20.20.GENE3D); IPR001223 (PFAM); PTHR11177:SF112 (PANTHER); PTHR11177 (PANTHER); TRANSMEMBRANE (PHOBIUS); CYTOPLASMIC_DOMAIN (PHOBIUS); NON_CYTOPLASMIC_DOMAIN (PHOBIUS); IPR017853 (SUPERFAMILY); TMhelix (TMHMM)                                                                                                                                                                                                                                                                                                                                                                                                                                                                                                                                                                                                                                              |
| 119 | c11884_g1_i2_len_397_path_375_0_35_411_36_396_1       | 75  | chitinase-related protein 1                                      | 132 | 3.30E-28  | 71.50% | 0.207   | IPR013781 (G3DSA:3.20.20.GENE3D); IPR001223 (PFAM); PTHR11177 (PANTHER); PTHR11177:SF112 (PANTHER); NON_CYTOPLASMIC_DOMAIN (PHOBIUS); CYTOPLASMIC_DOMAIN (PHOBIUS); TRANSMEMBRANE (PHOBIUS); IPR017853 (SUPERFAMILY); TMhelix (TMHMM)                                                                                                                                                                                                                                                                                                                                                                                                                                                                                                                                                                                                                                              |
| 120 | c119077_g1_i1_len_585_path_1_0_584_5                  | 15  | ribonuclease oy-like                                             | 195 | 6.62E-22  | 67.40% | 0.109   | IPR001568 (G3DSA:3.90.730.GENE3D); IPR001568 (PFAM); PTHR11240:SF1 (PANTHER); IPR001568 (PANTHER); IPR001568 (SUPERFAMILY)                                                                                                                                                                                                                                                                                                                                                                                                                                                                                                                                                                                                                                                                                                                                                         |



|     |                                                                         |    |                                                          |     |          |        |       |                                                                                                                                                                                                                                                                                                                                                                                                                                                                                                                                                                                                                                        |
|-----|-------------------------------------------------------------------------|----|----------------------------------------------------------|-----|----------|--------|-------|----------------------------------------------------------------------------------------------------------------------------------------------------------------------------------------------------------------------------------------------------------------------------------------------------------------------------------------------------------------------------------------------------------------------------------------------------------------------------------------------------------------------------------------------------------------------------------------------------------------------------------------|
| 121 | c119134_g1_i1_len_375_path_353_0_374_3                                  | 5  | dnaj homolog subfamily c member 10                       | 125 | 1.82E-17 | 69.90% | 0.147 | IPR012336 (G3DSA:3.40.30.GENE3D); IPR013766 (PFAM); PTHR24078:SF3 (PANTHER); PTHR24078 (PANTHER); IPR017937 (PROSITE_PATTERNS); TRANSMEMBRANE (PHOBIUS); CYTOPLASMIC_DOMAIN (PHOBIUS); NON_CYTOPLASMIC_DOMAIN (PHOBIUS); IPR012336 (SUPERFAMILY); TMhelix (TMHMM)                                                                                                                                                                                                                                                                                                                                                                      |
| 122 | c119266_g1_i1_len_640_path_618_0_639_4                                  | 4  | zinc finger protein 678-like                             | 213 | 1.70E-29 | 55.20% | 0.098 | IPR015880 (SMART); PF13465 (PFAM); IPR013087 (G3DSA:3.30.160.GENE3D); IPR007087 (PFAM); PTHR24409:SF14 (PANTHER); PTHR24409 (PANTHER); IPR007087 (PROSITE_PATTERNS); IPR007087 (PROSITE_PATTERNS); IPR007087 (PROSITE_PATTERNS); IPR007087 (PROSITE_PROFILES); IPR007087 (PROSITE_PROFILES); IPR007087 (PROSITE_PROFILES); IPR007087 (PROSITE_PROFILES); SSF57667 (SUPERFAMILY); SSF57667 (SUPERFAMILY)                                                                                                                                                                                                                                |
| 123 | c119398_g1_i1_len_701_path_1_0_700_2                                    | 5  | protein lap4 isoform x5                                  | 233 | 1.13E-47 | 66.60% | 0.1   | IPR001478 (SMART); IPR001478 (PFAM); IPR001478 (G3DSA:2.30.42.GENE3D); IPR016313 (PANTHER); PTHR23119:SF28 (PANTHER); IPR001478 (PROSITE_PROFILES); IPR001478 (SUPERFAMILY)                                                                                                                                                                                                                                                                                                                                                                                                                                                            |
| 124 | c119462_g1_i1_len_515_path_1_0_514_0                                    | 6  | echotoxin b2                                             | 172 | 8.79E-07 | 51.60% | 0.117 | IPR015926 (G3DSA:2.60.270.GENE3D); IPR015926 (SUPERFAMILY)                                                                                                                                                                                                                                                                                                                                                                                                                                                                                                                                                                             |
| 125 | c119472_g1_i1_len_309_path_63_0_308_1                                   | 0  | partial                                                  | 96  | 1.55E-10 | 69.90% | 0.118 | IPR005203 (PFAM); IPR005203 (G3DSA:2.60.40.GENE3D); PTHR11511:SF24 (PANTHER); IPR013788 (PANTHER); IPR014756 (SUPERFAMILY)                                                                                                                                                                                                                                                                                                                                                                                                                                                                                                             |
| 126 | c120115_g1_i1_len_1218_path_1_0_1217_0                                  | 10 | oxidoreductase                                           | 406 | 0        | 99.80% | 0.106 | IPR002347 (PRINTS); IPR016040 (G3DSA:3.40.50.GENE3D); PF13561 (PFAM); PTHR24322 (PANTHER); PTHR24322:SF192 (PANTHER); IPR020904 (PROSITE_PATTERNS); SSF51735 (SUPERFAMILY)                                                                                                                                                                                                                                                                                                                                                                                                                                                             |
| 127 | c12042_g1_i1_len_2291_path_1015_0_1272_228_7_1273_1757_1014_1758_2290_4 | 41 | copa-type pol polypeptide                                | 758 | 4.11E-50 | 49.80% | 0.165 | IPR001584 (PFAM); IPR013103 (PFAM); IPR012337 (G3DSA:3.30.420.GENE3D); PTHR11439 (PANTHER); PTHR11439:SF127 (PANTHER); CYTOPLASMIC_DOMAIN (PHOBIUS); NON_CYTOPLASMIC_DOMAIN (PHOBIUS); TRANSMEMBRANE (PHOBIUS); IPR001584 (PROSITE_PROFILES); IPR012337 (SUPERFAMILY)                                                                                                                                                                                                                                                                                                                                                                  |
| 128 | c120581_g1_i1_len_784_path_1_0_783_1                                    | 9  | low quality protein: zinc finger protein 233             | 261 | 2.79E-67 | 67.00% | 0.116 | IPR015880 (SMART); IPR013087 (G3DSA:3.30.160.GENE3D); IPR013087 (G3DSA:3.30.160.GENE3D); PF13465 (PFAM); IPR007087 (PFAM); IPR013087 (G3DSA:3.30.160.GENE3D); IPR013087 (G3DSA:3.30.160.GENE3D); PTHR24409 (PANTHER); IPR007087 (PROSITE_PATTERNS); IPR007087 (PROSITE_PATTERNS); IPR007087 (PROSITE_PATTERNS); IPR007087 (PROSITE_PATTERNS); IPR007087 (PROSITE_PATTERNS); IPR007087 (PROSITE_PROFILES); IPR007087 (PROSITE_PROFILES); IPR007087 (PROSITE_PROFILES); IPR007087 (PROSITE_PROFILES); IPR007087 (PROSITE_PROFILES); IPR007087 (PROSITE_PROFILES); SSF57667 (SUPERFAMILY); SSF57667 (SUPERFAMILY); SSF57667 (SUPERFAMILY) |
| 129 | c120650_g1_i1_len_368_path_346_0_367_4                                  | 4  | actin-depolymerizing factor                              | 123 | 2.34E-22 | 68.10% | 0.103 | IPR007122 (SMART); IPR007123 (PFAM); IPR029006 (G3DSA:3.40.20.GENE3D); IPR030004 (PTHR11977:PANTHER); IPR007122 (PANTHER); SSF55753 (SUPERFAMILY)                                                                                                                                                                                                                                                                                                                                                                                                                                                                                      |
| 130 | c120823_g1_i1_len_221_path_1_0_220_1                                    | 0  | ---NA---                                                 | 74  |          |        | 0.139 | IPR001229 (PFAM); IPR001229 (G3DSA:2.100.10.GENE3D); IPR001229 (SUPERFAMILY)                                                                                                                                                                                                                                                                                                                                                                                                                                                                                                                                                           |
| 131 | c120889_g1_i1_len_671_path_4_0_670_2                                    | 4  | aurora kinase a                                          | 223 | 1.61E-39 | 92.70% | 0.258 | IPR002290 (SMART); G3DSA:1.10.510.10 (GENE3D); IPR000719 (PFAM); IPR030616 (PANTHER); TRANSMEMBRANE (PHOBIUS); TRANSMEMBRANE (PHOBIUS); CYTOPLASMIC_DOMAIN (PHOBIUS); NON_CYTOPLASMIC_DOMAIN (PHOBIUS); CYTOPLASMIC_DOMAIN (PHOBIUS); IPR000719 (PROSITE_PROFILES); IPR011009 (SUPERFAMILY); TMhelix (TMHMM); TMhelix (TMHMM)                                                                                                                                                                                                                                                                                                          |
| 132 | c121260_g1_i1_len_293_path_271_0_292_5                                  | 2  | proprotein convertase subtilisin kexin type 7 isoform x1 | 97  | 3.34E-44 | 85.40% | 0.109 | IPR000209 (PFAM); IPR000209 (G3DSA:3.40.50.GENE3D); IPR015500 (PANTHER); PTHR10795:SF9 (PANTHER); IPR023828 (PROSITE_PATTERNS); IPR000209 (SUPERFAMILY)                                                                                                                                                                                                                                                                                                                                                                                                                                                                                |
| 133 | c121290_g1_i1_len_1093_path_1209_0_1092_4                               | 6  | glycogen branching partial                               | 364 | 0        | 99.90% | 0.109 | IPR006589 (SMART); IPR013783 (G3DSA:2.60.40.GENE3D); IPR006407 (TIGRFAM); IPR013781 (G3DSA:3.20.20.GENE3D); IPR006047 (PFAM); IPR015902 (PANTHER); PTHR10357:SF110 (PANTHER); IPR017853 (SUPERFAMILY)                                                                                                                                                                                                                                                                                                                                                                                                                                  |
| 134 | c121447_g1_i1_len_713_path_691_0_712_5                                  | 6  | conserved hypothetical protein                           | 237 | 3.33E-07 | 67.00% | 0.286 | TRANSMEMBRANE (PHOBIUS); CYTOPLASMIC_DOMAIN (PHOBIUS); TRANSMEMBRANE (PHOBIUS); CYTOPLASMIC_DOMAIN (PHOBIUS); TRANSMEMBRANE (PHOBIUS); NON_CYTOPLASMIC_DOMAIN (PHOBIUS); NON_CYTOPLASMIC_DOMAIN (PHOBIUS); TMhelix (TMHMM); TMhelix (TMHMM)                                                                                                                                                                                                                                                                                                                                                                                            |

|     |                                                                 |      |                                                                                                    |     |           |        |         |                                                                                                                                                                                                                                                                                                                                                                                                                                                                                                                                                     |
|-----|-----------------------------------------------------------------|------|----------------------------------------------------------------------------------------------------|-----|-----------|--------|---------|-----------------------------------------------------------------------------------------------------------------------------------------------------------------------------------------------------------------------------------------------------------------------------------------------------------------------------------------------------------------------------------------------------------------------------------------------------------------------------------------------------------------------------------------------------|
| 135 | c121675_g1_i1_len_708_path_1_0_707_4                            | 8    | poly -specific endoribonuclease homolog                                                            | 236 | 1.51E-56  | 61.60% | 0.718 Y | IPR018998 (PFAM); PTHR12439 (PANTHER); SIGNAL_PEPTIDE (PHOBIUS); SIGNAL_PEPTIDE_H_REGION (PHOBIUS); SIGNAL_PEPTIDE_N_REGION (PHOBIUS); NON_CYTOPLASMIC_DOMAIN (PHOBIUS); SIGNAL_PEPTIDE_C_REGION (PHOBIUS); SignalP-noTM (SIGNALP_EUK); SSF142877 (SUPERFAMILY)                                                                                                                                                                                                                                                                                     |
| 136 | c121686_g1_i1_len_290_path_268_0_289_4                          | 2    | protein sda1 homolog                                                                               | 97  | 3.94E-42  | 89.60% | 0.206   | IPR007949 (PFAM); IPR027312 (PTHR12730:PANTHER); PTHR12730 (PANTHER)                                                                                                                                                                                                                                                                                                                                                                                                                                                                                |
| 137 | c12172_g2_i1_len_687_path_665_0_686_1                           | 6    | calcium calmodulin-dependent protein kinase kinase 1-like isoform x2                               | 229 | 2.39E-55  | 88.90% | 0.128   | IPR002290 (SMART); G3DSA:1.10.510.10 (GENE3D); IPR000719 (PFAM); IPR020636 (PANTHER); PTHR24347:SF141 (PANTHER); IPR008271 (PROSITE_PATTERNS); IPR000719 (PROSITE_PROFILES); IPR011009 (SUPERFAMILY)                                                                                                                                                                                                                                                                                                                                                |
| 138 | c1218_g1_i1_len_1397_path_1_0_908_910_909_1007_1009_1008_1396_0 | 136  | d-aspartate oxidase                                                                                | 466 | 4.37E-99  | 63.60% | 0.119   | IPR006076 (PFAM); IPR016040 (G3DSA:3.40.50.GENE3D); PTHR11530:SF0 (PANTHER); IPR023209 (PANTHER); IPR006181 (PROSITE_PATTERNS); NON_CYTOPLASMIC_DOMAIN (PHOBIUS); CYTOPLASMIC_DOMAIN (PHOBIUS); TRANSMEMBRANE (PHOBIUS); SSF54373 (SUPERFAMILY); SSF51971 (SUPERFAMILY); TMhelix (TMHMM); TMhelix (TMHMM)                                                                                                                                                                                                                                           |
| 139 | c1218_g1_i2_len_1298_path_1_0_908_1009_909_1297_0               | 72   | d-aspartate oxidase                                                                                | 433 | 9.46E-79  | 56.90% | 0.119   | G3DSA:3.30.9.10 (GENE3D); IPR016040 (G3DSA:3.40.50.GENE3D); IPR006076 (PFAM); PTHR11530:SF0 (PANTHER); IPR023209 (PANTHER); IPR006181 (PROSITE_PATTERNS); NON_CYTOPLASMIC_DOMAIN (PHOBIUS); TRANSMEMBRANE (PHOBIUS); CYTOPLASMIC_DOMAIN (PHOBIUS); SSF51971 (SUPERFAMILY); SSF54373 (SUPERFAMILY); TMhelix (TMHMM); TMhelix (TMHMM)                                                                                                                                                                                                                 |
| 140 | c12203_g1_i1_len_1314_path_1_0_1313_2                           | 11   | partial                                                                                            | 438 | 0         | 99.00% | 0.261   | IPR001661 (PFAM); IPR001661 (PANTHER); PTHR23403:SF1 (PANTHER); IPR018232 (PROSITE_PATTERNS); IPR008928 (SUPERFAMILY)                                                                                                                                                                                                                                                                                                                                                                                                                               |
| 141 | c12213_g1_i1_len_2408_path_2386_0_1296_368_3_1297_2407_2        | 119  | endoplasmic reticulum resident protein 44 isoform x3                                               | 802 | 0         | 79.10% | 0.154   | IPR013766 (PFAM); IPR012336 (G3DSA:3.40.30.GENE3D); IPR012336 (G3DSA:3.40.30.GENE3D); PF13848 (PFAM); PTHR18929:SF49 (PANTHER); PTHR18929 (PANTHER); TRANSMEMBRANE (PHOBIUS); CYTOPLASMIC_DOMAIN (PHOBIUS); CYTOPLASMIC_DOMAIN (PHOBIUS); TRANSMEMBRANE (PHOBIUS); NON_CYTOPLASMIC_DOMAIN (PHOBIUS); TRANSMEMBRANE (PHOBIUS); NON_CYTOPLASMIC_DOMAIN (PHOBIUS); IPR012336 (PROSITE_PROFILES); IPR012336 (SUPERFAMILY); IPR012336 (SUPERFAMILY); IPR012336 (SUPERFAMILY); IPR012336 (SUPERFAMILY); TMhelix (TMHMM); TMhelix (TMHMM); TMhelix (TMHMM) |
| 142 | c122163_g1_i1_len_546_path_1_0_545_5                            | 8    | fk506-binding protein 4                                                                            | 182 | 4.51E-46  | 75.80% | 0.133   | G3DSA:3.10.50.40 (GENE3D); IPR001179 (PFAM); IPR023566 (PANTHER); PTHR10516:SF274 (PANTHER); IPR001179 (PROSITE_PROFILES); SSF54534 (SUPERFAMILY)                                                                                                                                                                                                                                                                                                                                                                                                   |
| 143 | c122246_g1_i1_len_327_path_1_0_326_3                            | 3    | tyrosine-protein kinase dnt                                                                        | 109 | 6.71E-31  | 69.10% | 0.12    | IPR001245 (PFAM); G3DSA:3.30.200.20 (GENE3D); PTHR24416 (PANTHER); PTHR24416:SF256 (PANTHER); IPR000719 (PROSITE_PROFILES); IPR011009 (SUPERFAMILY)                                                                                                                                                                                                                                                                                                                                                                                                 |
| 144 | c122499_g1_i1_len_350_path_328_0_349_0                          | 3    | low quality protein: von willebrand factor type egf and pentraxin domain-containing protein 1-like | 117 | 6.43E-42  | 75.50% | 0.102   | IPR011641 (PFAM); G3DSA:2.10.50.10 (GENE3D); PTHR24049 (PANTHER); PTHR24049:SF6 (PANTHER); IPR009030 (SUPERFAMILY)                                                                                                                                                                                                                                                                                                                                                                                                                                  |
| 145 | c12265_g1_i1_len_1818_path_1_0_1817_0                           | 99   | periodic tryptophan protein 2 homolog                                                              | 606 | 0         | 79.00% | 0.108   | IPR001680 (SMART); IPR001680 (PFAM); IPR007148 (PFAM); IPR015943 (G3DSA:2.130.10.GENE3D); IPR015943 (G3DSA:2.130.10.GENE3D); IPR027145 (PANTHER); IPR019775 (PROSITE_PATTERNS); IPR019775 (PROSITE_PATTERNS); IPR001680 (PROSITE_PROFILES); IPR001680 (PROSITE_PROFILES); IPR017986 (PROSITE_PROFILES); IPR001680 (PROSITE_PROFILES); IPR011047 (SUPERFAMILY)                                                                                                                                                                                       |
| 146 | c12266_g1_i1_len_1412_path_1_0_1411_1                           | 1001 | peptidyl-prolyl cis-trans isomerase e                                                              | 465 | 2.39E-168 | 84.30% | 0.107   | IPR002130 (PRINTS); IPR000504 (SMART); IPR029000 (G3DSA:2.40.100.GENE3D); IPR000504 (PFAM); IPR012677 (G3DSA:3.30.70.GENE3D); IPR002130 (PFAM); PTHR11071:SF242 (PANTHER); IPR024936 (PANTHER); IPR020892 (PROSITE_PATTERNS); IPR002130 (PROSITE_PROFILES); IPR000504 (PROSITE_PROFILES); IPR029000 (SUPERFAMILY); SSF54928 (SUPERFAMILY)                                                                                                                                                                                                           |

|     |                                                                      |     |                                                                      |      |           |        |       |                                                                                                                                                                                                                                                                                                                                                                                                                                                                                                                                                                                                                                                                                                                                                                                                  |
|-----|----------------------------------------------------------------------|-----|----------------------------------------------------------------------|------|-----------|--------|-------|--------------------------------------------------------------------------------------------------------------------------------------------------------------------------------------------------------------------------------------------------------------------------------------------------------------------------------------------------------------------------------------------------------------------------------------------------------------------------------------------------------------------------------------------------------------------------------------------------------------------------------------------------------------------------------------------------------------------------------------------------------------------------------------------------|
| 147 | c12316_g1_i1_len_3218_path_3196_0_1562_475_9_1563_3217_2             | 384 | basement membrane-specific heparan sulfate proteoglycan core protein | 1072 | 3.14E-105 | 59.60% | 0.104 | IPR003599 (SMART); IPR003598 (SMART); IPR013783 (G3DSA:2.60.40.GENE3D); PF13895 (PFAM); IPR013783 (G3DSA:2.60.40.GENE3D); IPR013783 (G3DSA:2.60.40.GENE3D); IPR013783 (G3DSA:2.60.40.GENE3D); IPR013098 (PFAM); IPR013783 (G3DSA:2.60.40.GENE3D); IPR013151 (PFAM); PTHR10489 (PANTHER); TRANSMEMBRANE (PHOBIUS); CYTOPLASMIC_DOMAIN (PHOBIUS); TRANSMEMBRANE (PHOBIUS); TRANSMEMBRANE (PHOBIUS); NON_CYTOPLASMIC_DOMAIN (PHOBIUS); NON_CYTOPLASMIC_DOMAIN (PHOBIUS); CYTOPLASMIC_DOMAIN (PHOBIUS); CYTOPLASMIC_DOMAIN (PHOBIUS); TRANSMEMBRANE (PHOBIUS); IPR007110 (PROSITE_PROFILES); IPR007110 (PROSITE_PROFILES); IPR007110 (PROSITE_PROFILES); SSF48726 (SUPERFAMILY); SSF48726 (SUPERFAMILY); SSF48726 (SUPERFAMILY); TMhelix (TMHMM); TMhelix (TMHMM); TMhelix (TMHMM); TMhelix (TMHMM); |
| 148 | c123169_g1_i1_len_1103_path_1081_0_1102_4                            | 14  | secreted salivary gland                                              | 368  | 2.22E-30  | 50.30% | 0.107 | IPR004991 (PFAM); IPR023307 (G3DSA:2.170.15.GENE3D); NON_CYTOPLASMIC_DOMAIN (PHOBIUS); NON_CYTOPLASMIC_DOMAIN (PHOBIUS); TRANSMEMBRANE (PHOBIUS); CYTOPLASMIC_DOMAIN (PHOBIUS); TRANSMEMBRANE (PHOBIUS); SSF56973 (SUPERFAMILY); TMhelix (TMHMM); TMhelix (TMHMM)                                                                                                                                                                                                                                                                                                                                                                                                                                                                                                                                |
| 149 | c12324_g1_i1_len_1660_path_1_0_1246_2516_1_247_1659_3                | 26  | l-xylulose 3-keto-l-gulonate kinase                                  | 554  | 0         | 97.70% | 0.134 | IPR018484 (PFAM); IPR018389 (PFAM); IPR004682 (TIGRFAM); G3DSA:3.30.420.40 (GENE3D); PTHR10196:SF10 (PANTHER); PTHR10196 (PANTHER); SSF53067 (SUPERFAMILY); SSF53850 (SUPERFAMILY)                                                                                                                                                                                                                                                                                                                                                                                                                                                                                                                                                                                                               |
| 150 | c123450_g1_i1_len_660_path_1_0_659_1                                 | 6   | lysine--trna partial                                                 | 220  | 2.19E-158 | 99.00% | 0.15  | IPR018149 (PRINTS); IPR004364 (PFAM); IPR004365 (PFAM); IPR012340 (G3DSA:2.40.50.GENE3D); G3DSA:3.30.930.10 (GENE3D); IPR018150 (PANTHER); PTHR22594:SF25 (PANTHER); IPR006195 (PROSITE_PROFILES); SSF55681 (SUPERFAMILY); IPR012340 (SUPERFAMILY)                                                                                                                                                                                                                                                                                                                                                                                                                                                                                                                                               |
| 151 | c123713_g1_i1_len_570_path_699_0_569_0                               | 25  | mucin core                                                           | 190  | 1.08E-11  | 73.50% | 0.1   | IPR007947 (PFAM); IPR007947 (PANTHER); NON_CYTOPLASMIC_DOMAIN (PHOBIUS); TRANSMEMBRANE (PHOBIUS); CYTOPLASMIC_DOMAIN (PHOBIUS); TMhelix (TMHMM)                                                                                                                                                                                                                                                                                                                                                                                                                                                                                                                                                                                                                                                  |
| 152 | c12373_g1_i1_len_152_path_25_0_151_4                                 | 4   | carboxypeptidase                                                     | 51   | 3.09E-12  | 80.30% | 0.13  | G3DSA:3.40.630.10 (GENE3D); IPR000834 (PFAM); PTHR11705 (PANTHER); SSF53187 (SUPERFAMILY)                                                                                                                                                                                                                                                                                                                                                                                                                                                                                                                                                                                                                                                                                                        |
| 153 | c12472_g1_i1_len_1168_path_44_0_1096_1141_1097_1167_5                | 14  | ---NA---                                                             | 389  |           |        | 0.118 | Coil (COILS); Coil (COILS)                                                                                                                                                                                                                                                                                                                                                                                                                                                                                                                                                                                                                                                                                                                                                                       |
| 154 | c1253_g1_i1_len_1246_path_1_0_1245_0                                 | 78  | apolipoprotein d                                                     | 416  | 1.15E-07  | 45.50% | 0.129 | IPR012674 (G3DSA:2.40.128.GENE3D); NON_CYTOPLASMIC_DOMAIN (PHOBIUS); CYTOPLASMIC_DOMAIN (PHOBIUS); TRANSMEMBRANE (PHOBIUS); IPR011038 (SUPERFAMILY)                                                                                                                                                                                                                                                                                                                                                                                                                                                                                                                                                                                                                                              |
| 155 | c12538_g1_i1_len_2147_path_1_0_1302_1304_1_303_2146_3                | 31  | peroxisomal multifunctional enzyme type 2                            | 716  | 0         | 71.90% | 0.139 | IPR002347 (PRINTS); IPR002198 (PRINTS); IPR013968 (SMART); IPR002198 (PFAM); IPR003033 (G3DSA:3.30.1050.GENE3D); IPR029069 (G3DSA:3.10.129.GENE3D); IPR016040 (G3DSA:3.40.50.GENE3D); IPR002539 (PFAM); PF13452 (PFAM); IPR029069 (G3DSA:3.10.129.GENE3D); PTHR24316 (PANTHER); PTHR24316:SF2 (PANTHER); IPR020904 (PROSITE_PATTERNS); IPR029069 (SUPERFAMILY); SSF51735 (SUPERFAMILY); IPR029069 (SUPERFAMILY)                                                                                                                                                                                                                                                                                                                                                                                  |
| 156 | c12538_g1_i2_len_2171_path_1_0_1302_4311_1_303_1326_1304_1327_2170_3 | 31  | peroxisomal multifunctional enzyme type 2                            | 724  | 0         | 72.70% | 0.139 | IPR002347 (PRINTS); IPR002198 (PRINTS); IPR013968 (SMART); PF13452 (PFAM); IPR003033 (G3DSA:3.30.1050.GENE3D); IPR029069 (G3DSA:3.10.129.GENE3D); IPR016040 (G3DSA:3.40.50.GENE3D); IPR002539 (PFAM); IPR029069 (G3DSA:3.10.129.GENE3D); IPR002198 (PFAM); PTHR24316 (PANTHER); PTHR24316:SF2 (PANTHER); IPR020904 (PROSITE_PATTERNS); IPR029069 (SUPERFAMILY); IPR029069 (SUPERFAMILY); SSF51735 (SUPERFAMILY)                                                                                                                                                                                                                                                                                                                                                                                  |
| 157 | c126362_g1_i1_len_538_path_1_0_537_1                                 | 4   | lysine--trna partial                                                 | 179  | 1.78E-128 | 99.90% | 0.155 | IPR018149 (PRINTS); IPR004365 (PFAM); IPR004364 (PFAM); IPR012340 (G3DSA:2.40.50.GENE3D); G3DSA:3.30.930.10 (GENE3D); PTHR22594:SF25 (PANTHER); IPR018150 (PANTHER); IPR006195 (PROSITE_PROFILES); IPR012340 (SUPERFAMILY); SSF55681 (SUPERFAMILY)                                                                                                                                                                                                                                                                                                                                                                                                                                                                                                                                               |

|     |                                                                                     |        |                                                    |     |           |         |         |                                                                                                                                                                                                                                                                                                                                                                                                                                                                                                                                |
|-----|-------------------------------------------------------------------------------------|--------|----------------------------------------------------|-----|-----------|---------|---------|--------------------------------------------------------------------------------------------------------------------------------------------------------------------------------------------------------------------------------------------------------------------------------------------------------------------------------------------------------------------------------------------------------------------------------------------------------------------------------------------------------------------------------|
| 158 | c12674_g1_i1_len_1465_path_1_0_1392_1394_1_393_1416_1394_1417_1440_1394_1441_1464_4 | 31     | phospholipid scramblase 2 isoform x1               | 488 | 2.50E-132 | 81.80%  | 0.101   | IPR005552 (PFAM); PTHR23248:SF26 (PANTHER); IPR005552 (PANTHER); NON_CYTOPLASMIC_DOMAIN (PHOBIUS); NON_CYTOPLASMIC_DOMAIN (PHOBIUS); CYTOPLASMIC_DOMAIN (PHOBIUS); TRANSMEMBRANE (PHOBIUS); TRANSMEMBRANE (PHOBIUS); CYTOPLASMIC_DOMAIN (PHOBIUS); NON_CYTOPLASMIC_DOMAIN (PHOBIUS); TRANSMEMBRANE (PHOBIUS); TRANSMEMBRANE (PHOBIUS); IPR025659 (SUPERFAMILY); TMhelix (TMHMM); TMhelix (TMHMM)                                                                                                                               |
| 159 | c12686_g1_i1_len_1200_path_1_0_1199_2                                               | 103249 | serine proteinase stubble                          | 393 | 5.53E-40  | 52.20%  | 0.23    | IPR001314 (PRINTS); IPR001254 (SMART); G3DSA:2.40.10.10 (GENE3D); IPR001254 (PFAM); G3DSA:2.40.10.10 (GENE3D); G3DSA:2.40.10.10 (GENE3D); PTHR24268 (PANTHER); IPR018114 (PROSITE_PATTERNS); IPR018114 (PROSITE_PATTERNS); CYTOPLASMIC_DOMAIN (PHOBIUS); NON_CYTOPLASMIC_DOMAIN (PHOBIUS); TRANSMEMBRANE (PHOBIUS); IPR001254 (PROSITE_PROFILES); IPR009003 (SUPERFAMILY)                                                                                                                                                      |
| 160 | c127139_g1_i1_len_675_path_502_0_326_829_3_27_500_829_501_674_5                     | 14     | gastrula zinc finger                               | 219 | 4.00E-36  | 53.40%  | 0.098   | IPR015880 (SMART); IPR007087 (PFAM); PF13894 (PFAM); IPR013087 (G3DSA:3.30.160.GENE3D); IPR013087 (G3DSA:3.30.160.GENE3D); PTHR24409:SF14 (PANTHER); PTHR24409 (PANTHER); IPR007087 (PROSITE_PATTERNS); IPR007087 (PROSITE_PATTERNS); IPR007087 (PROSITE_PATTERNS); IPR007087 (PROSITE_PATTERNS); IPR007087 (PROSITE_PATTERNS); IPR007087 (PROSITE_PROFILES); IPR007087 (PROSITE_PROFILES); IPR007087 (PROSITE_PROFILES); IPR007087 (PROSITE_PROFILES); SSF57667 (SUPERFAMILY); SSF57667 (SUPERFAMILY); SSF57667 (SUPERFAMILY) |
| 161 | c12730_g1_i1_len_1118_path_1_0_1117_3                                               | 143    | estradiol 17-beta-dehydrogenase 8                  | 373 | 3.86E-86  | 72.20%  | 0.12    | IPR002347 (PRINTS); IPR002198 (PRINTS); IPR016040 (G3DSA:3.40.50.GENE3D); IPR002198 (PFAM); PTHR24316 (PANTHER); PTHR24316:SF254 (PANTHER); IPR020904 (PROSITE_PATTERNS); SSF51735 (SUPERFAMILY)                                                                                                                                                                                                                                                                                                                               |
| 162 | c127669_g1_i1_len_389_path_1_0_388_1                                                | 2      | lysine--trna ligase                                | 130 | 8.40E-88  | 100.00% | 0.101   | G3DSA:3.30.930.10 (GENE3D); IPR004364 (PFAM); PTHR22594:SF25 (PANTHER); IPR018150 (PANTHER); SSF55681 (SUPERFAMILY)                                                                                                                                                                                                                                                                                                                                                                                                            |
| 163 | c127922_g1_i1_len_484_path_1_0_483_4                                                | 4      | thioredoxin                                        | 161 | 2.54E-100 | 99.60%  | 0.343 Y | PR00421 (PRINTS); IPR005746 (TIGRFAM); IPR013766 (PFAM); IPR012336 (G3DSA:3.40.30.GENE3D); PTHR10438:SF253 (PANTHER); IPR005746 (PANTHER); IPR017937 (PROSITE_PATTERNS); IPR012336 (PROSITE_PROFILES); IPR012336 (SUPERFAMILY)                                                                                                                                                                                                                                                                                                 |
| 164 | c12796_g1_i1_len_1101_path_1079_0_1100_0                                            | 35     | preproneuropeptide f i                             | 362 | 1.39E-17  | 63.88%  | 0.168   | IPR020392 (PROSITE_PATTERNS); CYTOPLASMIC_DOMAIN (PHOBIUS); NON_CYTOPLASMIC_DOMAIN (PHOBIUS); TRANSMEMBRANE (PHOBIUS); IPR001955 (PROSITE_PROFILES); TMhelix (TMHMM); TMhelix (TMHMM); TMhelix (TMHMM)                                                                                                                                                                                                                                                                                                                         |
| 165 | c12847_g1_i1_len_1341_path_1319_0_1106_242_6_1107_1107_2427_1108_1340_2             | 72     | chitinase partial                                  | 441 | 1.18E-91  | 70.20%  | 0.1     | IPR011583 (SMART); IPR002557 (SMART); IPR013781 (G3DSA:3.20.20.GENE3D); IPR001223 (PFAM); IPR002557 (PFAM); IPR002557 (G3DSA:2.170.140.GENE3D); IPR029070 (G3DSA:3.10.50.GENE3D); PTHR11177:SF112 (PANTHER); PTHR11177 (PANTHER); IPR002557 (PROSITE_PROFILES); IPR002557 (SUPERFAMILY); IPR017853 (SUPERFAMILY); IPR029070 (SUPERFAMILY)                                                                                                                                                                                      |
| 166 | c12858_g1_i1_len_241_path_169_0_240_1                                               | 13     | trypsin partial                                    | 80  | 2.19E-12  | 64.10%  | 0.106   | IPR001254 (PFAM); G3DSA:2.40.10.10 (GENE3D); G3DSA:2.40.10.10 (GENE3D); PTHR24250 (PANTHER); IPR018114 (PROSITE_PATTERNS); IPR001254 (PROSITE_PROFILES); IPR009003 (SUPERFAMILY)                                                                                                                                                                                                                                                                                                                                               |
| 167 | c12876_g1_i1_len_1384_path_2_0_1244_2844_1_245_1245_1247_1246_1383_0                | 34     | contactin associated protein 1                     | 462 | 1.65E-50  | 50.70%  | 0.101   | Coil (COILS); IPR000885 (PFAM); IPR014716 (G3DSA:3.90.215.GENE3D); PTHR10127 (PANTHER); PTHR10127:SF575 (PANTHER); IPR002181 (SUPERFAMILY)                                                                                                                                                                                                                                                                                                                                                                                     |
| 168 | c128889_g1_i1_len_279_path_1_0_278_5                                                | 2      | low quality protein: glutathione peroxidase 3-like | 93  | 5.26E-14  | 67.80%  | 0.107   | IPR012336 (G3DSA:3.40.30.GENE3D); IPR000889 (PANTHER); PTHR11592:SF21 (PANTHER); IPR000889 (PROSITE_PROFILES); IPR012336 (SUPERFAMILY)                                                                                                                                                                                                                                                                                                                                                                                         |
| 169 | c129036_g1_i1_len_694_path_672_0_693_2                                              | 4      | ---NA---                                           | 231 |           |         | 0.113   | TRANSMEMBRANE (PHOBIUS); NON_CYTOPLASMIC_DOMAIN (PHOBIUS); CYTOPLASMIC_DOMAIN (PHOBIUS); TRANSMEMBRANE (PHOBIUS); CYTOPLASMIC_DOMAIN (PHOBIUS)                                                                                                                                                                                                                                                                                                                                                                                 |
| 170 | c129414_g1_i1_len_489_path_467_0_488_1                                              | 4      | #NAME?                                             | 163 | 1.43E-52  | 81.50%  | 0.137   | IPR001830 (PFAM); G3DSA:3.40.50.2000 (GENE3D); PTHR10788:SF6 (PANTHER); PTHR10788 (PANTHER); SSF53756 (SUPERFAMILY)                                                                                                                                                                                                                                                                                                                                                                                                            |

|     |                                                                 |     |                                                           |     |           |        |         |                                                                                                                                                                                                                                                                                                                                                                                                                                                                                                                                  |
|-----|-----------------------------------------------------------------|-----|-----------------------------------------------------------|-----|-----------|--------|---------|----------------------------------------------------------------------------------------------------------------------------------------------------------------------------------------------------------------------------------------------------------------------------------------------------------------------------------------------------------------------------------------------------------------------------------------------------------------------------------------------------------------------------------|
| 171 | c129442_g1_i1_len_302_path_1_0_301_0                            | 0   | zinc c2h2 type domain-containing protein                  | 101 | 3.54E-20  | 58.50% | 0.104   | IPR015880 (SMART); IPR013087 (G3DSA:3.30.160.GENE3D); PF13912 (PFAM); PF13465 (PFAM); PF13894 (PFAM); IPR013087 (G3DSA:3.30.160.GENE3D); PTHR24409:SF14 (PANTHER); PTHR24409 (PANTHER); IPR007087 (PROSITE_PATTERNS); IPR007087 (PROSITE_PATTERNS); IPR007087 (PROSITE_PATTERNS); IPR007087 (PROSITE_PROFILES); IPR007087 (PROSITE_PROFILES); IPR007087 (PROSITE_PROFILES); SSF57667 (SUPERFAMILY); SSF57667 (SUPERFAMILY)                                                                                                       |
| 172 | c12958_g1_i1_len_2203_path_2181_0_843_3025_844_2202_2           | 72  | von willebrand factor a domain-containing protein partial | 728 | 0         | 70.80% | 0.126   | Coil (COILS); IPR002035 (SMART); PF13519 (PFAM); PTHR21610 (PANTHER); PTHR21610:SF9 (PANTHER); IPR002035 (PROSITE_PROFILES); IPR002035 (SUPERFAMILY)                                                                                                                                                                                                                                                                                                                                                                             |
| 173 | c12975_g1_i1_len_993_path_971_0_439_1411_440_441_1413_442_992_1 | 76  | tyrosine-protein kinase wsck                              | 325 | 9.66E-40  | 65.50% | 0.124   | IPR001245 (PRINTS); IPR020635 (SMART); G3DSA:1.10.510.10 (GENE3D); IPR001245 (PFAM); PTHR24418 (PANTHER); IPR000719 (PROSITE_PROFILES); IPR011009 (SUPERFAMILY)                                                                                                                                                                                                                                                                                                                                                                  |
| 174 | c13023_g1_i1_len_1229_path_1207_0_1228_0                        | 181 | transcriptional repressor protein yy1-like                | 398 | 2.38E-108 | 95.20% | 0.108   | IPR015880 (SMART); IPR013087 (G3DSA:3.30.160.GENE3D); PF13465 (PFAM); IPR013087 (G3DSA:3.30.160.GENE3D); PF13894 (PFAM); IPR013087 (G3DSA:3.30.160.GENE3D); PTHR14003:SF10 (PANTHER); PTHR14003 (PANTHER); IPR007087 (PROSITE_PATTERNS); IPR007087 (PROSITE_PATTERNS); CYTOPLASMIC_DOMAIN (PHOBIUS); NON_CYTOPLASMIC_DOMAIN (PHOBIUS); TRANSMEMBRANE (PHOBIUS); IPR007087 (PROSITE_PROFILES); IPR007087 (PROSITE_PROFILES); IPR007087 (PROSITE_PROFILES); SSF57667 (SUPERFAMILY); SSF57667 (SUPERFAMILY); SSF57667 (SUPERFAMILY) |
| 175 | c130346_g1_i1_len_464_path_442_0_463_2                          | 6   | semaphorin-1a isoform x2                                  | 154 | 7.41E-13  | 78.30% | 0.265   | IPR001627 (PFAM); IPR015943 (G3DSA:2.130.10.GENE3D); PTHR11036:SF66 (PANTHER); IPR027231 (PANTHER); CYTOPLASMIC_DOMAIN (PHOBIUS); NON_CYTOPLASMIC_DOMAIN (PHOBIUS); TRANSMEMBRANE (PHOBIUS); IPR001627 (SUPERFAMILY); TMhelix (TMHMM)                                                                                                                                                                                                                                                                                            |
| 176 | c130812_g1_i1_len_437_path_1_0_436_4                            | 4   | zinc finger                                               | 146 | 4.80E-67  | 86.10% | 0.177   | IPR015880 (SMART); PF13894 (PFAM); IPR013087 (G3DSA:3.30.160.GENE3D); IPR013087 (G3DSA:3.30.160.GENE3D); PF13465 (PFAM); PTHR24391:SF9 (PANTHER); PTHR24391 (PANTHER); IPR007087 (PROSITE_PATTERNS); IPR007087 (PROSITE_PATTERNS); IPR007087 (PROSITE_PROFILES); IPR007087 (PROSITE_PROFILES); IPR007087 (PROSITE_PROFILES); IPR007087 (PROSITE_PROFILES); SSF57667 (SUPERFAMILY); SSF57667 (SUPERFAMILY)                                                                                                                        |
| 177 | c1310_g1_i1_len_1155_path_1133_0_470_1604_471_1154_2            | 33  | low-density lipoprotein receptor-related protein 1-like   | 379 | 1.02E-08  | 72.80% | 0.106   | IPR002172 (SMART); IPR002172 (G3DSA:4.10.400.GENE3D); IPR002172 (PFAM); IPR023415 (PROSITE_PATTERNS); TRANSMEMBRANE (PHOBIUS); NON_CYTOPLASMIC_DOMAIN (PHOBIUS); TRANSMEMBRANE (PHOBIUS); CYTOPLASMIC_DOMAIN (PHOBIUS); CYTOPLASMIC_DOMAIN (PHOBIUS); NON_CYTOPLASMIC_DOMAIN (PHOBIUS); TRANSMEMBRANE (PHOBIUS); IPR002172 (PROSITE_PROFILES); IPR002172 (SUPERFAMILY); TMhelix (TMHMM); TMhelix (TMHMM); TMhelix (TMHMM); TMhelix (TMHMM)                                                                                       |
| 178 | c1310_g1_i2_len_1641_path_2265_0_956_1604_957_1640_2            | 61  | ves g 5 allergen                                          | 541 | 9.84E-46  | 52.40% | 0.574 Y | IPR002413 (PRINTS); IPR001283 (PRINTS); IPR002172 (SMART); IPR014044 (SMART); IPR014044 (PFAM); IPR014044 (G3DSA:3.40.33.GENE3D); IPR002172 (PFAM); IPR002172 (G3DSA:4.10.400.GENE3D); IPR001283 (PANTHER); IPR018244 (PROSITE_PATTERNS); IPR023415 (PROSITE_PATTERNS); IPR018244 (PROSITE_PATTERNS); TRANSMEMBRANE (PHOBIUS); CYTOPLASMIC_DOMAIN (PHOBIUS); NON_CYTOPLASMIC_DOMAIN (PHOBIUS); IPR002172 (PROSITE_PROFILES); SignalP-noTM (SIGNALP_EUK); IPR002172 (SUPERFAMILY); IPR014044 (SUPERFAMILY); TMhelix (TMHMM)       |
| 179 | c13109_g1_i1_len_977_path_125_0_743_112_744_755_124_756_976_0   | 29  | zinc metalloprotease                                      | 321 | 5.10E-10  | 60.20% | 0.205   | G3DSA:1.10.390.10 (GENE3D); TMhelix (TMHMM); TMhelix (TMHMM)                                                                                                                                                                                                                                                                                                                                                                                                                                                                     |
| 180 | c13157_g1_i1_len_736_path_762_0_123_885_124_126_25_127_735_2    | 43  | protein pygopus                                           | 237 | 1.99E-58  | 87.40% | 0.098   | IPR001965 (SMART); IPR013083 (G3DSA:3.30.40.GENE3D); IPR019787 (PFAM); PTHR23194 (PANTHER); PTHR23194:SF15 (PANTHER); IPR019786 (PROSITE_PATTERNS); TRANSMEMBRANE (PHOBIUS); NON_CYTOPLASMIC_DOMAIN (PHOBIUS); TRANSMEMBRANE (PHOBIUS); CYTOPLASMIC_DOMAIN (PHOBIUS); CYTOPLASMIC_DOMAIN (PHOBIUS); IPR019787 (PROSITE_PROFILES); IPR011011 (SUPERFAMILY)                                                                                                                                                                        |



[illegible]

|     |                                                                     |        |                                                                 |     |           |        |         |                                                                                                                                                                                                                                                                                                                                                                                                                                                                                                                                                                                                                                                                                                                                                                                                                                                                                                                                                                      |
|-----|---------------------------------------------------------------------|--------|-----------------------------------------------------------------|-----|-----------|--------|---------|----------------------------------------------------------------------------------------------------------------------------------------------------------------------------------------------------------------------------------------------------------------------------------------------------------------------------------------------------------------------------------------------------------------------------------------------------------------------------------------------------------------------------------------------------------------------------------------------------------------------------------------------------------------------------------------------------------------------------------------------------------------------------------------------------------------------------------------------------------------------------------------------------------------------------------------------------------------------|
| 188 | c13292_g1_i1_len_1084_path_49_0_448_497_449_1083_2                  | 31     | syntaxin-16 isoform x4                                          | 361 | 1.02E-104 | 70.80% | 0.155   | IPR000727 (SMART); IPR006011 (PFAM); IPR000727 (PFAM); G3DSA:1.20.58.70 (GENE3D); PTHR19957:SF83 (PANTHER); PTHR19957 (PANTHER); IPR006012 (PROSITE PATTERNS); NON_CYTOPLASMIC_DOMAIN (PHOBIUS); NON_CYTOPLASMIC_DOMAIN (PHOBIUS); TRANSMEMBRANE (PHOBIUS); CYTOPLASMIC_DOMAIN (PHOBIUS); TRANSMEMBRANE (PHOBIUS); IPR000727 (PROSITE_PROFILES); IPR010989 (SUPERFAMILY); TMhelix (TMHMM); TMhelix (TMHMM)                                                                                                                                                                                                                                                                                                                                                                                                                                                                                                                                                           |
| 189 | c13315_g1_i1_len_1882_path_1_0_1881_0                               | 135    | 4-trimethylaminobutyraldehyde partial                           | 628 | 0         | 74.30% | 0.176   | IPR015590 (PFAM); IPR016162 (G3DSA:3.40.605.GENE3D); IPR016163 (G3DSA:3.40.309.GENE3D); PTHR11699:SF114 (PANTHER); PTHR11699 (PANTHER); IPR016160 (PROSITE PATTERNS); IPR029510 (PROSITE PATTERNS); IPR016161 (SUPERFAMILY)                                                                                                                                                                                                                                                                                                                                                                                                                                                                                                                                                                                                                                                                                                                                          |
| 190 | c133397_g1_i1_len_328_path_1_0_327_0                                | 1      | parkinson disease 7 domain-containing protein 1-like isoform x1 | 105 | 1.69E-41  | 72.60% | 0.176   | IPR002818 (PFAM); IPR029062 (G3DSA:3.40.50.GENE3D); IPR029062 (SUPERFAMILY)                                                                                                                                                                                                                                                                                                                                                                                                                                                                                                                                                                                                                                                                                                                                                                                                                                                                                          |
| 191 | c13376_g1_i1_len_270_path_254_0_221_557_222_269_2                   | 0      | probable chitinase 3                                            | 90  | 1.69E-06  | 55.00% | 0.105   | Coil (COILS); IPR001223 (PFAM); IPR013781 (G3DSA:3.20.20.GENE3D); IPR017853 (SUPERFAMILY)                                                                                                                                                                                                                                                                                                                                                                                                                                                                                                                                                                                                                                                                                                                                                                                                                                                                            |
| 192 | c134251_g1_i1_len_313_path_67_0_312_0                               | 0      | tryptase partial                                                | 105 | 5.71E-06  | 56.00% | 0.145   | G3DSA:2.40.10.10 (GENE3D); IPR009003 (SUPERFAMILY)                                                                                                                                                                                                                                                                                                                                                                                                                                                                                                                                                                                                                                                                                                                                                                                                                                                                                                                   |
| 193 | c1344_g1_i1_len_1803_path_1781_0_1802_0                             | 21     | cyclin-dependent kinase 17-like isoform x1                      | 601 | 0         | 85.90% | 0.102   | IPR002290 (SMART); G3DSA:3.30.200.20 (GENE3D); G3DSA:1.10.510.10 (GENE3D); IPR000719 (PFAM); PTHR24056:SF128 (PANTHER); PTHR24056 (PANTHER); IPR008271 (PROSITE PATTERNS); IPR017441 (PROSITE PATTERNS); NON_CYTOPLASMIC_DOMAIN (PHOBIUS); CYTOPLASMIC_DOMAIN (PHOBIUS); TRANSMEMBRANE (PHOBIUS); IPR000719 (PROSITE_PROFILES); IPR011009 (SUPERFAMILY); TMhelix (TMHMM)                                                                                                                                                                                                                                                                                                                                                                                                                                                                                                                                                                                             |
| 194 | c13494_g1_i1_len_2261_path_1_0_1400_1402_1401_1402_1404_1403_2260_1 | 80     | zinc finger protein 239-like isoform x2                         | 748 | 1.25E-76  | 68.00% | 0.101   | IPR015880 (SMART); IPR013087 (G3DSA:3.30.160.GENE3D); PF13465 (PFAM); IPR013087 (G3DSA:3.30.160.GENE3D); IPR007087 (PFAM); IPR013087 (G3DSA:3.30.160.GENE3D); IPR013087 (G3DSA:3.30.160.GENE3D); PTHR24377 (PANTHER); IPR007087 (PROSITE PATTERNS); NON_CYTOPLASMIC_DOMAIN (PHOBIUS); TRANSMEMBRANE (PHOBIUS); CYTOPLASMIC_DOMAIN (PHOBIUS); TRANSMEMBRANE (PHOBIUS); CYTOPLASMIC_DOMAIN (PHOBIUS); NON_CYTOPLASMIC_DOMAIN (PHOBIUS); CYTOPLASMIC_DOMAIN (PHOBIUS); TRANSMEMBRANE (PHOBIUS); TRANSMEMBRANE (PHOBIUS); IPR007087 (PROSITE_PROFILES); IPR007087 (PROSITE_PROFILES); IPR007087 (PROSITE_PROFILES); IPR007087 (PROSITE_PROFILES); IPR007087 (PROSITE_PROFILES); SSF57667 (SUPERFAMILY); SSF57667 (SUPERFAMILY); SSF57667 (SUPERFAMILY) |
| 195 | c13501_g1_i1_len_1025_path_1_0_1024_1                               | 16     | ly6 plaur domain-containing protein 1-like                      | 335 | 1.02E-37  | 74.00% | 0.102   | G3DSA:2.10.60.10 (GENE3D); PTHR31171 (PANTHER); TRANSMEMBRANE (PHOBIUS); CYTOPLASMIC_DOMAIN (PHOBIUS); NON_CYTOPLASMIC_DOMAIN (PHOBIUS); SSF57302 (SUPERFAMILY)                                                                                                                                                                                                                                                                                                                                                                                                                                                                                                                                                                                                                                                                                                                                                                                                      |
| 196 | c135253_g1_i1_len_173_path_197_0_172_4                              | 0      | ---NA---                                                        | 58  |           |        | 0.168   | no IPS match                                                                                                                                                                                                                                                                                                                                                                                                                                                                                                                                                                                                                                                                                                                                                                                                                                                                                                                                                         |
| 197 | c13591_g1_i1_len_1321_path_1_0_1320_1                               | 3443   | ion transport peptide isoform x2                                | 440 | 4.90E-30  | 77.90% | 0.124   | IPR001166 (PRINTS); IPR000346 (PRINTS); IPR001166 (G3DSA:1.10.2010.GENE3D); IPR001166 (PFAM); IPR018251 (PROSITE PATTERNS); TRANSMEMBRANE (PHOBIUS); CYTOPLASMIC_DOMAIN (PHOBIUS); CYTOPLASMIC_DOMAIN (PHOBIUS); TRANSMEMBRANE (PHOBIUS); TRANSMEMBRANE (PHOBIUS); TRANSMEMBRANE (PHOBIUS); NON_CYTOPLASMIC_DOMAIN (PHOBIUS); CYTOPLASMIC_DOMAIN (PHOBIUS); NON_CYTOPLASMIC_DOMAIN (PHOBIUS); IPR001166 (SUPERFAMILY); TMhelix (TMHMM); TMhelix (TMHMM); TMhelix (TMHMM)                                                                                                                                                                                                                                                                                                                                                                                                                                                                                             |
| 198 | c13598_g1_i1_len_1205_path_1_0_1204_4                               | 775049 | serine protease 27-like                                         | 394 | 5.73E-42  | 55.00% | 0.438 Y | IPR001314 (PRINTS); IPR001254 (SMART); IPR001254 (PFAM); G3DSA:2.40.10.10 (GENE3D); G3DSA:2.40.10.10 (GENE3D); PTHR24268 (PANTHER); IPR018114 (PROSITE PATTERNS); IPR018114 (PROSITE PATTERNS); SIGNAL_PEPTIDE_N_REGION (PHOBIUS); NON_CYTOPLASMIC_DOMAIN (PHOBIUS); SIGNAL_PEPTIDE_H_REGION (PHOBIUS); SIGNAL_PEPTIDE_C_REGION (PHOBIUS); SIGNAL_PEPTIDE (PHOBIUS); IPR001254 (PROSITE_PROFILES); IPR009003 (SUPERFAMILY)                                                                                                                                                                                                                                                                                                                                                                                                                                                                                                                                           |

|     |                                                                          |       |                                                  |     |           |         |       |                                                                                                                                                                                                                                                                                                                                                                                                                                                                                                                                                                                                                                                                                                            |
|-----|--------------------------------------------------------------------------|-------|--------------------------------------------------|-----|-----------|---------|-------|------------------------------------------------------------------------------------------------------------------------------------------------------------------------------------------------------------------------------------------------------------------------------------------------------------------------------------------------------------------------------------------------------------------------------------------------------------------------------------------------------------------------------------------------------------------------------------------------------------------------------------------------------------------------------------------------------------|
| 199 | c13605_g1_i1_len_1660_path_1648_0_1659_2                                 | 18211 | suppressor of tumorigenicity 14 protein          | 544 | 1.38E-67  | 53.40%  | 0.17  | IPR002172 (PRINTS); IPR002172 (SMART); IPR001254 (SMART); IPR002172 (PFAM); IPR001254 (PFAM); G3DSA:2.40.10.10 (GENE3D); IPR002172 (G3DSA:4.10.400.GENE3D); IPR002172 (G3DSA:4.10.400.GENE3D); G3DSA:2.40.10.10 (GENE3D); G3DSA:2.40.10.10 (GENE3D); PTHR24256 (PANTHER); IPR018114 (PROSITE_PATTERNS); IPR023415 (PROSITE_PATTERNS); IPR023415 (PROSITE_PATTERNS); IPR018114 (PROSITE_PATTERNS); IPR023415 (PROSITE_PATTERNS); IPR002172 (PROSITE_PROFILES); IPR001254 (PROSITE_PROFILES); IPR002172 (PROSITE_PROFILES); IPR002172 (PROSITE_PROFILES); IPR002172 (SUPERFAMILY); IPR002172 (SUPERFAMILY); IPR009003 (SUPERFAMILY); IPR002172 (SUPERFAMILY)                                                 |
| 200 | c13611_g1_i1_len_2033_path_1_0_2032_3                                    | 22159 | enolase isoform x2                               | 672 | 0         | 89.70%  | 0.122 | IPR000941 (PRINTS); IPR020810 (PFAM); IPR000941 (TIGRFAM); IPR020811 (PFAM); IPR029065 (G3DSA:3.20.20.GENE3D); IPR029017 (G3DSA:3.30.390.GENE3D); IPR000941 (PANTHER); IPR020809 (PROSITE_PATTERNS); TRANSMEMBRANE (PHOBIUS); NON_CYTOPLASMIC_DOMAIN (PHOBIUS); TRANSMEMBRANE (PHOBIUS); NON_CYTOPLASMIC_DOMAIN (PHOBIUS); TRANSMEMBRANE (PHOBIUS); CYTOPLASMIC_DOMAIN (PHOBIUS); CYTOPLASMIC_DOMAIN (PHOBIUS); IPR000941 (HAMAP); IPR029065 (SUPERFAMILY); IPR029017 (SUPERFAMILY); TMhelix (TMHMM); TMhelix (TMHMM); TMhelix (TMHMM)                                                                                                                                                                     |
| 201 | c13639_g1_i1_len_534_path_642_0_423_1066_4_24_430_1073_431_533_0         | 16    | type i restriction enzyme                        | 178 | 7.35E-08  | 69.50%  | 0.112 | Coil (COILS); TMhelix (TMHMM)                                                                                                                                                                                                                                                                                                                                                                                                                                                                                                                                                                                                                                                                              |
| 202 | c136476_g1_i1_len_1172_path_1_0_1171_3                                   | 32    | 70 kda heat shock partial                        | 391 | 0         | 88.30%  | 0.1   | Coil (COILS); IPR013126 (PRINTS); IPR029047 (G3DSA:2.60.34.GENE3D); G3DSA:3.30.420.40 (GENE3D); IPR013126 (PFAM); G3DSA:3.90.640.10 (GENE3D); IPR029048 (G3DSA:1.20.1270.GENE3D); PTHR19375:SF142 (PANTHER); PTHR19375 (PANTHER); IPR029047 (SUPERFAMILY); SSF53067 (SUPERFAMILY); IPR029048 (SUPERFAMILY)                                                                                                                                                                                                                                                                                                                                                                                                 |
| 203 | c136533_g1_i1_len_1658_path_1_0_1657_0                                   | 58    | von willebrand factor like 2                     | 553 | 1.33E-14  | 41.70%  | 0.098 | IPR001007 (PROSITE_PATTERNS)                                                                                                                                                                                                                                                                                                                                                                                                                                                                                                                                                                                                                                                                               |
| 204 | c136609_g1_i1_len_984_path_1_0_983_5                                     | 16    | serine threonine-protein kinase 11               | 328 | 2.06E-103 | 74.80%  | 0.112 | IPR002290 (SMART); G3DSA:1.10.510.10 (GENE3D); IPR000719 (PFAM); PTHR24347:SF1 (PANTHER); IPR020636 (PANTHER); IPR008271 (PROSITE_PATTERNS); CYTOPLASMIC_DOMAIN (PHOBIUS); TRANSMEMBRANE (PHOBIUS); NON_CYTOPLASMIC_DOMAIN (PHOBIUS); IPR000719 (PROSITE_PROFILES); IPR011009 (SUPERFAMILY)                                                                                                                                                                                                                                                                                                                                                                                                                |
| 205 | c136637_g1_i1_len_311_path_289_0_310_0                                   | 9301  | chitinase 2                                      | 104 | 6.50E-16  | 73.90%  | 0.12  | IPR001223 (PFAM); IPR013781 (G3DSA:3.20.20.GENE3D); PTHR11177 (PANTHER); NON_CYTOPLASMIC_DOMAIN (PHOBIUS); CYTOPLASMIC_DOMAIN (PHOBIUS); TRANSMEMBRANE (PHOBIUS); IPR017853 (SUPERFAMILY); TMhelix (TMHMM)                                                                                                                                                                                                                                                                                                                                                                                                                                                                                                 |
| 206 | c136668_g1_i1_len_2176_path_2154_0_2175_1                                | 45    | neural cell adhesion molecule 1-b                | 719 | 2.50E-71  | 57.20%  | 0.107 | IPR003599 (SMART); IPR003598 (SMART); IPR003961 (SMART); IPR003961 (PFAM); IPR013783 (G3DSA:2.60.40.GENE3D); IPR013098 (PFAM); IPR013783 (G3DSA:2.60.40.GENE3D); PTHR19831:SF48 (PANTHER); PTHR19831 (PANTHER); NON_CYTOPLASMIC_DOMAIN (PHOBIUS); NON_CYTOPLASMIC_DOMAIN (PHOBIUS); NON_CYTOPLASMIC_DOMAIN (PHOBIUS); TRANSMEMBRANE (PHOBIUS); TRANSMEMBRANE (PHOBIUS); TRANSMEMBRANE (PHOBIUS); CYTOPLASMIC_DOMAIN (PHOBIUS); CYTOPLASMIC_DOMAIN (PHOBIUS); TRANSMEMBRANE (PHOBIUS); IPR007110 (PROSITE_PROFILES); IPR007110 (PROSITE_PROFILES); IPR003961 (PROSITE_PROFILES); SSF48726 (SUPERFAMILY); SSF48726 (SUPERFAMILY); IPR003961 (SUPERFAMILY); TMhelix (TMHMM); TMhelix (TMHMM); TMhelix (TMHMM) |
| 207 | c13674_g1_i1_len_1130_path_31_0_110_30_111_174_30_175_238_204_239_1129_5 | 9     | protein twisted gastrulation                     | 376 | 4.39E-68  | 74.80%  | 0.1   | IPR006761 (PFAM); IPR006761 (PANTHER); PTHR12312:SF15 (PANTHER)                                                                                                                                                                                                                                                                                                                                                                                                                                                                                                                                                                                                                                            |
| 208 | c136777_g1_i1_len_579_path_557_0_578_4                                   | 6     | hth-type transcriptional regulator malt          | 193 | 2.59E-72  | 100.00% | 0.112 | no IPS match                                                                                                                                                                                                                                                                                                                                                                                                                                                                                                                                                                                                                                                                                               |
| 209 | c136814_g1_i1_len_1623_path_1601_0_1622_1                                | 117   | acetylcholine receptor subunit alpha-type acr-16 | 535 | 6.06E-112 | 59.90%  | 0.171 | IPR006201 (PRINTS); IPR006029 (PFAM); IPR006202 (G3DSA:2.70.170.GENE3D); IPR027361 (G3DSA:1.20.120.GENE3D); IPR006202 (PFAM); PTHR18945:SF490 (PANTHER); IPR006201 (PANTHER); CYTOPLASMIC_DOMAIN (PHOBIUS); NON_CYTOPLASMIC_DOMAIN (PHOBIUS); TRANSMEMBRANE (PHOBIUS); CYTOPLASMIC_DOMAIN (PHOBIUS); TRANSMEMBRANE (PHOBIUS); TRANSMEMBRANE (PHOBIUS); TRANSMEMBRANE (PHOBIUS); CYTOPLASMIC_DOMAIN (PHOBIUS); NON_CYTOPLASMIC_DOMAIN (PHOBIUS); IPR006029 (SUPERFAMILY); IPR006202 (SUPERFAMILY); TMhelix (TMHMM); TMhelix (TMHMM); TMhelix (TMHMM); TMhelix (TMHMM)                                                                                                                                       |



[illegible]



|     |                                                                      |    |                                                          |     |           |        |         |                                                                                                                                                                                                                                                                                                                                                                                                                                                                                                                                                                                                                                                                                                                                                                                                                                                                                    |
|-----|----------------------------------------------------------------------|----|----------------------------------------------------------|-----|-----------|--------|---------|------------------------------------------------------------------------------------------------------------------------------------------------------------------------------------------------------------------------------------------------------------------------------------------------------------------------------------------------------------------------------------------------------------------------------------------------------------------------------------------------------------------------------------------------------------------------------------------------------------------------------------------------------------------------------------------------------------------------------------------------------------------------------------------------------------------------------------------------------------------------------------|
| 229 | c137924_g1_i1_len_853_path_831_0_852_1                               | 16 | krueppel-like factor 5                                   | 284 | 3.06E-46  | 96.20% | 0.108   | IPR015880 (SMART); IPR013087 (G3DSA:3.30.160.GENE3D); PF13465 (PFAM); IPR013087 (G3DSA:3.30.160.GENE3D); IPR013087 (G3DSA:3.30.160.GENE3D); PTHR23223 (PANTHER); IPR007087 (PROSITE_PATTERNS); IPR007087 (PROSITE_PATTERNS); IPR007087 (PROSITE_PROFILES); IPR007087 (PROSITE_PROFILES); IPR007087 (PROSITE_PROFILES); SSF57667 (SUPERFAMILY)                                                                                                                                                                                                                                                                                                                                                                                                                                                                                                                                      |
| 230 | c13799_g1_i1_len_2238_path_1_0_1469_1471_1_470_1604_1606_1605_2237_5 | 46 | nephrin isoform x1                                       | 746 | 1.25E-158 | 65.40% | 0.101   | IPR003599 (SMART); IPR003598 (SMART); IPR013783 (G3DSA:2.60.40.GENE3D); IPR013783 (G3DSA:2.60.40.GENE3D); IPR013783 (G3DSA:2.60.40.GENE3D); IPR013098 (PFAM); IPR013162 (PFAM); PTHR11640:SF31 (PANTHER); PTHR11640 (PANTHER); IPR007110 (PROSITE_PROFILES); IPR007110 (PROSITE_PROFILES); IPR007110 (PROSITE_PROFILES); IPR007110 (PROSITE_PROFILES); IPR007110 (PROSITE_PROFILES); SSF48726 (SUPERFAMILY); SSF48726 (SUPERFAMILY); SSF48726 (SUPERFAMILY); SSF48726 (SUPERFAMILY)                                                                                                                                                                                                                                                                                                                                                                                                |
| 231 | c13799_g1_i2_len_2103_path_1_0_1469_1606_1_470_2102_5                | 43 | nephrin isoform x1                                       | 701 | 1.27E-135 | 64.80% | 0.101   | IPR003599 (SMART); IPR003598 (SMART); IPR013783 (G3DSA:2.60.40.GENE3D); IPR013783 (G3DSA:2.60.40.GENE3D); IPR013783 (G3DSA:2.60.40.GENE3D); IPR013098 (PFAM); IPR013098 (PFAM); PTHR11640:SF31 (PANTHER); PTHR11640 (PANTHER); IPR007110 (PROSITE_PROFILES); IPR007110 (PROSITE_PROFILES); IPR007110 (PROSITE_PROFILES); IPR007110 (PROSITE_PROFILES); SSF48726 (SUPERFAMILY); SSF48726 (SUPERFAMILY); SSF48726 (SUPERFAMILY); SSF48726 (SUPERFAMILY)                                                                                                                                                                                                                                                                                                                                                                                                                              |
| 232 | c138092_g1_i1_len_302_path_280_0_301_3                               | 2  | plexin- partial                                          | 101 | 2.28E-46  | 86.50% | 0.107   | IPR001627 (PFAM); IPR015943 (G3DSA:2.130.10.GENE3D); PTHR22625:SF16 (PANTHER); PTHR22625 (PANTHER); IPR001627 (PROSITE_PROFILES); IPR001627 (SUPERFAMILY)                                                                                                                                                                                                                                                                                                                                                                                                                                                                                                                                                                                                                                                                                                                          |
| 233 | c13811_g1_i1_len_601_path_1_0_559_1242_560_574_607_575_600_1         | 46 | vp302_lycmc ame: full=venom protein 302 flags: precursor | 200 | 2.45E-14  | 55.80% | 0.718 Y | PTHR14186:SF8 (PANTHER); IPR011390 (PANTHER); SIGNAL_PEPTIDE_C_REGION (PHOBIUS); SIGNAL_PEPTIDE (PHOBIUS); SIGNAL_PEPTIDE_N_REGION (PHOBIUS); NON_CYTOPLASMIC_DOMAIN (PHOBIUS); SIGNAL_PEPTIDE_H_REGION (PHOBIUS); IPR000867 (PROSITE_PROFILES); SignalP-noTM (SIGNALP_EUK); SignalP-TM (SIGNALP_GRAM_POSITIVE); IPR009030 (SUPERFAMILY)                                                                                                                                                                                                                                                                                                                                                                                                                                                                                                                                           |
| 234 | c13811_g1_i2_len_632_path_1_0_559_561_560_605_607_606_631_1          | 55 | vp302_lycmc ame: full=venom protein 302 flags: precursor | 211 | 2.43E-14  | 56.00% | 0.718 Y | PTHR14186:SF8 (PANTHER); IPR011390 (PANTHER); SIGNAL_PEPTIDE_H_REGION (PHOBIUS); SIGNAL_PEPTIDE (PHOBIUS); SIGNAL_PEPTIDE_N_REGION (PHOBIUS); SIGNAL_PEPTIDE_C_REGION (PHOBIUS); NON_CYTOPLASMIC_DOMAIN (PHOBIUS); IPR000867 (PROSITE_PROFILES); SignalP-TM (SIGNALP_GRAM_POSITIVE); SignalP-noTM (SIGNALP_EUK); IPR009030 (SUPERFAMILY)                                                                                                                                                                                                                                                                                                                                                                                                                                                                                                                                           |
| 235 | c138187_g1_i1_len_742_path_1_0_741_5                                 | 8  | leukotriene a-4 hydrolase                                | 247 | 1.98E-106 | 76.80% | 0.096   | IPR014782 (PRINTS); IPR014782 (PFAM); IPR001930 (PANTHER); PTHR11533:SF4 (PANTHER); SSF63737 (SUPERFAMILY); SSF55486 (SUPERFAMILY)                                                                                                                                                                                                                                                                                                                                                                                                                                                                                                                                                                                                                                                                                                                                                 |
| 236 | c13837_g1_i1_len_529_path_1_0_528_2                                  | 9  | tyrosine-protein kinase dnt                              | 176 | 6.67E-44  | 88.00% | 0.399 Y | IPR001245 (PRINTS); G3DSA:1.10.510.10 (GENE3D); IPR001245 (PFAM); PTHR24416 (PANTHER); PTHR24416:SF302 (PANTHER); IPR000719 (PROSITE_PROFILES); IPR011009 (SUPERFAMILY)                                                                                                                                                                                                                                                                                                                                                                                                                                                                                                                                                                                                                                                                                                            |
| 237 | c138408_g1_i1_len_1460_path_1438_0_1459_2                            | 39 | zinc finger protein 271-like                             | 480 | 1.97E-63  | 66.30% | 0.097   | IPR015880 (SMART); IPR013087 (G3DSA:3.30.160.GENE3D); IPR007087 (PFAM); IPR013087 (G3DSA:3.30.160.GENE3D); IPR013087 (G3DSA:3.30.160.GENE3D); PF13465 (PFAM); PTHR24409 (PANTHER); IPR007087 (PROSITE_PATTERNS); IPR007087 (PROSITE_PATTERNS); IPR007087 (PROSITE_PATTERNS); IPR007087 (PROSITE_PATTERNS); IPR007087 (PROSITE_PATTERNS); IPR007087 (PROSITE_PATTERNS); CYTOPLASMIC_DOMAIN (PHOBIUS); TRANSMEMBRANE (PHOBIUS); CYTOPLASMIC_DOMAIN (PHOBIUS); TRANSMEMBRANE (PHOBIUS); NON_CYTOPLASMIC_DOMAIN (PHOBIUS); NON_CYTOPLASMIC_DOMAIN (PHOBIUS); TRANSMEMBRANE (PHOBIUS); IPR007087 (PROSITE_PROFILES); IPR007087 (PROSITE_PROFILES); IPR007087 (PROSITE_PROFILES); IPR007087 (PROSITE_PROFILES); IPR007087 (PROSITE_PROFILES); SSF57667 (SUPERFAMILY); SSF57667 (SUPERFAMILY); SSF57667 (SUPERFAMILY); TMhelix (TMHMM); TMhelix (TMHMM); TMhelix (TMHMM); TMhelix (TMHMM) |
| 238 | c138539_g2_i1_len_194_path_420_0_193_1                               | 0  | hypothetical protein Y032_0001g415                       | 65  | 1.09E-08  | 64.50% | 0.1     | no IPS match                                                                                                                                                                                                                                                                                                                                                                                                                                                                                                                                                                                                                                                                                                                                                                                                                                                                       |

|     |                                           |     |                                                                     |     |           |         |       |                                                                                                                                                                                                                                                                                                                                                                                                                                                                                                                                                                                                                                                                                                                      |
|-----|-------------------------------------------|-----|---------------------------------------------------------------------|-----|-----------|---------|-------|----------------------------------------------------------------------------------------------------------------------------------------------------------------------------------------------------------------------------------------------------------------------------------------------------------------------------------------------------------------------------------------------------------------------------------------------------------------------------------------------------------------------------------------------------------------------------------------------------------------------------------------------------------------------------------------------------------------------|
| 239 | c138695_g1_i1_len_1209_path_1_0_1208_3    | 17  | zinc finger                                                         | 403 | 6.36E-16  | 47.70%  | 0.104 | IPR015880 (SMART); IPR007087 (PFAM); PF13894 (PFAM); IPR013087 (G3DSA:3.30.160.GENE3D); PTHR24375:SF106 (PANTHER); PTHR24375 (PANTHER); IPR007087 (PROSITE_PATTERNS); IPR007087 (PROSITE_PATTERNS); IPR007087 (PROSITE_PATTERNS); IPR007087 (PROSITE_PATTERNS); IPR007087 (PROSITE_PATTERNS); IPR007087 (PROSITE_PATTERNS); NON_CYTOPLASMIC_DOMAIN (PHOBIUS); CYTOPLASMIC_DOMAIN (PHOBIUS); TRANSMEMBRANE (PHOBIUS); IPR007087 (PROSITE_PROFILES); IPR007087 (PROSITE_PROFILES); IPR007087 (PROSITE_PROFILES); SSF57667 (SUPERFAMILY); SSF57667 (SUPERFAMILY)                                                                                                                                                        |
| 240 | c138874_g1_i1_len_1266_path_1244_0_1265_3 | 28  | melanopsin-like isoform x1                                          | 422 | 2.05E-78  | 60.90%  | 0.121 | IPR000276 (PRINTS); IPR000276 (PFAM); G3DSA:1.20.1070.10 (GENE3D); PTHR24242 (PANTHER); PTHR24242:SF154 (PANTHER); NON_CYTOPLASMIC_DOMAIN (PHOBIUS); TRANSMEMBRANE (PHOBIUS); TRANSMEMBRANE (PHOBIUS); CYTOPLASMIC_DOMAIN (PHOBIUS); NON_CYTOPLASMIC_DOMAIN (PHOBIUS); CYTOPLASMIC_DOMAIN (PHOBIUS); TRANSMEMBRANE (PHOBIUS); TRANSMEMBRANE (PHOBIUS); TRANSMEMBRANE (PHOBIUS); NON_CYTOPLASMIC_DOMAIN (PHOBIUS); TRANSMEMBRANE (PHOBIUS); NON_CYTOPLASMIC_DOMAIN (PHOBIUS); IPR017452 (PROSITE_PROFILES); SSF81321 (SUPERFAMILY); TMhelix (TMHMM); TMhelix (TMHMM); TMhelix (TMHMM); TMhelix (TMHMM); TMhelix (TMHMM)                                                                                               |
| 241 | c138901_g1_i1_len_1314_path_1_0_1313_2    | 59  | internalin a                                                        | 438 | 3.81E-126 | 68.50%  | 0.109 | SM00364 (SMART); IPR003591 (SMART); IPR001611 (PFAM); IPR025875 (PFAM); IPR001611 (PFAM); G3DSA:3.80.10.10 (GENE3D); PTHR23155:SF408 (PANTHER); PTHR23155 (PANTHER); IPR001611 (PROSITE_PROFILES); IPR001611 (PROSITE_PROFILES); IPR001611 (PROSITE_PROFILES); IPR001611 (PROSITE_PROFILES); IPR001611 (PROSITE_PROFILES); IPR001611 (PROSITE_PROFILES); SSF52058 (SUPERFAMILY)                                                                                                                                                                                                                                                                                                                                      |
| 242 | c138982_g1_i1_len_2375_path_2353_0_2374_1 | 208 | wd repeat-containing protein 82                                     | 786 | 0         | 94.80%  | 0.15  | IPR001680 (SMART); IPR001680 (PFAM); IPR015943 (G3DSA:2.130.10.GENE3D); PTHR19861 (PANTHER); PTHR19861:SF2 (PANTHER); IPR019775 (PROSITE_PATTERNS); TRANSMEMBRANE (PHOBIUS); CYTOPLASMIC_DOMAIN (PHOBIUS); TRANSMEMBRANE (PHOBIUS); TRANSMEMBRANE (PHOBIUS); CYTOPLASMIC_DOMAIN (PHOBIUS); NON_CYTOPLASMIC_DOMAIN (PHOBIUS); TRANSMEMBRANE (PHOBIUS); TRANSMEMBRANE (PHOBIUS); NON_CYTOPLASMIC_DOMAIN (PHOBIUS); CYTOPLASMIC_DOMAIN (PHOBIUS); NON_CYTOPLASMIC_DOMAIN (PHOBIUS); IPR001680 (PROSITE_PROFILES); IPR001680 (PROSITE_PROFILES); IPR017986 (PROSITE_PROFILES); IPR001680 (PROSITE_PROFILES); IPR017986 (SUPERFAMILY); TMhelix (TMHMM); TMhelix (TMHMM); TMhelix (TMHMM)                                  |
| 243 | c139006_g1_i1_len_1369_path_1_0_1368_2    | 64  | beta-galactosidase and hygromycin phosphotransferase fusion protein | 456 | 0         | 100.00% | 0.113 | IPR006101 (PRINTS); IPR006104 (PFAM); IPR013812 (G3DSA:2.60.40.GENE3D); IPR006102 (PFAM); IPR006103 (PFAM); IPR008979 (G3DSA:2.60.120.GENE3D); IPR013781 (G3DSA:3.20.20.GENE3D); PTHR10066:SF57 (PANTHER); PTHR10066 (PANTHER); IPR023230 (PROSITE_PATTERNS); IPR023232 (PROSITE_PATTERNS); IPR006102 (SUPERFAMILY); IPR008979 (SUPERFAMILY); IPR017853 (SUPERFAMILY)                                                                                                                                                                                                                                                                                                                                                |
| 244 | c139125_g1_i1_len_1454_path_1432_0_1453_0 | 23  | endoplasmic reticulum mannosyl-oligosaccharide - alpha-mannosidase  | 485 | 3.88E-135 | 81.30%  | 0.105 | IPR001382 (PRINTS); IPR001382 (G3DSA:1.50.10.GENE3D); IPR001382 (PFAM); PTHR11742:SF7 (PANTHER); IPR001382 (PANTHER); IPR001382 (SUPERFAMILY)                                                                                                                                                                                                                                                                                                                                                                                                                                                                                                                                                                        |
| 245 | c139137_g1_i1_len_1934_path_1912_0_1933_3 | 32  | cgmp-dependent protein isozyme 2 forms cd4 t1 t3a t3b               | 645 | 0         | 91.30%  | 0.115 | Coil (COILS); IPR002374 (PRINTS); IPR000961 (SMART); IPR002290 (SMART); IPR000595 (SMART); IPR014710 (G3DSA:2.60.120.GENE3D); G3DSA:1.10.510.10 (GENE3D); IPR002374 (PIRSF); IPR000595 (PFAM); IPR000719 (PFAM); IPR014710 (G3DSA:2.60.120.GENE3D); G3DSA:3.30.200.20 (GENE3D); PTHR24353:SF65 (PANTHER); PTHR24353 (PANTHER); IPR008271 (PROSITE_PATTERNS); IPR018488 (PROSITE_PATTERNS); IPR017441 (PROSITE_PATTERNS); IPR018488 (PROSITE_PATTERNS); IPR018488 (PROSITE_PATTERNS); IPR018488 (PROSITE_PATTERNS); IPR000595 (PROSITE_PROFILES); IPR000595 (PROSITE_PROFILES); IPR000961 (PROSITE_PROFILES); IPR000719 (PROSITE_PROFILES); IPR011009 (SUPERFAMILY); IPR018490 (SUPERFAMILY); IPR018490 (SUPERFAMILY) |

|     |                                                              |    |                                                                                   |     |           |        |         |                                                                                                                                                                                                                                                                                                                                                                                                                           |
|-----|--------------------------------------------------------------|----|-----------------------------------------------------------------------------------|-----|-----------|--------|---------|---------------------------------------------------------------------------------------------------------------------------------------------------------------------------------------------------------------------------------------------------------------------------------------------------------------------------------------------------------------------------------------------------------------------------|
| 246 | c13944_g2_i1_len_301_path_1_0_300_5                          | 2  | protein p21-like                                                                  | 100 | 6.59E-35  | 96.30% | 0.099   | IPR001938 (SMART); IPR001938 (G3DSA:2.60.110.GENE3D); IPR001938 (PFAM); IPR001938 (PANTHER); IPR001938 (PROSITE_PROFILES); IPR001938 (SUPERFAMILY)                                                                                                                                                                                                                                                                        |
| 247 | c139731_g1_i1_len_562_path_6_0_453_460_454_507_460_508_561_2 | 16 | hypothetical protein                                                              | 182 | 8.29E-09  | 57.00% | 0.148   | no IPS match                                                                                                                                                                                                                                                                                                                                                                                                              |
| 248 | c139783_g1_i1_len_1150_path_1_0_1149_4                       | 32 | nardilysin-like isoform x2                                                        | 383 | 3.16E-98  | 66.00% | 0.266   | IPR011237 (G3DSA:3.30.830.GENE3D); IPR007863 (PFAM); IPR011237 (G3DSA:3.30.830.GENE3D); PTHR11851:SF108 (PANTHER); PTHR11851 (PANTHER); IPR011249 (SUPERFAMILY); IPR011249 (SUPERFAMILY)                                                                                                                                                                                                                                  |
| 249 | c139846_g1_i1_len_1208_path_1_0_1207_0                       | 19 | plasma alpha-l-fucosidase                                                         | 398 | 8.65E-63  | 81.40% | 0.746 Y | IPR016286 (PRINTS); IPR000933 (SMART); IPR013781 (G3DSA:3.20.20.GENE3D); IPR000933 (PFAM); IPR000933 (PANTHER); PTHR10030:SF26 (PANTHER); SIGNAL_PEPTIDE (PHOBIUS); SIGNAL_PEPTIDE_C_REGION (PHOBIUS); CYTOPLASMIC_DOMAIN (PHOBIUS); SIGNAL_PEPTIDE_N_REGION (PHOBIUS); SIGNAL_PEPTIDE_H_REGION (PHOBIUS); NON_CYTOPLASMIC_DOMAIN (PHOBIUS); TRANSMEMBRANE (PHOBIUS); SignalP-noTM (SIGNALP_EUK); IPR017853 (SUPERFAMILY) |
| 250 | c139882_g1_i1_len_671_path_649_0_670_2                       | 10 | angiopoietin-2-like isoform x4                                                    | 223 | 2.05E-09  | 60.90% | 0.117   | IPR002181 (SMART); IPR014716 (G3DSA:3.90.215.GENE3D); IPR002181 (PFAM); PTHR19143 (PANTHER); IPR002181 (SUPERFAMILY)                                                                                                                                                                                                                                                                                                      |
| 251 | c140090_g1_i1_len_461_path_439_0_460_1                       | 5  | exocyst complex component 6                                                       | 154 | 2.39E-80  | 80.60% | 0.205   | IPR007225 (PANTHER)                                                                                                                                                                                                                                                                                                                                                                                                       |
| 252 | c14066_g1_i1_len_250_path_1_0_249_3                          | 0  | draper splice variant 1                                                           | 84  | 2.43E-19  | 66.70% | 0.103   | G3DSA:2.170.300.10 (GENE3D); PTHR24035 (PANTHER); IPR013032 (PROSITE_PATTERNS); IPR000742 (PROSITE_PROFILES)                                                                                                                                                                                                                                                                                                              |
| 253 | c14066_g2_i1_len_338_path_455_0_337_5                        | 3  | multiple epidermal growth factor-like domains protein 10 isoform x1               | 112 | 1.56E-34  | 68.30% | 0.11    | PR00011 (PRINTS); IPR002049 (SMART); IPR002049 (PFAM); IPR013032 (PFAM); G3DSA:2.170.300.10 (GENE3D); PTHR24035 (PANTHER); IPR013032 (PROSITE_PATTERNS); IPR013032 (PROSITE_PATTERNS); IPR000742 (PROSITE_PROFILES); IPR000742 (PROSITE_PROFILES); SSF57196 (SUPERFAMILY)                                                                                                                                                 |
| 254 | c140765_g1_i1_len_1477_path_1465_0_1476_4                    | 56 | vanin-like protein 1                                                              | 485 | 4.58E-38  | 52.20% | 0.156   | IPR003010 (G3DSA:3.60.110.GENE3D); IPR003010 (PFAM); IPR012101 (PANTHER); TRANSMEMBRANE (PHOBIUS); NON_CYTOPLASMIC_DOMAIN (PHOBIUS); TRANSMEMBRANE (PHOBIUS); CYTOPLASMIC_DOMAIN (PHOBIUS); CYTOPLASMIC_DOMAIN (PHOBIUS); IPR003010 (PROSITE_PROFILES); IPR003010 (SUPERFAMILY)                                                                                                                                           |
| 255 | c140847_g1_i1_len_1232_path_1210_0_1231_1                    | 26 | nas-15 protein                                                                    | 411 | 1.20E-44  | 60.10% | 0.119   | IPR001506 (PRINTS); IPR006026 (SMART); IPR024079 (G3DSA:3.40.390.GENE3D); IPR001506 (PFAM); PTHR10127 (PANTHER); TRANSMEMBRANE (PHOBIUS); CYTOPLASMIC_DOMAIN (PHOBIUS); NON_CYTOPLASMIC_DOMAIN (PHOBIUS); SSF55486 (SUPERFAMILY)                                                                                                                                                                                          |
| 256 | c140903_g1_i1_len_995_path_3_0_994_1                         | 5  | ---NA---                                                                          | 332 |           |        | 0.11    | Coil (COILS)                                                                                                                                                                                                                                                                                                                                                                                                              |
| 257 | c140903_g1_i1_len_995_path_3_0_994_2                         | 5  | ---NA---                                                                          | 331 |           |        | 0.115   | Coil (COILS)                                                                                                                                                                                                                                                                                                                                                                                                              |
| 258 | c140964_g1_i1_len_1196_path_1_0_1195_0                       | 53 | endonuclease mitochondrial                                                        | 393 | 1.24E-127 | 83.80% | 0.15    | IPR020821 (SMART); IPR001604 (SMART); IPR020821 (G3DSA:3.40.570.GENE3D); IPR001604 (PFAM); PTHR13966 (PANTHER); IPR018524 (PROSITE_PATTERNS); SSF54060 (SUPERFAMILY)                                                                                                                                                                                                                                                      |
| 259 | c140993_g1_i1_len_723_path_701_0_722_2                       | 7  | alpha-amylase                                                                     | 241 | 1.31E-174 | 99.00% | 0.108   | IPR013781 (G3DSA:3.20.20.GENE3D); IPR006047 (PFAM); IPR017853 (SUPERFAMILY)                                                                                                                                                                                                                                                                                                                                               |
| 260 | c14110_g2_i1_len_312_path_795_0_287_1083_2_88_311_0          | 2  | type iii restriction endonuclease subunit m                                       | 104 | 7.86E-08  | 62.80% | 0.115   | no IPS match                                                                                                                                                                                                                                                                                                                                                                                                              |
| 261 | c141152_g1_i1_len_863_path_841_0_862_1                       | 12 | ---NA---                                                                          | 288 |           |        | 0.488 Y | IPR003961 (SMART); IPR013783 (G3DSA:2.60.40.GENE3D); IPR003961 (PFAM); IPR003961 (PROSITE_PROFILES); SignalP-noTM (SIGNALP_EUK); IPR003961 (SUPERFAMILY)                                                                                                                                                                                                                                                                  |
| 262 | c141442_g1_i1_len_822_path_1_0_821_5                         | 14 | prostaglandin f synthase-like isoform x4                                          | 274 | 1.12E-85  | 72.80% | 0.115   | IPR020471 (PRINTS); IPR023210 (PFAM); IPR020471 (PIRSF); IPR023210 (G3DSA:3.20.20.GENE3D); PTHR11732:SF133 (PANTHER); IPR001395 (PANTHER); IPR018170 (PROSITE_PATTERNS); IPR023210 (SUPERFAMILY)                                                                                                                                                                                                                          |
| 263 | c141597_g1_i1_len_497_path_1_0_496_0                         | 5  | acid sphingomyelinase-like phosphodiesterase partial                              | 166 | 4.54E-14  | 54.25% | 0.098   | PTHR10340 (PANTHER)                                                                                                                                                                                                                                                                                                                                                                                                       |
| 264 | c141669_g1_i1_len_767_path_745_0_766_2                       | 13 | trypsin 3                                                                         | 255 | 2.52E-33  | 63.80% | 0.179   | IPR001314 (PRINTS); IPR001254 (SMART); G3DSA:2.40.10.10 (GENE3D); IPR001254 (PFAM); PTHR24260 (PANTHER); TRANSMEMBRANE (PHOBIUS); CYTOPLASMIC_DOMAIN (PHOBIUS); NON_CYTOPLASMIC_DOMAIN (PHOBIUS); CYTOPLASMIC_DOMAIN (PHOBIUS); TRANSMEMBRANE (PHOBIUS); IPR001254 (PROSITE_PROFILES); IPR009003 (SUPERFAMILY); TMhelix (TMHMM); TMhelix (TMHMM)                                                                          |
| 265 | c141689_g1_i1_len_491_path_469_0_490_2                       | 6  | gels_homam ame: full= cytoplasmic ame: full=actin-depolymerizing factor short=adf | 163 | 8.18E-49  | 78.50% | 0.2     | IPR007122 (PRINTS); IPR007122 (SMART); IPR029006 (G3DSA:3.40.20.GENE3D); IPR007123 (PFAM); IPR007122 (PANTHER); SSF55753 (SUPERFAMILY)                                                                                                                                                                                                                                                                                    |

|     |                                                                  |     |                                                                                |     |           |        |         |                                                                                                                                                                                                                                                                                                                                                                                                                                                                                                                |
|-----|------------------------------------------------------------------|-----|--------------------------------------------------------------------------------|-----|-----------|--------|---------|----------------------------------------------------------------------------------------------------------------------------------------------------------------------------------------------------------------------------------------------------------------------------------------------------------------------------------------------------------------------------------------------------------------------------------------------------------------------------------------------------------------|
| 266 | c141855_g1_i1_len_872_path_1_0_871_4                             | 4   | nad binding domain of 6-phosphogluconate dehydrogenase family protein          | 291 | 3.28E-165 | 99.00% | 0.117   | IPR016040 (G3DSA:3.40.50.GENE3D); IPR029154 (PFAM); IPR015815 (PIRSF); IPR006115 (PFAM); IPR013328 (G3DSA:1.10.1040.GENE3D); PTHR22981 (PANTHER); SSF51735 (SUPERFAMILY); IPR008927 (SUPERFAMILY)                                                                                                                                                                                                                                                                                                              |
| 267 | c142079_g1_i1_len_518_path_496_0_517_0                           | 5   | furin-like protease isoform 1-crr isoform x2                                   | 173 | 2.95E-16  | 45.70% | 0.099   | G3DSA:2.10.220.10 (GENE3D); IPR009030 (SUPERFAMILY)                                                                                                                                                                                                                                                                                                                                                                                                                                                            |
| 268 | c142207_g1_i1_len_639_path_1_0_638_3                             | 19  | secreted salivary gland                                                        | 213 | 3.20E-10  | 70.80% | 0.168   | G3DSA:2.40.10.10 (GENE3D); IPR001254 (PFAM); PTHR24268:SF85 (PANTHER); PTHR24268 (PANTHER); NON_CYTOPLASMIC_DOMAIN (PHOBIUS); CYTOPLASMIC_DOMAIN (PHOBIUS); TRANSMEMBRANE (PHOBIUS); IPR001254 (PROSITE_PROFILES); IPR009003 (SUPERFAMILY)                                                                                                                                                                                                                                                                     |
| 269 | c142266_g1_i1_len_851_path_860_0_850_0                           | 24  | ---NA---                                                                       | 284 |           |        | 0.161   | TRANSMEMBRANE (PHOBIUS); CYTOPLASMIC_DOMAIN (PHOBIUS); NON_CYTOPLASMIC_DOMAIN (PHOBIUS)                                                                                                                                                                                                                                                                                                                                                                                                                        |
| 270 | c142266_g1_i1_len_851_path_860_0_850_1                           | 24  | ---NA---                                                                       | 284 |           |        | 0.312   | no IPS match                                                                                                                                                                                                                                                                                                                                                                                                                                                                                                   |
| 271 | c142266_g1_i1_len_851_path_860_0_850_2                           | 24  | ---NA---                                                                       | 283 |           |        | 0.356 Y | no IPS match                                                                                                                                                                                                                                                                                                                                                                                                                                                                                                   |
| 272 | c142337_g1_i1_len_1033_path_1_0_1032_2                           | 28  | sortilin-related receptor                                                      | 344 | 3.35E-137 | 73.70% | 0.124   | IPR000033 (SMART); IPR002172 (SMART); G3DSA:2.10.25.10 (GENE3D); IPR000033 (PFAM); IPR002172 (G3DSA:4.10.400.GENE3D); IPR002172 (PFAM); IPR011042 (G3DSA:2.120.10.GENE3D); PTHR12106:SF7 (PANTHER); PTHR12106 (PANTHER); IPR000033 (PROSITE_PROFILES); IPR000033 (PROSITE_PROFILES); IPR000033 (PROSITE_PROFILES); IPR000033 (PROSITE_PROFILES); IPR002172 (PROSITE_PROFILES); SSF57196 (SUPERFAMILY); IPR002172 (SUPERFAMILY); SSF63825 (SUPERFAMILY)                                                         |
| 273 | c142390_g1_i1_len_1132_path_1110_0_1131_3                        | 14  | chi11_metan ame: full=endochitinase 11 ame: full=chitinase 11 flags: precursor | 378 | 1.74E-06  | 77.00% | 0.354 Y | CYTOPLASMIC_DOMAIN (PHOBIUS); NON_CYTOPLASMIC_DOMAIN (PHOBIUS); TRANSMEMBRANE (PHOBIUS)                                                                                                                                                                                                                                                                                                                                                                                                                        |
| 274 | c142390_g1_i1_len_1132_path_1110_0_1131_5                        | 14  | periplasmic endochitinase                                                      | 377 | 0         | 99.00% | 0.11    | IPR003610 (SMART); IPR013781 (G3DSA:3.20.20.GENE3D); IPR003610 (G3DSA:2.10.10.GENE3D); IPR003610 (PFAM); PTHR11177:SF120 (PANTHER); PTHR11177 (PANTHER); IPR017853 (SUPERFAMILY); IPR003610 (SUPERFAMILY)                                                                                                                                                                                                                                                                                                      |
| 275 | c14244_g1_i1_len_1031_path_1061_0_829_1890_830_830_54_831_1030_1 | 50  | transcription initiation factor tfiid subunit 5                                | 344 | 3.97E-98  | 84.20% | 0.139   | IPR020472 (PRINTS); IPR001680 (SMART); IPR001680 (PFAM); IPR015943 (G3DSA:2.130.10.GENE3D); PTHR19879 (PANTHER); IPR019775 (PROSITE_PATTERNS); IPR019775 (PROSITE_PATTERNS); CYTOPLASMIC_DOMAIN (PHOBIUS); CYTOPLASMIC_DOMAIN (PHOBIUS); NON_CYTOPLASMIC_DOMAIN (PHOBIUS); TRANSMEMBRANE (PHOBIUS); TRANSMEMBRANE (PHOBIUS); IPR001680 (PROSITE_PROFILES); IPR001680 (PROSITE_PROFILES); IPR001680 (PROSITE_PROFILES); IPR017986 (PROSITE_PROFILES); IPR017986 (SUPERFAMILY); TMhelix (TMHMM); TMhelix (TMHMM) |
| 276 | c142919_g1_i1_len_2242_path_2234_0_2241_4                        | 190 | poc1 centriolar protein homolog a                                              | 747 | 0         | 73.60% | 0.104   | Coil (COILS); IPR001680 (SMART); IPR001680 (PFAM); IPR015943 (G3DSA:2.130.10.GENE3D); PTHR22847:SF319 (PANTHER); PTHR22847 (PANTHER); IPR019775 (PROSITE_PATTERNS); IPR001680 (PROSITE_PROFILES); IPR001680 (PROSITE_PROFILES); IPR017986 (PROSITE_PROFILES); IPR001680 (PROSITE_PROFILES); IPR001680 (PROSITE_PROFILES); IPR001680 (PROSITE_PROFILES); IPR017986 (SUPERFAMILY)                                                                                                                                |
| 277 | c143025_g1_i1_len_435_path_413_0_434_0                           | 3   | glycosyl-phosphatidylinositol-linked carbonic anhydrase                        | 145 | 2.13E-13  | 54.20% | 0.268   | IPR001148 (PFAM); IPR001148 (G3DSA:3.10.200.GENE3D); IPR023561 (PANTHER); IPR001148 (PROSITE_PROFILES); IPR001148 (SUPERFAMILY)                                                                                                                                                                                                                                                                                                                                                                                |
| 278 | c143234_g1_i1_len_722_path_1_0_721_5                             | 16  | serine threonine-protein phosphatase pp1-beta catalytic subunit-like           | 240 | 1.36E-170 | 98.20% | 0.115   | IPR006186 (PRINTS); IPR006186 (SMART); IPR004843 (PFAM); IPR029052 (G3DSA:3.60.21.GENE3D); PTHR11668:SF204 (PANTHER); PTHR11668 (PANTHER); IPR006186 (PROSITE_PATTERNS); IPR029052 (SUPERFAMILY)                                                                                                                                                                                                                                                                                                               |
| 279 | c143258_g1_i1_len_1015_path_1029_0_1014_2                        | 12  | zinc finger protein 235-like isoform x2                                        | 338 | 8.42E-32  | 62.30% | 0.306   | IPR015880 (SMART); IPR013087 (G3DSA:3.30.160.GENE3D); PF13465 (PFAM); IPR013087 (G3DSA:3.30.160.GENE3D); PTHR24409:SF13 (PANTHER); PTHR24409 (PANTHER); IPR007087 (PROSITE_PATTERNS); IPR007087 (PROSITE_PATTERNS); IPR007087 (PROSITE_PROFILES); IPR007087 (PROSITE_PROFILES); SSF57667 (SUPERFAMILY); SSF57667 (SUPERFAMILY); SSF57667 (SUPERFAMILY)                                                                                                                                                         |

|     |                                           |    |                                                      |     |           |        |         |                                                                                                                                                                                                                                                                                                                                                                                                                                                                                                                                                                                                                             |
|-----|-------------------------------------------|----|------------------------------------------------------|-----|-----------|--------|---------|-----------------------------------------------------------------------------------------------------------------------------------------------------------------------------------------------------------------------------------------------------------------------------------------------------------------------------------------------------------------------------------------------------------------------------------------------------------------------------------------------------------------------------------------------------------------------------------------------------------------------------|
|     |                                           |    |                                                      |     |           |        |         | PR00019 (PRINTS); IPR003591 (SMART); SM00364 (SMART); SM00365 (SMART); IPR001611 (PFAM); IPR001611 (PFAM); G3DSA:3.80.10.10 (GENE3D); PTHR24365 (PANTHER); IPR001611 (PROSITE_PROFILES); SSF52058 (SUPERFAMILY); TMhelix (TMHMM)                                                                                                                                                                                                        |
| 280 | c143443_g1_i1_len_1182_path_1160_0_1181_3 | 16 | leucine rich repeat protein                          | 394 | 2.26E-27  | 55.40% | 0.252   | Coil (COILS); IPR027417 (G3DSA:3.40.50.GENE3D); PTHR23122:SF32 (PANTHER); PTHR23122 (PANTHER); CYTOPLASMIC_DOMAIN (PHOBIUS); NON_CYTOPLASMIC_DOMAIN (PHOBIUS); NON_CYTOPLASMIC_DOMAIN (PHOBIUS); CYTOPLASMIC_DOMAIN (PHOBIUS); TRANSMEMBRANE (PHOBIUS); TRANSMEMBRANE (PHOBIUS); IPR027417 (SUPERFAMILY); TMhelix (TMHMM)                                                                                                                                                                                                                                                                                                   |
| 281 | c143464_g1_i1_len_660_path_1_0_659_2      | 25 | maguk p55 subfamily member partial                   | 220 | 2.91E-23  | 87.60% | 0.251   | IPR015880 (SMART); PF13912 (PFAM); IPR013087 (G3DSA:3.30.160.GENE3D); IPR013087 (G3DSA:3.30.160.GENE3D); IPR013087 (G3DSA:3.30.160.GENE3D); PF13465 (PFAM); PTHR24409 (PANTHER); IPR007087 (PROSITE_PATTERNS); IPR007087 (PROSITE_PATTERNS); IPR007087 (PROSITE_PATTERNS); IPR007087 (PROSITE_PATTERNS); CYTOPLASMIC_DOMAIN (PHOBIUS); NON_CYTOPLASMIC_DOMAIN (PHOBIUS); TRANSMEMBRANE (PHOBIUS); IPR007087 (PROSITE_PROFILES); IPR007087 (PROSITE_PROFILES); IPR007087 (PROSITE_PROFILES); IPR007087 (PROSITE_PROFILES); SSF57667 (SUPERFAMILY); SSF57667 (SUPERFAMILY)                                                    |
| 282 | c143570_g1_i1_len_717_path_695_0_716_4    | 10 | zinc finger protein 484-like                         | 239 | 6.66E-48  | 61.40% | 0.108   | IPR004911 (PFAM); IPR004911 (PANTHER)                                                                                                                                                                                                                                                                                                                                                                                                                                                                                                                                                                                       |
| 283 | c14364_g1_i1_len_957_path_985_0_956_5     | 38 | gamma-interferon-inducible lysosomal thiol reductase | 307 | 6.45E-24  | 53.30% | 0.163   | IPR006212 (SMART); TRANSMEMBRANE (PHOBIUS); NON_CYTOPLASMIC_DOMAIN (PHOBIUS); CYTOPLASMIC_DOMAIN (PHOBIUS); TRANSMEMBRANE (PHOBIUS); TRANSMEMBRANE (PHOBIUS); CYTOPLASMIC_DOMAIN (PHOBIUS); CYTOPLASMIC_DOMAIN (PHOBIUS); NON_CYTOPLASMIC_DOMAIN (PHOBIUS); TRANSMEMBRANE (PHOBIUS); TRANSMEMBRANE (PHOBIUS); CYTOPLASMIC_DOMAIN (PHOBIUS); TRANSMEMBRANE (PHOBIUS); NON_CYTOPLASMIC_DOMAIN (PHOBIUS); TMhelix (TMHMM); TMhelix (TMHMM)                                                                                                                                                                                     |
| 284 | c143692_g1_i1_len_1010_path_1_0_1009_4    | 23 | cysteine-rich with egf-like domain protein 2         | 337 | 1.53E-30  | 69.20% | 0.099   | IPR008373 (PRINTS); IPR003119 (SMART); IPR008139 (SMART); IPR011001 (G3DSA:1.10.225.GENE3D); IPR011001 (G3DSA:1.10.225.GENE3D); IPR007856 (PFAM); IPR003119 (PFAM); IPR008138 (PFAM); PTHR11480 (PANTHER); PTHR11480:SF3 (PANTHER); NON_CYTOPLASMIC_DOMAIN (PHOBIUS); SIGNAL_PEPTIDE_H_REGION (PHOBIUS); SIGNAL_PEPTIDE_N_REGION (PHOBIUS); SIGNAL_PEPTIDE (PHOBIUS); SIGNAL_PEPTIDE_C_REGION (PHOBIUS); IPR008139 (PROSITE_PROFILES); IPR003119 (PROSITE_PROFILES); IPR008139 (PROSITE_PROFILES); IPR008139 (PROSITE_PROFILES); IPR011001 (SUPERFAMILY); IPR011001 (SUPERFAMILY); IPR011001 (SUPERFAMILY); TMhelix (TMHMM) |
| 285 | c14427_g1_i1_len_1166_path_1_0_1165_5     | 13 | proactivator polypeptide-like                        | 388 | 1.46E-107 | 61.80% | 0.424 Y | NON_CYTOPLASMIC_DOMAIN (PHOBIUS); TRANSMEMBRANE (PHOBIUS); CYTOPLASMIC_DOMAIN (PHOBIUS); TRANSMEMBRANE (PHOBIUS); TRANSMEMBRANE (PHOBIUS); NON_CYTOPLASMIC_DOMAIN (PHOBIUS); NON_CYTOPLASMIC_DOMAIN (PHOBIUS); CYTOPLASMIC_DOMAIN (PHOBIUS); CYTOPLASMIC_DOMAIN (PHOBIUS); TRANSMEMBRANE (PHOBIUS); TRANSMEMBRANE (PHOBIUS); TMhelix (TMHMM); TMhelix (TMHMM)                                                                                                                                                                                                                                                               |
| 286 | c144270_g1_i1_len_952_path_1_0_951_1      | 21 | polycystic kidney disease protein 2                  | 317 | 3.58E-07  | 71.17% | 0.124   | IPR002165 (PFAM); IPR015915 (G3DSA:2.120.10.GENE3D); PF13854 (PFAM); PTHR10574 (PANTHER); PTHR10574:SF223 (PANTHER); SSF117281 (SUPERFAMILY)                                                                                                                                                                                                                                                                                                                                                                                                                                                                                |
| 287 | c144606_g1_i1_len_347_path_1_0_346_0      | 5  | attractin-like protein 1                             | 116 | 9.53E-36  | 70.80% | 0.127   |                                                                                                                                                                                                                                                                                                                                                                                                                                                                                                                                                                                                                             |



|     |                                                                  |    |                                                                            |     |           |         |         |                                                                                                                                                                                                                                                                                                                                |
|-----|------------------------------------------------------------------|----|----------------------------------------------------------------------------|-----|-----------|---------|---------|--------------------------------------------------------------------------------------------------------------------------------------------------------------------------------------------------------------------------------------------------------------------------------------------------------------------------------|
| 288 | c144677_g1_i1_len_2052_path_2030_0_2051_1                        | 26 | acetylornithine deacetylase                                                | 684 | 0         | 99.00%  | 0.118   | IPR002933 (PFAM); IPR010169 (TIGRFAM); IPR011650 (PFAM); G3DSA:3.40.630.10 (GENE3D); IPR011650 (G3DSA:3.30.70.GENE3D); PTHR11014:SF75 (PANTHER); PTHR11014 (PANTHER); IPR001261 (PROSITE_PATTERNS); IPR001261 (PROSITE_PATTERNS); IPR010169 (HAMAP); SSF53187 (SUPERFAMILY); IPR011650 (SUPERFAMILY)                           |
| 289 | c144709_g1_i1_len_563_path_541_0_562_0                           | 4  | transcriptional regulator partial                                          | 188 | 1.84E-126 | 98.80%  | 0.138   | no IPS match                                                                                                                                                                                                                                                                                                                   |
| 290 | c144797_g1_i1_len_248_path_226_0_247_4                           | 0  | nitrate reductase catalytic partial                                        | 83  | 3.55E-51  | 100.00% | 0.111   | IPR006656 (PFAM); G3DSA:3.40.228.10 (GENE3D); PTHR11615:SF123 (PANTHER); PTHR11615 (PANTHER); SSF53706 (SUPERFAMILY)                                                                                                                                                                                                           |
| 291 | c144968_g1_i1_len_1140_path_1_0_1139_1                           | 20 | peptidyl-prolyl cis-trans isomerase-like 2                                 | 380 | 8.38E-152 | 80.30%  | 0.168   | Coil (COILS); IPR002130 (PRINTS); IPR002130 (PFAM); IPR029000 (G3DSA:2.40.100.GENE3D); IPR024936 (PANTHER); PTHR11071:SF147 (PANTHER); IPR020892 (PROSITE_PATTERNS); IPR002130 (PROSITE_PROFILES); IPR029000 (SUPERFAMILY)                                                                                                     |
| 292 | c144970_g1_i1_len_671_path_58_0_670_3                            | 10 | peptidyl-alpha-hydroxyglycine alpha-amidating lyase 1                      | 224 | 3.75E-82  | 67.90%  | 0.108   | IPR000720 (PRINTS); IPR011042 (G3DSA:2.120.10.GENE3D); IPR001258 (PFAM); PTHR10680 (PANTHER); IPR013017 (PROSITE_PROFILES); IPR013017 (PROSITE_PROFILES); IPR013017 (PROSITE_PROFILES); SSF63825 (SUPERFAMILY)                                                                                                                 |
| 293 | c145030_g1_i1_len_652_path_630_0_651_3                           | 8  | isocitrate dehydrogenase                                                   | 218 | 4.13E-66  | 83.50%  | 0.187   | IPR024084 (G3DSA:3.40.718.GENE3D); IPR024084 (PFAM); PTHR11835:SF42 (PANTHER); IPR001804 (PANTHER); SSF53659 (SUPERFAMILY); TMhelix (TMHMM)                                                                                                                                                                                    |
| 294 | c145126_g1_i1_len_1316_path_1_0_1315_3                           | 13 | sco- partial                                                               | 439 | 1.32E-15  | 53.90%  | 0.356 Y | IPR025155 (PFAM); TRANSMEMBRANE (PHOBIUS); CYTOPLASMIC_DOMAIN (PHOBIUS); NON_CYTOPLASMIC_DOMAIN (PHOBIUS); TMhelix (TMHMM)                                                                                                                                                                                                     |
| 295 | c145226_g1_i1_len_750_path_652_0_551_1204_552_650_1204_651_749_4 | 15 | ---NA---                                                                   | 250 |           |         | 0.105   | TRANSMEMBRANE (PHOBIUS); CYTOPLASMIC_DOMAIN (PHOBIUS); CYTOPLASMIC_DOMAIN (PHOBIUS); TRANSMEMBRANE (PHOBIUS); TRANSMEMBRANE (PHOBIUS); NON_CYTOPLASMIC_DOMAIN (PHOBIUS); NON_CYTOPLASMIC_DOMAIN (PHOBIUS); TMhelix (TMHMM)                                                                                                     |
| 296 | c145749_g1_i1_len_334_path_1_0_333_1                             | 2  | ---NA---                                                                   | 111 |           |         | 0.501 Y | IPR002172 (SMART); IPR002172 (G3DSA:4.10.400.GENE3D); IPR002172 (PFAM); SIGNAL_PEPTIDE_C_REGION (PHOBIUS); NON_CYTOPLASMIC_DOMAIN (PHOBIUS); SIGNAL_PEPTIDE_N_REGION (PHOBIUS); SIGNAL_PEPTIDE_H_REGION (PHOBIUS); SIGNAL_PEPTIDE (PHOBIUS); IPR002172 (PROSITE_PROFILES); SignalP-noTM (SIGNALP_EUK); IPR002172 (SUPERFAMILY) |
| 297 | c1464_g2_i1_len_849_path_827_0_848_4                             | 9  | proclotting enzyme                                                         | 283 | 2.93E-08  | 74.00%  | 0.116   | G3DSA:2.40.10.10 (GENE3D); IPR001254 (PFAM); PTHR24264 (PANTHER); PTHR24264:SF9 (PANTHER); IPR009003 (SUPERFAMILY)                                                                                                                                                                                                             |
| 298 | c146601_g1_i1_len_368_path_1_0_367_4                             | 4  | ankyrin repeat-containing protein                                          | 123 | 3.35E-13  | 59.10%  | 0.118   | IPR002110 (PRINTS); IPR002110 (SMART); IPR020683 (G3DSA:1.25.40.GENE3D); IPR020683 (PFAM); PTHR24198 (PANTHER); IPR020683 (PROSITE_PROFILES); IPR002110 (PROSITE_PROFILES); IPR002110 (PROSITE_PROFILES); IPR020683 (SUPERFAMILY)                                                                                              |
| 299 | c146914_g1_i1_len_737_path_715_0_736_3                           | 14 | down syndrome cell adhesion molecule-like protein dscam2                   | 246 | 7.34E-20  | 63.90%  | 0.156   | IPR003598 (SMART); IPR003599 (SMART); IPR013783 (G3DSA:2.60.40.GENE3D); IPR013098 (PFAM); PTHR10489:SF580 (PANTHER); PTHR10489 (PANTHER); NON_CYTOPLASMIC_DOMAIN (PHOBIUS); CYTOPLASMIC_DOMAIN (PHOBIUS); TRANSMEMBRANE (PHOBIUS); IPR007110 (PROSITE_PROFILES); SSF48726 (SUPERFAMILY)                                        |
| 300 | c147018_g1_i1_len_658_path_636_0_657_4                           | 7  | ---NA---                                                                   | 219 |           |         | 0.103   | IPR017905 (G3DSA:1.20.120.GENE3D); PTHR12645 (PANTHER); IPR017905 (PROSITE_PROFILES); IPR017905 (SUPERFAMILY)                                                                                                                                                                                                                  |
| 301 | c147062_g1_i1_len_513_path_491_0_512_4                           | 3  | attractin-like protein 1 isoform x1                                        | 171 | 1.75E-37  | 80.70%  | 0.121   | PTHR10574:SF3 (PANTHER); PTHR10574 (PANTHER); NON_CYTOPLASMIC_DOMAIN (PHOBIUS); TRANSMEMBRANE (PHOBIUS); CYTOPLASMIC_DOMAIN (PHOBIUS); TMhelix (TMHMM)                                                                                                                                                                         |
| 302 | c147306_g1_i1_len_536_path_514_0_535_0                           | 4  | leucine-rich repeat and calponin homology domain-containing protein 2-like | 179 | 4.65E-51  | 71.70%  | 0.122   | IPR001715 (SMART); IPR001715 (PFAM); IPR001715 (G3DSA:1.10.418.GENE3D); TRANSMEMBRANE (PHOBIUS); CYTOPLASMIC_DOMAIN (PHOBIUS); NON_CYTOPLASMIC_DOMAIN (PHOBIUS); IPR001715 (PROSITE_PROFILES); IPR001715 (SUPERFAMILY); TMhelix (TMHMM)                                                                                        |
| 303 | c147397_g1_i1_len_453_path_431_0_452_2                           | 5  | ejaculatory bulb-specific protein 3                                        | 151 | 9.01E-37  | 70.00%  | 0.554 Y | IPR005055 (PFAM); IPR005055 (G3DSA:1.10.2080.GENE3D); IPR005055 (PANTHER); PTHR11257:SF2 (PANTHER); NON_CYTOPLASMIC_DOMAIN (PHOBIUS); TRANSMEMBRANE (PHOBIUS); CYTOPLASMIC_DOMAIN (PHOBIUS); SignalP-TM (SIGNALP_EUK); IPR005055 (SUPERFAMILY); TMhelix (TMHMM)                                                                |

|     |                                                              |    |                                                                                                                                                                                |     |           |         |         |                                                                                                                                                                                                                                                                                                                                                                                                                                                                  |
|-----|--------------------------------------------------------------|----|--------------------------------------------------------------------------------------------------------------------------------------------------------------------------------|-----|-----------|---------|---------|------------------------------------------------------------------------------------------------------------------------------------------------------------------------------------------------------------------------------------------------------------------------------------------------------------------------------------------------------------------------------------------------------------------------------------------------------------------|
| 304 | c14754_g1_i1_len_382_path_637_0_91_732_92_381_0              | 0  | zinc finger protein                                                                                                                                                            | 128 | 1.62E-21  | 56.70%  | 0.1     | IPR015880 (SMART); IPR013087 (G3DSA:3.30.160.GENE3D); PF13465 (PFAM); IPR013087 (G3DSA:3.30.160.GENE3D); PF13894 (PFAM); PTHR24409 (PANTHER); PTHR24409:SF14 (PANTHER); IPR007087 (PROSITE_PATTERNS); IPR007087 (PROSITE_PATTERNS); IPR007087 (PROSITE_PATTERNS); IPR007087 (PROSITE_PROFILES); IPR007087 (PROSITE_PROFILES); IPR007087 (PROSITE_PROFILES); IPR007087 (PROSITE_PROFILES); SSF57667 (SUPERFAMILY); SSF57667 (SUPERFAMILY); SSF57667 (SUPERFAMILY) |
| 305 | c1476_g1_i1_len_1590_path_1568_0_1589_0                      | 50 | nitrilase homolog 1-like                                                                                                                                                       | 530 | 0         | 69.50%  | 0.136   | Coil (COILS); IPR001310 (PFAM); IPR003010 (PFAM); IPR003010 (G3DSA:3.60.110.GENE3D); IPR011146 (G3DSA:3.30.428.GENE3D); PTHR23088 (PANTHER); PTHR23088:SF5 (PANTHER); IPR019808 (PROSITE_PATTERNS); IPR001110 (PROSITE_PATTERNS); IPR011146 (PROSITE_PROFILES); IPR003010 (PROSITE_PROFILES); IPR003010 (SUPERFAMILY); IPR011146 (SUPERFAMILY)                                                                                                                   |
| 306 | c147604_g1_i1_len_824_path_1_0_823_1                         | 23 | beta- -n-acetylgalactosaminyltransferase bre-4-like                                                                                                                            | 275 | 1.01E-41  | 69.20%  | 0.123   | IPR029044 (G3DSA:3.90.550.GENE3D); IPR027791 (PFAM); PTHR19300:SF30 (PANTHER); IPR003859 (PANTHER); IPR029044 (SUPERFAMILY)                                                                                                                                                                                                                                                                                                                                      |
| 307 | c147690_g1_i1_len_745_path_723_0_744_4                       | 6  | protease do                                                                                                                                                                    | 248 | 1.86E-142 | 100.00% | 0.105   | IPR001478 (SMART); IPR001478 (G3DSA:2.30.42.GENE3D); IPR001478 (PFAM); IPR001478 (G3DSA:2.30.42.GENE3D); PTHR22939 (PANTHER); PTHR22939:SF79 (PANTHER); IPR001478 (PROSITE_PROFILES); IPR001478 (PROSITE_PROFILES); IPR001478 (SUPERFAMILY); IPR001478 (SUPERFAMILY)                                                                                                                                                                                             |
| 308 | c147752_g1_i1_len_472_path_450_0_471_2                       | 17 | nidogen-2 isoform x5                                                                                                                                                           | 157 | 3.21E-23  | 54.60%  | 0.429 Y | IPR000716 (SMART); IPR000716 (PFAM); IPR000716 (G3DSA:4.10.800.GENE3D); IPR022339 (PANTHER); IPR000716 (PROSITE_PATTERNS); IPR000716 (PROSITE_PATTERNS); IPR000716 (PROSITE_PROFILES); IPR000716 (PROSITE_PROFILES); IPR000716 (SUPERFAMILY); IPR000716 (SUPERFAMILY); TMhelix (TMHMM)                                                                                                                                                                           |
| 309 | c147893_g1_i1_len_915_path_893_0_914_0                       | 37 | stromal cell-derived factor 2                                                                                                                                                  | 300 | 7.11E-95  | 75.50%  | 0.402 Y | IPR016093 (SMART); G3DSA:2.80.10.50 (GENE3D); IPR016093 (PFAM); IPR027005 (PANTHER); NON_CYTOPLASMIC_DOMAIN (PHOBIUS); TRANSMEMBRANE (PHOBIUS); CYTOPLASMIC_DOMAIN (PHOBIUS); IPR016093 (PROSITE_PROFILES); IPR016093 (PROSITE_PROFILES); IPR016093 (PROSITE_PROFILES); SignalP-TM (SIGNALP_GRAM_POSITIVE); IPR016093 (SUPERFAMILY)                                                                                                                              |
| 310 | c148014_g1_i1_len_775_path_753_0_774_0                       | 11 | mam and ldl-receptor class a domain-containing protein 2-like                                                                                                                  | 259 | 8.96E-41  | 60.50%  | 0.149   | IPR000998 (SMART); IPR000998 (PFAM); PTHR23282 (PANTHER); IPR000998 (PROSITE_PATTERNS); IPR000998 (PROSITE_PATTERNS); IPR000998 (PROSITE_PROFILES); IPR000998 (PROSITE_PROFILES); IPR013320 (SUPERFAMILY)                                                                                                                                                                                                                                                        |
| 311 | c148014_g1_i1_len_775_path_753_0_774_2                       | 11 | mlrp2_acrmi ame: full=mam and ldl-receptor class a domain-containing protein 2 ame: full=skeletal organic matrix mam and ldl-receptor 2 short=som mam and ldl-receptor partial | 258 | 1.40E-07  | 55.86%  | 0.107   | IPR000998 (PFAM); PTHR23282 (PANTHER); PTHR23282:SF75 (PANTHER); IPR000998 (PROSITE_PROFILES); IPR013320 (SUPERFAMILY)                                                                                                                                                                                                                                                                                                                                           |
| 312 | c148055_g1_i1_len_457_path_1_0_456_4                         | 3  | tyrosine-protein kinase receptor tie-1-like isoform x1                                                                                                                         | 152 | 3.57E-09  | 62.30%  | 0.106   | G3DSA:2.10.25.10 (GENE3D); IPR013032 (PFAM); IPR013032 (PROSITE_PATTERNS); IPR013032 (PROSITE_PATTERNS); NON_CYTOPLASMIC_DOMAIN (PHOBIUS); TRANSMEMBRANE (PHOBIUS); CYTOPLASMIC_DOMAIN (PHOBIUS); IPR000742 (PROSITE_PROFILES)                                                                                                                                                                                                                                   |
| 313 | c14850_g1_i1_len_754_path_1_0_306_308_307_753_4              | 29 | peptidyl-prolyl cis-trans isomerase cyp11 isoform x1                                                                                                                           | 243 | 1.50E-105 | 88.10%  | 0.133   | IPR002130 (PRINTS); IPR002130 (PFAM); IPR029000 (G3DSA:2.40.100.GENE3D); IPR024936 (PANTHER); PTHR11071:SF229 (PANTHER); IPR020892 (PROSITE_PATTERNS); IPR002130 (PROSITE_PROFILES); IPR029000 (SUPERFAMILY)                                                                                                                                                                                                                                                     |
| 314 | c14850_g1_i2_len_870_path_1_0_306_1685_307_422_308_423_869_3 | 8  | peptidyl-prolyl cis-trans isomerase g isoform x2                                                                                                                               | 282 | 9.30E-28  | 75.80%  | 0.181   | IPR029000 (G3DSA:2.40.100.GENE3D); IPR002130 (PFAM); IPR024936 (PANTHER); PTHR11071:SF229 (PANTHER); IPR002130 (PROSITE_PROFILES); IPR029000 (SUPERFAMILY)                                                                                                                                                                                                                                                                                                       |
| 315 | c14850_g1_i2_len_870_path_1_0_306_1685_307_422_308_423_869_4 | 8  | peptidyl-prolyl cis-trans isomerase cyp11-like isoform x2                                                                                                                      | 282 | 2.70E-70  | 88.70%  | 0.133   | IPR002130 (PRINTS); IPR002130 (PFAM); IPR029000 (G3DSA:2.40.100.GENE3D); PTHR11071:SF229 (PANTHER); IPR024936 (PANTHER); IPR020892 (PROSITE_PATTERNS); CYTOPLASMIC_DOMAIN (PHOBIUS); TRANSMEMBRANE (PHOBIUS); CYTOPLASMIC_DOMAIN (PHOBIUS); TRANSMEMBRANE (PHOBIUS); NON_CYTOPLASMIC_DOMAIN (PHOBIUS); IPR002130 (PROSITE_PROFILES); IPR029000 (SUPERFAMILY)                                                                                                     |
| 316 | c148556_g1_i1_len_686_path_1_0_685_2                         | 5  | serine proteinase stubble                                                                                                                                                      | 228 | 4.83E-62  | 71.00%  | 0.183   | IPR001314 (PRINTS); IPR001254 (SMART); G3DSA:2.40.10.10 (GENE3D); IPR001254 (PFAM); PTHR24268:SF95 (PANTHER); PTHR24268 (PANTHER); IPR001254 (PROSITE_PROFILES); IPR009003 (SUPERFAMILY)                                                                                                                                                                                                                                                                         |

|     |                                           |    |                                                                          |     |           |         |         |                                                                                                                                                                                                                                                                                                                                                                                                                                                         |
|-----|-------------------------------------------|----|--------------------------------------------------------------------------|-----|-----------|---------|---------|---------------------------------------------------------------------------------------------------------------------------------------------------------------------------------------------------------------------------------------------------------------------------------------------------------------------------------------------------------------------------------------------------------------------------------------------------------|
| 317 | c148572_g1_i1_len_594_path_572_0_593_2    | 6  | ligand of numb protein x 2                                               | 198 | 1.25E-44  | 68.40%  | 0.154   | IPR001478 (SMART); IPR001478 (PFAM); IPR001478 (G3DSA:2.30.42.GENE3D); IPR001478 (G3DSA:2.30.42.GENE3D); PTHR19964 (PANTHER); IPR001478 (PROSITE_PROFILES); IPR001478 (PROSITE_PROFILES); IPR001478 (SUPERFAMILY); IPR001478 (SUPERFAMILY)                                                                                                                                                                                                              |
| 318 | c148734_g1_i1_len_389_path_367_0_388_3    | 4  | tryptophan partial                                                       | 130 | 4.81E-84  | 100.00% | 0.105   | IPR018227 (PFAM); PTHR32195:SF11 (PANTHER); PTHR32195 (PANTHER); CYTOPLASMIC_DOMAIN (PHOBIUS); NON_CYTOPLASMIC_DOMAIN (PHOBIUS); TRANSMEMBRANE (PHOBIUS); TRANSMEMBRANE (PHOBIUS); CYTOPLASMIC_DOMAIN (PHOBIUS); NON_CYTOPLASMIC_DOMAIN (PHOBIUS); TMhelix (TMHMM); TMhelix (TMHMM)                                                                                                                                                                     |
| 319 | c149051_g1_i1_len_256_path_1_0_255_0      | 0  | transmembrane protease serine 2                                          | 86  | 1.31E-14  | 64.20%  | 0.414 Y | IPR001314 (PRINTS); G3DSA:2.40.10.10 (GENE3D); IPR001254 (PFAM); PTHR24250 (PANTHER); IPR018114 (PROSITE_PATTERNS); IPR009003 (SUPERFAMILY)                                                                                                                                                                                                                                                                                                             |
| 320 | c149257_g1_i1_len_1229_path_1207_0_1228_0 | 53 | ---NA---                                                                 | 410 |           |         | 0.111   | Coil (COILS)                                                                                                                                                                                                                                                                                                                                                                                                                                            |
| 321 | c149257_g1_i1_len_1229_path_1207_0_1228_1 | 53 | ---NA---                                                                 | 410 |           |         | 0.106   | Coil (COILS)                                                                                                                                                                                                                                                                                                                                                                                                                                            |
| 322 | c149492_g1_i1_len_282_path_260_0_281_5    | 2  | glutamate synthase                                                       | 94  | 9.85E-52  | 93.90%  | 0.149   | PR00419 (PRINTS); G3DSA:1.10.1060.10 (GENE3D); G3DSA:3.50.50.60 (GENE3D); PF13450 (PFAM); IPR028261 (PFAM); PTHR11938 (PANTHER); PTHR11938:SF61 (PANTHER); SSF51905 (SUPERFAMILY)                                                                                                                                                                                                                                                                       |
| 323 | c149638_g1_i1_len_225_path_203_0_224_2    | 0  | gastrula zinc finger protein                                             | 75  | 6.36E-12  | 65.80%  | 0.107   | IPR015880 (SMART); IPR013087 (G3DSA:3.30.160.GENE3D); PF13465 (PFAM); IPR013087 (G3DSA:3.30.160.GENE3D); PTHR24409:SF13 (PANTHER); PTHR24409 (PANTHER); IPR007087 (PROSITE_PATTERNS); IPR007087 (PROSITE_PATTERNS); IPR007087 (PROSITE_PROFILES); IPR007087 (PROSITE_PROFILES); SSF57667 (SUPERFAMILY)                                                                                                                                                  |
| 324 | c149791_g1_i1_len_987_path_1_0_986_3      | 6  | broad-complex isoform a-nze                                              | 329 | 2.19E-46  | 63.70%  | 0.178   | Coil (COILS); IPR000210 (SMART); G3DSA:3.30.710.10 (GENE3D); IPR013069 (PFAM); PTHR23110 (PANTHER); NON_CYTOPLASMIC_DOMAIN (PHOBIUS); CYTOPLASMIC_DOMAIN (PHOBIUS); NON_CYTOPLASMIC_DOMAIN (PHOBIUS); TRANSMEMBRANE (PHOBIUS); TRANSMEMBRANE (PHOBIUS); IPR000210 (PROSITE_PROFILES); IPR011333 (SUPERFAMILY); TMhelix (TMHMM); TMhelix (TMHMM)                                                                                                         |
| 325 | c149794_g1_i1_len_572_path_1_0_571_1      | 5  | basement membrane-specific heparan sulfate proteoglycan core protein     | 191 | 5.84E-52  | 77.20%  | 0.098   | IPR001791 (SMART); IPR001791 (PFAM); IPR013320 (G3DSA:2.60.120.GENE3D); PTHR10574:SF247 (PANTHER); PTHR10574 (PANTHER); IPR001791 (PROSITE_PROFILES); IPR013320 (SUPERFAMILY)                                                                                                                                                                                                                                                                           |
| 326 | c149869_g1_i1_len_1070_path_1048_0_1069_5 | 6  | enolase                                                                  | 356 | 0         | 100.00% | 0.123   | IPR000941 (PRINTS); IPR029065 (G3DSA:3.20.20.GENE3D); IPR020811 (PFAM); IPR029017 (G3DSA:3.30.390.GENE3D); IPR020810 (PFAM); IPR000941 (TIGRFAM); IPR000941 (PANTHER); IPR020809 (PROSITE_PATTERNS); IPR000941 (HAMAP); IPR029065 (SUPERFAMILY); IPR029017 (SUPERFAMILY)                                                                                                                                                                                |
| 327 | c149933_g1_i1_len_1137_path_1115_0_1136_0 | 21 | von willebrand factor type egf and pentraxin domain-containing protein 1 | 379 | 4.89E-168 | 77.60%  | 0.125   | IPR000436 (SMART); G3DSA:2.10.70.10 (GENE3D); IPR000436 (PFAM); G3DSA:2.10.70.10 (GENE3D); G3DSA:2.10.70.10 (GENE3D); PTHR19325:SF340 (PANTHER); PTHR19325 (PANTHER); IPR000436 (PROSITE_PROFILES); IPR000436 (PROSITE_PROFILES); IPR000436 (PROSITE_PROFILES); IPR000436 (PROSITE_PROFILES); IPR000436 (PROSITE_PROFILES); IPR000436 (SUPERFAMILY); IPR000436 (SUPERFAMILY); IPR000436 (SUPERFAMILY); IPR000436 (SUPERFAMILY); IPR000436 (SUPERFAMILY) |
| 328 | c150363_g1_i1_len_751_path_729_0_750_5    | 8  | cerebellin-3                                                             | 250 | 4.96E-07  | 50.20%  | 0.108   | IPR001073 (PFAM); IPR008983 (G3DSA:2.60.120.GENE3D); CYTOPLASMIC_DOMAIN (PHOBIUS); CYTOPLASMIC_DOMAIN (PHOBIUS); NON_CYTOPLASMIC_DOMAIN (PHOBIUS); TRANSMEMBRANE (PHOBIUS); TRANSMEMBRANE (PHOBIUS); IPR001073 (PROSITE_PROFILES); IPR008983 (SUPERFAMILY); TMhelix (TMHMM); TMhelix (TMHMM)                                                                                                                                                            |
| 329 | c150404_g1_i1_len_422_path_1_0_421_0      | 3  | low quality protein: zinc finger protein 233                             | 141 | 2.16E-39  | 66.60%  | 0.116   | IPR015880 (SMART); IPR007087 (PFAM); PF13913 (PFAM); PF13465 (PFAM); IPR013087 (G3DSA:3.30.160.GENE3D); PTHR24409 (PANTHER); IPR007087 (PROSITE_PATTERNS); IPR007087 (PROSITE_PATTERNS); IPR007087 (PROSITE_PROFILES); IPR007087 (PROSITE_PROFILES); IPR007087 (PROSITE_PROFILES); IPR007087 (PROSITE_PROFILES); SSF57667 (SUPERFAMILY); SSF57667 (SUPERFAMILY); SSF57667 (SUPERFAMILY)                                                                 |

|     |                                                  |    |                                                               |     |           |         |         |                                                                                                                                                                                                                                                                                                                                                             |
|-----|--------------------------------------------------|----|---------------------------------------------------------------|-----|-----------|---------|---------|-------------------------------------------------------------------------------------------------------------------------------------------------------------------------------------------------------------------------------------------------------------------------------------------------------------------------------------------------------------|
| 330 | c150547_g1_i1_len_757_path_2_0_756_1             | 9  | ecdysis triggering hormone receptor isoform a                 | 252 | 5.89E-43  | 85.80%  | 0.102   | IPR000276 (PRINTS); G3DSA:1.20.1070.10 (GENE3D); IPR000276 (PFAM); PTHR24239 (PANTHER); PTHR24239:SF5 (PANTHER); CYTOPLASMIC_DOMAIN (PHOBIUS); TRANSMEMBRANE (PHOBIUS); NON_CYTOPLASMIC_DOMAIN (PHOBIUS); NON_CYTOPLASMIC_DOMAIN (PHOBIUS); TRANSMEMBRANE (PHOBIUS); IPR017452 (PROSITE_PROFILES); SSF81321 (SUPERFAMILY); TMhelix (TMHMM); TMhelix (TMHMM) |
| 331 | c15071_g2_i1_len_186_path_1013_0_185_3           | 0  | molecular chaperone partial                                   | 62  | 1.00E-35  | 99.80%  | 0.123   | IPR013126 (PRINTS); IPR013126 (PFAM); G3DSA:3.30.420.40 (GENE3D); PTHR19375:SF173 (PANTHER); PTHR19375 (PANTHER); IPR018181 (PROSITE_PATTERNS); SSF53067 (SUPERFAMILY)                                                                                                                                                                                      |
| 332 | c150776_g1_i1_len_989_path_1_0_988_2             | 8  | aminoacylase-1a-like isoform x1                               | 329 | 2.33E-88  | 76.50%  | 0.126   | IPR011650 (G3DSA:3.30.70.GENE3D); IPR002933 (PFAM); G3DSA:3.40.630.10 (GENE3D); PTHR11014:SF8 (PANTHER); PTHR11014 (PANTHER); IPR001261 (PROSITE_PATTERNS); IPR001261 (PROSITE_PATTERNS); CYTOPLASMIC_DOMAIN (PHOBIUS); NON_CYTOPLASMIC_DOMAIN (PHOBIUS); TRANSMEMBRANE (PHOBIUS); SSF53187 (SUPERFAMILY)                                                   |
| 333 | c151066_g1_i1_len_633_path_1_0_632_2             | 4  | antigen partial                                               | 211 | 4.96E-138 | 100.00% | 0.15    | IPR012332 (G3DSA:2.160.20.GENE3D); IPR011050 (SUPERFAMILY)                                                                                                                                                                                                                                                                                                  |
| 334 | c15109_g1_i1_len_397_path_508_0_394_58_395_396_4 | 2  | collagen alpha-1 chain-like                                   | 132 | 6.93E-29  | 81.80%  | 0.573 Y | IPR000885 (SMART); IPR000885 (PFAM); PTHR24023:SF441 (PANTHER); PTHR24023 (PANTHER); SIGNAL_PEPTIDE_H_REGION (PHOBIUS); NON_CYTOPLASMIC_DOMAIN (PHOBIUS); SIGNAL_PEPTIDE_C_REGION (PHOBIUS); SIGNAL_PEPTIDE (PHOBIUS); SIGNAL_PEPTIDE_N_REGION (PHOBIUS); IPR000885 (PRODOM); IPR000885 (PROSITE_PROFILES); SignalP-noTM (SIGNALP_EUK)                      |
| 335 | c151500_g1_i1_len_768_path_1_0_767_0             | 10 | retinol dehydrogenase 12- partial                             | 256 | 3.23E-83  | 70.00%  | 0.099   | IPR002198 (PRINTS); IPR002347 (PRINTS); IPR016040 (G3DSA:3.40.50.GENE3D); IPR002198 (PFAM); PTHR24320 (PANTHER); SSF51735 (SUPERFAMILY)                                                                                                                                                                                                                     |
| 336 | c151635_g1_i1_len_490_path_468_0_489_1           | 2  | n-acetylmuramoyl-l-alanine amidase                            | 163 | 6.99E-113 | 99.00%  | 0.103   | IPR002508 (SMART); IPR002508 (PFAM); IPR002508 (G3DSA:3.40.630.GENE3D); PTHR30404:SF0 (PANTHER); PTHR30404 (PANTHER); SSF53187 (SUPERFAMILY)                                                                                                                                                                                                                |
| 337 | c151643_g1_i1_len_465_path_1_0_464_1             | 5  | oxidoreductase with nad -binding rossmann-fold                | 155 | 5.25E-109 | 100.00% | 0.107   | IPR002347 (PRINTS); IPR016040 (G3DSA:3.40.50.GENE3D); IPR002198 (PFAM); PTHR24322 (PANTHER); PTHR24322:SF68 (PANTHER); IPR020904 (PROSITE_PATTERNS); SSF51735 (SUPERFAMILY)                                                                                                                                                                                 |
| 338 | c152187_g1_i1_len_427_path_1_0_426_3             | 5  | YEDN_ECOLIRecName: Full=Putative uncharacterized protein YedN | 143 | 4.13E-94  | 99.70%  | 0.16    | G3DSA:3.80.10.10 (GENE3D); SSF52058 (SUPERFAMILY)                                                                                                                                                                                                                                                                                                           |
| 339 | c152326_g1_i1_len_669_path_647_0_668_1           | 4  | dentin matrix protein 4-like                                  | 223 | 1.06E-20  | 76.00%  | 0.114   | IPR009581 (PFAM); IPR024869 (PANTHER); PTHR12450:SF8 (PANTHER)                                                                                                                                                                                                                                                                                              |
| 340 | c15236_g1_i1_len_549_path_1_0_34_36_35_548_2     | 6  | pre-b cell enhancing factor                                   | 178 | 3.38E-37  | 81.40%  | 0.127   | IPR016471 (PTHR11098:PANTHER); IPR007229 (PANTHER)                                                                                                                                                                                                                                                                                                          |
| 341 | c15236_g1_i2_len_574_path_1113_0_59_36_60_573_0  | 3  | nicotinamide phosphoribosyltransferase                        | 187 | 1.45E-36  | 79.90%  | 0.221   | IPR007229 (PANTHER); IPR016471 (PTHR11098:PANTHER)                                                                                                                                                                                                                                                                                                          |
| 342 | c152400_g1_i1_len_627_path_1_0_626_1             | 6  | neurexin-4 isoform x1                                         | 203 | 2.41E-22  | 62.10%  | 0.335   | IPR000421 (PFAM); IPR008979 (G3DSA:2.60.120.GENE3D); PTHR24543 (PANTHER); TRANSMEMBRANE (PHOBIUS); CYTOPLASMIC_DOMAIN (PHOBIUS); NON_CYTOPLASMIC_DOMAIN (PHOBIUS); IPR000421 (PROSITE_PROFILES); IPR008979 (SUPERFAMILY)                                                                                                                                    |
| 343 | c153243_g1_i1_len_427_path_1_0_426_2             | 5  | hypothetical protein, partial                                 | 142 | 4.52E-16  | 44.40%  | 0.147   | PTHR24023:SF405 (PANTHER); PTHR24023 (PANTHER)                                                                                                                                                                                                                                                                                                              |
| 344 | c153243_g1_i1_len_427_path_1_0_426_3             | 5  | collagen alpha-2 chain                                        | 143 | 2.11E-22  | 60.40%  | 0.119   | IPR008160 (PFAM); PTHR24023:SF379 (PANTHER); PTHR24023 (PANTHER)                                                                                                                                                                                                                                                                                            |
| 345 | c154025_g1_i1_len_383_path_1_0_382_1             | 1  | apolipoprotein d-like                                         | 122 | 4.98E-13  | 56.30%  | 0.104   | IPR000566 (PFAM); IPR012674 (G3DSA:2.40.128.GENE3D); PTHR10612 (PANTHER); IPR011038 (SUPERFAMILY)                                                                                                                                                                                                                                                           |
| 346 | c15450_g1_i1_len_835_path_1649_0_834_5           | 6  | cell filamentation protein fic                                | 278 | 9.58E-114 | 100.00% | 0.184   | IPR003812 (G3DSA:1.10.3290.GENE3D); IPR003812 (PFAM); IPR003812 (PROSITE_PROFILES); IPR003812 (SUPERFAMILY)                                                                                                                                                                                                                                                 |
| 347 | c15450_g2_i1_len_847_path_825_0_846_0            | 6  | peptidyl-prolyl cis-trans isomerase a                         | 283 | 3.54E-93  | 92.00%  | 0.101   | IPR002130 (PRINTS); IPR002130 (PFAM); IPR029000 (G3DSA:2.40.100.GENE3D); IPR024936 (PANTHER); PTHR11071:SF192 (PANTHER); IPR020892 (PROSITE_PATTERNS); IPR002130 (PROSITE_PROFILES); IPR029000 (SUPERFAMILY)                                                                                                                                                |
| 348 | c155295_g1_i1_len_238_path_216_0_237_5           | 2  | antigen partial                                               | 79  | 1.30E-41  | 98.00%  | 0.111   | IPR006315 (TIGRFAM); IPR005546 (G3DSA:2.40.128.GENE3D); IPR005546 (PFAM); IPR005546 (SUPERFAMILY)                                                                                                                                                                                                                                                           |
| 349 | c155411_g1_i1_len_765_path_743_0_764_0           | 10 | transferrin 2                                                 | 255 | 8.05E-100 | 62.10%  | 0.113   | IPR001156 (PRINTS); IPR001156 (SMART); G3DSA:3.40.190.10 (GENE3D); G3DSA:3.40.190.10 (GENE3D); G3DSA:3.40.190.10 (GENE3D); IPR001156 (PFAM); PTHR11485 (PANTHER); PTHR11485:SF18 (PANTHER); IPR001156 (PROSITE_PROFILES); IPR001156 (PROSITE_PROFILES); SSF53850 (SUPERFAMILY); SSF53850 (SUPERFAMILY)                                                      |

|     |                                                           |    |                                            |     |          |        |         |                                                                                                                                                                                                                                                                                                                                                                                                                                                                                                                                                                                                                                  |
|-----|-----------------------------------------------------------|----|--------------------------------------------|-----|----------|--------|---------|----------------------------------------------------------------------------------------------------------------------------------------------------------------------------------------------------------------------------------------------------------------------------------------------------------------------------------------------------------------------------------------------------------------------------------------------------------------------------------------------------------------------------------------------------------------------------------------------------------------------------------|
| 350 | c155466_g1_i1_len_347_path_325_0_346_1                    | 3  | zinc finger partial                        | 116 | 4.87E-19 | 60.30% | 0.102   | IPR015880 (SMART); IPR013087 (G3DSA:3.30.160.GENE3D); IPR013087 (G3DSA:3.30.160.GENE3D); IPR013087 (G3DSA:3.30.160.GENE3D); PF13465 (PFAM); PTHR24409 (PANTHER); IPR007087 (PROSITE_PATTERNS); IPR007087 (PROSITE_PATTERNS); IPR007087 (PROSITE_PROFILES); IPR007087 (PROSITE_PROFILES); IPR007087 (PROSITE_PROFILES); SSF57667 (SUPERFAMILY); SSF57667 (SUPERFAMILY)                                                                                                                                                                                                                                                            |
| 351 | c155618_g1_i1_len_324_path_1_0_323_5                      | 2  | tyrosine-protein kinase hopscotch          | 108 | 1.38E-42 | 80.00% | 0.155   | IPR001245 (PRINTS); IPR020635 (SMART); IPR001245 (PFAM); G3DSA:1.10.510.10 (GENE3D); PTHR24418 (PANTHER); IPR008266 (PROSITE_PATTERNS); IPR000719 (PROSITE_PROFILES); IPR011009 (SUPERFAMILY)                                                                                                                                                                                                                                                                                                                                                                                                                                    |
| 352 | c15576_g1_i1_len_1966_path_3794_0_234_72_2_35_1965_1      | 61 | hypothetical protein DAPPUDRAFT_316225     | 649 | 6.64E-58 | 50.40% | 0.425 Y | IPR001190 (PRINTS); IPR002557 (SMART); IPR017448 (SMART); IPR002557 (PFAM); IPR017448 (G3DSA:3.10.250.GENE3D); IPR001190 (PFAM); IPR016186 (G3DSA:3.10.100.GENE3D); IPR002557 (G3DSA:2.170.140.GENE3D); PTHR23301 (PANTHER); NON_CYTOPLASMIC_DOMAIN (PHOBIUS); CYTOPLASMIC_DOMAIN (PHOBIUS); NON_CYTOPLASMIC_DOMAIN (PHOBIUS); TRANSMEMBRANE (PHOBIUS); TRANSMEMBRANE (PHOBIUS); IPR001190 (PROSITE_PROFILES); IPR002557 (PROSITE_PROFILES); IPR002557 (PROSITE_PROFILES); IPR016187 (SUPERFAMILY); IPR002557 (SUPERFAMILY); IPR002557 (SUPERFAMILY); IPR017448 (SUPERFAMILY); TMhelix (TMHMM); TMhelix (TMHMM); TMhelix (TMHMM) |
| 353 | c15576_g1_i2_len_1802_path_1_0_70_72_71_18_01_2           | 66 | hypothetical protein DAPPUDRAFT_316225     | 594 | 1.41E-58 | 50.10% | 0.187   | IPR001190 (PRINTS); IPR002557 (SMART); IPR017448 (SMART); IPR017448 (G3DSA:3.10.250.GENE3D); IPR016186 (G3DSA:3.10.100.GENE3D); IPR002557 (G3DSA:2.170.140.GENE3D); IPR002557 (PFAM); IPR001190 (PFAM); PTHR23301 (PANTHER); IPR001190 (PROSITE_PROFILES); IPR002557 (PROSITE_PROFILES); IPR002557 (PROSITE_PROFILES); IPR017448 (SUPERFAMILY); IPR016187 (SUPERFAMILY); IPR002557 (SUPERFAMILY); IPR002557 (SUPERFAMILY)                                                                                                                                                                                                        |
| 354 | c156046_g1_i1_len_235_path_1_0_234_0                      | 0  | isoform b                                  | 74  | 3.22E-17 | 78.80% | 0.116   | IPR024079 (G3DSA:3.40.390.GENE3D); NON_CYTOPLASMIC_DOMAIN (PHOBIUS); CYTOPLASMIC_DOMAIN (PHOBIUS); TRANSMEMBRANE (PHOBIUS); TMhelix (TMHMM)                                                                                                                                                                                                                                                                                                                                                                                                                                                                                      |
| 355 | c15610_g1_i1_len_1640_path_53_0_1639_2                    | 67 | cleavage stimulation factor subunit 1-like | 537 | 0        | 85.70% | 0.302   | IPR001680 (SMART); IPR015943 (G3DSA:2.130.10.GENE3D); IPR001680 (PFAM); PTHR22840:SF8 (PANTHER); PTHR22840 (PANTHER); IPR019775 (PROSITE_PATTERNS); TRANSMEMBRANE (PHOBIUS); NON_CYTOPLASMIC_DOMAIN (PHOBIUS); CYTOPLASMIC_DOMAIN (PHOBIUS); TRANSMEMBRANE (PHOBIUS); NON_CYTOPLASMIC_DOMAIN (PHOBIUS); IPR001680 (PROSITE_PROFILES); IPR001680 (PROSITE_PROFILES); IPR001680 (PROSITE_PROFILES); IPR001680 (PROSITE_PROFILES); IPR017986 (PROSITE_PROFILES); IPR017986 (SUPERFAMILY); TMhelix (TMHMM)                                                                                                                           |
| 356 | c1562_g1_i1_len_686_path_51_0_83_25_84_685_2              | 6  | upf0669 protein c6orf120 homolog           | 228 | 2.27E-37 | 63.30% | 0.187   | PTHR31703 (PANTHER); CYTOPLASMIC_DOMAIN (PHOBIUS); TRANSMEMBRANE (PHOBIUS); NON_CYTOPLASMIC_DOMAIN (PHOBIUS)                                                                                                                                                                                                                                                                                                                                                                                                                                                                                                                     |
| 357 | c1562_g1_i2_len_848_path_51_0_83_134_84_24_5_25_246_847_2 | 7  | upf0669 protein c6orf120 homolog           | 282 | 1.51E-36 | 63.20% | 0.123   | PTHR31703 (PANTHER); TRANSMEMBRANE (PHOBIUS); CYTOPLASMIC_DOMAIN (PHOBIUS); NON_CYTOPLASMIC_DOMAIN (PHOBIUS)                                                                                                                                                                                                                                                                                                                                                                                                                                                                                                                     |
| 358 | c156361_g1_i1_len_410_path_1_0_409_1                      | 3  | protein lap4 isoform x4                    | 137 | 4.40E-68 | 91.00% | 0.138   | IPR003591 (SMART); IPR025875 (PFAM); IPR001611 (PFAM); G3DSA:3.80.10.10 (GENE3D); IPR001611 (PFAM); G3DSA:3.80.10.10 (GENE3D); PTHR23155:SF31 (PANTHER); PTHR23155 (PANTHER); IPR001611 (PROSITE_PROFILES); IPR001611 (PROSITE_PROFILES); IPR001611 (PROSITE_PROFILES); IPR001611 (PROSITE_PROFILES); IPR001611 (PROSITE_PROFILES); SSF52058 (SUPERFAMILY)                                                                                                                                                                                                                                                                       |
| 359 | c156435_g1_i1_len_331_path_1_0_330_0                      | 1  | Usherin                                    | 111 | 1.98E-06 | 59.00% | 0.203   | IPR002049 (SMART); IPR002049 (PFAM); G3DSA:2.10.25.10 (GENE3D); NON_CYTOPLASMIC_DOMAIN (PHOBIUS); TRANSMEMBRANE (PHOBIUS); CYTOPLASMIC_DOMAIN (PHOBIUS); IPR002049 (PROSITE_PROFILES); SSF57196 (SUPERFAMILY); TMhelix (TMHMM)                                                                                                                                                                                                                                                                                                                                                                                                   |





|     |                                           |      |                                                                                                            |     |           |        |         |                                                                                                                                                                                                                                                                                                                                                                                                                                                                                                                                                                                                                                                                                                                                |
|-----|-------------------------------------------|------|------------------------------------------------------------------------------------------------------------|-----|-----------|--------|---------|--------------------------------------------------------------------------------------------------------------------------------------------------------------------------------------------------------------------------------------------------------------------------------------------------------------------------------------------------------------------------------------------------------------------------------------------------------------------------------------------------------------------------------------------------------------------------------------------------------------------------------------------------------------------------------------------------------------------------------|
| 371 | c163171_g1_i1_len_754_path_1_0_753_1      | 21   | hemagglutinin amebocyte aggregation factor-like                                                            | 251 | 3.05E-40  | 62.30% | 0.611 Y | PF14704 (PFAM); IPR026645 (PANTHER); SIGNAL_PEPTIDE (PHOBIUS); SIGNAL_PEPTIDE_C_REGION (PHOBIUS); CYTOPLASMIC_DOMAIN (PHOBIUS); NON_CYTOPLASMIC_DOMAIN (PHOBIUS); SIGNAL_PEPTIDE_N_REGION (PHOBIUS); TRANSMEMBRANE (PHOBIUS); SIGNAL_PEPTIDE_H_REGION (PHOBIUS); SignalP-noTM (SIGNALP_EUK)                                                                                                                                                                                                                                                                                                                                                                                                                                    |
| 372 | c163189_g1_i1_len_2428_path_2408_0_2427_0 | 6946 | hemocyanin subunit type 1 precursor                                                                        | 802 | 0         | 75.70% | 0.421 Y | IPR013788 (PRINTS); IPR000896 (PFAM); IPR005203 (PFAM); IPR005204 (PFAM); IPR008922 (G3DSA:1.10.1280.GENE3D); IPR005203 (G3DSA:2.60.40.GENE3D); IPR005204 (G3DSA:1.20.1370.GENE3D); PTHR11511:SF5 (PANTHER); IPR013788 (PANTHER); IPR013788 (PROSITE_PATTERNS); IPR002227 (PROSITE_PATTERNS); IPR013788 (PROSITE_PATTERNS); NON_CYTOPLASMIC_DOMAIN (PHOBIUS); TRANSMEMBRANE (PHOBIUS); TRANSMEMBRANE (PHOBIUS); NON_CYTOPLASMIC_DOMAIN (PHOBIUS); SIGNAL_PEPTIDE (PHOBIUS); CYTOPLASMIC_DOMAIN (PHOBIUS); SIGNAL_PEPTIDE_N_REGION (PHOBIUS); SIGNAL_PEPTIDE_C_REGION (PHOBIUS); SIGNAL_PEPTIDE_H_REGION (PHOBIUS); IPR014756 (SUPERFAMILY); IPR005204 (SUPERFAMILY); IPR008922 (SUPERFAMILY)                                   |
| 373 | c163202_g1_i1_len_1270_path_1248_0_1269_0 | 47   | phosphatidylinositol -trisphosphate 3-phosphatase and dual-specificity protein phosphatase pten isoform x4 | 417 | 6.88E-123 | 70.90% | 0.118   | IPR003595 (SMART); G3DSA:2.60.40.1110 (GENE3D); IPR029021 (G3DSA:3.90.190.GENE3D); IPR000340 (PFAM); IPR014020 (PFAM); PTHR12305 (PANTHER); IPR016130 (PROSITE_PATTERNS); TRANSMEMBRANE (PHOBIUS); CYTOPLASMIC_DOMAIN (PHOBIUS); NON_CYTOPLASMIC_DOMAIN (PHOBIUS); IPR029023 (PROSITE_PROFILES); IPR014020 (PROSITE_PROFILES); IPR000008 (SUPERFAMILY); IPR029021 (SUPERFAMILY)                                                                                                                                                                                                                                                                                                                                                |
| 374 | c163284_g1_i1_len_1774_path_1752_0_1773_2 | 1156 | serine protease easter-like                                                                                | 585 | 1.66E-71  | 54.70% | 0.307   | IPR001314 (PRINTS); IPR006604 (SMART); IPR001254 (SMART); IPR022700 (PFAM); G3DSA:2.40.10.10 (GENE3D); G3DSA:2.40.10.10 (GENE3D); IPR001254 (PFAM); G3DSA:2.40.10.10 (GENE3D); PTHR24260 (PANTHER); PTHR24260:SF3 (PANTHER); IPR018114 (PROSITE_PATTERNS); IPR018114 (PROSITE_PATTERNS); SIGNAL_PEPTIDE_N_REGION (PHOBIUS); TRANSMEMBRANE (PHOBIUS); SIGNAL_PEPTIDE_C_REGION (PHOBIUS); NON_CYTOPLASMIC_DOMAIN (PHOBIUS); SIGNAL_PEPTIDE (PHOBIUS); TRANSMEMBRANE (PHOBIUS); CYTOPLASMIC_DOMAIN (PHOBIUS); CYTOPLASMIC_DOMAIN (PHOBIUS); TRANSMEMBRANE (PHOBIUS); NON_CYTOPLASMIC_DOMAIN (PHOBIUS); SIGNAL_PEPTIDE_H_REGION (PHOBIUS); IPR001254 (PROSITE_PROFILES); IPR009003 (SUPERFAMILY); TMhelix (TMHMM); TMhelix (TMHMM) |
| 375 | c163461_g1_i1_len_1898_path_1_0_1897_1    | 90   | counting factor associated protein d-like                                                                  | 626 | 0         | 77.90% | 0.105   | IPR000668 (PRINTS); IPR000668 (SMART); IPR013201 (SMART); G3DSA:3.90.70.10 (GENE3D); IPR000668 (PFAM); IPR013201 (PFAM); IPR013128 (PANTHER); PTHR12411:SF284 (PANTHER); IPR025660 (PROSITE_PATTERNS); IPR025661 (PROSITE_PATTERNS); IPR000169 (PROSITE_PATTERNS); SSF54001 (SUPERFAMILY)                                                                                                                                                                                                                                                                                                                                                                                                                                      |
| 376 | c163473_g1_i1_len_494_path_472_0_493_1    | 10   | tyrosine-protein kinase transmembrane receptor ror2                                                        | 165 | 4.88E-67  | 92.20% | 0.112   | IPR001245 (PRINTS); IPR020635 (SMART); IPR001245 (PFAM); G3DSA:1.10.510.10 (GENE3D); PTHR24416 (PANTHER); PTHR24416:SF63 (PANTHER); TRANSMEMBRANE (PHOBIUS); CYTOPLASMIC_DOMAIN (PHOBIUS); NON_CYTOPLASMIC_DOMAIN (PHOBIUS); TRANSMEMBRANE (PHOBIUS); NON_CYTOPLASMIC_DOMAIN (PHOBIUS); TRANSMEMBRANE (PHOBIUS); IPR000719 (PROSITE_PROFILES); IPR011009 (SUPERFAMILY); TMhelix (TMHMM)                                                                                                                                                                                                                                                                                                                                        |
| 377 | c163547_g1_i1_len_1377_path_1_0_1376_4    | 16   | protein                                                                                                    | 459 | 0         | 98.90% | 0.128   | IPR001117 (PFAM); IPR011707 (PFAM); IPR008972 (G3DSA:2.60.40.GENE3D); IPR008972 (G3DSA:2.60.40.GENE3D); IPR011706 (PFAM); PTHR11709:SF2 (PANTHER); PTHR11709 (PANTHER); NON_CYTOPLASMIC_DOMAIN (PHOBIUS); TRANSMEMBRANE (PHOBIUS); CYTOPLASMIC_DOMAIN (PHOBIUS); IPR008972 (SUPERFAMILY); IPR008972 (SUPERFAMILY); IPR008972 (SUPERFAMILY)                                                                                                                                                                                                                                                                                                                                                                                     |
| 378 | c163573_g1_i1_len_1979_path_1_0_1978_0    | 42   | cd109 antigen                                                                                              | 660 | 0         | 64.00% | 0.105   | IPR008930 (G3DSA:1.50.10.GENE3D); IPR011626 (PFAM); PTHR11412:SF85 (PANTHER); PTHR11412 (PANTHER); IPR008930 (SUPERFAMILY)                                                                                                                                                                                                                                                                                                                                                                                                                                                                                                                                                                                                     |
| 379 | c163578_g1_i1_len_351_path_329_0_350_2    | 1    | outer membrane autotransporter barrel domain partial                                                       | 117 | 2.16E-70  | 97.70% | 0.096   | IPR012332 (G3DSA:2.160.20.GENE3D)                                                                                                                                                                                                                                                                                                                                                                                                                                                                                                                                                                                                                                                                                              |

|     |                                           |      |                                                    |      |           |        |       |  |                                                                                                                                                                                                                                                                                                                                                                                                                                                                                                                                                                                                                                                                                                                                                                                                                          |
|-----|-------------------------------------------|------|----------------------------------------------------|------|-----------|--------|-------|--|--------------------------------------------------------------------------------------------------------------------------------------------------------------------------------------------------------------------------------------------------------------------------------------------------------------------------------------------------------------------------------------------------------------------------------------------------------------------------------------------------------------------------------------------------------------------------------------------------------------------------------------------------------------------------------------------------------------------------------------------------------------------------------------------------------------------------|
|     |                                           |      |                                                    |      |           |        |       |  | IPR015880 (SMART); PF13465 (PFAM); PF13894 (PFAM); IPR013087 (G3DSA:3.30.160.GENE3D); IPR013087 (G3DSA:3.30.160.GENE3D); IPR013087 (G3DSA:3.30.160.GENE3D); PTHR24409 (PANTHER); IPR007087 (PROSITE_PATTERNS); IPR007087 (PROSITE_PATTERNS); IPR007087 (PROSITE_PATTERNS); IPR007087 (PROSITE_PATTERNS); IPR007087 (PROSITE_PATTERNS); NON_CYTOPLASMIC_DOMAIN (PHOBIUS); CYTOPLASMIC_DOMAIN (PHOBIUS); TRANSMEMBRANE (PHOBIUS); IPR007087 (PROSITE_PROFILES); IPR007087 (PROSITE_PROFILES); IPR007087 (PROSITE_PROFILES); IPR007087 (PROSITE_PROFILES); IPR007087 (PROSITE_PROFILES); SSF57667 (SUPERFAMILY); SSF57667 (SUPERFAMILY); TMhelix (TMHMM)                                                                                                                                                                    |
| 380 | c163602_g1_i1_len_1086_path_1064_0_1085_5 | 36   | zinc finger protein 658b-like                      | 362  | 5.54E-31  | 57.40% | 0.111 |  | Coil (COILS); IPR020472 (PRINTS); IPR001680 (SMART); IPR006594 (SMART); IPR015943 (G3DSA:2.130.10.GENE3D); IPR001680 (PFAM); IPR006594 (PFAM); PTHR22847 (PANTHER); IPR019775 (PROSITE_PATTERNS); IPR019775 (PROSITE_PATTERNS); IPR019775 (PROSITE_PATTERNS); IPR019775 (PROSITE_PATTERNS); IPR019775 (PROSITE_PATTERNS); IPR019775 (PROSITE_PATTERNS); CYTOPLASMIC_DOMAIN (PHOBIUS); TRANSMEMBRANE (PHOBIUS); NON_CYTOPLASMIC_DOMAIN (PHOBIUS); IPR001680 (PROSITE_PROFILES); IPR001680 (PROSITE_PROFILES); IPR001680 (PROSITE_PROFILES); IPR006594 (PROSITE_PROFILES); IPR001680 (PROSITE_PROFILES); IPR001680 (PROSITE_PROFILES); IPR017252 (HAMAP); IPR017986 (PROSITE_PROFILES); IPR001680 (PROSITE_PROFILES); IPR001680 (PROSITE_PROFILES); IPR017986 (SUPERFAMILY); SSF109925 (SUPERFAMILY)                       |
| 381 | c16368_g1_i1_len_2111_path_2089_0_2110_1  | 1147 | lissencephaly-1 homolog                            | 696  | 0         | 90.90% | 0.171 |  | Coil (COILS); IPR000467 (SMART); IPR000467 (PFAM); PTHR13948 (PANTHER); IPR000467 (PROSITE_PROFILES); IPR007087 (PROSITE_PROFILES)                                                                                                                                                                                                                                                                                                                                                                                                                                                                                                                                                                                                                                                                                       |
| 382 | c163785_g1_i1_len_1861_path_1839_0_1860_3 | 135  | rna-binding protein 5-like                         | 621  | 4.72E-151 | 64.90% | 0.103 |  | IPR000895 (PRINTS); IPR023416 (SMART); IPR014306 (TIGRFAM); IPR023416 (G3DSA:2.60.40.GENE3D); IPR023416 (PFAM); PTHR10395 (PANTHER); PTHR10395:SF8 (PANTHER); IPR023418 (PROSITE_PATTERNS); IPR023416 (SUPERFAMILY)                                                                                                                                                                                                                                                                                                                                                                                                                                                                                                                                                                                                      |
| 383 | c163857_g1_i1_len_1077_path_1_0_1076_2    | 39   | 5-hydroxyisourate hydrolase                        | 354  | 1.84E-33  | 68.20% | 0.1   |  | Coil (COILS); IPR003593 (SMART); IPR000194 (PFAM); IPR000793 (PFAM); IPR027417 (G3DSA:3.40.50.GENE3D); IPR005864 (TIGRFAM); IPR004100 (PFAM); IPR028987 (G3DSA:1.20.5.GENE3D); IPR005722 (TIGRFAM); IPR024034 (G3DSA:1.10.1140.GENE3D); G3DSA:2.40.10.170 (GENE3D); IPR002146 (PFAM); IPR005722 (PTHR15184:PANTHER); PTHR15184 (PANTHER); IPR020003 (PROSITE_PATTERNS); NON_CYTOPLASMIC_DOMAIN (PHOBIUS); CYTOPLASMIC_DOMAIN (PHOBIUS); NON_CYTOPLASMIC_DOMAIN (PHOBIUS); TRANSMEMBRANE (PHOBIUS); NON_CYTOPLASMIC_DOMAIN (PHOBIUS); TRANSMEMBRANE (PHOBIUS); TRANSMEMBRANE (PHOBIUS); TRANSMEMBRANE (PHOBIUS); CYTOPLASMIC_DOMAIN (PHOBIUS); IPR005722 (HAMAP); IPR002146 (HAMAP); IPR027417 (SUPERFAMILY); IPR000793 (SUPERFAMILY); IPR028987 (SUPERFAMILY); IPR004100 (SUPERFAMILY); TMhelix (TMHMM); TMhelix (TMHMM) |
| 384 | c163965_g1_i1_len_6440_path_6418_0_6439_1 | 450  | atp synthase beta subunit                          | 2147 | 0         | 98.90% | 0.206 |  | IPR020472 (PRINTS); IPR001680 (SMART); IPR015943 (G3DSA:2.130.10.GENE3D); IPR015943 (G3DSA:2.130.10.GENE3D); IPR001680 (PFAM); IPR015943 (G3DSA:2.130.10.GENE3D); PTHR22847 (PANTHER); IPR019775 (PROSITE_PATTERNS); IPR001680 (PROSITE_PROFILES); IPR017986 (PROSITE_PROFILES); IPR001680 (PROSITE_PROFILES); IPR017986 (PROSITE_PROFILES); IPR001680 (PROSITE_PROFILES); IPR001680 (PROSITE_PROFILES); IPR001680 (PROSITE_PROFILES); IPR011047 (SUPERFAMILY); IPR017986 (SUPERFAMILY); IPR017986 (SUPERFAMILY)                                                                                                                                                                                                                                                                                                         |
| 385 | c164043_g1_i1_len_2589_path_1_0_2588_2    | 74   | telomerase protein component 1-like                | 863  | 2.39E-36  | 42.10% | 0.101 |  | IPR029052 (G3DSA:3.60.21.GENE3D); PTHR12905 (PANTHER); IPR029052 (SUPERFAMILY)                                                                                                                                                                                                                                                                                                                                                                                                                                                                                                                                                                                                                                                                                                                                           |
| 386 | c164112_g1_i1_len_454_path_1_0_453_1      | 2    | metallophosphoesterase domain-containing protein 1 | 151  | 1.02E-65  | 76.00% | 0.107 |  |                                                                                                                                                                                                                                                                                                                                                                                                                                                                                                                                                                                                                                                                                                                                                                                                                          |

|     |                                                     |     |                                                                   |     |           |        |         |                                                                                                                                                                                                                                                                                                                                                                                                                                                                                                                                                                                                                                                                                                                                                                                                                                                                                                 |
|-----|-----------------------------------------------------|-----|-------------------------------------------------------------------|-----|-----------|--------|---------|-------------------------------------------------------------------------------------------------------------------------------------------------------------------------------------------------------------------------------------------------------------------------------------------------------------------------------------------------------------------------------------------------------------------------------------------------------------------------------------------------------------------------------------------------------------------------------------------------------------------------------------------------------------------------------------------------------------------------------------------------------------------------------------------------------------------------------------------------------------------------------------------------|
| 387 | c164204_g1_i1_len_2138_path_2116_0_2137_1           | 57  | zinc finger protein ozf-like                                      | 705 | 4.78E-28  | 53.00% | 0.174   | IPR015880 (SMART); IPR000210 (SMART); IPR013087 (G3DSA:3.30.160.GENE3D); IPR013087 (G3DSA:3.30.160.GENE3D); PF13912 (PFAM); IPR013069 (PFAM); IPR013087 (G3DSA:3.30.160.GENE3D); G3DSA:3.30.710.10 (GENE3D); PF13465 (PFAM); IPR007087 (PFAM); PTHR24409 (PANTHER); IPR007087 (PROSITE_PATTERNS); IPR007087 (PROSITE_PATTERNS); IPR007087 (PROSITE_PATTERNS); IPR007087 (PROSITE_PATTERNS); IPR007087 (PROSITE_PATTERNS); IPR007087 (PROSITE_PATTERNS); CYTOPLASMIC_DOMAIN (PHOBIUS); NON_CYTOPLASMIC_DOMAIN (PHOBIUS); TRANSMEMBRANE (PHOBIUS); TRANSMEMBRANE (PHOBIUS); NON_CYTOPLASMIC_DOMAIN (PHOBIUS); IPR007087 (PROSITE_PROFILES); IPR007087 (PROSITE_PROFILES); IPR000210 (PROSITE_PROFILES); IPR007087 (PROSITE_PROFILES); IPR007087 (PROSITE_PROFILES); IPR007087 (PROSITE_PROFILES); SSF57667 (SUPERFAMILY); IPR011333 (SUPERFAMILY); SSF57667 (SUPERFAMILY); SSF57667 (SUPERFAMILY) |
| 388 | c164337_g1_i1_len_1647_path_1625_0_1646_0           | 24  | isoform cra_b                                                     | 549 | 1.07E-75  | 78.50% | 0.136   | IPR002290 (SMART); IPR000719 (PFAM); G3DSA:3.30.200.20 (GENE3D); G3DSA:1.10.510.10 (GENE3D); PTHR24348 (PANTHER); IPR017441 (PROSITE_PATTERNS); IPR008271 (PROSITE_PATTERNS); IPR000719 (PROSITE_PROFILES); IPR011009 (SUPERFAMILY)                                                                                                                                                                                                                                                                                                                                                                                                                                                                                                                                                                                                                                                             |
| 389 | c164337_g1_i1_len_1647_path_1625_0_1646_2           | 24  | serine threonine-protein kinase ulk3                              | 549 | 1.74E-93  | 66.50% | 0.417 Y | Coil (COILS); IPR002290 (SMART); IPR007330 (SMART); IPR007330 (G3DSA:1.20.58.GENE3D); IPR007330 (PFAM); G3DSA:1.10.510.10 (GENE3D); IPR000719 (PFAM); IPR007330 (G3DSA:1.20.58.GENE3D); PTHR24348 (PANTHER); IPR000719 (PROSITE_PROFILES); IPR007330 (SUPERFAMILY); IPR011009 (SUPERFAMILY); IPR007330 (SUPERFAMILY)                                                                                                                                                                                                                                                                                                                                                                                                                                                                                                                                                                            |
| 390 | c164501_g1_i1_len_138_path_1_0_137_1                | 0   | chromosome 8 open reading frame isoform cra_a                     | 46  | 6.25E-16  | 87.40% | 0.213   | PTHR22878 (PANTHER)                                                                                                                                                                                                                                                                                                                                                                                                                                                                                                                                                                                                                                                                                                                                                                                                                                                                             |
| 391 | c164501_g1_i1_len_138_path_1_0_137_3                | 0   | polymerase (dna directed) isoform cra_c                           | 46  | 3.65E-19  | 91.00% | 0.548 Y | PR02045 (PRINTS); PTHR12138 (PANTHER); SignalP-noTM (SIGNALP_EUK)                                                                                                                                                                                                                                                                                                                                                                                                                                                                                                                                                                                                                                                                                                                                                                                                                               |
| 392 | c164501_g1_i1_len_138_path_1_0_137_5                | 0   | 5 -nucleotidase domain containing isoform cra_d                   | 46  | 1.41E-15  | 80.80% | 0.176   | PTHR16213 (PANTHER)                                                                                                                                                                                                                                                                                                                                                                                                                                                                                                                                                                                                                                                                                                                                                                                                                                                                             |
| 393 | c164567_g1_i1_len_1464_path_1442_0_1463_0           | 16  | cellulose partial                                                 | 488 | 0         | 98.00% | 0.144   | IPR002037 (PRINTS); IPR012341 (G3DSA:1.50.10.GENE3D); IPR018513 (PFAM); IPR002037 (PFAM); CYTOPLASMIC_DOMAIN (PHOBIUS); NON_CYTOPLASMIC_DOMAIN (PHOBIUS); TRANSMEMBRANE (PHOBIUS); TRANSMEMBRANE (PHOBIUS); NON_CYTOPLASMIC_DOMAIN (PHOBIUS); IPR008928 (SUPERFAMILY); TMhelix (TMHMM); TMhelix (TMHMM)                                                                                                                                                                                                                                                                                                                                                                                                                                                                                                                                                                                         |
| 394 | c164636_g1_i1_len_2828_path_1_0_2827_1              | 96  | peptidoglycan-associated lipoprotein                              | 943 | 1.25E-121 | 99.70% | 0.118   | IPR006664 (PRINTS); IPR014169 (TIGRFAM); IPR006665 (PFAM); IPR006665 (G3DSA:3.30.1330.GENE3D); PTHR30128 (PANTHER); IPR006690 (PROSITE_PATTERNS); TRANSMEMBRANE (PHOBIUS); TRANSMEMBRANE (PHOBIUS); CYTOPLASMIC_DOMAIN (PHOBIUS); SIGNAL_PEPTIDE (PHOBIUS); NON_CYTOPLASMIC_DOMAIN (PHOBIUS); SIGNAL_PEPTIDE_N_REGION (PHOBIUS); NON_CYTOPLASMIC_DOMAIN (PHOBIUS); CYTOPLASMIC_DOMAIN (PHOBIUS); SIGNAL_PEPTIDE_C_REGION (PHOBIUS); TRANSMEMBRANE (PHOBIUS); NON_CYTOPLASMIC_DOMAIN (PHOBIUS); SIGNAL_PEPTIDE_H_REGION (PHOBIUS); TRANSMEMBRANE (PHOBIUS); IPR006665 (PROSITE_PROFILES); IPR006665 (SUPERFAMILY); TMhelix (TMHMM); TMhelix (TMHMM); TMhelix (TMHMM)                                                                                                                                                                                                                             |
| 395 | c164650_g1_i1_len_962_path_940_0_961_1              | 10  | zinc finger protein 160-like                                      | 321 | 7.20E-43  | 58.60% | 0.098   | IPR015880 (SMART); IPR013087 (G3DSA:3.30.160.GENE3D); IPR013087 (G3DSA:3.30.160.GENE3D); PF13465 (PFAM); IPR013087 (G3DSA:3.30.160.GENE3D); PTHR24409 (PANTHER); IPR007087 (PROSITE_PATTERNS); IPR007087 (PROSITE_PATTERNS); IPR007087 (PROSITE_PATTERNS); IPR007087 (PROSITE_PATTERNS); IPR007087 (PROSITE_PATTERNS); CYTOPLASMIC_DOMAIN (PHOBIUS); TRANSMEMBRANE (PHOBIUS); NON_CYTOPLASMIC_DOMAIN (PHOBIUS); IPR007087 (PROSITE_PROFILES); IPR007087 (PROSITE_PROFILES); IPR007087 (PROSITE_PROFILES); IPR007087 (PROSITE_PROFILES); IPR007087 (PROSITE_PROFILES); SSF57667 (SUPERFAMILY); SSF57667 (SUPERFAMILY); SSF57667 (SUPERFAMILY); SSF57667 (SUPERFAMILY); TMhelix (TMHMM)                                                                                                                                                                                                           |
| 396 | c16469_g1_i1_len_1917_path_3691_0_67_1865_68_1916_3 | 174 | a disintegrin and metalloproteinase with thrombospondin motifs 18 | 639 | 2.31E-60  | 55.10% | 0.11    | IPR006586 (SMART); IPR024079 (G3DSA:3.40.390.GENE3D); IPR001590 (PFAM); PTHR13723 (PANTHER); IPR001590 (PROSITE_PROFILES); SSF55486 (SUPERFAMILY)                                                                                                                                                                                                                                                                                                                                                                                                                                                                                                                                                                                                                                                                                                                                               |
| 397 | c16469_g1_i2_len_1868_path_1846_0_18_1865_19_1867_3 | 173 | a disintegrin and metalloproteinase with thrombospondin motifs 18 | 617 | 1.39E-60  | 55.10% | 0.11    | IPR006586 (SMART); IPR024079 (G3DSA:3.40.390.GENE3D); IPR001590 (PFAM); PTHR13723 (PANTHER); IPR001590 (PROSITE_PROFILES); SSF55486 (SUPERFAMILY)                                                                                                                                                                                                                                                                                                                                                                                                                                                                                                                                                                                                                                                                                                                                               |





[illegible]

|     |                                           |     |                                                              |     |           |        |       |                                                                                                                                                                                                                                                                                                                                                                                                                                                                                                                                                                                                                                                                                                                      |
|-----|-------------------------------------------|-----|--------------------------------------------------------------|-----|-----------|--------|-------|----------------------------------------------------------------------------------------------------------------------------------------------------------------------------------------------------------------------------------------------------------------------------------------------------------------------------------------------------------------------------------------------------------------------------------------------------------------------------------------------------------------------------------------------------------------------------------------------------------------------------------------------------------------------------------------------------------------------|
| 413 | c166157_g1_i1_len_619_path_597_0_618_0    | 4   | lipophorin receptor                                          | 207 | 3.30E-82  | 73.50% | 0.127 | IPR002172 (PRINTS); IPR002172 (SMART); IPR000742 (SMART); IPR001881 (SMART); IPR002172 (G3DSA:4.10.400.GENE3D); G3DSA:2.10.25.10 (GENE3D); G3DSA:2.10.25.10 (GENE3D); IPR001881 (PFAM); IPR002172 (G3DSA:4.10.400.GENE3D); IPR002172 (PFAM); IPR002172 (G3DSA:4.10.400.GENE3D); PF14670 (PFAM); PTHR10529:SF208 (PANTHER); PTHR10529 (PANTHER); IPR023415 (PROSITE_PATTERNS); IPR018097 (PROSITE_PATTERNS); IPR023415 (PROSITE_PATTERNS); IPR002172 (PROSITE_PROFILES); IPR002172 (PROSITE_PROFILES); IPR002172 (PROSITE_PROFILES); SSF57196 (SUPERFAMILY); IPR002172 (SUPERFAMILY); SSF57196 (SUPERFAMILY); IPR002172 (SUPERFAMILY); IPR002172 (SUPERFAMILY)                                                        |
| 414 | c166162_g1_i1_len_1047_path_1025_0_1046_2 | 11  | oocyte zinc finger protein xlc0f22                           | 349 | 3.18E-19  | 53.10% | 0.098 | IPR015880 (SMART); IPR013087 (G3DSA:3.30.160.GENE3D); PF13465 (PFAM); IPR007087 (PFAM); IPR013087 (G3DSA:3.30.160.GENE3D); PTHR24409 (PANTHER); PTHR24409:SF13 (PANTHER); IPR007087 (PROSITE_PATTERNS); IPR007087 (PROSITE_PATTERNS); TRANSMEMBRANE (PHOBIUS); TRANSMEMBRANE (PHOBIUS); CYTOPLASMIC_DOMAIN (PHOBIUS); TRANSMEMBRANE (PHOBIUS); TRANSMEMBRANE (PHOBIUS); CYTOPLASMIC_DOMAIN (PHOBIUS); NON_CYTOPLASMIC_DOMAIN (PHOBIUS); CYTOPLASMIC_DOMAIN (PHOBIUS); NON_CYTOPLASMIC_DOMAIN (PHOBIUS); IPR007087 (PROSITE_PROFILES); IPR007087 (PROSITE_PROFILES); IPR007087 (PROSITE_PROFILES); SSF57667 (SUPERFAMILY); SSF57667 (SUPERFAMILY); TMhelix (TMHMM); TMhelix (TMHMM); TMhelix (TMHMM); TMhelix (TMHMM) |
| 415 | c166233_g1_i1_len_1107_path_1085_0_1106_1 | 14  | short-chain dehydrogenase reductase family 16c member 6-like | 369 | 1.79E-34  | 73.90% | 0.142 | IPR002347 (PRINTS); IPR002198 (PFAM); IPR016040 (G3DSA:3.40.50.GENE3D); PTHR24316:SF214 (PANTHER); PTHR24316 (PANTHER); NON_CYTOPLASMIC_DOMAIN (PHOBIUS); TRANSMEMBRANE (PHOBIUS); TRANSMEMBRANE (PHOBIUS); TRANSMEMBRANE (PHOBIUS); CYTOPLASMIC_DOMAIN (PHOBIUS); TRANSMEMBRANE (PHOBIUS); NON_CYTOPLASMIC_DOMAIN (PHOBIUS); CYTOPLASMIC_DOMAIN (PHOBIUS); NON_CYTOPLASMIC_DOMAIN (PHOBIUS); SSF51735 (SUPERFAMILY); TMhelix (TMHMM); TMhelix (TMHMM); TMhelix (TMHMM); TMhelix (TMHMM)                                                                                                                                                                                                                             |
| 416 | c166247_g1_i1_len_1231_path_1_0_1230_2    | 32  | fukutin-related partial                                      | 410 | 1.20E-26  | 72.00% | 0.286 | IPR007074 (PFAM); PTHR13627:SF25 (PANTHER); PTHR13627 (PANTHER); TRANSMEMBRANE (PHOBIUS); CYTOPLASMIC_DOMAIN (PHOBIUS); CYTOPLASMIC_DOMAIN (PHOBIUS); TRANSMEMBRANE (PHOBIUS); NON_CYTOPLASMIC_DOMAIN (PHOBIUS); NON_CYTOPLASMIC_DOMAIN (PHOBIUS); TRANSMEMBRANE (PHOBIUS); TMhelix (TMHMM); TMhelix (TMHMM)                                                                                                                                                                                                                                                                                                                                                                                                         |
| 417 | c166254_g1_i1_len_1700_path_1_0_1699_0    | 102 | aael005189- partial                                          | 561 | 3.87E-128 | 69.30% | 0.129 | IPR003112 (SMART); IPR003112 (PFAM); PTHR23192 (PANTHER); PTHR23192:SF33 (PANTHER); NON_CYTOPLASMIC_DOMAIN (PHOBIUS); CYTOPLASMIC_DOMAIN (PHOBIUS); TRANSMEMBRANE (PHOBIUS); IPR003112 (PROSITE_PROFILES); TMhelix (TMHMM); TMhelix (TMHMM)                                                                                                                                                                                                                                                                                                                                                                                                                                                                          |
| 418 | c166307_g1_i1_len_1202_path_1180_0_1201_1 | 17  | partial                                                      | 401 | 4.62E-152 | 99.50% | 0.123 | IPR017849 (G3DSA:3.40.720.GENE3D); IPR000917 (PFAM); PTHR10342 (PANTHER); PTHR10342:SF22 (PANTHER); IPR024607 (PROSITE_PATTERNS); IPR024607 (PROSITE_PATTERNS); IPR017850 (SUPERFAMILY)                                                                                                                                                                                                                                                                                                                                                                                                                                                                                                                              |
| 419 | c166657_g1_i1_len_705_path_1_0_704_1      | 6   | adhesive serine protease                                     | 235 | 2.89E-26  | 67.30% | 0.12  | IPR001254 (SMART); IPR001254 (PFAM); G3DSA:2.40.10.10 (GENE3D); PTHR24256 (PANTHER); IPR018114 (PROSITE_PATTERNS); IPR001254 (PROSITE_PROFILES); IPR009003 (SUPERFAMILY)                                                                                                                                                                                                                                                                                                                                                                                                                                                                                                                                             |
| 420 | c166657_g1_i1_len_705_path_1_0_704_2      | 6   | trypsin- partial                                             | 235 | 5.87E-12  | 73.40% | 0.15  | G3DSA:2.40.10.10 (GENE3D); IPR001254 (PFAM); PTHR24258 (PANTHER); PTHR24258:SF4 (PANTHER); IPR009003 (SUPERFAMILY)                                                                                                                                                                                                                                                                                                                                                                                                                                                                                                                                                                                                   |
| 421 | c166681_g1_i1_len_816_path_1_0_815_5      | 12  | xanthine dehydrogenase oxidase                               | 272 | 1.60E-20  | 85.70% | 0.099 | IPR008274 (PFAM); IPR008274 (G3DSA:3.30.365.GENE3D); PTHR11908:SF32 (PANTHER); PTHR11908 (PANTHER); IPR008274 (SUPERFAMILY)                                                                                                                                                                                                                                                                                                                                                                                                                                                                                                                                                                                          |
| 422 | c166891_g1_i1_len_956_path_1_0_955_4      | 19  | collagen alpha 1 chain                                       | 319 | 9.73E-57  | 55.70% | 0.12  | IPR016186 (G3DSA:3.10.100.GENE3D); IPR010515 (PFAM); PTHR24023 (PANTHER); IPR026917 (PTHR24023:PANTHER); NON_CYTOPLASMIC_DOMAIN (PHOBIUS); CYTOPLASMIC_DOMAIN (PHOBIUS); TRANSMEMBRANE (PHOBIUS); IPR016187 (SUPERFAMILY); TMhelix (TMHMM)                                                                                                                                                                                                                                                                                                                                                                                                                                                                           |
| 423 | c166969_g1_i1_len_1251_path_1229_0_1250_1 | 23  | prolyl 3-hydroxylase 2-like isoform x1                       | 417 | 3.03E-105 | 68.90% | 0.107 | Coil (COILS); IPR006620 (SMART); IPR005123 (PFAM); PTHR14049 (PANTHER); PTHR14049:SF9 (PANTHER); IPR005123 (PROSITE_PROFILES)                                                                                                                                                                                                                                                                                                                                                                                                                                                                                                                                                                                        |

|     |                                           |    |                                     |     |           |        |       |                                                                                                                                                                                                                                                                                                                                                                                                                                                                                                                                                                                                                                                                                  |
|-----|-------------------------------------------|----|-------------------------------------|-----|-----------|--------|-------|----------------------------------------------------------------------------------------------------------------------------------------------------------------------------------------------------------------------------------------------------------------------------------------------------------------------------------------------------------------------------------------------------------------------------------------------------------------------------------------------------------------------------------------------------------------------------------------------------------------------------------------------------------------------------------|
| 424 | c167092_g1_i1_len_1486_path_1_0_1485_2    | 68 | 3-ketodihydrosphingosine reductase  | 495 | 3.10E-119 | 71.70% | 0.117 | IPR002198 (PRINTS); IPR002347 (PRINTS); IPR016040 (G3DSA:3.40.50.GENE3D); IPR002198 (PFAM); PTHR24320 (PANTHER); PTHR24320:SF1 (PANTHER); IPR020904 (PROSITE_PATTERNS); TRANSMEMBRANE (PHOBIUS); CYTOPLASMIC_DOMAIN (PHOBIUS); TRANSMEMBRANE (PHOBIUS); NON_CYTOPLASMIC_DOMAIN (PHOBIUS); NON_CYTOPLASMIC_DOMAIN (PHOBIUS); TRANSMEMBRANE (PHOBIUS); CYTOPLASMIC_DOMAIN (PHOBIUS); TRANSMEMBRANE (PHOBIUS); NON_CYTOPLASMIC_DOMAIN (PHOBIUS); SSF51735 (SUPERFAMILY); TMhelix (TMHMM)                                                                                                                                                                                            |
| 425 | c167139_g1_i1_len_1415_path_1_0_1414_5    | 31 | tight junction protein zo-3         | 466 | 3.09E-42  | 73.50% | 0.1   | Coil (COILS); IPR001478 (SMART); IPR001478 (G3DSA:2.30.42.GENE3D); IPR001478 (PFAM); PTHR19964:SF22 (PANTHER); PTHR19964 (PANTHER); IPR001478 (PROSITE_PROFILES); IPR001478 (SUPERFAMILY)                                                                                                                                                                                                                                                                                                                                                                                                                                                                                        |
| 426 | c167153_g1_i1_len_248_path_226_0_247_5    | 0  | zinc finger protein                 | 82  | 1.23E-13  | 58.70% | 0.097 | IPR015880 (SMART); IPR007087 (PFAM); IPR013087 (G3DSA:3.30.160.GENE3D); PF13894 (PFAM); PTHR24409 (PANTHER); PTHR24409:SF14 (PANTHER); IPR007087 (PROSITE_PATTERNS); IPR007087 (PROSITE_PATTERNS); IPR007087 (PROSITE_PROFILES); IPR007087 (PROSITE_PROFILES); SSF57667 (SUPERFAMILY)                                                                                                                                                                                                                                                                                                                                                                                            |
| 427 | c167480_g1_i1_len_631_path_1_0_630_2      | 17 | protein bv8                         | 210 | 2.60E-20  | 59.30% | 0.191 | G3DSA:2.10.80.10 (GENE3D)                                                                                                                                                                                                                                                                                                                                                                                                                                                                                                                                                                                                                                                        |
| 428 | c167578_g1_i1_len_1656_path_1634_0_1655_0 | 92 | serine protease mitochondrial       | 547 | 3.10E-130 | 73.50% | 0.296 | IPR001940 (PRINTS); IPR001478 (SMART); G3DSA:2.40.10.10 (GENE3D); G3DSA:2.40.10.10 (GENE3D); PF13365 (PFAM); IPR001478 (PFAM); IPR001478 (G3DSA:2.30.42.GENE3D); PTHR22939:SF69 (PANTHER); PTHR22939 (PANTHER); SIGNAL_PEPTIDE (PHOBIUS); SIGNAL_PEPTIDE_H_REGION (PHOBIUS); SIGNAL_PEPTIDE_N_REGION (PHOBIUS); SIGNAL_PEPTIDE_C_REGION (PHOBIUS); NON_CYTOPLASMIC_DOMAIN (PHOBIUS); TRANSMEMBRANE (PHOBIUS); CYTOPLASMIC_DOMAIN (PHOBIUS); IPR001478 (PROSITE_PROFILES); IPR009003 (SUPERFAMILY); IPR001478 (SUPERFAMILY)                                                                                                                                                       |
| 429 | c167628_g1_i1_len_1263_path_1_0_1262_0    | 26 | dipeptidyl peptidase 1 isoform x1   | 421 | 4.27E-164 | 70.00% | 0.208 | IPR000668 (PRINTS); IPR000668 (SMART); G3DSA:3.90.70.10 (GENE3D); IPR014882 (G3DSA:2.40.128.GENE3D); IPR014882 (PFAM); IPR000668 (PFAM); IPR013128 (PANTHER); PTHR12411:SF314 (PANTHER); IPR000169 (PROSITE_PATTERNS); IPR025660 (PROSITE_PATTERNS); NON_CYTOPLASMIC_DOMAIN (PHOBIUS); CYTOPLASMIC_DOMAIN (PHOBIUS); TRANSMEMBRANE (PHOBIUS); SSF54001 (SUPERFAMILY); IPR014882 (SUPERFAMILY); TMhelix (TMHMM)                                                                                                                                                                                                                                                                   |
| 430 | c167713_g1_i1_len_629_path_1_0_628_4      | 11 | inner membrane lipoprotein yiad     | 210 | 1.56E-136 | 99.90% | 0.278 | IPR006664 (PRINTS); IPR006665 (PFAM); PF13488 (PFAM); IPR006665 (G3DSA:3.30.1330.GENE3D); PTHR30128 (PANTHER); PTHR30128:SF0 (PANTHER); IPR006690 (PROSITE_PATTERNS); TRANSMEMBRANE (PHOBIUS); NON_CYTOPLASMIC_DOMAIN (PHOBIUS); NON_CYTOPLASMIC_DOMAIN (PHOBIUS); CYTOPLASMIC_DOMAIN (PHOBIUS); TRANSMEMBRANE (PHOBIUS); IPR006665 (PROSITE_PROFILES); SignalIP-TM (SIGNALP_GRAM_POSITIVE); IPR006665 (SUPERFAMILY); TMhelix (TMHMM); TMhelix (TMHMM); TMhelix (TMHMM)                                                                                                                                                                                                          |
| 431 | c167809_g1_i1_len_1718_path_1696_0_1717_4 | 41 | chondroitin sulfate synthase 1-like | 573 | 2.80E-86  | 53.00% | 0.279 | IPR008428 (PFAM); IPR029044 (G3DSA:3.90.550.GENE3D); PTHR12369:SF11 (PANTHER); PTHR12369 (PANTHER); TRANSMEMBRANE (PHOBIUS); CYTOPLASMIC_DOMAIN (PHOBIUS); TRANSMEMBRANE (PHOBIUS); CYTOPLASMIC_DOMAIN (PHOBIUS); NON_CYTOPLASMIC_DOMAIN (PHOBIUS); IPR029044 (SUPERFAMILY); TMhelix (TMHMM)                                                                                                                                                                                                                                                                                                                                                                                     |
| 432 | c168114_g1_i1_len_709_path_687_0_708_0    | 8  | vitellogenin receptor               | 237 | 7.14E-44  | 56.70% | 0.104 | IPR002172 (PRINTS); IPR000742 (SMART); IPR001881 (SMART); IPR002172 (SMART); IPR002172 (G3DSA:4.10.400.GENE3D); IPR011042 (G3DSA:2.120.10.GENE3D); IPR001881 (PFAM); IPR002172 (PFAM); IPR002172 (G3DSA:4.10.400.GENE3D); G3DSA:2.10.25.10 (GENE3D); G3DSA:2.10.25.10 (GENE3D); PTHR10529:SF204 (PANTHER); PTHR10529 (PANTHER); IPR000152 (PROSITE_PATTERNS); IPR023415 (PROSITE_PATTERNS); IPR018097 (PROSITE_PATTERNS); IPR013032 (PROSITE_PATTERNS); IPR013032 (PROSITE_PATTERNS); IPR023415 (PROSITE_PATTERNS); IPR002172 (PROSITE_PROFILES); IPR002172 (PROSITE_PROFILES); IPR002172 (SUPERFAMILY); SSF57196 (SUPERFAMILY); SSF57196 (SUPERFAMILY); IPR002172 (SUPERFAMILY) |

|     |                                                                                                   |    |                                                           |     |          |        |       |                                                                                                                                                                                                                                                                                                                                                                                                                                                           |
|-----|---------------------------------------------------------------------------------------------------|----|-----------------------------------------------------------|-----|----------|--------|-------|-----------------------------------------------------------------------------------------------------------------------------------------------------------------------------------------------------------------------------------------------------------------------------------------------------------------------------------------------------------------------------------------------------------------------------------------------------------|
| 433 | c168235_g1_i1_len_581_path_559_0_580_5                                                            | 4  | xanthine dehydrogenase                                    | 193 | 1.02E-80 | 76.60% | 0.115 | IPR008274 (G3DSA:3.30.365.GENE3D); IPR008274 (PFAM); IPR008274 (G3DSA:3.30.365.GENE3D); IPR008274 (G3DSA:3.30.365.GENE3D); PTHR11908:SF32 (PANTHER); PTHR11908 (PANTHER); IPR008274 (SUPERFAMILY)                                                                                                                                                                                                                                                         |
| 434 | c168636_g1_i1_len_656_path_634_0_655_4                                                            | 4  | zinc finger protein 883-like isoform x1                   | 219 | 2.13E-20 | 53.30% | 0.147 | IPR015880 (SMART); IPR013087 (G3DSA:3.30.160.GENE3D); IPR013087 (G3DSA:3.30.160.GENE3D); PF13465 (PFAM); IPR013087 (G3DSA:3.30.160.GENE3D); PTHR24375 (PANTHER); IPR007087 (PROSITE_PATTERNS); IPR007087 (PROSITE_PATTERNS); IPR007087 (PROSITE_PATTERNS); IPR007087 (PROSITE_PROFILES); IPR007087 (PROSITE_PROFILES); IPR007087 (PROSITE_PROFILES); IPR007087 (PROSITE_PROFILES); SSF57667 (SUPERFAMILY); SSF57667 (SUPERFAMILY); SSF57667 (SUPERFAMILY) |
| 435 | c16878_g1_i1_len_636_path_2835_0_17_2222_1_8_635_4                                                | 12 | 26s protease regulatory subunit 8                         | 212 | 6.95E-90 | 95.90% | 0.265 | Coil (COILS); IPR027417 (G3DSA:3.40.50.GENE3D); PTHR23073:SF12 (PANTHER); PTHR23073 (PANTHER); IPR027417 (SUPERFAMILY)                                                                                                                                                                                                                                                                                                                                    |
| 436 | c16878_g1_i2_len_1431_path_1409_0_812_2222_813_1430_4                                             | 49 | 26s protease regulatory subunit 8                         | 477 | 0        | 98.00% | 0.265 | Coil (COILS); IPR003593 (SMART); IPR005937 (TIGRFAM); G3DSA:1.10.8.60 (GENE3D); IPR003959 (PFAM); IPR027417 (G3DSA:3.40.50.GENE3D); PTHR23073 (PANTHER); PTHR23073:SF12 (PANTHER); IPR003960 (PROSITE_PATTERNS); IPR027417 (SUPERFAMILY)                                                                                                                                                                                                                  |
| 437 | c16885_g1_i1_len_1184_path_1979_0_278_2240_279_280_1163_281_1009_1892_1010_1096_18_92_1097_1183_3 | 25 | zinc c2h2 type domain-containing protein                  | 390 | 8.68E-21 | 55.70% | 0.101 | IPR015880 (SMART); PF13465 (PFAM); IPR007087 (PFAM); IPR013087 (G3DSA:3.30.160.GENE3D); PTHR24409:SF14 (PANTHER); PTHR24409 (PANTHER); IPR007087 (PROSITE_PATTERNS); IPR007087 (PROSITE_PATTERNS); IPR007087 (PROSITE_PATTERNS); IPR007087 (PROSITE_PROFILES); IPR007087 (PROSITE_PROFILES); IPR007087 (PROSITE_PROFILES); IPR007087 (PROSITE_PROFILES); SSF57667 (SUPERFAMILY); SSF57667 (SUPERFAMILY)                                                   |
| 438 | c168938_g1_i1_len_1339_path_20_0_1338_2                                                           | 8  | protease 3                                                | 446 | 0        | 99.10% | 0.101 | IPR011237 (G3DSA:3.30.830.GENE3D); IPR011237 (G3DSA:3.30.830.GENE3D); IPR007863 (PFAM); PTHR11851 (PANTHER); PTHR11851:SF85 (PANTHER); IPR011249 (SUPERFAMILY); IPR011249 (SUPERFAMILY); IPR011249 (SUPERFAMILY)                                                                                                                                                                                                                                          |
| 439 | c16904_g1_i1_len_225_path_71_0_85_155_86_2_24_0                                                   | 0  | chitinase partial                                         | 75  | 2.64E-16 | 62.70% | 0.114 | IPR001223 (PFAM); IPR013781 (G3DSA:3.20.20.GENE3D); PTHR11177:SF112 (PANTHER); PTHR11177 (PANTHER); IPR017853 (SUPERFAMILY)                                                                                                                                                                                                                                                                                                                               |
| 440 | c169362_g1_i1_len_810_path_788_0_809_2                                                            | 7  | pdz domain-containing protein 2                           | 270 | 3.38E-29 | 85.50% | 0.17  | IPR001478 (SMART); IPR001478 (G3DSA:2.30.42.GENE3D); IPR001478 (PFAM); PTHR19964 (PANTHER); PTHR19964:SF22 (PANTHER); IPR001478 (PROSITE_PROFILES); IPR001478 (SUPERFAMILY)                                                                                                                                                                                                                                                                               |
| 441 | c16944_g1_i1_len_1709_path_107_0_711_818_7_12_713_106_714_1708_1                                  | 71 | sepiapterin reductase-like                                | 570 | 2.21E-80 | 63.70% | 0.112 | IPR002347 (PRINTS); IPR006393 (TIGRFAM); IPR002198 (PFAM); IPR016040 (G3DSA:3.40.50.GENE3D); PTHR24318:SF1 (PANTHER); PTHR24318 (PANTHER); TRANSMEMBRANE (PHOBIUS); CYTOPLASMIC_DOMAIN (PHOBIUS); NON_CYTOPLASMIC_DOMAIN (PHOBIUS); SSF51735 (SUPERFAMILY)                                                                                                                                                                                                |
| 442 | c169480_g1_i1_len_568_path_546_0_567_1                                                            | 27 | sterile alpha motif domain-containing protein 13          | 184 | 3.64E-12 | 85.30% | 0.119 | IPR013761 (G3DSA:1.10.150.GENE3D); IPR021129 (PFAM); PTHR12247 (PANTHER); PTHR12247:SF66 (PANTHER); CYTOPLASMIC_DOMAIN (PHOBIUS); NON_CYTOPLASMIC_DOMAIN (PHOBIUS); TRANSMEMBRANE (PHOBIUS); IPR013761 (SUPERFAMILY); TMhelix (TMHMM)                                                                                                                                                                                                                     |
| 443 | c169507_g1_i1_len_842_path_1_0_841_5                                                              | 13 | thioredoxin domain-containing protein 11                  | 280 | 1.09E-38 | 54.80% | 0.146 | IPR012336 (G3DSA:3.40.30.GENE3D); IPR013766 (PFAM); PTHR18929:SF61 (PANTHER); PTHR18929 (PANTHER); IPR012336 (SUPERFAMILY); TMhelix (TMHMM)                                                                                                                                                                                                                                                                                                               |
| 444 | c169557_g1_i1_len_358_path_1_0_357_2                                                              | 2  | heat shock protein 70 b2                                  | 119 | 1.50E-27 | 76.40% | 0.105 | IPR029048 (G3DSA:1.20.1270.GENE3D); PTHR19375 (PANTHER); PTHR19375:SF142 (PANTHER); IPR029048 (SUPERFAMILY)                                                                                                                                                                                                                                                                                                                                               |
| 445 | c169560_g1_i1_len_800_path_1_0_799_0                                                              | 73 | trafficking protein particle complex subunit 1 isoform x1 | 262 | 7.57E-07 | 71.00% | 0.231 | IPR007233 (PFAM)                                                                                                                                                                                                                                                                                                                                                                                                                                          |
| 446 | c169637_g1_i1_len_278_path_256_0_277_2                                                            | 0  | cysteine-rich secretory protein 2-like isoform x1         | 92  | 3.03E-45 | 79.40% | 0.139 | IPR014044 (SMART); IPR014044 (G3DSA:3.40.33.GENE3D); IPR001283 (PANTHER); PTHR10334:SF188 (PANTHER); IPR014044 (SUPERFAMILY)                                                                                                                                                                                                                                                                                                                              |

|     |                                           |     |                                                               |     |           |        |         |                                                                                                                                                                                                                                                                                                                                                                                                                                                                                                                                                                                                                                                                                                                                                                                                          |
|-----|-------------------------------------------|-----|---------------------------------------------------------------|-----|-----------|--------|---------|----------------------------------------------------------------------------------------------------------------------------------------------------------------------------------------------------------------------------------------------------------------------------------------------------------------------------------------------------------------------------------------------------------------------------------------------------------------------------------------------------------------------------------------------------------------------------------------------------------------------------------------------------------------------------------------------------------------------------------------------------------------------------------------------------------|
| 447 | c169643_g1_i1_len_954_path_1_0_953_4      | 9   | carbonic anhydrase-related protein 10                         | 318 | 3.62E-51  | 84.10% | 0.124   | IPR001148 (SMART); IPR001148 (G3DSA:3.10.200.GENE3D); IPR001148 (PFAM); IPR023561 (PANTHER); PTHR18952:SF85 (PANTHER); TRANSMEMBRANE (PHOBIUS); CYTOPLASMIC_DOMAIN (PHOBIUS); NON_CYTOPLASMIC_DOMAIN (PHOBIUS); TRANSMEMBRANE (PHOBIUS); TRANSMEMBRANE (PHOBIUS); NON_CYTOPLASMIC_DOMAIN (PHOBIUS); CYTOPLASMIC_DOMAIN (PHOBIUS); TRANSMEMBRANE (PHOBIUS); NON_CYTOPLASMIC_DOMAIN (PHOBIUS); IPR001148 (PROSITE_PROFILES); IPR001148 (SUPERFAMILY); TMhelix (TMHMM); TMhelix (TMHMM); TMhelix (TMHMM)                                                                                                                                                                                                                                                                                                    |
| 448 | c169698_g1_i1_len_691_path_1_0_690_2      | 11  | serine-aspartate repeat protein f                             | 230 | 3.98E-12  | 64.10% | 0.109   | TRANSMEMBRANE (PHOBIUS); CYTOPLASMIC_DOMAIN (PHOBIUS); NON_CYTOPLASMIC_DOMAIN (PHOBIUS)                                                                                                                                                                                                                                                                                                                                                                                                                                                                                                                                                                                                                                                                                                                  |
| 449 | c169698_g1_i1_len_691_path_1_0_690_3      | 11  | collagen alpha-1 chain                                        | 231 | 1.46E-13  | 69.90% | 0.357 Y | IPR008160 (PFAM); TRANSMEMBRANE (PHOBIUS); CYTOPLASMIC_DOMAIN (PHOBIUS); NON_CYTOPLASMIC_DOMAIN (PHOBIUS); TRANSMEMBRANE (PHOBIUS); TRANSMEMBRANE (PHOBIUS); NON_CYTOPLASMIC_DOMAIN (PHOBIUS); CYTOPLASMIC_DOMAIN (PHOBIUS); TMhelix (TMHMM); TMhelix (TMHMM)                                                                                                                                                                                                                                                                                                                                                                                                                                                                                                                                            |
| 450 | c169979_g1_i1_len_2422_path_1_0_2421_0    | 137 | polypeptide n-acetylgalactosaminyltransferase 5 isoform x2    | 802 | 0         | 88.70% | 0.124   | IPR000772 (SMART); IPR029044 (G3DSA:3.90.550.GENE3D); G3DSA:2.80.10.50 (GENE3D); IPR001173 (PFAM); IPR000772 (PFAM); PTHR11675:SF39 (PANTHER); PTHR11675 (PANTHER); NON_CYTOPLASMIC_DOMAIN (PHOBIUS); CYTOPLASMIC_DOMAIN (PHOBIUS); TRANSMEMBRANE (PHOBIUS); IPR000772 (PROSITE_PROFILES); IPR029044 (SUPERFAMILY); IPR000772 (SUPERFAMILY); TMhelix (TMHMM); TMhelix (TMHMM)                                                                                                                                                                                                                                                                                                                                                                                                                            |
| 451 | c169998_g1_i1_len_953_path_931_0_952_3    | 7   | beta-d- partial                                               | 318 | 0         | 99.80% | 0.115   | IPR006101 (PRINTS); IPR008979 (G3DSA:2.60.120.GENE3D); IPR006103 (PFAM); IPR013812 (G3DSA:2.60.40.GENE3D); IPR006104 (PFAM); IPR013781 (G3DSA:3.20.20.GENE3D); IPR006102 (PFAM); PTHR10066 (PANTHER); PTHR10066:SF58 (PANTHER); IPR023232 (PROSITE_PATTERNS); IPR023230 (PROSITE_PATTERNS); IPR008979 (SUPERFAMILY); IPR017853 (SUPERFAMILY); IPR006102 (SUPERFAMILY)                                                                                                                                                                                                                                                                                                                                                                                                                                    |
| 452 | c170015_g1_i1_len_1704_path_1_0_1703_1    | 30  | zinc finger protein 436-like isoform x2                       | 568 | 5.66E-42  | 59.80% | 0.103   | IPR000210 (SMART); IPR015880 (SMART); G3DSA:3.30.710.10 (GENE3D); IPR013087 (G3DSA:3.30.160.GENE3D); PF13465 (PFAM); IPR013087 (G3DSA:3.30.160.GENE3D); IPR013069 (PFAM); PTHR24409 (PANTHER); IPR007087 (PROSITE_PATTERNS); IPR007087 (PROSITE_PATTERNS); IPR007087 (PROSITE_PATTERNS); IPR007087 (PROSITE_PATTERNS); IPR007087 (PROSITE_PATTERNS); IPR007087 (PROSITE_PATTERNS); NON_CYTOPLASMIC_DOMAIN (PHOBIUS); TRANSMEMBRANE (PHOBIUS); CYTOPLASMIC_DOMAIN (PHOBIUS); IPR007087 (PROSITE_PROFILES); IPR007087 (PROSITE_PROFILES); IPR007087 (PROSITE_PROFILES); IPR007087 (PROSITE_PROFILES); IPR007087 (PROSITE_PROFILES); IPR000210 (PROSITE_PROFILES); SSF57667 (SUPERFAMILY); SSF57667 (SUPERFAMILY); SSF57667 (SUPERFAMILY); SSF57667 (SUPERFAMILY); IPR011333 (SUPERFAMILY); TMhelix (TMHMM) |
| 453 | c170298_g1_i1_len_1319_path_1297_0_1318_5 | 22  | fat-like cadherin-related tumor suppressor homolog isoform x1 | 439 | 9.65E-144 | 76.20% | 0.165   | IPR002126 (PRINTS); IPR002126 (SMART); IPR002126 (PFAM); IPR002126 (G3DSA:2.60.40.GENE3D); IPR002126 (G3DSA:2.60.40.GENE3D); PTHR24026:SF39 (PANTHER); PTHR24026 (PANTHER); IPR020894 (PROSITE_PATTERNS); NON_CYTOPLASMIC_DOMAIN (PHOBIUS); CYTOPLASMIC_DOMAIN (PHOBIUS); TRANSMEMBRANE (PHOBIUS); IPR002126 (PROSITE_PROFILES); IPR002126 (PROSITE_PROFILES); IPR002126 (PROSITE_PROFILES); IPR015919 (SUPERFAMILY); IPR015919 (SUPERFAMILY); IPR015919 (SUPERFAMILY); TMhelix (TMHMM)                                                                                                                                                                                                                                                                                                                  |
| 454 | c170333_g1_i1_len_469_path_1_0_468_2      | 5   | diuretic hormone class 2 isoform x1                           | 156 | 3.80E-18  | 92.60% | 0.153   | no IPS match                                                                                                                                                                                                                                                                                                                                                                                                                                                                                                                                                                                                                                                                                                                                                                                             |
| 455 | c1706_g2_i1_len_295_path_1303_0_294_2     | 0   | protein disulfide-isomerase tmx3 isoform x1                   | 98  | 7.72E-38  | 78.00% | 0.737 Y | PR00421 (PRINTS); IPR012336 (G3DSA:3.40.30.GENE3D); IPR013766 (PFAM); PTHR18929:SF82 (PANTHER); PTHR18929 (PANTHER); IPR017937 (PROSITE_PATTERNS); SIGNAL_PEPTIDE_C_REGION (PHOBIUS); SIGNAL_PEPTIDE_H_REGION (PHOBIUS); SIGNAL_PEPTIDE_N_REGION (PHOBIUS); NON_CYTOPLASMIC_DOMAIN (PHOBIUS); SIGNAL_PEPTIDE (PHOBIUS); IPR012336 (PROSITE_PROFILES); SignalP-noTM (SIGNALP_EUK); IPR012336 (SUPERFAMILY)                                                                                                                                                                                                                                                                                                                                                                                                |
| 456 | c170924_g1_i1_len_1041_path_1_0_1040_2    | 10  | beta-secretase 1                                              | 347 | 5.16E-107 | 59.90% | 0.121   | IPR009119 (PRINTS); IPR021109 (G3DSA:2.40.70.GENE3D); IPR021109 (G3DSA:2.40.70.GENE3D); IPR001461 (PFAM); IPR001461 (PANTHER); PTHR13683:SF245 (PANTHER); IPR021109 (SUPERFAMILY)                                                                                                                                                                                                                                                                                                                                                                                                                                                                                                                                                                                                                        |



[illegible]

|     |                                                                 |     |                                                           |     |           |        |         |                                                                                                                                                                                                                                                                                                                                                                                                                                                                                                                                                                                                                                                                                                            |
|-----|-----------------------------------------------------------------|-----|-----------------------------------------------------------|-----|-----------|--------|---------|------------------------------------------------------------------------------------------------------------------------------------------------------------------------------------------------------------------------------------------------------------------------------------------------------------------------------------------------------------------------------------------------------------------------------------------------------------------------------------------------------------------------------------------------------------------------------------------------------------------------------------------------------------------------------------------------------------|
| 470 | c17270_g1_i1_len_1969_path_2037_0_1772_42_1773_1968_0           | 215 | coatomer subunit beta -like                               | 650 | 0         | 77.10% | 0.138   | IPR006692 (PFAM); PTHR19876 (PANTHER); PTHR19876:SF2 (PANTHER)                                                                                                                                                                                                                                                                                                                                                                                                                                                                                                                                                                                                                                             |
| 471 | c17281_g1_i1_len_1774_path_1752_0_1256_300_9_1257_1773_0        | 41  | wee1-like protein kinase                                  | 592 | 0         | 74.20% | 0.257   | IPR002290 (SMART); IPR017164 (PIRSF); G3DSA:1.10.510.10 (GENE3D); G3DSA:3.30.200.20 (GENE3D); IPR000719 (PFAM); PTHR11042:SF69 (PANTHER); PTHR11042 (PANTHER); IPR017441 (PROSITE_PATTERNS); IPR008271 (PROSITE_PATTERNS); IPR000719 (PROSITE_PROFILES); IPR011009 (SUPERFAMILY)                                                                                                                                                                                                                                                                                                                                                                                                                           |
| 472 | c172826_g1_i1_len_784_path_1_0_783_2                            | 14  | carbohydrate sulfotransferase 11-like                     | 261 | 2.48E-48  | 64.60% | 0.101   | IPR005331 (PFAM); IPR018011 (PANTHER); PTHR12137:SF29 (PANTHER); TMhelix (TMHMM); TMhelix (TMHMM)                                                                                                                                                                                                                                                                                                                                                                                                                                                                                                                                                                                                          |
| 473 | c17285_g2_i1_len_1039_path_1017_0_1038_1                        | 41  | mannosyl-oligosaccharide -alpha-mannosidase ia isoform x1 | 346 | 2.25E-49  | 87.00% | 0.112   | IPR001382 (G3DSA:1.50.10.GENE3D); IPR001382 (PFAM); PTHR11742:SF6 (PANTHER); IPR001382 (PANTHER); IPR001382 (SUPERFAMILY)                                                                                                                                                                                                                                                                                                                                                                                                                                                                                                                                                                                  |
| 474 | c17302_g1_i1_len_1330_path_62_0_750_813_75_1_756_819_757_1329_2 | 56  | tyrosine-protein phosphatase                              | 443 | 4.94E-33  | 84.60% | 0.111   | IPR000242 (PRINTS); IPR003595 (SMART); IPR000242 (SMART); IPR029021 (G3DSA:3.90.190.GENE3D); IPR000242 (PFAM); PTHR19134 (PANTHER); PTHR19134:SF274 (PANTHER); IPR016130 (PROSITE_PATTERNS); NON_CYTOPLASMIC_DOMAIN (PHOBIUS); NON_CYTOPLASMIC_DOMAIN (PHOBIUS); TRANSMEMBRANE (PHOBIUS); CYTOPLASMIC_DOMAIN (PHOBIUS); TRANSMEMBRANE (PHOBIUS); CYTOPLASMIC_DOMAIN (PHOBIUS); TRANSMEMBRANE (PHOBIUS); NON_CYTOPLASMIC_DOMAIN (PHOBIUS); TRANSMEMBRANE (PHOBIUS); CYTOPLASMIC_DOMAIN (PHOBIUS); TRANSMEMBRANE (PHOBIUS); TRANSMEMBRANE (PHOBIUS); IPR000242 (PROSITE_PROFILES); IPR000387 (PROSITE_PROFILES); IPR029021 (SUPERFAMILY); TMhelix (TMHMM); TMhelix (TMHMM); TMhelix (TMHMM); TMhelix (TMHMM) |
| 475 | c17323_g1_i1_len_1016_path_1_0_249_251_250_250_252_251_1015_2   | 268 | micos complex subunit mic27                               | 332 | 1.31E-26  | 54.80% | 0.185   | IPR019166 (PFAM); PTHR14564 (PANTHER); PTHR14564:SF1 (PANTHER); NON_CYTOPLASMIC_DOMAIN (PHOBIUS); CYTOPLASMIC_DOMAIN (PHOBIUS); TRANSMEMBRANE (PHOBIUS); NON_CYTOPLASMIC_DOMAIN (PHOBIUS); TRANSMEMBRANE (PHOBIUS); TMhelix (TMHMM)                                                                                                                                                                                                                                                                                                                                                                                                                                                                        |
| 476 | c173255_g1_i1_len_919_path_897_0_918_0                          | 21  | complement component q subcomponent-like protein          | 307 | 8.57E-37  | 60.90% | 0.523 Y | IPR001073 (PRINTS); IPR001073 (SMART); IPR001073 (PFAM); IPR008983 (G3DSA:2.60.120.GENE3D); PTHR22923 (PANTHER); PTHR22923:SF51 (PANTHER); SIGNAL_PEPTIDE_C_REGION (PHOBIUS); SIGNAL_PEPTIDE_N_REGION (PHOBIUS); SIGNAL_PEPTIDE (PHOBIUS); NON_CYTOPLASMIC_DOMAIN (PHOBIUS); SIGNAL_PEPTIDE_H_REGION (PHOBIUS); IPR001073 (PROSITE_PROFILES); SignalP-noTM (SIGNALP_EUK); IPR008983 (SUPERFAMILY); TMhelix (TMHMM)                                                                                                                                                                                                                                                                                         |
| 477 | c173325_g1_i1_len_906_path_884_0_905_1                          | 8   | protein fam172a-like isoform x2                           | 295 | 5.18E-59  | 71.50% | 0.106   | IPR019154 (PFAM); IPR029058 (G3DSA:3.40.50.GENE3D); PTHR21357 (PANTHER); IPR029058 (SUPERFAMILY)                                                                                                                                                                                                                                                                                                                                                                                                                                                                                                                                                                                                           |
| 478 | c1735_g1_i1_len_796_path_3841_0_19_3843_20_795_0                | 21  | otogelin- partial                                         | 266 | 8.76E-10  | 43.20% | 0.103   | no IPS match                                                                                                                                                                                                                                                                                                                                                                                                                                                                                                                                                                                                                                                                                               |
| 479 | c1735_g1_i2_len_1908_path_1937_0_1131_3843_1132_1907_2          | 56  | otogelin- partial                                         | 636 | 6.95E-15  | 42.20% | 0.1     | no IPS match                                                                                                                                                                                                                                                                                                                                                                                                                                                                                                                                                                                                                                                                                               |
| 480 | c173597_g1_i1_len_1458_path_1_0_1457_0                          | 21  | vitellogenin fused with superoxide dismutase              | 486 | 5.27E-45  | 47.40% | 0.109   | IPR001846 (SMART); IPR001846 (PFAM); PTHR23345 (PANTHER); PTHR23345:SF1 (PANTHER); IPR001846 (PROSITE_PROFILES)                                                                                                                                                                                                                                                                                                                                                                                                                                                                                                                                                                                            |
| 481 | c173967_g1_i1_len_688_path_1_0_687_0                            | 12  | prostaglandin-endoperoxide synthase 2                     | 230 | 2.57E-102 | 74.30% | 0.121   | IPR019791 (PRINTS); IPR019791 (G3DSA:1.10.640.GENE3D); IPR019791 (PFAM); PTHR11903:SF10 (PANTHER); PTHR11903 (PANTHER); IPR019791 (PROSITE_PROFILES); IPR010255 (SUPERFAMILY)                                                                                                                                                                                                                                                                                                                                                                                                                                                                                                                              |
| 482 | c173990_g1_i1_len_470_path_448_0_469_0                          | 6   | latrophilin cir1-like isoform x1                          | 157 | 5.64E-36  | 80.00% | 0.293   | IPR000832 (PFAM); PTHR12011 (PANTHER); PTHR12011:SF258 (PANTHER); TRANSMEMBRANE (PHOBIUS); TRANSMEMBRANE (PHOBIUS); CYTOPLASMIC_DOMAIN (PHOBIUS); NON_CYTOPLASMIC_DOMAIN (PHOBIUS); NON_CYTOPLASMIC_DOMAIN (PHOBIUS); CYTOPLASMIC_DOMAIN (PHOBIUS); TRANSMEMBRANE (PHOBIUS); TMhelix (TMHMM); TMhelix (TMHMM); TMhelix (TMHMM)                                                                                                                                                                                                                                                                                                                                                                             |
| 483 | c173990_g1_i1_len_470_path_448_0_469_2                          | 6   | latrophilin cir1-like                                     | 156 | 8.13E-32  | 93.30% | 0.274   | IPR000832 (PFAM); PTHR12011:SF258 (PANTHER); PTHR12011 (PANTHER); CYTOPLASMIC_DOMAIN (PHOBIUS); TRANSMEMBRANE (PHOBIUS); CYTOPLASMIC_DOMAIN (PHOBIUS); NON_CYTOPLASMIC_DOMAIN (PHOBIUS); TRANSMEMBRANE (PHOBIUS); TRANSMEMBRANE (PHOBIUS); NON_CYTOPLASMIC_DOMAIN (PHOBIUS); IPR017981 (PROSITE_PROFILES); TMhelix (TMHMM); TMhelix (TMHMM)                                                                                                                                                                                                                                                                                                                                                                |

|     |                                                                                         |      |                                    |     |           |        |       |                                                                                                                                                                                                                                                                                                                                                                                                                                                                                                                                                                                                                                                                                                                                                                                                                                                                                                                                                                                                                                                                                                                   |
|-----|-----------------------------------------------------------------------------------------|------|------------------------------------|-----|-----------|--------|-------|-------------------------------------------------------------------------------------------------------------------------------------------------------------------------------------------------------------------------------------------------------------------------------------------------------------------------------------------------------------------------------------------------------------------------------------------------------------------------------------------------------------------------------------------------------------------------------------------------------------------------------------------------------------------------------------------------------------------------------------------------------------------------------------------------------------------------------------------------------------------------------------------------------------------------------------------------------------------------------------------------------------------------------------------------------------------------------------------------------------------|
| 484 | c17402_g1_i1_len_2191_path_2268_0_301_25_3_02_2190_3                                    | 2822 | limulus clotting factor c          | 724 | 1.08E-88  | 43.00% | 0.221 | IPR002172 (PRINTS); IPR000742 (SMART); IPR000436 (SMART); IPR002172 (SMART); IPR001254 (SMART); IPR001881 (SMART); IPR002172 (G3DSA:4.10.400.GENE3D); G3DSA:2.40.10.10 (GENE3D); G3DSA:2.40.10.10 (GENE3D); G3DSA:2.10.25.10 (GENE3D); IPR000436 (PFAM); IPR002172 (G3DSA:4.10.400.GENE3D); IPR001254 (PFAM); G3DSA:2.10.70.10 (GENE3D); PF14670 (PFAM); G3DSA:2.40.10.10 (GENE3D); IPR002172 (G3DSA:4.10.400.GENE3D); IPR002172 (G3DSA:4.10.400.GENE3D); IPR002172 (PFAM); PTHR24265 (PANTHER); IPR013032 (PROSITE_PATTERNS); IPR018114 (PROSITE_PATTERNS); IPR018114 (PROSITE_PATTERNS); IPR000152 (PROSITE_PATTERNS); IPR018097 (PROSITE_PATTERNS); IPR023415 (PROSITE_PATTERNS); IPR000436 (PROSITE_PROFILES); IPR002172 (PROSITE_PROFILES); IPR000436 (PROSITE_PROFILES); IPR002172 (PROSITE_PROFILES); IPR002172 (PROSITE_PROFILES); IPR001254 (PROSITE_PROFILES); IPR002172 (PROSITE_PROFILES); IPR000742 (PROSITE_PROFILES); SSF57196 (SUPERFAMILY); IPR009003 (SUPERFAMILY); IPR000436 (SUPERFAMILY); IPR002172 (SUPERFAMILY); IPR002172 (SUPERFAMILY); IPR002172 (SUPERFAMILY); IPR002172 (SUPERFAMILY) |
| 485 | c174292_g1_i1_len_774_path_752_0_773_4                                                  | 6    | ankyrin repeat domain protein      | 253 | 1.97E-16  | 54.30% | 0.106 | IPR002110 (SMART); IPR020683 (G3DSA:1.25.40.GENE3D); IPR020683 (G3DSA:1.25.40.GENE3D); IPR020683 (PFAM); PTHR24198 (PANTHER); IPR002110 (PROSITE_PROFILES); IPR002110 (PROSITE_PROFILES); IPR002110 (PROSITE_PROFILES); IPR020683 (PROSITE_PROFILES); IPR020683 (SUPERFAMILY)                                                                                                                                                                                                                                                                                                                                                                                                                                                                                                                                                                                                                                                                                                                                                                                                                                     |
| 486 | c17450_g1_i2_len_2780_path_2758_0_2389_514_8_2390_2568_5327_2569_2569_5328_2570_277_9_0 | 156  | angiotensin-converting enzyme-like | 927 | 3.00E-162 | 61.70% | 0.271 | Coil (COILS); IPR001548 (PRINTS); IPR001548 (PFAM); IPR001548 (PANTHER); CYTOPLASMIC_DOMAIN (PHOBIUS); NON_CYTOPLASMIC_DOMAIN (PHOBIUS); TRANSMEMBRANE (PHOBIUS); SSF55486 (SUPERFAMILY); TMhelix (TMHMM)                                                                                                                                                                                                                                                                                                                                                                                                                                                                                                                                                                                                                                                                                                                                                                                                                                                                                                         |
| 487 | c174633_g1_i1_len_590_path_568_0_589_2                                                  | 3    | glucose-6-phosphate isomerase      | 196 | 5.67E-73  | 99.80% | 0.315 | IPR001672 (PFAM); G3DSA:3.40.50.10490 (GENE3D); IPR001672 (PANTHER); PTHR11469:SF7 (PANTHER); IPR001672 (PROSITE_PROFILES); SSF53697 (SUPERFAMILY)                                                                                                                                                                                                                                                                                                                                                                                                                                                                                                                                                                                                                                                                                                                                                                                                                                                                                                                                                                |
| 488 | c174771_g1_i1_len_666_path_1_0_665_5                                                    | 18   | ---NA---                           | 216 |           |        | 0.111 | G3DSA:2.40.10.10 (GENE3D); TRANSMEMBRANE (PHOBIUS); TRANSMEMBRANE (PHOBIUS); CYTOPLASMIC_DOMAIN (PHOBIUS); NON_CYTOPLASMIC_DOMAIN (PHOBIUS); CYTOPLASMIC_DOMAIN (PHOBIUS); IPR009003 (SUPERFAMILY); TMhelix (TMHMM)                                                                                                                                                                                                                                                                                                                                                                                                                                                                                                                                                                                                                                                                                                                                                                                                                                                                                               |
| 489 | c174797_g1_i1_len_296_path_274_0_295_0                                                  | 1    | ---NA---                           | 99  |           |        | 0.274 | IPR002172 (SMART); IPR002172 (PFAM); IPR002172 (G3DSA:4.10.400.GENE3D); IPR023415 (PROSITE_PATTERNS); IPR002172 (PROSITE_PROFILES); IPR002172 (SUPERFAMILY)                                                                                                                                                                                                                                                                                                                                                                                                                                                                                                                                                                                                                                                                                                                                                                                                                                                                                                                                                       |
| 490 | c17500_g1_i1_len_2037_path_3841_0_837_25_8_38_2036_2                                    | 123  | carboxypeptidase n subunit 2       | 679 | 6.91E-96  | 58.90% | 0.173 | SM00365 (SMART); IPR003591 (SMART); PF13516 (PFAM); G3DSA:3.80.10.10 (GENE3D); G3DSA:3.80.10.10 (GENE3D); IPR001611 (PFAM); IPR025875 (PFAM); PTHR24365 (PANTHER); NON_CYTOPLASMIC_DOMAIN (PHOBIUS); CYTOPLASMIC_DOMAIN (PHOBIUS); TRANSMEMBRANE (PHOBIUS); TRANSMEMBRANE (PHOBIUS); NON_CYTOPLASMIC_DOMAIN (PHOBIUS); CYTOPLASMIC_DOMAIN (PHOBIUS); TRANSMEMBRANE (PHOBIUS); IPR001611 (PROSITE_PROFILES); SSF52058 (SUPERFAMILY); TMhelix (TMHMM); TMhelix (TMHMM)                                                                                                                                                                                                                                                                                                                                                                                                                            |
| 491 | c17500_g1_i2_len_1356_path_3841_0_837_4678_838_1355_2                                   | 131  | carboxypeptidase n subunit 2       | 452 | 7.41E-29  | 55.10% | 0.173 | IPR003591 (SMART); IPR001611 (PFAM); IPR001611 (PFAM); G3DSA:3.80.10.10 (GENE3D); PTHR24373:SF98 (PANTHER); PTHR24373 (PANTHER); SSF52058 (SUPERFAMILY)                                                                                                                                                                                                                                                                                                                                                                                                                                                                                                                                                                                                                                                                                                                                                                                                                                                                                                                                                           |

|     |                                                                                        |        |                                                                     |      |           |        |       |                                                                                                                                                                                                                                                                                                                                                                                                                                                                                                                                                                                                                                                     |
|-----|----------------------------------------------------------------------------------------|--------|---------------------------------------------------------------------|------|-----------|--------|-------|-----------------------------------------------------------------------------------------------------------------------------------------------------------------------------------------------------------------------------------------------------------------------------------------------------------------------------------------------------------------------------------------------------------------------------------------------------------------------------------------------------------------------------------------------------------------------------------------------------------------------------------------------------|
| 492 | c175075_g1_i1_len_566_path_584_0_565_1                                                 | 6      | serrate partial                                                     | 189  | 8.54E-29  | 77.10% | 0.259 | IPR001881 (SMART); IPR000742 (SMART); G3DSA:2.10.25.10 (GENE3D); G3DSA:2.10.25.10 (GENE3D); IPR000742 (PFAM); PTHR24044 (PANTHER); PTHR24044:SF222 (PANTHER); IPR013032 (PROSITE_PATTERNS); IPR013032 (PROSITE_PATTERNS); IPR013032 (PROSITE_PATTERNS); IPR000152 (PROSITE_PATTERNS); IPR000152 (PROSITE_PATTERNS); IPR013032 (PROSITE_PATTERNS); IPR018097 (PROSITE_PATTERNS); NON_CYTOPLASMIC_DOMAIN (PHOBIUS); CYTOPLASMIC_DOMAIN (PHOBIUS); CYTOPLASMIC_DOMAIN (PHOBIUS); TRANSMEMBRANE (PHOBIUS); IPR000742 (PROSITE_PROFILES); IPR000742 (PROSITE_PROFILES); SSF57196 (SUPERFAMILY); SSF57196 (SUPERFAMILY); TMhelix (TMHMM); TMhelix (TMHMM) |
| 493 | c175082_g1_i1_len_183_path_1_0_182_2                                                   | 2      | microtubule-associated serine threonine-protein kinase 3 isoform x3 | 61   | 1.49E-32  | 98.00% | 0.116 | G3DSA:1.10.510.10 (GENE3D); IPR000719 (PFAM); PTHR24356 (PANTHER); PTHR24356:SF36 (PANTHER); TRANSMEMBRANE (PHOBIUS); CYTOPLASMIC_DOMAIN (PHOBIUS); NON_CYTOPLASMIC_DOMAIN (PHOBIUS); IPR000719 (PROSITE_PROFILES); IPR011009 (SUPERFAMILY); TMhelix (TMHMM)                                                                                                                                                                                                                                                                                                                                                                                        |
| 494 | c175506_g1_i1_len_651_path_629_0_650_1                                                 | 12     | peptidyl-prolyl cis-trans isomerase-like 4                          | 211  | 1.08E-76  | 84.10% | 0.141 | IPR002130 (PRINTS); IPR002130 (PFAM); IPR029000 (G3DSA:2.40.100.GENE3D); IPR024936 (PANTHER); PTHR11071:SF156 (PANTHER); IPR002130 (PROSITE_PROFILES); IPR029000 (SUPERFAMILY)                                                                                                                                                                                                                                                                                                                                                                                                                                                                      |
| 495 | c17559_g1_i1_len_1939_path_1979_0_1938_1                                               | 12556  | trypsin- partial                                                    | 639  | 5.18E-59  | 55.90% | 0.228 | IPR001314 (PRINTS); IPR001254 (SMART); G3DSA:2.40.10.10 (GENE3D); G3DSA:2.40.10.10 (GENE3D); G3DSA:2.40.10.10 (GENE3D); IPR001254 (PFAM); PTHR24276 (PANTHER); IPR018114 (PROSITE_PATTERNS); IPR018114 (PROSITE_PATTERNS); NON_CYTOPLASMIC_DOMAIN (PHOBIUS); TRANSMEMBRANE (PHOBIUS); CYTOPLASMIC_DOMAIN (PHOBIUS); IPR001254 (PROSITE_PROFILES); IPR009003 (SUPERFAMILY)                                                                                                                                                                                                                                                                           |
| 496 | c1756_g1_i1_len_3011_path_7743_0_99_934_10_0_3010_3                                    | 115454 | levansucrase                                                        | 1004 | 0         | 99.30% | 0.245 | IPR023296 (G3DSA:2.115.10.GENE3D); IPR003469 (PFAM); CYTOPLASMIC_DOMAIN (PHOBIUS); NON_CYTOPLASMIC_DOMAIN (PHOBIUS); TRANSMEMBRANE (PHOBIUS); TRANSMEMBRANE (PHOBIUS); IPR023296 (SUPERFAMILY)                                                                                                                                                                                                                                                                                                                                                                                                                                                      |
| 497 | c1756_g1_i2_len_3844_path_1_0_932_934_933_3843_0                                       | 171791 | hypothetical protein ECP02989421_5334                               | 1282 | 2.20E-81  | 90.60% | 0.149 | TRANSMEMBRANE (PHOBIUS); TRANSMEMBRANE (PHOBIUS); TRANSMEMBRANE (PHOBIUS); TRANSMEMBRANE (PHOBIUS); TRANSMEMBRANE (PHOBIUS); NON_CYTOPLASMIC_DOMAIN (PHOBIUS); CYTOPLASMIC_DOMAIN (PHOBIUS); CYTOPLASMIC_DOMAIN (PHOBIUS); CYTOPLASMIC_DOMAIN (PHOBIUS); CYTOPLASMIC_DOMAIN (PHOBIUS); TRANSMEMBRANE (PHOBIUS); NON_CYTOPLASMIC_DOMAIN (PHOBIUS); NON_CYTOPLASMIC_DOMAIN (PHOBIUS); TMhelix (TMHMM); TMhelix (TMHMM); TMhelix (TMHMM); TMhelix (TMHMM)                                                                                                                                                                                              |
| 498 | c1756_g1_i2_len_3844_path_1_0_932_934_933_3843_3                                       | 171791 | levansucrase                                                        | 1282 | 0         | 99.30% | 0.245 | IPR023296 (G3DSA:2.115.10.GENE3D); IPR003469 (PFAM); NON_CYTOPLASMIC_DOMAIN (PHOBIUS); TRANSMEMBRANE (PHOBIUS); CYTOPLASMIC_DOMAIN (PHOBIUS); NON_CYTOPLASMIC_DOMAIN (PHOBIUS); TRANSMEMBRANE (PHOBIUS); IPR023296 (SUPERFAMILY)                                                                                                                                                                                                                                                                                                                                                                                                                    |
| 499 | c1758_g1_i1_len_1492_path_1534_0_1491_0                                                | 10626  | peptidyl-prolyl cis-trans isomerase                                 | 491  | 5.25E-99  | 93.00% | 0.201 | IPR002130 (PRINTS); IPR029000 (G3DSA:2.40.100.GENE3D); IPR002130 (PFAM); PTHR11071:SF116 (PANTHER); IPR024936 (PANTHER); IPR020892 (PROSITE_PATTERNS); NON_CYTOPLASMIC_DOMAIN (PHOBIUS); CYTOPLASMIC_DOMAIN (PHOBIUS); TRANSMEMBRANE (PHOBIUS); NON_CYTOPLASMIC_DOMAIN (PHOBIUS); TRANSMEMBRANE (PHOBIUS); IPR002130 (PROSITE_PROFILES); IPR029000 (SUPERFAMILY); TMhelix (TMHMM); TMhelix (TMHMM); TMhelix (TMHMM)                                                                                                                                                                                                                                 |
| 500 | c17612_g1_i1_len_1225_path_1_0_464_466_465_605_607_606_827_829_828_994_996_995_122_4_0 | 67     | dehydrogenase reductase sdr family member 7                         | 404  | 7.23E-109 | 67.50% | 0.141 | IPR002347 (PRINTS); IPR002198 (PRINTS); IPR016040 (G3DSA:3.40.50.GENE3D); IPR002198 (PFAM); PTHR24322:SF31 (PANTHER); PTHR24322 (PANTHER); NON_CYTOPLASMIC_DOMAIN (PHOBIUS); TRANSMEMBRANE (PHOBIUS); TRANSMEMBRANE (PHOBIUS); CYTOPLASMIC_DOMAIN (PHOBIUS); CYTOPLASMIC_DOMAIN (PHOBIUS); SSF51735 (SUPERFAMILY); TMhelix (TMHMM); TMhelix (TMHMM)                                                                                                                                                                                                                                                                                                 |
| 501 | c17612_g1_i2_len_1084_path_1_0_464_607_465_686_829_687_853_996_854_1083_0              | 30     | dehydrogenase reductase sdr family member 7                         | 357  | 2.69E-77  | 55.70% | 0.141 | IPR002347 (PRINTS); IPR016040 (G3DSA:3.40.50.GENE3D); IPR016040 (G3DSA:3.40.50.GENE3D); IPR002198 (PFAM); PTHR24322:SF244 (PANTHER); PTHR24322 (PANTHER); TRANSMEMBRANE (PHOBIUS); CYTOPLASMIC_DOMAIN (PHOBIUS); CYTOPLASMIC_DOMAIN (PHOBIUS); NON_CYTOPLASMIC_DOMAIN (PHOBIUS); TRANSMEMBRANE (PHOBIUS); SSF51735 (SUPERFAMILY); TMhelix (TMHMM); TMhelix (TMHMM)                                                                                                                                                                                                                                                                                  |

|     |                                                                           |       |                                                  |     |           |        |         |                                                                                                                                                                                                                                                                                                                                                                                                                                                                                                                                                                                                                                                                                                                                                                                                                                |
|-----|---------------------------------------------------------------------------|-------|--------------------------------------------------|-----|-----------|--------|---------|--------------------------------------------------------------------------------------------------------------------------------------------------------------------------------------------------------------------------------------------------------------------------------------------------------------------------------------------------------------------------------------------------------------------------------------------------------------------------------------------------------------------------------------------------------------------------------------------------------------------------------------------------------------------------------------------------------------------------------------------------------------------------------------------------------------------------------|
| 502 | c17612_g1_i3_len_1058_path_1_0_464_466_465_605_607_606_827_996_828_1057_0 | 32    | dehydrogenase reductase sdr family member 7      | 348 | 1.55E-82  | 69.00% | 0.141   | IPR002198 (PRINTS); IPR002347 (PRINTS); IPR016040 (G3DSA:3.40.50.GENE3D); IPR002198 (PFAM); PTHR24322 (PANTHER); PTHR24322:SF244 (PANTHER); CYTOPLASMIC_DOMAIN (PHOBIUS); TRANSMEMBRANE (PHOBIUS); NON_CYTOPLASMIC_DOMAIN (PHOBIUS); SSF51735 (SUPERFAMILY); TMhelix (TMHMM)                                                                                                                                                                                                                                                                                                                                                                                                                                                                                                                                                   |
| 503 | c17621_g1_i1_len_1123_path_129_0_1122_3                                   | 23    | venom dipeptidyl peptidase 4 isoform x3          | 375 | 8.70E-26  | 70.80% | 0.102   | IPR001375 (PFAM); IPR029058 (G3DSA:3.40.50.GENE3D); PTHR11731 (PANTHER); PTHR11731:SF93 (PANTHER); TRANSMEMBRANE (PHOBIUS); CYTOPLASMIC_DOMAIN (PHOBIUS); NON_CYTOPLASMIC_DOMAIN (PHOBIUS); IPR029058 (SUPERFAMILY)                                                                                                                                                                                                                                                                                                                                                                                                                                                                                                                                                                                                            |
| 504 | c176318_g1_i1_len_899_path_813_0_724_1538_725_811_1538_812_898_4          | 16    | zinc finger protein                              | 300 | 3.19E-42  | 53.70% | 0.101   | IPR015880 (SMART); IPR013087 (G3DSA:3.30.160.GENE3D); PF13894 (PFAM); IPR007087 (PFAM); IPR013087 (G3DSA:3.30.160.GENE3D); IPR013087 (G3DSA:3.30.160.GENE3D); PF13465 (PFAM); PTHR24409 (PANTHER); PTHR24409:SF14 (PANTHER); IPR007087 (PROSITE_PATTERNS); IPR007087 (PROSITE_PATTERNS); IPR007087 (PROSITE_PATTERNS); IPR007087 (PROSITE_PATTERNS); IPR007087 (PROSITE_PATTERNS); IPR007087 (PROSITE_PROFILES); IPR007087 (PROSITE_PROFILES); IPR007087 (PROSITE_PROFILES); IPR007087 (PROSITE_PROFILES); IPR007087 (PROSITE_PROFILES); IPR007087 (PROSITE_PROFILES); SSF57667 (SUPERFAMILY); SSF57667 (SUPERFAMILY); SSF57667 (SUPERFAMILY)                                                                                                                                                                                  |
| 505 | c17634_g1_i1_len_1032_path_1_0_1031_5                                     | 25221 | venom allergen 3-like                            | 337 | 3.19E-45  | 50.10% | 0.750 Y | IPR001283 (PRINTS); IPR002413 (PRINTS); IPR014044 (SMART); IPR014044 (PFAM); IPR014044 (G3DSA:3.40.33.GENE3D); IPR001283 (PANTHER); NON_CYTOPLASMIC_DOMAIN (PHOBIUS); SIGNAL_PEPTIDE_C_REGION (PHOBIUS); SIGNAL_PEPTIDE_N_REGION (PHOBIUS); SIGNAL_PEPTIDE_H_REGION (PHOBIUS); SIGNAL_PEPTIDE (PHOBIUS); SignalP-noTM (SIGNALP_EUK); IPR014044 (SUPERFAMILY)                                                                                                                                                                                                                                                                                                                                                                                                                                                                   |
| 506 | c17648_g1_i1_len_2631_path_2609_0_1853_446_3_1854_1854_4464_1855_2630_2   | 651   | titin isoform x14                                | 864 | 2.53E-166 | 74.50% | 0.102   | IPR003599 (SMART); IPR003598 (SMART); IPR013098 (PFAM); IPR013783 (G3DSA:2.60.40.GENE3D); IPR013783 (G3DSA:2.60.40.GENE3D); IPR013783 (G3DSA:2.60.40.GENE3D); IPR013783 (G3DSA:2.60.40.GENE3D); PTHR19897:SF149 (PANTHER); PTHR19897 (PANTHER); TRANSMEMBRANE (PHOBIUS); CYTOPLASMIC_DOMAIN (PHOBIUS); NON_CYTOPLASMIC_DOMAIN (PHOBIUS); TRANSMEMBRANE (PHOBIUS); TRANSMEMBRANE (PHOBIUS); CYTOPLASMIC_DOMAIN (PHOBIUS); NON_CYTOPLASMIC_DOMAIN (PHOBIUS); TRANSMEMBRANE (PHOBIUS); NON_CYTOPLASMIC_DOMAIN (PHOBIUS); TRANSMEMBRANE (PHOBIUS); CYTOPLASMIC_DOMAIN (PHOBIUS); IPR007110 (PROSITE_PROFILES); IPR007110 (PROSITE_PROFILES); IPR007110 (PROSITE_PROFILES); IPR007110 (PROSITE_PROFILES); SSF48726 (SUPERFAMILY); SSF48726 (SUPERFAMILY); SSF48726 (SUPERFAMILY); TMhelix (TMHMM); TMhelix (TMHMM); TMhelix (TMHMM) |
| 507 | c17660_g1_i1_len_1709_path_1787_0_1211_299_6_1212_1214_26_1215_1708_2     | 782   | retinal dehydrogenase 1-like                     | 564 | 0         | 80.00% | 0.252   | IPR016163 (G3DSA:3.40.309.GENE3D); IPR015590 (PFAM); IPR016162 (G3DSA:3.40.605.GENE3D); PTHR11699 (PANTHER); PTHR11699:SF145 (PANTHER); IPR029510 (PROSITE_PATTERNS); IPR016160 (PROSITE_PATTERNS); IPR016161 (SUPERFAMILY)                                                                                                                                                                                                                                                                                                                                                                                                                                                                                                                                                                                                    |
| 508 | c176715_g1_i1_len_867_path_845_0_866_0                                    | 11    | carcinolectin 5b partial                         | 289 | 1.19E-43  | 66.60% | 0.101   | IPR002181 (SMART); IPR002181 (PFAM); IPR014715 (G3DSA:4.10.530.GENE3D); IPR014716 (G3DSA:3.90.215.GENE3D); PTHR19143 (PANTHER); IPR020837 (PROSITE_PATTERNS); CYTOPLASMIC_DOMAIN (PHOBIUS); TRANSMEMBRANE (PHOBIUS); NON_CYTOPLASMIC_DOMAIN (PHOBIUS); IPR002181 (PROSITE_PROFILES); IPR002181 (SUPERFAMILY); TMhelix (TMHMM)                                                                                                                                                                                                                                                                                                                                                                                                                                                                                                  |
| 509 | c176993_g1_i1_len_512_path_1_0_511_2                                      | 4     | zinc finger protein with krab and scan domains 4 | 170 | 1.57E-18  | 62.00% | 0.107   | IPR015880 (SMART); IPR013087 (G3DSA:3.30.160.GENE3D); IPR013087 (G3DSA:3.30.160.GENE3D); IPR007087 (PFAM); PTHR24409 (PANTHER); PTHR24409:SF14 (PANTHER); IPR007087 (PROSITE_PATTERNS); IPR007087 (PROSITE_PATTERNS); IPR007087 (PROSITE_PROFILES); IPR007087 (PROSITE_PROFILES); SSF57667 (SUPERFAMILY); SSF57667 (SUPERFAMILY)                                                                                                                                                                                                                                                                                                                                                                                                                                                                                               |



|     |                                                                                    |      |                                                               |     |           |         |         |                                                                                                                                                                                                                                                                                                                                                                                                                                                                                                                     |
|-----|------------------------------------------------------------------------------------|------|---------------------------------------------------------------|-----|-----------|---------|---------|---------------------------------------------------------------------------------------------------------------------------------------------------------------------------------------------------------------------------------------------------------------------------------------------------------------------------------------------------------------------------------------------------------------------------------------------------------------------------------------------------------------------|
| 510 | c17700_g1_i1_len_2316_path_2119_0_840_5735_841_2315_1                              | 313  | tolloid-like protein 2 isoform x1                             | 766 | 1.11E-144 | 70.20%  | 0.1     | IPR002172 (SMART); IPR000859 (SMART); IPR002172 (G3DSA:4.10.400.GENE3D); IPR000859 (G3DSA:2.60.120.GENE3D); IPR000859 (G3DSA:2.60.120.GENE3D); IPR000859 (PFAM); PTHR10127:SF557 (PANTHER); PTHR10127 (PANTHER); TRANSMEMBRANE (PHOBIUS); CYTOPLASMIC_DOMAIN (PHOBIUS); NON_CYTOPLASMIC_DOMAIN (PHOBIUS); TRANSMEMBRANE (PHOBIUS); NON_CYTOPLASMIC_DOMAIN (PHOBIUS); IPR000859 (PROSITE_PROFILES); IPR000859 (PROSITE_PROFILES); IPR000859 (SUPERFAMILY); IPR000859 (SUPERFAMILY); TMhelix (TMHMM); TMhelix (TMHMM) |
| 511 | c17700_g1_i2_len_2141_path_2119_0_840_2960_841_2140_1                              | 194  | tolloid-like protein 2 isoform x1                             | 708 | 8.27E-127 | 71.90%  | 0.1     | IPR002172 (SMART); IPR000859 (SMART); IPR000859 (G3DSA:2.60.120.GENE3D); IPR000859 (G3DSA:2.60.120.GENE3D); IPR002172 (G3DSA:4.10.400.GENE3D); IPR000859 (PFAM); PTHR10127 (PANTHER); PTHR10127:SF557 (PANTHER); IPR000859 (PROSITE_PROFILES); IPR000859 (PROSITE_PROFILES); IPR000859 (SUPERFAMILY); IPR000859 (SUPERFAMILY)                                                                                                                                                                                       |
| 512 | c177129_g1_i1_len_507_path_485_0_506_2                                             | 4    | insulin-degrading enzyme                                      | 169 | 6.33E-66  | 78.60%  | 0.114   | IPR011237 (G3DSA:3.30.830.GENE3D); PTHR11851 (PANTHER); PTHR11851:SF85 (PANTHER); IPR011249 (SUPERFAMILY)                                                                                                                                                                                                                                                                                                                                                                                                           |
| 513 | c177612_g1_i1_len_326_path_1_0_325_5                                               | 0    | proclotting enzyme                                            | 108 | 1.28E-08  | 47.00%  | 0.457 Y | IPR001254 (PFAM); G3DSA:2.40.10.10 (GENE3D); SIGNAL_PEPTIDE_N_REGION (PHOBIUS); SIGNAL_PEPTIDE_C_REGION (PHOBIUS); SIGNAL_PEPTIDE_H_REGION (PHOBIUS); SignalP-noTM (SIGNALP_EUK); IPR009003 (SUPERFAMILY)                                                                                                                                                                                                                                                                                                           |
| 514 | c17764_g1_i1_len_1612_path_1445_0_976_19_9_77_1103_2545_1104_1357_2545_1358_1611_0 | 38   | acidic phospholipase a2 pa4 isoform x2                        | 538 | 1.61E-42  | 57.30%  | 0.875 Y | IPR001211 (PFAM); IPR016090 (G3DSA:1.20.90.GENE3D); PTHR12253 (PANTHER); IPR013090 (PROSITE_PATTERNS); SIGNAL_PEPTIDE_C_REGION (PHOBIUS); NON_CYTOPLASMIC_DOMAIN (PHOBIUS); SIGNAL_PEPTIDE (PHOBIUS); SIGNAL_PEPTIDE_H_REGION (PHOBIUS); SIGNAL_PEPTIDE_N_REGION (PHOBIUS); SignalP-noTM (SIGNALP_GRAM_NEGATIVE); SignalP-TM (SIGNALP_GRAM_POSITIVE); SignalP-noTM (SIGNALP_EUK); IPR016090 (SUPERFAMILY); TMhelix (TMHMM)                                                                                          |
| 515 | c178015_g1_i1_len_351_path_329_0_350_1                                             | 2    | hypothetical protein DAPPUDRAFT_332703                        | 117 | 8.19E-40  | 60.50%  | 0.103   | IPR001846 (PFAM); IPR014853 (PFAM); PTHR23361:SF13 (PANTHER); PTHR23361 (PANTHER); IPR001846 (PROSITE_PROFILES)                                                                                                                                                                                                                                                                                                                                                                                                     |
| 516 | c17806_g1_i1_len_868_path_227_0_826_81_827_867_2                                   | 14   | bone morphogenetic protein 4-like                             | 289 | 4.81E-55  | 67.30%  | 0.151   | IPR001111 (PFAM); PTHR11848:SF131 (PANTHER); IPR015615 (PANTHER); NON_CYTOPLASMIC_DOMAIN (PHOBIUS); CYTOPLASMIC_DOMAIN (PHOBIUS); TRANSMEMBRANE (PHOBIUS); TMhelix (TMHMM)                                                                                                                                                                                                                                                                                                                                          |
| 517 | c17807_g1_i1_len_1434_path_1412_0_574_1987_575_1433_4                              | 1693 | mitochondrial matrix protein p33                              | 470 | 4.29E-85  | 67.40%  | 0.1     | IPR003428 (PFAM); IPR003428 (G3DSA:3.10.280.GENE3D); PTHR10826:SF1 (PANTHER); PTHR10826 (PANTHER); IPR003428 (SUPERFAMILY)                                                                                                                                                                                                                                                                                                                                                                                          |
| 518 | c17807_g1_i2_len_1452_path_1412_0_574_2894_575_592_1987_593_1451_4                 | 995  | mitochondrial matrix protein p33                              | 476 | 1.68E-82  | 66.70%  | 0.1     | IPR003428 (PFAM); IPR003428 (G3DSA:3.10.280.GENE3D); PTHR10826:SF1 (PANTHER); PTHR10826 (PANTHER); IPR003428 (SUPERFAMILY)                                                                                                                                                                                                                                                                                                                                                                                          |
| 519 | c178085_g1_i1_len_524_path_502_0_523_4                                             | 5    | tyrosine-protein kinase transmembrane receptor ror isoform x2 | 175 | 1.98E-18  | 100.00% | 0.126   | G3DSA:1.10.510.10 (GENE3D); IPR001245 (PFAM); PTHR24416 (PANTHER); PTHR24416:SF309 (PANTHER); TRANSMEMBRANE (PHOBIUS); TRANSMEMBRANE (PHOBIUS); NON_CYTOPLASMIC_DOMAIN (PHOBIUS); TRANSMEMBRANE (PHOBIUS); CYTOPLASMIC_DOMAIN (PHOBIUS); NON_CYTOPLASMIC_DOMAIN (PHOBIUS); TRANSMEMBRANE (PHOBIUS); CYTOPLASMIC_DOMAIN (PHOBIUS); CYTOPLASMIC_DOMAIN (PHOBIUS); NON_CYTOPLASMIC_DOMAIN (PHOBIUS); IPR011009 (SUPERFAMILY); TMhelix (TMHMM); TMhelix (TMHMM); TMhelix (TMHMM)                                        |
| 520 | c17836_g1_i1_len_1703_path_53_0_1702_2                                             | 71   | interleukin-1 receptor-associated kinase 4                    | 560 | 2.82E-119 | 59.90%  | 0.159   | IPR002290 (SMART); IPR000719 (PFAM); IPR011029 (G3DSA:1.10.533.GENE3D); G3DSA:3.30.200.20 (GENE3D); G3DSA:1.10.510.10 (GENE3D); IPR029397 (PFAM); PTHR24419:SF0 (PANTHER); PTHR24419 (PANTHER); IPR008271 (PROSITE_PATTERNS); IPR017441 (PROSITE_PATTERNS); CYTOPLASMIC_DOMAIN (PHOBIUS); TRANSMEMBRANE (PHOBIUS); NON_CYTOPLASMIC_DOMAIN (PHOBIUS); IPR000719 (PROSITE_PROFILES); IPR011029 (SUPERFAMILY); IPR011009 (SUPERFAMILY); TMhelix (TMHMM)                                                                |
| 521 | c17839_g1_i1_len_1821_path_1_0_1153_1155_1_154_1820_0                              | 38   | serpin 3                                                      | 601 | 1.36E-82  | 58.90%  | 0.167   | IPR023796 (SMART); IPR023796 (PFAM); G3DSA:2.30.39.10 (GENE3D); G3DSA:3.30.497.10 (GENE3D); PTHR11461:SF52 (PANTHER); IPR000215 (PANTHER); IPR023795 (PROSITE_PATTERNS); IPR023796 (SUPERFAMILY)                                                                                                                                                                                                                                                                                                                    |
| 522 | c17839_g1_i2_len_1367_path_1_0_1153_3620_1_154_1366_0                              | 31   | serpin 3                                                      | 456 | 1.96E-84  | 59.90%  | 0.167   | IPR023796 (SMART); IPR023796 (PFAM); G3DSA:2.30.39.10 (GENE3D); G3DSA:3.30.497.10 (GENE3D); IPR000215 (PANTHER); PTHR11461:SF52 (PANTHER); IPR023795 (PROSITE_PATTERNS); IPR023796 (SUPERFAMILY)                                                                                                                                                                                                                                                                                                                    |

|     |                                                                                                       |      |                                                                                                                             |     |           |        |         |                                                                                                                                                                                                                                                                                                                                                                                                                                                                                                                                                                                              |
|-----|-------------------------------------------------------------------------------------------------------|------|-----------------------------------------------------------------------------------------------------------------------------|-----|-----------|--------|---------|----------------------------------------------------------------------------------------------------------------------------------------------------------------------------------------------------------------------------------------------------------------------------------------------------------------------------------------------------------------------------------------------------------------------------------------------------------------------------------------------------------------------------------------------------------------------------------------------|
| 523 | c178411_g1_i1_len_503_path_481_0_502_5                                                                | 7    | succinate-semialdehyde mitochondrial                                                                                        | 167 | 7.65E-51  | 83.80% | 0.121   | IPR016163 (G3DSA:3.40.309.GENE3D); IPR015590 (PFAM); PTHR11699 (PANTHER); PTHR11699:SF49 (PANTHER); IPR016161 (SUPERFAMILY)                                                                                                                                                                                                                                                                                                                                                                                                                                                                  |
| 524 | c17890_g1_i1_len_2370_path_55_0_2369_0                                                                | 968  | tribbles homolog 2                                                                                                          | 784 | 1.36E-119 | 71.80% | 0.107   | IPR002290 (SMART); IPR000719 (PFAM); G3DSA:3.30.200.20 (GENE3D); G3DSA:1.10.510.10 (GENE3D); PTHR22961:SF4 (PANTHER); IPR024104 (PANTHER); TRANSMEMBRANE (PHOBIUS); TRANSMEMBRANE (PHOBIUS); TRANSMEMBRANE (PHOBIUS); CYTOPLASMIC_DOMAIN (PHOBIUS); NON_CYTOPLASMIC_DOMAIN (PHOBIUS); CYTOPLASMIC_DOMAIN (PHOBIUS); NON_CYTOPLASMIC_DOMAIN (PHOBIUS); IPR000719 (PROSITE_PROFILES); IPR011009 (SUPERFAMILY)                                                                                                                                                                                  |
| 525 | c17905_g1_i1_len_1133_path_969_0_403_1373_404_470_1960_471_502_1373_503_569_1960_570_601_1373_602_6_3 | 1117 | thioredoxin 1                                                                                                               | 372 | 1.76E-48  | 83.30% | 0.478 Y | PR00421 (PRINTS); IPR013766 (PFAM); IPR005746 (TIGRFAM); IPR012336 (G3DSA:3.40.30.GENE3D); IPR005746 (PANTHER); IPR017937 (PROSITE_PATTERNS); CYTOPLASMIC_DOMAIN (PHOBIUS); TRANSMEMBRANE (PHOBIUS); NON_CYTOPLASMIC_DOMAIN (PHOBIUS); CYTOPLASMIC_DOMAIN (PHOBIUS); TRANSMEMBRANE (PHOBIUS); NON_CYTOPLASMIC_DOMAIN (PHOBIUS); TRANSMEMBRANE (PHOBIUS); IPR012336 (PROSITE_PROFILES); SignalP-noTM (SIGNALP_EUK); IPR012336 (SUPERFAMILY); TMhelix (TMHMM); TMhelix (TMHMM)                                                                                                                 |
| 526 | c17909_g1_i1_len_1408_path_1386_0_1407_5                                                              | 89   | moxd1 homolog 2- partial                                                                                                    | 469 | 1.51E-27  | 59.40% | 0.881 Y | IPR005018 (SMART); IPR005018 (PFAM); PTHR10157:SF23 (PANTHER); IPR000945 (PANTHER); SIGNAL_PEPTIDE_C_REGION (PHOBIUS); CYTOPLASMIC_DOMAIN (PHOBIUS); CYTOPLASMIC_DOMAIN (PHOBIUS); SIGNAL_PEPTIDE (PHOBIUS); SIGNAL_PEPTIDE_H_REGION (PHOBIUS); NON_CYTOPLASMIC_DOMAIN (PHOBIUS); NON_CYTOPLASMIC_DOMAIN (PHOBIUS); TRANSMEMBRANE (PHOBIUS); SIGNAL_PEPTIDE_N_REGION (PHOBIUS); TRANSMEMBRANE (PHOBIUS); TRANSMEMBRANE (PHOBIUS); IPR005018 (PROSITE_PROFILES); SignalP-TM (SIGNALP_GRAM_POSITIVE); SignalP-noTM (SIGNALP_GRAM_NEGATIVE); SignalP-noTM (SIGNALP_EUK); SSF49344 (SUPERFAMILY) |
| 527 | c179482_g1_i1_len_262_path_303_0_261_4                                                                | 0    | chitinase 10 precursor                                                                                                      | 87  | 6.78E-23  | 70.60% | 0.101   | IPR013781 (G3DSA:3.20.20.GENE3D); IPR001223 (PFAM); PTHR11177 (PANTHER); PTHR11177:SF112 (PANTHER); IPR017853 (SUPERFAMILY)                                                                                                                                                                                                                                                                                                                                                                                                                                                                  |
| 528 | c17962_g1_i2_len_370_path_1_0_182_184_183_369_5                                                       | 19   | allergen 5                                                                                                                  | 117 | 2.92E-07  | 69.80% | 0.263   | IPR002413 (PRINTS); IPR014044 (G3DSA:3.40.33.GENE3D); TMhelix (TMHMM)                                                                                                                                                                                                                                                                                                                                                                                                                                                                                                                        |
| 529 | c17962_g1_i3_len_984_path_1329_0_109_1439_110_796_184_797_983_5                                       | 565  | val5_vesmc ame: full=venom allergen 5 ame: full=antigen 5 ame: full=cysteine-rich venom protein short=crvp flags: precursor | 322 | 5.28E-06  | 70.00% | 0.264   | IPR002413 (PRINTS); IPR014044 (G3DSA:3.40.33.GENE3D)                                                                                                                                                                                                                                                                                                                                                                                                                                                                                                                                         |
| 530 | c179635_g1_i1_len_388_path_366_0_387_1                                                                | 3    | zinc finger protein 735                                                                                                     | 129 | 1.13E-42  | 73.70% | 0.098   | IPR015880 (SMART); IPR013087 (G3DSA:3.30.160.GENE3D); IPR013087 (G3DSA:3.30.160.GENE3D); PF13465 (PFAM); IPR013087 (G3DSA:3.30.160.GENE3D); IPR007087 (PFAM); PTHR24409 (PANTHER); IPR007087 (PROSITE_PATTERNS); IPR007087 (PROSITE_PATTERNS); IPR007087 (PROSITE_PATTERNS); IPR007087 (PROSITE_PATTERNS); IPR007087 (PROSITE_PROFILES); IPR007087 (PROSITE_PROFILES); IPR007087 (PROSITE_PROFILES); IPR007087 (PROSITE_PROFILES); SSF57667 (SUPERFAMILY); SSF57667 (SUPERFAMILY); SSF57667 (SUPERFAMILY)                                                                                    |
| 531 | c179951_g1_i1_len_346_path_1_0_345_3                                                                  | 2    | low-density lipoprotein receptor-related protein 1b-like                                                                    | 116 | 5.79E-14  | 63.00% | 0.432 Y | IPR002172 (PRINTS); IPR002172 (SMART); IPR002172 (G3DSA:4.10.400.GENE3D); IPR002172 (PFAM); IPR002172 (G3DSA:4.10.400.GENE3D); PTHR10529 (PANTHER); IPR023415 (PROSITE_PATTERNS); IPR023415 (PROSITE_PATTERNS); IPR002172 (PROSITE_PROFILES); IPR002172 (PROSITE_PROFILES); IPR002172 (SUPERFAMILY); IPR002172 (SUPERFAMILY)                                                                                                                                                                                                                                                                 |
| 532 | c179963_g1_i1_len_451_path_429_0_450_4                                                                | 10   | transcription factor e4f1-like                                                                                              | 150 | 6.50E-35  | 65.30% | 0.099   | IPR015880 (SMART); IPR013087 (G3DSA:3.30.160.GENE3D); PF13465 (PFAM); IPR013087 (G3DSA:3.30.160.GENE3D); PF13912 (PFAM); PTHR24409 (PANTHER); IPR007087 (PROSITE_PATTERNS); IPR007087 (PROSITE_PATTERNS); IPR007087 (PROSITE_PROFILES); IPR007087 (PROSITE_PROFILES); IPR007087 (PROSITE_PROFILES); SSF57667 (SUPERFAMILY); SSF57667 (SUPERFAMILY)                                                                                                                                                                                                                                           |
| 533 | c18025_g1_i1_len_1161_path_1191_0_108_1300_109_110_1302_111_1160_1                                    | 3072 | eukaryotic translation initiation factor 3 subunit i-like                                                                   | 380 | 3.10E-180 | 84.20% | 0.157   | IPR001680 (SMART); IPR001680 (PFAM); IPR015943 (G3DSA:2.130.10.GENE3D); PTHR19877 (PANTHER); IPR019775 (PROSITE_PATTERNS); IPR027525 (HAMAP); IPR017986 (PROSITE_PROFILES); IPR017986 (PROSITE_PROFILES); IPR001680 (PROSITE_PROFILES); IPR001680 (PROSITE_PROFILES); IPR001680 (PROSITE_PROFILES); IPR001680 (PROSITE_PROFILES); IPR017986 (SUPERFAMILY)                                                                                                                                                                                                                                    |

|     |                                                                              |        |                                                |     |           |        |       |                                                                                                                                                                                                                                                                                                                                                                                                                                                                                                                                                                                                                                                                                                                                                                                                                                                                    |
|-----|------------------------------------------------------------------------------|--------|------------------------------------------------|-----|-----------|--------|-------|--------------------------------------------------------------------------------------------------------------------------------------------------------------------------------------------------------------------------------------------------------------------------------------------------------------------------------------------------------------------------------------------------------------------------------------------------------------------------------------------------------------------------------------------------------------------------------------------------------------------------------------------------------------------------------------------------------------------------------------------------------------------------------------------------------------------------------------------------------------------|
| 534 | c18091_g1_i1_len_2158_path_53_0_329_383_33_0_350_404_351_2157_0              | 80     | zinc finger protein 135-like isoform x2        | 720 | 1.21E-71  | 56.50% | 0.172 | IPR015880 (SMART); IPR013087 (G3DSA:3.30.160.GENE3D); PF13465 (PFAM); IPR013087 (G3DSA:3.30.160.GENE3D); PF13912 (PFAM); PTHR24409 (PANTHER); IPR007087 (PROSITE_PATTERNS); CYTOPLASMIC_DOMAIN (PHOBIUS); TRANSMEMBRANE (PHOBIUS); TRANSMEMBRANE (PHOBIUS); NON_CYTOPLASMIC_DOMAIN (PHOBIUS); NON_CYTOPLASMIC_DOMAIN (PHOBIUS); IPR007087 (PROSITE_PROFILES); SSF57667 (SUPERFAMILY); SSF57667 (SUPERFAMILY); SSF57667 (SUPERFAMILY); SSF57667 (SUPERFAMILY) |
| 535 | c18100_g1_i1_len_2101_path_2186_0_2100_1                                     | 1183   | arylsulfatase b                                | 700 | 8.04E-173 | 64.80% | 0.216 | G3DSA:3.30.1120.10 (GENE3D); IPR017849 (G3DSA:3.40.720.GENE3D); IPR000917 (PFAM); PTHR10342-SF206 (PANTHER); PTHR10342 (PANTHER); IPR024607 (PROSITE_PATTERNS); IPR024607 (PROSITE_PATTERNS); TRANSMEMBRANE (PHOBIUS); TRANSMEMBRANE (PHOBIUS); NON_CYTOPLASMIC_DOMAIN (PHOBIUS); CYTOPLASMIC_DOMAIN (PHOBIUS); CYTOPLASMIC_DOMAIN (PHOBIUS); IPR017850 (SUPERFAMILY); TMhelix (TMHMM)                                                                                                                                                                                                                                                                                                                                                                                                                                                                             |
| 536 | c182504_g1_i1_len_493_path_471_0_492_0                                       | 2      | leucine-rich repeat-containing protein partial | 165 | 1.82E-52  | 78.70% | 0.279 | IPR003591 (SMART); G3DSA:3.80.10.10 (GENE3D); IPR001611 (PFAM); PTHR23155-SF466 (PANTHER); PTHR23155 (PANTHER); IPR001611 (PROSITE_PROFILES); IPR001611 (PROSITE_PROFILES); IPR001611 (PROSITE_PROFILES); SSF52058 (SUPERFAMILY)                                                                                                                                                                                                                                                                                                                                                                                                                                                                                                                                                                                                                                   |
| 537 | c18269_g1_i1_len_1960_path_2096_0_1959_0                                     | 1099   | clotting factor b-like                         | 646 | 1.25E-65  | 60.30% | 0.217 | IPR001314 (PRINTS); IPR001254 (SMART); G3DSA:2.40.10.10 (GENE3D); G3DSA:2.40.10.10 (GENE3D); IPR001254 (PFAM); G3DSA:2.40.10.10 (GENE3D); PTHR24256 (PANTHER); IPR018114 (PROSITE_PATTERNS); IPR018114 (PROSITE_PATTERNS); TRANSMEMBRANE (PHOBIUS); TRANSMEMBRANE (PHOBIUS); TRANSMEMBRANE (PHOBIUS); CYTOPLASMIC_DOMAIN (PHOBIUS); CYTOPLASMIC_DOMAIN (PHOBIUS); NON_CYTOPLASMIC_DOMAIN (PHOBIUS); IPR001254 (PROSITE_PROFILES); IPR009003 (SUPERFAMILY)                                                                                                                                                                                                                                                                                                                                                                                                          |
| 538 | c18271_g1_i1_len_1777_path_1855_0_1776_2                                     | 116    | wd40 repeat-containing protein smu1            | 586 | 0         | 93.80% | 0.108 | IPR020472 (PRINTS); IPR006594 (SMART); IPR006595 (SMART); IPR001680 (SMART); IPR001680 (PFAM); IPR015943 (G3DSA:2.130.10.GENE3D); PTHR22848 (PANTHER); IPR019775 (PROSITE_PATTERNS); IPR019775 (PROSITE_PATTERNS); IPR001680 (PROSITE_PROFILES); IPR017986 (PROSITE_PROFILES); IPR001680 (PROSITE_PROFILES); IPR001680 (PROSITE_PROFILES); IPR006595 (PROSITE_PROFILES); IPR001680 (PROSITE_PROFILES); IPR001680 (PROSITE_PROFILES); IPR006594 (PROSITE_PROFILES); IPR017986 (SUPERFAMILY)                                                                                                                                                                                                                                                                                                                                                                         |
| 539 | c18283_g1_i1_len_1179_path_1338_0_58_1397_59_120_1458_121_162_159_163_1178_1 | 286704 | prostasin- partial                             | 379 | 2.02E-46  | 55.30% | 0.173 | IPR001314 (PRINTS); IPR001254 (SMART); G3DSA:2.40.10.10 (GENE3D); IPR001254 (PFAM); G3DSA:2.40.10.10 (GENE3D); G3DSA:2.40.10.10 (GENE3D); PTHR24268 (PANTHER); IPR018114 (PROSITE_PATTERNS); IPR018114 (PROSITE_PATTERNS); NON_CYTOPLASMIC_DOMAIN (PHOBIUS); TRANSMEMBRANE (PHOBIUS); CYTOPLASMIC_DOMAIN (PHOBIUS); IPR001254 (PROSITE_PROFILES); IPR009003 (SUPERFAMILY); TMhelix (TMHMM)                                                                                                                                                                                                                                                                                                                                                                                                                                                                         |
| 540 | c182841_g1_i1_len_156_path_1_0_155_2                                         | 0      | early growth response partial                  | 47  | 9.31E-15  | 77.00% | 0.11  | IPR013087 (G3DSA:3.30.160.GENE3D); PF13465 (PFAM); IPR013087 (G3DSA:3.30.160.GENE3D); PTHR24409 (PANTHER); IPR007087 (PROSITE_PROFILES); IPR007087 (PROSITE_PROFILES); SSF57667 (SUPERFAMILY)                                                                                                                                                                                                                                                                                                                                                                                                                                                                                                                                                                                                                                                                      |
| 541 | c183142_g1_i1_len_321_path_299_0_320_1                                       | 1      | phenoloxidase subunit a3                       | 107 | 8.90E-25  | 60.70% | 0.116 | IPR008922 (G3DSA:1.10.1280.GENE3D); IPR000896 (PFAM); PTHR11511-SF4 (PANTHER); IPR013788 (PANTHER); IPR008922 (SUPERFAMILY)                                                                                                                                                                                                                                                                                                                                                                                                                                                                                                                                                                                                                                                                                                                                        |

|     |                                                                                                        |     |                                                                 |     |          |         |         |                                                                                                                                                                                                                                                                                                                                                                                                                                                                                                                                                                                                                                                                                                                         |
|-----|--------------------------------------------------------------------------------------------------------|-----|-----------------------------------------------------------------|-----|----------|---------|---------|-------------------------------------------------------------------------------------------------------------------------------------------------------------------------------------------------------------------------------------------------------------------------------------------------------------------------------------------------------------------------------------------------------------------------------------------------------------------------------------------------------------------------------------------------------------------------------------------------------------------------------------------------------------------------------------------------------------------------|
| 542 | c18323_g1_i1_len_1878_path_1_0_239_4232_24_0_1877_2                                                    | 55  | ankyrin isoform p                                               | 626 | 0        | 93.20%  | 0.129   | IPR002110 (PRINTS); IPR002110 (SMART); IPR020683 (G3DSA:1.25.40.GENE3D); IPR020683 (G3DSA:1.25.40.GENE3D); IPR020683 (G3DSA:1.25.40.GENE3D); IPR020683 (PFAM); IPR002110 (PFAM); IPR020683 (G3DSA:1.25.40.GENE3D); PTHR24123 (PANTHER); PTHR24123:SF0 (PANTHER); IPR002110 (PROSITE_PROFILES); IPR020683 (PROSITE_PROFILES); IPR002110 (PROSITE_PROFILES); IPR002110 (PROSITE_PROFILES); IPR002110 (PROSITE_PROFILES); IPR020683 (SUPERFAMILY); IPR020683 (SUPERFAMILY) |
| 543 | c18336_g1_i2_len_2346_path_2324_0_2061_438_6_2062_2345_0                                               | 108 | glutamate-rich wd repeat-containing protein 1                   | 782 | 0        | 72.30%  | 0.106   | IPR020472 (PRINTS); IPR001680 (SMART); IPR022052 (PFAM); IPR001680 (PFAM); IPR015943 (G3DSA:2.130.10.GENE3D); PTHR22850:SF6 (PANTHER); PTHR22850 (PANTHER); IPR019775 (PROSITE_PATTERNS); CYTOPLASMIC_DOMAIN (PHOBIUS); TRANSMEMBRANE (PHOBIUS); TRANSMEMBRANE (PHOBIUS); NON_CYTOPLASMIC_DOMAIN (PHOBIUS); NON_CYTOPLASMIC_DOMAIN (PHOBIUS); IPR001680 (PROSITE_PROFILES); IPR017986 (PROSITE_PROFILES); IPR001680 (PROSITE_PROFILES); IPR001680 (PROSITE_PROFILES); IPR017986 (SUPERFAMILY)                                                                                                                                                                                                                           |
| 544 | c18361_g1_i1_len_1058_path_1134_0_924_2056_925_927_25_928_1057_4                                       | 30  | bola-like protein 3                                             | 353 | 3.20E-31 | 78.90%  | 0.216   | IPR002634 (PFAM); G3DSA:3.30.70.1500 (GENE3D); PTHR12735 (PANTHER); PTHR12735:SF4 (PANTHER); TRANSMEMBRANE (PHOBIUS); NON_CYTOPLASMIC_DOMAIN (PHOBIUS); CYTOPLASMIC_DOMAIN (PHOBIUS); IPR002634 (SUPERFAMILY); TMhelix (TMHMM); TMhelix (TMHMM)                                                                                                                                                                                                                                                                                                                                                                                                                                                                         |
| 545 | c184011_g1_i1_len_397_path_375_0_396_4                                                                 | 2   | 2-hydroxy-3-oxopropionate reductase                             | 132 | 4.26E-81 | 100.00% | 0.131   | IPR006115 (PFAM); IPR016040 (G3DSA:3.40.50.GENE3D); IPR029154 (PFAM); IPR013328 (G3DSA:1.10.1040.GENE3D); PTHR22981 (PANTHER); PTHR22981:SF42 (PANTHER); SSF51735 (SUPERFAMILY); IPR008927 (SUPERFAMILY)                                                                                                                                                                                                                                                                                                                                                                                                                                                                                                                |
| 546 | c18408_g1_i1_len_817_path_2823_0_41_2029_4_2_243_2231_244_816_0                                        | 43  | dehydrogenase reductase sdr family member on chromosome partial | 273 | 3.88E-26 | 61.80%  | 0.113   | IPR016040 (G3DSA:3.40.50.GENE3D); PTHR24320 (PANTHER); PTHR24320:SF55 (PANTHER); NON_CYTOPLASMIC_DOMAIN (PHOBIUS); TRANSMEMBRANE (PHOBIUS); CYTOPLASMIC_DOMAIN (PHOBIUS); SSF51735 (SUPERFAMILY); TMhelix (TMHMM)                                                                                                                                                                                                                                                                                                                                                                                                                                                                                                       |
| 547 | c18408_g1_i2_len_1413_path_1391_0_637_2029_638_839_2231_840_1412_2                                     | 81  | retinol dehydrogenase 12                                        | 471 | 3.49E-95 | 61.60%  | 0.237   | IPR002347 (PRINTS); IPR016040 (G3DSA:3.40.50.GENE3D); IPR002198 (PFAM); PTHR24320 (PANTHER); PTHR24320:SF55 (PANTHER); NON_CYTOPLASMIC_DOMAIN (PHOBIUS); TRANSMEMBRANE (PHOBIUS); TRANSMEMBRANE (PHOBIUS); CYTOPLASMIC_DOMAIN (PHOBIUS); NON_CYTOPLASMIC_DOMAIN (PHOBIUS); CYTOPLASMIC_DOMAIN (PHOBIUS); TRANSMEMBRANE (PHOBIUS); SSF51735 (SUPERFAMILY); TMhelix (TMHMM); TMhelix (TMHMM); TMhelix (TMHMM)                                                                                                                                                                                                                                                                                                             |
| 548 | c18408_g1_i3_len_1211_path_1391_0_637_2231_638_1210_2                                                  | 42  | retinol dehydrogenase 12                                        | 403 | 8.12E-53 | 65.00%  | 0.237   | IPR002347 (PRINTS); IPR016040 (G3DSA:3.40.50.GENE3D); IPR002198 (PFAM); PTHR24320 (PANTHER); PTHR24320:SF55 (PANTHER); TRANSMEMBRANE (PHOBIUS); CYTOPLASMIC_DOMAIN (PHOBIUS); NON_CYTOPLASMIC_DOMAIN (PHOBIUS); SSF51735 (SUPERFAMILY); TMhelix (TMHMM)                                                                                                                                                                                                                                                                                                                                                                                                                                                                 |
| 549 | c184101_g1_i1_len_192_path_1_0_71_73_72_10_1_73_102_131_73_132_161_73_162_191_3                        | 0   | allatostatin precursor protein                                  | 64  | 6.39E-24 | 71.30%  | 0.108   | IPR010276 (PFAM)                                                                                                                                                                                                                                                                                                                                                                                                                                                                                                                                                                                                                                                                                                        |
| 550 | c184189_g1_i1_len_537_path_515_0_536_0                                                                 | 5   | zinc finger protein 112-like                                    | 179 | 3.17E-33 | 64.50%  | 0.216   | IPR015880 (SMART); IPR013087 (G3DSA:3.30.160.GENE3D); IPR013087 (G3DSA:3.30.160.GENE3D); PF13465 (PFAM); PTHR24409 (PANTHER); IPR007087 (PROSITE_PATTERNS); IPR007087 (PROSITE_PATTERNS); IPR007087 (PROSITE_PATTERNS); IPR007087 (PROSITE_PATTERNS); NON_CYTOPLASMIC_DOMAIN (PHOBIUS); TRANSMEMBRANE (PHOBIUS); CYTOPLASMIC_DOMAIN (PHOBIUS); IPR007087 (PROSITE_PROFILES); IPR007087 (PROSITE_PROFILES); IPR007087 (PROSITE_PROFILES); IPR007087 (PROSITE_PROFILES); SSF57667 (SUPERFAMILY); TMhelix (TMHMM)                                                                                                                                                                                                          |
| 551 | c18420_g1_i1_len_1984_path_53_0_134_188_13_5_135_189_136_979_1031_980_1844_1940_184_5_1845_1941_1846_0 | 218 | 27 kda hemolymph                                                | 662 | 3.53E-29 | 49.50%  | 0.384 Y | IPR009832 (PFAM); PTHR20997 (PANTHER); CYTOPLASMIC_DOMAIN (PHOBIUS); NON_CYTOPLASMIC_DOMAIN (PHOBIUS); TRANSMEMBRANE (PHOBIUS)                                                                                                                                                                                                                                                                                                                                                                                                                                                                                                                                                                                          |

|     |                                                                    |     |                                                       |     |          |         |         |                                                                                                                                                                                                                                                                                                                                                                                                                                                                                                                                             |
|-----|--------------------------------------------------------------------|-----|-------------------------------------------------------|-----|----------|---------|---------|---------------------------------------------------------------------------------------------------------------------------------------------------------------------------------------------------------------------------------------------------------------------------------------------------------------------------------------------------------------------------------------------------------------------------------------------------------------------------------------------------------------------------------------------|
| 552 | c18420_g1_i2_len_888_path_1055_0_22_1031_23_887_0                  | 76  | 27 kda hemolymph                                      | 296 | 1.07E-26 | 48.60%  | 0.203   | IPR009832 (PFAM); PTHR20997 (PANTHER)                                                                                                                                                                                                                                                                                                                                                                                                                                                                                                       |
| 553 | c184991_g1_i1_len_163_path_1_0_162_5                               | 2   | membrane alanyl aminopeptidase                        | 54  | 2.73E-29 | 100.00% | 0.168   | IPR014782 (PRINTS); G3DSA:1.10.390.10 (GENE3D); IPR014782 (PFAM); PTHR11533:SF163 (PANTHER); IPR001930 (PANTHER); SSF55486 (SUPERFAMILY)                                                                                                                                                                                                                                                                                                                                                                                                    |
| 554 | c185590_g1_i1_len_232_path_1_0_231_2                               | 2   | acyl- -binding domain-containing protein 4 isoform x1 | 77  | 1.04E-16 | 62.80%  | 0.688 Y | PF13900 (PFAM); PTHR16213 (PANTHER); NON_CYTOPLASMIC_DOMAIN (PHOBIUS); CYTOPLASMIC_DOMAIN (PHOBIUS); TRANSMEMBRANE (PHOBIUS); SignalP-noTM (SIGNALP_EUK)                                                                                                                                                                                                                                                                                                                                                                                    |
| 555 | c18593_g1_i1_len_880_path_858_0_879_3                              | 406 | secreted metalloprotease mcp02                        | 287 | 1.39E-09 | 48.20%  | 0.165   | IPR025711 (PFAM); NON_CYTOPLASMIC_DOMAIN (PHOBIUS); CYTOPLASMIC_DOMAIN (PHOBIUS); TRANSMEMBRANE (PHOBIUS); TMhelix (TMHMM)                                                                                                                                                                                                                                                                                                                                                                                                                  |
| 556 | c186765_g1_i1_len_239_path_227_0_238_1                             | 2   | dynein heavy chain axonemal isoform 2                 | 80  | 7.29E-28 | 76.60%  | 0.208   | PTHR22878 (PANTHER)                                                                                                                                                                                                                                                                                                                                                                                                                                                                                                                         |
| 557 | c186765_g1_i1_len_239_path_227_0_238_4                             | 2   | tak1-binding protein isoform cra_b                    | 80  | 1.61E-21 | 70.90%  | 0.121   | PF13900 (PFAM); PTHR16213 (PANTHER)                                                                                                                                                                                                                                                                                                                                                                                                                                                                                                         |
| 558 | c186765_g1_i1_len_239_path_227_0_238_5                             | 2   | unnamed portein product                               | 79  | 1.61E-29 | 76.40%  | 0.185   | PR02045 (PRINTS); PTHR12138 (PANTHER)                                                                                                                                                                                                                                                                                                                                                                                                                                                                                                       |
| 559 | c18719_g2_i1_len_949_path_2475_0_460_2935_461_948_1                | 64  | wd repeat domain 5                                    | 316 | 7.47E-53 | 86.40%  | 0.103   | IPR001680 (SMART); IPR015943 (G3DSA:2.130.10.GENE3D); IPR001680 (PFAM); PTHR22847:SF308 (PANTHER); PTHR22847 (PANTHER); IPR019775 (PROSITE_PATTERNS); IPR001680 (PROSITE_PROFILES); IPR017986 (PROSITE_PROFILES); IPR001680 (PROSITE_PROFILES); IPR017986 (SUPERFAMILY)                                                                                                                                                                                                                                                                     |
| 560 | c18719_g2_i2_len_1207_path_2475_0_460_25_461_1009_574_1010_1206_1  | 30  | protein will die slowly-like                          | 402 | 0        | 93.80%  | 0.103   | IPR020472 (PRINTS); IPR001680 (SMART); IPR001680 (PFAM); IPR015943 (G3DSA:2.130.10.GENE3D); PTHR22847:SF308 (PANTHER); PTHR22847 (PANTHER); IPR019775 (PROSITE_PATTERNS); IPR019775 (PROSITE_PATTERNS); IPR019775 (PROSITE_PATTERNS); IPR019775 (PROSITE_PATTERNS); IPR001680 (PROSITE_PROFILES); IPR001680 (PROSITE_PROFILES); IPR001680 (PROSITE_PROFILES); IPR001680 (PROSITE_PROFILES); IPR001680 (PROSITE_PROFILES); IPR017986 (PROSITE_PROFILES); IPR001680 (PROSITE_PROFILES); IPR017986 (SUPERFAMILY)                               |
| 561 | c18719_g2_i3_len_1353_path_2475_0_460_25_461_1009_2155_1010_1352_1 | 27  | protein will die slowly-like                          | 451 | 0        | 93.20%  | 0.103   | IPR020472 (PRINTS); IPR001680 (SMART); IPR001680 (PFAM); IPR015943 (G3DSA:2.130.10.GENE3D); PTHR22847:SF308 (PANTHER); PTHR22847 (PANTHER); IPR019775 (PROSITE_PATTERNS); IPR019775 (PROSITE_PATTERNS); IPR019775 (PROSITE_PATTERNS); IPR019775 (PROSITE_PATTERNS); IPR001680 (PROSITE_PROFILES); IPR001680 (PROSITE_PROFILES); IPR001680 (PROSITE_PROFILES); IPR001680 (PROSITE_PROFILES); IPR001680 (PROSITE_PROFILES); IPR001680 (PROSITE_PROFILES); IPR017986 (PROSITE_PROFILES); IPR001680 (PROSITE_PROFILES); IPR017986 (SUPERFAMILY) |
| 562 | c187364_g1_i1_len_314_path_1_0_313_5                               | 1   | suppressor of tumorigenicity 14 protein               | 104 | 4.14E-08 | 63.50%  | 0.149   | IPR001254 (PFAM); G3DSA:2.40.10.10 (GENE3D); PTHR24275:SF50 (PANTHER); PTHR24275 (PANTHER); IPR009003 (SUPERFAMILY)                                                                                                                                                                                                                                                                                                                                                                                                                         |
| 563 | c18816_g1_i1_len_2422_path_1_0_227_229_228_228_230_229_2421_5      | 62  | von willebrand factor like 1                          | 800 | 3.35E-24 | 40.20%  | 0.099   | IPR014853 (SMART); IPR001007 (PROSITE_PATTERNS); PD968187 (PRODOM); IPR001007 (PROSITE_PROFILES); IPR002919 (SUPERFAMILY)                                                                                                                                                                                                                                                                                                                                                                                                                   |
| 564 | c1883_g1_i1_len_1069_path_1049_0_474_1526_475_1068_5               | 39  | ferritin 2                                            | 356 | 6.56E-68 | 80.70%  | 0.13    | IPR008331 (PFAM); IPR012347 (G3DSA:1.20.1260.GENE3D); IPR001519 (PANTHER); IPR009040 (PROSITE_PROFILES); IPR009078 (SUPERFAMILY)                                                                                                                                                                                                                                                                                                                                                                                                            |
| 565 | c1886_g1_i1_len_333_path_1_0_332_5                                 | 3   | agap004066-pa-like protein                            | 111 | 8.95E-16 | 84.30%  | 0.212   | IPR000742 (PFAM); G3DSA:2.10.25.10 (GENE3D); NON_CYTOPLASMIC_DOMAIN (PHOBIUS); TRANSMEMBRANE (PHOBIUS); CYTOPLASMIC_DOMAIN (PHOBIUS); IPR000742 (PROSITE_PROFILES); SSF57196 (SUPERFAMILY); TMhelix (TMHMM)                                                                                                                                                                                                                                                                                                                                 |
| 566 | c18900_g1_i1_len_565_path_1_0_564_1                                | 28  | zinc-responsiveness transcriptional activator         | 183 | 1.40E-13 | 64.10%  | 0.139   | IPR015880 (SMART); IPR013087 (G3DSA:3.30.160.GENE3D); IPR007087 (PFAM); IPR013087 (G3DSA:3.30.160.GENE3D); PTHR24409 (PANTHER); IPR007087 (PROSITE_PATTERNS); IPR007087 (PROSITE_PATTERNS); IPR007087 (PROSITE_PROFILES); IPR007087 (PROSITE_PROFILES); SSF57667 (SUPERFAMILY)                                                                                                                                                                                                                                                              |
| 567 | c18900_g2_i1_len_1261_path_1133_0_1260_2                           | 111 | zinc finger protein 658b-like                         | 420 | 1.16E-42 | 63.00%  | 0.211   | IPR015880 (SMART); IPR013087 (G3DSA:3.30.160.GENE3D); IPR013087 (G3DSA:3.30.160.GENE3D); PF13465 (PFAM); IPR013087 (G3DSA:3.30.160.GENE3D); PTHR24409 (PANTHER); IPR007087 (PROSITE_PATTERNS); IPR007087 (PROSITE_PATTERNS); IPR007087 (PROSITE_PATTERNS); IPR007087 (PROSITE_PATTERNS); IPR007087 (PROSITE_PATTERNS); IPR007087 (PROSITE_PATTERNS); IPR007087 (PROSITE_PROFILES); IPR007087 (PROSITE_PROFILES); IPR007087 (PROSITE_PROFILES); IPR007087 (PROSITE_PROFILES); SSF57667 (SUPERFAMILY); SSF57667 (SUPERFAMILY)                 |



|     |                                                                                                         |      |                                                           |     |           |        |         |                                                                                                                                                                                                                                                                                                                                                                                                                                                                                                                                                                                                                                                                                                                                                                                                                                                                                                                                                                                     |
|-----|---------------------------------------------------------------------------------------------------------|------|-----------------------------------------------------------|-----|-----------|--------|---------|-------------------------------------------------------------------------------------------------------------------------------------------------------------------------------------------------------------------------------------------------------------------------------------------------------------------------------------------------------------------------------------------------------------------------------------------------------------------------------------------------------------------------------------------------------------------------------------------------------------------------------------------------------------------------------------------------------------------------------------------------------------------------------------------------------------------------------------------------------------------------------------------------------------------------------------------------------------------------------------|
| 568 | c18954_g1_i1_len_1677_path_1755_0_497_2253_498_521_3454_522_522_3455_523_529_2284_530_555_102_556_1_1   | 74   | exocyst complex component 6b-like isoform 1               | 544 | 5.06E-159 | 80.50% | 0.306   | Coil (COILS); Coil (COILS); IPR007225 (PFAM); IPR007225 (PANTHER); NON_CYTOPLASMIC_DOMAIN (PHOBIUS); NON_CYTOPLASMIC_DOMAIN (PHOBIUS); CYTOPLASMIC_DOMAIN (PHOBIUS); TRANSMEMBRANE (PHOBIUS); TRANSMEMBRANE (PHOBIUS); TMhelix (TMHMM); TMhelix (TMHMM)                                                                                                                                                                                                                                                                                                                                                                                                                                                                                                                                                                                                                                                                                                                             |
| 569 | c1898_g1_i1_len_1608_path_1_0_1201_1203_12_02_1409_1411_1410_1442_1411_1443_1475_14_11_1476_1508_1411_3 | 61   | gastrula zinc finger                                      | 536 | 2.12E-72  | 55.30% | 0.108   | IPR015880 (SMART); IPR013087 (G3DSA:3.30.160.GENE3D); IPR007087 (PFAM); PF13894 (PFAM); IPR013087 (G3DSA:3.30.160.GENE3D); IPR013087 (G3DSA:3.30.160.GENE3D); IPR013087 (G3DSA:3.30.160.GENE3D); PF13465 (PFAM); IPR013087 (G3DSA:3.30.160.GENE3D); PTHR24409 (PANTHER); IPR007087 (PROSITE_PATTERNS); IPR007087 (PROSITE_PROFILES); SSF57667 (SUPERFAMILY); SSF57667 (SUPERFAMILY); SSF57667 (SUPERFAMILY); SSF57667 (SUPERFAMILY); SSF57667 (SUPERFAMILY); SSF57667 (SUPERFAMILY) |
| 570 | c1898_g1_i1_len_1608_path_1_0_1201_1203_12_02_1409_1411_1410_1442_1411_1443_1475_14_11_1476_1508_1411_4 | 61   | choline-binding surface protein a                         | 536 | 8.86E-07  | 62.50% | 0.105   | Coil (COILS); CYTOPLASMIC_DOMAIN (PHOBIUS); TRANSMEMBRANE (PHOBIUS); TRANSMEMBRANE (PHOBIUS); CYTOPLASMIC_DOMAIN (PHOBIUS); TRANSMEMBRANE (PHOBIUS); TRANSMEMBRANE (PHOBIUS); NON_CYTOPLASMIC_DOMAIN (PHOBIUS); NON_CYTOPLASMIC_DOMAIN (PHOBIUS); CYTOPLASMIC_DOMAIN (PHOBIUS); TMhelix (TMHMM)                                                                                                                                                                                                                                                                                                                                                                                                                                                                                                                                                                                                                                                                                     |
| 571 | c1902_g1_i1_len_1648_path_53_0_1647_3                                                                   | 3374 | universal minicircle sequence binding protein             | 542 | 3.76E-29  | 53.60% | 0.189   | Coil (COILS); Coil (COILS); IPR001878 (SMART); IPR001878 (G3DSA:4.10.60.GENE3D); IPR001878 (PFAM); IPR001878 (G3DSA:4.10.60.GENE3D); PTHR23002 (PANTHER); IPR001878 (PROSITE_PROFILES); IPR001878 (PROSITE_PROFILES); IPR001878 (PROSITE_PROFILES); IPR001878 (PROSITE_PROFILES); IPR001878 (PROSITE_PROFILES); IPR001878 (PROSITE_PROFILES); IPR001878 (SUPERFAMILY); IPR001878 (SUPERFAMILY); IPR001878 (SUPERFAMILY)                                                                                                                                                                                                                                                                                                                                                                                                                                                                                                                                                             |
| 572 | c19020_g3_i1_len_365_path_1219_0_364_4                                                                  | 1    | n-acetylated-alpha-linked acidic dipeptidase-like protein | 122 | 4.05E-39  | 75.40% | 0.116   | G3DSA:3.40.630.10 (GENE3D); IPR007484 (PFAM); PTHR10404 (PANTHER); SSF53187 (SUPERFAMILY)                                                                                                                                                                                                                                                                                                                                                                                                                                                                                                                                                                                                                                                                                                                                                                                                                                                                                           |
| 573 | c19172_g1_i1_len_2425_path_1_0_2424_0                                                                   | 91   | phospholipase a2                                          | 809 | 1.44E-26  | 48.90% | 0.161   | IPR016090 (SMART); IPR016090 (PFAM); IPR016090 (G3DSA:1.20.90.GENE3D); PTHR11716:SF45 (PANTHER); IPR001211 (PANTHER); NON_CYTOPLASMIC_DOMAIN (PHOBIUS); CYTOPLASMIC_DOMAIN (PHOBIUS); NON_CYTOPLASMIC_DOMAIN (PHOBIUS); CYTOPLASMIC_DOMAIN (PHOBIUS); CYTOPLASMIC_DOMAIN (PHOBIUS); NON_CYTOPLASMIC_DOMAIN (PHOBIUS); TRANSMEMBRANE (PHOBIUS); NON_CYTOPLASMIC_DOMAIN (PHOBIUS); TRANSMEMBRANE (PHOBIUS); TRANSMEMBRANE (PHOBIUS); TRANSMEMBRANE (PHOBIUS); TRANSMEMBRANE (PHOBIUS); IPRO016090 (SUPERFAMILY); TMhelix (TMHMM); TMhelix (TMHMM); TMhelix (TMHMM); TMhelix (TMHMM); TMhelix (TMHMM); TMhelix (TMHMM)                                                                                                                                                                                                                                                                                                                                                                 |
| 574 | c19208_g1_i1_len_1620_path_1_0_1433_1435_1_434_1434_1436_1435_1458_3416_1459_1587_1_460_1588_1748_5     | 1155 | endoplasmic reticulum resident protein 29                 | 535 | 2.98E-93  | 71.10% | 0.466 Y | Coil (COILS); IPR011679 (PFAM); IPR011679 (G3DSA:1.20.1150.GENE3D); IPR012336 (G3DSA:3.40.30.GENE3D); IPR012883 (PFAM); PTHR12211 (PANTHER); PTHR12211:SF0 (PANTHER); CYTOPLASMIC_DOMAIN (PHOBIUS); NON_CYTOPLASMIC_DOMAIN (PHOBIUS); TRANSMEMBRANE (PHOBIUS); CYTOPLASMIC_DOMAIN (PHOBIUS); TRANSMEMBRANE (PHOBIUS); IPR011679 (SUPERFAMILY); IPR012336 (SUPERFAMILY); TMhelix (TMHMM); TMhelix (TMHMM); TMhelix (TMHMM)                                                                                                                                                                                                                                                                                                                                                                                                                                                                                                                                                           |
| 575 | c19208_g1_i2_len_1749_path_1_0_1433_1435_1_434_1434_1436_1435_1458_3416_1459_1587_1_460_1588_1748_5     | 1035 | endoplasmic reticulum resident protein 29                 | 578 | 1.59E-84  | 63.80% | 0.493 Y | Coil (COILS); IPR011679 (PFAM); IPR011679 (G3DSA:1.20.1150.GENE3D); IPR012336 (G3DSA:3.40.30.GENE3D); IPR012883 (PFAM); PTHR12211:SF0 (PANTHER); PTHR12211 (PANTHER); TRANSMEMBRANE (PHOBIUS); TRANSMEMBRANE (PHOBIUS); CYTOPLASMIC_DOMAIN (PHOBIUS); NON_CYTOPLASMIC_DOMAIN (PHOBIUS); CYTOPLASMIC_DOMAIN (PHOBIUS); IPR012336 (SUPERFAMILY); IPR011679 (SUPERFAMILY); TMhelix (TMHMM); TMhelix (TMHMM); TMhelix (TMHMM)                                                                                                                                                                                                                                                                                                                                                                                                                                                                                                                                                           |



|     |                                                                           |     |                                                                |     |          |        |         |                                                                                                                                                                                                                                                                                                                                                                                                                                                                                                                  |
|-----|---------------------------------------------------------------------------|-----|----------------------------------------------------------------|-----|----------|--------|---------|------------------------------------------------------------------------------------------------------------------------------------------------------------------------------------------------------------------------------------------------------------------------------------------------------------------------------------------------------------------------------------------------------------------------------------------------------------------------------------------------------------------|
| 585 | c19850_g1_i1_len_460_path_1_0_18_20_19_373_375_374_389_391_390_459_0      | 708 | ribosomal protein s26                                          | 154 | 3.38E-59 | 89.80% | 0.103   | IPR000892 (PFAM); IPR000892 (PANTHER); IPR000892 (PROSITE PATTERNS)                                                                                                                                                                                                                                                                                                                                                                                                                                              |
| 586 | c19850_g1_i2_len_459_path_947_0_17_20_18_3_72_375_373_388_391_389_458_2   | 553 | ribosomal protein s26                                          | 153 | 1.77E-59 | 89.20% | 0.114   | IPR000892 (PFAM); IPR000892 (PANTHER); IPR000892 (PROSITE PATTERNS)                                                                                                                                                                                                                                                                                                                                                                                                                                              |
| 587 | c19937_g2_i1_len_336_path_454_0_268_15_269_335_2                          | 1   | serine protease 33                                             | 112 | 7.82E-06 | 50.00% | 0.501 Y | G3DSA:2.40.10.10 (GENE3D); SIGNAL_PEPTIDE_C_REGION (PHOBIUS); SIGNAL_PEPTIDE_N_REGION (PHOBIUS); SIGNAL_PEPTIDE_H_REGION (PHOBIUS); NON_CYTOPLASMIC_DOMAIN (PHOBIUS); SIGNAL_PEPTIDE (PHOBIUS); SignalP-noTM (SIGNALP_EUK)                                                                                                                                                                                                                                                                                       |
| 588 | c19967_g1_i1_len_1172_path_1223_0_54_1277_55_55_25_56_568_2450_569_1171_1 | 112 | mitochondrial                                                  | 391 | 1.35E-40 | 76.60% | 0.112   | IPR012336 (G3DSA:3.40.30.GENE3D); IPR013766 (PFAM); PTHR10438:SF254 (PANTHER); IPR005746 (PANTHER); TRANSMEMBRANE (PHOBIUS); NON_CYTOPLASMIC_DOMAIN (PHOBIUS); CYTOPLASMIC_DOMAIN (PHOBIUS); CYTOPLASMIC_DOMAIN (PHOBIUS); NON_CYTOPLASMIC_DOMAIN (PHOBIUS); TRANSMEMBRANE (PHOBIUS); CYTOPLASMIC_DOMAIN (PHOBIUS); TRANSMEMBRANE (PHOBIUS); NON_CYTOPLASMIC_DOMAIN (PHOBIUS); TRANSMEMBRANE (PHOBIUS); IPR012336 (PROSITE_PROFILES); IPR012336 (SUPERFAMILY); TMhelix (TMHMM); TMhelix (TMHMM); TMhelix (TMHMM) |
| 589 | c19967_g1_i2_len_618_path_2448_0_14_2450_1_5_617_2                        | 5   | mitochondrial                                                  | 206 | 4.29E-43 | 76.60% | 0.465 Y | IPR013766 (PFAM); IPR012336 (G3DSA:3.40.30.GENE3D); PTHR10438:SF254 (PANTHER); IPR005746 (PANTHER); NON_CYTOPLASMIC_DOMAIN (PHOBIUS); SIGNAL_PEPTIDE_N_REGION (PHOBIUS); SIGNAL_PEPTIDE_C_REGION (PHOBIUS); SIGNAL_PEPTIDE (PHOBIUS); SIGNAL_PEPTIDE_H_REGION (PHOBIUS); IPR012336 (PROSITE_PROFILES); SignalP-noTM (SIGNALP_EUK); IPR012336 (SUPERFAMILY)                                                                                                                                                       |
| 590 | c20019_g1_i1_len_1520_path_1_0_1519_5                                     | 46  | zinc finger protein 658-like isoform x1                        | 506 | 1.42E-34 | 56.90% | 0.1     | IPR015880 (SMART); PF13465 (PFAM); IPR013087 (G3DSA:3.30.160.GENE3D); IPR013087 (G3DSA:3.30.160.GENE3D); PTHR24409:SF14 (PANTHER); PTHR24409 (PANTHER); IPR007087 (PROSITE PATTERNS); IPR007087 (PROSITE PATTERNS); IPR007087 (PROSITE PATTERNS); IPR007087 (PROSITE PATTERNS); IPR007087 (PROSITE_PROFILES); IPR007087 (PROSITE_PROFILES); IPR007087 (PROSITE_PROFILES); IPR007087 (PROSITE_PROFILES); IPR007087 (PROSITE_PROFILES); SSF57667 (SUPERFAMILY); SSF57667 (SUPERFAMILY); SSF57667 (SUPERFAMILY)     |
| 591 | c20132_g1_i2_len_2392_path_227_0_2234_226_2235_2391_2                     | 105 | cadherin-related tumor suppressor                              | 797 | 7.94E-14 | 44.90% | 0.262   | IPR002126 (PRINTS); IPR002126 (SMART); IPR002126 (G3DSA:2.60.40.GENE3D); IPR002126 (PFAM); IPR002126 (G3DSA:2.60.40.GENE3D); PTHR24027 (PANTHER); CYTOPLASMIC_DOMAIN (PHOBIUS); TRANSMEMBRANE (PHOBIUS); CYTOPLASMIC_DOMAIN (PHOBIUS); TRANSMEMBRANE (PHOBIUS); NON_CYTOPLASMIC_DOMAIN (PHOBIUS); TRANSMEMBRANE (PHOBIUS); IPR002126 (PROSITE_PROFILES); IPR015919 (SUPERFAMILY); IPR015919 (SUPERFAMILY); TMhelix (TMHMM); TMhelix (TMHMM); TMhelix (TMHMM)                                                     |
| 592 | c20204_g1_i1_len_958_path_105_0_957_3                                     | 52  | adiponectin receptor protein                                   | 314 | 3.97E-21 | 77.70% | 0.101   | IPR004254 (PFAM); PTHR20855:SF15 (PANTHER); IPR004254 (PANTHER); TRANSMEMBRANE (PHOBIUS); CYTOPLASMIC_DOMAIN (PHOBIUS); TRANSMEMBRANE (PHOBIUS); CYTOPLASMIC_DOMAIN (PHOBIUS); TRANSMEMBRANE (PHOBIUS); TRANSMEMBRANE (PHOBIUS); NON_CYTOPLASMIC_DOMAIN (PHOBIUS); NON_CYTOPLASMIC_DOMAIN (PHOBIUS); CYTOPLASMIC_DOMAIN (PHOBIUS); TMhelix (TMHMM); TMhelix (TMHMM); TMhelix (TMHMM)                                                                                                                             |
| 593 | c2037_g1_i1_len_1527_path_1505_0_1526_1                                   | 111 | perq amino acid-rich with gyf domain-containing protein 2-like | 509 | 2.60E-36 | 63.40% | 0.11    | IPR000884 (SMART); IPR002223 (PFAM); IPR000884 (PFAM); IPR002223 (G3DSA:4.10.410.GENE3D); G3DSA:2.20.100.10 (GENE3D); PTHR11311 (PANTHER); IPR020901 (PROSITE PATTERNS); CYTOPLASMIC_DOMAIN (PHOBIUS); NON_CYTOPLASMIC_DOMAIN (PHOBIUS); TRANSMEMBRANE (PHOBIUS); IPR000884 (PROSITE_PROFILES); IPR000884 (PROSITE_PROFILES); IPR002223 (PROSITE_PROFILES); IPR000884 (SUPERFAMILY); IPR002223 (SUPERFAMILY); IPR000884 (SUPERFAMILY); TMhelix (TMHMM)                                                           |

|     |                                                                         |      |                                             |     |           |        |       |                                                                                                                                                                                                                                                                                                                                                                                                                                                                                                                                                                                                                                                                                                                                    |
|-----|-------------------------------------------------------------------------|------|---------------------------------------------|-----|-----------|--------|-------|------------------------------------------------------------------------------------------------------------------------------------------------------------------------------------------------------------------------------------------------------------------------------------------------------------------------------------------------------------------------------------------------------------------------------------------------------------------------------------------------------------------------------------------------------------------------------------------------------------------------------------------------------------------------------------------------------------------------------------|
| 594 | c20382_g1_i1_len_1560_path_1671_0_37_3412_38_41_1846_42_1559_0          | 173  | gastrula zinc finger                        | 514 | 4.87E-42  | 55.60% | 0.121 | IPR015880 (SMART); IPR007087 (PFAM); IPR013087 (G3DSA:3.30.160.GENE3D); IPR013087 (G3DSA:3.30.160.GENE3D); PF13465 (PFAM); PTHR24409 (PANTHER); PTHR24409:SF13 (PANTHER); IPR007087 (PROSITE_PATTERNS); IPR007087 (PROSITE_PATTERNS); IPR007087 (PROSITE_PATTERNS); IPR007087 (PROSITE_PATTERNS); IPR007087 (PROSITE_PATTERNS); IPR007087 (PROSITE_PATTERNS); IPR007087 (PROSITE_PROFILES); IPR007087 (PROSITE_PROFILES); IPR007087 (PROSITE_PROFILES); IPR007087 (PROSITE_PROFILES); IPR007087 (PROSITE_PROFILES); IPR007087 (PROSITE_PROFILES); SSF57667 (SUPERFAMILY); SSF57667 (SUPERFAMILY); SSF57667 (SUPERFAMILY);                                                                                                          |
| 595 | c20382_g1_i2_len_1693_path_1671_0_37_1709_38_174_1846_175_1692_1        | 187  | gastrula zinc finger                        | 558 | 3.79E-41  | 56.70% | 0.208 | IPR015880 (SMART); IPR013087 (G3DSA:3.30.160.GENE3D); PF13465 (PFAM); IPR013087 (G3DSA:3.30.160.GENE3D); IPR007087 (PFAM); PTHR24409:SF13 (PANTHER); PTHR24409 (PANTHER); IPR007087 (PROSITE_PATTERNS); IPR007087 (PROSITE_PATTERNS); IPR007087 (PROSITE_PATTERNS); IPR007087 (PROSITE_PATTERNS); IPR007087 (PROSITE_PATTERNS); IPR007087 (PROSITE_PATTERNS); NON_CYTOPLASMIC_DOMAIN (PHOBIUS); TRANSMEMBRANE (PHOBIUS); CYTOPLASMIC_DOMAIN (PHOBIUS); IPR007087 (PROSITE_PROFILES); IPR007087 (PROSITE_PROFILES); IPR007087 (PROSITE_PROFILES); IPR007087 (PROSITE_PROFILES); IPR007087 (PROSITE_PROFILES); IPR007087 (PROSITE_PROFILES); SSF57667 (SUPERFAMILY); SSF57667 (SUPERFAMILY); SSF57667 (SUPERFAMILY); TMhelix (TMHMM) |
| 596 | c20445_g1_i1_len_1631_path_3808_0_72_311_73_687_1872_688_1630_0         | 48   | twitchin isoform x2                         | 544 | 0         | 76.40% | 0.109 | Coil (COILS); IPR003598 (SMART); IPR003599 (SMART); IPR013783 (G3DSA:2.60.40.GENE3D); IPR013783 (G3DSA:2.60.40.GENE3D); IPR013098 (PFAM); PTHR19897:SF148 (PANTHER); PTHR19897 (PANTHER); IPR007110 (PROSITE_PROFILES); IPR007110 (PROSITE_PROFILES); SSF48726 (SUPERFAMILY); SSF48726 (SUPERFAMILY); SSF48726 (SUPERFAMILY);                                                                                                                                                                                                                                                                                                                                                                                                      |
| 597 | c20484_g1_i1_len_656_path_734_0_655_2                                   | 2519 | transmembrane protease serine 9-like        | 213 | 8.17E-23  | 56.70% | 0.104 | IPR001254 (SMART); IPR001254 (PFAM); G3DSA:2.40.10.10 (GENE3D); PTHR24260 (PANTHER); IPR018114 (PROSITE_PATTERNS); IPR001254 (PROSITE_PROFILES); IPR009003 (SUPERFAMILY)                                                                                                                                                                                                                                                                                                                                                                                                                                                                                                                                                           |
| 598 | c20538_g1_i1_len_1430_path_103_0_495_598_4_96_496_102_497_1429_4        | 76   | ras-related protein rab-39b                 | 477 | 6.42E-124 | 88.00% | 0.131 | IPR001806 (PRINTS); IPR024156 (SMART); IPR003579 (SMART); IPR003578 (SMART); IPR020849 (SMART); IPR002041 (SMART); IPR005225 (TIGRFAM); IPR027417 (G3DSA:3.40.50.GENE3D); IPR001806 (PFAM); PTHR24073 (PANTHER); PTHR24073:SF376 (PANTHER); TRANSMEMBRANE (PHOBIUS); CYTOPLASMIC_DOMAIN (PHOBIUS); NON_CYTOPLASMIC_DOMAIN (PHOBIUS); CYTOPLASMIC_DOMAIN (PHOBIUS); TRANSMEMBRANE (PHOBIUS); PS51419 (PROSITE_PROFILES); IPR027417 (SUPERFAMILY); TMhelix (TMHMM); TMhelix (TMHMM)                                                                                                                                                                                                                                                  |
| 599 | c20542_g2_i1_len_1700_path_3681_0_1101_178_4_1102_1125_1808_1126_1699_0 | 37   | membrane metallo-endopeptidase-like 1-like  | 567 | 2.22E-179 | 82.00% | 0.125 | IPR018497 (PRINTS); IPR008753 (PFAM); IPR024079 (G3DSA:3.40.390.GENE3D); IPR018497 (PFAM); IPR000718 (PANTHER); PTHR11733:SF113 (PANTHER); TRANSMEMBRANE (PHOBIUS); NON_CYTOPLASMIC_DOMAIN (PHOBIUS); CYTOPLASMIC_DOMAIN (PHOBIUS); TRANSMEMBRANE (PHOBIUS); NON_CYTOPLASMIC_DOMAIN (PHOBIUS); SSF55486 (SUPERFAMILY); TMhelix (TMHMM); TMhelix (TMHMM)                                                                                                                                                                                                                                                                                                                                                                            |
| 600 | c20561_g3_i1_len_2335_path_3014_0_2263_527_8_2264_2287_5706_2288_2334_2 | 44   | hydroxysteroid dehydrogenase-like protein 2 | 778 | 3.93E-164 | 76.40% | 0.14  | IPR002347 (PRINTS); IPR016040 (G3DSA:3.40.50.GENE3D); IPR002198 (PFAM); PTHR24322:SF273 (PANTHER); PTHR24322 (PANTHER); TRANSMEMBRANE (PHOBIUS); NON_CYTOPLASMIC_DOMAIN (PHOBIUS); CYTOPLASMIC_DOMAIN (PHOBIUS); TRANSMEMBRANE (PHOBIUS); NON_CYTOPLASMIC_DOMAIN (PHOBIUS); CYTOPLASMIC_DOMAIN (PHOBIUS); SSF51735 (SUPERFAMILY); TMhelix (TMHMM); TMhelix (TMHMM); TMhelix (TMHMM)                                                                                                                                                                                                                                                                                                                                                |
| 601 | c2058_g1_i1_len_346_path_324_0_345_4                                    | 3    | xylosyltransferase oxt                      | 115 | 6.55E-33  | 59.40% | 0.177 | no IPS match                                                                                                                                                                                                                                                                                                                                                                                                                                                                                                                                                                                                                                                                                                                       |

|     |                                                               |     |                                                    |     |           |        |       |                                                                                                                                                                                                                                                                                                                                                                                                                                                                                                                                                                                                                                                                                                                                                                                                                    |
|-----|---------------------------------------------------------------|-----|----------------------------------------------------|-----|-----------|--------|-------|--------------------------------------------------------------------------------------------------------------------------------------------------------------------------------------------------------------------------------------------------------------------------------------------------------------------------------------------------------------------------------------------------------------------------------------------------------------------------------------------------------------------------------------------------------------------------------------------------------------------------------------------------------------------------------------------------------------------------------------------------------------------------------------------------------------------|
| 602 | c2064_g1_i1_len_1288_path_2268_0_1287_5                       | 25  | calcium calmodulin-dependent protein kinase        | 429 | 3.62E-101 | 91.70% | 0.106 | IPR008145 (SMART); IPR027417 (G3DSA:3.40.50.GENE3D); G3DSA:3.30.63.10 (GENE3D); IPR008145 (PFAM); PTHR23122 (PANTHER); PTHR23122:SF7 (PANTHER); IPR020590 (PROSITE_PATTERNS); CYTOPLASMIC_DOMAIN (PHOBIUS); NON_CYTOPLASMIC_DOMAIN (PHOBIUS); TRANSMEMBRANE (PHOBIUS); TRANSMEMBRANE (PHOBIUS); CYTOPLASMIC_DOMAIN (PHOBIUS); IPR008144 (PROSITE_PROFILES); IPR027417 (SUPERFAMILY)                                                                                                                                                                                                                                                                                                                                                                                                                                |
| 603 | c2064_g2_i1_len_518_path_1_0_517_1                            | 4   | peripheral plasma membrane protein cask isoform x2 | 173 | 2.98E-104 | 91.00% | 0.1   | IPR001452 (SMART); G3DSA:2.30.30.40 (GENE3D); IPR011511 (PFAM); PTHR23122:SF7 (PANTHER); PTHR23122 (PANTHER); IPR001452 (PROSITE_PROFILES); IPR001452 (SUPERFAMILY)                                                                                                                                                                                                                                                                                                                                                                                                                                                                                                                                                                                                                                                |
| 604 | c2065_g1_i1_len_1939_path_1_0_182_184_183_1938_0              | 98  | secreted frizzled-related protein 3                | 647 | 2.56E-78  | 59.70% | 0.133 | Coil (COILS); IPR018933 (SMART); IPR020067 (SMART); IPR018933 (PFAM); G3DSA:2.40.50.120 (GENE3D); IPR020067 (G3DSA:1.10.2000.GENE3D); IPR020067 (PFAM); PTHR11309:SF83 (PANTHER); IPR015526 (PANTHER); IPR020067 (PROSITE_PROFILES); IPR001134 (PROSITE_PROFILES); IPR008993 (SUPERFAMILY); IPR020067 (SUPERFAMILY)                                                                                                                                                                                                                                                                                                                                                                                                                                                                                                |
| 605 | c2065_g1_i2_len_2189_path_1_0_182_4127_183_432_184_433_2188_1 | 99  | secreted frizzled-related protein 3                | 730 | 5.53E-78  | 59.90% | 0.213 | Coil (COILS); IPR018933 (SMART); IPR020067 (SMART); IPR020067 (G3DSA:1.10.2000.GENE3D); IPR018933 (PFAM); IPR020067 (PFAM); G3DSA:2.40.50.120 (GENE3D); PTHR11309:SF83 (PANTHER); IPR015526 (PANTHER); TRANSMEMBRANE (PHOBIUS); CYTOPLASMIC_DOMAIN (PHOBIUS); TRANSMEMBRANE (PHOBIUS); NON_CYTOPLASMIC_DOMAIN (PHOBIUS); NON_CYTOPLASMIC_DOMAIN (PHOBIUS); IPR001134 (PROSITE_PROFILES); IPR020067 (PROSITE_PROFILES); IPR008993 (SUPERFAMILY); IPR020067 (SUPERFAMILY)                                                                                                                                                                                                                                                                                                                                            |
| 606 | c20692_g1_i1_len_2589_path_2643_0_2412_53_2413_2588_0         | 118 | low-density lipoprotein receptor                   | 857 | 1.39E-15  | 40.90% | 0.234 | IPR002172 (PRINTS); IPR000859 (SMART); IPR000998 (SMART); IPR002172 (SMART); IPR002172 (G3DSA:4.10.400.GENE3D); IPR000859 (G3DSA:2.60.120.GENE3D); IPR002172 (G3DSA:4.10.400.GENE3D); IPR002172 (PFAM); IPR000859 (PFAM); IPR002172 (G3DSA:4.10.400.GENE3D); IPR000998 (PFAM); PTHR23282 (PANTHER); PTHR23282:SF75 (PANTHER); TRANSMEMBRANE (PHOBIUS); NON_CYTOPLASMIC_DOMAIN (PHOBIUS); TRANSMEMBRANE (PHOBIUS); CYTOPLASMIC_DOMAIN (PHOBIUS); CYTOPLASMIC_DOMAIN (PHOBIUS); NON_CYTOPLASMIC_DOMAIN (PHOBIUS); TRANSMEMBRANE (PHOBIUS); IPR000859 (PROSITE_PROFILES); IPR000998 (PROSITE_PROFILES); IPR002172 (PROSITE_PROFILES); IPR000998 (PROSITE_PROFILES); IPR002172 (PROSITE_PROFILES); IPR013320 (SUPERFAMILY); IPR002172 (SUPERFAMILY); IPR013320 (SUPERFAMILY); IPR000859 (SUPERFAMILY); TMhelix (TMHMM) |
| 607 | c20697_g3_i1_len_638_path_616_0_637_4                         | 4   | atp-dependent partial                              | 213 | 5.04E-146 | 99.00% | 0.121 | IPR003593 (SMART); G3DSA:1.10.8.60 (GENE3D); IPR003959 (PFAM); IPR027417 (G3DSA:3.40.50.GENE3D); PTHR23076:SF10 (PANTHER); PTHR23076 (PANTHER); IPR003960 (PROSITE_PATTERNS); IPR027417 (SUPERFAMILY)                                                                                                                                                                                                                                                                                                                                                                                                                                                                                                                                                                                                              |
| 608 | c20723_g1_i2_len_885_path_515_0_542_514_543_884_3             | 19  | calumenin partial                                  | 290 | 1.01E-13  | 83.00% | 0.161 | IPR011992 (G3DSA:1.10.238.GENE3D); IPR018247 (PROSITE_PATTERNS); CYTOPLASMIC_DOMAIN (PHOBIUS); CYTOPLASMIC_DOMAIN (PHOBIUS); TRANSMEMBRANE (PHOBIUS); TRANSMEMBRANE (PHOBIUS); TRANSMEMBRANE (PHOBIUS); CYTOPLASMIC_DOMAIN (PHOBIUS); NON_CYTOPLASMIC_DOMAIN (PHOBIUS); NON_CYTOPLASMIC_DOMAIN (PHOBIUS); NON_CYTOPLASMIC_DOMAIN (PHOBIUS); TRANSMEMBRANE (PHOBIUS); TMhelix (TMHMM)                                                                                                                                                                                                                                                                                                                                                                                                                               |



|     |                                                                  |     |                                         |     |           |        |         |                                                                                                                                                                                                                                                                                                                                                                                                                                                                                                                                                                                                                                                                                                                                                                                                                                                                                |
|-----|------------------------------------------------------------------|-----|-----------------------------------------|-----|-----------|--------|---------|--------------------------------------------------------------------------------------------------------------------------------------------------------------------------------------------------------------------------------------------------------------------------------------------------------------------------------------------------------------------------------------------------------------------------------------------------------------------------------------------------------------------------------------------------------------------------------------------------------------------------------------------------------------------------------------------------------------------------------------------------------------------------------------------------------------------------------------------------------------------------------|
| 609 | c20732_g1_i1_len_1919_path_1989_0_172_2161_173_699_96_700_1918_0 | 221 | zinc finger protein 850-like isoform x1 | 634 | 1.26E-48  | 55.40% | 0.113   | IPR015880 (SMART); IPR013087 (G3DSA:3.30.160.GENE3D); IPR013087 (G3DSA:3.30.160.GENE3D); IPR013087 (G3DSA:3.30.160.GENE3D); IPR007087 (PFAM); PF13894 (PFAM); PF13465 (PFAM); IPR013087 (G3DSA:3.30.160.GENE3D); PTHR24409 (PANTHER); PTHR24409:SF14 (PANTHER); IPR007087 (PROSITE_PATTERNS); IPR007087 (PROSITE_PATTERNS); IPR007087 (PROSITE_PATTERNS); IPR007087 (PROSITE_PATTERNS); IPR007087 (PROSITE_PATTERNS); IPR007087 (PROSITE_PATTERNS); IPR007087 (PROSITE_PROFILES); SSF57667 (SUPERFAMILY); SSF57667 (SUPERFAMILY); SSF57667 (SUPERFAMILY); SSF57667 (SUPERFAMILY)                                                                             |
| 610 | c20732_g1_i2_len_1392_path_1989_0_172_96_173_1391_1              | 131 | zinc finger protein 850-like isoform x1 | 458 | 1.18E-49  | 55.60% | 0.145   | IPR015880 (SMART); PF13894 (PFAM); IPR013087 (G3DSA:3.30.160.GENE3D); IPR013087 (G3DSA:3.30.160.GENE3D); IPR013087 (G3DSA:3.30.160.GENE3D); PF13912 (PFAM); IPR013087 (G3DSA:3.30.160.GENE3D); PF13465 (PFAM); IPR007087 (PFAM); PTHR24409 (PANTHER); PTHR24409:SF14 (PANTHER); IPR007087 (PROSITE_PATTERNS); IPR007087 (PROSITE_PROFILES); SSF57667 (SUPERFAMILY); SSF57667 (SUPERFAMILY); SSF57667 (SUPERFAMILY); SSF57667 (SUPERFAMILY) |
| 611 | c20747_g1_i1_len_671_path_919_0_177_111_178_670_0                | 34  | adrenodoxin-like mitochondrial          | 217 | 9.22E-77  | 84.70% | 0.156   | IPR001055 (PRINTS); IPR012675 (G3DSA:3.10.20.GENE3D); IPR001041 (PFAM); PTHR23426 (PANTHER); PTHR23426:SF1 (PANTHER); IPR018298 (PROSITE_PATTERNS); IPR001041 (PROSITE_PROFILES); IPR001041 (SUPERFAMILY)                                                                                                                                                                                                                                                                                                                                                                                                                                                                                                                                                                                                                                                                      |
| 612 | c20747_g1_i2_len_758_path_919_0_177_24_178_264_111_265_757_0     | 34  | adrenodoxin-like mitochondrial          | 246 | 9.16E-73  | 86.90% | 0.155   | IPR001055 (PRINTS); IPR012675 (G3DSA:3.10.20.GENE3D); IPR001041 (PFAM); PTHR23426:SF1 (PANTHER); PTHR23426 (PANTHER); IPR018298 (PROSITE_PATTERNS); IPR001041 (PROSITE_PROFILES); IPR001041 (SUPERFAMILY)                                                                                                                                                                                                                                                                                                                                                                                                                                                                                                                                                                                                                                                                      |
| 613 | c20948_g1_i1_len_1045_path_1125_0_363_79_364_1044_5              | 60  | plasma alpha-l-fucosidase               | 348 | 1.02E-08  | 62.83% | 0.101   | PTHR10030:SF26 (PANTHER); IPR000933 (PANTHER); TRANSMEMBRANE (PHOBIUS); NON_CYTOPLASMIC_DOMAIN (PHOBIUS); NON_CYTOPLASMIC_DOMAIN (PHOBIUS); TRANSMEMBRANE (PHOBIUS); CYTOPLASMIC_DOMAIN (PHOBIUS)                                                                                                                                                                                                                                                                                                                                                                                                                                                                                                                                                                                                                                                                              |
| 614 | c20958_g1_i1_len_1057_path_1_0_1056_4                            | 10  | myoneurin-like isoform x1               | 352 | 1.78E-84  | 70.20% | 0.101   | IPR015880 (SMART); PF13894 (PFAM); PF13465 (PFAM); IPR013087 (G3DSA:3.30.160.GENE3D); IPR013087 (G3DSA:3.30.160.GENE3D); IPR007087 (PFAM); PF13909 (PFAM); PTHR24409 (PANTHER); PTHR24409:SF19 (PANTHER); IPR007087 (PROSITE_PATTERNS); IPR007087 (PROSITE_PATTERNS); IPR007087 (PROSITE_PROFILES); IPR007087 (PROSITE_PROFILES); IPR007087 (PROSITE_PROFILES); IPR007087 (PROSITE_PROFILES); SSF57667 (SUPERFAMILY); SSF57667 (SUPERFAMILY)                                                                                                                                                                                                                                                                                                                                                                                                                                   |
| 615 | c20984_g1_i1_len_2650_path_56_0_2649_4                           | 195 | exocyst complex component 3             | 877 | 0         | 74.20% | 0.135   | Coil (COILS); IPR010326 (PFAM); IPR010326 (PANTHER); PTHR21292:SF1 (PANTHER)                                                                                                                                                                                                                                                                                                                                                                                                                                                                                                                                                                                                                                                                                                                                                                                                   |
| 616 | c21003_g1_i1_len_1457_path_1435_0_1456_2                         | 74  | omega-amidase nit2-like                 | 485 | 3.56E-144 | 82.80% | 0.500 Y | IPR003010 (PFAM); IPR003010 (G3DSA:3.60.110.GENE3D); PTHR23088 (PANTHER); PTHR23088:SF20 (PANTHER); SIGNAL_PEPTIDE_C_REGION (PHOBIUS); CYTOPLASMIC_DOMAIN (PHOBIUS); TRANSMEMBRANE (PHOBIUS); SIGNAL_PEPTIDE (PHOBIUS); SIGNAL_PEPTIDE_H_REGION (PHOBIUS); SIGNAL_PEPTIDE_N_REGION (PHOBIUS); NON_CYTOPLASMIC_DOMAIN (PHOBIUS); IPR003010 (PROSITE_PROFILES); SignalP-noTM (SIGNALP_EUK); IPR003010 (SUPERFAMILY); TMhelix (TMHMM)                                                                                                                                                                                                                                                                                                                                                                                                                                             |

[illegible]

Supplementary Table 8

|     |                                                                                     |     |                                                               |      |           |        |         |                                                                                                                                                                                                                                                                                                                                                                                                                                                                                                                                                                                                          |
|-----|-------------------------------------------------------------------------------------|-----|---------------------------------------------------------------|------|-----------|--------|---------|----------------------------------------------------------------------------------------------------------------------------------------------------------------------------------------------------------------------------------------------------------------------------------------------------------------------------------------------------------------------------------------------------------------------------------------------------------------------------------------------------------------------------------------------------------------------------------------------------------|
| 630 | c2155_g1_i1_len_1610_path_1638_0_1609_0                                             | 86  | peptidyl-alpha-hydroxyglycine alpha-amidating lyase 2-like    | 531  | 1.02E-109 | 60.20% | 0.716 Y | IPR000720 (PRINTS); IPR001258 (PFAM); IPR011042 (G3DSA:2.120.10.GENE3D); PTHR10680 (PANTHER); SIGNAL_PEPTIDE_H_REGION (PHOBIUS); NON_CYTOPLASMIC_DOMAIN (PHOBIUS); SIGNAL_PEPTIDE (PHOBIUS); SIGNAL_PEPTIDE_C_REGION (PHOBIUS); SIGNAL_PEPTIDE_N_REGION (PHOBIUS); IPR013017 (PROSITE_PROFILES); IPR013017 (PROSITE_PROFILES); IPR013017 (PROSITE_PROFILES); IPR013017 (PROSITE_PROFILES); SignalP-noTM (SIGNALP_EUK); SSF101898 (SUPERFAMILY)                                                                                                                                                           |
| 631 | c2156_g2_i1_len_740_path_1430_0_739_3                                               | 17  | proprotein convertase subtilisin kexin type 7-like isoform x1 | 247  | 4.43E-68  | 58.30% | 0.645 Y | IPR008979 (G3DSA:2.60.120.GENE3D); IPR002884 (PFAM); IPR015500 (PANTHER); PTHR10795:SF9 (PANTHER); SignalP-noTM (SIGNALP_EUK); IPR008979 (SUPERFAMILY)                                                                                                                                                                                                                                                                                                                                                                                                                                                   |
| 632 | c21574_g1_i1_len_2100_path_2188_0_359_74_3_60_377_92_378_2099_0                     | 109 | annexin a4                                                    | 700  | 4.27E-90  | 66.90% | 0.102   | IPR001464 (PRINTS); IPR018502 (SMART); IPR018502 (G3DSA:1.10.220.GENE3D); IPR018502 (PFAM); IPR018502 (G3DSA:1.10.220.GENE3D); IPR018502 (G3DSA:1.10.220.GENE3D); IPR018502 (G3DSA:1.10.220.GENE3D); PTHR10502 (PANTHER); IPR018252 (PROSITE_PATTERNS); IPR018252 (PROSITE_PATTERNS); IPR018252 (PROSITE_PATTERNS); CYTOPLASMIC_DOMAIN (PHOBIUS); NON_CYTOPLASMIC_DOMAIN (PHOBIUS); TRANSMEMBRANE (PHOBIUS); NON_CYTOPLASMIC_DOMAIN (PHOBIUS); CYTOPLASMIC_DOMAIN (PHOBIUS); TRANSMEMBRANE (PHOBIUS); TRANSMEMBRANE (PHOBIUS); SSF47874 (SUPERFAMILY); TMhelix (TMHMM); TMhelix (TMHMM); TMhelix (TMHMM) |
| 633 | c21574_g1_i2_len_2082_path_2188_0_359_92_3_60_2081_0                                | 134 | annexin a4                                                    | 694  | 1.24E-91  | 67.90% | 0.102   | IPR001464 (PRINTS); IPR018502 (SMART); IPR018502 (G3DSA:1.10.220.GENE3D); IPR018502 (G3DSA:1.10.220.GENE3D); IPR018502 (G3DSA:1.10.220.GENE3D); IPR018502 (PFAM); IPR018502 (G3DSA:1.10.220.GENE3D); PTHR10502 (PANTHER); IPR018252 (PROSITE_PATTERNS); IPR018252 (PROSITE_PATTERNS); IPR018252 (PROSITE_PATTERNS); CYTOPLASMIC_DOMAIN (PHOBIUS); TRANSMEMBRANE (PHOBIUS); NON_CYTOPLASMIC_DOMAIN (PHOBIUS); TRANSMEMBRANE (PHOBIUS); NON_CYTOPLASMIC_DOMAIN (PHOBIUS); CYTOPLASMIC_DOMAIN (PHOBIUS); TRANSMEMBRANE (PHOBIUS); SSF47874 (SUPERFAMILY); TMhelix (TMHMM); TMhelix (TMHMM); TMhelix (TMHMM) |
| 634 | c21583_g1_i1_len_1343_path_1436_0_443_1879_444_1342_1                               | 18  | inactive tyrosine-protein kinase 7-like                       | 448  | 3.84E-143 | 62.00% | 0.211   | IPR003599 (SMART); IPR003598 (SMART); IPR013783 (G3DSA:2.60.40.GENE3D); IPR013783 (G3DSA:2.60.40.GENE3D); IPR013783 (G3DSA:2.60.40.GENE3D); IPR013098 (PFAM); PTHR26391:SF14 (PANTHER); PTHR26391 (PANTHER); IPR007110 (PROSITE_PROFILES); IPR007110 (PROSITE_PROFILES); IPR007110 (PROSITE_PROFILES); SSF48726 (SUPERFAMILY); SSF48726 (SUPERFAMILY); SSF48726 (SUPERFAMILY); SSF48726 (SUPERFAMILY)                                                                                                                                                                                                    |
| 635 | c21589_g1_i1_len_3409_path_1_0_2040_2042_2_041_2064_2042_2065_2088_4187_2089_3408_0 | 625 | zinc finger protein on ecdysone puffs                         | 1131 | 1.50E-55  | 63.50% | 0.131   | Coil (COILS); Coil (COILS); Coil (COILS); Coil (COILS); G3DSA:1.10.601.10 (GENE3D); PF12874 (PFAM); IPR026811 (PTHR15491:PANTHER); PTHR15491 (PANTHER); IPR007087 (PROSITE_PATTERNS); NON_CYTOPLASMIC_DOMAIN (PHOBIUS); CYTOPLASMIC_DOMAIN (PHOBIUS); TRANSMEMBRANE (PHOBIUS); TRANSMEMBRANE (PHOBIUS); CYTOPLASMIC_DOMAIN (PHOBIUS); TMhelix (TMHMM); TMhelix (TMHMM)                                                                                                                                                                                                                                   |

|     |                                                                                 |     |                                                                    |      |           |        |       |                                                                                                                                                                                                                                                                                                                                                                                                                                                                                                                                                                                                                                                                                                                                                                                                                                                                                                                                                                                                                                                                                                                   |
|-----|---------------------------------------------------------------------------------|-----|--------------------------------------------------------------------|------|-----------|--------|-------|-------------------------------------------------------------------------------------------------------------------------------------------------------------------------------------------------------------------------------------------------------------------------------------------------------------------------------------------------------------------------------------------------------------------------------------------------------------------------------------------------------------------------------------------------------------------------------------------------------------------------------------------------------------------------------------------------------------------------------------------------------------------------------------------------------------------------------------------------------------------------------------------------------------------------------------------------------------------------------------------------------------------------------------------------------------------------------------------------------------------|
| 636 | c21590_g1_i2_len_3280_path_991_0_2823_63_2_824_3279_1                           | 207 | zinc finger protein 184-like                                       | 1075 | 0         | 59.00% | 0.163 | Coil (COILS); IPR015880 (SMART); IPR007087 (PFAM); IPR013087 (G3DSA:3.30.160.GENE3D); PF13465 (PFAM); IPR013087 (G3DSA:3.30.160.GENE3D); PF13912 (PFAM); PF13894 (PFAM); IPR013087 (G3DSA:3.30.160.GENE3D); IPR013087 (G3DSA:3.30.160.GENE3D); IPR013087 (G3DSA:3.30.160.GENE3D); PTHR24409 (PANTHER); IPR007087 (PROSITE_PATTERNS); IPR007087 (PROSITE_PROFILES); SSF57667 (SUPERFAMILY); SSF57667 (SUPERFAMILY); SSF57667 (SUPERFAMILY); SSF57667 (SUPERFAMILY); SSF57667 (SUPERFAMILY) |
| 637 | c2176_g1_i1_len_1158_path_53_0_1157_1                                           | 39  | dentin matrix protein 4-like                                       | 374  | 0         | 85.00% | 0.099 | IPR009581 (PFAM); PTHR12450:SF8 (PANTHER); IPR024869 (PANTHER) IPR002130 (PRINTS); IPR001680 (SMART); IPR002130 (PFAM); IPR001680 (PFAM); IPR029000 (G3DSA:2.40.100.GENE3D); IPR015943 (G3DSA:2.130.10.GENE3D); IPR024936 (PANTHER); PTHR11071:SF228 (PANTHER); IPR017986 (PROSITE_PROFILES); IPR002130 (PROSITE_PROFILES); IPR029000 (SUPERFAMILY); IPR017986 (SUPERFAMILY)                                                                                                                                                                                                                                                                                                                                                                                                                                                                                                                                                                                                                                                                                                                                      |
| 638 | c21787_g1_i1_len_2282_path_53_0_2281_2                                          | 193 | peptidylprolyl isomerase domain and wd repeat-containing protein 1 | 755  | 0         | 84.50% | 0.108 | IPR023796 (SMART); G3DSA:2.30.39.10 (GENE3D); G3DSA:3.30.497.10 (GENE3D); IPR023796 (PFAM); IPR000215 (PANTHER); IPR023795 (PROSITE_PATTERNS); CYTOPLASMIC_DOMAIN (PHOBIUS); NON_CYTOPLASMIC_DOMAIN (PHOBIUS); TRANSMEMBRANE (PHOBIUS); IPR023796 (SUPERFAMILY); TMhelix (TMHMM)                                                                                                                                                                                                                                                                                                                                                                                                                                                                                                                                                                                                                                                                                                                                                                                                                                  |
| 639 | c21812_g1_i1_len_1612_path_1_0_538_540_539_1611_4                               | 72  | serine proteinase inhibitor b3                                     | 532  | 5.13E-73  | 53.90% | 0.173 | Coil (COILS); IPR020472 (PRINTS); IPR001680 (SMART); IPR007148 (PFAM); IPR015943 (G3DSA:2.130.10.GENE3D); IPR001680 (PFAM); IPR015943 (G3DSA:2.130.10.GENE3D); IPR015943 (G3DSA:2.130.10.GENE3D); PTHR19853:SF0 (PANTHER); PTHR19853 (PANTHER); IPR019775 (PROSITE_PATTERNS); IPR019775 (PROSITE_PATTERNS); IPR019775 (PROSITE_PATTERNS); IPR001680 (PROSITE_PROFILES); IPR001680 (PROSITE_PROFILES); IPR001680 (PROSITE_PROFILES); IPR017986 (PROSITE_PROFILES); IPR001680 (PROSITE_PROFILES); IPR001680 (PROSITE_PROFILES); IPR001680 (PROSITE_PROFILES); IPR001680 (PROSITE_PROFILES); IPR017986 (SUPERFAMILY); IPR017986 (SUPERFAMILY)                                                                                                                                                                                                                                                                                                                                                                                                                                                                        |
| 640 | c2183_g1_i1_len_3115_path_55_0_1068_1123_1_069_1069_27_1070_3114_2              | 176 | wd repeat-containing protein 3                                     | 1032 | 0         | 73.90% | 0.325 | IPR001806 (PRINTS); IPR024156 (SMART); IPR002041 (SMART); IPR003578 (SMART); IPR003579 (SMART); IPR020849 (SMART); IPR001806 (PFAM); IPR027417 (G3DSA:3.40.50.GENE3D); IPR005225 (TIGRFAM); PTHR24073 (PANTHER); PTHR24073:SF456 (PANTHER); CYTOPLASMIC_DOMAIN (PHOBIUS); NON_CYTOPLASMIC_DOMAIN (PHOBIUS); TRANSMEMBRANE (PHOBIUS); PS51419 (PROSITE_PROFILES); IPR027417 (SUPERFAMILY)                                                                                                                                                                                                                                                                                                                                                                                                                                                                                                                                                                                                                                                                                                                          |
| 641 | c21835_g1_i2_len_1636_path_371_0_187_160_1_88_1635_0                            | 292 | ras-related protein rab-10                                         | 546  | 3.17E-116 | 92.90% | 0.209 | G3DSA:3.30.1120.10 (GENE3D); IPR000917 (PFAM); IPR017849 (G3DSA:3.40.720.GENE3D); PTHR10342:SF206 (PANTHER); PTHR10342 (PANTHER); IPR024607 (PROSITE_PATTERNS); IPR017850 (SUPERFAMILY)                                                                                                                                                                                                                                                                                                                                                                                                                                                                                                                                                                                                                                                                                                                                                                                                                                                                                                                           |
| 642 | c21845_g1_i1_len_1560_path_1600_0_1385_298_4_1386_1388_2987_1389_1559_4         | 59  | arylsulfatase b-like                                               | 514  | 7.72E-143 | 66.20% | 0.171 | IPR001846 (SMART); IPR015255 (PFAM); IPR001846 (PFAM); PTHR23345:SF1 (PANTHER); PTHR23345 (PANTHER); TRANSMEMBRANE (PHOBIUS); CYTOPLASMIC_DOMAIN (PHOBIUS); NON_CYTOPLASMIC_DOMAIN (PHOBIUS); IPR001846 (PROSITE_PROFILES); IPR015819 (SUPERFAMILY)                                                                                                                                                                                                                                                                                                                                                                                                                                                                                                                                                                                                                                                                                                                                                                                                                                                               |
| 643 | c21858_g1_i1_len_2656_path_2634_0_236_2871_237_238_2873_239_376_3011_377_2655_5 | 265 | vitellogenin 2                                                     | 879  | 2.10E-66  | 43.80% | 0.129 | IPR001846 (SMART); IPR001846 (PFAM); IPR015255 (PFAM); PTHR23345:SF1 (PANTHER); PTHR23345 (PANTHER); IPR001846 (PROSITE_PROFILES); IPR015819 (SUPERFAMILY)                                                                                                                                                                                                                                                                                                                                                                                                                                                                                                                                                                                                                                                                                                                                                                                                                                                                                                                                                        |
| 644 | c21858_g1_i2_len_2718_path_5267_0_438_3011_439_2717_5                           | 139 | vitellogenin 2                                                     | 906  | 2.38E-62  | 43.70% | 0.129 | IPR001846 (SMART); IPR001846 (PFAM); IPR015255 (PFAM); PTHR23345:SF1 (PANTHER); PTHR23345 (PANTHER); IPR001846 (PROSITE_PROFILES); IPR015819 (SUPERFAMILY)                                                                                                                                                                                                                                                                                                                                                                                                                                                                                                                                                                                                                                                                                                                                                                                                                                                                                                                                                        |



|     |                                                                               |      |                                                |     |           |        |       |                                                                                                                                                                                                                                                                                                                                                                                                                                                                                                                                                                                                                                                              |
|-----|-------------------------------------------------------------------------------|------|------------------------------------------------|-----|-----------|--------|-------|--------------------------------------------------------------------------------------------------------------------------------------------------------------------------------------------------------------------------------------------------------------------------------------------------------------------------------------------------------------------------------------------------------------------------------------------------------------------------------------------------------------------------------------------------------------------------------------------------------------------------------------------------------------|
| 645 | c21876_g1_i1_len_1674_path_1652_0_1673_2                                      | 48   | hemacentin-2 isoform x3                        | 552 | 1.05E-90  | 67.40% | 0.204 | IPR003598 (SMART); IPR003599 (SMART); IPR013783 (G3DSA:2.60.40.GENE3D); IPR013783 (G3DSA:2.60.40.GENE3D); IPR013098 (PFAM); PTHR23279 (PANTHER); TRANSMEMBRANE (PHOBIUS); CYTOPLASMIC_DOMAIN (PHOBIUS); NON_CYTOPLASMIC_DOMAIN (PHOBIUS); NON_CYTOPLASMIC_DOMAIN (PHOBIUS); TRANSMEMBRANE (PHOBIUS); TRANSMEMBRANE (PHOBIUS); TRANSMEMBRANE (PHOBIUS); NON_CYTOPLASMIC_DOMAIN (PHOBIUS); CYTOPLASMIC_DOMAIN (PHOBIUS); TRANSMEMBRANE (PHOBIUS); CYTOPLASMIC_DOMAIN (PHOBIUS); IPR007110 (PROSITE_PROFILES); IPR007110 (PROSITE_PROFILES); SSF48726 (SUPERFAMILY); SSF48726 (SUPERFAMILY); TMhelix (TMHMM); TMhelix (TMHMM); TMhelix (TMHMM); TMhelix (TMHMM) |
| 646 | c21890_g2_i2_len_365_path_1_0_212_562_213_364_4                               | 63   | trypsin-like proteinase                        | 109 | 6.31E-08  | 72.30% | 0.275 | IPR001254 (PFAM); G3DSA:2.40.10.10 (GENE3D); PTHR24275 (PANTHER); IPR009003 (SUPERFAMILY)                                                                                                                                                                                                                                                                                                                                                                                                                                                                                                                                                                    |
| 647 | c21925_g2_i1_len_459_path_1107_0_304_1411_305_310_62_311_458_0                | 2417 | isoform b                                      | 153 | 4.75E-26  | 55.00% | 0.101 | IPR001314 (PRINTS); IPR001254 (SMART); IPR001254 (PFAM); G3DSA:2.40.10.10 (GENE3D); G3DSA:2.40.10.10 (GENE3D); PTHR24260 (PANTHER); IPR018114 (PROSITE_PATTERNS); IPR001254 (PROSITE_PROFILES); IPR009003 (SUPERFAMILY)                                                                                                                                                                                                                                                                                                                                                                                                                                      |
| 648 | c22032_g1_i2_len_1576_path_141_0_104_245_1_05_239_140_240_1575_0              | 37   | ---NA---                                       | 526 |           |        | 0.104 | CYTOPLASMIC_DOMAIN (PHOBIUS); NON_CYTOPLASMIC_DOMAIN (PHOBIUS); CYTOPLASMIC_DOMAIN (PHOBIUS); TRANSMEMBRANE (PHOBIUS); TRANSMEMBRANE (PHOBIUS); TRANSMEMBRANE (PHOBIUS); NON_CYTOPLASMIC_DOMAIN (PHOBIUS); TMhelix (TMHMM); TMhelix (TMHMM)                                                                                                                                                                                                                                                                                                                                                                                                                  |
| 649 | c22052_g1_i2_len_1192_path_61_0_362_424_36_3_1036_60_1037_1191_3              | 26   | sortilin-related receptor-like                 | 398 | 7.32E-55  | 58.20% | 0.117 | IPR013783 (G3DSA:2.60.40.GENE3D); PTHR12106 (PANTHER); TRANSMEMBRANE (PHOBIUS); NON_CYTOPLASMIC_DOMAIN (PHOBIUS); CYTOPLASMIC_DOMAIN (PHOBIUS); IPR003961 (SUPERFAMILY); TMhelix (TMHMM)                                                                                                                                                                                                                                                                                                                                                                                                                                                                     |
| 650 | c22052_g1_i3_len_1216_path_61_0_362_2465_3_63_386_424_387_1060_60_1061_1215_3 | 22   | sortilin-related receptor-like                 | 406 | 9.96E-55  | 56.80% | 0.117 | IPR013783 (G3DSA:2.60.40.GENE3D); PTHR12106 (PANTHER); NON_CYTOPLASMIC_DOMAIN (PHOBIUS); TRANSMEMBRANE (PHOBIUS); CYTOPLASMIC_DOMAIN (PHOBIUS); IPR003961 (SUPERFAMILY); TMhelix (TMHMM)                                                                                                                                                                                                                                                                                                                                                                                                                                                                     |
| 651 | c22159_g1_i1_len_1292_path_49_0_882_2629_8_83_888_48_889_1291_3               | 1165 | isoform b                                      | 425 | 6.91E-48  | 62.20% | 0.149 | IPR003585 (SMART); IPR027789 (PFAM); IPR001050 (PANTHER); PTHR10915:SF1 (PANTHER); IPR030479 (PROSITE_PATTERNS); NON_CYTOPLASMIC_DOMAIN (PHOBIUS); CYTOPLASMIC_DOMAIN (PHOBIUS); TRANSMEMBRANE (PHOBIUS); TRANSMEMBRANE (PHOBIUS); CYTOPLASMIC_DOMAIN (PHOBIUS); TMhelix (TMHMM)                                                                                                                                                                                                                                                                                                                                                                             |
| 652 | c22271_g1_i1_len_2501_path_105_0_2500_2                                       | 222  | inversin-like isoform x3                       | 827 | 1.96E-58  | 74.30% | 0.219 | IPR000048 (SMART); IPR002110 (SMART); IPR000048 (PFAM); IPR020683 (G3DSA:1.25.40.GENE3D); IPR020683 (PFAM); PTHR24178 (PANTHER); NON_CYTOPLASMIC_DOMAIN (PHOBIUS); CYTOPLASMIC_DOMAIN (PHOBIUS); TRANSMEMBRANE (PHOBIUS); IPR000048 (PROSITE_PROFILES); IPR002110 (PROSITE_PROFILES); IPR002110 (PROSITE_PROFILES); IPR002110 (PROSITE_PROFILES); IPR020683 (PROSITE_PROFILES); IPR020683 (SUPERFAMILY)                                                                                                                                                                                                                                                      |
| 653 | c22296_g1_i1_len_404_path_1645_0_172_1818_173_223_1869_224_403_3              | 0    | hypothetical protein DAPPUDRAFT_54608, partial | 135 | 1.53E-07  | 43.00% | 0.323 | G3DSA:2.40.10.10 (GENE3D); NON_CYTOPLASMIC_DOMAIN (PHOBIUS); CYTOPLASMIC_DOMAIN (PHOBIUS); TRANSMEMBRANE (PHOBIUS); IPR009003 (SUPERFAMILY); TMhelix (TMHMM)                                                                                                                                                                                                                                                                                                                                                                                                                                                                                                 |
| 654 | c22300_g1_i1_len_696_path_73_0_135_24_136_156_229_157_188_260_189_695_1       | 9    | brasiliensin precursor                         | 232 | 1.15E-27  | 49.80% | 0.117 | IPR002350 (SMART); G3DSA:3.30.60.30 (GENE3D); IPR002350 (PFAM); PTHR10913 (PANTHER); PTHR10913:SF46 (PANTHER); IPR002350 (PROSITE_PROFILES); IPR002350 (PROSITE_PROFILES); IPR002350 (PROSITE_PROFILES); IPR002350 (PROSITE_PROFILES); SSF100895 (SUPERFAMILY); SSF100895 (SUPERFAMILY); SSF100895 (SUPERFAMILY); SSF100895 (SUPERFAMILY)                                                                                                                                                                                                                                                                                                                    |
| 655 | c2234_g1_i1_len_1236_path_53_0_1235_5                                         | 49   | ras-related protein rab-4b                     | 404 | 6.47E-135 | 94.30% | 0.225 | IPR001806 (PRINTS); IPR003579 (SMART); IPR003578 (SMART); IPR020849 (SMART); IPR024156 (SMART); IPR002041 (SMART); IPR001806 (PFAM); IPR027417 (G3DSA:3.40.50.GENE3D); IPR005225 (TIGRFAM); PTHR24073:SF387 (PANTHER); PTHR24073 (PANTHER); TRANSMEMBRANE (PHOBIUS); NON_CYTOPLASMIC_DOMAIN (PHOBIUS); NON_CYTOPLASMIC_DOMAIN (PHOBIUS); CYTOPLASMIC_DOMAIN (PHOBIUS); TRANSMEMBRANE (PHOBIUS); TRANSMEMBRANE (PHOBIUS); CYTOPLASMIC_DOMAIN (PHOBIUS); PS51419 (PROSITE_PROFILES); IPR027417 (SUPERFAMILY); TMhelix (TMHMM)                                                                                                                                  |

|     |                                                                       |     |                                                       |     |           |        |         |                                                                                                                                                                                                                                                                                                                                                                                                                                                                                                                                                                                                                                                   |
|-----|-----------------------------------------------------------------------|-----|-------------------------------------------------------|-----|-----------|--------|---------|---------------------------------------------------------------------------------------------------------------------------------------------------------------------------------------------------------------------------------------------------------------------------------------------------------------------------------------------------------------------------------------------------------------------------------------------------------------------------------------------------------------------------------------------------------------------------------------------------------------------------------------------------|
| 656 | c22444_g1_i1_len_2328_path_2406_0_2327_0                              | 103 | maltase 2-like                                        | 776 | 0         | 65.50% | 0.103   | IPR006589 (SMART); G3DSA:3.90.400.10 (GENE3D); IPR006047 (PFAM); IPR013781 (G3DSA:3.20.20.GENE3D); IPR015902 (PANTHER); PTHR10357:SF76 (PANTHER); TRANSMEMBRANE (PHOBIUS); CYTOPLASMIC_DOMAIN (PHOBIUS); TRANSMEMBRANE (PHOBIUS); TRANSMEMBRANE (PHOBIUS); CYTOPLASMIC_DOMAIN (PHOBIUS); NON_CYTOPLASMIC_DOMAIN (PHOBIUS); NON_CYTOPLASMIC_DOMAIN (PHOBIUS); IPR017853 (SUPERFAMILY)                                                                                                                                                                                                                                                              |
| 657 | c22466_g1_i1_len_1838_path_729_0_1490_2329_1491_1491_25_1492_1837_2   | 54  | microfibrillar-associated protein 1-like              | 607 | 9.90E-176 | 78.00% | 0.1     | Coil (COILS); Coil (COILS); Coil (COILS); Coil (COILS); IPR009730 (PFAM); IPR009730 (PANTHER); PTHR15327:SF0 (PANTHER); CYTOPLASMIC_DOMAIN (PHOBIUS); TRANSMEMBRANE (PHOBIUS); NON_CYTOPLASMIC_DOMAIN (PHOBIUS); CYTOPLASMIC_DOMAIN (PHOBIUS); TRANSMEMBRANE (PHOBIUS); TMhelix (TMHMM)                                                                                                                                                                                                                                                                                                                                                           |
| 658 | c22466_g1_i2_len_1574_path_729_0_1490_2329_1491_1491_2330_1492_1573_2 | 54  | microfibrillar-associated protein 1-like              | 524 | 4.09E-177 | 77.80% | 0.1     | Coil (COILS); Coil (COILS); Coil (COILS); Coil (COILS); IPR009730 (PFAM); IPR009730 (PANTHER); PTHR15327:SF0 (PANTHER)                                                                                                                                                                                                                                                                                                                                                                                                                                                                                                                            |
| 659 | c225_g1_i1_len_2167_path_53_0_2166_0                                  | 310 | dehydrogenase reductase sdr family member 11-like     | 716 | 5.76E-111 | 77.10% | 0.165   | IPR002347 (PRINTS); IPR002198 (PRINTS); IPR013968 (SMART); IPR002198 (PFAM); IPR016040 (G3DSA:3.40.50.GENE3D); PTHR24322:SF78 (PANTHER); PTHR24322 (PANTHER); IPR020904 (PROSITE_PATTERNS); TRANSMEMBRANE (PHOBIUS); NON_CYTOPLASMIC_DOMAIN (PHOBIUS); CYTOPLASMIC_DOMAIN (PHOBIUS); TRANSMEMBRANE (PHOBIUS); TRANSMEMBRANE (PHOBIUS); CYTOPLASMIC_DOMAIN (PHOBIUS); TRANSMEMBRANE (PHOBIUS); NON_CYTOPLASMIC_DOMAIN (PHOBIUS); NON_CYTOPLASMIC_DOMAIN (PHOBIUS); CYTOPLASMIC_DOMAIN (PHOBIUS); TRANSMEMBRANE (PHOBIUS); CYTOPLASMIC_DOMAIN (PHOBIUS); SSF51735 (SUPERFAMILY); TMhelix (TMHMM); TMhelix (TMHMM); TMhelix (TMHMM); TMhelix (TMHMM) |
| 660 | c22705_g2_i1_len_450_path_2473_0_87_551_88_204_2829_205_449_0         | 4   | ves g 5 allergen                                      | 150 | 1.14E-21  | 55.90% | 0.359 Y | IPR014044 (G3DSA:3.40.33.GENE3D); IPR014044 (PFAM); IPR001283 (PANTHER); TRANSMEMBRANE (PHOBIUS); NON_CYTOPLASMIC_DOMAIN (PHOBIUS); CYTOPLASMIC_DOMAIN (PHOBIUS); IPR014044 (SUPERFAMILY)                                                                                                                                                                                                                                                                                                                                                                                                                                                         |
| 661 | c22717_g1_i2_len_1429_path_1904_0_867_224_868_1428_0                  | 35  | cyclin-dependent kinase 6-like                        | 477 | 2.07E-137 | 78.80% | 0.099   | IPR002290 (SMART); G3DSA:1.10.510.10 (GENE3D); G3DSA:3.30.200.20 (GENE3D); IPR000719 (PFAM); PTHR24056 (PANTHER); PTHR24056:SF180 (PANTHER); IPR017441 (PROSITE_PATTERNS); IPR008271 (PROSITE_PATTERNS); TRANSMEMBRANE (PHOBIUS); CYTOPLASMIC_DOMAIN (PHOBIUS); NON_CYTOPLASMIC_DOMAIN (PHOBIUS); IPR000719 (PROSITE_PROFILES); IPR011009 (SUPERFAMILY); TMhelix (TMHMM)                                                                                                                                                                                                                                                                          |
| 662 | c22782_g1_i1_len_2191_path_2169_0_2190_0                              | 203 | lethal giant larvae protein homolog 1-like isoform x5 | 725 | 0         | 75.60% | 0.167   | IPR000664 (PRINTS); IPR001680 (SMART); IPR013577 (PFAM); IPR015943 (G3DSA:2.130.10.GENE3D); PTHR10241:SF28 (PANTHER); PTHR10241 (PANTHER); IPR019775 (PROSITE_PATTERNS); IPR019775 (PROSITE_PATTERNS); NON_CYTOPLASMIC_DOMAIN (PHOBIUS); TRANSMEMBRANE (PHOBIUS); CYTOPLASMIC_DOMAIN (PHOBIUS); IPR017986 (PROSITE_PROFILES); IPR001680 (PROSITE_PROFILES); IPR011047 (SUPERFAMILY); IPR017986 (SUPERFAMILY); TMhelix (TMHMM)                                                                                                                                                                                                                     |
| 663 | c2280_g1_i1_len_1405_path_1_0_460_462_461_1404_0                      | 35  | plasma kallikrein                                     | 469 | 1.72E-29  | 48.70% | 0.159   | IPR001314 (PRINTS); IPR001254 (SMART); IPR001254 (PFAM); G3DSA:2.40.10.10 (GENE3D); G3DSA:2.40.10.10 (GENE3D); G3DSA:2.40.10.10 (GENE3D); PTHR24276 (PANTHER); IPR018114 (PROSITE_PATTERNS); NON_CYTOPLASMIC_DOMAIN (PHOBIUS); TRANSMEMBRANE (PHOBIUS); CYTOPLASMIC_DOMAIN (PHOBIUS); IPR001254 (PROSITE_PROFILES); IPR009003 (SUPERFAMILY); TMhelix (TMHMM); TMhelix (TMHMM)                                                                                                                                                                                                                                                                     |
| 664 | c2280_g1_i2_len_579_path_1_0_460_2906_461_578_0                       | 8   | mite allergen der f 3-like                            | 193 | 1.42E-07  | 47.60% | 0.159   | IPR001254 (PFAM); G3DSA:2.40.10.10 (GENE3D); PTHR24276 (PANTHER); IPR018114 (PROSITE_PATTERNS); IPR009003 (SUPERFAMILY)                                                                                                                                                                                                                                                                                                                                                                                                                                                                                                                           |
| 665 | c2281_g2_i1_len_146_path_594_0_145_1                                  | 0   | ---NA---                                              | 49  |           |        | 0.106   | no IPS match                                                                                                                                                                                                                                                                                                                                                                                                                                                                                                                                                                                                                                      |
| 666 | c22877_g1_i1_len_1771_path_2032_0_191_142_192_1770_1                  | 180 | polycomb protein eed                                  | 585 | 0         | 85.20% | 0.139   | IPR001680 (SMART); IPR001680 (PFAM); IPR015943 (G3DSA:2.130.10.GENE3D); PTHR10253 (PANTHER); IPR019775 (PROSITE_PATTERNS); IPR017986 (PROSITE_PROFILES); IPR001680 (PROSITE_PROFILES); IPR001680 (PROSITE_PROFILES); IPR017986 (SUPERFAMILY)                                                                                                                                                                                                                                                                                                                                                                                                      |

|     |                                                                                                   |     |                                                    |      |           |        |         |                                                                                                                                                                                                                                                                                                                                                                                                                                                                                                                                                                                                                   |
|-----|---------------------------------------------------------------------------------------------------|-----|----------------------------------------------------|------|-----------|--------|---------|-------------------------------------------------------------------------------------------------------------------------------------------------------------------------------------------------------------------------------------------------------------------------------------------------------------------------------------------------------------------------------------------------------------------------------------------------------------------------------------------------------------------------------------------------------------------------------------------------------------------|
| 667 | c22877_g1_i2_len_1720_path_1_0_140_142_141_1719_1                                                 | 176 | polycomb protein eed                               | 568  | 0         | 84.80% | 0.101   | IPR001680 (SMART); IPR001680 (PFAM); IPR015943 (G3DSA:2.130.10.GENE3D); PTHR10253 (PANTHER); IPR019775 (PROSITE_PATTERNS); IPR017986 (PROSITE_PROFILES); IPR001680 (PROSITE_PROFILES); IPR001680 (PROSITE_PROFILES); IPR017986 (SUPERFAMILY)                                                                                                                                                                                                                                                                                                                                                                      |
| 668 | c22914_g1_i1_len_1638_path_53_0_1637_2                                                            | 49  | aldehyde dimeric nadp-preferring isoform x4        | 540  | 0         | 74.30% | 0.108   | IPR012394 (PIRSF); IPR016163 (G3DSA:3.40.309.GENE3D); IPR015590 (PFAM); IPR016162 (G3DSA:3.40.605.GENE3D); PTHR11699 (PANTHER); PTHR11699:SF15 (PANTHER); IPR029510 (PROSITE_PATTERNS); TRANSMEMBRANE (PHOBIUS); NON_CYTOPLASMIC_DOMAIN (PHOBIUS); CYTOPLASMIC_DOMAIN (PHOBIUS); IPR016161 (SUPERFAMILY); TMhelix (TMHMM)                                                                                                                                                                                                                                                                                         |
| 669 | c22979_g1_i1_len_711_path_6519_0_91_6610_9_2_92_318_93_425_621_426_642_6988_643_643_160_644_710_2 | 32  | carboxyl cholinesterase 5bs                        | 237  | 2.15E-08  | 64.10% | 0.104   | IPR029058 (G3DSA:3.40.50.GENE3D); IPR002018 (PFAM); PTHR11559 (PANTHER); PTHR11559:SF142 (PANTHER); NON_CYTOPLASMIC_DOMAIN (PHOBIUS); CYTOPLASMIC_DOMAIN (PHOBIUS); CYTOPLASMIC_DOMAIN (PHOBIUS); TRANSMEMBRANE (PHOBIUS); NON_CYTOPLASMIC_DOMAIN (PHOBIUS); CYTOPLASMIC_DOMAIN (PHOBIUS); TRANSMEMBRANE (PHOBIUS); TRANSMEMBRANE (PHOBIUS); TRANSMEMBRANE (PHOBIUS); IPR029058 (SUPERFAMILY); TMhelix (TMHMM)                                                                                                                                                                                                    |
| 670 | c22979_g1_i2_len_2517_path_319_0_301_621_3_02_518_6988_519_519_837_520_2516_1                     | 171 | venom carboxylesterase-6 isoform x2                | 839  | 2.87E-136 | 58.30% | 0.132   | IPR029058 (G3DSA:3.40.50.GENE3D); IPR002018 (PFAM); PTHR11559 (PANTHER); IPR019819 (PROSITE_PATTERNS); IPR019826 (PROSITE_PATTERNS); TRANSMEMBRANE (PHOBIUS); NON_CYTOPLASMIC_DOMAIN (PHOBIUS); CYTOPLASMIC_DOMAIN (PHOBIUS); TRANSMEMBRANE (PHOBIUS); NON_CYTOPLASMIC_DOMAIN (PHOBIUS); IPR029058 (SUPERFAMILY)                                                                                                                                                                                                                                                                                                  |
| 671 | c22979_g1_i3_len_285_path_621_0_216_25_217_284_2                                                  | 0   | carboxyl cholinesterase 5bs                        | 95   | 5.62E-09  | 67.00% | 0.909 Y | IPR029058 (G3DSA:3.40.50.GENE3D); IPR002018 (PFAM); SIGNAL_PEPTIDE_N_REGION (PHOBIUS); SIGNAL_PEPTIDE_C_REGION (PHOBIUS); NON_CYTOPLASMIC_DOMAIN (PHOBIUS); SIGNAL_PEPTIDE (PHOBIUS); SIGNAL_PEPTIDE_H_REGION (PHOBIUS); SignalP-noTM (SIGNALP_GRAM_NEGATIVE); SignalP-noTM (SIGNALP_EUK); SignalP-TM (SIGNALP_GRAM_POSITIVE); IPR029058 (SUPERFAMILY)                                                                                                                                                                                                                                                            |
| 672 | c22998_g1_i1_len_997_path_1075_0_965_2082_966_996_0                                               | 107 | e3 ubiquitin-protein ligase rnf185-like isoform x2 | 333  | 8.34E-88  | 81.00% | 0.113   | IPR001841 (SMART); IPR013083 (G3DSA:3.30.40.GENE3D); PF13923 (PFAM); PTHR12313:SF3 (PANTHER); PTHR12313 (PANTHER); IPR017907 (PROSITE_PATTERNS); TRANSMEMBRANE (PHOBIUS); TRANSMEMBRANE (PHOBIUS); NON_CYTOPLASMIC_DOMAIN (PHOBIUS); NON_CYTOPLASMIC_DOMAIN (PHOBIUS); CYTOPLASMIC_DOMAIN (PHOBIUS); CYTOPLASMIC_DOMAIN (PHOBIUS); TRANSMEMBRANE (PHOBIUS); IPR001841 (PROSITE_PROFILES); SSF57850 (SUPERFAMILY); TMhelix (TMHMM); TMhelix (TMHMM); TMhelix (TMHMM)                                                                                                                                               |
| 673 | c23129_g1_i1_len_3022_path_103_0_2310_2411_2311_2311_102_2312_3021_2                              | 514 | titin- partial                                     | 1000 | 2.55E-153 | 70.40% | 0.1     | PR00014 (PRINTS); IPR003961 (SMART); IPR013783 (G3DSA:2.60.40.GENE3D); IPR003961 (PFAM); IPR013783 (G3DSA:2.60.40.GENE3D); PTHR19897 (PANTHER); PTHR19897:SF142 (PANTHER); NON_CYTOPLASMIC_DOMAIN (PHOBIUS); TRANSMEMBRANE (PHOBIUS); CYTOPLASMIC_DOMAIN (PHOBIUS); TRANSMEMBRANE (PHOBIUS); CYTOPLASMIC_DOMAIN (PHOBIUS); NON_CYTOPLASMIC_DOMAIN (PHOBIUS); TRANSMEMBRANE (PHOBIUS); IPR003961 (PROSITE_PROFILES); IPR003961 (PROSITE_PROFILES); IPR003961 (PROSITE_PROFILES); IPR003961 (PROSITE_PROFILES); IPR003961 (SUPERFAMILY); IPR003961 (SUPERFAMILY); TMhelix (TMHMM); TMhelix (TMHMM); TMhelix (TMHMM) |
| 674 | c23132_g1_i1_len_1012_path_2578_0_123_934_124_287_1113_288_488_1314_489_1011_1                    | 38  | zinc metalloproteinase nas-13                      | 337  | 3.99E-30  | 60.90% | 0.151   | IPR001506 (PRINTS); IPR006026 (SMART); IPR024079 (G3DSA:3.40.390.GENE3D); IPR001506 (PFAM); PTHR10127 (PANTHER); SSF55486 (SUPERFAMILY)                                                                                                                                                                                                                                                                                                                                                                                                                                                                           |
| 675 | c23132_g1_i2_len_544_path_2536_0_20_1314_2_1_543_1                                                | 11  | cre-nas-7 protein                                  | 181  | 1.02E-09  | 58.30% | 0.127   | IPR001506 (PRINTS); IPR024079 (G3DSA:3.40.390.GENE3D); IPR001506 (PFAM); PTHR10127 (PANTHER); SSF55486 (SUPERFAMILY)                                                                                                                                                                                                                                                                                                                                                                                                                                                                                              |
| 676 | c23134_g1_i1_len_2816_path_5573_0_19_2780_20_35_2796_36_89_2850_90_2815_2                         | 80  | transcriptional regulator                          | 938  | 0         | 99.60% | 0.104   | IPR002198 (PRINTS); IPR002347 (PRINTS); IPR000843 (SMART); IPR000843 (PFAM); G3DSA:3.40.50.2300 (GENE3D); IPR016040 (G3DSA:3.40.50.GENE3D); IPR001761 (PFAM); PF13561 (PFAM); G3DSA:3.40.50.2300 (GENE3D); IPR010982 (G3DSA:1.10.260.GENE3D); PTHR24322 (PANTHER); PTHR24322:SF166 (PANTHER); IPR000843 (PROSITE_PATTERNS); IPR020904 (PROSITE_PATTERNS); IPR000843 (PROSITE_PROFILES); SSF51735 (SUPERFAMILY); IPR028082 (SUPERFAMILY); IPR010982 (SUPERFAMILY)                                                                                                                                                  |

|     |                                                                                         |     |                                                    |     |           |        |         |                                                                                                                                                                                                                                                                                                                                                                                                                                                                                                                                                               |
|-----|-----------------------------------------------------------------------------------------|-----|----------------------------------------------------|-----|-----------|--------|---------|---------------------------------------------------------------------------------------------------------------------------------------------------------------------------------------------------------------------------------------------------------------------------------------------------------------------------------------------------------------------------------------------------------------------------------------------------------------------------------------------------------------------------------------------------------------|
| 677 | c23134_g1_i2_len_2801_path_5691_0_20_2796_21_74_2850_75_2800_2                          | 80  | transcriptional regulator                          | 933 | 0         | 99.50% | 0.107   | IPR002198 (PRINTS); IPR002347 (PRINTS); IPR000843 (SMART); G3DSA:3.40.50.2300 (GENE3D); G3DSA:3.40.50.2300 (GENE3D); IPR010982 (G3DSA:1.10.260.GENE3D); IPR016040 (G3DSA:3.40.50.GENE3D); IPR000843 (PFAM); PF13561 (PFAM); IPR001761 (PFAM); PTHR24322 (PANTHER); PTHR24322:SF166 (PANTHER); IPR000843 (PROSITE_PATTERNS); IPR020904 (PROSITE_PATTERNS); IPR000843 (PROSITE_PROFILES); IPR028082 (SUPERFAMILY); IPR010982 (SUPERFAMILY); SSF51735 (SUPERFAMILY)                                                                                              |
| 678 | c23151_g1_i1_len_1059_path_1_0_184_186_185_1058_2                                       | 84  | 3-hydroxyisobutyrate dehydrogenase                 | 347 | 2.17E-42  | 55.30% | 0.297   | IPR013328 (G3DSA:1.10.1040.GENE3D); IPR006115 (PFAM); IPR016040 (G3DSA:3.40.50.GENE3D); IPR029154 (PFAM); PTHR22981:SF7 (PANTHER); PTHR22981 (PANTHER); TRANSMEMBRANE (PHOBIUS); NON_CYTOPLASMIC_DOMAIN (PHOBIUS); NON_CYTOPLASMIC_DOMAIN (PHOBIUS); CYTOPLASMIC_DOMAIN (PHOBIUS); CYTOPLASMIC_DOMAIN (PHOBIUS); TRANSMEMBRANE (PHOBIUS); TRANSMEMBRANE (PHOBIUS); IPR008927 (SUPERFAMILY); SSF51735 (SUPERFAMILY)                                                                                                                                            |
| 679 | c23151_g1_i2_len_1178_path_1_0_184_2090_18_5_303_186_304_1177_1                         | 67  | 3-hydroxyisobutyrate dehydrogenase                 | 387 | 1.31E-64  | 55.10% | 0.156   | IPR006115 (PFAM); IPR013328 (G3DSA:1.10.1040.GENE3D); IPR029154 (PFAM); IPR016040 (G3DSA:3.40.50.GENE3D); PTHR22981:SF7 (PANTHER); PTHR22981 (PANTHER); IPR029752 (PROSITE_PATTERNS); SSF51735 (SUPERFAMILY); IPR008927 (SUPERFAMILY)                                                                                                                                                                                                                                                                                                                         |
| 680 | c23163_g1_i1_len_1504_path_1139_0_321_2248_322_714_1459_715_1503_2                      | 64  | #NAME?                                             | 495 | 5.42E-140 | 79.20% | 0.114   | IPR002347 (PRINTS); IPR016040 (G3DSA:3.40.50.GENE3D); PF13561 (PFAM); PTHR24315:SF2 (PANTHER); PTHR24315 (PANTHER); SSF51735 (SUPERFAMILY)                                                                                                                                                                                                                                                                                                                                                                                                                    |
| 681 | c23191_g1_i1_len_1692_path_1670_0_1453_312_4_1454_1464_3135_1465_1691_1                 | 313 | scp-like extracellular domain containing protein 1 | 558 | 6.86E-43  | 53.30% | 0.794 Y | IPR001283 (PRINTS); IPR002413 (PRINTS); IPR014044 (SMART); IPR002172 (SMART); IPR002172 (G3DSA:4.10.400.GENE3D); IPR002172 (PFAM); IPR014044 (G3DSA:3.40.33.GENE3D); IPR014044 (PFAM); IPR001283 (PANTHER); IPR023415 (PROSITE_PATTERNS); NON_CYTOPLASMIC_DOMAIN (PHOBIUS); SIGNAL_PEPTIDE (PHOBIUS); SIGNAL_PEPTIDE_C_REGION (PHOBIUS); SIGNAL_PEPTIDE_H_REGION (PHOBIUS); SIGNAL_PEPTIDE_N_REGION (PHOBIUS); IPR002172 (PROSITE_PROFILES); SignalP-TM (SIGNALP_GRAM_POSITIVE); SignalP-noTM (SIGNALP_EUK); IPR014044 (SUPERFAMILY); IPR002172 (SUPERFAMILY) |
| 682 | c23201_g1_i1_len_2340_path_2318_0_1042_481_9_1043_1052_4829_1053_2339_5                 | 63  | cyclin-c                                           | 780 | 1.16E-161 | 91.00% | 0.102   | IPR013763 (SMART); IPR006671 (PFAM); IPR013763 (G3DSA:1.10.472.GENE3D); IPR015429 (PANTHER); CYTOPLASMIC_DOMAIN (PHOBIUS); NON_CYTOPLASMIC_DOMAIN (PHOBIUS); TRANSMEMBRANE (PHOBIUS); TRANSMEMBRANE (PHOBIUS); CYTOPLASMIC_DOMAIN (PHOBIUS); NON_CYTOPLASMIC_DOMAIN (PHOBIUS); TRANSMEMBRANE (PHOBIUS); TRANSMEMBRANE (PHOBIUS); NON_CYTOPLASMIC_DOMAIN (PHOBIUS); IPR013763 (SUPERFAMILY); IPR013763 (SUPERFAMILY); TMhelix (TMHMM); TMhelix (TMHMM); TMhelix (TMHMM); TMhelix (TMHMM); TMhelix (TMHMM)                                                      |
| 683 | c23224_g1_i1_len_333_path_2957_0_332_4                                                  | 2   | ---NA---                                           | 111 |           |        | 0.142   | no IPS match                                                                                                                                                                                                                                                                                                                                                                                                                                                                                                                                                  |
| 684 | c23225_g1_i2_len_728_path_458_0_403_862_40_4_727_0                                      | 4   | dnaj homolog subfamily b member 12-like            | 243 | 1.83E-65  | 76.50% | 0.101   | IPR001623 (PRINTS); IPR001623 (SMART); IPR001623 (G3DSA:1.10.287.GENE3D); IPR001623 (PFAM); PTHR24077 (PANTHER); PTHR24077:SF239 (PANTHER); IPR018253 (PROSITE_PATTERNS); IPR001623 (PROSITE_PROFILES); IPR001623 (SUPERFAMILY)                                                                                                                                                                                                                                                                                                                               |
| 685 | c23242_g1_i1_len_1543_path_1_0_573_575_574_675_677_676_884_3294_885_1542_2              | 210 | 3-hydroxybutyrate dehydrogenase type 2             | 504 | 2.78E-43  | 76.30% | 0.116   | IPR003560 (PRINTS); IPR002198 (PFAM); IPR016040 (G3DSA:3.40.50.GENE3D); PTHR24321 (PANTHER); PTHR24321:SF3 (PANTHER); TRANSMEMBRANE (PHOBIUS); CYTOPLASMIC_DOMAIN (PHOBIUS); NON_CYTOPLASMIC_DOMAIN (PHOBIUS); SSF51735 (SUPERFAMILY)                                                                                                                                                                                                                                                                                                                         |
| 686 | c23242_g1_i2_len_1484_path_1_0_573_677_574_782_886_783_825_3294_826_1483_2              | 238 | 3-hydroxybutyrate dehydrogenase type 2             | 484 | 1.48E-94  | 75.80% | 0.116   | IPR002347 (PRINTS); IPR002198 (PRINTS); IPR002198 (PFAM); IPR016040 (G3DSA:3.40.50.GENE3D); PTHR24321:SF3 (PANTHER); PTHR24321 (PANTHER); IPR020904 (PROSITE_PATTERNS); CYTOPLASMIC_DOMAIN (PHOBIUS); TRANSMEMBRANE (PHOBIUS); NON_CYTOPLASMIC_DOMAIN (PHOBIUS); SSF51735 (SUPERFAMILY); TMhelix (TMHMM)                                                                                                                                                                                                                                                      |
| 687 | c23242_g1_i3_len_1586_path_1_0_573_575_574_675_677_676_884_886_885_927_3294_928_15_85_2 | 367 | 3-hydroxybutyrate dehydrogenase type 2             | 518 | 3.02E-118 | 81.00% | 0.116   | IPR002198 (PRINTS); IPR002347 (PRINTS); IPR002198 (PFAM); IPR016040 (G3DSA:3.40.50.GENE3D); PTHR24321:SF3 (PANTHER); PTHR24321 (PANTHER); IPR020904 (PROSITE_PATTERNS); NON_CYTOPLASMIC_DOMAIN (PHOBIUS); CYTOPLASMIC_DOMAIN (PHOBIUS); TRANSMEMBRANE (PHOBIUS); SSF51735 (SUPERFAMILY); TMhelix (TMHMM)                                                                                                                                                                                                                                                      |







|     |                                                                                                        |       |                                           |     |           |        |         |                                                                                                                                                                                                                                                                                                                                                                                                                                                                                                                                                                                                                                                                                                                                                                                                                                                           |
|-----|--------------------------------------------------------------------------------------------------------|-------|-------------------------------------------|-----|-----------|--------|---------|-----------------------------------------------------------------------------------------------------------------------------------------------------------------------------------------------------------------------------------------------------------------------------------------------------------------------------------------------------------------------------------------------------------------------------------------------------------------------------------------------------------------------------------------------------------------------------------------------------------------------------------------------------------------------------------------------------------------------------------------------------------------------------------------------------------------------------------------------------------|
| 700 | c23656_g2_i2_len_1236_path_1920_0_460_2380_461_554_1458_555_809_1168_810_1235_3                        | 14    | gastrula zinc finger                      | 412 | 2.78E-60  | 54.90% | 0.11    | IPR015880 (SMART); PF13894 (PFAM); IPR013087 (G3DSA:3.30.160.GENE3D); IPR007087 (PFAM); PF13465 (PFAM); IPR013087 (G3DSA:3.30.160.GENE3D); IPR013087 (G3DSA:3.30.160.GENE3D); PTHR24409:SF14 (PANTHER); PTHR24409 (PANTHER); IPR007087 (PROSITE_PATTERNS); IPR007087 (PROSITE_PROFILES); SSF57667 (SUPERFAMILY); SSF57667 (SUPERFAMILY); SSF57667 (SUPERFAMILY); SSF57667 (SUPERFAMILY) |
| 701 | c23690_g1_i1_len_2193_path_2116_0_1431_465_5_1432_1570_3630_1571_2192_2                                | 21998 | disulfide isomerase                       | 723 | 0         | 80.20% | 0.545 Y | PR00421 (PRINTS); IPR005792 (TIGRFAM); IPR005788 (TIGRFAM); PF13848 (PFAM); IPR012336 (G3DSA:3.40.30.GENE3D); IPR013766 (PFAM); IPR012336 (G3DSA:3.40.30.GENE3D); PTHR18929:SF48 (PANTHER); PTHR18929 (PANTHER); IPR017937 (PROSITE_PATTERNS); IPR017937 (PROSITE_PATTERNS); SIGNAL_PEPTIDE_H_REGION (PHOBIUS); SIGNAL_PEPTIDE_N_REGION (PHOBIUS); SIGNAL_PEPTIDE_C_REGION (PHOBIUS); SIGNAL_PEPTIDE (PHOBIUS); NON_CYTOPLASMIC_DOMAIN (PHOBIUS); IPR012336 (PROSITE_PROFILES); IPR012336 (PROSITE_PROFILES); SignalP-noTM (SIGNALP_EUK); IPR012336 (SUPERFAMILY); IPR012336 (SUPERFAMILY); IPR012336 (SUPERFAMILY); IPR012336 (SUPERFAMILY)                                                                                                                                                                                                              |
| 702 | c23690_g1_i2_len_2136_path_2116_0_1431_354_8_1432_1513_3630_1514_2135_2                                | 29327 | protein disulfide-isomerase               | 704 | 0         | 80.70% | 0.545 Y | PR00421 (PRINTS); PF13848 (PFAM); IPR012336 (G3DSA:3.40.30.GENE3D); IPR013766 (PFAM); IPR005788 (TIGRFAM); IPR005792 (TIGRFAM); IPR012336 (G3DSA:3.40.30.GENE3D); PTHR18929:SF48 (PANTHER); PTHR18929 (PANTHER); IPR017937 (PROSITE_PATTERNS); IPR017937 (PROSITE_PATTERNS); SIGNAL_PEPTIDE_H_REGION (PHOBIUS); NON_CYTOPLASMIC_DOMAIN (PHOBIUS); SIGNAL_PEPTIDE (PHOBIUS); SIGNAL_PEPTIDE_N_REGION (PHOBIUS); SIGNAL_PEPTIDE_C_REGION (PHOBIUS); IPR012336 (PROSITE_PROFILES); IPR012336 (PROSITE_PROFILES); SignalP-noTM (SIGNALP_EUK); IPR012336 (SUPERFAMILY); IPR012336 (SUPERFAMILY); IPR012336 (SUPERFAMILY); IPR012336 (SUPERFAMILY)                                                                                                                                                                                                              |
| 703 | c23749_g1_i1_len_1583_path_1712_0_963_3177_964_1382_258_1383_1408_3199_1409_1469_2_58_1470_1495_3199_1 | 80    | zinc finger protein 84-like               | 528 | 4.66E-41  | 48.70% | 0.109   | IPR015880 (SMART); IPR013087 (G3DSA:3.30.160.GENE3D); IPR013087 (G3DSA:3.30.160.GENE3D); PF13465 (PFAM); PF13894 (PFAM); IPR013087 (G3DSA:3.30.160.GENE3D); PTHR24409 (PANTHER); IPR007087 (PROSITE_PATTERNS); IPR007087 (PROSITE_PROFILES); IPR007087 (PROSITE_PROFILES); IPR007087 (PROSITE_PROFILES); IPR007087 (PROSITE_PROFILES); IPR007087 (PROSITE_PROFILES); IPR007087 (PROSITE_PROFILES); SSF57667 (SUPERFAMILY); SSF57667 (SUPERFAMILY); SSF57667 (SUPERFAMILY); SSF57667 (SUPERFAMILY)                                                                                                                                       |
| 704 | c23780_g1_i1_len_1184_path_1164_0_102_1267__103_625_1790_626_787_1952_788_966_2133_967_1183_2          | 53    | peroxisomal trans-2-enoyl- reductase-like | 388 | 1.13E-127 | 74.60% | 0.131   | IPR002347 (PRINTS); PF13561 (PFAM); IPR016040 (G3DSA:3.40.50.GENE3D); PTHR24317 (PANTHER); SSF51735 (SUPERFAMILY)                                                                                                                                                                                                                                                                                                                                                                                                                                                                                                                                                                                                                                                                                                                                         |
| 705 | c23780_g1_i2_len_953_path_2367_0_31_1267__32_554_1952_555_733_2131_734_735_2133_73_6_952_0             | 26    | peroxisomal trans-2-enoyl- reductase-like | 312 | 3.11E-91  | 61.20% | 0.177   | IPR002347 (PRINTS); IPR002198 (PFAM); IPR016040 (G3DSA:3.40.50.GENE3D); PTHR24317 (PANTHER); SSF51735 (SUPERFAMILY); TMhelix (TMHMM); TMhelix (TMHMM)                                                                                                                                                                                                                                                                                                                                                                                                                                                                                                                                                                                                                                                                                                     |
| 706 | c23780_g1_i3_len_1115_path_2367_0_31_1267__32_554_1790_555_716_1952_717_895_2131_8_96_897_2133_898_0   | 54    | peroxisomal trans-2-enoyl- reductase-like | 366 | 1.36E-126 | 74.10% | 0.177   | IPR002347 (PRINTS); IPR016040 (G3DSA:3.40.50.GENE3D); PF13561 (PFAM); PTHR24317 (PANTHER); SSF51735 (SUPERFAMILY)                                                                                                                                                                                                                                                                                                                                                                                                                                                                                                                                                                                                                                                                                                                                         |

|     |                                                                                                    |      |                                               |     |           |        |       |                                                                                                                                                                                                                                                                                                                                                                                                                                                                                                                                                                                                |
|-----|----------------------------------------------------------------------------------------------------|------|-----------------------------------------------|-----|-----------|--------|-------|------------------------------------------------------------------------------------------------------------------------------------------------------------------------------------------------------------------------------------------------------------------------------------------------------------------------------------------------------------------------------------------------------------------------------------------------------------------------------------------------------------------------------------------------------------------------------------------------|
| 707 | c23838_g1_i2_len_1501_path_1479_0_385_1865_386_1500_4                                              | 74   | matrix metalloproteinase-9                    | 500 | 5.40E-10  | 41.30% | 0.126 | IPR000562 (SMART); IPR000562 (G3DSA:2.10.10.GENE3D); IPR000562 (PFAM); IPR000562 (G3DSA:2.10.10.GENE3D); NON_CYTOPLASMIC_DOMAIN (PHOBIUS); TRANSMEMBRANE (PHOBIUS); CYTOPLASMIC_DOMAIN (PHOBIUS); IPR000562 (PROSITE_PROFILES); IPR000562 (PROSITE_PROFILES); IPR000562 (PROSITE_PROFILES); IPR013806 (SUPERFAMILY); IPR013806 (SUPERFAMILY); IPR013806 (SUPERFAMILY); TMhelix (TMHMM)                                                                                                                                                                                                         |
| 708 | c23851_g1_i2_len_1323_path_1_0_560_3074_561_562_564_563_805_809_806_1322_3                         | 35   | fibroblast growth factor receptor-like 1      | 441 | 1.16E-27  | 63.60% | 0.106 | IPR003598 (SMART); IPR003599 (SMART); IPR013098 (PFAM); IPR013783 (G3DSA:2.60.40.GENE3D); PTHR19890 (PANTHER); PTHR19890:SF5 (PANTHER); TRANSMEMBRANE (PHOBIUS); NON_CYTOPLASMIC_DOMAIN (PHOBIUS); CYTOPLASMIC_DOMAIN (PHOBIUS); CYTOPLASMIC_DOMAIN (PHOBIUS); TRANSMEMBRANE (PHOBIUS); NON_CYTOPLASMIC_DOMAIN (PHOBIUS); TRANSMEMBRANE (PHOBIUS); TRANSMEMBRANE (PHOBIUS); TRANSMEMBRANE (PHOBIUS); NON_CYTOPLASMIC_DOMAIN (PHOBIUS); CYTOPLASMIC_DOMAIN (PHOBIUS); IPR007110 (PROSITE_PROFILES); SSF48726 (SUPERFAMILY); TMhelix (TMHMM); TMhelix (TMHMM); TMhelix (TMHMM)                   |
| 709 | c23852_g1_i1_len_1428_path_1568_0_1054_262_2_1055_1078_49_1079_1079_116_1080_1094_1_32_1095_1427_1 | 2204 | uncharacterized oxidoreductase                | 470 | 1.07E-84  | 69.80% | 0.133 | IPR002198 (PRINTS); IPR002347 (PRINTS); IPR016040 (G3DSA:3.40.50.GENE3D); IPR002198 (PFAM); PTHR24322 (PANTHER); PTHR24322:SF237 (PANTHER); TRANSMEMBRANE (PHOBIUS); CYTOPLASMIC_DOMAIN (PHOBIUS); NON_CYTOPLASMIC_DOMAIN (PHOBIUS); SSF51735 (SUPERFAMILY); TMhelix (TMHMM)                                                                                                                                                                                                                                                                                                                   |
| 710 | c23854_g1_i1_len_868_path_959_0_82_116_83_867_0                                                    | 424  | histone h2a-like                              | 284 | 3.43E-79  | 96.80% | 0.214 | IPR002119 (PRINTS); IPR002119 (SMART); IPR007125 (PFAM); IPR009072 (G3DSA:1.10.20.GENE3D); PTHR23430:SF45 (PANTHER); PTHR23430 (PANTHER); IPR002119 (PROSITE_PATTERNS); TRANSMEMBRANE (PHOBIUS); CYTOPLASMIC_DOMAIN (PHOBIUS); NON_CYTOPLASMIC_DOMAIN (PHOBIUS); IPR009072 (SUPERFAMILY); TMhelix (TMHMM)                                                                                                                                                                                                                                                                                      |
| 711 | c23863_g1_i2_len_1016_path_994_0_122_1117_123_285_1280_286_289_1284_290_375_1370_3_76_1015_2       | 137  | l-xylulose reductase                          | 332 | 3.60E-114 | 78.00% | 0.119 | IPR002198 (PRINTS); IPR002347 (PRINTS); IPR013968 (SMART); IPR016040 (G3DSA:3.40.50.GENE3D); PF13561 (PFAM); PTHR24311:SF6 (PANTHER); PTHR24311 (PANTHER); IPR020904 (PROSITE_PATTERNS); SSF51735 (SUPERFAMILY)                                                                                                                                                                                                                                                                                                                                                                                |
| 712 | c23896_g1_i1_len_1656_path_1734_0_1655_2                                                           | 788  | er membrane protein complex subunit 10        | 540 | 6.85E-72  | 63.70% | 0.276 | PTHR21397 (PANTHER); IPR029615 (PTHR21397:PANTHER); TRANSMEMBRANE (PHOBIUS); TRANSMEMBRANE (PHOBIUS); TRANSMEMBRANE (PHOBIUS); TRANSMEMBRANE (PHOBIUS); CYTOPLASMIC_DOMAIN (PHOBIUS); CYTOPLASMIC_DOMAIN (PHOBIUS); CYTOPLASMIC_DOMAIN (PHOBIUS); TRANSMEMBRANE (PHOBIUS); TRANSMEMBRANE (PHOBIUS); TRANSMEMBRANE (PHOBIUS); NON_CYTOPLASMIC_DOMAIN (PHOBIUS); NON_CYTOPLASMIC_DOMAIN (PHOBIUS); TRANSMEMBRANE (PHOBIUS); NON_CYTOPLASMIC_DOMAIN (PHOBIUS); NON_CYTOPLASMIC_DOMAIN (PHOBIUS); CYTOPLASMIC_DOMAIN (PHOBIUS); TMhelix (TMHMM); TMhelix (TMHMM); TMhelix (TMHMM); TMhelix (TMHMM) |
| 713 | c23915_g1_i1_len_2340_path_53_0_2339_5                                                             | 941  | multiple inositol polyphosphate phosphatase 1 | 780 | 4.59E-142 | 61.20% | 0.304 | IPR029033 (G3DSA:3.40.50.GENE3D); IPR000560 (PFAM); PTHR20963:SF8 (PANTHER); PTHR20963 (PANTHER); IPR000560 (PROSITE_PATTERNS); TRANSMEMBRANE (PHOBIUS); NON_CYTOPLASMIC_DOMAIN (PHOBIUS); TRANSMEMBRANE (PHOBIUS); CYTOPLASMIC_DOMAIN (PHOBIUS); NON_CYTOPLASMIC_DOMAIN (PHOBIUS); CYTOPLASMIC_DOMAIN (PHOBIUS); TRANSMEMBRANE (PHOBIUS); TRANSMEMBRANE (PHOBIUS); TRANSMEMBRANE (PHOBIUS); NON_CYTOPLASMIC_DOMAIN (PHOBIUS); CYTOPLASMIC_DOMAIN (PHOBIUS); IPR029033 (SUPERFAMILY); TMhelix (TMHMM)                                                                                          |
| 714 | c2392_g2_i1_len_486_path_647_0_485_2                                                               | 4    | PREDICTED: hypothetical protein LOC100647042  | 162 | 1.14E-17  | 52.70% | 0.245 | IPR001314 (PRINTS); IPR001254 (SMART); G3DSA:2.40.10.10 (GENE3D); G3DSA:2.40.10.10 (GENE3D); IPR001254 (PFAM); PTHR24258 (PANTHER); PTHR24258:SF96 (PANTHER); IPR018114 (PROSITE_PATTERNS); IPR001254 (PROSITE_PROFILES); IPR009003 (SUPERFAMILY)                                                                                                                                                                                                                                                                                                                                              |









|     |                                                                                 |       |                                                  |     |           |        |         |                                                                                                                                                                                                                                                                                                                                                                                                                                                                                                                                                                                                                                                                                                  |
|-----|---------------------------------------------------------------------------------|-------|--------------------------------------------------|-----|-----------|--------|---------|--------------------------------------------------------------------------------------------------------------------------------------------------------------------------------------------------------------------------------------------------------------------------------------------------------------------------------------------------------------------------------------------------------------------------------------------------------------------------------------------------------------------------------------------------------------------------------------------------------------------------------------------------------------------------------------------------|
| 744 | c24483_g1_i1_len_1391_path_1_0_1390_2                                           | 1973  | hemagglutinin amebocyte aggregation factor-like  | 457 | 2.12E-40  | 61.10% | 0.224   | PF14704 (PFAM); IPR026645 (PANTHER); NON_CYTOPLASMIC_DOMAIN (PHOBIUS); CYTOPLASMIC_DOMAIN (PHOBIUS); TRANSMEMBRANE (PHOBIUS); TRANSMEMBRANE (PHOBIUS); NON_CYTOPLASMIC_DOMAIN (PHOBIUS); TMhelix (TMHMM); TMhelix (TMHMM)                                                                                                                                                                                                                                                                                                                                                                                                                                                                        |
| 745 | c24508_g1_i1_len_1396_path_1374_0_549_1924_550_1142_2517_1143_1395_0            | 65    | gastrula zinc finger                             | 466 | 2.16E-49  | 57.90% | 0.104   | IPR015880 (SMART); IPR013087 (G3DSA:3.30.160.GENE3D); PF13912 (PFAM); IPR013087 (G3DSA:3.30.160.GENE3D); IPR013087 (G3DSA:3.30.160.GENE3D); PF13465 (PFAM); IPR013087 (G3DSA:3.30.160.GENE3D); PTHR24409 (PANTHER); IPR007087 (PROSITE_PATTERNS); IPR007087 (PROSITE_PATTERNS); IPR007087 (PROSITE_PATTERNS); IPR007087 (PROSITE_PATTERNS); IPR007087 (PROSITE_PATTERNS); IPR007087 (PROSITE_PROFILES); SSF57667 (SUPERFAMILY); SSF57667 (SUPERFAMILY); SSF57667 (SUPERFAMILY) |
| 746 | c24508_g1_i2_len_701_path_2747_0_107_1924_108_700_2                             | 17    | gastrula zinc finger protein - partial           | 233 | 3.55E-32  | 65.00% | 0.197   | IPR015880 (SMART); IPR013087 (G3DSA:3.30.160.GENE3D); PF13465 (PFAM); IPR013087 (G3DSA:3.30.160.GENE3D); IPR007087 (PROSITE_PATTERNS); IPR007087 (PROSITE_PATTERNS); IPR007087 (PROSITE_PATTERNS); IPR007087 (PROSITE_PATTERNS); IPR007087 (PROSITE_PROFILES); IPR007087 (PROSITE_PROFILES); IPR007087 (PROSITE_PROFILES); IPR007087 (PROSITE_PROFILES); SSF57667 (SUPERFAMILY); SSF57667 (SUPERFAMILY)                                                                                                                                                                                                                                                                                          |
| 747 | c24519_g2_i1_len_1225_path_3545_0_563_4107_564_564_4108_565_1224_2              | 115   | ankyrin repeat domain-containing protein 16-like | 408 | 2.23E-112 | 63.60% | 0.104   | IPR002110 (PRINTS); IPR002110 (SMART); IPR020683 (PFAM); IPR020683 (G3DSA:1.25.40.GENE3D); PTHR24181 (PANTHER); PTHR24181:SF20 (PANTHER); IPR002110 (PROSITE_PROFILES); IPR020683 (PROSITE_PROFILES); IPR002110 (PROSITE_PROFILES); IPR002110 (PROSITE_PROFILES); IPR002110 (PROSITE_PROFILES); IPR002110 (PROSITE_PROFILES); IPR002110 (PROSITE_PROFILES); IPR020683 (SUPERFAMILY)                                                                                                                                                                                                                                                                                                              |
| 748 | c24553_g2_i1_len_2142_path_1_0_14_16_15_21_41_1                                 | 186   | n-sulphoglucosamine partial                      | 714 | 0         | 78.30% | 0.752 Y | Coil (COILS); G3DSA:3.30.1120.10 (GENE3D); IPR017849 (G3DSA:3.40.720.GENE3D); IPR000917 (PFAM); PTHR10342:SF76 (PANTHER); PTHR10342 (PANTHER); IPR024607 (PROSITE_PATTERNS); TRANSMEMBRANE (PHOBIUS); CYTOPLASMIC_DOMAIN (PHOBIUS); TRANSMEMBRANE (PHOBIUS); CYTOPLASMIC_DOMAIN (PHOBIUS); TRANSMEMBRANE (PHOBIUS); TRANSMEMBRANE (PHOBIUS); TRANSMEMBRANE (PHOBIUS); NON_CYTOPLASMIC_DOMAIN (PHOBIUS); NON_CYTOPLASMIC_DOMAIN (PHOBIUS); CYTOPLASMIC_DOMAIN (PHOBIUS); SignalP-noTM (SIGNALP_EUK); IPR017850 (SUPERFAMILY)                                                                                                                                                                      |
| 749 | c24553_g2_i2_len_2484_path_5120_0_356_16_3_57_2483_1                            | 188   | n-sulphoglucosamine partial                      | 828 | 0         | 78.30% | 0.134   | Coil (COILS); IPR000917 (PFAM); IPR017849 (G3DSA:3.40.720.GENE3D); G3DSA:3.30.1120.10 (GENE3D); PTHR10342 (PANTHER); PTHR10342:SF76 (PANTHER); IPR024607 (PROSITE_PATTERNS); CYTOPLASMIC_DOMAIN (PHOBIUS); CYTOPLASMIC_DOMAIN (PHOBIUS); NON_CYTOPLASMIC_DOMAIN (PHOBIUS); TRANSMEMBRANE (PHOBIUS); NON_CYTOPLASMIC_DOMAIN (PHOBIUS); TRANSMEMBRANE (PHOBIUS); NON_CYTOPLASMIC_DOMAIN (PHOBIUS); TRANSMEMBRANE (PHOBIUS); TRANSMEMBRANE (PHOBIUS); TRANSMEMBRANE (PHOBIUS); CYTOPLASMIC_DOMAIN (PHOBIUS); IPR017850 (SUPERFAMILY)                                                                                                                                                                |
| 750 | c24558_g1_i1_len_1322_path_480_0_753_1234_754_775_1256_776_1076_422_1077_1321_2 | 12025 | granulins- partial                               | 434 | 3.89E-38  | 51.30% | 0.292   | IPR000118 (SMART); IPR000118 (PFAM); PTHR12274:SF1 (PANTHER); PTHR12274 (PANTHER); IPR000118 (PROSITE_PATTERNS); IPR000118 (PROSITE_PATTERNS); TRANSMEMBRANE (PHOBIUS); TRANSMEMBRANE (PHOBIUS); NON_CYTOPLASMIC_DOMAIN (PHOBIUS); TRANSMEMBRANE (PHOBIUS); NON_CYTOPLASMIC_DOMAIN (PHOBIUS); TRANSMEMBRANE (PHOBIUS); CYTOPLASMIC_DOMAIN (PHOBIUS); CYTOPLASMIC_DOMAIN (PHOBIUS); SSF57277 (SUPERFAMILY)                                                                                                                                                                                                                                                                                        |

|     |                                                                                                       |      |                                                        |     |          |        |         |                                                                                                                                                                                                                                                                                                                                                                                                                                                                                                                                                                                                                                         |
|-----|-------------------------------------------------------------------------------------------------------|------|--------------------------------------------------------|-----|----------|--------|---------|-----------------------------------------------------------------------------------------------------------------------------------------------------------------------------------------------------------------------------------------------------------------------------------------------------------------------------------------------------------------------------------------------------------------------------------------------------------------------------------------------------------------------------------------------------------------------------------------------------------------------------------------|
| 751 | c24558_g1_i2_len_1503_path_480_0_753_1234_754_775_1256_776_1076_241_1077_1257_422_1258_1502_2         | 8528 | granulins- partial                                     | 494 | 1.07E-37 | 51.20% | 0.292   | IPR000118 (SMART); IPR000118 (PFAM); PTHR12274:SF1 (PANTHER); PTHR12274 (PANTHER); IPR000118 (PROSITE_PATTERNS); IPR000118 (PROSITE_PATTERNS); TRANSMEMBRANE (PHOBIUS); NON_CYTOPLASMIC_DOMAIN (PHOBIUS); TRANSMEMBRANE (PHOBIUS); CYTOPLASMIC_DOMAIN (PHOBIUS); CYTOPLASMIC_DOMAIN (PHOBIUS); NON_CYTOPLASMIC_DOMAIN (PHOBIUS); TRANSMEMBRANE (PHOBIUS); SSF57277 (SUPERFAMILY); TMhelix (TMHMM); TMhelix (TMHMM); TMhelix (TMHMM)                                                                                                                                                                                                     |
| 752 | c24586_g1_i1_len_1956_path_2034_0_1955_3                                                              | 1601 | cytosolic non-specific dipeptidase                     | 646 | 0        | 81.50% | 0.453 Y | G3DSA:3.40.630.10 (GENE3D); IPR002933 (PFAM); IPR011650 (PFAM); IPR011650 (G3DSA:3.30.70.GENE3D); PTHR11014:SF51 (PANTHER); PTHR11014 (PANTHER); IPR001261 (PROSITE_PATTERNS); CYTOPLASMIC_DOMAIN (PHOBIUS); TRANSMEMBRANE (PHOBIUS); NON_CYTOPLASMIC_DOMAIN (PHOBIUS); SSF53187 (SUPERFAMILY); TMhelix (TMHMM)                                                                                                                                                                                                                                                                                                                         |
| 753 | c24588_g1_i2_len_921_path_79_0_663_67_664_702_67_703_741_1460_742_764_1483_765_803_1483_804_842_148_0 | 11   | ---NA---                                               | 307 |          |        | 0.131   | CYTOPLASMIC_DOMAIN (PHOBIUS); NON_CYTOPLASMIC_DOMAIN (PHOBIUS); TRANSMEMBRANE (PHOBIUS); TMhelix (TMHMM); TMhelix (TMHMM)                                                                                                                                                                                                                                                                                                                                                                                                                                                                                                               |
| 754 | c24591_g1_i1_len_1125_path_2367_0_35_211_3_6_1124_1                                                   | 37   | zinc finger protein partial                            | 370 | 6.11E-15 | 64.00% | 0.103   | IPR015880 (SMART); IPR013087 (G3DSA:3.30.160.GENE3D); IPR013087 (G3DSA:3.30.160.GENE3D); IPR007087 (PFAM); PF13894 (PFAM); PTHR24409 (PANTHER); IPR007087 (PROSITE_PATTERNS); IPR007087 (PROSITE_PATTERNS); TRANSMEMBRANE (PHOBIUS); NON_CYTOPLASMIC_DOMAIN (PHOBIUS); TRANSMEMBRANE (PHOBIUS); CYTOPLASMIC_DOMAIN (PHOBIUS); TRANSMEMBRANE (PHOBIUS); TRANSMEMBRANE (PHOBIUS); CYTOPLASMIC_DOMAIN (PHOBIUS); NON_CYTOPLASMIC_DOMAIN (PHOBIUS); CYTOPLASMIC_DOMAIN (PHOBIUS); IPR007087 (PROSITE_PROFILES); IPR007087 (PROSITE_PROFILES); IPR007087 (PROSITE_PROFILES); SSF57667 (SUPERFAMILY); SSF57667 (SUPERFAMILY); TMhelix (TMHMM) |
| 755 | c24591_g2_i1_len_262_path_2367_0_35_2402_3_6_261_1                                                    | 0    | zinc finger protein 358                                | 87  | 4.11E-15 | 64.80% | 0.124   | IPR015880 (SMART); PF13913 (PFAM); IPR013087 (G3DSA:3.30.160.GENE3D); IPR007087 (PFAM); IPR013087 (G3DSA:3.30.160.GENE3D); PF13465 (PFAM); IPR013087 (G3DSA:3.30.160.GENE3D); PTHR24409:SF14 (PANTHER); PTHR24409 (PANTHER); IPR007087 (PROSITE_PATTERNS); IPR007087 (PROSITE_PATTERNS); IPR007087 (PROSITE_PATTERNS); IPR007087 (PROSITE_PROFILES); IPR007087 (PROSITE_PROFILES); IPR007087 (PROSITE_PROFILES); SSF57667 (SUPERFAMILY); SSF57667 (SUPERFAMILY)                                                                                                                                                                         |
| 756 | c24591_g3_i1_len_723_path_2662_0_249_2911_250_255_186_256_300_2960_301_337_124_338_722_2              | 12   | zinc finger protein 358                                | 241 | 4.84E-24 | 59.00% | 0.12    | IPR015880 (SMART); IPR013087 (G3DSA:3.30.160.GENE3D); IPR013087 (G3DSA:3.30.160.GENE3D); PF13894 (PFAM); PF13465 (PFAM); PTHR24409 (PANTHER); PTHR24409:SF13 (PANTHER); IPR007087 (PROSITE_PATTERNS); IPR007087 (PROSITE_PATTERNS); IPR007087 (PROSITE_PATTERNS); IPR007087 (PROSITE_PROFILES); IPR007087 (PROSITE_PROFILES); IPR007087 (PROSITE_PROFILES); IPR007087 (PROSITE_PROFILES); SSF57667 (SUPERFAMILY); SSF57667 (SUPERFAMILY)                                                                                                                                                                                                |
| 757 | c24597_g1_i1_len_1560_path_1622_0_1161_278_3_1162_1162_70_1163_1559_0                                 | 75   | sh3 domain-containing ring finger protein 3 isoform x1 | 520 | 2.70E-68 | 52.70% | 0.116   | IPR001452 (SMART); G3DSA:2.30.30.40 (GENE3D); IPR001452 (PFAM); PTHR10661 (PANTHER); PTHR10661:SF7 (PANTHER); NON_CYTOPLASMIC_DOMAIN (PHOBIUS); TRANSMEMBRANE (PHOBIUS); CYTOPLASMIC_DOMAIN (PHOBIUS); IPR001452 (PROSITE_PROFILES); IPR001452 (SUPERFAMILY); TMhelix (TMHMM)                                                                                                                                                                                                                                                                                                                                                           |
| 758 | c24622_g1_i1_len_1600_path_1704_0_715_14_7_16_1599_2                                                  | 90   | uv radiation resistance-associated gene protein        | 533 | 1.52E-39 | 66.30% | 0.097   | Coil (COILS); PTHR15157 (PANTHER); NON_CYTOPLASMIC_DOMAIN (PHOBIUS); TRANSMEMBRANE (PHOBIUS); CYTOPLASMIC_DOMAIN (PHOBIUS); TMhelix (TMHMM)                                                                                                                                                                                                                                                                                                                                                                                                                                                                                             |
| 759 | c24687_g1_i1_len_1589_path_53_0_1588_0                                                                | 87   | ---NA---                                               | 530 |          |        | 0.112   | TRANSMEMBRANE (PHOBIUS); CYTOPLASMIC_DOMAIN (PHOBIUS); CYTOPLASMIC_DOMAIN (PHOBIUS); NON_CYTOPLASMIC_DOMAIN (PHOBIUS); NON_CYTOPLASMIC_DOMAIN (PHOBIUS); TRANSMEMBRANE (PHOBIUS); TRANSMEMBRANE (PHOBIUS)                                                                                                                                                                                                                                                                                                                                                                                                                               |
| 760 | c24687_g1_i1_len_1589_path_53_0_1588_1                                                                | 87   | cation channel sperm-associated protein subunit gamma  | 530 | 2.54E-07 | 56.00% | 0.107   | Coil (COILS); TRANSMEMBRANE (PHOBIUS); CYTOPLASMIC_DOMAIN (PHOBIUS); NON_CYTOPLASMIC_DOMAIN (PHOBIUS); TMhelix (TMHMM)                                                                                                                                                                                                                                                                                                                                                                                                                                                                                                                  |

|     |                                                                                                       |     |                                                       |     |           |        |       |                                                                                                                                                                                                                                                                                                                                                                                                                                                                                                                                                                                                         |
|-----|-------------------------------------------------------------------------------------------------------|-----|-------------------------------------------------------|-----|-----------|--------|-------|---------------------------------------------------------------------------------------------------------------------------------------------------------------------------------------------------------------------------------------------------------------------------------------------------------------------------------------------------------------------------------------------------------------------------------------------------------------------------------------------------------------------------------------------------------------------------------------------------------|
| 761 | c24687_g1_i1_len_1589_path_53_0_1588_2                                                                | 87  | cation channel sperm-associated protein subunit gamma | 529 | 6.71E-06  | 54.00% | 0.111 | CYTOPLASMIC_DOMAIN (PHOBIUS); TRANSMEMBRANE (PHOBIUS); TRANSMEMBRANE (PHOBIUS); TRANSMEMBRANE (PHOBIUS); CYTOPLASMIC_DOMAIN (PHOBIUS); TRANSMEMBRANE (PHOBIUS); NON_CYTOPLASMIC_DOMAIN (PHOBIUS); NON_CYTOPLASMIC_DOMAIN (PHOBIUS); NON_CYTOPLASMIC_DOMAIN (PHOBIUS); TMhelix (TMHMM); TMhelix (TMHMM); TMhelix (TMHMM)                                                                                                                                                                                                                                                                                 |
| 762 | c24707_g1_i1_len_1795_path_105_0_1794_5                                                               | 101 | peroxisomal biogenesis factor 7                       | 598 | 3.80E-143 | 73.00% | 0.161 | IPR020472 (PRINTS); IPR001680 (SMART); IPR001680 (PFAM); IPR015943 (G3DSA:2.130.10.GENE3D); PTHR22850 (PANTHER); PTHR22850:SF98 (PANTHER); IPR019775 (PROSITE_PATTERNS); IPR019775 (PROSITE_PATTERNS); IPR019775 (PROSITE_PATTERNS); TRANSMEMBRANE (PHOBIUS); CYTOPLASMIC_DOMAIN (PHOBIUS); TRANSMEMBRANE (PHOBIUS); NON_CYTOPLASMIC_DOMAIN (PHOBIUS); NON_CYTOPLASMIC_DOMAIN (PHOBIUS); IPR001680 (PROSITE_PROFILES); IPR001680 (PROSITE_PROFILES); IPR017986 (PROSITE_PROFILES); IPR001680 (PROSITE_PROFILES); IPR01680 (PROSITE_PROFILES); IPR017986 (SUPERFAMILY); TMhelix (TMHMM); TMhelix (TMHMM) |
| 763 | c24738_g1_i1_len_1594_path_738_0_475_5831_476_477_763_478_1098_1384_1099_1103_1389_1104_1496_1782_1_0 | 54  | protein d2-like isoform x2                            | 524 | 2.83E-89  | 79.20% | 0.33  | IPR008914 (PFAM); IPR008914 (G3DSA:3.90.280.GENE3D); PTHR11362 (PANTHER); CYTOPLASMIC_DOMAIN (PHOBIUS); NON_CYTOPLASMIC_DOMAIN (PHOBIUS); TRANSMEMBRANE (PHOBIUS); CYTOPLASMIC_DOMAIN (PHOBIUS); TRANSMEMBRANE (PHOBIUS); IPR008914 (SUPERFAMILY); TMhelix (TMHMM)                                                                                                                                                                                                                                                                                                                                      |
| 764 | c24738_g1_i2_len_1066_path_738_0_475_5831_476_477_5064_478_1065_0                                     | 67  | protein d2-like isoform x1                            | 356 | 1.75E-63  | 75.50% | 0.33  | IPR008914 (PFAM); IPR008914 (G3DSA:3.90.280.GENE3D); PTHR11362 (PANTHER); IPR008914 (SUPERFAMILY)                                                                                                                                                                                                                                                                                                                                                                                                                                                                                                       |
| 765 | c24738_g1_i3_len_916_path_4492_0_94_738_95_570_25_571_915_2                                           | 51  | phosphatidylethanolamine-binding protein              | 299 | 6.22E-64  | 78.50% | 0.118 | IPR008914 (G3DSA:3.90.280.GENE3D); IPR008914 (PFAM); PTHR11362 (PANTHER); IPR008914 (SUPERFAMILY)                                                                                                                                                                                                                                                                                                                                                                                                                                                                                                       |
| 766 | c24782_g2_i1_len_2510_path_433_0_952_1386_953_954_1388_955_1930_2364_1931_2509_2                      | 370 | proclotting enzyme                                    | 821 | 1.15E-129 | 64.00% | 0.214 | IPR001314 (PRINTS); IPR006604 (SMART); IPR001254 (SMART); G3DSA:2.40.10.10 (GENE3D); G3DSA:2.40.10.10 (GENE3D); IPR001254 (PFAM); PTHR24268:SF81 (PANTHER); PTHR24268 (PANTHER); IPR018114 (PROSITE_PATTERNS); IPR018114 (PROSITE_PATTERNS); TRANSMEMBRANE (PHOBIUS); TRANSMEMBRANE (PHOBIUS); NON_CYTOPLASMIC_DOMAIN (PHOBIUS); TRANSMEMBRANE (PHOBIUS); NON_CYTOPLASMIC_DOMAIN (PHOBIUS); CYTOPLASMIC_DOMAIN (PHOBIUS); CYTOPLASMIC_DOMAIN (PHOBIUS); IPR001254 (PROSITE_PROFILES); IPR009003 (SUPERFAMILY); TMhelix (TMHMM); TMhelix (TMHMM)                                                         |
| 767 | c24808_g1_i1_len_863_path_55_0_668_886_669_862_5                                                      | 278 | peptidyl-prolyl cis-trans isomerase-like 3-like       | 287 | 3.45E-48  | 59.70% | 0.144 | IPR029000 (G3DSA:2.40.100.GENE3D); IPR002130 (PFAM); IPR024936 (PANTHER); IPR002130 (PROSITE_PROFILES); IPR029000 (SUPERFAMILY)                                                                                                                                                                                                                                                                                                                                                                                                                                                                         |
| 768 | c24808_g1_i2_len_1025_path_55_0_668_724_669_830_886_831_1024_5                                        | 673 | peptidyl-prolyl cis-trans isomerase-like 3            | 341 | 1.27E-96  | 91.00% | 0.145 | IPR002130 (PRINTS); IPR002130 (PFAM); IPR029000 (G3DSA:2.40.100.GENE3D); IPR024936 (PANTHER); IPR020892 (PROSITE_PATTERNS); IPR002130 (PROSITE_PROFILES); IPR029000 (SUPERFAMILY)                                                                                                                                                                                                                                                                                                                                                                                                                       |
| 769 | c24834_g1_i1_len_1967_path_1_0_1919_1921_1_920_1938_4097_1939_1966_1                                  | 244 | coatomer subunit alpha                                | 648 | 0         | 81.70% | 0.115 | IPR010714 (PFAM); IPR006692 (PFAM); PTHR19876 (PANTHER)                                                                                                                                                                                                                                                                                                                                                                                                                                                                                                                                                 |
| 770 | c24933_g1_i2_len_1751_path_849_0_25_976_26_1054_2005_1055_1750_1                                      | 56  | coagulation factor xi                                 | 584 | 1.69E-61  | 61.80% | 0.121 | IPR001314 (PRINTS); IPR001254 (SMART); G3DSA:2.40.10.10 (GENE3D); G3DSA:2.40.10.10 (GENE3D); G3DSA:2.40.10.10 (GENE3D); IPR001254 (PFAM); PTHR24256 (PANTHER); IPR018114 (PROSITE_PATTERNS); IPR018114 (PROSITE_PATTERNS); NON_CYTOPLASMIC_DOMAIN (PHOBIUS); TRANSMEMBRANE (PHOBIUS); CYTOPLASMIC_DOMAIN (PHOBIUS); IPR001254 (PROSITE_PROFILES); SignalP-TM (SIGNALP_GRAM_POSITIVE); IPR009003 (SUPERFAMILY); TMhelix (TMHMM)                                                                                                                                                                          |
| 771 | c24949_g1_i1_len_1027_path_105_0_1026_3                                                               | 798 | protein them6                                         | 337 | 4.26E-32  | 55.60% | 0.114 | PF13279 (PFAM); IPR029069 (G3DSA:3.10.129.GENE3D); PTHR12475 (PANTHER); TRANSMEMBRANE (PHOBIUS); CYTOPLASMIC_DOMAIN (PHOBIUS); NON_CYTOPLASMIC_DOMAIN (PHOBIUS); IPR029069 (SUPERFAMILY); TMhelix (TMHMM); TMhelix (TMHMM)                                                                                                                                                                                                                                                                                                                                                                              |

|     |                                                                                                       |      |                                                      |     |           |        |         |                                                                                                                                                                                                                                                                                                                                                                                                                                                                                                                                                                                                                                                                        |
|-----|-------------------------------------------------------------------------------------------------------|------|------------------------------------------------------|-----|-----------|--------|---------|------------------------------------------------------------------------------------------------------------------------------------------------------------------------------------------------------------------------------------------------------------------------------------------------------------------------------------------------------------------------------------------------------------------------------------------------------------------------------------------------------------------------------------------------------------------------------------------------------------------------------------------------------------------------|
| 772 | c24982_g2_i1_len_495_path_724_0_86_810_87_329_1053_330_353_3184_354_383_3214_384_407_5964_408_470_3_3 | 8    | zinc finger protein                                  | 165 | 5.88E-30  | 56.90% | 0.119   | IPR015880 (SMART); PF13894 (PFAM); IPR013087 (G3DSA:3.30.160.GENE3D); IPR013087 (G3DSA:3.30.160.GENE3D); IPR013087 (G3DSA:3.30.160.GENE3D); IPR007087 (PFAM); IPR013087 (G3DSA:3.30.160.GENE3D); PTHR24409 (PANTHER); PTHR24409:SF14 (PANTHER); IPR007087 (PROSITE_PATTERNS); IPR007087 (PROSITE_PATTERNS); IPR007087 (PROSITE_PATTERNS); IPR007087 (PROSITE_PATTERNS); IPR007087 (PROSITE_PATTERNS); IPR007087 (PROSITE_PATTERNS); IPR007087 (PROSITE_PROFILES); IPR007087 (PROSITE_PROFILES); IPR007087 (PROSITE_PROFILES); IPR007087 (PROSITE_PROFILES); IPR007087 (PROSITE_PROFILES); IPR007087 (PROSITE_PROFILES); SSF57667 (SUPERFAMILY); SSF57667 (SUPERFAMILY) |
| 773 | c24982_g3_i2_len_759_path_2771_0_389_1053_390_413_1077_414_435_1099_436_758_3                         | 11   | zinc finger protein                                  | 253 | 1.10E-21  | 52.20% | 0.099   | IPR015880 (SMART); PF13465 (PFAM); IPR007087 (PFAM); PF13894 (PFAM); IPR013087 (G3DSA:3.30.160.GENE3D); PTHR24375:SF106 (PANTHER); PTHR24375 (PANTHER); IPR007087 (PROSITE_PATTERNS); IPR007087 (PROSITE_PATTERNS); IPR007087 (PROSITE_PATTERNS); IPR007087 (PROSITE_PATTERNS); IPR007087 (PROSITE_PATTERNS); IPR007087 (PROSITE_PATTERNS); IPR007087 (PROSITE_PROFILES); IPR007087 (PROSITE_PROFILES); IPR007087 (PROSITE_PROFILES); IPR007087 (PROSITE_PROFILES); IPR007087 (PROSITE_PROFILES); SSF57667 (SUPERFAMILY); SSF57667 (SUPERFAMILY)                                                                                                                       |
| 774 | c24989_g1_i1_len_791_path_53_0_342_52_343_431_1706_432_432_483_433_489_1616_490_501_557_502_790_0     | 23   | peptidase s8                                         | 264 | 2.72E-24  | 69.00% | 0.361 Y | IPR007280 (PFAM); SIGNAL_PEPTIDE_C_REGION (PHOBIUS); SIGNAL_PEPTIDE (PHOBIUS); CYTOPLASMIC_DOMAIN (PHOBIUS); SIGNAL_PEPTIDE_N_REGION (PHOBIUS); SIGNAL_PEPTIDE_H_REGION (PHOBIUS); TRANSMEMBRANE (PHOBIUS); NON_CYTOPLASMIC_DOMAIN (PHOBIUS); TMhelix (TMHMM); TMhelix (TMHMM)                                                                                                                                                                                                                                                                                                                                                                                         |
| 775 | c25072_g2_i1_len_896_path_3050_0_447_3495_448_461_130_462_895_4                                       | 20   | upf0454 protein c12orf49 homolog                     | 299 | 7.49E-109 | 76.00% | 0.1     | IPR019352 (PFAM); IPR019352 (PANTHER); CYTOPLASMIC_DOMAIN (PHOBIUS); TRANSMEMBRANE (PHOBIUS); NON_CYTOPLASMIC_DOMAIN (PHOBIUS); TMhelix (TMHMM)                                                                                                                                                                                                                                                                                                                                                                                                                                                                                                                        |
| 776 | c25095_g2_i1_len_611_path_3077_0_246_3322_247_276_3322_277_306_2857_307_414_1658_415_444_1658_445_4_4 | 7    | repetitive proline-rich cell wall protein 2- partial | 204 | 3.83E-18  | 42.50% | 0.108   | no IPS match                                                                                                                                                                                                                                                                                                                                                                                                                                                                                                                                                                                                                                                           |
| 777 | c25112_g1_i1_len_2141_path_53_0_347_399_348_350_402_351_2140_3                                        | 232  | ww domain-containing oxidoreductase                  | 708 | 3.87E-164 | 74.70% | 0.669 Y | Coil (COILS); IPR002347 (PRINTS); IPR001202 (SMART); G3DSA:2.20.70.10 (GENE3D); IPR016040 (G3DSA:3.40.50.GENE3D); IPR002198 (PFAM); PTHR24316 (PANTHER); PTHR24316:SF115 (PANTHER); SIGNAL_PEPTIDE_H_REGION (PHOBIUS); SIGNAL_PEPTIDE_C_REGION (PHOBIUS); SIGNAL_PEPTIDE (PHOBIUS); SIGNAL_PEPTIDE_N_REGION (PHOBIUS); NON_CYTOPLASMIC_DOMAIN (PHOBIUS); IPR001202 (PROSITE_PROFILES); SignalP-noTM (SIGNALP_EUK); IPR001202 (SUPERFAMILY); SSF51735 (SUPERFAMILY)                                                                                                                                                                                                     |
| 778 | c25117_g1_i1_len_403_path_639_0_402_2                                                                 | 301  | transmembrane protease serine 9- partial             | 134 | 3.22E-20  | 54.90% | 0.104   | IPR001314 (PRINTS); IPR001254 (SMART); G3DSA:2.40.10.10 (GENE3D); G3DSA:2.40.10.10 (GENE3D); IPR001254 (PFAM); PTHR24256 (PANTHER); IPR018114 (PROSITE_PATTERNS); IPR001254 (PROSITE_PROFILES); IPR009003 (SUPERFAMILY)                                                                                                                                                                                                                                                                                                                                                                                                                                                |
| 779 | c2520_g1_i1_len_1334_path_1_0_1333_4                                                                  | 181  | neurofilament triplet h protein                      | 445 | 4.15E-09  | 52.20% | 0.107   | NON_CYTOPLASMIC_DOMAIN (PHOBIUS); CYTOPLASMIC_DOMAIN (PHOBIUS); TRANSMEMBRANE (PHOBIUS); NON_CYTOPLASMIC_DOMAIN (PHOBIUS); CYTOPLASMIC_DOMAIN (PHOBIUS); TRANSMEMBRANE (PHOBIUS); TRANSMEMBRANE (PHOBIUS); TMhelix (TMHMM); TMhelix (TMHMM)                                                                                                                                                                                                                                                                                                                                                                                                                            |
| 780 | c25203_g1_i1_len_1264_path_802_0_799_1602_800_1010_1679_1011_1263_3                                   | 21   | alcohol dehydrogenase                                | 422 | 2.91E-108 | 67.20% | 0.147   | IPR020471 (PRINTS); IPR023210 (PFAM); IPR023210 (G3DSA:3.20.20.GENE3D); PTHR11732:SF183 (PANTHER); IPR001395 (PANTHER); IPR018170 (PROSITE_PATTERNS); IPR018170 (PROSITE_PATTERNS); IPR023210 (SUPERFAMILY)                                                                                                                                                                                                                                                                                                                                                                                                                                                            |
| 781 | c25203_g2_i1_len_1267_path_3465_0_578_1602_579_789_4251_790_1266_5                                    | 17   | alcohol dehydrogenase                                | 422 | 1.17E-16  | 68.90% | 0.283   | IPR023210 (G3DSA:3.20.20.GENE3D); IPR001395 (PANTHER); PTHR11732:SF183 (PANTHER); NON_CYTOPLASMIC_DOMAIN (PHOBIUS); TRANSMEMBRANE (PHOBIUS); NON_CYTOPLASMIC_DOMAIN (PHOBIUS); CYTOPLASMIC_DOMAIN (PHOBIUS); TRANSMEMBRANE (PHOBIUS); IPR023210 (SUPERFAMILY); TMhelix (TMHMM)                                                                                                                                                                                                                                                                                                                                                                                         |
| 782 | c25222_g1_i1_len_1428_path_843_0_1039_50_1040_1427_1                                                  | 1652 | ribosome biogenesis protein wdr12 homolog            | 470 | 0         | 74.50% | 0.136   | IPR020472 (PRINTS); IPR001680 (SMART); IPR012972 (PFAM); IPR001680 (PFAM); IPR015943 (G3DSA:2.130.10.GENE3D); PTHR19855 (PANTHER); IPR019775 (PROSITE_PATTERNS); IPR001680 (PROSITE_PROFILES); IPR017986 (PROSITE_PROFILES); IPR001680 (PROSITE_PROFILES); IPR001680 (PROSITE_PROFILES); IPR028599 (HAMAP); IPR001680 (PROSITE_PROFILES); IPR017986 (SUPERFAMILY)                                                                                                                                                                                                                                                                                                      |



|     |                                                                               |       |                                          |     |           |        |       |                                                                                                                                                                                                                                                                                                                                                                                                                                                                                                                                                                                                                                                                                                                                                               |
|-----|-------------------------------------------------------------------------------|-------|------------------------------------------|-----|-----------|--------|-------|---------------------------------------------------------------------------------------------------------------------------------------------------------------------------------------------------------------------------------------------------------------------------------------------------------------------------------------------------------------------------------------------------------------------------------------------------------------------------------------------------------------------------------------------------------------------------------------------------------------------------------------------------------------------------------------------------------------------------------------------------------------|
| 783 | c25243_g1_i1_len_2102_path_78_0_23_102_24_249_324_250_1127_1200_1128_2101_1   | 2744  | adp-ribosylation factor 2                | 695 | 1.27E-116 | 95.70% | 0.109 | IPR006689 (PRINTS); IPR006687 (SMART); IPR024156 (SMART); IPR003579 (SMART); IPR006689 (PFAM); IPR027417 (G3DSA:3.40.50.GENE3D); IPR005225 (TIGRFAM); PTHR11711:SF153 (PANTHER); PTHR11711 (PANTHER); TRANSMEMBRANE (PHOBIUS); CYTOPLASMIC_DOMAIN (PHOBIUS); NON_CYTOPLASMIC_DOMAIN (PHOBIUS); TRANSMEMBRANE (PHOBIUS); NON_CYTOPLASMIC_DOMAIN (PHOBIUS); TRANSMEMBRANE (PHOBIUS); NON_CYTOPLASMIC_DOMAIN (PHOBIUS); TRANSMEMBRANE (PHOBIUS); CYTOPLASMIC_DOMAIN (PHOBIUS); TRANSMEMBRANE (PHOBIUS); IPR024156 (PROSITE_PROFILES); IPR027417 (SUPERFAMILY); TMhelix (TMHMM); TMhelix (TMHMM); TMhelix (TMHMM); TMhelix (TMHMM); TMhelix (TMHMM); TMhelix (TMHMM)                                                                                              |
| 784 | c25243_g1_i2_len_2101_path_4447_0_22_102_23_248_324_249_1126_1200_1127_2100_0 | 2762  | adp-ribosylation factor 2                | 695 | 1.08E-116 | 95.70% | 0.11  | IPR006689 (PRINTS); IPR024156 (SMART); IPR006687 (SMART); IPR003579 (SMART); IPR005225 (TIGRFAM); IPR027417 (G3DSA:3.40.50.GENE3D); IPR006689 (PFAM); PTHR11711:SF153 (PANTHER); PTHR11711 (PANTHER); CYTOPLASMIC_DOMAIN (PHOBIUS); TRANSMEMBRANE (PHOBIUS); TRANSMEMBRANE (PHOBIUS); NON_CYTOPLASMIC_DOMAIN (PHOBIUS); TRANSMEMBRANE (PHOBIUS); NON_CYTOPLASMIC_DOMAIN (PHOBIUS); TRANSMEMBRANE (PHOBIUS); NON_CYTOPLASMIC_DOMAIN (PHOBIUS); TRANSMEMBRANE (PHOBIUS); NON_CYTOPLASMIC_DOMAIN (PHOBIUS); TRANSMEMBRANE (PHOBIUS); CYTOPLASMIC_DOMAIN (PHOBIUS); IPR024156 (PROSITE_PROFILES); IPR027417 (SUPERFAMILY); TMhelix (TMHMM); TMhelix (TMHMM) |
| 785 | c25243_g1_i3_len_2073_path_103_0_220_324_221_1098_1200_1099_2072_2            | 2770  | adp-ribosylation factor 4                | 685 | 2.73E-112 | 93.20% | 0.157 | IPR006689 (PRINTS); IPR024156 (SMART); IPR006687 (SMART); IPR003579 (SMART); IPR005225 (TIGRFAM); IPR027417 (G3DSA:3.40.50.GENE3D); IPR006689 (PFAM); PTHR11711 (PANTHER); PTHR11711:SF153 (PANTHER); NON_CYTOPLASMIC_DOMAIN (PHOBIUS); TRANSMEMBRANE (PHOBIUS); CYTOPLASMIC_DOMAIN (PHOBIUS); TRANSMEMBRANE (PHOBIUS); CYTOPLASMIC_DOMAIN (PHOBIUS); NON_CYTOPLASMIC_DOMAIN (PHOBIUS); TRANSMEMBRANE (PHOBIUS); TRANSMEMBRANE (PHOBIUS); IPR024156 (PROSITE_PROFILES); IPR027417 (SUPERFAMILY); TMhelix (TMHMM); TMhelix (TMHMM); TMhelix (TMHMM); TMhelix (TMHMM)                                                                                                                                                                                           |
| 786 | c25266_g1_i1_len_1618_path_3274_0_1053_25_1054_1617_2                         | 21543 | glyceraldehyde-3-phosphate dehydrogenase | 533 | 0         | 89.90% | 0.126 | IPR020831 (PRINTS); IPR020828 (SMART); IPR006424 (TIGRFAM); IPR020829 (PFAM); G3DSA:3.30.360.10 (GENE3D); IPR016040 (G3DSA:3.40.50.GENE3D); IPR020828 (PFAM); IPR020831 (PANTHER); IPR020830 (PROSITE_PATTERNS); NON_CYTOPLASMIC_DOMAIN (PHOBIUS); TRANSMEMBRANE (PHOBIUS); CYTOPLASMIC_DOMAIN (PHOBIUS); TRANSMEMBRANE (PHOBIUS); CYTOPLASMIC_DOMAIN (PHOBIUS); SSF51735 (SUPERFAMILY); SSF55347 (SUPERFAMILY)                                                                                                                                                                                                                                                                                                                                               |
| 787 | c25266_g1_i2_len_2119_path_3274_0_1053_432_7_1054_2118_2                      | 27390 | glyceraldehyde-3-phosphate dehydrogenase | 700 | 0         | 90.30% | 0.126 | IPR020831 (PRINTS); IPR020828 (SMART); G3DSA:3.30.360.10 (GENE3D); IPR020828 (PFAM); IPR006424 (TIGRFAM); IPR016040 (G3DSA:3.40.50.GENE3D); IPR020829 (PFAM); IPR020831 (PANTHER); IPR020830 (PROSITE_PATTERNS); TRANSMEMBRANE (PHOBIUS); NON_CYTOPLASMIC_DOMAIN (PHOBIUS); TRANSMEMBRANE (PHOBIUS); TRANSMEMBRANE (PHOBIUS); NON_CYTOPLASMIC_DOMAIN (PHOBIUS); CYTOPLASMIC_DOMAIN (PHOBIUS); CYTOPLASMIC_DOMAIN (PHOBIUS); CYTOPLASMIC_DOMAIN (PHOBIUS); NON_CYTOPLASMIC_DOMAIN (PHOBIUS); TRANSMEMBRANE (PHOBIUS); SSF51735 (SUPERFAMILY); SSF55347 (SUPERFAMILY); TMhelix (TMHMM); TMhelix (TMHMM); TMhelix (TMHMM)                                                                                                                                        |
| 788 | c25267_g1_i1_len_1787_path_1765_0_1786_0                                      | 152   | aael003561- partial                      | 596 | 7.46E-24  | 52.80% | 0.144 | IPR001211 (PRINTS); IPR016090 (SMART); IPR016090 (G3DSA:1.20.90.GENE3D); IPR016090 (PFAM); PTHR11716:SF45 (PANTHER); IPR001211 (PANTHER); IPR013090 (PROSITE_PATTERNS); IPR013090 (PROSITE_PATTERNS); NON_CYTOPLASMIC_DOMAIN (PHOBIUS); TRANSMEMBRANE (PHOBIUS); CYTOPLASMIC_DOMAIN (PHOBIUS); CYTOPLASMIC_DOMAIN (PHOBIUS); NON_CYTOPLASMIC_DOMAIN (PHOBIUS); TRANSMEMBRANE (PHOBIUS); IPR016090 (SUPERFAMILY); TMhelix (TMHMM)                                                                                                                                                                                                                                                                                                                              |

|     |                                                                                                    |     |                                           |     |           |        |       |                                                                                                                                                                                                                                                                                                                                                                                                                                                                                                                                                                                                                                                                                                                                                                                                                                                                                                                                                                                                                    |
|-----|----------------------------------------------------------------------------------------------------|-----|-------------------------------------------|-----|-----------|--------|-------|--------------------------------------------------------------------------------------------------------------------------------------------------------------------------------------------------------------------------------------------------------------------------------------------------------------------------------------------------------------------------------------------------------------------------------------------------------------------------------------------------------------------------------------------------------------------------------------------------------------------------------------------------------------------------------------------------------------------------------------------------------------------------------------------------------------------------------------------------------------------------------------------------------------------------------------------------------------------------------------------------------------------|
| 789 | c25270_g1_i3_len_2912_path_2890_0_744_3635_745_1477_4368_1478_2160_5051_2161_2308_5199_2309_2911_0 | 128 | wd repeat-containing protein 36           | 965 | 0         | 69.70% | 0.157 | IPR001680 (SMART); IPR001680 (PFAM); IPR007319 (PFAM); IPR015943 (G3DSA:2.130.10.GENE3D); IPR015943 (G3DSA:2.130.10.GENE3D); PTHR13889 (PANTHER); PTHR13889:SF2 (PANTHER); IPR001680 (PROSITE_PROFILES); IPR001680 (PROSITE_PROFILES); IPR017986 (PROSITE_PROFILES); IPR001680 (PROSITE_PROFILES); IPR017986 (PROSITE_PROFILES); IPR017986 (SUPERFAMILY); IPR017986 (SUPERFAMILY)                                                                                                                                                                                                                                                                                                                                                                                                                                                                                                                                                                                                                                  |
| 790 | c25309_g1_i1_len_2232_path_2210_0_1342_355_3_1343_1343_3554_1344_2231_0                            | 190 | dnaj homolog subfamily c member 3-like    | 744 | 0         | 74.20% | 0.142 | Coil (COILS); IPR001623 (PRINTS); IPR019734 (SMART); IPR001623 (SMART); IPR011990 (G3DSA:1.25.40.GENE3D); IPR001623 (G3DSA:1.10.287.GENE3D); IPR013105 (PFAM); IPR011990 (G3DSA:1.25.40.GENE3D); PF13414 (PFAM); IPR001623 (PFAM); PTHR24078 (PANTHER); IPR026901 (PTHR24078:PANTHER); NON_CYTOPLASMIC_DOMAIN (PHOBIUS); TRANSMEMBRANE (PHOBIUS); CYTOPLASMIC_DOMAIN (PHOBIUS); TRANSMEMBRANE (PHOBIUS); CYTOPLASMIC_DOMAIN (PHOBIUS); IPR019734 (PROSITE_PROFILES); IPR001623 (PROSITE_PROFILES); IPR019734 (PROSITE_PROFILES); IPR019734 (PROSITE_PROFILES); IPR019734 (PROSITE_PROFILES); IPR019734 (PROSITE_PROFILES); IPR013026 (PROSITE_PROFILES); IPR013026 (PROSITE_PROFILES); IPR019734 (PROSITE_PROFILES); SSF48452 (SUPERFAMILY); IPR001623 (SUPERFAMILY); SSF48452 (SUPERFAMILY); TMhelix (TMHMM); TMhelix (TMHMM)                                                                                                                                                                                     |
| 791 | c25332_g1_i1_len_1386_path_448_0_353_372_3_54_1385_0                                               | 908 | prolyl 3-hydroxylase partial              | 462 | 1.38E-121 | 66.30% | 0.221 | IPR011990 (G3DSA:1.25.40.GENE3D); PTHR13986:SF8 (PANTHER); PTHR13986 (PANTHER); TRANSMEMBRANE (PHOBIUS); NON_CYTOPLASMIC_DOMAIN (PHOBIUS); CYTOPLASMIC_DOMAIN (PHOBIUS); TMhelix (TMHMM)                                                                                                                                                                                                                                                                                                                                                                                                                                                                                                                                                                                                                                                                                                                                                                                                                           |
| 792 | c25356_g1_i1_len_899_path_1113_0_12_1126_13_707_2744_708_898_2                                     | 30  | low quality protein: titin-like           | 294 | 9.78E-134 | 88.60% | 0.1   | IPR003599 (SMART); IPR003598 (SMART); IPR013098 (PFAM); IPR013783 (G3DSA:2.60.40.GENE3D); IPR010939 (PFAM); IPR013783 (G3DSA:2.60.40.GENE3D); PTHR19897 (PANTHER); PTHR19897:SF149 (PANTHER); IPR007110 (PROSITE_PROFILES); IPR007110 (PROSITE_PROFILES); SSF48726 (SUPERFAMILY); SSF48726 (SUPERFAMILY)                                                                                                                                                                                                                                                                                                                                                                                                                                                                                                                                                                                                                                                                                                           |
| 793 | c25356_g1_i2_len_1134_path_2225_0_247_1126_248_942_2744_943_1133_0                                 | 34  | low quality protein: titin-like           | 373 | 1.70E-176 | 88.20% | 0.099 | IPR003598 (SMART); IPR003599 (SMART); IPR013783 (G3DSA:2.60.40.GENE3D); IPR010939 (PFAM); IPR013783 (G3DSA:2.60.40.GENE3D); IPR013783 (G3DSA:2.60.40.GENE3D); IPR013098 (PFAM); PTHR19897:SF149 (PANTHER); PTHR19897 (PANTHER); IPR007110 (PROSITE_PROFILES); IPR007110 (PROSITE_PROFILES); SSF48726 (SUPERFAMILY); SSF48726 (SUPERFAMILY)                                                                                                                                                                                                                                                                                                                                                                                                                                                                                                                                                                                                                                                                         |
| 794 | c25356_g1_i3_len_1135_path_1113_0_12_1126_13_707_1821_708_1134_2                                   | 29  | isoform z                                 | 378 | 2.16E-159 | 79.20% | 0.1   | IPR003598 (SMART); IPR003599 (SMART); IPR010939 (PFAM); IPR013098 (PFAM); IPR013783 (G3DSA:2.60.40.GENE3D); IPR013783 (G3DSA:2.60.40.GENE3D); PTHR19897:SF149 (PANTHER); PTHR19897 (PANTHER); IPR007110 (PROSITE_PROFILES); IPR007110 (PROSITE_PROFILES); SSF48726 (SUPERFAMILY); SSF48726 (SUPERFAMILY); SSF48726 (SUPERFAMILY)                                                                                                                                                                                                                                                                                                                                                                                                                                                                                                                                                                                                                                                                                   |
| 795 | c25410_g1_i1_len_1899_path_3767_0_109_18_110_1483_1392_1484_1485_1394_1486_1898_5                  | 164 | zinc finger protein 37 homolog isoform x1 | 633 | 7.19E-70  | 64.00% | 0.14  | IPR000210 (SMART); IPR015880 (SMART); IPR013087 (G3DSA:3.30.160.GENE3D); IPR013087 (G3DSA:3.30.160.GENE3D); G3DSA:3.30.710.10 (GENE3D); IPR013069 (PFAM); IPR007087 (PFAM); IPR013087 (G3DSA:3.30.160.GENE3D); IPR013087 (G3DSA:3.30.160.GENE3D); PF13465 (PFAM); PTHR24409 (PANTHER); IPR007087 (PROSITE_PATTERNS); IPR007087 (PROSITE_PATTERNS); IPR007087 (PROSITE_PATTERNS); IPR007087 (PROSITE_PATTERNS); IPR007087 (PROSITE_PATTERNS); IPR007087 (PROSITE_PATTERNS); NON_CYTOPLASMIC_DOMAIN (PHOBIUS); CYTOPLASMIC_DOMAIN (PHOBIUS); TRANSMEMBRANE (PHOBIUS); IPR007087 (PROSITE_PROFILES); IPR007087 (PROSITE_PROFILES); IPR007087 (PROSITE_PROFILES); IPR000210 (PROSITE_PROFILES); IPR007087 (PROSITE_PROFILES); IPR007087 (PROSITE_PROFILES); IPR007087 (PROSITE_PROFILES); IPR007087 (PROSITE_PROFILES); IPR007087 (PROSITE_PROFILES); SSF57667 (SUPERFAMILY); SSF57667 (SUPERFAMILY); SSF57667 (SUPERFAMILY); SSF57667 (SUPERFAMILY); SSF57667 (SUPERFAMILY); IPR011333 (SUPERFAMILY); TMhelix (TMHMM) |

|     |                                                                                              |     |                                                     |     |           |        |       |                                                                                                                                                                                                                                                                                                                                                                                                                                                                                                                                                                                                                                                                                                                                                                                                                                                                                             |
|-----|----------------------------------------------------------------------------------------------|-----|-----------------------------------------------------|-----|-----------|--------|-------|---------------------------------------------------------------------------------------------------------------------------------------------------------------------------------------------------------------------------------------------------------------------------------------------------------------------------------------------------------------------------------------------------------------------------------------------------------------------------------------------------------------------------------------------------------------------------------------------------------------------------------------------------------------------------------------------------------------------------------------------------------------------------------------------------------------------------------------------------------------------------------------------|
| 796 | c25410_g1_i2_len_1805_path_2_0_15_18_16_1_389_1392_1390_1391_1394_1392_1804_5                | 160 | zinc finger protein 37 homolog                      | 595 | 2.24E-57  | 64.00% | 0.14  | IPR000210 (SMART); IPR015880 (SMART); IPR007087 (PFAM); IPR013087 (G3DSA:3.30.160.GENE3D); G3DSA:3.30.710.10 (GENE3D); IPR013069 (PFAM); IPR013087 (G3DSA:3.30.160.GENE3D); PF13465 (PFAM); IPR013087 (G3DSA:3.30.160.GENE3D); PTHR24409 (PANTHER); IPR007087 (PROSITE_PATTERNS); IPR007087 (PROSITE_PATTERNS); IPR007087 (PROSITE_PATTERNS); IPR007087 (PROSITE_PATTERNS); IPR007087 (PROSITE_PATTERNS); IPR007087 (PROSITE_PATTERNS); NON_CYTOPLASMIC_DOMAIN (PHOBIUS); TRANSMEMBRANE (PHOBIUS); CYTOPLASMIC_DOMAIN (PHOBIUS); IPR007087 (PROSITE_PROFILES); IPR007087 (PROSITE_PROFILES); IPR007087 (PROSITE_PROFILES); IPR007087 (PROSITE_PROFILES); IPR000210 (PROSITE_PROFILES); IPR007087 (PROSITE_PROFILES); IPR007087 (PROSITE_PROFILES); SSF57667 (SUPERFAMILY); SSF57667 (SUPERFAMILY); SSF57667 (SUPERFAMILY); SSF57667 (SUPERFAMILY); IPR011333 (SUPERFAMILY); TMhelix (TMHMM) |
| 797 | c25427_g1_i1_len_1784_path_1812_0_1783_2                                                     | 712 | atpase family aaa domain-containing protein 1-b     | 588 | 1.68E-164 | 77.60% | 0.122 | IPR003593 (SMART); G3DSA:1.10.8.60 (GENE3D); IPR003959 (PFAM); IPR027417 (G3DSA:3.40.50.GENE3D); PTHR23074:SF20 (PANTHER); PTHR23074 (PANTHER); IPR003960 (PROSITE_PATTERNS); NON_CYTOPLASMIC_DOMAIN (PHOBIUS); TRANSMEMBRANE (PHOBIUS); TRANSMEMBRANE (PHOBIUS); TRANSMEMBRANE (PHOBIUS); NON_CYTOPLASMIC_DOMAIN (PHOBIUS); CYTOPLASMIC_DOMAIN (PHOBIUS); CYTOPLASMIC_DOMAIN (PHOBIUS); IPR027417 (SUPERFAMILY)                                                                                                                                                                                                                                                                                                                                                                                                                                                                            |
| 798 | c25433_g1_i1_len_2356_path_2384_0_893_3278_894_897_3282_898_962_3347_963_964_3349_965_2355_2 | 221 | neural cell adhesion molecule ncam-140 and ncam-180 | 777 | 2.16E-16  | 57.60% | 0.283 | CYTOPLASMIC_DOMAIN (PHOBIUS); TRANSMEMBRANE (PHOBIUS); NON_CYTOPLASMIC_DOMAIN (PHOBIUS); TRANSMEMBRANE (PHOBIUS); NON_CYTOPLASMIC_DOMAIN (PHOBIUS); TRANSMEMBRANE (PHOBIUS); CYTOPLASMIC_DOMAIN (PHOBIUS); NON_CYTOPLASMIC_DOMAIN (PHOBIUS); CYTOPLASMIC_DOMAIN (PHOBIUS); TRANSMEMBRANE (PHOBIUS); TRANSMEMBRANE (PHOBIUS); NON_CYTOPLASMIC_DOMAIN (PHOBIUS); TRANSMEMBRANE (PHOBIUS); TMhelix (TMHMM); TMhelix (TMHMM); TMhelix (TMHMM); TMhelix (TMHMM)                                                                                                                                                                                                                                                                                                                                                                                                                                  |
| 799 | c25446_g1_i1_len_402_path_103_0_45_1523_46_231_50_232_401_1                                  | 39  | chymotrypsin-like elastase family member 2a         | 134 | 3.50E-11  | 60.00% | 0.126 | G3DSA:2.40.10.10 (GENE3D); IPR001254 (PFAM); PTHR24268 (PANTHER); PTHR24268:SF72 (PANTHER); IPR018114 (PROSITE_PATTERNS); IPR001254 (PROSITE_PROFILES); IPR009003 (SUPERFAMILY)                                                                                                                                                                                                                                                                                                                                                                                                                                                                                                                                                                                                                                                                                                             |
| 800 | c25446_g1_i2_len_465_path_103_0_45_1523_46_231_1561_232_232_1260_233_464_1                   | 37  | chymotrypsin-like elastase family member 2a         | 155 | 9.83E-12  | 58.20% | 0.126 | G3DSA:2.40.10.10 (GENE3D); IPR001254 (PFAM); PTHR24268 (PANTHER); PTHR24268:SF72 (PANTHER); IPR018114 (PROSITE_PATTERNS); IPR001254 (PROSITE_PROFILES); IPR009003 (SUPERFAMILY)                                                                                                                                                                                                                                                                                                                                                                                                                                                                                                                                                                                                                                                                                                             |
| 801 | c25446_g1_i4_len_288_path_103_0_45_1523_46_231_1561_232_232_335_233_287_1                    | 14  | chymotrypsin-like elastase family member 2a         | 96  | 5.15E-18  | 59.70% | 0.126 | IPR001314 (PRINTS); G3DSA:2.40.10.10 (GENE3D); IPR001254 (PFAM); G3DSA:2.40.10.10 (GENE3D); PTHR24265 (PANTHER); IPR018114 (PROSITE_PATTERNS); IPR001254 (PROSITE_PROFILES); IPR009003 (SUPERFAMILY)                                                                                                                                                                                                                                                                                                                                                                                                                                                                                                                                                                                                                                                                                        |
| 802 | c25506_g2_i1_len_1196_path_1389_0_959_332_960_1061_2447_1062_1195_4                          | 328 | 26s proteasome non-atpase regulatory subunit 10     | 399 | 1.11E-77  | 71.40% | 0.128 | IPR002110 (PRINTS); IPR002110 (SMART); IPR020683 (G3DSA:1.25.40.GENE3D); IPR020683 (PFAM); IPR020683 (G3DSA:1.25.40.GENE3D); PTHR24199 (PANTHER); CYTOPLASMIC_DOMAIN (PHOBIUS); TRANSMEMBRANE (PHOBIUS); NON_CYTOPLASMIC_DOMAIN (PHOBIUS); CYTOPLASMIC_DOMAIN (PHOBIUS); TRANSMEMBRANE (PHOBIUS); IPR020683 (PROSITE_PROFILES); IPR002110 (PROSITE_PROFILES); IPR002110 (PROSITE_PROFILES); IPR002110 (PROSITE_PROFILES); IPR002110 (PROSITE_PROFILES); IPR002110 (PROSITE_PROFILES); IPR020683 (SUPERFAMILY); TMhelix (TMHMM); TMhelix (TMHMM)                                                                                                                                                                                                                                                                                                                                             |
| 803 | c25550_g1_i1_len_1928_path_3593_0_675_1688_676_879_1892_880_1927_3                           | 55  | otog_mouse ame: full=otogelin flags: precursor      | 643 | 3.23E-11  | 41.60% | 0.1   | no IPS match                                                                                                                                                                                                                                                                                                                                                                                                                                                                                                                                                                                                                                                                                                                                                                                                                                                                                |
| 804 | c25550_g1_i1_len_1928_path_3593_0_675_1688_676_879_1892_880_1927_4                           | 55  | otogelin-like protein                               | 643 | 4.14E-15  | 47.60% | 0.116 | no IPS match                                                                                                                                                                                                                                                                                                                                                                                                                                                                                                                                                                                                                                                                                                                                                                                                                                                                                |
| 805 | c25560_g1_i1_len_1305_path_1333_0_96_1430_97_312_1646_313_1304_2                             | 107 | serine threonine-protein kinase sbk1                | 435 | 7.03E-148 | 71.40% | 0.325 | IPR002290 (SMART); IPR000719 (PFAM); G3DSA:3.30.200.20 (GENE3D); G3DSA:1.10.510.10 (GENE3D); PTHR24359 (PANTHER); IPR008271 (PROSITE_PATTERNS); NON_CYTOPLASMIC_DOMAIN (PHOBIUS); SIGNAL_PEPTIDE (PHOBIUS); SIGNAL_PEPTIDE_C_REGION (PHOBIUS); SIGNAL_PEPTIDE_H_REGION (PHOBIUS); SIGNAL_PEPTIDE_N_REGION (PHOBIUS); IPR000719 (PROSITE_PROFILES); SignalP-TM (SIGNALP GRAM POSITIVE); IPR011009 (SUPERFAMILY)                                                                                                                                                                                                                                                                                                                                                                                                                                                                              |

|     |                                                                                                  |      |                                                        |     |           |        |         |                                                                                                                                                                                                                                                                                                                                                                                                                                                                                                                                                                                                                                                                                                                                                                                                                                           |
|-----|--------------------------------------------------------------------------------------------------|------|--------------------------------------------------------|-----|-----------|--------|---------|-------------------------------------------------------------------------------------------------------------------------------------------------------------------------------------------------------------------------------------------------------------------------------------------------------------------------------------------------------------------------------------------------------------------------------------------------------------------------------------------------------------------------------------------------------------------------------------------------------------------------------------------------------------------------------------------------------------------------------------------------------------------------------------------------------------------------------------------|
| 806 | c25560_g1_i2_len_1223_path_2613_0_14_1430_15_230_1646_231_1222_1                                 | 104  | serine threonine-protein kinase sbk1                   | 408 | 1.14E-147 | 70.80% | 0.138   | IPR002290 (SMART); G3DSA:1.10.510.10 (GENE3D); G3DSA:3.30.200.20 (GENE3D); IPR000719 (PFAM); PTHR24359 (PANTHER); IPR008271 (PROSITE_PATTERNS); IPR000719 (PROSITE_PROFILES); IPR011009 (SUPERFAMILY)                                                                                                                                                                                                                                                                                                                                                                                                                                                                                                                                                                                                                                     |
| 807 | c25640_g1_i1_len_1234_path_481_0_20_782_21_44_806_45_1233_3                                      | 43   | dnaj homolog subfamily c member 30-like                | 412 | 1.26E-26  | 51.20% | 0.114   | IPR001623 (PRINTS); IPR001623 (SMART); IPR001623 (G3DSA:1.10.287.GENE3D); IPR001623 (PFAM); PTHR24078 (PANTHER); PTHR24078:SF171 (PANTHER); IPR018253 (PROSITE_PATTERNS); TRANSMEMBRANE (PHOBIUS); NON_CYTOPLASMIC_DOMAIN (PHOBIUS); CYTOPLASMIC_DOMAIN (PHOBIUS); TRANSMEMBRANE (PHOBIUS); CYTOPLASMIC_DOMAIN (PHOBIUS); IPR001623 (PROSITE_PROFILES); IPR001623 (SUPERFAMILY); TMhelix (TMHMM); TMhelix (TMHMM)                                                                                                                                                                                                                                                                                                                                                                                                                         |
| 808 | c25648_g1_i1_len_1521_path_101_0_1520_5                                                          | 1319 | ferritin 1-like protein a                              | 507 | 2.51E-45  | 64.70% | 0.312   | IPR012347 (G3DSA:1.20.1260.GENE3D); IPR008331 (PFAM); IPR001519 (PANTHER); PTHR11431:SF29 (PANTHER); NON_CYTOPLASMIC_DOMAIN (PHOBIUS); CYTOPLASMIC_DOMAIN (PHOBIUS); TRANSMEMBRANE (PHOBIUS); IPR009040 (PROSITE_PROFILES); IPR009078 (SUPERFAMILY)                                                                                                                                                                                                                                                                                                                                                                                                                                                                                                                                                                                       |
| 809 | c25692_g1_i1_len_243_path_329_0_7_337_8_18_743_19_242_3                                          | 0    | zinc finger and scan domain-containing protein 2       | 81  | 2.16E-12  | 61.90% | 0.109   | IPR015880 (SMART); PF13465 (PFAM); IPR013087 (G3DSA:3.30.160.GENE3D); IPR013087 (G3DSA:3.30.160.GENE3D); PTHR24409:SF14 (PANTHER); PTHR24409 (PANTHER); IPR007087 (PROSITE_PATTERNS); IPR007087 (PROSITE_PATTERNS); IPR007087 (PROSITE_PROFILES); IPR007087 (PROSITE_PROFILES); SSF57667 (SUPERFAMILY)                                                                                                                                                                                                                                                                                                                                                                                                                                                                                                                                    |
| 810 | c25811_g1_i1_len_760_path_927_0_323_514_32_4_759_2                                               | 17   | sortilin-related receptor                              | 253 | 7.03E-07  | 58.67% | 0.872 Y | IPR002172 (SMART); IPR002172 (G3DSA:4.10.400.GENE3D); IPR002172 (PFAM); IPR023415 (PROSITE_PATTERNS); CYTOPLASMIC_DOMAIN (PHOBIUS); NON_CYTOPLASMIC_DOMAIN (PHOBIUS); TRANSMEMBRANE (PHOBIUS); NON_CYTOPLASMIC_DOMAIN (PHOBIUS); TRANSMEMBRANE (PHOBIUS); IPR002172 (PROSITE_PROFILES); SignalP-noTM (SIGNALP_EUK); IPR002172 (SUPERFAMILY); TMhelix (TMHMM); TMhelix (TMHMM)                                                                                                                                                                                                                                                                                                                                                                                                                                                             |
| 811 | c25811_g1_i2_len_491_path_927_0_323_1248_3_24_439_1364_440_490_2                                 | 24   | suppressor of tumorigenicity 14 protein                | 163 | 1.65E-12  | 50.30% | 0.872 Y | IPR002172 (SMART); IPR002172 (PFAM); G3DSA:2.40.10.10 (GENE3D); IPR002172 (G3DSA:4.10.400.GENE3D); PTHR24256:SF20 (PANTHER); PTHR24256 (PANTHER); IPR023415 (PROSITE_PATTERNS); CYTOPLASMIC_DOMAIN (PHOBIUS); TRANSMEMBRANE (PHOBIUS); NON_CYTOPLASMIC_DOMAIN (PHOBIUS); IPR002172 (PROSITE_PROFILES); SignalP-noTM (SIGNALP_EUK); IPR009003 (SUPERFAMILY); IPR002172 (SUPERFAMILY)                                                                                                                                                                                                                                                                                                                                                                                                                                                       |
| 812 | c25812_g1_i1_len_1601_path_53_0_1600_2                                                           | 131  | insulin-like growth factor-binding protein 7 precursor | 533 | 6.49E-73  | 59.10% | 0.480 Y | IPR003598 (SMART); IPR002350 (SMART); IPR003599 (SMART); IPR000867 (SMART); IPR000867 (PFAM); IPR002350 (PFAM); IPR013098 (PFAM); IPR013783 (G3DSA:2.60.40.GENE3D); G3DSA:3.30.60.30 (GENE3D); IPR011390 (PANTHER); PTHR14186:SF9 (PANTHER); SIGNAL_PEPTIDE_H_REGION (PHOBIUS); TRANSMEMBRANE (PHOBIUS); CYTOPLASMIC_DOMAIN (PHOBIUS); TRANSMEMBRANE (PHOBIUS); CYTOPLASMIC_DOMAIN (PHOBIUS); SIGNAL_PEPTIDE (PHOBIUS); SIGNAL_PEPTIDE_C_REGION (PHOBIUS); TRANSMEMBRANE (PHOBIUS); NON_CYTOPLASMIC_DOMAIN (PHOBIUS); SIGNAL_PEPTIDE_N_REGION (PHOBIUS); NON_CYTOPLASMIC_DOMAIN (PHOBIUS); TRANSMEMBRANE (PHOBIUS); IPR007110 (PROSITE_PROFILES); IPR002350 (PROSITE_PROFILES); IPR000867 (PROSITE_PROFILES); SSF48726 (SUPERFAMILY); IPR009030 (SUPERFAMILY); SSF100895 (SUPERFAMILY); TMhelix (TMHMM); TMhelix (TMHMM); TMhelix (TMHMM) |
| 813 | c25846_g3_i2_len_294_path_2033_0_122_2156_123_293_4                                              | 0    | hypothetical protein Y032_0089g2326                    | 98  | 2.26E-07  | 62.50% | 0.104   | IPR011991 (G3DSA:1.10.10.GENE3D)                                                                                                                                                                                                                                                                                                                                                                                                                                                                                                                                                                                                                                                                                                                                                                                                          |
| 814 | c25868_g1_i1_len_1223_path_2648_0_18_14_19_73_2402_74_202_69_203_900_2579_901_902_771_903_1222_0 | 130  | adp-ribosylation factor-like protein 16                | 408 | 2.89E-40  | 67.90% | 0.127   | IPR006689 (PRINTS); IPR024156 (SMART); IPR006687 (SMART); IPR027417 (G3DSA:3.40.50.GENE3D); IPR006689 (PFAM); PTHR11711:SF42 (PANTHER); PTHR11711 (PANTHER); TRANSMEMBRANE (PHOBIUS); NON_CYTOPLASMIC_DOMAIN (PHOBIUS); NON_CYTOPLASMIC_DOMAIN (PHOBIUS); TRANSMEMBRANE (PHOBIUS); CYTOPLASMIC_DOMAIN (PHOBIUS); CYTOPLASMIC_DOMAIN (PHOBIUS); NON_CYTOPLASMIC_DOMAIN (PHOBIUS); TRANSMEMBRANE (PHOBIUS); IPR024156 (PROSITE_PROFILES); IPR027417 (SUPERFAMILY); TMhelix (TMHMM); TMhelix (TMHMM); TMhelix (TMHMM); TMhelix (TMHMM)                                                                                                                                                                                                                                                                                                       |

|     |                                                                                                        |     |                                                |      |          |        |       |                                                                                                                                                                                                                                                                                                                                                                                                                                                                                                                                                                                                                   |
|-----|--------------------------------------------------------------------------------------------------------|-----|------------------------------------------------|------|----------|--------|-------|-------------------------------------------------------------------------------------------------------------------------------------------------------------------------------------------------------------------------------------------------------------------------------------------------------------------------------------------------------------------------------------------------------------------------------------------------------------------------------------------------------------------------------------------------------------------------------------------------------------------|
| 815 | c25868_g1_i2_len_1090_path_1_0_12_14_13_67_69_68_765_767_766_769_771_770_1089_0                        | 153 | adp-ribosylation factor-like protein 16        | 364  | 8.18E-41 | 67.70% | 0.114 | IPR006689 (PRINTS); IPR006687 (SMART); IPR024156 (SMART); IPR006689 (PFAM); IPR027417 (G3DSA:3.40.50.GENE3D); PTHR11711 (PANTHER); PTHR11711:SF42 (PANTHER); TRANSMEMBRANE (PHOBIUS); CYTOPLASMIC_DOMAIN (PHOBIUS); NON_CYTOPLASMIC_DOMAIN (PHOBIUS); NON_CYTOPLASMIC_DOMAIN (PHOBIUS); TRANSMEMBRANE (PHOBIUS); CYTOPLASMIC_DOMAIN (PHOBIUS); TRANSMEMBRANE (PHOBIUS); IPR024156 (PROSITE_PROFILES); IPR027417 (SUPERFAMILY); TMhelix (TMHMM); TMhelix (TMHMM); TMhelix (TMHMM); TMhelix (TMHMM)                                                                                                                 |
| 816 | c25879_g1_i1_len_1421_path_6765_0_97_1962_98_1420_5                                                    | 26  | agap000560-pa-like protein                     | 473  | 0        | 74.20% | 0.102 | IPR003593 (SMART); IPR003959 (PFAM); IPR027417 (G3DSA:3.40.50.GENE3D); PTHR23076 (PANTHER); PTHR23076:SF47 (PANTHER); TRANSMEMBRANE (PHOBIUS); TRANSMEMBRANE (PHOBIUS); CYTOPLASMIC_DOMAIN (PHOBIUS); NON_CYTOPLASMIC_DOMAIN (PHOBIUS); CYTOPLASMIC_DOMAIN (PHOBIUS); IPR027417 (SUPERFAMILY); TMhelix (TMHMM)                                                                                                                                                                                                                                                                                                    |
| 817 | c25879_g1_i2_len_3284_path_1_0_1960_1962_1_961_3283_5                                                  | 398 | agap000560-pa-like protein                     | 1094 | 0        | 77.80% | 0.102 | IPR003593 (SMART); G3DSA:1.10.8.60 (GENE3D); IPR003959 (PFAM); IPR027417 (G3DSA:3.40.50.GENE3D); IPR000642 (PFAM); IPR005936 (TIGRFAM); PTHR23076 (PANTHER); PTHR23076:SF47 (PANTHER); TRANSMEMBRANE (PHOBIUS); CYTOPLASMIC_DOMAIN (PHOBIUS); CYTOPLASMIC_DOMAIN (PHOBIUS); NON_CYTOPLASMIC_DOMAIN (PHOBIUS); TRANSMEMBRANE (PHOBIUS); NON_CYTOPLASMIC_DOMAIN (PHOBIUS); CYTOPLASMIC_DOMAIN (PHOBIUS); NON_CYTOPLASMIC_DOMAIN (PHOBIUS); TRANSMEMBRANE (PHOBIUS); TRANSMEMBRANE (PHOBIUS); IPR005936 (HAMAP); SSF140990 (SUPERFAMILY); IPR027417 (SUPERFAMILY); TMhelix (TMHMM); TMhelix (TMHMM); TMhelix (TMHMM) |
| 818 | c25894_g1_i1_len_493_path_4516_0_84_1707_8_5_205_1828_206_231_4100_232_466_1828_467_492_1              | 12  | zinc finger protein                            | 164  | 6.09E-29 | 56.30% | 0.103 | IPR015880 (SMART); IPR013087 (G3DSA:3.30.160.GENE3D); PF13465 (PFAM); IPR007087 (PFAM); IPR013087 (G3DSA:3.30.160.GENE3D); PTHR24409:SF14 (PANTHER); PTHR24409 (PANTHER); IPR007087 (PROSITE_PATTERNS); IPR007087 (PROSITE_PATTERNS); IPR007087 (PROSITE_PATTERNS); IPR007087 (PROSITE_PATTERNS); IPR007087 (PROSITE_PROFILES); IPR007087 (PROSITE_PROFILES); IPR007087 (PROSITE_PROFILES); IPR007087 (PROSITE_PROFILES); SSF57667 (SUPERFAMILY); SSF57667 (SUPERFAMILY); SSF57667 (SUPERFAMILY)                                                                                                                  |
| 819 | c25894_g3_i1_len_788_path_2075_0_98_2174_9_9_100_2176_101_138_2214_139_173_2248_174_634_2709_635_706_0 | 50  | zinc finger protein xfin-like isoform x1       | 263  | 3.57E-16 | 60.50% | 0.109 | IPR015880 (SMART); IPR013087 (G3DSA:3.30.160.GENE3D); IPR007087 (PFAM); IPR013087 (G3DSA:3.30.160.GENE3D); PF13894 (PFAM); PTHR24409 (PANTHER); IPR007087 (PROSITE_PATTERNS); IPR007087 (PROSITE_PATTERNS); IPR007087 (PROSITE_PATTERNS); IPR007087 (PROSITE_PROFILES); IPR007087 (PROSITE_PROFILES); IPR007087 (PROSITE_PROFILES); SSF57667 (SUPERFAMILY); SSF57667 (SUPERFAMILY)                                                                                                                                                                                                                                |
| 820 | c25894_g3_i2_len_884_path_2075_0_98_2174_9_9_100_2176_101_138_2214_139_173_2248_174_634_2709_635_706_0 | 59  | zinc finger protein xfin-like isoform x1       | 289  | 7.22E-16 | 60.20% | 0.109 | IPR015880 (SMART); IPR007087 (PFAM); PF13894 (PFAM); IPR013087 (G3DSA:3.30.160.GENE3D); IPR013087 (G3DSA:3.30.160.GENE3D); PTHR24409 (PANTHER); IPR007087 (PROSITE_PATTERNS); IPR007087 (PROSITE_PATTERNS); IPR007087 (PROSITE_PATTERNS); IPR007087 (PROSITE_PROFILES); IPR007087 (PROSITE_PROFILES); IPR007087 (PROSITE_PROFILES); SSF57667 (SUPERFAMILY); SSF57667 (SUPERFAMILY); TMhelix (TMHMM)                                                                                                                                                                                                               |
| 821 | c25919_g1_i1_len_1216_path_1270_0_173_2992_174_175_1446_176_295_3007_296_303_1574_304_304_1575_305_2   | 338 | mitochondrial acyl carrier protein 1 isoform b | 393  | 1.37E-44 | 66.60% | 0.225 | IPR009081 (PFAM); IPR009081 (G3DSA:1.10.1200.GENE3D); PTHR20863:SF5 (PANTHER); PTHR20863 (PANTHER); TRANSMEMBRANE (PHOBIUS); NON_CYTOPLASMIC_DOMAIN (PHOBIUS); CYTOPLASMIC_DOMAIN (PHOBIUS); IPR003231 (PRODOM); IPR003231 (HAMAP); IPR009081 (PROSITE_PROFILES); IPR009081 (SUPERFAMILY)                                                                                                                                                                                                                                                                                                                         |
| 822 | c25919_g1_i2_len_1292_path_1270_0_173_2992_174_175_1446_176_295_3007_296_303_1574_304_304_1575_305_2   | 605 | mitochondrial acyl carrier protein 1 isoform b | 419  | 6.66E-48 | 67.90% | 0.225 | IPR009081 (G3DSA:1.10.1200.GENE3D); IPR009081 (PFAM); PTHR20863 (PANTHER); PTHR20863:SF5 (PANTHER); NON_CYTOPLASMIC_DOMAIN (PHOBIUS); CYTOPLASMIC_DOMAIN (PHOBIUS); NON_CYTOPLASMIC_DOMAIN (PHOBIUS); TRANSMEMBRANE (PHOBIUS); TRANSMEMBRANE (PHOBIUS); IPR003231 (PRODOM); IPR003231 (HAMAP); IPR009081 (PROSITE_PROFILES); IPR009081 (SUPERFAMILY); TMhelix (TMHMM); TMhelix (TMHMM)                                                                                                                                                                                                                            |



|     |                                                                                                      |        |                                                           |     |           |        |         |                                                                                                                                                                                                                                                                                                                                                                                                                                                                                                                                                                                                                                                                                                                                                                                                                                                 |
|-----|------------------------------------------------------------------------------------------------------|--------|-----------------------------------------------------------|-----|-----------|--------|---------|-------------------------------------------------------------------------------------------------------------------------------------------------------------------------------------------------------------------------------------------------------------------------------------------------------------------------------------------------------------------------------------------------------------------------------------------------------------------------------------------------------------------------------------------------------------------------------------------------------------------------------------------------------------------------------------------------------------------------------------------------------------------------------------------------------------------------------------------------|
| 823 | c25919_g1_i3_len_1283_path_1270_0_173_2992_174_175_2608_176_286_3007_287_294_1574_295_295_1575_296_2 | 508    | nadh dehydrogenase isoform 1                              | 416 | 1.16E-49  | 76.60% | 0.223   | IPR009081 (PFAM); IPR009081 (G3DSA:1.10.1200.GENE3D); PTHR20863:SF5 (PANTHER); PTHR20863 (PANTHER); NON_CYTOPLASMIC_DOMAIN (PHOBIUS); NON_CYTOPLASMIC_DOMAIN (PHOBIUS); TRANSMEMBRANE (PHOBIUS); TRANSMEMBRANE (PHOBIUS); CYTOPLASMIC_DOMAIN (PHOBIUS); IPR003231 (PRODOM); IPR003231 (HAMAP); IPR009081 (PROSITE_PROFILES); IPR009081 (SUPERFAMILY); TMhelix (TMHMM); TMhelix (TMHMM)                                                                                                                                                                                                                                                                                                                                                                                                                                                          |
| 824 | c25936_g1_i1_len_1508_path_1507_0_507_2014_508_509_13_510_1380_3006_1381_1383_288_6_1384_1507_0      | 104    | stereocilin                                               | 503 | 5.32E-18  | 46.60% | 0.099   | IPR026061 (PTHR23412:PANTHER); IPR026664 (PANTHER); TRANSMEMBRANE (PHOBIUS); CYTOPLASMIC_DOMAIN (PHOBIUS); NON_CYTOPLASMIC_DOMAIN (PHOBIUS); TMhelix (TMHMM)                                                                                                                                                                                                                                                                                                                                                                                                                                                                                                                                                                                                                                                                                    |
| 825 | c25959_g1_i1_len_390_path_1563_0_389_1                                                               | 161    | transmembrane protease serine 11d-like isoform 2          | 124 | 2.90E-06  | 59.00% | 0.16    | IPR001254 (PFAM); G3DSA:2.40.10.10 (GENE3D); IPR009003 (SUPERFAMILY)                                                                                                                                                                                                                                                                                                                                                                                                                                                                                                                                                                                                                                                                                                                                                                            |
| 826 | c25959_g2_i1_len_522_path_500_0_521_1                                                                | 424    | coagulation factor xi                                     | 174 | 7.48E-28  | 54.90% | 0.466 Y | IPR001314 (PRINTS); IPR001254 (SMART); IPR001254 (PFAM); G3DSA:2.40.10.10 (GENE3D); G3DSA:2.40.10.10 (GENE3D); PTHR24260 (PANTHER); IPR018114 (PROSITE_PATTERNS); IPR001254 (PROSITE_PROFILES); SignalP-noTM (SIGNALP_EUK); IPR009003 (SUPERFAMILY)                                                                                                                                                                                                                                                                                                                                                                                                                                                                                                                                                                                             |
| 827 | c25966_g1_i1_len_831_path_1001_0_830_5                                                               | 3766   | isoform a                                                 | 271 | 1.25E-33  | 55.30% | 0.12    | IPR001314 (PRINTS); IPR001254 (SMART); G3DSA:2.40.10.10 (GENE3D); IPR001254 (PFAM); G3DSA:2.40.10.10 (GENE3D); PTHR24260 (PANTHER); IPR018114 (PROSITE_PATTERNS); IPR018114 (PROSITE_PATTERNS); IPR001254 (PROSITE_PROFILES); IPR009003 (SUPERFAMILY)                                                                                                                                                                                                                                                                                                                                                                                                                                                                                                                                                                                           |
| 828 | c25966_g2_i1_len_438_path_416_0_50_467_51_52_469_53_437_0                                            | 1015   | transmembrane protease serine 9                           | 146 | 2.64E-07  | 44.60% | 0.22    | IPR001254 (PFAM); G3DSA:2.40.10.10 (GENE3D); NON_CYTOPLASMIC_DOMAIN (PHOBIUS); CYTOPLASMIC_DOMAIN (PHOBIUS); TRANSMEMBRANE (PHOBIUS); IPR009003 (SUPERFAMILY)                                                                                                                                                                                                                                                                                                                                                                                                                                                                                                                                                                                                                                                                                   |
| 829 | c25996_g1_i1_len_1410_path_1388_0_264_1653_265_274_1663_275_1222_2611_1223_1265_26_54_1266_1409_1    | 488359 | suppressor of tumorigenicity 14 protein homolog           | 462 | 6.09E-43  | 50.10% | 0.731 Y | IPR001314 (PRINTS); IPR002172 (SMART); IPR001254 (SMART); IPR001254 (PFAM); G3DSA:2.40.10.10 (GENE3D); IPR002172 (G3DSA:4.10.400.GENE3D); G3DSA:2.40.10.10 (GENE3D); G3DSA:2.40.10.10 (GENE3D); IPR002172 (PFAM); PTHR24256 (PANTHER); IPR023415 (PROSITE_PATTERNS); IPR018114 (PROSITE_PATTERNS); CYTOPLASMIC_DOMAIN (PHOBIUS); NON_CYTOPLASMIC_DOMAIN (PHOBIUS); TRANSMEMBRANE (PHOBIUS); IPR002172 (PROSITE_PROFILES); IPR001254 (PROSITE_PROFILES); SignalP-noTM (SIGNALP_EUK); IPR009003 (SUPERFAMILY); IPR002172 (SUPERFAMILY)                                                                                                                                                                                                                                                                                                            |
| 830 | c26026_g2_i2_len_1815_path_1743_0_554_2298_555_1417_6762_1418_1814_0                                 | 482    | kunitz bovine pancreatic trypsin inhibitor domain protein | 605 | 7.04E-47  | 61.60% | 0.105   | IPR002223 (PRINTS); IPR002223 (SMART); IPR002223 (G3DSA:4.10.410.GENE3D); IPR002223 (G3DSA:4.10.410.GENE3D); PTHR10083 (PANTHER); IPR020901 (PROSITE_PATTERNS); IPR020901 (PROSITE_PATTERNS); IPR020901 (PROSITE_PATTERNS); IPR002223 (PROSITE_PROFILES); IPR002223 (PROSITE_PROFILES); IPR002223 (SUPERFAMILY); IPR002223 (SUPERFAMILY); IPR002223 (SUPERFAMILY)                                                                                                                                                                                                                                                                                                                                                                                                                                                                               |
| 831 | c26041_g1_i1_len_1342_path_189_0_934_2911_935_959_100_960_1316_2931_1317_1341_0                      | 52     | abhydrolase domain-containing protein 2 isoform x1        | 442 | 1.22E-174 | 76.90% | 0.201   | IPR029058 (G3DSA:3.40.50.GENE3D); IPR000073 (PFAM); IPR012020 (PIRSF); PTHR10794:SF35 (PANTHER); PTHR10794 (PANTHER); TRANSMEMBRANE (PHOBIUS); CYTOPLASMIC_DOMAIN (PHOBIUS); NON_CYTOPLASMIC_DOMAIN (PHOBIUS); IPR029058 (SUPERFAMILY); TMhelix (TMHMM)                                                                                                                                                                                                                                                                                                                                                                                                                                                                                                                                                                                         |
| 832 | c26069_g2_i1_len_2718_path_2696_0_2396_509_3_2397_2401_7366_2402_2717_0                              | 150    | neuropeptides capa receptor-like                          | 900 | 3.40E-148 | 74.00% | 0.137   | Coil (COILS); IPR005390 (PRINTS); IPR000276 (PRINTS); IPR000276 (PFAM); G3DSA:1.20.1070.10 (GENE3D); PTHR24243:SF107 (PANTHER); PTHR24243 (PANTHER); IPR000276 (PROSITE_PATTERNS); CYTOPLASMIC_DOMAIN (PHOBIUS); TRANSMEMBRANE (PHOBIUS); TRANSMEMBRANE (PHOBIUS); TRANSMEMBRANE (PHOBIUS); TRANSMEMBRANE (PHOBIUS); CYTOPLASMIC_DOMAIN (PHOBIUS); CYTOPLASMIC_DOMAIN (PHOBIUS); NON_CYTOPLASMIC_DOMAIN (PHOBIUS); NON_CYTOPLASMIC_DOMAIN (PHOBIUS); CYTOPLASMIC_DOMAIN (PHOBIUS); TRANSMEMBRANE (PHOBIUS); TRANSMEMBRANE (PHOBIUS); TRANSMEMBRANE (PHOBIUS); NON_CYTOPLASMIC_DOMAIN (PHOBIUS); NON_CYTOPLASMIC_DOMAIN (PHOBIUS); IPR017452 (PROSITE_PROFILES); SSF81321 (SUPERFAMILY); TMhelix (TMHMM); TMhelix (TMHMM) |



|     |                                                                                         |      |                                                |     |           |        |       |                                                                                                                                                                                                                                                                                                                                                                                                                                                                                                                                                                                                                                                                                                                                                                                                                      |
|-----|-----------------------------------------------------------------------------------------|------|------------------------------------------------|-----|-----------|--------|-------|----------------------------------------------------------------------------------------------------------------------------------------------------------------------------------------------------------------------------------------------------------------------------------------------------------------------------------------------------------------------------------------------------------------------------------------------------------------------------------------------------------------------------------------------------------------------------------------------------------------------------------------------------------------------------------------------------------------------------------------------------------------------------------------------------------------------|
| 843 | c26292_g1_i1_len_882_path_952_0_105_1057_1<br>06_287_96_288_840_1789_841_881_1          | 60   | adp-ribosylation factor-like protein 2         | 294 | 1.20E-109 | 93.70% | 0.2   | IPR006689 (PRINTS); IPR003579 (SMART); IPR006687 (SMART); IPR024156 (SMART); IPR006689 (PFAM); IPR005225 (TIGRFAM); IPR027417 (G3DSA:3.40.50.GENE3D); PTHR11711:SF26 (PANTHER); PTHR11711 (PANTHER); CYTOPLASMIC_DOMAIN (PHOBIUS); TRANSMEMBRANE (PHOBIUS); NON_CYTOPLASMIC_DOMAIN (PHOBIUS); IPR024156 (PROSITE_PROFILES); IPR027417 (SUPERFAMILY); TMhelix (TMHMM)                                                                                                                                                                                                                                                                                                                                                                                                                                                 |
| 844 | c26292_g1_i2_len_700_path_952_0_105_96_106_658_1789_659_699_2                           | 26   | adp-ribosylation factor-like protein 2         | 233 | 2.26E-69  | 91.40% | 0.1   | IPR006689 (PRINTS); IPR024156 (SMART); IPR027417 (G3DSA:3.40.50.GENE3D); IPR006689 (PFAM); PTHR11711 (PANTHER); PTHR11711:SF26 (PANTHER); IPR024156 (PROSITE_PROFILES); IPR027417 (SUPERFAMILY)                                                                                                                                                                                                                                                                                                                                                                                                                                                                                                                                                                                                                      |
| 845 | c26332_g1_i1_len_972_path_2326_0_154_221_155_949_2544_950_971_2                         | 228  | isoamyl acetate-hydrolyzing esterase 1 homolog | 318 | 6.23E-65  | 65.00% | 0.228 | PF13472 (PFAM); IPR013830 (G3DSA:3.40.50.GENE3D); PTHR14209 (PANTHER); IPR013830 (SUPERFAMILY)                                                                                                                                                                                                                                                                                                                                                                                                                                                                                                                                                                                                                                                                                                                       |
| 846 | c26332_g1_i2_len_1037_path_1_0_219_221_22_0_1014_2544_1015_1036_1                       | 300  | isoamyl acetate-hydrolyzing esterase 1 homolog | 340 | 1.97E-73  | 65.70% | 0.119 | IPR013830 (G3DSA:3.40.50.GENE3D); IPR001087 (PFAM); PTHR14209 (PANTHER); IPR013830 (SUPERFAMILY)                                                                                                                                                                                                                                                                                                                                                                                                                                                                                                                                                                                                                                                                                                                     |
| 847 | c26347_g1_i1_len_2383_path_2559_0_2045_480_3_2046_2382_3                                | 134  | Glucosylceramidase                             | 795 | 1.53E-161 | 68.80% | 0.126 | IPR001139 (PRINTS); IPR013780 (G3DSA:2.60.40.GENE3D); IPR001139 (PFAM); IPR013781 (G3DSA:3.20.20.GENE3D); IPR001139 (PANTHER); PTHR11069:SF7 (PANTHER); TRANSMEMBRANE (PHOBIUS); CYTOPLASMIC_DOMAIN (PHOBIUS); TRANSMEMBRANE (PHOBIUS); NON_CYTOPLASMIC_DOMAIN (PHOBIUS); CYTOPLASMIC_DOMAIN (PHOBIUS); TRANSMEMBRANE (PHOBIUS); NON_CYTOPLASMIC_DOMAIN (PHOBIUS); IPR017853 (SUPERFAMILY)                                                                                                                                                                                                                                                                                                                                                                                                                           |
| 848 | c26347_g1_i2_len_2581_path_2559_0_2045_460_5_2046_2243_4803_2244_2580_3                 | 176  | glucosylceramidase-like                        | 861 | 5.39E-180 | 66.20% | 0.126 | IPR001139 (PRINTS); IPR013780 (G3DSA:2.60.40.GENE3D); IPR001139 (PFAM); IPR013781 (G3DSA:3.20.20.GENE3D); IPR001139 (PANTHER); PTHR11069:SF7 (PANTHER); CYTOPLASMIC_DOMAIN (PHOBIUS); NON_CYTOPLASMIC_DOMAIN (PHOBIUS); TRANSMEMBRANE (PHOBIUS); TRANSMEMBRANE (PHOBIUS); CYTOPLASMIC_DOMAIN (PHOBIUS); NON_CYTOPLASMIC_DOMAIN (PHOBIUS); IPR017853 (SUPERFAMILY); SSF51011 (SUPERFAMILY)                                                                                                                                                                                                                                                                                                                                                                                                                            |
| 849 | c26353_g1_i1_len_2323_path_2779_0_2322_4                                                | 1095 | pdgf- and vegf-related factor 1-like precursor | 769 | 5.26E-53  | 55.80% | 0.309 | IPR000072 (SMART); IPR029034 (G3DSA:2.10.90.GENE3D); IPR000072 (PFAM); PTHR11633:SF1 (PANTHER); PTHR11633 (PANTHER); TRANSMEMBRANE (PHOBIUS); CYTOPLASMIC_DOMAIN (PHOBIUS); NON_CYTOPLASMIC_DOMAIN (PHOBIUS); SIGNAL_PEPTIDE_N_REGION (PHOBIUS); SIGNAL_PEPTIDE_H_REGION (PHOBIUS); CYTOPLASMIC_DOMAIN (PHOBIUS); SIGNAL_PEPTIDE (PHOBIUS); NON_CYTOPLASMIC_DOMAIN (PHOBIUS); TRANSMEMBRANE (PHOBIUS); SIGNAL_PEPTIDE_C_REGION (PHOBIUS); TRANSMEMBRANE (PHOBIUS); IPR000072 (PROSITE_PROFILES); IPR029034 (SUPERFAMILY); TMhelix (TMHMM); TMhelix (TMHMM); TMhelix (TMHMM)                                                                                                                                                                                                                                          |
| 850 | c26358_g2_i1_len_1506_path_53_0_1505_1                                                  | 5106 | serpin 3                                       | 502 | 1.15E-98  | 63.50% | 0.127 | IPR023796 (SMART); G3DSA:2.30.39.10 (GENE3D); IPR023796 (PFAM); G3DSA:3.30.497.10 (GENE3D); IPR000215 (PANTHER); IPR023795 (PROSITE_PATTERNS); TRANSMEMBRANE (PHOBIUS); CYTOPLASMIC_DOMAIN (PHOBIUS); NON_CYTOPLASMIC_DOMAIN (PHOBIUS); IPR023796 (SUPERFAMILY)                                                                                                                                                                                                                                                                                                                                                                                                                                                                                                                                                      |
| 851 | c26368_g1_i1_len_1947_path_221_0_214_435_2_15_216_220_217_893_23_894_929_59_930_19_46_2 | 244  | protein shifted isoform x1                     | 649 | 0         | 81.10% | 0.145 | IPR013309 (PRINTS); IPR003306 (SMART); IPR000742 (SMART); IPR003306 (PFAM); G3DSA:2.10.25.10 (GENE3D); G3DSA:2.10.25.10 (GENE3D); IPR013032 (PFAM); PTHR24838 (PANTHER); PTHR24838:SF276 (PANTHER); IPR013032 (PROSITE_PATTERNS); TRANSMEMBRANE (PHOBIUS); NON_CYTOPLASMIC_DOMAIN (PHOBIUS); CYTOPLASMIC_DOMAIN (PHOBIUS); IPR003306 (PRODOM); IPR000742 (PROSITE_PROFILES); IPR003306 (PROSITE_PROFILES); IPR000742 (PROSITE_PROFILES); IPR000742 (PROSITE_PROFILES); IPR000742 (PROSITE_PROFILES); SSF57196 (SUPERFAMILY); SSF57196 (SUPERFAMILY); TMhelix (TMHMM) |

|     |                                                                                                               |      |                                      |      |           |        |       |                                                                                                                                                                                                                                                                                                                                                                                                                                                                                                                                                                                                                                                                                                                                                                                                                           |
|-----|---------------------------------------------------------------------------------------------------------------|------|--------------------------------------|------|-----------|--------|-------|---------------------------------------------------------------------------------------------------------------------------------------------------------------------------------------------------------------------------------------------------------------------------------------------------------------------------------------------------------------------------------------------------------------------------------------------------------------------------------------------------------------------------------------------------------------------------------------------------------------------------------------------------------------------------------------------------------------------------------------------------------------------------------------------------------------------------|
| 852 | c26368_g1_i2_len_1911_path_221_0_214_435_2<br>15_216_220_217_893_59_894_1910_2                                | 240  | wnt inhibitory factor 1              | 637  | 0         | 82.70% | 0.145 | IPR013309 (PRINTS); IPR000742 (SMART); IPR003306 (SMART); IPR003306 (PFAM); IPR013032 (PFAM); G3DSA:2.170.300.10 (GENE3D); PTHR24838:SF276 (PANTHER); PTHR24838 (PANTHER); IPR013032 (PROSITE_PATTERNS); NON_CYTOPLASMIC_DOMAIN (PHOBIUS); CYTOPLASMIC_DOMAIN (PHOBIUS); TRANSMEMBRANE (PHOBIUS); IPR003306 (PRODOM); IPR000742 (PROSITE_PROFILES); IPR000742 (PROSITE_PROFILES); IPR000742 (PROSITE_PROFILES); IPR003306 (PROSITE_PROFILES); IPR000742 (PROSITE_PROFILES); IPR000742 (PROSITE_PROFILES); SSF57196 (SUPERFAMILY); SSF57196 (SUPERFAMILY); TMhelix (TMHMM) |
| 853 | c26405_g1_i1_len_1887_path_2194_0_1208_340<br>1_1209_1325_3515_1326_1886_5                                    | 271  | low quality protein: hemocytin-like  | 621  | 4.77E-75  | 53.50% | 0.114 | IPR006207 (SMART); IPR006208 (PFAM); PTHR11339:SF229 (PANTHER); PTHR11339 (PANTHER); TRANSMEMBRANE (PHOBIUS); TRANSMEMBRANE (PHOBIUS); CYTOPLASMIC_DOMAIN (PHOBIUS); NON_CYTOPLASMIC_DOMAIN (PHOBIUS); CYTOPLASMIC_DOMAIN (PHOBIUS); NON_CYTOPLASMIC_DOMAIN (PHOBIUS); TRANSMEMBRANE (PHOBIUS); CYTOPLASMIC_DOMAIN (PHOBIUS); CYTOPLASMIC_DOMAIN (PHOBIUS); IPR006207 (PROSITE_PROFILES); SSF57603 (SUPERFAMILY); SSF57603 (SUPERFAMILY)                                                                                                                                                                                                                                                                                                                                                                                  |
| 854 | c26409_g1_i1_len_1346_path_409_0_283_692_2<br>84_462_204_463_1345_5                                           | 4475 | annexin b10-like                     | 443  | 2.72E-117 | 70.90% | 0.119 | IPR001464 (PRINTS); IPR018502 (SMART); IPR018502 (G3DSA:1.10.220.GENE3D); IPR018502 (G3DSA:1.10.220.GENE3D); IPR018502 (PFAM); IPR018502 (G3DSA:1.10.220.GENE3D); PTHR10502 (PANTHER); IPR018252 (PROSITE_PATTERNS); IPR018252 (PROSITE_PATTERNS); CYTOPLASMIC_DOMAIN (PHOBIUS); TRANSMEMBRANE (PHOBIUS); CYTOPLASMIC_DOMAIN (PHOBIUS); NON_CYTOPLASMIC_DOMAIN (PHOBIUS); TRANSMEMBRANE (PHOBIUS); SSF47874 (SUPERFAMILY)                                                                                                                                                                                                                                                                                                                                                                                                 |
| 855 | c26409_g1_i2_len_1346_path_409_0_283_25_28<br>4_462_204_463_1345_5                                            | 2818 | annexin b10-like                     | 443  | 3.82E-116 | 71.10% | 0.119 | Coil (COILS); IPR001464 (PRINTS); IPR018502 (SMART); IPR018502 (G3DSA:1.10.220.GENE3D); IPR018502 (G3DSA:1.10.220.GENE3D); IPR018502 (G3DSA:1.10.220.GENE3D); IPR018502 (PFAM); IPR018502 (G3DSA:1.10.220.GENE3D); PTHR10502 (PANTHER); IPR018252 (PROSITE_PATTERNS); IPR018252 (PROSITE_PATTERNS); CYTOPLASMIC_DOMAIN (PHOBIUS); NON_CYTOPLASMIC_DOMAIN (PHOBIUS); TRANSMEMBRANE (PHOBIUS); TRANSMEMBRANE (PHOBIUS); CYTOPLASMIC_DOMAIN (PHOBIUS); SSF47874 (SUPERFAMILY)                                                                                                                                                                                                                                                                                                                                                |
| 856 | c26423_g1_i1_len_2151_path_2129_0_411_2541<br>_412_413_2543_414_1353_3483_1354_1678_44<br>76_1679_1681_4479_2 | 227  | btb poz domain-containing protein 17 | 717  | 0         | 75.30% | 0.138 | IPR011705 (SMART); IPR000210 (SMART); IPR011705 (PFAM); IPR013069 (PFAM); G3DSA:3.30.710.10 (GENE3D); PTHR24410 (PANTHER); PTHR24410:SF9 (PANTHER); CYTOPLASMIC_DOMAIN (PHOBIUS); NON_CYTOPLASMIC_DOMAIN (PHOBIUS); TRANSMEMBRANE (PHOBIUS); IPR000210 (PROSITE_PROFILES); IPR011333 (SUPERFAMILY)                                                                                                                                                                                                                                                                                                                                                                                                                                                                                                                        |
| 857 | c26441_g1_i2_len_3192_path_691_0_1378_2068<br>_1379_1380_630_1381_2283_3914_2284_2287_<br>3920_2288_3191_2    | 520  | myotrophin-like isoform 2            | 1055 | 4.97E-52  | 84.20% | 0.141 | IPR002110 (SMART); IPR020683 (G3DSA:1.25.40.GENE3D); IPR020683 (PFAM); PTHR24152 (PANTHER); NON_CYTOPLASMIC_DOMAIN (PHOBIUS); NON_CYTOPLASMIC_DOMAIN (PHOBIUS); CYTOPLASMIC_DOMAIN (PHOBIUS); TRANSMEMBRANE (PHOBIUS); TRANSMEMBRANE (PHOBIUS); TRANSMEMBRANE (PHOBIUS); TRANSMEMBRANE (PHOBIUS); CYTOPLASMIC_DOMAIN (PHOBIUS); TRANSMEMBRANE (PHOBIUS); NON_CYTOPLASMIC_DOMAIN (PHOBIUS); TRANSMEMBRANE (PHOBIUS); NON_CYTOPLASMIC_DOMAIN (PHOBIUS); NON_CYTOPLASMIC_DOMAIN (PHOBIUS); TRANSMEMBRANE (PHOBIUS); CYTOPLASMIC_DOMAIN (PHOBIUS); CYTOPLASMIC_DOMAIN (PHOBIUS); IPR002110 (PROSITE_PROFILES); IPR020683 (PROSITE_PROFILES); IPR020683 (SUPERFAMILY); TMhelix (TMHMM); TMhelix (TMHMM)                                                                                                                        |

|     |                                                                                                        |      |                                                                                               |     |           |        |       |                                                                                                                                                                                                                                                                                                                                                                                                                                                        |
|-----|--------------------------------------------------------------------------------------------------------|------|-----------------------------------------------------------------------------------------------|-----|-----------|--------|-------|--------------------------------------------------------------------------------------------------------------------------------------------------------------------------------------------------------------------------------------------------------------------------------------------------------------------------------------------------------------------------------------------------------------------------------------------------------|
| 858 | c26472_g1_i1_len_2411_path_275_0_629_904_6_30_648_231_649_2333_2603_2334_2353_143_2354_2410_1          | 1334 | histone 1o                                                                                    | 804 | 7.16E-28  | 70.00% | 0.119 | IPR005819 (PRINTS); IPR005818 (SMART); IPR011991 (G3DSA:1.10.10.GENE3D); IPR005818 (PFAM); PTHR11467 (PANTHER); TRANSMEMBRANE (PHOBIUS); NON_CYTOPLASMIC_DOMAIN (PHOBIUS); TRANSMEMBRANE (PHOBIUS); CYTOPLASMIC_DOMAIN (PHOBIUS); NON_CYTOPLASMIC_DOMAIN (PHOBIUS); IPR005818 (PROSITE_PROFILES); SSF46785 (SUPERFAMILY); TMhelix (TMHMM); TMhelix (TMHMM); TMhelix (TMHMM)                                                                            |
| 859 | c26479_g1_i1_len_1692_path_105_0_1691_0                                                                | 52   | retinol dehydrogenase 13-like                                                                 | 564 | 3.21E-138 | 75.10% | 0.104 | IPR002347 (PRINTS); IPR016040 (G3DSA:3.40.50.GENE3D); IPR002198 (PFAM); PTHR24320:SF55 (PANTHER); PTHR24320 (PANTHER); TRANSMEMBRANE (PHOBIUS); NON_CYTOPLASMIC_DOMAIN (PHOBIUS); TRANSMEMBRANE (PHOBIUS); CYTOPLASMIC_DOMAIN (PHOBIUS); NON_CYTOPLASMIC_DOMAIN (PHOBIUS); SSF51735 (SUPERFAMILY); TMhelix (TMHMM); TMhelix (TMHMM)                                                                                                                    |
| 860 | c26487_g1_i1_len_2042_path_185_0_1245_164_1246_1918_144_1919_2041_2                                    | 189  | adp-dependent glucokinase-like                                                                | 680 | 0         | 71.30% | 0.226 | IPR007666 (PFAM); IPR029056 (G3DSA:3.40.1190.GENE3D); IPR007666 (PANTHER); PTHR21208:SF1 (PANTHER); TRANSMEMBRANE (PHOBIUS); CYTOPLASMIC_DOMAIN (PHOBIUS); NON_CYTOPLASMIC_DOMAIN (PHOBIUS); CYTOPLASMIC_DOMAIN (PHOBIUS); TRANSMEMBRANE (PHOBIUS); IPR007666 (PROSITE_PROFILES); IPR029056 (SUPERFAMILY); TMhelix (TMHMM); TMhelix (TMHMM)                                                                                                            |
| 861 | c26493_g1_i2_len_890_path_2208_0_793_174_7_94_889_1                                                    | 22   | insulin-like growth factor-binding protein 2-b-like                                           | 297 | 5.52E-25  | 66.50% | 0.11  | IPR000867 (SMART); IPR000867 (PFAM); IPR011390 (PANTHER); PTHR14186:SF8 (PANTHER); CYTOPLASMIC_DOMAIN (PHOBIUS); NON_CYTOPLASMIC_DOMAIN (PHOBIUS); TRANSMEMBRANE (PHOBIUS); TRANSMEMBRANE (PHOBIUS); CYTOPLASMIC_DOMAIN (PHOBIUS); IPR000867 (PROSITE_PROFILES); IPR009030 (SUPERFAMILY); TMhelix (TMHMM); TMhelix (TMHMM)                                                                                                                             |
| 862 | c26493_g1_i3_len_1692_path_2208_0_793_3001_794_899_3402_900_1691_1                                     | 123  | cysteine-rich motor neuron 1                                                                  | 556 | 3.58E-66  | 62.00% | 0.11  | Coil (COILS); IPR000867 (SMART); IPR000867 (PFAM); PTHR14186:SF8 (PANTHER); IPR011390 (PANTHER); TRANSMEMBRANE (PHOBIUS); CYTOPLASMIC_DOMAIN (PHOBIUS); NON_CYTOPLASMIC_DOMAIN (PHOBIUS); IPR000867 (PROSITE_PROFILES); IPR009030 (SUPERFAMILY)                                                                                                                                                                                                        |
| 863 | c26516_g1_i1_len_2373_path_2547_0_1484_403_1_1485_1499_88_1500_1531_4076_1532_1533_180_1534_1674_421_0 | 157  | vacuolar protein sorting-associated protein 4a-like                                           | 791 | 0         | 88.00% | 0.183 | IPR003593 (SMART); IPR007330 (SMART); IPR015415 (PFAM); IPR027417 (G3DSA:3.40.50.GENE3D); IPR007330 (PFAM); IPR007330 (G3DSA:1.20.58.GENE3D); G3DSA:1.10.8.60 (GENE3D); IPR003959 (PFAM); PTHR23074 (PANTHER); PTHR23074:SF72 (PANTHER); IPR003960 (PROSITE_PATTERNS); NON_CYTOPLASMIC_DOMAIN (PHOBIUS); TRANSMEMBRANE (PHOBIUS); CYTOPLASMIC_DOMAIN (PHOBIUS); IPR027417 (SUPERFAMILY); IPR007330 (SUPERFAMILY)                                       |
| 864 | c26537_g1_i1_len_1057_path_1802_0_741_329_742_870_2670_871_875_2675_876_923_2722_9_24_942_694_943_10_2 | 22   | hyaluronidase precursor                                                                       | 352 | 1.07E-76  | 59.10% | 0.258 | Coil (COILS); IPR018155 (PRINTS); IPR001329 (PRINTS); IPR018155 (PFAM); IPR018155 (PIRSF); IPR013785 (G3DSA:3.20.20.GENE3D); PTHR11769:SF8 (PANTHER); IPR018155 (PANTHER); TRANSMEMBRANE (PHOBIUS); CYTOPLASMIC_DOMAIN (PHOBIUS); NON_CYTOPLASMIC_DOMAIN (PHOBIUS); IPR017853 (SUPERFAMILY); TMhelix (TMHMM)                                                                                                                                           |
| 865 | c26537_g1_i2_len_477_path_53_0_275_329_276_404_2670_405_409_2675_410_457_2722_458_476_1                | 7    | putative hyaluronoglucosaminidase                                                             | 159 | 3.55E-07  | 55.00% | 0.18  | IPR013785 (G3DSA:3.20.20.GENE3D); IPR018155 (PFAM); IPR018155 (PANTHER); IPR017853 (SUPERFAMILY)                                                                                                                                                                                                                                                                                                                                                       |
| 866 | c26539_g1_i1_len_1433_path_4141_0_483_2733_484_1432_5                                                  | 47   | fas1_scham ame: full=fasciclin-1 ame: full=fasciclin i short=fas i short=fcn flags: precursor | 477 | 1.08E-84  | 64.90% | 0.099 | IPR000782 (SMART); IPR000782 (PFAM); IPR000782 (G3DSA:2.30.180.GENE3D); PTHR10900 (PANTHER); IPR000782 (PROSITE_PROFILES); IPR000782 (PROSITE_PROFILES); IPR000782 (SUPERFAMILY); IPR000782 (SUPERFAMILY)                                                                                                                                                                                                                                              |
| 867 | c26539_g1_i2_len_1782_path_1903_0_521_74_5_22_832_2733_833_1781_5                                      | 99   | fasciclin-1 isoform x2                                                                        | 587 | 5.29E-122 | 59.40% | 0.099 | IPR000782 (SMART); IPR000782 (G3DSA:2.30.180.GENE3D); IPR000782 (PFAM); PTHR10900 (PANTHER); CYTOPLASMIC_DOMAIN (PHOBIUS); TRANSMEMBRANE (PHOBIUS); NON_CYTOPLASMIC_DOMAIN (PHOBIUS); NON_CYTOPLASMIC_DOMAIN (PHOBIUS); TRANSMEMBRANE (PHOBIUS); IPR000782 (PROSITE_PROFILES); IPR000782 (PROSITE_PROFILES); IPR000782 (PROSITE_PROFILES); IPR000782 (SUPERFAMILY); IPR000782 (SUPERFAMILY); IPR000782 (SUPERFAMILY); TMhelix (TMHMM); TMhelix (TMHMM) |
| 868 | c26539_g1_i3_len_1281_path_53_0_20_74_21_3_31_2733_332_1280_5                                          | 39   | fas1_scham ame: full=fasciclin-1 ame: full=fasciclin i short=fas i short=fcn flags: precursor | 427 | 1.68E-107 | 62.90% | 0.099 | IPR000782 (SMART); IPR000782 (G3DSA:2.30.180.GENE3D); IPR000782 (PFAM); PTHR10900 (PANTHER); IPR000782 (PROSITE_PROFILES); IPR000782 (PROSITE_PROFILES); IPR000782 (PROSITE_PROFILES); IPR000782 (SUPERFAMILY); IPR000782 (SUPERFAMILY); IPR000782 (SUPERFAMILY)                                                                                                                                                                                       |
| 869 | c26550_g1_i1_len_932_path_111_0_838_71_839_845_78_846_909_2110_910_931_3                               | 60   | phospholipase a2 isozymes pa3a pa3b pa5                                                       | 311 | 4.11E-50  | 46.80% | 0.227 | IPR016090 (G3DSA:1.20.90.GENE3D); IPR001211 (PFAM); PTHR12253 (PANTHER); PTHR12253:SF8 (PANTHER); IPR016090 (SUPERFAMILY)                                                                                                                                                                                                                                                                                                                              |



|     |                                                                                                     |      |                                                       |      |           |        |       |                                                                                                                                                                                                                                                                                                                                                                                                                                                                                                                                                                                                                                                                                                                                                                                                                                                                                                                                                                                                        |
|-----|-----------------------------------------------------------------------------------------------------|------|-------------------------------------------------------|------|-----------|--------|-------|--------------------------------------------------------------------------------------------------------------------------------------------------------------------------------------------------------------------------------------------------------------------------------------------------------------------------------------------------------------------------------------------------------------------------------------------------------------------------------------------------------------------------------------------------------------------------------------------------------------------------------------------------------------------------------------------------------------------------------------------------------------------------------------------------------------------------------------------------------------------------------------------------------------------------------------------------------------------------------------------------------|
| 870 | c26585_g1_i1_len_2431_path_259_0_2430_1                                                             | 1151 | brain peptide idl-like protein                        | 804  | 7.66E-110 | 88.40% | 0.103 | IPR002172 (SMART); IPR002172 (G3DSA:4.10.400.GENE3D); IPR002172 (PFAM); PTHR20967 (PANTHER); IPR023415 (PROSITE_PATTERNS); CYTOPLASMIC_DOMAIN (PHOBIUS); NON_CYTOPLASMIC_DOMAIN (PHOBIUS); CYTOPLASMIC_DOMAIN (PHOBIUS); TRANSMEMBRANE (PHOBIUS); TRANSMEMBRANE (PHOBIUS); TRANSMEMBRANE (PHOBIUS); NON_CYTOPLASMIC_DOMAIN (PHOBIUS); TRANSMEMBRANE (PHOBIUS); TRANSMEMBRANE (PHOBIUS); CYTOPLASMIC_DOMAIN (PHOBIUS); IPR002172 (PROSITE_PROFILES); IPR002172 (SUPERFAMILY); TMhelix (TMHMM); TMhelix (TMHMM); TMhelix (TMHMM); TMhelix (TMHMM); TMhelix (TMHMM)                                                                                                                                                                                                                                                                                                                                                                                                                                       |
| 871 | c26589_g1_i1_len_3647_path_5444_0_153_5597_154_3646_0                                               | 205  | transducin beta-like protein 2                        | 1216 | 7.95E-143 | 69.20% | 0.129 | Coil (COILS); IPR001680 (SMART); IPR015943 (G3DSA:2.130.10.GENE3D); IPR001680 (PFAM); PTHR22847 (PANTHER); PTHR22847:SF380 (PANTHER); IPR019775 (PROSITE_PATTERNS); CYTOPLASMIC_DOMAIN (PHOBIUS); TRANSMEMBRANE (PHOBIUS); TRANSMEMBRANE (PHOBIUS); TRANSMEMBRANE (PHOBIUS); NON_CYTOPLASMIC_DOMAIN (PHOBIUS); CYTOPLASMIC_DOMAIN (PHOBIUS); CYTOPLASMIC_DOMAIN (PHOBIUS); TRANSMEMBRANE (PHOBIUS); TRANSMEMBRANE (PHOBIUS); CYTOPLASMIC_DOMAIN (PHOBIUS); TRANSMEMBRANE (PHOBIUS); NON_CYTOPLASMIC_DOMAIN (PHOBIUS); NON_CYTOPLASMIC_DOMAIN (PHOBIUS); TRANSMEMBRANE (PHOBIUS); TRANSMEMBRANE (PHOBIUS); CYTOPLASMIC_DOMAIN (PHOBIUS); TRANSMEMBRANE (PHOBIUS); TRANSMEMBRANE (PHOBIUS); NON_CYTOPLASMIC_DOMAIN (PHOBIUS); IPR017986 (PROSITE_PROFILES); IPR001680 (PROSITE_PROFILES); IPR001680 (PROSITE_PROFILES); IPR017986 (SUPERFAMILY); TMhelix (TMHMM); TMhelix (TMHMM) |
| 872 | c26592_g2_i1_len_382_path_1558_0_160_1719_161_191_2028_192_255_1814_256_306_57_307_313_64_314_381_1 | 3    | cre-ptr-16 protein                                    | 127  | 1.75E-17  | 57.80% | 0.111 | PTHR23022 (PANTHER); PTHR23022:SF64 (PANTHER)                                                                                                                                                                                                                                                                                                                                                                                                                                                                                                                                                                                                                                                                                                                                                                                                                                                                                                                                                          |
| 873 | c26598_g1_i1_len_1306_path_162_0_1305_1                                                             | 605  | glutaminy-peptide cyclotransferase-like               | 435  | 9.87E-116 | 68.90% | 0.161 | G3DSA:3.40.630.10 (GENE3D); IPR007484 (PFAM); PTHR12283 (PANTHER); NON_CYTOPLASMIC_DOMAIN (PHOBIUS); TRANSMEMBRANE (PHOBIUS); CYTOPLASMIC_DOMAIN (PHOBIUS); SSF53187 (SUPERFAMILY)                                                                                                                                                                                                                                                                                                                                                                                                                                                                                                                                                                                                                                                                                                                                                                                                                     |
| 874 | c26629_g1_i1_len_1996_path_207_0_1995_5                                                             | 1456 | cd166 antigen                                         | 659  | 3.64E-116 | 56.30% | 0.154 | IPR003598 (SMART); IPR003599 (SMART); PF13895 (PFAM); IPR013783 (G3DSA:2.60.40.GENE3D); IPR013162 (PFAM); IPR013098 (PFAM); IPR013783 (G3DSA:2.60.40.GENE3D); IPR013783 (G3DSA:2.60.40.GENE3D); IPR013783 (G3DSA:2.60.40.GENE3D); PTHR11640:SF52 (PANTHER); PTHR11640 (PANTHER); NON_CYTOPLASMIC_DOMAIN (PHOBIUS); CYTOPLASMIC_DOMAIN (PHOBIUS); TRANSMEMBRANE (PHOBIUS); TRANSMEMBRANE (PHOBIUS); CYTOPLASMIC_DOMAIN (PHOBIUS); IPR007110 (PROSITE_PROFILES); IPR007110 (PROSITE_PROFILES); IPR007110 (PROSITE_PROFILES); IPR007110 (PROSITE_PROFILES); SSF48726 (SUPERFAMILY); SSF48726 (SUPERFAMILY); SSF48726 (SUPERFAMILY); SSF48726 (SUPERFAMILY); TMhelix (TMHMM)                                                                                                                                                                                                                                                                                                                               |
| 875 | c26639_g2_i1_len_1963_path_3193_0_18_73_19_1387_656_1388_1962_4                                     | 266  | mitochondrial 10-formyltetrahydrofolate dehydrogenase | 649  | 0         | 91.80% | 0.125 | IPR015590 (PFAM); IPR016162 (G3DSA:3.40.605.GENE3D); IPR016163 (G3DSA:3.40.309.GENE3D); PTHR11699:SF118 (PANTHER); PTHR11699 (PANTHER); IPR029510 (PROSITE_PATTERNS); IPR016160 (PROSITE_PATTERNS); IPR016161 (SUPERFAMILY)                                                                                                                                                                                                                                                                                                                                                                                                                                                                                                                                                                                                                                                                                                                                                                            |
| 876 | c26639_g2_i2_len_590_path_641_0_14_656_15_589_4                                                     | 8    | cg8665-like partial                                   | 197  | 3.78E-111 | 90.80% | 0.125 | IPR015590 (PFAM); IPR016162 (G3DSA:3.40.605.GENE3D); PTHR11699 (PANTHER); PTHR11699:SF118 (PANTHER); IPR029510 (PROSITE_PATTERNS); IPR016161 (SUPERFAMILY)                                                                                                                                                                                                                                                                                                                                                                                                                                                                                                                                                                                                                                                                                                                                                                                                                                             |
| 877 | c26642_g1_i1_len_236_path_891_0_20_46_21_6_0_202_61_89_998_90_111_252_112_235_2                     | 0    | ---NA---                                              | 78   |           |        | 0.123 | G3DSA:2.40.10.10 (GENE3D); IPR001254 (PFAM); PTHR24275 (PANTHER); IPR009003 (SUPERFAMILY)                                                                                                                                                                                                                                                                                                                                                                                                                                                                                                                                                                                                                                                                                                                                                                                                                                                                                                              |
| 878 | c26693_g1_i1_len_1256_path_475_0_1075_234_1076_1255_0                                               | 4    | ---NA---                                              | 419  |           |        | 0.11  | no IPS match                                                                                                                                                                                                                                                                                                                                                                                                                                                                                                                                                                                                                                                                                                                                                                                                                                                                                                                                                                                           |



|     |                                                                                                              |       |                                                    |     |           |        |         |                                                                                                                                                                                                                                                                                                                                                                                                                                                                                                                                                                                                          |
|-----|--------------------------------------------------------------------------------------------------------------|-------|----------------------------------------------------|-----|-----------|--------|---------|----------------------------------------------------------------------------------------------------------------------------------------------------------------------------------------------------------------------------------------------------------------------------------------------------------------------------------------------------------------------------------------------------------------------------------------------------------------------------------------------------------------------------------------------------------------------------------------------------------|
| 887 | c26762_g1_i4_len_1892_path_41_0_290_331_29<br>1_349_3949_350_350_3248_351_647_3545_648<br>_649_390_650_833_2 | 237   | protein vein                                       | 625 | 8.58E-36  | 61.10% | 0.126   | IPR000742 (SMART); IPR013783 (G3DSA:2.60.40.GENE3D); IPR000742 (PFAM); G3DSA:2.10.25.10 (GENE3D); PTHR11100 (PANTHER); IPR013032 (PROSITE_PATTERNS); IPR013032 (PROSITE_PATTERNS); TRANSMEMBRANE (PHOBIUS); NON_CYTOPLASMIC_DOMAIN (PHOBIUS); CYTOPLASMIC_DOMAIN (PHOBIUS); IPR007110 (PROSITE_PROFILES); IPR000742 (PROSITE_PROFILES); SSF57196 (SUPERFAMILY); SSF48726 (SUPERFAMILY); TMhelix (TMHMM)                                                                                                                                                                                                  |
| 888 | c26798_g1_i1_len_1501_path_2649_0_1500_2                                                                     | 1589  | chymotrypsinogen a                                 | 493 | 8.64E-95  | 58.30% | 0.343 Y | IPR001314 (PRINTS); IPR001254 (SMART); G3DSA:2.40.10.10 (GENE3D); G3DSA:2.40.10.10 (GENE3D); IPR001254 (PFAM); G3DSA:2.40.10.10 (GENE3D); PTHR24260 (PANTHER); PTHR24260:SF47 (PANTHER); TRANSMEMBRANE (PHOBIUS); NON_CYTOPLASMIC_DOMAIN (PHOBIUS); CYTOPLASMIC_DOMAIN (PHOBIUS); IPR001254 (PROSITE_PROFILES); IPR009003 (SUPERFAMILY); TMhelix (TMHMM)                                                                                                                                                                                                                                                 |
| 889 | c26800_g1_i1_len_1179_path_209_0_1178_5                                                                      | 2790  | thioredoxin peroxidase                             | 387 | 3.41E-118 | 88.20% | 0.109   | IPR000866 (PFAM); IPR019479 (PFAM); IPR012336 (G3DSA:3.40.30.GENE3D); PTHR10681 (PANTHER); PTHR10681:SF101 (PANTHER); IPR012336 (PROSITE_PROFILES); IPR012336 (SUPERFAMILY)                                                                                                                                                                                                                                                                                                                                                                                                                              |
| 890 | c26860_g1_i1_len_1256_path_35_0_916_951_91<br>7_917_34_918_1255_0                                            | 6181  | thioredoxin peroxidase                             | 413 | 6.68E-137 | 86.30% | 0.247   | IPR012336 (G3DSA:3.40.30.GENE3D); IPR019479 (PFAM); IPR000866 (PFAM); PTHR10681:SF101 (PANTHER); PTHR10681 (PANTHER); CYTOPLASMIC_DOMAIN (PHOBIUS); NON_CYTOPLASMIC_DOMAIN (PHOBIUS); TRANSMEMBRANE (PHOBIUS); IPR012336 (PROSITE_PROFILES); IPR012336 (SUPERFAMILY)                                                                                                                                                                                                                                                                                                                                     |
| 891 | c26909_g1_i1_len_2790_path_1_0_2789_3                                                                        | 19756 | tissue factor pathway inhibitor 2                  | 925 | 6.59E-33  | 62.30% | 0.103   | Coil (COILS); IPR002223 (PRINTS); IPR002223 (SMART); IPR002223 (G3DSA:4.10.410.GENE3D); IPR002223 (PFAM); IPR002223 (G3DSA:4.10.410.GENE3D); PTHR10083 (PANTHER); IPR020901 (PROSITE_PATTERNS); IPR020901 (PROSITE_PATTERNS); NON_CYTOPLASMIC_DOMAIN (PHOBIUS); TRANSMEMBRANE (PHOBIUS); CYTOPLASMIC_DOMAIN (PHOBIUS); TRANSMEMBRANE (PHOBIUS); CYTOPLASMIC_DOMAIN (PHOBIUS); NON_CYTOPLASMIC_DOMAIN (PHOBIUS); TRANSMEMBRANE (PHOBIUS); IPR002223 (PROSITE_PROFILES); IPR002223 (PROSITE_PROFILES); IPR002223 (SUPERFAMILY); IPR002223 (SUPERFAMILY); TMhelix (TMHMM); TMhelix (TMHMM); TMhelix (TMHMM) |
| 892 | c26929_g1_i1_len_1983_path_2011_0_1337_334<br>9_1338_1982_0                                                  | 32771 | calreticulin                                       | 654 | 0         | 84.20% | 0.223   | Coil (COILS); IPR001580 (PRINTS); IPR001580 (PFAM); IPR013320 (G3DSA:2.60.120.GENE3D); PTHR11073:SF8 (PANTHER); IPR001580 (PANTHER); IPR018124 (PROSITE_PATTERNS); IPR018124 (PROSITE_PATTERNS); IPR018124 (PROSITE_PATTERNS); IPR018124 (PROSITE_PATTERNS); NON_CYTOPLASMIC_DOMAIN (PHOBIUS); CYTOPLASMIC_DOMAIN (PHOBIUS); TRANSMEMBRANE (PHOBIUS); CYTOPLASMIC_DOMAIN (PHOBIUS); TRANSMEMBRANE (PHOBIUS); IPR009033 (SUPERFAMILY); IPR013320 (SUPERFAMILY); TMhelix (TMHMM)                                                                                                                           |
| 893 | c27017_g1_i1_len_653_path_186_0_59_1397_60<br>_652_0                                                         | 11    | calcium calmodulin-dependent protein kinase type 1 | 212 | 3.96E-53  | 96.90% | 0.099   | IPR002290 (SMART); IPR000719 (PFAM); G3DSA:1.10.510.10 (GENE3D); PTHR24347:SF116 (PANTHER); IPR020636 (PANTHER); IPR008271 (PROSITE_PATTERNS); NON_CYTOPLASMIC_DOMAIN (PHOBIUS); CYTOPLASMIC_DOMAIN (PHOBIUS); TRANSMEMBRANE (PHOBIUS); TRANSMEMBRANE (PHOBIUS); NON_CYTOPLASMIC_DOMAIN (PHOBIUS); IPR000719 (PROSITE_PROFILES); IPR011009 (SUPERFAMILY); TMhelix (TMHMM); TMhelix (TMHMM)                                                                                                                                                                                                               |
| 894 | c27020_g1_i1_len_1048_path_101_0_1047_3                                                                      | 67718 | venom allergen 3-like                              | 342 | 1.40E-49  | 51.90% | 0.450 Y | IPR001283 (PRINTS); IPR002413 (PRINTS); IPR014044 (SMART); IPR014044 (G3DSA:3.40.33.GENE3D); IPR014044 (PFAM); IPR001283 (PANTHER); IPR018244 (PROSITE_PATTERNS); TRANSMEMBRANE (PHOBIUS); TRANSMEMBRANE (PHOBIUS); NON_CYTOPLASMIC_DOMAIN (PHOBIUS); CYTOPLASMIC_DOMAIN (PHOBIUS); NON_CYTOPLASMIC_DOMAIN (PHOBIUS); IPR014044 (SUPERFAMILY); TMhelix (TMHMM); TMhelix (TMHMM)                                                                                                                                                                                                                          |
| 895 | c27030_g1_i1_len_388_path_739_0_268_364_26<br>9_309_1047_310_331_1953_332_387_2                              | 18858 | chitinase 2                                        | 129 | 5.21E-34  | 64.50% | 0.112   | IPR001223 (PFAM); IPR013781 (G3DSA:3.20.20.GENE3D); PTHR11177:SF112 (PANTHER); PTHR11177 (PANTHER); IPR017853 (SUPERFAMILY)                                                                                                                                                                                                                                                                                                                                                                                                                                                                              |
| 896 | c27030_g1_i2_len_300_path_183_0_116_300_11<br>7_133_317_134_180_364_181_221_1047_222_2<br>43_1953_244_299_1  | 4118  | chitinase 2                                        | 100 | 3.63E-30  | 66.30% | 0.107   | IPR001223 (PFAM); IPR013781 (G3DSA:3.20.20.GENE3D); PTHR11177 (PANTHER); PTHR11177:SF45 (PANTHER); IPR001579 (PROSITE_PATTERNS); IPR017853 (SUPERFAMILY)                                                                                                                                                                                                                                                                                                                                                                                                                                                 |

|     |                                                                                                        |       |                                                                        |     |          |        |       |                                                                                                                                                                                                                                                                                                                                                                                                                                                                                                                                                                                                                                                                                                                                    |
|-----|--------------------------------------------------------------------------------------------------------|-------|------------------------------------------------------------------------|-----|----------|--------|-------|------------------------------------------------------------------------------------------------------------------------------------------------------------------------------------------------------------------------------------------------------------------------------------------------------------------------------------------------------------------------------------------------------------------------------------------------------------------------------------------------------------------------------------------------------------------------------------------------------------------------------------------------------------------------------------------------------------------------------------|
| 897 | c27034_g2_i1_len_2081_path_2251_0_638_2890_639_2080_0                                                  | 100   | collagen alpha-1 chain                                                 | 689 | 1.31E-92 | 48.90% | 0.103 | IPR016186 (G3DSA:3.10.100.GENE3D); IPR008160 (PFAM); IPR010515 (PFAM); PTHR24023 (PANTHER); PTHR24023:SF471 (PANTHER); IPR016187 (SUPERFAMILY)                                                                                                                                                                                                                                                                                                                                                                                                                                                                                                                                                                                     |
| 898 | c27034_g2_i1_len_2081_path_2251_0_638_2890_639_2080_5                                                  | 100   | gram-positive signal peptide ysirk family                              | 688 | 2.70E-28 | 39.00% | 0.098 | TMhelix (TMHMM)                                                                                                                                                                                                                                                                                                                                                                                                                                                                                                                                                                                                                                                                                                                    |
| 899 | c27034_g2_i2_len_697_path_2251_0_638_6468_639_696_0                                                    | 9     | collagen alpha-1 chain-like isoform x1                                 | 233 | 1.62E-20 | 55.00% | 0.103 | IPR008160 (PFAM); PTHR24023 (PANTHER)                                                                                                                                                                                                                                                                                                                                                                                                                                                                                                                                                                                                                                                                                              |
| 900 | c27034_g2_i2_len_697_path_2251_0_638_6468_639_696_5                                                    | 9     | threonine-rich gpi-anchored partial                                    | 232 | 9.10E-20 | 46.90% | 0.155 | no IPS match                                                                                                                                                                                                                                                                                                                                                                                                                                                                                                                                                                                                                                                                                                                       |
| 901 | c27035_g1_i1_len_571_path_1318_0_72_1391_7_3_89_1670_90_96_1677_97_114_933_115_242_888_243_254_4_255_2 | 20036 | lpxtg-motif cell wall anchor domain protein                            | 190 | 8.06E-08 | 43.33% | 0.094 | no IPS match                                                                                                                                                                                                                                                                                                                                                                                                                                                                                                                                                                                                                                                                                                                       |
| 902 | c27035_g1_i3_len_493_path_1318_0_72_1391_7_3_89_1670_90_96_1415_97_128_899_129_159_1650_160_163_887_2  | 6285  | hypothetical protein NEMVEDRAFT_v1g149369                              | 164 | 1.33E-08 | 51.00% | 0.095 | no IPS match                                                                                                                                                                                                                                                                                                                                                                                                                                                                                                                                                                                                                                                                                                                       |
| 903 | c27035_g1_i4_len_619_path_1318_0_72_1391_7_3_89_1670_90_96_1415_97_128_899_129_159_930_160_162_933_1_2 | 29154 | spore wall protein 2-like                                              | 206 | 1.19E-07 | 43.00% | 0.095 | no IPS match                                                                                                                                                                                                                                                                                                                                                                                                                                                                                                                                                                                                                                                                                                                       |
| 904 | c27055_g1_i1_len_2022_path_53_0_1739_1791_1740_2021_5                                                  | 93    | insulin-like growth factor-binding protein complex acid labile subunit | 668 | 9.73E-85 | 54.10% | 0.13  | IPR003591 (SMART); IPR000483 (SMART); SM00365 (SMART); G3DSA:3.80.10.10 (GENE3D); IPR001611 (PFAM); G3DSA:3.80.10.10 (GENE3D); PTHR24373 (PANTHER); TRANSMEMBRANE (PHOBIUS); NON_CYTOPLASMIC_DOMAIN (PHOBIUS); CYTOPLASMIC_DOMAIN (PHOBIUS); IPR001611 (PROSITE_PROFILES); SSF52058 (SUPERFAMILY); TMhelix (TMHMM)                                                                                                                                                                                                                             |
| 905 | c27065_g1_i1_len_1555_path_1830_0_41_25_42_89_73_90_186_1967_187_227_2008_228_262_2043_263_308_3804_1  | 165   | zinc finger protein 235-like                                           | 513 | 1.86E-39 | 49.10% | 0.142 | IPR015880 (SMART); IPR003656 (SMART); IPR013087 (G3DSA:3.30.160.GENE3D); PF13465 (PFAM); IPR007087 (PFAM); IPR013087 (G3DSA:3.30.160.GENE3D); PF13894 (PFAM); IPR013087 (G3DSA:3.30.160.GENE3D); IPR013087 (G3DSA:3.30.160.GENE3D); PTHR24409:SF14 (PANTHER); PTHR24409 (PANTHER); IPR007087 (PROSITE_PATTERNS); IPR007087 (PROSITE_PATTERNS); IPR007087 (PROSITE_PATTERNS); IPR007087 (PROSITE_PATTERNS); IPR007087 (PROSITE_PATTERNS); IPR007087 (PROSITE_PATTERNS); IPR007087 (PROSITE_PROFILES); IPR007087 (PROSITE_PROFILES); IPR007087 (PROSITE_PROFILES); IPR007087 (PROSITE_PROFILES); IPR007087 (PROSITE_PROFILES); IPR007087 (PROSITE_PROFILES); SSF57667 (SUPERFAMILY); SSF57667 (SUPERFAMILY); SSF57667 (SUPERFAMILY); |
| 906 | c27065_g1_i2_len_1507_path_1830_0_41_73_42_138_1967_139_179_2008_180_214_2043_215_260_3804_261_1506_1  | 156   | zinc finger protein 235-like                                           | 497 | 1.01E-39 | 49.10% | 0.131 | IPR003656 (SMART); IPR015880 (SMART); IPR013087 (G3DSA:3.30.160.GENE3D); IPR013087 (G3DSA:3.30.160.GENE3D); PF13465 (PFAM); IPR013087 (G3DSA:3.30.160.GENE3D); IPR007087 (PFAM); PF13894 (PFAM); PTHR24409 (PANTHER); PTHR24409:SF14 (PANTHER); IPR007087 (PROSITE_PATTERNS); IPR007087 (PROSITE_PATTERNS); IPR007087 (PROSITE_PATTERNS); IPR007087 (PROSITE_PATTERNS); IPR007087 (PROSITE_PATTERNS); IPR007087 (PROSITE_PATTERNS); IPR007087 (PROSITE_PROFILES); IPR007087 (PROSITE_PROFILES); IPR007087 (PROSITE_PROFILES); IPR007087 (PROSITE_PROFILES); IPR007087 (PROSITE_PROFILES); IPR007087 (PROSITE_PROFILES); SSF57667 (SUPERFAMILY); SSF57667 (SUPERFAMILY); SSF57667 (SUPERFAMILY);                                    |

|     |                                                                                                       |        |                                              |     |           |        |       |                                                                                                                                                                                                                                                                                                                                                                                                                                                                                                                                        |
|-----|-------------------------------------------------------------------------------------------------------|--------|----------------------------------------------|-----|-----------|--------|-------|----------------------------------------------------------------------------------------------------------------------------------------------------------------------------------------------------------------------------------------------------------------------------------------------------------------------------------------------------------------------------------------------------------------------------------------------------------------------------------------------------------------------------------------|
| 907 | c27065_g2_i1_len_1703_path_3513_0_133_1967_134_174_6354_175_209_2043_210_255_2089_256_1702_2          | 104    | zinc finger protein 235-like                 | 567 | 2.32E-28  | 43.50% | 0.099 | IPR015880 (SMART); IPR007087 (PFAM); PF13894 (PFAM); PF13465 (PFAM); IPR013087 (G3DSA:3.30.160.GENE3D); IPR013087 (G3DSA:3.30.160.GENE3D); PTHR24409 (PANTHER); PTHR24409:SF14 (PANTHER); IPR007087 (PROSITE_PATTERNS); IPR007087 (PROSITE_PATTERNS); IPR007087 (PROSITE_PATTERNS); IPR007087 (PROSITE_PATTERNS); IPR007087 (PROSITE_PROFILES); IPR007087 (PROSITE_PROFILES); IPR007087 (PROSITE_PROFILES); IPR007087 (PROSITE_PROFILES); IPR007087 (PROSITE_PROFILES); SSF57667 (SUPERFAMILY); SSF57667 (SUPERFAMILY)                 |
| 908 | c27078_g1_i1_len_2921_path_3161_0_733_260_734_895_422_896_2920_2                                      | 283    | phospholipase a-2-activating protein         | 968 | 0         | 65.90% | 0.122 | IPR001680 (SMART); IPR013535 (PFAM); IPR015943 (G3DSA:2.130.10.GENE3D); IPR015155 (PFAM); IPR001680 (PFAM); PTHR19849 (PANTHER); PTHR19849:SF0 (PANTHER); CYTOPLASMIC_DOMAIN (PHOBIUS); NON_CYTOPLASMIC_DOMAIN (PHOBIUS); TRANSMEMBRANE (PHOBIUS); IPR001680 (PROSITE_PROFILES); IPR001680 (PROSITE_PROFILES); IPR017986 (PROSITE_PROFILES); IPR001680 (PROSITE_PROFILES); IPR001680 (PROSITE_PROFILES); IPR013535 (PROSITE_PROFILES); IPR015155 (PROSITE_PROFILES); IPR016024 (SUPERFAMILY); IPR017986 (SUPERFAMILY); TMhelix (TMHMM) |
| 909 | c27078_g1_i2_len_2759_path_3161_0_733_422_734_2758_2                                                  | 302    | phospholipase a-2-activating                 | 914 | 0         | 60.00% | 0.122 | IPR001680 (SMART); IPR013535 (PFAM); IPR001680 (PFAM); IPR015943 (G3DSA:2.130.10.GENE3D); IPR015155 (PFAM); PTHR19849 (PANTHER); PTHR19849:SF0 (PANTHER); NON_CYTOPLASMIC_DOMAIN (PHOBIUS); TRANSMEMBRANE (PHOBIUS); CYTOPLASMIC_DOMAIN (PHOBIUS); IPR001680 (PROSITE_PROFILES); IPR017986 (PROSITE_PROFILES); IPR001680 (PROSITE_PROFILES); IPR013535 (PROSITE_PROFILES); IPR015155 (PROSITE_PROFILES); IPR001680 (PROSITE_PROFILES); IPR017986 (SUPERFAMILY); IPR016024 (SUPERFAMILY); TMhelix (TMHMM)                               |
| 910 | c27083_g2_i1_len_2659_path_2926_0_558_6050_559_719_3646_720_1682_4609_1683_2658_0                     | 1327   | 14-3-3 protein zeta isoform x2               | 887 | 8.10E-163 | 95.70% | 0.133 | Coil (COILS); IPR000308 (PRINTS); IPR023410 (SMART); IPR023410 (PFAM); G3DSA:1.20.190.20 (GENE3D); IPR000308 (PANTHER); IPR023409 (PROSITE_PATTERNS); IPR023409 (PROSITE_PATTERNS); NON_CYTOPLASMIC_DOMAIN (PHOBIUS); TRANSMEMBRANE (PHOBIUS); CYTOPLASMIC_DOMAIN (PHOBIUS); TRANSMEMBRANE (PHOBIUS); NON_CYTOPLASMIC_DOMAIN (PHOBIUS); IPR023410 (SUPERFAMILY); TMhelix (TMHMM); TMhelix (TMHMM); TMhelix (TMHMM)                                                                                                                     |
| 911 | c27088_g1_i1_len_1624_path_1735_0_328_2063_329_329_117_330_883_2616_884_884_71_885_1132_2863_1133_1_5 | 107    | macro domain-containing protein 2            | 541 | 1.83E-83  | 69.40% | 0.101 | Coil (COILS); IPR002589 (SMART); IPR002589 (PFAM); G3DSA:3.40.220.10 (GENE3D); PTHR11106 (PANTHER); CYTOPLASMIC_DOMAIN (PHOBIUS); TRANSMEMBRANE (PHOBIUS); TRANSMEMBRANE (PHOBIUS); CYTOPLASMIC_DOMAIN (PHOBIUS); NON_CYTOPLASMIC_DOMAIN (PHOBIUS); IPR002589 (PROSITE_PROFILES); SSF52949 (SUPERFAMILY); TMhelix (TMHMM)                                                                                                                                                                                                              |
| 912 | c27088_g1_i2_len_824_path_117_0_553_71_554_801_3442_802_823_3                                         | 16     | o-acetyl-adp-ribose deacetylase macrod2-like | 275 | 1.70E-65  | 78.80% | 0.114 | IPR002589 (SMART); G3DSA:3.40.220.10 (GENE3D); IPR002589 (PFAM); PTHR11106 (PANTHER); IPR002589 (PROSITE_PROFILES); SSF52949 (SUPERFAMILY)                                                                                                                                                                                                                                                                                                                                                                                             |
| 913 | c27096_g1_i1_len_2393_path_241_0_1105_1346_1106_1122_198_1123_1771_2679_1772_2392_0                   | 173    | inactive dipeptidyl peptidase 10             | 798 | 0         | 62.10% | 0.112 | IPR002469 (G3DSA:2.140.10.GENE3D); IPR001375 (PFAM); IPR002469 (PFAM); IPR029058 (G3DSA:3.40.50.GENE3D); PTHR11731 (PANTHER); PTHR11731:SF22 (PANTHER); NON_CYTOPLASMIC_DOMAIN (PHOBIUS); TRANSMEMBRANE (PHOBIUS); CYTOPLASMIC_DOMAIN (PHOBIUS); SSF82171 (SUPERFAMILY); IPR029058 (SUPERFAMILY)                                                                                                                                                                                                                                       |
| 914 | c27101_g1_i1_len_1141_path_1326_0_1140_1                                                              | 140921 | transmembrane protease serine 4              | 380 | 1.10E-39  | 52.30% | 0.317 | IPR001314 (PRINTS); IPR001254 (SMART); G3DSA:2.40.10.10 (GENE3D); G3DSA:2.40.10.10 (GENE3D); IPR001254 (PFAM); G3DSA:2.40.10.10 (GENE3D); PTHR24268 (PANTHER); IPR018114 (PROSITE_PATTERNS); IPR018114 (PROSITE_PATTERNS); IPR001254 (PROSITE_PROFILES); IPR009003 (SUPERFAMILY)                                                                                                                                                                                                                                                       |
| 915 | c27103_g2_i2_len_679_path_3525_0_19_2871_2_0_112_2964_113_457_21_458_678_1                            | 33     | zinc finger protein 717-like                 | 226 | 2.67E-12  | 47.40% | 0.098 | IPR015880 (SMART); IPR013087 (G3DSA:3.30.160.GENE3D); PF13465 (PFAM); PTHR24409:SF13 (PANTHER); PTHR24409 (PANTHER); IPR007087 (PROSITE_PATTERNS); IPR007087 (PROSITE_PATTERNS); IPR007087 (PROSITE_PROFILES); IPR007087 (PROSITE_PROFILES); SSF57667 (SUPERFAMILY)                                                                                                                                                                                                                                                                    |



|     |                                                                                                      |       |                                                                                 |     |           |        |         |                                                                                                                                                                                                                                                                                                                                                                                                                                                                                                                                                                                                                   |
|-----|------------------------------------------------------------------------------------------------------|-------|---------------------------------------------------------------------------------|-----|-----------|--------|---------|-------------------------------------------------------------------------------------------------------------------------------------------------------------------------------------------------------------------------------------------------------------------------------------------------------------------------------------------------------------------------------------------------------------------------------------------------------------------------------------------------------------------------------------------------------------------------------------------------------------------|
| 916 | c27103_g2_i3_len_1414_path_2118_0_505_3568_506_508_2625_509_754_2871_755_847_2964_848_1192_21_1193_1 | 57    | zinc finger protein 717-like                                                    | 471 | 1.40E-11  | 45.60% | 0.282   | IPR015880 (SMART); IPR013087 (G3DSA:3.30.160.GENE3D); PF13465 (PFAM); PTHR24409 (PANTHER); PTHR24409:SF13 (PANTHER); IPR007087 (PROSITE_PATTERNS); IPR007087 (PROSITE_PATTERNS); IPR007087 (PROSITE_PROFILES); IPR007087 (PROSITE_PROFILES); SSF57667 (SUPERFAMILY)                                                                                                                                                                                                                                                                                                                                               |
| 917 | c27129_g1_i1_len_1139_path_1185_0_294_1480_295_295_1481_296_1138_2                                   | 220   | vacuolar-sorting protein snf8-like                                              | 379 | 1.23E-121 | 83.60% | 0.121   | Coil (COILS); IPR011991 (G3DSA:1.10.10.GENE3D); IPR011991 (G3DSA:1.10.10.GENE3D); IPR007286 (PFAM); IPR007286 (PANTHER); PTHR12806:SF0 (PANTHER); SSF46785 (SUPERFAMILY); SSF46785 (SUPERFAMILY)                                                                                                                                                                                                                                                                                                                                                                                                                  |
| 918 | c27138_g1_i1_len_2047_path_1_0_441_4358_44_2_447_449_448_461_463_462_836_838_837_20_46_2             | 169   | serine threonine-protein phosphatase 6 regulatory ankyrin repeat subunit c-like | 682 | 1.60E-95  | 55.00% | 0.219   | IPR002110 (SMART); IPR002110 (PFAM); IPR020683 (G3DSA:1.25.40.GENE3D); IPR020683 (PFAM); IPR020683 (G3DSA:1.25.40.GENE3D); IPR020683 (G3DSA:1.25.40.GENE3D); PTHR24198 (PANTHER); NON_CYTOPLASMIC_DOMAIN (PHOBIUS); NON_CYTOPLASMIC_DOMAIN (PHOBIUS); CYTOPLASMIC_DOMAIN (PHOBIUS); TRANSMEMBRANE (PHOBIUS); TRANSMEMBRANE (PHOBIUS); IPR002110 (PROSITE_PROFILES); IPR020683 (PROSITE_PROFILES); IPR002110 (PROSITE_PROFILES); IPR002110 (PROSITE_PROFILES); IPR002110 (PROSITE_PROFILES); IPR002110 (PROSITE_PROFILES); IPR002110 (PROSITE_PROFILES); IPR020683 (SUPERFAMILY); TMhelix (TMHMM); TMhelix (TMHMM) |
| 919 | c27156_g1_i1_len_1653_path_3573_0_175_318_176_635_778_636_1167_1308_1168_1299_1440_1300_1652_1       | 802   | ectonucleotide pyrophosphatase phosphodiesterase family member 6                | 545 | 1.89E-119 | 55.50% | 0.113   | IPR017849 (G3DSA:3.40.720.GENE3D); IPR002591 (PFAM); IPR024873 (PANTHER); TRANSMEMBRANE (PHOBIUS); CYTOPLASMIC_DOMAIN (PHOBIUS); NON_CYTOPLASMIC_DOMAIN (PHOBIUS); IPR017850 (SUPERFAMILY)                                                                                                                                                                                                                                                                                                                                                                                                                        |
| 920 | c27156_g1_i2_len_553_path_3946_0_20_778_21_552_1                                                     | 71    | ectonucleotide pyrophosphatase phosphodiesterase family member 7-like           | 184 | 2.44E-30  | 56.30% | 0.136   | IPR017849 (G3DSA:3.40.720.GENE3D); IPR002591 (PFAM); IPR024873 (PANTHER); IPR017850 (SUPERFAMILY)                                                                                                                                                                                                                                                                                                                                                                                                                                                                                                                 |
| 921 | c27156_g1_i3_len_1726_path_69_0_248_318_24_9_708_778_709_1240_1308_1241_1372_1440_1_373_1725_2       | 771   | ectonucleotide pyrophosphatase phosphodiesterase family member 6                | 569 | 1.95E-119 | 55.60% | 0.228   | IPR006612 (SMART); IPR017849 (G3DSA:3.40.720.GENE3D); IPR006612 (PFAM); IPR002591 (PFAM); IPR024873 (PANTHER); NON_CYTOPLASMIC_DOMAIN (PHOBIUS); CYTOPLASMIC_DOMAIN (PHOBIUS); TRANSMEMBRANE (PHOBIUS); IPR006612 (PROSITE_PROFILES); SSF57716 (SUPERFAMILY); IPR017850 (SUPERFAMILY)                                                                                                                                                                                                                                                                                                                             |
| 922 | c27162_g1_i1_len_313_path_176_0_312_5                                                                | 21533 | snake venom serine protease da-36                                               | 97  | 4.06E-06  | 76.00% | 0.102   | IPR001254 (PFAM); G3DSA:2.40.10.10 (GENE3D); PTHR24275 (PANTHER); IPR009003 (SUPERFAMILY)                                                                                                                                                                                                                                                                                                                                                                                                                                                                                                                         |
| 923 | c27200_g1_i1_len_1570_path_1648_0_1569_2                                                             | 314   | hydroxyacyl dehydrogenase                                                       | 510 | 6.58E-129 | 83.60% | 0.141   | IPR002347 (PRINTS); IPR002198 (PRINTS); IPR002198 (PFAM); IPR016040 (G3DSA:3.40.50.GENE3D); PTHR24316 (PANTHER); PTHR24316:SF251 (PANTHER); IPR020904 (PROSITE_PATTERNS); SSF51735 (SUPERFAMILY)                                                                                                                                                                                                                                                                                                                                                                                                                  |
| 924 | c27203_g1_i1_len_660_path_1558_0_534_305_5_35_659_0                                                  | 11    | peptidyl-prolyl cis-trans isomerase ppif                                        | 220 | 2.93E-37  | 53.50% | 0.108   | IPR029000 (G3DSA:2.40.100.GENE3D); IPR002130 (PFAM); PTHR11071:SF202 (PANTHER); IPR024936 (PANTHER); CYTOPLASMIC_DOMAIN (PHOBIUS); NON_CYTOPLASMIC_DOMAIN (PHOBIUS); TRANSMEMBRANE (PHOBIUS); IPR002130 (PROSITE_PROFILES); IPR029000 (SUPERFAMILY); TMhelix (TMHMM)                                                                                                                                                                                                                                                                                                                                              |
| 925 | c27203_g1_i2_len_1140_path_1558_0_534_2092_535_582_129_583_839_446_840_1139_0                        | 107   | peptidyl-prolyl cis-trans                                                       | 375 | 1.80E-36  | 53.50% | 0.108   | IPR002130 (PFAM); IPR029000 (G3DSA:2.40.100.GENE3D); IPR024936 (PANTHER); PTHR11071:SF202 (PANTHER); TRANSMEMBRANE (PHOBIUS); NON_CYTOPLASMIC_DOMAIN (PHOBIUS); TRANSMEMBRANE (PHOBIUS); NON_CYTOPLASMIC_DOMAIN (PHOBIUS); CYTOPLASMIC_DOMAIN (PHOBIUS); TRANSMEMBRANE (PHOBIUS); CYTOPLASMIC_DOMAIN (PHOBIUS); NON_CYTOPLASMIC_DOMAIN (PHOBIUS); TRANSMEMBRANE (PHOBIUS); IPR002130 (PROSITE_PROFILES); IPR029000 (SUPERFAMILY); TMhelix (TMHMM); TMhelix (TMHMM); TMhelix (TMHMM); TMhelix (TMHMM); TMhelix (TMHMM); TMhelix (TMHMM)                                                                            |
| 926 | c27232_g1_i1_len_398_path_789_0_31_818_32_32_102_33_56_842_57_302_1084_303_354_113_6_355_397_5       | 686   | carboxypeptidase b-like                                                         | 132 | 4.76E-13  | 53.80% | 0.683 Y | IPR003146 (G3DSA:3.30.70.GENE3D); IPR003146 (PFAM); PTHR11705 (PANTHER); SignalP-noTM (SIGNALP_EUK); IPR009020 (SUPERFAMILY)                                                                                                                                                                                                                                                                                                                                                                                                                                                                                      |
| 927 | c27255_g3_i2_len_1545_path_1_0_378_380_37_9_1175_13509_1176_1178_13512_1179_1544_5                   | 601   | nucleoporin seh1 isoform x2                                                     | 509 | 0         | 84.70% | 0.281   | IPR020472 (PRINTS); IPR001680 (SMART); IPR001680 (PFAM); IPR015943 (G3DSA:2.130.10.GENE3D); PTHR11024 (PANTHER); PTHR11024:SF3 (PANTHER); IPR001680 (PROSITE_PROFILES); IPR017986 (PROSITE_PROFILES); IPR017986 (PROSITE_PROFILES); IPR001680 (PROSITE_PROFILES); IPR017986 (SUPERFAMILY)                                                                                                                                                                                                                                                                                                                         |

|     |                                                                                                       |      |                                          |     |           |        |       |                                                                                                                                                                                                                                                                                                                                                                                                                                                                                                                  |
|-----|-------------------------------------------------------------------------------------------------------|------|------------------------------------------|-----|-----------|--------|-------|------------------------------------------------------------------------------------------------------------------------------------------------------------------------------------------------------------------------------------------------------------------------------------------------------------------------------------------------------------------------------------------------------------------------------------------------------------------------------------------------------------------|
| 928 | c27256_g5_i1_len_2117_path_2873_0_163_6065_164_1085_6987_1086_1526_7426_1527_1880_1904_1881_2116_2    | 185  | von willebrand domain-containing protein | 693 | 1.42E-133 | 55.90% | 0.202 | IPR002035 (SMART); IPR002035 (G3DSA:3.40.50.GENE3D); PF13768 (PFAM); PTHR10338 (PANTHER); PTHR10338:SF95 (PANTHER); NON_CYTOPLASMIC_DOMAIN (PHOBIUS); NON_CYTOPLASMIC_DOMAIN (PHOBIUS); CYTOPLASMIC_DOMAIN (PHOBIUS); TRANSMEMBRANE (PHOBIUS); TRANSMEMBRANE (PHOBIUS); CYTOPLASMIC_DOMAIN (PHOBIUS); IPR002035 (PROSITE_PROFILES); IPR002035 (SUPERFAMILY)                                                                                                                                                      |
| 929 | c27256_g5_i2_len_1440_path_2873_0_163_6065_164_1085_7426_1086_1439_2                                  | 48   | von willebrand domain-containing protein | 474 | 9.71E-105 | 59.70% | 0.202 | IPR002035 (SMART); PF13768 (PFAM); IPR002035 (G3DSA:3.40.50.GENE3D); PTHR10338:SF95 (PANTHER); PTHR10338 (PANTHER); IPR002035 (PROSITE_PROFILES); IPR002035 (SUPERFAMILY)                                                                                                                                                                                                                                                                                                                                        |
| 930 | c27266_g1_i1_len_1617_path_1645_0_941_2585_942_954_2598_955_1192_2836_1193_1198_2842_1199_1616_1      | 211  | beta- -galactosyltransferase 7           | 532 | 1.92E-126 | 72.30% | 0.229 | IPR003859 (PRINTS); IPR027995 (PFAM); IPR027791 (PFAM); IPR029044 (G3DSA:3.90.550.GENE3D); PTHR19300:SF1 (PANTHER); IPR003859 (PANTHER); TRANSMEMBRANE (PHOBIUS); CYTOPLASMIC_DOMAIN (PHOBIUS); TRANSMEMBRANE (PHOBIUS); NON_CYTOPLASMIC_DOMAIN (PHOBIUS); CYTOPLASMIC_DOMAIN (PHOBIUS); IPR029044 (SUPERFAMILY); TMhelix (TMHMM); TMhelix (TMHMM); TMhelix (TMHMM); TMhelix (TMHMM); TMhelix (TMHMM)                                                                                                            |
| 931 | c27267_g1_i1_len_1529_path_1552_0_172_1725_173_189_1742_190_306_39_307_736_2288_737_738_2290_739_13_1 | 168  | upf0378 protein kiaa0100                 | 504 | 2.87E-61  | 54.20% | 0.091 | NON_CYTOPLASMIC_DOMAIN (PHOBIUS); CYTOPLASMIC_DOMAIN (PHOBIUS); NON_CYTOPLASMIC_DOMAIN (PHOBIUS); TRANSMEMBRANE (PHOBIUS); TRANSMEMBRANE (PHOBIUS); CYTOPLASMIC_DOMAIN (PHOBIUS); TRANSMEMBRANE (PHOBIUS); TMhelix (TMHMM); TMhelix (TMHMM); TMhelix (TMHMM)                                                                                                                                                                                                                                                     |
| 932 | c27281_g1_i1_len_2082_path_1469_0_1364_2831_1365_1367_1351_1368_1505_2970_1506_1508_1468_1509_2037_2  | 247  | lysine--trna ligase isoform x2           | 687 | 0         | 86.50% | 0.109 | Coil (COILS); IPR018149 (PRINTS); IPR004365 (PFAM); IPR004364 (PFAM); IPR012340 (G3DSA:2.40.50.GENE3D); G3DSA:3.30.930.10 (GENE3D); IPR002313 (TIGRFAM); IPR002313 (PIRSF); PTHR22594:SF4 (PANTHER); IPR018150 (PANTHER); TRANSMEMBRANE (PHOBIUS); NON_CYTOPLASMIC_DOMAIN (PHOBIUS); CYTOPLASMIC_DOMAIN (PHOBIUS); TRANSMEMBRANE (PHOBIUS); NON_CYTOPLASMIC_DOMAIN (PHOBIUS); IPR002313 (HAMAP); IPR006195 (PROSITE_PROFILES); SSF55681 (SUPERFAMILY); IPR012340 (SUPERFAMILY); TMhelix (TMHMM); TMhelix (TMHMM) |
| 933 | c27289_g4_i1_len_2179_path_1_0_374_376_375_398_400_399_1198_1200_1199_1230_1232_1231_1489_1491_1490_5 | 87   | zinc finger protein 501 isoform x2       | 720 | 7.27E-11  | 60.20% | 0.1   | IPR000210 (SMART); IPR015880 (SMART); IPR013087 (G3DSA:3.30.160.GENE3D); IPR013069 (PFAM); G3DSA:3.30.710.10 (GENE3D); IPR013087 (G3DSA:3.30.160.GENE3D); PTHR24409 (PANTHER); PTHR24409:SF14 (PANTHER); IPR007087 (PROSITE_PATTERNS); IPR000210 (PROSITE_PROFILES); IPR007087 (PROSITE_PROFILES); SSF57667 (SUPERFAMILY); IPR011333 (SUPERFAMILY)                                                                                                                                                               |
| 934 | c27302_g1_i2_len_1968_path_4457_0_125_4583_126_1330_1159_1331_1967_5                                  | 185  | cytochrome p450                          | 656 | 0         | 69.50% | 0.333 | Coil (COILS); IPR002401 (PRINTS); IPR001128 (PRINTS); IPR001128 (PFAM); IPR001128 (G3DSA:1.10.630.GENE3D); PTHR24290:SF0 (PANTHER); PTHR24290 (PANTHER); IPR017972 (PROSITE_PATTERNS); TRANSMEMBRANE (PHOBIUS); CYTOPLASMIC_DOMAIN (PHOBIUS); NON_CYTOPLASMIC_DOMAIN (PHOBIUS); CYTOPLASMIC_DOMAIN (PHOBIUS); TRANSMEMBRANE (PHOBIUS); IPR001128 (SUPERFAMILY); TMhelix (TMHMM); TMhelix (TMHMM)                                                                                                                 |
| 935 | c27305_g4_i1_len_1536_path_2484_0_102_2263_103_131_2292_132_219_2380_220_1138_2937_1139_1535_0        | 138  | ankyrin repeat family a protein 2        | 507 | 3.55E-72  | 67.70% | 0.135 | Coil (COILS); IPR002110 (SMART); IPR020683 (PFAM); IPR020683 (G3DSA:1.25.40.GENE3D); IPR002110 (PFAM); PTHR24124:SF6 (PANTHER); PTHR24124 (PANTHER); IPR020683 (PROSITE_PROFILES); IPR002110 (PROSITE_PROFILES); IPR002110 (PROSITE_PROFILES); IPR002110 (PROSITE_PROFILES); IPR020683 (SUPERFAMILY)                                                                                                                                                                                                             |
| 936 | c27353_g1_i1_len_1350_path_4590_0_755_5367_756_756_5368_757_758_92_759_1349_2                         | 6127 | ferritin                                 | 443 | 1.55E-82  | 84.70% | 0.338 | Coil (COILS); IPR012347 (G3DSA:1.20.1260.GENE3D); IPR008331 (PFAM); IPR001519 (PANTHER); IPR014034 (PROSITE_PATTERNS); IPR014034 (PROSITE_PATTERNS); TRANSMEMBRANE (PHOBIUS); NON_CYTOPLASMIC_DOMAIN (PHOBIUS); NON_CYTOPLASMIC_DOMAIN (PHOBIUS); TRANSMEMBRANE (PHOBIUS); CYTOPLASMIC_DOMAIN (PHOBIUS); IPR009040 (PROSITE_PROFILES); IPR009078 (SUPERFAMILY); TMhelix (TMHMM); TMhelix (TMHMM)                                                                                                                 |
| 937 | c27364_g1_i1_len_1296_path_291_0_320_200_321_1216_1668_1217_1295_0                                    | 215  | venom allergen 5-like                    | 427 | 2.95E-15  | 50.40% | 0.11  | IPR001283 (PRINTS); IPR014044 (SMART); IPR014044 (G3DSA:3.40.33.GENE3D); PTHR10334:SF153 (PANTHER); IPR001283 (PANTHER); TRANSMEMBRANE (PHOBIUS); NON_CYTOPLASMIC_DOMAIN (PHOBIUS); NON_CYTOPLASMIC_DOMAIN (PHOBIUS); TRANSMEMBRANE (PHOBIUS); CYTOPLASMIC_DOMAIN (PHOBIUS); CYTOPLASMIC_DOMAIN (PHOBIUS); IPR014044 (SUPERFAMILY); TMhelix (TMHMM); TMhelix (TMHMM); TMhelix (TMHMM)                                                                                                                            |

Supplementary Table 8

|     |                                                                                                         |        |                                                   |     |           |        |       |                                                                                                                                                                                                                                                                                                                                                                                                                                                                                                                                                                                                                                                                                                                                                                                                                                                                                               |
|-----|---------------------------------------------------------------------------------------------------------|--------|---------------------------------------------------|-----|-----------|--------|-------|-----------------------------------------------------------------------------------------------------------------------------------------------------------------------------------------------------------------------------------------------------------------------------------------------------------------------------------------------------------------------------------------------------------------------------------------------------------------------------------------------------------------------------------------------------------------------------------------------------------------------------------------------------------------------------------------------------------------------------------------------------------------------------------------------------------------------------------------------------------------------------------------------|
| 944 | c27439_g2_i1_len_1679_path_357_0_1154_1512_1155_1355_3672_1356_1678_4                                   | 54     | alcohol dehydrogenase                             | 560 | 1.12E-113 | 66.10% | 0.107 | IPR020471 (PRINTS); IPR023210 (G3DSA:3.20.20.GENE3D); IPR023210 (PFAM); IPR001395 (PANTHER); PTHR11732:SF183 (PANTHER); IPR018170 (PROSITE_PATTERNS); IPR018170 (PROSITE_PATTERNS); IPR018170 (PROSITE_PATTERNS); CYTOPLASMIC_DOMAIN (PHOBIUS); TRANSMEMBRANE (PHOBIUS); NON_CYTOPLASMIC_DOMAIN (PHOBIUS); NON_CYTOPLASMIC_DOMAIN (PHOBIUS); TRANSMEMBRANE (PHOBIUS); CYTOPLASMIC_DOMAIN (PHOBIUS); TRANSMEMBRANE (PHOBIUS); IPR023210 (SUPERFAMILY); TMhelix (TMHMM); TMhelix (TMHMM); TMhelix (TMHMM)                                                                                                                                                                                                                                                                                                                                                                                       |
| 945 | c27443_g1_i2_len_2155_path_1_0_1023_1025_1_024_1490_1492_1491_1612_3381_1613_1697_3_182_1698_1721_348_2 | 152    | dnaj homolog subfamily c member 7                 | 718 | 0         | 74.50% | 0.103 | IPR001623 (PRINTS); IPR001623 (SMART); IPR019734 (SMART); IPR013105 (PFAM); IPR001623 (G3DSA:1.10.287.GENE3D); IPR011990 (G3DSA:1.25.40.GENE3D); IPR001623 (PFAM); PF13414 (PFAM); IPR011990 (G3DSA:1.25.40.GENE3D); IPR019734 (PFAM); PTHR24078:SF140 (PANTHER); PTHR24078 (PANTHER); IPR018253 (PROSITE_PATTERNS); TRANSMEMBRANE (PHOBIUS); TRANSMEMBRANE (PHOBIUS); CYTOPLASMIC_DOMAIN (PHOBIUS); NON_CYTOPLASMIC_DOMAIN (PHOBIUS); CYTOPLASMIC_DOMAIN (PHOBIUS); TRANSMEMBRANE (PHOBIUS); TRANSMEMBRANE (PHOBIUS); IPR019734 (PROSITE_PROFILES); IPR013026 (PROSITE_PROFILES); IPR019734 (PROSITE_PROFILES); IPR019734 (PROSITE_PROFILES); IPR001623 (PROSITE_PROFILES); IPR019734 (PROSITE_PROFILES); IPR019734 (PROSITE_PROFILES); IPR019734 (PROSITE_PROFILES); IPR019734 (PROSITE_PROFILES); SSF48452 (SUPERFAMILY); IPR001623 (SUPERFAMILY); SSF48452 (SUPERFAMILY); TMhelix (TMHMM) |
| 946 | c27443_g1_i3_len_715_path_3004_0_18_1025_1_9_485_1492_486_607_3099_608_690_3182_691_714_2               | 45     | dnaj homolog subfamily c member 7                 | 238 | 9.51E-60  | 77.90% | 0.102 | IPR001623 (PRINTS); IPR001623 (SMART); IPR001623 (PFAM); IPR001623 (G3DSA:1.10.287.GENE3D); PTHR24078 (PANTHER); PTHR24078:SF139 (PANTHER); IPR018253 (PROSITE_PATTERNS); IPR001623 (PROSITE_PROFILES); IPR001623 (SUPERFAMILY)                                                                                                                                                                                                                                                                                                                                                                                                                                                                                                                                                                                                                                                               |
| 947 | c27452_g1_i2_len_846_path_4526_0_133_1880_134_643_228_644_845_3                                         | 82     | map7 domain-containing protein 1-like isoform x1  | 276 | 6.77E-11  | 55.00% | 0.126 | Coil (COILS); Coil (COILS)                                                                                                                                                                                                                                                                                                                                                                                                                                                                                                                                                                                                                                                                                                                                                                                                                                                                    |
| 948 | c27452_g1_i4_len_1396_path_1196_0_683_1880_684_1193_228_1194_1395_3                                     | 71     | map7 domain-containing protein 1-like isoform x12 | 460 | 6.49E-11  | 50.50% | 0.126 | Coil (COILS); Coil (COILS)                                                                                                                                                                                                                                                                                                                                                                                                                                                                                                                                                                                                                                                                                                                                                                                                                                                                    |
| 949 | c27458_g1_i1_len_1151_path_1073_0_304_2213_305_435_2583_436_1150_2                                      | 113    | acyl- delta desaturase                            | 383 | 1.13E-163 | 76.50% | 0.137 | IPR015876 (PRINTS); IPR005804 (PFAM); PTHR11351 (PANTHER); PTHR11351:SF28 (PANTHER); TRANSMEMBRANE (PHOBIUS); CYTOPLASMIC_DOMAIN (PHOBIUS); CYTOPLASMIC_DOMAIN (PHOBIUS); NON_CYTOPLASMIC_DOMAIN (PHOBIUS); TRANSMEMBRANE (PHOBIUS); NON_CYTOPLASMIC_DOMAIN (PHOBIUS); CYTOPLASMIC_DOMAIN (PHOBIUS); TRANSMEMBRANE (PHOBIUS); TRANSMEMBRANE (PHOBIUS); TMhelix (TMHMM); TMhelix (TMHMM); TMhelix (TMHMM); TMhelix (TMHMM)                                                                                                                                                                                                                                                                                                                                                                                                                                                                     |
| 950 | c27458_g1_i2_len_1020_path_1073_0_304_2583_305_1019_0                                                   | 115    | acyl- delta desaturase                            | 340 | 8.77E-118 | 82.70% | 0.331 | IPR015876 (PRINTS); IPR005804 (PFAM); PTHR11351:SF28 (PANTHER); PTHR11351 (PANTHER); TRANSMEMBRANE (PHOBIUS); CYTOPLASMIC_DOMAIN (PHOBIUS); TRANSMEMBRANE (PHOBIUS); CYTOPLASMIC_DOMAIN (PHOBIUS); NON_CYTOPLASMIC_DOMAIN (PHOBIUS); TMhelix (TMHMM); TMhelix (TMHMM)                                                                                                                                                                                                                                                                                                                                                                                                                                                                                                                                                                                                                         |
| 951 | c27512_g1_i1_len_1535_path_315_0_175_490_1_76_215_47_216_260_573_261_1501_1807_1502_1534_1              | 1124   | serine protease 56                                | 506 | 7.92E-11  | 43.90% | 0.103 | IPR001254 (SMART); G3DSA:2.40.10.10 (GENE3D); TRANSMEMBRANE (PHOBIUS); CYTOPLASMIC_DOMAIN (PHOBIUS); NON_CYTOPLASMIC_DOMAIN (PHOBIUS); IPR001254 (PROSITE_PROFILES); IPR009003 (SUPERFAMILY); TMhelix (TMHMM)                                                                                                                                                                                                                                                                                                                                                                                                                                                                                                                                                                                                                                                                                 |
| 952 | c27512_g1_i2_len_1525_path_315_0_175_490_1_76_215_47_216_260_573_261_1501_3478_1502_1524_1              | 1088   | serine protease 56                                | 503 | 7.35E-11  | 43.90% | 0.103 | IPR001254 (SMART); G3DSA:2.40.10.10 (GENE3D); CYTOPLASMIC_DOMAIN (PHOBIUS); TRANSMEMBRANE (PHOBIUS); NON_CYTOPLASMIC_DOMAIN (PHOBIUS); IPR001254 (PROSITE_PROFILES); IPR009003 (SUPERFAMILY); TMhelix (TMHMM)                                                                                                                                                                                                                                                                                                                                                                                                                                                                                                                                                                                                                                                                                 |
| 953 | c27520_g1_i1_len_1507_path_105_0_1388_1490_1389_1506_0                                                  | 145668 | carboxypeptidase b-like                           | 495 | 2.40E-126 | 62.40% | 0.332 | IPR000834 (PRINTS); IPR000834 (SMART); IPR003146 (PFAM); IPR003146 (G3DSA:3.30.70.GENE3D); G3DSA:3.40.630.10 (GENE3D); IPR000834 (PFAM); PTHR11705 (PANTHER); IPR000834 (PROSITE_PATTERNS); TRANSMEMBRANE (PHOBIUS); CYTOPLASMIC_DOMAIN (PHOBIUS); NON_CYTOPLASMIC_DOMAIN (PHOBIUS); SSF53187 (SUPERFAMILY); IPR009020 (SUPERFAMILY); TMhelix (TMHMM)                                                                                                                                                                                                                                                                                                                                                                                                                                                                                                                                         |

[illegible]



|     |                                                                                                               |     |                                        |     |           |        |       |                                                                                                                                                                                                                                                                                                                                                                                                                                                                                                                                                                                                                                                                                                                                                                                                                                                                                                                                                                                                                                                         |
|-----|---------------------------------------------------------------------------------------------------------------|-----|----------------------------------------|-----|-----------|--------|-------|---------------------------------------------------------------------------------------------------------------------------------------------------------------------------------------------------------------------------------------------------------------------------------------------------------------------------------------------------------------------------------------------------------------------------------------------------------------------------------------------------------------------------------------------------------------------------------------------------------------------------------------------------------------------------------------------------------------------------------------------------------------------------------------------------------------------------------------------------------------------------------------------------------------------------------------------------------------------------------------------------------------------------------------------------------|
| 962 | c27635_g1_i1_len_1723_path_199_0_527_722_5<br>28_738_125_739_1273_1466_1274_1275_78_12<br>76_1722_1           | 195 | 3-hydroxyisobutyrate mitochondrial     | 574 | 9.07E-151 | 81.30% | 0.233 | IPR006115 (PFAM); IPR029154 (PFAM); IPR013328<br>(G3DSA:1.10.1040.GENE3D); IPR011548 (TIGRFAM); IPR016040<br>(G3DSA:3.40.50.GENE3D); PTHR22981:SF51 (PANTHER); PTHR22981<br>(PANTHER); IPR002204 (PROSITE_PATTERNS); TRANSMEMBRANE<br>(PHOBIUS); CYTOPLASMIC_DOMAIN (PHOBIUS);<br>NON_CYTOPLASMIC_DOMAIN (PHOBIUS); IPR008927 (SUPERFAMILY);<br>SSF51735 (SUPERFAMILY)                                                                                                                                                                                                                                                                                                                                                                                                                                                                                                                                                                                                                                                                                  |
| 963 | c27635_g1_i2_len_1063_path_199_0_527_125_5<br>28_1062_1                                                       | 50  | 3-hydroxyisobutyrate mitochondrial     | 354 | 1.11E-50  | 75.90% | 0.233 | IPR006115 (PFAM); IPR016040 (G3DSA:3.40.50.GENE3D); PTHR22981:SF44<br>(PANTHER); PTHR22981 (PANTHER); IPR002204 (PROSITE_PATTERNS);<br>CYTOPLASMIC_DOMAIN (PHOBIUS); NON_CYTOPLASMIC_DOMAIN<br>(PHOBIUS); TRANSMEMBRANE (PHOBIUS); SSF51735 (SUPERFAMILY)                                                                                                                                                                                                                                                                                                                                                                                                                                                                                                                                                                                                                                                                                                                                                                                               |
| 964 | c27644_g1_i1_len_1864_path_1931_0_454_2386<br>_455_511_2442_512_513_66_514_591_2521_59<br>2_1191_18_1192_11_0 | 300 | notchless protein homolog 1            | 615 | 5.39E-169 | 79.80% | 0.119 | IPR020472 (PRINTS); IPR001680 (SMART); IPR012972 (PFAM); IPR015943<br>(G3DSA:2.130.10.GENE3D); IPR001680 (PFAM); PTHR19848 (PANTHER);<br>PTHR19848:SF0 (PANTHER); IPR019775 (PROSITE_PATTERNS); IPR019775<br>(PROSITE_PATTERNS); NON_CYTOPLASMIC_DOMAIN (PHOBIUS);<br>TRANSMEMBRANE (PHOBIUS); CYTOPLASMIC_DOMAIN (PHOBIUS);<br>IPR017986 (PROSITE_PROFILES); IPR001680 (PROSITE_PROFILES);<br>IPR001680 (PROSITE_PROFILES); IPR001680 (PROSITE_PROFILES);<br>IPR001680 (PROSITE_PROFILES); IPR017986 (SUPERFAMILY); TMhelix<br>(TMHMM)                                                                                                                                                                                                                                                                                                                                                                                                                                                                                                                 |
| 965 | c27644_g1_i1_len_1864_path_1931_0_454_2386<br>_455_511_2442_512_513_66_514_591_2521_59<br>2_1191_18_1192_11_1 | 300 | notchless protein homolog 1 isoform x2 | 615 | 5.69E-69  | 89.80% | 0.106 | IPR001632 (PRINTS); IPR020472 (PRINTS); IPR001680 (SMART); IPR001680<br>(PFAM); IPR015943 (G3DSA:2.130.10.GENE3D); PTHR19848 (PANTHER);<br>PTHR19848:SF0 (PANTHER); IPR019775 (PROSITE_PATTERNS); IPR019775<br>(PROSITE_PATTERNS); IPR017986 (PROSITE_PROFILES); IPR001680<br>(PROSITE_PROFILES); IPR001680 (PROSITE_PROFILES); IPR001680<br>(PROSITE_PROFILES); IPR017986 (SUPERFAMILY)                                                                                                                                                                                                                                                                                                                                                                                                                                                                                                                                                                                                                                                                |
| 966 | c27644_g1_i2_len_1055_path_1931_0_454_2521<br>_455_1054_1                                                     | 45  | notchless protein homolog 1 isoform x1 | 352 | 2.37E-96  | 80.80% | 0.106 | IPR001680 (SMART); IPR015943 (G3DSA:2.130.10.GENE3D); IPR001680<br>(PFAM); PTHR19848 (PANTHER); PTHR19848:SF0 (PANTHER); IPR019775<br>(PROSITE_PATTERNS); IPR001680 (PROSITE_PROFILES); IPR001680<br>(PROSITE_PROFILES); IPR001680 (PROSITE_PROFILES); IPR017986<br>(PROSITE_PROFILES); IPR017986 (SUPERFAMILY)                                                                                                                                                                                                                                                                                                                                                                                                                                                                                                                                                                                                                                                                                                                                         |
| 967 | c27655_g1_i1_len_2712_path_2123_0_1633_516<br>8_1634_1650_3757_1651_1750_3857_1751_183<br>8_3945_1839_2137_0  | 340 | agap005714-pa-like protein             | 897 | 6.51E-146 | 53.90% | 0.099 | IPR000742 (SMART); IPR000436 (SMART); IPR001881 (SMART); PF14670<br>(PFAM); G3DSA:2.10.70.10 (GENE3D); IPR003410 (PFAM); G3DSA:2.10.25.10<br>(GENE3D); IPR001881 (PFAM); IPR023413 (G3DSA:2.40.155.GENE3D);<br>G3DSA:2.10.25.10 (GENE3D); G3DSA:2.10.25.10 (GENE3D);<br>G3DSA:2.10.25.10 (GENE3D); IPR000436 (PFAM); G3DSA:2.10.70.10<br>(GENE3D); PTHR24034 (PANTHER); IPR000152 (PROSITE_PATTERNS);<br>IPR000152 (PROSITE_PATTERNS); IPR013032 (PROSITE_PATTERNS);<br>IPR013032 (PROSITE_PATTERNS); IPR018097 (PROSITE_PATTERNS);<br>IPR013032 (PROSITE_PATTERNS); IPR013032 (PROSITE_PATTERNS);<br>IPR018097 (PROSITE_PATTERNS); IPR000152 (PROSITE_PATTERNS);<br>IPR000742 (PROSITE_PROFILES); IPR000436 (PROSITE_PROFILES);<br>IPR000436 (PROSITE_PROFILES); IPR000742 (PROSITE_PROFILES);<br>IPR000742 (PROSITE_PROFILES); IPR003410 (PROSITE_PROFILES);<br>IPR000742 (PROSITE_PROFILES); SSF57196 (SUPERFAMILY); SSF57196<br>(SUPERFAMILY); SSF57196 (SUPERFAMILY); IPR009030 (SUPERFAMILY);<br>IPR000436 (SUPERFAMILY); IPR000436 (SUPERFAMILY) |
| 968 | c27655_g1_i2_len_2607_path_2123_0_1633_375<br>7_1634_1733_3945_1734_2032_4244_2033_221<br>0_5960_2211_2211_0  | 383 | agap005714-pa-like protein             | 862 | 5.82E-152 | 53.60% | 0.099 | IPR000436 (SMART); IPR001881 (SMART); IPR000742 (SMART);<br>G3DSA:2.10.70.10 (GENE3D); G3DSA:2.10.25.10 (GENE3D); IPR023413<br>(G3DSA:2.40.155.GENE3D); IPR000436 (PFAM); G3DSA:2.10.70.10 (GENE3D);<br>PF14670 (PFAM); G3DSA:2.10.25.10 (GENE3D); IPR003410 (PFAM);<br>IPR001881 (PFAM); G3DSA:2.10.25.10 (GENE3D); G3DSA:2.10.25.10<br>(GENE3D); PTHR24034 (PANTHER); IPR013032 (PROSITE_PATTERNS);<br>IPR018097 (PROSITE_PATTERNS); IPR000152 (PROSITE_PATTERNS);<br>IPR000152 (PROSITE_PATTERNS); IPR000152 (PROSITE_PATTERNS);<br>IPR013032 (PROSITE_PATTERNS); IPR013032 (PROSITE_PATTERNS);<br>IPR013032 (PROSITE_PATTERNS); IPR018097 (PROSITE_PATTERNS);<br>IPR000436 (PROSITE_PROFILES); IPR000742 (PROSITE_PROFILES);<br>IPR000742 (PROSITE_PROFILES); IPR000436 (PROSITE_PROFILES);<br>IPR000742 (PROSITE_PROFILES); IPR003410 (PROSITE_PROFILES);<br>IPR000742 (PROSITE_PROFILES); SSF57196 (SUPERFAMILY); SSF57196<br>(SUPERFAMILY); SSF57196 (SUPERFAMILY); IPR000436 (SUPERFAMILY);<br>IPR009030 (SUPERFAMILY); IPR000436 (SUPERFAMILY) |

|     |                                                                                                              |       |                                                             |     |           |        |       |                                                                                                                                                                                                                                                                                                                                                                                                                                                                                                                                                                                                                                                                                                                                                                                                                                                                                                                                                                                                                                                                                                                      |
|-----|--------------------------------------------------------------------------------------------------------------|-------|-------------------------------------------------------------|-----|-----------|--------|-------|----------------------------------------------------------------------------------------------------------------------------------------------------------------------------------------------------------------------------------------------------------------------------------------------------------------------------------------------------------------------------------------------------------------------------------------------------------------------------------------------------------------------------------------------------------------------------------------------------------------------------------------------------------------------------------------------------------------------------------------------------------------------------------------------------------------------------------------------------------------------------------------------------------------------------------------------------------------------------------------------------------------------------------------------------------------------------------------------------------------------|
| 969 | c27655_g1_i3_len_2624_path_2123_0_1633_516<br>8_1634_1650_3757_1651_1750_3945_1751_204<br>9_4244_2050_2227_0 | 316   | agap005714-pa-like protein                                  | 868 | 3.25E-146 | 53.90% | 0.099 | IPR000436 (SMART); IPR000742 (SMART); IPR001881 (SMART); IPR001881 (PFAM); G3DSA:2.10.25.10 (GENE3D); IPR000436 (PFAM); G3DSA:2.10.25.10 (GENE3D); IPR003410 (PFAM); IPR023413 (G3DSA:2.40.155.GENE3D); G3DSA:2.10.25.10 (GENE3D); G3DSA:2.10.25.10 (GENE3D); PF14670 (PFAM); G3DSA:2.10.70.10 (GENE3D); G3DSA:2.10.70.10 (GENE3D); PTHR24034 (PANTHER); IPR018097 (PROSITE_PATTERNS); IPR013032 (PROSITE_PATTERNS); IPR018097 (PROSITE_PATTERNS); IPR000152 (PROSITE_PATTERNS); IPR000152 (PROSITE_PATTERNS); IPR013032 (PROSITE_PATTERNS); IPR000152 (PROSITE_PATTERNS); IPR013032 (PROSITE_PATTERNS); IPR000152 (PROSITE_PATTERNS); IPR013032 (PROSITE_PATTERNS); TRANSMEMBRANE (PHOBIUS); NON_CYTOPLASMIC_DOMAIN (PHOBIUS); CYTOPLASMIC_DOMAIN (PHOBIUS); IPR000436 (PROSITE_PROFILES); IPR003410 (PROSITE_PROFILES); IPR000436 (PROSITE_PROFILES); IPR000742 (PROSITE_PROFILES); IPR000742 (PROSITE_PROFILES); IPR000742 (PROSITE_PROFILES); SSF57196 (SUPERFAMILY); SSF57196 (SUPERFAMILY); IPR000436 (SUPERFAMILY); IPR009030 (SUPERFAMILY); IPR000436 (SUPERFAMILY); SSF57196 (SUPERFAMILY); TMhelix (TMHMM) |
| 970 | c27655_g1_i4_len_2695_path_2123_0_1633_375<br>7_1634_1733_3857_1734_1821_3945_1822_212<br>0_4244_2121_2298_0 | 381   | agap005714-pa-like protein                                  | 892 | 8.45E-156 | 52.70% | 0.099 | IPR000742 (SMART); IPR001881 (SMART); IPR000436 (SMART); IPR023413 (G3DSA:2.40.155.GENE3D); IPR003410 (PFAM); PF14670 (PFAM); G3DSA:2.10.70.10 (GENE3D); IPR001881 (PFAM); G3DSA:2.10.25.10 (GENE3D); G3DSA:2.10.25.10 (GENE3D); G3DSA:2.10.70.10 (GENE3D); IPR000436 (PFAM); G3DSA:2.10.25.10 (GENE3D); PTHR24034 (PANTHER); IPR013032 (PROSITE_PATTERNS); IPR000152 (PROSITE_PATTERNS); IPR013032 (PROSITE_PATTERNS); IPR018097 (PROSITE_PATTERNS); IPR013032 (PROSITE_PATTERNS); IPR000152 (PROSITE_PATTERNS); IPR018097 (PROSITE_PATTERNS); IPR013032 (PROSITE_PATTERNS); IPR000152 (PROSITE_PATTERNS); TRANSMEMBRANE (PHOBIUS); NON_CYTOPLASMIC_DOMAIN (PHOBIUS); CYTOPLASMIC_DOMAIN (PHOBIUS); IPR000742 (PROSITE_PROFILES); IPR000742 (PROSITE_PROFILES); IPR000436 (PROSITE_PROFILES); IPR000742 (PROSITE_PROFILES); IPR003410 (PROSITE_PROFILES); IPR000436 (PROSITE_PROFILES); IPR009030 (SUPERFAMILY); IPR000436 (SUPERFAMILY); SSF57196 (SUPERFAMILY); SSF57196 (SUPERFAMILY); IPR000436 (SUPERFAMILY); SSF57196 (SUPERFAMILY)                                                                           |
| 971 | c27666_g1_i1_len_2487_path_2967_0_2486_3                                                                     | 17601 | membrane metallo-endopeptidase-like 1-like                  | 821 | 0         | 67.90% | 0.125 | IPR018497 (PRINTS); IPR024079 (G3DSA:3.40.390.GENE3D); IPR018497 (PFAM); IPR008753 (PFAM); IPR000718 (PANTHER); PTHR11733:SF113 (PANTHER); TRANSMEMBRANE (PHOBIUS); NON_CYTOPLASMIC_DOMAIN (PHOBIUS); CYTOPLASMIC_DOMAIN (PHOBIUS); TRANSMEMBRANE (PHOBIUS); NON_CYTOPLASMIC_DOMAIN (PHOBIUS); SSF55486 (SUPERFAMILY); TMhelix (TMHMM); TMhelix (TMHMM)                                                                                                                                                                                                                                                                                                                                                                                                                                                                                                                                                                                                                                                                                                                                                              |
| 972 | c27716_g1_i1_len_606_path_950_0_423_1374_4<br>24_474_1425_475_605_1                                          | 603   | atrial natriuretic peptide-converting enzyme                | 197 | 3.67E-13  | 52.50% | 0.104 | IPR002172 (PRINTS); IPR002172 (SMART); IPR002172 (PFAM); IPR002172 (G3DSA:4.10.400.GENE3D); IPR002172 (G3DSA:4.10.400.GENE3D); PTHR10529 (PANTHER); PTHR10529:SF208 (PANTHER); IPR023415 (PROSITE_PATTERNS); IPR002172 (PROSITE_PROFILES); IPR002172 (PROSITE_PROFILES); IPR002172 (SUPERFAMILY); IPR002172 (SUPERFAMILY)                                                                                                                                                                                                                                                                                                                                                                                                                                                                                                                                                                                                                                                                                                                                                                                            |
| 973 | c27718_g2_i1_len_1344_path_3041_0_934_77_9<br>35_1343_5                                                      | 81    | peptidyl-prolyl cis-trans isomerase nima-interacting 1-like | 448 | 4.42E-70  | 85.10% | 0.102 | Coil (COILS); IPR001202 (SMART); IPR000297 (PFAM); G3DSA:3.10.50.40 (GENE3D); G3DSA:2.20.70.10 (GENE3D); IPR001202 (PFAM); PTHR10657 (PANTHER); IPR001202 (PROSITE_PATTERNS); IPR023058 (PROSITE_PATTERNS); NON_CYTOPLASMIC_DOMAIN (PHOBIUS); NON_CYTOPLASMIC_DOMAIN (PHOBIUS); TRANSMEMBRANE (PHOBIUS); TRANSMEMBRANE (PHOBIUS); CYTOPLASMIC_DOMAIN (PHOBIUS); TRANSMEMBRANE (PHOBIUS); TRANSMEMBRANE (PHOBIUS); CYTOPLASMIC_DOMAIN (PHOBIUS); NON_CYTOPLASMIC_DOMAIN (PHOBIUS); CYTOPLASMIC_DOMAIN (PHOBIUS); IPR000297 (PROSITE_PROFILES); IPR001202 (PROSITE_PROFILES); SSF54534 (SUPERFAMILY); IPR001202 (SUPERFAMILY); TMhelix (TMHMM)                                                                                                                                                                                                                                                                                                                                                                                                                                                                         |

|     |                                                                                                         |      |                                                    |     |           |        |         |                                                                                                                                                                                                                                                                                                                                                                                                                                                                                                       |
|-----|---------------------------------------------------------------------------------------------------------|------|----------------------------------------------------|-----|-----------|--------|---------|-------------------------------------------------------------------------------------------------------------------------------------------------------------------------------------------------------------------------------------------------------------------------------------------------------------------------------------------------------------------------------------------------------------------------------------------------------------------------------------------------------|
| 974 | c27732_g1_i1_len_1242_path_3129_0_40_1858_41_821_130_822_1241_0                                         | 162  | ferritin 2 light chain homologue                   | 414 | 4.28E-35  | 53.70% | 0.621 Y | IPR012347 (G3DSA:1.20.1260.GENE3D); IPR008331 (PFAM); IPR001519 (PANTHER); PTHR11431:SF28 (PANTHER); SIGNAL_PEPTIDE_N_REGION (PHOBIUS); SIGNAL_PEPTIDE_H_REGION (PHOBIUS); CYTOPLASMIC_DOMAIN (PHOBIUS); NON_CYTOPLASMIC_DOMAIN (PHOBIUS); SIGNAL_PEPTIDE_C_REGION (PHOBIUS); SIGNAL_PEPTIDE (PHOBIUS); TRANSMEMBRANE (PHOBIUS); IPR009040 (PROSITE_PROFILES); SignalP-TM (SIGNALP_GRAM_POSITIVE); SignalP-noTM (SIGNALP_EUK); IPR009078 (SUPERFAMILY)                                                |
| 975 | c27732_g1_i2_len_1474_path_1585_0_272_1858_273_1053_130_1054_1473_1                                     | 226  | ferritin 2 light chain homologue                   | 491 | 8.54E-35  | 53.50% | 0.104   | IPR008331 (PFAM); IPR012347 (G3DSA:1.20.1260.GENE3D); IPR001519 (PANTHER); PTHR11431:SF28 (PANTHER); TRANSMEMBRANE (PHOBIUS); CYTOPLASMIC_DOMAIN (PHOBIUS); TRANSMEMBRANE (PHOBIUS); NON_CYTOPLASMIC_DOMAIN (PHOBIUS); CYTOPLASMIC_DOMAIN (PHOBIUS); IPR009040 (PROSITE_PROFILES); IPR009078 (SUPERFAMILY)                                                                                                                                                                                            |
| 976 | c27733_g1_i1_len_1340_path_1538_0_436_68_4_37_454_86_455_786_2319_787_788_111_789_1_316_3005_1317_133_1 | 1007 | projectin short variant                            | 441 | 4.57E-40  | 49.60% | 0.1     | IPR003599 (SMART); IPR003598 (SMART); IPR013783 (G3DSA:2.60.40.GENE3D); IPR013783 (G3DSA:2.60.40.GENE3D); IPR013098 (PFAM); IPR013783 (G3DSA:2.60.40.GENE3D); PTHR19897 (PANTHER); IPR007110 (PROSITE_PROFILES); IPR007110 (PROSITE_PROFILES); SSF48726 (SUPERFAMILY); SSF48726 (SUPERFAMILY); SSF48726 (SUPERFAMILY)                                                                                                                                                                                 |
| 977 | c27746_g1_i1_len_2350_path_1293_0_921_4036_922_1303_4418_1304_1381_4496_1382_1559_4674_1560_1561_46_1   | 253  | annexin b9-like isoform x1                         | 778 | 8.96E-133 | 60.00% | 0.208   | IPR001464 (PRINTS); IPR018502 (SMART); IPR018502 (PFAM); IPR018502 (G3DSA:1.10.220.GENE3D); IPR018502 (G3DSA:1.10.220.GENE3D); IPR018502 (G3DSA:1.10.220.GENE3D); PTHR10502 (PANTHER); IPR018252 (PROSITE_PATTERNS); IPR018252 (PROSITE_PATTERNS); TRANSMEMBRANE (PHOBIUS); NON_CYTOPLASMIC_DOMAIN (PHOBIUS); CYTOPLASMIC_DOMAIN (PHOBIUS); NON_CYTOPLASMIC_DOMAIN (PHOBIUS); TRANSMEMBRANE (PHOBIUS); CYTOPLASMIC_DOMAIN (PHOBIUS); TRANSMEMBRANE (PHOBIUS); SSF47874 (SUPERFAMILY); TMhelix (TMHMM) |
| 978 | c27749_g1_i1_len_1065_path_961_0_19_789_20_68_838_69_467_439_468_628_2602_629_1064_0                    | 1674 | low quality protein: glutathione peroxidase 1-like | 350 | 6.24E-87  | 79.30% | 0.138   | IPR000889 (PRINTS); IPR000889 (PFAM); IPR012336 (G3DSA:3.40.30.GENE3D); IPR000889 (PANTHER); PTHR11592:SF23 (PANTHER); IPR000889 (PROSITE_PROFILES); IPR012336 (SUPERFAMILY)                                                                                                                                                                                                                                                                                                                          |
| 979 | c27749_g1_i2_len_1067_path_767_0_21_789_22_70_838_71_469_439_470_630_2602_631_1066_2                    | 1690 | low quality protein: glutathione peroxidase 1-like | 350 | 6.24E-87  | 79.30% | 0.125   | IPR000889 (PRINTS); IPR000889 (PFAM); IPR012336 (G3DSA:3.40.30.GENE3D); PTHR11592:SF23 (PANTHER); IPR000889 (PANTHER); IPR000889 (PROSITE_PROFILES); IPR012336 (SUPERFAMILY)                                                                                                                                                                                                                                                                                                                          |
| 980 | c27749_g1_i3_len_1018_path_2023_0_21_838_2_2_420_439_421_581_2602_582_1017_1                            | 1796 | low quality protein: glutathione peroxidase 1-like | 334 | 8.55E-87  | 78.50% | 0.139   | IPR000889 (PRINTS); IPR012336 (G3DSA:3.40.30.GENE3D); IPR000889 (PFAM); PTHR11592:SF23 (PANTHER); IPR000889 (PANTHER); IPR000889 (PROSITE_PROFILES); IPR012336 (SUPERFAMILY)                                                                                                                                                                                                                                                                                                                          |
| 981 | c27749_g1_i4_len_552_path_185_0_190_3545_1_91_205_390_206_208_75_209_255_439_256_41_6_3583_417_437_36_0 | 162  | low quality protein: glutathione peroxidase 1-like | 179 | 1.46E-22  | 73.70% | 0.194   | IPR012336 (G3DSA:3.40.30.GENE3D); IPR000889 (PANTHER); PTHR11592:SF24 (PANTHER); TRANSMEMBRANE (PHOBIUS); CYTOPLASMIC_DOMAIN (PHOBIUS); NON_CYTOPLASMIC_DOMAIN (PHOBIUS); IPR012336 (SUPERFAMILY); TMhelix (TMHMM)                                                                                                                                                                                                                                                                                    |
| 982 | c27762_g1_i1_len_1579_path_43_0_929_973_93_0_1048_1092_1049_1050_1094_1051_1138_118_1_1139_1139_21_11_5 | 396  | dnaj homolog subfamily c member 9                  | 520 | 1.67E-85  | 75.60% | 0.115   | Coil (COILS); Coil (COILS); IPR001623 (PRINTS); IPR001623 (SMART); IPR001623 (G3DSA:1.10.287.GENE3D); IPR001623 (PFAM); PTHR24078 (PANTHER); PTHR24078:SF166 (PANTHER); IPR018253 (PROSITE_PATTERNS); CYTOPLASMIC_DOMAIN (PHOBIUS); TRANSMEMBRANE (PHOBIUS); CYTOPLASMIC_DOMAIN (PHOBIUS); TRANSMEMBRANE (PHOBIUS); NON_CYTOPLASMIC_DOMAIN (PHOBIUS); IPR001623 (PROSITE_PROFILES); IPR001623 (SUPERFAMILY); TMhelix (TMHMM); TMhelix (TMHMM); TMhelix (TMHMM)                                        |
| 983 | c27797_g1_i1_len_1903_path_155_0_21_29_22_82_4094_83_1902_1                                             | 293  | torsin-1b-like isoform x2                          | 628 | 8.52E-35  | 53.60% | 0.266   | IPR027417 (G3DSA:3.40.50.GENE3D); IPR010448 (PFAM); IPR010448 (PANTHER); IPR030553 (PTHR10760:PANTHER); CYTOPLASMIC_DOMAIN (PHOBIUS); TRANSMEMBRANE (PHOBIUS); NON_CYTOPLASMIC_DOMAIN (PHOBIUS); TRANSMEMBRANE (PHOBIUS); NON_CYTOPLASMIC_DOMAIN (PHOBIUS); TRANSMEMBRANE (PHOBIUS); CYTOPLASMIC_DOMAIN (PHOBIUS); IPR027417 (SUPERFAMILY); TMhelix (TMHMM); TMhelix (TMHMM)                                                                                                                          |
| 984 | c27797_g1_i2_len_1841_path_4022_0_20_4094_21_1840_2                                                     | 293  | torsin-1b-like isoform x2                          | 607 | 8.54E-35  | 53.20% | 0.271   | IPR027417 (G3DSA:3.40.50.GENE3D); IPR010448 (PFAM); IPR030553 (PTHR10760:PANTHER); IPR010448 (PANTHER); TRANSMEMBRANE (PHOBIUS); NON_CYTOPLASMIC_DOMAIN (PHOBIUS); CYTOPLASMIC_DOMAIN (PHOBIUS); CYTOPLASMIC_DOMAIN (PHOBIUS); TRANSMEMBRANE (PHOBIUS); IPR027417 (SUPERFAMILY); TMhelix (TMHMM); TMhelix (TMHMM); TMhelix (TMHMM)                                                                                                                                                                    |

|     |                                                                                                        |       |                                                                         |      |           |        |         |                                                                                                                                                                                                                                                                                                                                                                                                                                                                                                                                                                                       |
|-----|--------------------------------------------------------------------------------------------------------|-------|-------------------------------------------------------------------------|------|-----------|--------|---------|---------------------------------------------------------------------------------------------------------------------------------------------------------------------------------------------------------------------------------------------------------------------------------------------------------------------------------------------------------------------------------------------------------------------------------------------------------------------------------------------------------------------------------------------------------------------------------------|
| 985 | c27823_g1_i1_len_3207_path_1_0_254_256_255_2265_2267_2266_3206_2                                       | 243   | serine threonine-protein phosphatase 2a catalytic subunit alpha isoform | 1069 | 0         | 97.70% | 0.171   | Coil (COILS); IPR006186 (PRINTS); IPR006186 (SMART); IPR004843 (PFAM); IPR029052 (G3DSA:3.60.21.GENE3D); PTHR11668:SF216 (PANTHER); PTHR11668 (PANTHER); IPR006186 (PROSITE_PATTERNS); NON_CYTOPLASMIC_DOMAIN (PHOBIUS); CYTOPLASMIC_DOMAIN (PHOBIUS); TRANSMEMBRANE (PHOBIUS); NON_CYTOPLASMIC_DOMAIN (PHOBIUS); TRANSMEMBRANE (PHOBIUS); TRANSMEMBRANE (PHOBIUS); CYTOPLASMIC_DOMAIN (PHOBIUS); TRANSMEMBRANE (PHOBIUS); CYTOPLASMIC_DOMAIN (PHOBIUS); IPR029052 (SUPERFAMILY); TMhelix (TMHMM); TMhelix (TMHMM); TMhelix (TMHMM); TMhelix (TMHMM)                                  |
| 986 | c27844_g1_i1_len_483_path_1_0_146_148_147_175_944_176_246_1015_247_336_1105_337_48_2_3                 | 1398  | carboxypeptidase b                                                      | 161  | 5.36E-26  | 70.40% | 0.14    | G3DSA:3.40.630.10 (GENE3D); IPR000834 (PFAM); PTHR11705 (PANTHER); SSF53187 (SUPERFAMILY)                                                                                                                                                                                                                                                                                                                                                                                                                                                                                             |
| 987 | c27844_g1_i1_len_483_path_1_0_146_148_147_175_944_176_246_1015_247_336_1105_337_48_2_4                 | 1398  | carboxypeptidase b-like                                                 | 161  | 5.09E-27  | 75.70% | 0.195   | G3DSA:3.40.630.10 (GENE3D); IPR000834 (PFAM); PTHR11705 (PANTHER); TRANSMEMBRANE (PHOBIUS); CYTOPLASMIC_DOMAIN (PHOBIUS); NON_CYTOPLASMIC_DOMAIN (PHOBIUS); SSF53187 (SUPERFAMILY); TMhelix (TMHMM)                                                                                                                                                                                                                                                                                                                                                                                   |
| 988 | c27844_g2_i1_len_492_path_2133_0_155_148_1_56_184_177_185_491_4                                        | 1312  | carboxypeptidase b                                                      | 164  | 5.19E-65  | 69.40% | 0.12    | IPR000834 (SMART); IPR000834 (PFAM); G3DSA:3.40.630.10 (GENE3D); PTHR11705 (PANTHER); SSF53187 (SUPERFAMILY)                                                                                                                                                                                                                                                                                                                                                                                                                                                                          |
| 989 | c27856_g1_i3_len_1113_path_1853_0_142_1996_143_395_334_396_535_2607_536_1112_2                         | 194   | ankyrin repeat domain-containing protein 12-like isoform x1             | 371  | 1.43E-35  | 65.10% | 0.462 Y | IPR002110 (SMART); IPR020683 (G3DSA:1.25.40.GENE3D); IPR020683 (PFAM); PTHR24149 (PANTHER); IPR002110 (PROSITE_PROFILES); IPR020683 (PROSITE_PROFILES); IPR002110 (PROSITE_PROFILES); IPR020683 (SUPERFAMILY)                                                                                                                                                                                                                                                                                                                                                                         |
| 990 | c27856_g1_i4_len_1333_path_1853_0_142_1996_143_395_334_396_535_2388_536_538_468_53_9_755_2607_756_13_2 | 363   | ankyrin repeat domain-containing protein partial                        | 444  | 1.18E-48  | 71.40% | 0.462 Y | IPR002110 (SMART); IPR002110 (PFAM); IPR020683 (G3DSA:1.25.40.GENE3D); IPR020683 (PFAM); PTHR24149 (PANTHER); IPR002110 (PROSITE_PROFILES); IPR020683 (PROSITE_PROFILES); IPR002110 (PROSITE_PROFILES); IPR002110 (PROSITE_PROFILES); IPR020683 (SUPERFAMILY)                                                                                                                                                                                                                                                                                                                         |
| 991 | c27856_g1_i5_len_1261_path_3256_0_70_1996_71_323_334_324_463_2388_464_466_468_467_683_2607_684_1260_2  | 327   | ankyrin repeat domain-containing protein partial                        | 420  | 1.97E-49  | 66.20% | 0.252   | IPR002110 (SMART); IPR020683 (G3DSA:1.25.40.GENE3D); IPR020683 (PFAM); IPR002110 (PFAM); PTHR24149 (PANTHER); IPR002110 (PROSITE_PROFILES); IPR020683 (PROSITE_PROFILES); IPR002110 (PROSITE_PROFILES); IPR002110 (PROSITE_PROFILES); IPR020683 (SUPERFAMILY)                                                                                                                                                                                                                                                                                                                         |
| 992 | c27866_g1_i1_len_674_path_2403_0_4_2408_5_5_520_6_673_3                                                | 18    | dbh-like monooxygenase protein 1-like protein                           | 225  | 3.50E-15  | 66.70% | 0.177   | IPR005018 (PFAM); IPR000945 (PANTHER); PTHR10157:SF23 (PANTHER); NON_CYTOPLASMIC_DOMAIN (PHOBIUS); CYTOPLASMIC_DOMAIN (PHOBIUS); TRANSMEMBRANE (PHOBIUS); IPR005018 (PROSITE_PROFILES)                                                                                                                                                                                                                                                                                                                                                                                                |
| 993 | c27869_g2_i1_len_1688_path_3725_0_170_1621_171_374_5600_375_375_1826_376_510_1961_511_1687_1           | 151   | wd repeat domain-containing protein 83                                  | 551  | 5.62E-139 | 80.10% | 0.114   | IPR020472 (PRINTS); IPR001680 (SMART); IPR001680 (PFAM); IPR015943 (G3DSA:2.130.10.GENE3D); PTHR22842 (PANTHER); IPR019775 (PROSITE_PATTERNS); CYTOPLASMIC_DOMAIN (PHOBIUS); CYTOPLASMIC_DOMAIN (PHOBIUS); TRANSMEMBRANE (PHOBIUS); TRANSMEMBRANE (PHOBIUS); TRANSMEMBRANE (PHOBIUS); NON_CYTOPLASMIC_DOMAIN (PHOBIUS); CYTOPLASMIC_DOMAIN (PHOBIUS); NON_CYTOPLASMIC_DOMAIN (PHOBIUS); TRANSMEMBRANE (PHOBIUS); IPR001680 (PROSITE_PROFILES); IPR017986 (PROSITE_PROFILES); IPR001680 (PROSITE_PROFILES); IPR017986 (SUPERFAMILY); TMhelix (TMHMM); TMhelix (TMHMM); TMhelix (TMHMM) |
| 994 | c27869_g2_i2_len_1444_path_1558_0_62_1621_63_266_1961_267_1443_2                                       | 149   | wd repeat domain-containing protein 83                                  | 475  | 5.59E-99  | 78.30% | 0.454 Y | IPR020472 (PRINTS); IPR001680 (SMART); IPR001680 (PFAM); IPR015943 (G3DSA:2.130.10.GENE3D); PTHR22842 (PANTHER); IPR019775 (PROSITE_PATTERNS); NON_CYTOPLASMIC_DOMAIN (PHOBIUS); TRANSMEMBRANE (PHOBIUS); TRANSMEMBRANE (PHOBIUS); CYTOPLASMIC_DOMAIN (PHOBIUS); CYTOPLASMIC_DOMAIN (PHOBIUS); NON_CYTOPLASMIC_DOMAIN (PHOBIUS); IPR001680 (PROSITE_PROFILES); IPR017986 (PROSITE_PROFILES); SignalP-noTM (SIGNALP_EUK); IPR017986 (SUPERFAMILY); TMhelix (TMHMM); TMhelix (TMHMM); TMhelix (TMHMM)                                                                                   |
| 995 | c27884_g1_i1_len_424_path_1_0_423_2                                                                    | 17222 | aael000389- partial                                                     | 141  | 6.37E-29  | 73.00% | 0.274   | IPR013781 (G3DSA:3.20.20.GENE3D); IPR001223 (PFAM); PTHR11177 (PANTHER); PTHR11177:SF112 (PANTHER); TRANSMEMBRANE (PHOBIUS); NON_CYTOPLASMIC_DOMAIN (PHOBIUS); CYTOPLASMIC_DOMAIN (PHOBIUS); IPR017853 (SUPERFAMILY); TMhelix (TMHMM)                                                                                                                                                                                                                                                                                                                                                 |

|      |                                                                                              |        |                                              |     |           |        |         |                                                                                                                                                                                                                                                                                                                                                                                                                                                                                                                                            |
|------|----------------------------------------------------------------------------------------------|--------|----------------------------------------------|-----|-----------|--------|---------|--------------------------------------------------------------------------------------------------------------------------------------------------------------------------------------------------------------------------------------------------------------------------------------------------------------------------------------------------------------------------------------------------------------------------------------------------------------------------------------------------------------------------------------------|
| 996  | c2789_g1_i1_len_548_path_526_0_438_965_439_547_0                                             | 23     | kunitz and ntr domain-containing protein 2   | 183 | 4.55E-15  | 68.20% | 0.467 Y | IPR002223 (PRINTS); IPR002223 (SMART); IPR002223 (PFAM); IPR002223 (G3DSA:4.10.410.GENE3D); PTHR10083 (PANTHER); IPR020901 (PROSITE_PATTERNS); NON_CYTOPLASMIC_DOMAIN (PHOBIUS); TRANSMEMBRANE (PHOBIUS); CYTOPLASMIC_DOMAIN (PHOBIUS); IPR002223 (PROSITE_PROFILES); IPR002223 (SUPERFAMILY); TMhelix (TMHMM)                                                                                                                                                                                                                             |
| 997  | c2789_g1_i2_len_493_path_526_0_438_1074_439_492_0                                            | 18     | protease inhibitor-like                      | 165 | 1.65E-15  | 67.40% | 0.467 Y | IPR002223 (PRINTS); IPR002223 (SMART); IPR002223 (PFAM); IPR002223 (G3DSA:4.10.410.GENE3D); PTHR10083 (PANTHER); IPR020901 (PROSITE_PATTERNS); TRANSMEMBRANE (PHOBIUS); CYTOPLASMIC_DOMAIN (PHOBIUS); NON_CYTOPLASMIC_DOMAIN (PHOBIUS); IPR002223 (PROSITE_PROFILES); IPR002223 (SUPERFAMILY); TMhelix (TMHMM)                                                                                                                                                                                                                             |
| 998  | c27942_g1_i1_len_1746_path_1878_0_99_1978_100_783_2657_784_785_102_786_1745_2                | 559    | alpha-aminoadipic semialdehyde dehydrogenase | 576 | 0         | 83.70% | 0.17    | IPR016163 (G3DSA:3.40.309.GENE3D); IPR016162 (G3DSA:3.40.605.GENE3D); IPR015590 (PFAM); PTHR11699 (PANTHER); PTHR11699:SF144 (PANTHER); IPR029510 (PROSITE_PATTERNS); IPR016161 (SUPERFAMILY)                                                                                                                                                                                                                                                                                                                                              |
| 999  | c27960_g1_i1_len_1144_path_343_0_813_1151_814_822_340_823_900_1236_901_910_196_911_1143_0    | 316580 | plasma kallikrein                            | 382 | 4.99E-53  | 55.90% | 0.444 Y | IPR001314 (PRINTS); IPR001254 (SMART); G3DSA:2.40.10.10 (GENE3D); G3DSA:2.40.10.10 (GENE3D); IPR001254 (PFAM); PTHR24265 (PANTHER); IPR018114 (PROSITE_PATTERNS); IPR018114 (PROSITE_PATTERNS); SIGNAL_PEPTIDE_H_REGION (PHOBIUS); SIGNAL_PEPTIDE (PHOBIUS); SIGNAL_PEPTIDE_C_REGION (PHOBIUS); NON_CYTOPLASMIC_DOMAIN (PHOBIUS); SIGNAL_PEPTIDE_N_REGION (PHOBIUS); IPR001254 (PROSITE_PROFILES); IPR009003 (SUPERFAMILY)                                                                                                                 |
| 1000 | c27977_g1_i1_len_965_path_1031_0_403_2055_404_538_2352_539_928_1822_929_964_1                | 90     | peptidyl-prolyl cis-trans isomerase-like 1   | 322 | 6.28E-92  | 71.30% | 0.153   | IPR002130 (PRINTS); IPR029000 (G3DSA:2.40.100.GENE3D); IPR029000 (G3DSA:2.40.100.GENE3D); IPR002130 (PFAM); IPR024936 (PANTHER); IPR020892 (PROSITE_PATTERNS); IPR002130 (PROSITE_PROFILES); IPR029000 (SUPERFAMILY); IPR029000 (SUPERFAMILY)                                                                                                                                                                                                                                                                                              |
| 1001 | c27977_g1_i2_len_831_path_1031_0_403_2352_404_793_1821_794_794_1822_795_830_1                | 251    | peptidyl-prolyl cis-trans isomerase-like 1   | 265 | 1.48E-100 | 91.30% | 0.153   | IPR002130 (PRINTS); IPR002130 (PFAM); IPR029000 (G3DSA:2.40.100.GENE3D); IPR024936 (PANTHER); IPR020892 (PROSITE_PATTERNS); IPR002130 (PROSITE_PROFILES); IPR029000 (SUPERFAMILY)                                                                                                                                                                                                                                                                                                                                                          |
| 1002 | c27978_g1_i1_len_1466_path_3566_0_93_1742_94_250_3978_251_256_1905_257_1465_2                | 355    | leucine-rich repeat-containing protein 57    | 483 | 1.11E-96  | 75.60% | 0.268   | IPR003591 (SMART); IPR001611 (PFAM); IPR025875 (PFAM); G3DSA:3.80.10.10 (GENE3D); G3DSA:3.80.10.10 (GENE3D); PTHR23155 (PANTHER); TRANSMEMBRANE (PHOBIUS); TRANSMEMBRANE (PHOBIUS); NON_CYTOPLASMIC_DOMAIN (PHOBIUS); CYTOPLASMIC_DOMAIN (PHOBIUS); CYTOPLASMIC_DOMAIN (PHOBIUS); TRANSMEMBRANE (PHOBIUS); NON_CYTOPLASMIC_DOMAIN (PHOBIUS); IPR001611 (PROSITE_PROFILES); IPR001611 (PROSITE_PROFILES); IPR001611 (PROSITE_PROFILES); IPR001611 (PROSITE_PROFILES); IPR001611 (PROSITE_PROFILES); SSF52058 (SUPERFAMILY); TMhelix (TMHMM) |
| 1003 | c27978_g1_i3_len_1694_path_1546_0_195_1742_196_352_3156_353_478_3978_479_484_1905_485_1693_2 | 340    | leucine-rich repeat-containing protein 57    | 559 | 2.16E-93  | 76.10% | 0.218   | IPR003591 (SMART); IPR001611 (PFAM); G3DSA:3.80.10.10 (GENE3D); IPR025875 (PFAM); PTHR23155 (PANTHER); NON_CYTOPLASMIC_DOMAIN (PHOBIUS); TRANSMEMBRANE (PHOBIUS); NON_CYTOPLASMIC_DOMAIN (PHOBIUS); CYTOPLASMIC_DOMAIN (PHOBIUS); TRANSMEMBRANE (PHOBIUS); IPR001611 (PROSITE_PROFILES); IPR001611 (PROSITE_PROFILES); IPR001611 (PROSITE_PROFILES); IPR001611 (PROSITE_PROFILES); IPR001611 (PROSITE_PROFILES); SSF52058 (SUPERFAMILY); TMhelix (TMHMM)                                                                                   |
| 1004 | c27978_g1_i4_len_1592_path_3566_0_93_1742_94_250_3156_251_376_3978_377_382_1905_383_1591_2   | 333    | leucine-rich repeat-containing protein 57    | 525 | 5.64E-94  | 76.10% | 0.268   | IPR003591 (SMART); IPR001611 (PFAM); G3DSA:3.80.10.10 (GENE3D); G3DSA:3.80.10.10 (GENE3D); IPR025875 (PFAM); PTHR23155 (PANTHER); CYTOPLASMIC_DOMAIN (PHOBIUS); NON_CYTOPLASMIC_DOMAIN (PHOBIUS); TRANSMEMBRANE (PHOBIUS); TRANSMEMBRANE (PHOBIUS); NON_CYTOPLASMIC_DOMAIN (PHOBIUS); CYTOPLASMIC_DOMAIN (PHOBIUS); TRANSMEMBRANE (PHOBIUS); IPR001611 (PROSITE_PROFILES); IPR001611 (PROSITE_PROFILES); IPR001611 (PROSITE_PROFILES); IPR001611 (PROSITE_PROFILES); IPR001611 (PROSITE_PROFILES); SSF52058 (SUPERFAMILY); TMhelix (TMHMM) |



|      |                                                                                                         |      |                                                                                                                      |     |           |        |       |                                                                                                                                                                                                                                                                                                                                                                                                                                                                                                                                                                                                                                                                         |
|------|---------------------------------------------------------------------------------------------------------|------|----------------------------------------------------------------------------------------------------------------------|-----|-----------|--------|-------|-------------------------------------------------------------------------------------------------------------------------------------------------------------------------------------------------------------------------------------------------------------------------------------------------------------------------------------------------------------------------------------------------------------------------------------------------------------------------------------------------------------------------------------------------------------------------------------------------------------------------------------------------------------------------|
| 1005 | c27978_g1_i5_len_1568_path_1546_0_195_1742_196_352_3978_353_358_1905_359_1567_2                         | 382  | leucine-rich repeat-containing protein 57                                                                            | 517 | 4.86E-96  | 75.60% | 0.218 | IPR003591 (SMART); IPR025875 (PFAM); G3DSA:3.80.10.10 (GENE3D); G3DSA:3.80.10.10 (GENE3D); IPR001611 (PFAM); PTHR23155 (PANTHER); TRANSMEMBRANE (PHOBIUS); CYTOPLASMIC_DOMAIN (PHOBIUS); NON_CYTOPLASMIC_DOMAIN (PHOBIUS); TRANSMEMBRANE (PHOBIUS); TRANSMEMBRANE (PHOBIUS); NON_CYTOPLASMIC_DOMAIN (PHOBIUS); CYTOPLASMIC_DOMAIN (PHOBIUS); IPR001611 (PROSITE_PROFILES); IPR001611 (PROSITE_PROFILES); IPR001611 (PROSITE_PROFILES); IPR001611 (PROSITE_PROFILES); IPR001611 (PROSITE_PROFILES); SSF52058 (SUPERFAMILY); TMhelix (TMHMM)                                                                                                                              |
| 1006 | c27990_g1_i1_len_1575_path_321_0_311_100_3_12_1574_4                                                    | 319  | receptor-type tyrosine-protein phosphatase n2                                                                        | 515 | 0         | 86.40% | 0.232 | IPR000242 (PRINTS); IPR003595 (SMART); IPR000242 (SMART); IPR000242 (PFAM); IPR029021 (G3DSA:3.90.190.GENE3D); PTHR19134 (PANTHER); PTHR19134:SF2 (PANTHER); IPR016130 (PROSITE_PATTERNS); CYTOPLASMIC_DOMAIN (PHOBIUS); TRANSMEMBRANE (PHOBIUS); NON_CYTOPLASMIC_DOMAIN (PHOBIUS); IPR000387 (PROSITE_PROFILES); IPR000242 (PROSITE_PROFILES); IPR029021 (SUPERFAMILY); TMhelix (TMHMM)                                                                                                                                                                                                                                                                                |
| 1007 | c27990_g1_i2_len_2998_path_321_0_311_632_3_12_779_268_780_1734_100_1735_2997_4                          | 2414 | receptor-type tyrosine-protein phosphatase n2                                                                        | 989 | 0         | 87.30% | 0.232 | IPR000242 (PRINTS); IPR000242 (SMART); IPR003595 (SMART); IPR000242 (PFAM); IPR029021 (G3DSA:3.90.190.GENE3D); PTHR19134:SF2 (PANTHER); PTHR19134 (PANTHER); IPR016130 (PROSITE_PATTERNS); TRANSMEMBRANE (PHOBIUS); NON_CYTOPLASMIC_DOMAIN (PHOBIUS); NON_CYTOPLASMIC_DOMAIN (PHOBIUS); TRANSMEMBRANE (PHOBIUS); CYTOPLASMIC_DOMAIN (PHOBIUS); IPR000242 (PROSITE_PROFILES); IPR000387 (PROSITE_PROFILES); IPR029021 (SUPERFAMILY); TMhelix (TMHMM); TMhelix (TMHMM)                                                                                                                                                                                                    |
| 1008 | c28000_g2_i1_len_1299_path_1487_0_459_1947_460_596_2084_597_641_1375_642_714_1448_715_746_2231_747_0    | 347  | huga_polan ame: full=hyaluronidase short=hya ame: full=hyaluronoglucosaminidase ame: allergen=pol a 2 flags: partial | 433 | 6.05E-73  | 57.40% | 0.254 | IPR018155 (PRINTS); IPR013785 (G3DSA:3.20.20.GENE3D); IPR018155 (PFAM); IPR018155 (PANTHER); PTHR11769:SF8 (PANTHER); TRANSMEMBRANE (PHOBIUS); NON_CYTOPLASMIC_DOMAIN (PHOBIUS); CYTOPLASMIC_DOMAIN (PHOBIUS); IPR017853 (SUPERFAMILY)                                                                                                                                                                                                                                                                                                                                                                                                                                  |
| 1009 | c28000_g2_i2_len_1299_path_1487_0_459_4306_460_550_1486_551_596_2084_597_641_2128_642_714_1448_715_0    | 630  | hyaluronidase-like                                                                                                   | 433 | 9.52E-74  | 56.90% | 0.254 | IPR018155 (PRINTS); IPR018155 (PFAM); IPR013785 (G3DSA:3.20.20.GENE3D); PTHR11769:SF8 (PANTHER); IPR018155 (PANTHER); NON_CYTOPLASMIC_DOMAIN (PHOBIUS); TRANSMEMBRANE (PHOBIUS); CYTOPLASMIC_DOMAIN (PHOBIUS); IPR017853 (SUPERFAMILY)                                                                                                                                                                                                                                                                                                                                                                                                                                  |
| 1010 | c28011_g1_i1_len_2870_path_2848_0_1818_466_7_1819_1820_4669_1821_1870_4719_1871_187_1_4720_1872_2240_2  | 635  | hemocytin isoform x1                                                                                                 | 951 | 3.85E-26  | 41.20% | 0.118 | TRANSMEMBRANE (PHOBIUS); NON_CYTOPLASMIC_DOMAIN (PHOBIUS); NON_CYTOPLASMIC_DOMAIN (PHOBIUS); TRANSMEMBRANE (PHOBIUS); CYTOPLASMIC_DOMAIN (PHOBIUS); IPR006207 (PROSITE_PROFILES); TMhelix (TMHMM); TMhelix (TMHMM)                                                                                                                                                                                                                                                                                                                                                                                                                                                      |
| 1011 | c28023_g1_i1_len_1812_path_53_0_580_634_58_1_581_635_582_740_794_741_742_796_743_91_5_969_916_919_973_2 | 482  | reticulocalbin-2                                                                                                     | 598 | 3.85E-131 | 73.80% | 0.308 | IPR002048 (SMART); IPR011992 (G3DSA:1.10.238.GENE3D); IPR011992 (PFAM); PTHR10827:SF48 (PANTHER); PTHR10827 (PANTHER); IPR018247 (PROSITE_PATTERNS); IPR018247 (PROSITE_PATTERNS); IPR018247 (PROSITE_PATTERNS); IPR018247 (PROSITE_PATTERNS); IPR018247 (PROSITE_PATTERNS); NON_CYTOPLASMIC_DOMAIN (PHOBIUS); NON_CYTOPLASMIC_DOMAIN (PHOBIUS); TRANSMEMBRANE (PHOBIUS); CYTOPLASMIC_DOMAIN (PHOBIUS); TRANSMEMBRANE (PHOBIUS); IPR002048 (PROSITE_PROFILES); IPR002048 (PROSITE_PROFILES); IPR002048 (PROSITE_PROFILES); IPR002048 (PROSITE_PROFILES); IPR002048 (PROSITE_PROFILES); SSF47473 (SUPERFAMILY); SSF47473 (SUPERFAMILY); TMhelix (TMHMM); TMhelix (TMHMM) |
| 1012 | c28024_g3_i1_len_1205_path_7135_0_139_4139_140_1204_4                                                   | 71   | acyl- delta desaturase                                                                                               | 402 | 5.69E-104 | 70.80% | 0.178 | IPR015876 (PRINTS); IPR005804 (PFAM); PTHR11351 (PANTHER); CYTOPLASMIC_DOMAIN (PHOBIUS); NON_CYTOPLASMIC_DOMAIN (PHOBIUS); NON_CYTOPLASMIC_DOMAIN (PHOBIUS); TRANSMEMBRANE (PHOBIUS); TRANSMEMBRANE (PHOBIUS); CYTOPLASMIC_DOMAIN (PHOBIUS); TRANSMEMBRANE (PHOBIUS); TRANSMEMBRANE (PHOBIUS); NON_CYTOPLASMIC_DOMAIN (PHOBIUS); TRANSMEMBRANE (PHOBIUS); CYTOPLASMIC_DOMAIN (PHOBIUS); TMhelix (TMHMM); TMhelix (TMHMM); TMhelix (TMHMM); TMhelix (TMHMM)                                                                                                                                                                                                              |

|      |                                                                                                        |       |                                      |     |           |        |         |                                                                                                                                                                                                                                                                                                                                                                                                                                                                                                                                                                                                                          |
|------|--------------------------------------------------------------------------------------------------------|-------|--------------------------------------|-----|-----------|--------|---------|--------------------------------------------------------------------------------------------------------------------------------------------------------------------------------------------------------------------------------------------------------------------------------------------------------------------------------------------------------------------------------------------------------------------------------------------------------------------------------------------------------------------------------------------------------------------------------------------------------------------------|
| 1013 | c28024_g3_i2_len_1789_path_3415_0_186_3602_187_723_4139_724_1788_4                                     | 171   | acyl- delta desaturase               | 596 | 1.77E-128 | 72.50% | 0.178   | IPR015876 (PRINTS); IPR005804 (PFAM); PTHR11351:SF28 (PANTHER); PTHR11351 (PANTHER); TRANSMEMBRANE (PHOBIUS); NON_CYTOPLASMIC_DOMAIN (PHOBIUS); TRANSMEMBRANE (PHOBIUS); TRANSMEMBRANE (PHOBIUS); CYTOPLASMIC_DOMAIN (PHOBIUS); NON_CYTOPLASMIC_DOMAIN (PHOBIUS); TRANSMEMBRANE (PHOBIUS); CYTOPLASMIC_DOMAIN (PHOBIUS); TRANSMEMBRANE (PHOBIUS); CYTOPLASMIC_DOMAIN (PHOBIUS); NON_CYTOPLASMIC_DOMAIN (PHOBIUS); TRANSMEMBRANE (PHOBIUS); NON_CYTOPLASMIC_DOMAIN (PHOBIUS); CYTOPLASMIC_DOMAIN (PHOBIUS); TMhelix (TMHMM); TMhelix (TMHMM); TMhelix (TMHMM); TMhelix (TMHMM)                                            |
| 1014 | c28026_g1_i1_len_1419_path_275_0_201_222_2_02_437_52_438_584_853_585_587_140_588_14_18_2               | 394   | sortilin-related receptor-like       | 467 | 2.49E-17  | 59.10% | 0.118   | IPR002172 (PRINTS); IPR002172 (SMART); IPR002172 (G3DSA:4.10.400.GENE3D); IPR002172 (PFAM); IPR002172 (G3DSA:4.10.400.GENE3D); PTHR10529 (PANTHER); IPR023415 (PROSITE_PATTERNS); IPR023415 (PROSITE_PATTERNS); NON_CYTOPLASMIC_DOMAIN (PHOBIUS); TRANSMEMBRANE (PHOBIUS); TRANSMEMBRANE (PHOBIUS); CYTOPLASMIC_DOMAIN (PHOBIUS); TRANSMEMBRANE (PHOBIUS); NON_CYTOPLASMIC_DOMAIN (PHOBIUS); CYTOPLASMIC_DOMAIN (PHOBIUS); IPR002172 (PROSITE_PROFILES); IPR002172 (PROSITE_PROFILES); IPR002172 (SUPERFAMILY); IPR002172 (SUPERFAMILY); TMhelix (TMHMM); TMhelix (TMHMM); TMhelix (TMHMM); TMhelix (TMHMM)              |
| 1015 | c28042_g1_i1_len_1155_path_1458_0_70_1529_71_188_1647_189_241_1698_242_300_135_301_337_1793_338_510_3  | 84621 | chymotrypsinogen 2-like              | 385 | 5.59E-46  | 56.70% | 0.414 Y | IPR001314 (PRINTS); IPR001254 (SMART); G3DSA:2.40.10.10 (GENE3D); IPR001254 (PFAM); G3DSA:2.40.10.10 (GENE3D); G3DSA:2.40.10.10 (GENE3D); PTHR24256 (PANTHER); IPR018114 (PROSITE_PATTERNS); IPR018114 (PROSITE_PATTERNS); SIGNAL_PEPTIDE_C_REGION (PHOBIUS); NON_CYTOPLASMIC_DOMAIN (PHOBIUS); SIGNAL_PEPTIDE_H_REGION (PHOBIUS); SIGNAL_PEPTIDE (PHOBIUS); SIGNAL_PEPTIDE_N_REGION (PHOBIUS); IPR001254 (PROSITE_PROFILES); IPR009003 (SUPERFAMILY); TMhelix (TMHMM)                                                                                                                                                   |
| 1016 | c28049_g1_i1_len_1051_path_1685_0_580_2263_581_609_2292_610_731_2413_732_732_536_7_33_1050_1           | 235   | trypsin i-p1-like                    | 350 | 2.36E-31  | 56.20% | 0.102   | IPR001314 (PRINTS); IPR001254 (SMART); G3DSA:2.40.10.10 (GENE3D); IPR001254 (PFAM); G3DSA:2.40.10.10 (GENE3D); PTHR24256 (PANTHER); IPR018114 (PROSITE_PATTERNS); TRANSMEMBRANE (PHOBIUS); NON_CYTOPLASMIC_DOMAIN (PHOBIUS); CYTOPLASMIC_DOMAIN (PHOBIUS); IPR001254 (PROSITE_PROFILES); IPR009003 (SUPERFAMILY); TMhelix (TMHMM); TMhelix (TMHMM)                                                                                                                                                                                                                                                                       |
| 1017 | c28049_g1_i2_len_1280_path_1685_0_580_268_581_693_554_694_1279_1                                       | 165   | transmembrane protease serine 9-like | 421 | 2.24E-31  | 56.20% | 0.102   | IPR001314 (PRINTS); IPR001254 (SMART); G3DSA:2.40.10.10 (GENE3D); IPR001254 (PFAM); G3DSA:2.40.10.10 (GENE3D); PTHR24256 (PANTHER); IPR018114 (PROSITE_PATTERNS); IPR001254 (PROSITE_PROFILES); IPR009003 (SUPERFAMILY)                                                                                                                                                                                                                                                                                                                                                                                                  |
| 1018 | c28057_g2_i1_len_2240_path_2720_0_1272_399_2_1273_1466_23_1467_1622_4341_1623_1630_4349_1631_1702_50_0 | 164   | arylsulfatase a-like                 | 747 | 0         | 68.40% | 0.177   | PF14707 (PFAM); IPR000917 (PFAM); IPR017849 (G3DSA:3.40.720.GENE3D); G3DSA:3.30.1120.10 (GENE3D); PTHR10342:SF22 (PANTHER); PTHR10342 (PANTHER); IPR024607 (PROSITE_PATTERNS); IPR024607 (PROSITE_PATTERNS); NON_CYTOPLASMIC_DOMAIN (PHOBIUS); NON_CYTOPLASMIC_DOMAIN (PHOBIUS); TRANSMEMBRANE (PHOBIUS); TRANSMEMBRANE (PHOBIUS); TRANSMEMBRANE (PHOBIUS); CYTOPLASMIC_DOMAIN (PHOBIUS); CYTOPLASMIC_DOMAIN (PHOBIUS); TRANSMEMBRANE (PHOBIUS); NON_CYTOPLASMIC_DOMAIN (PHOBIUS); TRANSMEMBRANE (PHOBIUS); NON_CYTOPLASMIC_DOMAIN (PHOBIUS); IPR017850 (SUPERFAMILY); TMhelix (TMHMM); TMhelix (TMHMM); TMhelix (TMHMM) |
| 1019 | c28057_g2_i2_len_2149_path_2720_0_1272_399_2_1273_1466_23_1467_1622_6104_1623_1627_4349_1628_1699_44_0 | 194   | arylsulfatase a-like                 | 717 | 0         | 68.00% | 0.177   | PF14707 (PFAM); G3DSA:3.30.1120.10 (GENE3D); IPR000917 (PFAM); IPR017849 (G3DSA:3.40.720.GENE3D); PTHR10342:SF22 (PANTHER); PTHR10342 (PANTHER); IPR024607 (PROSITE_PATTERNS); IPR024607 (PROSITE_PATTERNS); NON_CYTOPLASMIC_DOMAIN (PHOBIUS); CYTOPLASMIC_DOMAIN (PHOBIUS); NON_CYTOPLASMIC_DOMAIN (PHOBIUS); TRANSMEMBRANE (PHOBIUS); CYTOPLASMIC_DOMAIN (PHOBIUS); TRANSMEMBRANE (PHOBIUS); TRANSMEMBRANE (PHOBIUS); IPR017850 (SUPERFAMILY); TMhelix (TMHMM); TMhelix (TMHMM); TMhelix (TMHMM)                                                                                                                       |

|      |                                                                                                       |       |                                                       |     |           |        |         |                                                                                                                                                                                                                                                                                                                                                                                                                                                                                                |
|------|-------------------------------------------------------------------------------------------------------|-------|-------------------------------------------------------|-----|-----------|--------|---------|------------------------------------------------------------------------------------------------------------------------------------------------------------------------------------------------------------------------------------------------------------------------------------------------------------------------------------------------------------------------------------------------------------------------------------------------------------------------------------------------|
| 1020 | c28057_g2_i3_len_1958_path_2720_0_1272_23_1273_1428_4341_1429_1436_4349_1437_1508_4421_1509_1923_48_0 | 129   | arylsulfatase a-like                                  | 653 | 5.04E-153 | 71.20% | 0.177   | IPR017849 (G3DSA:3.40.720.GENE3D); IPR000917 (PFAM); PTHR10342 (PANTHER); PTHR10342:SF22 (PANTHER); IPR024607 (PROSITE_PATTERNS); IPR024607 (PROSITE_PATTERNS); CYTOPLASMIC_DOMAIN (PHOBIUS); TRANSMEMBRANE (PHOBIUS); NON_CYTOPLASMIC_DOMAIN (PHOBIUS); NON_CYTOPLASMIC_DOMAIN (PHOBIUS); TRANSMEMBRANE (PHOBIUS); IPR017850 (SUPERFAMILY); TMhelix (TMHMM); TMhelix (TMHMM)                                                                                                                  |
| 1021 | c28064_g1_i1_len_2391_path_105_0_2390_0                                                               | 228   | esterase fe4                                          | 797 | 2.85E-144 | 58.20% | 0.389 Y | IPR002018 (PFAM); IPR029058 (G3DSA:3.40.50.GENE3D); PTHR11559 (PANTHER); IPR019826 (PROSITE_PATTERNS); IPR019819 (PROSITE_PATTERNS); TRANSMEMBRANE (PHOBIUS); TRANSMEMBRANE (PHOBIUS); NON_CYTOPLASMIC_DOMAIN (PHOBIUS); CYTOPLASMIC_DOMAIN (PHOBIUS); CYTOPLASMIC_DOMAIN (PHOBIUS); TRANSMEMBRANE (PHOBIUS); NON_CYTOPLASMIC_DOMAIN (PHOBIUS); NON_CYTOPLASMIC_DOMAIN (PHOBIUS); IPR029058 (SUPERFAMILY); TMhelix (TMHMM); TMhelix (TMHMM); TMhelix (TMHMM); TMhelix (TMHMM); TMhelix (TMHMM) |
| 1022 | c28068_g1_i1_len_2660_path_127_0_381_509_3_82_1381_1509_1382_1382_1510_1383_2462_9_0_2463_2659_1      | 959   | n-acetylated-alpha-linked acidic dipeptidase          | 881 | 0         | 59.30% | 0.235   | IPR003137 (PFAM); IPR007365 (PFAM); IPR007365 (G3DSA:1.20.930.GENE3D); G3DSA:3.40.630.10 (GENE3D); G3DSA:3.50.30.30 (GENE3D); IPR007484 (PFAM); PTHR10404 (PANTHER); CYTOPLASMIC_DOMAIN (PHOBIUS); NON_CYTOPLASMIC_DOMAIN (PHOBIUS); TRANSMEMBRANE (PHOBIUS); CYTOPLASMIC_DOMAIN (PHOBIUS); NON_CYTOPLASMIC_DOMAIN (PHOBIUS); TRANSMEMBRANE (PHOBIUS); TRANSMEMBRANE (PHOBIUS); SSF53187 (SUPERFAMILY); SSF52025 (SUPERFAMILY); IPR007365 (SUPERFAMILY); TMhelix (TMHMM)                       |
| 1023 | c28078_g1_i1_len_2080_path_4427_0_137_2511_138_163_2537_164_894_6792_895_897_3268_898_1734_4105_2     | 119   | apolipoprotein d-like                                 | 688 | 1.04E-57  | 62.70% | 0.766 Y | IPR003057 (PRINTS); IPR012674 (G3DSA:2.40.128.GENE3D); IPR000566 (PFAM); PTHR10612:SF7 (PANTHER); PTHR10612 (PANTHER); IPR022272 (PROSITE_PATTERNS); SIGNAL_PEPTIDE_H_REGION (PHOBIUS); CYTOPLASMIC_DOMAIN (PHOBIUS); TRANSMEMBRANE (PHOBIUS); SIGNAL_PEPTIDE (PHOBIUS); SIGNAL_PEPTIDE_C_REGION (PHOBIUS); SIGNAL_PEPTIDE_N_REGION (PHOBIUS); NON_CYTOPLASMIC_DOMAIN (PHOBIUS); SignalP-TM (SIGNALP_GRAM_POSITIVE); SignalP-noTM (SIGNALP_EUK); IPR011038 (SUPERFAMILY); TMhelix (TMHMM)      |
| 1024 | c28078_g2_i1_len_1161_path_2291_0_219_2511_220_245_4726_246_1160_0                                    | 108   | apolipoprotein d-like                                 | 387 | 1.11E-41  | 60.50% | 0.205   | IPR003057 (PRINTS); IPR012674 (G3DSA:2.40.128.GENE3D); IPR000566 (PFAM); PTHR10612:SF7 (PANTHER); PTHR10612 (PANTHER); CYTOPLASMIC_DOMAIN (PHOBIUS); NON_CYTOPLASMIC_DOMAIN (PHOBIUS); TRANSMEMBRANE (PHOBIUS); IPR011038 (SUPERFAMILY); TMhelix (TMHMM)                                                                                                                                                                                                                                       |
| 1025 | c28096_g1_i1_len_2264_path_2343_0_542_2886_543_1489_3833_1490_1703_4045_1704_1823_78_1824_2263_0      | 76    | cytochrome p450 6k1-like                              | 755 | 3.68E-126 | 59.00% | 0.131   | IPR002401 (PRINTS); IPR001128 (PRINTS); IPR001128 (PFAM); IPR001128 (G3DSA:1.10.630.GENE3D); PTHR24292 (PANTHER); PTHR24292:SF24 (PANTHER); IPR017972 (PROSITE_PATTERNS); NON_CYTOPLASMIC_DOMAIN (PHOBIUS); CYTOPLASMIC_DOMAIN (PHOBIUS); TRANSMEMBRANE (PHOBIUS); TRANSMEMBRANE (PHOBIUS); TRANSMEMBRANE (PHOBIUS); CYTOPLASMIC_DOMAIN (PHOBIUS); IPR001128 (SUPERFAMILY); TMhelix (TMHMM); TMhelix (TMHMM); TMhelix (TMHMM)                                                                  |
| 1026 | c28106_g1_i1_len_1066_path_1_0_1038_3131_1_039_1039_1041_1040_1065_2                                  | 10974 | low quality protein: galectin-4                       | 355 | 5.60E-52  | 50.40% | 0.157   | IPR001079 (SMART); IPR001079 (SMART); IPR013320 (G3DSA:2.60.120.GENE3D); IPR001079 (PFAM); IPR013320 (G3DSA:2.60.120.GENE3D); PTHR11346 (PANTHER); IPR001079 (PROSITE_PROFILES); IPR001079 (PROSITE_PROFILES); IPR013320 (SUPERFAMILY); IPR013320 (SUPERFAMILY)                                                                                                                                                                                                                                |
| 1027 | c28113_g1_i1_len_2354_path_1_0_370_4988_37_1_2353_4                                                   | 305   | trichohyalin isoform x4                               | 772 | 3.15E-150 | 66.50% | 0.1     | Coil (COILS); IPR027881 (PFAM); PTHR15742 (PANTHER); PTHR15742:SF0 (PANTHER)                                                                                                                                                                                                                                           |
| 1028 | c28129_g3_i1_len_1944_path_9887_0_1098_795_0_1099_1136_11022_1137_1139_1953_1140_19_43_2              | 236   | cation channel sperm-associated protein subunit gamma | 642 | 2.68E-08  | 52.50% | 0.111   | Coil (COILS); TRANSMEMBRANE (PHOBIUS); NON_CYTOPLASMIC_DOMAIN (PHOBIUS); CYTOPLASMIC_DOMAIN (PHOBIUS)                                                                                                                                                                                                                                                                                                                                                                                          |

|      |                                                                                                               |      |                                       |     |           |        |       |                                                                                                                                                                                                                                                                                                                                                                                                                                                                                                                                                                                                                                    |
|------|---------------------------------------------------------------------------------------------------------------|------|---------------------------------------|-----|-----------|--------|-------|------------------------------------------------------------------------------------------------------------------------------------------------------------------------------------------------------------------------------------------------------------------------------------------------------------------------------------------------------------------------------------------------------------------------------------------------------------------------------------------------------------------------------------------------------------------------------------------------------------------------------------|
| 1029 | c28134_g1_i1_len_2823_path_263_0_329_590_3<br>30_340_36_341_819_1077_820_1128_115_1129<br>_1357_1613_1358_1_5 | 3405 | projectin short variant               | 915 | 0         | 79.80% | 0.259 | IPR003599 (SMART); IPR003598 (SMART); IPR013783 (G3DSA:2.60.40.GENE3D); IPR013783 (G3DSA:2.60.40.GENE3D); IPR013783 (G3DSA:2.60.40.GENE3D); IPR013783 (G3DSA:2.60.40.GENE3D); IPR013098 (PFAM); PTHR19897 (PANTHER); PTHR19897:SF155 (PANTHER); IPR007110 (PROSITE_PROFILES); IPR007110 (PROSITE_PROFILES); IPR007110 (PROSITE_PROFILES); IPR007110 (PROSITE_PROFILES); IPR007110 (PROSITE_PROFILES); IPR007110 (PROSITE_PROFILES); SSF48726 (SUPERFAMILY); SSF48726 (SUPERFAMILY) |
| 1030 | c28134_g1_i2_len_2805_path_263_0_329_590_3<br>30_340_36_341_819_1077_820_1128_115_1129<br>_1357_1613_1358_1_5 | 4099 | projectin short variant               | 909 | 0         | 80.80% | 0.259 | IPR003599 (SMART); IPR003598 (SMART); IPR013098 (PFAM); IPR013783 (G3DSA:2.60.40.GENE3D); IPR013783 (G3DSA:2.60.40.GENE3D); IPR013783 (G3DSA:2.60.40.GENE3D); IPR013783 (G3DSA:2.60.40.GENE3D); PTHR19897 (PANTHER); PTHR19897:SF155 (PANTHER); IPR007110 (PROSITE_PROFILES); IPR007110 (PROSITE_PROFILES); IPR007110 (PROSITE_PROFILES); IPR007110 (PROSITE_PROFILES); IPR007110 (PROSITE_PROFILES); IPR007110 (PROSITE_PROFILES); SSF48726 (SUPERFAMILY); SSF48726 (SUPERFAMILY); SSF48726 (SUPERFAMILY); SSF48726 (SUPERFAMILY); SSF48726 (SUPERFAMILY); SSF48726 (SUPERFAMILY); SSF48726 (SUPERFAMILY)                         |
| 1031 | c28134_g1_i3_len_2163_path_263_0_329_590_3<br>30_340_36_341_819_1077_820_1128_115_1129<br>_1357_184_1358_16_5 | 3658 | myosin light chain smooth muscle-like | 695 | 0         | 75.50% | 0.259 | IPR003599 (SMART); IPR003598 (SMART); IPR013783 (G3DSA:2.60.40.GENE3D); IPR013098 (PFAM); IPR013783 (G3DSA:2.60.40.GENE3D); IPR013783 (G3DSA:2.60.40.GENE3D); IPR013783 (G3DSA:2.60.40.GENE3D); PTHR19897 (PANTHER); PTHR19897:SF155 (PANTHER); IPR007110 (PROSITE_PROFILES); IPR007110 (PROSITE_PROFILES); IPR007110 (PROSITE_PROFILES); IPR007110 (PROSITE_PROFILES); IPR007110 (PROSITE_PROFILES); SSF48726 (SUPERFAMILY); SSF48726 (SUPERFAMILY); SSF48726 (SUPERFAMILY); SSF48726 (SUPERFAMILY)                                                                                                                               |
| 1032 | c28134_g1_i4_len_2496_path_263_0_329_590_3<br>30_340_36_341_819_115_820_1048_1613_1049<br>_1689_2254_1690_1_5 | 2739 | projectin short variant               | 806 | 0         | 74.50% | 0.259 | IPR003598 (SMART); IPR003599 (SMART); IPR013783 (G3DSA:2.60.40.GENE3D); IPR013098 (PFAM); IPR013783 (G3DSA:2.60.40.GENE3D); IPR013783 (G3DSA:2.60.40.GENE3D); IPR013783 (G3DSA:2.60.40.GENE3D); PTHR19897 (PANTHER); PTHR19897:SF155 (PANTHER); IPR007110 (PROSITE_PROFILES); IPR007110 (PROSITE_PROFILES); IPR007110 (PROSITE_PROFILES); IPR007110 (PROSITE_PROFILES); IPR007110 (PROSITE_PROFILES); SSF48726 (SUPERFAMILY); SSF48726 (SUPERFAMILY); SSF48726 (SUPERFAMILY); SSF48726 (SUPERFAMILY); SSF48726 (SUPERFAMILY); SSF48726 (SUPERFAMILY); SSF48726 (SUPERFAMILY)                                                       |
| 1033 | c28134_g1_i5_len_1854_path_263_0_329_25_33<br>0_340_36_341_819_115_820_1048_184_1049_1<br>354_2560_1355_137_5 | 1880 | isoform c                             | 592 | 8.19E-174 | 68.30% | 0.259 | IPR003598 (SMART); IPR003599 (SMART); IPR013098 (PFAM); IPR013783 (G3DSA:2.60.40.GENE3D); IPR013783 (G3DSA:2.60.40.GENE3D); IPR013783 (G3DSA:2.60.40.GENE3D); IPR013783 (G3DSA:2.60.40.GENE3D); PTHR19897 (PANTHER); PTHR19897:SF155 (PANTHER); IPR007110 (PROSITE_PROFILES); IPR007110 (PROSITE_PROFILES); IPR007110 (PROSITE_PROFILES); SSF48726 (SUPERFAMILY); SSF48726 (SUPERFAMILY); SSF48726 (SUPERFAMILY); SSF48726 (SUPERFAMILY)                                                                                                                                                                                           |
| 1034 | c28134_g1_i6_len_2823_path_263_0_329_590_3<br>30_340_36_341_819_1077_820_1128_115_1129<br>_1357_1613_1358_1_5 | 3971 | projectin short variant               | 915 | 0         | 80.00% | 0.259 | IPR003598 (SMART); IPR003599 (SMART); IPR013783 (G3DSA:2.60.40.GENE3D); IPR013783 (G3DSA:2.60.40.GENE3D); IPR013783 (G3DSA:2.60.40.GENE3D); IPR013783 (G3DSA:2.60.40.GENE3D); IPR013098 (PFAM); PTHR19897 (PANTHER); PTHR19897:SF155 (PANTHER); IPR007110 (PROSITE_PROFILES); IPR007110 (PROSITE_PROFILES); IPR007110 (PROSITE_PROFILES); IPR007110 (PROSITE_PROFILES); IPR007110 (PROSITE_PROFILES); SSF48726 (SUPERFAMILY); SSF48726 (SUPERFAMILY); SSF48726 (SUPERFAMILY); SSF48726 (SUPERFAMILY); SSF48726 (SUPERFAMILY)                                                                                                       |

|      |                                                                                                               |      |                                                            |      |           |        |         |                                                                                                                                                                                                                                                                                                                                                                                                                                                                                                                                                                                                                                                                                                              |
|------|---------------------------------------------------------------------------------------------------------------|------|------------------------------------------------------------|------|-----------|--------|---------|--------------------------------------------------------------------------------------------------------------------------------------------------------------------------------------------------------------------------------------------------------------------------------------------------------------------------------------------------------------------------------------------------------------------------------------------------------------------------------------------------------------------------------------------------------------------------------------------------------------------------------------------------------------------------------------------------------------|
| 1035 | c28140_g1_i3_len_702_path_1075_0_25_1101_2<br>6_65_1141_66_220_2272_221_239_1028_240_4<br>20_982_421_681_27_5 | 17   | translocase of inner mitochondrial membrane 8<br>homolog b | 234  | 5.90E-33  | 78.30% | 0.113   | IPR004217 (G3DSA:1.10.287.GENE3D); IPR004217 (PFAM); PTHR21535:SF25 (PANTHER); PTHR21535 (PANTHER); IPR004217 (SUPERFAMILY)                                                                                                                                                                                                                                                                                                                                                                                                                                                                                                                                                                                  |
| 1036 | c28158_g3_i1_len_1608_path_1_0_249_251_250<br>_877_1344_878_1033_1500_1034_1428_4436_1<br>429_1447_1914_144_3 | 80   | calnexin-like isoform x2                                   | 536  | 8.57E-134 | 76.30% | 0.111   | IPR001580 (PRINTS); IPR013320 (G3DSA:2.60.120.GENE3D); IPR001580 (PFAM); PTHR11073:SF1 (PANTHER); IPR001580 (PANTHER); IPR018124 (PROSITE_PATTERNS); IPR018124 (PROSITE_PATTERNS); IPR018124 (PROSITE_PATTERNS); IPR009033 (SUPERFAMILY); IPR013320 (SUPERFAMILY)                                                                                                                                                                                                                                                                                                                                                                                                                                            |
| 1037 | c28158_g3_i3_len_1572_path_503_0_213_251_2<br>14_841_1344_842_997_1500_998_1392_4436_1<br>393_1411_1914_141_3 | 101  | calnexin-like isoform x2                                   | 524  | 1.76E-88  | 77.80% | 0.111   | IPR001580 (PRINTS); IPR001580 (PFAM); IPR013320 (G3DSA:2.60.120.GENE3D); PTHR11073:SF1 (PANTHER); IPR001580 (PANTHER); IPR018124 (PROSITE_PATTERNS); TRANSMEMBRANE (PHOBIUS); TRANSMEMBRANE (PHOBIUS); NON_CYTOPLASMIC_DOMAIN (PHOBIUS); TRANSMEMBRANE (PHOBIUS); CYTOPLASMIC_DOMAIN (PHOBIUS); NON_CYTOPLASMIC_DOMAIN (PHOBIUS); CYTOPLASMIC_DOMAIN (PHOBIUS); IPR013320 (SUPERFAMILY)                                                                                                                                                                                                                                                                                                                      |
| 1038 | c28177_g1_i1_len_1907_path_105_0_1906_2                                                                       | 1011 | abhydrolase domain-containing protein 15-like              | 631  | 1.55E-79  | 57.60% | 0.254   | IPR000073 (PFAM); IPR029058 (G3DSA:3.40.50.GENE3D); PTHR10794 (PANTHER); PTHR10794:SF28 (PANTHER); CYTOPLASMIC_DOMAIN (PHOBIUS); TRANSMEMBRANE (PHOBIUS); NON_CYTOPLASMIC_DOMAIN (PHOBIUS); CYTOPLASMIC_DOMAIN (PHOBIUS); TRANSMEMBRANE (PHOBIUS); IPR029058 (SUPERFAMILY); TMhelix (TMHMM); TMhelix (TMHMM)                                                                                                                                                                                                                                                                                                                                                                                                 |
| 1039 | c28200_g1_i1_len_1851_path_1341_0_1140_248<br>2_1141_1181_695_1182_1273_4942_1274_1274<br>_4943_1275_1275_7_2 | 607  | superoxide dismutase                                       | 611  | 2.29E-45  | 67.20% | 0.134   | IPR001424 (PRINTS); IPR001424 (PFAM); IPR001424 (G3DSA:2.60.40.GENE3D); PTHR10003 (PANTHER); IPR018152 (PROSITE_PATTERNS); IPR018152 (PROSITE_PATTERNS); CYTOPLASMIC_DOMAIN (PHOBIUS); TRANSMEMBRANE (PHOBIUS); NON_CYTOPLASMIC_DOMAIN (PHOBIUS); NON_CYTOPLASMIC_DOMAIN (PHOBIUS); TRANSMEMBRANE (PHOBIUS); TRANSMEMBRANE (PHOBIUS); NON_CYTOPLASMIC_DOMAIN (PHOBIUS); TRANSMEMBRANE (PHOBIUS); CYTOPLASMIC_DOMAIN (PHOBIUS); IPR001424 (SUPERFAMILY)                                                                                                                                                                                                                                                       |
| 1040 | c28206_g1_i1_len_4265_path_8526_0_159_8686<br>_160_194_6012_195_232_6050_233_2031_347<br>6_2032_3788_523_5    | 103  | protein rhsa                                               | 1421 | 0         | 98.50% | 0.153   | IPR001826 (PRINTS); IPR006530 (PFAM); IPR001826 (PFAM); IPR022385 (TIGRFAM); IPR006530 (TIGRFAM); PTHR32305:SF6 (PANTHER); PTHR32305 (PANTHER); CYTOPLASMIC_DOMAIN (PHOBIUS); TRANSMEMBRANE (PHOBIUS); NON_CYTOPLASMIC_DOMAIN (PHOBIUS); TRANSMEMBRANE (PHOBIUS); TMhelix (TMHMM)                                                                                                                                                                                                                                                                                                                                                                                                                            |
| 1041 | c28239_g1_i1_len_1866_path_2030_0_1180_320<br>9_1181_1203_3232_1204_1204_3233_1205_160<br>0_3624_1601_1601_1  | 150  | methylmalonate-semialdehyde dehydrogenase                  | 616  | 0         | 88.40% | 0.103   | IPR016163 (G3DSA:3.40.309.GENE3D); IPR010061 (TIGRFAM); IPR016162 (G3DSA:3.40.605.GENE3D); IPR015590 (PFAM); IPR010061 (PTHR11699:PANTHER); PTHR11699 (PANTHER); IPR016160 (PROSITE_PATTERNS); NON_CYTOPLASMIC_DOMAIN (PHOBIUS); CYTOPLASMIC_DOMAIN (PHOBIUS); TRANSMEMBRANE (PHOBIUS); TRANSMEMBRANE (PHOBIUS); CYTOPLASMIC_DOMAIN (PHOBIUS); IPR016161 (SUPERFAMILY); TMhelix (TMHMM)                                                                                                                                                                                                                                                                                                                      |
| 1042 | c28252_g1_i2_len_1588_path_53_0_884_938_88<br>5_1360_1414_1361_1372_2910_1373_1437_297<br>5_1438_1468_3844_3  | 348  | polyubiquitin-c-like isoform 2                             | 530  | 8.63E-141 | 99.00% | 0.111   | IPR019956 (PRINTS); IPR000626 (SMART); G3DSA:3.10.20.90 (GENE3D); IPR000626 (PFAM); PTHR10666 (PANTHER); IPR019954 (PROSITE_PATTERNS); IPR019954 (PROSITE_PATTERNS); IPR019954 (PROSITE_PATTERNS); NON_CYTOPLASMIC_DOMAIN (PHOBIUS); CYTOPLASMIC_DOMAIN (PHOBIUS); CYTOPLASMIC_DOMAIN (PHOBIUS); NON_CYTOPLASMIC_DOMAIN (PHOBIUS); TRANSMEMBRANE (PHOBIUS); TRANSMEMBRANE (PHOBIUS); CYTOPLASMIC_DOMAIN (PHOBIUS); TRANSMEMBRANE (PHOBIUS); NON_CYTOPLASMIC_DOMAIN (PHOBIUS); TRANSMEMBRANE (PHOBIUS); IPR000626 (PROSITE_PROFILES); IPR000626 (PROSITE_PROFILES); IPR000626 (PROSITE_PROFILES); IPR029071 (SUPERFAMILY); IPR029071 (SUPERFAMILY); IPR029071 (SUPERFAMILY); TMhelix (TMHMM); TMhelix (TMHMM) |
| 1043 | c28261_g1_i1_len_1136_path_2644_0_435_3078<br>_436_690_3333_691_952_3595_953_1028_5166<br>_1029_1032_25_103_1 | 105  | iduronate 2- partial                                       | 379  | 1.96E-147 | 77.20% | 0.462 Y | IPR017849 (G3DSA:3.40.720.GENE3D); IPR000917 (PFAM); PTHR10342 (PANTHER); PTHR10342:SF185 (PANTHER); IPR024607 (PROSITE_PATTERNS); SignalP-noTM (SIGNALP_EUK); IPR017850 (SUPERFAMILY)                                                                                                                                                                                                                                                                                                                                                                                                                                                                                                                       |
| 1044 | c28261_g1_i2_len_2028_path_2644_0_435_3333<br>_436_697_5166_698_701_3674_702_2027_1                           | 288  | iduronate 2-sulfatase                                      | 669  | 1.07E-73  | 62.80% | 0.462 Y | IPR000917 (PFAM); IPR017849 (G3DSA:3.40.720.GENE3D); PTHR10342:SF185 (PANTHER); PTHR10342 (PANTHER); IPR024607 (PROSITE_PATTERNS); SignalP-noTM (SIGNALP_EUK); IPR017850 (SUPERFAMILY)                                                                                                                                                                                                                                                                                                                                                                                                                                                                                                                       |



|      |                                                                                                         |      |                                                             |      |           |        |         |                                                                                                                                                                                                                                                                                                                                                                                                                                                                                                                                                                                                         |
|------|---------------------------------------------------------------------------------------------------------|------|-------------------------------------------------------------|------|-----------|--------|---------|---------------------------------------------------------------------------------------------------------------------------------------------------------------------------------------------------------------------------------------------------------------------------------------------------------------------------------------------------------------------------------------------------------------------------------------------------------------------------------------------------------------------------------------------------------------------------------------------------------|
| 1045 | c28261_g1_i3_len_2359_path_2644_0_435_3078_436_690_3333_691_952_3595_953_1028_5166_1029_1032_3674_1_1   | 467  | iduronate 2-sulfatase                                       | 779  | 0         | 67.60% | 0.462 Y | IPR000917 (PFAM); IPR017849 (G3DSA:3.40.720.GENE3D); G3DSA:3.30.1120.10 (GENE3D); PTHR10342:SF185 (PANTHER); PTHR10342 (PANTHER); IPR024607 (PROSITE_PATTERNS); NON_CYTOPLASMIC_DOMAIN (PHOBIUS); TRANSMEMBRANE (PHOBIUS); TRANSMEMBRANE (PHOBIUS); CYTOPLASMIC_DOMAIN (PHOBIUS); NON_CYTOPLASMIC_DOMAIN (PHOBIUS); SignalP-noTM (SIGNALP_EUK); IPR017850 (SUPERFAMILY)                                                                                                                                                                                                                                 |
| 1046 | c28268_g1_i1_len_2001_path_1_0_845_847_846_2000_3                                                       | 8093 | gamma-glutamyltranspeptidase 1-like isoform x3              | 661  | 0         | 66.10% | 0.33    | IPR000101 (PRINTS); IPR000101 (PFAM); IPR000101 (TIGRFAM); IPR000101 (PANTHER); PTHR11686:SF15 (PANTHER); IPR029055 (SUPERFAMILY)                                                                                                                                                                                                                                                                                                                                                                                                                                                                       |
| 1047 | c28270_g1_i2_len_2739_path_53_0_543_597_54_4_545_599_546_805_859_806_807_861_808_17_80_1834_1781_2738_5 | 718  | tyrosine-protein phosphatase non-receptor type 9 isoform x1 | 906  | 0         | 67.60% | 0.135   | IPR000242 (PRINTS); IPR000242 (SMART); IPR003595 (SMART); IPR000242 (PFAM); IPR001251 (PFAM); IPR029021 (G3DSA:3.90.190.GENE3D); IPR001251 (G3DSA:3.40.525.GENE3D); PTHR19134:SF232 (PANTHER); PTHR19134 (PANTHER); IPR016130 (PROSITE_PATTERNS); TRANSMEMBRANE (PHOBIUS); CYTOPLASMIC_DOMAIN (PHOBIUS); TRANSMEMBRANE (PHOBIUS); NON_CYTOPLASMIC_DOMAIN (PHOBIUS); TRANSMEMBRANE (PHOBIUS); NON_CYTOPLASMIC_DOMAIN (PHOBIUS); CYTOPLASMIC_DOMAIN (PHOBIUS); IPR001251 (PROSITE_PROFILES); IPR000242 (PROSITE_PROFILES); IPR000387 (PROSITE_PROFILES); IPR029021 (SUPERFAMILY); IPR001251 (SUPERFAMILY) |
| 1048 | c28274_g1_i1_len_2065_path_2251_0_228_87_2_29_2064_3                                                    | 8301 | peptidyl-prolyl cis-trans isomerase 5                       | 682  | 1.24E-111 | 86.30% | 0.406 Y | IPR002130 (PRINTS); IPR029000 (G3DSA:2.40.100.GENE3D); IPR002130 (PFAM); PTHR11071:SF63 (PANTHER); IPR024936 (PANTHER); IPR020892 (PROSITE_PATTERNS); CYTOPLASMIC_DOMAIN (PHOBIUS); NON_CYTOPLASMIC_DOMAIN (PHOBIUS); TRANSMEMBRANE (PHOBIUS); TRANSMEMBRANE (PHOBIUS); NON_CYTOPLASMIC_DOMAIN (PHOBIUS); IPR002130 (PROSITE_PROFILES); IPR029000 (SUPERFAMILY)                                                                                                                                                                                                                                         |
| 1049 | c28279_g2_i1_len_933_path_3533_0_149_1022_150_932_4                                                     | 33   | 15-hydroxyprostaglandin dehydrogenase                       | 311  | 1.60E-54  | 64.60% | 0.119   | IPR002347 (PRINTS); IPR002198 (PRINTS); IPR002198 (PFAM); IPR016040 (G3DSA:3.40.50.GENE3D); PTHR24310 (PANTHER); SSF51735 (SUPERFAMILY)                                                                                                                                                                                                                                                                                                                                                                                                                                                                 |
| 1050 | c28279_g2_i2_len_1392_path_3949_0_100_4048_101_125_4073_126_179_4126_180_195_3493_196_379_793_380_3_4   | 132  | 15-hydroxyprostaglandin dehydrogenase                       | 458  | 7.43E-64  | 62.90% | 0.119   | IPR002347 (PRINTS); IPR002198 (PRINTS); IPR016040 (G3DSA:3.40.50.GENE3D); IPR002198 (PFAM); PTHR24310 (PANTHER); CYTOPLASMIC_DOMAIN (PHOBIUS); TRANSMEMBRANE (PHOBIUS); NON_CYTOPLASMIC_DOMAIN (PHOBIUS); SSF51735 (SUPERFAMILY)                                                                                                                                                                                                                                                                                                                                                                        |
| 1051 | c28287_g2_i1_len_3550_path_1211_0_63_1210_64_817_1074_818_1415_2622_1416_1434_2641_1435_3549_3          | 2595 | long form-like                                              | 1184 | 0         | 86.30% | 0.123   | Coil (COILS); IPR002928 (PFAM); PTHR13140 (PANTHER); PTHR13140:SF164 (PANTHER); SSF90257 (SUPERFAMILY); SSF90257 (SUPERFAMILY); SSF90257 (SUPERFAMILY)                                                                                                                                                                                                                                                                                        |
| 1052 | c28299_g1_i1_len_866_path_45_0_306_352_307_746_3185_747_747_2874_748_865_1                              | 196  | hypothetical protein BRAFLDRAFT_71031                       | 289  | 2.32E-15  | 50.25% | 0.106   | NON_CYTOPLASMIC_DOMAIN (PHOBIUS); TRANSMEMBRANE (PHOBIUS); CYTOPLASMIC_DOMAIN (PHOBIUS); TMhelix (TMHMM)                                                                                                                                                                                                                                                                                                                                                                                                                                                                                                |
| 1053 | c28299_g1_i3_len_1368_path_45_0_306_352_30_7_746_3185_747_747_792_748_1148_1193_114_9_1149_1194_1150_1  | 429  | c3orf33 protein                                             | 448  | 1.95E-30  | 45.30% | 0.106   | IPR016071 (G3DSA:2.40.50.GENE3D); IPR016071 (SUPERFAMILY); TMhelix (TMHMM)                                                                                                                                                                                                                                                                                                                                                                                                                                                                                                                              |
| 1054 | c28306_g1_i1_len_1241_path_1368_0_501_2724_502_1240_2                                                   | 258  | prohormone-1-like                                           | 407  | 1.22E-29  | 77.80% | 0.107   | TRANSMEMBRANE (PHOBIUS); CYTOPLASMIC_DOMAIN (PHOBIUS); NON_CYTOPLASMIC_DOMAIN (PHOBIUS); TMhelix (TMHMM)                                                                                                                                                                                                                                                                                                                                                                                                                                                                                                |
| 1055 | c28311_g1_i1_len_720_path_2547_0_15_2563_1_6_168_2716_169_565_3113_566_697_5448_698_719_2               | 153  | ras-related protein rab-1a                                  | 240  | 1.15E-126 | 95.20% | 0.155   | IPR001806 (PRINTS); IPR002041 (SMART); IPR003579 (SMART); IPR024156 (SMART); IPR003578 (SMART); IPR020849 (SMART); IPR027417 (G3DSA:3.40.50.GENE3D); IPR005225 (TIGRFAM); IPR001806 (PFAM); PTHR24073:SF455 (PANTHER); PTHR24073 (PANTHER); PS51419 (PROSITE_PROFILES); IPR027417 (SUPERFAMILY)                                                                                                                                                                                                                                                                                                         |
| 1056 | c28311_g1_i2_len_1796_path_2547_0_15_2563_16_168_2716_169_565_3113_566_697_3245_69_8_781_3329_782_10_2  | 515  | ras-related protein rab-1a                                  | 598  | 2.83E-130 | 93.90% | 0.155   | IPR001806 (PRINTS); IPR003579 (SMART); IPR003578 (SMART); IPR002041 (SMART); IPR020849 (SMART); IPR024156 (SMART); IPR001806 (PFAM); IPR027417 (G3DSA:3.40.50.GENE3D); IPR005225 (TIGRFAM); PTHR24073 (PANTHER); PTHR24073:SF455 (PANTHER); TRANSMEMBRANE (PHOBIUS); NON_CYTOPLASMIC_DOMAIN (PHOBIUS); NON_CYTOPLASMIC_DOMAIN (PHOBIUS); TRANSMEMBRANE (PHOBIUS); CYTOPLASMIC_DOMAIN (PHOBIUS); PS51419 (PROSITE_PROFILES); IPR027417 (SUPERFAMILY); TMhelix (TMHMM); TMhelix (TMHMM)                                                                                                                   |

|      |                                                                                                         |      |                                                  |     |           |        |       |                                                                                                                                                                                                                                                                                                                                                                                                                                                                                                                                                                                                                                                                                                                                                                                     |
|------|---------------------------------------------------------------------------------------------------------|------|--------------------------------------------------|-----|-----------|--------|-------|-------------------------------------------------------------------------------------------------------------------------------------------------------------------------------------------------------------------------------------------------------------------------------------------------------------------------------------------------------------------------------------------------------------------------------------------------------------------------------------------------------------------------------------------------------------------------------------------------------------------------------------------------------------------------------------------------------------------------------------------------------------------------------------|
| 1057 | c28311_g1_i3_len_1411_path_2716_0_396_3329_397_645_5_646_1410_1                                         | 193  | ras-related protein rab- partial                 | 470 | 5.03E-85  | 98.00% | 0.181 | IPR001806 (PRINTS); IPR003578 (SMART); IPR024156 (SMART); IPR002041 (SMART); IPR003579 (SMART); IPR020849 (SMART); IPR001806 (PFAM); IPR027417 (G3DSA:3.40.50.GENE3D); IPR005225 (TIGRFAM); PTHR24073:SF455 (PANTHER); PTHR24073 (PANTHER); TRANSMEMBRANE (PHOBIUS); CYTOPLASMIC_DOMAIN (PHOBIUS); NON_CYTOPLASMIC_DOMAIN (PHOBIUS); TRANSMEMBRANE (PHOBIUS); NON_CYTOPLASMIC_DOMAIN (PHOBIUS); PS51419 (PROSITE_PROFILES); IPR027417 (SUPERFAMILY); TMhelix (TMHMM); TMhelix (TMHMM)                                                                                                                                                                                                                                                                                               |
| 1058 | c28332_g1_i1_len_2295_path_307_0_2294_2                                                                 | 3750 | angiotensin-converting enzyme-like               | 759 | 0         | 71.20% | 0.159 | IPR001548 (PRINTS); IPR001548 (PFAM); IPR001548 (PANTHER); SSF55486 (SUPERFAMILY)                                                                                                                                                                                                                                                                                                                                                                                                                                                                                                                                                                                                                                                                                                   |
| 1059 | c28334_g6_i1_len_1981_path_6955_0_1980_0                                                                | 2832 | methyltransferase-like protein 23                | 661 | 4.11E-94  | 76.60% | 0.104 | IPR000582 (PRINTS); IPR002110 (SMART); IPR000504 (SMART); IPR029063 (G3DSA:3.40.50.GENE3D); IPR019410 (PFAM); IPR020683 (G3DSA:1.25.40.GENE3D); IPR000582 (PFAM); IPR020683 (PFAM); IPR000504 (PFAM); IPR014352 (G3DSA:1.20.80.GENE3D); IPR012677 (G3DSA:3.30.70.GENE3D); PTHR24119:SF0 (PANTHER); PTHR24119 (PANTHER); IPR000582 (PROSITE_PROFILES); IPR002110 (PROSITE_PROFILES); IPR002110 (PROSITE_PROFILES); IPR020683 (PROSITE_PROFILES); IPR000504 (PROSITE_PROFILES); IPR000582 (SUPERFAMILY); SSF54928 (SUPERFAMILY); IPR020683 (SUPERFAMILY); IPR029063 (SUPERFAMILY)                                                                                                                                                                                                     |
| 1060 | c28361_g1_i1_len_2064_path_121_0_2063_2                                                                 | 424  | carbonic anhydrase 1                             | 682 | 2.04E-103 | 69.30% | 0.107 | IPR001148 (SMART); IPR001148 (G3DSA:3.10.200.GENE3D); IPR001148 (PFAM); IPR023561 (PANTHER); IPR018338 (PROSITE_PATTERNS); CYTOPLASMIC_DOMAIN (PHOBIUS); TRANSMEMBRANE (PHOBIUS); NON_CYTOPLASMIC_DOMAIN (PHOBIUS); IPR001148 (PROSITE_PROFILES); IPR001148 (SUPERFAMILY)                                                                                                                                                                                                                                                                                                                                                                                                                                                                                                           |
| 1061 | c28363_g1_i1_len_2317_path_2295_0_1935_485_2_1936_1952_4248_1953_2316_2                                 | 160  | nicotinic acetylcholine receptor subunit alpha10 | 766 | 3.68E-105 | 59.10% | 0.301 | IPR006201 (PRINTS); IPR027361 (G3DSA:1.20.120.GENE3D); IPR006029 (PFAM); IPR006202 (G3DSA:2.70.170.GENE3D); IPR006202 (PFAM); PTHR18945:SF490 (PANTHER); IPR006201 (PANTHER); TRANSMEMBRANE (PHOBIUS); CYTOPLASMIC_DOMAIN (PHOBIUS); TRANSMEMBRANE (PHOBIUS); NON_CYTOPLASMIC_DOMAIN (PHOBIUS); TRANSMEMBRANE (PHOBIUS); CYTOPLASMIC_DOMAIN (PHOBIUS); TRANSMEMBRANE (PHOBIUS); TRANSMEMBRANE (PHOBIUS); CYTOPLASMIC_DOMAIN (PHOBIUS); TRANSMEMBRANE (PHOBIUS); NON_CYTOPLASMIC_DOMAIN (PHOBIUS); TRANSMEMBRANE (PHOBIUS); CYTOPLASMIC_DOMAIN (PHOBIUS); NON_CYTOPLASMIC_DOMAIN (PHOBIUS); NON_CYTOPLASMIC_DOMAIN (PHOBIUS); IPR006202 (SUPERFAMILY); IPR006029 (SUPERFAMILY); TMhelix (TMHMM); TMhelix (TMHMM); TMhelix (TMHMM); TMhelix (TMHMM); TMhelix (TMHMM); TMhelix (TMHMM) |
| 1062 | c28374_g5_i1_len_2075_path_7193_0_55_845_5_6_2074_4                                                     | 51   | PREDICTED: uncharacterized protein C15orf61-like | 692 | 4.20E-57  | 77.40% | 0.235 | IPR029245 (PFAM)                                                                                                                                                                                                                                                                                                                                                                                                                                                                                                                                                                                                                                                                                                                                                                    |
| 1063 | c28396_g1_i1_len_1132_path_1496_0_64_280_6_5_106_98_107_145_300_146_749_2239_750_7_63_137_764_861_0     | 141  | i-type lysozyme                                  | 378 | 1.50E-35  | 65.20% | 0.12  | IPR008597 (PFAM); IPR008597 (PANTHER); IPR018247 (PROSITE_PATTERNS); TRANSMEMBRANE (PHOBIUS); CYTOPLASMIC_DOMAIN (PHOBIUS); NON_CYTOPLASMIC_DOMAIN (PHOBIUS); TRANSMEMBRANE (PHOBIUS); CYTOPLASMIC_DOMAIN (PHOBIUS); TMhelix (TMHMM)                                                                                                                                                                                                                                                                                                                                                                                                                                                                                                                                                |
| 1064 | c28396_g1_i2_len_1159_path_1496_0_64_279_6_5_65_280_66_107_72_108_133_98_134_172_30_0_173_776_2239_0    | 138  | i-type lysozyme                                  | 387 | 1.80E-35  | 64.50% | 0.13  | IPR008597 (PFAM); IPR008597 (PANTHER); IPR018247 (PROSITE_PATTERNS); NON_CYTOPLASMIC_DOMAIN (PHOBIUS); CYTOPLASMIC_DOMAIN (PHOBIUS); TRANSMEMBRANE (PHOBIUS); TMhelix (TMHMM); TMhelix (TMHMM)                                                                                                                                                                                                                                                                                                                                                                                                                                                                                                                                                                                      |
| 1065 | c28450_g1_i1_len_1704_path_33_0_796_830_79_7_798_832_799_1071_1105_1072_1080_1114_1_081_1676_3773_167_1 | 354  | 46 kda fk506-binding nuclear protein             | 562 | 9.30E-47  | 73.30% | 0.248 | Coil (COILS); G3DSA:3.10.50.40 (GENE3D); IPR001179 (PFAM); IPR023566 (PANTHER); IPR001179 (PROSITE_PROFILES); SSF54534 (SUPERFAMILY); IPR024057 (SUPERFAMILY)                                                                                                                                                                                                                                                                                                                                                                                                                                                                                                                                                                                                                       |
| 1066 | c28483_g2_i1_len_2544_path_5816_0_387_1384_388_770_1057_771_1132_1273_1133_1477_72_85_1478_1751_1972_1  | 122  | plexin domain-containing protein partial         | 848 | 3.62E-136 | 59.00% | 0.335 | IPR016201 (SMART); G3DSA:3.30.1680.10 (GENE3D); PTHR13055 (PANTHER); PTHR13055:SF12 (PANTHER); CYTOPLASMIC_DOMAIN (PHOBIUS); TRANSMEMBRANE (PHOBIUS); NON_CYTOPLASMIC_DOMAIN (PHOBIUS); TRANSMEMBRANE (PHOBIUS); NON_CYTOPLASMIC_DOMAIN (PHOBIUS); TRANSMEMBRANE (PHOBIUS); CYTOPLASMIC_DOMAIN (PHOBIUS); TRANSMEMBRANE (PHOBIUS); TMhelix (TMHMM); TMhelix (TMHMM); TMhelix (TMHMM)                                                                                                                                                                                                                                                                                                                                                                                                |
| 1067 | c28483_g2_i2_len_435_path_1183_0_89_1273_9_0_434_2                                                      | 0    | plexin domain-containing protein partial         | 145 | 1.04E-31  | 62.30% | 0.107 | IPR016201 (SMART); G3DSA:3.30.1680.10 (GENE3D); PTHR13055:SF12 (PANTHER); PTHR13055 (PANTHER)                                                                                                                                                                                                                                                                                                                                                                                                                                                                                                                                                                                                                                                                                       |

[illegible]

|      |                                                                                                        |     |                                    |     |           |        |       |                                                                                                                                                                                                                                                                                                                                                                                                                                                                                                                                                                                                                                                                                                                                                                                                                                                                                                                                        |
|------|--------------------------------------------------------------------------------------------------------|-----|------------------------------------|-----|-----------|--------|-------|----------------------------------------------------------------------------------------------------------------------------------------------------------------------------------------------------------------------------------------------------------------------------------------------------------------------------------------------------------------------------------------------------------------------------------------------------------------------------------------------------------------------------------------------------------------------------------------------------------------------------------------------------------------------------------------------------------------------------------------------------------------------------------------------------------------------------------------------------------------------------------------------------------------------------------------|
| 1071 | c28484_g2_i4_len_2135_path_4543_0_90_4634_91_1170_6257_1171_1277_1951_1278_2134_2                      | 58  | zinc finger protein 2 homolog      | 711 | 0         | 70.80% | 0.108 | IPR015880 (SMART); IPR007087 (PFAM); IPR013087 (G3DSA:3.30.160.GENE3D); IPR013087 (G3DSA:3.30.160.GENE3D); IPR013087 (G3DSA:3.30.160.GENE3D); IPR013087 (G3DSA:3.30.160.GENE3D); PF13465 (PFAM); PTHR24409 (PANTHER); IPR007087 (PROSITE_PATTERNS); IPR007087 (PROSITE_PROFILES); SSF57667 (SUPERFAMILY); SSF57667 (SUPERFAMILY); SSF57667 (SUPERFAMILY); SSF57667 (SUPERFAMILY); SSF57667 (SUPERFAMILY) |
| 1072 | c28488_g2_i1_len_2440_path_1639_0_529_341_530_530_342_531_568_2204_569_688_290_689_2425_7814_2426_2_2  | 638 | angiotensin-converting enzyme-like | 813 | 0         | 78.50% | 0.113 | IPR001548 (PRINTS); IPR001548 (PFAM); IPR001548 (PANTHER); PTHR10514:SF17 (PANTHER); TRANSMEMBRANE (PHOBIUS); TRANSMEMBRANE (PHOBIUS); NON_CYTOPLASMIC_DOMAIN (PHOBIUS); NON_CYTOPLASMIC_DOMAIN (PHOBIUS); CYTOPLASMIC_DOMAIN (PHOBIUS); SSF55486 (SUPERFAMILY); TMhelix (TMHMM); TMhelix (TMHMM)                                                                                                                                                                                                                                                                                                                                                                                                                                                                                                                                                                                                                                      |
| 1073 | c28540_g2_i1_len_2301_path_8248_0_1258_950_6_1259_1260_4479_1261_1600_4893_1601_163_2_4924_1633_1650_1 | 201 | wd repeat-containing protein 61    | 767 | 5.56E-153 | 87.10% | 0.101 | IPR001680 (SMART); IPR015943 (G3DSA:2.130.10.GENE3D); IPR001680 (PFAM); PTHR22841 (PANTHER); CYTOPLASMIC_DOMAIN (PHOBIUS); CYTOPLASMIC_DOMAIN (PHOBIUS); TRANSMEMBRANE (PHOBIUS); NON_CYTOPLASMIC_DOMAIN (PHOBIUS); TRANSMEMBRANE (PHOBIUS); IPR001680 (PROSITE_PROFILES); IPR001680 (PROSITE_PROFILES); IPR001680 (PROSITE_PROFILES); IPR001680 (PROSITE_PROFILES); IPR001680 (PROSITE_PROFILES); IPR017986 (PROSITE_PROFILES); IPR017986 (SUPERFAMILY); TMhelix (TMHMM)                                                                                                                                                                                                                                                                                                                                                                                                                                                              |
| 1074 | c28542_g2_i1_len_2933_path_3010_0_2932_1                                                               | 524 | sel1l protein                      | 972 | 0         | 77.70% | 0.259 | Coil (COILS); IPR006597 (SMART); IPR011990 (G3DSA:1.25.40.GENE3D); IPR011990 (G3DSA:1.25.40.GENE3D); IPR006597 (PFAM); PTHR11102:SF55 (PANTHER); PTHR11102 (PANTHER); TRANSMEMBRANE (PHOBIUS); NON_CYTOPLASMIC_DOMAIN (PHOBIUS); SIGNAL_PEPTIDE (PHOBIUS); NON_CYTOPLASMIC_DOMAIN (PHOBIUS); SIGNAL_PEPTIDE_H_REGION (PHOBIUS); SIGNAL_PEPTIDE_N_REGION (PHOBIUS); TRANSMEMBRANE (PHOBIUS); SIGNAL_PEPTIDE_C_REGION (PHOBIUS); CYTOPLASMIC_DOMAIN (PHOBIUS); SSF81901 (SUPERFAMILY); SSF81901 (SUPERFAMILY); TMhelix (TMHMM); TMhelix (TMHMM)                                                                                                                                                                                                                                                                                                                                                                                          |
| 1075 | c28558_g1_i3_len_770_path_3267_0_205_1756_206_532_2083_533_769_3                                       | 22  | ---NA---                           | 257 |           |        | 0.13  | NON_CYTOPLASMIC_DOMAIN (PHOBIUS); CYTOPLASMIC_DOMAIN (PHOBIUS); TRANSMEMBRANE (PHOBIUS); TRANSMEMBRANE (PHOBIUS); CYTOPLASMIC_DOMAIN (PHOBIUS); TMhelix (TMHMM); TMhelix (TMHMM)                                                                                                                                                                                                                                                                                                                                                                                                                                                                                                                                                                                                                                                                                                                                                       |
| 1076 | c28572_g1_i1_len_1648_path_1822_0_43_3535_44_48_1872_49_1647_3                                         | 242 | serine proteinase stubble-like     | 550 | 4.84E-69  | 56.10% | 0.102 | IPR001314 (PRINTS); IPR001254 (SMART); IPR001254 (PFAM); G3DSA:2.40.10.10 (GENE3D); G3DSA:2.40.10.10 (GENE3D); PTHR24268 (PANTHER); IPR001254 (PROSITE_PROFILES); IPR009003 (SUPERFAMILY)                                                                                                                                                                                                                                                                                                                                                                                                                                                                                                                                                                                                                                                                                                                                              |

|      |                                                                                                       |     |                                                          |      |          |        |       |                                                                                                                                                                                                                                                                                                                                                                                                                                                                                                                                                                                                                                                                                                                                                                                                                                                                                                                                                                                                                                                                                                                                                    |
|------|-------------------------------------------------------------------------------------------------------|-----|----------------------------------------------------------|------|----------|--------|-------|----------------------------------------------------------------------------------------------------------------------------------------------------------------------------------------------------------------------------------------------------------------------------------------------------------------------------------------------------------------------------------------------------------------------------------------------------------------------------------------------------------------------------------------------------------------------------------------------------------------------------------------------------------------------------------------------------------------------------------------------------------------------------------------------------------------------------------------------------------------------------------------------------------------------------------------------------------------------------------------------------------------------------------------------------------------------------------------------------------------------------------------------------|
| 1077 | c28587_g1_i1_len_2413_path_2920_0_520_3441_521_940_3864_941_1313_4763_1314_1457_49_07_1458_2412_3     | 184 | low-density lipoprotein receptor-related protein partial | 799  | 2.26E-57 | 48.20% | 0.118 | IPR002172 (PRINTS); IPR002172 (SMART); IPR001881 (SMART); IPR000742 (SMART); IPR002172 (PFAM); IPR002172 (G3DSA:4.10.400.GENE3D); G3DSA:2.10.25.10 (GENE3D); IPR002172 (G3DSA:4.10.400.GENE3D); IPR002172 (G3DSA:4.10.400.GENE3D); IPR011042 (G3DSA:2.120.10.GENE3D); IPR002172 (G3DSA:4.10.400.GENE3D); IPR001881 (PFAM); PTHR10529 (PANTHER); PTHR10529:SF204 (PANTHER); IPR018097 (PROSITE_PATTERNS); IPR000152 (PROSITE_PATTERNS); IPR023415 (PROSITE_PATTERNS); IPR023415 (PROSITE_PATTERNS); IPR023415 (PROSITE_PATTERNS); IPR013032 (PROSITE_PATTERNS); IPR013032 (PROSITE_PATTERNS); IPR023415 (PROSITE_PATTERNS); IPR002172 (PROSITE_PROFILES); IPR000742 (PROSITE_PROFILES); IPR002172 (PROSITE_PROFILES); IPR002172 (PROSITE_PROFILES); IPR002172 (PROSITE_PROFILES); IPR002172 (SUPERFAMILY); SSF63825 (SUPERFAMILY); SSF57196 (SUPERFAMILY); IPR002172 (SUPERFAMILY); IPR002172 (SUPERFAMILY); IPR002172 (SUPERFAMILY)                                                                                                                                                                                                                |
| 1078 | c28587_g1_i2_len_3135_path_2920_0_520_3441_521_940_3861_941_943_3864_944_1316_4237_1317_1842_4763_1_3 | 298 | vitellogenin receptor                                    | 1039 | 1.86E-48 | 49.30% | 0.118 | IPR002172 (PRINTS); IPR002172 (SMART); IPR000742 (SMART); IPR001881 (SMART); IPR002172 (PFAM); IPR002172 (G3DSA:4.10.400.GENE3D); G3DSA:2.10.25.10 (GENE3D); IPR002172 (G3DSA:4.10.400.GENE3D); IPR002172 (G3DSA:4.10.400.GENE3D); IPR002172 (G3DSA:4.10.400.GENE3D); IPR001881 (PFAM); PTHR10529:SF204 (PANTHER); PTHR10529 (PANTHER); IPR023415 (PROSITE_PATTERNS); IPR023415 (PROSITE_PATTERNS); IPR013032 (PROSITE_PATTERNS); IPR023415 (PROSITE_PATTERNS); IPR013032 (PROSITE_PATTERNS); IPR018097 (PROSITE_PATTERNS); IPR023415 (PROSITE_PATTERNS); IPR000152 (PROSITE_PATTERNS); IPR002172 (PROSITE_PROFILES); IPR002172 (PROSITE_PROFILES); IPR002172 (PROSITE_PROFILES); IPR000742 (PROSITE_PROFILES); IPR002172 (SUPERFAMILY); SSF57196 (SUPERFAMILY); IPR002172 (SUPERFAMILY); IPR002172 (SUPERFAMILY); IPR002172 (SUPERFAMILY)                                                                                                                                                                                                                                                                                                         |
| 1079 | c28587_g1_i2_len_3135_path_2920_0_520_3441_521_940_3861_941_943_3864_944_1316_4237_1317_1842_4763_1_4 | 298 | low-density lipoprotein receptor-related protein 1-like  | 1039 | 4.38E-28 | 51.20% | 0.191 | IPR000033 (SMART); IPR011042 (G3DSA:2.120.10.GENE3D); G3DSA:2.10.25.10 (GENE3D); PTHR10529:SF208 (PANTHER); PTHR10529 (PANTHER); CYTOPLASMIC_DOMAIN (PHOBIUS); TRANSMEMBRANE (PHOBIUS); NON_CYTOPLASMIC_DOMAIN (PHOBIUS); TRANSMEMBRANE (PHOBIUS); NON_CYTOPLASMIC_DOMAIN (PHOBIUS); TRANSMEMBRANE (PHOBIUS); CYTOPLASMIC_DOMAIN (PHOBIUS); CYTOPLASMIC_DOMAIN (PHOBIUS); IPR000033 (PROSITE_PROFILES); IPR000033 (PROSITE_PROFILES); SSF63825 (SUPERFAMILY); TMhelix (TMHMM); TMhelix (TMHMM)                                                                                                                                                                                                                                                                                                                                                                                                                                                                                                                                                                                                                                                     |
| 1080 | c28587_g1_i3_len_2942_path_2920_0_520_3441_521_940_3861_941_943_3864_944_1316_4237_1317_1842_4763_1_3 | 307 | vitellogenin receptor                                    | 975  | 2.43E-85 | 45.80% | 0.118 | IPR002172 (PRINTS); IPR001881 (SMART); IPR000033 (SMART); IPR002172 (SMART); IPR000742 (SMART); IPR002172 (PFAM); IPR001881 (PFAM); IPR011042 (G3DSA:2.120.10.GENE3D); IPR002172 (G3DSA:4.10.400.GENE3D); IPR002172 (G3DSA:4.10.400.GENE3D); G3DSA:2.10.25.10 (GENE3D); G3DSA:2.10.25.10 (GENE3D); IPR002172 (G3DSA:4.10.400.GENE3D); PTHR10529 (PANTHER); PTHR10529:SF204 (PANTHER); IPR018097 (PROSITE_PATTERNS); IPR023415 (PROSITE_PATTERNS); IPR023415 (PROSITE_PATTERNS); IPR013032 (PROSITE_PATTERNS); IPR023415 (PROSITE_PATTERNS); IPR013032 (PROSITE_PATTERNS); IPR023415 (PROSITE_PATTERNS); IPR000152 (PROSITE_PATTERNS); NON_CYTOPLASMIC_DOMAIN (PHOBIUS); TRANSMEMBRANE (PHOBIUS); CYTOPLASMIC_DOMAIN (PHOBIUS); IPR000033 (PROSITE_PROFILES); IPR002172 (PROSITE_PROFILES); IPR000033 (PROSITE_PROFILES); IPR000742 (PROSITE_PROFILES); IPR002172 (PROSITE_PROFILES); IPR002172 (PROSITE_PROFILES); IPR000033 (PROSITE_PROFILES); IPR002172 (PROSITE_PROFILES); IPR002172 (SUPERFAMILY); SSF57196 (SUPERFAMILY); IPR002172 (SUPERFAMILY); IPR002172 (SUPERFAMILY); IPR002172 (SUPERFAMILY); SSF63825 (SUPERFAMILY); TMhelix (TMHMM) |
| 1081 | c28592_g1_i1_len_1276_path_1304_0_167_1472_168_433_2914_434_446_1749_447_447_3095_448_459_1762_460_2  | 298 | meprin a subunit beta                                    | 420  | 1.53E-50 | 58.10% | 0.196 | IPR001506 (PRINTS); IPR006026 (SMART); IPR001506 (PFAM); IPR024079 (G3DSA:3.40.390.GENE3D); PTHR10127 (PANTHER); SSF55486 (SUPERFAMILY); TMhelix (TMHMM); TMhelix (TMHMM)                                                                                                                                                                                                                                                                                                                                                                                                                                                                                                                                                                                                                                                                                                                                                                                                                                                                                                                                                                          |
| 1082 | c28592_g1_i2_len_1231_path_2768_0_122_1472_123_388_3081_389_400_1748_401_401_1749_402_402_3095_403_2  | 311 | meprin a subunit beta                                    | 405  | 6.17E-51 | 58.30% | 0.26  | IPR001506 (PRINTS); IPR006026 (SMART); IPR024079 (G3DSA:3.40.390.GENE3D); IPR001506 (PFAM); PTHR10127 (PANTHER); SSF55486 (SUPERFAMILY)                                                                                                                                                                                                                                                                                                                                                                                                                                                                                                                                                                                                                                                                                                                                                                                                                                                                                                                                                                                                            |



|      |                                                                                                        |      |                                                             |     |           |        |       |   |                                                                                                                                                                                                                                                                                                                                                                                                                                                                                                                                                                                                                                                                                                                                                                                                                                                                                          |
|------|--------------------------------------------------------------------------------------------------------|------|-------------------------------------------------------------|-----|-----------|--------|-------|---|------------------------------------------------------------------------------------------------------------------------------------------------------------------------------------------------------------------------------------------------------------------------------------------------------------------------------------------------------------------------------------------------------------------------------------------------------------------------------------------------------------------------------------------------------------------------------------------------------------------------------------------------------------------------------------------------------------------------------------------------------------------------------------------------------------------------------------------------------------------------------------------|
| 1083 | c28595_g1_i1_len_2012_path_1_0_534_536_535_707_709_708_2011_1                                          | 8335 | fk506-binding protein 2 isoform x2                          | 663 | 8.01E-94  | 78.10% | 0.603 | Y | IPR011992 (PFAM); IPR001179 (PFAM); IPR011992 (G3DSA:1.10.238.GENE3D); G3DSA:3.10.50.40 (GENE3D); IPR023566 (PANTHER); PTHR10516:SF252 (PANTHER); IPR018247 (PROSITE_PATTERNS); IPR018247 (PROSITE_PATTERNS); SIGNAL_PEPTIDE_H_REGION (PHOBIUS); SIGNAL_PEPTIDE (PHOBIUS); NON_CYTOPLASMIC_DOMAIN (PHOBIUS); TRANSMEMBRANE (PHOBIUS); CYTOPLASMIC_DOMAIN (PHOBIUS); NON_CYTOPLASMIC_DOMAIN (PHOBIUS); TRANSMEMBRANE (PHOBIUS); CYTOPLASMIC_DOMAIN (PHOBIUS); SIGNAL_PEPTIDE_C_REGION (PHOBIUS); TRANSMEMBRANE (PHOBIUS); NON_CYTOPLASMIC_DOMAIN (PHOBIUS); SIGNAL_PEPTIDE_N_REGION (PHOBIUS); TRANSMEMBRANE (PHOBIUS); TRANSMEMBRANE (PHOBIUS); IPR001179 (PROSITE_PROFILES); IPR002048 (PROSITE_PROFILES); IPR002048 (PROSITE_PROFILES); SignalP-noTM (SIGNALP_EUK); SSF47473 (SUPERFAMILY); SSF54534 (SUPERFAMILY); TMhelix (TMHMM); TMhelix (TMHMM); TMhelix (TMHMM); TMhelix (TMHMM) |
| 1084 | c28595_g1_i2_len_1839_path_1_0_534_709_535_1838_1                                                      | 7585 | fk506-binding protein 2 isoform x2                          | 605 | 6.55E-98  | 79.60% | 0.603 | Y | IPR011992 (G3DSA:1.10.238.GENE3D); IPR001179 (PFAM); IPR011992 (PFAM); G3DSA:3.10.50.40 (GENE3D); IPR023566 (PANTHER); PTHR10516:SF252 (PANTHER); IPR018247 (PROSITE_PATTERNS); IPR018247 (PROSITE_PATTERNS); TRANSMEMBRANE (PHOBIUS); SIGNAL_PEPTIDE_N_REGION (PHOBIUS); NON_CYTOPLASMIC_DOMAIN (PHOBIUS); TRANSMEMBRANE (PHOBIUS); TRANSMEMBRANE (PHOBIUS); CYTOPLASMIC_DOMAIN (PHOBIUS); SIGNAL_PEPTIDE_H_REGION (PHOBIUS); CYTOPLASMIC_DOMAIN (PHOBIUS); SIGNAL_PEPTIDE_C_REGION (PHOBIUS); NON_CYTOPLASMIC_DOMAIN (PHOBIUS); TRANSMEMBRANE (PHOBIUS); SIGNAL_PEPTIDE (PHOBIUS); IPR002048 (PROSITE_PROFILES); IPR002048 (PROSITE_PROFILES); IPR001179 (PROSITE_PROFILES); SignalP-noTM (SIGNALP_EUK); SSF54534 (SUPERFAMILY); SSF47473 (SUPERFAMILY); TMhelix (TMHMM); TMhelix (TMHMM); TMhelix (TMHMM); TMhelix (TMHMM)                                                            |
| 1085 | c28611_g1_i1_len_476_path_4896_0_58_1815_5_9_475_2                                                     | 17   | dehydrogenase reductase sdr family member 4-like isoform x1 | 158 | 1.92E-38  | 75.10% | 0.188 |   | IPR002347 (PRINTS); IPR002198 (PFAM); IPR016040 (G3DSA:3.40.50.GENE3D); PTHR24322:SF239 (PANTHER); PTHR24322 (PANTHER); SSF51735 (SUPERFAMILY)                                                                                                                                                                                                                                                                                                                                                                                                                                                                                                                                                                                                                                                                                                                                           |
| 1086 | c28611_g1_i2_len_2198_path_3185_0_801_1812_802_804_1815_805_1221_2232_1222_1368_23_79_1369_1429_2440_1 | 216  | dehydrogenase reductase sdr family member 4-like isoform x1 | 733 | 8.37E-103 | 74.70% | 0.453 | Y | IPR002347 (PRINTS); IPR002198 (PRINTS); IPR016040 (G3DSA:3.40.50.GENE3D); PF13561 (PFAM); PTHR24322:SF239 (PANTHER); PTHR24322 (PANTHER); IPR020904 (PROSITE_PATTERNS); CYTOPLASMIC_DOMAIN (PHOBIUS); TRANSMEMBRANE (PHOBIUS); NON_CYTOPLASMIC_DOMAIN (PHOBIUS); TRANSMEMBRANE (PHOBIUS); TRANSMEMBRANE (PHOBIUS); CYTOPLASMIC_DOMAIN (PHOBIUS); NON_CYTOPLASMIC_DOMAIN (PHOBIUS); SignalP-noTM (SIGNALP_EUK); SSF51735 (SUPERFAMILY); TMhelix (TMHMM); TMhelix (TMHMM)                                                                                                                                                                                                                                                                                                                                                                                                                  |
| 1087 | c28611_g1_i3_len_1615_path_1593_0_218_1812_219_221_1815_222_638_2232_639_785_2379_786_846_2440_847_0   | 232  | dehydrogenase reductase sdr family member 4-like isoform x1 | 539 | 7.76E-105 | 74.60% | 0.301 |   | IPR002347 (PRINTS); IPR002198 (PRINTS); PF13561 (PFAM); IPR016040 (G3DSA:3.40.50.GENE3D); PTHR24322:SF239 (PANTHER); PTHR24322 (PANTHER); IPR020904 (PROSITE_PATTERNS); NON_CYTOPLASMIC_DOMAIN (PHOBIUS); TRANSMEMBRANE (PHOBIUS); CYTOPLASMIC_DOMAIN (PHOBIUS); TRANSMEMBRANE (PHOBIUS); NON_CYTOPLASMIC_DOMAIN (PHOBIUS); SSF51735 (SUPERFAMILY); TMhelix (TMHMM); TMhelix (TMHMM)                                                                                                                                                                                                                                                                                                                                                                                                                                                                                                     |
| 1088 | c28624_g1_i1_len_1964_path_1992_0_1963_4                                                               | 301  | chymotrypsinogen b isoform x2                               | 643 | 5.46E-133 | 64.30% | 0.189 |   | IPR001314 (PRINTS); IPR001254 (SMART); IPR001254 (PFAM); G3DSA:2.40.10.10 (GENE3D); G3DSA:2.40.10.10 (GENE3D); G3DSA:2.20.100.10 (GENE3D); PTHR24265 (PANTHER); PTHR24265:SF76 (PANTHER); IPR018114 (PROSITE_PATTERNS); IPR018114 (PROSITE_PATTERNS); NON_CYTOPLASMIC_DOMAIN (PHOBIUS); TRANSMEMBRANE (PHOBIUS); CYTOPLASMIC_DOMAIN (PHOBIUS); TRANSMEMBRANE (PHOBIUS); CYTOPLASMIC_DOMAIN (PHOBIUS); NON_CYTOPLASMIC_DOMAIN (PHOBIUS); IPR000884 (PROSITE_PROFILES); IPR001254 (PROSITE_PROFILES); IPR009003 (SUPERFAMILY); TMhelix (TMHMM); TMhelix (TMHMM)                                                                                                                                                                                                                                                                                                                            |

|      |                                                                                                         |      |                                                        |     |           |        |         |                                                                                                                                                                                                                                                                                                                                                                                                                                                                                                                                                                                                                                                                                                 |
|------|---------------------------------------------------------------------------------------------------------|------|--------------------------------------------------------|-----|-----------|--------|---------|-------------------------------------------------------------------------------------------------------------------------------------------------------------------------------------------------------------------------------------------------------------------------------------------------------------------------------------------------------------------------------------------------------------------------------------------------------------------------------------------------------------------------------------------------------------------------------------------------------------------------------------------------------------------------------------------------|
| 1089 | c28625_g1_i1_len_1859_path_105_0_456_562_4_57_458_564_459_709_815_710_925_1029_926_1614_1716_1615_2     | 119  | adp-ribosylation factor-like protein 3                 | 619 | 1.25E-86  | 65.60% | 0.245   | IPR006689 (PRINTS); IPR024156 (SMART); IPR006687 (SMART); IPR027417 (G3DSA:3.40.50.GENE3D); IPR006689 (PFAM); PTHR11711:SF15 (PANTHER); PTHR11711 (PANTHER); TRANSMEMBRANE (PHOBIUS); NON_CYTOPLASMIC_DOMAIN (PHOBIUS); SIGNAL_PEPTIDE_H_REGION (PHOBIUS); CYTOPLASMIC_DOMAIN (PHOBIUS); CYTOPLASMIC_DOMAIN (PHOBIUS); SIGNAL_PEPTIDE_C_REGION (PHOBIUS); TRANSMEMBRANE (PHOBIUS); NON_CYTOPLASMIC_DOMAIN (PHOBIUS); SIGNAL_PEPTIDE (PHOBIUS); TRANSMEMBRANE (PHOBIUS); SIGNAL_PEPTIDE_N_REGION (PHOBIUS); TRANSMEMBRANE (PHOBIUS); NON_CYTOPLASMIC_DOMAIN (PHOBIUS); IPR024156 (PROSITE_PROFILES); IPR027417 (SUPERFAMILY); TMhelix (TMHMM); TMhelix (TMHMM); TMhelix (TMHMM); TMhelix (TMHMM) |
| 1090 | c28625_g1_i2_len_1643_path_105_0_456_562_4_57_458_564_459_709_1029_710_1398_1716_1_399_1403_1721_1_2    | 73   | adp-ribosylation factor-like protein 3                 | 547 | 3.34E-87  | 65.50% | 0.245   | IPR006689 (PRINTS); IPR006687 (SMART); IPR024156 (SMART); IPR006689 (PFAM); IPR027417 (G3DSA:3.40.50.GENE3D); PTHR11711:SF15 (PANTHER); PTHR11711 (PANTHER); TRANSMEMBRANE (PHOBIUS); TRANSMEMBRANE (PHOBIUS); NON_CYTOPLASMIC_DOMAIN (PHOBIUS); NON_CYTOPLASMIC_DOMAIN (PHOBIUS); NON_CYTOPLASMIC_DOMAIN (PHOBIUS); CYTOPLASMIC_DOMAIN (PHOBIUS); TRANSMEMBRANE (PHOBIUS); CYTOPLASMIC_DOMAIN (PHOBIUS); IPR024156 (PROSITE_PROFILES); IPR027417 (SUPERFAMILY); TMhelix (TMHMM); TMhelix (TMHMM); TMhelix (TMHMM); TMhelix (TMHMM)                                                                                                                                                             |
| 1091 | c28635_g1_i1_len_1203_path_1236_0_29_2458_30_30_1266_31_98_1334_99_100_1336_101_30_3_1539_304_306_15_5  | 3080 | hornerin isoform x2                                    | 393 | 2.38E-29  | 48.00% | 0.761 Y | IPR001314 (PRINTS); IPR001254 (SMART); G3DSA:2.40.10.10 (GENE3D); G3DSA:2.40.10.10 (GENE3D); IPR001254 (PFAM); PTHR24268 (PANTHER); NON_CYTOPLASMIC_DOMAIN (PHOBIUS); SIGNAL_PEPTIDE_H_REGION (PHOBIUS); SIGNAL_PEPTIDE_C_REGION (PHOBIUS); SIGNAL_PEPTIDE (PHOBIUS); SIGNAL_PEPTIDE_N_REGION (PHOBIUS); IPR001254 (PROSITE_PROFILES); SignalP-noTM (SIGNALP_EUK); IPR009003 (SUPERFAMILY); TMhelix (TMHMM)                                                                                                                                                                                                                                                                                     |
| 1092 | c28636_g1_i1_len_1626_path_313_0_1625_4                                                                 | 511  | prophenoloxidase activating factor                     | 537 | 3.83E-132 | 65.60% | 0.119   | IPR001314 (PRINTS); IPR001254 (SMART); G3DSA:2.40.10.10 (GENE3D); G3DSA:2.40.10.10 (GENE3D); IPR001254 (PFAM); G3DSA:2.40.10.10 (GENE3D); PTHR24268:SF95 (PANTHER); PTHR24268 (PANTHER); IPR018114 (PROSITE_PATTERNS); TRANSMEMBRANE (PHOBIUS); CYTOPLASMIC_DOMAIN (PHOBIUS); CYTOPLASMIC_DOMAIN (PHOBIUS); NON_CYTOPLASMIC_DOMAIN (PHOBIUS); TRANSMEMBRANE (PHOBIUS); IPR001254 (PROSITE_PROFILES); IPR009003 (SUPERFAMILY); TMhelix (TMHMM); TMhelix (TMHMM)                                                                                                                                                                                                                                  |
| 1093 | c28638_g1_i4_len_1750_path_713_0_329_1043_330_535_1249_536_678_1392_679_1749_2                          | 821  | di-n-acetylchitobiase                                  | 575 | 1.17E-113 | 63.00% | 0.410 Y | IPR011583 (SMART); IPR001223 (PFAM); IPR013781 (G3DSA:3.20.20.GENE3D); PTHR11177 (PANTHER); PTHR11177:SF146 (PANTHER); TRANSMEMBRANE (PHOBIUS); CYTOPLASMIC_DOMAIN (PHOBIUS); NON_CYTOPLASMIC_DOMAIN (PHOBIUS); IPR017853 (SUPERFAMILY); TMhelix (TMHMM)                                                                                                                                                                                                                                                                                                                                                                                                                                        |
| 1094 | c28644_g2_i1_len_539_path_1002_0_75_1122_7_6_538_1                                                      | 68   | serine protease inhibitor dipetalogastin-like          | 180 | 3.46E-08  | 60.70% | 0.338   | IPR002350 (SMART); IPR002350 (PFAM); G3DSA:3.30.60.30 (GENE3D); IPR002350 (PROSITE_PATTERNS); SIGNAL_PEPTIDE_H_REGION (PHOBIUS); SIGNAL_PEPTIDE_N_REGION (PHOBIUS); NON_CYTOPLASMIC_DOMAIN (PHOBIUS); SIGNAL_PEPTIDE_C_REGION (PHOBIUS); SIGNAL_PEPTIDE (PHOBIUS); IPR002350 (PROSITE_PROFILES); SSF100895 (SUPERFAMILY)                                                                                                                                                                                                                                                                                                                                                                        |
| 1095 | c28644_g2_i2_len_930_path_1002_0_75_1078_7_6_119_1122_120_582_1582_583_583_23_584_6_87_1686_688_712_1_0 | 190  | serine protease inhibitor kazal-type 6-like isoform x1 | 310 | 4.78E-09  | 62.20% | 0.293   | IPR002350 (SMART); G3DSA:3.30.60.30 (GENE3D); IPR002350 (PFAM); IPR002350 (PROSITE_PATTERNS); CYTOPLASMIC_DOMAIN (PHOBIUS); TRANSMEMBRANE (PHOBIUS); CYTOPLASMIC_DOMAIN (PHOBIUS); NON_CYTOPLASMIC_DOMAIN (PHOBIUS); TRANSMEMBRANE (PHOBIUS); IPR002350 (PROSITE_PROFILES); SSF100895 (SUPERFAMILY); TMhelix (TMHMM)                                                                                                                                                                                                                                                                                                                                                                            |
| 1096 | c28657_g1_i1_len_295_path_4578_0_16_1228_1_7_294_4                                                      | 10   | flowering locus t a1                                   | 93  | 1.54E-10  | 56.30% | 0.11    | IPR008914 (PFAM); IPR008914 (G3DSA:3.90.280.GENE3D); PTHR11362 (PANTHER); IPR008914 (SUPERFAMILY)                                                                                                                                                                                                                                                                                                                                                                                                                                                                                                                                                                                               |

|      |                                                                                                        |       |                                     |     |           |        |         |                                                                                                                                                                                                                                                                                                                                                                                                                                                                                                                                                                                                                                                                                      |
|------|--------------------------------------------------------------------------------------------------------|-------|-------------------------------------|-----|-----------|--------|---------|--------------------------------------------------------------------------------------------------------------------------------------------------------------------------------------------------------------------------------------------------------------------------------------------------------------------------------------------------------------------------------------------------------------------------------------------------------------------------------------------------------------------------------------------------------------------------------------------------------------------------------------------------------------------------------------|
| 1097 | c28657_g1_i2_len_1938_path_3101_0_913_4015_914_916_4018_917_952_967_953_976_991_977_1132_4300_1133_5   | 713   | flowering locus protein t           | 646 | 3.46E-24  | 60.40% | 0.159   | IPR008914 (PFAM); IPR008914 (G3DSA:3.90.280.GENE3D); PTHR11362 (PANTHER); IPR001858 (PROSITE_PATTERNS); NON_CYTOPLASMIC_DOMAIN (PHOBIUS); TRANSMEMBRANE (PHOBIUS); TRANSMEMBRANE (PHOBIUS); CYTOPLASMIC_DOMAIN (PHOBIUS); NON_CYTOPLASMIC_DOMAIN (PHOBIUS); TRANSMEMBRANE (PHOBIUS); NON_CYTOPLASMIC_DOMAIN (PHOBIUS); TRANSMEMBRANE (PHOBIUS); NON_CYTOPLASMIC_DOMAIN (PHOBIUS); TRANSMEMBRANE (PHOBIUS); CYTOPLASMIC_DOMAIN (PHOBIUS); CYTOPLASMIC_DOMAIN (PHOBIUS); CYTOPLASMIC_DOMAIN (PHOBIUS); TRANSMEMBRANE (PHOBIUS); TRANSMEMBRANE (PHOBIUS); IPR008914 (SUPERFAMILY); TMhelix (TMHMM); TMhelix (TMHMM); TMhelix (TMHMM); TMhelix (TMHMM); TMhelix (TMHMM); TMhelix (TMHMM) |
| 1098 | c28674_g1_i1_len_2368_path_53_0_1512_1564_1513_1529_1581_1530_2298_2350_2299_2299_2351_2300_2367_0     | 316   | heat shock 70 kda protein cognate 4 | 778 | 5.12E-49  | 87.30% | 0.168   | IPR013126 (PFAM); IPR029048 (G3DSA:1.20.1270.GENE3D); PTHR19375:SF142 (PANTHER); PTHR19375 (PANTHER); CYTOPLASMIC_DOMAIN (PHOBIUS); TRANSMEMBRANE (PHOBIUS); CYTOPLASMIC_DOMAIN (PHOBIUS); NON_CYTOPLASMIC_DOMAIN (PHOBIUS); TRANSMEMBRANE (PHOBIUS); NON_CYTOPLASMIC_DOMAIN (PHOBIUS); TRANSMEMBRANE (PHOBIUS); NON_CYTOPLASMIC_DOMAIN (PHOBIUS); TRANSMEMBRANE (PHOBIUS); CYTOPLASMIC_DOMAIN (PHOBIUS); TRANSMEMBRANE (PHOBIUS); TRANSMEMBRANE (PHOBIUS); TRANSMEMBRANE (PHOBIUS); IPR029048 (SUPERFAMILY); TMhelix (TMHMM); TMhelix (TMHMM); TMhelix (TMHMM); TMhelix (TMHMM)                                                                                                     |
| 1099 | c28686_g2_i1_len_1401_path_3867_0_1253_512_1_1254_1294_5162_1295_1295_2570_1296_1296_6167_1297_1320_0  | 47    | carboxypeptidase d                  | 462 | 7.48E-148 | 72.70% | 0.102   | IPR000834 (PRINTS); IPR000834 (SMART); IPR014766 (G3DSA:2.60.40.GENE3D); G3DSA:3.40.630.10 (GENE3D); IPR000834 (PFAM); PF13620 (PFAM); PTHR11532 (PANTHER); IPR000834 (PROSITE_PATTERNS); IPR000834 (PROSITE_PATTERNS); SSF53187 (SUPERFAMILY); IPR008969 (SUPERFAMILY)                                                                                                                                                                                                                                                                                                                                                                                                              |
| 1100 | c28688_g1_i1_len_1699_path_1971_0_463_2428_464_464_129_465_1144_306_1145_1698_0                        | 229   | kielin chordin-like protein         | 561 | 1.34E-34  | 48.20% | 0.162   | IPR01791 (SMART); CYTOPLASMIC_DOMAIN (PHOBIUS); NON_CYTOPLASMIC_DOMAIN (PHOBIUS); TRANSMEMBRANE (PHOBIUS); IPR013320 (SUPERFAMILY); TMhelix (TMHMM)                                                                                                                                                                                                                                                                                                                                                                                                                                                                                                                                  |
| 1101 | c28694_g1_i1_len_233_path_446_0_192_4050_1_93_232_4                                                    | 12    | chitinase partial                   | 78  | 1.26E-18  | 63.70% | 0.101   | IPR001223 (PFAM); IPR013781 (G3DSA:3.20.20.GENE3D); PTHR11177 (PANTHER); PTHR11177:SF112 (PANTHER); IPR017853 (SUPERFAMILY)                                                                                                                                                                                                                                                                                                                                                                                                                                                                                                                                                          |
| 1102 | c28694_g2_i1_len_238_path_812_0_76_889_77_150_986_151_180_6103_181_187_3804_188_23_7_4                 | 467   | chitinase partial                   | 79  | 3.88E-21  | 65.70% | 0.112   | IPR001223 (PFAM); IPR029070 (G3DSA:3.10.50.GENE3D); PTHR11177:SF112 (PANTHER); PTHR11177 (PANTHER); IPR029070 (SUPERFAMILY)                                                                                                                                                                                                                                                                                                                                                                                                                                                                                                                                                          |
| 1103 | c28694_g3_i1_len_396_path_3929_0_7_3606_8_31_3630_32_98_3697_99_170_986_171_200_44_84_201_242_4818_2_4 | 23414 | chitinase partial                   | 132 | 6.01E-34  | 60.30% | 0.107   | IPR029070 (G3DSA:3.10.50.GENE3D); IPR013781 (G3DSA:3.20.20.GENE3D); IPR001223 (PFAM); PTHR11177:SF112 (PANTHER); PTHR11177 (PANTHER); IPR029070 (SUPERFAMILY); IPR017853 (SUPERFAMILY)                                                                                                                                                                                                                                                                                                                                                                                                                                                                                               |
| 1104 | c28694_g4_i1_len_563_path_5320_0_125_5440_126_167_5174_168_191_5504_192_215_5222_2_16_252_6016_253_2_3 | 2471  | chitinase 2                         | 188 | 1.75E-51  | 68.50% | 0.327   | IPR011583 (SMART); IPR001223 (PFAM); IPR013781 (G3DSA:3.20.20.GENE3D); PTHR11177 (PANTHER); PTHR11177:SF112 (PANTHER); IPR001579 (PROSITE_PATTERNS); SIGNAL_PEPTIDE_H_REGION (PHOBIUS); SIGNAL_PEPTIDE_C_REGION (PHOBIUS); SIGNAL_PEPTIDE (PHOBIUS); NON_CYTOPLASMIC_DOMAIN (PHOBIUS); SIGNAL_PEPTIDE_N_REGION (PHOBIUS); IPR017853 (SUPERFAMILY); TMhelix (TMHMM)                                                                                                                                                                                                                                                                                                                   |
| 1105 | c28699_g2_i1_len_1988_path_53_0_1204_1256_1205_1218_1270_1219_1219_2762_1220_1799_3212_1800_1987_1     | 203   | low quality protein: agrin          | 657 | 8.42E-39  | 52.00% | 0.343 Y | IPR002350 (SMART); G3DSA:2.40.50.120 (GENE3D); IPR004850 (PFAM); IPR002350 (PFAM); G3DSA:3.30.60.30 (GENE3D); PTHR10913:SF45 (PANTHER); PTHR10913 (PANTHER); TRANSMEMBRANE (PHOBIUS); NON_CYTOPLASMIC_DOMAIN (PHOBIUS); NON_CYTOPLASMIC_DOMAIN (PHOBIUS); TRANSMEMBRANE (PHOBIUS); TRANSMEMBRANE (PHOBIUS); TRANSMEMBRANE (PHOBIUS); CYTOPLASMIC_DOMAIN (PHOBIUS); CYTOPLASMIC_DOMAIN (PHOBIUS); CYTOPLASMIC_DOMAIN (PHOBIUS); NON_CYTOPLASMIC_DOMAIN (PHOBIUS); IPR004850 (PROSITE_PROFILES); IPR002350 (PROSITE_PROFILES); IPR008993 (SUPERFAMILY); SSF100895 (SUPERFAMILY); TMhelix (TMHMM); TMhelix (TMHMM)                                                                      |

|      |                                                                                                        |      |                                                          |     |          |        |         |                                                                                                                                                                                                                                                                                                                                                                                                                                                                                                                                                                                                                                    |
|------|--------------------------------------------------------------------------------------------------------|------|----------------------------------------------------------|-----|----------|--------|---------|------------------------------------------------------------------------------------------------------------------------------------------------------------------------------------------------------------------------------------------------------------------------------------------------------------------------------------------------------------------------------------------------------------------------------------------------------------------------------------------------------------------------------------------------------------------------------------------------------------------------------------|
| 1106 | c28699_g2_i2_len_1973_path_53_0_1204_2762_1205_1784_3212_1785_1972_1                                   | 200  | low quality protein: agrin                               | 652 | 1.26E-38 | 52.00% | 0.343 Y | IPR002350 (SMART); IPR004850 (PFAM); IPR002350 (PFAM); G3DSA:2.40.50.120 (GENE3D); G3DSA:3.30.60.30 (GENE3D); PTHR10913 (PANTHER); PTHR10913:SF45 (PANTHER); NON_CYTOPLASMIC_DOMAIN (PHOBIUS); TRANSMEMBRANE (PHOBIUS); CYTOPLASMIC_DOMAIN (PHOBIUS); CYTOPLASMIC_DOMAIN (PHOBIUS); TRANSMEMBRANE (PHOBIUS); NON_CYTOPLASMIC_DOMAIN (PHOBIUS); TRANSMEMBRANE (PHOBIUS); NON_CYTOPLASMIC_DOMAIN (PHOBIUS); IPR002350 (PROSITE_PROFILES); IPR004850 (PROSITE_PROFILES); IPR008993 (SUPERFAMILY); SSF100895 (SUPERFAMILY); TMhelix (TMHMM); TMhelix (TMHMM)                                                                           |
| 1107 | c28754_g1_i1_len_1056_path_1_0_611_1026_612_1055_1                                                     | 31   | dnaj homolog subfamily b member 11                       | 352 | 3.76E-96 | 81.40% | 0.510 Y | IPR001623 (PRINTS); IPR001623 (SMART); G3DSA:2.60.260.20 (GENE3D); IPR001623 (G3DSA:1.10.287.GENE3D); IPR001623 (PFAM); PTHR24077:SF210 (PANTHER); PTHR24077 (PANTHER); IPR018253 (PROSITE_PATTERNS); SIGNAL_PEPTIDE_C_REGION (PHOBIUS); SIGNAL_PEPTIDE (PHOBIUS); NON_CYTOPLASMIC_DOMAIN (PHOBIUS); SIGNAL_PEPTIDE_N_REGION (PHOBIUS); SIGNAL_PEPTIDE_H_REGION (PHOBIUS); IPR001623 (PROSITE_PROFILES); SignalP-TM (SIGNALP_EUK); IPR001623 (SUPERFAMILY); TMhelix (TMHMM)                                                                                                                                                        |
| 1108 | c28754_g1_i2_len_1562_path_1_0_611_613_612_1024_1026_1025_1468_1470_1469_1480_1482_1481_1549_1470_1_1  | 83   | dnaj homolog subfamily b member 11                       | 521 | 0        | 84.20% | 0.510 Y | IPR001623 (PRINTS); IPR001623 (SMART); G3DSA:2.60.260.20 (GENE3D); IPR001623 (G3DSA:1.10.287.GENE3D); G3DSA:2.60.260.20 (GENE3D); IPR002939 (PFAM); IPR001623 (PFAM); PTHR24077:SF210 (PANTHER); PTHR24077 (PANTHER); IPR018253 (PROSITE_PATTERNS); SIGNAL_PEPTIDE_N_REGION (PHOBIUS); SIGNAL_PEPTIDE (PHOBIUS); SIGNAL_PEPTIDE_C_REGION (PHOBIUS); SIGNAL_PEPTIDE_H_REGION (PHOBIUS); NON_CYTOPLASMIC_DOMAIN (PHOBIUS); TRANSMEMBRANE (PHOBIUS); CYTOPLASMIC_DOMAIN (PHOBIUS); IPR001623 (PROSITE_PROFILES); SignalP-TM (SIGNALP_EUK); IPR008971 (SUPERFAMILY); IPR001623 (SUPERFAMILY); IPR008971 (SUPERFAMILY); TMhelix (TMHMM) |
| 1109 | c28757_g3_i1_len_1359_path_1843_0_620_2460_621_648_3959_649_1358_5                                     | 103  | xanthine dehydrogenase oxidase                           | 447 | 1.62E-11 | 55.10% | 0.194   | IPR002888 (G3DSA:1.10.150.GENE3D); IPR002888 (PFAM); PTHR11908:SF32 (PANTHER); PTHR11908 (PANTHER); TRANSMEMBRANE (PHOBIUS); TRANSMEMBRANE (PHOBIUS); CYTOPLASMIC_DOMAIN (PHOBIUS); TRANSMEMBRANE (PHOBIUS); CYTOPLASMIC_DOMAIN (PHOBIUS); NON_CYTOPLASMIC_DOMAIN (PHOBIUS); NON_CYTOPLASMIC_DOMAIN (PHOBIUS); IPR002888 (SUPERFAMILY)                                                                                                                                                                                                                                                                                             |
| 1110 | c28777_g1_i1_len_1945_path_209_0_804_1010_805_1830_2034_1831_1857_2034_1858_1884_2061_1885_1905_208_1  | 251  | carbohydrate sulfotransferase 11                         | 648 | 7.09E-30 | 49.50% | 0.14    | IPR005331 (PFAM); IPR018011 (PANTHER); NON_CYTOPLASMIC_DOMAIN (PHOBIUS); TRANSMEMBRANE (PHOBIUS); CYTOPLASMIC_DOMAIN (PHOBIUS); TMhelix (TMHMM)                                                                                                                                                                                                                                                                                                                                                                                                                                                                                    |
| 1111 | c28786_g1_i1_len_2008_path_2464_0_1243_370_5_1244_1244_52_1245_1268_223_1269_1298_9_8_1299_1329_4012_0 | 699  | tyrosine--trna cytoplasmic                               | 662 | 0        | 72.00% | 0.129   | IPR002307 (PRINTS); G3DSA:1.10.240.10 (GENE3D); IPR002547 (PFAM); IPR002307 (TIGRFAM); IPR012340 (G3DSA:2.40.50.GENE3D); IPR014729 (G3DSA:3.40.50.GENE3D); IPR002305 (PFAM); PTHR11946 (PANTHER); IPR002547 (PROSITE_PROFILES); IPR010987 (SUPERFAMILY); SSF52374 (SUPERFAMILY); IPR012340 (SUPERFAMILY)                                                                                                                                                                                                                                                                                                                           |
| 1112 | c28786_g1_i2_len_2233_path_2464_0_1243_370_5_1244_1244_52_1245_1268_223_1269_1298_3_757_1299_1523_98_0 | 1249 | tyrosine--trna cytoplasmic                               | 737 | 0        | 79.80% | 0.129   | IPR002307 (PRINTS); IPR014729 (G3DSA:3.40.50.GENE3D); IPR002305 (PFAM); IPR012340 (G3DSA:2.40.50.GENE3D); IPR002307 (TIGRFAM); IPR002547 (PFAM); G3DSA:1.10.240.10 (GENE3D); PTHR11946 (PANTHER); IPR002547 (PROSITE_PROFILES); IPR012340 (SUPERFAMILY); SSF52374 (SUPERFAMILY); IPR010987 (SUPERFAMILY)                                                                                                                                                                                                                                                                                                                           |
| 1113 | c28791_g1_i1_len_2023_path_2282_0_1523_379_8_1524_1525_221_1526_2022_1                                 | 306  | uncharacterized family 31 glucosidase k1a1161 isoform x4 | 668 | 8.33E-90 | 69.30% | 0.146   | IPR000322 (PFAM); PTHR22762:SF73 (PANTHER); PTHR22762 (PANTHER); SSF51011 (SUPERFAMILY); IPR017853 (SUPERFAMILY)                                                                                                                                                                                                                                                                                                                                                                                                                                                                                                                   |
| 1114 | c28803_g1_i1_len_2551_path_449_0_1237_94_1_238_1641_169_1642_1719_247_1720_1936_18_1937_2132_2495_21_2 | 178  | pitslre serine threonine-protein kinase cdc21            | 850 | 0        | 81.70% | 0.109   | Coil (COILS); IPR002290 (SMART); G3DSA:1.10.510.10 (GENE3D); IPR000719 (PFAM); G3DSA:3.30.200.20 (GENE3D); PTHR24056 (PANTHER); PTHR24056:SF107 (PANTHER); IPR008271 (PROSITE_PATTERNS); CYTOPLASMIC_DOMAIN (PHOBIUS); NON_CYTOPLASMIC_DOMAIN (PHOBIUS); TRANSMEMBRANE (PHOBIUS); TRANSMEMBRANE (PHOBIUS); NON_CYTOPLASMIC_DOMAIN (PHOBIUS); IPR000719 (PROSITE_PROFILES); IPR011009 (SUPERFAMILY); TMhelix (TMHMM); TMhelix (TMHMM)                                                                                                                                                                                               |

|      |                                                                                                        |      |                                                           |     |           |        |       |                                                                                                                                                                                                                                                                                                                                                                                                                                                                                                                                           |
|------|--------------------------------------------------------------------------------------------------------|------|-----------------------------------------------------------|-----|-----------|--------|-------|-------------------------------------------------------------------------------------------------------------------------------------------------------------------------------------------------------------------------------------------------------------------------------------------------------------------------------------------------------------------------------------------------------------------------------------------------------------------------------------------------------------------------------------------|
| 1115 | c28803_g1_i2_len_2474_path_449_0_1237_94_1_238_1641_247_1642_1858_2300_1859_1859_18_1860_2055_2495_2_2 | 208  | pitslre serine threonine-protein kinase cdc21             | 824 | 0         | 86.10% | 0.109 | Coil (COILS); IPR002290 (SMART); G3DSA:3.30.200.20 (GENE3D); IPR000719 (PFAM); G3DSA:1.10.510.10 (GENE3D); PTHR24056:SF107 (PANTHER); PTHR24056 (PANTHER); IPR008271 (PROSITE_PATTERNS); TRANSMEMBRANE (PHOBIUS); CYTOPLASMIC_DOMAIN (PHOBIUS); NON_CYTOPLASMIC_DOMAIN (PHOBIUS); TRANSMEMBRANE (PHOBIUS); NON_CYTOPLASMIC_DOMAIN (PHOBIUS); CYTOPLASMIC_DOMAIN (PHOBIUS); IPR000719 (PROSITE_PROFILES); IPR011009 (SUPERFAMILY)                                                                                                          |
| 1116 | c28814_g1_i1_len_1861_path_253_0_789_3956_790_799_1052_800_1434_252_1435_1623_1867_1624_1645_1889_1_1  | 2234 | superoxide dismutase                                      | 604 | 2.84E-79  | 85.20% | 0.156 | IPR001424 (PRINTS); IPR001424 (PFAM); IPR001424 (G3DSA:2.60.40.GENE3D); PTHR10003 (PANTHER); PTHR10003:SF33 (PANTHER); IPR018152 (PROSITE_PATTERNS); IPR018152 (PROSITE_PATTERNS); CYTOPLASMIC_DOMAIN (PHOBIUS); TRANSMEMBRANE (PHOBIUS); CYTOPLASMIC_DOMAIN (PHOBIUS); NON_CYTOPLASMIC_DOMAIN (PHOBIUS); TRANSMEMBRANE (PHOBIUS); IPR001424 (SUPERFAMILY)                                                                                                                                                                                |
| 1117 | c28814_g1_i2_len_1838_path_253_0_789_1043_790_798_1052_799_1433_252_1434_1622_1889_1623_1837_1         | 2817 | superoxide dismutase                                      | 597 | 2.41E-79  | 84.90% | 0.156 | IPR001424 (PRINTS); IPR001424 (PFAM); IPR001424 (G3DSA:2.60.40.GENE3D); PTHR10003:SF33 (PANTHER); PTHR10003 (PANTHER); IPR018152 (PROSITE_PATTERNS); IPR018152 (PROSITE_PATTERNS); CYTOPLASMIC_DOMAIN (PHOBIUS); TRANSMEMBRANE (PHOBIUS); NON_CYTOPLASMIC_DOMAIN (PHOBIUS); IPR001424 (SUPERFAMILY)                                                                                                                                                                                                                                       |
| 1118 | c28820_g2_i1_len_2144_path_1771_0_1151_780_1152_1363_3132_1364_2143_3                                  | 190  | tyrosine-protein phosphatase lar-like isoform x1          | 715 | 5.78E-118 | 83.20% | 0.136 | IPR013106 (SMART); IPR003599 (SMART); IPR003598 (SMART); IPR013783 (G3DSA:2.60.40.GENE3D); PF13895 (PFAM); IPR013106 (PFAM); IPR013783 (G3DSA:2.60.40.GENE3D); PTHR23279:SF9 (PANTHER); PTHR23279 (PANTHER); CYTOPLASMIC_DOMAIN (PHOBIUS); TRANSMEMBRANE (PHOBIUS); NON_CYTOPLASMIC_DOMAIN (PHOBIUS); IPR007110 (PROSITE_PROFILES); IPR007110 (PROSITE_PROFILES); SSF48726 (SUPERFAMILY); SSF48726 (SUPERFAMILY); TMhelix (TMHMM); TMhelix (TMHMM)                                                                                        |
| 1119 | c28820_g2_i2_len_1386_path_1771_0_1151_780_1152_1363_6655_1364_1385_4                                  | 141  | tyrosine-protein phosphatase lar-like isoform x1          | 462 | 4.90E-100 | 87.20% | 0.149 | IPR003599 (SMART); IPR003598 (SMART); IPR013783 (G3DSA:2.60.40.GENE3D); IPR013783 (G3DSA:2.60.40.GENE3D); PF13895 (PFAM); PTHR23279 (PANTHER); PTHR23279:SF9 (PANTHER); NON_CYTOPLASMIC_DOMAIN (PHOBIUS); CYTOPLASMIC_DOMAIN (PHOBIUS); TRANSMEMBRANE (PHOBIUS); IPR007110 (PROSITE_PROFILES); IPR007110 (PROSITE_PROFILES); SSF48726 (SUPERFAMILY); SSF48726 (SUPERFAMILY); TMhelix (TMHMM); TMhelix (TMHMM)                                                                                                                             |
| 1120 | c28825_g2_i1_len_1734_path_3327_0_707_1067_7_708_917_6906_918_1733_3                                   | 107  | gilt-like protein                                         | 578 | 7.82E-56  | 64.50% | 0.133 | IPR004911 (PFAM); IPR004911 (PANTHER); CYTOPLASMIC_DOMAIN (PHOBIUS); TRANSMEMBRANE (PHOBIUS); NON_CYTOPLASMIC_DOMAIN (PHOBIUS); TRANSMEMBRANE (PHOBIUS); CYTOPLASMIC_DOMAIN (PHOBIUS); TMhelix (TMHMM)                                                                                                                                                                                                                                                                                                                                    |
| 1121 | c28825_g2_i3_len_1630_path_6092_0_813_6906_814_1629_3                                                  | 150  | gamma-interferon-inducible lysosomal thiol reductase-like | 544 | 1.05E-59  | 63.20% | 0.133 | IPR004911 (PFAM); IPR004911 (PANTHER); TRANSMEMBRANE (PHOBIUS); CYTOPLASMIC_DOMAIN (PHOBIUS); NON_CYTOPLASMIC_DOMAIN (PHOBIUS); TRANSMEMBRANE (PHOBIUS); NON_CYTOPLASMIC_DOMAIN (PHOBIUS); TRANSMEMBRANE (PHOBIUS); CYTOPLASMIC_DOMAIN (PHOBIUS); TMhelix (TMHMM); TMhelix (TMHMM)                                                                                                                                                                                                                                                        |
| 1122 | c28848_g1_i2_len_1797_path_2593_0_619_3211_620_620_3212_621_797_4737_798_818_3407_819_842_3431_843_1   | 333  | sparc                                                     | 599 | 6.60E-110 | 80.90% | 0.1   | Coil (COILS); IPR003645 (SMART); IPR011992 (G3DSA:1.10.238.GENE3D); G3DSA:3.30.60.30 (GENE3D); IPR019577 (PFAM); PTHR13866:SF14 (PANTHER); PTHR13866 (PANTHER); IPR018247 (PROSITE_PATTERNS); IPR001999 (PROSITE_PATTERNS); TRANSMEMBRANE (PHOBIUS); CYTOPLASMIC_DOMAIN (PHOBIUS); NON_CYTOPLASMIC_DOMAIN (PHOBIUS); NON_CYTOPLASMIC_DOMAIN (PHOBIUS); TRANSMEMBRANE (PHOBIUS); CYTOPLASMIC_DOMAIN (PHOBIUS); TRANSMEMBRANE (PHOBIUS); SSF100895 (SUPERFAMILY); SSF47473 (SUPERFAMILY); TMhelix (TMHMM); TMhelix (TMHMM); TMhelix (TMHMM) |
| 1123 | c28851_g1_i1_len_1097_path_1213_0_454_1665_455_595_92_596_743_1951_744_1096_0                          | 631  | neuferricin -like protein                                 | 360 | 1.15E-81  | 66.50% | 0.109 | IPR001199 (PFAM); IPR001199 (G3DSA:3.10.120.GENE3D); PTHR10281:SF4 (PANTHER); PTHR10281 (PANTHER); TRANSMEMBRANE (PHOBIUS); CYTOPLASMIC_DOMAIN (PHOBIUS); NON_CYTOPLASMIC_DOMAIN (PHOBIUS); TRANSMEMBRANE (PHOBIUS); NON_CYTOPLASMIC_DOMAIN (PHOBIUS); IPR001199 (SUPERFAMILY); TMhelix (TMHMM)                                                                                                                                                                                                                                           |



|      |                                                                                                        |     |                                         |     |           |        |       |                                                                                                                                                                                                                                                                                                                                                                                                                                                                                                                                                                                                                                       |
|------|--------------------------------------------------------------------------------------------------------|-----|-----------------------------------------|-----|-----------|--------|-------|---------------------------------------------------------------------------------------------------------------------------------------------------------------------------------------------------------------------------------------------------------------------------------------------------------------------------------------------------------------------------------------------------------------------------------------------------------------------------------------------------------------------------------------------------------------------------------------------------------------------------------------|
| 1124 | c28851_g1_i2_len_956_path_1213_0_454_92_455_602_1951_603_955_0                                         | 171 | neuferricin-like isoform 2              | 313 | 1.17E-51  | 55.60% | 0.109 | IPR001199 (PFAM); IPR001199 (G3DSA:3.10.120.GENE3D); PTHR10281:SF4 (PANTHER); PTHR10281 (PANTHER); NON_CYTOPLASMIC_DOMAIN (PHOBIUS); TRANSMEMBRANE (PHOBIUS); CYTOPLASMIC_DOMAIN (PHOBIUS); NON_CYTOPLASMIC_DOMAIN (PHOBIUS); TRANSMEMBRANE (PHOBIUS); IPR001199 (SUPERFAMILY); TMhelix (TMHMM)                                                                                                                                                                                                                                                                                                                                       |
| 1125 | c28854_g1_i1_len_1936_path_157_0_1538_1692_1539_1541_1695_1542_1935_0                                  | 152 | adp-ribosylation factor-like protein 4a | 640 | 9.29E-109 | 86.80% | 0.13  | IPR006689 (PRINTS); IPR006687 (SMART); IPR003579 (SMART); IPR024156 (SMART); IPR006689 (PFAM); IPR027417 (G3DSA:3.40.50.GENE3D); IPR005225 (TIGRFAM); PTHR11711:SF121 (PANTHER); PTHR11711 (PANTHER); CYTOPLASMIC_DOMAIN (PHOBIUS); TRANSMEMBRANE (PHOBIUS); NON_CYTOPLASMIC_DOMAIN (PHOBIUS); IPR024156 (PROSITE_PROFILES); IPR027417 (SUPERFAMILY)                                                                                                                                                                                                                                                                                  |
| 1126 | c28859_g1_i1_len_1582_path_3354_0_165_1726_166_1123_2684_1124_1125_2686_1126_1581_1                    | 272 | estradiol 17-beta-dehydrogenase 12      | 521 | 4.10E-70  | 65.60% | 0.142 | IPR002347 (PRINTS); IPR002198 (PRINTS); IPR002198 (PFAM); IPR016040 (G3DSA:3.40.50.GENE3D); PTHR24316:SF68 (PANTHER); PTHR24316 (PANTHER); CYTOPLASMIC_DOMAIN (PHOBIUS); TRANSMEMBRANE (PHOBIUS); NON_CYTOPLASMIC_DOMAIN (PHOBIUS); TRANSMEMBRANE (PHOBIUS); NON_CYTOPLASMIC_DOMAIN (PHOBIUS); SSF51735 (SUPERFAMILY); TMhelix (TMHMM)                                                                                                                                                                                                                                                                                                |
| 1127 | c28859_g1_i2_len_1582_path_1560_0_165_1726_166_1123_2684_1124_1125_2686_1126_1581_1                    | 280 | hydroxysteroid (17-beta)                | 521 | 9.73E-79  | 62.00% | 0.275 | IPR002347 (PRINTS); IPR002198 (PRINTS); IPR002198 (PFAM); IPR016040 (G3DSA:3.40.50.GENE3D); PTHR24316 (PANTHER); PTHR24316:SF68 (PANTHER); TRANSMEMBRANE (PHOBIUS); NON_CYTOPLASMIC_DOMAIN (PHOBIUS); TRANSMEMBRANE (PHOBIUS); NON_CYTOPLASMIC_DOMAIN (PHOBIUS); CYTOPLASMIC_DOMAIN (PHOBIUS); TRANSMEMBRANE (PHOBIUS); NON_CYTOPLASMIC_DOMAIN (PHOBIUS); CYTOPLASMIC_DOMAIN (PHOBIUS); SSF51735 (SUPERFAMILY); TMhelix (TMHMM); TMhelix (TMHMM); TMhelix (TMHMM); TMhelix (TMHMM);                                                                                                                                                   |
| 1128 | c28859_g1_i3_len_1929_path_3354_0_165_3519_166_512_1726_513_1470_2684_1471_1472_2_686_1473_1928_0      | 286 | estradiol 17-beta-dehydrogenase 12      | 637 | 1.92E-69  | 65.40% | 0.2   | IPR002347 (PRINTS); IPR002198 (PFAM); IPR016040 (G3DSA:3.40.50.GENE3D); PTHR24316 (PANTHER); PTHR24316:SF68 (PANTHER); TRANSMEMBRANE (PHOBIUS); NON_CYTOPLASMIC_DOMAIN (PHOBIUS); TRANSMEMBRANE (PHOBIUS); CYTOPLASMIC_DOMAIN (PHOBIUS); NON_CYTOPLASMIC_DOMAIN (PHOBIUS); SSF51735 (SUPERFAMILY); TMhelix (TMHMM)                                                                                                                                                                                                                                                                                                                    |
| 1129 | c28860_g1_i1_len_1745_path_1_0_560_562_561_564_566_565_1551_1553_1552_1646_3658_16_47_1713_1715_1714_5 | 229 | factor d-like protein                   | 581 | 1.12E-78  | 51.10% | 0.112 | IPR001314 (PRINTS); IPR001254 (SMART); IPR001254 (PFAM); G3DSA:2.40.10.10 (GENE3D); G3DSA:2.40.10.10 (GENE3D); G3DSA:2.40.10.10 (GENE3D); PTHR24268:SF95 (PANTHER); PTHR24268 (PANTHER); IPR018114 (PROSITE_PATTERNS); IPR001254 (PROSITE_PROFILES); IPR009003 (SUPERFAMILY)                                                                                                                                                                                                                                                                                                                                                          |
| 1130 | c28867_g1_i1_len_2360_path_2718_0_1291_535_8_1292_2359_1                                               | 239 | casein kinase ii subunit alpha          | 787 | 0         | 95.60% | 0.16  | IPR002290 (SMART); G3DSA:3.30.200.20 (GENE3D); IPR000719 (PFAM); G3DSA:1.10.510.10 (GENE3D); PTHR24054:SF28 (PANTHER); PTHR24054 (PANTHER); IPR008271 (PROSITE_PATTERNS); IPR017441 (PROSITE_PATTERNS); CYTOPLASMIC_DOMAIN (PHOBIUS); NON_CYTOPLASMIC_DOMAIN (PHOBIUS); TRANSMEMBRANE (PHOBIUS); IPR000719 (PROSITE_PROFILES); IPR011009 (SUPERFAMILY); TMhelix (TMHMM)                                                                                                                                                                                                                                                               |
| 1131 | c28867_g1_i2_len_2642_path_2718_0_1291_401_0_1292_2217_7778_2218_2219_7978_2220_223_0_24_2231_2641_1   | 491 | casein kinase ii subunit alpha          | 875 | 0         | 95.10% | 0.16  | IPR002290 (SMART); IPR000719 (PFAM); G3DSA:1.10.510.10 (GENE3D); G3DSA:3.30.200.20 (GENE3D); PTHR24054 (PANTHER); PTHR24054:SF28 (PANTHER); IPR008271 (PROSITE_PATTERNS); IPR017441 (PROSITE_PATTERNS); CYTOPLASMIC_DOMAIN (PHOBIUS); NON_CYTOPLASMIC_DOMAIN (PHOBIUS); NON_CYTOPLASMIC_DOMAIN (PHOBIUS); TRANSMEMBRANE (PHOBIUS); TRANSMEMBRANE (PHOBIUS); CYTOPLASMIC_DOMAIN (PHOBIUS); NON_CYTOPLASMIC_DOMAIN (PHOBIUS); TRANSMEMBRANE (PHOBIUS); TRANSMEMBRANE (PHOBIUS); CYTOPLASMIC_DOMAIN (PHOBIUS); IPR000719 (PROSITE_PROFILES); IPR011009 (SUPERFAMILY); TMhelix (TMHMM); TMhelix (TMHMM); TMhelix (TMHMM); TMhelix (TMHMM) |
| 1132 | c28873_g1_i1_len_1405_path_1_0_536_538_537_537_539_538_660_662_661_822_824_823_102_2_1173_1023_1286_1  | 117 | epidermal retinol dehydrogenase 2       | 468 | 4.31E-110 | 71.00% | 0.115 | IPR002198 (PRINTS); IPR002347 (PRINTS); IPR002198 (PFAM); IPR016040 (G3DSA:3.40.50.GENE3D); PTHR24316:SF289 (PANTHER); PTHR24316 (PANTHER); CYTOPLASMIC_DOMAIN (PHOBIUS); NON_CYTOPLASMIC_DOMAIN (PHOBIUS); TRANSMEMBRANE (PHOBIUS); TRANSMEMBRANE (PHOBIUS); NON_CYTOPLASMIC_DOMAIN (PHOBIUS); CYTOPLASMIC_DOMAIN (PHOBIUS); TRANSMEMBRANE (PHOBIUS); SSF51735 (SUPERFAMILY); TMhelix (TMHMM)                                                                                                                                                                                                                                        |

|      |                                                                                                       |      |                                                      |     |           |        |       |                                                                                                                                                                                                                                                                                                                                                                                                                                                                      |
|------|-------------------------------------------------------------------------------------------------------|------|------------------------------------------------------|-----|-----------|--------|-------|----------------------------------------------------------------------------------------------------------------------------------------------------------------------------------------------------------------------------------------------------------------------------------------------------------------------------------------------------------------------------------------------------------------------------------------------------------------------|
| 1133 | c28873_g1_i3_len_1392_path_1_0_536_538_537_537_539_538_660_824_661_860_1024_861_1009_1173_1010_1273_1 | 99   | epidermal retinol dehydrogenase 2-like               | 464 | 1.36E-68  | 56.80% | 0.115 | Coil (COILS); IPR002347 (PRINTS); IPR002198 (PFAM); IPR016040 (G3DSA:3.40.50.GENE3D); PTHR24316:SF289 (PANTHER); PTHR24316 (PANTHER); CYTOPLASMIC_DOMAIN (PHOBIUS); CYTOPLASMIC_DOMAIN (PHOBIUS); TRANSMEMBRANE (PHOBIUS); TRANSMEMBRANE (PHOBIUS); TRANSMEMBRANE (PHOBIUS); NON_CYTOPLASMIC_DOMAIN (PHOBIUS); NON_CYTOPLASMIC_DOMAIN (PHOBIUS); TRANSMEMBRANE (PHOBIUS); NON_CYTOPLASMIC_DOMAIN (PHOBIUS); SSF51735 (SUPERFAMILY); TMhelix (TMHMM); TMhelix (TMHMM) |
| 1134 | c28873_g1_i4_len_1554_path_1_0_536_538_537_537_539_538_660_824_661_822_824_823_1022_1024_1023_1171_1  | 187  | epidermal retinol dehydrogenase 2-like isoform x2    | 518 | 1.48E-111 | 71.70% | 0.115 | Coil (COILS); IPR002347 (PRINTS); IPR002198 (PRINTS); IPR016040 (G3DSA:3.40.50.GENE3D); IPR002198 (PFAM); PTHR24316 (PANTHER); PTHR24316:SF289 (PANTHER); NON_CYTOPLASMIC_DOMAIN (PHOBIUS); NON_CYTOPLASMIC_DOMAIN (PHOBIUS); TRANSMEMBRANE (PHOBIUS); CYTOPLASMIC_DOMAIN (PHOBIUS); TRANSMEMBRANE (PHOBIUS); TRANSMEMBRANE (PHOBIUS); TRANSMEMBRANE (PHOBIUS); CYTOPLASMIC_DOMAIN (PHOBIUS); SSF51735 (SUPERFAMILY); TMhelix (TMHMM); TMhelix (TMHMM)               |
| 1135 | c28874_g1_i1_len_1715_path_422_0_4_228_5_26_447_27_1033_1454_1034_1714_3                              | 245  | transitional endoplasmic reticulum atpase ter94      | 561 | 0         | 93.10% | 0.098 | IPR003593 (SMART); G3DSA:1.10.8.60 (GENE3D); IPR027417 (G3DSA:3.40.50.GENE3D); IPR003959 (PFAM); IPR015415 (PFAM); PTHR23077:SF69 (PANTHER); PTHR23077 (PANTHER); IPR003960 (PROSITE_PATTERNS); IPR027417 (SUPERFAMILY)                                                                                                                                                                                                                                              |
| 1136 | c28885_g1_i1_len_1843_path_1495_0_663_2159_664_859_2354_860_1298_26_1299_1392_2886_1393_1398_2908_1_4 | 145  | otogelin-like protein                                | 609 | 1.50E-12  | 45.30% | 0.098 | no IPS match                                                                                                                                                                                                                                                                                                                                                                                                                                                         |
| 1137 | c28885_g1_i2_len_1405_path_1495_0_663_2159_664_859_25_860_860_26_861_954_2886_955_960_2908_961_1061_4 | 61   | otogelin-like protein                                | 463 | 7.97E-09  | 45.30% | 0.098 | no IPS match                                                                                                                                                                                                                                                                                                                                                                                                                                                         |
| 1138 | c28885_g1_i3_len_1200_path_3009_0_20_2159_21_216_2354_217_655_26_656_749_2886_750_755_2908_756_856_4  | 69   | otogelin-like protein                                | 400 | 5.29E-10  | 47.10% | 0.098 | no IPS match                                                                                                                                                                                                                                                                                                                                                                                                                                                         |
| 1139 | c28885_g2_i1_len_1776_path_3051_0_935_77_936_1775_4                                                   | 99   | otogelin-like protein                                | 586 | 7.85E-11  | 43.50% | 0.103 | no IPS match                                                                                                                                                                                                                                                                                                                                                                                                                                                         |
| 1140 | c28885_g2_i1_len_1776_path_3051_0_935_77_936_1775_5                                                   | 99   | otogelin-like protein                                | 586 | 3.07E-10  | 41.80% | 0.117 | PD968187 (PRODOM)                                                                                                                                                                                                                                                                                                                                                                                                                                                    |
| 1141 | c28909_g1_i1_len_1948_path_2445_0_1726_732_4_1727_1728_7326_1729_1747_4189_1748_1802_4244_1803_1877_4 | 1321 | inactive hydroxysteroid dehydrogenase-like protein 1 | 649 | 6.60E-107 | 68.20% | 0.298 | Coil (COILS); IPR002347 (PRINTS); IPR002198 (PRINTS); IPR016040 (G3DSA:3.40.50.GENE3D); IPR002198 (PFAM); PTHR24316:SF317 (PANTHER); PTHR24316 (PANTHER); IPR020904 (PROSITE_PATTERNS); TRANSMEMBRANE (PHOBIUS); CYTOPLASMIC_DOMAIN (PHOBIUS); CYTOPLASMIC_DOMAIN (PHOBIUS); TRANSMEMBRANE (PHOBIUS); TRANSMEMBRANE (PHOBIUS); NON_CYTOPLASMIC_DOMAIN (PHOBIUS); NON_CYTOPLASMIC_DOMAIN (PHOBIUS); SSF51735 (SUPERFAMILY)                                            |
| 1142 | c28910_g1_i1_len_1750_path_399_0_239_636_240_1292_1682_1293_1316_398_1317_1405_22_1406_1749_0         | 2299 | bola-like protein 2-like                             | 574 | 1.24E-33  | 83.10% | 0.164 | IPR002634 (G3DSA:3.30.300.GENE3D); IPR002634 (PFAM); PTHR12735 (PANTHER); PTHR12735:SF2 (PANTHER); CYTOPLASMIC_DOMAIN (PHOBIUS); TRANSMEMBRANE (PHOBIUS); NON_CYTOPLASMIC_DOMAIN (PHOBIUS); TRANSMEMBRANE (PHOBIUS); TRANSMEMBRANE (PHOBIUS); CYTOPLASMIC_DOMAIN (PHOBIUS); NON_CYTOPLASMIC_DOMAIN (PHOBIUS); IPR002634 (SUPERFAMILY); TMhelix (TMHMM); TMhelix (TMHMM)                                                                                              |
| 1143 | c28930_g3_i2_len_451_path_5821_0_95_7970_96_96_7971_97_116_5362_117_450_4                             | 1    | isocitrate lyase family partial                      | 150 | 1.98E-67  | 99.90% | 0.175 | IPR006254 (PFAM); IPR015813 (G3DSA:3.20.20.GENE3D); PTHR21631 (PANTHER); PTHR21631:SF10 (PANTHER); IPR015813 (SUPERFAMILY)                                                                                                                                                                                                                                                                                                                                           |
| 1144 | c28938_g3_i1_len_1918_path_6801_0_15_6748_16_112_1180_113_620_3162_621_727_64_728_796_2494_797_1917_1 | 4059 | gamma-glutamyl hydrolase                             | 633 | 2.10E-92  | 66.30% | 0.105 | IPR029062 (G3DSA:3.40.50.GENE3D); IPR011697 (PFAM); IPR015527 (PANTHER); NON_CYTOPLASMIC_DOMAIN (PHOBIUS); TRANSMEMBRANE (PHOBIUS); NON_CYTOPLASMIC_DOMAIN (PHOBIUS); CYTOPLASMIC_DOMAIN (PHOBIUS); TRANSMEMBRANE (PHOBIUS); IPR015527 (PROSITE_PROFILES); IPR029062 (SUPERFAMILY); TMhelix (TMHMM); TMhelix (TMHMM)                                                                                                                                                 |

|      |                                                                                                        |      |                               |     |           |        |         |                                                                                                                                                                                                                                                                                                                                                                                                                                                                                                                                                                                                                                                                                                                                                                    |
|------|--------------------------------------------------------------------------------------------------------|------|-------------------------------|-----|-----------|--------|---------|--------------------------------------------------------------------------------------------------------------------------------------------------------------------------------------------------------------------------------------------------------------------------------------------------------------------------------------------------------------------------------------------------------------------------------------------------------------------------------------------------------------------------------------------------------------------------------------------------------------------------------------------------------------------------------------------------------------------------------------------------------------------|
| 1145 | c28938_g3_i2_len_1811_path_6801_0_15_6748_1810_1                                                       | 2599 | gamma-glutamyl hydrolase-like | 597 | 2.86E-45  | 70.00% | 0.105   | IPR011697 (PFAM); IPR029062 (G3DSA:3.40.50.GENE3D); PTHR11315:SF2 (PANTHER); IPR015527 (PANTHER); NON_CYTOPLASMIC_DOMAIN (PHOBIUS); CYTOPLASMIC_DOMAIN (PHOBIUS); TRANSMEMBRANE (PHOBIUS); TRANSMEMBRANE (PHOBIUS); CYTOPLASMIC_DOMAIN (PHOBIUS); TRANSMEMBRANE (PHOBIUS); CYTOPLASMIC_DOMAIN (PHOBIUS); TRANSMEMBRANE (PHOBIUS); NON_CYTOPLASMIC_DOMAIN (PHOBIUS); TRANSMEMBRANE (PHOBIUS); NON_CYTOPLASMIC_DOMAIN (PHOBIUS); IPR015527 (PROSITE_PROFILES); IPR029062 (SUPERFAMILY); TMhelix (TMHMM); TMhelix (TMHMM); TMhelix (TMHMM); TMhelix (TMHMM);                                                                                                                                                                                                          |
| 1146 | c28938_g3_i2_len_1811_path_6801_0_15_6748_1810_2                                                       | 2599 | gamma-glutamyl hydrolase-like | 597 | 1.29E-29  | 67.70% | 0.154   | IPR029062 (G3DSA:3.40.50.GENE3D); IPR015527 (PANTHER); CYTOPLASMIC_DOMAIN (PHOBIUS); TRANSMEMBRANE (PHOBIUS); NON_CYTOPLASMIC_DOMAIN (PHOBIUS); IPR015527 (PROSITE_PROFILES); IPR029062 (SUPERFAMILY); TMhelix (TMHMM)                                                                                                                                                                                                                                                                                                                                                                                                                                                                                                                                             |
| 1147 | c28938_g3_i3_len_2071_path_6579_0_168_6748_169_265_1180_266_773_3162_774_880_64_88_1_949_2494_950_20_1 | 4069 | gamma-glutamyl hydrolase      | 684 | 6.28E-92  | 66.30% | 0.132   | IPR029062 (G3DSA:3.40.50.GENE3D); IPR011697 (PFAM); IPR015527 (PANTHER); CYTOPLASMIC_DOMAIN (PHOBIUS); TRANSMEMBRANE (PHOBIUS); NON_CYTOPLASMIC_DOMAIN (PHOBIUS); CYTOPLASMIC_DOMAIN (PHOBIUS); TRANSMEMBRANE (PHOBIUS); IPR015527 (PROSITE_PROFILES); IPR029062 (SUPERFAMILY); TMhelix (TMHMM); TMhelix (TMHMM)                                                                                                                                                                                                                                                                                                                                                                                                                                                   |
| 1148 | c28938_g4_i1_len_446_path_7474_0_46_2096_4_7_445_1                                                     | 28   | gamma-glutamyl hydrolase      | 149 | 1.63E-38  | 65.90% | 0.29    | IPR011697 (PFAM); IPR029062 (G3DSA:3.40.50.GENE3D); IPR015527 (PANTHER); CYTOPLASMIC_DOMAIN (PHOBIUS); TRANSMEMBRANE (PHOBIUS); NON_CYTOPLASMIC_DOMAIN (PHOBIUS); TRANSMEMBRANE (PHOBIUS); CYTOPLASMIC_DOMAIN (PHOBIUS); IPR015527 (PROSITE_PROFILES); IPR029062 (SUPERFAMILY); TMhelix (TMHMM); TMhelix (TMHMM)                                                                                                                                                                                                                                                                                                                                                                                                                                                   |
| 1149 | c28939_g2_i1_len_1533_path_4126_0_124_859_125_1532_0                                                   | 158  | gtp-binding protein sar1b     | 511 | 2.05E-68  | 93.10% | 0.788 Y | IPR006689 (PRINTS); IPR006687 (SMART); IPR006689 (PFAM); IPR027417 (G3DSA:3.40.50.GENE3D); PTHR11711 (PANTHER); PTHR11711:SF107 (PANTHER); TRANSMEMBRANE (PHOBIUS); SIGNAL_PEPTIDE_H_REGION (PHOBIUS); NON_CYTOPLASMIC_DOMAIN (PHOBIUS); TRANSMEMBRANE (PHOBIUS); SIGNAL_PEPTIDE_N_REGION (PHOBIUS); NON_CYTOPLASMIC_DOMAIN (PHOBIUS); TRANSMEMBRANE (PHOBIUS); SIGNAL_PEPTIDE (PHOBIUS); TRANSMEMBRANE (PHOBIUS); CYTOPLASMIC_DOMAIN (PHOBIUS); SIGNAL_PEPTIDE_C_REGION (PHOBIUS); CYTOPLASMIC_DOMAIN (PHOBIUS); NON_CYTOPLASMIC_DOMAIN (PHOBIUS); IPR006687 (PROSITE_PROFILES); SignalP-TM (SIGNALP_GRAM_POSITIVE); SignalP-noTM (SIGNALP_EUK); SignalP-noTM (SIGNALP_GRAM_NEGATIVE); IPR027417 (SUPERFAMILY); TMhelix (TMHMM); TMhelix (TMHMM); TMhelix (TMHMM) |
| 1150 | c28939_g2_i2_len_1917_path_1_0_248_250_249_508_859_509_1916_0                                          | 202  | gtp-binding protein sar1      | 639 | 3.92E-123 | 93.90% | 0.249   | IPR006689 (PRINTS); IPR006687 (SMART); IPR024156 (SMART); IPR005225 (TIGRFAM); IPR006689 (PFAM); IPR027417 (G3DSA:3.40.50.GENE3D); PTHR11711:SF133 (PANTHER); PTHR11711 (PANTHER); NON_CYTOPLASMIC_DOMAIN (PHOBIUS); TRANSMEMBRANE (PHOBIUS); CYTOPLASMIC_DOMAIN (PHOBIUS); TRANSMEMBRANE (PHOBIUS); TRANSMEMBRANE (PHOBIUS); CYTOPLASMIC_DOMAIN (PHOBIUS); NON_CYTOPLASMIC_DOMAIN (PHOBIUS); CYTOPLASMIC_DOMAIN (PHOBIUS); IPR006687 (PROSITE_PROFILES); IPR027417 (SUPERFAMILY); TMhelix (TMHMM); TMhelix (TMHMM); TMhelix (TMHMM)                                                                                                                                                                                                                               |
| 1151 | c28939_g2_i3_len_1715_path_553_0_46_250_47_306_859_307_1714_2                                          | 204  | gtp-binding protein sar1      | 571 | 1.60E-123 | 93.20% | 0.113   | IPR006689 (PRINTS); IPR006687 (SMART); IPR024156 (SMART); IPR006689 (PFAM); IPR027417 (G3DSA:3.40.50.GENE3D); IPR005225 (TIGRFAM); PTHR11711:SF133 (PANTHER); PTHR11711 (PANTHER); CYTOPLASMIC_DOMAIN (PHOBIUS); TRANSMEMBRANE (PHOBIUS); NON_CYTOPLASMIC_DOMAIN (PHOBIUS); CYTOPLASMIC_DOMAIN (PHOBIUS); TRANSMEMBRANE (PHOBIUS); NON_CYTOPLASMIC_DOMAIN (PHOBIUS); TRANSMEMBRANE (PHOBIUS); IPR006687 (PROSITE_PROFILES); IPR027417 (SUPERFAMILY); TMhelix (TMHMM); TMhelix (TMHMM); TMhelix (TMHMM)                                                                                                                                                                                                                                                             |

|      |                                                                                                        |       |                                                     |      |           |        |       |                                                                                                                                                                                                                                                                                                                                                                                                                                                                                                                                                                                                                                                                                                                                                               |
|------|--------------------------------------------------------------------------------------------------------|-------|-----------------------------------------------------|------|-----------|--------|-------|---------------------------------------------------------------------------------------------------------------------------------------------------------------------------------------------------------------------------------------------------------------------------------------------------------------------------------------------------------------------------------------------------------------------------------------------------------------------------------------------------------------------------------------------------------------------------------------------------------------------------------------------------------------------------------------------------------------------------------------------------------------|
| 1152 | c28940_g1_i1_len_3541_path_8022_0_1796_70_1797_1797_2492_1798_1821_15224_1822_1832_15245_1833_1839_4   | 159   | arginine abc periplasmic arginine-binding protein   | 1180 | 0         | 99.40% | 0.123 | IPR001320 (SMART); IPR001638 (SMART); IPR005768 (TIGRFAM); IPR021909 (PFAM); G3DSA:3.40.190.10 (GENE3D); G3DSA:3.40.190.10 (GENE3D); PF00497 (PFAM); PTHR18966 (PANTHER); PTHR18966:SF152 (PANTHER); IPR018313 (PROSITE_PATTERNS); TRANSMEMBRANE (PHOBIUS); CYTOPLASMIC_DOMAIN (PHOBIUS); TRANSMEMBRANE (PHOBIUS); TRANSMEMBRANE (PHOBIUS); CYTOPLASMIC_DOMAIN (PHOBIUS); NON_CYTOPLASMIC_DOMAIN (PHOBIUS); NON_CYTOPLASMIC_DOMAIN (PHOBIUS); SSF53850 (SUPERFAMILY)                                                                                                                                                                                                                                                                                          |
| 1153 | c28947_g1_i1_len_2374_path_2619_0_1943_455_8_1944_2373_1                                               | 836   | zinc metalloproteinase nas-13-like isoform 1        | 791  | 6.68E-133 | 54.80% | 0.291 | IPR001506 (PRINTS); IPR003582 (SMART); IPR006026 (SMART); IPR024079 (G3DSA:3.40.390.GENE3D); IPR001506 (PFAM); IPR003582 (PFAM); PTHR10127 (PANTHER); PTHR10127:SF550 (PANTHER); CYTOPLASMIC_DOMAIN (PHOBIUS); NON_CYTOPLASMIC_DOMAIN (PHOBIUS); TRANSMEMBRANE (PHOBIUS); TRANSMEMBRANE (PHOBIUS); TRANSMEMBRANE (PHOBIUS); NON_CYTOPLASMIC_DOMAIN (PHOBIUS); TRANSMEMBRANE (PHOBIUS); CYTOPLASMIC_DOMAIN (PHOBIUS); CYTOPLASMIC_DOMAIN (PHOBIUS); NON_CYTOPLASMIC_DOMAIN (PHOBIUS); TRANSMEMBRANE (PHOBIUS); NON_CYTOPLASMIC_DOMAIN (PHOBIUS); TRANSMEMBRANE (PHOBIUS); IPR003582 (PROSITE_PROFILES); IPR003582 (PROSITE_PROFILES); IPR003582 (PROSITE_PROFILES); SSF55486 (SUPERFAMILY); TMhelix (TMHMM); TMhelix (TMHMM); TMhelix (TMHMM); TMhelix (TMHMM) |
| 1154 | c28955_g1_i1_len_2783_path_351_0_2782_0                                                                | 13171 | intestinal mucin-like                               | 921  | 1.48E-21  | 41.00% | 0.1   | IPR006207 (SMART); IPR001007 (SMART); IPR001007 (PFAM); IPR001007 (PROSITE_PATTERNS); TRANSMEMBRANE (PHOBIUS); NON_CYTOPLASMIC_DOMAIN (PHOBIUS); NON_CYTOPLASMIC_DOMAIN (PHOBIUS); TRANSMEMBRANE (PHOBIUS); CYTOPLASMIC_DOMAIN (PHOBIUS); IPR006207 (PROSITE_PROFILES); IPR001007 (PROSITE_PROFILES)                                                                                                                                                                                                                                                                                                                                                                                                                                                          |
| 1155 | c28981_g1_i1_len_1961_path_2088_0_1235_78_1236_1960_3                                                  | 403   | thioredoxin-like protein 1 isoform x1               | 654  | 1.01E-149 | 81.20% | 0.143 | PR00421 (PRINTS); IPR012336 (G3DSA:3.40.30.GENE3D); IPR010400 (G3DSA:2.60.120.GENE3D); IPR010400 (PFAM); IPR013766 (PFAM); IPR005746 (PANTHER); IPR017937 (PROSITE_PATTERNS); TRANSMEMBRANE (PHOBIUS); CYTOPLASMIC_DOMAIN (PHOBIUS); NON_CYTOPLASMIC_DOMAIN (PHOBIUS); IPR012336 (PROSITE_PROFILES); IPR010400 (PROSITE_PROFILES); IPR008979 (SUPERFAMILY); IPR012336 (SUPERFAMILY)                                                                                                                                                                                                                                                                                                                                                                           |
| 1156 | c28985_g1_i1_len_656_path_776_0_366_1143_3_67_407_1184_408_438_1215_439_655_5                          | 21    | zinc finger protein 658-like                        | 218  | 2.11E-14  | 62.90% | 0.113 | IPR015880 (SMART); PF13465 (PFAM); IPR013087 (G3DSA:3.30.160.GENE3D); IPR013087 (G3DSA:3.30.160.GENE3D); PF13894 (PFAM); PTHR24409:SF13 (PANTHER); PTHR24409 (PANTHER); IPR007087 (PROSITE_PATTERNS); IPR007087 (PROSITE_PATTERNS); IPR007087 (PROSITE_PATTERNS); TRANSMEMBRANE (PHOBIUS); CYTOPLASMIC_DOMAIN (PHOBIUS); TRANSMEMBRANE (PHOBIUS); CYTOPLASMIC_DOMAIN (PHOBIUS); NON_CYTOPLASMIC_DOMAIN (PHOBIUS); IPR007087 (PROSITE_PROFILES); IPR007087 (PROSITE_PROFILES); SSF57667 (SUPERFAMILY); SSF57667 (SUPERFAMILY); TMhelix (TMHMM); TMhelix (TMHMM)                                                                                                                                                                                                |
| 1157 | c28985_g2_i1_len_1287_path_2865_0_629_3495_630_645_3511_646_1085_4875_1086_1207_40_69_1208_1238_4100_0 | 71    | zinc finger protein 570-like                        | 429  | 2.03E-28  | 57.80% | 0.16  | IPR015880 (SMART); IPR007087 (PFAM); IPR013087 (G3DSA:3.30.160.GENE3D); IPR013087 (G3DSA:3.30.160.GENE3D); PF13465 (PFAM); PTHR24409 (PANTHER); PTHR24409:SF13 (PANTHER); IPR007087 (PROSITE_PATTERNS); IPR007087 (PROSITE_PATTERNS); IPR007087 (PROSITE_PATTERNS); IPR007087 (PROSITE_PATTERNS); IPR007087 (PROSITE_PATTERNS); IPR007087 (PROSITE_PROFILES); IPR007087 (PROSITE_PROFILES); IPR007087 (PROSITE_PROFILES); IPR007087 (PROSITE_PROFILES); SSF57667 (SUPERFAMILY); SSF57667 (SUPERFAMILY); SSF57667 (SUPERFAMILY)                                                                                                                                                                                                                                |
| 1158 | c2899_g1_i1_len_1178_path_2215_0_193_26_19_4_1177_0                                                    | 20    | thioredoxin-related transmembrane protein 2 homolog | 393  | 1.03E-111 | 78.90% | 0.106 | IPR013766 (PFAM); IPR012336 (G3DSA:3.40.30.GENE3D); PTHR15853 (PANTHER); NON_CYTOPLASMIC_DOMAIN (PHOBIUS); TRANSMEMBRANE (PHOBIUS); CYTOPLASMIC_DOMAIN (PHOBIUS); TRANSMEMBRANE (PHOBIUS); NON_CYTOPLASMIC_DOMAIN (PHOBIUS); CYTOPLASMIC_DOMAIN (PHOBIUS); CYTOPLASMIC_DOMAIN (PHOBIUS); TRANSMEMBRANE (PHOBIUS); IPR012336 (PROSITE_PROFILES); IPR012336 (SUPERFAMILY); TMhelix (TMHMM)                                                                                                                                                                                                                                                                                                                                                                      |

|      |                                                                                                         |       |                                         |     |           |        |         |                                                                                                                                                                                                                                                                                                                                                                                                                                                                                                                                                                                                                                                                             |
|------|---------------------------------------------------------------------------------------------------------|-------|-----------------------------------------|-----|-----------|--------|---------|-----------------------------------------------------------------------------------------------------------------------------------------------------------------------------------------------------------------------------------------------------------------------------------------------------------------------------------------------------------------------------------------------------------------------------------------------------------------------------------------------------------------------------------------------------------------------------------------------------------------------------------------------------------------------------|
| 1159 | c29002_g1_i1_len_563_path_180_0_19_200_20_562_2                                                         | 39    | low quality protein: otogelin           | 187 | 3.12E-07  | 44.50% | 0.102   | no IPS match                                                                                                                                                                                                                                                                                                                                                                                                                                                                                                                                                                                                                                                                |
| 1160 | c29002_g1_i2_len_1531_path_3853_0_987_200_988_1530_1                                                    | 132   | otogelin-like protein                   | 510 | 1.08E-12  | 45.20% | 0.102   | no IPS match                                                                                                                                                                                                                                                                                                                                                                                                                                                                                                                                                                                                                                                                |
| 1161 | c29002_g2_i2_len_1636_path_2977_0_749_1346_750_1635_4                                                   | 255   | low quality protein: otogelin           | 545 | 1.24E-13  | 47.00% | 0.102   | PD968187 (PRODOM)                                                                                                                                                                                                                                                                                                                                                                                                                                                                                                                                                                                                                                                           |
| 1162 | c29005_g1_i1_len_1291_path_53_0_297_351_29_8_537_5294_538_1290_1                                        | 47    | partial                                 | 426 | 3.52E-38  | 90.70% | 0.256   | IPR024156 (SMART); IPR006689 (PFAM); IPR027417 (G3DSA:3.40.50.GENE3D); PTHR11711 (PANTHER); PTHR11711:SF146 (PANTHER); TRANSMEMBRANE (PHOBIUS); NON_CYTOPLASMIC_DOMAIN (PHOBIUS); CYTOPLASMIC_DOMAIN (PHOBIUS); IPR024156 (PROSITE_PROFILES); IPR027417 (SUPERFAMILY)                                                                                                                                                                                                                                                                                                                                                                                                       |
| 1163 | c29005_g2_i1_len_2241_path_3014_0_559_351_560_799_3813_800_1641_4652_1642_1642_804_1643_2240_1          | 191   | adp-ribosylation factor-like protein 5b | 747 | 1.54E-106 | 94.30% | 0.344 Y | IPR006689 (PRINTS); IPR024156 (SMART); IPR006687 (SMART); IPR006689 (PFAM); IPR005225 (TIGRFAM); IPR027417 (G3DSA:3.40.50.GENE3D); PTHR11711 (PANTHER); PTHR11711:SF146 (PANTHER); TRANSMEMBRANE (PHOBIUS); CYTOPLASMIC_DOMAIN (PHOBIUS); CYTOPLASMIC_DOMAIN (PHOBIUS); TRANSMEMBRANE (PHOBIUS); NON_CYTOPLASMIC_DOMAIN (PHOBIUS); TRANSMEMBRANE (PHOBIUS); NON_CYTOPLASMIC_DOMAIN (PHOBIUS); IPR024156 (PROSITE_PROFILES); IPR027417 (SUPERFAMILY); TMhelix (TMHMM); TMhelix (TMHMM); TMhelix (TMHMM)                                                                                                                                                                      |
| 1164 | c29011_g1_i1_len_556_path_808_0_52_861_53_411_1691_412_412_1692_413_437_1331_438_4_60_1692_461_485_1_5  | 41348 | chondroitin proteoglycan partial        | 176 | 2.94E-14  | 57.40% | 0.101   | IPR002557 (SMART); IPR002557 (G3DSA:2.170.140.GENE3D); IPR002557 (PFAM); PTHR23301 (PANTHER); IPR002557 (PROSITE_PROFILES); IPR002557 (SUPERFAMILY)                                                                                                                                                                                                                                                                                                                                                                                                                                                                                                                         |
| 1165 | c29043_g1_i1_len_1867_path_1393_0_26_1258_27_1100_2492_1101_1640_10912_1641_1866_2                      | 511   | cyclin-g-associated kinase-like         | 622 | 2.27E-152 | 78.10% | 0.153   | IPR002290 (SMART); G3DSA:1.10.510.10 (GENE3D); G3DSA:3.30.200.20 (GENE3D); IPR000719 (PFAM); PTHR23172 (PANTHER); PTHR23172:SF19 (PANTHER); IPR008271 (PROSITE_PATTERNS); TRANSMEMBRANE (PHOBIUS); TRANSMEMBRANE (PHOBIUS); NON_CYTOPLASMIC_DOMAIN (PHOBIUS); CYTOPLASMIC_DOMAIN (PHOBIUS); CYTOPLASMIC_DOMAIN (PHOBIUS); TRANSMEMBRANE (PHOBIUS); NON_CYTOPLASMIC_DOMAIN (PHOBIUS); TRANSMEMBRANE (PHOBIUS); NON_CYTOPLASMIC_DOMAIN (PHOBIUS); TRANSMEMBRANE (PHOBIUS); IPR000719 (PROSITE_PROFILES); IPR011009 (SUPERFAMILY); TMhelix (TMHMM); TMhelix (TMHMM); TMhelix (TMHMM)                                                                                           |
| 1166 | c29043_g1_i2_len_1661_path_1393_0_26_1258_27_1100_10236_1101_1660_2                                     | 250   | cyclin-g-associated kinase-like         | 553 | 2.67E-152 | 78.40% | 0.153   | IPR002290 (SMART); G3DSA:1.10.510.10 (GENE3D); IPR000719 (PFAM); G3DSA:3.30.200.20 (GENE3D); PTHR23172 (PANTHER); PTHR23172:SF19 (PANTHER); IPR008271 (PROSITE_PATTERNS); TRANSMEMBRANE (PHOBIUS); NON_CYTOPLASMIC_DOMAIN (PHOBIUS); CYTOPLASMIC_DOMAIN (PHOBIUS); IPR000719 (PROSITE_PROFILES); IPR011009 (SUPERFAMILY)                                                                                                                                                                                                                                                                                                                                                    |
| 1167 | c29043_g2_i1_len_2810_path_2690_0_2809_3                                                                | 113   | aldehyde mitochondrial                  | 937 | 0         | 85.50% | 0.163   | IPR015590 (PFAM); IPR016163 (G3DSA:3.40.309.GENE3D); IPR016162 (G3DSA:3.40.605.GENE3D); PTHR11699:SF151 (PANTHER); PTHR11699 (PANTHER); IPR029510 (PROSITE_PATTERNS); IPR016160 (PROSITE_PATTERNS); NON_CYTOPLASMIC_DOMAIN (PHOBIUS); CYTOPLASMIC_DOMAIN (PHOBIUS); TRANSMEMBRANE (PHOBIUS); TRANSMEMBRANE (PHOBIUS); CYTOPLASMIC_DOMAIN (PHOBIUS); CYTOPLASMIC_DOMAIN (PHOBIUS); NON_CYTOPLASMIC_DOMAIN (PHOBIUS); NON_CYTOPLASMIC_DOMAIN (PHOBIUS); TRANSMEMBRANE (PHOBIUS); TRANSMEMBRANE (PHOBIUS); NON_CYTOPLASMIC_DOMAIN (PHOBIUS); CYTOPLASMIC_DOMAIN (PHOBIUS); TRANSMEMBRANE (PHOBIUS); IPR016161 (SUPERFAMILY); TMhelix (TMHMM); TMhelix (TMHMM); TMhelix (TMHMM) |
| 1168 | c29074_g1_i1_len_2322_path_1_0_262_5014_26_3_263_5015_264_274_276_275_275_277_276_7_07_709_708_708_71_5 | 298   | laccase isoform d                       | 761 | 0         | 61.90% | 0.121   | IPR001117 (PFAM); IPR008972 (G3DSA:2.60.40.GENE3D); IPR008972 (G3DSA:2.60.40.GENE3D); IPR008972 (G3DSA:2.60.40.GENE3D); IPR011706 (PFAM); IPR011707 (PFAM); PTHR11709 (PANTHER); PTHR11709:SF33 (PANTHER); IPR002355 (PROSITE_PATTERNS); CYTOPLASMIC_DOMAIN (PHOBIUS); TRANSMEMBRANE (PHOBIUS); TRANSMEMBRANE (PHOBIUS); NON_CYTOPLASMIC_DOMAIN (PHOBIUS); CYTOPLASMIC_DOMAIN (PHOBIUS); NON_CYTOPLASMIC_DOMAIN (PHOBIUS); TRANSMEMBRANE (PHOBIUS); IPR008972 (SUPERFAMILY); IPR008972 (SUPERFAMILY); IPR008972 (SUPERFAMILY)                                                                                                                                               |



|      |                                                                                                         |        |                                    |     |           |        |         |                                                                                                                                                                                                                                                                                                                                                                                                                                                                                                                                                                                                                                                                     |
|------|---------------------------------------------------------------------------------------------------------|--------|------------------------------------|-----|-----------|--------|---------|---------------------------------------------------------------------------------------------------------------------------------------------------------------------------------------------------------------------------------------------------------------------------------------------------------------------------------------------------------------------------------------------------------------------------------------------------------------------------------------------------------------------------------------------------------------------------------------------------------------------------------------------------------------------|
| 1169 | c29090_g1_i1_len_2238_path_77_0_1551_62_15_52_1563_74_1564_1667_1743_1668_1671_1747_1672_2237_2         | 140303 | transmembrane protease serine 4    | 739 | 6.90E-40  | 53.10% | 0.396 Y | IPR001314 (PRINTS); IPR001254 (SMART); G3DSA:2.40.10.10 (GENE3D); IPR001254 (PFAM); G3DSA:2.40.10.10 (GENE3D); G3DSA:2.40.10.10 (GENE3D); PTHR24260 (PANTHER); IPR018114 (PROSITE_PATTERNS); IPR018114 (PROSITE_PATTERNS); NON_CYTOPLASMIC_DOMAIN (PHOBIUS); TRANSMEMBRANE (PHOBIUS); TRANSMEMBRANE (PHOBIUS); CYTOPLASMIC_DOMAIN (PHOBIUS); CYTOPLASMIC_DOMAIN (PHOBIUS); TRANSMEMBRANE (PHOBIUS); NON_CYTOPLASMIC_DOMAIN (PHOBIUS); NON_CYTOPLASMIC_DOMAIN (PHOBIUS); CYTOPLASMIC_DOMAIN (PHOBIUS); TRANSMEMBRANE (PHOBIUS); TRANSMEMBRANE (PHOBIUS); IPR001254 (PROSITE_PROFILES); IPR009003 (SUPERFAMILY)                                                       |
| 1170 | c29091_g1_i1_len_1102_path_1_0_243_2276_24_4_497_499_498_566_3516_567_761_763_762_7_98_800_799_1101_1   | 75244  | transmembrane serine protease      | 367 | 4.88E-45  | 54.20% | 0.677 Y | IPR001314 (PRINTS); IPR001254 (SMART); G3DSA:2.40.10.10 (GENE3D); G3DSA:2.40.10.10 (GENE3D); IPR001254 (PFAM); G3DSA:2.40.10.10 (GENE3D); PTHR24268 (PANTHER); IPR018114 (PROSITE_PATTERNS); IPR018114 (PROSITE_PATTERNS); NON_CYTOPLASMIC_DOMAIN (PHOBIUS); SIGNAL_PEPTIDE_N_REGION (PHOBIUS); SIGNAL_PEPTIDE_H_REGION (PHOBIUS); SIGNAL_PEPTIDE_C_REGION (PHOBIUS); SIGNAL_PEPTIDE (PHOBIUS); IPR001254 (PROSITE_PROFILES); SignalP-noTM (SIGNALP_EUK); IPR009003 (SUPERFAMILY)                                                                                                                                                                                   |
| 1171 | c29091_g1_i2_len_1100_path_1_0_243_245_244_497_499_498_566_567_593_595_594_677_679_678_761_763_1        | 216342 | isoform a                          | 367 | 3.29E-44  | 53.50% | 0.677 Y | IPR001314 (PRINTS); IPR001254 (SMART); G3DSA:2.40.10.10 (GENE3D); G3DSA:2.40.10.10 (GENE3D); G3DSA:2.40.10.10 (GENE3D); IPR001254 (PFAM); PTHR24268 (PANTHER); IPR018114 (PROSITE_PATTERNS); IPR018114 (PROSITE_PATTERNS); SIGNAL_PEPTIDE_N_REGION (PHOBIUS); SIGNAL_PEPTIDE_H_REGION (PHOBIUS); NON_CYTOPLASMIC_DOMAIN (PHOBIUS); SIGNAL_PEPTIDE_C_REGION (PHOBIUS); SIGNAL_PEPTIDE (PHOBIUS); IPR001254 (PROSITE_PROFILES); SignalP-noTM (SIGNALP_EUK); IPR009003 (SUPERFAMILY)                                                                                                                                                                                   |
| 1172 | c29107_g2_i1_len_2214_path_1_0_1010_8481_1_011_1011_8482_1012_1018_1020_1019_1030_8_501_1031_1034_850_0 | 32715  | plasma kallikrein                  | 732 | 3.11E-41  | 55.20% | 0.152   | IPR001314 (PRINTS); IPR001254 (SMART); G3DSA:2.40.10.10 (GENE3D); IPR001254 (PFAM); G3DSA:2.40.10.10 (GENE3D); PTHR24268 (PANTHER); IPR018114 (PROSITE_PATTERNS); IPR018114 (PROSITE_PATTERNS); CYTOPLASMIC_DOMAIN (PHOBIUS); NON_CYTOPLASMIC_DOMAIN (PHOBIUS); TRANSMEMBRANE (PHOBIUS); TRANSMEMBRANE (PHOBIUS); TRANSMEMBRANE (PHOBIUS); NON_CYTOPLASMIC_DOMAIN (PHOBIUS); CYTOPLASMIC_DOMAIN (PHOBIUS); CYTOPLASMIC_DOMAIN (PHOBIUS); NON_CYTOPLASMIC_DOMAIN (PHOBIUS); TRANSMEMBRANE (PHOBIUS); TRANSMEMBRANE (PHOBIUS); CYTOPLASMIC_DOMAIN (PHOBIUS); IPR001254 (PROSITE_PROFILES); IPR009003 (SUPERFAMILY); TMhelix (TMHMM); TMhelix (TMHMM); TMhelix (TMHMM) |
| 1173 | c29109_g1_i1_len_2327_path_6_0_741_748_742_743_750_744_1451_1458_1452_2326_3                            | 261    | prophenoloxidase activating factor | 770 | 2.27E-125 | 67.70% | 0.117   | IPR001314 (PRINTS); IPR001254 (SMART); IPR001254 (PFAM); G3DSA:2.40.10.10 (GENE3D); G3DSA:2.40.10.10 (GENE3D); PTHR24268 (PANTHER); PTHR24268:SF95 (PANTHER); IPR018114 (PROSITE_PATTERNS); TRANSMEMBRANE (PHOBIUS); CYTOPLASMIC_DOMAIN (PHOBIUS); NON_CYTOPLASMIC_DOMAIN (PHOBIUS); TRANSMEMBRANE (PHOBIUS); NON_CYTOPLASMIC_DOMAIN (PHOBIUS); TRANSMEMBRANE (PHOBIUS); CYTOPLASMIC_DOMAIN (PHOBIUS); IPR001254 (PROSITE_PROFILES); IPR009003 (SUPERFAMILY); TMhelix (TMHMM); TMhelix (TMHMM); TMhelix (TMHMM)                                                                                                                                                     |
| 1174 | c29126_g1_i1_len_1184_path_1687_0_272_261_273_694_2374_695_717_120_718_1183_0                           | 72458  | proclotting enzyme-like            | 388 | 4.27E-50  | 55.20% | 0.546 Y | IPR001314 (PRINTS); IPR001254 (SMART); IPR001254 (PFAM); G3DSA:2.40.10.10 (GENE3D); G3DSA:2.40.10.10 (GENE3D); G3DSA:2.40.10.10 (GENE3D); PTHR24268 (PANTHER); IPR018114 (PROSITE_PATTERNS); IPR018114 (PROSITE_PATTERNS); SIGNAL_PEPTIDE_H_REGION (PHOBIUS); SIGNAL_PEPTIDE (PHOBIUS); SIGNAL_PEPTIDE_C_REGION (PHOBIUS); SIGNAL_PEPTIDE_N_REGION (PHOBIUS); NON_CYTOPLASMIC_DOMAIN (PHOBIUS); IPR001254 (PROSITE_PROFILES); SignalP-TM (SIGNALP_EUK); IPR009003 (SUPERFAMILY)                                                                                                                                                                                     |

|      |                                                                                                               |     |                                                  |     |           |        |       |                                                                                                                                                                                                                                                                                                                                                                                                                                                                                                                                                                                                                                                                                                                                                                                                                                                                                                                                                                                                                                                                            |
|------|---------------------------------------------------------------------------------------------------------------|-----|--------------------------------------------------|-----|-----------|--------|-------|----------------------------------------------------------------------------------------------------------------------------------------------------------------------------------------------------------------------------------------------------------------------------------------------------------------------------------------------------------------------------------------------------------------------------------------------------------------------------------------------------------------------------------------------------------------------------------------------------------------------------------------------------------------------------------------------------------------------------------------------------------------------------------------------------------------------------------------------------------------------------------------------------------------------------------------------------------------------------------------------------------------------------------------------------------------------------|
| 1175 | c29128_g1_i1_len_1331_path_74_0_23_98_24_9<br>3_809_94_244_959_245_246_120_247_330_104<br>4_331_1057_1771_1_5 | 150 | beta- -n-acetylglactosaminyl transferase (bre-4) | 443 | 4.35E-25  | 67.80% | 0.147 | IPR027995 (PFAM); IPR029044 (G3DSA:3.90.550.GENE3D); IPR003859 (PANTHER); TRANSMEMBRANE (PHOBIUS); CYTOPLASMIC_DOMAIN (PHOBIUS); NON_CYTOPLASMIC_DOMAIN (PHOBIUS); TRANSMEMBRANE (PHOBIUS); NON_CYTOPLASMIC_DOMAIN (PHOBIUS); CYTOPLASMIC_DOMAIN (PHOBIUS); TRANSMEMBRANE (PHOBIUS); IPR029044 (SUPERFAMILY); TMhelix (TMHMM); TMhelix (TMHMM); TMhelix (TMHMM)                                                                                                                                                                                                                                                                                                                                                                                                                                                                                                                                                                                                                                                                                                            |
| 1176 | c29128_g1_i2_len_1906_path_143_0_414_98_41<br>5_484_625_485_668_809_669_819_959_820_82<br>1_120_822_905_104_5 | 389 | beta- -n-acetylglactosaminyltransferase bre-4    | 628 | 8.81E-92  | 70.50% | 0.147 | IPR003859 (PRINTS); IPR027995 (PFAM); IPR029044 (G3DSA:3.90.550.GENE3D); IPR027791 (PFAM); IPR003859 (PANTHER); TRANSMEMBRANE (PHOBIUS); CYTOPLASMIC_DOMAIN (PHOBIUS); NON_CYTOPLASMIC_DOMAIN (PHOBIUS); TRANSMEMBRANE (PHOBIUS); TRANSMEMBRANE (PHOBIUS); NON_CYTOPLASMIC_DOMAIN (PHOBIUS); CYTOPLASMIC_DOMAIN (PHOBIUS); IPR029044 (SUPERFAMILY); TMhelix (TMHMM); TMhelix (TMHMM); TMhelix (TMHMM)                                                                                                                                                                                                                                                                                                                                                                                                                                                                                                                                                                                                                                                                      |
| 1177 | c29128_g1_i3_len_1010_path_143_0_414_98_41<br>5_484_625_485_668_809_669_819_959_820_82<br>1_120_822_905_194_3 | 221 | beta- -n-acetylglactosaminyltransferase bre-4    | 330 | 2.75E-87  | 73.50% | 0.163 | IPR003859 (PRINTS); IPR029044 (G3DSA:3.90.550.GENE3D); IPR027791 (PFAM); IPR027995 (PFAM); IPR003859 (PANTHER); IPR029044 (SUPERFAMILY)                                                                                                                                                                                                                                                                                                                                                                                                                                                                                                                                                                                                                                                                                                                                                                                                                                                                                                                                    |
| 1178 | c29128_g1_i4_len_826_path_143_0_414_98_415<br>_484_809_485_635_959_636_637_120_638_721<br>1940_722_722_194_3  | 58  | beta- -n-acetylglactosaminyl transferase (bre-4) | 269 | 2.36E-19  | 70.80% | 0.163 | IPR029044 (G3DSA:3.90.550.GENE3D); IPR027995 (PFAM); IPR003859 (PANTHER); IPR029044 (SUPERFAMILY)                                                                                                                                                                                                                                                                                                                                                                                                                                                                                                                                                                                                                                                                                                                                                                                                                                                                                                                                                                          |
| 1179 | c29128_g1_i4_len_826_path_143_0_414_98_415<br>_484_809_485_635_959_636_637_120_638_721<br>1940_722_722_194_5  | 58  | beta- -n-acetylglactosaminyltransferase bre-4    | 268 | 4.14E-20  | 71.70% | 0.163 | IPR003859 (PRINTS); IPR029044 (G3DSA:3.90.550.GENE3D); IPR027791 (PFAM); IPR003859 (PANTHER); IPR029044 (SUPERFAMILY)                                                                                                                                                                                                                                                                                                                                                                                                                                                                                                                                                                                                                                                                                                                                                                                                                                                                                                                                                      |
| 1180 | c29159_g1_i1_len_2722_path_5828_0_666_57_6<br>67_2721_0                                                       | 467 | monocarboxylate transporter 10 isoform x1        | 901 | 1.46E-168 | 72.50% | 0.091 | G3DSA:1.20.1250.20 (GENE3D); IPR011701 (PFAM); PTHR11360:SF90 (PANTHER); PTHR11360 (PANTHER); TRANSMEMBRANE (PHOBIUS); NON_CYTOPLASMIC_DOMAIN (PHOBIUS); TRANSMEMBRANE (PHOBIUS); TRANSMEMBRANE (PHOBIUS); NON_CYTOPLASMIC_DOMAIN (PHOBIUS); NON_CYTOPLASMIC_DOMAIN (PHOBIUS); TRANSMEMBRANE (PHOBIUS); TRANSMEMBRANE (PHOBIUS); CYTOPLASMIC_DOMAIN (PHOBIUS); NON_CYTOPLASMIC_DOMAIN (PHOBIUS); TRANSMEMBRANE (PHOBIUS); NON_CYTOPLASMIC_DOMAIN (PHOBIUS); TRANSMEMBRANE (PHOBIUS); CYTOPLASMIC_DOMAIN (PHOBIUS); TRANSMEMBRANE (PHOBIUS); TRANSMEMBRANE (PHOBIUS); TRANSMEMBRANE (PHOBIUS); CYTOPLASMIC_DOMAIN (PHOBIUS); TRANSMEMBRANE (PHOBIUS); TRANSMEMBRANE (PHOBIUS); TRANSMEMBRANE (PHOBIUS); CYTOPLASMIC_DOMAIN (PHOBIUS); NON_CYTOPLASMIC_DOMAIN (PHOBIUS); IPR020846 (PROSITE_PROFILES); IPR020846 (SUPERFAMILY); TMhelix (TMHMM); TMhelix (TMHMM) |

[illegible]

|      |                                                                                                      |     |                                                   |     |           |        |         |                                                                                                                                                                                                                                                                                                                                                                                                                                                                                                                                                                                                                                                                                                                                   |
|------|------------------------------------------------------------------------------------------------------|-----|---------------------------------------------------|-----|-----------|--------|---------|-----------------------------------------------------------------------------------------------------------------------------------------------------------------------------------------------------------------------------------------------------------------------------------------------------------------------------------------------------------------------------------------------------------------------------------------------------------------------------------------------------------------------------------------------------------------------------------------------------------------------------------------------------------------------------------------------------------------------------------|
| 1187 | c29241_g2_i1_len_2602_path_2978_0_306_308_307_764_3741_765_1372_4349_1373_1376_4353_1377_1582_4559_1 | 843 | alpha beta hydrolase domain-containing protein 13 | 859 | 1.73E-137 | 75.10% | 0.241   | IPR029059 (PFAM); IPR029058 (G3DSA:3.40.50.GENE3D); PTHR12277 (PANTHER); CYTOPLASMIC_DOMAIN (PHOBIUS); TRANSMEMBRANE (PHOBIUS); TRANSMEMBRANE (PHOBIUS); CYTOPLASMIC_DOMAIN (PHOBIUS); TRANSMEMBRANE (PHOBIUS); CYTOPLASMIC_DOMAIN (PHOBIUS); NON_CYTOPLASMIC_DOMAIN (PHOBIUS); TRANSMEMBRANE (PHOBIUS); TRANSMEMBRANE (PHOBIUS); NON_CYTOPLASMIC_DOMAIN (PHOBIUS); CYTOPLASMIC_DOMAIN (PHOBIUS); TRANSMEMBRANE (PHOBIUS); TRANSMEMBRANE (PHOBIUS); NON_CYTOPLASMIC_DOMAIN (PHOBIUS); CYTOPLASMIC_DOMAIN (PHOBIUS); NON_CYTOPLASMIC_DOMAIN (PHOBIUS); IPR029058 (SUPERFAMILY); TMhelix (TMHMM); TMhelix (TMHMM); TMhelix (TMHMM); TMhelix (TMHMM); TMhelix (TMHMM)                                                                |
| 1188 | c29248_g1_i1_len_2471_path_3073_0_16_789_17_417_84_418_496_747_497_779_3845_780_803_182_804_1395_3   | 363 | chorion peroxidase-like                           | 818 | 8.80E-97  | 68.50% | 0.139   | IPR019791 (PRINTS); IPR019791 (G3DSA:1.10.640.GENE3D); IPR019791 (PFAM); PTHR11475 (PANTHER); NON_CYTOPLASMIC_DOMAIN (PHOBIUS); CYTOPLASMIC_DOMAIN (PHOBIUS); TRANSMEMBRANE (PHOBIUS); TRANSMEMBRANE (PHOBIUS); IPR019791 (PROSITE_PROFILES); IPR010255 (SUPERFAMILY)                                                                                                                                                                                                                                                                                                                                                                                                                                                             |
| 1189 | c29248_g1_i1_len_2471_path_3073_0_16_789_17_417_84_418_496_747_497_779_3845_780_803_182_804_1395_5   | 363 | hypothetical protein DAPPUDRAFT_196945            | 818 | 1.09E-76  | 63.20% | 0.115   | IPR019791 (PRINTS); IPR019791 (PFAM); IPR019791 (G3DSA:1.10.640.GENE3D); PTHR11475 (PANTHER); NON_CYTOPLASMIC_DOMAIN (PHOBIUS); CYTOPLASMIC_DOMAIN (PHOBIUS); TRANSMEMBRANE (PHOBIUS); IPR019791 (PROSITE_PROFILES); IPR010255 (SUPERFAMILY)                                                                                                                                                                                                                                                                                                                                                                                                                                                                                      |
| 1190 | c29274_g1_i1_len_1721_path_1938_0_461_228_462_462_229_463_644_2578_645_662_2596_663_1720_5           | 661 | aldose reductase                                  | 565 | 6.95E-152 | 77.50% | 0.538 Y | IPR020471 (PRINTS); IPR023210 (PFAM); IPR023210 (G3DSA:3.20.20.GENE3D); IPR001395 (PANTHER); PTHR11732:SF202 (PANTHER); IPR018170 (PROSITE_PATTERNS); IPR018170 (PROSITE_PATTERNS); IPR018170 (PROSITE_PATTERNS); TRANSMEMBRANE (PHOBIUS); NON_CYTOPLASMIC_DOMAIN (PHOBIUS); SIGNAL_PEPTIDE (PHOBIUS); TRANSMEMBRANE (PHOBIUS); CYTOPLASMIC_DOMAIN (PHOBIUS); NON_CYTOPLASMIC_DOMAIN (PHOBIUS); CYTOPLASMIC_DOMAIN (PHOBIUS); SIGNAL_PEPTIDE_N_REGION (PHOBIUS); SIGNAL_PEPTIDE_C_REGION (PHOBIUS); SIGNAL_PEPTIDE_H_REGION (PHOBIUS); TRANSMEMBRANE (PHOBIUS); NON_CYTOPLASMIC_DOMAIN (PHOBIUS); TRANSMEMBRANE (PHOBIUS); SignalP-noTM (SIGNALP_EUK); IPR023210 (SUPERFAMILY); TMhelix (TMHMM); TMhelix (TMHMM); TMhelix (TMHMM) |
| 1191 | c29291_g1_i1_len_1797_path_1703_0_100_1804_101_102_102_103_750_5482_751_1415_907_1416_1796_0         | 384 | superoxide dismutase                              | 592 | 8.81E-62  | 68.70% | 0.203   | IPR001424 (PRINTS); IPR001424 (G3DSA:2.60.40.GENE3D); IPR001424 (G3DSA:2.60.40.GENE3D); IPR001424 (PFAM); PTHR10003 (PANTHER); IPR018152 (PROSITE_PATTERNS); IPR018152 (PROSITE_PATTERNS); TRANSMEMBRANE (PHOBIUS); CYTOPLASMIC_DOMAIN (PHOBIUS); NON_CYTOPLASMIC_DOMAIN (PHOBIUS); IPR001424 (SUPERFAMILY); IPR001424 (SUPERFAMILY); TMhelix (TMHMM)                                                                                                                                                                                                                                                                                                                                                                             |
| 1192 | c29291_g1_i2_len_1127_path_103_0_80_5482_81_745_907_746_1126_2                                       | 237 | superoxide dismutase                              | 368 | 5.98E-63  | 67.80% | 0.115   | IPR001424 (PRINTS); IPR001424 (G3DSA:2.60.40.GENE3D); IPR001424 (PFAM); IPR001424 (G3DSA:2.60.40.GENE3D); PTHR10003 (PANTHER); IPR018152 (PROSITE_PATTERNS); IPR018152 (PROSITE_PATTERNS); IPR001424 (SUPERFAMILY); IPR001424 (SUPERFAMILY)                                                                                                                                                                                                                                                                                                                                                                                                                                                                                       |
| 1193 | c29291_g1_i3_len_1718_path_78_0_23_102_24_671_5482_672_1336_907_1337_1717_2                          | 381 | superoxide dismutase                              | 565 | 7.48E-62  | 68.70% | 0.11    | IPR001424 (PRINTS); IPR001424 (G3DSA:2.60.40.GENE3D); IPR001424 (PFAM); IPR001424 (G3DSA:2.60.40.GENE3D); PTHR10003 (PANTHER); IPR018152 (PROSITE_PATTERNS); IPR018152 (PROSITE_PATTERNS); NON_CYTOPLASMIC_DOMAIN (PHOBIUS); TRANSMEMBRANE (PHOBIUS); CYTOPLASMIC_DOMAIN (PHOBIUS); IPR001424 (SUPERFAMILY); IPR001424 (SUPERFAMILY); TMhelix (TMHMM)                                                                                                                                                                                                                                                                                                                                                                             |
| 1194 | c29291_g1_i4_len_1021_path_267_0_639_907_640_1020_1                                                  | 49  | superoxide dismutase                              | 333 | 2.15E-24  | 71.00% | 0.125   | IPR001424 (PRINTS); IPR001424 (G3DSA:2.60.40.GENE3D); IPR001424 (PFAM); PTHR10003 (PANTHER); IPR018152 (PROSITE_PATTERNS); NON_CYTOPLASMIC_DOMAIN (PHOBIUS); TRANSMEMBRANE (PHOBIUS); NON_CYTOPLASMIC_DOMAIN (PHOBIUS); TRANSMEMBRANE (PHOBIUS); CYTOPLASMIC_DOMAIN (PHOBIUS); IPR001424 (SUPERFAMILY)                                                                                                                                                                                                                                                                                                                                                                                                                            |

|      |                                                                                                       |        |                                                                              |     |           |        |         |                                                                                                                                                                                                                                                                                                                                                                                                                                                                                                                                                                                                                                                                          |
|------|-------------------------------------------------------------------------------------------------------|--------|------------------------------------------------------------------------------|-----|-----------|--------|---------|--------------------------------------------------------------------------------------------------------------------------------------------------------------------------------------------------------------------------------------------------------------------------------------------------------------------------------------------------------------------------------------------------------------------------------------------------------------------------------------------------------------------------------------------------------------------------------------------------------------------------------------------------------------------------|
| 1195 | c29291_g1_i5_len_1775_path_3699_0_78_1804_79_80_102_81_728_5482_729_1393_907_1394_1774_2              | 390    | superoxide dismutase                                                         | 584 | 8.72E-62  | 68.60% | 0.201   | IPR001424 (PRINTS); IPR001424 (PFAM); IPR001424 (G3DSA:2.60.40.GENE3D); IPR001424 (G3DSA:2.60.40.GENE3D); PTHR10003 (PANTHER); IPR018152 (PROSITE_PATTERNS); IPR018152 (PROSITE_PATTERNS); CYTOPLASMIC_DOMAIN (PHOBIUS); TRANSMEMBRANE (PHOBIUS); NON_CYTOPLASMIC_DOMAIN (PHOBIUS); TRANSMEMBRANE (PHOBIUS); NON_CYTOPLASMIC_DOMAIN (PHOBIUS); IPR001424 (SUPERFAMILY); IPR001424 (SUPERFAMILY); TMhelix (TMHMM); TMhelix (TMHMM)                                                                                                                                                                                                                                        |
| 1196 | c29302_g1_i1_len_1580_path_3261_0_875_1798_876_901_2502_902_1579_0                                    | 57     | scp-like extracellular domain containing protein 1                           | 520 | 9.15E-37  | 49.00% | 0.356 Y | IPR002413 (PRINTS); IPR001283 (PRINTS); IPR014044 (SMART); IPR002172 (SMART); IPR002172 (PFAM); IPR002172 (G3DSA:4.10.400.GENE3D); IPR014044 (G3DSA:3.40.33.GENE3D); IPR014044 (PFAM); IPR002172 (G3DSA:4.10.400.GENE3D); IPR001283 (PANTHER); IPR023415 (PROSITE_PATTERNS); IPR023415 (PROSITE_PATTERNS); IPR018244 (PROSITE_PATTERNS); TRANSMEMBRANE (PHOBIUS); NON_CYTOPLASMIC_DOMAIN (PHOBIUS); CYTOPLASMIC_DOMAIN (PHOBIUS); CYTOPLASMIC_DOMAIN (PHOBIUS); TRANSMEMBRANE (PHOBIUS); IPR002172 (PROSITE_PROFILES); IPR002172 (PROSITE_PROFILES); IPR002172 (SUPERFAMILY); IPR002172 (SUPERFAMILY); IPR014044 (SUPERFAMILY); IPR002172 (SUPERFAMILY); TMhelix (TMHMM) |
| 1197 | c29302_g2_i1_len_1937_path_952_0_847_1798_848_873_4161_874_1831_7386_1832_1850_513_2_1851_1893_5175_2 | 104    | ves g 5 allergen                                                             | 645 | 2.13E-41  | 51.40% | 0.271   | IPR002413 (PRINTS); IPR001283 (PRINTS); IPR002172 (SMART); IPR014044 (SMART); IPR002172 (G3DSA:4.10.400.GENE3D); IPR014044 (G3DSA:3.40.33.GENE3D); IPR014044 (PFAM); IPR002172 (PFAM); IPR002172 (G3DSA:4.10.400.GENE3D); IPR001283 (PANTHER); IPR018244 (PROSITE_PATTERNS); IPR018244 (PROSITE_PATTERNS); CYTOPLASMIC_DOMAIN (PHOBIUS); NON_CYTOPLASMIC_DOMAIN (PHOBIUS); TRANSMEMBRANE (PHOBIUS); IPR002172 (PROSITE_PROFILES); IPR002172 (PROSITE_PROFILES); IPR014044 (SUPERFAMILY); IPR002172 (SUPERFAMILY); IPR002172 (SUPERFAMILY)                                                                                                                                |
| 1198 | c29328_g1_i1_len_2864_path_215_0_1226_1439_1227_1230_110_1231_2863_5                                  | 279    | serine proteinase stubble                                                    | 949 | 2.17E-104 | 61.80% | 0.172   | Coil (COILS); IPR001314 (PRINTS); IPR001254 (SMART); G3DSA:2.40.10.10 (GENE3D); IPR001254 (PFAM); G3DSA:2.40.10.10 (GENE3D); PTHR24268:SF95 (PANTHER); PTHR24268 (PANTHER); IPR018114 (PROSITE_PATTERNS); CYTOPLASMIC_DOMAIN (PHOBIUS); NON_CYTOPLASMIC_DOMAIN (PHOBIUS); TRANSMEMBRANE (PHOBIUS); CYTOPLASMIC_DOMAIN (PHOBIUS); TRANSMEMBRANE (PHOBIUS); NON_CYTOPLASMIC_DOMAIN (PHOBIUS); TRANSMEMBRANE (PHOBIUS); IPR001254 (PROSITE_PROFILES); IPR009003 (SUPERFAMILY)                                                                                                                                                                                               |
| 1199 | c29331_g1_i2_len_1846_path_105_0_612_715_6_13_615_52_616_1096_1198_1097_1252_1354_1_253_1845_0        | 515    | upf0764 protein c16orf89 homolog                                             | 610 | 2.88E-46  | 47.50% | 0.239   | CYTOPLASMIC_DOMAIN (PHOBIUS); TRANSMEMBRANE (PHOBIUS); CYTOPLASMIC_DOMAIN (PHOBIUS); NON_CYTOPLASMIC_DOMAIN (PHOBIUS); TRANSMEMBRANE (PHOBIUS); TMhelix (TMHMM)                                                                                                                                                                                                                                                                                                                                                                                                                                                                                                          |
| 1200 | c29341_g1_i1_len_1310_path_3_0_55_59_56_5_37_541_538_671_675_672_859_3499_860_860_917_861_1309_2      | 108    | carbonyl reductase                                                           | 431 | 3.41E-98  | 74.80% | 0.119   | IPR002198 (PRINTS); IPR002347 (PRINTS); IPR002198 (PFAM); IPR016040 (G3DSA:3.40.50.GENE3D); PTHR24322 (PANTHER); PTHR24322:SF58 (PANTHER); TRANSMEMBRANE (PHOBIUS); TRANSMEMBRANE (PHOBIUS); NON_CYTOPLASMIC_DOMAIN (PHOBIUS); CYTOPLASMIC_DOMAIN (PHOBIUS); NON_CYTOPLASMIC_DOMAIN (PHOBIUS); SSF51735 (SUPERFAMILY); TMhelix (TMHMM); TMhelix (TMHMM)                                                                                                                                                                                                                                                                                                                  |
| 1201 | c29341_g1_i2_len_1363_path_3_0_55_59_56_5_37_541_538_671_675_672_859_3499_860_860_864_861_893_897_2   | 206    | carbonyl reductase                                                           | 448 | 1.72E-126 | 74.90% | 0.119   | IPR002198 (PRINTS); IPR002347 (PRINTS); IPR016040 (G3DSA:3.40.50.GENE3D); IPR002198 (PFAM); PTHR24322 (PANTHER); PTHR24322:SF58 (PANTHER); SSF51735 (SUPERFAMILY)                                                                                                                                                                                                                                                                                                                                                                                                                                                                                                        |
| 1202 | c29360_g3_i1_len_1609_path_611_0_608_7820_609_768_1380_769_778_1390_779_1344_6082_1345_1347_5422_13_1 | 234789 | pdgf- and vegf-related factor 1-like precursor                               | 530 | 1.08E-38  | 53.10% | 0.201   | IPR000072 (SMART); IPR000072 (PFAM); IPR029034 (G3DSA:2.10.90.GENE3D); PTHR11633 (PANTHER); PTHR11633:SF1 (PANTHER); SIGNAL_PEPTIDE (PHOBIUS); SIGNAL_PEPTIDE_H_REGION (PHOBIUS); SIGNAL_PEPTIDE_C_REGION (PHOBIUS); NON_CYTOPLASMIC_DOMAIN (PHOBIUS); SIGNAL_PEPTIDE_N_REGION (PHOBIUS); IPR000072 (PROSITE_PROFILES); IPR029034 (SUPERFAMILY)                                                                                                                                                                                                                                                                                                                          |
| 1203 | c29368_g1_i1_len_1913_path_293_0_1292_4277_1293_1293_214_1294_1912_0                                  | 556    | 2-oxoglutarate and iron-dependent oxygenase domain-containing protein 3-like | 633 | 1.55E-137 | 74.40% | 0.105   | IPR006620 (SMART); IPR005123 (PFAM); PTHR14650 (PANTHER); PTHR14650:SF1 (PANTHER); TRANSMEMBRANE (PHOBIUS); CYTOPLASMIC_DOMAIN (PHOBIUS); CYTOPLASMIC_DOMAIN (PHOBIUS); TRANSMEMBRANE (PHOBIUS); TRANSMEMBRANE (PHOBIUS); NON_CYTOPLASMIC_DOMAIN (PHOBIUS); NON_CYTOPLASMIC_DOMAIN (PHOBIUS); IPR005123 (PROSITE_PROFILES)                                                                                                                                                                                                                                                                                                                                               |



|      |                                                                                                        |      |                                                  |     |           |        |       |                                                                                                                                                                                                                                                                                                                                                                                                                                                                                                                                                                                                                            |
|------|--------------------------------------------------------------------------------------------------------|------|--------------------------------------------------|-----|-----------|--------|-------|----------------------------------------------------------------------------------------------------------------------------------------------------------------------------------------------------------------------------------------------------------------------------------------------------------------------------------------------------------------------------------------------------------------------------------------------------------------------------------------------------------------------------------------------------------------------------------------------------------------------------|
| 1204 | c29370_g1_i1_len_2262_path_2239_0_570_2810_571_589_2829_590_1942_5032_1943_1943_4_182_1944_1959_4_0    | 285  | n-acetylglucosamine-6-sulfatase-like isoform x1  | 748 | 1.88E-171 | 61.10% | 0.265 | IPR017849 (G3DSA:3.40.720.GENE3D); IPR000917 (PFAM); PTHR10342:SF208 (PANTHER); PTHR10342 (PANTHER); IPR024607 (PROSITE_PATTERNS); TRANSMEMBRANE (PHOBIUS); CYTOPLASMIC_DOMAIN (PHOBIUS); CYTOPLASMIC_DOMAIN (PHOBIUS); TRANSMEMBRANE (PHOBIUS); NON_CYTOPLASMIC_DOMAIN (PHOBIUS); IPR017850 (SUPERFAMILY); TMhelix (TMHMM); TMhelix (TMHMM)                                                                                                                                                                                                                                                                               |
| 1205 | c29380_g1_i2_len_2326_path_3281_0_1357_608_1358_2115_3010_2116_2145_927_2146_2325_4                    | 141  | zinc finger protein 470-like                     | 775 | 8.57E-56  | 63.30% | 0.159 | IPR015880 (SMART); PF13465 (PFAM); IPR013087 (G3DSA:3.30.160.GENE3D); IPR013087 (G3DSA:3.30.160.GENE3D); PTHR24409 (PANTHER); IPR007087 (PROSITE_PATTERNS); IPR007087 (PROSITE_PATTERNS); IPR007087 (PROSITE_PATTERNS); IPR007087 (PROSITE_PATTERNS); IPR007087 (PROSITE_PROFILES); IPR007087 (PROSITE_PROFILES); IPR007087 (PROSITE_PROFILES); IPR007087 (PROSITE_PROFILES); IPR007087 (PROSITE_PROFILES); IPR007087 (PROSITE_PROFILES); SSF57667 (SUPERFAMILY); SSF57667 (SUPERFAMILY); SSF57667 (SUPERFAMILY); SSF57667 (SUPERFAMILY)                                                                                   |
| 1206 | c29383_g3_i1_len_2162_path_6862_0_38_2757_39_83_2802_84_473_3192_474_551_3270_552_576_13518_577_601_1  | 86   | transposable element tcb1 partial                | 715 | 9.79E-25  | 61.50% | 0.224 | IPR002172 (PRINTS); IPR002172 (SMART); IPR002172 (G3DSA:4.10.400.GENE3D); IPR002172 (G3DSA:4.10.400.GENE3D); IPR002172 (PFAM); PTHR10529 (PANTHER); IPR023415 (PROSITE_PATTERNS); IPR023415 (PROSITE_PATTERNS); NON_CYTOPLASMIC_DOMAIN (PHOBIUS); CYTOPLASMIC_DOMAIN (PHOBIUS); TRANSMEMBRANE (PHOBIUS); IPR002172 (PROSITE_PROFILES); IPR002172 (PROSITE_PROFILES); IPR002172 (SUPERFAMILY); IPR002172 (SUPERFAMILY)                                                                                                                                                                                                      |
| 1207 | c2939_g1_i1_len_1555_path_1531_0_1004_3105_1005_1006_2536_1007_1554_2                                  | 39   | cd109 antigen                                    | 511 | 6.78E-118 | 76.00% | 0.205 | IPR009048 (PFAM); IPR009048 (G3DSA:2.60.40.GENE3D); IPR008930 (G3DSA:1.50.10.GENE3D); IPR011626 (PFAM); PTHR11412:SF85 (PANTHER); PTHR11412 (PANTHER); TRANSMEMBRANE (PHOBIUS); CYTOPLASMIC_DOMAIN (PHOBIUS); NON_CYTOPLASMIC_DOMAIN (PHOBIUS); IPR008930 (SUPERFAMILY); IPR009048 (SUPERFAMILY)                                                                                                                                                                                                                                                                                                                           |
| 1208 | c29395_g1_i2_len_1647_path_1789_0_96_1886_97_156_2110_157_326_2280_327_458_2412_45_9_490_4076_491_56_2 | 43   | nicotinic acetylcholine receptor subunit alpha10 | 543 | 7.79E-87  | 55.90% | 0.15  | Coil (COILS); IPR006201 (PRINTS); IPR027361 (G3DSA:1.20.120.GENE3D); IPR006202 (G3DSA:2.70.170.GENE3D); IPR006202 (PFAM); IPR006029 (PFAM); IPR006201 (PANTHER); PTHR18945:SF481 (PANTHER); CYTOPLASMIC_DOMAIN (PHOBIUS); TRANSMEMBRANE (PHOBIUS); TRANSMEMBRANE (PHOBIUS); NON_CYTOPLASMIC_DOMAIN (PHOBIUS); CYTOPLASMIC_DOMAIN (PHOBIUS); CYTOPLASMIC_DOMAIN (PHOBIUS); NON_CYTOPLASMIC_DOMAIN (PHOBIUS); TRANSMEMBRANE (PHOBIUS); NON_CYTOPLASMIC_DOMAIN (PHOBIUS); TRANSMEMBRANE (PHOBIUS); IPR006202 (SUPERFAMILY); IPR006029 (SUPERFAMILY); TMhelix (TMHMM); TMhelix (TMHMM); TMhelix (TMHMM)                        |
| 1209 | c29395_g1_i3_len_1811_path_1789_0_96_1886_97_156_1946_157_311_2101_312_320_2110_32_1_490_4764_491_62_1 | 119  | nicotinic acetylcholine receptor subunit alpha10 | 598 | 2.78E-98  | 55.40% | 0.266 | Coil (COILS); IPR002394 (PRINTS); IPR006201 (PRINTS); IPR006202 (PFAM); IPR006029 (PFAM); IPR027361 (G3DSA:1.20.120.GENE3D); IPR006202 (G3DSA:2.70.170.GENE3D); IPR006201 (PANTHER); PTHR18945:SF481 (PANTHER); TRANSMEMBRANE (PHOBIUS); TRANSMEMBRANE (PHOBIUS); TRANSMEMBRANE (PHOBIUS); CYTOPLASMIC_DOMAIN (PHOBIUS); CYTOPLASMIC_DOMAIN (PHOBIUS); NON_CYTOPLASMIC_DOMAIN (PHOBIUS); TRANSMEMBRANE (PHOBIUS); TRANSMEMBRANE (PHOBIUS); NON_CYTOPLASMIC_DOMAIN (PHOBIUS); TRANSMEMBRANE (PHOBIUS); IPR006202 (SUPERFAMILY); IPR006029 (SUPERFAMILY); TMhelix (TMHMM); TMhelix (TMHMM); TMhelix (TMHMM); TMhelix (TMHMM) |
| 1210 | c29403_g1_i1_len_1327_path_1899_0_676_3408_677_678_3410_679_681_2579_682_690_283_6_91_704_506_705_95_0 | 1514 | macrophage migration inhibitory factor           | 435 | 3.02E-37  | 69.80% | 0.11  | G3DSA:3.30.429.10 (GENE3D); IPR001398 (PFAM); IPR001398 (PANTHER); PTHR11954:SF6 (PANTHER); IPR001398 (PRODOM); IPR014347 (SUPERFAMILY)                                                                                                                                                                                                                                                                                                                                                                                                                                                                                    |
| 1211 | c29404_g1_i1_len_2223_path_2201_0_845_3047_846_1505_3707_1506_1507_3709_1508_1890_4092_1891_1893_2     | 302  | alpha-mannosidase 2                              | 735 | 1.36E-160 | 58.80% | 0.1   | G3DSA:2.70.98.30 (GENE3D); IPR011682 (PFAM); G3DSA:1.10.287.530 (GENE3D); IPR015341 (PFAM); IPR013780 (G3DSA:2.60.40.GENE3D); PTHR11607 (PANTHER); PTHR11607:SF4 (PANTHER); TRANSMEMBRANE (PHOBIUS); CYTOPLASMIC_DOMAIN (PHOBIUS); NON_CYTOPLASMIC_DOMAIN (PHOBIUS); IPR028995 (SUPERFAMILY); IPR011013 (SUPERFAMILY); TMhelix (TMHMM)                                                                                                                                                                                                                                                                                     |

|      |                                                                                                       |     |                                                       |     |           |        |         |                                                                                                                                                                                                                                                                                                                                                                                                                                                                                                                                                                                                                                                                    |
|------|-------------------------------------------------------------------------------------------------------|-----|-------------------------------------------------------|-----|-----------|--------|---------|--------------------------------------------------------------------------------------------------------------------------------------------------------------------------------------------------------------------------------------------------------------------------------------------------------------------------------------------------------------------------------------------------------------------------------------------------------------------------------------------------------------------------------------------------------------------------------------------------------------------------------------------------------------------|
| 1212 | c29417_g1_i2_len_1178_path_251_0_699_951_7_00_998_147_999_1177_4                                      | 19  | low quality protein: beta-mannosidase                 | 393 | 3.92E-31  | 66.30% | 0.358 Y | IPR008979 (G3DSA:2.60.120.GENE3D); IPR006104 (PFAM); IPR028369 (PTHR10066:PANTHER); PTHR10066 (PANTHER); NON_CYTOPLASMIC_DOMAIN (PHOBIUS); TRANSMEMBRANE (PHOBIUS); TRANSMEMBRANE (PHOBIUS); CYTOPLASMIC_DOMAIN (PHOBIUS); SIGNAL_PEPTIDE (PHOBIUS); TRANSMEMBRANE (PHOBIUS); SIGNAL_PEPTIDE_C_REGION (PHOBIUS); SIGNAL_PEPTIDE_N_REGION (PHOBIUS); SIGNAL_PEPTIDE_H_REGION (PHOBIUS); CYTOPLASMIC_DOMAIN (PHOBIUS); NON_CYTOPLASMIC_DOMAIN (PHOBIUS); IPR008979 (SUPERFAMILY); TMhelix (TMHMM); TMhelix (TMHMM); TMhelix (TMHMM)                                                                                                                                  |
| 1213 | c29417_g2_i1_len_2274_path_4512_0_6_4519_7_169_1677_170_327_4838_328_329_1794_330_649_22_650_1025_1_4 | 393 | beta-mannosidase                                      | 758 | 0         | 62.50% | 0.128   | IPR013812 (G3DSA:2.60.40.GENE3D); IPR013781 (G3DSA:3.20.20.GENE3D); IPR006102 (PFAM); IPR006103 (PFAM); PTHR10066 (PANTHER); IPR028369 (PTHR10066:PANTHER); TRANSMEMBRANE (PHOBIUS); NON_CYTOPLASMIC_DOMAIN (PHOBIUS); CYTOPLASMIC_DOMAIN (PHOBIUS); IPR006102 (SUPERFAMILY); IPR017853 (SUPERFAMILY); IPR006102 (SUPERFAMILY); IPR006102 (SUPERFAMILY)                                                                                                                                                                                                                                                                                                            |
| 1214 | c29417_g2_i2_len_396_path_2_0_19_22_20_395_4                                                          | 6   | beta-mannosidase                                      | 132 | 4.31E-41  | 75.20% | 0.114   | IPR013781 (G3DSA:3.20.20.GENE3D); PTHR10066 (PANTHER); IPR028369 (PTHR10066:PANTHER); IPR017853 (SUPERFAMILY)                                                                                                                                                                                                                                                                                                                                                                                                                                                                                                                                                      |
| 1215 | c29428_g1_i1_len_2184_path_287_0_249_537_2_50_251_256_252_1084_1366_1085_1085_271_1086_1231_1512_2    | 892 | serine-threonine kinase receptor-associated protein   | 721 | 0         | 85.50% | 0.113   | IPR001680 (SMART); IPR015943 (G3DSA:2.130.10.GENE3D); IPR001680 (PFAM); PTHR19877 (PANTHER); IPR019775 (PROSITE_PATTERNS); TRANSMEMBRANE (PHOBIUS); CYTOPLASMIC_DOMAIN (PHOBIUS); NON_CYTOPLASMIC_DOMAIN (PHOBIUS); NON_CYTOPLASMIC_DOMAIN (PHOBIUS); TRANSMEMBRANE (PHOBIUS); CYTOPLASMIC_DOMAIN (PHOBIUS); TRANSMEMBRANE (PHOBIUS); IPR001680 (PROSITE_PROFILES); IPR001680 (PROSITE_PROFILES); IPR001680 (PROSITE_PROFILES); IPR001680 (PROSITE_PROFILES); IPR017986 (PROSITE_PROFILES); IPR017986 (SUPERFAMILY); TMhelix (TMHMM); TMhelix (TMHMM)                                                                                                              |
| 1216 | c29459_g7_i1_len_1655_path_10619_0_938_124_939_1654_1                                                 | 93  | polypeptide n-acetylgalactosaminyltransferase partial | 552 | 1.54E-29  | 77.70% | 0.102   | PTHR11675 (PANTHER); CYTOPLASMIC_DOMAIN (PHOBIUS); TRANSMEMBRANE (PHOBIUS); NON_CYTOPLASMIC_DOMAIN (PHOBIUS); IPR029044 (SUPERFAMILY)                                                                                                                                                                                                                                                                                                                                                                                                                                                                                                                              |
| 1217 | c29459_g7_i1_len_1655_path_10619_0_938_124_939_1654_2                                                 | 93  | polypeptide n-acetylgalactosaminyltransferase 2       | 551 | 1.03E-11  | 51.00% | 0.111   | IPR000772 (SMART); IPR000772 (PFAM); G3DSA:2.80.10.50 (GENE3D); PTHR11675:SF24 (PANTHER); PTHR11675 (PANTHER); CYTOPLASMIC_DOMAIN (PHOBIUS); NON_CYTOPLASMIC_DOMAIN (PHOBIUS); TRANSMEMBRANE (PHOBIUS); IPR000772 (PROSITE_PROFILES); IPR000772 (SUPERFAMILY); TMhelix (TMHMM)                                                                                                                                                                                                                                                                                                                                                                                     |
| 1218 | c29459_g7_i2_len_1677_path_10619_0_938_102_939_960_124_961_1676_1                                     | 77  | polypeptide n-acetylgalactosaminyltransferase partial | 559 | 1.81E-29  | 77.70% | 0.102   | PTHR11675 (PANTHER); TRANSMEMBRANE (PHOBIUS); NON_CYTOPLASMIC_DOMAIN (PHOBIUS); NON_CYTOPLASMIC_DOMAIN (PHOBIUS); TRANSMEMBRANE (PHOBIUS); TRANSMEMBRANE (PHOBIUS); CYTOPLASMIC_DOMAIN (PHOBIUS); CYTOPLASMIC_DOMAIN (PHOBIUS); IPR029044 (SUPERFAMILY)                                                                                                                                                                                                                                                                                                                                                                                                            |
| 1219 | c29459_g7_i2_len_1677_path_10619_0_938_102_939_960_124_961_1676_2                                     | 77  | polypeptide n-acetylgalactosaminyltransferase 2       | 559 | 8.59E-12  | 51.00% | 0.111   | IPR000772 (SMART); IPR000772 (PFAM); G3DSA:2.80.10.50 (GENE3D); PTHR11675 (PANTHER); PTHR11675:SF24 (PANTHER); IPR000772 (PROSITE_PROFILES); IPR000772 (SUPERFAMILY)                                                                                                                                                                                                                                                                                                                                                                                                                                                                                               |
| 1220 | c29464_g1_i1_len_1634_path_1768_0_98_110_99_1162_2927_1163_1164_2929_1165_1200_29_65_1201_1209_29_0   | 488 | epoxide hydrolase 4                                   | 539 | 6.69E-102 | 62.10% | 0.097   | IPR000639 (PRINTS); IPR029058 (G3DSA:3.40.50.GENE3D); IPR000073 (PFAM); PTHR10992:SF721 (PANTHER); PTHR10992 (PANTHER); TRANSMEMBRANE (PHOBIUS); CYTOPLASMIC_DOMAIN (PHOBIUS); TRANSMEMBRANE (PHOBIUS); NON_CYTOPLASMIC_DOMAIN (PHOBIUS); NON_CYTOPLASMIC_DOMAIN (PHOBIUS); IPR029058 (SUPERFAMILY); TMhelix (TMHMM); TMhelix (TMHMM)                                                                                                                                                                                                                                                                                                                              |
| 1221 | c29473_g3_i1_len_960_path_7628_0_399_2069_400_426_2096_427_595_2265_596_746_4806_7_47_959_1           | 38  | probable serine carboxypeptidase cpvl                 | 315 | 4.39E-17  | 79.20% | 0.465 Y | IPR029058 (G3DSA:3.40.50.GENE3D); IPR001563 (PFAM); IPR001563 (PANTHER); IPR018202 (PROSITE_PATTERNS); NON_CYTOPLASMIC_DOMAIN (PHOBIUS); SIGNAL_PEPTIDE_H_REGION (PHOBIUS); SIGNAL_PEPTIDE_C_REGION (PHOBIUS); SIGNAL_PEPTIDE (PHOBIUS); NON_CYTOPLASMIC_DOMAIN (PHOBIUS); NON_CYTOPLASMIC_DOMAIN (PHOBIUS); TRANSMEMBRANE (PHOBIUS); CYTOPLASMIC_DOMAIN (PHOBIUS); CYTOPLASMIC_DOMAIN (PHOBIUS); TRANSMEMBRANE (PHOBIUS); CYTOPLASMIC_DOMAIN (PHOBIUS); SIGNAL_PEPTIDE_N_REGION (PHOBIUS); TRANSMEMBRANE (PHOBIUS); TRANSMEMBRANE (PHOBIUS); TRANSMEMBRANE (PHOBIUS); IPR029058 (SUPERFAMILY); TMhelix (TMHMM); TMhelix (TMHMM); TMhelix (TMHMM); TMhelix (TMHMM) |





|      |                                                                                                      |     |                                                                             |     |          |        |       |                                                                                                                                                                                                                                                                                                                                                                                                                                                                                                                                                   |
|------|------------------------------------------------------------------------------------------------------|-----|-----------------------------------------------------------------------------|-----|----------|--------|-------|---------------------------------------------------------------------------------------------------------------------------------------------------------------------------------------------------------------------------------------------------------------------------------------------------------------------------------------------------------------------------------------------------------------------------------------------------------------------------------------------------------------------------------------------------|
| 1235 | c29554_g2_i1_len_2918_path_3020_0_137_3158_138_2917_1                                                | 796 | cathepsin d                                                                 | 973 | 0        | 80.70% | 0.149 | IPR001461 (PRINTS); IPR021109 (G3DSA:2.40.70.GENE3D); IPR001461 (PFAM); IPR021109 (G3DSA:2.40.70.GENE3D); IPR012848 (PFAM); IPR001461 (PANTHER); PTHR13683:SF230 (PANTHER); IPR001969 (PROSITE_PATTERNS); IPR001969 (PROSITE_PATTERNS); TRANSMEMBRANE (PHOBIUS); TRANSMEMBRANE (PHOBIUS); NON_CYTOPLASMIC_DOMAIN (PHOBIUS); CYTOPLASMIC_DOMAIN (PHOBIUS); CYTOPLASMIC_DOMAIN (PHOBIUS); NON_CYTOPLASMIC_DOMAIN (PHOBIUS); TRANSMEMBRANE (PHOBIUS); IPR021109 (SUPERFAMILY); TMhelix (TMHMM); TMhelix (TMHMM); TMhelix (TMHMM)                     |
| 1236 | c29591_g10_i1_len_1165_path_19478_0_156_83_18_157_160_35744_161_180_35764_181_194_3_6113_195_1164_3  | 48  | gamma-interferon-inducible lysosomal thiol reductase                        | 389 | 1.74E-48 | 57.20% | 0.251 | IPR004911 (PFAM); IPR004911 (PANTHER); PTHR13234:SF8 (PANTHER); CYTOPLASMIC_DOMAIN (PHOBIUS); TRANSMEMBRANE (PHOBIUS); TRANSMEMBRANE (PHOBIUS); NON_CYTOPLASMIC_DOMAIN (PHOBIUS); TRANSMEMBRANE (PHOBIUS); CYTOPLASMIC_DOMAIN (PHOBIUS); NON_CYTOPLASMIC_DOMAIN (PHOBIUS); TMhelix (TMHMM); TMhelix (TMHMM); TMhelix (TMHMM)                                                                                                                                                                                                                      |
| 1237 | c29591_g10_i2_len_990_path_35777_0_19_3611_3_20_989_3                                                | 30  | gamma-interferon-inducible lysosomal thiol reductase                        | 330 | 2.64E-49 | 57.20% | 0.251 | IPR004911 (PFAM); PTHR13234:SF8 (PANTHER); IPR004911 (PANTHER); TRANSMEMBRANE (PHOBIUS); CYTOPLASMIC_DOMAIN (PHOBIUS); NON_CYTOPLASMIC_DOMAIN (PHOBIUS); TMhelix (TMHMM)                                                                                                                                                                                                                                                                                                                                                                          |
| 1238 | c29603_g1_i1_len_3001_path_554_0_114_668_1_15_115_121_116_116_669_117_250_803_251_2_51_804_252_122_3 | 195 | neutral alpha-glucosidase ab-like                                           | 997 | 0        | 75.30% | 0.105 | IPR025887 (PFAM); IPR000322 (PFAM); PTHR22762 (PANTHER); PTHR22762:SF54 (PANTHER); NON_CYTOPLASMIC_DOMAIN (PHOBIUS); CYTOPLASMIC_DOMAIN (PHOBIUS); TRANSMEMBRANE (PHOBIUS); IPR011013 (SUPERFAMILY); SSF51011 (SUPERFAMILY); IPR017853 (SUPERFAMILY)                                                                                                                                                                                                                                                                                              |
| 1239 | c29603_g1_i2_len_665_path_7091_0_73_2954_7_4_664_3                                                   | 9   | neutral alpha-glucosidase ab-like                                           | 208 | 1.51E-82 | 76.70% | 0.105 | IPR025887 (PFAM); IPR000322 (PFAM); PTHR22762 (PANTHER); PTHR22762:SF54 (PANTHER); IPR011013 (SUPERFAMILY)                                                                                                                                                                                                                                                                                                                                                                                                                                        |
| 1240 | c29605_g1_i1_len_1307_path_1726_0_106_361_107_166_328_167_579_2303_580_581_2305_58_2_1306_0          | 320 | pacifastin light chain                                                      | 431 | 4.39E-16 | 50.70% | 0.103 | IPR008037 (PFAM); NON_CYTOPLASMIC_DOMAIN (PHOBIUS); TRANSMEMBRANE (PHOBIUS); TRANSMEMBRANE (PHOBIUS); CYTOPLASMIC_DOMAIN (PHOBIUS); NON_CYTOPLASMIC_DOMAIN (PHOBIUS); CYTOPLASMIC_DOMAIN (PHOBIUS); TRANSMEMBRANE (PHOBIUS); IPR020862 (PROSITE_PROFILES); IPR020862 (PROSITE_PROFILES); IPR008037 (SUPERFAMILY); IPR008037 (SUPERFAMILY); IPR008037 (SUPERFAMILY); TMhelix (TMHMM); TMhelix (TMHMM); TMhelix (TMHMM); TMhelix (TMHMM)                                                                                                            |
| 1241 | c29607_g1_i1_len_1464_path_3013_0_19_1446_20_199_1626_200_225_1652_226_1234_2661_1_235_1463_1        | 209 | zinc finger protein 569-like                                                | 481 | 1.05E-25 | 48.00% | 0.181 | IPR015880 (SMART); PF13912 (PFAM); IPR013087 (G3DSA:3.30.160.GENE3D); PF13894 (PFAM); IPR013087 (G3DSA:3.30.160.GENE3D); PF13465 (PFAM); PTHR24409 (PANTHER); PTHR24409:SF13 (PANTHER); IPR007087 (PROSITE_PATTERNS); IPR007087 (PROSITE_PATTERNS); IPR007087 (PROSITE_PATTERNS); IPR007087 (PROSITE_PATTERNS); IPR007087 (PROSITE_PROFILES); IPR007087 (PROSITE_PROFILES); IPR007087 (PROSITE_PROFILES); IPR007087 (PROSITE_PROFILES); IPR007087 (PROSITE_PROFILES); SSF57667 (SUPERFAMILY); SSF57667 (SUPERFAMILY); SSF57667 (SUPERFAMILY)      |
| 1242 | c29607_g1_i3_len_1456_path_1434_0_11_1446_12_191_1626_192_217_1652_218_1226_2661_1_227_1455_2        | 209 | zinc finger protein 569-like                                                | 478 | 9.78E-26 | 47.90% | 0.242 | IPR015880 (SMART); PF13465 (PFAM); IPR013087 (G3DSA:3.30.160.GENE3D); IPR013087 (G3DSA:3.30.160.GENE3D); IPR013087 (G3DSA:3.30.160.GENE3D); PF13912 (PFAM); PF13894 (PFAM); PTHR24409 (PANTHER); PTHR24409:SF13 (PANTHER); IPR007087 (PROSITE_PATTERNS); IPR007087 (PROSITE_PATTERNS); IPR007087 (PROSITE_PATTERNS); IPR007087 (PROSITE_PATTERNS); IPR007087 (PROSITE_PROFILES); IPR007087 (PROSITE_PROFILES); IPR007087 (PROSITE_PROFILES); IPR007087 (PROSITE_PROFILES); SSF57667 (SUPERFAMILY); SSF57667 (SUPERFAMILY); SSF57667 (SUPERFAMILY) |
| 1243 | c29608_g1_i1_len_2043_path_2414_0_661_3076_662_663_3078_664_1302_56_1303_1382_378_7_1383_1383_408_2  | 380 | serine threonine-protein phosphatase 2b catalytic subunit 2-like isoform x2 | 681 | 0        | 94.90% | 0.106 | IPR006186 (PRINTS); IPR006186 (SMART); IPR004843 (PFAM); IPR029052 (G3DSA:3.60.21.GENE3D); PTHR11668:SF186 (PANTHER); PTHR11668 (PANTHER); IPR006186 (PROSITE_PATTERNS); IPR029052 (SUPERFAMILY)                                                                                                                                                                                                                                                                                                                                                  |
| 1244 | c29621_g1_i1_len_2487_path_3451_0_309_3760_310_312_1338_313_1475_4921_1476_1496_4_942_1497_1524_0    | 497 | mucin-5b- partial                                                           | 824 | 5.77E-17 | 44.00% | 0.208 | IPR025155 (PFAM); TRANSMEMBRANE (PHOBIUS); NON_CYTOPLASMIC_DOMAIN (PHOBIUS); TRANSMEMBRANE (PHOBIUS); NON_CYTOPLASMIC_DOMAIN (PHOBIUS); CYTOPLASMIC_DOMAIN (PHOBIUS); TRANSMEMBRANE (PHOBIUS); CYTOPLASMIC_DOMAIN (PHOBIUS); TMhelix (TMHMM); TMhelix (TMHMM); TMhelix (TMHMM)                                                                                                                                                                                                                                                                    |



|      |                                                                                                        |     |                                                         |     |           |        |       |                                                                                                                                                                                                                                                                                                                                                                                                                                                                                                                                                                         |
|------|--------------------------------------------------------------------------------------------------------|-----|---------------------------------------------------------|-----|-----------|--------|-------|-------------------------------------------------------------------------------------------------------------------------------------------------------------------------------------------------------------------------------------------------------------------------------------------------------------------------------------------------------------------------------------------------------------------------------------------------------------------------------------------------------------------------------------------------------------------------|
| 1245 | c29622_g1_i1_len_2269_path_2475_0_235_4921_236_236_2711_237_1187_114_1188_1618_40_86_1619_2268_1       | 433 | u3 small nucleolar rna-interacting protein 2 isoform x2 | 752 | 1.45E-178 | 75.00% | 0.153 | Coil (COILS); IPR020472 (PRINTS); IPR001680 (SMART); IPR001680 (PFAM); IPR015943 (G3DSA:2.130.10.GENE3D); PTHR19865 (PANTHER); IPR019775 (PROSITE_PATTERNS); NON_CYTOPLASMIC_DOMAIN (PHOBIUS); CYTOPLASMIC_DOMAIN (PHOBIUS); TRANSMEMBRANE (PHOBIUS); IPR001680 (PROSITE_PROFILES); IPR001680 (PROSITE_PROFILES); IPR001680 (PROSITE_PROFILES); IPR001680 (PROSITE_PROFILES); IPR017986 (PROSITE_PROFILES); IPR001680 (PROSITE_PROFILES); IPR001680 (PROSITE_PROFILES); IPR017986 (SUPERFAMILY)                                                                         |
| 1246 | c29625_g2_i2_len_209_path_4476_0_112_8115_113_117_8120_118_137_8140_138_208_1                          | 0   | zinc finger protein partial                             | 70  | 2.94E-12  | 67.10% | 0.098 | IPR015880 (SMART); IPR013087 (G3DSA:3.30.160.GENE3D); IPR013087 (G3DSA:3.30.160.GENE3D); PF13894 (PFAM); PTHR24409:SF13 (PANTHER); PTHR24409 (PANTHER); IPR007087 (PROSITE_PATTERNS); IPR007087 (PROSITE_PATTERNS); IPR007087 (PROSITE_PROFILES); IPR007087 (PROSITE_PROFILES); SSF57667 (SUPERFAMILY)                                                                                                                                                                                                                                                                  |
| 1247 | c29625_g5_i1_len_308_path_267_0_51_6393_52_81_319_82_96_8107_97_104_8115_105_109_8_120_110_129_8147_2  | 3   | zinc finger protein 347-like                            | 102 | 1.72E-20  | 63.00% | 0.098 | IPR015880 (SMART); IPR013087 (G3DSA:3.30.160.GENE3D); IPR013087 (G3DSA:3.30.160.GENE3D); PF13894 (PFAM); PF13465 (PFAM); PTHR24409 (PANTHER); PTHR24409:SF13 (PANTHER); IPR007087 (PROSITE_PATTERNS); IPR007087 (PROSITE_PATTERNS); IPR007087 (PROSITE_PROFILES); IPR007087 (PROSITE_PROFILES); SSF57667 (SUPERFAMILY); SSF57667 (SUPERFAMILY); SSF57667 (SUPERFAMILY)                                                                                                                                                                                                  |
| 1248 | c29625_g5_i2_len_278_path_267_0_51_319_52_66_8107_67_74_8115_75_79_8120_80_99_8147_100_108_677_109_2   | 0   | zinc finger protein 135-like                            | 92  | 1.40E-15  | 56.80% | 0.098 | IPR015880 (SMART); IPR013087 (G3DSA:3.30.160.GENE3D); PF13465 (PFAM); IPR013087 (G3DSA:3.30.160.GENE3D); PTHR24409 (PANTHER); PTHR24409:SF14 (PANTHER); IPR007087 (PROSITE_PATTERNS); IPR007087 (PROSITE_PATTERNS); IPR007087 (PROSITE_PROFILES); IPR007087 (PROSITE_PROFILES); SSF57667 (SUPERFAMILY); SSF57667 (SUPERFAMILY); SSF57667 (SUPERFAMILY)                                                                                                                                                                                                                  |
| 1249 | c29640_g6_i1_len_1597_path_10897_0_408_241_8_409_492_2502_493_1518_3528_1519_1548_1_0480_1549_1596_1   | 68  | ras suppressor protein 1                                | 532 | 6.67E-156 | 87.60% | 0.099 | SM00364 (SMART); IPR003591 (SMART); IPR025875 (PFAM); IPR001611 (PFAM); G3DSA:3.80.10.10 (GENE3D); PTHR23155 (PANTHER); CYTOPLASMIC_DOMAIN (PHOBIUS); TRANSMEMBRANE (PHOBIUS); NON_CYTOPLASMIC_DOMAIN (PHOBIUS); TRANSMEMBRANE (PHOBIUS); CYTOPLASMIC_DOMAIN (PHOBIUS); IPR001611 (PROSITE_PROFILES); IPR001611 (PROSITE_PROFILES); IPR001611 (PROSITE_PROFILES); IPR001611 (PROSITE_PROFILES); IPR001611 (PROSITE_PROFILES); SSF52058 (SUPERFAMILY); TMhelix (TMHMM); TMhelix (TMHMM)                                                                                  |
| 1250 | c29642_g1_i1_len_2058_path_1_0_109_111_110_343_345_344_363_365_364_559_4401_560_68_5_561_686_2057_5    | 822 | protein tumorous imaginal mitochondrial-like isoform x2 | 679 | 0         | 75.00% | 0.188 | IPR001623 (PRINTS); IPR001623 (SMART); IPR001305 (PFAM); IPR001623 (G3DSA:1.10.287.GENE3D); G3DSA:2.60.260.20 (GENE3D); IPR001305 (G3DSA:2.10.230.GENE3D); IPR002939 (PFAM); IPR001623 (PFAM); PTHR24076 (PANTHER); PTHR24076:SF79 (PANTHER); IPR018253 (PROSITE_PATTERNS); NON_CYTOPLASMIC_DOMAIN (PHOBIUS); TRANSMEMBRANE (PHOBIUS); CYTOPLASMIC_DOMAIN (PHOBIUS); IPR012724 (HAMAP); IPR001623 (PROSITE_PROFILES); IPR001305 (PROSITE_PROFILES); IPR001623 (SUPERFAMILY); IPR008971 (SUPERFAMILY); IPR008971 (SUPERFAMILY); IPR001305 (SUPERFAMILY); TMhelix (TMHMM) |
| 1251 | c29642_g1_i2_len_2122_path_1_0_109_111_110_343_345_344_363_365_364_559_4337_560_62_3_4401_624_749_56_5 | 754 | protein tumorous imaginal mitochondrial-like isoform x2 | 701 | 0         | 75.00% | 0.188 | IPR001623 (PRINTS); IPR001623 (SMART); G3DSA:2.60.260.20 (GENE3D); IPR002939 (PFAM); IPR001305 (PFAM); IPR001623 (PFAM); IPR001623 (G3DSA:1.10.287.GENE3D); IPR001305 (G3DSA:2.10.230.GENE3D); PTHR24076 (PANTHER); PTHR24076:SF79 (PANTHER); IPR018253 (PROSITE_PATTERNS); CYTOPLASMIC_DOMAIN (PHOBIUS); TRANSMEMBRANE (PHOBIUS); NON_CYTOPLASMIC_DOMAIN (PHOBIUS); IPR012724 (HAMAP); IPR001305 (PROSITE_PROFILES); IPR001305 (PROSITE_PROFILES); IPR008971 (SUPERFAMILY); IPR001623 (SUPERFAMILY); IPR001305 (SUPERFAMILY); IPR008971 (SUPERFAMILY); TMhelix (TMHMM) |

|      |                                                                                                        |     |                                                         |     |           |        |       |                                                                                                                                                                                                                                                                                                                                                                                                                                                                                                                                                                                                                                                                                      |
|------|--------------------------------------------------------------------------------------------------------|-----|---------------------------------------------------------|-----|-----------|--------|-------|--------------------------------------------------------------------------------------------------------------------------------------------------------------------------------------------------------------------------------------------------------------------------------------------------------------------------------------------------------------------------------------------------------------------------------------------------------------------------------------------------------------------------------------------------------------------------------------------------------------------------------------------------------------------------------------|
| 1252 | c29642_g1_i3_len_1932_path_1_0_109_111_110_343_345_344_363_365_364_559_561_560_193_1_5                 | 893 | protein tumorous imaginal mitochondrial-like isoform x2 | 637 | 0         | 75.00% | 0.188 | IPR001623 (PRINTS); IPR001623 (SMART); IPR001623 (PFAM); IPR001305 (G3DSA:2.10.230.GENE3D); IPR001305 (PFAM); G3DSA:2.60.260.20 (GENE3D); IPR002939 (PFAM); IPR001623 (G3DSA:1.10.287.GENE3D); PTHR24076 (PANTHER); PTHR24076:SF79 (PANTHER); IPR018253 (PROSITE_PATTERNS); NON_CYTOPLASMIC_DOMAIN (PHOBIUS); CYTOPLASMIC_DOMAIN (PHOBIUS); TRANSMEMBRANE (PHOBIUS); IPR001305 (PROSITE_PROFILES); IPR012724 (HAMAP); IPR001623 (PROSITE_PROFILES); IPR001623 (SUPERFAMILY); IPR008971 (SUPERFAMILY); IPR001305 (SUPERFAMILY); IPR008971 (SUPERFAMILY); TMhelix (TMHMM)                                                                                                              |
| 1253 | c29649_g1_i1_len_2027_path_3271_0_123_3394_124_716_130_717_2026_0                                      | 266 | ankyrin-1-like isoform x2                               | 676 | 0         | 80.30% | 0.154 | IPR002110 (PRINTS); IPR001496 (SMART); IPR001496 (SMART); IPR002110 (SMART); IPR001496 (PFAM); IPR020683 (PFAM); IPR020683 (G3DSA:1.25.40.GENE3D); IPR020683 (G3DSA:1.25.40.GENE3D); IPR020683 (G3DSA:1.25.40.GENE3D); IPR002110 (PFAM); PTHR24133 (PANTHER); TRANSMEMBRANE (PHOBIUS); CYTOPLASMIC_DOMAIN (PHOBIUS); NON_CYTOPLASMIC_DOMAIN (PHOBIUS); IPR002110 (PROSITE_PROFILES); IPR020683 (PROSITE_PROFILES); IPR002110 (PROSITE_PROFILES); IPR001496 (PROSITE_PROFILES); IPR002110 (PROSITE_PROFILES); IPR002110 (PROSITE_PROFILES); IPR002110 (PROSITE_PROFILES); IPR020683 (SUPERFAMILY); SSF158235 (SUPERFAMILY); IPR020683 (SUPERFAMILY); TMhelix (TMHMM); TMhelix (TMHMM) |
| 1254 | c29664_g2_i4_len_1312_path_1759_0_878_1356_1_879_879_2636_880_1311_2                                   | 39  | syntaxin-12                                             | 437 | 1.69E-96  | 72.40% | 0.103 | IPR006011 (SMART); IPR000727 (SMART); G3DSA:1.20.58.70 (GENE3D); PF14523 (PFAM); IPR000727 (PFAM); PTHR19957:SF87 (PANTHER); PTHR19957 (PANTHER); IPR006012 (PROSITE_PATTERNS); TRANSMEMBRANE (PHOBIUS); TRANSMEMBRANE (PHOBIUS); CYTOPLASMIC_DOMAIN (PHOBIUS); CYTOPLASMIC_DOMAIN (PHOBIUS); NON_CYTOPLASMIC_DOMAIN (PHOBIUS); IPR000727 (PROSITE_PROFILES); IPR010989 (SUPERFAMILY); TMhelix (TMHMM); TMhelix (TMHMM)                                                                                                                                                                                                                                                              |
| 1255 | c29664_g2_i5_len_1026_path_1759_0_878_1356_1_879_879_1414_880_930_9820_931_961_459_0_962_967_9856_2    | 15  | syntaxin-12                                             | 342 | 1.38E-97  | 72.50% | 0.103 | IPR006011 (SMART); IPR000727 (SMART); PF14523 (PFAM); IPR000727 (PFAM); G3DSA:1.20.58.70 (GENE3D); PTHR19957:SF87 (PANTHER); PTHR19957 (PANTHER); IPR006012 (PROSITE_PATTERNS); NON_CYTOPLASMIC_DOMAIN (PHOBIUS); TRANSMEMBRANE (PHOBIUS); CYTOPLASMIC_DOMAIN (PHOBIUS); IPR000727 (PROSITE_PROFILES); IPR010989 (SUPERFAMILY); TMhelix (TMHMM)                                                                                                                                                                                                                                                                                                                                      |
| 1256 | c29667_g1_i1_len_1036_path_51_0_55_107_56_72_2891_73_76_2895_77_182_234_183_446_49_8_447_693_744_694_4 | 150 | peroxiredoxin partial                                   | 345 | 5.68E-116 | 83.50% | 0.141 | G3DSA:3.30.1020.10 (GENE3D); IPR012336 (G3DSA:3.40.30.GENE3D); IPR019479 (PFAM); IPR000866 (PFAM); PTHR10681:SF77 (PANTHER); PTHR10681 (PANTHER); TRANSMEMBRANE (PHOBIUS); CYTOPLASMIC_DOMAIN (PHOBIUS); NON_CYTOPLASMIC_DOMAIN (PHOBIUS); IPR012336 (PROSITE_PROFILES); IPR012336 (SUPERFAMILY); TMhelix (TMHMM)                                                                                                                                                                                                                                                                                                                                                                    |
| 1257 | c29676_g1_i1_len_2725_path_483_0_52_377_53_55_380_56_1224_1700_1225_1226_430_1227_1765_154_1766_2      | 920 | heat shock 70 kda protein cognate 5                     | 908 | 0         | 89.00% | 0.127 | Coil (COILS); IPR013126 (PRINTS); IPR029048 (G3DSA:1.20.1270.GENE3D); G3DSA:3.30.420.40 (GENE3D); IPR012725 (TIGRFAM); G3DSA:3.30.420.40 (GENE3D); G3DSA:3.90.640.10 (GENE3D); IPR029047 (G3DSA:2.60.34.GENE3D); G3DSA:3.30.30.30 (GENE3D); IPR013126 (PFAM); PTHR19375 (PANTHER); PTHR19375:SF173 (PANTHER); IPR018181 (PROSITE_PATTERNS); IPR018181 (PROSITE_PATTERNS); IPR018181 (PROSITE_PATTERNS); IPR012725 (HAMAP); SSF53067 (SUPERFAMILY); IPR029047 (SUPERFAMILY); SSF53067 (SUPERFAMILY)                                                                                                                                                                                   |
| 1258 | c29682_g2_i1_len_822_path_1895_0_477_2373_478_482_2378_483_667_172_668_701_2596_70_2_727_172_728_761_1 | 874 | ---NA---                                                | 274 |           |        | 0.172 | no IPS match                                                                                                                                                                                                                                                                                                                                                                                                                                                                                                                                                                                                                                                                         |
| 1259 | c29703_g1_i3_len_2089_path_645_0_1243_644_1244_1396_328_1397_1476_408_1477_1478_20_35_1479_1842_4920_4 | 456 | hypothetical protein L798_04491                         | 690 | 6.64E-34  | 62.20% | 0.128 | IPR013783 (G3DSA:2.60.40.GENE3D); PTHR21104 (PANTHER); TRANSMEMBRANE (PHOBIUS); NON_CYTOPLASMIC_DOMAIN (PHOBIUS); CYTOPLASMIC_DOMAIN (PHOBIUS); CYTOPLASMIC_DOMAIN (PHOBIUS); TRANSMEMBRANE (PHOBIUS); CYTOPLASMIC_DOMAIN (PHOBIUS); NON_CYTOPLASMIC_DOMAIN (PHOBIUS); CYTOPLASMIC_DOMAIN (PHOBIUS); NON_CYTOPLASMIC_DOMAIN (PHOBIUS); TRANSMEMBRANE (PHOBIUS); TRANSMEMBRANE (PHOBIUS); TRANSMEMBRANE (PHOBIUS); IPR003961 (SUPERFAMILY); TMhelix (TMHMM); TMhelix (TMHMM); TMhelix (TMHMM); TMhelix (TMHMM)                                                                                                                                                                        |

|      |                                                                                                       |     |                                                                       |     |          |        |       |                                                                                                                                                                                                                                                                                                                                                                                                                                                                                                                                                                                                        |
|------|-------------------------------------------------------------------------------------------------------|-----|-----------------------------------------------------------------------|-----|----------|--------|-------|--------------------------------------------------------------------------------------------------------------------------------------------------------------------------------------------------------------------------------------------------------------------------------------------------------------------------------------------------------------------------------------------------------------------------------------------------------------------------------------------------------------------------------------------------------------------------------------------------------|
| 1260 | c29703_g1_i4_len_2137_path_645_0_1243_596_1244_1291_644_1292_1444_328_1445_1524_408_1525_1526_2035_4  | 424 | hypothetical protein L798_04491                                       | 706 | 7.69E-34 | 62.20% | 0.128 | IPR013783 (G3DSA:2.60.40.GENE3D); PTHR21104 (PANTHER); CYTOPLASMIC_DOMAIN (PHOBIUS); TRANSMEMBRANE (PHOBIUS); CYTOPLASMIC_DOMAIN (PHOBIUS); NON_CYTOPLASMIC_DOMAIN (PHOBIUS); TRANSMEMBRANE (PHOBIUS); CYTOPLASMIC_DOMAIN (PHOBIUS); TRANSMEMBRANE (PHOBIUS); NON_CYTOPLASMIC_DOMAIN (PHOBIUS); NON_CYTOPLASMIC_DOMAIN (PHOBIUS); CYTOPLASMIC_DOMAIN (PHOBIUS); TRANSMEMBRANE (PHOBIUS); IPR003961 (SUPERFAMILY); TMhelix (TMHMM); TMhelix (TMHMM); TMhelix (TMHMM); TMhelix (TMHMM);                                                                                                                  |
| 1261 | c29703_g1_i5_len_2009_path_645_0_1243_644_1244_1396_408_1397_1398_2035_1399_1762_4920_1763_1765_239_5 | 525 | hypothetical protein L798_04491                                       | 663 | 6.44E-34 | 63.40% | 0.112 | IPR003961 (SMART); IPR003961 (PFAM); IPR013783 (G3DSA:2.60.40.GENE3D); PTHR21104 (PANTHER); CYTOPLASMIC_DOMAIN (PHOBIUS); CYTOPLASMIC_DOMAIN (PHOBIUS); NON_CYTOPLASMIC_DOMAIN (PHOBIUS); TRANSMEMBRANE (PHOBIUS); NON_CYTOPLASMIC_DOMAIN (PHOBIUS); TRANSMEMBRANE (PHOBIUS); TRANSMEMBRANE (PHOBIUS); CYTOPLASMIC_DOMAIN (PHOBIUS); TRANSMEMBRANE (PHOBIUS); NON_CYTOPLASMIC_DOMAIN (PHOBIUS); TRANSMEMBRANE (PHOBIUS); IPR003961 (PROSITE_PROFILES); IPR003961 (SUPERFAMILY); TMhelix (TMHMM); TMhelix (TMHMM); TMhelix (TMHMM);                                                                     |
| 1262 | c29713_g2_i1_len_957_path_1_0_197_199_198_956_0                                                       | 77  | ankyrin sam and basic leucine zipper domain-containing protein 1-like | 319 | 3.01E-63 | 68.40% | 0.099 | IPR002110 (SMART); IPR020683 (G3DSA:1.25.40.GENE3D); IPR020683 (PFAM); PTHR24157 (PANTHER); IPR002110 (PROSITE_PROFILES); IPR002110 (PROSITE_PROFILES); IPR020683 (PROSITE_PROFILES); IPR002110 (PROSITE_PROFILES); IPR020683 (SUPERFAMILY)                                                                                                                                                                                                                                                                                                                                                            |
| 1263 | c29718_g2_i1_len_598_path_940_0_169_1110_170_334_1603_335_409_7335_410_450_7376_451_527_2627_528_55_2 | 174 | si:dkey- protein                                                      | 199 | 4.47E-21 | 61.60% | 0.16  | PF14704 (PFAM); IPR026645 (PANTHER); NON_CYTOPLASMIC_DOMAIN (PHOBIUS); TRANSMEMBRANE (PHOBIUS); CYTOPLASMIC_DOMAIN (PHOBIUS); TMhelix (TMHMM); TMhelix (TMHMM)                                                                                                                                                                                                                                                                                                                                                                                                                                         |
| 1264 | c29718_g2_i2_len_449_path_3681_0_45_2760_46_99_2395_100_124_7784_125_185_1603_186_260_7917_261_301_0  | 300 | dermatopontin 3                                                       | 150 | 2.19E-21 | 62.10% | 0.203 | PF14704 (PFAM); IPR026645 (PANTHER); TRANSMEMBRANE (PHOBIUS); NON_CYTOPLASMIC_DOMAIN (PHOBIUS); CYTOPLASMIC_DOMAIN (PHOBIUS); TMhelix (TMHMM)                                                                                                                                                                                                                                                                                                                                                                                                                                                          |
| 1265 | c29718_g2_i3_len_446_path_1421_0_17_1110_18_182_1603_183_257_7335_258_298_7376_299_375_2627_376_404_0 | 184 | si:dkey- protein                                                      | 149 | 9.40E-22 | 60.80% | 0.18  | PF14704 (PFAM); IPR026645 (PANTHER); CYTOPLASMIC_DOMAIN (PHOBIUS); NON_CYTOPLASMIC_DOMAIN (PHOBIUS); TRANSMEMBRANE (PHOBIUS); TMhelix (TMHMM)                                                                                                                                                                                                                                                                                                                                                                                                                                                          |
| 1266 | c29718_g3_i1_len_870_path_2295_0_99_2395_100_124_3803_125_288_3967_289_363_3661_364_399_4075_400_42_0 | 524 | hemagglutinin amebocyte aggregation factor-like                       | 285 | 4.11E-39 | 61.70% | 0.282 | PF14704 (PFAM); IPR026645 (PANTHER); NON_CYTOPLASMIC_DOMAIN (PHOBIUS); CYTOPLASMIC_DOMAIN (PHOBIUS); TRANSMEMBRANE (PHOBIUS); NON_CYTOPLASMIC_DOMAIN (PHOBIUS); TMhelix (TMHMM)                                                                                                                                                                                                                                                                                                                                                                                                                        |
| 1267 | c29718_g4_i2_len_1564_path_3803_0_163_7152_164_274_4075_275_302_4102_303_853_2548_854_1563_1          | 243 | dermatopontin 2                                                       | 515 | 1.12E-35 | 59.20% | 0.112 | PF14704 (PFAM); IPR026645 (PANTHER)                                                                                                                                                                                                                                                                                                                                                                                                                                                                                                                                                                    |
| 1268 | c29718_g5_i1_len_175_path_1291_0_129_363_130_174_4                                                    | 0   | hemagglutinin amebocyte aggregation factor-like                       | 58  | 2.47E-12 | 66.50% | 0.151 | PF14704 (PFAM); IPR026645 (PANTHER)                                                                                                                                                                                                                                                                                                                                                                                                                                                                                                                                                                    |
| 1269 | c29718_g6_i1_len_407_path_1_0_361_363_362_406_4                                                       | 191 | hemagglutinin amebocyte aggregation factor-like                       | 128 | 1.18E-14 | 66.40% | 0.132 | PF14704 (PFAM); IPR026645 (PANTHER); TRANSMEMBRANE (PHOBIUS); NON_CYTOPLASMIC_DOMAIN (PHOBIUS); CYTOPLASMIC_DOMAIN (PHOBIUS); CYTOPLASMIC_DOMAIN (PHOBIUS); TRANSMEMBRANE (PHOBIUS); TMhelix (TMHMM); TMhelix (TMHMM)                                                                                                                                                                                                                                                                                                                                                                                  |
| 1270 | c29733_g1_i1_len_2204_path_2899_0_1320_422_0_1321_1336_4236_1337_1947_4847_1948_1974_7583_1975_1980_1 | 427 | contactin associated protein 1                                        | 735 | 5.72E-69 | 51.50% | 0.138 | Coil (COILS); IPR001073 (SMART); IPR008983 (G3DSA:2.60.120.GENE3D); IPR000885 (PFAM); IPR001073 (PFAM); IPR014716 (G3DSA:3.90.215.GENE3D); PTHR10127:SF575 (PANTHER); PTHR10127 (PANTHER); TRANSMEMBRANE (PHOBIUS); TRANSMEMBRANE (PHOBIUS); CYTOPLASMIC_DOMAIN (PHOBIUS); TRANSMEMBRANE (PHOBIUS); NON_CYTOPLASMIC_DOMAIN (PHOBIUS); CYTOPLASMIC_DOMAIN (PHOBIUS); NON_CYTOPLASMIC_DOMAIN (PHOBIUS); TRANSMEMBRANE (PHOBIUS); IPR001073 (PROSITE_PROFILES); IPR002181 (PROSITE_PROFILES); IPR002181 (SUPERFAMILY); IPR008983 (SUPERFAMILY); IPR002181 (SUPERFAMILY); TMhelix (TMHMM); TMhelix (TMHMM) |



|      |                                                                                                        |      |                                                       |     |           |        |         |                                                                                                                                                                                                                                                                                                                                                                                                                                                                                                                                                                                                                                                                                                                                                                                                                                                                       |
|------|--------------------------------------------------------------------------------------------------------|------|-------------------------------------------------------|-----|-----------|--------|---------|-----------------------------------------------------------------------------------------------------------------------------------------------------------------------------------------------------------------------------------------------------------------------------------------------------------------------------------------------------------------------------------------------------------------------------------------------------------------------------------------------------------------------------------------------------------------------------------------------------------------------------------------------------------------------------------------------------------------------------------------------------------------------------------------------------------------------------------------------------------------------|
| 1278 | c29759_g2_i1_len_1563_path_2227_0_793_626_794_1036_554_1037_1180_3440_1181_1181_528_1182_1552_4457_2   | 200  | zinc finger and scan domain-containing protein 2-like | 521 | 9.70E-23  | 55.40% | 0.102   | IPR015880 (SMART); IPR013087 (G3DSA:3.30.160.GENE3D); IPR007087 (PFAM); PF13894 (PFAM); PF13465 (PFAM); PTHR24409 (PANTHER); PTHR24409:SF14 (PANTHER); IPR007087 (PROSITE_PATTERNS); IPR007087 (PROSITE_PATTERNS); IPR007087 (PROSITE_PATTERNS); IPR007087 (PROSITE_PATTERNS); IPR007087 (PROSITE_PROFILES); IPR007087 (PROSITE_PROFILES); IPR007087 (PROSITE_PROFILES); IPR007087 (PROSITE_PROFILES); IPR007087 (PROSITE_PROFILES); SSF57667 (SUPERFAMILY); SSF57667 (SUPERFAMILY)                                                                                                                                                                                                                                                                                                                                                                                   |
| 1279 | c29759_g2_i2_len_1611_path_2227_0_793_3014_794_841_626_842_1084_554_1085_1228_3440_1229_1229_528_12_2  | 234  | zinc finger protein 235-like                          | 537 | 8.40E-23  | 52.50% | 0.102   | IPR015880 (SMART); IPR007087 (PFAM); IPR013087 (G3DSA:3.30.160.GENE3D); PF13465 (PFAM); PF13894 (PFAM); PTHR24409 (PANTHER); PTHR24409:SF14 (PANTHER); IPR007087 (PROSITE_PATTERNS); IPR007087 (PROSITE_PATTERNS); IPR007087 (PROSITE_PATTERNS); IPR007087 (PROSITE_PATTERNS); IPR007087 (PROSITE_PROFILES); IPR007087 (PROSITE_PROFILES); IPR007087 (PROSITE_PROFILES); IPR007087 (PROSITE_PROFILES); SSF57667 (SUPERFAMILY); SSF57667 (SUPERFAMILY)                                                                                                                                                                                                                                                                                                                                                                                                                 |
| 1280 | c29780_g6_i1_len_1532_path_24313_0_37_2435_0_38_53_24366_54_1060_14426_1061_1329_25_758_1330_1531_1    | 444  | zinc finger protein zpr1                              | 503 | 0         | 74.20% | 0.123   | IPR004457 (SMART); IPR004457 (TIGRFAM); IPR004457 (PFAM); PTHR10876 (PANTHER); PTHR10876:SF0 (PANTHER)                                                                                                                                                                                                                                                                                                                                                                                                                                                                                                                                                                                                                                                                                                                                                                |
| 1281 | c29780_g6_i2_len_716_path_19643_0_12_28759_13_23_28770_24_36_14263_37_199_14426_20_0_468_22085_469_7_1 | 10   | zinc finger protein partial                           | 239 | 7.09E-26  | 73.20% | 0.113   | IPR004457 (SMART); IPR004457 (PFAM); PTHR10876 (PANTHER); PTHR10876:SF0 (PANTHER); TRANSMEMBRANE (PHOBIUS); NON_CYTOPLASMIC_DOMAIN (PHOBIUS); CYTOPLASMIC_DOMAIN (PHOBIUS)                                                                                                                                                                                                                                                                                                                                                                                                                                                                                                                                                                                                                                                                                            |
| 1282 | c29795_g1_i3_len_269_path_130_0_21_152_22_245_5983_246_268_2                                           | 4    | serine protease inhibitor serpin-like protein         | 89  | 3.03E-08  | 72.20% | 0.22    | G3DSA:2.30.39.10 (GENE3D); IPR023796 (PFAM); IPR000215 (PANTHER); PTHR11461:SF52 (PANTHER); IPR023795 (PROSITE_PATTERNS); IPR023796 (SUPERFAMILY)                                                                                                                                                                                                                                                                                                                                                                                                                                                                                                                                                                                                                                                                                                                     |
| 1283 | c29808_g1_i1_len_1381_path_2895_0_122_3018_123_208_1358_209_209_1359_210_216_1366_217_271_1421_272_2   | 268  | copper chaperone for superoxide dismutase             | 455 | 2.81E-111 | 77.00% | 0.434 Y | IPR001424 (PRINTS); IPR001424 (PFAM); IPR006121 (PFAM); IPR001424 (G3DSA:2.60.40.GENE3D); G3DSA:3.30.70.100 (GENE3D); PTHR10003 (PANTHER); IPR018152 (PROSITE_PATTERNS); SIGNAL_PEPTIDE (PHOBIUS); TRANSMEMBRANE (PHOBIUS); SIGNAL_PEPTIDE_N_REGION (PHOBIUS); CYTOPLASMIC_DOMAIN (PHOBIUS); SIGNAL_PEPTIDE_H_REGION (PHOBIUS); SIGNAL_PEPTIDE_C_REGION (PHOBIUS); NON_CYTOPLASMIC_DOMAIN (PHOBIUS); IPR006121 (PROSITE_PROFILES); IPR001424 (SUPERFAMILY); IPR006121 (SUPERFAMILY)                                                                                                                                                                                                                                                                                                                                                                                   |
| 1284 | c29808_g1_i2_len_1280_path_1250_0_107_1358_108_108_1359_109_115_1366_116_170_1421_171_202_1421_203_0   | 322  | copper chaperone for superoxide dismutase             | 422 | 8.25E-112 | 77.00% | 0.17    | IPR001424 (PRINTS); IPR001424 (G3DSA:2.60.40.GENE3D); IPR006121 (PFAM); IPR001424 (PFAM); G3DSA:3.30.70.100 (GENE3D); PTHR10003 (PANTHER); IPR018152 (PROSITE_PATTERNS); TRANSMEMBRANE (PHOBIUS); NON_CYTOPLASMIC_DOMAIN (PHOBIUS); CYTOPLASMIC_DOMAIN (PHOBIUS); IPR006121 (PROSITE_PROFILES); IPR001424 (SUPERFAMILY); IPR006121 (SUPERFAMILY)                                                                                                                                                                                                                                                                                                                                                                                                                                                                                                                      |
| 1285 | c29820_g1_i2_len_2316_path_669_0_449_1118_450_452_272_453_643_176_644_730_341_731_933_1590_934_948_1   | 214  | serine protease nudel                                 | 772 | 2.97E-40  | 51.40% | 0.126   | IPR002172 (PRINTS); IPR002172 (SMART); IPR002172 (G3DSA:4.10.400.GENE3D); IPR002172 (G3DSA:4.10.400.GENE3D); IPR002172 (PFAM); IPR002172 (G3DSA:4.10.400.GENE3D); IPR002172 (G3DSA:4.10.400.GENE3D); PTHR10529 (PANTHER); PTHR10529:SF222 (PANTHER); IPR023415 (PROSITE_PATTERNS); IPR023415 (PROSITE_PATTERNS); IPR023415 (PROSITE_PATTERNS); IPR023415 (PROSITE_PATTERNS); NON_CYTOPLASMIC_DOMAIN (PHOBIUS); NON_CYTOPLASMIC_DOMAIN (PHOBIUS); TRANSMEMBRANE (PHOBIUS); TRANSMEMBRANE (PHOBIUS); TRANSMEMBRANE (PHOBIUS); CYTOPLASMIC_DOMAIN (PHOBIUS); CYTOPLASMIC_DOMAIN (PHOBIUS); IPR002172 (PROSITE_PROFILES); IPR002172 (PROSITE_PROFILES); IPR002172 (PROSITE_PROFILES); IPR001190 (PROSITE_PROFILES); IPR002172 (SUPERFAMILY); IPR017448 (SUPERFAMILY); IPR002172 (SUPERFAMILY); IPR002172 (SUPERFAMILY); TMhelix (TMHMM); TMhelix (TMHMM); TMhelix (TMHMM) |
| 1286 | c29824_g1_i1_len_2478_path_2781_0_1658_443_7_1659_1865_100_1866_1966_4742_1967_1971_254_1972_2006_47_0 | 1131 | extracellular matrix protein partial                  | 820 | 5.62E-22  | 40.10% | 0.106   | NON_CYTOPLASMIC_DOMAIN (PHOBIUS); TRANSMEMBRANE (PHOBIUS); CYTOPLASMIC_DOMAIN (PHOBIUS); IPR006207 (PROSITE_PROFILES); IPR001007 (PROSITE_PROFILES); TMhelix (TMHMM)                                                                                                                                                                                                                                                                                                                                                                                                                                                                                                                                                                                                                                                                                                  |



|      |                                                                                                        |         |                                            |      |           |        |       |                                                                                                                                                                                                                                                                                                                                                                                                                                                                                                                                                                                                                                                                                                                                                                    |
|------|--------------------------------------------------------------------------------------------------------|---------|--------------------------------------------|------|-----------|--------|-------|--------------------------------------------------------------------------------------------------------------------------------------------------------------------------------------------------------------------------------------------------------------------------------------------------------------------------------------------------------------------------------------------------------------------------------------------------------------------------------------------------------------------------------------------------------------------------------------------------------------------------------------------------------------------------------------------------------------------------------------------------------------------|
| 1287 | c29825_g1_i2_len_785_path_4447_0_73_5560_7_4_91_5578_92_109_54_110_133_3098_134_234_1718_235_784_1     | 40      | platelet-activating factor acetylhydrolase | 262  | 4.81E-41  | 59.90% | 0.156 | IPR005065 (PFAM); IPR029058 (G3DSA:3.40.50.GENE3D); IPR005065 (PANTHER); NON_CYTOPLASMIC_DOMAIN (PHOBIUS); TRANSMEMBRANE (PHOBIUS); CYTOPLASMIC_DOMAIN (PHOBIUS); IPR029058 (SUPERFAMILY); TMhelix (TMHMM)                                                                                                                                                                                                                                                                                                                                                                                                                                                                                                                                                         |
| 1288 | c29825_g1_i3_len_1480_path_1618_0_99_1718_100_649_5704_650_1287_2906_1288_1479_1                       | 497     | platelet-activating factor acetylhydrolase | 487  | 2.00E-102 | 57.20% | 0.192 | Coil (COILS); IPR005065 (PFAM); IPR029058 (G3DSA:3.40.50.GENE3D); IPR005065 (PANTHER); IPR029058 (SUPERFAMILY)                                                                                                                                                                                                                                                                                                                                                                                                                                                                                                                                                                                                                                                     |
| 1289 | c29835_g2_i1_len_868_path_10807_0_867_3                                                                | 780     | glutathione peroxidase 7                   | 290  | 1.53E-75  | 70.60% | 0.251 | IPR000889 (PRINTS); IPR000889 (PFAM); IPR012336 (G3DSA:3.40.30.GENE3D); PTHR11592:SF10 (PANTHER); IPR000889 (PANTHER); IPR029760 (PROSITE_PATTERNS); IPR029759 (PROSITE_PATTERNS); TRANSMEMBRANE (PHOBIUS); NON_CYTOPLASMIC_DOMAIN (PHOBIUS); CYTOPLASMIC_DOMAIN (PHOBIUS); IPR000889 (PROSITE_PROFILES); IPR012336 (SUPERFAMILY); TMhelix (TMHMM)                                                                                                                                                                                                                                                                                                                                                                                                                 |
| 1290 | c29839_g1_i1_len_1703_path_852_0_820_1665_821_1269_2109_1270_1270_633_1271_1279_21_18_1280_1702_2      | 7378101 | probable chitinase 3                       | 567  | 3.86E-128 | 56.90% | 0.21  | IPR002557 (SMART); IPR011583 (SMART); IPR002557 (G3DSA:2.170.140.GENE3D); IPR013781 (G3DSA:3.20.20.GENE3D); IPR029070 (G3DSA:3.10.50.GENE3D); IPR002557 (PFAM); IPR001223 (PFAM); PTHR11177:SF112 (PANTHER); PTHR11177 (PANTHER); IPR001579 (PROSITE_PATTERNS); SIGNAL_PEPTIDE_H_REGION (PHOBIUS); SIGNAL_PEPTIDE (PHOBIUS); NON_CYTOPLASMIC_DOMAIN (PHOBIUS); SIGNAL_PEPTIDE_N_REGION (PHOBIUS); SIGNAL_PEPTIDE_C_REGION (PHOBIUS); IPR002557 (PROSITE_PROFILES); IPR017853 (SUPERFAMILY); IPR029070 (SUPERFAMILY); IPR002557 (SUPERFAMILY)                                                                                                                                                                                                                       |
| 1291 | c29848_g1_i1_len_256_path_1_0_255_0                                                                    | 0       | villin-1-like isoform x1                   | 86   | 5.89E-26  | 69.80% | 0.1   | IPR029006 (G3DSA:3.40.20.GENE3D); IPR007122 (PANTHER); IPR030016 (PTHR11977:PANTHER); SSF82754 (SUPERFAMILY)                                                                                                                                                                                                                                                                                                                                                                                                                                                                                                                                                                                                                                                       |
| 1292 | c29848_g2_i1_len_1628_path_2640_0_790_4272_791_797_498_798_1120_706_1121_1161_3793_1162_1172_1004_1_0  | 245     | villin-1-like isoform x1                   | 543  | 4.78E-146 | 66.00% | 0.102 | IPR007122 (PRINTS); IPR007122 (SMART); IPR003128 (SMART); IPR029006 (G3DSA:3.40.20.GENE3D); IPR003128 (G3DSA:1.10.950.GENE3D); IPR003128 (PFAM); IPR007123 (PFAM); IPR029006 (G3DSA:3.40.20.GENE3D); IPR029006 (G3DSA:3.40.20.GENE3D); IPR007122 (PANTHER); CYTOPLASMIC_DOMAIN (PHOBIUS); TRANSMEMBRANE (PHOBIUS); NON_CYTOPLASMIC_DOMAIN (PHOBIUS); IPR003128 (PROSITE_PROFILES); SSF55753 (SUPERFAMILY); SSF55753 (SUPERFAMILY); IPR003128 (SUPERFAMILY); TMhelix (TMHMM)                                                                                                                                                                                                                                                                                        |
| 1293 | c29849_g1_i1_len_3440_path_3560_0_2646_760_6_2647_2648_6207_2649_2651_6210_2652_280_2_7650_2803_2804_1 | 512     | retinoid-inducible serine carboxypeptidase | 1141 | 7.13E-141 | 67.40% | 0.12  | IPR001563 (PRINTS); IPR001563 (PFAM); IPR029058 (G3DSA:3.40.50.GENE3D); PTHR11802:SF3 (PANTHER); IPR001563 (PANTHER); IPR018202 (PROSITE_PATTERNS); CYTOPLASMIC_DOMAIN (PHOBIUS); CYTOPLASMIC_DOMAIN (PHOBIUS); TRANSMEMBRANE (PHOBIUS); TRANSMEMBRANE (PHOBIUS); NON_CYTOPLASMIC_DOMAIN (PHOBIUS); NON_CYTOPLASMIC_DOMAIN (PHOBIUS); TRANSMEMBRANE (PHOBIUS); NON_CYTOPLASMIC_DOMAIN (PHOBIUS); CYTOPLASMIC_DOMAIN (PHOBIUS); TRANSMEMBRANE (PHOBIUS); NON_CYTOPLASMIC_DOMAIN (PHOBIUS); TRANSMEMBRANE (PHOBIUS); TRANSMEMBRANE (PHOBIUS); TRANSMEMBRANE (PHOBIUS); IPR029058 (SUPERFAMILY); TMhelix (TMHMM); TMhelix (TMHMM); TMhelix (TMHMM); TMhelix (TMHMM)                                                                                                   |
| 1294 | c29862_g1_i1_len_2594_path_4016_0_154_6926_155_211_4228_212_235_7006_236_320_4331_321_373_752_374_4_5  | 108     | zinc finger protein 699-like               | 858  | 1.92E-32  | 55.00% | 0.11  | IPR015880 (SMART); IPR007087 (PFAM); PF13894 (PFAM); IPR013087 (G3DSA:3.30.160.GENE3D); PF13465 (PFAM); IPR013087 (G3DSA:3.30.160.GENE3D); PTHR24409:SF14 (PANTHER); PTHR24409 (PANTHER); IPR007087 (PROSITE_PATTERNS); IPR007087 (PROSITE_PATTERNS); IPR007087 (PROSITE_PATTERNS); IPR007087 (PROSITE_PATTERNS); IPR007087 (PROSITE_PATTERNS); NON_CYTOPLASMIC_DOMAIN (PHOBIUS); CYTOPLASMIC_DOMAIN (PHOBIUS); NON_CYTOPLASMIC_DOMAIN (PHOBIUS); TRANSMEMBRANE (PHOBIUS); TRANSMEMBRANE (PHOBIUS); IPR007087 (PROSITE_PROFILES); IPR007087 (PROSITE_PROFILES); IPR007087 (PROSITE_PROFILES); IPR007087 (PROSITE_PROFILES); IPR007087 (PROSITE_PROFILES); SSF57667 (SUPERFAMILY); SSF57667 (SUPERFAMILY); SSF57667 (SUPERFAMILY); TMhelix (TMHMM); TMhelix (TMHMM) |

|      |                                                                                                        |     |                                                       |      |           |        |         |                                                                                                                                                                                                                                                                                                                                                                                                                                                                                                                                                                                                                                                             |
|------|--------------------------------------------------------------------------------------------------------|-----|-------------------------------------------------------|------|-----------|--------|---------|-------------------------------------------------------------------------------------------------------------------------------------------------------------------------------------------------------------------------------------------------------------------------------------------------------------------------------------------------------------------------------------------------------------------------------------------------------------------------------------------------------------------------------------------------------------------------------------------------------------------------------------------------------------|
| 1295 | c29863_g14_i1_len_987_path_4110_0_986_1                                                                | 22  | high affinity nerve growth factor                     | 322  | 9.00E-32  | 74.30% | 0.18    | IPR020635 (SMART); G3DSA:1.10.510.10 (GENE3D); IPR001245 (PFAM); PTHR24418:SF198 (PANTHER); PTHR24418 (PANTHER); IPR008266 (PROSITE_PATTERNS); NON_CYTOPLASMIC_DOMAIN (PHOBIUS); CYTOPLASMIC_DOMAIN (PHOBIUS); TRANSMEMBRANE (PHOBIUS); IPR011009 (SUPERFAMILY)                                                                                                                                                                                                                                                                                                                                                                                             |
| 1296 | c29865_g6_i1_len_3235_path_3969_0_43_4013_44_1598_5568_1599_3234_0                                     | 360 | lamin dm0-like isoform x1                             | 1079 | 3.59E-164 | 74.40% | 0.152   | Coil (COILS); Coil (COILS); Coil (COILS); Coil (COILS); G3DSA:1.20.5.170 (GENE3D); IPR001664 (PFAM); IPR001322 (G3DSA:2.60.40.GENE3D); IPR001322 (PFAM); IPR001664 (PANTHER); IPR027696 (PTHR23239:PANTHER); IPR018039 (PROSITE_PATTERNS); CYTOPLASMIC_DOMAIN (PHOBIUS); NON_CYTOPLASMIC_DOMAIN (PHOBIUS); NON_CYTOPLASMIC_DOMAIN (PHOBIUS); TRANSMEMBRANE (PHOBIUS); TRANSMEMBRANE (PHOBIUS); SSF64593 (SUPERFAMILY); IPR001322 (SUPERFAMILY); TMhelix (TMHMM); TMhelix (TMHMM)                                                                                                                                                                            |
| 1297 | c29879_g1_i1_len_2432_path_4646_0_164_4810_165_168_2176_169_211_4855_212_1100_955_1101_1222_5864_12_0  | 686 | low quality protein: hemocytin                        | 806  | 2.55E-79  | 47.10% | 0.175   | IPR001846 (SMART); IPR014853 (PFAM); G3DSA:2.10.25.10 (GENE3D); IPR001846 (PFAM); PTHR11339 (PANTHER); PTHR11339:SF25 (PANTHER); IPR001846 (PROSITE_PROFILES); IPR001846 (PROSITE_PROFILES); IPR002919 (SUPERFAMILY)                                                                                                                                                                                                                                                                                                                                                                                                                                        |
| 1298 | c29879_g2_i1_len_1637_path_4646_0_164_2172_165_168_2176_169_211_77_212_1091_955_10_92_1213_2025_1214_0 | 119 | hemocytin-like isoform x3                             | 546  | 2.20E-37  | 46.10% | 0.17    | G3DSA:2.10.25.10 (GENE3D); IPR001846 (PFAM); IPR014853 (PFAM); IPR001846 (PROSITE_PROFILES); IPR002919 (SUPERFAMILY)                                                                                                                                                                                                                                                                                                                                                                                                                                                                                                                                        |
| 1299 | c29891_g1_i1_len_2528_path_1_0_166_168_167_1045_11184_1046_1924_2995_1925_2206_11_352_2207_2220_1_0    | 380 | chorion partial                                       | 843  | 9.56E-39  | 47.10% | 0.169   | IPR019791 (PFAM); IPR019791 (G3DSA:1.10.640.GENE3D); IPR029590 (PTHR11475:PANTHER); PTHR11475 (PANTHER); NON_CYTOPLASMIC_DOMAIN (PHOBIUS); TRANSMEMBRANE (PHOBIUS); CYTOPLASMIC_DOMAIN (PHOBIUS); TRANSMEMBRANE (PHOBIUS); CYTOPLASMIC_DOMAIN (PHOBIUS); TRANSMEMBRANE (PHOBIUS); NON_CYTOPLASMIC_DOMAIN (PHOBIUS); IPR019791 (PROSITE_PROFILES); IPR010255 (SUPERFAMILY); TMhelix (TMHMM); TMhelix (TMHMM)                                                                                                                                                                                                                                                 |
| 1300 | c29891_g1_i1_len_2528_path_1_0_166_168_167_1045_11184_1046_1924_2995_1925_2206_11_352_2207_2220_1_2    | 380 | hypothetical protein DAPPUDRAFT_308673                | 842  | 3.64E-06  | 69.25% | 0.15    | IPR019791 (G3DSA:1.10.640.GENE3D); PTHR11475 (PANTHER); IPR029585 (PTHR11475:PANTHER); IPR010255 (SUPERFAMILY)                                                                                                                                                                                                                                                                                                                                                                                                                                                                                                                                              |
| 1301 | c29891_g1_i2_len_3280_path_10338_0_728_111_84_729_1607_1926_1608_2461_2780_2462_24_63_2782_2464_26_1   | 653 | chorion peroxidase-like                               | 1093 | 7.02E-169 | 57.40% | 0.203   | IPR019791 (PRINTS); IPR019791 (PFAM); IPR019791 (G3DSA:1.10.640.GENE3D); PTHR11475 (PANTHER); IPR019791 (PROSITE_PROFILES); IPR010255 (SUPERFAMILY)                                                                                                                                                                                                                                                                                                                                                                                                                                                                                                         |
| 1302 | c29891_g1_i3_len_3597_path_1_0_166_168_167_1045_11184_1046_1924_1926_1925_2778_27_80_2779_2780_27_0    | 895 | chorion peroxidase-like                               | 1199 | 2.40E-169 | 55.40% | 0.169   | IPR019791 (PRINTS); IPR019791 (PFAM); IPR019791 (G3DSA:1.10.640.GENE3D); PTHR11475 (PANTHER); NON_CYTOPLASMIC_DOMAIN (PHOBIUS); NON_CYTOPLASMIC_DOMAIN (PHOBIUS); TRANSMEMBRANE (PHOBIUS); CYTOPLASMIC_DOMAIN (PHOBIUS); TRANSMEMBRANE (PHOBIUS); IPR019791 (PROSITE_PROFILES); IPR010255 (SUPERFAMILY); TMhelix (TMHMM)                                                                                                                                                                                                                                                                                                                                    |
| 1303 | c29899_g1_i1_len_3205_path_1_0_574_576_575_575_577_576_576_578_577_3204_5                              | 973 | transforming growth factor-beta-induced protein ig-h3 | 1068 | 0         | 55.80% | 0.483 Y | Coil (COILS); IPR000782 (SMART); IPR000782 (G3DSA:2.30.180.GENE3D); IPR000782 (PFAM); PTHR10900:SF73 (PANTHER); PTHR10900 (PANTHER); SIGNAL_PEPTIDE_H_REGION (PHOBIUS); SIGNAL_PEPTIDE_N_REGION (PHOBIUS); TRANSMEMBRANE (PHOBIUS); NON_CYTOPLASMIC_DOMAIN (PHOBIUS); NON_CYTOPLASMIC_DOMAIN (PHOBIUS); CYTOPLASMIC_DOMAIN (PHOBIUS); TRANSMEMBRANE (PHOBIUS); SIGNAL_PEPTIDE_C_REGION (PHOBIUS); CYTOPLASMIC_DOMAIN (PHOBIUS); SIGNAL_PEPTIDE (PHOBIUS); IPR000782 (PROSITE_PROFILES); IPR000782 (PROSITE_PROFILES); IPR000782 (PROSITE_PROFILES); IPR000782 (PROSITE_PROFILES); IPR000782 (SUPERFAMILY); IPR000782 (SUPERFAMILY); IPR000782 (SUPERFAMILY) |
| 1304 | c29902_g1_i1_len_2094_path_1117_0_64_231_6_5_67_234_68_346_1457_347_358_7722_359_4_59_7786_460_465_1   | 280 | probable cytochrome p450 49a1                         | 698  | 5.78E-143 | 62.70% | 0.138   | IPR001128 (PRINTS); IPR002401 (PRINTS); IPR001128 (PFAM); IPR001128 (G3DSA:1.10.630.GENE3D); PTHR24305:SF49 (PANTHER); PTHR24305 (PANTHER); IPR017972 (PROSITE_PATTERNS); IPR001128 (SUPERFAMILY)                                                                                                                                                                                                                                                                                                                                                                                                                                                           |
| 1305 | c29922_g1_i1_len_1828_path_4784_0_1310_266_3_1311_1350_25_1351_1362_37_1363_1827_5                     | 39  | protein creg1                                         | 602  | 1.42E-68  | 76.20% | 0.126   | PF13883 (PFAM); IPR012349 (G3DSA:2.30.110.GENE3D); PTHR13343 (PANTHER); PTHR13343:SF17 (PANTHER); CYTOPLASMIC_DOMAIN (PHOBIUS); TRANSMEMBRANE (PHOBIUS); NON_CYTOPLASMIC_DOMAIN (PHOBIUS); TRANSMEMBRANE (PHOBIUS); NON_CYTOPLASMIC_DOMAIN (PHOBIUS); TRANSMEMBRANE (PHOBIUS); CYTOPLASMIC_DOMAIN (PHOBIUS); IPR012349 (SUPERFAMILY); TMhelix (TMHMM); TMhelix (TMHMM); TMhelix (TMHMM)                                                                                                                                                                                                                                                                     |

|      |                                                                                                       |      |                                                  |     |           |        |       |                                                                                                                                                                                                                                                                                                                                                                                                                                                                                                                                                                                                                                                                                                                                                                                                         |
|------|-------------------------------------------------------------------------------------------------------|------|--------------------------------------------------|-----|-----------|--------|-------|---------------------------------------------------------------------------------------------------------------------------------------------------------------------------------------------------------------------------------------------------------------------------------------------------------------------------------------------------------------------------------------------------------------------------------------------------------------------------------------------------------------------------------------------------------------------------------------------------------------------------------------------------------------------------------------------------------------------------------------------------------------------------------------------------------|
| 1306 | c29922_g1_i2_len_1462_path_1724_0_106_1831_107_161_1886_162_209_1934_210_212_1937_213_352_2075_353_5  | 44   | protein creg1                                    | 487 | 5.04E-55  | 77.30% | 0.126 | PF13883 (PFAM); IPR012349 (G3DSA:2.30.110.GENE3D); PTHR13343 (PANTHER); PTHR13343:SF12 (PANTHER); TRANSMEMBRANE (PHOBIUS); NON_CYTOPLASMIC_DOMAIN (PHOBIUS); CYTOPLASMIC_DOMAIN (PHOBIUS); IPR012349 (SUPERFAMILY)                                                                                                                                                                                                                                                                                                                                                                                                                                                                                                                                                                                      |
| 1307 | c29925_g18_i1_len_2202_path_20871_0_567_21_438_568_572_3252_573_1129_7738_1130_1427_28743_1428_1836_0 | 476  | serine threonine-protein kinase grp-like         | 728 | 0         | 74.20% | 0.123 | IPR002290 (SMART); IPR000719 (PFAM); G3DSA:1.10.510.10 (GENE3D); G3DSA:3.30.200.20 (GENE3D); PTHR24344 (PANTHER); IPR017441 (PROSITE_PATTERNS); IPR008271 (PROSITE_PATTERNS); TRANSMEMBRANE (PHOBIUS); NON_CYTOPLASMIC_DOMAIN (PHOBIUS); CYTOPLASMIC_DOMAIN (PHOBIUS); TRANSMEMBRANE (PHOBIUS); CYTOPLASMIC_DOMAIN (PHOBIUS); TRANSMEMBRANE (PHOBIUS); NON_CYTOPLASMIC_DOMAIN (PHOBIUS); IPR000719 (PROSITE_PROFILES); IPR011009 (SUPERFAMILY); TMhelix (TMHMM); TMhelix (TMHMM); TMhelix (TMHMM)                                                                                                                                                                                                                                                                                                       |
| 1308 | c29928_g1_i1_len_2982_path_3377_0_24_3402_25_978_4345_979_988_35_989_1449_4812_14_50_1526_4889_15_3   | 1402 | hemocyanin subunit type 1 precursor              | 987 | 0         | 69.60% | 0.195 | IPR013788 (PRINTS); IPR005203 (PFAM); IPR005203 (G3DSA:2.60.40.GENE3D); IPR005204 (G3DSA:1.20.1370.GENE3D); IPR000896 (PFAM); IPR005204 (PFAM); IPR008922 (G3DSA:1.10.1280.GENE3D); IPR013788 (PANTHER); IPR013788 (PROSITE_PATTERNS); IPR013788 (PROSITE_PATTERNS); IPR002227 (PROSITE_PATTERNS); IPR014756 (SUPERFAMILY); IPR005204 (SUPERFAMILY); IPR008922 (SUPERFAMILY)                                                                                                                                                                                                                                                                                                                                                                                                                            |
| 1309 | c29957_g2_i1_len_2333_path_6375_0_17_6393_18_40_6416_41_212_6588_213_1294_13633_1_295_1295_7667_1_0   | 1168 | chitinase domain-containing protein 1 isoform x1 | 778 | 3.60E-146 | 70.30% | 0.128 | IPR011583 (SMART); IPR013781 (G3DSA:3.20.20.GENE3D); IPR001223 (PFAM); PTHR11177 (PANTHER); PTHR11177:SF135 (PANTHER); NON_CYTOPLASMIC_DOMAIN (PHOBIUS); CYTOPLASMIC_DOMAIN (PHOBIUS); TRANSMEMBRANE (PHOBIUS); IPR017853 (SUPERFAMILY); TMhelix (TMHMM)                                                                                                                                                                                                                                                                                                                                                                                                                                                                                                                                                |
| 1310 | c29957_g2_i2_len_1336_path_6375_0_17_6393_18_40_6416_41_212_6588_213_1294_749_129_5_1299_754_1300_0   | 839  | chitinase domain-containing protein 1 isoform x1 | 446 | 1.86E-118 | 67.40% | 0.128 | IPR011583 (SMART); IPR013781 (G3DSA:3.20.20.GENE3D); IPR001223 (PFAM); PTHR11177 (PANTHER); IPR017853 (SUPERFAMILY)                                                                                                                                                                                                                                                                                                                                                                                                                                                                                                                                                                                                                                                                                     |
| 1311 | c29957_g2_i3_len_2162_path_11298_0_18_6393_19_41_6588_42_1123_13633_1124_1124_766_7_1125_2161_0       | 970  | chitinase domain-containing protein 1 isoform x1 | 721 | 9.38E-147 | 70.30% | 0.198 | IPR011583 (SMART); IPR001223 (PFAM); IPR013781 (G3DSA:3.20.20.GENE3D); PTHR11177 (PANTHER); PTHR11177:SF135 (PANTHER); CYTOPLASMIC_DOMAIN (PHOBIUS); TRANSMEMBRANE (PHOBIUS); TRANSMEMBRANE (PHOBIUS); CYTOPLASMIC_DOMAIN (PHOBIUS); TRANSMEMBRANE (PHOBIUS); NON_CYTOPLASMIC_DOMAIN (PHOBIUS); NON_CYTOPLASMIC_DOMAIN (PHOBIUS); IPR017853 (SUPERFAMILY); TMhelix (TMHMM)                                                                                                                                                                                                                                                                                                                                                                                                                              |
| 1312 | c29969_g2_i1_len_907_path_9165_0_18_9184_1_9_21_9187_22_38_274_39_39_275_40_40_276_41_42_9208_43_61_1 | 40   | xanthine dehydrogenase                           | 302 | 2.55E-66  | 83.60% | 0.101 | IPR008274 (G3DSA:3.30.365.GENE3D); IPR008274 (PFAM); PTHR11908:SF32 (PANTHER); PTHR11908 (PANTHER); NON_CYTOPLASMIC_DOMAIN (PHOBIUS); TRANSMEMBRANE (PHOBIUS); CYTOPLASMIC_DOMAIN (PHOBIUS); IPR008274 (SUPERFAMILY)                                                                                                                                                                                                                                                                                                                                                                                                                                                                                                                                                                                    |
| 1313 | c29969_g2_i3_len_862_path_7243_0_233_5522_234_861_1                                                   | 33   | xanthine dehydrogenase                           | 287 | 6.35E-109 | 80.60% | 0.11  | IPR008274 (G3DSA:3.30.365.GENE3D); IPR008274 (G3DSA:3.30.365.GENE3D); IPR008274 (PFAM); PTHR11908 (PANTHER); PTHR11908:SF32 (PANTHER); IPR008274 (SUPERFAMILY)                                                                                                                                                                                                                                                                                                                                                                                                                                                                                                                                                                                                                                          |
| 1314 | c29969_g2_i5_len_680_path_7243_0_233_3398_234_679_1                                                   | 4    | xanthine dehydrogenase oxidase-like              | 227 | 1.33E-34  | 86.50% | 0.11  | IPR008274 (G3DSA:3.30.365.GENE3D); IPR008274 (PFAM); PTHR11908:SF32 (PANTHER); PTHR11908 (PANTHER); NON_CYTOPLASMIC_DOMAIN (PHOBIUS); TRANSMEMBRANE (PHOBIUS); CYTOPLASMIC_DOMAIN (PHOBIUS); IPR008274 (SUPERFAMILY)                                                                                                                                                                                                                                                                                                                                                                                                                                                                                                                                                                                    |
| 1315 | c29973_g36_i1_len_2302_path_21957_0_1224_2_3181_1225_1225_23182_1226_2301_4                           | 1825 | cathepsin I                                      | 767 | 2.39E-176 | 81.00% | 0.139 | IPR000668 (PRINTS); IPR000668 (SMART); IPR013201 (SMART); IPR013201 (PFAM); G3DSA:3.90.70.10 (GENE3D); IPR000668 (PFAM); PTHR12411:SF57 (PANTHER); IPR013128 (PANTHER); IPR025660 (PROSITE_PATTERNS); IPR000169 (PROSITE_PATTERNS); IPR025661 (PROSITE_PATTERNS); CYTOPLASMIC_DOMAIN (PHOBIUS); TRANSMEMBRANE (PHOBIUS); NON_CYTOPLASMIC_DOMAIN (PHOBIUS); TRANSMEMBRANE (PHOBIUS); NON_CYTOPLASMIC_DOMAIN (PHOBIUS); NON_CYTOPLASMIC_DOMAIN (PHOBIUS); CYTOPLASMIC_DOMAIN (PHOBIUS); NON_CYTOPLASMIC_DOMAIN (PHOBIUS); TRANSMEMBRANE (PHOBIUS); TRANSMEMBRANE (PHOBIUS); TRANSMEMBRANE (PHOBIUS); TRANSMEMBRANE (PHOBIUS); CYTOPLASMIC_DOMAIN (PHOBIUS); SSF54001 (SUPERFAMILY); TMhelix (TMHMM); TMhelix (TMHMM); TMhelix (TMHMM); TMhelix (TMHMM); TMhelix (TMHMM); TMhelix (TMHMM); TMhelix (TMHMM) |

|      |                                                                                                               |        |                                                         |      |           |        |         |                                                                                                                                                                                                                                                                                                                                                                                                                                                                                                                                                                                                                                                                                                                                                                                                                                                                                                                                       |
|------|---------------------------------------------------------------------------------------------------------------|--------|---------------------------------------------------------|------|-----------|--------|---------|---------------------------------------------------------------------------------------------------------------------------------------------------------------------------------------------------------------------------------------------------------------------------------------------------------------------------------------------------------------------------------------------------------------------------------------------------------------------------------------------------------------------------------------------------------------------------------------------------------------------------------------------------------------------------------------------------------------------------------------------------------------------------------------------------------------------------------------------------------------------------------------------------------------------------------------|
| 1316 | c29974_g1_i1_len_2667_path_430_0_223_654__<br>224_1934_3363_1935_1937_706_1938_2221_36<br>41_2222_2222_93_0   | 181    | hemocyte protein-glutamine gamma- partial               | 889  | 0         | 70.20% | 0.166   | IPR002931 (SMART); IPR013783 (G3DSA:2.60.40.GENE3D); IPR002931 (PFAM); IPR013783 (G3DSA:2.60.40.GENE3D); IPR001102 (PFAM); IPR013783 (G3DSA:2.60.40.GENE3D); IPR008958 (PFAM); IPR002931 (G3DSA:3.90.260.GENE3D); IPR023608 (PANTHER); PTHR11590:SF40 (PANTHER); IPR008958 (SUPERFAMILY); SSF54001 (SUPERFAMILY); IPR014756 (SUPERFAMILY); IPR008958 (SUPERFAMILY)                                                                                                                                                                                                                                                                                                                                                                                                                                                                                                                                                                    |
| 1317 | c29974_g1_i2_len_2988_path_7339_0_107_1218<br>_108_133_1243_134_544_654_545_2255_3363<br>_2256_2258_706_0     | 178    | hemocyte protein-glutamine gamma- partial               | 996  | 0         | 70.40% | 0.378 Y | IPR002931 (SMART); IPR008958 (PFAM); IPR013783 (G3DSA:2.60.40.GENE3D); IPR013783 (G3DSA:2.60.40.GENE3D); IPR002931 (G3DSA:3.90.260.GENE3D); IPR002931 (PFAM); IPR013783 (G3DSA:2.60.40.GENE3D); IPR001102 (PFAM); IPR023608 (PANTHER); PTHR11590:SF40 (PANTHER); CYTOPLASMIC_DOMAIN (PHOBIUS); TRANSMEMBRANE (PHOBIUS); NON_CYTOPLASMIC_DOMAIN (PHOBIUS); TRANSMEMBRANE (PHOBIUS); NON_CYTOPLASMIC_DOMAIN (PHOBIUS); IPR008958 (SUPERFAMILY); IPR008958 (SUPERFAMILY); SSF54001 (SUPERFAMILY); IPR014756 (SUPERFAMILY); TMhelix (TMHMM); TMhelix (TMHMM)                                                                                                                                                                                                                                                                                                                                                                              |
| 1318 | c29981_g1_i1_len_3040_path_3315_0_536_3851<br>_537_538_156_539_686_4000_687_708_7038_7<br>09_710_4047_711_9_5 | 846    | sulfhydryl oxidase 1-like                               | 1008 | 2.20E-139 | 54.10% | 0.321   | IPR017905 (G3DSA:1.20.120.GENE3D); IPR013766 (PFAM); IPR017905 (PFAM); IPR012336 (G3DSA:3.40.30.GENE3D); PTHR22897:SF8 (PANTHER); PTHR22897 (PANTHER); CYTOPLASMIC_DOMAIN (PHOBIUS); NON_CYTOPLASMIC_DOMAIN (PHOBIUS); TRANSMEMBRANE (PHOBIUS); IPR017905 (PROSITE_PROFILES); IPR012336 (PROSITE_PROFILES); IPR017905 (SUPERFAMILY); IPR012336 (SUPERFAMILY); TMhelix (TMHMM); TMhelix (TMHMM)                                                                                                                                                                                                                                                                                                                                                                                                                                                                                                                                        |
| 1319 | c29982_g1_i1_len_534_path_9336_0_24_5106_2<br>5_170_2708_171_175_2180_176_340_384_341_<br>392_1871_393_533_5  | 196885 | transmembrane protease serine 6                         | 178  | 3.75E-26  | 50.80% | 0.098   | IPR001314 (PRINTS); IPR002172 (SMART); IPR001254 (SMART); G3DSA:2.40.10.10 (GENE3D); IPR002172 (PFAM); IPR001254 (PFAM); G3DSA:4.10.1220.10 (GENE3D); G3DSA:2.40.10.10 (GENE3D); PTHR24265 (PANTHER); IPR023415 (PROSITE_PATTERNS); IPR018114 (PROSITE_PATTERNS); IPR002172 (PROSITE_PROFILES); IPR001254 (PROSITE_PROFILES); IPR002172 (SUPERFAMILY); IPR009003 (SUPERFAMILY)                                                                                                                                                                                                                                                                                                                                                                                                                                                                                                                                                        |
| 1320 | c29982_g2_i1_len_1128_path_111_0_81_677_82<br>_101_213_102_272_384_273_324_2925_325_38<br>8_1358_389_845_98_4 | 191528 | low-density lipoprotein receptor-related protein 2-like | 376  | 1.34E-49  | 55.70% | 0.800 Y | IPR002172 (PRINTS); IPR002172 (SMART); IPR002172 (G3DSA:4.10.400.GENE3D); IPR002172 (G3DSA:4.10.400.GENE3D); G3DSA:2.40.10.10 (GENE3D); G3DSA:2.40.10.10 (GENE3D); IPR001254 (PFAM); IPR002172 (PFAM); IPR002172 (G3DSA:4.10.400.GENE3D); PTHR10529 (PANTHER); IPR023415 (PROSITE_PATTERNS); IPR023415 (PROSITE_PATTERNS); IPR023415 (PROSITE_PATTERNS); IPR018114 (PROSITE_PATTERNS); IPR023415 (PROSITE_PATTERNS); IPR023415 (PROSITE_PATTERNS); NON_CYTOPLASMIC_DOMAIN (PHOBIUS); SIGNAL_PEPTIDE_H_REGION (PHOBIUS); SIGNAL_PEPTIDE_N_REGION (PHOBIUS); SIGNAL_PEPTIDE_C_REGION (PHOBIUS); SIGNAL_PEPTIDE (PHOBIUS); IPR002172 (PROSITE_PROFILES); IPR002172 (PROSITE_PROFILES); IPR001254 (PROSITE_PROFILES); IPR002172 (PROSITE_PROFILES); IPR002172 (PROSITE_PROFILES); SignalP-noTM (SIGNALP_EUK); IPR002172 (SUPERFAMILY); IPR002172 (SUPERFAMILY); IPR002172 (SUPERFAMILY); IPR002172 (SUPERFAMILY); IPR009003 (SUPERFAMILY) |
| 1321 | c29982_g2_i2_len_892_path_9625_0_75_1281_7<br>6_152_1358_153_609_9821_610_728_5984_729<br>_891_4              | 88749  | low-density lipoprotein receptor-related protein 2-like | 297  | 2.24E-41  | 57.80% | 0.800 Y | IPR002172 (PRINTS); IPR002172 (SMART); IPR002172 (G3DSA:4.10.400.GENE3D); IPR002172 (PFAM); IPR002172 (G3DSA:4.10.400.GENE3D); IPR002172 (G3DSA:4.10.400.GENE3D); PTHR10529 (PANTHER); IPR023415 (PROSITE_PATTERNS); IPR023415 (PROSITE_PATTERNS); IPR023415 (PROSITE_PATTERNS); IPR023415 (PROSITE_PATTERNS); SIGNAL_PEPTIDE_H_REGION (PHOBIUS); SIGNAL_PEPTIDE_N_REGION (PHOBIUS); SIGNAL_PEPTIDE_C_REGION (PHOBIUS); SIGNAL_PEPTIDE (PHOBIUS); NON_CYTOPLASMIC_DOMAIN (PHOBIUS); IPR002172 (PROSITE_PROFILES); IPR002172 (PROSITE_PROFILES); IPR002172 (PROSITE_PROFILES); IPR002172 (PROSITE_PROFILES); SignalP-noTM (SIGNALP_EUK); IPR002172 (SUPERFAMILY); IPR009003 (SUPERFAMILY); IPR002172 (SUPERFAMILY); IPR002172 (SUPERFAMILY); IPR002172 (SUPERFAMILY); IPR002172 (SUPERFAMILY)                                                                                                                                          |

|      |                                                                                                        |        |                                                  |      |           |        |         |                                                                                                                                                                                                                                                                                                                                                                                                                                                                                                                                                                                                                                                                                                                                                                                                                                                                                                                       |
|------|--------------------------------------------------------------------------------------------------------|--------|--------------------------------------------------|------|-----------|--------|---------|-----------------------------------------------------------------------------------------------------------------------------------------------------------------------------------------------------------------------------------------------------------------------------------------------------------------------------------------------------------------------------------------------------------------------------------------------------------------------------------------------------------------------------------------------------------------------------------------------------------------------------------------------------------------------------------------------------------------------------------------------------------------------------------------------------------------------------------------------------------------------------------------------------------------------|
| 1322 | c29982_g3_i1_len_1222_path_6252_0_306_9955_307_308_9625_309_384_9674_385_921_9821_922_1040_3561_104_4  | 381583 | suppressor of tumorigenicity 14 protein          | 407  | 6.43E-56  | 51.30% | 0.791 Y | IPR002172 (PRINTS); IPR002172 (SMART); IPR001254 (SMART); IPR002172 (G3DSA:4.10.400.GENE3D); IPR001254 (PFAM); IPR002172 (G3DSA:4.10.400.GENE3D); G3DSA:2.40.10.10 (GENE3D); G3DSA:2.40.10.10 (GENE3D); IPR002172 (PFAM); PTHR10529 (PANTHER); IPR018114 (PROSITE_PATTERNS); IPR023415 (PROSITE_PATTERNS); IPR023415 (PROSITE_PATTERNS); IPR023415 (PROSITE_PATTERNS); IPR023415 (PROSITE_PATTERNS); IPR023415 (PROSITE_PATTERNS); SIGNAL_PEPTIDE (PHOBIUS); SIGNAL_PEPTIDE_N_REGION (PHOBIUS); SIGNAL_PEPTIDE_H_REGION (PHOBIUS); NON_CYTOPLASMIC_DOMAIN (PHOBIUS); SIGNAL_PEPTIDE_C_REGION (PHOBIUS); IPR002172 (PROSITE_PROFILES); IPR002172 (PROSITE_PROFILES); IPR001254 (PROSITE_PROFILES); IPR002172 (PROSITE_PROFILES); IPR002172 (PROSITE_PROFILES); SignalP-noTM (SIGNAIP_EUK); IPR009003 (SUPERFAMILY); IPR002172 (SUPERFAMILY); IPR002172 (SUPERFAMILY); IPR002172 (SUPERFAMILY); IPR002172 (SUPERFAMILY) |
| 1323 | c29982_g4_i1_len_563_path_8117_0_226_8343_227_236_5022_237_311_1154_312_351_8465_352_562_0             | 118055 | secreted salivary gland                          | 180  | 4.57E-20  | 57.60% | 0.282   | IPR001254 (SMART); G3DSA:2.40.10.10 (GENE3D); IPR001254 (PFAM); PTHR24265 (PANTHER); IPR018114 (PROSITE_PATTERNS); IPR001254 (PROSITE_PROFILES); IPR009003 (SUPERFAMILY)                                                                                                                                                                                                                                                                                                                                                                                                                                                                                                                                                                                                                                                                                                                                              |
| 1324 | c29982_g5_i1_len_447_path_962_0_191_1154_192_231_1599_232_446_0                                        | 29390  | peptidase s1 and s6 chymotrypsin hap             | 143  | 3.57E-14  | 66.70% | 0.109   | IPR001254 (PFAM); G3DSA:2.40.10.10 (GENE3D); PTHR24260 (PANTHER); IPR018114 (PROSITE_PATTERNS); IPR001254 (PROSITE_PROFILES); IPR009003 (SUPERFAMILY)                                                                                                                                                                                                                                                                                                                                                                                                                                                                                                                                                                                                                                                                                                                                                                 |
| 1325 | c29986_g1_i1_len_2346_path_2694_0_837_3531_838_841_160_842_1393_5968_1394_1408_409_8_1409_1432_352_1_4 | 181822 | venom serine carboxypeptidase-like               | 775  | 4.80E-129 | 63.90% | 0.209   | IPR001563 (PRINTS); IPR001563 (PFAM); IPR029058 (G3DSA:3.40.50.GENE3D); IPR001563 (PANTHER); IPR018202 (PROSITE_PATTERNS); CYTOPLASMIC_DOMAIN (PHOBIUS); NON_CYTOPLASMIC_DOMAIN (PHOBIUS); TRANSMEMBRANE (PHOBIUS); IPR029058 (SUPERFAMILY); TMhelix (TMHMM)                                                                                                                                                                                                                                                                                                                                                                                                                                                                                                                                                                                                                                                          |
| 1326 | c30020_g3_i1_len_2007_path_13697_0_20_1391_4_21_1192_1517_1193_1218_9302_1219_1743_9827_1744_1767_13_2 | 40     | flavin-containing monooxygenase fmo gs-ox-like 4 | 669  | 5.10E-112 | 62.40% | 0.105   | IPR000960 (PRINTS); G3DSA:3.50.50.60 (GENE3D); IPR020946 (PFAM); G3DSA:3.50.50.60 (GENE3D); PTHR23023 (PANTHER); PTHR23023:SF4 (PANTHER); NON_CYTOPLASMIC_DOMAIN (PHOBIUS); NON_CYTOPLASMIC_DOMAIN (PHOBIUS); TRANSMEMBRANE (PHOBIUS); CYTOPLASMIC_DOMAIN (PHOBIUS); CYTOPLASMIC_DOMAIN (PHOBIUS); TRANSMEMBRANE (PHOBIUS); TRANSMEMBRANE (PHOBIUS); SSF51905 (SUPERFAMILY); SSF51905 (SUPERFAMILY); TMhelix (TMHMM)                                                                                                                                                                                                                                                                                                                                                                                                                                                                                                  |
| 1327 | c30020_g3_i2_len_2306_path_25_0_319_13914_320_1491_1517_1492_1517_9302_1518_2042_9827_2043_2066_134_1  | 48     | flavin-containing monooxygenase fmo gs-ox-like 4 | 769  | 1.57E-144 | 64.00% | 0.114   | IPR000960 (PRINTS); IPR020946 (PFAM); G3DSA:3.50.50.60 (GENE3D); G3DSA:3.50.50.60 (GENE3D); PTHR23023:SF4 (PANTHER); PTHR23023 (PANTHER); NON_CYTOPLASMIC_DOMAIN (PHOBIUS); TRANSMEMBRANE (PHOBIUS); TRANSMEMBRANE (PHOBIUS); CYTOPLASMIC_DOMAIN (PHOBIUS); NON_CYTOPLASMIC_DOMAIN (PHOBIUS); CYTOPLASMIC_DOMAIN (PHOBIUS); TRANSMEMBRANE (PHOBIUS); SSF51905 (SUPERFAMILY); SSF51905 (SUPERFAMILY); TMhelix (TMHMM); TMhelix (TMHMM)                                                                                                                                                                                                                                                                                                                                                                                                                                                                                 |
| 1328 | c30025_g1_i1_len_318_path_1051_0_21_298_22_200_8920_201_317_1                                          | 376    | chondroitin proteoglycan partial                 | 106  | 1.55E-09  | 59.60% | 0.176   | IPR002557 (SMART); IPR002557 (G3DSA:2.170.140.GENE3D); IPR002557 (PFAM); PTHR23301 (PANTHER); IPR002557 (PROSITE_PROFILES); IPR002557 (SUPERFAMILY)                                                                                                                                                                                                                                                                                                                                                                                                                                                                                                                                                                                                                                                                                                                                                                   |
| 1329 | c30025_g1_i2_len_3319_path_1973_0_248_8920_249_365_2330_366_467_784_468_535_1662_536_598_2557_599_6_1  | 98406  | c-type lectin                                    | 1101 | 4.81E-15  | 50.50% | 0.116   | IPR002557 (SMART); IPR002557 (PFAM); IPR002557 (G3DSA:2.170.140.GENE3D); PTHR11177:SF153 (PANTHER); PTHR11177 (PANTHER); CYTOPLASMIC_DOMAIN (PHOBIUS); TRANSMEMBRANE (PHOBIUS); TRANSMEMBRANE (PHOBIUS); TRANSMEMBRANE (PHOBIUS); CYTOPLASMIC_DOMAIN (PHOBIUS); CYTOPLASMIC_DOMAIN (PHOBIUS); TRANSMEMBRANE (PHOBIUS); NON_CYTOPLASMIC_DOMAIN (PHOBIUS); TRANSMEMBRANE (PHOBIUS); NON_CYTOPLASMIC_DOMAIN (PHOBIUS); NON_CYTOPLASMIC_DOMAIN (PHOBIUS); TRANSMEMBRANE (PHOBIUS); NON_CYTOPLASMIC_DOMAIN (PHOBIUS); TRANSMEMBRANE (PHOBIUS); NON_CYTOPLASMIC_DOMAIN (PHOBIUS); IPR002557 (PROSITE_PROFILES); IPR002557 (SUPERFAMILY); TMhelix (TMHMM); TMhelix (TMHMM); TMhelix (TMHMM); TMhelix (TMHMM); TMhelix (TMHMM)                                                                                                                                                                                                |



|      |                                                                                                           |      |                                                                                                                                                                            |      |           |        |       |                                                                                                                                                                                                                                                                                                                                                                                                                                                                                                                                               |
|------|-----------------------------------------------------------------------------------------------------------|------|----------------------------------------------------------------------------------------------------------------------------------------------------------------------------|------|-----------|--------|-------|-----------------------------------------------------------------------------------------------------------------------------------------------------------------------------------------------------------------------------------------------------------------------------------------------------------------------------------------------------------------------------------------------------------------------------------------------------------------------------------------------------------------------------------------------|
| 1330 | c30044_g10_i1_len_1427_path_28325_0_60_157<br>38_61_67_33841_68_85_33859_86_91_134_92_498_541_499_557_1_1 | 82   | zinc finger protein 501-like                                                                                                                                               | 476  | 1.46E-22  | 47.40% | 0.099 | IPR015880 (SMART); IPR013087 (G3DSA:3.30.160.GENE3D); IPR013087 (G3DSA:3.30.160.GENE3D); PF13465 (PFAM); PTHR24409 (PANTHER); PTHR24409:SF14 (PANTHER); IPR007087 (PROSITE_PATTERNS); IPR007087 (PROSITE_PATTERNS); IPR007087 (PROSITE_PROFILES); IPR007087 (PROSITE_PROFILES); SSF57667 (SUPERFAMILY); SSF57667 (SUPERFAMILY)                                                                                                                                                                                                                |
| 1331 | c30044_g3_i1_len_2721_path_16335_0_300_185<br>59_301_318_16654_319_330_15397_331_345_33594_346_354_1542_0 | 433  | zinc finger protein                                                                                                                                                        | 907  | 4.43E-30  | 51.80% | 0.104 | Coil (COILS); IPR015880 (SMART); PF13465 (PFAM); IPR013087 (G3DSA:3.30.160.GENE3D); PF13894 (PFAM); IPR013087 (G3DSA:3.30.160.GENE3D); PTHR24409 (PANTHER); PTHR24409:SF14 (PANTHER); IPR007087 (PROSITE_PATTERNS); IPR007087 (PROSITE_PATTERNS); IPR007087 (PROSITE_PATTERNS); IPR007087 (PROSITE_PATTERNS); IPR007087 (PROSITE_PROFILES); IPR007087 (PROSITE_PROFILES); IPR007087 (PROSITE_PROFILES); IPR007087 (PROSITE_PROFILES); SSF57667 (SUPERFAMILY); SSF57667 (SUPERFAMILY)                                                          |
| 1332 | c30044_g5_i1_len_784_path_2484_0_27_33668_28_37_9606_38_59_9628_60_77_34503_78_78_34504_79_84_3329_2      | 18   | zinc finger protein                                                                                                                                                        | 261  | 1.86E-12  | 58.60% | 0.101 | IPR015880 (SMART); IPR013087 (G3DSA:3.30.160.GENE3D); IPR007087 (PFAM); PF13894 (PFAM); PTHR24409 (PANTHER); IPR007087 (PROSITE_PATTERNS); IPR007087 (PROSITE_PATTERNS); IPR007087 (PROSITE_PROFILES); IPR007087 (PROSITE_PROFILES); SSF57667 (SUPERFAMILY)                                                                                                                                                                                                                                                                                   |
| 1333 | c30044_g5_i3_len_1254_path_2484_0_27_33668_28_37_9606_38_59_9628_60_77_34503_78_78_34504_79_84_3329_2     | 52   | zinc finger protein                                                                                                                                                        | 418  | 1.39E-17  | 57.30% | 0.101 | IPR015880 (SMART); IPR007087 (PFAM); IPR013087 (G3DSA:3.30.160.GENE3D); IPR013087 (G3DSA:3.30.160.GENE3D); PF13894 (PFAM); PTHR24409 (PANTHER); PTHR24409:SF14 (PANTHER); IPR007087 (PROSITE_PATTERNS); IPR007087 (PROSITE_PATTERNS); IPR007087 (PROSITE_PROFILES); IPR007087 (PROSITE_PROFILES); SSF57667 (SUPERFAMILY); SSF57667 (SUPERFAMILY)                                                                                                                                                                                              |
| 1334 | c30044_g6_i2_len_807_path_27201_0_184_3393_9_185_190_33945_191_205_33960_206_208_23_852_209_292_23936_1   | 9    | zinc finger protein                                                                                                                                                        | 269  | 2.38E-17  | 56.40% | 0.109 | IPR015880 (SMART); PF13894 (PFAM); IPR013087 (G3DSA:3.30.160.GENE3D); IPR007087 (PFAM); IPR013087 (G3DSA:3.30.160.GENE3D); PTHR24409 (PANTHER); PTHR24409:SF14 (PANTHER); IPR007087 (PROSITE_PATTERNS); IPR007087 (PROSITE_PATTERNS); IPR007087 (PROSITE_PROFILES); IPR007087 (PROSITE_PROFILES); IPR007087 (PROSITE_PROFILES); SSF57667 (SUPERFAMILY); SSF57667 (SUPERFAMILY)                                                                                                                                                                |
| 1335 | c30044_g8_i1_len_1438_path_21677_0_1282_49_47_1283_1362_5027_1363_1398_33526_1399_1_406_10750_1407_14_2   | 61   | zinc finger protein 271 (zinc finger protein 7) (zinc finger protein znfphe133) (epstein-barr virus-induced zinc finger protein) (znf-eb) (ct-zfp48) (zinc finger protein) | 479  | 5.58E-31  | 56.90% | 0.106 | IPR015880 (SMART); IPR013087 (G3DSA:3.30.160.GENE3D); IPR007087 (PFAM); PF13894 (PFAM); PF13465 (PFAM); IPR013087 (G3DSA:3.30.160.GENE3D); PTHR24409:SF14 (PANTHER); PTHR24409 (PANTHER); IPR007087 (PROSITE_PATTERNS); IPR007087 (PROSITE_PATTERNS); IPR007087 (PROSITE_PATTERNS); IPR007087 (PROSITE_PATTERNS); IPR007087 (PROSITE_PROFILES); IPR007087 (PROSITE_PROFILES); IPR007087 (PROSITE_PROFILES); IPR007087 (PROSITE_PROFILES); SSF57667 (SUPERFAMILY); SSF57667 (SUPERFAMILY); SSF57667 (SUPERFAMILY)                              |
| 1336 | c30063_g1_i1_len_3031_path_2312_0_233_9268_234_248_2561_249_293_13719_294_308_1373_4_309_323_9160_32_1    | 866  | hemagglutinin                                                                                                                                                              | 1005 | 4.84E-121 | 58.80% | 0.127 | IPR023612 (PRINTS); IPR001570 (PFAM); IPR025711 (PFAM); IPR013856 (G3DSA:3.10.170.GENE3D); IPR011096 (PFAM); IPR013856 (PFAM); IPR007280 (PFAM); G3DSA:1.10.390.10 (GENE3D); TRANSMEMBRANE (PHOBIUS); TRANSMEMBRANE (PHOBIUS); NON_CYTOPLASMIC_DOMAIN (PHOBIUS); CYTOPLASMIC_DOMAIN (PHOBIUS); TRANSMEMBRANE (PHOBIUS); NON_CYTOPLASMIC_DOMAIN (PHOBIUS); NON_CYTOPLASMIC_DOMAIN (PHOBIUS); TRANSMEMBRANE (PHOBIUS); CYTOPLASMIC_DOMAIN (PHOBIUS); SSF55486 (SUPERFAMILY); TMhelix (TMHMM); TMhelix (TMHMM); TMhelix (TMHMM); TMhelix (TMHMM) |
| 1337 | c30063_g1_i2_len_2334_path_2312_0_233_2546_234_248_2561_249_293_13719_294_308_2621_309_330_2643_331_1     | 2619 | hemagglutinin                                                                                                                                                              | 772  | 1.88E-126 | 55.80% | 0.127 | IPR023612 (PRINTS); G3DSA:1.10.390.10 (GENE3D); IPR001570 (PFAM); IPR011096 (PFAM); IPR007280 (PFAM); IPR013856 (G3DSA:3.10.170.GENE3D); IPR025711 (PFAM); IPR013856 (PFAM); CYTOPLASMIC_DOMAIN (PHOBIUS); TRANSMEMBRANE (PHOBIUS); NON_CYTOPLASMIC_DOMAIN (PHOBIUS); SSF55486 (SUPERFAMILY); TMhelix (TMHMM); TMhelix (TMHMM)                                                                                                                                                                                                                |

|      |                                                                                                         |     |                |     |           |        |       |                                                                                                                                                                                                                                                                                                                                                                                                               |
|------|---------------------------------------------------------------------------------------------------------|-----|----------------|-----|-----------|--------|-------|---------------------------------------------------------------------------------------------------------------------------------------------------------------------------------------------------------------------------------------------------------------------------------------------------------------------------------------------------------------------------------------------------------------|
| 1338 | c30063_g2_i1_len_2070_path_13346_0_20_1284_1_21_285_13719_286_300_13734_301_315_563_9_316_2046_14113_2  | 553 | hemagglutinin  | 684 | 8.54E-127 | 56.00% | 0.218 | IPR023612 (PRINTS); IPR013856 (PFAM); IPR011096 (PFAM); IPR007280 (PFAM); IPR001570 (PFAM); G3DSA:1.10.390.10 (GENE3D); IPR013856 (G3DSA:3.10.170.GENE3D); SSF55486 (SUPERFAMILY)                                                                                                                                                                                                                             |
| 1339 | c30064_g2_i1_len_1089_path_384_0_51_436_52_65_450_66_90_6711_91_104_3897_105_285_6_819_286_286_6820_2   | 752 | bursicon alpha | 356 | 1.33E-60  | 85.50% | 0.16  | IPR004133 (PFAM); PTHR11339 (PANTHER); TRANSMEMBRANE (PHOBIUS); TRANSMEMBRANE (PHOBIUS); CYTOPLASMIC_DOMAIN (PHOBIUS); NON_CYTOPLASMIC_DOMAIN (PHOBIUS); NON_CYTOPLASMIC_DOMAIN (PHOBIUS); TRANSMEMBRANE (PHOBIUS); CYTOPLASMIC_DOMAIN (PHOBIUS); IPR006207 (PROSITE_PROFILES); TMhelix (TMHMM); TMhelix (TMHMM); TMhelix (TMHMM); TMhelix (TMHMM)                                                            |
| 1340 | c30064_g2_i10_len_1838_path_2861_0_625_348_7_626_944_3806_945_1034_6819_1035_1035_6_820_1036_1143_418_1 | 684 | bursicon alpha | 600 | 2.01E-32  | 85.10% | 0.258 | TRANSMEMBRANE (PHOBIUS); NON_CYTOPLASMIC_DOMAIN (PHOBIUS); NON_CYTOPLASMIC_DOMAIN (PHOBIUS); CYTOPLASMIC_DOMAIN (PHOBIUS); TRANSMEMBRANE (PHOBIUS); TMhelix (TMHMM); TMhelix (TMHMM)                                                                                                                                                                                                                          |
| 1341 | c30064_g2_i2_len_714_path_5085_0_19_4186_2_0_340_4507_341_407_4574_408_713_2                            | 469 | bursicon alpha | 231 | 1.10E-10  | 82.40% | 0.103 | NON_CYTOPLASMIC_DOMAIN (PHOBIUS); TRANSMEMBRANE (PHOBIUS); NON_CYTOPLASMIC_DOMAIN (PHOBIUS); TRANSMEMBRANE (PHOBIUS); CYTOPLASMIC_DOMAIN (PHOBIUS); TMhelix (TMHMM); TMhelix (TMHMM)                                                                                                                                                                                                                          |
| 1342 | c30064_g2_i3_len_907_path_384_0_51_436_52_65_450_66_90_6711_91_104_6820_105_212_41_86_213_533_4507_5_0  | 654 | bursicon alpha | 296 | 5.58E-32  | 86.40% | 0.263 | TRANSMEMBRANE (PHOBIUS); TRANSMEMBRANE (PHOBIUS); NON_CYTOPLASMIC_DOMAIN (PHOBIUS); NON_CYTOPLASMIC_DOMAIN (PHOBIUS); CYTOPLASMIC_DOMAIN (PHOBIUS); TMhelix (TMHMM); TMhelix (TMHMM)                                                                                                                                                                                                                          |
| 1343 | c30064_g2_i4_len_1546_path_5573_0_151_3487_152_470_3806_471_560_3896_561_561_3897_562_742_6819_743_1    | 757 | bursicon alpha | 504 | 1.90E-59  | 86.20% | 0.129 | IPR004133 (PFAM); PTHR11339 (PANTHER); TRANSMEMBRANE (PHOBIUS); TRANSMEMBRANE (PHOBIUS); CYTOPLASMIC_DOMAIN (PHOBIUS); NON_CYTOPLASMIC_DOMAIN (PHOBIUS); TRANSMEMBRANE (PHOBIUS); NON_CYTOPLASMIC_DOMAIN (PHOBIUS); TRANSMEMBRANE (PHOBIUS); NON_CYTOPLASMIC_DOMAIN (PHOBIUS); CYTOPLASMIC_DOMAIN (PHOBIUS); IPR006207 (PROSITE_PROFILES); TMhelix (TMHMM); TMhelix (TMHMM); TMhelix (TMHMM); TMhelix (TMHMM) |
| 1344 | c30064_g2_i5_len_1072_path_5485_0_87_3897_88_268_6819_269_269_6820_270_377_4186_37_8_698_4507_699_76_0  | 744 | bursicon alpha | 351 | 5.69E-60  | 82.90% | 0.123 | IPR004133 (PFAM); PTHR11339 (PANTHER); CYTOPLASMIC_DOMAIN (PHOBIUS); NON_CYTOPLASMIC_DOMAIN (PHOBIUS); TRANSMEMBRANE (PHOBIUS); SIGNAL_PEPTIDE (PHOBIUS); TRANSMEMBRANE (PHOBIUS); NON_CYTOPLASMIC_DOMAIN (PHOBIUS); SIGNAL_PEPTIDE_C_REGION (PHOBIUS); SIGNAL_PEPTIDE_N_REGION (PHOBIUS); SIGNAL_PEPTIDE_H_REGION (PHOBIUS); IPR006207 (PROSITE_PROFILES); TMhelix (TMHMM); TMhelix (TMHMM); TMhelix (TMHMM) |
| 1345 | c30064_g2_i6_len_1113_path_384_0_51_436_52_65_450_66_90_6711_91_104_3806_105_194_3_896_195_195_3897_0   | 230 | bursicon alpha | 365 | 2.83E-60  | 85.80% | 0.284 | IPR004133 (PFAM); PTHR11339 (PANTHER); TRANSMEMBRANE (PHOBIUS); CYTOPLASMIC_DOMAIN (PHOBIUS); CYTOPLASMIC_DOMAIN (PHOBIUS); TRANSMEMBRANE (PHOBIUS); TRANSMEMBRANE (PHOBIUS); CYTOPLASMIC_DOMAIN (PHOBIUS); TRANSMEMBRANE (PHOBIUS); NON_CYTOPLASMIC_DOMAIN (PHOBIUS); NON_CYTOPLASMIC_DOMAIN (PHOBIUS); IPR006207 (PROSITE_PROFILES); TMhelix (TMHMM); TMhelix (TMHMM); TMhelix (TMHMM)                      |
| 1346 | c30064_g2_i7_len_998_path_384_0_51_436_52_65_450_66_90_6711_91_104_3806_105_194_68_19_195_195_6820_1_1  | 665 | bursicon alpha | 326 | 2.81E-32  | 83.30% | 0.232 | NON_CYTOPLASMIC_DOMAIN (PHOBIUS); CYTOPLASMIC_DOMAIN (PHOBIUS); TRANSMEMBRANE (PHOBIUS); TRANSMEMBRANE (PHOBIUS); NON_CYTOPLASMIC_DOMAIN (PHOBIUS); CYTOPLASMIC_DOMAIN (PHOBIUS); TMhelix (TMHMM); TMhelix (TMHMM); TMhelix (TMHMM)                                                                                                                                                                           |
| 1347 | c30064_g2_i8_len_1364_path_5573_0_151_3487_152_470_3806_471_560_6819_561_561_6820_562_669_4186_670_2    | 672 | bursicon alpha | 443 | 4.43E-32  | 84.20% | 0.108 | CYTOPLASMIC_DOMAIN (PHOBIUS); TRANSMEMBRANE (PHOBIUS); NON_CYTOPLASMIC_DOMAIN (PHOBIUS); NON_CYTOPLASMIC_DOMAIN (PHOBIUS); TRANSMEMBRANE (PHOBIUS); TMhelix (TMHMM); TMhelix (TMHMM); TMhelix (TMHMM)                                                                                                                                                                                                         |
| 1348 | c30064_g2_i9_len_1180_path_384_0_51_436_52_65_450_66_90_6711_91_104_3806_105_194_3_896_195_195_3897_0   | 752 | cg13419        | 387 | 2.52E-60  | 85.40% | 0.284 | IPR004133 (PFAM); PTHR11339 (PANTHER); CYTOPLASMIC_DOMAIN (PHOBIUS); TRANSMEMBRANE (PHOBIUS); CYTOPLASMIC_DOMAIN (PHOBIUS); NON_CYTOPLASMIC_DOMAIN (PHOBIUS); TRANSMEMBRANE (PHOBIUS); TRANSMEMBRANE (PHOBIUS); NON_CYTOPLASMIC_DOMAIN (PHOBIUS); IPR006207 (PROSITE_PROFILES); TMhelix (TMHMM); TMhelix (TMHMM)                                                                                              |
| 1349 | c30069_g1_i1_len_1258_path_196_0_68_136_69_138_349_139_175_386_176_255_3453_256_8_79_1086_880_903_3     | 211 | histone h1     | 412 | 2.83E-38  | 72.40% | 0.216 | IPR005819 (PRINTS); IPR005818 (SMART); IPR005818 (PFAM); IPR011991 (G3DSA:1.10.10.GENE3D); PTHR11467 (PANTHER); CYTOPLASMIC_DOMAIN (PHOBIUS); NON_CYTOPLASMIC_DOMAIN (PHOBIUS); TRANSMEMBRANE (PHOBIUS); IPR005818 (PROSITE_PROFILES); SSF46785 (SUPERFAMILY)                                                                                                                                                 |

|      |                                                                                                        |     |                                        |     |           |        |       |                                                                                                                                                                                                                                                                                                                                                                                                                                                                                                                                                                                    |
|------|--------------------------------------------------------------------------------------------------------|-----|----------------------------------------|-----|-----------|--------|-------|------------------------------------------------------------------------------------------------------------------------------------------------------------------------------------------------------------------------------------------------------------------------------------------------------------------------------------------------------------------------------------------------------------------------------------------------------------------------------------------------------------------------------------------------------------------------------------|
| 1350 | c30069_g1_i2_len_1274_path_196_0_68_264_69_84_136_85_154_349_155_191_386_192_271_3_453_272_895_10_3    | 236 | histone h1                             | 418 | 2.68E-38  | 71.40% | 0.216 | IPR005819 (PRINTS); IPR005818 (SMART); IPR011991 (G3DSA:1.10.10.GENE3D); IPR005818 (PFAM); PTHR11467 (PANTHER); NON_CYTOPLASMIC_DOMAIN (PHOBIUS); TRANSMEMBRANE (PHOBIUS); CYTOPLASMIC_DOMAIN (PHOBIUS); IPR005818 (PROSITE_PROFILES); SSF46785 (SUPERFAMILY)                                                                                                                                                                                                                                                                                                                      |
| 1351 | c30077_g3_i1_len_1270_path_1653_0_75_1729_76_78_1732_79_107_14637_108_122_5484_123_163_1815_164_193_0  | 339 | cytolysin src-1-like                   | 424 | 2.19E-21  | 52.50% | 0.18  | IPR015926 (G3DSA:2.60.270.GENE3D); CYTOPLASMIC_DOMAIN (PHOBIUS); TRANSMEMBRANE (PHOBIUS); NON_CYTOPLASMIC_DOMAIN (PHOBIUS); IPR015926 (SUPERFAMILY); TMhelix (TMHMM); TMhelix (TMHMM)                                                                                                                                                                                                                                                                                                                                                                                              |
| 1352 | c30077_g3_i2_len_1286_path_1653_0_75_9178_76_78_1732_79_107_1761_108_161_1815_162_191_1844_192_336_1   | 451 | cytolysin src-1-like isoform x2        | 422 | 8.95E-25  | 51.20% | 0.108 | IPR015926 (G3DSA:2.60.270.GENE3D); IPR009104 (PFAM); NON_CYTOPLASMIC_DOMAIN (PHOBIUS); CYTOPLASMIC_DOMAIN (PHOBIUS); TRANSMEMBRANE (PHOBIUS); IPR015926 (SUPERFAMILY); TMhelix (TMHMM)                                                                                                                                                                                                                                                                                                                                                                                             |
| 1353 | c30077_g4_i1_len_327_path_1103_0_162_14716_163_184_14738_185_185_14739_186_205_571_1_206_326_0         | 2   | ---NA---                               | 109 |           |        | 0.109 | no IPS match                                                                                                                                                                                                                                                                                                                                                                                                                                                                                                                                                                       |
| 1354 | c30116_g1_i1_len_1367_path_1527_0_16_4146_17_82_1610_83_346_1872_347_359_1885_360_445_4236_446_792_3   | 354 | ras-related protein rab-37 isoform x2  | 451 | 6.28E-112 | 86.10% | 0.236 | IPR001806 (PRINTS); IPR020849 (SMART); IPR003579 (SMART); IPR003578 (SMART); IPR024156 (SMART); IPR002041 (SMART); IPR001806 (PFAM); IPR005225 (TIGRFAM); IPR027417 (G3DSA:3.40.50.GENE3D); PTHR24073:SF342 (PANTHER); PTHR24073 (PANTHER); TRANSMEMBRANE (PHOBIUS); NON_CYTOPLASMIC_DOMAIN (PHOBIUS); CYTOPLASMIC_DOMAIN (PHOBIUS); PS51419 (PROSITE_PROFILES); IPR027417 (SUPERFAMILY); TMhelix (TMHMM)                                                                                                                                                                          |
| 1355 | c30116_g1_i2_len_1476_path_3255_0_17_1610_18_281_1872_282_294_1885_295_380_4236_38_1_727_2316_728_72_3 | 353 | ras-related protein rab-37 isoform x2  | 487 | 4.68E-112 | 87.40% | 0.161 | IPR001806 (PRINTS); IPR003579 (SMART); IPR002041 (SMART); IPR020849 (SMART); IPR024156 (SMART); IPR003578 (SMART); IPR001806 (PFAM); IPR027417 (G3DSA:3.40.50.GENE3D); IPR005225 (TIGRFAM); PTHR24073 (PANTHER); PTHR24073:SF342 (PANTHER); TRANSMEMBRANE (PHOBIUS); NON_CYTOPLASMIC_DOMAIN (PHOBIUS); CYTOPLASMIC_DOMAIN (PHOBIUS); PS51419 (PROSITE_PROFILES); IPR027417 (SUPERFAMILY)                                                                                                                                                                                           |
| 1356 | c30116_g1_i3_len_1333_path_1527_0_16_4146_17_82_1610_83_346_1872_347_359_1885_360_445_4236_446_792_5   | 237 | ras-related protein rab-37 isoform x2  | 439 | 5.44E-112 | 86.60% | 0.118 | IPR001806 (PRINTS); IPR003578 (SMART); IPR003579 (SMART); IPR020849 (SMART); IPR002041 (SMART); IPR024156 (SMART); IPR005225 (TIGRFAM); IPR001806 (PFAM); IPR027417 (G3DSA:3.40.50.GENE3D); PTHR24073 (PANTHER); PTHR24073:SF342 (PANTHER); TRANSMEMBRANE (PHOBIUS); CYTOPLASMIC_DOMAIN (PHOBIUS); NON_CYTOPLASMIC_DOMAIN (PHOBIUS); PS51419 (PROSITE_PROFILES); IPR027417 (SUPERFAMILY); TMhelix (TMHMM)                                                                                                                                                                          |
| 1357 | c30116_g1_i4_len_1541_path_1527_0_16_4146_17_82_1610_83_346_1872_347_359_1885_360_445_4236_446_792_3   | 365 | ras-related protein rab-37 isoform x2  | 509 | 1.31E-111 | 87.50% | 0.161 | IPR001806 (PRINTS); IPR024156 (SMART); IPR020849 (SMART); IPR003578 (SMART); IPR002041 (SMART); IPR003579 (SMART); IPR005225 (TIGRFAM); IPR027417 (G3DSA:3.40.50.GENE3D); IPR001806 (PFAM); PTHR24073 (PANTHER); PTHR24073:SF342 (PANTHER); TRANSMEMBRANE (PHOBIUS); NON_CYTOPLASMIC_DOMAIN (PHOBIUS); CYTOPLASMIC_DOMAIN (PHOBIUS); PS51419 (PROSITE_PROFILES); IPR027417 (SUPERFAMILY); TMhelix (TMHMM)                                                                                                                                                                          |
| 1358 | c30116_g1_i5_len_1640_path_2975_0_115_4146_116_181_1610_182_445_1872_446_458_1885_459_544_4236_545_3   | 376 | ras-related protein rab-37 isoform x2  | 547 | 4.35E-111 | 87.10% | 0.161 | IPR001806 (PRINTS); IPR020849 (SMART); IPR003579 (SMART); IPR024156 (SMART); IPR002041 (SMART); IPR003578 (SMART); IPR027417 (G3DSA:3.40.50.GENE3D); IPR001806 (PFAM); IPR005225 (TIGRFAM); PTHR24073:SF342 (PANTHER); PTHR24073 (PANTHER); CYTOPLASMIC_DOMAIN (PHOBIUS); NON_CYTOPLASMIC_DOMAIN (PHOBIUS); TRANSMEMBRANE (PHOBIUS); PS51419 (PROSITE_PROFILES); IPR027417 (SUPERFAMILY); TMhelix (TMHMM)                                                                                                                                                                          |
| 1359 | c30117_g1_i1_len_1521_path_6045_0_129_4676_130_131_4870_132_179_2284_180_215_5468_216_248_2353_249_0   | 199 | zinc finger protein 85-like isoform x1 | 507 | 1.02E-26  | 53.40% | 0.11  | IPR015880 (SMART); PF13465 (PFAM); IPR013087 (G3DSA:3.30.160.GENE3D); IPR013087 (G3DSA:3.30.160.GENE3D); PF13894 (PFAM); IPR007087 (PFAM); PTHR24409 (PANTHER); PTHR24409:SF14 (PANTHER); IPR007087 (PROSITE_PATTERNS); IPR007087 (PROSITE_PATTERNS); IPR007087 (PROSITE_PATTERNS); IPR007087 (PROSITE_PATTERNS); IPR007087 (PROSITE_PATTERNS); IPR007087 (PROSITE_PROFILES); IPR007087 (PROSITE_PROFILES); IPR007087 (PROSITE_PROFILES); IPR007087 (PROSITE_PROFILES); IPR007087 (PROSITE_PROFILES); IPR007087 (PROSITE_PROFILES); SSF57667 (SUPERFAMILY); SSF57667 (SUPERFAMILY) |

|      |                                                                                                         |     |                              |     |          |        |       |                                                                                                                                                                                                                                                                                                                                                                                                                                                                                                                                                                                                                                                                                                                                                                                                                                                                                                                                                                                                                                                                                          |
|------|---------------------------------------------------------------------------------------------------------|-----|------------------------------|-----|----------|--------|-------|------------------------------------------------------------------------------------------------------------------------------------------------------------------------------------------------------------------------------------------------------------------------------------------------------------------------------------------------------------------------------------------------------------------------------------------------------------------------------------------------------------------------------------------------------------------------------------------------------------------------------------------------------------------------------------------------------------------------------------------------------------------------------------------------------------------------------------------------------------------------------------------------------------------------------------------------------------------------------------------------------------------------------------------------------------------------------------------|
| 1360 | c30117_g1_i2_len_1583_path_2080_0_122_4797_123_184_5678_185_185_4862_186_193_4870_194_241_2284_242_2    | 187 | zinc finger protein 37-like  | 527 | 1.47E-26 | 55.30% | 0.105 | IPR015880 (SMART); IPR007087 (PFAM); IPR013087 (G3DSA:3.30.160.GENE3D); PF13465 (PFAM); PF13894 (PFAM); IPR013087 (G3DSA:3.30.160.GENE3D); PTHR24409 (PANTHER); PTHR24409:SF14 (PANTHER); IPR007087 (PROSITE_PATTERNS); IPR007087 (PROSITE_PATTERNS); IPR007087 (PROSITE_PATTERNS); IPR007087 (PROSITE_PATTERNS); IPR007087 (PROSITE_PROFILES); IPR007087 (PROSITE_PROFILES); IPR007087 (PROSITE_PROFILES); IPR007087 (PROSITE_PROFILES); IPR007087 (PROSITE_PROFILES); SSF57667 (SUPERFAMILY); SSF57667 (SUPERFAMILY)                                                                                                                                                                                                                                                                                                                                                                                                                                                                                                                                                                   |
| 1361 | c30117_g1_i3_len_1968_path_2080_0_122_2203_123_203_2284_204_239_2320_240_272_2353_273_362_2443_363_0    | 479 | zinc finger protein 239-like | 650 | 4.50E-26 | 53.40% | 0.126 | IPR015880 (SMART); IPR013087 (G3DSA:3.30.160.GENE3D); IPR013087 (G3DSA:3.30.160.GENE3D); PF13894 (PFAM); PF13465 (PFAM); IPR007087 (PFAM); PTHR24409 (PANTHER); IPR007087 (PROSITE_PATTERNS); IPR007087 (PROSITE_PATTERNS); IPR007087 (PROSITE_PATTERNS); IPR007087 (PROSITE_PATTERNS); IPR007087 (PROSITE_PROFILES); IPR007087 (PROSITE_PROFILES); IPR007087 (PROSITE_PROFILES); IPR007087 (PROSITE_PROFILES); IPR007087 (PROSITE_PROFILES); SSF57667 (SUPERFAMILY); SSF57667 (SUPERFAMILY)                                                                                                                                                                                                                                                                                                                                                                                                                                                                                                                                                                                             |
| 1362 | c30119_g1_i1_len_2699_path_1267_0_83_934_8_4_447_1713_448_881_2146_882_2596_7513_25_97_2611_7582_2612_1 | 162 | gastrula zinc finger         | 900 | 1.25E-51 | 51.80% | 0.163 | IPR001713 (PRINTS); IPR015880 (SMART); IPR000010 (SMART); IPR013087 (G3DSA:3.30.160.GENE3D); IPR013087 (G3DSA:3.30.160.GENE3D); PF13465 (PFAM); IPR013087 (G3DSA:3.30.160.GENE3D); PF13894 (PFAM); IPR007087 (PFAM); IPR000010 (PFAM); G3DSA:3.10.450.10 (GENE3D); PTHR24409:SF14 (PANTHER); PTHR24409 (PANTHER); IPR007087 (PROSITE_PATTERNS); IPR018073 (PROSITE_PATTERNS); IPR007087 (PROSITE_PROFILES); SSF57667 (SUPERFAMILY); SSF54403 (SUPERFAMILY); SSF57667 (SUPERFAMILY); SSF57667 (SUPERFAMILY); SSF57667 (SUPERFAMILY); SSF57667 (SUPERFAMILY) |
| 1363 | c30124_g1_i2_len_2560_path_2722_0_720_3442_721_721_5785_722_745_3466_746_1320_4041_1321_1321_5537_1_2   | 572 | di-n-acetylchitobiase        | 853 | 6.85E-91 | 59.10% | 0.256 | IPR011583 (SMART); IPR001223 (PFAM); IPR013781 (G3DSA:3.20.20.GENE3D); PTHR11177 (PANTHER); PTHR11177:SF146 (PANTHER); IPR001579 (PROSITE_PATTERNS); TRANSMEMBRANE (PHOBIUS); TRANSMEMBRANE (PHOBIUS); CYTOPLASMIC_DOMAIN (PHOBIUS); CYTOPLASMIC_DOMAIN (PHOBIUS); CYTOPLASMIC_DOMAIN (PHOBIUS); NON_CYTOPLASMIC_DOMAIN (PHOBIUS); TRANSMEMBRANE (PHOBIUS); NON_CYTOPLASMIC_DOMAIN (PHOBIUS); TRANSMEMBRANE (PHOBIUS); TRANSMEMBRANE (PHOBIUS); TRANSMEMBRANE (PHOBIUS); TRANSMEMBRANE (PHOBIUS); NON_CYTOPLASMIC_DOMAIN (PHOBIUS); NON_CYTOPLASMIC_DOMAIN (PHOBIUS); IPRO17853 (SUPERFAMILY); TMhelix (TMHMM); TMhelix (TMHMM); TMhelix (TMHMM)                                                                                                                                                                                                                                                                                                                                                                                                                                         |
| 1364 | c30135_g4_i1_len_1782_path_4557_0_0_4558_1_24_13134_25_255_5611_256_257_5613_258_3_49_13455_350_369_4   | 147 | apolipoprotein d             | 594 | 1.74E-09 | 45.20% | 0.153 | IPR000566 (PFAM); IPR012674 (G3DSA:2.40.128.GENE3D); PTHR10612:SF7 (PANTHER); PTHR10612 (PANTHER); CYTOPLASMIC_DOMAIN (PHOBIUS); TRANSMEMBRANE (PHOBIUS); NON_CYTOPLASMIC_DOMAIN (PHOBIUS); NON_CYTOPLASMIC_DOMAIN (PHOBIUS); CYTOPLASMIC_DOMAIN (PHOBIUS); TRANSMEMBRANE (PHOBIUS); TRANSMEMBRANE (PHOBIUS); IPRO11038 (SUPERFAMILY); TMhelix (TMHMM); TMhelix (TMHMM); TMhelix (TMHMM)                                                                                                                                                                                                                                                                                                                                                                                                                                                                                                                                                                                                                                                                                                 |

|      |                                                                                                        |        |                                         |     |          |        |         |                                                                                                                                                                                                                                                                                                                                                                                                                                                                                                                                                                                                                                                                                                                                             |
|------|--------------------------------------------------------------------------------------------------------|--------|-----------------------------------------|-----|----------|--------|---------|---------------------------------------------------------------------------------------------------------------------------------------------------------------------------------------------------------------------------------------------------------------------------------------------------------------------------------------------------------------------------------------------------------------------------------------------------------------------------------------------------------------------------------------------------------------------------------------------------------------------------------------------------------------------------------------------------------------------------------------------|
| 1365 | c30148_g1_i1_len_1140_path_636_0_93_10492_94_97_10496_98_99_10498_100_100_10499_101_108_10507_109_1_2  | 364870 | isoform a                               | 372 | 6.34E-51 | 56.90% | 0.604 Y | IPR001314 (PRINTS); IPR001254 (SMART); G3DSA:2.40.10.10 (GENE3D); G3DSA:2.40.10.10 (GENE3D); G3DSA:2.40.10.10 (GENE3D); IPR001254 (PFAM); PTHR24268 (PANTHER); IPR018114 (PROSITE_PATTERNS); IPR018114 (PROSITE_PATTERNS); NON_CYTOPLASMIC_DOMAIN (PHOBIUS); SIGNAL_PEPTIDE_C_REGION (PHOBIUS); SIGNAL_PEPTIDE_H_REGION (PHOBIUS); SIGNAL_PEPTIDE (PHOBIUS); SIGNAL_PEPTIDE_N_REGION (PHOBIUS); IPR001254 (PROSITE_PROFILES); SignalP-noTM (SIGNALP_EUK); IPR009003 (SUPERFAMILY)                                                                                                                                                                                                                                                           |
| 1366 | c30148_g1_i2_len_1147_path_636_0_93_730_94_100_10499_101_108_10507_109_141_10540_142_184_821_185_26_2  | 139510 | isoform a                               | 375 | 2.76E-49 | 56.80% | 0.602 Y | IPR001314 (PRINTS); IPR001254 (SMART); IPR001254 (PFAM); G3DSA:2.40.10.10 (GENE3D); G3DSA:2.40.10.10 (GENE3D); G3DSA:2.40.10.10 (GENE3D); PTHR24268 (PANTHER); IPR018114 (PROSITE_PATTERNS); IPR018114 (PROSITE_PATTERNS); SIGNAL_PEPTIDE_H_REGION (PHOBIUS); NON_CYTOPLASMIC_DOMAIN (PHOBIUS); CYTOPLASMIC_DOMAIN (PHOBIUS); TRANSMEMBRANE (PHOBIUS); SIGNAL_PEPTIDE (PHOBIUS); SIGNAL_PEPTIDE_N_REGION (PHOBIUS); SIGNAL_PEPTIDE_C_REGION (PHOBIUS); IPR001254 (PROSITE_PROFILES); SignalP-noTM (SIGNALP_EUK); IPR009003 (SUPERFAMILY)                                                                                                                                                                                                    |
| 1367 | c30148_g1_i3_len_883_path_6849_0_143_10589_144_176_899_177_322_10791_323_327_9571_328_362_1085_363_0   | 87362  | 26kda protease                          | 295 | 1.14E-48 | 56.80% | 0.328   | IPR001314 (PRINTS); IPR001254 (SMART); G3DSA:2.40.10.10 (GENE3D); G3DSA:2.40.10.10 (GENE3D); G3DSA:2.40.10.10 (GENE3D); IPR001254 (PFAM); PTHR24268 (PANTHER); IPR018114 (PROSITE_PATTERNS); IPR018114 (PROSITE_PATTERNS); SIGNAL_PEPTIDE_C_REGION (PHOBIUS); NON_CYTOPLASMIC_DOMAIN (PHOBIUS); SIGNAL_PEPTIDE_N_REGION (PHOBIUS); SIGNAL_PEPTIDE (PHOBIUS); SIGNAL_PEPTIDE_H_REGION (PHOBIUS); IPR001254 (PROSITE_PROFILES); IPR009003 (SUPERFAMILY)                                                                                                                                                                                                                                                                                       |
| 1368 | c30148_g1_i4_len_385_path_6849_0_143_10589_144_176_10620_177_384_0                                     | 5382   | ---NA---                                | 129 |          |        | 0.323   | G3DSA:2.40.10.10 (GENE3D); IPR001254 (PFAM); NON_CYTOPLASMIC_DOMAIN (PHOBIUS); SIGNAL_PEPTIDE_N_REGION (PHOBIUS); SIGNAL_PEPTIDE_C_REGION (PHOBIUS); SIGNAL_PEPTIDE_H_REGION (PHOBIUS); SIGNAL_PEPTIDE (PHOBIUS); IPR009003 (SUPERFAMILY)                                                                                                                                                                                                                                                                                                                                                                                                                                                                                                   |
| 1369 | c30158_g1_i2_len_244_path_1777_0_49_9668_5_0_123_1901_124_126_1904_127_160_4156_161_177_3403_178_236_1 | 0      | zinc finger protein 558                 | 81  | 9.01E-15 | 61.50% | 0.098   | IPR015880 (SMART); IPR013087 (G3DSA:3.30.160.GENE3D); IPR013087 (G3DSA:3.30.160.GENE3D); IPR013087 (G3DSA:3.30.160.GENE3D); PF13465 (PFAM); PTHR24409 (PANTHER); PTHR24409:SF14 (PANTHER); IPR007087 (PROSITE_PATTERNS); IPR007087 (PROSITE_PATTERNS); IPR007087 (PROSITE_PROFILES); IPR007087 (PROSITE_PROFILES); SSF57667 (SUPERFAMILY)                                                                                                                                                                                                                                                                                                                                                                                                   |
| 1370 | c30158_g1_i3_len_701_path_2131_0_289_10854_290_700_1                                                   | 46     | zinc finger protein 213                 | 228 | 1.56E-21 | 61.80% | 0.11    | IPR015880 (SMART); PF13465 (PFAM); IPR013087 (G3DSA:3.30.160.GENE3D); IPR013087 (G3DSA:3.30.160.GENE3D); IPR013087 (G3DSA:3.30.160.GENE3D); PTHR24409:SF14 (PANTHER); PTHR24409 (PANTHER); IPR007087 (PROSITE_PATTERNS); IPR007087 (PROSITE_PATTERNS); IPR007087 (PROSITE_PATTERNS); IPR007087 (PROSITE_PROFILES); IPR007087 (PROSITE_PROFILES); IPR007087 (PROSITE_PROFILES); SSF57667 (SUPERFAMILY); SSF57667 (SUPERFAMILY)                                                                                                                                                                                                                                                                                                               |
| 1371 | c30158_g1_i4_len_1671_path_10390_0_0_10391_1_5_1162_6_108_10419_109_123_1280_124_187_10466_188_229_1   | 287    | zinc finger protein 850-like isoform x1 | 549 | 2.12E-44 | 57.70% | 0.102   | IPR015880 (SMART); IPR013087 (G3DSA:3.30.160.GENE3D); IPR013087 (G3DSA:3.30.160.GENE3D); PF13912 (PFAM); IPR007087 (PFAM); IPR013087 (G3DSA:3.30.160.GENE3D); PF13465 (PFAM); IPR013087 (G3DSA:3.30.160.GENE3D); IPR013087 (G3DSA:3.30.160.GENE3D); PTHR24409 (PANTHER); PTHR24409:SF14 (PANTHER); IPR007087 (PROSITE_PATTERNS); IPR007087 (PROSITE_PATTERNS); IPR007087 (PROSITE_PATTERNS); IPR007087 (PROSITE_PATTERNS); IPR007087 (PROSITE_PATTERNS); IPR007087 (PROSITE_PATTERNS); IPR007087 (PROSITE_PROFILES); IPR007087 (PROSITE_PROFILES); IPR007087 (PROSITE_PROFILES); IPR007087 (PROSITE_PROFILES); IPR007087 (PROSITE_PROFILES); SSF57667 (SUPERFAMILY); SSF57667 (SUPERFAMILY); SSF57667 (SUPERFAMILY); SSF57667 (SUPERFAMILY) |





|      |                                                                                                        |     |                                                               |      |           |         |         |                                                                                                                                                                                                                                                                                                                                                                                                                                                                                                                                                                                                                                                                                                                                               |
|------|--------------------------------------------------------------------------------------------------------|-----|---------------------------------------------------------------|------|-----------|---------|---------|-----------------------------------------------------------------------------------------------------------------------------------------------------------------------------------------------------------------------------------------------------------------------------------------------------------------------------------------------------------------------------------------------------------------------------------------------------------------------------------------------------------------------------------------------------------------------------------------------------------------------------------------------------------------------------------------------------------------------------------------------|
| 1383 | c30248_g3_i1_len_4379_path_14285_0_38_1432_4_39_62_16808_63_837_18356_838_838_7628_839_1666_8446_166_1 | 913 | map kinase-interacting serine threonine-protein kinase 1      | 1460 | 0         | 77.10%  | 0.687 Y | IPR002290 (SMART); IPR000719 (PFAM); G3DSA:1.10.510.10 (GENE3D); G3DSA:3.30.200.20 (GENE3D); PTHR24349 (PANTHER); IPR008271 (PROSITE_PATTERNS); CYTOPLASMIC_DOMAIN (PHOBIUS); SIGNAL_PEPTIDE (PHOBIUS); CYTOPLASMIC_DOMAIN (PHOBIUS); TRANSMEMBRANE (PHOBIUS); SIGNAL_PEPTIDE_N_REGION (PHOBIUS); SIGNAL_PEPTIDE_C_REGION (PHOBIUS); NON_CYTOPLASMIC_DOMAIN (PHOBIUS); NON_CYTOPLASMIC_DOMAIN (PHOBIUS); NON_CYTOPLASMIC_DOMAIN (PHOBIUS); TRANSMEMBRANE (PHOBIUS); TRANSMEMBRANE (PHOBIUS); SIGNAL_PEPTIDE_H_REGION (PHOBIUS); CYTOPLASMIC_DOMAIN (PHOBIUS); TRANSMEMBRANE (PHOBIUS); IPR000719 (PROSITE_PROFILES); SignalP-noTM (SIGNALP_EUK); IPR011009 (SUPERFAMILY); TMhelix (TMHMM); TMhelix (TMHMM); TMhelix (TMHMM); TMhelix (TMHMM); |
| 1384 | c30248_g3_i2_len_4614_path_7457_0_170_1835_6_171_171_7628_172_999_8446_1000_1150_85_96_1151_1153_270_0 | 905 | map kinase-interacting serine threonine-protein kinase 1      | 1538 | 0         | 82.40%  | 0.1     | IPR002290 (SMART); G3DSA:1.10.510.10 (GENE3D); G3DSA:3.30.200.20 (GENE3D); IPR000719 (PFAM); PTHR24349 (PANTHER); IPR008271 (PROSITE_PATTERNS); TRANSMEMBRANE (PHOBIUS); TRANSMEMBRANE (PHOBIUS); CYTOPLASMIC_DOMAIN (PHOBIUS); CYTOPLASMIC_DOMAIN (PHOBIUS); TRANSMEMBRANE (PHOBIUS); NON_CYTOPLASMIC_DOMAIN (PHOBIUS); CYTOPLASMIC_DOMAIN (PHOBIUS); TRANSMEMBRANE (PHOBIUS); NON_CYTOPLASMIC_DOMAIN (PHOBIUS); TRANSMEMBRANE (PHOBIUS); NON_CYTOPLASMIC_DOMAIN (PHOBIUS); NON_CYTOPLASMIC_DOMAIN (PHOBIUS); IPR000719 (PROSITE_PROFILES); IPR011009 (SUPERFAMILY); TMhelix (TMHMM); TMhelix (TMHMM); TMhelix (TMHMM);                                                                                                                      |
| 1385 | c30248_g3_i3_len_3712_path_7457_0_170_1835_6_171_171_7628_172_999_8446_1000_1150_85_96_1151_1153_270_0 | 905 | map kinase-interacting serine threonine-protein kinase 1      | 1238 | 0         | 80.60%  | 0.1     | IPR002290 (SMART); G3DSA:1.10.510.10 (GENE3D); IPR000719 (PFAM); G3DSA:3.30.200.20 (GENE3D); PTHR24349 (PANTHER); IPR008271 (PROSITE_PATTERNS); TRANSMEMBRANE (PHOBIUS); CYTOPLASMIC_DOMAIN (PHOBIUS); CYTOPLASMIC_DOMAIN (PHOBIUS); TRANSMEMBRANE (PHOBIUS); NON_CYTOPLASMIC_DOMAIN (PHOBIUS); TRANSMEMBRANE (PHOBIUS); CYTOPLASMIC_DOMAIN (PHOBIUS); TRANSMEMBRANE (PHOBIUS); NON_CYTOPLASMIC_DOMAIN (PHOBIUS); TRANSMEMBRANE (PHOBIUS); NON_CYTOPLASMIC_DOMAIN (PHOBIUS); IPR000719 (PROSITE_PROFILES); IPR011009 (SUPERFAMILY); TMhelix (TMHMM); TMhelix (TMHMM); TMhelix (TMHMM); TMhelix (TMHMM);                                                                                                                                       |
| 1386 | c30248_g3_i7_len_1237_path_7457_0_170_1835_6_171_171_7628_172_999_1679_1000_1236_0                     | 122 | map kinase-interacting serine threonine-protein kinase 1-like | 413  | 8.05E-147 | 88.90%  | 0.1     | IPR002290 (SMART); G3DSA:3.30.200.20 (GENE3D); G3DSA:1.10.510.10 (GENE3D); IPR000719 (PFAM); PTHR24349 (PANTHER); IPR008271 (PROSITE_PATTERNS); IPR000719 (PROSITE_PROFILES); IPR011009 (SUPERFAMILY);                                                                                                                                                                                                                                                                                                                                                                                                                                                                                                                                        |
| 1387 | c30266_g2_i4_len_4331_path_3562_0_2687_516_06_2688_2695_51614_2696_2700_50895_2701_2845_26955_2846_2_5 | 198 | bacterial transcriptional regulator family protein            | 1443 | 4.62E-63  | 100.00% | 0.107   | IPR029016 (G3DSA:3.30.450.GENE3D); IPR014757 (PFAM); PTHR30136:SF6 (PANTHER); PTHR30136 (PANTHER); TRANSMEMBRANE (PHOBIUS); NON_CYTOPLASMIC_DOMAIN (PHOBIUS); TRANSMEMBRANE (PHOBIUS); CYTOPLASMIC_DOMAIN (PHOBIUS); NON_CYTOPLASMIC_DOMAIN (PHOBIUS); CYTOPLASMIC_DOMAIN (PHOBIUS); NON_CYTOPLASMIC_DOMAIN (PHOBIUS); TRANSMEMBRANE (PHOBIUS); IPR014757 (PROSITE_PROFILES); IPR029016 (SUPERFAMILY); TMhelix (TMHMM); TMhelix (TMHMM);                                                                                                                                                                                                                                                                                                      |
| 1388 | c30268_g13_i1_len_1789_path_13728_0_441_14_169_442_442_8506_443_549_14276_550_574_1_6022_575_1788_5    | 146 | beta- -n-acetylgalactosaminyltransferase bre-4                | 590  | 1.40E-123 | 66.70%  | 0.143   | IPR003859 (PRINTS); IPR029044 (G3DSA:3.90.550.GENE3D); IPR027791 (PFAM); IPR027995 (PFAM); IPR003859 (PANTHER); PTHR19300:SF30 (PANTHER); SIGNAL_PEPTIDE_C_REGION (PHOBIUS); TRANSMEMBRANE (PHOBIUS); SIGNAL_PEPTIDE_H_REGION (PHOBIUS); NON_CYTOPLASMIC_DOMAIN (PHOBIUS); CYTOPLASMIC_DOMAIN (PHOBIUS); SIGNAL_PEPTIDE (PHOBIUS); SIGNAL_PEPTIDE_N_REGION (PHOBIUS); IPR029044 (SUPERFAMILY); TMhelix (TMHMM);                                                                                                                                                                                                                                                                                                                               |
| 1389 | c30271_g18_i1_len_1992_path_11337_0_1991_3                                                             | 85  | trehalase-like isoform x1                                     | 664  | 6.60E-100 | 69.40%  | 0.105   | IPR001661 (PRINTS); IPR001661 (PFAM); PTHR23403:SF1 (PANTHER); IPR001661 (PANTHER); IPR018232 (PROSITE_PATTERNS); CYTOPLASMIC_DOMAIN (PHOBIUS); NON_CYTOPLASMIC_DOMAIN (PHOBIUS); TRANSMEMBRANE (PHOBIUS); NON_CYTOPLASMIC_DOMAIN (PHOBIUS); CYTOPLASMIC_DOMAIN (PHOBIUS); TRANSMEMBRANE (PHOBIUS); TRANSMEMBRANE (PHOBIUS); NON_CYTOPLASMIC_DOMAIN (PHOBIUS); IPR008928 (SUPERFAMILY); TMhelix (TMHMM); TMhelix (TMHMM); TMhelix (TMHMM); TMhelix (TMHMM);                                                                                                                                                                                                                                                                                   |

|      |                                                                                                         |       |                                                         |     |           |        |         |                                                                                                                                                                                                                                                                                                                                                                                                                                                                     |
|------|---------------------------------------------------------------------------------------------------------|-------|---------------------------------------------------------|-----|-----------|--------|---------|---------------------------------------------------------------------------------------------------------------------------------------------------------------------------------------------------------------------------------------------------------------------------------------------------------------------------------------------------------------------------------------------------------------------------------------------------------------------|
| 1390 | c30271_g19_i9_len_947_path_8421_0_185_3558_0_186_188_8610_189_946_3                                     | 68    | cysteine string protein                                 | 316 | 3.20E-106 | 76.20% | 0.162   | IPR001623 (PRINTS); IPR001623 (SMART); IPR001623 (G3DSA:1.10.287.GENE3D); IPR001623 (PFAM); PTHR24078 (PANTHER); PTHR24078:SF5 (PANTHER); IPR018253 (PROSITE_PATTERNS); CYTOPLASMIC_DOMAIN (PHOBIUS); NON_CYTOPLASMIC_DOMAIN (PHOBIUS); TRANSMEMBRANE (PHOBIUS); NON_CYTOPLASMIC_DOMAIN (PHOBIUS); TRANSMEMBRANE (PHOBIUS); IPR001623 (PROSITE_PROFILES); IPR001623 (SUPERFAMILY)                                                                                   |
| 1391 | c30275_g19_i2_len_1731_path_10179_0_543_32_832_544_1730_1                                               | 46    | alk tyrosine kinase receptor isoform x1                 | 577 | 2.62E-108 | 57.70% | 0.138   | IPR000998 (SMART); IPR002172 (SMART); IPR000998 (PFAM); IPR002172 (PFAM); IPR002172 (G3DSA:4.10.400.GENE3D); PTHR23282 (PANTHER); IPR023415 (PROSITE_PATTERNS); CYTOPLASMIC_DOMAIN (PHOBIUS); TRANSMEMBRANE (PHOBIUS); NON_CYTOPLASMIC_DOMAIN (PHOBIUS); IPR000998 (PROSITE_PROFILES); IPR002172 (PROSITE_PROFILES); IPR000998 (PROSITE_PROFILES); IPR002172 (SUPERFAMILY); IPR013320 (SUPERFAMILY); IPR013320 (SUPERFAMILY); TMhelix (TMHMM)                       |
| 1392 | c30284_g7_i1_len_884_path_2188_0_45_247_46_85_2273_86_102_2290_103_149_2337_150_15_9_2347_160_538_27_1  | 48    | sortilin-related receptor                               | 295 | 1.68E-10  | 54.20% | 0.231   | IPR002172 (PRINTS); IPR002172 (SMART); IPR002172 (G3DSA:4.10.400.GENE3D); IPR002172 (G3DSA:4.10.400.GENE3D); IPR002172 (PFAM); PTHR10529 (PANTHER); IPR023415 (PROSITE_PATTERNS); TRANSMEMBRANE (PHOBIUS); CYTOPLASMIC_DOMAIN (PHOBIUS); NON_CYTOPLASMIC_DOMAIN (PHOBIUS); TRANSMEMBRANE (PHOBIUS); CYTOPLASMIC_DOMAIN (PHOBIUS); IPR002172 (PROSITE_PROFILES); IPR002172 (SUPERFAMILY); IPR002172 (SUPERFAMILY); TMhelix (TMHMM); TMhelix (TMHMM); TMhelix (TMHMM) |
| 1393 | c30284_g7_i2_len_1260_path_223_0_23_247_24_63_7603_64_80_2290_81_127_11838_128_128_2347_129_507_272_0   | 60    | low-density lipoprotein receptor-related protein 2-like | 420 | 1.71E-12  | 45.20% | 0.385 Y | IPR002172 (PRINTS); IPR002172 (SMART); IPR002172 (G3DSA:4.10.400.GENE3D); IPR002172 (G3DSA:4.10.400.GENE3D); IPR002172 (PFAM); PTHR10529 (PANTHER); IPR023415 (PROSITE_PATTERNS); TRANSMEMBRANE (PHOBIUS); TRANSMEMBRANE (PHOBIUS); NON_CYTOPLASMIC_DOMAIN (PHOBIUS); CYTOPLASMIC_DOMAIN (PHOBIUS); IPR002172 (PROSITE_PROFILES); IPR002172 (SUPERFAMILY); IPR002172 (SUPERFAMILY); TMhelix (TMHMM); TMhelix (TMHMM)                                                |
| 1394 | c30313_g1_i3_len_1134_path_1_0_130_5071_13_1_135_137_136_157_159_158_225_5097_226_2_28_5100_229_316_2_3 | 569   | histone h2b                                             | 372 | 1.16E-64  | 99.00% | 0.108   | IPR000558 (PRINTS); IPR000558 (SMART); IPR007125 (PFAM); IPR009072 (G3DSA:1.10.20.GENE3D); IPR000558 (PANTHER); IPR000558 (PROSITE_PATTERNS); IPR009072 (SUPERFAMILY)                                                                                                                                                                                                                                                                                               |
| 1395 | c30315_g8_i1_len_1581_path_2785_0_656_2855_2_657_659_3444_660_1455_4240_1456_1580_4                     | 1600  | torsin- partial                                         | 520 | 6.83E-110 | 66.80% | 0.13    | Coil (COILS); IPR010448 (PFAM); IPR009724 (PFAM); IPR027417 (G3DSA:3.40.50.GENE3D); IPR010448 (PANTHER); NON_CYTOPLASMIC_DOMAIN (PHOBIUS); NON_CYTOPLASMIC_DOMAIN (PHOBIUS); TRANSMEMBRANE (PHOBIUS); TRANSMEMBRANE (PHOBIUS); CYTOPLASMIC_DOMAIN (PHOBIUS); CYTOPLASMIC_DOMAIN (PHOBIUS); TRANSMEMBRANE (PHOBIUS); IPR027417 (SUPERFAMILY); TMhelix (TMHMM); TMhelix (TMHMM)                                                                                       |
| 1396 | c30315_g8_i2_len_1680_path_2785_0_656_2760_657_657_2761_658_702_28498_703_707_2850_4_708_717_28514_7_4  | 1100  | torsin- partial                                         | 553 | 8.43E-103 | 60.90% | 0.13    | Coil (COILS); IPR027417 (G3DSA:3.40.50.GENE3D); IPR009724 (PFAM); IPR010448 (PFAM); IPR010448 (PANTHER); NON_CYTOPLASMIC_DOMAIN (PHOBIUS); TRANSMEMBRANE (PHOBIUS); TRANSMEMBRANE (PHOBIUS); CYTOPLASMIC_DOMAIN (PHOBIUS); NON_CYTOPLASMIC_DOMAIN (PHOBIUS); CYTOPLASMIC_DOMAIN (PHOBIUS); TRANSMEMBRANE (PHOBIUS); IPR027417 (SUPERFAMILY); TMhelix (TMHMM); TMhelix (TMHMM)                                                                                       |
| 1397 | c30341_g1_i1_len_1218_path_3299_0_181_3476_182_196_1225_197_250_4565_251_294_3587_295_344_4826_345_0    | 17300 | ves g 5 allergen                                        | 400 | 1.77E-46  | 52.80% | 0.383 Y | IPR001283 (PRINTS); IPR002413 (PRINTS); IPR014044 (SMART); IPR014044 (PFAM); IPR014044 (G3DSA:3.40.33.GENE3D); IPR001283 (PANTHER); IPR018244 (PROSITE_PATTERNS); NON_CYTOPLASMIC_DOMAIN (PHOBIUS); CYTOPLASMIC_DOMAIN (PHOBIUS); NON_CYTOPLASMIC_DOMAIN (PHOBIUS); TRANSMEMBRANE (PHOBIUS); TRANSMEMBRANE (PHOBIUS); IPR014044 (SUPERFAMILY); TMhelix (TMHMM); TMhelix (TMHMM)                                                                                     |

|      |                                                                                                        |        |                                                               |     |           |        |         |                                                                                                                                                                                                                                                                                                                                                                                                                                                                                                                                                                                                                                                                                                                                                                                                                                                                                                                                                                                                                                          |
|------|--------------------------------------------------------------------------------------------------------|--------|---------------------------------------------------------------|-----|-----------|--------|---------|------------------------------------------------------------------------------------------------------------------------------------------------------------------------------------------------------------------------------------------------------------------------------------------------------------------------------------------------------------------------------------------------------------------------------------------------------------------------------------------------------------------------------------------------------------------------------------------------------------------------------------------------------------------------------------------------------------------------------------------------------------------------------------------------------------------------------------------------------------------------------------------------------------------------------------------------------------------------------------------------------------------------------------------|
| 1398 | c30343_g1_i1_len_2320_path_2548_0_361_2910_362_376_2925_377_524_3071_525_526_3073_527_1013_3558_101_2  | 855    | phenoloxidase subunit a3                                      | 757 | 0         | 60.70% | 0.612 Y | IPR013788 (PRINTS); IPR005203 (PFAM); IPR008922 (G3DSA:1.10.1280.GENE3D); IPR005203 (G3DSA:2.60.40.GENE3D); IPR000896 (PFAM); IPR005204 (G3DSA:1.20.1370.GENE3D); IPR005204 (PFAM); PTHR11511:SF24 (PANTHER); IPR013788 (PANTHER); IPR002227 (PROSITE_PATTERNS); IPR013788 (PROSITE_PATTERNS); IPR013788 (PROSITE_PATTERNS); SIGNAL_PEPTIDE (PHOBIUS); SIGNAL_PEPTIDE_H_REGION (PHOBIUS); SIGNAL_PEPTIDE_N_REGION (PHOBIUS); SIGNAL_PEPTIDE_C_REGION (PHOBIUS); NON_CYTOPLASMIC_DOMAIN (PHOBIUS); SignalP-noTM (SIGNALP_EUK); IPR008922 (SUPERFAMILY); IPR005204 (SUPERFAMILY); IPR014756 (SUPERFAMILY)                                                                                                                                                                                                                                                                                                                                                                                                                                  |
| 1399 | c30343_g1_i2_len_793_path_5805_0_361_4431_362_792_2                                                    | 34     | phenoloxidase subunit a3-like                                 | 248 | 2.14E-53  | 60.10% | 0.099   | IPR005203 (PFAM); IPR005203 (G3DSA:2.60.40.GENE3D); PTHR11511:SF24 (PANTHER); IPR013788 (PANTHER); IPR014756 (SUPERFAMILY)                                                                                                                                                                                                                                                                                                                                                                                                                                                                                                                                                                                                                                                                                                                                                                                                                                                                                                               |
| 1400 | c30346_g1_i3_len_1794_path_927_0_414_1342_415_500_1428_501_513_6066_514_577_6113_578_586_6122_587_5_2  | 355    | probable cytochrome p450 49a1                                 | 592 | 2.10E-137 | 60.50% | 0.265   | IPR002401 (PRINTS); IPR001128 (PRINTS); IPR001128 (PFAM); IPR001128 (G3DSA:1.10.630.GENE3D); PTHR24305:SF49 (PANTHER); PTHR24305 (PANTHER); IPR017972 (PROSITE_PATTERNS); CYTOPLASMIC_DOMAIN (PHOBIUS); NON_CYTOPLASMIC_DOMAIN (PHOBIUS); TRANSMEMBRANE (PHOBIUS); IPR001128 (SUPERFAMILY); TMhelix (TMHMM)                                                                                                                                                                                                                                                                                                                                                                                                                                                                                                                                                                                                                                                                                                                              |
| 1401 | c30368_g1_i1_len_740_path_2300_0_69_9482_7_0_73_9486_74_93_198_94_201_306_202_324_9_240_325_355_3748_2 | 94156  | low-density lipoprotein receptor-related protein 2 isoform x2 | 246 | 1.34E-38  | 56.50% | 0.783 Y | IPR002172 (PRINTS); IPR002172 (SMART); IPR002172 (PFAM); IPR002172 (G3DSA:4.10.400.GENE3D); IPR002172 (G3DSA:4.10.400.GENE3D); IPR002172 (G3DSA:4.10.400.GENE3D); PTHR10529 (PANTHER); IPR023415 (PROSITE_PATTERNS); IPR023415 (PROSITE_PATTERNS); IPR023415 (PROSITE_PATTERNS); NON_CYTOPLASMIC_DOMAIN (PHOBIUS); SIGNAL_PEPTIDE_H_REGION (PHOBIUS); SIGNAL_PEPTIDE_C_REGION (PHOBIUS); SIGNAL_PEPTIDE (PHOBIUS); SIGNAL_PEPTIDE_N_REGION (PHOBIUS); IPR002172 (PROSITE_PROFILES); IPR002172 (PROSITE_PROFILES); IPR002172 (PROSITE_PROFILES); IPR002172 (PROSITE_PROFILES); SignalP-noTM (SIGNALP_EUK); SignalP-TM (SIGNALP_GRAM_POSITIVE); IPR002172 (SUPERFAMILY); IPR002172 (SUPERFAMILY); IPR002172 (SUPERFAMILY); IPR002172 (SUPERFAMILY)                                                                                                                                                                                                                                                                                         |
| 1402 | c30368_g1_i2_len_1910_path_3392_0_72_9482_73_76_9486_77_96_2393_97_113_2410_114_142_3533_143_204_30_2  | 995917 | suppressor of tumorigenicity 14 partial                       | 628 | 6.12E-79  | 52.20% | 0.391 Y | IPR002172 (PRINTS); IPR001254 (SMART); IPR002172 (SMART); IPR001254 (PFAM); G3DSA:2.40.10.10 (GENE3D); IPR002172 (G3DSA:4.10.400.GENE3D); G3DSA:2.40.10.10 (GENE3D); IPR002172 (PFAM); IPR002172 (G3DSA:4.10.400.GENE3D); G3DSA:2.40.10.10 (GENE3D); IPR002172 (G3DSA:4.10.400.GENE3D); PTHR24256 (PANTHER); IPR023415 (PROSITE_PATTERNS); IPR023415 (PROSITE_PATTERNS); IPR023415 (PROSITE_PATTERNS); IPR023415 (PROSITE_PATTERNS); IPR018114 (PROSITE_PATTERNS); IPR018114 (PROSITE_PATTERNS); IPR023415 (PROSITE_PATTERNS); NON_CYTOPLASMIC_DOMAIN (PHOBIUS); CYTOPLASMIC_DOMAIN (PHOBIUS); TRANSMEMBRANE (PHOBIUS); IPR002172 (PROSITE_PROFILES); IPR002172 (PROSITE_PROFILES); IPR002172 (PROSITE_PROFILES); IPR002172 (PROSITE_PROFILES); IPR002172 (PROSITE_PROFILES); IPR002172 (PROSITE_PROFILES); IPR001254 (PROSITE_PROFILES); IPR002172 (SUPERFAMILY); IPR002172 (SUPERFAMILY); IPR002172 (SUPERFAMILY); IPR002172 (SUPERFAMILY); IPR002172 (SUPERFAMILY); IPR009003 (SUPERFAMILY); IPR002172 (SUPERFAMILY); TMhelix (TMHMM) |
| 1403 | c30368_g1_i3_len_1480_path_3392_0_72_9482_73_76_3468_77_113_2410_114_142_7166_143_697_4674_698_744_2   | 615193 | suppressor of tumorigenicity 14 protein                       | 486 | 3.84E-53  | 52.30% | 0.518 Y | IPR001314 (PRINTS); IPR001254 (SMART); IPR002172 (SMART); G3DSA:2.40.10.10 (GENE3D); G3DSA:2.40.10.10 (GENE3D); IPR002172 (G3DSA:4.10.400.GENE3D); IPR001254 (PFAM); IPR002172 (PFAM); G3DSA:2.40.10.10 (GENE3D); PTHR24256 (PANTHER); IPR018114 (PROSITE_PATTERNS); IPR018114 (PROSITE_PATTERNS); IPR023415 (PROSITE_PATTERNS); NON_CYTOPLASMIC_DOMAIN (PHOBIUS); TRANSMEMBRANE (PHOBIUS); CYTOPLASMIC_DOMAIN (PHOBIUS); NON_CYTOPLASMIC_DOMAIN (PHOBIUS); TRANSMEMBRANE (PHOBIUS); IPR001254 (PROSITE_PROFILES); IPR002172 (PROSITE_PROFILES); SignalP-TM (SIGNALP_GRAM_POSITIVE); SignalP-TM (SIGNALP_EUK); IPR009003 (SUPERFAMILY); IPR002172 (SUPERFAMILY); TMhelix (TMHMM)                                                                                                                                                                                                                                                                                                                                                         |

|      |                                                                                                       |        |                                                    |      |          |        |         |                                                                                                                                                                                                                                                                                                                                                                                                                                                                                                                                                                                                                                                                                                                                                                     |
|------|-------------------------------------------------------------------------------------------------------|--------|----------------------------------------------------|------|----------|--------|---------|---------------------------------------------------------------------------------------------------------------------------------------------------------------------------------------------------------------------------------------------------------------------------------------------------------------------------------------------------------------------------------------------------------------------------------------------------------------------------------------------------------------------------------------------------------------------------------------------------------------------------------------------------------------------------------------------------------------------------------------------------------------------|
| 1404 | c30382_g13_i1_len_1594_path_48049_0_571_15326_572_642_15398_643_1078_15834_1079_1434_42551_1435_145_4 | 175    | maguk p55 subfamily member 6 isoform x2            | 526  | 7.67E-19 | 79.60% | 0.146   | IPR027417 (G3DSA:3.40.50.GENE3D); PTHR23122 (PANTHER); CYTOPLASMIC_DOMAIN (PHOBIUS); NON_CYTOPLASMIC_DOMAIN (PHOBIUS); NON_CYTOPLASMIC_DOMAIN (PHOBIUS); TRANSMEMBRANE (PHOBIUS); TRANSMEMBRANE (PHOBIUS); IPR027417 (SUPERFAMILY); TMhelix (TMHMM); TMhelix (TMHMM)                                                                                                                                                                                                                                                                                                                                                                                                                                                                                                |
| 1405 | c30382_g13_i2_len_2383_path_15325_0_0_15326_1_71_15397_72_72_15398_73_508_16390_509_1975_33883_1976_4 | 256    | maguk p55 subfamily member 6 isoform x1            | 789  | 0        | 76.90% | 0.269   | IPR001452 (SMART); IPR008145 (SMART); IPR001478 (SMART); IPR004172 (SMART); IPR001478 (G3DSA:2.30.42.GENE3D); IPR011511 (PFAM); IPR001478 (PFAM); G3DSA:3.30.63.10 (GENE3D); IPR008145 (PFAM); G3DSA:2.30.30.40 (GENE3D); IPR014775 (PFAM); IPR027417 (G3DSA:3.40.50.GENE3D); PTHR23122 (PANTHER); IPR020590 (PROSITE_PATTERNS); IPR004172 (PROSITE_PROFILES); IPR001478 (PROSITE_PROFILES); IPR001478 (PROSITE_PROFILES); IPR008144 (PROSITE_PROFILES); IPR001452 (SUPERFAMILY); IPR027417 (SUPERFAMILY); IPR001478 (SUPERFAMILY); SSF101288 (SUPERFAMILY)                                                                                                                                                                                                         |
| 1406 | c30382_g13_i3_len_2854_path_48049_0_571_15326_572_642_15397_643_643_15398_644_1079_16390_1080_2546_3  | 294    | calcium calmodulin-dependent serine protein kinase | 946  | 0        | 75.30% | 0.109   | IPR001478 (SMART); IPR001452 (SMART); IPR004172 (SMART); IPR008145 (SMART); G3DSA:3.30.63.10 (GENE3D); IPR001478 (PFAM); IPR001478 (G3DSA:2.30.42.GENE3D); G3DSA:2.30.30.40 (GENE3D); IPR014775 (PFAM); IPR027417 (G3DSA:3.40.50.GENE3D); IPR008145 (PFAM); IPR011511 (PFAM); PTHR23122 (PANTHER); IPR020590 (PROSITE_PATTERNS); TRANSMEMBRANE (PHOBIUS); NON_CYTOPLASMIC_DOMAIN (PHOBIUS); TRANSMEMBRANE (PHOBIUS); CYTOPLASMIC_DOMAIN (PHOBIUS); NON_CYTOPLASMIC_DOMAIN (PHOBIUS); IPR004172 (PROSITE_PROFILES); IPR008144 (PROSITE_PROFILES); IPR001478 (PROSITE_PROFILES); IPR001452 (PROSITE_PROFILES); IPR001452 (SUPERFAMILY); IPR001478 (SUPERFAMILY); IPR027417 (SUPERFAMILY); SSF101288 (SUPERFAMILY); TMhelix (TMHMM); TMhelix (TMHMM)                   |
| 1407 | c30386_g1_i1_len_1409_path_1867_0_46_1914_47_168_2036_169_180_2048_181_1014_2869_1015_1021_116_1_0    | 476    | marginal zone b- and b1-cell-specific              | 461  | 4.73E-42 | 56.40% | 0.19    | PTHR15881:SF1 (PANTHER); PTHR15881 (PANTHER)                                                                                                                                                                                                                                                                                                                                                                                                                                                                                                                                                                                                                                                                                                                        |
| 1408 | c30416_g2_i1_len_1898_path_5764_0_109_5874_110_113_5878_114_155_5920_156_169_5934_170_299_6064_300_1  | 82423  | matrix metalloproteinase-9 precursor               | 633  | 2.99E-14 | 50.30% | 0.787 Y | IPR001314 (PRINTS); IPR000562 (SMART); IPR001254 (SMART); IPR000562 (PFAM); G3DSA:2.40.10.10 (GENE3D); IPR000562 (G3DSA:2.10.10.GENE3D); IPR001254 (PFAM); IPR000562 (G3DSA:2.10.10.GENE3D); PTHR24260 (PANTHER); PTHR24260:SF51 (PANTHER); SIGNAL_PEPTIDE_H_REGION (PHOBIUS); SIGNAL_PEPTIDE_C_REGION (PHOBIUS); SIGNAL_PEPTIDE (PHOBIUS); NON_CYTOPLASMIC_DOMAIN (PHOBIUS); SIGNAL_PEPTIDE_N_REGION (PHOBIUS); IPR001254 (PROSITE_PROFILES); IPR000562 (PROSITE_PROFILES); IPR000562 (PROSITE_PROFILES); SignalP-noTM (SIGNALP_EUK); SignalP-TM (SIGNALP_GRAM_POSITIVE); IPR009003 (SUPERFAMILY); IPR013806 (SUPERFAMILY); IPR013806 (SUPERFAMILY); TMhelix (TMHMM)                                                                                               |
| 1409 | c30416_g2_i2_len_3809_path_5764_0_109_5874_110_113_5878_114_155_5920_156_169_5934_170_299_6064_300_1  | 121765 | matrix metalloproteinase 9                         | 1270 | 4.89E-17 | 49.30% | 0.787 Y | IPR000562 (SMART); IPR001254 (SMART); IPR000562 (G3DSA:2.10.10.GENE3D); IPR001254 (PFAM); G3DSA:2.40.10.10 (GENE3D); IPR000562 (G3DSA:2.10.10.GENE3D); IPR000562 (PFAM); PTHR24260 (PANTHER); PTHR24260:SF51 (PANTHER); NON_CYTOPLASMIC_DOMAIN (PHOBIUS); NON_CYTOPLASMIC_DOMAIN (PHOBIUS); TRANSMEMBRANE (PHOBIUS); TRANSMEMBRANE (PHOBIUS); SIGNAL_PEPTIDE (PHOBIUS); CYTOPLASMIC_DOMAIN (PHOBIUS); SIGNAL_PEPTIDE_N_REGION (PHOBIUS); SIGNAL_PEPTIDE_C_REGION (PHOBIUS); SIGNAL_PEPTIDE_H_REGION (PHOBIUS); IPR000562 (PROSITE_PROFILES); IPR001254 (PROSITE_PROFILES); IPR000562 (PROSITE_PROFILES); SignalP-TM (SIGNALP_GRAM_POSITIVE); SignalP-noTM (SIGNALP_EUK); IPR013806 (SUPERFAMILY); IPR009003 (SUPERFAMILY); IPR013806 (SUPERFAMILY); TMhelix (TMHMM) |



[illegible]

|      |                                                                                                      |     |                                           |     |          |        |         |  |                                                                                                                                                                                                                                                                                                                                                                                                                                                                                                                                                                                                                                                                                                                                                                                                          |
|------|------------------------------------------------------------------------------------------------------|-----|-------------------------------------------|-----|----------|--------|---------|--|----------------------------------------------------------------------------------------------------------------------------------------------------------------------------------------------------------------------------------------------------------------------------------------------------------------------------------------------------------------------------------------------------------------------------------------------------------------------------------------------------------------------------------------------------------------------------------------------------------------------------------------------------------------------------------------------------------------------------------------------------------------------------------------------------------|
| 1416 | c30425_g2_i2_len_1853_path_7069_0_213_2893_214_228_6748_229_274_7341_275_315_6248_316_344_7409_345_5 | 525 | low quality protein: gastrula zinc finger | 617 | 1.21E-46 | 56.20% | 0.1     |  | IPR015880 (SMART); PF13465 (PFAM); IPR007087 (PFAM); IPR013087 (G3DSA:3.30.160.GENE3D); IPR013087 (G3DSA:3.30.160.GENE3D); IPR013087 (G3DSA:3.30.160.GENE3D); PTHR24409:SF14 (PANTHER); PTHR24409 (PANTHER); IPR007087 (PROSITE_PATTERNS); IPR007087 (PROSITE_PATTERNS); IPR007087 (PROSITE_PATTERNS); IPR007087 (PROSITE_PATTERNS); IPR007087 (PROSITE_PROFILES); IPR007087 (PROSITE_PROFILES); IPR007087 (PROSITE_PROFILES); IPR007087 (PROSITE_PROFILES); IPR007087 (PROSITE_PROFILES); SSF57667 (SUPERFAMILY); SSF57667 (SUPERFAMILY); SSF57667 (SUPERFAMILY)                                                                                                                                                                                                                                        |
| 1417 | c30425_g2_i3_len_1936_path_2443_0_290_6943_291_301_2744_302_338_2781_339_450_2893_451_465_6748_466_4 | 223 | zinc finger protein 699-like              | 640 | 6.73E-59 | 54.90% | 0.104   |  | IPR015880 (SMART); PF13912 (PFAM); IPR007087 (PFAM); IPR013087 (G3DSA:3.30.160.GENE3D); IPR013087 (G3DSA:3.30.160.GENE3D); PF13465 (PFAM); IPR013087 (G3DSA:3.30.160.GENE3D); IPR013087 (G3DSA:3.30.160.GENE3D); PTHR24409 (PANTHER); PTHR24409:SF14 (PANTHER); IPR007087 (PROSITE_PATTERNS); IPR007087 (PROSITE_PATTERNS); IPR007087 (PROSITE_PATTERNS); IPR007087 (PROSITE_PATTERNS); IPR007087 (PROSITE_PATTERNS); IPR007087 (PROSITE_PATTERNS); IPR007087 (PROSITE_PROFILES); SSF57667 (SUPERFAMILY); SSF57667 (SUPERFAMILY); SSF57667 (SUPERFAMILY) |
| 1418 | c30425_g2_i4_len_1700_path_7069_0_213_2893_214_228_6748_229_274_7341_275_315_6248_316_344_7409_345_5 | 322 | gastrula zinc finger protein - partial    | 566 | 9.79E-47 | 55.60% | 0.389 Y |  | IPR015880 (SMART); IPR007087 (PFAM); PF13465 (PFAM); IPR013087 (G3DSA:3.30.160.GENE3D); IPR013087 (G3DSA:3.30.160.GENE3D); IPR013087 (G3DSA:3.30.160.GENE3D); PTHR24409:SF14 (PANTHER); PTHR24409 (PANTHER); IPR007087 (PROSITE_PATTERNS); IPR007087 (PROSITE_PATTERNS); IPR007087 (PROSITE_PATTERNS); IPR007087 (PROSITE_PATTERNS); IPR007087 (PROSITE_PATTERNS); IPR007087 (PROSITE_PATTERNS); IPR007087 (PROSITE_PROFILES); SSF57667 (SUPERFAMILY); SSF57667 (SUPERFAMILY); SSF57667 (SUPERFAMILY)                                                                                  |
| 1419 | c30425_g2_i5_len_1599_path_2443_0_290_6943_291_301_2744_302_338_2781_339_450_2893_451_465_6748_466_3 | 82  | gastrula zinc finger                      | 528 | 4.16E-61 | 56.40% | 0.113   |  | IPR015880 (SMART); IPR013087 (G3DSA:3.30.160.GENE3D); PF13465 (PFAM); IPR013087 (G3DSA:3.30.160.GENE3D); IPR013087 (G3DSA:3.30.160.GENE3D); IPR013087 (G3DSA:3.30.160.GENE3D); PF13912 (PFAM); PTHR24409 (PANTHER); PTHR24409:SF14 (PANTHER); IPR007087 (PROSITE_PATTERNS); IPR007087 (PROSITE_PATTERNS); IPR007087 (PROSITE_PATTERNS); IPR007087 (PROSITE_PATTERNS); IPR007087 (PROSITE_PATTERNS); IPR007087 (PROSITE_PATTERNS); IPR007087 (PROSITE_PROFILES); SSF57667 (SUPERFAMILY); SSF57667 (SUPERFAMILY); SSF57667 (SUPERFAMILY)                                                 |

[illegible]

|      |                                                                                                        |     |                                                                |     |          |        |       |                                                                                                                                                                                                                                                                                                                                                                                                                                                                                                                                                                                                                                                                                                                                                                                                                                                                          |
|------|--------------------------------------------------------------------------------------------------------|-----|----------------------------------------------------------------|-----|----------|--------|-------|--------------------------------------------------------------------------------------------------------------------------------------------------------------------------------------------------------------------------------------------------------------------------------------------------------------------------------------------------------------------------------------------------------------------------------------------------------------------------------------------------------------------------------------------------------------------------------------------------------------------------------------------------------------------------------------------------------------------------------------------------------------------------------------------------------------------------------------------------------------------------|
| 1424 | c30439_g13_i2_len_2511_path_1825_0_1822_36_48_1823_1923_21617_1924_1945_39494_1946_1953_39502_1954_1_3 | 93  | zinc finger protein 782-like                                   | 837 | 2.66E-55 | 51.10% | 0.108 | IPR015880 (SMART); PF13912 (PFAM); IPR007087 (PFAM); IPR013087 (G3DSA:3.30.160.GENE3D); IPR013087 (G3DSA:3.30.160.GENE3D); PF13894 (PFAM); PF13465 (PFAM); IPR013087 (G3DSA:3.30.160.GENE3D); PTHR24409 (PANTHER); PTHR24409:SF13 (PANTHER); IPR007087 (PROSITE_PATTERNS); CYTOPLASMIC_DOMAIN (PHOBIUS); NON_CYTOPLASMIC_DOMAIN (PHOBIUS); TRANSMEMBRANE (PHOBIUS); IPR007087 (PROSITE_PROFILES); IPR007087 (PROSITE_PROFILES); IPR007087 (PROSITE_PROFILES); IPR007087 (PROSITE_PROFILES); IPR007087 (PROSITE_PROFILES); IPR007087 (PROSITE_PROFILES); SSF57667 (SUPERFAMILY); SSF57667 (SUPERFAMILY); SSF57667 (SUPERFAMILY); SSF57667 (SUPERFAMILY) |
| 1425 | c30447_g1_i1_len_1206_path_871_0_181_1053_182_379_1251_380_385_1257_386_409_1281_410_487_5616_48_4     | 3   | hypothetical protein DAPPUDRAFT_194525                         | 402 | 1.43E-49 | 41.00% | 0.24  | IPR013781 (G3DSA:3.20.20.GENE3D); IPR017853 (SUPERFAMILY)                                                                                                                                                                                                                                                                                                                                                                                                                                                                                                                                                                                                                                                                                                                                                                                                                |
| 1426 | c30465_g8_i4_len_1460_path_34871_0_87_2851_9_88_111_28543_112_351_36118_352_369_361_36_370_371_36138_4 | 114 | ---NA---                                                       | 487 |          |        | 0.115 | Coil (COILS); NON_CYTOPLASMIC_DOMAIN (PHOBIUS); TRANSMEMBRANE (PHOBIUS); TRANSMEMBRANE (PHOBIUS); CYTOPLASMIC_DOMAIN (PHOBIUS); NON_CYTOPLASMIC_DOMAIN (PHOBIUS); CYTOPLASMIC_DOMAIN (PHOBIUS); TRANSMEMBRANE (PHOBIUS); TMhelix (TMHMM)                                                                                                                                                                                                                                                                                                                                                                                                                                                                                                                                                                                                                                 |
| 1427 | c30465_g8_i4_len_1460_path_34871_0_87_2851_9_88_111_28543_112_351_36118_352_369_361_36_370_371_36138_5 | 114 | ---NA---                                                       | 486 |          |        | 0.111 | TRANSMEMBRANE (PHOBIUS); CYTOPLASMIC_DOMAIN (PHOBIUS); TRANSMEMBRANE (PHOBIUS); CYTOPLASMIC_DOMAIN (PHOBIUS); TRANSMEMBRANE (PHOBIUS); CYTOPLASMIC_DOMAIN (PHOBIUS); NON_CYTOPLASMIC_DOMAIN (PHOBIUS); TRANSMEMBRANE (PHOBIUS); NON_CYTOPLASMIC_DOMAIN (PHOBIUS); TMhelix (TMHMM); TMhelix (TMHMM)                                                                                                                                                                                                                                                                                                                                                                                                                                                                                                                                                                       |
| 1428 | c30474_g1_i1_len_1140_path_8396_0_44_13258_45_51_8448_52_155_10747_156_423_6770_42_4_462_4312_463_50_4 | 139 | PREDICTED: putative uncharacterized protein ART2-like, partial | 373 | 1.38E-09 | 70.10% | 0.106 | no IPS match                                                                                                                                                                                                                                                                                                                                                                                                                                                                                                                                                                                                                                                                                                                                                                                                                                                             |
| 1429 | c30474_g1_i4_len_1039_path_8396_0_44_13258_45_51_8448_52_155_10747_156_423_6770_42_4_462_4312_463_50_3 | 389 | unnamed protein product                                        | 341 | 2.75E-09 | 72.10% | 0.123 | no IPS match                                                                                                                                                                                                                                                                                                                                                                                                                                                                                                                                                                                                                                                                                                                                                                                                                                                             |
| 1430 | c30486_g1_i1_len_1111_path_793_0_118_912_1_19_348_1142_349_1110_2                                      | 24  | tyrosine-protein kinase receptor tie-1                         | 370 | 9.97E-19 | 57.70% | 0.11  | G3DSA:2.170.300.10 (GENE3D); PTHR24416:SF125 (PANTHER); PTHR24416 (PANTHER); TRANSMEMBRANE (PHOBIUS); CYTOPLASMIC_DOMAIN (PHOBIUS); NON_CYTOPLASMIC_DOMAIN (PHOBIUS); TMhelix (TMHMM)                                                                                                                                                                                                                                                                                                                                                                                                                                                                                                                                                                                                                                                                                    |
| 1431 | c30486_g1_i2_len_889_path_21260_0_126_1142_127_888_2                                                   | 32  | tyrosine-protein kinase receptor tie-1                         | 296 | 1.69E-18 | 57.90% | 0.185 | G3DSA:2.170.300.10 (GENE3D); PTHR24416 (PANTHER); PTHR24416:SF125 (PANTHER); NON_CYTOPLASMIC_DOMAIN (PHOBIUS); CYTOPLASMIC_DOMAIN (PHOBIUS); TRANSMEMBRANE (PHOBIUS); IPR003961 (SUPERFAMILY); TMhelix (TMHMM); TMhelix (TMHMM)                                                                                                                                                                                                                                                                                                                                                                                                                                                                                                                                                                                                                                          |
| 1432 | c30498_g16_i4_len_809_path_15533_0_750_162_84_751_752_8796_753_753_2320_754_808_4                      | 17  | agrin-like isoform x6                                          | 270 | 1.98E-26 | 79.70% | 0.266 | IPR013320 (G3DSA:2.60.120.GENE3D); IPR001791 (PFAM); PTHR10574 (PANTHER); CYTOPLASMIC_DOMAIN (PHOBIUS); NON_CYTOPLASMIC_DOMAIN (PHOBIUS); TRANSMEMBRANE (PHOBIUS); TRANSMEMBRANE (PHOBIUS); NON_CYTOPLASMIC_DOMAIN (PHOBIUS); CYTOPLASMIC_DOMAIN (PHOBIUS); IPR013320 (SUPERFAMILY)                                                                                                                                                                                                                                                                                                                                                                                                                                                                                                                                                                                      |
| 1433 | c30499_g2_i1_len_947_path_3833_0_399_2966_400_526_11958_527_531_4531_532_696_389_6_97_720_12009_721_0  | 15  | dehydrogenase reductase sdr family member 11                   | 316 | 2.77E-13 | 85.70% | 0.109 | IPR016040 (G3DSA:3.40.50.GENE3D); PTHR24322 (PANTHER); PTHR24322:SF310 (PANTHER); SSF51735 (SUPERFAMILY)                                                                                                                                                                                                                                                                                                                                                                                                                                                                                                                                                                                                                                                                                                                                                                 |
| 1434 | c30499_g2_i1_len_947_path_3833_0_399_2966_400_526_11958_527_531_4531_532_696_389_6_97_720_12009_721_2  | 15  | dehydrogenase reductase sdr family member 11 isoform x2        | 315 | 2.46E-11 | 78.10% | 0.205 | IPR016040 (G3DSA:3.40.50.GENE3D); PTHR24322:SF310 (PANTHER); PTHR24322 (PANTHER); SSF51735 (SUPERFAMILY)                                                                                                                                                                                                                                                                                                                                                                                                                                                                                                                                                                                                                                                                                                                                                                 |
| 1435 | c30499_g2_i2_len_1061_path_3807_0_11_11881_12_25_3833_26_425_11916_426_428_4235_42_9_594_2966_595_72_2 | 100 | dehydrogenase reductase sdr family member 11-like              | 353 | 5.10E-57 | 74.80% | 0.117 | IPR002347 (PRINTS); IPR002198 (PFAM); IPR016040 (G3DSA:3.40.50.GENE3D); PTHR24322:SF310 (PANTHER); PTHR24322 (PANTHER); SSF51735 (SUPERFAMILY)                                                                                                                                                                                                                                                                                                                                                                                                                                                                                                                                                                                                                                                                                                                           |
| 1436 | c30499_g2_i3_len_1618_path_3833_0_399_2966_400_526_11958_527_531_469_532_666_604_667_1494_1432_1_0     | 125 | dehydrogenase reductase sdr family member 11-like              | 534 | 8.58E-13 | 86.00% | 0.109 | IPR016040 (G3DSA:3.40.50.GENE3D); PTHR24322 (PANTHER); PTHR24322:SF310 (PANTHER); CYTOPLASMIC_DOMAIN (PHOBIUS); TRANSMEMBRANE (PHOBIUS); NON_CYTOPLASMIC_DOMAIN (PHOBIUS); SSF51735 (SUPERFAMILY)                                                                                                                                                                                                                                                                                                                                                                                                                                                                                                                                                                                                                                                                        |

|      |                                                                                                         |     |                                                       |     |          |        |       |                                                                                                                                                                                                                                                                                                                                                                                                                                                                                                                             |
|------|---------------------------------------------------------------------------------------------------------|-----|-------------------------------------------------------|-----|----------|--------|-------|-----------------------------------------------------------------------------------------------------------------------------------------------------------------------------------------------------------------------------------------------------------------------------------------------------------------------------------------------------------------------------------------------------------------------------------------------------------------------------------------------------------------------------|
| 1437 | c30499_g2_i3_len_1618_path_3833_0_399_2966_400_526_11958_527_531_469_532_666_604_667_1494_1432_1_2      | 125 | dehydrogenase reductase sdr family member 11-like     | 533 | 5.08E-54 | 75.00% | 0.205 | IPR002198 (PRINTS); IPR002347 (PRINTS); IPR002198 (PFAM); IPR016040 (G3DSA:3.40.50.GENE3D); PTHR24322 (PANTHER); PTHR24322:SF310 (PANTHER); SSF51735 (SUPERFAMILY)                                                                                                                                                                                                                                                                                                                                                          |
| 1438 | c30499_g2_i4_len_1813_path_3807_0_11_11881_12_25_3833_26_425_11916_426_428_4235_42_9_594_2966_595_72_2  | 154 | dehydrogenase reductase sdr family member 11-like     | 598 | 2.84E-99 | 74.00% | 0.117 | IPR002347 (PRINTS); IPR002198 (PRINTS); IPR002198 (PFAM); IPR016040 (G3DSA:3.40.50.GENE3D); PTHR24322 (PANTHER); PTHR24322:SF310 (PANTHER); SSF51735 (SUPERFAMILY)                                                                                                                                                                                                                                                                                                                                                          |
| 1439 | c30499_g2_i5_len_1478_path_3833_0_399_2966_400_526_604_527_1354_1432_1355_1372_14_50_1373_1477_0        | 113 | dehydrogenase reductase sdr family member 11-like     | 487 | 1.99E-17 | 67.90% | 0.109 | IPR016040 (G3DSA:3.40.50.GENE3D); IPR016040 (G3DSA:3.40.50.GENE3D); PTHR24322 (PANTHER); PTHR24322:SF310 (PANTHER); SSF51735 (SUPERFAMILY)                                                                                                                                                                                                                                                                                                                                                                                  |
| 1440 | c30499_g2_i5_len_1478_path_3833_0_399_2966_400_526_604_527_1354_1432_1355_1372_14_50_1373_1477_2        | 113 | dehydrogenase reductase sdr family member 11-like     | 487 | 2.26E-10 | 81.10% | 0.205 | IPR016040 (G3DSA:3.40.50.GENE3D); PTHR24322:SF310 (PANTHER); PTHR24322 (PANTHER); NON_CYTOPLASMIC_DOMAIN (PHOBIUS); CYTOPLASMIC_DOMAIN (PHOBIUS); TRANSMEMBRANE (PHOBIUS); SSF51735 (SUPERFAMILY)                                                                                                                                                                                                                                                                                                                           |
| 1441 | c30499_g2_i6_len_1673_path_3807_0_11_11881_12_25_3833_26_425_11916_426_428_4235_42_9_594_2966_595_72_0  | 135 | dehydrogenase reductase sdr family member 11-like     | 552 | 1.12E-14 | 72.20% | 0.109 | IPR016040 (G3DSA:3.40.50.GENE3D); PTHR24322:SF310 (PANTHER); PTHR24322 (PANTHER)                                                                                                                                                                                                                                                                                                                                                                                                                                            |
| 1442 | c30499_g2_i6_len_1673_path_3807_0_11_11881_12_25_3833_26_425_11916_426_428_4235_42_9_594_2966_595_72_2  | 135 | dehydrogenase reductase sdr family member 11          | 552 | 8.52E-55 | 77.00% | 0.117 | IPR002347 (PRINTS); IPR002198 (PFAM); IPR016040 (G3DSA:3.40.50.GENE3D); PTHR24322:SF310 (PANTHER); PTHR24322 (PANTHER); CYTOPLASMIC_DOMAIN (PHOBIUS); NON_CYTOPLASMIC_DOMAIN (PHOBIUS); TRANSMEMBRANE (PHOBIUS); SSF51735 (SUPERFAMILY)                                                                                                                                                                                                                                                                                     |
| 1443 | c30499_g2_i7_len_630_path_7853_0_12_11881_13_26_3833_27_426_11916_427_429_7604_430_629_0                | 6   | dehydrogenase reductase sdr family member 11-like     | 210 | 6.33E-14 | 85.20% | 0.121 | IPR016040 (G3DSA:3.40.50.GENE3D); PTHR24322:SF310 (PANTHER); PTHR24322 (PANTHER); SSF51735 (SUPERFAMILY)                                                                                                                                                                                                                                                                                                                                                                                                                    |
| 1444 | c30501_g12_i1_len_2106_path_23657_0_1265_9_722_1266_2105_5                                              | 72  | u4 u6 small nuclear ribonucleoprotein prp31           | 702 | 0        | 84.50% | 0.133 | IPR012976 (SMART); IPR012976 (PFAM); IPR019175 (PFAM); IPR002687 (PFAM); IPR027105 (PANTHER); CYTOPLASMIC_DOMAIN (PHOBIUS); TRANSMEMBRANE (PHOBIUS); NON_CYTOPLASMIC_DOMAIN (PHOBIUS); IPR002687 (PROSITE_PROFILES); SSF89124 (SUPERFAMILY); TMhelix (TMHMM)                                                                                                                                                                                                                                                                |
| 1445 | c30522_g10_i1_len_2579_path_24415_0_1645_2_6057_1646_1667_26079_1668_1807_26219_180_8_1823_26235_1824_2 | 112 | abhydrolase domain-containing protein 16a             | 854 | 0        | 68.90% | 0.146 | IPR029058 (G3DSA:3.40.50.GENE3D); IPR029059 (PFAM); PTHR12277:SF44 (PANTHER); PTHR12277 (PANTHER); CYTOPLASMIC_DOMAIN (PHOBIUS); TRANSMEMBRANE (PHOBIUS); TRANSMEMBRANE (PHOBIUS); NON_CYTOPLASMIC_DOMAIN (PHOBIUS); IPR029058 (SUPERFAMILY); TMhelix (TMHMM); TMhelix (TMHMM)                                                                                                                                                                                                                                              |
| 1446 | c30522_g10_i2_len_2556_path_24415_0_1645_2_6079_1646_1785_31848_1786_1800_26235_180_1_1814_12570_1815_2 | 92  | abhydrolase domain-containing protein 16a             | 846 | 0        | 69.00% | 0.146 | IPR029058 (G3DSA:3.40.50.GENE3D); IPR029059 (PFAM); PTHR12277:SF44 (PANTHER); PTHR12277 (PANTHER); NON_CYTOPLASMIC_DOMAIN (PHOBIUS); TRANSMEMBRANE (PHOBIUS); NON_CYTOPLASMIC_DOMAIN (PHOBIUS); TRANSMEMBRANE (PHOBIUS); TRANSMEMBRANE (PHOBIUS); CYTOPLASMIC_DOMAIN (PHOBIUS); NON_CYTOPLASMIC_DOMAIN (PHOBIUS); TRANSMEMBRANE (PHOBIUS); CYTOPLASMIC_DOMAIN (PHOBIUS); TRANSMEMBRANE (PHOBIUS); CYTOPLASMIC_DOMAIN (PHOBIUS); IPR029058 (SUPERFAMILY); TMhelix (TMHMM); TMhelix (TMHMM); TMhelix (TMHMM); TMhelix (TMHMM) |
| 1447 | c30526_g1_i6_len_2022_path_5247_0_94_5342_95_807_6053_808_813_11626_814_1129_11234_1130_1140_6385_1_2   | 881 | hemagglutinin amebocyte aggregation factor-like       | 674 | 2.96E-36 | 58.10% | 0.219 | PF14704 (PFAM); IPR026645 (PANTHER); TRANSMEMBRANE (PHOBIUS); TRANSMEMBRANE (PHOBIUS); CYTOPLASMIC_DOMAIN (PHOBIUS); NON_CYTOPLASMIC_DOMAIN (PHOBIUS); NON_CYTOPLASMIC_DOMAIN (PHOBIUS); TMhelix (TMHMM); TMhelix (TMHMM)                                                                                                                                                                                                                                                                                                   |
| 1448 | c30552_g4_i1_len_1303_path_20735_0_255_868_9_256_1302_3                                                 | 29  | cation channel sperm-associated protein subunit gamma | 435 | 1.10E-07 | 48.00% | 0.111 | CYTOPLASMIC_DOMAIN (PHOBIUS); CYTOPLASMIC_DOMAIN (PHOBIUS); NON_CYTOPLASMIC_DOMAIN (PHOBIUS); TRANSMEMBRANE (PHOBIUS); TRANSMEMBRANE (PHOBIUS); TRANSMEMBRANE (PHOBIUS); CYTOPLASMIC_DOMAIN (PHOBIUS); NON_CYTOPLASMIC_DOMAIN (PHOBIUS); TRANSMEMBRANE (PHOBIUS); TMhelix (TMHMM); TMhelix (TMHMM); TMhelix (TMHMM); TMhelix (TMHMM)                                                                                                                                                                                        |
| 1449 | c30552_g4_i1_len_1303_path_20735_0_255_868_9_256_1302_4                                                 | 29  | hypothetical protein TGVAND_316635A, partial          | 434 | 2.47E-08 | 59.00% | 0.108 | TRANSMEMBRANE (PHOBIUS); TRANSMEMBRANE (PHOBIUS); TRANSMEMBRANE (PHOBIUS); NON_CYTOPLASMIC_DOMAIN (PHOBIUS); CYTOPLASMIC_DOMAIN (PHOBIUS); TRANSMEMBRANE (PHOBIUS); NON_CYTOPLASMIC_DOMAIN (PHOBIUS); TRANSMEMBRANE (PHOBIUS); CYTOPLASMIC_DOMAIN (PHOBIUS); TMhelix (TMHMM); TMhelix (TMHMM); TMhelix (TMHMM); TMhelix (TMHMM)                                                                                                                                                                                             |





|      |                                                                                                         |      |                                                   |     |           |        |         |                                                                                                                                                                                                                                                                                                                                                                                                                                                                                                                                                                                                                                                                                                                                                                                                                                                                                                                                                  |
|------|---------------------------------------------------------------------------------------------------------|------|---------------------------------------------------|-----|-----------|--------|---------|--------------------------------------------------------------------------------------------------------------------------------------------------------------------------------------------------------------------------------------------------------------------------------------------------------------------------------------------------------------------------------------------------------------------------------------------------------------------------------------------------------------------------------------------------------------------------------------------------------------------------------------------------------------------------------------------------------------------------------------------------------------------------------------------------------------------------------------------------------------------------------------------------------------------------------------------------|
| 1455 | c30580_g5_i1_len_902_path_5283_0_752_20742_753_755_20745_756_766_20756_767_769_20759_770_775_20765_0    | 11   | slit homolog 3 partial                            | 301 | 2.58E-15  | 68.40% | 0.109   | IPR000372 (SMART); IPR000372 (PFAM); G3DSA:3.80.10.10 (GENE3D); PTHR24369 (PANTHER); NON_CYTOPLASMIC_DOMAIN (PHOBIUS); TRANSMEMBRANE (PHOBIUS); CYTOPLASMIC_DOMAIN (PHOBIUS); SSF52058 (SUPERFAMILY); TMhelix (TMHMM)                                                                                                                                                                                                                                                                                                                                                                                                                                                                                                                                                                                                                                                                                                                            |
| 1456 | c30587_g2_i1_len_696_path_3932_0_32_3965_3_3_347_3932_348_380_3965_381_695_3                            | 9    | zinc finger protein                               | 232 | 6.46E-37  | 57.00% | 0.1     | IPR015880 (SMART); PF13894 (PFAM); IPR013087 (G3DSA:3.30.160.GENE3D); IPR013087 (G3DSA:3.30.160.GENE3D); PTHR24409:SF14 (PANTHER); PTHR24409 (PANTHER); IPR007087 (PROSITE_PATTERNS); IPR007087 (PROSITE_PATTERNS); IPR007087 (PROSITE_PATTERNS); IPR007087 (PROSITE_PATTERNS); IPR007087 (PROSITE_PROFILES); IPR007087 (PROSITE_PROFILES); IPR007087 (PROSITE_PROFILES); IPR007087 (PROSITE_PROFILES); IPR007087 (PROSITE_PROFILES); IPR007087 (PROSITE_PROFILES); SSF57667 (SUPERFAMILY); SSF57667 (SUPERFAMILY); SSF57667 (SUPERFAMILY); SSF57667 (SUPERFAMILY); SSF57667 (SUPERFAMILY); SSF57667 (SUPERFAMILY); IPR000560 (PFAM); IPR029033 (G3DSA:3.40.50.GENE3D); PTHR11567 (PANTHER); PTHR11567:SF26 (PANTHER); IPR000560 (PROSITE_PATTERNS); IPR000560 (PROSITE_PATTERNS); CYTOPLASMIC_DOMAIN (PHOBIUS); NON_CYTOPLASMIC_DOMAIN (PHOBIUS); TRANSMEMBRANE (PHOBIUS); SignalP-noTM (SIGNALP_EUK); IPR029033 (SUPERFAMILY); TMhelix (TMHMM) |
| 1457 | c30603_g43_i1_len_1388_path_6125_0_505_663_1_506_979_59586_980_1387_2                                   | 76   | prostatic acid phosphatase-like                   | 457 | 1.99E-122 | 63.60% | 0.456 Y | IPR000560 (PFAM); IPR029033 (G3DSA:3.40.50.GENE3D); PTHR11567 (PANTHER); PTHR11567:SF26 (PANTHER); IPR000560 (PROSITE_PATTERNS); IPR000560 (PROSITE_PATTERNS); NON_CYTOPLASMIC_DOMAIN (PHOBIUS); TRANSMEMBRANE (PHOBIUS); CYTOPLASMIC_DOMAIN (PHOBIUS); SignalP-noTM (SIGNALP_EUK); IPR029033 (SUPERFAMILY); TMhelix (TMHMM)                                                                                                                                                                                                                                                                                                                                                                                                                                                                                                                                                                                                                     |
| 1458 | c30603_g43_i2_len_1080_path_6125_0_505_663_1_506_979_7105_980_1037_7163_1038_1066_6_1575_1067_1079_2    | 77   | lysosomal acid phosphatase                        | 360 | 6.72E-102 | 66.80% | 0.456 Y | IPR000560 (PFAM); IPR029033 (G3DSA:3.40.50.GENE3D); PTHR11567 (PANTHER); PTHR11567:SF26 (PANTHER); IPR000560 (PROSITE_PATTERNS); IPR000560 (PROSITE_PATTERNS); NON_CYTOPLASMIC_DOMAIN (PHOBIUS); TRANSMEMBRANE (PHOBIUS); CYTOPLASMIC_DOMAIN (PHOBIUS); SignalP-noTM (SIGNALP_EUK); IPR029033 (SUPERFAMILY)                                                                                                                                                                                                                                                                                                                                                                                                                                                                                                                                                                                                                                      |
| 1459 | c30605_g3_i1_len_2413_path_7175_0_22_27573_23_31_27582_32_32_8149_33_78_8195_79_93_0_6868_931_2412_4    | 2941 | beta-galactosidase-1-like protein 2               | 799 | 0         | 64.10% | 0.103   | IPR001944 (PRINTS); IPR013781 (G3DSA:3.20.20.GENE3D); IPR001944 (PFAM); IPR008979 (G3DSA:2.60.120.GENE3D); PTHR23421:SF66 (PANTHER); IPR001944 (PANTHER); IPR019801 (PROSITE_PATTERNS); IPR008979 (SUPERFAMILY); IPR017853 (SUPERFAMILY)                                                                                                                                                                                                                                                                                                                                                                                                                                                                                                                                                                                                                                                                                                         |
| 1460 | c30615_g12_i1_len_1218_path_7349_0_794_426_4_795_818_4288_819_1217_1                                    | 122  | adrenodoxin                                       | 401 | 4.46E-51  | 77.70% | 0.112   | IPR001055 (PRINTS); IPR012675 (G3DSA:3.10.20.GENE3D); IPR001041 (PFAM); PTHR23426 (PANTHER); PTHR23426:SF21 (PANTHER); IPR018298 (PROSITE_PATTERNS); IPR001041 (PROSITE_PROFILES); IPR001041 (SUPERFAMILY)                                                                                                                                                                                                                                                                                                                                                                                                                                                                                                                                                                                                                                                                                                                                       |
| 1461 | c30619_g12_i2_len_1381_path_5381_0_350_573_2_351_1016_2147_1017_1380_3                                  | 129  | coiled-coil domain-containing protein 134-like    | 456 | 1.96E-52  | 65.00% | 0.266   | IPR026321 (PFAM); IPR026321 (PANTHER)                                                                                                                                                                                                                                                                                                                                                                                                                                                                                                                                                                                                                                                                                                                                                                                                                                                                                                            |
| 1462 | c30637_g6_i1_len_2291_path_499_0_70_16912_34_110_134_33631_135_141_33638_142_144_3_74_576_10589_577_3   | 568  | utp--glucose-1-phosphate uridylyltransferase-like | 764 | 0         | 84.40% | 0.108   | IPR002618 (PFAM); IPR029044 (G3DSA:3.90.550.GENE3D); IPR016267 (PTHR11952:PANTHER); IPR002618 (PANTHER); NON_CYTOPLASMIC_DOMAIN (PHOBIUS); NON_CYTOPLASMIC_DOMAIN (PHOBIUS); TRANSMEMBRANE (PHOBIUS); TRANSMEMBRANE (PHOBIUS); CYTOPLASMIC_DOMAIN (PHOBIUS); TRANSMEMBRANE (PHOBIUS); CYTOPLASMIC_DOMAIN (PHOBIUS); IPR029044 (SUPERFAMILY); TMhelix (TMHMM); TMhelix (TMHMM); TMhelix (TMHMM)                                                                                                                                                                                                                                                                                                                                                                                                                                                                                                                                                   |
| 1463 | c30640_g14_i1_len_1548_path_24478_0_109_25_34_110_134_33631_135_141_33638_142_144_3_3641_145_148_3364_1 | 121  | zinc finger protein 431-like isoform x2           | 510 | 4.26E-37  | 53.70% | 0.558 Y | IPR015880 (SMART); IPR013087 (G3DSA:3.30.160.GENE3D); IPR013087 (G3DSA:3.30.160.GENE3D); PF13465 (PFAM); PF13912 (PFAM); PTHR24409 (PANTHER); PTHR24409:SF13 (PANTHER); IPR007087 (PROSITE_PATTERNS); IPR007087 (PROSITE_PATTERNS); IPR007087 (PROSITE_PATTERNS); IPR007087 (PROSITE_PATTERNS); IPR007087 (PROSITE_PROFILES); IPR007087 (PROSITE_PROFILES); IPR007087 (PROSITE_PROFILES); IPR007087 (PROSITE_PROFILES); IPR007087 (PROSITE_PROFILES); SignalP-noTM (SIGNALP_EUK); SSF57667 (SUPERFAMILY); SSF57667 (SUPERFAMILY); SSF57667 (SUPERFAMILY)                                                                                                                                                                                                                                                                                                                                                                                         |
| 1464 | c30648_g7_i6_len_1898_path_28787_0_651_236_59_652_653_23661_654_1743_2500_1744_1893_33100_1894_1897_1   | 86   | dbh-like monooxygenase protein 1                  | 633 | 2.42E-29  | 50.50% | 0.108   | IPR014784 (G3DSA:2.60.120.GENE3D); PF03712 (PFAM); IPR000945 (PANTHER); IPR014783 (PROSITE_PATTERNS); NON_CYTOPLASMIC_DOMAIN (PHOBIUS); CYTOPLASMIC_DOMAIN (PHOBIUS); TRANSMEMBRANE (PHOBIUS); TRANSMEMBRANE (PHOBIUS); NON_CYTOPLASMIC_DOMAIN (PHOBIUS); IPR008977 (SUPERFAMILY)                                                                                                                                                                                                                                                                                                                                                                                                                                                                                                                                                                                                                                                                |

|      |                                                                                                        |         |                                                              |     |          |        |         |                                                                                                                                                                                                                                                                                                                                                                                                                                                                                                                                                                                                                                                                                                                                                                                                                                                                                                                                                                                                                                                                                                                                           |
|------|--------------------------------------------------------------------------------------------------------|---------|--------------------------------------------------------------|-----|----------|--------|---------|-------------------------------------------------------------------------------------------------------------------------------------------------------------------------------------------------------------------------------------------------------------------------------------------------------------------------------------------------------------------------------------------------------------------------------------------------------------------------------------------------------------------------------------------------------------------------------------------------------------------------------------------------------------------------------------------------------------------------------------------------------------------------------------------------------------------------------------------------------------------------------------------------------------------------------------------------------------------------------------------------------------------------------------------------------------------------------------------------------------------------------------------|
| 1465 | c30665_g17_i1_len_1278_path_4809_0_93_1527_4_94_551_975_552_573_20600_574_1277_5                       | 38      | zinc finger protein                                          | 426 | 4.69E-25 | 49.10% | 0.098   | IPR015880 (SMART); IPR007087 (PFAM); IPR013087 (G3DSA:3.30.160.GENE3D); PF13894 (PFAM); PTHR24375:SF106 (PANTHER); PTHR24375 (PANTHER); IPR007087 (PROSITE_PATTERNS); IPR007087 (PROSITE_PATTERNS); IPR007087 (PROSITE_PATTERNS); CYTOPLASMIC_DOMAIN (PHOBIUS); TRANSMEMBRANE (PHOBIUS); NON_CYTOPLASMIC_DOMAIN (PHOBIUS); IPR007087 (PROSITE_PROFILES); IPR007087 (PROSITE_PROFILES); IPR007087 (PROSITE_PROFILES); SSF57667 (SUPERFAMILY); SSF57667 (SUPERFAMILY); TMhelix (TMHMM)                                                                                                                                                                                                                                                                                                                                                                                                                                                                                                                                                                                                                                                      |
| 1466 | c30675_g2_i1_len_1456_path_8724_0_41_11362_42_61_8785_62_104_8827_105_107_5207_108_132_12171_133_14_4  | 434416  | low quality protein: suppressor of tumorigenicity 14 protein | 485 | 1.30E-81 | 53.10% | 0.102   | IPR002172 (PRINTS); IPR001254 (SMART); IPR002172 (SMART); IPR001254 (PFAM); G3DSA:2.40.10.10 (GENE3D); IPR002172 (PFAM); IPR002172 (G3DSA:4.10.400.GENE3D); IPR002172 (G3DSA:4.10.400.GENE3D); G3DSA:2.40.10.10 (GENE3D); IPR002172 (G3DSA:4.10.400.GENE3D); G3DSA:2.40.10.10 (GENE3D); PTHR24256 (PANTHER); IPR023415 (PROSITE_PATTERNS); IPR018114 (PROSITE_PATTERNS); IPR023415 (PROSITE_PATTERNS); IPR023415 (PROSITE_PATTERNS); IPR023415 (PROSITE_PATTERNS); IPR002172 (PROSITE_PROFILES); IPR002172 (PROSITE_PROFILES); IPR001254 (PROSITE_PROFILES); IPR002172 (PROSITE_PROFILES); IPR002172 (PROSITE_PROFILES); IPR002172 (SUPERFAMILY); IPR002172 (SUPERFAMILY); IPR009003 (SUPERFAMILY); IPR002172 (SUPERFAMILY)                                                                                                                                                                                                                                                                                                                                                                                                               |
| 1467 | c30675_g2_i2_len_1752_path_8724_0_41_8766_42_61_8785_62_104_5204_105_107_5207_108_132_8854_133_142_3   | 1228052 | suppressor of tumorigenicity 14 protein homolog              | 584 | 1.60E-82 | 52.20% | 0.754 Y | IPR002172 (PRINTS); IPR002172 (SMART); IPR001254 (SMART); IPR002172 (G3DSA:4.10.400.GENE3D); IPR002172 (PFAM); G3DSA:2.40.10.10 (GENE3D); IPR001254 (PFAM); G3DSA:2.40.10.10 (GENE3D); IPR002172 (G3DSA:4.10.400.GENE3D); IPR002172 (G3DSA:4.10.400.GENE3D); IPR002172 (G3DSA:4.10.400.GENE3D); G3DSA:2.40.10.10 (GENE3D); PTHR24256 (PANTHER); IPR023415 (PROSITE_PATTERNS); IPR023415 (PROSITE_PATTERNS); IPR018114 (PROSITE_PATTERNS); IPR018114 (PROSITE_PATTERNS); IPR023415 (PROSITE_PATTERNS); IPR023415 (PROSITE_PATTERNS); IPR023415 (PROSITE_PATTERNS); IPR023415 (PROSITE_PATTERNS); SIGNAL_PEPTIDE_H_REGION (PHOBIUS); SIGNAL_PEPTIDE (PHOBIUS); NON_CYTOPLASMIC_DOMAIN (PHOBIUS); SIGNAL_PEPTIDE_N_REGION (PHOBIUS); SIGNAL_PEPTIDE_C_REGION (PHOBIUS); IPR002172 (PROSITE_PROFILES); IPR002172 (PROSITE_PROFILES); IPR002172 (PROSITE_PROFILES); IPR002172 (PROSITE_PROFILES); IPR002172 (PROSITE_PROFILES); IPR001254 (PROSITE_PROFILES); SignalP-noTM (SIGNALP_EUK); IPR002172 (SUPERFAMILY); IPR002172 (SUPERFAMILY); IPR002172 (SUPERFAMILY); IPR009003 (SUPERFAMILY); IPR002172 (SUPERFAMILY); IPR002172 (SUPERFAMILY) |
| 1468 | c30675_g2_i3_len_1795_path_10781_0_128_109_10_129_164_10946_165_197_2027_198_234_14_475_235_245_2075_4 | 1612752 | suppressor of tumorigenicity 14 partial                      | 591 | 5.32E-80 | 52.40% | 0.440 Y | IPR002172 (PRINTS); IPR002172 (SMART); IPR001254 (SMART); IPR002172 (G3DSA:4.10.400.GENE3D); G3DSA:2.40.10.10 (GENE3D); IPR002172 (G3DSA:4.10.400.GENE3D); IPR002172 (G3DSA:4.10.400.GENE3D); IPR001254 (PFAM); G3DSA:2.40.10.10 (GENE3D); IPR002172 (PFAM); IPR002172 (G3DSA:4.10.400.GENE3D); G3DSA:2.40.10.10 (GENE3D); PTHR24256 (PANTHER); IPR023415 (PROSITE_PATTERNS); IPR023415 (PROSITE_PATTERNS); IPR023415 (PROSITE_PATTERNS); IPR023415 (PROSITE_PATTERNS); IPR018114 (PROSITE_PATTERNS); IPR018114 (PROSITE_PATTERNS); NON_CYTOPLASMIC_DOMAIN (PHOBIUS); TRANSMEMBRANE (PHOBIUS); CYTOPLASMIC_DOMAIN (PHOBIUS); IPR002172 (PROSITE_PROFILES); IPR002172 (PROSITE_PROFILES); IPR001254 (PROSITE_PROFILES); IPR002172 (PROSITE_PROFILES); IPR002172 (PROSITE_PROFILES); IPR002172 (PROSITE_PROFILES); IPR002172 (SUPERFAMILY); IPR002172 (SUPERFAMILY); IPR002172 (SUPERFAMILY); IPR002172 (SUPERFAMILY); IPR009003 (SUPERFAMILY)                                                                                                                                                                                              |

|      |                                                                                                              |        |                                                                         |     |          |        |         |                                                                                                                                                                                                                                                                                                                                                                                                                                                                                                                                                                                                                                                                                                                                                                                    |
|------|--------------------------------------------------------------------------------------------------------------|--------|-------------------------------------------------------------------------|-----|----------|--------|---------|------------------------------------------------------------------------------------------------------------------------------------------------------------------------------------------------------------------------------------------------------------------------------------------------------------------------------------------------------------------------------------------------------------------------------------------------------------------------------------------------------------------------------------------------------------------------------------------------------------------------------------------------------------------------------------------------------------------------------------------------------------------------------------|
| 1469 | c30675_g2_i4_len_1508_path_10781_0_128_109<br>10_129_164_10946_165_197_2027_198_234_14<br>475_235_245_2075_5 | 933783 | suppressor of tumorigenicity 14 protein                                 | 495 | 8.84E-80 | 53.10% | 0.109   | IPR002172 (PRINTS); IPR002172 (SMART); IPR001254 (SMART); IPR002172 (G3DSA:4.10.400.GENE3D); G3DSA:2.40.10.10 (GENE3D); G3DSA:2.40.10.10 (GENE3D); G3DSA:2.40.10.10 (GENE3D); IPR002172 (PFAM); IPR002172 (G3DSA:4.10.400.GENE3D); IPR001254 (PFAM); IPR002172 (G3DSA:4.10.400.GENE3D); PTHR24256 (PANTHER); IPR018114 (PROSITE_PATTERNS); IPR023415 (PROSITE_PATTERNS); IPR023415 (PROSITE_PATTERNS); IPR023415 (PROSITE_PATTERNS); IPR018114 (PROSITE_PATTERNS); IPR023415 (PROSITE_PATTERNS); IPR002172 (PROSITE_PROFILES); IPR002172 (PROSITE_PROFILES); IPR002172 (PROSITE_PROFILES); IPR002172 (PROSITE_PROFILES); IPR001254 (PROSITE_PROFILES); IPR002172 (SUPERFAMILY); IPR009003 (SUPERFAMILY); IPR002172 (SUPERFAMILY); IPR002172 (SUPERFAMILY); IPR002172 (SUPERFAMILY) |
| 1470 | c30690_g6_i4_len_1954_path_2511_0_1682_208<br>00_1683_1686_21459_1687_1693_12270_1694_1953_1                 | 104    | cd109 antigen-like isoform x1                                           | 644 | 0        | 75.20% | 0.168   | IPR011626 (PFAM); IPR009048 (G3DSA:2.60.40.GENE3D); IPR008930 (G3DSA:1.50.10.GENE3D); IPR009048 (PFAM); PTHR11412:SF84 (PANTHER); PTHR11412 (PANTHER); NON_CYTOPLASMIC_DOMAIN (PHOBIUS); TRANSMEMBRANE (PHOBIUS); TRANSMEMBRANE (PHOBIUS); CYTOPLASMIC_DOMAIN (PHOBIUS); TRANSMEMBRANE (PHOBIUS); CYTOPLASMIC_DOMAIN (PHOBIUS); NON_CYTOPLASMIC_DOMAIN (PHOBIUS); IPR008930 (SUPERFAMILY); IPR009048 (SUPERFAMILY); TMhelix (TMHMM); TMhelix (TMHMM); TMhelix (TMHMM)                                                                                                                                                                                                                                                                                                              |
| 1471 | c30690_g6_i5_len_2961_path_2511_0_1682_208<br>00_1683_1686_4197_1687_1704_4215_1705_1861_4371_1862_1872_1    | 176    | cd109 antigen-like isoform x1                                           | 987 | 0        | 76.70% | 0.168   | IPR009048 (G3DSA:2.60.40.GENE3D); IPR009048 (PFAM); IPR011626 (PFAM); IPR008930 (G3DSA:1.50.10.GENE3D); PTHR11412 (PANTHER); PTHR11412:SF84 (PANTHER); CYTOPLASMIC_DOMAIN (PHOBIUS); CYTOPLASMIC_DOMAIN (PHOBIUS); NON_CYTOPLASMIC_DOMAIN (PHOBIUS); TRANSMEMBRANE (PHOBIUS); TRANSMEMBRANE (PHOBIUS); TRANSMEMBRANE (PHOBIUS); NON_CYTOPLASMIC_DOMAIN (PHOBIUS); IPR008930 (SUPERFAMILY); IPR009048 (SUPERFAMILY); TMhelix (TMHMM); TMhelix (TMHMM)                                                                                                                                                                                                                                                                                                                               |
| 1472 | c30693_g3_i1_len_342_path_23746_0_2_23751_3_20_23361_21_21_14650_22_69_14698_70_88_23425_89_98_2343_4        | 0      | hypothetical protein Y032_0655g1201                                     | 114 | 2.94E-06 | 66.67% | 0.115   | no IPS match                                                                                                                                                                                                                                                                                                                                                                                                                                                                                                                                                                                                                                                                                                                                                                       |
| 1473 | c30709_g7_i1_len_1162_path_7009_0_820_7830_821_844_11719_845_1161_3                                          | 53     | basement membrane-specific heparan sulfate proteoglycan core isoform x4 | 382 | 1.27E-86 | 77.00% | 0.135   | IPR013106 (SMART); IPR003599 (SMART); IPR003598 (SMART); IPR013783 (G3DSA:2.60.40.GENE3D); IPR013106 (PFAM); IPR013098 (PFAM); IPR013783 (G3DSA:2.60.40.GENE3D); PTHR23279 (PANTHER); CYTOPLASMIC_DOMAIN (PHOBIUS); NON_CYTOPLASMIC_DOMAIN (PHOBIUS); TRANSMEMBRANE (PHOBIUS); IPR007110 (PROSITE_PROFILES); IPR007110 (PROSITE_PROFILES); SSF48726 (SUPERFAMILY); SSF48726 (SUPERFAMILY)                                                                                                                                                                                                                                                                                                                                                                                          |
| 1474 | c30733_g7_i2_len_1607_path_18226_0_580_188_06_581_608_6218_609_1517_19742_1518_1606_0                        | 97     | muscle-specific protein 20                                              | 536 | 6.15E-88 | 86.20% | 0.531 Y | IPR003096 (PRINTS); IPR001997 (PRINTS); IPR001715 (SMART); IPR000557 (PFAM); IPR001715 (PFAM); IPR001715 (G3DSA:1.10.418.GENE3D); PTHR18959:SF51 (PANTHER); PTHR18959 (PANTHER); TRANSMEMBRANE (PHOBIUS); NON_CYTOPLASMIC_DOMAIN (PHOBIUS); TRANSMEMBRANE (PHOBIUS); NON_CYTOPLASMIC_DOMAIN (PHOBIUS); CYTOPLASMIC_DOMAIN (PHOBIUS); CYTOPLASMIC_DOMAIN (PHOBIUS); TRANSMEMBRANE (PHOBIUS); TRANSMEMBRANE (PHOBIUS); NON_CYTOPLASMIC_DOMAIN (PHOBIUS); IPR001715 (PROSITE_PROFILES); IPR000557 (PROSITE_PROFILES); SignalP-noTM (SIGNALP_EUK); IPR001715 (SUPERFAMILY)                                                                                                                                                                                                             |
| 1475 | c3074_g1_i1_len_2164_path_53_0_2163_2                                                                        | 63     | n-acetylgalactosamine-6-sulfatase isoform x1                            | 715 | 0        | 70.50% | 0.097   | PF14707 (PFAM); IPR000917 (PFAM); G3DSA:3.30.1120.10 (GENE3D); IPR017849 (G3DSA:3.40.720.GENE3D); IPR017849 (G3DSA:3.40.720.GENE3D); PTHR10342:SF27 (PANTHER); PTHR10342 (PANTHER); IPR024607 (PROSITE_PATTERNS); CYTOPLASMIC_DOMAIN (PHOBIUS); CYTOPLASMIC_DOMAIN (PHOBIUS); TRANSMEMBRANE (PHOBIUS); NON_CYTOPLASMIC_DOMAIN (PHOBIUS); TRANSMEMBRANE (PHOBIUS); TRANSMEMBRANE (PHOBIUS); CYTOPLASMIC_DOMAIN (PHOBIUS); NON_CYTOPLASMIC_DOMAIN (PHOBIUS); TRANSMEMBRANE (PHOBIUS); IPR017850 (SUPERFAMILY)                                                                                                                                                                                                                                                                        |





|      |                                                                                                        |      |                                                                 |     |           |        |       |                                                                                                                                                                                                                                                                                                                                                                                                                                                                                                                                                                                                                                                                                                                                            |
|------|--------------------------------------------------------------------------------------------------------|------|-----------------------------------------------------------------|-----|-----------|--------|-------|--------------------------------------------------------------------------------------------------------------------------------------------------------------------------------------------------------------------------------------------------------------------------------------------------------------------------------------------------------------------------------------------------------------------------------------------------------------------------------------------------------------------------------------------------------------------------------------------------------------------------------------------------------------------------------------------------------------------------------------------|
| 1484 | c30779_g6_i3_len_1519_path_10524_0_1301_11_820_1302_1302_2862_1303_1326_19535_1327_1337_18710_1338_1_4 | 86   | 39s ribosomal protein mitochondrial                             | 500 | 1.13E-141 | 68.70% | 0.258 | IPR008914 (G3DSA:3.90.280.GENE3D); IPR008914 (PFAM); PTHR11362:SF16 (PANTHER); PTHR11362 (PANTHER); IPR008914 (SUPERFAMILY)                                                                                                                                                                                                                                                                                                                                                                                                                                                                                                                                                                                                                |
| 1485 | c30779_g6_i6_len_1526_path_10524_0_1301_11_820_1302_1302_2862_1303_1326_19535_1327_1337_18710_1338_1_5 | 94   | 39s ribosomal protein mitochondrial                             | 502 | 7.37E-142 | 68.70% | 0.139 | IPR008914 (PFAM); IPR008914 (G3DSA:3.90.280.GENE3D); PTHR11362 (PANTHER); PTHR11362:SF16 (PANTHER); IPR008914 (SUPERFAMILY)                                                                                                                                                                                                                                                                                                                                                                                                                                                                                                                                                                                                                |
| 1486 | c30785_g27_i1_len_700_path_39635_0_2_39638_3_4_39640_5_11_14214_12_699_1                               | 41   | epididymal secretory protein e1                                 | 218 | 6.28E-24  | 58.90% | 0.283 | IPR003172 (SMART); IPR003172 (PFAM); IPR003172 (G3DSA:2.60.40.GENE3D); PTHR11306:SF3 (PANTHER); PTHR11306 (PANTHER); IPR014756 (SUPERFAMILY)                                                                                                                                                                                                                                                                                                                                                                                                                                                                                                                                                                                               |
| 1487 | c30796_g1_i1_len_1068_path_139_0_56_12713_57_71_12728_72_87_976_88_174_12814_175_1_75_12815_176_187_0  | 40   | 5 -nucleotidase                                                 | 356 | 2.67E-76  | 81.30% | 0.125 | IPR029052 (G3DSA:3.60.21.GENE3D); IPR006179 (PANTHER); PTHR11575:SF7 (PANTHER); TRANSMEMBRANE (PHOBIUS); NON_CYTOPLASMIC_DOMAIN (PHOBIUS); CYTOPLASMIC_DOMAIN (PHOBIUS); IPR029052 (SUPERFAMILY)                                                                                                                                                                                                                                                                                                                                                                                                                                                                                                                                           |
| 1488 | c30809_g14_i2_len_466_path_16491_0_222_108_65_223_465_4                                                | 5    | agap002578-pa-like protein                                      | 149 | 1.57E-57  | 85.90% | 0.109 | IPR027359 (G3DSA:1.20.120.GENE3D); IPR005821 (PFAM); IPR005447 (PTHR10037:PANTHER); PTHR10037 (PANTHER); CYTOPLASMIC_DOMAIN (PHOBIUS); TRANSMEMBRANE (PHOBIUS); NON_CYTOPLASMIC_DOMAIN (PHOBIUS); TRANSMEMBRANE (PHOBIUS); TRANSMEMBRANE (PHOBIUS); CYTOPLASMIC_DOMAIN (PHOBIUS); NON_CYTOPLASMIC_DOMAIN (PHOBIUS); SSF81324 (SUPERFAMILY)                                                                                                                                                                                                                                                                                                                                                                                                 |
| 1489 | c30818_g8_i1_len_2855_path_34544_0_0_26742_1_1426_25878_1427_1527_28268_1528_2854_4                    | 238  | sparc-related modular calcium-binding protein 1-like isoform x2 | 952 | 2.09E-123 | 56.80% | 0.105 | IPR000716 (SMART); IPR002350 (SMART); IPR002350 (PFAM); IPR000716 (PFAM); G3DSA:3.30.60.30 (GENE3D); IPR011992 (G3DSA:1.10.238.GENE3D); IPR000716 (G3DSA:4.10.800.GENE3D); IPR019577 (PFAM); PTHR12352 (PANTHER); PTHR12352:SF3 (PANTHER); IPR018247 (PROSITE_PATTERNS); IPR000716 (PROSITE_PATTERNS); IPR000716 (PROSITE_PATTERNS); IPR018247 (PROSITE_PATTERNS); TRANSMEMBRANE (PHOBIUS); TRANSMEMBRANE (PHOBIUS); NON_CYTOPLASMIC_DOMAIN (PHOBIUS); NON_CYTOPLASMIC_DOMAIN (PHOBIUS); CYTOPLASMIC_DOMAIN (PHOBIUS); IPR000716 (PROSITE_PROFILES); IPR002350 (PROSITE_PROFILES); IPR000716 (PROSITE_PROFILES); IPR000716 (SUPERFAMILY); SSF47473 (SUPERFAMILY); IPR000716 (SUPERFAMILY); SSF100895 (SUPERFAMILY); SSF47473 (SUPERFAMILY) |
| 1490 | c30818_g8_i2_len_1667_path_25639_0_238_258_78_239_339_28268_340_1666_4                                 | 79   | sparc-related modular calcium-binding protein 1-like isoform x2 | 556 | 2.33E-124 | 57.10% | 0.105 | IPR000716 (SMART); IPR002350 (SMART); IPR000716 (G3DSA:4.10.800.GENE3D); IPR019577 (PFAM); G3DSA:3.30.60.30 (GENE3D); IPR000716 (PFAM); IPR002350 (PFAM); IPR011992 (G3DSA:1.10.238.GENE3D); PTHR12352 (PANTHER); PTHR12352:SF3 (PANTHER); IPR018247 (PROSITE_PATTERNS); IPR000716 (PROSITE_PATTERNS); IPR018247 (PROSITE_PATTERNS); IPR000716 (PROSITE_PROFILES); IPR000716 (PROSITE_PROFILES); IPR002350 (PROSITE_PROFILES); SSF47473 (SUPERFAMILY); IPR000716 (SUPERFAMILY); SSF100895 (SUPERFAMILY); IPR000716 (SUPERFAMILY); SSF47473 (SUPERFAMILY)                                                                                                                                                                                   |
| 1491 | c30823_g14_i1_len_662_path_15372_0_371_208_37_372_382_20949_383_385_20954_386_661_0                    | 6    | unknown                                                         | 221 | 3.23E-07  | 56.00% | 0.121 | IPR000477 (PFAM); NON_CYTOPLASMIC_DOMAIN (PHOBIUS); TRANSMEMBRANE (PHOBIUS); TRANSMEMBRANE (PHOBIUS); TRANSMEMBRANE (PHOBIUS); CYTOPLASMIC_DOMAIN (PHOBIUS); NON_CYTOPLASMIC_DOMAIN (PHOBIUS); CYTOPLASMIC_DOMAIN (PHOBIUS); CYTOPLASMIC_DOMAIN (PHOBIUS); TRANSMEMBRANE (PHOBIUS); IPR000742 (PROSITE_PROFILES); TMhelix (TMHMM); TMhelix (TMHMM)                                                                                                                                                                                                                                                                                                                                                                                         |
| 1492 | c30906_g1_i1_len_1956_path_1_0_1955_0                                                                  | 1140 | adp-ribosylation factor 1                                       | 652 | 1.08E-126 | 98.50% | 0.11  | IPR006689 (PRINTS); IPR003579 (SMART); IPR006687 (SMART); IPR024156 (SMART); IPR027417 (G3DSA:3.40.50.GENE3D); IPR006689 (PFAM); IPR005225 (TIGRFAM); PTHR11711:SF118 (PANTHER); PTHR11711 (PANTHER); TRANSMEMBRANE (PHOBIUS); CYTOPLASMIC_DOMAIN (PHOBIUS); NON_CYTOPLASMIC_DOMAIN (PHOBIUS); CYTOPLASMIC_DOMAIN (PHOBIUS); NON_CYTOPLASMIC_DOMAIN (PHOBIUS); TRANSMEMBRANE (PHOBIUS); TRANSMEMBRANE (PHOBIUS); NON_CYTOPLASMIC_DOMAIN (PHOBIUS); CYTOPLASMIC_DOMAIN (PHOBIUS); TRANSMEMBRANE (PHOBIUS); TRANSMEMBRANE (PHOBIUS); IPR024156 (PROSITE_PROFILES); IPR027417 (SUPERFAMILY); TMhelix (TMHMM); TMhelix (TMHMM); TMhelix (TMHMM)                                                                                                |

|      |                                          |      |                                                  |     |           |         |         |                                                                                                                                                                                                                                                                                                                                                                                                                                                                                                                                    |
|------|------------------------------------------|------|--------------------------------------------------|-----|-----------|---------|---------|------------------------------------------------------------------------------------------------------------------------------------------------------------------------------------------------------------------------------------------------------------------------------------------------------------------------------------------------------------------------------------------------------------------------------------------------------------------------------------------------------------------------------------|
| 1493 | c30930_g1_i1_len_1434_path_1412_0_1433_2 | 6308 | virulence metalloprotease                        | 471 | 2.84E-16  | 54.20%  | 0.13    | IPR025711 (PFAM); NON_CYTOPLASMIC_DOMAIN (PHOBIUS); TRANSMEMBRANE (PHOBIUS); TRANSMEMBRANE (PHOBIUS); CYTOPLASMIC_DOMAIN (PHOBIUS); TRANSMEMBRANE (PHOBIUS); CYTOPLASMIC_DOMAIN (PHOBIUS); NON_CYTOPLASMIC_DOMAIN (PHOBIUS); NON_CYTOPLASMIC_DOMAIN (PHOBIUS); TRANSMEMBRANE (PHOBIUS); TRANSMEMBRANE (PHOBIUS); CYTOPLASMIC_DOMAIN (PHOBIUS); TMhelix (TMHMM); TMhelix (TMHMM); TMhelix (TMHMM); TMhelix (TMHMM)                                                                                                                  |
| 1494 | c30934_g1_i1_len_2590_path_1_0_2589_2    | 82   | aminopeptidase n                                 | 863 | 0         | 100.00% | 0.375 Y | IPR014782 (PRINTS); IPR012779 (TIGRFAM); IPR024601 (PFAM); IPR024601 (G3DSA:1.25.50.GENE3D); IPR014782 (PFAM); G3DSA:1.10.390.10 (GENE3D); IPR001930 (PANTHER); PTHR11533:SF152 (PANTHER); SSF63737 (SUPERFAMILY); SSF55486 (SUPERFAMILY)                                                                                                                                                                                                                                                                                          |
| 1495 | c30963_g1_i1_len_2256_path_1_0_2255_2    | 67   | lachesin-like isoform x1                         | 752 | 4.06E-86  | 73.00%  | 0.285   | IPR003598 (SMART); IPR003599 (SMART); IPR013098 (PFAM); IPR013783 (G3DSA:2.60.40.GENE3D); PTHR23279:SF12 (PANTHER); PTHR23279 (PANTHER); TRANSMEMBRANE (PHOBIUS); CYTOPLASMIC_DOMAIN (PHOBIUS); NON_CYTOPLASMIC_DOMAIN (PHOBIUS); IPR007110 (PROSITE_PROFILES); IPR007110 (PROSITE_PROFILES); SSF48726 (SUPERFAMILY); SSF48726 (SUPERFAMILY); TMhelix (TMHMM)                                                                                                                                                                      |
| 1496 | c31076_g1_i1_len_1748_path_1726_0_1747_2 | 91   | integrin-linked protein kinase                   | 582 | 0         | 87.10%  | 0.229   | IPR002110 (SMART); IPR002110 (PFAM); G3DSA:1.10.510.10 (GENE3D); IPR001245 (PFAM); IPR020683 (G3DSA:1.25.40.GENE3D); IPR020683 (PFAM); G3DSA:3.30.200.20 (GENE3D); PTHR23257 (PANTHER); PTHR23257:SF30 (PANTHER); CYTOPLASMIC_DOMAIN (PHOBIUS); NON_CYTOPLASMIC_DOMAIN (PHOBIUS); TRANSMEMBRANE (PHOBIUS); IPR020683 (PROSITE_PROFILES); IPR000719 (PROSITE_PROFILES); IPR002110 (PROSITE_PROFILES); IPR002110 (PROSITE_PROFILES); IPR002110 (PROSITE_PROFILES); IPR011009 (SUPERFAMILY); IPR020683 (SUPERFAMILY); TMhelix (TMHMM) |
| 1497 | c31104_g1_i1_len_684_path_1_0_683_1      | 8    | udp-n-acetyl-d-mannosaminuronic acid transferase | 228 | 3.42E-142 | 99.30%  | 0.114   | IPR004629 (PFAM); IPR004629 (TIGRFAM)                                                                                                                                                                                                                                                                                                                                                                                                                                                                                              |
| 1498 | c31234_g1_i1_len_786_path_1_0_785_2      | 9    | hypothetical protein L798_00519                  | 262 | 1.75E-30  | 50.20%  | 0.101   | IPR002157 (PFAM); IPR008930 (G3DSA:1.50.10.GENE3D); PTHR10559:SF12 (PANTHER); IPR002157 (PANTHER); IPR008930 (SUPERFAMILY)                                                                                                                                                                                                                                                                                                                                                                                                         |
| 1499 | c31319_g1_i1_len_889_path_1_0_888_0      | 63   | hemagglutinin amebocyte aggregation factor-like  | 297 | 1.29E-29  | 57.60%  | 0.269   | PF14704 (PFAM); IPR026645 (PANTHER); NON_CYTOPLASMIC_DOMAIN (PHOBIUS); TRANSMEMBRANE (PHOBIUS); CYTOPLASMIC_DOMAIN (PHOBIUS); TRANSMEMBRANE (PHOBIUS); NON_CYTOPLASMIC_DOMAIN (PHOBIUS); CYTOPLASMIC_DOMAIN (PHOBIUS); TRANSMEMBRANE (PHOBIUS)                                                                                                                                                                                                                                                                                     |
| 1500 | c31501_g1_i1_len_887_path_1_0_886_3      | 15   | serine protease easter-like                      | 296 | 1.23E-40  | 59.30%  | 0.171   | IPR001314 (PRINTS); IPR001254 (SMART); G3DSA:2.40.10.10 (GENE3D); IPR001254 (PFAM); G3DSA:2.40.10.10 (GENE3D); PTHR24268:SF54 (PANTHER); PTHR24268 (PANTHER); IPR018114 (PROSITE_PATTERNS); IPR001254 (PROSITE_PROFILES); IPR009003 (SUPERFAMILY)                                                                                                                                                                                                                                                                                  |
| 1501 | c31501_g1_i1_len_887_path_1_0_886_4      | 15   | serine protease easter                           | 296 | 7.05E-16  | 71.20%  | 0.139   | G3DSA:2.40.10.10 (GENE3D); IPR001254 (PFAM); G3DSA:2.40.10.10 (GENE3D); PTHR24260 (PANTHER); PTHR24260:SF3 (PANTHER); IPR018114 (PROSITE_PATTERNS); CYTOPLASMIC_DOMAIN (PHOBIUS); NON_CYTOPLASMIC_DOMAIN (PHOBIUS); TRANSMEMBRANE (PHOBIUS); IPR001254 (PROSITE_PROFILES); IPR009003 (SUPERFAMILY); TMhelix (TMHMM)                                                                                                                                                                                                                |
| 1502 | c31508_g1_i1_len_1184_path_1_0_1183_2    | 28   | threonine synthase-like 2                        | 394 | 7.16E-106 | 73.10%  | 0.634 Y | IPR029144 (PFAM); G3DSA:3.40.50.1100 (GENE3D); IPR029144 (G3DSA:3.90.1380.GENE3D); PTHR10314 (PANTHER); IPR027457 (PTHR10314:PANTHER); SIGNAL_PEPTIDE_H_REGION (PHOBIUS); SIGNAL_PEPTIDE_C_REGION (PHOBIUS); NON_CYTOPLASMIC_DOMAIN (PHOBIUS); SIGNAL_PEPTIDE (PHOBIUS); SIGNAL_PEPTIDE_N_REGION (PHOBIUS); SignalP-noTM (SIGNALP_EUK); IPR001926 (SUPERFAMILY)                                                                                                                                                                    |
| 1503 | c31650_g1_i1_len_549_path_527_0_548_0    | 8    | wnt8-like protein 1                              | 178 | 3.31E-34  | 65.60%  | 0.1     | IPR005817 (SMART); IPR005817 (PFAM); IPR005817 (PANTHER); IPR026540 (PTHR12027:PANTHER); NON_CYTOPLASMIC_DOMAIN (PHOBIUS); TRANSMEMBRANE (PHOBIUS); CYTOPLASMIC_DOMAIN (PHOBIUS)                                                                                                                                                                                                                                                                                                                                                   |
| 1504 | c31656_g1_i1_len_1551_path_1529_0_1550_1 | 59   | folate receptor alpha-like                       | 512 | 3.59E-80  | 68.10%  | 0.299   | IPR018143 (PFAM); PTHR10517:SF3 (PANTHER); IPR004269 (PANTHER); TRANSMEMBRANE (PHOBIUS); NON_CYTOPLASMIC_DOMAIN (PHOBIUS); NON_CYTOPLASMIC_DOMAIN (PHOBIUS); TRANSMEMBRANE (PHOBIUS); TRANSMEMBRANE (PHOBIUS); TRANSMEMBRANE (PHOBIUS); CYTOPLASMIC_DOMAIN (PHOBIUS); NON_CYTOPLASMIC_DOMAIN (PHOBIUS); TMhelix (TMHMM); TMhelix (TMHMM); TMhelix (TMHMM)                                                                                                                                                                          |

|      |                                                               |    |                                                  |     |           |        |       |                                                                                                                                                                                                                                                                                                                                                                                                                                                                                                                                                                                                                                                                                                                                 |
|------|---------------------------------------------------------------|----|--------------------------------------------------|-----|-----------|--------|-------|---------------------------------------------------------------------------------------------------------------------------------------------------------------------------------------------------------------------------------------------------------------------------------------------------------------------------------------------------------------------------------------------------------------------------------------------------------------------------------------------------------------------------------------------------------------------------------------------------------------------------------------------------------------------------------------------------------------------------------|
| 1505 | c3168_g1_i1_len_1934_path_363_0_784_23_785_942_181_943_1933_0 | 95 | prenylcysteine oxidase-like                      | 645 | 2.58E-58  | 56.70% | 0.237 | IPR010795 (PFAM); IPR017046 (PANTHER); CYTOPLASMIC_DOMAIN (PHOBIUS); TRANSMEMBRANE (PHOBIUS); NON_CYTOPLASMIC_DOMAIN (PHOBIUS)                                                                                                                                                                                                                                                                                                                                                                                                                                                                                                                                                                                                  |
| 1506 | c3168_g1_i1_len_1934_path_363_0_784_23_785_942_181_943_1933_1 | 95 | prenylcysteine oxidase-like                      | 645 | 3.83E-57  | 64.10% | 0.173 | PF13450 (PFAM); IPR010795 (PFAM); G3DSA:3.50.50.60 (GENE3D); IPR017046 (PANTHER); CYTOPLASMIC_DOMAIN (PHOBIUS); TRANSMEMBRANE (PHOBIUS); CYTOPLASMIC_DOMAIN (PHOBIUS); NON_CYTOPLASMIC_DOMAIN (PHOBIUS); TRANSMEMBRANE (PHOBIUS); TRANSMEMBRANE (PHOBIUS); NON_CYTOPLASMIC_DOMAIN (PHOBIUS); SSF51905 (SUPERFAMILY)                                                                                                                                                                                                                                                                                                                                                                                                             |
| 1507 | c3168_g1_i2_len_1776_path_363_0_784_181_785_1775_1            | 86 | prenylcysteine oxidase-like                      | 592 | 1.12E-137 | 59.30% | 0.173 | PF13450 (PFAM); G3DSA:3.50.50.60 (GENE3D); IPR010795 (PFAM); IPR017046 (PANTHER); SSF51905 (SUPERFAMILY)                                                                                                                                                                                                                                                                                                                                                                                                                                                                                                                                                                                                                        |
| 1508 | c31681_g1_i1_len_2123_path_2101_0_2122_4                      | 64 | zinc finger protein 226 isoform x1               | 702 | 2.22E-47  | 56.70% | 0.108 | IPR015880 (SMART); IPR013087 (G3DSA:3.30.160.GENE3D); PF13465 (PFAM); IPR013087 (G3DSA:3.30.160.GENE3D); IPR013087 (G3DSA:3.30.160.GENE3D); IPR007087 (PFAM); IPR013087 (G3DSA:3.30.160.GENE3D); IPR013087 (G3DSA:3.30.160.GENE3D); PTHR24409 (PANTHER); IPR007087 (PROSITE_PATTERNS); IPR007087 (PROSITE_PATTERNS); IPR007087 (PROSITE_PATTERNS); IPR007087 (PROSITE_PATTERNS); IPR007087 (PROSITE_PATTERNS); IPR007087 (PROSITE_PROFILES); SSF57667 (SUPERFAMILY); SSF57667 (SUPERFAMILY); SSF57667 (SUPERFAMILY); SSF57667 (SUPERFAMILY) |
| 1509 | c31703_g1_i1_len_471_path_1_0_470_3                           | 2  | carbohydrate sulfotransferase 11-like isoform x1 | 154 | 2.11E-31  | 67.90% | 0.108 | IPR005331 (PFAM); PTHR12137:SF30 (PANTHER); IPR018011 (PANTHER)                                                                                                                                                                                                                                                                                                                                                                                                                                                                                                                                                                                                                                                                 |
| 1510 | c31764_g1_i1_len_878_path_1_0_877_3                           | 5  | zinc finger protein 239-like                     | 293 | 6.25E-26  | 59.20% | 0.157 | IPR015880 (SMART); G3DSA:3.30.710.10 (GENE3D); IPR013087 (G3DSA:3.30.160.GENE3D); IPR013087 (G3DSA:3.30.160.GENE3D); IPR007087 (PFAM); IPR013069 (PFAM); PF13465 (PFAM); IPR013087 (G3DSA:3.30.160.GENE3D); PTHR24409 (PANTHER); IPR007087 (PROSITE_PATTERNS); IPR007087 (PROSITE_PATTERNS); IPR007087 (PROSITE_PATTERNS); IPR007087 (PROSITE_PATTERNS); IPR007087 (PROSITE_PROFILES); IPR000210 (PROSITE_PROFILES); IPR007087 (PROSITE_PROFILES); IPR007087 (PROSITE_PROFILES); IPR007087 (PROSITE_PROFILES); IPR011333 (SUPERFAMILY); SSF57667 (SUPERFAMILY); SSF57667 (SUPERFAMILY); SSF57667 (SUPERFAMILY)                                                                                                                  |
| 1511 | c31845_g1_i1_len_727_path_1_0_726_3                           | 6  | zinc finger protein 271-like                     | 243 | 1.73E-49  | 55.80% | 0.098 | IPR015880 (SMART); IPR007087 (PFAM); IPR013087 (G3DSA:3.30.160.GENE3D); IPR013087 (G3DSA:3.30.160.GENE3D); PF13912 (PFAM); IPR013087 (G3DSA:3.30.160.GENE3D); PF13465 (PFAM); PTHR24409 (PANTHER); IPR007087 (PROSITE_PATTERNS); IPR007087 (PROSITE_PATTERNS); IPR007087 (PROSITE_PATTERNS); IPR007087 (PROSITE_PATTERNS); IPR007087 (PROSITE_PATTERNS); IPR007087 (PROSITE_PATTERNS); IPR007087 (PROSITE_PROFILES); IPR007087 (PROSITE_PROFILES); IPR007087 (PROSITE_PROFILES); IPR007087 (PROSITE_PROFILES); IPR007087 (PROSITE_PROFILES); SSF57667 (SUPERFAMILY); SSF57667 (SUPERFAMILY); SSF57667 (SUPERFAMILY); SSF57667 (SUPERFAMILY)                                                                                     |
| 1512 | c31914_g1_i1_len_896_path_1_0_895_0                           | 53 | spermatogenesis-associated protein 5             | 293 | 4.49E-141 | 82.30% | 0.104 | Coil (COILS); IPR003593 (SMART); IPR027417 (G3DSA:3.40.50.GENE3D); IPR003959 (PFAM); G3DSA:1.10.8.60 (GENE3D); PTHR23077 (PANTHER); PTHR23077:SF27 (PANTHER); IPR003960 (PROSITE_PATTERNS); IPR027417 (SUPERFAMILY)                                                                                                                                                                                                                                                                                                                                                                                                                                                                                                             |

|      |                                                                                                  |     |                                                            |     |           |        |       |                                                                                                                                                                                                                                                                                                                                                                                                                                                                                                                                                                                                                                                                                  |
|------|--------------------------------------------------------------------------------------------------|-----|------------------------------------------------------------|-----|-----------|--------|-------|----------------------------------------------------------------------------------------------------------------------------------------------------------------------------------------------------------------------------------------------------------------------------------------------------------------------------------------------------------------------------------------------------------------------------------------------------------------------------------------------------------------------------------------------------------------------------------------------------------------------------------------------------------------------------------|
| 1513 | c32007_g2_i1_len_1594_path_2302_0_940_3243_941_942_3245_943_1029_3332_1030_1053_3528_1054_1593_1 | 52  | zinc finger protein                                        | 531 | 6.91E-41  | 54.60% | 0.098 | IPR015880 (SMART); IPR013087 (G3DSA:3.30.160.GENE3D); IPR013087 (G3DSA:3.30.160.GENE3D); PF13894 (PFAM); IPR007087 (PFAM); IPR013087 (G3DSA:3.30.160.GENE3D); PF13465 (PFAM); IPR013087 (G3DSA:3.30.160.GENE3D); PTHR24409:SF14 (PANTHER); PTHR24409 (PANTHER); IPR007087 (PROSITE_PATTERNS); IPR007087 (PROSITE_PATTERNS); IPR007087 (PROSITE_PATTERNS); IPR007087 (PROSITE_PATTERNS); IPR007087 (PROSITE_PATTERNS); IPR007087 (PROSITE_PROFILES); IPR007087 (PROSITE_PROFILES); IPR007087 (PROSITE_PROFILES); IPR007087 (PROSITE_PROFILES); IPR007087 (PROSITE_PROFILES); IPR007087 (PROSITE_PROFILES); SSF57667 (SUPERFAMILY); SSF57667 (SUPERFAMILY); SSF57667 (SUPERFAMILY) |
| 1514 | c32070_g1_i1_len_1979_path_1_0_1978_1                                                            | 98  | katanin p60 atpase-containing subunit a-like 1             | 660 | 0         | 82.00% | 0.317 | IPR003593 (SMART); IPR015415 (PFAM); IPR027417 (G3DSA:3.40.50.GENE3D); G3DSA:1.10.8.60 (GENE3D); IPR003959 (PFAM); PTHR23074 (PANTHER); PTHR23074:SF65 (PANTHER); IPR003960 (PROSITE_PATTERNS); NON_CYTOPLASMIC_DOMAIN (PHOBIUS); NON_CYTOPLASMIC_DOMAIN (PHOBIUS); TRANSMEMBRANE (PHOBIUS); CYTOPLASMIC_DOMAIN (PHOBIUS); TRANSMEMBRANE (PHOBIUS); SIGNAL_PEPTIDE_N_REGION (PHOBIUS); SIGNAL_PEPTIDE_C_REGION (PHOBIUS); SIGNAL_PEPTIDE (PHOBIUS); SIGNAL_PEPTIDE_H_REGION (PHOBIUS); IPR028596 (HAMAP); IPR027417 (SUPERFAMILY); TMhelix (TMHMM)                                                                                                                               |
| 1515 | c32133_g1_i1_len_1678_path_1_0_1677_4                                                            | 63  | ikaros family zinc finger protein                          | 559 | 4.69E-93  | 51.80% | 0.101 | IPR015880 (SMART); IPR013087 (G3DSA:3.30.160.GENE3D); IPR013087 (G3DSA:3.30.160.GENE3D); PF13465 (PFAM); PF13894 (PFAM); IPR013087 (G3DSA:3.30.160.GENE3D); PTHR24409 (PANTHER); IPR007087 (PROSITE_PATTERNS); IPR007087 (PROSITE_PATTERNS); IPR007087 (PROSITE_PATTERNS); IPR007087 (PROSITE_PROFILES); IPR007087 (PROSITE_PROFILES); IPR007087 (PROSITE_PROFILES); IPR007087 (PROSITE_PROFILES); SSF57667 (SUPERFAMILY); SSF57667 (SUPERFAMILY)                                                                                                                                                                                                                                |
| 1516 | c32186_g1_i1_len_1627_path_1_0_1626_0                                                            | 115 | flavin-containing monooxygenase fmo gs-ox4-like isoform x1 | 537 | 6.38E-134 | 62.90% | 0.308 | IPR000960 (PRINTS); G3DSA:3.50.50.60 (GENE3D); IPR020946 (PFAM); G3DSA:3.50.50.60 (GENE3D); PTHR23023:SF4 (PANTHER); PTHR23023 (PANTHER); SSF51905 (SUPERFAMILY); SSF51905 (SUPERFAMILY); TMhelix (TMHMM)                                                                                                                                                                                                                                                                                                                                                                                                                                                                        |
| 1517 | c32210_g1_i1_len_513_path_491_0_512_3                                                            | 8   | lipase 3-like                                              | 171 | 1.97E-47  | 70.90% | 0.157 | IPR029058 (G3DSA:3.40.50.GENE3D); PTHR11005:SF6 (PANTHER); PTHR11005 (PANTHER); IPR029058 (SUPERFAMILY)                                                                                                                                                                                                                                                                                                                                                                                                                                                                                                                                                                          |
| 1518 | c32221_g1_i1_len_1311_path_1289_0_1310_0                                                         | 23  | retinol dehydrogenase 13                                   | 437 | 1.50E-111 | 71.10% | 0.134 | IPR002198 (PRINTS); IPR002347 (PRINTS); IPR016040 (G3DSA:3.40.50.GENE3D); IPR002198 (PFAM); PTHR24320:SF38 (PANTHER); PTHR24320 (PANTHER); IPR020904 (PROSITE_PATTERNS); CYTOPLASMIC_DOMAIN (PHOBIUS); NON_CYTOPLASMIC_DOMAIN (PHOBIUS); TRANSMEMBRANE (PHOBIUS); SSF51735 (SUPERFAMILY)                                                                                                                                                                                                                                                                                                                                                                                         |
| 1519 | c32435_g1_i1_len_385_path_363_0_384_2                                                            | 1   | retinol dehydrogenase 13-like                              | 128 | 3.53E-35  | 74.30% | 0.243 | IPR016040 (G3DSA:3.40.50.GENE3D); IPR002198 (PFAM); PTHR24320 (PANTHER); PTHR24320:SF38 (PANTHER); CYTOPLASMIC_DOMAIN (PHOBIUS); NON_CYTOPLASMIC_DOMAIN (PHOBIUS); TRANSMEMBRANE (PHOBIUS); SSF51735 (SUPERFAMILY); TMhelix (TMHMM)                                                                                                                                                                                                                                                                                                                                                                                                                                              |
| 1520 | c32656_g1_i1_len_1935_path_1_0_1934_1                                                            | 61  | antigen partial                                            | 645 | 0         | 99.00% | 0.235 | IPR024973 (PFAM); IPR012332 (G3DSA:2.160.20.GENE3D); PTHR12338 (PANTHER)                                                                                                                                                                                                                                                                                                                                                                                                                                                                                                                                                                                                         |
| 1521 | c32756_g1_i1_len_518_path_496_0_517_2                                                            | 4   | retinol dehydrogenase 11-like                              | 172 | 5.41E-59  | 72.00% | 0.315 | IPR002347 (PRINTS); IPR002198 (PFAM); IPR016040 (G3DSA:3.40.50.GENE3D); PTHR24316:SF305 (PANTHER); PTHR24316 (PANTHER); CYTOPLASMIC_DOMAIN (PHOBIUS); NON_CYTOPLASMIC_DOMAIN (PHOBIUS); TRANSMEMBRANE (PHOBIUS); SSF51735 (SUPERFAMILY); TMhelix (TMHMM)                                                                                                                                                                                                                                                                                                                                                                                                                         |
| 1522 | c33010_g1_i1_len_313_path_1_0_312_5                                                              | 2   | hemagglutinin                                              | 104 | 6.33E-16  | 57.60% | 0.128 | IPR001570 (PFAM); G3DSA:1.10.390.10 (GENE3D); SSF55486 (SUPERFAMILY)                                                                                                                                                                                                                                                                                                                                                                                                                                                                                                                                                                                                             |

|      |                                          |    |                                                       |     |           |         |       |                                                                                                                                                                                                                                                                                                                                                                                                                                                                                                                                                                                                      |
|------|------------------------------------------|----|-------------------------------------------------------|-----|-----------|---------|-------|------------------------------------------------------------------------------------------------------------------------------------------------------------------------------------------------------------------------------------------------------------------------------------------------------------------------------------------------------------------------------------------------------------------------------------------------------------------------------------------------------------------------------------------------------------------------------------------------------|
| 1523 | c33123_g1_i1_len_1645_path_1_0_1644_1    | 42 | serine threonine-protein kinase nek7                  | 542 | 4.29E-178 | 91.10%  | 0.145 | IPR002290 (SMART); G3DSA:3.30.200.20 (GENE3D); G3DSA:1.10.510.10 (GENE3D); IPR000719 (PFAM); PTHR24362:SF228 (PANTHER); PTHR24362 (PANTHER); IPR017441 (PROSITE_PATTERNS); IPR008271 (PROSITE_PATTERNS); CYTOPLASMIC_DOMAIN (PHOBIUS); TRANSMEMBRANE (PHOBIUS); TRANSMEMBRANE (PHOBIUS); NON_CYTOPLASMIC_DOMAIN (PHOBIUS); NON_CYTOPLASMIC_DOMAIN (PHOBIUS); IPR000719 (PROSITE_PROFILES); IPR011009 (SUPERFAMILY); TMhelix (TMHMM); TMhelix (TMHMM)                                                                                                                                                 |
| 1524 | c33144_g1_i1_len_1074_path_1_0_1073_1    | 9  | pentapeptide repeats family protein                   | 358 | 0         | 100.00% | 0.117 | IPR025726 (PFAM)                                                                                                                                                                                                                                                                                                                                                                                                                                                                                                                                                                                     |
| 1525 | c33176_g1_i1_len_678_path_726_0_677_2    | 6  | gelsolin                                              | 226 | 3.18E-35  | 75.30%  | 0.244 | IPR029006 (G3DSA:3.40.20.GENE3D); IPR007122 (PANTHER); IPR030004 (PTHR11977:PANTHER); SSF55753 (SUPERFAMILY)                                                                                                                                                                                                                                                                                                                                                                                                                                                                                         |
| 1526 | c33193_g1_i1_len_1369_path_1_0_1368_2    | 45 | insulin-degrading enzyme isoform x2                   | 456 | 3.77E-97  | 70.60%  | 0.107 | IPR007863 (PFAM); IPR011237 (G3DSA:3.30.830.GENE3D); PTHR11851 (PANTHER); PTHR11851:SF109 (PANTHER); IPR011249 (SUPERFAMILY)                                                                                                                                                                                                                                                                                                                                                                                                                                                                         |
| 1527 | c33273_g1_i1_len_380_path_358_0_379_1    | 1  | hsp70 family protein                                  | 127 | 1.47E-83  | 100.00% | 0.11  | IPR029047 (G3DSA:2.60.34.GENE3D); IPR013126 (PFAM); IPR029048 (G3DSA:1.20.1270.GENE3D); PTHR19375 (PANTHER); PTHR19375:SF173 (PANTHER); IPR029047 (SUPERFAMILY)                                                                                                                                                                                                                                                                                                                                                                                                                                      |
| 1528 | c33490_g1_i1_len_536_path_514_0_535_4    | 8  | dna-specific endonuclease i                           | 179 | 1.17E-66  | 100.00% | 0.107 | IPR007346 (PFAM); SSF54060 (SUPERFAMILY)                                                                                                                                                                                                                                                                                                                                                                                                                                                                                                                                                             |
| 1529 | c33527_g1_i1_len_1192_path_1_0_1191_0    | 8  | carbohydrate binding domain-containing protein        | 398 | 3.07E-70  | 99.30%  | 0.125 | IPR007419 (PFAM); CYTOPLASMIC_DOMAIN (PHOBIUS); NON_CYTOPLASMIC_DOMAIN (PHOBIUS); NON_CYTOPLASMIC_DOMAIN (PHOBIUS); TRANSMEMBRANE (PHOBIUS); CYTOPLASMIC_DOMAIN (PHOBIUS); TRANSMEMBRANE (PHOBIUS); TRANSMEMBRANE (PHOBIUS)                                                                                                                                                                                                                                                                                                                                                                          |
| 1530 | c33609_g1_i1_len_1423_path_1_0_1422_0    | 27 | aspartate--trna mitochondrial                         | 475 | 0         | 72.10%  | 0.107 | IPR002312 (PRINTS); IPR004364 (PFAM); IPR004524 (TIGRFAM); IPR004115 (G3DSA:3.30.1360.GENE3D); G3DSA:3.30.930.10 (GENE3D); IPR029351 (PFAM); IPR004524 (PTHR22594:PANTHER); IPR018150 (PANTHER); IPR006195 (PROSITE_PROFILES); IPR004115 (SUPERFAMILY); SSF55681 (SUPERFAMILY)                                                                                                                                                                                                                                                                                                                       |
| 1531 | c33635_g1_i1_len_981_path_959_0_980_5    | 12 | glucose dehydrogenase                                 | 327 | 1.26E-71  | 63.00%  | 0.102 | G3DSA:3.30.560.10 (GENE3D); IPR000172 (PFAM); G3DSA:3.50.50.60 (GENE3D); IPR007867 (PFAM); PTHR11552 (PANTHER); PTHR11552:SF77 (PANTHER); IPR000172 (PROSITE_PATTERNS); SSF51905 (SUPERFAMILY); SSF54373 (SUPERFAMILY)                                                                                                                                                                                                                                                                                                                                                                               |
| 1532 | c33786_g1_i1_len_612_path_1076_0_611_1   | 3  | 50MGP                                                 | 204 | 1.06E-14  | 50.20%  | 0.235 | PTHR11008 (PANTHER); PTHR11008:SF13 (PANTHER); NON_CYTOPLASMIC_DOMAIN (PHOBIUS); CYTOPLASMIC_DOMAIN (PHOBIUS); TRANSMEMBRANE (PHOBIUS); IPR020234 (PRODOM)                                                                                                                                                                                                                                                                                                                                                                                                                                           |
| 1533 | c33913_g1_i1_len_926_path_1_0_925_0      | 12 | collagen alpha-1 chain                                | 309 | 3.22E-20  | 58.60%  | 0.101 | IPR008160 (PFAM); PTHR24023:SF372 (PANTHER); PTHR24023 (PANTHER)                                                                                                                                                                                                                                                                                                                                                                                                                                                                                                                                     |
| 1534 | c33913_g1_i1_len_926_path_1_0_925_2      | 12 | cre-let-2 protein                                     | 308 | 1.32E-17  | 62.10%  | 0.114 | IPR008160 (PFAM)                                                                                                                                                                                                                                                                                                                                                                                                                                                                                                                                                                                     |
| 1535 | c33913_g1_i1_len_926_path_1_0_925_3      | 12 | serine-aspartate repeat protein f                     | 309 | 2.17E-18  | 42.60%  | 0.246 | no IPS match                                                                                                                                                                                                                                                                                                                                                                                                                                                                                                                                                                                         |
| 1536 | c33949_g1_i1_len_619_path_1_0_618_4      | 4  | phosphoglycerol transferase partial                   | 206 | 7.49E-150 | 99.40%  | 0.127 | IPR000917 (PFAM); IPR017849 (G3DSA:3.40.720.GENE3D); PTHR10342 (PANTHER); PTHR10342:SF182 (PANTHER); IPR017850 (SUPERFAMILY)                                                                                                                                                                                                                                                                                                                                                                                                                                                                         |
| 1537 | c34084_g1_i1_len_534_path_1_0_533_2      | 4  | thioredoxin domain-containing protein 5               | 178 | 3.99E-45  | 71.10%  | 0.281 | PR00421 (PRINTS); IPR012336 (G3DSA:3.40.30.GENE3D); IPR013766 (PFAM); IPR005788 (TIGRFAM); PTHR18929 (PANTHER); PTHR18929:SF52 (PANTHER); IPR017937 (PROSITE_PATTERNS); IPR012336 (PROSITE_PROFILES); IPR012336 (SUPERFAMILY)                                                                                                                                                                                                                                                                                                                                                                        |
| 1538 | c34109_g1_i1_len_241_path_1_0_240_3      | 0  | neutral ceramidase-like                               | 81  | 5.19E-28  | 77.70%  | 0.11  | IPR006823 (PFAM); PTHR12670:SF1 (PANTHER); IPR006823 (PANTHER)                                                                                                                                                                                                                                                                                                                                                                                                                                                                                                                                       |
| 1539 | c34160_g1_i1_len_163_path_1_0_162_5      | 0  | acyl- -binding domain-containing protein 4 isoform x1 | 54  | 2.70E-06  | 72.50%  | 0.116 | no IPS match                                                                                                                                                                                                                                                                                                                                                                                                                                                                                                                                                                                         |
| 1540 | c34174_g1_i1_len_514_path_1_0_513_5      | 6  | glucosidase 2 subunit beta                            | 171 | 2.67E-63  | 70.70%  | 0.107 | Coil (COILS); PF13015 (PFAM); IPR009011 (G3DSA:2.70.130.GENE3D); IPR026874 (PTHR12630:PANTHER); PTHR12630 (PANTHER); IPR009011 (SUPERFAMILY)                                                                                                                                                                                                                                                                                                                                                                                                                                                         |
| 1541 | c34275_g1_i1_len_1017_path_995_0_1016_1  | 14 | sulfatase family protein                              | 339 | 0         | 99.00%  | 0.102 | G3DSA:3.30.1120.10 (GENE3D); IPR000917 (PFAM); IPR017849 (G3DSA:3.40.720.GENE3D); PTHR10342:SF160 (PANTHER); PTHR10342 (PANTHER); IPR024607 (PROSITE_PATTERNS); IPR017850 (SUPERFAMILY)                                                                                                                                                                                                                                                                                                                                                                                                              |
| 1542 | c34326_g1_i1_len_2145_path_2123_0_2144_1 | 81 | cyclin-dependent kinase 14 isoform x1                 | 715 | 0         | 89.50%  | 0.109 | IPR002290 (SMART); IPR000719 (PFAM); G3DSA:3.30.200.20 (GENE3D); G3DSA:1.10.510.10 (GENE3D); PTHR24056:SF155 (PANTHER); PTHR24056 (PANTHER); IPR008271 (PROSITE_PATTERNS); IPR017441 (PROSITE_PATTERNS); CYTOPLASMIC_DOMAIN (PHOBIUS); TRANSMEMBRANE (PHOBIUS); NON_CYTOPLASMIC_DOMAIN (PHOBIUS); NON_CYTOPLASMIC_DOMAIN (PHOBIUS); TRANSMEMBRANE (PHOBIUS); TRANSMEMBRANE (PHOBIUS); CYTOPLASMIC_DOMAIN (PHOBIUS); TRANSMEMBRANE (PHOBIUS); CYTOPLASMIC_DOMAIN (PHOBIUS); IPR000719 (PROSITE_PROFILES); IPR011009 (SUPERFAMILY); TMhelix (TMHMM); TMhelix (TMHMM); TMhelix (TMHMM); TMhelix (TMHMM) |
| 1543 | c34357_g1_i1_len_250_path_1_0_249_1      | 2  | von willebrand factor a domain-containing protein 8   | 83  | 6.14E-13  | 99.20%  | 0.167 | PTHR21610 (PANTHER); PTHR21610:SF9 (PANTHER); TRANSMEMBRANE (PHOBIUS); CYTOPLASMIC_DOMAIN (PHOBIUS); NON_CYTOPLASMIC_DOMAIN (PHOBIUS); TMhelix (TMHMM)                                                                                                                                                                                                                                                                                                                                                                                                                                               |





|      |                                                             |      |                                                        |     |           |        |       |                                                                                                                                                                                                                                                                                                                                                                                                                                                                                                  |
|------|-------------------------------------------------------------|------|--------------------------------------------------------|-----|-----------|--------|-------|--------------------------------------------------------------------------------------------------------------------------------------------------------------------------------------------------------------------------------------------------------------------------------------------------------------------------------------------------------------------------------------------------------------------------------------------------------------------------------------------------|
| 1552 | c35225_g1_i1_len_1025_path_1_0_1024_2                       | 15   | cytochrome p450 cyp44                                  | 336 | 1.23E-95  | 67.50% | 0.1   | IPR002401 (PRINTS); IPR001128 (PRINTS); IPR001128 (G3DSA:1.10.630.GENE3D); IPR001128 (PFAM); PTHR24291 (PANTHER); PTHR24291:SF1 (PANTHER); IPR017972 (PROSITE_PATTERNS); IPR001128 (SUPERFAMILY)                                                                                                                                                                                                                                                                                                 |
| 1553 | c35275_g1_i1_len_606_path_1_0_605_1                         | 6    | glycerophosphoryl diester phosphodiesterase            | 202 | 1.01E-134 | 99.70% | 0.221 | IPR030395 (PFAM); IPR017946 (G3DSA:3.20.20.GENE3D); PTHR23344:SF7 (PANTHER); IPR004129 (PANTHER); IPR030395 (PROSITE_PROFILES); SignalP-TM (SIGNALP_GRAM_POSITIVE); IPR017946 (SUPERFAMILY)                                                                                                                                                                                                                                                                                                      |
| 1554 | c35304_g1_i1_len_1060_path_1_0_1059_1                       | 15   | protein gdp2 homolog                                   | 353 | 3.62E-115 | 74.30% | 0.209 | IPR002589 (SMART); IPR002589 (PFAM); G3DSA:3.40.220.10 (GENE3D); PTHR11106:SF59 (PANTHER); PTHR11106 (PANTHER); IPR002589 (PROSITE_PROFILES); SSF52949 (SUPERFAMILY)                                                                                                                                                                                                                                                                                                                             |
| 1555 | c35381_g1_i1_len_624_path_602_0_623_1                       | 7    | 6-phospho-beta- partial                                | 208 | 2.30E-120 | 98.00% | 0.117 | IPR013781 (G3DSA:3.20.20.GENE3D); IPR001360 (PFAM); IPR001360 (PANTHER); PTHR10353:SF35 (PANTHER); IPR018120 (PROSITE_PATTERNS); IPR017853 (SUPERFAMILY)                                                                                                                                                                                                                                                                                                                                         |
| 1556 | c35533_g1_i1_len_1016_path_1002_0_1015_3                    | 595  | mitochondrial manganese superoxide dismutase           | 333 | 3.23E-121 | 86.10% | 0.11  | Coil (COILS); IPR001189 (PRINTS); G3DSA:1.10.287.990 (GENE3D); IPR019832 (PFAM); IPR019831 (PFAM); IPR001189 (PANTHER); PTHR11404:SF6 (PANTHER); IPR019833 (PROSITE_PATTERNS); NON_CYTOPLASMIC_DOMAIN (PHOBIUS); TRANSMEMBRANE (PHOBIUS); CYTOPLASMIC_DOMAIN (PHOBIUS); IPR019831 (SUPERFAMILY); IPR019832 (SUPERFAMILY); TMhelix (TMHMM)                                                                                                                                                        |
| 1557 | c35602_g1_i1_len_274_path_252_0_273_4                       | 0    | serine threonine-protein kinase mark2-like isoform x10 | 91  | 2.42E-56  | 99.80% | 0.101 | IPR002290 (SMART); IPR000719 (PFAM); G3DSA:3.30.200.20 (GENE3D); G3DSA:1.10.510.10 (GENE3D); PTHR24346 (PANTHER); IPR008271 (PROSITE_PATTERNS); IPR000719 (PROSITE_PROFILES); IPR011009 (SUPERFAMILY)                                                                                                                                                                                                                                                                                            |
| 1558 | c36079_g1_i1_len_609_path_1_0_608_1                         | 5    | aldehyde partial                                       | 203 | 5.48E-143 | 99.10% | 0.119 | IPR015590 (PFAM); IPR016162 (G3DSA:3.40.605.GENE3D); PTHR11699 (PANTHER); PTHR11699:SF97 (PANTHER); IPR029510 (PROSITE_PATTERNS); IPR016161 (SUPERFAMILY)                                                                                                                                                                                                                                                                                                                                        |
| 1559 | c36098_g1_i1_len_840_path_1_0_839_1                         | 27   | ankyrin repeat domain-containing protein 49-like       | 280 | 3.20E-61  | 68.40% | 0.145 | IPR002110 (PRINTS); IPR002110 (SMART); IPR020683 (PFAM); IPR020683 (G3DSA:1.25.40.GENE3D); PTHR24144 (PANTHER); IPR002110 (PROSITE_PROFILES); IPR002110 (PROSITE_PROFILES); IPR002110 (PROSITE_PROFILES); IPR020683 (PROSITE_PROFILES); IPR020683 (SUPERFAMILY)                                                                                                                                                                                                                                  |
| 1560 | c36177_g1_i1_len_1295_path_1_0_1294_4                       | 25   | dehydrogenase reductase sdr family member 11-like      | 432 | 1.58E-103 | 74.50% | 0.13  | IPR002198 (PRINTS); IPR002347 (PRINTS); IPR016040 (G3DSA:3.40.50.GENE3D); IPR002198 (PFAM); PTHR24322:SF310 (PANTHER); PTHR24322 (PANTHER); CYTOPLASMIC_DOMAIN (PHOBIUS); TRANSMEMBRANE (PHOBIUS); CYTOPLASMIC_DOMAIN (PHOBIUS); NON_CYTOPLASMIC_DOMAIN (PHOBIUS); TRANSMEMBRANE (PHOBIUS); SSF51735 (SUPERFAMILY); TMhelix (TMHMM); TMhelix (TMHMM)                                                                                                                                             |
| 1561 | c36555_g1_i1_len_554_path_532_0_553_4                       | 5    | 6-phospho-beta-glucosidase                             | 185 | 2.18E-125 | 99.50% | 0.123 | IPR013781 (G3DSA:3.20.20.GENE3D); IPR001360 (PFAM); PTHR10353:SF31 (PANTHER); IPR001360 (PANTHER); IPR018120 (PROSITE_PATTERNS); IPR017853 (SUPERFAMILY)                                                                                                                                                                                                                                                                                                                                         |
| 1562 | c36683_g1_i1_len_1269_path_1_0_1268_5                       | 35   | leukocyte elastase inhibitor a-like                    | 423 | 2.47E-49  | 56.60% | 0.149 | IPR023796 (SMART); G3DSA:3.30.497.10 (GENE3D); IPR023796 (PFAM); IPR000215 (PANTHER); NON_CYTOPLASMIC_DOMAIN (PHOBIUS); CYTOPLASMIC_DOMAIN (PHOBIUS); CYTOPLASMIC_DOMAIN (PHOBIUS); CYTOPLASMIC_DOMAIN (PHOBIUS); TRANSMEMBRANE (PHOBIUS); TRANSMEMBRANE (PHOBIUS); TRANSMEMBRANE (PHOBIUS); NON_CYTOPLASMIC_DOMAIN (PHOBIUS); IPR023796 (SUPERFAMILY); TMhelix (TMHMM); TMhelix (TMHMM); TMhelix (TMHMM)                                                                                        |
| 1563 | c37095_g1_i1_len_1052_path_14_0_1051_0                      | 44   | apolipoprotein a-i-binding protein                     | 345 | 9.82E-109 | 77.50% | 0.103 | IPR004443 (PFAM); IPR004443 (TIGRFAM); IPR004443 (G3DSA:3.40.50.GENE3D); PTHR13232 (PANTHER); IPR004443 (HAMAP); IPR004443 (PROSITE_PROFILES); IPR004443 (SUPERFAMILY)                                                                                                                                                                                                                                                                                                                           |
| 1564 | c372_g1_i1_len_1243_path_33_0_1162_1195_1163_32_1164_1242_2 | 2513 | steroid dehydrogenase                                  | 407 | 1.35E-115 | 68.80% | 0.199 | Coil (COILS); IPR002198 (PRINTS); IPR002347 (PRINTS); IPR002198 (PFAM); IPR016040 (G3DSA:3.40.50.GENE3D); PTHR24316:SF68 (PANTHER); PTHR24316 (PANTHER); NON_CYTOPLASMIC_DOMAIN (PHOBIUS); NON_CYTOPLASMIC_DOMAIN (PHOBIUS); TRANSMEMBRANE (PHOBIUS); NON_CYTOPLASMIC_DOMAIN (PHOBIUS); TRANSMEMBRANE (PHOBIUS); TRANSMEMBRANE (PHOBIUS); CYTOPLASMIC_DOMAIN (PHOBIUS); CYTOPLASMIC_DOMAIN (PHOBIUS); SSF51735 (SUPERFAMILY); TMhelix (TMHMM); TMhelix (TMHMM); TMhelix (TMHMM); TMhelix (TMHMM) |
| 1565 | c3723_g1_i1_len_1098_path_53_0_1097_5                       | 70   | protein spaetzle                                       | 356 | 8.86E-28  | 51.90% | 0.141 | PTHR23199 (PANTHER); TRANSMEMBRANE (PHOBIUS); NON_CYTOPLASMIC_DOMAIN (PHOBIUS); CYTOPLASMIC_DOMAIN (PHOBIUS); IPR029034 (SUPERFAMILY); TMhelix (TMHMM)                                                                                                                                                                                                                                                                                                                                           |

|      |                                                                        |    |                                                                  |     |           |        |         |                                                                                                                                                                                                                                                                                                                                                                                                                                                                                                                                                            |
|------|------------------------------------------------------------------------|----|------------------------------------------------------------------|-----|-----------|--------|---------|------------------------------------------------------------------------------------------------------------------------------------------------------------------------------------------------------------------------------------------------------------------------------------------------------------------------------------------------------------------------------------------------------------------------------------------------------------------------------------------------------------------------------------------------------------|
| 1566 | c37329_g1_i1_len_541_path_519_0_540_0                                  | 7  | 14-3-3 zeta                                                      | 181 | 1.72E-51  | 92.10% | 0.128   | Coil (COILS); IPR000308 (PRINTS); IPR023410 (SMART); G3DSA:1.20.190.20 (GENE3D); IPR023410 (PFAM); IPR000308 (PANTHER); TRANSMEMBRANE (PHOBIUS); CYTOPLASMIC_DOMAIN (PHOBIUS); NON_CYTOPLASMIC_DOMAIN (PHOBIUS); IPR023410 (SUPERFAMILY); TMhelix (TMHMM); TMhelix (TMHMM)                                                                                                                                                                                                                                                                                 |
| 1567 | c37416_g1_i1_len_505_path_1_0_504_1                                    | 4  | polypeptide n-acetylgalactosaminyltransferase 1                  | 168 | 1.21E-45  | 72.90% | 0.103   | IPR029044 (G3DSA:3.90.550.GENE3D); IPR001173 (PFAM); PTHR11675 (PANTHER); PTHR11675:SF27 (PANTHER); IPR029044 (SUPERFAMILY)                                                                                                                                                                                                                                                                                                                                                                                                                                |
| 1568 | c37579_g1_i1_len_838_path_816_0_837_0                                  | 12 | thrombospondin type-1 domain-containing protein 4-like           | 280 | 4.55E-23  | 57.10% | 0.638 Y | IPR000884 (SMART); G3DSA:2.20.100.10 (GENE3D); IPR000884 (PFAM); PTHR13723 (PANTHER); NON_CYTOPLASMIC_DOMAIN (PHOBIUS); TRANSMEMBRANE (PHOBIUS); CYTOPLASMIC_DOMAIN (PHOBIUS); TRANSMEMBRANE (PHOBIUS); NON_CYTOPLASMIC_DOMAIN (PHOBIUS); IPR000884 (PROSITE_PROFILES); SignalP-noTM (SIGNALP_EUK); IPR000884 (SUPERFAMILY); TMhelix (TMHMM); TMhelix (TMHMM)                                                                                                                                                                                              |
| 1569 | c37589_g1_i1_len_1210_path_1188_0_1209_1                               | 25 | e3 ubiquitin-protein ligase partial                              | 403 | 2.34E-143 | 66.30% | 0.11    | Coil (COILS); IPR001841 (SMART); IPR002110 (SMART); IPR013083 (G3DSA:3.30.40.GENE3D); IPR020683 (G3DSA:1.25.40.GENE3D); IPR013083 (G3DSA:3.30.40.GENE3D); PF13920 (PFAM); IPR020683 (PFAM); IPR002110 (PFAM); PTHR24202 (PANTHER); PTHR24202:SF4 (PANTHER); CYTOPLASMIC_DOMAIN (PHOBIUS); TRANSMEMBRANE (PHOBIUS); NON_CYTOPLASMIC_DOMAIN (PHOBIUS); IPR020683 (PROSITE_PROFILES); IPR001841 (PROSITE_PROFILES); IPR002110 (PROSITE_PROFILES); IPR001841 (PROSITE_PROFILES); IPR002110 (PROSITE_PROFILES); IPR020683 (SUPERFAMILY); SSF57850 (SUPERFAMILY) |
| 1570 | c37684_g1_i1_len_259_path_237_0_258_4                                  | 0  | group 3 secretory phospholipase a2-like                          | 86  | 1.19E-23  | 69.40% | 0.155   | IPR016090 (G3DSA:1.20.90.GENE3D); IPR001211 (PFAM); PTHR12253 (PANTHER); IPR016090 (SUPERFAMILY)                                                                                                                                                                                                                                                                                                                                                                                                                                                           |
| 1571 | c37781_g1_i1_len_1166_path_1144_0_1165_4                               | 19 | down syndrome cell adhesion molecule isoform bc                  | 389 | 1.49E-85  | 65.60% | 0.207   | IPR003599 (SMART); IPR003598 (SMART); IPR013783 (G3DSA:2.60.40.GENE3D); IPR013783 (G3DSA:2.60.40.GENE3D); IPR013098 (PFAM); IPR013783 (G3DSA:2.60.40.GENE3D); PF13895 (PFAM); PTHR10489 (PANTHER); PTHR10489:SF567 (PANTHER); CYTOPLASMIC_DOMAIN (PHOBIUS); TRANSMEMBRANE (PHOBIUS); NON_CYTOPLASMIC_DOMAIN (PHOBIUS); IPR007110 (PROSITE_PROFILES); IPR007110 (PROSITE_PROFILES); SSF48726 (SUPERFAMILY); SSF48726 (SUPERFAMILY)                                                                                                                          |
| 1572 | c37875_g1_i1_len_1149_path_1127_0_1148_5                               | 17 | neural ectodermal development factor imp-l2                      | 383 | 9.88E-44  | 51.70% | 0.218   | IPR003599 (SMART); IPR003598 (SMART); PF13895 (PFAM); IPR013098 (PFAM); IPR013783 (G3DSA:2.60.40.GENE3D); IPR013783 (G3DSA:2.60.40.GENE3D); PTHR10489 (PANTHER); SIGNAL_PEPTIDE_N_REGION (PHOBIUS); SIGNAL_PEPTIDE_H_REGION (PHOBIUS); SIGNAL_PEPTIDE (PHOBIUS); NON_CYTOPLASMIC_DOMAIN (PHOBIUS); SIGNAL_PEPTIDE_C_REGION (PHOBIUS); IPR007110 (PROSITE_PROFILES); IPR007110 (PROSITE_PROFILES); SSF48726 (SUPERFAMILY); SSF48726 (SUPERFAMILY); TMhelix (TMHMM)                                                                                          |
| 1573 | c37931_g1_i1_len_425_path_1_0_424_1                                    | 4  | serine endoprotease partial                                      | 142 | 8.91E-92  | 99.00% | 0.116   | IPR001940 (PRINTS); G3DSA:2.40.10.10 (GENE3D); G3DSA:2.40.10.10 (GENE3D); PF13365 (PFAM); PTHR22939 (PANTHER); IPR009003 (SUPERFAMILY)                                                                                                                                                                                                                                                                                                                                                                                                                     |
| 1574 | c37943_g1_i1_len_1061_path_1_0_1060_3                                  | 47 | a disintegrin and metalloproteinase with thrombospondin motifs 2 | 349 | 3.69E-15  | 49.50% | 0.151   | IPR002870 (PFAM); PTHR13723 (PANTHER)                                                                                                                                                                                                                                                                                                                                                                                                                                                                                                                      |
| 1575 | c37950_g1_i1_len_992_path_1_0_991_5                                    | 38 | prolow-density lipoprotein receptor-related protein 1-like       | 330 | 3.47E-31  | 54.80% | 0.115   | IPR002172 (PRINTS); IPR002172 (SMART); IPR002172 (G3DSA:4.10.400.GENE3D); IPR002172 (G3DSA:4.10.400.GENE3D); IPR002172 (PFAM); IPR002172 (G3DSA:4.10.400.GENE3D); PTHR10529 (PANTHER); IPR023415 (PROSITE_PATTERNS); TRANSMEMBRANE (PHOBIUS); TRANSMEMBRANE (PHOBIUS); CYTOPLASMIC_DOMAIN (PHOBIUS); CYTOPLASMIC_DOMAIN (PHOBIUS); NON_CYTOPLASMIC_DOMAIN (PHOBIUS); IPR002172 (PROSITE_PROFILES); IPR002172 (PROSITE_PROFILES); IPR002172 (PROSITE_PROFILES); IPR002172 (SUPERFAMILY); IPR002172 (SUPERFAMILY); TMhelix (TMHMM); TMhelix (TMHMM)          |
| 1576 | c3812_g1_i1_len_306_path_438_0_29_103_30_1_25_19_126_209_103_210_305_0 | 0  | aggrecan core protein                                            | 102 | 4.92E-08  | 51.50% | 0.235   | no IPS match                                                                                                                                                                                                                                                                                                                                                                                                                                                                                                                                               |
| 1577 | c38320_g1_i1_len_722_path_700_0_721_0                                  | 9  | protein disulfide-isomerase-like                                 | 241 | 4.27E-20  | 73.60% | 0.144   | IPR013766 (PFAM); IPR012336 (G3DSA:3.40.30.GENE3D); PTHR18929:SF56 (PANTHER); PTHR18929 (PANTHER); IPR012336 (PROSITE_PROFILES); IPR012336 (SUPERFAMILY)                                                                                                                                                                                                                                                                                                                                                                                                   |

|      |                                                      |     |                                                           |     |           |        |         |                                                                                                                                                                                                                                                                                                                                                                                                                                                                                                                                                                                                                                                                                                                       |
|------|------------------------------------------------------|-----|-----------------------------------------------------------|-----|-----------|--------|---------|-----------------------------------------------------------------------------------------------------------------------------------------------------------------------------------------------------------------------------------------------------------------------------------------------------------------------------------------------------------------------------------------------------------------------------------------------------------------------------------------------------------------------------------------------------------------------------------------------------------------------------------------------------------------------------------------------------------------------|
| 1578 | c3837_g1_i1_len_2345_path_635_0_987_634_98_8_2344_4  | 58  | neuroglian-like isoform x2                                | 782 | 0         | 75.50% | 0.108   | IPR003599 (SMART); IPR003598 (SMART); IPR003961 (SMART); IPR003961 (PFAM); IPR013783 (G3DSA:2.60.40.GENE3D); IPR013098 (PFAM); IPR013783 (G3DSA:2.60.40.GENE3D); IPR013783 (G3DSA:2.60.40.GENE3D); IPR013783 (G3DSA:2.60.40.GENE3D); IPR013783 (G3DSA:2.60.40.GENE3D); PTHR10489 (PANTHER); PTHR10489:SF553 (PANTHER); TRANSMEMBRANE (PHOBIUS); CYTOPLASMIC_DOMAIN (PHOBIUS); NON_CYTOPLASMIC_DOMAIN (PHOBIUS); IPR003961 (PROSITE_PROFILES); IPR007110 (PROSITE_PROFILES); IPR003961 (PROSITE_PROFILES); IPR007110 (PROSITE_PROFILES); IPR003961 (PROSITE_PROFILES); IPR003961 (PROSITE_PROFILES); SSF48726 (SUPERFAMILY); IPR003961 (SUPERFAMILY); IPR003961 (SUPERFAMILY); SSF48726 (SUPERFAMILY); TMhelix (TMHMM) |
| 1579 | c3837_g1_i2_len_1673_path_318_0_315_634_31_6_1672_4  | 27  | neuroglian-like isoform 2                                 | 558 | 0         | 79.20% | 0.108   | IPR003961 (SMART); IPR003599 (SMART); IPR003598 (SMART); IPR013783 (G3DSA:2.60.40.GENE3D); IPR013783 (G3DSA:2.60.40.GENE3D); IPR013783 (G3DSA:2.60.40.GENE3D); IPR013098 (PFAM); IPR013783 (G3DSA:2.60.40.GENE3D); IPR003961 (PFAM); PTHR10489 (PANTHER); PTHR10489:SF553 (PANTHER); NON_CYTOPLASMIC_DOMAIN (PHOBIUS); TRANSMEMBRANE (PHOBIUS); CYTOPLASMIC_DOMAIN (PHOBIUS); IPR003961 (PROSITE_PROFILES); IPR007110 (PROSITE_PROFILES); IPR003961 (PROSITE_PROFILES); IPR007110 (PROSITE_PROFILES); SSF48726 (SUPERFAMILY); IPR003961 (SUPERFAMILY); IPR003961 (SUPERFAMILY); SSF48726 (SUPERFAMILY)                                                                                                                |
| 1580 | c384_g1_i1_len_1016_path_53_0_1015_3                 | 106 | thioredoxin 2                                             | 339 | 2.57E-34  | 70.70% | 0.152   | IPR012336 (G3DSA:3.40.30.GENE3D); IPR013766 (PFAM); IPR005746 (PANTHER); PTHR10438:SF235 (PANTHER); CYTOPLASMIC_DOMAIN (PHOBIUS); NON_CYTOPLASMIC_DOMAIN (PHOBIUS); TRANSMEMBRANE (PHOBIUS); IPR012336 (PROSITE_PROFILES); IPR012336 (SUPERFAMILY); TMhelix (TMHMM)                                                                                                                                                                                                                                                                                                                                                                                                                                                   |
| 1581 | c3845_g1_i1_len_813_path_1_0_192_194_193_8_12_4      | 18  | protein disulfide                                         | 271 | 1.51E-104 | 79.70% | 0.099   | PR00421 (PRINTS); IPR012336 (G3DSA:3.40.30.GENE3D); IPR013766 (PFAM); IPR012336 (G3DSA:3.40.30.GENE3D); PTHR18929:SF85 (PANTHER); PTHR18929 (PANTHER); TRANSMEMBRANE (PHOBIUS); NON_CYTOPLASMIC_DOMAIN (PHOBIUS); CYTOPLASMIC_DOMAIN (PHOBIUS); IPR012336 (PROSITE_PROFILES); IPR012336 (SUPERFAMILY); IPR012336 (SUPERFAMILY); TMhelix (TMHMM)                                                                                                                                                                                                                                                                                                                                                                       |
| 1582 | c3845_g1_i2_len_655_path_1616_0_34_194_35_654_4      | 15  | protein disulfide                                         | 210 | 2.32E-105 | 79.90% | 0.099   | PR00421 (PRINTS); IPR012336 (G3DSA:3.40.30.GENE3D); IPR012336 (G3DSA:3.40.30.GENE3D); IPR013766 (PFAM); PTHR18929 (PANTHER); PTHR18929:SF85 (PANTHER); IPR012336 (PROSITE_PROFILES); IPR012336 (SUPERFAMILY); IPR012336 (SUPERFAMILY)                                                                                                                                                                                                                                                                                                                                                                                                                                                                                 |
| 1583 | c38524_g1_i1_len_808_path_1_0_807_2                  | 66  | spondin-2 isoform x1                                      | 263 | 8.17E-13  | 75.30% | 0.154   | IPR009465 (PFAM); TRANSMEMBRANE (PHOBIUS); NON_CYTOPLASMIC_DOMAIN (PHOBIUS); CYTOPLASMIC_DOMAIN (PHOBIUS); IPR009465 (PROSITE_PROFILES); TMhelix (TMHMM)                                                                                                                                                                                                                                                                                                                                                                                                                                                                                                                                                              |
| 1584 | c38776_g1_i1_len_272_path_250_0_271_4                | 0   | von willebrand factor c and egf domain-containing protein | 85  | 1.97E-07  | 54.30% | 0.107   | IPR001007 (SMART); IPR001007 (PFAM); G3DSA:2.10.70.10 (GENE3D); IPR001007 (PROSITE_PATTERNS); IPR001007 (PROSITE_PROFILES); SSF57603 (SUPERFAMILY)                                                                                                                                                                                                                                                                                                                                                                                                                                                                                                                                                                    |
| 1585 | c38881_g1_i1_len_444_path_1_0_443_1                  | 6   | protein sidekick-1                                        | 148 | 1.04E-10  | 55.50% | 0.145   | IPR003598 (SMART); IPR003599 (SMART); IPR013098 (PFAM); IPR013783 (G3DSA:2.60.40.GENE3D); PTHR10489 (PANTHER); IPR007110 (PROSITE_PROFILES); SSF48726 (SUPERFAMILY)                                                                                                                                                                                                                                                                                                                                                                                                                                                                                                                                                   |
| 1586 | c39099_g1_i1_len_534_path_1_0_533_2                  | 5   | carbohydrate binding domain protein                       | 178 | 1.47E-116 | 99.40% | 0.104   | IPR003610 (SMART)                                                                                                                                                                                                                                                                                                                                                                                                                                                                                                                                                                                                                                                                                                     |
| 1587 | c39156_g1_i1_len_525_path_503_0_524_3                | 5   | glutathione peroxidase                                    | 175 | 1.63E-08  | 64.50% | 0.297   | IPR000889 (PFAM); IPR012336 (G3DSA:3.40.30.GENE3D); IPR000889 (PANTHER); IPR029760 (PROSITE_PATTERNS); IPR000889 (PROSITE_PROFILES); IPR012336 (SUPERFAMILY)                                                                                                                                                                                                                                                                                                                                                                                                                                                                                                                                                          |
| 1588 | c39208_g1_i1_len_1063_path_1_0_1062_0                | 44  | ---NA---                                                  | 355 |           |        | 0.172   | Coil (COILS)                                                                                                                                                                                                                                                                                                                                                                                                                                                                                                                                                                                                                                                                                                          |
| 1589 | c39223_g1_i1_len_1321_path_1_0_1320_0                | 24  | angio-associated migratory cell                           | 434 | 2.85E-81  | 65.20% | 0.597 Y | IPR001680 (SMART); IPR015943 (G3DSA:2.130.10.GENE3D); IPR001680 (PFAM); PTHR19857 (PANTHER); IPR001680 (PROSITE_PROFILES); IPR001680 (PROSITE_PROFILES); IPR017986 (PROSITE_PROFILES); SignalP-noTM (SIGNALP_EUK); IPR011047 (SUPERFAMILY)                                                                                                                                                                                                                                                                                                                                                                                                                                                                            |
| 1590 | c393_g1_i1_len_1178_path_1195_0_341_2370_3_42_1177_4 | 32  | krueppel-like factor 6 isoform x1                         | 393 | 1.49E-109 | 63.30% | 0.105   | IPR015880 (SMART); PF13465 (PFAM); IPR013087 (G3DSA:3.30.160.GENE3D); IPR013087 (G3DSA:3.30.160.GENE3D); PTHR23223 (PANTHER); PTHR23223:SF132 (PANTHER); IPR007087 (PROSITE_PATTERNS); IPR007087 (PROSITE_PATTERNS); IPR007087 (PROSITE_PATTERNS); IPR007087 (PROSITE_PROFILES); IPR007087 (PROSITE_PROFILES); SSF57667 (SUPERFAMILY); SSF57667 (SUPERFAMILY)                                                                                                                                                                                                                                                                                                                                                         |

|      |                                                                                      |    |                                                                       |     |           |         |       |                                                                                                                                                                                                                                                                                                                                                                                           |
|------|--------------------------------------------------------------------------------------|----|-----------------------------------------------------------------------|-----|-----------|---------|-------|-------------------------------------------------------------------------------------------------------------------------------------------------------------------------------------------------------------------------------------------------------------------------------------------------------------------------------------------------------------------------------------------|
| 1591 | c39395_g1_i1_len_583_path_561_0_582_0                                                | 4  | endoplasmic reticulum mannosyl-oligosaccharide -<br>alpha-mannosidase | 195 | 2.66E-77  | 81.20%  | 0.104 | IPR001382 (PRINTS); IPR001382 (G3DSA:1.50.10.GENE3D); IPR001382 (PFAM); IPR001382 (PANTHER); PTHR11742:SF7 (PANTHER); IPR001382 (SUPERFAMILY)                                                                                                                                                                                                                                             |
| 1592 | c3965_g1_i1_len_1534_path_2483_0_1446_3930_1447_1473_3956_1474_1506_3930_1507_1533_1 | 99 | calcium activated chlorine                                            | 511 | 5.36E-18  | 54.60%  | 0.108 | IPR003961 (SMART); IPR013783 (G3DSA:2.60.40.GENE3D); PTHR10579 (PANTHER); TRANSMEMBRANE (PHOBIUS); NON_CYTOPLASMIC_DOMAIN (PHOBIUS); CYTOPLASMIC_DOMAIN (PHOBIUS); TRANSMEMBRANE (PHOBIUS); NON_CYTOPLASMIC_DOMAIN (PHOBIUS); CYTOPLASMIC_DOMAIN (PHOBIUS); TRANSMEMBRANE (PHOBIUS); IPR003961 (SUPERFAMILY); TMhelix (TMHMM); TMhelix (TMHMM); TMhelix (TMHMM)                           |
| 1593 | c3976_g1_i1_len_2029_path_1_0_1265_1267_1266_2028_3                                  | 94 | p38 mitogen-activated protein kinase                                  | 671 | 0         | 89.70%  | 0.11  | Coil (COILS); IPR008352 (PRINTS); IPR002290 (SMART); G3DSA:3.30.200.20 (GENE3D); IPR000719 (PFAM); G3DSA:1.10.510.10 (GENE3D); PTHR24055:SF110 (PANTHER); PTHR24055 (PANTHER); IPR017441 (PROSITE_PATTERNS); IPR003527 (PROSITE_PATTERNS); CYTOPLASMIC_DOMAIN (PHOBIUS); TRANSMEMBRANE (PHOBIUS); NON_CYTOPLASMIC_DOMAIN (PHOBIUS); IPR000719 (PROSITE_PROFILES); IPR011009 (SUPERFAMILY) |
| 1594 | c39841_g1_i1_len_1106_path_1084_0_1105_2                                             | 8  | receptor-type tyrosine-protein phosphatase mu-<br>partial             | 368 | 1.21E-46  | 54.20%  | 0.106 | Coil (COILS); IPR000242 (PRINTS); IPR003595 (SMART); IPR000242 (SMART); IPR029021 (G3DSA:3.90.190.GENE3D); IPR000242 (PFAM); PTHR19134:SF81 (PANTHER); PTHR19134 (PANTHER); IPR000387 (PROSITE_PROFILES); IPR000242 (PROSITE_PROFILES); IPR029021 (SUPERFAMILY)                                                                                                                           |
| 1595 | c39866_g1_i1_len_503_path_481_0_502_0                                                | 4  | apical endosomal glycoprotein                                         | 168 | 1.83E-19  | 68.60%  | 0.105 | IPR000998 (PFAM); PTHR23282 (PANTHER); IPR000998 (PROSITE_PROFILES); IPR013320 (SUPERFAMILY)                                                                                                                                                                                                                                                                                              |
| 1596 | c40070_g1_i1_len_613_path_1_0_612_0                                                  | 6  | fimbrial family protein                                               | 205 | 1.48E-105 | 100.00% | 0.104 | IPR000259 (PFAM); IPR000259 (G3DSA:2.60.40.GENE3D); IPR008966 (SUPERFAMILY)                                                                                                                                                                                                                                                                                                               |
| 1597 | c40289_g1_i1_len_295_path_1_0_294_1                                                  | 3  | hemocyte protein-glutamine gamma-<br>glutamyltransferase-like         | 98  | 1.33E-29  | 74.30%  | 0.122 | IPR013783 (G3DSA:2.60.40.GENE3D); IPR013783 (G3DSA:2.60.40.GENE3D); IPR029021 (G3DSA:3.90.190.GENE3D); IPR000242 (PFAM); PTHR11590:SF40 (PANTHER); IPR023608 (PANTHER); IPR008958 (SUPERFAMILY); IPR008958 (SUPERFAMILY)                                                                                                                                                                  |
| 1598 | c4065_g1_i1_len_340_path_1_0_88_90_89_112_1067_113_339_1                             | 5  | zinc finger protein 501-like                                          | 113 | 2.95E-21  | 61.20%  | 0.101 | IPR015880 (SMART); PF13465 (PFAM); IPR013087 (G3DSA:3.30.160.GENE3D); IPR013087 (G3DSA:3.30.160.GENE3D); PTHR24409:SF14 (PANTHER); PTHR24409 (PANTHER); IPR007087 (PROSITE_PATTERNS); IPR007087 (PROSITE_PATTERNS); IPR007087 (PROSITE_PATTERNS); IPR007087 (PROSITE_PROFILES); IPR007087 (PROSITE_PROFILES); SSF57667 (SUPERFAMILY); SSF57667 (SUPERFAMILY); SSF57667 (SUPERFAMILY)      |
| 1599 | c4065_g2_i1_len_328_path_898_0_145_90_146_169_114_170_327_1                          | 1  | zinc c2h2 type                                                        | 109 | 5.54E-14  | 61.10%  | 0.12  | IPR015880 (SMART); IPR013087 (G3DSA:3.30.160.GENE3D); IPR013087 (G3DSA:3.30.160.GENE3D); PF13465 (PFAM); IPR013087 (G3DSA:3.30.160.GENE3D); PTHR24409 (PANTHER); IPR007087 (PROSITE_PATTERNS); IPR007087 (PROSITE_PATTERNS); IPR007087 (PROSITE_PATTERNS); IPR007087 (PROSITE_PROFILES); IPR007087 (PROSITE_PROFILES); SSF57667 (SUPERFAMILY)                                             |
| 1600 | c40782_g1_i1_len_1328_path_1306_0_1327_1                                             | 32 | nicotinamide phosphoribosyltransferase-like                           | 443 | 1.99E-153 | 82.30%  | 0.107 | IPR007229 (PFAM); G3DSA:3.20.140.10 (GENE3D); IPR007229 (PANTHER); IPR016471 (PTHR11098:PANTHER); CYTOPLASMIC_DOMAIN (PHOBIUS); TRANSMEMBRANE (PHOBIUS); NON_CYTOPLASMIC_DOMAIN (PHOBIUS); IPR002638 (SUPERFAMILY)                                                                                                                                                                        |
| 1601 | c41039_g1_i1_len_562_path_540_0_561_2                                                | 3  | cathepsin I                                                           | 187 | 1.53E-96  | 81.80%  | 0.199 | IPR000668 (PRINTS); IPR000668 (SMART); IPR000668 (PFAM); G3DSA:3.90.70.10 (GENE3D); PTHR12411:SF57 (PANTHER); IPR013128 (PANTHER); IPR025661 (PROSITE_PATTERNS); IPR025660 (PROSITE_PATTERNS); IPR000169 (PROSITE_PATTERNS); SSF54001 (SUPERFAMILY)                                                                                                                                       |
| 1602 | c41726_g1_i1_len_948_path_1_0_947_1                                                  | 12 | beta- -n-acetylgalactosaminyltransferase bre-4                        | 316 | 4.14E-24  | 87.20%  | 0.105 | IPR029044 (G3DSA:3.90.550.GENE3D); IPR027791 (PFAM); IPR003859 (PANTHER); PTHR19300:SF30 (PANTHER); NON_CYTOPLASMIC_DOMAIN (PHOBIUS); NON_CYTOPLASMIC_DOMAIN (PHOBIUS); TRANSMEMBRANE (PHOBIUS); CYTOPLASMIC_DOMAIN (PHOBIUS); TRANSMEMBRANE (PHOBIUS); IPR029044 (SUPERFAMILY); TMhelix (TMHMM)                                                                                          |



|      |                                                               |    |                                                          |     |           |         |       |                                                                                                                                                                                                                                                                                                                                                                                                                                                                                           |
|------|---------------------------------------------------------------|----|----------------------------------------------------------|-----|-----------|---------|-------|-------------------------------------------------------------------------------------------------------------------------------------------------------------------------------------------------------------------------------------------------------------------------------------------------------------------------------------------------------------------------------------------------------------------------------------------------------------------------------------------|
| 1603 | c4249_g1_i1_len_1083_path_17_0_564_677_565_1082_0             | 18 | peroxisome biogenesis factor 10-like                     | 355 | 2.26E-71  | 57.30%  | 0.128 | IPR001841 (SMART); IPR001841 (PFAM); IPR013083 (G3DSA:3.30.40.GENE3D); IPR006845 (PFAM); IPR025654 (PANTHER); IPR017907 (PROSITE_PATTERNS); TRANSMEMBRANE (PHOBIUS); NON_CYTOPLASMIC_DOMAIN (PHOBIUS); NON_CYTOPLASMIC_DOMAIN (PHOBIUS); TRANSMEMBRANE (PHOBIUS); CYTOPLASMIC_DOMAIN (PHOBIUS); CYTOPLASMIC_DOMAIN (PHOBIUS); IPR001841 (PROSITE_PROFILES); SSF57850 (SUPERFAMILY)                                                                                                        |
| 1604 | c4249_g1_i2_len_1178_path_17_0_564_582_565_659_677_660_1177_2 | 22 | peroxisome biogenesis factor 10                          | 386 | 9.22E-26  | 60.20%  | 0.111 | IPR001841 (SMART); PF13923 (PFAM); IPR013083 (G3DSA:3.30.40.GENE3D); IPR025654 (PANTHER); IPR017907 (PROSITE_PATTERNS); IPR001841 (PROSITE_PROFILES); SSF57850 (SUPERFAMILY)                                                                                                                                                                                                                                                                                                              |
| 1605 | c42763_g1_i1_len_448_path_1_0_447_4                           | 3  | laminin beta 1                                           | 149 | 4.41E-62  | 74.40%  | 0.124 | IPR002049 (SMART); G3DSA:2.10.25.10 (GENE3D); IPR002049 (PFAM); PTHR10574 (PANTHER); PTHR10574:SF238 (PANTHER); IPR002049 (PROSITE_PATTERNS); IPR013015 (PROSITE_PROFILES); IPR002049 (PROSITE_PROFILES); SSF57196 (SUPERFAMILY)                                                                                                                                                                                                                                                          |
| 1606 | c4294_g1_i1_len_1431_path_53_0_1430_4                         | 81 | mitochondrial cardiolipin hydrolase-like                 | 477 | 1.85E-60  | 66.40%  | 0.186 | G3DSA:3.30.870.10 (GENE3D); IPR025202 (PFAM); PTHR21248 (PANTHER); CYTOPLASMIC_DOMAIN (PHOBIUS); CYTOPLASMIC_DOMAIN (PHOBIUS); TRANSMEMBRANE (PHOBIUS); NON_CYTOPLASMIC_DOMAIN (PHOBIUS); NON_CYTOPLASMIC_DOMAIN (PHOBIUS); TRANSMEMBRANE (PHOBIUS); CYTOPLASMIC_DOMAIN (PHOBIUS); TRANSMEMBRANE (PHOBIUS); TRANSMEMBRANE (PHOBIUS); IPR001736 (PROSITE_PROFILES); SSF56024 (SUPERFAMILY); TMhelix (TMHMM); TMhelix (TMHMM); TMhelix (TMHMM)                                              |
| 1607 | c42985_g1_i1_len_364_path_342_0_363_1                         | 2  | protein kinase dc2                                       | 121 | 4.56E-76  | 95.90%  | 0.125 | IPR002290 (SMART); IPR000719 (PFAM); G3DSA:1.10.510.10 (GENE3D); PTHR24353 (PANTHER); IPR008271 (PROSITE_PATTERNS); IPR000719 (PROSITE_PROFILES); IPR011009 (SUPERFAMILY)                                                                                                                                                                                                                                                                                                                 |
| 1608 | c4304_g1_i1_len_492_path_1_0_491_1                            | 3  | trna binding domain protein                              | 164 | 4.01E-73  | 99.90%  | 0.103 | IPR012340 (G3DSA:2.40.50.GENE3D); IPR002547 (PFAM); PTHR11586 (PANTHER); IPR002547 (PROSITE_PROFILES); IPR012340 (SUPERFAMILY)                                                                                                                                                                                                                                                                                                                                                            |
| 1609 | c43104_g1_i1_len_1067_path_1_0_1066_5                         | 7  | epsilon-sarcoglycan isoform x2                           | 355 | 1.12E-87  | 61.50%  | 0.119 | IPR008908 (PFAM); IPR001304 (PFAM); IPR016186 (G3DSA:3.10.100.GENE3D); IPR008908 (PANTHER); PTHR10132:SF14 (PANTHER); CYTOPLASMIC_DOMAIN (PHOBIUS); NON_CYTOPLASMIC_DOMAIN (PHOBIUS); TRANSMEMBRANE (PHOBIUS); IPR001304 (PROSITE_PROFILES); IPR016187 (SUPERFAMILY); TMhelix (TMHMM)                                                                                                                                                                                                     |
| 1610 | c43125_g1_i1_len_431_path_1_0_430_4                           | 0  | low-density lipoprotein receptor-related protein partial | 144 | 4.06E-07  | 41.67%  | 0.31  | NON_CYTOPLASMIC_DOMAIN (PHOBIUS); SIGNAL_PEPTIDE_C_REGION (PHOBIUS); SIGNAL_PEPTIDE_H_REGION (PHOBIUS); SIGNAL_PEPTIDE (PHOBIUS); SIGNAL_PEPTIDE_N_REGION (PHOBIUS); SignalP-noTM (SIGNALP_GRAM_NEGATIVE); IPR002172 (SUPERFAMILY)                                                                                                                                                                                                                                                        |
| 1611 | c43246_g1_i1_len_900_path_1_0_899_4                           | 9  | protein kinase c-binding protein nell1-like isoform x2   | 300 | 2.26E-68  | 60.60%  | 0.104 | IPR001007 (SMART); G3DSA:2.10.70.10 (GENE3D); IPR001007 (PFAM); PTHR24042:SF4 (PANTHER); PTHR24042 (PANTHER); IPR001007 (PROSITE_PATTERNS); IPR000152 (PROSITE_PATTERNS); IPR001007 (PROSITE_PROFILES); IPR001007 (PROSITE_PROFILES); SSF57603 (SUPERFAMILY); SSF57603 (SUPERFAMILY)                                                                                                                                                                                                      |
| 1612 | c43419_g1_i1_len_251_path_229_0_250_4                         | 2  | 3-hydroxyisobutyrate dehydrogenase                       | 84  | 5.28E-37  | 90.60%  | 0.121 | IPR016040 (G3DSA:3.40.50.GENE3D); IPR029154 (PFAM); IPR006115 (PFAM); IPR013328 (G3DSA:1.10.1040.GENE3D); PTHR22981:SF7 (PANTHER); PTHR22981 (PANTHER); IPR008927 (SUPERFAMILY); SSF51735 (SUPERFAMILY)                                                                                                                                                                                                                                                                                   |
| 1613 | c44048_g1_i1_len_599_path_577_0_598_2                         | 6  | alpha c-terminal all-beta domain protein                 | 199 | 1.75E-141 | 98.00%  | 0.116 | IPR017853 (SUPERFAMILY)                                                                                                                                                                                                                                                                                                                                                                                                                                                                   |
| 1614 | c4440_g1_i1_len_1388_path_1366_0_1387_4                       | 43 | guanylate kinase isoform x2                              | 458 | 1.62E-89  | 83.40%  | 0.247 | IPR008145 (SMART); IPR017665 (TIGRFAM); IPR027417 (G3DSA:3.40.50.GENE3D); IPR027417 (G3DSA:3.40.50.GENE3D); G3DSA:3.30.63.10 (GENE3D); IPR008145 (PFAM); PTHR23117 (PANTHER); PTHR23117:SF13 (PANTHER); NON_CYTOPLASMIC_DOMAIN (PHOBIUS); NON_CYTOPLASMIC_DOMAIN (PHOBIUS); CYTOPLASMIC_DOMAIN (PHOBIUS); TRANSMEMBRANE (PHOBIUS); CYTOPLASMIC_DOMAIN (PHOBIUS); TRANSMEMBRANE (PHOBIUS); TRANSMEMBRANE (PHOBIUS); IPR008144 (PROSITE_PROFILES); IPR027417 (SUPERFAMILY); TMhelix (TMHMM) |
| 1615 | c44660_g1_i1_len_423_path_1_0_422_1                           | 2  | carcinolectin 5a isoform                                 | 141 | 1.27E-24  | 65.40%  | 0.164 | IPR002181 (SMART); IPR014716 (G3DSA:3.90.215.GENE3D); IPR014715 (G3DSA:4.10.530.GENE3D); IPR002181 (PFAM); PTHR19143 (PANTHER); IPR020837 (PROSITE_PATTERNS); IPR002181 (PROSITE_PROFILES); IPR002181 (SUPERFAMILY)                                                                                                                                                                                                                                                                       |
| 1616 | c45002_g1_i1_len_247_path_1_0_246_0                           | 0  | flagellar hook-associated protein 1 domain protein       | 83  | 3.85E-49  | 100.00% | 0.15  | IPR002371 (PRINTS); PTHR30033:SF0 (PANTHER); PTHR30033 (PANTHER)                                                                                                                                                                                                                                                                                                                                                                                                                          |

|      |                                                             |    |                                                                                                                                                                                                                       |     |          |        |         |                                                                                                                                                                                                                                                                                                                                                                                                                                                                                                                                                                                                                                                                                                                            |
|------|-------------------------------------------------------------|----|-----------------------------------------------------------------------------------------------------------------------------------------------------------------------------------------------------------------------|-----|----------|--------|---------|----------------------------------------------------------------------------------------------------------------------------------------------------------------------------------------------------------------------------------------------------------------------------------------------------------------------------------------------------------------------------------------------------------------------------------------------------------------------------------------------------------------------------------------------------------------------------------------------------------------------------------------------------------------------------------------------------------------------------|
| 1617 | c45221_g1_i1_len_206_path_1_0_205_5                         | 2  | zinc c2h2 type domain-containing protein                                                                                                                                                                              | 68  | 5.67E-10 | 57.60% | 0.099   | IPR015880 (SMART); IPR007087 (PFAM); PF13894 (PFAM); IPR013087 (G3DSA:3.30.160.GENE3D); IPR007087 (PROSITE_PATTERNS); IPR007087 (PROSITE_PATTERNS); IPR007087 (PROSITE_PROFILES); IPR007087 (PROSITE_PROFILES); SSF57667 (SUPERFAMILY)                                                                                                                                                                                                                                                                                                                                                                                                                                                                                     |
| 1618 | c455_g1_i1_len_1151_path_304_0_1001_25_100_2_1150_2         | 31 | zinc finger protein                                                                                                                                                                                                   | 383 | 3.35E-57 | 65.90% | 0.133   | IPR015880 (SMART); IPR013087 (G3DSA:3.30.160.GENE3D); IPR013087 (G3DSA:3.30.160.GENE3D); IPR013087 (G3DSA:3.30.160.GENE3D); IPR007087 (PFAM); PF13465 (PFAM); PTHR24409 (PANTHER); IPR007087 (PROSITE_PATTERNS); IPR007087 (PROSITE_PATTERNS); IPR007087 (PROSITE_PATTERNS); IPR007087 (PROSITE_PATTERNS); IPR007087 (PROSITE_PATTERNS); IPR007087 (PROSITE_PATTERNS); NON_CYTOPLASMIC_DOMAIN (PHOBIUS); TRANSMEMBRANE (PHOBIUS); CYTOPLASMIC_DOMAIN (PHOBIUS); IPR007087 (PROSITE_PROFILES); IPR007087 (PROSITE_PROFILES); IPR007087 (PROSITE_PROFILES); IPR007087 (PROSITE_PROFILES); IPR007087 (PROSITE_PROFILES); IPR007087 (PROSITE_PROFILES); SSF57667 (SUPERFAMILY); SSF57667 (SUPERFAMILY); SSF57667 (SUPERFAMILY) |
| 1619 | c46046_g1_i1_len_536_path_1_0_512_514_513_533_535_534_535_2 | 3  | heat shock 70 kda protein cognate 4                                                                                                                                                                                   | 178 | 4.22E-53 | 84.10% | 0.101   | IPR029048 (G3DSA:1.20.1270.GENE3D); IPR013126 (PFAM); PTHR19375:SF142 (PANTHER); PTHR19375 (PANTHER); NON_CYTOPLASMIC_DOMAIN (PHOBIUS); CYTOPLASMIC_DOMAIN (PHOBIUS); TRANSMEMBRANE (PHOBIUS); IPR029048 (SUPERFAMILY)                                                                                                                                                                                                                                                                                                                                                                                                                                                                                                     |
| 1620 | c46352_g1_i1_len_767_path_761_0_766_0                       | 17 | trafficking protein particle complex subunit 1                                                                                                                                                                        | 256 | 6.05E-60 | 86.10% | 0.19    | IPR007233 (PFAM); G3DSA:3.30.450.70 (GENE3D); PTHR23249:SF16 (PANTHER); IPR007233 (PANTHER); NON_CYTOPLASMIC_DOMAIN (PHOBIUS); CYTOPLASMIC_DOMAIN (PHOBIUS); TRANSMEMBRANE (PHOBIUS); IPR011012 (SUPERFAMILY); TMhelix (TMHMM)                                                                                                                                                                                                                                                                                                                                                                                                                                                                                             |
| 1621 | c46487_g1_i1_len_438_path_568_0_437_2                       | 1  | brca1-associated ring domain protein 1                                                                                                                                                                                | 146 | 9.51E-38 | 68.90% | 0.102   | IPR002110 (PRINTS); IPR002110 (SMART); IPR020683 (PFAM); IPR002110 (PFAM); IPR020683 (G3DSA:1.25.40.GENE3D); PTHR24171:SF9 (PANTHER); PTHR24171 (PANTHER); IPR020683 (PROSITE_PROFILES); IPR002110 (PROSITE_PROFILES); IPR002110 (PROSITE_PROFILES); IPR002110 (PROSITE_PROFILES); IPR020683 (SUPERFAMILY)                                                                                                                                                                                                                                                                                                                                                                                                                 |
| 1622 | c46728_g1_i1_len_583_path_561_0_582_4                       | 14 | aplp_manse ame: full=apolipophorins contains: ame: full=apolipophorin-2 ame: full=apolipophorin ii ame: full=apolp-2 contains: ame: full=apolipophorin-1 ame: full=apolipophorin i ame: full=apolp-1 flags: precursor | 194 | 6.93E-22 | 51.50% | 0.1     | no IPS match                                                                                                                                                                                                                                                                                                                                                                                                                                                                                                                                                                                                                                                                                                               |
| 1623 | c46764_g1_i1_len_290_path_1_0_289_4                         | 1  | tollod-like protein                                                                                                                                                                                                   | 97  | 5.53E-08 | 56.30% | 0.101   | IPR001506 (PRINTS); IPR001506 (PFAM); IPR024079 (G3DSA:3.40.390.GENE3D)                                                                                                                                                                                                                                                                                                                                                                                                                                                                                                                                                                                                                                                    |
| 1624 | c46893_g1_i1_len_334_path_312_0_333_0                       | 2  | #NAME?                                                                                                                                                                                                                | 112 | 5.29E-73 | 99.10% | 0.101   | IPR020471 (PRINTS); IPR023210 (PFAM); IPR023210 (G3DSA:3.20.20.GENE3D); IPR001395 (PANTHER); PTHR11732:SF100 (PANTHER); IPR018170 (PROSITE_PATTERNS); IPR023210 (SUPERFAMILY)                                                                                                                                                                                                                                                                                                                                                                                                                                                                                                                                              |
| 1625 | c47090_g1_i1_len_442_path_1_0_441_4                         | 3  | acyloxyacyl hydrolase                                                                                                                                                                                                 | 147 | 2.92E-38 | 64.40% | 0.144   | PTHR15010 (PANTHER)                                                                                                                                                                                                                                                                                                                                                                                                                                                                                                                                                                                                                                                                                                        |
| 1626 | c47119_g1_i1_len_978_path_956_0_977_0                       | 5  | protein fam3c-like                                                                                                                                                                                                    | 326 | 1.74E-23 | 63.50% | 0.128   | PTHR14592:SF7 (PANTHER); IPR026101 (PANTHER); NON_CYTOPLASMIC_DOMAIN (PHOBIUS); TRANSMEMBRANE (PHOBIUS); CYTOPLASMIC_DOMAIN (PHOBIUS); CYTOPLASMIC_DOMAIN (PHOBIUS); NON_CYTOPLASMIC_DOMAIN (PHOBIUS); TRANSMEMBRANE (PHOBIUS); TMhelix (TMHMM); TMhelix (TMHMM)                                                                                                                                                                                                                                                                                                                                                                                                                                                           |
| 1627 | c47119_g1_i1_len_978_path_956_0_977_1                       | 5  | protein partial                                                                                                                                                                                                       | 326 | 1.11E-25 | 59.00% | 0.276   | PTHR14592:SF7 (PANTHER); IPR026101 (PANTHER); TRANSMEMBRANE (PHOBIUS); CYTOPLASMIC_DOMAIN (PHOBIUS); NON_CYTOPLASMIC_DOMAIN (PHOBIUS)                                                                                                                                                                                                                                                                                                                                                                                                                                                                                                                                                                                      |
| 1628 | c47237_g1_i1_len_484_path_1_0_483_1                         | 11 | neogenin isoform x3                                                                                                                                                                                                   | 161 | 6.07E-12 | 74.20% | 0.107   | IPR013098 (PFAM); IPR013783 (G3DSA:2.60.40.GENE3D); TRANSMEMBRANE (PHOBIUS); CYTOPLASMIC_DOMAIN (PHOBIUS); NON_CYTOPLASMIC_DOMAIN (PHOBIUS); IPR007110 (PROSITE_PROFILES); SSF48726 (SUPERFAMILY)                                                                                                                                                                                                                                                                                                                                                                                                                                                                                                                          |
| 1629 | c4773_g1_i1_len_916_path_944_0_915_2                        | 32 | perlucin-like protein                                                                                                                                                                                                 | 299 | 4.96E-22 | 53.70% | 0.943 Y | Coil (COILS); IPR001304 (SMART); IPR016186 (G3DSA:3.10.100.GENE3D); IPR001304 (PFAM); PTHR22802 (PANTHER); IPR018378 (PROSITE_PATTERNS); SIGNAL_PEPTIDE_H_REGION (PHOBIUS); SIGNAL_PEPTIDE (PHOBIUS); NON_CYTOPLASMIC_DOMAIN (PHOBIUS); SIGNAL_PEPTIDE_N_REGION (PHOBIUS); SIGNAL_PEPTIDE_C_REGION (PHOBIUS); IPR001304 (PROSITE_PROFILES); SignalP-TM (SIGNALP_GRAM_POSITIVE); SignalP-noTM (SIGNALP_EUK); SignalP-noTM (SIGNALP_GRAM_NEGATIVE); IPR016187 (SUPERFAMILY)                                                                                                                                                                                                                                                  |
| 1630 | c48133_g1_i1_len_706_path_1_0_705_3                         | 5  | allene oxide synthase-lipoxygenase partial                                                                                                                                                                            | 236 | 6.73E-76 | 70.00% | 0.101   | Coil (COILS); IPR013819 (PFAM); G3DSA:1.20.245.10 (GENE3D); PTHR11771:SF43 (PANTHER); IPR000907 (PANTHER); IPR013819 (PROSITE_PROFILES); IPR013819 (SUPERFAMILY)                                                                                                                                                                                                                                                                                                                                                                                                                                                                                                                                                           |

|      |                                                     |    |                                                               |     |          |        |       |                                                                                                                                                                                                                                                                                                                                                                                                                                                                                                                                                                     |
|------|-----------------------------------------------------|----|---------------------------------------------------------------|-----|----------|--------|-------|---------------------------------------------------------------------------------------------------------------------------------------------------------------------------------------------------------------------------------------------------------------------------------------------------------------------------------------------------------------------------------------------------------------------------------------------------------------------------------------------------------------------------------------------------------------------|
| 1631 | c4835_g1_i1_len_820_path_185_0_565_184_566_819_4    | 5  | neuroglian isoform x1                                         | 273 | 2.66E-66 | 85.80% | 0.125 | IPR003598 (SMART); IPR013098 (PFAM); IPR013783 (G3DSA:2.60.40.GENE3D); PTHR10489 (PANTHER); PTHR10489:SF553 (PANTHER); NON_CYTOPLASMIC_DOMAIN (PHOBIUS); TRANSMEMBRANE (PHOBIUS); CYTOPLASMIC_DOMAIN (PHOBIUS); CYTOPLASMIC_DOMAIN (PHOBIUS); NON_CYTOPLASMIC_DOMAIN (PHOBIUS); TRANSMEMBRANE (PHOBIUS); TRANSMEMBRANE (PHOBIUS); IPR007110 (PROSITE_PROFILES); SSF48726 (SUPERFAMILY); TMhelix (TMHMM)                                                                                                                                                             |
| 1632 | c49415_g1_i1_len_352_path_330_0_351_2               | 2  | lipase 3                                                      | 117 | 2.94E-56 | 77.80% | 0.117 | IPR006693 (PFAM); IPR029058 (G3DSA:3.40.50.GENE3D); PTHR11005 (PANTHER); IPR029058 (SUPERFAMILY)                                                                                                                                                                                                                                                                                                                                                                                                                                                                    |
| 1633 | c49923_g1_i1_len_459_path_1_0_458_1                 | 4  | pa domain-containing protein                                  | 153 | 5.61E-44 | 77.60% | 0.102 | IPR003137 (PFAM); G3DSA:3.50.30.30 (GENE3D); PTHR22702 (PANTHER); CYTOPLASMIC_DOMAIN (PHOBIUS); TRANSMEMBRANE (PHOBIUS); NON_CYTOPLASMIC_DOMAIN (PHOBIUS); TMhelix (TMHMM)                                                                                                                                                                                                                                                                                                                                                                                          |
| 1634 | c50010_g1_i1_len_860_path_838_0_859_2               | 7  | muscle calcium channel subunit alpha-1 isoform x1             | 286 | 3.06E-17 | 79.00% | 0.323 | IPR005821 (PFAM); IPR027359 (G3DSA:1.20.120.GENE3D); PTHR10037:SF195 (PANTHER); PTHR10037 (PANTHER); TRANSMEMBRANE (PHOBIUS); TRANSMEMBRANE (PHOBIUS); TRANSMEMBRANE (PHOBIUS); TRANSMEMBRANE (PHOBIUS); CYTOPLASMIC_DOMAIN (PHOBIUS); NON_CYTOPLASMIC_DOMAIN (PHOBIUS); NON_CYTOPLASMIC_DOMAIN (PHOBIUS); CYTOPLASMIC_DOMAIN (PHOBIUS); NON_CYTOPLASMIC_DOMAIN (PHOBIUS); CYTOPLASMIC_DOMAIN (PHOBIUS); TMhelix (TMHMM); TMhelix (TMHMM); TMhelix (TMHMM)                                                                                                          |
| 1635 | c50256_g1_i1_len_217_path_195_0_216_2               | 0  | zinc finger protein                                           | 72  | 3.61E-12 | 58.70% | 0.098 | IPR015880 (SMART); IPR013087 (G3DSA:3.30.160.GENE3D); PF13465 (PFAM); IPR013087 (G3DSA:3.30.160.GENE3D); IPR013087 (G3DSA:3.30.160.GENE3D); PTHR24409 (PANTHER); PTHR24409:SF13 (PANTHER); IPR007087 (PROSITE_PATTERNS); IPR007087 (PROSITE_PATTERNS); IPR007087 (PROSITE_PROFILES); IPR007087 (PROSITE_PROFILES); SSF57667 (SUPERFAMILY)                                                                                                                                                                                                                           |
| 1636 | c50412_g1_i1_len_458_path_1_0_457_1                 | 1  | short-chain dehydrogenase reductase family 16c member partial | 153 | 5.97E-61 | 74.70% | 0.12  | IPR002347 (PRINTS); IPR002198 (PRINTS); IPR016040 (G3DSA:3.40.50.GENE3D); IPR002198 (PFAM); PTHR24316 (PANTHER); PTHR24316:SF289 (PANTHER); SSF51735 (SUPERFAMILY)                                                                                                                                                                                                                                                                                                                                                                                                  |
| 1637 | c5093_g1_i2_len_1452_path_1_0_565_567_566_1451_0    | 69 | adiponectin receptor protein                                  | 484 | 0        | 80.70% | 0.139 | IPR004254 (PFAM); PTHR20855:SF15 (PANTHER); IPR004254 (PANTHER); CYTOPLASMIC_DOMAIN (PHOBIUS); NON_CYTOPLASMIC_DOMAIN (PHOBIUS); TRANSMEMBRANE (PHOBIUS); NON_CYTOPLASMIC_DOMAIN (PHOBIUS); TRANSMEMBRANE (PHOBIUS); TRANSMEMBRANE (PHOBIUS); CYTOPLASMIC_DOMAIN (PHOBIUS); NON_CYTOPLASMIC_DOMAIN (PHOBIUS); TRANSMEMBRANE (PHOBIUS); CYTOPLASMIC_DOMAIN (PHOBIUS); TRANSMEMBRANE (PHOBIUS); TRANSMEMBRANE (PHOBIUS); TRANSMEMBRANE (PHOBIUS); TMhelix (TMHMM); TMhelix (TMHMM); TMhelix (TMHMM); TMhelix (TMHMM); TMhelix (TMHMM)                                 |
| 1638 | c5095_g1_i2_len_1038_path_2823_0_482_25_48_3_1037_4 | 34 | transposase                                                   | 346 | 7.70E-43 | 57.50% | 0.123 | no IPS match                                                                                                                                                                                                                                                                                                                                                                                                                                                                                                                                                        |
| 1639 | c5111_g1_i1_len_1307_path_1_0_1306_0                | 42 | histone-lysine n-methyltransferase prdm9-like                 | 430 | 1.88E-55 | 65.50% | 0.109 | IPR015880 (SMART); IPR013087 (G3DSA:3.30.160.GENE3D); PF13465 (PFAM); IPR013087 (G3DSA:3.30.160.GENE3D); PF13912 (PFAM); IPR013087 (G3DSA:3.30.160.GENE3D); PTHR24409 (PANTHER); IPR007087 (PROSITE_PATTERNS); IPR007087 (PROSITE_PATTERNS); IPR007087 (PROSITE_PATTERNS); IPR007087 (PROSITE_PATTERNS); IPR007087 (PROSITE_PATTERNS); IPR007087 (PROSITE_PROFILES); IPR007087 (PROSITE_PROFILES); IPR007087 (PROSITE_PROFILES); IPR007087 (PROSITE_PROFILES); IPR007087 (PROSITE_PROFILES); SSF57667 (SUPERFAMILY); SSF57667 (SUPERFAMILY); SSF57667 (SUPERFAMILY) |
| 1640 | c51614_g1_i1_len_318_path_1_0_317_3                 | 2  | locomotion-related protein hikaru genki-like                  | 106 | 1.08E-40 | 77.00% | 0.149 | IPR000436 (SMART); IPR000436 (PFAM); G3DSA:2.10.70.10 (GENE3D); G3DSA:2.10.70.10 (GENE3D); PTHR19325:SF340 (PANTHER); PTHR19325 (PANTHER); IPR000436 (PROSITE_PROFILES); IPR000436 (PROSITE_PROFILES); IPR000436 (SUPERFAMILY); IPR000436 (SUPERFAMILY)                                                                                                                                                                                                                                                                                                             |
| 1641 | c51656_g1_i1_len_234_path_212_0_233_1               | 0  | peptidyl-alpha-hydroxyglycine alpha-amidating lyase 1         | 78  | 1.09E-08 | 64.10% | 0.103 | PTHR10680 (PANTHER)                                                                                                                                                                                                                                                                                                                                                                                                                                                                                                                                                 |
| 1642 | c52085_g1_i1_len_618_path_596_0_617_0               | 4  | sulfakinin precursor                                          | 206 | 3.06E-09 | 75.11% | 0.101 | IPR013152 (PROSITE_PATTERNS); IPR013152 (PROSITE_PATTERNS)                                                                                                                                                                                                                                                                                                                                                                                                                                                                                                          |

|      |                                                               |      |                                                          |     |           |        |         |                                                                                                                                                                                                                                                                                                                                                                                                                                                                                                                                                 |
|------|---------------------------------------------------------------|------|----------------------------------------------------------|-----|-----------|--------|---------|-------------------------------------------------------------------------------------------------------------------------------------------------------------------------------------------------------------------------------------------------------------------------------------------------------------------------------------------------------------------------------------------------------------------------------------------------------------------------------------------------------------------------------------------------|
| 1643 | c5300_g1_i1_len_911_path_889_0_910_0                          | 18   | cathepsin I-associated protein                           | 304 | 3.94E-62  | 59.30% | 0.435 Y | IPR000782 (SMART); IPR000782 (G3DSA:2.30.180.GENE3D); IPR000782 (G3DSA:2.30.180.GENE3D); IPR000782 (PFAM); PTHR10900 (PANTHER); SIGNAL_PEPTIDE_N_REGION (PHOBIUS); SIGNAL_PEPTIDE_C_REGION (PHOBIUS); SIGNAL_PEPTIDE (PHOBIUS); SIGNAL_PEPTIDE_H_REGION (PHOBIUS); NON_CYTOPLASMIC_DOMAIN (PHOBIUS); IPR000782 (PROSITE_PROFILES); IPR000782 (PROSITE_PROFILES); IPR000782 (SUPERFAMILY); IPR000782 (SUPERFAMILY)                                                                                                                               |
| 1644 | c53660_g1_i1_len_333_path_1_0_332_2                           | 0    | peripheral plasma membrane protein cask isoform x2       | 111 | 4.11E-58  | 96.90% | 0.412 Y | IPR001478 (G3DSA:2.30.42.GENE3D); PTHR23122:SF7 (PANTHER); PTHR23122 (PANTHER); IPR001478 (SUPERFAMILY)                                                                                                                                                                                                                                                                                                                                                                                                                                         |
| 1645 | c5375_g2_i1_len_738_path_1866_0_676_855_677_700_879_701_737_3 | 26   | serine protease nudel                                    | 240 | 1.05E-34  | 75.10% | 0.136   | IPR002172 (SMART); IPR002172 (PFAM); G3DSA:2.40.10.10 (GENE3D); IPR002172 (G3DSA:4.10.400.GENE3D); IPR001254 (PFAM); PTHR24256 (PANTHER); PTHR24256:SF95 (PANTHER); IPR023415 (PROSITE_PATTERNS); IPR002172 (PROSITE_PROFILES); IPR002172 (SUPERFAMILY); IPR009003 (SUPERFAMILY)                                                                                                                                                                                                                                                                |
| 1646 | c5410_g1_i1_len_1978_path_53_0_1977_2                         | 9092 | retinal dehydrogenase 1-like                             | 653 | 0         | 82.10% | 0.113   | IPR016163 (G3DSA:3.40.309.GENE3D); IPR016162 (G3DSA:3.40.605.GENE3D); IPR015590 (PFAM); PTHR11699:SF145 (PANTHER); PTHR11699 (PANTHER); IPR029510 (PROSITE_PATTERNS); IPR016160 (PROSITE_PATTERNS); TRANSMEMBRANE (PHOBIUS); CYTOPLASMIC_DOMAIN (PHOBIUS); NON_CYTOPLASMIC_DOMAIN (PHOBIUS); NON_CYTOPLASMIC_DOMAIN (PHOBIUS); TRANSMEMBRANE (PHOBIUS); IPR016161 (SUPERFAMILY); TMhelix (TMHMM); TMhelix (TMHMM)                                                                                                                               |
| 1647 | c5439_g1_i1_len_697_path_1_0_696_0                            | 14   | transmembrane protease serine 12                         | 233 | 8.69E-23  | 62.00% | 0.136   | IPR001254 (PFAM); G3DSA:2.40.10.10 (GENE3D); PTHR24265 (PANTHER); IPR018114 (PROSITE_PATTERNS); IPR001254 (PROSITE_PROFILES); IPR009003 (SUPERFAMILY)                                                                                                                                                                                                                                                                                                                                                                                           |
| 1648 | c5443_g1_i1_len_1530_path_1_0_1433_4442_1434_1529_2           | 50   | limbic system-associated membrane protein                | 510 | 5.00E-150 | 69.70% | 0.122   | IPR003599 (SMART); IPR003598 (SMART); IPR013783 (G3DSA:2.60.40.GENE3D); IPR013098 (PFAM); IPR013783 (G3DSA:2.60.40.GENE3D); IPR013783 (G3DSA:2.60.40.GENE3D); IPR003961 (PFAM); PTHR19831 (PANTHER); PTHR19831:SF47 (PANTHER); IPR007110 (PROSITE_PROFILES); IPR003961 (PROSITE_PROFILES); IPR007110 (PROSITE_PROFILES); IPR007110 (PROSITE_PROFILES); SSF48726 (SUPERFAMILY); SSF48726 (SUPERFAMILY); IPR003961 (SUPERFAMILY); SSF48726 (SUPERFAMILY)                                                                                          |
| 1649 | c5443_g1_i2_len_2184_path_1_0_1433_1435_1434_2183_2           | 102  | limbic system-associated membrane protein                | 722 | 1.99E-146 | 68.50% | 0.122   | IPR003599 (SMART); IPR003598 (SMART); IPR013783 (G3DSA:2.60.40.GENE3D); IPR013098 (PFAM); IPR003961 (PFAM); IPR013783 (G3DSA:2.60.40.GENE3D); IPR013783 (G3DSA:2.60.40.GENE3D); PTHR19831 (PANTHER); PTHR19831:SF47 (PANTHER); TRANSMEMBRANE (PHOBIUS); NON_CYTOPLASMIC_DOMAIN (PHOBIUS); CYTOPLASMIC_DOMAIN (PHOBIUS); IPR007110 (PROSITE_PROFILES); IPR007110 (PROSITE_PROFILES); IPR007110 (PROSITE_PROFILES); IPR003961 (PROSITE_PROFILES); SSF48726 (SUPERFAMILY); IPR003961 (SUPERFAMILY); SSF48726 (SUPERFAMILY); SSF48726 (SUPERFAMILY) |
| 1650 | c5493_g1_i2_len_2028_path_2006_0_663_2670_664_2027_2          | 75   | ccr4-not transcription complex subunit 6-like isoform x1 | 676 | 0         | 85.10% | 0.114   | IPR003591 (SMART); IPR005135 (PFAM); G3DSA:3.80.10.10 (GENE3D); IPR005135 (G3DSA:3.60.10.GENE3D); PTHR12121:SF34 (PANTHER); PTHR12121 (PANTHER); IPR001611 (PROSITE_PROFILES); IPR001611 (PROSITE_PROFILES); IPR005135 (SUPERFAMILY); SSF52058 (SUPERFAMILY)                                                                                                                                                                                                                                                                                    |
| 1651 | c5494_g1_i1_len_1432_path_1_0_741_743_742_916_918_917_1431_5  | 30   | upf0364 protein c6orf211 homolog                         | 477 | 1.74E-121 | 62.40% | 0.21    | IPR002791 (PFAM); PTHR12260 (PANTHER); PTHR12260:SF1 (PANTHER); CYTOPLASMIC_DOMAIN (PHOBIUS); TRANSMEMBRANE (PHOBIUS); NON_CYTOPLASMIC_DOMAIN (PHOBIUS); IPR002791 (SUPERFAMILY)                                                                                                                                                                                                                                                                                                                                                                |
| 1652 | c5494_g1_i2_len_1432_path_1_0_741_3040_742_916_918_917_1431_5 | 23   | upf0364 protein c6orf211 homolog                         | 477 | 9.38E-121 | 62.60% | 0.21    | IPR002791 (PFAM); PTHR12260 (PANTHER); PTHR12260:SF1 (PANTHER); CYTOPLASMIC_DOMAIN (PHOBIUS); TRANSMEMBRANE (PHOBIUS); NON_CYTOPLASMIC_DOMAIN (PHOBIUS); IPR002791 (SUPERFAMILY)                                                                                                                                                                                                                                                                                                                                                                |
| 1653 | c5575_g1_i1_len_468_path_1_0_467_1                            | 4    | ectonucleoside triphosphate diphosphohydrolase 4         | 156 | 1.71E-53  | 72.90% | 0.115   | IPR000407 (PFAM); IPR000407 (PANTHER); PTHR11782:SF37 (PANTHER); IPR000407 (PROSITE_PATTERNS)                                                                                                                                                                                                                                                                                                                                                                                                                                                   |
| 1654 | c56053_g1_i1_len_1800_path_1824_0_1799_0                      | 45   | t-lymphocyte activation antigen cd86-like                | 600 | 1.29E-115 | 84.90% | 0.104   | IPR013106 (SMART); IPR003598 (SMART); IPR003599 (SMART); PF13895 (PFAM); IPR013106 (PFAM); IPR013783 (G3DSA:2.60.40.GENE3D); PTHR23279 (PANTHER); PTHR23279:SF1 (PANTHER); TRANSMEMBRANE (PHOBIUS); CYTOPLASMIC_DOMAIN (PHOBIUS); NON_CYTOPLASMIC_DOMAIN (PHOBIUS); IPR007110 (PROSITE_PROFILES); IPR007110 (PROSITE_PROFILES); SSF48726 (SUPERFAMILY); SSF48726 (SUPERFAMILY); TMhelix (TMHMM); TMhelix (TMHMM)                                                                                                                                |

|      |                                                 |      |                                      |     |           |        |         |                                                                                                                                                                                                                                                                                                                                                                                                                                                                                                                                       |
|------|-------------------------------------------------|------|--------------------------------------|-----|-----------|--------|---------|---------------------------------------------------------------------------------------------------------------------------------------------------------------------------------------------------------------------------------------------------------------------------------------------------------------------------------------------------------------------------------------------------------------------------------------------------------------------------------------------------------------------------------------|
| 1655 | c56076_g1_i1_len_1783_path_1761_0_1782_3        | 6690 | cathepsin b                          | 590 | 7.38E-164 | 78.80% | 0.118   | IPR000668 (PRINTS); IPR000668 (SMART); IPR012599 (PFAM); IPR000668 (PFAM); G3DSA:3.90.70.10 (GENE3D); IPR013128 (PANTHER); IPR015643 (PTHR12411:PANTHER); IPR025660 (PROSITE_PATTERNS); IPR025661 (PROSITE_PATTERNS); IPR000169 (PROSITE_PATTERNS); TRANSMEMBRANE (PHOBIUS); CYTOPLASMIC_DOMAIN (PHOBIUS); NON_CYTOPLASMIC_DOMAIN (PHOBIUS); CYTOPLASMIC_DOMAIN (PHOBIUS); TRANSMEMBRANE (PHOBIUS); SSF54001 (SUPERFAMILY); TMhelix (TMHMM)                                                                                           |
| 1656 | c56120_g1_i1_len_2244_path_2222_0_2243_2        | 8392 | protein disulfide-isomerase a3       | 740 | 0         | 78.60% | 0.183   | PR00421 (PRINTS); IPR012336 (G3DSA:3.40.30.GENE3D); IPR012336 (G3DSA:3.40.30.GENE3D); IPR005792 (TIGRFAM); IPR013766 (PFAM); PF13848 (PFAM); IPR005788 (TIGRFAM); IPR012336 (G3DSA:3.40.30.GENE3D); PTHR18929:SF60 (PANTHER); PTHR18929 (PANTHER); IPR017937 (PROSITE_PATTERNS); IPR017937 (PROSITE_PATTERNS); IPR012336 (PROSITE_PROFILES); IPR012336 (PROSITE_PROFILES); IPR012336 (SUPERFAMILY); IPR012336 (SUPERFAMILY); IPR012336 (SUPERFAMILY); IPR012336 (SUPERFAMILY)                                                         |
| 1657 | c56260_g1_i1_len_643_path_1_0_642_0             | 3    | partial                              | 215 | 2.23E-32  | 83.40% | 0.101   | IPR011614 (PFAM); IPR011614 (G3DSA:2.40.180.GENE3D); IPR018028 (PANTHER); CYTOPLASMIC_DOMAIN (PHOBIUS); TRANSMEMBRANE (PHOBIUS); NON_CYTOPLASMIC_DOMAIN (PHOBIUS); IPR018028 (PROSITE_PROFILES); IPR020835 (SUPERFAMILY)                                                                                                                                                                                                                                                                                                              |
| 1658 | c56449_g1_i1_len_861_path_1_0_860_1             | 8    | urokinase-type plasminogen activator | 287 | 1.78E-29  | 63.90% | 0.133   | IPR001254 (SMART); G3DSA:2.40.10.10 (GENE3D); IPR001254 (PFAM); PTHR24265 (PANTHER); IPR018114 (PROSITE_PATTERNS); TRANSMEMBRANE (PHOBIUS); NON_CYTOPLASMIC_DOMAIN (PHOBIUS); CYTOPLASMIC_DOMAIN (PHOBIUS); IPR001254 (PROSITE_PROFILES); IPR009003 (SUPERFAMILY); TMhelix (TMHMM)                                                                                                                                                                                                                                                    |
| 1659 | c5651_g1_i1_len_495_path_1_0_125_127_126_4_94_4 | 19   | zinc finger protein 227              | 159 | 7.34E-41  | 73.00% | 0.107   | IPR015880 (SMART); IPR013087 (G3DSA:3.30.160.GENE3D); IPR013087 (G3DSA:3.30.160.GENE3D); PF13465 (PFAM); IPR013087 (G3DSA:3.30.160.GENE3D); PTHR24409 (PANTHER); IPR007087 (PROSITE_PATTERNS); IPR007087 (PROSITE_PATTERNS); IPR007087 (PROSITE_PATTERNS); TRANSMEMBRANE (PHOBIUS); NON_CYTOPLASMIC_DOMAIN (PHOBIUS); CYTOPLASMIC_DOMAIN (PHOBIUS); IPR007087 (PROSITE_PROFILES); IPR007087 (PROSITE_PROFILES); IPR007087 (PROSITE_PROFILES); SSF57667 (SUPERFAMILY); SSF57667 (SUPERFAMILY); SSF57667 (SUPERFAMILY); TMhelix (TMHMM) |
| 1660 | c56573_g1_i1_len_745_path_1_0_744_1             | 17   | transcription factor e4f1-like       | 248 | 6.15E-17  | 75.90% | 0.103   | IPR015880 (SMART); PF13465 (PFAM); IPR013087 (G3DSA:3.30.160.GENE3D); IPR013087 (G3DSA:3.30.160.GENE3D); PTHR24409 (PANTHER); IPR007087 (PROSITE_PATTERNS); IPR007087 (PROSITE_PATTERNS); IPR007087 (PROSITE_PROFILES); IPR007087 (PROSITE_PROFILES); SSF57667 (SUPERFAMILY)                                                                                                                                                                                                                                                          |
| 1661 | c56682_g1_i1_len_280_path_258_0_279_2           | 2    | lipase 3                             | 93  | 5.58E-24  | 70.00% | 0.168   | IPR029058 (G3DSA:3.40.50.GENE3D); PTHR11005:SF6 (PANTHER); PTHR11005 (PANTHER); IPR029058 (SUPERFAMILY)                                                                                                                                                                                                                                                                                                                                                                                                                               |
| 1662 | c5675_g1_i1_len_1109_path_1216_0_1108_4         | 40   | chitotriosidase-1 isoform x1         | 362 | 8.47E-30  | 52.30% | 0.106   | IPR002557 (SMART); IPR001223 (PFAM); IPR013781 (G3DSA:3.20.20.GENE3D); IPR002557 (PFAM); IPR002557 (G3DSA:2.170.140.GENE3D); PTHR11177 (PANTHER); PTHR11177:SF112 (PANTHER); TRANSMEMBRANE (PHOBIUS); CYTOPLASMIC_DOMAIN (PHOBIUS); CYTOPLASMIC_DOMAIN (PHOBIUS); NON_CYTOPLASMIC_DOMAIN (PHOBIUS); TRANSMEMBRANE (PHOBIUS); IPR002557 (PROSITE_PROFILES); IPR017853 (SUPERFAMILY); IPR002557 (SUPERFAMILY); TMhelix (TMHMM); TMhelix (TMHMM)                                                                                         |
| 1663 | c56859_g1_i1_len_901_path_879_0_900_5           | 465  | ecdysteroid-regulated 16 kda protein | 294 | 1.42E-17  | 54.20% | 0.393 Y | IPR003172 (SMART); IPR003172 (G3DSA:2.60.40.GENE3D); IPR003172 (PFAM); PTHR11306 (PANTHER); IPR014756 (SUPERFAMILY)                                                                                                                                                                                                                                                                                                                                                                                                                   |
| 1664 | c56929_g1_i1_len_789_path_767_0_788_2           | 5    | ankyrin repeat-containing protein    | 263 | 7.53E-13  | 60.90% | 0.1     | IPR002110 (SMART); IPR020683 (PFAM); IPR020683 (G3DSA:1.25.40.GENE3D); PTHR24198 (PANTHER); IPR002110 (PROSITE_PROFILES); IPR020683 (PROSITE_PROFILES); IPR002110 (PROSITE_PROFILES); IPR020683 (SUPERFAMILY)                                                                                                                                                                                                                                                                                                                         |



|      |                                          |     |                                                          |     |           |        |         |                                                                                                                                                                                                                                                                                                                                                                                                                                                                                                                                                                                                                        |
|------|------------------------------------------|-----|----------------------------------------------------------|-----|-----------|--------|---------|------------------------------------------------------------------------------------------------------------------------------------------------------------------------------------------------------------------------------------------------------------------------------------------------------------------------------------------------------------------------------------------------------------------------------------------------------------------------------------------------------------------------------------------------------------------------------------------------------------------------|
| 1665 | c57239_g1_i1_len_1070_path_1048_0_1069_1 | 15  | dnaj homolog dnj-5                                       | 350 | 2.74E-135 | 70.70% | 0.833 Y | IPR001623 (PRINTS); IPR001623 (SMART); IPR001623 (G3DSA:1.10.287.GENE3D); IPR001623 (PFAM); PF14901 (PFAM); PTHR24078 (PANTHER); PTHR24078:SF141 (PANTHER); SIGNAL_PEPTIDE (PHOBIUS); SIGNAL_PEPTIDE_C_REGION (PHOBIUS); SIGNAL_PEPTIDE_H_REGION (PHOBIUS); SIGNAL_PEPTIDE_N_REGION (PHOBIUS); NON_CYTOPLASMIC_DOMAIN (PHOBIUS); IPR001623 (PROSITE_PROFILES); SignalP-noTM (SIGNALP_EUK); IPR001623 (SUPERFAMILY)                                                                                                                                                                                                     |
| 1666 | c57255_g1_i1_len_645_path_1_0_644_5      | 6   | peptidyl-glycine alpha-amidating monooxygenase partial   | 215 | 3.53E-67  | 63.40% | 0.12    | IPR000720 (PRINTS); PF03712 (PFAM); IPR000323 (G3DSA:2.60.120.GENE3D); IPR014784 (G3DSA:2.60.120.GENE3D); PTHR10680:SF13 (PANTHER); PTHR10680 (PANTHER); IPR014783 (PROSITE_PATTERNS); IPR008977 (SUPERFAMILY); IPR008977 (SUPERFAMILY)                                                                                                                                                                                                                                                                                                                                                                                |
| 1667 | c57265_g1_i1_len_791_path_1_0_790_5      | 6   | outer membrane autotransporter barrel domain protein     | 263 | 0         | 98.00% | 0.104   | IPR012332 (G3DSA:2.160.20.GENE3D); IPR006315 (TIGRFAM); IPR005546 (G3DSA:2.40.128.GENE3D); IPR004899 (PFAM); IPR005546 (PFAM); PTHR12338 (PANTHER); IPR005546 (PROSITE_PROFILES); IPR011050 (SUPERFAMILY); IPR005546 (SUPERFAMILY)                                                                                                                                                                                                                                                                                                                                                                                     |
| 1668 | c5739_g1_i1_len_2003_path_2011_0_2002_5  | 236 | glucose-6-phosphate isomerase                            | 667 | 0         | 87.70% | 0.103   | IPR001672 (PRINTS); IPR023096 (G3DSA:1.10.1390.GENE3D); IPR001672 (PFAM); G3DSA:3.40.50.10490 (GENE3D); IPR001672 (PANTHER); PTHR11469:SF4 (PANTHER); IPR018189 (PROSITE_PATTERNS); IPR018189 (PROSITE_PATTERNS); TRANSMEMBRANE (PHOBIUS); NON_CYTOPLASMIC_DOMAIN (PHOBIUS); CYTOPLASMIC_DOMAIN (PHOBIUS); IPR001672 (PROSITE_PROFILES); IPR001672 (HAMAP); SSF53697 (SUPERFAMILY)                                                                                                                                                                                                                                     |
| 1669 | c57455_g1_i1_len_1465_path_1_0_1464_3    | 18  | upf0364 protein partial                                  | 489 | 1.80E-113 | 61.00% | 0.101   | Coil (COILS); IPR002791 (PFAM); PTHR12260:SF1 (PANTHER); PTHR12260 (PANTHER); IPR002791 (SUPERFAMILY)                                                                                                                                                                                                                                                                                                                                                                                                                                                                                                                  |
| 1670 | c57509_g1_i1_len_754_path_1_0_753_0      | 8   | beta-lactamase                                           | 252 | 0         | 99.70% | 0.635 Y | IPR012338 (G3DSA:3.40.710.GENE3D); IPR001466 (PFAM); PTHR22935 (PANTHER); PTHR22935:SF58 (PANTHER); IPR001586 (PROSITE_PATTERNS); SIGNAL_PEPTIDE (PHOBIUS); SIGNAL_PEPTIDE_N_REGION (PHOBIUS); SIGNAL_PEPTIDE_C_REGION (PHOBIUS); NON_CYTOPLASMIC_DOMAIN (PHOBIUS); SIGNAL_PEPTIDE_H_REGION (PHOBIUS); SignalP-noTM (SIGNALP_GRAM_NEGATIVE); SignalP-noTM (SIGNALP_EUK); IPR012338 (SUPERFAMILY)                                                                                                                                                                                                                       |
| 1671 | c57516_g1_i1_len_1883_path_1861_0_1882_2 | 60  | wd repeat-containing protein 37                          | 627 | 0         | 76.80% | 0.12    | IPR020472 (PRINTS); IPR001680 (SMART); IPR015943 (G3DSA:2.130.10.GENE3D); IPR001680 (PFAM); IPR015943 (G3DSA:2.130.10.GENE3D); PTHR19855:SF12 (PANTHER); PTHR19855 (PANTHER); IPR019775 (PROSITE_PATTERNS); IPR001680 (PROSITE_PROFILES); IPR001680 (PROSITE_PROFILES); IPR001680 (PROSITE_PROFILES); IPR017986 (PROSITE_PROFILES); IPR001680 (PROSITE_PROFILES); IPR017986 (SUPERFAMILY)                                                                                                                                                                                                                              |
| 1672 | c57680_g1_i1_len_715_path_1_0_714_1      | 14  | adenosine monophosphate-protein transferase ficd homolog | 238 | 9.11E-123 | 83.90% | 0.105   | IPR003812 (PFAM); IPR003812 (G3DSA:1.10.3290.GENE3D); PTHR13504:SF12 (PANTHER); PTHR13504 (PANTHER); IPR003812 (PROSITE_PROFILES); IPR003812 (SUPERFAMILY)                                                                                                                                                                                                                                                                                                                                                                                                                                                             |
| 1673 | c57713_g1_i1_len_1166_path_1_0_1165_5    | 33  | adp-ribosylation factor-like protein 3                   | 380 | 1.74E-109 | 93.90% | 0.558 Y | IPR006689 (PRINTS); IPR024156 (SMART); IPR003579 (SMART); IPR006687 (SMART); IPR027417 (G3DSA:3.40.50.GENE3D); IPR005225 (TIGRFAM); IPR006689 (PFAM); PTHR11711 (PANTHER); PTHR11711:SF124 (PANTHER); TRANSMEMBRANE (PHOBIUS); CYTOPLASMIC_DOMAIN (PHOBIUS); NON_CYTOPLASMIC_DOMAIN (PHOBIUS); NON_CYTOPLASMIC_DOMAIN (PHOBIUS); TRANSMEMBRANE (PHOBIUS); IPR024156 (PROSITE_PROFILES); SignalP-noTM (SIGNALP_EUK); IPR027417 (SUPERFAMILY); TMhelix (TMHMM)                                                                                                                                                           |
| 1674 | c57754_g1_i1_len_1807_path_1785_0_1806_1 | 50  | tripartite motif-containing protein 2-like isoform x5    | 602 | 9.84E-155 | 85.60% | 0.116   | IPR001258 (PFAM); IPR011042 (G3DSA:2.120.10.GENE3D); PTHR24103 (PANTHER); PTHR24103:SF1 (PANTHER); NON_CYTOPLASMIC_DOMAIN (PHOBIUS); CYTOPLASMIC_DOMAIN (PHOBIUS); CYTOPLASMIC_DOMAIN (PHOBIUS); TRANSMEMBRANE (PHOBIUS); TRANSMEMBRANE (PHOBIUS); CYTOPLASMIC_DOMAIN (PHOBIUS); NON_CYTOPLASMIC_DOMAIN (PHOBIUS); NON_CYTOPLASMIC_DOMAIN (PHOBIUS); TRANSMEMBRANE (PHOBIUS); TRANSMEMBRANE (PHOBIUS); IPR013017 (PROSITE_PROFILES); IPR013017 (PROSITE_PROFILES); IPR013017 (PROSITE_PROFILES); IPR013017 (PROSITE_PROFILES); IPR013017 (PROSITE_PROFILES); SSF101898 (SUPERFAMILY); TMhelix (TMHMM); TMhelix (TMHMM) |

|      |                                                      |     |                                                               |     |           |         |         |                                                                                                                                                                                                                                                                                                                                                                                                                           |
|------|------------------------------------------------------|-----|---------------------------------------------------------------|-----|-----------|---------|---------|---------------------------------------------------------------------------------------------------------------------------------------------------------------------------------------------------------------------------------------------------------------------------------------------------------------------------------------------------------------------------------------------------------------------------|
| 1675 | c5785_g1_i1_len_1008_path_986_0_1007_1               | 11  | hypoxanthine partial                                          | 336 | 2.74E-147 | 100.00% | 0.146   | IPR008274 (PFAM); IPR008274 (G3DSA:3.30.365.GENE3D); IPR008274 (G3DSA:3.30.365.GENE3D); PTHR11908:SF64 (PANTHER); PTHR11908 (PANTHER); IPR008274 (SUPERFAMILY)                                                                                                                                                                                                                                                            |
| 1676 | c57872_g1_i1_len_1484_path_1_0_1483_1                | 63  | dipeptidyl peptidase 9                                        | 488 | 0         | 81.40%  | 0.126   | IPR029058 (G3DSA:3.40.50.GENE3D); IPR002469 (G3DSA:2.140.10.GENE3D); IPR001375 (PFAM); IPR002469 (PFAM); PTHR11731:SF110 (PANTHER); PTHR11731 (PANTHER); NON_CYTOPLASMIC_DOMAIN (PHOBIUS); TRANSMEMBRANE (PHOBIUS); CYTOPLASMIC_DOMAIN (PHOBIUS); SSF82171 (SUPERFAMILY); IPR029058 (SUPERFAMILY)                                                                                                                         |
| 1677 | c57873_g1_i1_len_1128_path_1_0_1127_4                | 12  | thioredoxin                                                   | 376 | 6.21E-97  | 96.90%  | 0.183   | PR00421 (PRINTS); IPR005746 (TIGRFAM); IPR013766 (PFAM); IPR012336 (G3DSA:3.40.30.GENE3D); IPR005746 (PANTHER); IPR017937 (PROSITE_PATTERNS); IPR012336 (PROSITE_PROFILES); IPR012336 (SUPERFAMILY)                                                                                                                                                                                                                       |
| 1678 | c57916_g1_i1_len_2466_path_1_0_2465_2                | 78  | eukaryotic translation initiation factor 2-alpha kinase 3     | 822 | 2.02E-112 | 52.50%  | 0.173   | IPR002290 (SMART); G3DSA:1.10.510.10 (GENE3D); G3DSA:3.30.200.20 (GENE3D); IPR000719 (PFAM); PTHR11042:SF86 (PANTHER); PTHR11042 (PANTHER); IPR017441 (PROSITE_PATTERNS); IPR008271 (PROSITE_PATTERNS); CYTOPLASMIC_DOMAIN (PHOBIUS); NON_CYTOPLASMIC_DOMAIN (PHOBIUS); TRANSMEMBRANE (PHOBIUS); IPR000719 (PROSITE_PROFILES); IPR011009 (SUPERFAMILY); TMhelix (TMHMM)                                                   |
| 1679 | c5799_g1_i1_len_1329_path_1307_0_949_2257_950_1328_1 | 26  | myosin-binding protein fast-type-like                         | 443 | 3.18E-38  | 57.60%  | 0.099   | IPR003599 (SMART); IPR003598 (SMART); IPR013098 (PFAM); IPR013783 (G3DSA:2.60.40.GENE3D); IPR020675 (PANTHER); IPR007110 (PROSITE_PROFILES); SSF48726 (SUPERFAMILY)                                                                                                                                                                                                                                                       |
| 1680 | c57991_g1_i1_len_1416_path_1_0_1415_0                | 67  | lachesin                                                      | 472 | 9.18E-88  | 66.30%  | 0.124   | IPR003598 (SMART); IPR003599 (SMART); IPR013783 (G3DSA:2.60.40.GENE3D); IPR013098 (PFAM); IPR013783 (G3DSA:2.60.40.GENE3D); PTHR19831 (PANTHER); PTHR19831:SF43 (PANTHER); IPR007110 (PROSITE_PROFILES); IPR007110 (PROSITE_PROFILES); IPR007110 (PROSITE_PROFILES); SSF48726 (SUPERFAMILY); SSF48726 (SUPERFAMILY); SSF48726 (SUPERFAMILY)                                                                               |
| 1681 | c58054_g1_i1_len_622_path_600_0_621_5                | 5   | peptidyl-prolyl cis-trans rhodopsin-specific isozyme          | 207 | 4.93E-79  | 75.90%  | 0.101   | IPR002130 (PRINTS); IPR002130 (PFAM); IPR024936 (PIRSF); IPR029000 (G3DSA:2.40.100.GENE3D); IPR024936 (PANTHER); PTHR11071:SF11 (PANTHER); IPR020892 (PROSITE_PATTERNS); IPR002130 (PROSITE_PROFILES); IPR029000 (SUPERFAMILY)                                                                                                                                                                                            |
| 1682 | c5817_g1_i1_len_971_path_1204_0_730_246_731_970_1    | 31  | reticulon nogo                                                | 319 | 3.43E-58  | 63.80%  | 0.720 Y | IPR003591 (SMART); IPR001611 (PFAM); IPR001611 (PFAM); G3DSA:3.80.10.10 (GENE3D); PTHR24367 (PANTHER); SIGNAL_PEPTIDE_N_REGION (PHOBIUS); SIGNAL_PEPTIDE_C_REGION (PHOBIUS); SIGNAL_PEPTIDE (PHOBIUS); SIGNAL_PEPTIDE_H_REGION (PHOBIUS); NON_CYTOPLASMIC_DOMAIN (PHOBIUS); SignalP-noTM (SIGNALP_GRAM_NEGATIVE); SignalP-noTM (SIGNALP_EUK); SignalP-TM (SIGNALP_GRAM_POSITIVE); SSF52058 (SUPERFAMILY)                  |
| 1683 | c58207_g1_i1_len_348_path_326_0_347_3                | 1   | upf0378 protein kiaa0100-like                                 | 116 | 3.82E-48  | 83.50%  | 0.107   | IPR019443 (PFAM); PTHR15678 (PANTHER); PTHR15678:SF6 (PANTHER)                                                                                                                                                                                                                                                                                                                                                            |
| 1684 | c58241_g1_i1_len_216_path_194_0_215_5                | 0   | protein                                                       | 72  | 3.35E-31  | 80.30%  | 0.113   | no IPS match                                                                                                                                                                                                                                                                                                                                                                                                              |
| 1685 | c58254_g1_i1_len_2695_path_2713_0_2694_0             | 120 | kr domain protein                                             | 899 | 6.34E-148 | 99.00%  | 0.113   | IPR002198 (PRINTS); IPR002347 (PRINTS); IPR016040 (G3DSA:3.40.50.GENE3D); IPR002198 (PFAM); PTHR24322 (PANTHER); PTHR24322:SF265 (PANTHER); IPR020904 (PROSITE_PATTERNS); SSF51735 (SUPERFAMILY)                                                                                                                                                                                                                          |
| 1686 | c58419_g1_i1_len_1419_path_1_0_1418_5                | 30  | mam and ldl-receptor class a domain-containing protein 2-like | 468 | 2.26E-12  | 57.20%  | 0.138   | IPR002172 (SMART); G3DSA:4.10.1220.10 (GENE3D); IPR023415 (PROSITE_PATTERNS); TRANSMEMBRANE (PHOBIUS); NON_CYTOPLASMIC_DOMAIN (PHOBIUS); TRANSMEMBRANE (PHOBIUS); CYTOPLASMIC_DOMAIN (PHOBIUS); NON_CYTOPLASMIC_DOMAIN (PHOBIUS); IPR002172 (SUPERFAMILY); TMhelix (TMHMM); TMhelix (TMHMM)                                                                                                                               |
| 1687 | c5848_g1_i1_len_1037_path_1_0_1036_5                 | 19  | mam and ldl-receptor class a domain-containing protein 1      | 345 | 6.45E-21  | 48.80%  | 0.183   | IPR002172 (PRINTS); IPR002172 (SMART); IPR002172 (G3DSA:4.10.400.GENE3D); G3DSA:2.10.25.10 (GENE3D); IPR002172 (G3DSA:4.10.400.GENE3D); IPR013032 (PROSITE_PATTERNS); CYTOPLASMIC_DOMAIN (PHOBIUS); TRANSMEMBRANE (PHOBIUS); NON_CYTOPLASMIC_DOMAIN (PHOBIUS); IPR002172 (PROSITE_PROFILES); IPR002172 (PROSITE_PROFILES); IPR000742 (PROSITE_PROFILES); IPR002172 (SUPERFAMILY); SSF57196 (SUPERFAMILY); TMhelix (TMHMM) |

|      |                                                                     |     |                                                                                                                                                                                                                                                                                                                                                                                                                                                                                                                                             |     |           |        |         |                                                                                                                                                                                                                                                                                                                                                                                                                                                                                                                                                     |
|------|---------------------------------------------------------------------|-----|---------------------------------------------------------------------------------------------------------------------------------------------------------------------------------------------------------------------------------------------------------------------------------------------------------------------------------------------------------------------------------------------------------------------------------------------------------------------------------------------------------------------------------------------|-----|-----------|--------|---------|-----------------------------------------------------------------------------------------------------------------------------------------------------------------------------------------------------------------------------------------------------------------------------------------------------------------------------------------------------------------------------------------------------------------------------------------------------------------------------------------------------------------------------------------------------|
| 1688 | c5848_g2_i1_len_321_path_2029_0_320_4                               | 2   | mam and ldl-receptor class a domain-containing protein 1                                                                                                                                                                                                                                                                                                                                                                                                                                                                                    | 107 | 2.83E-14  | 61.40% | 0.104   | IPR002172 (SMART); IPR000998 (PFAM); IPR002172 (G3DSA:4.10.400.GENE3D); IPR002172 (PFAM); PTHR23282 (PANTHER); IPR023415 (PROSITE_PATTERNS); IPR002172 (PROSITE_PROFILES); IPR000998 (PROSITE_PROFILES); IPR002172 (SUPERFAMILY)                                                                                                                                                                                                                                                                                                                    |
| 1689 | c5859_g1_i1_len_1917_path_1_0_1916_1                                | 113 | cyclin-dependent kinase 9-like                                                                                                                                                                                                                                                                                                                                                                                                                                                                                                              | 639 | 0         | 93.40% | 0.109   | IPR002290 (SMART); IPR000719 (PFAM); G3DSA:1.10.510.10 (GENE3D); G3DSA:3.30.200.20 (GENE3D); PTHR24056:SF158 (PANTHER); PTHR24056 (PANTHER); IPR008271 (PROSITE_PATTERNS); TRANSMEMBRANE (PHOBIUS); NON_CYTOPLASMIC_DOMAIN (PHOBIUS); TRANSMEMBRANE (PHOBIUS); CYTOPLASMIC_DOMAIN (PHOBIUS); NON_CYTOPLASMIC_DOMAIN (PHOBIUS); IPR000719 (PROSITE_PROFILES); IPR011009 (SUPERFAMILY); TMhelix (TMHMM); TMhelix (TMHMM)                                                                                                                              |
| 1690 | c5862_g1_i1_len_1345_path_1_0_1344_2                                | 76  | bone morphogenetic protein 4                                                                                                                                                                                                                                                                                                                                                                                                                                                                                                                | 448 | 7.47E-14  | 45.60% | 0.118   | Coil (COILS); IPR001111 (PFAM); IPR015615 (PANTHER); NON_CYTOPLASMIC_DOMAIN (PHOBIUS); CYTOPLASMIC_DOMAIN (PHOBIUS); TRANSMEMBRANE (PHOBIUS)                                                                                                                                                                                                                                                                                                                                                                                                        |
| 1691 | c58782_g1_i1_len_1725_path_1_0_1724_4                               | 41  | basement membrane-specific heparan sulfate proteoglycan core isoform x2                                                                                                                                                                                                                                                                                                                                                                                                                                                                     | 575 | 1.38E-103 | 75.40% | 0.119   | IPR003598 (SMART); IPR013106 (SMART); IPR003599 (SMART); PF13895 (PFAM); IPR013106 (PFAM); IPR013783 (G3DSA:2.60.40.GENE3D); PTHR23279 (PANTHER); NON_CYTOPLASMIC_DOMAIN (PHOBIUS); TRANSMEMBRANE (PHOBIUS); TRANSMEMBRANE (PHOBIUS); TRANSMEMBRANE (PHOBIUS); CYTOPLASMIC_DOMAIN (PHOBIUS); NON_CYTOPLASMIC_DOMAIN (PHOBIUS); NON_CYTOPLASMIC_DOMAIN (PHOBIUS); TRANSMEMBRANE (PHOBIUS); CYTOPLASMIC_DOMAIN (PHOBIUS); IPR007110 (PROSITE_PROFILES); IPR007110 (PROSITE_PROFILES); SSF48726 (SUPERFAMILY); SSF48726 (SUPERFAMILY); TMhelix (TMHMM) |
| 1692 | c58907_g1_i1_len_1495_path_1473_0_1494_3                            | 51  | heat-shock protein 105                                                                                                                                                                                                                                                                                                                                                                                                                                                                                                                      | 499 | 0         | 77.80% | 0.105   | IPR013126 (PRINTS); G3DSA:3.90.640.10 (GENE3D); G3DSA:3.30.420.40 (GENE3D); G3DSA:3.30.420.40 (GENE3D); IPR013126 (PFAM); IPR029047 (G3DSA:2.60.34.GENE3D); PTHR19375:SF78 (PANTHER); PTHR19375 (PANTHER); IPR018181 (PROSITE_PATTERNS); SSF53067 (SUPERFAMILY); IPR029047 (SUPERFAMILY); SSF53067 (SUPERFAMILY)                                                                                                                                                                                                                                    |
| 1693 | c58993_g1_i1_len_1635_path_1_0_1634_2                               | 87  | carbohydrate sulfotransferase 11-like                                                                                                                                                                                                                                                                                                                                                                                                                                                                                                       | 539 | 1.54E-66  | 55.10% | 0.642 Y | IPR005331 (PFAM); IPR018011 (PANTHER); SIGNAL_PEPTIDE_N_REGION (PHOBIUS); NON_CYTOPLASMIC_DOMAIN (PHOBIUS); SIGNAL_PEPTIDE_H_REGION (PHOBIUS); SIGNAL_PEPTIDE_C_REGION (PHOBIUS); SIGNAL_PEPTIDE (PHOBIUS); SignalP-noTM (SIGNALP_EUK)                                                                                                                                                                                                                                                                                                              |
| 1694 | c5914_g2_i1_len_884_path_3561_0_408_1350_4_09_883_0                 | 16  | serine threonine-protein kinase mark2-like isoform x10                                                                                                                                                                                                                                                                                                                                                                                                                                                                                      | 289 | 5.94E-48  | 78.60% | 0.145   | G3DSA:3.30.200.20 (GENE3D); IPR000719 (PFAM); PTHR24346 (PANTHER); PTHR24346:SF23 (PANTHER); IPR017441 (PROSITE_PATTERNS); IPR000719 (PROSITE_PROFILES); IPR011009 (SUPERFAMILY)                                                                                                                                                                                                                                                                                                                                                                    |
| 1695 | c5914_g2_i2_len_1196_path_629_0_720_1350_7_21_1195_0                | 18  | serine threonine-protein kinase mark2-like isoform x10                                                                                                                                                                                                                                                                                                                                                                                                                                                                                      | 393 | 2.85E-36  | 90.00% | 0.239   | G3DSA:3.30.200.20 (GENE3D); IPR000719 (PFAM); PTHR24346:SF23 (PANTHER); PTHR24346 (PANTHER); IPR017441 (PROSITE_PATTERNS); IPR000719 (PROSITE_PROFILES); IPR011009 (SUPERFAMILY)                                                                                                                                                                                                                                                                                                                                                                    |
| 1696 | c5931_g1_i1_len_2473_path_4_0_1805_1810_18_06_1807_1812_1808_2472_2 | 76  | ectonucleoside triphosphate diphosphohydrolase 2-like isoform x4                                                                                                                                                                                                                                                                                                                                                                                                                                                                            | 824 | 6.96E-105 | 54.40% | 0.447 Y | IPR000407 (PFAM); IPR000407 (PANTHER); IPR000407 (PROSITE_PATTERNS); TRANSMEMBRANE (PHOBIUS); NON_CYTOPLASMIC_DOMAIN (PHOBIUS); TRANSMEMBRANE (PHOBIUS); NON_CYTOPLASMIC_DOMAIN (PHOBIUS); TRANSMEMBRANE (PHOBIUS); NON_CYTOPLASMIC_DOMAIN (PHOBIUS); CYTOPLASMIC_DOMAIN (PHOBIUS); CYTOPLASMIC_DOMAIN (PHOBIUS); TRANSMEMBRANE (PHOBIUS); TMhelix (TMHMM); TMhelix (TMHMM); TMhelix (TMHMM)                                                                                                                                                        |
| 1697 | c59326_g1_i1_len_1565_path_1_0_1564_0                               | 35  | nucleolar protein 58-like                                                                                                                                                                                                                                                                                                                                                                                                                                                                                                                   | 522 | 0         | 82.80% | 0.114   | IPR012976 (SMART); IPR012974 (PFAM); IPR002687 (PFAM); IPR012976 (PFAM); PTHR10894 (PANTHER); CYTOPLASMIC_DOMAIN (PHOBIUS); NON_CYTOPLASMIC_DOMAIN (PHOBIUS); TRANSMEMBRANE (PHOBIUS); IPR002687 (PROSITE_PROFILES); SSF89124 (SUPERFAMILY); TMhelix (TMHMM)                                                                                                                                                                                                                                                                                        |
| 1698 | c59468_g1_i1_len_1776_path_1_0_1775_3                               | 53  | fmrf_musdo ame: full=fmrfamide neuropeptides contains: ame: full= amide-2 contains: ame: full= amide-3 contains: ame: full= amide-4 contains: ame: full= amide-5 contains: ame: full= amide-6 contains: ame: full= amide-7 contains: ame: full= amide-8 ame: full= amide-10 contains: ame: full= amide-9 ame: full= amide-11 ame: full= amide-12 ame: full= amide-13 contains: ame: full= amide-14 contains: ame: full= amide-15 contains: ame: full= amide-17 contains: ame: full= amide-16 contains: ame: full= amide-18 flags: precursor | 592 | 1.31E-19  | 58.60% | 0.609 Y | IPR002544 (PFAM); PTHR20986:SF1 (PANTHER); PTHR20986 (PANTHER); SIGNAL_PEPTIDE_C_REGION (PHOBIUS); SIGNAL_PEPTIDE_N_REGION (PHOBIUS); SIGNAL_PEPTIDE_H_REGION (PHOBIUS); TRANSMEMBRANE (PHOBIUS); NON_CYTOPLASMIC_DOMAIN (PHOBIUS); SIGNAL_PEPTIDE (PHOBIUS); NON_CYTOPLASMIC_DOMAIN (PHOBIUS); CYTOPLASMIC_DOMAIN (PHOBIUS); TRANSMEMBRANE (PHOBIUS); SignalP-noTM (SIGNALP_EUK)                                                                                                                                                                   |

|      |                                          |     |                                            |     |           |        |         |                                                                                                                                                                                                                                                                                                                                                                                                                                                                                                                                                                                                                                                                                                                                                                                                                                                                                                                                 |
|------|------------------------------------------|-----|--------------------------------------------|-----|-----------|--------|---------|---------------------------------------------------------------------------------------------------------------------------------------------------------------------------------------------------------------------------------------------------------------------------------------------------------------------------------------------------------------------------------------------------------------------------------------------------------------------------------------------------------------------------------------------------------------------------------------------------------------------------------------------------------------------------------------------------------------------------------------------------------------------------------------------------------------------------------------------------------------------------------------------------------------------------------|
| 1699 | c59567_g1_i1_len_1396_path_1_0_1395_2    | 17  | early growth response                      | 465 | 1.14E-113 | 55.80% | 0.113   | IPR015880 (SMART); PF13465 (PFAM); IPR013087 (G3DSA:3.30.160.GENE3D); IPR013087 (G3DSA:3.30.160.GENE3D); IPR013087 (G3DSA:3.30.160.GENE3D); PTHR10042 (PANTHER); PTHR10042:SF24 (PANTHER); IPR007087 (PROSITE_PATTERNS); IPR007087 (PROSITE_PATTERNS); IPR007087 (PROSITE_PATTERNS); IPR007087 (PROSITE_PROFILES); IPR007087 (PROSITE_PROFILES); IPR007087 (PROSITE_PROFILES); SSF57667 (SUPERFAMILY); SSF57667 (SUPERFAMILY)                                                                                                                                                                                                                                                                                                                                                                                                                                                                                                   |
| 1700 | c59678_g1_i1_len_1479_path_1_0_1478_5    | 18  | carbohydrate sulfotransferase 11-like      | 493 | 3.20E-34  | 50.70% | 0.108   | IPR005331 (PFAM); IPR018011 (PANTHER); PTHR12137:SF33 (PANTHER); TRANSMEMBRANE (PHOBIUS); NON_CYTOPLASMIC_DOMAIN (PHOBIUS); CYTOPLASMIC_DOMAIN (PHOBIUS); NON_CYTOPLASMIC_DOMAIN (PHOBIUS); TRANSMEMBRANE (PHOBIUS)                                                                                                                                                                                                                                                                                                                                                                                                                                                                                                                                                                                                                                                                                                             |
| 1701 | c59868_g1_i1_len_904_path_1_0_903_1      | 8   | melanotransferrin                          | 301 | 8.23E-118 | 79.40% | 0.204   | IPR001156 (PRINTS); IPR001156 (SMART); IPR001156 (PFAM); G3DSA:3.40.190.10 (GENE3D); G3DSA:3.40.190.10 (GENE3D); PTHR11485 (PANTHER); PTHR11485:SF18 (PANTHER); CYTOPLASMIC_DOMAIN (PHOBIUS); NON_CYTOPLASMIC_DOMAIN (PHOBIUS); TRANSMEMBRANE (PHOBIUS); IPR001156 (PROSITE_PROFILES); SSF53850 (SUPERFAMILY)                                                                                                                                                                                                                                                                                                                                                                                                                                                                                                                                                                                                                   |
| 1702 | c59895_g1_i1_len_1570_path_1548_0_1569_3 | 17  | lysyl-trna synthetase                      | 524 | 0         | 99.90% | 0.105   | IPR018149 (PRINTS); G3DSA:3.30.930.10 (GENE3D); IPR004364 (PFAM); IPR004525 (PTHR22594:PANTHER); IPR018150 (PANTHER); IPR006195 (PROSITE_PROFILES); SSF55681 (SUPERFAMILY)                                                                                                                                                                                                                                                                                                                                                                                                                                                                                                                                                                                                                                                                                                                                                      |
| 1703 | c60159_g1_i1_len_1580_path_1558_0_1579_1 | 148 | tropinone reductase 2-like                 | 527 | 6.54E-134 | 83.50% | 0.168   | IPR002198 (PRINTS); IPR002347 (PRINTS); IPR016040 (G3DSA:3.40.50.GENE3D); IPR002198 (PFAM); PTHR24322:SF111 (PANTHER); PTHR24322 (PANTHER); IPR020904 (PROSITE_PATTERNS); CYTOPLASMIC_DOMAIN (PHOBIUS); TRANSMEMBRANE (PHOBIUS); CYTOPLASMIC_DOMAIN (PHOBIUS); TRANSMEMBRANE (PHOBIUS); NON_CYTOPLASMIC_DOMAIN (PHOBIUS); TRANSMEMBRANE (PHOBIUS); TRANSMEMBRANE (PHOBIUS); CYTOPLASMIC_DOMAIN (PHOBIUS); NON_CYTOPLASMIC_DOMAIN (PHOBIUS); NON_CYTOPLASMIC_DOMAIN (PHOBIUS); TRANSMEMBRANE (PHOBIUS); SSF51735 (SUPERFAMILY); TMhelix (TMHMM); TMhelix (TMHMM); TMhelix (TMHMM); TMhelix (TMHMM)                                                                                                                                                                                                                                                                                                                               |
| 1704 | c60227_g1_i1_len_960_path_950_0_959_2    | 33  | wnt1-inducible-signaling pathway protein 3 | 320 | 6.70E-16  | 52.20% | 0.205   | IPR000867 (SMART); IPR000867 (PFAM); PTHR11348 (PANTHER); IPR000867 (PROSITE_PROFILES); IPR009030 (SUPERFAMILY)                                                                                                                                                                                                                                                                                                                                                                                                                                                                                                                                                                                                                                                                                                                                                                                                                 |
| 1705 | c60409_g1_i1_len_1355_path_1333_0_1354_0 | 23  | xanthine dehydrogenase partial             | 452 | 0         | 80.90% | 0.113   | IPR008274 (G3DSA:3.30.365.GENE3D); IPR008274 (PFAM); IPR008274 (G3DSA:3.30.365.GENE3D); IPR008274 (G3DSA:3.30.365.GENE3D); IPR008274 (G3DSA:3.30.365.GENE3D); PTHR11908 (PANTHER); PTHR11908:SF32 (PANTHER); IPR008274 (SUPERFAMILY)                                                                                                                                                                                                                                                                                                                                                                                                                                                                                                                                                                                                                                                                                            |
| 1706 | c60432_g1_i1_len_717_path_1_0_716_4      | 7   | neurogenic locus notch                     | 234 | 1.62E-108 | 89.70% | 0.119   | PR00010 (PRINTS); IPR001881 (SMART); IPR000742 (SMART); G3DSA:2.10.25.10 (GENE3D); G3DSA:2.10.25.10 (GENE3D); G3DSA:2.10.25.10 (GENE3D); IPR000742 (PFAM); G3DSA:2.10.25.10 (GENE3D); PTHR24033 (PANTHER); PTHR24033:SF36 (PANTHER); IPR000152 (PROSITE_PATTERNS); IPR018097 (PROSITE_PATTERNS); IPR018097 (PROSITE_PATTERNS); IPR000152 (PROSITE_PATTERNS); IPR013032 (PROSITE_PATTERNS); IPR018097 (PROSITE_PATTERNS); IPR013032 (PROSITE_PATTERNS); IPR013032 (PROSITE_PATTERNS); IPR000152 (PROSITE_PATTERNS); IPR018097 (PROSITE_PATTERNS); IPR013032 (PROSITE_PATTERNS); IPR013032 (PROSITE_PATTERNS); IPR000152 (PROSITE_PATTERNS); IPR000152 (PROSITE_PATTERNS); IPR013032 (PROSITE_PATTERNS); IPR013032 (PROSITE_PATTERNS); PD936484 (PRODOM); IPR000742 (PROSITE_PROFILES); IPR000742 (PROSITE_PROFILES); IPR000742 (PROSITE_PROFILES); IPR000742 (PROSITE_PROFILES); SSF57196 (SUPERFAMILY); IPR009030 (SUPERFAMILY) |
| 1707 | c60441_g1_i1_len_1829_path_1_0_1828_4    | 22  | penicillin-binding protein 1a              | 610 | 0         | 99.00% | 0.384 Y | IPR001264 (PFAM); G3DSA:1.10.3810.10 (GENE3D); IPR011816 (TIGRFAM); IPR012340 (G3DSA:2.40.50.GENE3D); IPR012338 (G3DSA:3.40.710.GENE3D); IPR001460 (PFAM); PTHR32282 (PANTHER); PTHR32282:SF5 (PANTHER); IPR023346 (SUPERFAMILY); IPR012338 (SUPERFAMILY)                                                                                                                                                                                                                                                                                                                                                                                                                                                                                                                                                                                                                                                                       |

[illegible]



|      |                                          |     |                                                 |     |           |        |         |                                                                                                                                                                                                                                                                                                                                                                                                                                                                                                                                                                                                                                        |
|------|------------------------------------------|-----|-------------------------------------------------|-----|-----------|--------|---------|----------------------------------------------------------------------------------------------------------------------------------------------------------------------------------------------------------------------------------------------------------------------------------------------------------------------------------------------------------------------------------------------------------------------------------------------------------------------------------------------------------------------------------------------------------------------------------------------------------------------------------------|
| 1723 | c62315_g1_i1_len_690_path_668_0_689_3    | 4   | tryptophan-specific transport protein           | 230 | 3.17E-121 | 98.80% | 0.447 Y | IPR018227 (PFAM); PTHR32195 (PANTHER); PTHR32195:SF11 (PANTHER); NON_CYTOPLASMIC_DOMAIN (PHOBIUS); TRANSMEMBRANE (PHOBIUS); CYTOPLASMIC_DOMAIN (PHOBIUS); TRANSMEMBRANE (PHOBIUS); NON_CYTOPLASMIC_DOMAIN (PHOBIUS); CYTOPLASMIC_DOMAIN (PHOBIUS); NON_CYTOPLASMIC_DOMAIN (PHOBIUS); TRANSMEMBRANE (PHOBIUS); TRANSMEMBRANE (PHOBIUS); TMhelix (TMHMM); TMhelix (TMHMM); TMhelix (TMHMM)                                                                                                                                                                                                                                               |
| 1724 | c62415_g1_i1_len_861_path_1_0_860_0      | 14  | lipophorin receptor                             | 287 | 2.49E-28  | 71.50% | 0.715 Y | IPR002172 (PRINTS); IPR002172 (SMART); IPR002172 (PFAM); IPR002172 (G3DSA:4.10.400.GENE3D); PTHR10529 (PANTHER); IPR023415 (PROSITE_PATTERNS); IPR023415 (PROSITE_PATTERNS); SIGNAL_PEPTIDE_H_REGION (PHOBIUS); SIGNAL_PEPTIDE_N_REGION (PHOBIUS); NON_CYTOPLASMIC_DOMAIN (PHOBIUS); SIGNAL_PEPTIDE_C_REGION (PHOBIUS); SIGNAL_PEPTIDE (PHOBIUS); IPR002172 (PROSITE_PROFILES); IPR002172 (PROSITE_PROFILES); SignalP-noTM (SIGNALP_EUK); SignalP-TM (SIGNALP_GRAM_POSITIVE); IPR002172 (SUPERFAMILY); IPR002172 (SUPERFAMILY)                                                                                                         |
| 1725 | c62478_g1_i1_len_1617_path_1595_0_1616_3 | 128 | PREDICTED: uncharacterized protein LOC101859571 | 539 | 4.33E-06  | 39.00% | 0.103   | IPR000998 (SMART); IPR000998 (PFAM); TRANSMEMBRANE (PHOBIUS); CYTOPLASMIC_DOMAIN (PHOBIUS); NON_CYTOPLASMIC_DOMAIN (PHOBIUS); IPR000998 (PROSITE_PROFILES); IPR000998 (PROSITE_PROFILES); IPR013320 (SUPERFAMILY); TMhelix (TMHMM)                                                                                                                                                                                                                                                                                                                                                                                                     |
| 1726 | c62549_g1_i1_len_600_path_578_0_599_4    | 5   | sonic hedgehog protein a                        | 200 | 3.53E-40  | 56.60% | 0.108   | IPR001657 (PRINTS); IPR003586 (SMART); IPR028992 (G3DSA:2.170.16.GENE3D); IPR001767 (PFAM); PTHR11889 (PANTHER); IPR028992 (SUPERFAMILY)                                                                                                                                                                                                                                                                                                                                                                                                                                                                                               |
| 1727 | c62819_g1_i1_len_884_path_862_0_883_4    | 16  | low quality protein: zinc finger protein 233    | 295 | 1.61E-32  | 60.80% | 0.099   | IPR015880 (SMART); IPR013087 (G3DSA:3.30.160.GENE3D); IPR013087 (G3DSA:3.30.160.GENE3D); IPR013087 (G3DSA:3.30.160.GENE3D); PF13465 (PFAM); IPR013087 (G3DSA:3.30.160.GENE3D); IPR007087 (PFAM); PTHR24409 (PANTHER); IPR007087 (PROSITE_PATTERNS); IPR007087 (PROSITE_PATTERNS); IPR007087 (PROSITE_PATTERNS); IPR007087 (PROSITE_PATTERNS); IPR007087 (PROSITE_PATTERNS); IPR007087 (PROSITE_PROFILES); IPR007087 (PROSITE_PROFILES); IPR007087 (PROSITE_PROFILES); IPR007087 (PROSITE_PROFILES); IPR007087 (PROSITE_PROFILES); IPR007087 (PROSITE_PROFILES); SSF57667 (SUPERFAMILY); SSF57667 (SUPERFAMILY); SSF57667 (SUPERFAMILY) |
| 1728 | c62856_g1_i1_len_855_path_833_0_854_0    | 13  | interstitial collagenase                        | 285 | 3.24E-23  | 61.20% | 0.153   | IPR018487 (SMART); IPR000585 (G3DSA:2.110.10.GENE3D); IPR018487 (PFAM); PTHR10201 (PANTHER); IPR018486 (PROSITE_PATTERNS); IPR018487 (PROSITE_PROFILES); IPR018487 (PROSITE_PROFILES); IPR000585 (SUPERFAMILY)                                                                                                                                                                                                                                                                                                                                                                                                                         |
| 1729 | c62871_g1_i1_len_300_path_278_0_299_3    | 3   | prostaglandin g h synthase 2-like isoform x3    | 100 | 1.50E-35  | 70.30% | 0.118   | G3DSA:2.10.25.10 (GENE3D); PTHR11903 (PANTHER); PTHR11903:SF10 (PANTHER); IPR000742 (PROSITE_PROFILES); SSF57196 (SUPERFAMILY)                                                                                                                                                                                                                                                                                                                                                                                                                                                                                                         |
| 1730 | c63049_g1_i1_len_1484_path_1_0_1483_2    | 33  | hemagglutinin proteinase                        | 483 | 6.34E-102 | 55.00% | 0.098   | IPR023612 (PRINTS); IPR025711 (PFAM); IPR001570 (PFAM); IPR013856 (G3DSA:3.10.170.GENE3D); G3DSA:1.10.390.10 (GENE3D); IPR011096 (PFAM); IPR013856 (PFAM); SSF55486 (SUPERFAMILY)                                                                                                                                                                                                                                                                                                                                                                                                                                                      |
| 1731 | c63088_g1_i1_len_315_path_1_0_314_3      | 3   | adp-ribosylation factor 1                       | 105 | 7.46E-60  | 99.80% | 0.108   | IPR024156 (SMART); IPR027417 (G3DSA:3.40.50.GENE3D); IPR006689 (PFAM); PTHR11711 (PANTHER); PTHR11711:SF104 (PANTHER); IPR024156 (PROSITE_PROFILES); IPR027417 (SUPERFAMILY)                                                                                                                                                                                                                                                                                                                                                                                                                                                           |
| 1732 | c63142_g1_i1_len_1992_path_1_0_1991_4    | 38  | fidgetin-like protein 1                         | 658 | 0         | 80.80% | 0.102   | IPR003593 (SMART); IPR003959 (PFAM); IPR027417 (G3DSA:3.40.50.GENE3D); IPR015415 (PFAM); G3DSA:1.10.8.60 (GENE3D); PTHR23074 (PANTHER); PTHR23074:SF75 (PANTHER); IPR003960 (PROSITE_PATTERNS); IPR027417 (SUPERFAMILY)                                                                                                                                                                                                                                                                                                                                                                                                                |
| 1733 | c63371_g1_i1_len_175_path_1_0_174_3      | 0   | cg7386- partial                                 | 59  | 1.02E-08  | 65.90% | 0.105   | IPR015880 (SMART); IPR013087 (G3DSA:3.30.160.GENE3D); IPR013087 (G3DSA:3.30.160.GENE3D); IPR007087 (PFAM); IPR007087 (PROSITE_PATTERNS); IPR007087 (PROSITE_PROFILES); SSF57667 (SUPERFAMILY)                                                                                                                                                                                                                                                                                                                                                                                                                                          |
| 1734 | c63665_g1_i1_len_792_path_797_0_791_1    | 23  | peptidyl-prolyl cis-trans                       | 264 | 6.03E-56  | 70.90% | 0.098   | IPR029000 (G3DSA:2.40.100.GENE3D); IPR002130 (PFAM); PTHR11071:SF193 (PANTHER); IPR024936 (PANTHER); NON_CYTOPLASMIC_DOMAIN (PHOBIUS); CYTOPLASMIC_DOMAIN (PHOBIUS); TRANSMEMBRANE (PHOBIUS); IPR002130 (PROSITE_PROFILES); IPR029000 (SUPERFAMILY)                                                                                                                                                                                                                                                                                                                                                                                    |



|      |                                          |       |                                                                          |     |           |        |         |                                                                                                                                                                                                                                                                                                                                                                                                                                                                                                                                                                                               |
|------|------------------------------------------|-------|--------------------------------------------------------------------------|-----|-----------|--------|---------|-----------------------------------------------------------------------------------------------------------------------------------------------------------------------------------------------------------------------------------------------------------------------------------------------------------------------------------------------------------------------------------------------------------------------------------------------------------------------------------------------------------------------------------------------------------------------------------------------|
| 1744 | c6440_g1_i1_len_2317_path_2_0_2316_1     | 46156 | heat shock 70 kda protein cognate 4                                      | 765 | 0         | 94.40% | 0.168   | Coil (COILS); IPR013126 (PRINTS); G3DSA:3.30.420.40 (GENE3D); G3DSA:3.90.640.10 (GENE3D); IPR029047 (G3DSA:2.60.34.GENE3D); G3DSA:3.30.420.40 (GENE3D); IPR013126 (PFAM); IPR029048 (G3DSA:1.20.1270.GENE3D); G3DSA:3.30.30.30 (GENE3D); PTHR19375:SF142 (PANTHER); PTHR19375 (PANTHER); IPR018181 (PROSITE_PATTERNS); IPR018181 (PROSITE_PATTERNS); IPR018181 (PROSITE_PATTERNS); NON_CYTOPLASMIC_DOMAIN (PHOBIUS); TRANSMEMBRANE (PHOBIUS); CYTOPLASMIC_DOMAIN (PHOBIUS); SSF53067 (SUPERFAMILY); SSF53067 (SUPERFAMILY); IPR029047 (SUPERFAMILY); IPR029048 (SUPERFAMILY); TMhelix (TMHMM) |
| 1745 | c64978_g1_i1_len_626_path_604_0_625_3    | 15    | ---NA---                                                                 | 204 |           |        | 0.153   | IPR000742 (SMART); IPR023413 (G3DSA:2.40.155.GENE3D); IPR024731 (PFAM); IPR013032 (PROSITE_PATTERNS); IPR000152 (PROSITE_PATTERNS); NON_CYTOPLASMIC_DOMAIN (PHOBIUS); CYTOPLASMIC_DOMAIN (PHOBIUS); TRANSMEMBRANE (PHOBIUS); NON_CYTOPLASMIC_DOMAIN (PHOBIUS); TRANSMEMBRANE (PHOBIUS); TRANSMEMBRANE (PHOBIUS); CYTOPLASMIC_DOMAIN (PHOBIUS); IPR000742 (PROSITE_PROFILES); SSF57196 (SUPERFAMILY); TMhelix (TMHMM); TMhelix (TMHMM); TMhelix (TMHMM); TMhelix (TMHMM)                                                                                                                       |
| 1746 | c65092_g1_i1_len_279_path_257_0_278_1    | 2     | lysyl-trna synthetase                                                    | 93  | 1.04E-46  | 90.50% | 0.108   | G3DSA:3.30.930.10 (GENE3D); IPR004364 (PFAM); IPR018150 (PANTHER); PTHR22594:SF25 (PANTHER); IPR006195 (PROSITE_PROFILES); SSF55681 (SUPERFAMILY)                                                                                                                                                                                                                                                                                                                                                                                                                                             |
| 1747 | c65499_g1_i1_len_1025_path_1003_0_1024_1 | 15    | serine partial                                                           | 336 | 4.15E-36  | 63.10% | 0.101   | IPR029058 (G3DSA:3.40.50.GENE3D); IPR001563 (PFAM); PTHR11802:SF30 (PANTHER); IPR001563 (PANTHER); IPR029058 (SUPERFAMILY)                                                                                                                                                                                                                                                                                                                                                                                                                                                                    |
| 1748 | c65619_g1_i1_len_595_path_573_0_594_0    | 7     | 5 -nucleotidase domain containing isoform cra_d                          | 199 | 5.72E-25  | 68.80% | 0.295   | PF13900 (PFAM); PTHR16213 (PANTHER)                                                                                                                                                                                                                                                                                                                                                                                                                                                                                                                                                           |
| 1749 | c65619_g1_i1_len_595_path_573_0_594_4    | 7     | mre11 meiotic recombination 11 homolog a (cerevisiae) isoform cra_b      | 198 | 1.04E-20  | 73.00% | 0.146   | PTHR22878 (PANTHER)                                                                                                                                                                                                                                                                                                                                                                                                                                                                                                                                                                           |
| 1750 | c65772_g1_i1_len_860_path_838_0_859_2    | 129   | collagen and calcium-binding egf domain-containing protein 1-like        | 281 | 4.60E-19  | 56.30% | 0.105   | IPR008160 (PFAM); PTHR24023 (PANTHER)                                                                                                                                                                                                                                                                                                                                                                                                                                                                                                                                                         |
| 1751 | c65772_g1_i1_len_860_path_838_0_859_4    | 129   | large adhesin                                                            | 282 | 3.04E-10  | 41.25% | 0.153   | no IPS match                                                                                                                                                                                                                                                                                                                                                                                                                                                                                                                                                                                  |
| 1752 | c65815_g1_i1_len_597_path_575_0_596_2    | 3     | secreted frizzled-related protein 5                                      | 199 | 4.13E-56  | 57.40% | 0.105   | IPR018933 (PFAM); IPR020067 (G3DSA:1.10.2000.GENE3D); G3DSA:2.40.50.120 (GENE3D); IPR020067 (PFAM); PTHR11309:SF80 (PANTHER); IPR015526 (PANTHER); IPR001134 (PROSITE_PROFILES); IPR020067 (PROSITE_PROFILES); IPR008993 (SUPERFAMILY); IPR020067 (SUPERFAMILY)                                                                                                                                                                                                                                                                                                                               |
| 1753 | c66072_g1_i1_len_609_path_1_0_608_2      | 9     | penicillin-binding protein partial                                       | 203 | 2.85E-138 | 99.10% | 0.159   | IPR001264 (PFAM); IPR012338 (G3DSA:3.40.710.GENE3D); G3DSA:1.10.3810.10 (GENE3D); PTHR32282:SF1 (PANTHER); PTHR32282 (PANTHER); IPR023346 (SUPERFAMILY)                                                                                                                                                                                                                                                                                                                                                                                                                                       |
| 1754 | c66172_g1_i1_len_889_path_867_0_888_1    | 30    | gamma-interferon-inducible lysosomal thiol reductase                     | 292 | 9.36E-44  | 51.40% | 0.380 Y | IPR004911 (PFAM); IPR004911 (PANTHER); PTHR13234:SF8 (PANTHER)                                                                                                                                                                                                                                                                                                                                                                                                                                                                                                                                |
| 1755 | c66182_g2_i1_len_343_path_905_0_342_3    | 3     | coatomer subunit alpha                                                   | 115 | 2.39E-15  | 90.10% | 0.111   | TRANSMEMBRANE (PHOBIUS); CYTOPLASMIC_DOMAIN (PHOBIUS); CYTOPLASMIC_DOMAIN (PHOBIUS); NON_CYTOPLASMIC_DOMAIN (PHOBIUS); TRANSMEMBRANE (PHOBIUS); TMhelix (TMHMM); TMhelix (TMHMM)                                                                                                                                                                                                                                                                                                                                                                                                              |
| 1756 | c66287_g1_i1_len_1143_path_1121_0_1142_1 | 23    | 5 -nucleotidase                                                          | 381 | 1.09E-125 | 70.80% | 0.106   | IPR008334 (PFAM); IPR008334 (G3DSA:3.90.780.GENE3D); IPR006179 (PANTHER); PTHR11575:SF7 (PANTHER); NON_CYTOPLASMIC_DOMAIN (PHOBIUS); TRANSMEMBRANE (PHOBIUS); CYTOPLASMIC_DOMAIN (PHOBIUS); IPR008334 (SUPERFAMILY); TMhelix (TMHMM)                                                                                                                                                                                                                                                                                                                                                          |
| 1757 | c66572_g1_i1_len_255_path_1_0_254_0      | 0     | adamts-like protein 5                                                    | 85  | 4.37E-11  | 70.10% | 0.143   | IPR010294 (PFAM); PTHR13723 (PANTHER)                                                                                                                                                                                                                                                                                                                                                                                                                                                                                                                                                         |
| 1758 | c66607_g1_i1_len_1033_path_1047_0_1032_4 | 5     | superoxide dismutase                                                     | 344 | 4.47E-65  | 96.80% | 0.15    | IPR001189 (PRINTS); IPR019831 (PFAM); G3DSA:1.10.287.990 (GENE3D); PTHR11404:SF9 (PANTHER); IPR001189 (PANTHER); IPR019831 (SUPERFAMILY)                                                                                                                                                                                                                                                                                                                                                                                                                                                      |
| 1759 | c66961_g1_i1_len_358_path_1_0_357_2      | 1     | agrin-like isoform x5                                                    | 119 | 1.85E-23  | 62.10% | 0.103   | G3DSA:2.40.50.120 (GENE3D); IPR004850 (PFAM); IPR004850 (PROSITE_PROFILES); IPR008993 (SUPERFAMILY)                                                                                                                                                                                                                                                                                                                                                                                                                                                                                           |
| 1760 | c6717_g1_i1_len_305_path_1_0_304_1       | 2     | formate dehydrogenase h                                                  | 102 | 2.67E-68  | 99.90% | 0.109   | G3DSA:2.20.25.90 (GENE3D); IPR006656 (PFAM); G3DSA:3.40.50.740 (GENE3D); PTHR11615:SF112 (PANTHER); PTHR11615 (PANTHER); IPR006963 (PROSITE_PROFILES); SSF53706 (SUPERFAMILY)                                                                                                                                                                                                                                                                                                                                                                                                                 |
| 1761 | c6717_g2_i1_len_293_path_565_0_292_3     | 0     | formate dehydrogenase h                                                  | 98  | 1.15E-60  | 98.00% | 0.111   | G3DSA:3.40.228.10 (GENE3D); IPR006656 (PFAM); PTHR11615 (PANTHER); PTHR11615:SF112 (PANTHER); SSF53706 (SUPERFAMILY)                                                                                                                                                                                                                                                                                                                                                                                                                                                                          |
| 1762 | c67203_g1_i1_len_267_path_245_0_266_3    | 0     | tat (twin-arginine translocation) pathway signal sequence domain protein | 89  | 3.13E-59  | 99.80% | 0.102   | IPR006963 (PFAM); IPR006656 (PFAM); G3DSA:3.40.50.740 (GENE3D); G3DSA:2.20.25.90 (GENE3D); PTHR11615 (PANTHER); PTHR11615:SF37 (PANTHER); IPR006963 (PROSITE_PROFILES); SSF53706 (SUPERFAMILY)                                                                                                                                                                                                                                                                                                                                                                                                |

|      |                                                              |      |                                                                  |     |           |         |         |                                                                                                                                                                                                                                                                                                                                                                                                                                                                                                                                                                                            |
|------|--------------------------------------------------------------|------|------------------------------------------------------------------|-----|-----------|---------|---------|--------------------------------------------------------------------------------------------------------------------------------------------------------------------------------------------------------------------------------------------------------------------------------------------------------------------------------------------------------------------------------------------------------------------------------------------------------------------------------------------------------------------------------------------------------------------------------------------|
| 1763 | c67246_g1_i1_len_816_path_794_0_815_3                        | 6    | glycosyltransferase 1 domain-containing protein 1                | 272 | 1.83E-39  | 57.00%  | 0.233   | PTHR12526:SF331 (PANTHER); PTHR12526 (PANTHER); TRANSMEMBRANE (PHOBIUS); CYTOPLASMIC_DOMAIN (PHOBIUS); NON_CYTOPLASMIC_DOMAIN (PHOBIUS); CYTOPLASMIC_DOMAIN (PHOBIUS); TRANSMEMBRANE (PHOBIUS); SSF53756 (SUPERFAMILY); TMhelix (TMHMM); TMhelix (TMHMM)                                                                                                                                                                                                                                                                                                                                   |
| 1764 | c67964_g1_i1_len_388_path_366_0_387_1                        | 1    | serine endoprotease partial                                      | 129 | 3.78E-76  | 100.00% | 0.108   | IPR001940 (PRINTS); G3DSA:2.40.10.10 (GENE3D); IPR001478 (G3DSA:2.30.42.GENE3D); IPR001254 (PFAM); PTHR22939 (PANTHER); IPR001478 (SUPERFAMILY); IPR009003 (SUPERFAMILY)                                                                                                                                                                                                                                                                                                                                                                                                                   |
| 1765 | c68000_g1_i1_len_841_path_819_0_840_1                        | 13   | collagen triple helix repeat family protein                      | 280 | 3.52E-07  | 50.00%  | 0.147   | no IPS match                                                                                                                                                                                                                                                                                                                                                                                                                                                                                                                                                                               |
| 1766 | c68000_g1_i1_len_841_path_819_0_840_4                        | 13   | #NAME?                                                           | 280 | 3.18E-14  | 49.00%  | 0.112   | no IPS match                                                                                                                                                                                                                                                                                                                                                                                                                                                                                                                                                                               |
| 1767 | c68430_g1_i1_len_637_path_36_0_636_1                         | 6    | zinc finger and btb domain-containing protein 49-like isoform x2 | 212 | 3.60E-23  | 73.60%  | 0.099   | IPR015880 (SMART); IPR007087 (PFAM); IPR013087 (G3DSA:3.30.160.GENE3D); IPR013087 (G3DSA:3.30.160.GENE3D); PTHR24409 (PANTHER); IPR007087 (PROSITE_PATTERNS); IPR007087 (PROSITE_PATTERNS); CYTOPLASMIC_DOMAIN (PHOBIUS); TRANSMEMBRANE (PHOBIUS); NON_CYTOPLASMIC_DOMAIN (PHOBIUS); IPR007087 (PROSITE_PROFILES); IPR007087 (PROSITE_PROFILES); SSF57667 (SUPERFAMILY); TMhelix (TMHMM)                                                                                                                                                                                                   |
| 1768 | c68704_g1_i1_len_492_path_1_0_491_0                          | 7    | dnaj homolog subfamily c member 25 homolog                       | 164 | 9.74E-60  | 80.10%  | 0.415 Y | Coil (COILS); IPR001623 (PRINTS); IPR001623 (SMART); IPR001623 (PFAM); IPR001623 (G3DSA:1.10.287.GENE3D); PTHR24078 (PANTHER); PTHR24078:SF125 (PANTHER); IPR018253 (PROSITE_PATTERNS); CYTOPLASMIC_DOMAIN (PHOBIUS); TRANSMEMBRANE (PHOBIUS); NON_CYTOPLASMIC_DOMAIN (PHOBIUS); IPR001623 (PROSITE_PROFILES); IPR001623 (SUPERFAMILY); TMhelix (TMHMM)                                                                                                                                                                                                                                    |
| 1769 | c68721_g1_i1_len_814_path_1_0_813_5                          | 8    | sugar partial                                                    | 271 | 0         | 100.00% | 0.1     | IPR013781 (G3DSA:3.20.20.GENE3D); G3DSA:3.90.400.10 (GENE3D); IPR006047 (PFAM); PTHR10357:SF132 (PANTHER); IPR015902 (PANTHER); IPR017853 (SUPERFAMILY)                                                                                                                                                                                                                                                                                                                                                                                                                                    |
| 1770 | c6964_g1_i1_len_2377_path_55_0_348_403_349_352_54_353_2376_2 | 1302 | protein them6                                                    | 786 | 2.44E-34  | 58.40%  | 0.114   | Coil (COILS); IPR029069 (G3DSA:3.10.129.GENE3D); PF13279 (PFAM); PTHR12475 (PANTHER); TRANSMEMBRANE (PHOBIUS); CYTOPLASMIC_DOMAIN (PHOBIUS); TRANSMEMBRANE (PHOBIUS); CYTOPLASMIC_DOMAIN (PHOBIUS); NON_CYTOPLASMIC_DOMAIN (PHOBIUS); CYTOPLASMIC_DOMAIN (PHOBIUS); NON_CYTOPLASMIC_DOMAIN (PHOBIUS); TRANSMEMBRANE (PHOBIUS); TRANSMEMBRANE (PHOBIUS); TRANSMEMBRANE (PHOBIUS); TRANSMEMBRANE (PHOBIUS); NON_CYTOPLASMIC_DOMAIN (PHOBIUS); IPR029069 (SUPERFAMILY); TMhelix (TMHMM); TMhelix (TMHMM); TMhelix (TMHMM); TMhelix (TMHMM); TMhelix (TMHMM); TMhelix (TMHMM); TMhelix (TMHMM) |
| 1771 | c69984_g1_i1_len_154_path_1_0_153_3                          | 2    | ekc keops complex subunit tprkb isoform x2                       | 52  | 2.71E-12  | 81.80%  | 0.176   | no IPS match                                                                                                                                                                                                                                                                                                                                                                                                                                                                                                                                                                               |
| 1772 | c69984_g1_i1_len_154_path_1_0_153_4                          | 2    | nfs1 nitrogen fixation 1 homolog ( cerevisiae)                   | 51  | 4.56E-19  | 83.20%  | 0.127   | PF13900 (PFAM); PTHR16213 (PANTHER)                                                                                                                                                                                                                                                                                                                                                                                                                                                                                                                                                        |
| 1773 | c69984_g1_i1_len_154_path_1_0_153_5                          | 2    | coiled-coil domain-containing protein 122                        | 51  | 4.13E-21  | 88.80%  | 0.13    | PTHR12138 (PANTHER)                                                                                                                                                                                                                                                                                                                                                                                                                                                                                                                                                                        |
| 1774 | c69992_g1_i1_len_734_path_1_0_733_0                          | 15   | probable nuclear transport factor 2 isoform x1                   | 245 | 9.14E-63  | 81.90%  | 0.152   | IPR002075 (PFAM); G3DSA:3.10.450.50 (GENE3D); PTHR12612 (PANTHER); IPR018222 (PROSITE_PROFILES); SSF54427 (SUPERFAMILY)                                                                                                                                                                                                                                                                                                                                                                                                                                                                    |
| 1775 | c70102_g1_i1_len_669_path_649_0_668_2                        | 2    | eosinophil peroxidase                                            | 223 | 2.85E-08  | 61.90%  | 0.728 Y | IPR019791 (PFAM); IPR019791 (G3DSA:1.10.640.GENE3D); PTHR11475 (PANTHER); SIGNAL_PEPTIDE_N_REGION (PHOBIUS); NON_CYTOPLASMIC_DOMAIN (PHOBIUS); SIGNAL_PEPTIDE_H_REGION (PHOBIUS); SIGNAL_PEPTIDE_C_REGION (PHOBIUS); SIGNAL_PEPTIDE (PHOBIUS); SignalP-noTM (SIGNALP_EUK); IPR010255 (SUPERFAMILY)                                                                                                                                                                                                                                                                                         |
| 1776 | c70359_g1_i1_len_756_path_734_0_755_1                        | 5    | chaperone protein                                                | 252 | 2.97E-150 | 99.90%  | 0.106   | IPR001623 (PRINTS); IPR001623 (SMART); IPR001623 (PFAM); IPR001305 (G3DSA:2.10.230.GENE3D); IPR001623 (G3DSA:1.10.287.GENE3D); IPR001305 (PFAM); G3DSA:2.60.260.20 (GENE3D); PTHR24076:SF78 (PANTHER); PTHR24076 (PANTHER); IPR018253 (PROSITE_PATTERNS); IPR001623 (PROSITE_PROFILES); IPR001305 (PROSITE_PROFILES); IPR001623 (SUPERFAMILY); IPR001305 (SUPERFAMILY)                                                                                                                                                                                                                     |
| 1777 | c71276_g1_i1_len_542_path_1_0_541_0                          | 2    | tout- isoform a                                                  | 176 | 2.55E-80  | 78.30%  | 0.351 Y | IPR004263 (PFAM); PTHR11062 (PANTHER); PTHR11062:SF7 (PANTHER)                                                                                                                                                                                                                                                                                                                                                                                                                                                                                                                             |
| 1778 | c71289_g1_i1_len_351_path_1_0_350_1                          | 2    | choline partial                                                  | 117 | 1.58E-76  | 98.20%  | 0.103   | IPR007867 (PFAM); G3DSA:3.50.50.60 (GENE3D); G3DSA:3.30.560.10 (GENE3D); PTHR11552 (PANTHER); SSF51905 (SUPERFAMILY); SSF54373 (SUPERFAMILY)                                                                                                                                                                                                                                                                                                                                                                                                                                               |
| 1779 | c71366_g1_i1_len_142_path_120_0_141_4                        | 0    | isoform j                                                        | 47  | 1.61E-08  | 67.80%  | 0.105   | IPR029070 (G3DSA:3.10.50.GENE3D); IPR029070 (SUPERFAMILY)                                                                                                                                                                                                                                                                                                                                                                                                                                                                                                                                  |

|      |                                                                                 |    |                                                               |     |           |         |         |                                                                                                                                                                                                                                                                                                                                                                                                                       |
|------|---------------------------------------------------------------------------------|----|---------------------------------------------------------------|-----|-----------|---------|---------|-----------------------------------------------------------------------------------------------------------------------------------------------------------------------------------------------------------------------------------------------------------------------------------------------------------------------------------------------------------------------------------------------------------------------|
| 1780 | c72_g1_i1_len_1469_path_1522_0_1468_2                                           | 82 | c-type lectin 4                                               | 489 | 3.38E-94  | 77.90%  | 0.362 Y | IPR016186 (G3DSA:3.10.100.GENE3D); PTHR21407:SF5 (PANTHER); PTHR21407 (PANTHER); NON_CYTOPLASMIC_DOMAIN (PHOBIUS); TRANSMEMBRANE (PHOBIUS); CYTOPLASMIC_DOMAIN (PHOBIUS); TRANSMEMBRANE (PHOBIUS); NON_CYTOPLASMIC_DOMAIN (PHOBIUS); TRANSMEMBRANE (PHOBIUS); CYTOPLASMIC_DOMAIN (PHOBIUS); IPR001304 (PROSITE_PROFILES); IPR016187 (SUPERFAMILY); TMhelix (TMHMM); TMhelix (TMHMM); TMhelix (TMHMM); TMhelix (TMHMM) |
| 1781 | c72560_g1_i1_len_144_path_122_0_143_2                                           | 0  | geisolin-like allergen der f 16                               | 48  | 3.96E-12  | 68.60%  | 0.108   | IPR007123 (PFAM); IPR029006 (G3DSA:3.40.20.GENE3D); IPR030016 (PTHR11977:PANTHER); IPR007122 (PANTHER); SSF55753 (SUPERFAMILY) IPR001314 (PRINTS); IPR001254 (SMART); G3DSA:2.40.10.10 (GENE3D); IPR001254 (PFAM); G3DSA:2.40.10.10 (GENE3D); G3DSA:2.40.10.10 (GENE3D); PTHR24265 (PANTHER); IPR018114 (PROSITE_PATTERNS); IPR001254 (PROSITE_PROFILES); IPR009003 (SUPERFAMILY)                                     |
| 1782 | c7375_g2_i1_len_1534_path_2256_0_1533_2                                         | 32 | venom protease-like                                           | 506 | 2.08E-70  | 56.00%  | 0.215   | PR00014 (PRINTS); IPR003961 (SMART); IPR003598 (SMART); IPR003599 (SMART); IPR003961 (PFAM); IPR013098 (PFAM); IPR013783 (G3DSA:2.60.40.GENE3D); IPR013783 (G3DSA:2.60.40.GENE3D); PTHR19897 (PANTHER); PTHR19897:SF155 (PANTHER); IPR003961 (PROSITE_PROFILES); IPR007110 (PROSITE_PROFILES); SSF48726 (SUPERFAMILY); IPR003961 (SUPERFAMILY)                                                                        |
| 1783 | c7376_g1_i1_len_601_path_1_0_600_5                                              | 5  | low quality protein: twitchin-like                            | 200 | 1.20E-83  | 78.90%  | 0.119   | PR00014 (PRINTS); IPR003961 (SMART); IPR013098 (PFAM); IPR013783 (G3DSA:2.60.40.GENE3D); IPR013783 (G3DSA:2.60.40.GENE3D); IPR013783 (G3DSA:2.60.40.GENE3D); IPR003961 (PFAM); PTHR19897 (PANTHER); PTHR19897:SF142 (PANTHER); IPR003961 (PROSITE_PROFILES); SSF48726 (SUPERFAMILY); IPR003961 (SUPERFAMILY); SSF48726 (SUPERFAMILY)                                                                                  |
| 1784 | c7376_g2_i1_len_716_path_1875_0_715_3                                           | 6  | twitchin isoform x4                                           | 239 | 2.34E-118 | 86.00%  | 0.197   | PR00014 (PRINTS); IPR003961 (SMART); IPR013098 (PFAM); IPR013783 (G3DSA:2.60.40.GENE3D); IPR013783 (G3DSA:2.60.40.GENE3D); IPR013783 (G3DSA:2.60.40.GENE3D); IPR003961 (PFAM); PTHR19897 (PANTHER); PTHR19897:SF142 (PANTHER); IPR003961 (PROSITE_PROFILES); SSF48726 (SUPERFAMILY); IPR003961 (SUPERFAMILY); SSF48726 (SUPERFAMILY)                                                                                  |
| 1785 | c73893_g1_i1_len_231_path_209_0_230_3                                           | 0  | n-acetyl galactosaminyl transferase                           | 77  | 1.62E-17  | 85.40%  | 0.159   | IPR029044 (G3DSA:3.90.550.GENE3D); IPR001173 (PFAM); PTHR11675 (PANTHER); IPR029044 (SUPERFAMILY)                                                                                                                                                                                                                                                                                                                     |
| 1786 | c74300_g1_i1_len_482_path_1_0_481_4                                             | 8  | gram negative bacteria binding protein 1                      | 161 | 6.63E-47  | 68.10%  | 0.102   | IPR013320 (G3DSA:2.60.120.GENE3D); IPR000757 (PFAM); PTHR10963:SF4 (PANTHER); PTHR10963 (PANTHER); IPR013320 (SUPERFAMILY) IPR001672 (PRINTS); IPR001672 (PFAM); G3DSA:3.40.50.10490 (GENE3D); IPR023096 (G3DSA:1.10.1390.GENE3D); IPR001672 (PANTHER); PTHR11469:SF7 (PANTHER); IPR018189 (PROSITE_PATTERNS); IPR001672 (PROSITE_PROFILES); SSF53697 (SUPERFAMILY)                                                   |
| 1787 | c74308_g1_i1_len_525_path_1_0_524_5                                             | 1  | glucose-6-phosphate partial                                   | 175 | 2.71E-114 | 100.00% | 0.11    | Coil (COILS); G3DSA:3.30.200.20 (GENE3D); IPR000719 (PFAM); IPR020636 (PANTHER); IPR000719 (PROSITE_PROFILES); IPR011009 (SUPERFAMILY) IPR012341 (G3DSA:1.50.10.GENE3D); IPR002037 (PFAM); IPR008928 (SUPERFAMILY)                                                                                                                                                                                                    |
| 1788 | c74795_g1_i1_len_173_path_159_0_172_4                                           | 0  | calcium calmodulin-dependent protein kinase type 1 isoform x2 | 58  | 1.21E-26  | 96.80%  | 0.095   | IPR015880 (SMART); IPR013087 (G3DSA:3.30.160.GENE3D); PF13465 (PFAM); IPR007087 (PFAM); IPR013087 (G3DSA:3.30.160.GENE3D); PTHR24409:SF14 (PANTHER); PTHR24409 (PANTHER); IPR007087 (PROSITE_PATTERNS); IPR007087 (PROSITE_PATTERNS); IPR007087 (PROSITE_PATTERNS); IPR007087 (PROSITE_PROFILES); IPR007087 (PROSITE_PROFILES); SSF57667 (SUPERFAMILY)                                                                |
| 1789 | c75202_g1_i1_len_363_path_383_0_362_2                                           | 2  | endo- -d- partial                                             | 121 | 6.26E-82  | 100.00% | 0.12    | IPR015880 (SMART); IPR013087 (G3DSA:3.30.160.GENE3D); PF13465 (PFAM); IPR007087 (PFAM); IPR013087 (G3DSA:3.30.160.GENE3D); PTHR24409:SF14 (PANTHER); PTHR24409 (PANTHER); IPR007087 (PROSITE_PATTERNS); IPR007087 (PROSITE_PATTERNS); IPR007087 (PROSITE_PATTERNS); IPR007087 (PROSITE_PROFILES); IPR007087 (PROSITE_PROFILES); SSF57667 (SUPERFAMILY)                                                                |
| 1790 | c75670_g1_i1_len_261_path_1_0_260_3                                             | 0  | zinc c2h2 type                                                | 87  | 4.12E-15  | 59.30%  | 0.126   | IPR013856 (PFAM); IPR013856 (G3DSA:3.10.170.GENE3D); SSF55486 (SUPERFAMILY)                                                                                                                                                                                                                                                                                                                                           |
| 1791 | c7616_g1_i1_len_627_path_1443_0_13_642_14_65_694_66_96_724_97_595_694_596_626_0 | 13 | plasmid recombination protein                                 | 209 | 2.17E-08  | 45.00%  | 0.106   | no IPS match                                                                                                                                                                                                                                                                                                                                                                                                          |
| 1792 | c76668_g1_i1_len_189_path_167_0_188_0                                           | 0  | elastase                                                      | 63  | 4.01E-13  | 68.60%  | 0.106   | IPR013856 (PFAM); IPR013856 (G3DSA:3.10.170.GENE3D); SSF55486 (SUPERFAMILY)                                                                                                                                                                                                                                                                                                                                           |
| 1793 | c7719_g1_i1_len_646_path_670_0_263_933_264_267_24_268_645_1                     | 28 | antigen 5 scp domain-containing                               | 215 | 4.53E-12  | 55.30%  | 0.387 Y | IPR014044 (G3DSA:3.40.33.GENE3D); IPR014044 (PFAM); IPR001283 (PANTHER); SIGNAL_PEPTIDE (PHOBIUS); SIGNAL_PEPTIDE_C_REGION (PHOBIUS); NON_CYTOPLASMIC_DOMAIN (PHOBIUS); SIGNAL_PEPTIDE_H_REGION (PHOBIUS); SIGNAL_PEPTIDE_N_REGION (PHOBIUS); IPR014044 (SUPERFAMILY)                                                                                                                                                 |
| 1794 | c77954_g1_i1_len_679_path_1_0_678_0                                             | 4  | laminin subunit alpha                                         | 227 | 2.47E-23  | 69.30%  | 0.113   | IPR013320 (G3DSA:2.60.120.GENE3D); IPR013320 (SUPERFAMILY) IPR002110 (SMART); IPR020683 (PFAM); IPR020683 (G3DSA:1.25.40.GENE3D); PTHR24139 (PANTHER); PTHR24139:SF26 (PANTHER); NON_CYTOPLASMIC_DOMAIN (PHOBIUS); TRANSMEMBRANE (PHOBIUS); CYTOPLASMIC_DOMAIN (PHOBIUS); IPR002110 (PROSITE_PROFILES); IPR020683 (PROSITE_PROFILES); IPR002110 (PROSITE_PROFILES); IPR020683 (SUPERFAMILY); TMhelix (TMHMM)          |
| 1795 | c784_g1_i1_len_825_path_1286_0_450_242_451_824_1                                | 16 | developmental protein cactus                                  | 270 | 2.70E-25  | 70.70%  | 0.114   | IPR002110 (SMART); IPR020683 (PFAM); IPR020683 (G3DSA:1.25.40.GENE3D); PTHR24139 (PANTHER); PTHR24139:SF26 (PANTHER); NON_CYTOPLASMIC_DOMAIN (PHOBIUS); TRANSMEMBRANE (PHOBIUS); CYTOPLASMIC_DOMAIN (PHOBIUS); IPR002110 (PROSITE_PROFILES); IPR020683 (PROSITE_PROFILES); IPR002110 (PROSITE_PROFILES); IPR020683 (SUPERFAMILY); TMhelix (TMHMM)                                                                     |



|      |                                                  |      |                                                                                                                                                                            |     |           |        |       |                                                                                                                                                                                                                                                                                                                                                                                                                                                                                                                                                                                                                                                                                                          |
|------|--------------------------------------------------|------|----------------------------------------------------------------------------------------------------------------------------------------------------------------------------|-----|-----------|--------|-------|----------------------------------------------------------------------------------------------------------------------------------------------------------------------------------------------------------------------------------------------------------------------------------------------------------------------------------------------------------------------------------------------------------------------------------------------------------------------------------------------------------------------------------------------------------------------------------------------------------------------------------------------------------------------------------------------------------|
| 1796 | c784_g1_i2_len_615_path_1_0_240_242_241_61_4_1   | 5    | nf-kappa-b inhibitor cactus-like                                                                                                                                           | 200 | 3.85E-51  | 72.00% | 0.14  | IPR002110 (SMART); IPR020683 (PFAM); IPR020683 (G3DSA:1.25.40.GENE3D); PTHR24139 (PANTHER); PTHR24139:SF26 (PANTHER); IPR002110 (PROSITE_PROFILES); IPR002110 (PROSITE_PROFILES); IPR020683 (PROSITE_PROFILES); IPR020683 (SUPERFAMILY)                                                                                                                                                                                                                                                                                                                                                                                                                                                                  |
| 1797 | c7868_g1_i1_len_472_path_478_0_425_904_426_471_2 | 2    | serine protease nudel                                                                                                                                                      | 157 | 2.16E-18  | 81.10% | 0.132 | IPR001254 (PFAM); G3DSA:2.40.10.10 (GENE3D); PTHR24256 (PANTHER); IPR018114 (PROSITE_PATTERNS); TRANSMEMBRANE (PHOBIUS); NON_CYTOPLASMIC_DOMAIN (PHOBIUS); CYTOPLASMIC_DOMAIN (PHOBIUS); IPR009003 (SUPERFAMILY)                                                                                                                                                                                                                                                                                                                                                                                                                                                                                         |
| 1798 | c80517_g1_i1_len_328_path_306_0_327_5            | 1    | zinc finger protein 271 (zinc finger protein 7) (zinc finger protein znfphe133) (epstein-barr virus-induced zinc finger protein) (znf-eb) (ct-zfp48) (zinc finger protein) | 109 | 7.79E-18  | 62.20% | 0.099 | IPR015880 (SMART); PF13465 (PFAM); IPR007087 (PFAM); PF13912 (PFAM); IPR013087 (G3DSA:3.30.160.GENE3D); IPR013087 (G3DSA:3.30.160.GENE3D); IPR013087 (G3DSA:3.30.160.GENE3D); PTHR24409 (PANTHER); PTHR24409:SF14 (PANTHER); IPR007087 (PROSITE_PATTERNS); IPR007087 (PROSITE_PATTERNS); IPR007087 (PROSITE_PATTERNS); IPR007087 (PROSITE_PROFILES); IPR007087 (PROSITE_PROFILES); IPR007087 (PROSITE_PROFILES); SSF57667 (SUPERFAMILY); SSF57667 (SUPERFAMILY)                                                                                                                                                                                                                                          |
| 1799 | c8052_g1_i1_len_534_path_1_0_510_1076_511_533_3  | 4    | aurora kinase a-like                                                                                                                                                       | 173 | 2.03E-25  | 96.60% | 0.1   | IPR002290 (SMART); IPR000719 (PFAM); G3DSA:1.10.510.10 (GENE3D); IPR030616 (PANTHER); IPR008271 (PROSITE_PATTERNS); IPR000719 (PROSITE_PROFILES); IPR011009 (SUPERFAMILY)                                                                                                                                                                                                                                                                                                                                                                                                                                                                                                                                |
| 1800 | c80640_g1_i1_len_142_path_120_0_141_1            | 0    | retinol dehydrogenase 13-like                                                                                                                                              | 47  | 1.44E-19  | 92.40% | 0.099 | IPR002347 (PRINTS); IPR016040 (G3DSA:3.40.50.GENE3D); PTHR24320 (PANTHER); PTHR24320:SF55 (PANTHER); SSF51735 (SUPERFAMILY)                                                                                                                                                                                                                                                                                                                                                                                                                                                                                                                                                                              |
| 1801 | c8150_g1_i1_len_2436_path_53_0_2435_1            | 137  | carboxypeptidase e                                                                                                                                                         | 812 | 0         | 73.90% | 0.134 | IPR000834 (PRINTS); IPR000834 (SMART); IPR014766 (G3DSA:2.60.40.GENE3D); G3DSA:3.40.630.10 (GENE3D); PF13620 (PFAM); IPR000834 (PFAM); PTHR11532:SF41 (PANTHER); PTHR11532 (PANTHER); IPR000834 (PROSITE_PATTERNS); IPR000834 (PROSITE_PATTERNS); NON_CYTOPLASMIC_DOMAIN (PHOBIUS); TRANSMEMBRANE (PHOBIUS); TRANSMEMBRANE (PHOBIUS); TRANSMEMBRANE (PHOBIUS); NON_CYTOPLASMIC_DOMAIN (PHOBIUS); CYTOPLASMIC_DOMAIN (PHOBIUS); CYTOPLASMIC_DOMAIN (PHOBIUS); IPR008969 (SUPERFAMILY); SSF53187 (SUPERFAMILY); TMhelix (TMHMM)                                                                                                                                                                            |
| 1802 | c82439_g1_i1_len_1193_path_1_0_1192_0            | 34   | endo-beta- -glucanase                                                                                                                                                      | 391 | 7.77E-114 | 72.60% | 0.195 | IPR012341 (G3DSA:1.50.10.GENE3D); IPR001701 (PFAM); PTHR22298 (PANTHER); PTHR22298:SF17 (PANTHER); IPR018221 (PROSITE_PATTERNS); IPR008928 (SUPERFAMILY)                                                                                                                                                                                                                                                                                                                                                                                                                                                                                                                                                 |
| 1803 | c82456_g1_i1_len_535_path_513_0_534_0            | 26   | retinal dehydrogenase 1                                                                                                                                                    | 172 | 2.14E-68  | 89.50% | 0.101 | IPR015590 (PFAM); IPR016163 (G3DSA:3.40.309.GENE3D); PTHR11699 (PANTHER); PTHR11699:SF145 (PANTHER); IPR016161 (SUPERFAMILY)                                                                                                                                                                                                                                                                                                                                                                                                                                                                                                                                                                             |
| 1804 | c82625_g1_i1_len_1833_path_1_0_1832_0            | 120  | laminin subunit alpha                                                                                                                                                      | 605 | 1.68E-130 | 54.60% | 0.132 | IPR001791 (SMART); IPR001791 (PFAM); IPR013320 (G3DSA:2.60.120.GENE3D); IPR013320 (G3DSA:2.60.120.GENE3D); PTHR10574 (PANTHER); PTHR10574:SF39 (PANTHER); IPR001791 (PROSITE_PROFILES); IPR001791 (PROSITE_PROFILES); IPR001791 (PROSITE_PROFILES); IPR013320 (SUPERFAMILY); IPR013320 (SUPERFAMILY)                                                                                                                                                                                                                                                                                                                                                                                                     |
| 1805 | c82725_g1_i1_len_1842_path_7_0_1841_3            | 30   | zinc finger protein zfat-like                                                                                                                                              | 614 | 2.42E-39  | 57.50% | 0.106 | Coil (COILS); IPR015880 (SMART); IPR013087 (G3DSA:3.30.160.GENE3D); PF13894 (PFAM); PF13465 (PFAM); IPR007087 (PFAM); IPR013087 (G3DSA:3.30.160.GENE3D); PTHR24409 (PANTHER); IPR007087 (PROSITE_PATTERNS); IPR007087 (PROSITE_PATTERNS); IPR007087 (PROSITE_PROFILES); IPR007087 (PROSITE_PROFILES); IPR007087 (PROSITE_PROFILES); SSF57667 (SUPERFAMILY); SSF57667 (SUPERFAMILY)                                                                                                                                                                                                                                                                                                                       |
| 1806 | c82743_g1_i1_len_169_path_147_0_168_1            | 144  | midgut chitinase                                                                                                                                                           | 56  | 3.41E-11  | 66.20% | 0.104 | IPR001223 (PFAM); IPR013781 (G3DSA:3.20.20.GENE3D); PTHR11177 (PANTHER); PTHR11177:SF45 (PANTHER); IPR017853 (SUPERFAMILY)                                                                                                                                                                                                                                                                                                                                                                                                                                                                                                                                                                               |
| 1807 | c82774_g1_i1_len_2623_path_10_0_2622_5           | 6061 | heat shock 70 kda protein cognate 3                                                                                                                                        | 868 | 0         | 93.90% | 0.257 | Coil (COILS); Coil (COILS); IPR013126 (PRINTS); IPR029048 (G3DSA:1.20.1270.GENE3D); G3DSA:3.90.640.10 (GENE3D); G3DSA:3.30.30.30 (GENE3D); G3DSA:3.30.420.40 (GENE3D); IPR013126 (PFAM); IPR029047 (G3DSA:2.60.34.GENE3D); G3DSA:3.30.420.40 (GENE3D); PTHR19375:SF157 (PANTHER); PTHR19375 (PANTHER); IPR018181 (PROSITE_PATTERNS); IPR018181 (PROSITE_PATTERNS); IPR018181 (PROSITE_PATTERNS); NON_CYTOPLASMIC_DOMAIN (PHOBIUS); NON_CYTOPLASMIC_DOMAIN (PHOBIUS); CYTOPLASMIC_DOMAIN (PHOBIUS); TRANSMEMBRANE (PHOBIUS); TRANSMEMBRANE (PHOBIUS); IPR029047 (SUPERFAMILY); SSF53067 (SUPERFAMILY); SSF53067 (SUPERFAMILY); IPR029048 (SUPERFAMILY); TMhelix (TMHMM); TMhelix (TMHMM); TMhelix (TMHMM) |

|      |                                          |       |                                                                             |     |           |         |       |                                                                                                                                                                                                                                                                                                                                                                                                                                                                         |
|------|------------------------------------------|-------|-----------------------------------------------------------------------------|-----|-----------|---------|-------|-------------------------------------------------------------------------------------------------------------------------------------------------------------------------------------------------------------------------------------------------------------------------------------------------------------------------------------------------------------------------------------------------------------------------------------------------------------------------|
| 1808 | c82789_g1_i1_len_1219_path_1_0_1218_3    | 24    | alpha- -mannosyl-glycoprotein 4-beta-n-acetylglucosaminyltransferase a-like | 400 | 6.70E-41  | 56.00%  | 0.164 | IPR006759 (PFAM); IPR006759 (PANTHER); PTHR12062:SF5 (PANTHER); NON_CYTOPLASMIC_DOMAIN (PHOBIUS); NON_CYTOPLASMIC_DOMAIN (PHOBIUS); TRANSMEMBRANE (PHOBIUS); TRANSMEMBRANE (PHOBIUS); CYTOPLASMIC_DOMAIN (PHOBIUS); TMhelix (TMHMM)                                                                                                                                                                                                                                     |
| 1809 | c82872_g1_i1_len_1701_path_1679_0_1700_4 | 14    | cold shock protein                                                          | 567 | 5.80E-41  | 99.40%  | 0.113 | IPR002059 (PRINTS); IPR011129 (SMART); IPR012340 (G3DSA:2.40.50.GENE3D); IPR002059 (PFAM); PTHR11544 (PANTHER); IPR019844 (PROSITE_PATTERNS); NON_CYTOPLASMIC_DOMAIN (PHOBIUS); TRANSMEMBRANE (PHOBIUS); CYTOPLASMIC_DOMAIN (PHOBIUS); IPR012340 (SUPERFAMILY)                                                                                                                                                                                                          |
| 1810 | c82944_g1_i1_len_748_path_1_0_747_0      | 6     | l-asparaginase 2                                                            | 250 | 3.37E-161 | 99.00%  | 0.154 | IPR006034 (PRINTS); IPR006034 (SMART); IPR006034 (PIRSF); IPR006034 (PFAM); IPR027474 (G3DSA:3.40.50.GENE3D); PIRSF500176 (PIRSF); IPR004550 (TIGRFAM); PTHR11707 (PANTHER); PTHR11707:SF4 (PANTHER); IPR027475 (PROSITE_PATTERNS); IPR020827 (PROSITE_PATTERNS); TRANSMEMBRANE (PHOBIUS); CYTOPLASMIC_DOMAIN (PHOBIUS); NON_CYTOPLASMIC_DOMAIN (PHOBIUS); IPR006034 (SUPERFAMILY); TMhelix (TMHMM)                                                                     |
| 1811 | c83002_g1_i1_len_538_path_1_0_537_4      | 4     | n-acetylmuramoyl-l-alanine amidase family partial                           | 179 | 4.53E-107 | 100.00% | 0.131 | IPR002508 (SMART); IPR002508 (PFAM); IPR002508 (G3DSA:3.40.630.GENE3D); PTHR30404 (PANTHER); PTHR30404:SF0 (PANTHER); SSF53187 (SUPERFAMILY)                                                                                                                                                                                                                                                                                                                            |
| 1812 | c83042_g1_i1_len_1166_path_1_0_1165_5    | 20    | ras-related protein rab-35                                                  | 388 | 2.62E-128 | 94.70%  | 0.104 | IPR001806 (PRINTS); IPR003579 (SMART); IPR020849 (SMART); IPR024156 (SMART); IPR002041 (SMART); IPR003578 (SMART); IPR005225 (TIGRFAM); IPR027417 (G3DSA:3.40.50.GENE3D); IPR001806 (PFAM); PTHR24073 (PANTHER); PTHR24073:SF428 (PANTHER); PS51419 (PROSITE_PROFILES); IPR027417 (SUPERFAMILY)                                                                                                                                                                         |
| 1813 | c83082_g1_i1_len_979_path_1_0_978_1      | 9     | aael017480- partial                                                         | 326 | 7.49E-68  | 56.50%  | 0.102 | IPR002110 (PRINTS); IPR002110 (SMART); PF13637 (PFAM); IPR020683 (PFAM); IPR020683 (G3DSA:1.25.40.GENE3D); IPR020683 (G3DSA:1.25.40.GENE3D); PTHR24198 (PANTHER); IPR002110 (PROSITE_PROFILES); IPR020683 (PROSITE_PROFILES); IPR020683 (SUPERFAMILY) |
| 1814 | c83202_g1_i1_len_1059_path_1037_0_1058_3 | 17    | lachesin isoform x1                                                         | 353 | 1.03E-80  | 76.50%  | 0.101 | IPR003598 (SMART); PF13895 (PFAM); IPR013783 (G3DSA:2.60.40.GENE3D); IPR013098 (PFAM); PTHR19831:SF43 (PANTHER); PTHR19831 (PANTHER); TRANSMEMBRANE (PHOBIUS); CYTOPLASMIC_DOMAIN (PHOBIUS); TRANSMEMBRANE (PHOBIUS); NON_CYTOPLASMIC_DOMAIN (PHOBIUS); CYTOPLASMIC_DOMAIN (PHOBIUS); IPR007110 (PROSITE_PROFILES); SSF48726 (SUPERFAMILY); SSF48726 (SUPERFAMILY); TMhelix (TMHMM)                                                                                     |
| 1815 | c83295_g1_i1_len_2089_path_2067_0_2088_3 | 36    | maguk p55 subfamily member 7 isoform x4                                     | 697 | 4.36E-179 | 87.30%  | 0.105 | IPR001452 (SMART); IPR008145 (SMART); IPR011511 (PFAM); IPR008145 (PFAM); IPR027417 (G3DSA:3.40.50.GENE3D); G3DSA:3.30.63.10 (GENE3D); G3DSA:2.30.30.40 (GENE3D); PTHR23122:SF14 (PANTHER); PTHR23122 (PANTHER); IPR020590 (PROSITE_PATTERNS); IPR008144 (PROSITE_PROFILES); IPR001452 (PROSITE_PROFILES); IPR001452 (SUPERFAMILY); IPR027417 (SUPERFAMILY)                                                                                                             |
| 1816 | c83425_g1_i1_len_1946_path_1_0_1945_2    | 73    | calcium calmodulin-dependent protein kinase ii isoform a                    | 648 | 0         | 93.60%  | 0.138 | IPR002290 (SMART); IPR000719 (PFAM); IPR013543 (PFAM); G3DSA:3.10.450.50 (GENE3D); G3DSA:1.10.510.10 (GENE3D); G3DSA:3.30.200.20 (GENE3D); IPR020636 (PANTHER); PTHR24347:SF108 (PANTHER); IPR008271 (PROSITE_PATTERNS); IPR017441 (PROSITE_PATTERNS); NON_CYTOPLASMIC_DOMAIN (PHOBIUS); CYTOPLASMIC_DOMAIN (PHOBIUS); TRANSMEMBRANE (PHOBIUS); IPR000719 (PROSITE_PROFILES); SSF54427 (SUPERFAMILY); IPR011009 (SUPERFAMILY)                                           |
| 1817 | c83512_g1_i1_len_927_path_913_0_926_2    | 24306 | translationally controlled tumor protein                                    | 302 | 4.80E-71  | 79.20%  | 0.159 | IPR018105 (PRINTS); IPR018105 (PFAM); IPR011323 (G3DSA:2.170.150.GENE3D); IPR018105 (PANTHER); IPR011057 (SUPERFAMILY)                                                                                                                                                                                                                                                                                                                                                  |



|      |                                                                |    |                                                                |     |           |         |       |                                                                                                                                                                                                                                                                                                                                                                                                                                                                                                                                                                                                                                                                                   |
|------|----------------------------------------------------------------|----|----------------------------------------------------------------|-----|-----------|---------|-------|-----------------------------------------------------------------------------------------------------------------------------------------------------------------------------------------------------------------------------------------------------------------------------------------------------------------------------------------------------------------------------------------------------------------------------------------------------------------------------------------------------------------------------------------------------------------------------------------------------------------------------------------------------------------------------------|
| 1826 | c84306_g1_i1_len_1166_path_1144_0_1165_2                       | 25 | spondin-2 isoform x1                                           | 388 | 9.87E-137 | 80.60%  | 0.109 | IPR009465 (PFAM); PTHR11311 (PANTHER); NON_CYTOPLASMIC_DOMAIN (PHOBIUS); NON_CYTOPLASMIC_DOMAIN (PHOBIUS); TRANSMEMBRANE (PHOBIUS); TRANSMEMBRANE (PHOBIUS); CYTOPLASMIC_DOMAIN (PHOBIUS); IPR009465 (PROSITE_PROFILES)                                                                                                                                                                                                                                                                                                                                                                                                                                                           |
| 1827 | c84356_g1_i1_len_1037_path_1015_0_1036_1                       | 13 | serine threonine-protein kinase plk1-like                      | 346 | 8.47E-142 | 72.20%  | 0.111 | IPR002290 (SMART); IPR000719 (PFAM); G3DSA:1.10.510.10 (GENE3D); G3DSA:3.30.200.20 (GENE3D); PTHR24345 (PANTHER); PTHR24345:SF49 (PANTHER); IPR008271 (PROSITE_PATTERNS); IPR000719 (PROSITE_PROFILES); IPR011009 (SUPERFAMILY)                                                                                                                                                                                                                                                                                                                                                                                                                                                   |
| 1828 | c84477_g1_i1_len_245_path_223_0_244_4                          | 0  | trypsin-like protein                                           | 82  | 6.22E-22  | 66.50%  | 0.111 | IPR001254 (PFAM); G3DSA:2.40.10.10 (GENE3D); PTHR24256 (PANTHER); IPR018114 (PROSITE_PATTERNS); IPR001254 (PROSITE_PROFILES); IPR009003 (SUPERFAMILY)                                                                                                                                                                                                                                                                                                                                                                                                                                                                                                                             |
| 1829 | c84539_g1_i1_len_742_path_18_0_741_4                           | 4  | protein tas                                                    | 247 | 0         | 100.00% | 0.105 | IPR020471 (PRINTS); IPR023210 (PFAM); IPR023210 (G3DSA:3.20.20.GENE3D); IPR001395 (PANTHER); PTHR11732:SF112 (PANTHER); IPR023210 (SUPERFAMILY)                                                                                                                                                                                                                                                                                                                                                                                                                                                                                                                                   |
| 1830 | c8461_g2_i1_len_1381_path_1359_0_1380_0                        | 40 | Agrin                                                          | 461 | 2.59E-06  | 67.00%  | 0.136 | IPR002350 (SMART); IPR002350 (PFAM); G3DSA:3.30.60.30 (GENE3D); NON_CYTOPLASMIC_DOMAIN (PHOBIUS); CYTOPLASMIC_DOMAIN (PHOBIUS); TRANSMEMBRANE (PHOBIUS); TRANSMEMBRANE (PHOBIUS); NON_CYTOPLASMIC_DOMAIN (PHOBIUS); IPR002350 (PROSITE_PROFILES); SSF100895 (SUPERFAMILY); TMhelix (TMHMM); TMhelix (TMHMM)                                                                                                                                                                                                                                                                                                                                                                       |
| 1831 | c84753_g1_i1_len_587_path_609_0_582_25_583_586_1               | 7  | Hyaluronidase                                                  | 196 | 1.20E-31  | 60.90%  | 0.106 | IPR018155 (PFAM); IPR013785 (G3DSA:3.20.20.GENE3D); PTHR11769:SF8 (PANTHER); IPR018155 (PANTHER); IPR017853 (SUPERFAMILY)                                                                                                                                                                                                                                                                                                                                                                                                                                                                                                                                                         |
| 1832 | c84812_g1_i1_len_778_path_1_0_777_3                            | 8  | d-alanyl-d-alanine carboxypeptidase                            | 260 | 1.87E-119 | 100.00% | 0.104 | IPR012907 (SMART); IPR012338 (G3DSA:3.40.710.GENE3D); IPR012907 (PFAM); IPR001967 (PFAM); IPR012907 (G3DSA:2.60.410.GENE3D); PTHR21581:SF3 (PANTHER); PTHR21581 (PANTHER); IPR012338 (SUPERFAMILY); IPR015956 (SUPERFAMILY)                                                                                                                                                                                                                                                                                                                                                                                                                                                       |
| 1833 | c84885_g1_i1_len_1045_path_1023_0_1044_2                       | 15 | mesencephalic astrocyte-derived neurotrophic factor homolog    | 348 | 6.57E-77  | 84.70%  | 0.166 | IPR019345 (PFAM); IPR011001 (G3DSA:1.10.225.GENE3D); PTHR12990 (PANTHER); PTHR12990:SF5 (PANTHER); CYTOPLASMIC_DOMAIN (PHOBIUS); NON_CYTOPLASMIC_DOMAIN (PHOBIUS); TRANSMEMBRANE (PHOBIUS); SSF68906 (SUPERFAMILY); TMhelix (TMHMM)                                                                                                                                                                                                                                                                                                                                                                                                                                               |
| 1834 | c84914_g1_i1_len_354_path_332_0_353_4                          | 2  | partial                                                        | 112 | 1.82E-54  | 82.60%  | 0.119 | IPR000997 (PRINTS); IPR029058 (G3DSA:3.40.50.GENE3D); IPR002018 (PFAM); PTHR11559:SF154 (PANTHER); PTHR11559 (PANTHER); IPR019819 (PROSITE_PATTERNS); IPR029058 (SUPERFAMILY)                                                                                                                                                                                                                                                                                                                                                                                                                                                                                                     |
| 1835 | c84923_g1_i1_len_569_path_1_0_568_0                            | 3  | glycosyl hydrolases 31 family protein                          | 190 | 2.51E-130 | 99.00%  | 0.1   | IPR025887 (PFAM); IPR000322 (PFAM); PTHR22762 (PANTHER); PTHR22762:SF38 (PANTHER); IPR017853 (SUPERFAMILY); IPR011013 (SUPERFAMILY)                                                                                                                                                                                                                                                                                                                                                                                                                                                                                                                                               |
| 1836 | c84977_g1_i1_len_238_path_216_0_237_3                          | 0  | polypeptide n-acetylgalactosaminyltransferase 2-like           | 80  | 1.29E-35  | 83.10%  | 0.185 | IPR000772 (PFAM); G3DSA:2.80.10.50 (GENE3D); PTHR11675 (PANTHER); PTHR11675:SF24 (PANTHER); IPR000772 (PROSITE_PROFILES); IPR000772 (SUPERFAMILY)                                                                                                                                                                                                                                                                                                                                                                                                                                                                                                                                 |
| 1837 | c85049_g1_i1_len_1527_path_1_0_1526_5                          | 49 | purple acid phosphatase                                        | 509 | 0         | 74.40%  | 0.11  | IPR025733 (PFAM); IPR004843 (PFAM); IPR029052 (G3DSA:3.60.21.GENE3D); IPR015914 (G3DSA:2.60.40.GENE3D); PTHR22953:SF9 (PANTHER); PTHR22953 (PANTHER); IPR008963 (SUPERFAMILY); IPR029052 (SUPERFAMILY)                                                                                                                                                                                                                                                                                                                                                                                                                                                                            |
| 1838 | c85090_g1_i1_len_2708_path_2728_0_2707_2                       | 81 | malonyl -acyl carrier protein transacylase                     | 902 | 0         | 97.80%  | 0.107 | IPR002198 (PRINTS); IPR002347 (PRINTS); IPR020801 (SMART); IPR013968 (SMART); IPR002198 (PFAM); IPR003231 (TIGRFAM); IPR009081 (G3DSA:1.10.1200.GENE3D); IPR004410 (TIGRFAM); IPR014043 (PFAM); IPR016038 (G3DSA:3.40.47.GENE3D); IPR001227 (G3DSA:3.40.366.GENE3D); IPR016040 (G3DSA:3.40.50.GENE3D); G3DSA:3.30.70.250 (GENE3D); IPR014030 (PFAM); IPR011284 (TIGRFAM); IPR009081 (PFAM); PTHR24312:SF0 (PANTHER); PTHR24312 (PANTHER); IPR006162 (PROSITE_PATTERNS); IPR020904 (PROSITE_PATTERNS); IPR009081 (PROSITE_PROFILES); IPR003231 (HAMAP); IPR016036 (SUPERFAMILY); IPR016039 (SUPERFAMILY); IPR009081 (SUPERFAMILY); IPR016035 (SUPERFAMILY); SSF51735 (SUPERFAMILY) |
| 1839 | c8533_g1_i1_len_956_path_1018_0_383_1401_3_84_401_43_402_955_0 | 40 | mitochondrial import inner membrane translocase subunit tim8 a | 312 | 4.51E-31  | 80.90%  | 0.209 | IPR004217 (PFAM); IPR006966 (PFAM); IPR004217 (G3DSA:1.10.287.GENE3D); PTHR21535 (PANTHER); TRANSMEMBRANE (PHOBIUS); NON_CYTOPLASMIC_DOMAIN (PHOBIUS); CYTOPLASMIC_DOMAIN (PHOBIUS); NON_CYTOPLASMIC_DOMAIN (PHOBIUS); CYTOPLASMIC_DOMAIN (PHOBIUS); TRANSMEMBRANE (PHOBIUS); TRANSMEMBRANE (PHOBIUS); TRANSMEMBRANE (PHOBIUS); IPR004217 (SUPERFAMILY)                                                                                                                                                                                                                                                                                                                           |

|      |                                              |      |                                         |     |           |        |       |                                                                                                                                                                                                                                                                                                                                                                                                                                                                                                                                                                       |
|------|----------------------------------------------|------|-----------------------------------------|-----|-----------|--------|-------|-----------------------------------------------------------------------------------------------------------------------------------------------------------------------------------------------------------------------------------------------------------------------------------------------------------------------------------------------------------------------------------------------------------------------------------------------------------------------------------------------------------------------------------------------------------------------|
| 1840 | c85377_g1_i1_len_2711_path_2689_0_2710_3     | 51   | ankyrin repeat protein                  | 904 | 1.34E-39  | 54.60% | 0.141 | IPR002110 (PRINTS); IPR002110 (SMART); IPR002110 (PFAM); IPR020683 (G3DSA:1.25.40.GENE3D); IPR020683 (G3DSA:1.25.40.GENE3D); IPR020683 (G3DSA:1.25.40.GENE3D); IPR020683 (PFAM); PTHR24198 (PANTHER); NON_CYTOPLASMIC_DOMAIN (PHOBIUS); TRANSMEMBRANE (PHOBIUS); CYTOPLASMIC_DOMAIN (PHOBIUS); TRANSMEMBRANE (PHOBIUS); NON_CYTOPLASMIC_DOMAIN (PHOBIUS); IPR002110 (PROSITE_PROFILES); IPR002110 (PROSITE_PROFILES); IPR002110 (PROSITE_PROFILES); IPR002110 (PROSITE_PROFILES); IPR002110 (PROSITE_PROFILES); IPR002110 (PROSITE_PROFILES); IPR020683 (SUPERFAMILY) |
| 1841 | c85451_g1_i1_len_787_path_765_0_786_1        | 14   | dnaj homolog subfamily c member 21-like | 262 | 4.28E-122 | 83.80% | 0.122 | Coil (COILS); Coil (COILS); IPR001623 (PRINTS); IPR001623 (SMART); IPR001623 (G3DSA:1.10.287.GENE3D); IPR001623 (PFAM); PTHR24078:SF150 (PANTHER); PTHR24078 (PANTHER); IPR018253 (PROSITE_PATTERNS); IPR001623 (PROSITE_PROFILES); IPR001623 (SUPERFAMILY)                                                                                                                                                                                                                                                                                                           |
| 1842 | c85493_g2_i1_len_571_path_454_0_570_5        | 3    | c4b-binding protein beta chain          | 190 | 9.90E-25  | 81.10% | 0.126 | IPR000436 (SMART); G3DSA:2.10.70.10 (GENE3D); IPR000436 (PFAM); PTHR19325 (PANTHER); PTHR19325:SF340 (PANTHER); IPR000436 (PROSITE_PROFILES); IPR000436 (SUPERFAMILY)                                                                                                                                                                                                                                                                                                                                                                                                 |
| 1843 | c85572_g1_i1_len_1317_path_1_0_1316_5        | 41   | glucose dehydrogenase                   | 439 | 1.01E-39  | 81.10% | 0.127 | G3DSA:3.30.560.10 (GENE3D); IPR007867 (PFAM); G3DSA:3.50.50.60 (GENE3D); PTHR11552:SF68 (PANTHER); PTHR11552 (PANTHER); NON_CYTOPLASMIC_DOMAIN (PHOBIUS); CYTOPLASMIC_DOMAIN (PHOBIUS); TRANSMEMBRANE (PHOBIUS); SSF54373 (SUPERFAMILY); SSF51905 (SUPERFAMILY)                                                                                                                                                                                                                                                                                                       |
| 1844 | c85584_g1_i1_len_1327_path_14_0_1326_2       | 20   | dnaj homolog subfamily b member 9       | 442 | 4.05E-61  | 56.30% | 0.201 | Coil (COILS); IPR001623 (PRINTS); IPR001623 (SMART); IPR001623 (PFAM); IPR001623 (G3DSA:1.10.287.GENE3D); PTHR24077 (PANTHER); IPR018253 (PROSITE_PATTERNS); TRANSMEMBRANE (PHOBIUS); CYTOPLASMIC_DOMAIN (PHOBIUS); NON_CYTOPLASMIC_DOMAIN (PHOBIUS); IPR001623 (PROSITE_PROFILES); IPR001623 (SUPERFAMILY)                                                                                                                                                                                                                                                           |
| 1845 | c85681_g1_i1_len_642_path_620_0_641_5        | 4    | membrane partial                        | 214 | 2.20E-137 | 99.00% | 0.097 | IPR012332 (G3DSA:2.160.20.GENE3D)                                                                                                                                                                                                                                                                                                                                                                                                                                                                                                                                     |
| 1846 | c86034_g1_i1_len_1455_path_1_0_1454_4        | 32   | thioredoxin domain-containing protein 5 | 485 | 3.35E-35  | 70.50% | 0.113 | PR00421 (PRINTS); IPR013766 (PFAM); IPR012336 (G3DSA:3.40.30.GENE3D); PTHR18929 (PANTHER); IPR017937 (PROSITE_PATTERNS); IPR012336 (PROSITE_PROFILES); IPR012336 (SUPERFAMILY)                                                                                                                                                                                                                                                                                                                                                                                        |
| 1847 | c86044_g1_i1_len_1256_path_1234_0_1255_2     | 45   | activated cdc42 kinase 1 isoform x2     | 418 | 0         | 80.50% | 0.108 | IPR001245 (PRINTS); IPR020635 (SMART); G3DSA:1.10.510.10 (GENE3D); IPR001245 (PFAM); G3DSA:3.30.200.20 (GENE3D); G3DSA:2.30.30.40 (GENE3D); IPR030220 (PTHR24418:PANTHER); PTHR24418 (PANTHER); IPR017441 (PROSITE_PATTERNS); IPR008266 (PROSITE_PATTERNS); IPR000719 (PROSITE_PROFILES); IPR011009 (SUPERFAMILY)                                                                                                                                                                                                                                                     |
| 1848 | c8612_g1_i1_len_430_path_81_0_61_80_62_429_0 | 895  | 60s acidic ribosomal protein p1         | 144 | 5.09E-31  | 93.40% | 0.19  | PF00428 (PFAM); PTHR21141 (PANTHER); IPR027534 (HAMAP)                                                                                                                                                                                                                                                                                                                                                                                                                                                                                                                |
| 1849 | c8612_g1_i2_len_405_path_43_0_36_80_37_404_2 | 1365 | 60s acidic ribosomal protein p1         | 135 | 4.92E-31  | 92.80% | 0.213 | PF00428 (PFAM); PTHR21141 (PANTHER); IPR027534 (HAMAP)                                                                                                                                                                                                                                                                                                                                                                                                                                                                                                                |
| 1850 | c86163_g1_i1_len_398_path_1_0_397_5          | 7    | vesicle-fusing atpase 1                 | 132 | 2.29E-72  | 90.40% | 0.103 | IPR003959 (PFAM); IPR027417 (G3DSA:3.40.50.GENE3D); PTHR23078 (PANTHER); IPR027417 (SUPERFAMILY)                                                                                                                                                                                                                                                                                                                                                                                                                                                                      |
| 1851 | c86292_g1_i1_len_893_path_871_0_892_1        | 10   | dnaj homolog subfamily c member 11      | 298 | 4.30E-139 | 81.80% | 0.102 | IPR001623 (PRINTS); IPR001623 (SMART); IPR001623 (PFAM); IPR001623 (G3DSA:1.10.287.GENE3D); PTHR24078 (PANTHER); PTHR24078:SF159 (PANTHER); IPR001623 (PROSITE_PROFILES); IPR001623 (SUPERFAMILY)                                                                                                                                                                                                                                                                                                                                                                     |
| 1852 | c86316_g1_i1_len_605_path_583_0_604_0        | 7    | lipophorin receptor                     | 202 | 8.95E-111 | 86.20% | 0.105 | IPR000033 (SMART); IPR011042 (G3DSA:2.120.10.GENE3D); IPR000033 (PFAM); PTHR10529:SF208 (PANTHER); PTHR10529 (PANTHER); IPR000033 (PROSITE_PROFILES); IPR000033 (PROSITE_PROFILES); IPR000033 (PROSITE_PROFILES); IPR000033 (PROSITE_PROFILES); IPR000033 (PROSITE_PROFILES); SSF63825 (SUPERFAMILY)                                                                                                                                                                                                                                                                  |
| 1853 | c86389_g1_i1_len_826_path_1_0_825_4          | 8    | protein fem-1 homolog cg6966 isoform x1 | 275 | 3.91E-85  | 89.80% | 0.337 | IPR002110 (PRINTS); IPR002110 (SMART); IPR020683 (G3DSA:1.25.40.GENE3D); IPR020683 (G3DSA:1.25.40.GENE3D); IPR020683 (PFAM); IPR002110 (PFAM); PTHR24173 (PANTHER); PTHR24173:SF15 (PANTHER); IPR002110 (PROSITE_PROFILES); IPR020683 (PROSITE_PROFILES); IPR002110 (PROSITE_PROFILES); IPR002110 (PROSITE_PROFILES); IPR020683 (SUPERFAMILY)                                                                                                                                                                                                                         |
| 1854 | c86497_g1_i1_len_262_path_240_0_261_4        | 0    | endothelin-converting enzyme 1-like     | 81  | 5.98E-20  | 83.60% | 0.121 | IPR018497 (PFAM); IPR024079 (G3DSA:3.40.390.GENE3D); IPR000718 (PANTHER); PTHR11733:SF110 (PANTHER); SSF55486 (SUPERFAMILY)                                                                                                                                                                                                                                                                                                                                                                                                                                           |



|      |                                                             |       |                                                                            |     |           |        |         |                                                                                                                                                                                                                                                                                                                                                                                                                                                                                                                                                                                                    |
|------|-------------------------------------------------------------|-------|----------------------------------------------------------------------------|-----|-----------|--------|---------|----------------------------------------------------------------------------------------------------------------------------------------------------------------------------------------------------------------------------------------------------------------------------------------------------------------------------------------------------------------------------------------------------------------------------------------------------------------------------------------------------------------------------------------------------------------------------------------------------|
| 1855 | c86636_g1_i1_len_1130_path_1_0_1129_0                       | 32    | transforming growth factor-beta-induced protein ig-h3-like                 | 377 | 4.24E-41  | 52.80% | 0.351 Y | IPR000782 (SMART); IPR000782 (G3DSA:2.30.180.GENE3D); IPR000782 (PFAM); IPR000782 (G3DSA:2.30.180.GENE3D); PTHR10900 (PANTHER); IPR000782 (PROSITE_PROFILES); IPR000782 (PROSITE_PROFILES); IPR000782 (SUPERFAMILY); IPR000782 (SUPERFAMILY)                                                                                                                                                                                                                                                                                                                                                       |
| 1856 | c86799_g1_i1_len_1265_path_1_0_1264_1                       | 116   | leucine-rich repeat and calponin homology domain-containing protein 1-like | 417 | 7.11E-120 | 65.60% | 0.1     | IPR003591 (SMART); SM00364 (SMART); IPR001611 (PFAM); IPR001611 (PFAM); IPR001611 (PFAM); G3DSA:3.80.10.10 (GENE3D); PTHR23155 (PANTHER); PTHR23155:SF423 (PANTHER); IPR001611 (PROSITE_PROFILES); IPR001611 (PROSITE_PROFILES); IPR001611 (PROSITE_PROFILES); IPR001611 (PROSITE_PROFILES); IPR001611 (PROSITE_PROFILES); IPR001611 (PROSITE_PROFILES); SSF52058 (SUPERFAMILY)                                                                                                                                                                                                                    |
| 1857 | c86807_g1_i1_len_2146_path_1_0_2145_2                       | 25    | sel1 repeat family protein                                                 | 715 | 2.67E-140 | 98.70% | 0.102   | IPR006597 (SMART); IPR011990 (G3DSA:1.25.40.GENE3D); IPR006597 (PFAM); PTHR11102 (PANTHER); NON_CYTOPLASMIC_DOMAIN (PHOBIUS); TRANSMEMBRANE (PHOBIUS); CYTOPLASMIC_DOMAIN (PHOBIUS); SSF81901 (SUPERFAMILY); TMhelix (TMHMM)                                                                                                                                                                                                                                                                                                                                                                       |
| 1858 | c86935_g1_i1_len_505_path_483_0_504_3                       | 5     | 50-kda dystrophin-associated glycoprotein                                  | 169 | 5.16E-15  | 67.30% | 0.117   | IPR008908 (PFAM); IPR016186 (G3DSA:3.10.100.GENE3D); IPR013783 (G3DSA:2.60.40.GENE3D); PTHR10132:SF14 (PANTHER); IPR008908 (PANTHER); IPR016187 (SUPERFAMILY)                                                                                                                                                                                                                                                                                                                                                                                                                                      |
| 1859 | c86969_g1_i1_len_1946_path_1_0_1945_4                       | 649   | peptidylglycine alpha-hydroxylating monooxygenase                          | 642 | 2.45E-167 | 78.10% | 0.136   | IPR000720 (PRINTS); PF03712 (PFAM); IPR000323 (PFAM); IPR014784 (G3DSA:2.60.120.GENE3D); IPR000323 (G3DSA:2.60.120.GENE3D); PTHR10680 (PANTHER); IPR014783 (PROSITE_PATTERNS); CYTOPLASMIC_DOMAIN (PHOBIUS); TRANSMEMBRANE (PHOBIUS); TRANSMEMBRANE (PHOBIUS); TRANSMEMBRANE (PHOBIUS); NON_CYTOPLASMIC_DOMAIN (PHOBIUS); NON_CYTOPLASMIC_DOMAIN (PHOBIUS); NON_CYTOPLASMIC_DOMAIN (PHOBIUS); CYTOPLASMIC_DOMAIN (PHOBIUS); TRANSMEMBRANE (PHOBIUS); IPR008977 (SUPERFAMILY); IPR008977 (SUPERFAMILY); IPR008977 (SUPERFAMILY); TMhelix (TMHMM); TMhelix (TMHMM); TMhelix (TMHMM); TMhelix (TMHMM) |
| 1860 | c87070_g1_i1_len_704_path_682_0_703_0                       | 15    | xanthine dehydrogenase                                                     | 235 | 4.53E-66  | 69.10% | 0.113   | IPR002346 (PFAM); IPR016167 (G3DSA:3.30.43.GENE3D); IPR016169 (G3DSA:3.30.465.GENE3D); PTHR11908 (PANTHER); PTHR11908:SF32 (PANTHER); IPR016166 (PROSITE_PROFILES); IPR016166 (SUPERFAMILY)                                                                                                                                                                                                                                                                                                                                                                                                        |
| 1861 | c87110_g1_i1_len_487_path_465_0_486_4                       | 9     | partial                                                                    | 162 | 6.86E-16  | 66.60% | 0.105   | G3DSA:2.40.10.10 (GENE3D); IPR001254 (PFAM); PTHR24276 (PANTHER); IPR009003 (SUPERFAMILY)                                                                                                                                                                                                                                                                                                                                                                                                                                                                                                          |
| 1862 | c87211_g1_i1_len_750_path_1_0_749_5                         | 38    | peptidyl-prolyl cis-trans isomerase-like 6                                 | 244 | 2.07E-17  | 62.60% | 0.109   | IPR002130 (PFAM); IPR029000 (G3DSA:2.40.100.GENE3D); PTHR11071:SF210 (PANTHER); IPR024936 (PANTHER); IPR002130 (PROSITE_PROFILES); IPR029000 (SUPERFAMILY)                                                                                                                                                                                                                                                                                                                                                                                                                                         |
| 1863 | c87222_g1_i1_len_2483_path_2485_0_2482_0                    | 138   | 12 kda fk506-binding protein                                               | 828 | 1.20E-59  | 90.10% | 0.245   | IPR001179 (PFAM); G3DSA:3.10.50.40 (GENE3D); IPR023566 (PANTHER); PTHR10516:SF272 (PANTHER); CYTOPLASMIC_DOMAIN (PHOBIUS); NON_CYTOPLASMIC_DOMAIN (PHOBIUS); TRANSMEMBRANE (PHOBIUS); IPR001179 (PROSITE_PROFILES); SSF54534 (SUPERFAMILY); TMhelix (TMHMM)                                                                                                                                                                                                                                                                                                                                        |
| 1864 | c87385_g1_i1_len_1357_path_1335_0_1356_2                    | 20    | early growth response                                                      | 452 | 2.17E-82  | 67.90% | 0.099   | IPR015880 (SMART); PF13465 (PFAM); IPR013087 (G3DSA:3.30.160.GENE3D); IPR013087 (G3DSA:3.30.160.GENE3D); PTHR23223 (PANTHER); PTHR23223:SF80 (PANTHER); IPR007087 (PROSITE_PATTERNS); IPR007087 (PROSITE_PATTERNS); IPR007087 (PROSITE_PATTERNS); IPR007087 (PROSITE_PROFILES); IPR007087 (PROSITE_PROFILES); IPR007087 (PROSITE_PROFILES); SSF57667 (SUPERFAMILY); SSF57667 (SUPERFAMILY)                                                                                                                                                                                                         |
| 1865 | c877_g1_i1_len_1015_path_1_0_724_726_725_734_736_735_1014_0 | 17641 | anti-lipopolysaccharide factor                                             | 327 | 3.36E-33  | 68.90% | 0.316   | IPR024509 (PFAM); NON_CYTOPLASMIC_DOMAIN (PHOBIUS); TRANSMEMBRANE (PHOBIUS); CYTOPLASMIC_DOMAIN (PHOBIUS); IPR024716 (PRODOM); TMhelix (TMHMM)                                                                                                                                                                                                                                                                                                                                                                                                                                                     |
| 1866 | c87854_g1_i1_len_807_path_785_0_806_5                       | 7     | hydroxymethylpyrimidine phosphomethylpyrimidine kinase                     | 269 | 3.21E-162 | 99.90% | 0.105   | IPR004399 (TIGRFAM); IPR029056 (G3DSA:3.40.1190.GENE3D); IPR013749 (PFAM); PTHR20858 (PANTHER); PTHR20858:SF17 (PANTHER); IPR029056 (SUPERFAMILY)                                                                                                                                                                                                                                                                                                                                                                                                                                                  |
| 1867 | c88048_g1_i1_len_684_path_1_0_683_0                         | 5     | leucine-rich repeat-containing protein 70 isoform x1                       | 228 | 2.50E-07  | 53.14% | 0.106   | G3DSA:3.80.10.10 (GENE3D); PTHR24369 (PANTHER); SSF52058 (SUPERFAMILY)                                                                                                                                                                                                                                                                                                                                                                                                                                                                                                                             |
| 1868 | c88158_g1_i1_len_265_path_1_0_264_1                         | 0     | ---NA---                                                                   | 88  |           |        | 0.15    | PTHR22878 (PANTHER)                                                                                                                                                                                                                                                                                                                                                                                                                                                                                                                                                                                |

[illegible]

[illegible]

|      |                                                                                                    |     |                                                       |     |           |        |       |   |                                                                                                                                                                                                                                                                                                                                                                                                                                                                                                                                                                                                                                                                                                                                                                                           |
|------|----------------------------------------------------------------------------------------------------|-----|-------------------------------------------------------|-----|-----------|--------|-------|---|-------------------------------------------------------------------------------------------------------------------------------------------------------------------------------------------------------------------------------------------------------------------------------------------------------------------------------------------------------------------------------------------------------------------------------------------------------------------------------------------------------------------------------------------------------------------------------------------------------------------------------------------------------------------------------------------------------------------------------------------------------------------------------------------|
| 1889 | c90144_g1_i1_len_972_path_950_0_971_3                                                              | 13  | balbiani ring protein 3                               | 324 | 2.71E-18  | 49.70% | 0.666 | Y | IPR000072 (SMART); IPR000072 (PFAM); IPR004153 (PFAM); IPR029034 (G3DSA:2.10.90.GENE3D); PTHR11633:SF1 (PANTHER); PTHR11633 (PANTHER); CYTOPLASMIC_DOMAIN (PHOBIUS); SIGNAL_PEPTIDE_N_REGION (PHOBIUS); SIGNAL_PEPTIDE (PHOBIUS); SIGNAL_PEPTIDE_H_REGION (PHOBIUS); TRANSMEMBRANE (PHOBIUS); SIGNAL_PEPTIDE_C_REGION (PHOBIUS); NON_CYTOPLASMIC_DOMAIN (PHOBIUS); IPR000072 (PROSITE_PROFILES); SignalP-noTM (SIGNALP_EUK); SignalP-noTM (SIGNALP_GRAM_NEGATIVE); IPR029034 (SUPERFAMILY); TMhelix (TMHMM)                                                                                                                                                                                                                                                                               |
| 1890 | c9018_g2_i4_len_2303_path_3441_0_1746_655_1747_1770_5211_1771_1901_502_1902_1925_5_365_1926_2302_0 | 96  | cation channel sperm-associated protein subunit gamma | 768 | 2.14E-09  | 49.67% | 0.112 |   | NON_CYTOPLASMIC_DOMAIN (PHOBIUS); TRANSMEMBRANE (PHOBIUS); CYTOPLASMIC_DOMAIN (PHOBIUS); TRANSMEMBRANE (PHOBIUS); NON_CYTOPLASMIC_DOMAIN (PHOBIUS); TRANSMEMBRANE (PHOBIUS); CYTOPLASMIC_DOMAIN (PHOBIUS); TMhelix (TMHMM); TMhelix (TMHMM)                                                                                                                                                                                                                                                                                                                                                                                                                                                                                                                                               |
| 1891 | c9018_g2_i4_len_2303_path_3441_0_1746_655_1747_1770_5211_1771_1901_502_1902_1925_5_365_1926_2302_1 | 96  | cation channel sperm-associated protein subunit gamma | 768 | 7.64E-10  | 52.50% | 0.189 |   | Coil (COILS); CYTOPLASMIC_DOMAIN (PHOBIUS); NON_CYTOPLASMIC_DOMAIN (PHOBIUS); TRANSMEMBRANE (PHOBIUS); TRANSMEMBRANE (PHOBIUS); TRANSMEMBRANE (PHOBIUS); TRANSMEMBRANE (PHOBIUS); NON_CYTOPLASMIC_DOMAIN (PHOBIUS); CYTOPLASMIC_DOMAIN (PHOBIUS); TRANSMEMBRANE (PHOBIUS); CYTOPLASMIC_DOMAIN (PHOBIUS); TRANSMEMBRANE (PHOBIUS); NON_CYTOPLASMIC_DOMAIN (PHOBIUS); NON_CYTOPLASMIC_DOMAIN (PHOBIUS); TMhelix (TMHMM); TRANSMEMBRANE (PHOBIUS); TRANSMEMBRANE (PHOBIUS); CYTOPLASMIC_DOMAIN (PHOBIUS); NON_CYTOPLASMIC_DOMAIN (PHOBIUS); NON_CYTOPLASMIC_DOMAIN (PHOBIUS); CYTOPLASMIC_DOMAIN (PHOBIUS); TRANSMEMBRANE (PHOBIUS); TMhelix (TMHMM); TMhelix (TMHMM); TMhelix (TMHMM) |
| 1892 | c9018_g2_i4_len_2303_path_3441_0_1746_655_1747_1770_5211_1771_1901_502_1902_1925_5_365_1926_2302_2 | 96  | ribosome-binding protein 1 isoform x1                 | 767 | 6.18E-13  | 55.22% | 0.12  |   | TRANSMEMBRANE (PHOBIUS); TRANSMEMBRANE (PHOBIUS); CYTOPLASMIC_DOMAIN (PHOBIUS); NON_CYTOPLASMIC_DOMAIN (PHOBIUS); NON_CYTOPLASMIC_DOMAIN (PHOBIUS); CYTOPLASMIC_DOMAIN (PHOBIUS); TRANSMEMBRANE (PHOBIUS); TMhelix (TMHMM); TMhelix (TMHMM); TMhelix (TMHMM)                                                                                                                                                                                                                                                                                                                                                                                                                                                                                                                              |
| 1893 | c90181_g1_i1_len_815_path_793_0_814_0                                                              | 14  | neprilysin 2 isoform x3                               | 272 | 5.09E-104 | 72.00% | 0.1   |   | IPR018497 (PRINTS); IPR024079 (G3DSA:3.40.390.GENE3D); IPR018497 (PFAM); PTHR11733:SF113 (PANTHER); IPR000718 (PANTHER); SSF55486 (SUPERFAMILY)                                                                                                                                                                                                                                                                                                                                                                                                                                                                                                                                                                                                                                           |
| 1894 | c9036_g1_i2_len_1820_path_1_0_1371_1373_1372_1399_2900_1400_1493_1429_1494_1503_30_03_1504_1819_2  | 40  | repetitive proline-rich cell wall protein 2-like      | 606 | 5.53E-11  | 50.50% | 0.136 |   | no IPS match                                                                                                                                                                                                                                                                                                                                                                                                                                                                                                                                                                                                                                                                                                                                                                              |
| 1895 | c90564_g1_i1_len_990_path_968_0_989_4                                                              | 29  | serine protease easter                                | 330 | 1.59E-33  | 60.50% | 0.1   |   | IPR001314 (PRINTS); IPR001254 (SMART); IPR001254 (PFAM); G3DSA:2.40.10.10 (GENE3D); G3DSA:2.40.10.10 (GENE3D); PTHR24268:SF81 (PANTHER); PTHR24268 (PANTHER); IPR018114 (PROSITE_PATTERNS); IPR001254 (PROSITE_PROFILES); IPR009003 (SUPERFAMILY)                                                                                                                                                                                                                                                                                                                                                                                                                                                                                                                                         |
| 1896 | c9086_g1_i1_len_1025_path_1_0_493_495_494_1024_0                                                   | 39  | abl interactor 2-like                                 | 336 | 2.31E-34  | 94.80% | 0.1   |   | IPR001452 (PRINTS); IPR001452 (SMART); IPR001452 (PFAM); G3DSA:2.30.30.40 (GENE3D); IPR028457 (PANTHER); TRANSMEMBRANE (PHOBIUS); CYTOPLASMIC_DOMAIN (PHOBIUS); NON_CYTOPLASMIC_DOMAIN (PHOBIUS); IPR001452 (PROSITE_PROFILES); IPR001452 (SUPERFAMILY)                                                                                                                                                                                                                                                                                                                                                                                                                                                                                                                                   |
| 1897 | c90934_g1_i1_len_516_path_494_0_515_1                                                              | 9   | sortilin-related receptor                             | 172 | 2.03E-18  | 77.30% | 0.106 |   | G3DSA:2.130.10.140 (GENE3D); PTHR12106:SF7 (PANTHER); PTHR12106 (PANTHER); SSF110296 (SUPERFAMILY)                                                                                                                                                                                                                                                                                                                                                                                                                                                                                                                                                                                                                                                                                        |
| 1898 | c90969_g1_i1_len_525_path_1_0_524_3                                                                | 10  | peroxiredoxin 1                                       | 175 | 3.81E-60  | 91.70% | 0.119 |   | IPR000866 (PFAM); IPR019479 (PFAM); IPR012336 (G3DSA:3.40.30.GENE3D); PTHR10681 (PANTHER); PTHR10681:SF101 (PANTHER); TRANSMEMBRANE (PHOBIUS); NON_CYTOPLASMIC_DOMAIN (PHOBIUS); TRANSMEMBRANE (PHOBIUS); CYTOPLASMIC_DOMAIN (PHOBIUS); CYTOPLASMIC_DOMAIN (PHOBIUS); IPR012336 (SUPERFAMILY); TMhelix (TMHMM); TMhelix (TMHMM)                                                                                                                                                                                                                                                                                                                                                                                                                                                           |
| 1899 | c9130_g1_i1_len_1626_path_1599_0_804_801_805_828_825_829_1625_4                                    | 134 | pdz domain-containing protein 11                      | 542 | 3.73E-50  | 76.80% | 0.105 |   | IPR001478 (SMART); IPR001478 (PFAM); IPR001478 (G3DSA:2.30.42.GENE3D); PTHR14063 (PANTHER); IPR001478 (PROSITE_PROFILES); IPR001478 (SUPERFAMILY)                                                                                                                                                                                                                                                                                                                                                                                                                                                                                                                                                                                                                                         |
| 1900 | c9193_g1_i1_len_1915_path_1893_0_998_2892_999_1914_0                                               | 56  | tyrosine-protein phosphatase 69d-like                 | 639 | 3.07E-157 | 79.70% | 0.133 |   | IPR000242 (PRINTS); IPR000242 (SMART); IPR003595 (SMART); IPR000242 (PFAM); IPR029021 (G3DSA:3.90.190.GENE3D); IPR029021 (G3DSA:3.90.190.GENE3D); PTHR19134:SF277 (PANTHER); PTHR19134 (PANTHER); TRANSMEMBRANE (PHOBIUS); NON_CYTOPLASMIC_DOMAIN (PHOBIUS); CYTOPLASMIC_DOMAIN (PHOBIUS); IPR000387 (PROSITE_PROFILES); IPR000242 (PROSITE_PROFILES); IPR000242 (PROSITE_PROFILES); IPR000387 (PROSITE_PROFILES); IPR029021 (SUPERFAMILY); IPR029021 (SUPERFAMILY)                                                                                                                                                                                                                                                                                                                       |

|      |                                                      |     |                                             |     |           |        |         |                                                                                                                                                                                                                                                                                                                                                                                                                                                                                                                             |
|------|------------------------------------------------------|-----|---------------------------------------------|-----|-----------|--------|---------|-----------------------------------------------------------------------------------------------------------------------------------------------------------------------------------------------------------------------------------------------------------------------------------------------------------------------------------------------------------------------------------------------------------------------------------------------------------------------------------------------------------------------------|
| 1901 | c91971_g1_i1_len_483_path_461_0_482_3                | 2   | kda midgut protein                          | 155 | 6.12E-22  | 57.40% | 0.261   | SIGNAL_PEPTIDE_C_REGION (PHOBIUS); SIGNAL_PEPTIDE_N_REGION (PHOBIUS); NON_CYTOPLASMIC_DOMAIN (PHOBIUS); SIGNAL_PEPTIDE (PHOBIUS); SIGNAL_PEPTIDE_H_REGION (PHOBIUS); TMhelix (TMHMM)                                                                                                                                                                                                                                                                                                                                        |
| 1902 | c9203_g1_i1_len_1457_path_1_0_547_549_548_1456_3     | 151 | leucine-rich repeat protein 1 isoform x2    | 486 | 2.42E-120 | 64.10% | 0.263   | PR00019 (PRINTS); IPR003591 (SMART); IPR001611 (PFAM); G3DSA:3.80.10.10 (GENE3D); PTHR23155 (PANTHER); IPR001611 (PROSITE_PROFILES); IPR001611 (PROSITE_PROFILES); IPR001611 (PROSITE_PROFILES); IPR001611 (PROSITE_PROFILES); IPR001611 (PROSITE_PROFILES); SSF52058 (SUPERFAMILY)                                                                                                                                                                                                                                         |
| 1903 | c92079_g1_i1_len_714_path_1_0_713_2                  | 15  | zinc finger protein 420-like                | 238 | 2.15E-20  | 50.20% | 0.119   | IPR015880 (SMART); IPR013087 (G3DSA:3.30.160.GENE3D); PF13465 (PFAM); IPR007087 (PFAM); PTHR24409:SF13 (PANTHER); PTHR24409 (PANTHER); IPR007087 (PROSITE_PATTERNS); IPR007087 (PROSITE_PATTERNS); IPR007087 (PROSITE_PATTERNS); IPR007087 (PROSITE_PATTERNS); IPR007087 (PROSITE_PATTERNS); IPR007087 (PROSITE_PATTERNS); SSF57667 (SUPERFAMILY); SSF57667 (SUPERFAMILY)                                                                                                                                                   |
| 1904 | c92205_g1_i1_len_712_path_1_0_711_3                  | 10  | spondin-1-like                              | 238 | 7.01E-87  | 69.20% | 0.108   | IPR002223 (PRINTS); IPR002223 (SMART); IPR000884 (SMART); IPR002223 (G3DSA:4.10.410.GENE3D); G3DSA:2.20.100.10 (GENE3D); IPR000884 (PFAM); IPR002223 (PFAM); PTHR11311 (PANTHER); PTHR11311:SF11 (PANTHER); IPR020901 (PROSITE_PATTERNS); IPR002223 (PROSITE_PROFILES); IPR000884 (PROSITE_PROFILES); IPR000884 (PROSITE_PROFILES); IPR002223 (SUPERFAMILY); IPR000884 (SUPERFAMILY); IPR000884 (SUPERFAMILY)                                                                                                               |
| 1905 | c9311_g1_i1_len_2782_path_2760_0_457_3218_458_2781_2 | 136 | 27 kda hemolymph                            | 920 | 3.65E-44  | 57.00% | 0.152   | IPR009832 (PFAM); PTHR20997 (PANTHER); CYTOPLASMIC_DOMAIN (PHOBIUS); TRANSMEMBRANE (PHOBIUS); CYTOPLASMIC_DOMAIN (PHOBIUS); TRANSMEMBRANE (PHOBIUS); TRANSMEMBRANE (PHOBIUS); NON_CYTOPLASMIC_DOMAIN (PHOBIUS); NON_CYTOPLASMIC_DOMAIN (PHOBIUS); NON_CYTOPLASMIC_DOMAIN (PHOBIUS); TRANSMEMBRANE (PHOBIUS); TMhelix (TMHMM); TMhelix (TMHMM)                                                                                                                                                                               |
| 1906 | c93283_g1_i1_len_1025_path_1003_0_1024_2             | 6   | succinate-semialdehyde partial              | 341 | 6.52E-111 | 99.30% | 0.097   | IPR015590 (PFAM); IPR016163 (G3DSA:3.40.309.GENE3D); PTHR11699 (PANTHER); PTHR11699:SF49 (PANTHER); IPR016161 (SUPERFAMILY)                                                                                                                                                                                                                                                                                                                                                                                                 |
| 1907 | c9348_g1_i1_len_1308_path_1314_0_1307_0              | 86  | thioredoxin-related transmembrane protein 1 | 436 | 4.83E-101 | 71.20% | 0.462 Y | IPR012336 (G3DSA:3.40.30.GENE3D); IPR013766 (PFAM); PTHR18929:SF81 (PANTHER); PTHR18929 (PANTHER); IPR017937 (PROSITE_PATTERNS); SIGNAL_PEPTIDE_N_REGION (PHOBIUS); SIGNAL_PEPTIDE_H_REGION (PHOBIUS); TRANSMEMBRANE (PHOBIUS); SIGNAL_PEPTIDE_C_REGION (PHOBIUS); NON_CYTOPLASMIC_DOMAIN (PHOBIUS); CYTOPLASMIC_DOMAIN (PHOBIUS); SIGNAL_PEPTIDE (PHOBIUS); IPR012336 (PROSITE_PROFILES); IPR012336 (SUPERFAMILY); TMhelix (TMHMM); TMhelix (TMHMM)                                                                        |
| 1908 | c9352_g1_i1_len_1303_path_1_0_1302_0                 | 28  | fasciclin-3 isoform x2                      | 435 | 1.89E-28  | 46.20% | 0.217   | IPR003599 (SMART); IPR013098 (PFAM); IPR013162 (PFAM); IPR013783 (G3DSA:2.60.40.GENE3D); IPR013783 (G3DSA:2.60.40.GENE3D); PTHR11640 (PANTHER); PTHR11640:SF52 (PANTHER); IPR007110 (PROSITE_PROFILES); IPR007110 (PROSITE_PROFILES); SSF48726 (SUPERFAMILY); SSF48726 (SUPERFAMILY)                                                                                                                                                                                                                                        |
| 1909 | c93564_g1_i1_len_185_path_163_0_184_3                | 0   | probable chitinase 3                        | 62  | 2.57E-14  | 72.90% | 0.158   | IPR013781 (G3DSA:3.20.20.GENE3D); IPR001223 (PFAM); PTHR11177:SF112 (PANTHER); PTHR11177 (PANTHER); IPR017853 (SUPERFAMILY)                                                                                                                                                                                                                                                                                                                                                                                                 |
| 1910 | c93719_g1_i1_len_677_path_694_0_676_1                | 16  | anti-lipopolysaccharide partial             | 226 | 1.61E-19  | 68.70% | 0.764 Y | IPR024509 (PFAM); CYTOPLASMIC_DOMAIN (PHOBIUS); TRANSMEMBRANE (PHOBIUS); SIGNAL_PEPTIDE_N_REGION (PHOBIUS); SIGNAL_PEPTIDE_H_REGION (PHOBIUS); NON_CYTOPLASMIC_DOMAIN (PHOBIUS); SIGNAL_PEPTIDE (PHOBIUS); SIGNAL_PEPTIDE_C_REGION (PHOBIUS); IPR024716 (PRODOM); SignalP-noTM (SIGNALP_GRAM_NEGATIVE); SignalP-TM (SIGNALP_GRAM_POSITIVE); SignalP-noTM (SIGNALP_EUK); TMhelix (TMHMM)                                                                                                                                     |
| 1911 | c9392_g1_i1_len_1168_path_1896_0_1167_2              | 20  | striatin- partial                           | 389 | 0         | 90.00% | 0.137   | IPR020472 (PRINTS); IPR001680 (SMART); IPR015943 (G3DSA:2.130.10.GENE3D); IPR001680 (PFAM); PTHR15653 (PANTHER); IPR019775 (PROSITE_PATTERNS); IPR019775 (PROSITE_PATTERNS); TRANSMEMBRANE (PHOBIUS); CYTOPLASMIC_DOMAIN (PHOBIUS); NON_CYTOPLASMIC_DOMAIN (PHOBIUS); CYTOPLASMIC_DOMAIN (PHOBIUS); TRANSMEMBRANE (PHOBIUS); IPR001680 (PROSITE_PROFILES); IPR001680 (PROSITE_PROFILES); IPR001680 (PROSITE_PROFILES); IPR001680 (PROSITE_PROFILES); IPR017986 (PROSITE_PROFILES); IPR017986 (SUPERFAMILY); TMhelix (TMHMM) |



|      |                                                                                                       |     |                                          |     |           |        |       |                                                                                                                                                                                                                                                                                                                                                                                                                                                                                                                                           |
|------|-------------------------------------------------------------------------------------------------------|-----|------------------------------------------|-----|-----------|--------|-------|-------------------------------------------------------------------------------------------------------------------------------------------------------------------------------------------------------------------------------------------------------------------------------------------------------------------------------------------------------------------------------------------------------------------------------------------------------------------------------------------------------------------------------------------|
| 1912 | c9402_g1_i1_len_1309_path_1312_0_1308_1                                                               | 222 | trans-l-3-hydroxyproline dehydratase     | 436 | 3.79E-144 | 76.10% | 0.174 | IPR008794 (PFAM); G3DSA:3.10.310.10 (GENE3D); G3DSA:3.10.310.10 (GENE3D); CYTOPLASMIC_DOMAIN (PHOBIUS); TRANSMEMBRANE (PHOBIUS); TRANSMEMBRANE (PHOBIUS); NON_CYTOPLASMIC_DOMAIN (PHOBIUS); CYTOPLASMIC_DOMAIN (PHOBIUS); SSF54506 (SUPERFAMILY); TMhelix (TMHMM); TMhelix (TMHMM)                                                                                                                                                                                                                                                        |
| 1913 | c94066_g1_i1_len_734_path_30_0_733_1                                                                  | 14  | ---NA---                                 | 245 |           |        | 0.101 | IPR029058 (G3DSA:3.40.50.GENE3D); CYTOPLASMIC_DOMAIN (PHOBIUS); TRANSMEMBRANE (PHOBIUS); NON_CYTOPLASMIC_DOMAIN (PHOBIUS); TRANSMEMBRANE (PHOBIUS); NON_CYTOPLASMIC_DOMAIN (PHOBIUS); CYTOPLASMIC_DOMAIN (PHOBIUS); TRANSMEMBRANE (PHOBIUS); NON_CYTOPLASMIC_DOMAIN (PHOBIUS); TRANSMEMBRANE (PHOBIUS); CYTOPLASMIC_DOMAIN (PHOBIUS); TRANSMEMBRANE (PHOBIUS); NON_CYTOPLASMIC_DOMAIN (PHOBIUS); TRANSMEMBRANE (PHOBIUS); TMhelix (TMHMM); TMhelix (TMHMM); TMhelix (TMHMM); TMhelix (TMHMM); TMhelix (TMHMM)                             |
| 1914 | c9413_g1_i1_len_1349_path_1327_0_109_1437_110_1348_1                                                  | 68  | matrix metalloproteinase-15-like         | 450 | 1.02E-93  | 74.80% | 0.108 | IPR018487 (SMART); IPR018487 (PFAM); IPR000585 (G3DSA:2.110.10.GENE3D); PTHR10201:SF135 (PANTHER); PTHR10201 (PANTHER); TRANSMEMBRANE (PHOBIUS); CYTOPLASMIC_DOMAIN (PHOBIUS); NON_CYTOPLASMIC_DOMAIN (PHOBIUS); NON_CYTOPLASMIC_DOMAIN (PHOBIUS); TRANSMEMBRANE (PHOBIUS); TRANSMEMBRANE (PHOBIUS); CYTOPLASMIC_DOMAIN (PHOBIUS); IPR018487 (PROSITE_PROFILES); IPR018487 (PROSITE_PROFILES); IPR018487 (PROSITE_PROFILES); IPR018487 (PROSITE_PROFILES); IPR000585 (SUPERFAMILY); TMhelix (TMHMM); TMhelix (TMHMM); TMhelix (TMHMM)     |
| 1915 | c94291_g1_i1_len_586_path_1_0_585_4                                                                   | 11  | aldehyde oxidase                         | 195 | 1.35E-17  | 81.10% | 0.11  | IPR002888 (G3DSA:1.10.150.GENE3D); IPR002888 (PFAM); PTHR11908:SF65 (PANTHER); PTHR11908 (PANTHER); CYTOPLASMIC_DOMAIN (PHOBIUS); TRANSMEMBRANE (PHOBIUS); NON_CYTOPLASMIC_DOMAIN (PHOBIUS); IPR002888 (SUPERFAMILY)                                                                                                                                                                                                                                                                                                                      |
| 1916 | c94363_g1_i1_len_170_path_195_0_169_1                                                                 | 0   | ppo2 protein                             | 57  | 1.33E-13  | 77.60% | 0.099 | IPR008922 (G3DSA:1.10.1280.GENE3D); IPR000896 (PFAM); PTHR11511:SF24 (PANTHER); IPR013788 (PANTHER); IPR008922 (SUPERFAMILY)                                                                                                                                                                                                                                                                                                                                                                                                              |
| 1917 | c9443_g1_i1_len_749_path_1570_0_592_510_593_622_501_623_631_510_632_661_501_662_670_510_671_700_501_5 | 30  | ---NA---                                 | 249 |           |        | 0.118 | no IPS match                                                                                                                                                                                                                                                                                                                                                                                                                                                                                                                              |
| 1918 | c94882_g1_i1_len_326_path_1_0_325_3                                                                   | 4   | probable chitinase 3                     | 109 | 4.47E-18  | 75.50% | 0.236 | IPR013781 (G3DSA:3.20.20.GENE3D); IPR001223 (PFAM); PTHR11177:SF109 (PANTHER); PTHR11177 (PANTHER); TRANSMEMBRANE (PHOBIUS); CYTOPLASMIC_DOMAIN (PHOBIUS); NON_CYTOPLASMIC_DOMAIN (PHOBIUS); IPR017853 (SUPERFAMILY); TMhelix (TMHMM)                                                                                                                                                                                                                                                                                                     |
| 1919 | c95262_g1_i1_len_287_path_1_0_286_1                                                                   | 0   | retinal dehydrogenase 1-like             | 96  | 3.49E-43  | 87.20% | 0.113 | IPR015590 (PFAM); IPR016162 (G3DSA:3.40.605.GENE3D); PTHR11699:SF145 (PANTHER); PTHR11699 (PANTHER); IPR029510 (PROSITE_PATTERNS); IPR016161 (SUPERFAMILY)                                                                                                                                                                                                                                                                                                                                                                                |
| 1920 | c9548_g1_i1_len_1177_path_1_0_1044_1046_1045_1056_1058_1057_1176_2                                    | 57  | alpha-mannosidase 2                      | 392 | 5.88E-157 | 72.90% | 0.112 | IPR011682 (PFAM); G3DSA:2.70.98.30 (GENE3D); PTHR11607 (PANTHER); PTHR11607:SF22 (PANTHER); IPR011013 (SUPERFAMILY)                                                                                                                                                                                                                                                                                                                                                                                                                       |
| 1921 | c955_g1_i1_len_888_path_866_0_887_2                                                                   | 33  | thioredoxin-dependent peroxide reductase | 296 | 2.33E-127 | 84.70% | 0.204 | IPR000866 (PFAM); IPR019479 (PFAM); IPR012336 (G3DSA:3.40.30.GENE3D); PTHR10681:SF101 (PANTHER); PTHR10681 (PANTHER); IPR012336 (PROSITE_PROFILES); IPR012336 (SUPERFAMILY)                                                                                                                                                                                                                                                                                                                                                               |
| 1922 | c9605_g1_i1_len_1442_path_1_0_1441_2                                                                  | 126 | tho complex subunit 3                    | 475 | 0         | 86.90% | 0.106 | IPR020472 (PRINTS); IPR001680 (SMART); IPR015943 (G3DSA:2.130.10.GENE3D); IPR001680 (PFAM); IPR011659 (PFAM); IPR015943 (G3DSA:2.130.10.GENE3D); PTHR22839 (PANTHER); IPR019775 (PROSITE_PATTERNS); NON_CYTOPLASMIC_DOMAIN (PHOBIUS); NON_CYTOPLASMIC_DOMAIN (PHOBIUS); TRANSMEMBRANE (PHOBIUS); TRANSMEMBRANE (PHOBIUS); CYTOPLASMIC_DOMAIN (PHOBIUS); IPR001680 (PROSITE_PROFILES); IPR017986 (PROSITE_PROFILES); IPR001680 (PROSITE_PROFILES); IPR001680 (PROSITE_PROFILES); IPR017986 (SUPERFAMILY); TMhelix (TMHMM); TMhelix (TMHMM) |
| 1923 | c96160_g1_i1_len_232_path_1_0_231_3                                                                   | 0   | tyrosine-protein kinase src64b           | 78  | 1.28E-09  | 81.60% | 0.317 | G3DSA:1.10.510.10 (GENE3D); IPR001245 (PFAM); PTHR24416:SF210 (PANTHER); PTHR24416 (PANTHER); TRANSMEMBRANE (PHOBIUS); CYTOPLASMIC_DOMAIN (PHOBIUS); TRANSMEMBRANE (PHOBIUS); CYTOPLASMIC_DOMAIN (PHOBIUS); NON_CYTOPLASMIC_DOMAIN (PHOBIUS); IPR011009 (SUPERFAMILY); TMhelix (TMHMM); TMhelix (TMHMM)                                                                                                                                                                                                                                   |

|      |                                         |    |                                      |     |           |         |         |                                                                                                                                                                                                                                                                                                                                                                                                                                                     |
|------|-----------------------------------------|----|--------------------------------------|-----|-----------|---------|---------|-----------------------------------------------------------------------------------------------------------------------------------------------------------------------------------------------------------------------------------------------------------------------------------------------------------------------------------------------------------------------------------------------------------------------------------------------------|
| 1924 | c96465_g1_i1_len_562_path_1_0_561_2     | 3  | transmembrane protease serine 9-like | 187 | 1.63E-24  | 54.90%  | 0.111   | G3DSA:2.40.10.10 (GENE3D); IPR015420 (PFAM); PTHR24256:SF89 (PANTHER); PTHR24256 (PANTHER); IPR001254 (PROSITE_PROFILES); IPR009003 (SUPERFAMILY)                                                                                                                                                                                                                                                                                                   |
| 1925 | c96512_g1_i1_len_606_path_1_0_605_5     | 4  | otoancorin isoform x1                | 202 | 3.20E-23  | 51.20%  | 0.104   | IPR026664 (PANTHER); PTHR23412:SF17 (PANTHER); CYTOPLASMIC_DOMAIN (PHOBIUS); NON_CYTOPLASMIC_DOMAIN (PHOBIUS); TRANSMEMBRANE (PHOBIUS)                                                                                                                                                                                                                                                                                                              |
| 1926 | c96559_g1_i1_len_573_path_551_0_572_3   | 3  | tyrosine-protein kinase src42a       | 191 | 7.74E-27  | 97.80%  | 0.211   | IPR001245 (PFAM); G3DSA:3.30.200.20 (GENE3D); PTHR24418:SF190 (PANTHER); PTHR24418 (PANTHER); NON_CYTOPLASMIC_DOMAIN (PHOBIUS); NON_CYTOPLASMIC_DOMAIN (PHOBIUS); CYTOPLASMIC_DOMAIN (PHOBIUS); TRANSMEMBRANE (PHOBIUS); TRANSMEMBRANE (PHOBIUS); NON_CYTOPLASMIC_DOMAIN (PHOBIUS); TRANSMEMBRANE (PHOBIUS); CYTOPLASMIC_DOMAIN (PHOBIUS); IPR000719 (PROSITE_PROFILES); IPR011009 (SUPERFAMILY); TMhelix (TMHMM); TMhelix (TMHMM); TMhelix (TMHMM) |
| 1927 | c96607_g1_i1_len_465_path_1_0_464_0     | 7  | gamma-glutamyl hydrolase             | 155 | 1.38E-48  | 65.80%  | 0.099   | IPR011697 (PFAM); IPR029062 (G3DSA:3.40.50.GENE3D); IPR015527 (PANTHER); IPR015527 (PROSITE_PROFILES); IPR029062 (SUPERFAMILY)                                                                                                                                                                                                                                                                                                                      |
| 1928 | c96848_g1_i1_len_1090_path_1_0_1089_1   | 2  | ---NA---                             | 363 |           |         | 0.246   | no IPS match                                                                                                                                                                                                                                                                                                                                                                                                                                        |
| 1929 | c96848_g1_i1_len_1090_path_1_0_1089_2   | 2  | ---NA---                             | 363 |           |         | 0.178   | CYTOPLASMIC_DOMAIN (PHOBIUS); TRANSMEMBRANE (PHOBIUS); NON_CYTOPLASMIC_DOMAIN (PHOBIUS)                                                                                                                                                                                                                                                                                                                                                             |
| 1930 | c97082_g1_i1_len_637_path_615_0_636_2   | 6  | leucomyosuppressin precursor         | 207 | 4.46E-15  | 68.90%  | 0.768 Y | TRANSMEMBRANE (PHOBIUS); CYTOPLASMIC_DOMAIN (PHOBIUS); SIGNAL_PEPTIDE_C_REGION (PHOBIUS); SIGNAL_PEPTIDE_H_REGION (PHOBIUS); NON_CYTOPLASMIC_DOMAIN (PHOBIUS); NON_CYTOPLASMIC_DOMAIN (PHOBIUS); SIGNAL_PEPTIDE_N_REGION (PHOBIUS); SIGNAL_PEPTIDE (PHOBIUS); TRANSMEMBRANE (PHOBIUS); SignalP-TM (SIGNALP_GRAM_POSITIVE); SignalP-noTM (SIGNALP_EUK); SignalP-noTM (SIGNALP_GRAM_NEGATIVE); TMhelix (TMHMM); TMhelix (TMHMM)                       |
| 1931 | c97286_g1_i1_len_497_path_475_0_496_5   | 4  | alkaline phosphatase                 | 165 | 1.29E-52  | 100.00% | 0.106   | IPR001952 (PFAM); IPR017849 (G3DSA:3.40.720.GENE3D); IPR017850 (SUPERFAMILY)                                                                                                                                                                                                                                                                                                                                                                        |
| 1932 | c97605_g1_i1_len_898_path_1_0_897_0     | 16 | venom allergen partial               | 300 | 1.54E-20  | 56.60%  | 0.129   | IPR001283 (PRINTS); IPR002413 (PRINTS); IPR014044 (SMART); IPR014044 (G3DSA:3.40.33.GENE3D); IPR014044 (PFAM); IPR001283 (PANTHER); IPR018244 (PROSITE_PATTERNS); IPR014044 (SUPERFAMILY)                                                                                                                                                                                                                                                           |
| 1933 | c97826_g1_i1_len_491_path_469_0_490_5   | 5  | odorant-binding protein 4            | 155 | 1.25E-44  | 72.00%  | 0.101   | IPR006170 (PRINTS); IPR006170 (SMART); IPR023316 (G3DSA:1.10.238.GENE3D); IPR006170 (PFAM); PTHR11857:SF4 (PANTHER); PTHR11857 (PANTHER); TRANSMEMBRANE (PHOBIUS); CYTOPLASMIC_DOMAIN (PHOBIUS); NON_CYTOPLASMIC_DOMAIN (PHOBIUS); TRANSMEMBRANE (PHOBIUS); CYTOPLASMIC_DOMAIN (PHOBIUS); IPR023316 (SUPERFAMILY); TMhelix (TMHMM); TMhelix (TMHMM)                                                                                                 |
| 1934 | c9816_g1_i1_len_1297_path_1_0_1296_1    | 20 | venom serine protease                | 432 | 2.04E-63  | 52.60%  | 0.103   | IPR001314 (PRINTS); IPR001254 (SMART); IPR006604 (SMART); IPR001254 (PFAM); G3DSA:2.40.10.10 (GENE3D); IPR022700 (PFAM); G3DSA:2.40.10.10 (GENE3D); G3DSA:2.40.10.10 (GENE3D); PTHR24268 (PANTHER); IPR018114 (PROSITE_PATTERNS); IPR018114 (PROSITE_PATTERNS); IPR001254 (PROSITE_PROFILES); IPR009003 (SUPERFAMILY)                                                                                                                               |
| 1935 | c9825_g2_i1_len_1600_path_2466_0_1599_3 | 24 | svil partial                         | 534 | 1.04E-160 | 70.80%  | 0.126   | IPR007122 (PRINTS); IPR003128 (SMART); IPR007122 (SMART); IPR029006 (G3DSA:3.40.20.GENE3D); IPR003128 (G3DSA:1.10.950.GENE3D); IPR007123 (PFAM); IPR003128 (PFAM); IPR029006 (G3DSA:3.40.20.GENE3D); PTHR11977:SF23 (PANTHER); IPR007122 (PANTHER); IPR003128 (PROSITE_PROFILES); SSF55753 (SUPERFAMILY); IPR003128 (SUPERFAMILY); SSF55753 (SUPERFAMILY); SSF55753 (SUPERFAMILY)                                                                   |
| 1936 | c98876_g1_i1_len_447_path_451_0_446_1   | 5  | zinc finger protein 502              | 136 | 2.41E-29  | 62.40%  | 0.099   | IPR015880 (SMART); IPR007087 (PFAM); IPR013087 (G3DSA:3.30.160.GENE3D); IPR013087 (G3DSA:3.30.160.GENE3D); PF13465 (PFAM); IPR013087 (G3DSA:3.30.160.GENE3D); PTHR24409 (PANTHER); PTHR24409:SF13 (PANTHER); IPR007087 (PROSITE_PATTERNS); IPR007087 (PROSITE_PATTERNS); IPR007087 (PROSITE_PATTERNS); IPR007087 (PROSITE_PROFILES); IPR007087 (PROSITE_PROFILES); IPR007087 (PROSITE_PROFILES); SSF57667 (SUPERFAMILY); SSF57667 (SUPERFAMILY)     |

|      |                                                                         |    |                                                                                                                      |     |          |        |         |                                                                                                                                                                                                                                                                                                                                                              |
|------|-------------------------------------------------------------------------|----|----------------------------------------------------------------------------------------------------------------------|-----|----------|--------|---------|--------------------------------------------------------------------------------------------------------------------------------------------------------------------------------------------------------------------------------------------------------------------------------------------------------------------------------------------------------------|
| 1937 | c9912_g1_i2_len_659_path_1_0_482_484_483_658_2                          | 10 | adam 17-like protease                                                                                                | 219 | 2.09E-67 | 70.20% | 0.434 Y | IPR002870 (PFAM); PTHR11905 (PANTHER); PTHR11905:SF121 (PANTHER); CYTOPLASMIC_DOMAIN (PHOBIUS); NON_CYTOPLASMIC_DOMAIN (PHOBIUS); TRANSMEMBRANE (PHOBIUS)                                                                                                                                                                                                    |
| 1938 | c99311_g1_i1_len_491_path_1_0_490_5                                     | 8  | huga_polan ame: full=hyaluronidase short=hya ame: full=hyaluronoglucosaminidase ame: allergen=pol a 2 flags: partial | 163 | 1.36E-39 | 62.90% | 0.099   | IPR018155 (PRINTS); IPR013785 (G3DSA:3.20.20.GENE3D); IPR018155 (PFAM); IPR018155 (PANTHER); PTHR11769:SF8 (PANTHER); IPR017853 (SUPERFAMILY)                                                                                                                                                                                                                |
| 1939 | c99333_g1_i1_len_467_path_1_0_304_306_305_358_306_359_412_306_413_466_0 | 7  | mucin binding protein                                                                                                | 156 | 3.00E-10 | 56.30% | 0.107   | no IPS match                                                                                                                                                                                                                                                                                                                                                 |
| 1940 | c99333_g1_i1_len_467_path_1_0_304_306_305_358_306_359_412_306_413_466_3 | 7  | collagen-like protein partial                                                                                        | 156 | 7.46E-09 | 57.17% | 0.114   | IPR008160 (PFAM)                                                                                                                                                                                                                                                                                                                                             |
| 1941 | c99470_g1_i1_len_289_path_267_0_288_2                                   | 2  | down syndrome cell adhesion molecule-like protein dscam2                                                             | 96  | 6.91E-25 | 70.10% | 0.135   | IPR003961 (PFAM); IPR013783 (G3DSA:2.60.40.GENE3D); PTHR10489:SF567 (PANTHER); PTHR10489 (PANTHER); IPR003961 (PROSITE_PROFILES); IPR003961 (SUPERFAMILY)                                                                                                                                                                                                    |
| 1942 | c99590_g1_i1_len_228_path_1_0_227_3                                     | 0  | zinc finger protein 891                                                                                              | 76  | 2.77E-16 | 68.50% | 0.131   | IPR015880 (SMART); IPR013087 (G3DSA:3.30.160.GENE3D); PF13465 (PFAM); IPR013087 (G3DSA:3.30.160.GENE3D); PTHR24409:SF13 (PANTHER); PTHR24409 (PANTHER); IPR007087 (PROSITE_PATTERNS); IPR007087 (PROSITE_PATTERNS); IPR007087 (PROSITE_PROFILES); IPR007087 (PROSITE_PROFILES); IPR007087 (PROSITE_PROFILES); SSF57667 (SUPERFAMILY); SSF57667 (SUPERFAMILY) |
| 1943 | c99624_g1_i1_len_378_path_396_0_377_1                                   | 5  | serine protease like protein                                                                                         | 126 | 1.67E-23 | 63.80% | 0.104   | IPR001254 (SMART); G3DSA:2.40.10.10 (GENE3D); IPR001254 (PFAM); PTHR24265 (PANTHER); IPR018114 (PROSITE_PATTERNS); IPR001254 (PROSITE_PROFILES); IPR009003 (SUPERFAMILY)                                                                                                                                                                                     |
